# Supplementary material for: H3K4me1 marks DNA regions hypomethylated during aging in human stem and differentiated cells
Source: HighWire-hosted journal article supplement (doi:10.1101/gr.169011.113), 2014-09-30
Supplement: Supplemental_Table_1.xlsx [file Supplemental_Table_1.xlsx]

## Sheet: ST1
Supplemental Table 1.Information available on donors and experiments carried out in the human mesenchymal stem cells included in the study
Sample ID	Methylation assay	Age (years)	Gender	Nº Passages	Lesion	Extraction	Isolation	Culture
MSC-1	1	2	female	5	OS	BM aspirates	ficoll	hMSC medium
MSC-2	1	2	female	5	OS	BM aspirates	ficoll	hMSC medium
MSC-3	1	3	female	4	OS	BM aspirates	ficoll	hMSC medium
MSC-4	1	3	female	4	OS	BM aspirates	ficoll	hMSC medium
MSC-5	1	6	female	4	OS	BM aspirates	ficoll	hMSC medium
MSC-6	1	6	female	4	OS	BM aspirates	ficoll	hMSC medium
MSC-7	1	9	female	4	OS	BM aspirates	ficoll	hMSC medium
MSC-8	1	10	female	4	OS	BM aspirates	ficoll	hMSC medium
MSC-9	1	10	male	5	OS	BM aspirates	ficoll	hMSC medium
MSC-10	1	10	female	4	OS	BM aspirates	ficoll	hMSC medium
MSC-11	1	10	male	4	OS	BM aspirates	ficoll	hMSC medium
MSC-12	1	12	female	4	OS	BM aspirates	ficoll	hMSC medium
MSC-13	1	12	female	4	OS	BM aspirates	ficoll	hMSC medium
MSC-14	1	14	female	4	OS	BM aspirates	ficoll	hMSC medium
MSC-15	1	18	male	4	HD	BM aspirates	ficoll	hMSC medium
MSC-16	1	19	male	5	HD	BM aspirates	ficoll	hMSC medium
MSC-17	1	22	male	4	HD	BM aspirates	ficoll	hMSC medium
MSC-18	1	22	male	4	HD	BM aspirates	ficoll	hMSC medium
MSC-19	1	22	male	6	HD	BM aspirates	ficoll	hMSC medium
MSC-20	1	22	male	5	HD	BM aspirates	ficoll	hMSC medium
MSC-21	1	28	male	4	HD	BM aspirates	ficoll	hMSC medium
MSC-22	1	29	male	5	HD	BM aspirates	ficoll	hMSC medium
MSC-23	1	61	female	6	OP	Bone Scraping	ficoll	hMSC medium
MSC-24	1	63	male	6	OA	Bone Scraping	ficoll	hMSC medium
MSC-25	1	70	female	6	OP	Bone Scraping	ficoll	hMSC medium
MSC-26	1	77	female	6	OP	Bone Scraping	ficoll	hMSC medium
MSC-27	1	79	female	7	OP	Bone Scraping	ficoll	hMSC medium
MSC-28	1	80	male	6	OP	Bone Scraping	ficoll	hMSC medium
MSC-29	1	86	female	6	OP	Bone Scraping	ficoll	hMSC medium
MSC-30	1	87	female	6	OP	Bone Scraping	ficoll	hMSC medium
MSC-31	1	87	male	6	OP	Bone Scraping	ficoll	hMSC medium
MSC-32	1	89	female	7	OP	Bone Scraping	ficoll	hMSC medium
MSC-33	1	91	female	8	OP	Bone Scraping	ficoll	hMSC medium
MSC-34	1	92	female	7	OP	Bone Scraping	ficoll	hMSC medium
MSC-35	2	0.7	male	4	HD	thoracotomy	whole BM	hMSC medium
MSC-36	2	1	male	3	HD	thoracotomy	whole BM	hMSC medium
MSC-37	2	2	female	3	HD	BM Aspiration	percoll	hMSC medium
MSC-38	2	3	male	1	HD	thoracotomy	whole BM	hMSC medium
MSC-39	2	3	male	1	HD	BM Aspiration	whole BM	hMSC medium
MSC-40	2	4	male	4	HD	thoracotomy	whole BM	hMSC medium
MSC-41	2	5	male	4	HD	BM Aspiration	whole BM	hMSC medium
MSC-42	2	6	male	2	HD	thoracotomy	whole BM	hMSC medium
MSC-43	2	7	male	4	HD	BM Aspiration	ficoll	hMSC medium
MSC-44	2	7	male	2	HD	BM Aspiration	whole BM	hMSC medium
MSC-45	2	7	male	5	HD	BM Aspiration	whole BM	hMSC medium
MSC-46	2	8	male	4	HD	BM Aspiration	percoll	hMSC medium
MSC-47	2	12	male	4	HD	BM Aspiration	whole BM	hMSC medium
MSC-48	2	12	female	6	HD	thoracotomy	whole BM	hMSC medium
MSC-49	2	13	male	4	HD	BM Aspiration	whole BM	hMSC medium
MSC-50	2	13	female	4	HD	BM Aspiration	whole BM	hMSC medium
MSC-51	2	17	male	2	OS	BM Aspiration	Attachment of cells	hMSC medium
MSC-52	2	19	female	2	OS	BM Aspiration	Attachment of cells	hMSC medium
MSC-53	2	21	male	2	OS	BM Aspiration	Attachment of cells	hMSC medium
MSC-54	2	21	male	5	HD	BM Aspiration	ficoll	hMSC medium
MSC-55	2	21	female	3	HD	BM Aspiration	percoll	hMSC medium
MSC-56	2	29	female	1	HD	BM Aspiration	ficoll	hMSC medium
MSC-57	2	34	female	2	OS	BM Aspiration	Attachment of cells	hMSC medium
MSC-58	2	36	male	2	OS	BM Aspiration	Attachment of cells	hMSC medium
MSC-59	2	37	female	2	OS	BM Aspiration	Attachment of cells	hMSC medium
MSC-60	2	39	male	2	OS	BM Aspiration	Attachment of cells	hMSC medium
MSC-61	2	42	-	5	-	-	ficoll	hMSC medium
MSC-62	2	44	male	2	HD	BM Aspiration	ficoll	hMSC medium
MSC-63	2	46	female	2	OS	BM Aspiration	Attachment of cells	hMSC medium
MSC-64	2	46	male	2	HD	BM Aspiration	ficoll	hMSC medium
MSC-65	2	47	male	2	HD	BM Aspiration	ficoll	hMSC medium
MSC-66	2	53	female	2	OS	BM Aspiration	Attachment of cells	hMSC medium
MSC-67	2	54	female	2	OS	BM Aspiration	Attachment of cells	hMSC medium
MSC-68	2	55	male	5	-	-	ficoll	hMSC medium
MSC-69	2	56	female	2	OS	BM Aspiration	Attachment of cells	hMSC medium
MSC-70	2	59	male	2	HD	BM Aspiration	ficoll	hMSC medium
MSC-71	2	59	male	2	HD	BM Aspiration	ficoll	hMSC medium
MSC-72	2	61	female	2	OS	BM Aspiration	Attachment of cells	hMSC medium
MSC-73	2	61	male	2	HD	BM Aspiration	ficoll	hMSC medium
MSC-74	2	65	female	2	HD	BM Aspiration	ficoll	hMSC medium
MSC-75	2	68	female	2	OS	BM Aspiration	Attachment of cells	hMSC medium
MSC-76	2	69	male	2	OS	BM Aspiration	Attachment of cells	hMSC medium
MSC-77	2	75	female	2	OS	BM Aspiration	Attachment of cells	hMSC medium
MSC-78	2	75	female	2	OS	BM Aspiration	Attachment of cells	hMSC medium
MSC-79	2	75	male	2	HD	BM Aspiration	ficoll	hMSC medium
MSC-80	2	80	male	2	HD	BM Aspiration	ficoll	hMSC medium
Methylation assay 1: 450K Methylation array
Methylation assay 2: Bisulfite pyrosequencing validation
HD: healthy donor
OS: orthopedic surgery
OA: hip osteoarthritis
OP: osteoporotic hip fracture
