# Supplementary material for: H3K4me1 marks DNA regions hypomethylated during aging in human stem and differentiated cells
Source: HighWire-hosted journal article supplement (doi:10.1101/gr.169011.113), 2014-09-30
Supplement: Supplemental_Table_2.xlsx [file Supplemental_Table_2.xlsx]

## Sheet: ST2
Supplemental Table 2: List of CpG sites hypermethylated in MSCs during aging
Target ID	geneId	geneSymbol	Chromosome	start	end	hmm.cpgi	hmm.cpgi.nodir	prom.reg	intra.reg	inter.reg	avg_m_young	avg_m_old	avg_beta_young	avg_beta_old
cg00000292	487	ATP2A1	chr16	28890100	28890101	CGI-N-Shore	CGI-Shore	TRUE	TRUE	FALSE	0.185453	0.932649	0.53162	0.646341
cg00002749	81671	VMP1	chr17	57839538	57839539	Non-CGI	Non-CGI	FALSE	TRUE	FALSE	0.867973	2.7579	0.626892	0.866393
cg00003181	100507557	LOC100507557	chr6	146157367	146157368	Non-CGI	Non-CGI	FALSE	TRUE	FALSE	-1.83534	0.969949	0.221851	0.639334
cg00005541	NA	NA	chr12	133009863	133009864	CGI	CGI	FALSE	FALSE	TRUE	-0.283309	0.804438	0.455207	0.621133
cg00006090	83449	PMFBP1	chr16	72206655	72206656	Non-CGI	Non-CGI	TRUE	FALSE	FALSE	1.62748	2.81463	0.752812	0.872273
cg00008446	3645	INSRR	chr1	156815774	156815775	CGI	CGI	FALSE	TRUE	FALSE	-1.10782	0.217182	0.32247	0.53452
cg00008446	4914	NTRK1	chr1	156815774	156815775	CGI	CGI	FALSE	TRUE	FALSE	-1.10782	0.217182	0.32247	0.53452
cg00008621	3091	HIF1A	chr14	62179983	62179984	Non-CGI	Non-CGI	FALSE	TRUE	FALSE	1.57326	2.88835	0.738374	0.86983
cg00008629	100422990	MIR3134	chr9	115093661	115093662	CGI-N-Shore	CGI-Shore	FALSE	TRUE	FALSE	-1.72607	0.667857	0.235703	0.5998
cg00008629	9991	PTBP3	chr9	115093661	115093662	CGI-N-Shore	CGI-Shore	FALSE	TRUE	FALSE	-1.72607	0.667857	0.235703	0.5998
cg00008971	126661	CCDC163P	chr1	45966925	45966926	CGI-S-Shore	CGI-Shore	TRUE	TRUE	FALSE	2.10036	3.44375	0.801482	0.904705
cg00008971	25974	MMACHC	chr1	45966925	45966926	CGI-S-Shore	CGI-Shore	TRUE	TRUE	FALSE	2.10036	3.44375	0.801482	0.904705
cg00009196	54453	RIN2	chr20	19954588	19954589	CGI-N-Shore	CGI-Shore	FALSE	TRUE	FALSE	0.747189	1.86016	0.619151	0.779951
cg00009349	NA	NA	chr14	22674549	22674550	Non-CGI	Non-CGI	TRUE	TRUE	FALSE	2.00557	2.6622	0.794874	0.85794
cg00009553	1006	CDH8	chr16	61854084	61854085	Non-CGI	Non-CGI	FALSE	TRUE	FALSE	0.475126	1.42877	0.578451	0.725129
cg00010932	29081	METTL5	chr2	170680664	170680665	CGI-N-Shore	CGI-Shore	FALSE	TRUE	FALSE	-2.1722	-0.770131	0.183008	0.381902
cg00010946	6474	SHOX2	chr3	157819282	157819283	CGI-N-Shore	CGI-Shore	FALSE	TRUE	FALSE	2.41738	4.02571	0.827759	0.938076
cg00011861	NA	NA	chr14	103607265	103607266	CGI-S-Shore	CGI-Shore	FALSE	FALSE	TRUE	-1.73079	-0.945504	0.235412	0.348025
cg00012317	100132417	FCGR1C	chr1	149370974	149370975	Non-CGI	Non-CGI	FALSE	TRUE	FALSE	1.05356	1.67986	0.670362	0.757502
cg00013899	57685	CACHD1	chr1	64992433	64992434	Non-CGI	Non-CGI	FALSE	TRUE	FALSE	0.833871	1.91372	0.63696	0.775105
cg00014754	8000	PSCA	chr8	143761811	143761812	Non-CGI	Non-CGI	TRUE	TRUE	FALSE	1.31117	1.99664	0.710079	0.782622
cg00014786	NA	NA	chr7	6614945	6614946	CGI-N-Shelf	CGI-Shelf	FALSE	FALSE	TRUE	1.84855	2.49781	0.774853	0.842257
cg00016324	55843	ARHGAP15	chr2	144223682	144223683	Non-CGI	Non-CGI	FALSE	TRUE	FALSE	-0.532874	2.13963	0.410866	0.78181
cg00016913	51268	PIPOX	chr17	27369892	27369893	Non-CGI	Non-CGI	TRUE	FALSE	FALSE	-0.716438	0.310183	0.379775	0.551847
cg00017271	332	BIRC5	chr17	76220743	76220744	CGI	CGI	TRUE	TRUE	FALSE	0.850119	1.7807	0.627996	0.757418
cg00017461	5008	OSM	chr22	30663316	30663317	CGI-S-Shore	CGI-Shore	TRUE	FALSE	FALSE	1.16279	3.24296	0.686897	0.892708
cg00018606	1421	CRYGD	chr2	208989425	208989426	CGI-S-Shore	CGI-Shore	TRUE	TRUE	FALSE	-0.700005	0.381418	0.382589	0.560901
cg00018606	100507443	LOC100507443	chr2	208989425	208989426	CGI-S-Shore	CGI-Shore	TRUE	TRUE	FALSE	-0.700005	0.381418	0.382589	0.560901
cg00018828	8912	CACNA1H	chr16	1245911	1245912	CGI-S-Shore	CGI-Shore	FALSE	TRUE	FALSE	0.08607	0.762261	0.515153	0.626285
cg00019495	84525	HOPX	chr4	57547525	57547526	Non-CGI	Non-CGI	TRUE	FALSE	FALSE	-1.52838	-0.873736	0.261756	0.364353
cg00020474	NA	NA	chr1	8214963	8214964	Non-CGI	Non-CGI	FALSE	FALSE	TRUE	-0.378074	1.37416	0.437469	0.701669
cg00022054	NA	NA	chr1	48177261	48177262	CGI-S-Shore	CGI-Shore	FALSE	FALSE	TRUE	-0.988702	0.139783	0.341392	0.523896
cg00025044	2074	ERCC6	chr10	50716478	50716479	Non-CGI	Non-CGI	TRUE	TRUE	FALSE	2.61232	3.94732	0.849899	0.937629
cg00026290	116449	CLNK	chr4	10686554	10686555	Non-CGI	Non-CGI	TRUE	FALSE	FALSE	1.00514	2.07249	0.65711	0.796545
cg00026553	374655	ZNF710	chr15	90562839	90562840	Non-CGI	Non-CGI	FALSE	TRUE	FALSE	1.6543	2.94462	0.752229	0.873157
cg00027120	259285	TAS2R39	chr7	142880832	142880833	Non-CGI	Non-CGI	TRUE	FALSE	FALSE	1.1308	1.99166	0.682181	0.790224
cg00027586	NA	NA	chr18	76148676	76148677	CGI-N-Shore	CGI-Shore	FALSE	FALSE	TRUE	-1.35924	-0.135164	0.28282	0.477803
cg00027674	23682	RAB38	chr11	87908897	87908898	CGI-S-Shore	CGI-Shore	TRUE	FALSE	FALSE	-1.44463	-0.548666	0.276691	0.412813
cg00028429	NA	NA	chr15	101273479	101273480	Non-CGI	Non-CGI	FALSE	FALSE	TRUE	-2.55169	-1.43219	0.147096	0.293416
cg00030296	10801	2009-09-01	chr17	75318732	75318733	CGI	CGI	FALSE	TRUE	FALSE	-2.16803	-0.367725	0.18454	0.443543
cg00031973	NA	NA	chr7	47783848	47783849	CGI-S-Shore	CGI-Shore	FALSE	FALSE	TRUE	-1.91274	-0.938339	0.210926	0.352392
cg00032643	57470	LRRC47	chr1	3700680	3700681	CGI	CGI	FALSE	TRUE	FALSE	1.39793	2.5042	0.719625	0.841399
cg00033155	4867	NPHP1	chr2	110925418	110925419	Non-CGI	Non-CGI	FALSE	TRUE	FALSE	-1.76617	-0.275184	0.231933	0.460778
cg00034336	NA	NA	chr2	8684126	8684127	CGI-N-Shore	CGI-Shore	FALSE	FALSE	TRUE	1.09997	2.40009	0.670696	0.803544
cg00036788	5156	PDGFRA	chr4	54974682	54974683	CGI	CGI	FALSE	TRUE	FALSE	2.03344	3.12115	0.795571	0.88192
cg00037013	NA	NA	chr2	219722536	219722537	CGI-N-Shore	CGI-Shore	FALSE	FALSE	TRUE	-2.73707	-1.97031	0.130896	0.208904
cg00038675	4184	SMCP	chr1	152853543	152853544	Non-CGI	Non-CGI	FALSE	TRUE	FALSE	-0.500484	0.859271	0.416217	0.638975
cg00039326	27095	TRAPPC3	chr1	36615845	36615846	CGI-S-Shore	CGI-Shore	TRUE	FALSE	FALSE	-2.00353	-0.400477	0.201738	0.43966
cg00040016	81671	VMP1	chr17	57833286	57833287	Non-CGI	Non-CGI	FALSE	TRUE	FALSE	1.68536	2.77944	0.753122	0.86665
cg00040268	3200	HOXA3	chr7	27152899	27152900	CGI-N-Shore	CGI-Shore	FALSE	TRUE	FALSE	-0.541516	2.42094	0.404784	0.793227
cg00041368	201477	DLGAP1-AS3	chr18	3879131	3879132	CGI-N-Shore	CGI-Shore	TRUE	TRUE	FALSE	3.23534	4.03877	0.896761	0.941489
cg00041368	9229	DLGAP1	chr18	3879131	3879132	CGI-N-Shore	CGI-Shore	TRUE	TRUE	FALSE	3.23534	4.03877	0.896761	0.941489
cg00044299	284252	KCTD1	chr18	24126361	24126362	CGI-N-Shore	CGI-Shore	FALSE	TRUE	FALSE	3.04043	3.79091	0.879766	0.930917
cg00045607	257106	ARHGAP30	chr1	161039690	161039691	Non-CGI	Non-CGI	TRUE	FALSE	FALSE	1.55893	2.24937	0.743436	0.818459
cg00045762	57451	TENM2	chr5	167181762	167181763	Non-CGI	Non-CGI	TRUE	TRUE	FALSE	0.0585449	0.910205	0.515328	0.646819
cg00045902	170394	PWWP2B	chr10	134222218	134222219	CGI	CGI	FALSE	TRUE	FALSE	1.232	2.39896	0.692478	0.821058
cg00046156	NA	NA	chr5	2109785	2109786	CGI-N-Shelf	CGI-Shelf	FALSE	FALSE	TRUE	-0.537047	0.497929	0.412556	0.582042
cg00046991	4642	MYO1D	chr17	30906423	30906424	Non-CGI	Non-CGI	FALSE	TRUE	FALSE	2.11122	3.11577	0.80613	0.888556
cg00047532	171558	PTCRA	chr6	42882406	42882407	CGI-S-Shelf	CGI-Shelf	TRUE	FALSE	FALSE	0.920221	1.65086	0.646045	0.751693
cg00047683	342372	PKD1L3	chr16	72034122	72034123	Non-CGI	Non-CGI	TRUE	FALSE	FALSE	1.45921	2.09546	0.726055	0.800728
cg00049729	NA	NA	chr5	55776345	55776346	CGI-N-Shore	CGI-Shore	FALSE	FALSE	TRUE	-1.49377	-0.555761	0.263506	0.409413
cg00049892	5167	ENPP1	chr6	132162773	132162774	Non-CGI	Non-CGI	FALSE	TRUE	FALSE	1.09557	2.44123	0.659144	0.805006
cg00050375	89845	ABCC10	chr6	43404828	43404829	Non-CGI	Non-CGI	FALSE	TRUE	FALSE	-0.500739	0.409687	0.4151	0.566881
cg00052385	6482	ST3GAL1	chr8	134580580	134580581	CGI-N-Shore	CGI-Shore	FALSE	TRUE	FALSE	-0.8697	0.361438	0.356404	0.554911
cg00052665	8522	GAS7	chr17	9941095	9941096	Non-CGI	Non-CGI	TRUE	TRUE	FALSE	0.948429	2.40587	0.653078	0.835589
cg00054210	9420	CYP7B1	chr8	65711644	65711645	CGI	CGI	TRUE	FALSE	FALSE	-0.66999	0.136378	0.395095	0.524907
cg00055073	NA	NA	chr2	43398118	43398119	Non-CGI	Non-CGI	FALSE	FALSE	TRUE	2.53549	3.60753	0.835143	0.918569
cg00055359	344148	NCKAP5	chr2	134023210	134023211	CGI-N-Shore	CGI-Shore	TRUE	TRUE	FALSE	-1.69844	-0.282878	0.242201	0.450392
cg00056257	2917	GRM7	chr3	6901652	6901653	CGI-N-Shore	CGI-Shore	TRUE	FALSE	FALSE	0.227728	1.21119	0.540504	0.689361
cg00059246	3229	HOXC13	chr12	54337929	54337930	CGI-N-Shore	CGI-Shore	FALSE	TRUE	FALSE	-0.601688	0.257694	0.403455	0.542742
cg00059707	NA	NA	chr10	2540911	2540912	CGI-N-Shelf	CGI-Shelf	FALSE	FALSE	TRUE	-0.135489	0.810871	0.478472	0.627722
cg00059737	55187	VPS13D	chr1	12400434	12400435	Non-CGI	Non-CGI	FALSE	TRUE	FALSE	-1.05404	2.3799	0.328538	0.792856
cg00060484	NA	NA	chr4	3287598	3287599	CGI	CGI	FALSE	FALSE	TRUE	-2.16318	0.631758	0.183886	0.601375
cg00060800	NA	NA	chr5	141600994	141600995	Non-CGI	Non-CGI	FALSE	FALSE	TRUE	1.02621	2.31407	0.666746	0.824524
cg00061678	NA	NA	chr1	170776719	170776720	Non-CGI	Non-CGI	FALSE	FALSE	TRUE	1.50481	2.72704	0.727011	0.845915
cg00062020	439927	C1orf180	chr1	85100819	85100820	Non-CGI	Non-CGI	TRUE	FALSE	FALSE	1.26857	2.19748	0.702905	0.815332
cg00066239	NA	NA	chr17	78472159	78472160	CGI	CGI	FALSE	FALSE	TRUE	-1.84692	-0.814123	0.219951	0.373931
cg00067588	NA	NA	chr10	10561707	10561708	Non-CGI	Non-CGI	FALSE	FALSE	TRUE	1.5482	2.92894	0.739487	0.874007
cg00068102	2736	GLI2	chr2	121619261	121619262	Non-CGI	Non-CGI	FALSE	TRUE	FALSE	1.13975	2.43661	0.68213	0.817111
cg00070042	NA	NA	chr9	133308594	133308595	CGI	CGI	FALSE	TRUE	FALSE	-1.68715	-0.382829	0.239653	0.446709
cg00070383	NA	NA	chr4	174429374	174429375	CGI	CGI	FALSE	FALSE	TRUE	1.28372	2.70187	0.707229	0.850354
cg00071051	347734	SLC35B2	chr6	44222845	44222846	CGI-N-Shore	CGI-Shore	TRUE	TRUE	FALSE	-0.723848	0.320236	0.38147	0.55151
cg00071051	100616124	MIR4647	chr6	44222845	44222846	CGI-N-Shore	CGI-Shore	TRUE	TRUE	FALSE	-0.723848	0.320236	0.38147	0.55151
cg00071618	57338	JPH3	chr16	87645667	87645668	CGI-N-Shelf	CGI-Shelf	FALSE	TRUE	FALSE	1.58711	2.56171	0.742364	0.85255
cg00071984	2272	FHIT	chr3	60617504	60617505	Non-CGI	Non-CGI	FALSE	TRUE	FALSE	0.00184136	2.12207	0.49496	0.763386
cg00072689	3216	HOXB6	chr17	46681111	46681112	CGI-S-Shore	CGI-Shore	FALSE	TRUE	FALSE	-2.48444	-1.36254	0.162652	0.289306
cg00072689	404266	HOXB-AS3	chr17	46681111	46681112	CGI-S-Shore	CGI-Shore	FALSE	TRUE	FALSE	-2.48444	-1.36254	0.162652	0.289306
cg00078759	9742	IFT140	chr16	1600969	1600970	CGI	CGI	FALSE	TRUE	FALSE	1.35106	2.65327	0.702755	0.81999
cg00078759	79652	TMEM204	chr16	1600969	1600970	CGI	CGI	FALSE	TRUE	FALSE	1.35106	2.65327	0.702755	0.81999
cg00080125	388407	C17orf82	chr17	59490613	59490614	CGI-S-Shore	CGI-Shore	TRUE	FALSE	FALSE	-0.272504	0.968689	0.453474	0.640596
cg00080987	NA	NA	chr3	126937362	126937363	Non-CGI	Non-CGI	FALSE	FALSE	TRUE	0.471517	1.1674	0.579991	0.684066
cg00083042	57608	KIAA1462	chr10	30404617	30404618	Non-CGI	Non-CGI	TRUE	FALSE	FALSE	-0.795075	1.53275	0.369705	0.72301
cg00083072	6494	SIPA1	chr11	65415190	65415191	CGI	CGI	TRUE	TRUE	FALSE	1.1919	1.9403	0.688978	0.774747
cg00083072	100616284	MIR4489	chr11	65415190	65415191	CGI	CGI	TRUE	TRUE	FALSE	1.1919	1.9403	0.688978	0.774747
cg00083188	3778	KCNMA1	chr10	79314844	79314845	Non-CGI	Non-CGI	FALSE	TRUE	FALSE	1.99957	2.94884	0.790739	0.865985
cg00083993	5521	PPP2R2B	chr5	146133678	146133679	Non-CGI	Non-CGI	FALSE	TRUE	FALSE	1.27087	2.0479	0.696388	0.79345
cg00084338	28514	DLL1	chr6	170595920	170595921	CGI	CGI	FALSE	TRUE	FALSE	-0.683554	0.728577	0.391033	0.590101
cg00084643	51808	PHAX	chr5	125936116	125936117	CGI-N-Shore	CGI-Shore	TRUE	FALSE	FALSE	0.83313	1.94367	0.632735	0.776848
cg00085416	27067	STAU2	chr8	74660265	74660266	CGI	CGI	TRUE	FALSE	FALSE	0.861759	1.54544	0.6398	0.742837
cg00086426	NA	NA	chr16	10934373	10934374	CGI-N-Shore	CGI-Shore	FALSE	FALSE	TRUE	-0.536169	1.53595	0.409384	0.73371
cg00086429	8828	NRP2	chr2	206566025	206566026	Non-CGI	Non-CGI	FALSE	TRUE	FALSE	0.0917207	1.00491	0.515714	0.658522
cg00088080	55509	BATF3	chr1	212861809	212861810	Non-CGI	Non-CGI	FALSE	TRUE	FALSE	0.0937947	1.95533	0.516111	0.782971
cg00088464	2815	GP9	chr3	128780893	128780894	CGI-N-Shore	CGI-Shore	TRUE	TRUE	FALSE	1.18624	2.62892	0.689071	0.830255
cg00089486	6474	SHOX2	chr3	157816330	157816331	CGI-S-Shore	CGI-Shore	FALSE	TRUE	FALSE	-1.63175	0.083226	0.248796	0.515993
cg00091146	619343	ERICH1-AS1	chr8	1050972	1050973	CGI-S-Shore	CGI-Shore	FALSE	TRUE	FALSE	1.86154	2.87585	0.772657	0.876246
cg00096447	NA	NA	chr5	137576708	137576709	CGI-N-Shore	CGI-Shore	FALSE	FALSE	TRUE	0.553695	1.42364	0.592965	0.723094
cg00098304	NA	NA	chr15	93579369	93579370	CGI	CGI	FALSE	FALSE	TRUE	0.136313	1.46121	0.522853	0.708584
cg00101457	10659	CELF2	chr10	11246612	11246613	CGI	CGI	FALSE	TRUE	FALSE	-0.777251	1.9833	0.373201	0.777055
cg00101713	6447	SCG5	chr15	32984867	32984868	Non-CGI	Non-CGI	FALSE	TRUE	FALSE	2.396	3.16305	0.83161	0.88505
cg00101715	91775	NXPE3	chr3	101497475	101497476	CGI-N-Shore	CGI-Shore	TRUE	FALSE	FALSE	-1.78653	-0.549244	0.227126	0.412875
cg00103299	NA	NA	chr15	93362247	93362248	CGI-N-Shore	CGI-Shore	FALSE	FALSE	TRUE	-0.227965	0.937842	0.463577	0.632296
cg00107630	23245	ASTN2	chr9	120174408	120174409	CGI-N-Shore	CGI-Shore	FALSE	TRUE	FALSE	-1.60006	-0.809829	0.252309	0.371539
cg00107982	114794	ELFN2	chr22	37813098	37813099	CGI-N-Shelf	CGI-Shelf	FALSE	TRUE	FALSE	-2.79974	-0.169991	0.127264	0.478332
cg00110171	4772	NFATC1	chr18	77179806	77179807	CGI-S-Shore	CGI-Shore	FALSE	TRUE	FALSE	3.10226	3.94894	0.889103	0.937872
cg00111826	NA	NA	chr5	7983865	7983866	CGI-S-Shore	CGI-Shore	FALSE	FALSE	TRUE	0.606843	1.26361	0.599771	0.700342
cg00113663	NA	NA	chr5	82243	82244	CGI-N-Shore	CGI-Shore	FALSE	FALSE	TRUE	-1.93168	-0.160625	0.210431	0.47671
cg00114346	10049	DNAJB6	chr7	157207886	157207887	CGI-S-Shore	CGI-Shore	FALSE	TRUE	FALSE	1.2277	2.38487	0.689666	0.803626
cg00114478	9312	KCNB2	chr8	73658110	73658111	Non-CGI	Non-CGI	FALSE	TRUE	FALSE	-1.36975	-0.291577	0.284897	0.451974
cg00115178	57118	CAMK1D	chr10	12648176	12648177	CGI	CGI	FALSE	TRUE	FALSE	-2.17667	0.232032	0.206293	0.539282
cg00116430	8412	BCAR3	chr1	94188268	94188269	Non-CGI	Non-CGI	FALSE	TRUE	FALSE	-1.16915	1.59849	0.310248	0.731417
cg00118507	4343	MOV10	chr1	113215934	113215935	CGI-N-Shore	CGI-Shore	TRUE	FALSE	FALSE	-0.552749	1.15619	0.406489	0.667312
cg00119127	NA	NA	chr7	1422999	1423000	CGI	CGI	FALSE	FALSE	TRUE	-0.399532	0.360316	0.433546	0.555887
cg00120254	6196	RPS6KA2	chr6	166868904	166868905	CGI	CGI	FALSE	TRUE	FALSE	2.75353	3.41203	0.862735	0.906481
cg00121876	NA	NA	chr6	166251659	166251660	Non-CGI	Non-CGI	FALSE	TRUE	FALSE	-1.56825	1.03228	0.254819	0.653934
cg00122765	4763	NF1	chr17	29457918	29457919	Non-CGI	Non-CGI	FALSE	TRUE	FALSE	-1.78327	-0.558435	0.2264	0.409109
cg00122944	5209	PFKFB3	chr10	6227266	6227267	Non-CGI	Non-CGI	FALSE	TRUE	FALSE	0.446755	1.20682	0.575125	0.688707
cg00124095	NA	NA	chr3	72305082	72305083	Non-CGI	Non-CGI	FALSE	FALSE	TRUE	-1.09256	0.956914	0.320866	0.643314
cg00128057	NA	NA	chr5	38134954	38134955	CGI	CGI	FALSE	FALSE	TRUE	1.8214	2.57697	0.768377	0.842291
cg00130947	3908	LAMA2	chr6	129677367	129677368	Non-CGI	Non-CGI	FALSE	TRUE	FALSE	1.16723	2.25611	0.687582	0.817929
cg00132255	NA	NA	chr1	214152076	214152077	CGI-N-Shore	CGI-Shore	FALSE	FALSE	TRUE	-1.21665	-0.547169	0.305285	0.413129
cg00134934	NA	NA	chr16	20271668	20271669	Non-CGI	Non-CGI	FALSE	FALSE	TRUE	0.0158696	2.47844	0.501948	0.837562
cg00135497	NA	NA	chr4	155661849	155661850	CGI	CGI	FALSE	TRUE	FALSE	0.15013	1.24895	0.520008	0.694069
cg00135888	406919	MIR130A	chr11	57407543	57407544	CGI-S-Shore	CGI-Shore	TRUE	TRUE	FALSE	-1.49765	-0.436819	0.263416	0.426912
cg00137696	27044	SND1	chr7	127703101	127703102	Non-CGI	Non-CGI	FALSE	TRUE	FALSE	1.38583	2.96861	0.712314	0.869651
cg00139496	55830	GLT8D1	chr3	52731124	52731125	Non-CGI	Non-CGI	FALSE	TRUE	FALSE	0.76769	2.50896	0.62131	0.83119
cg00140112	201477	DLGAP1-AS3	chr18	3879595	3879596	CGI	CGI	TRUE	TRUE	FALSE	1.6973	2.38087	0.758977	0.8349
cg00140112	9229	DLGAP1	chr18	3879595	3879596	CGI	CGI	TRUE	TRUE	FALSE	1.6973	2.38087	0.758977	0.8349
cg00143527	59274	MESDC1	chr15	81292171	81292172	CGI-N-Shore	CGI-Shore	TRUE	FALSE	FALSE	1.41566	2.76124	0.71872	0.852914
cg00145093	NA	NA	chr10	11027947	11027948	Non-CGI	Non-CGI	FALSE	FALSE	TRUE	2.66761	3.44066	0.861149	0.91469
cg00147286	92154	MTSS1L	chr16	70713933	70713934	CGI	CGI	TRUE	TRUE	FALSE	0.547577	1.88447	0.590052	0.771622
cg00147788	NA	NA	chr6	125855365	125855366	CGI	CGI	FALSE	FALSE	TRUE	-2.14413	-1.19693	0.189081	0.316123
cg00148223	NA	NA	chr5	957913	957914	CGI-S-Shore	CGI-Shore	FALSE	FALSE	TRUE	-2.50563	1.05205	0.151948	0.656941
cg00148892	2627	GATA6	chr18	19780878	19780879	CGI	CGI	FALSE	TRUE	FALSE	3.23285	4.19877	0.895245	0.946249
cg00150785	NA	NA	chr20	25581368	25581369	CGI-N-Shore	CGI-Shore	FALSE	FALSE	TRUE	-0.949843	1.11689	0.342473	0.655706
cg00151251	91526	ANKRD44	chr2	198173194	198173195	CGI-N-Shore	CGI-Shore	FALSE	TRUE	FALSE	0.137208	1.52003	0.523336	0.718373
cg00153306	259236	TMIE	chr3	46741492	46741493	CGI-N-Shore	CGI-Shore	TRUE	FALSE	FALSE	-1.63914	-0.531648	0.253298	0.419428
cg00153693	400451	FAM174B	chr15	93249643	93249644	CGI-N-Shelf	CGI-Shelf	FALSE	TRUE	FALSE	0.847327	1.4827	0.637816	0.729147
cg00158442	NA	NA	chr12	133299889	133299890	CGI	CGI	FALSE	FALSE	TRUE	2.0093	3.11474	0.793676	0.886153
cg00160359	112	ADCY6	chr12	49178192	49178193	CGI-S-Shore	CGI-Shore	TRUE	TRUE	FALSE	1.19439	2.51437	0.69014	0.819136
cg00160388	NA	NA	chr16	14403425	14403426	Non-CGI	Non-CGI	TRUE	FALSE	FALSE	-2.89659	-0.354382	0.119031	0.449697
cg00161124	148641	SLC35F3	chr1	234366259	234366260	CGI-N-Shore	CGI-Shore	FALSE	TRUE	FALSE	-1.77488	-0.137854	0.236796	0.47955
cg00169111	55700	MAP7D1	chr1	36639894	36639895	CGI-N-Shore	CGI-Shore	FALSE	TRUE	FALSE	2.09806	2.8974	0.803252	0.870802
cg00174500	116173	CMTM5	chr14	23846479	23846480	Non-CGI	Non-CGI	TRUE	FALSE	FALSE	-1.33175	-0.690524	0.289232	0.387633
cg00175066	5987	TRIM27	chr6	28893092	28893093	CGI-S-Shore	CGI-Shore	TRUE	FALSE	FALSE	1.51323	2.84513	0.726736	0.849223
cg00176210	286	ANK1	chr8	41654967	41654968	CGI	CGI	FALSE	TRUE	FALSE	-0.238494	2.92986	0.459198	0.863577
cg00176657	NA	NA	chr1	205193809	205193810	CGI-N-Shelf	CGI-Shelf	FALSE	FALSE	TRUE	2.09078	2.8304	0.803158	0.862174
cg00178249	100192378	ZFHX4-AS1	chr8	77589908	77589909	CGI-N-Shore	CGI-Shore	FALSE	TRUE	FALSE	-2.92154	-0.733358	0.11854	0.383759
cg00178728	166647	GPR125	chr4	22516158	22516159	CGI-N-Shore	CGI-Shore	FALSE	TRUE	FALSE	-2.03991	-0.227932	0.197326	0.465171
cg00182256	NA	NA	chr22	49376518	49376519	CGI	CGI	FALSE	FALSE	TRUE	-0.57223	0.942734	0.405266	0.650478
cg00183468	NA	NA	chr3	142926178	142926179	Non-CGI	Non-CGI	FALSE	FALSE	TRUE	0.884268	2.18874	0.645064	0.79636
cg00184457	NA	NA	chr8	8946301	8946302	Non-CGI	Non-CGI	FALSE	FALSE	TRUE	-1.80629	-1.06259	0.232359	0.333633
cg00184732	342035	GLDN	chr15	51633821	51633822	CGI	CGI	TRUE	FALSE	FALSE	-2.28566	-0.877181	0.171332	0.367844
cg00185867	445347	TARP	chr7	38348929	38348930	CGI-N-Shelf	CGI-Shelf	FALSE	TRUE	FALSE	0.482864	2.58989	0.578269	0.84179
cg00186909	440107	PLEKHG7	chr12	93129288	93129289	Non-CGI	Non-CGI	TRUE	FALSE	FALSE	-2.47175	-1.80401	0.154445	0.234706
cg00187557	NA	NA	chr5	139081136	139081137	Non-CGI	Non-CGI	FALSE	FALSE	TRUE	0.386755	1.24635	0.565612	0.695505
cg00188627	29970	SCHIP1	chr3	159557779	159557780	CGI-N-Shore	CGI-Shore	TRUE	TRUE	FALSE	2.39162	3.39012	0.831941	0.896193
cg00188627	100505385	IQCJ-SCHIP1	chr3	159557779	159557780	CGI-N-Shore	CGI-Shore	TRUE	TRUE	FALSE	2.39162	3.39012	0.831941	0.896193
cg00188704	3199	HOXA2	chr7	27140797	27140798	CGI-S-Shore	CGI-Shore	TRUE	TRUE	FALSE	1.13171	3.70767	0.665779	0.922555
cg00192031	64759	TNS3	chr7	47620790	47620791	CGI-N-Shore	CGI-Shore	FALSE	TRUE	FALSE	-2.23145	-0.0649102	0.176414	0.49147
cg00192220	NA	NA	chr16	48570215	48570216	Non-CGI	Non-CGI	FALSE	FALSE	TRUE	-1.23082	-0.252509	0.300141	0.457884
cg00193959	1793	DOCK1	chr10	129232405	129232406	Non-CGI	Non-CGI	FALSE	TRUE	FALSE	-0.961698	2.3176	0.342024	0.794515
cg00197006	23406	COTL1	chr16	84616559	84616560	Non-CGI	Non-CGI	FALSE	TRUE	FALSE	0.471926	2.21629	0.576544	0.810576
cg00197322	8379	MAD1L1	chr7	1990554	1990555	CGI-S-Shore	CGI-Shore	FALSE	TRUE	FALSE	2.3582	3.28434	0.82333	0.896686
cg00197373	285659	OR2V2	chr5	180581937	180581938	Non-CGI	Non-CGI	TRUE	FALSE	FALSE	1.5876	2.25648	0.74323	0.822224
cg00197993	NA	NA	chr6	1201056	1201057	Non-CGI	Non-CGI	FALSE	FALSE	TRUE	-0.616308	0.536746	0.412312	0.588144
cg00199399	NA	NA	chr8	49304043	49304044	Non-CGI	Non-CGI	FALSE	FALSE	TRUE	3.01703	3.87416	0.886324	0.935647
cg00202190	NA	NA	chr7	148333974	148333975	CGI-N-Shore	CGI-Shore	FALSE	FALSE	TRUE	2.61526	3.48617	0.844008	0.915134
cg00202460	123207	C15orf40	chr15	83680873	83680874	CGI-S-Shore	CGI-Shore	TRUE	FALSE	FALSE	0.991476	1.99069	0.660341	0.788709
cg00203037	23180	RFTN1	chr3	16360321	16360322	Non-CGI	Non-CGI	FALSE	TRUE	FALSE	2.00801	3.50387	0.796808	0.915572
cg00203037	92106	OXNAD1	chr3	16360321	16360322	Non-CGI	Non-CGI	FALSE	TRUE	FALSE	2.00801	3.50387	0.796808	0.915572
cg00203564	NA	NA	chr3	176133845	176133846	Non-CGI	Non-CGI	FALSE	FALSE	TRUE	2.03565	2.81639	0.801003	0.866008
cg00204748	55711	FAR2	chr12	29376779	29376780	Non-CGI	Non-CGI	TRUE	TRUE	FALSE	1.94865	3.06706	0.784384	0.886237
cg00206468	NA	NA	chr16	85990019	85990020	CGI-N-Shore	CGI-Shore	FALSE	FALSE	TRUE	1.09217	2.03364	0.678247	0.798338
cg00210271	NA	NA	chr12	54088934	54088935	CGI	CGI	FALSE	FALSE	TRUE	2.74511	3.44721	0.856403	0.913972
cg00212114	257160	RNF214	chr11	117144714	117144715	Non-CGI	Non-CGI	FALSE	TRUE	FALSE	-0.915446	1.14958	0.351139	0.677652
cg00212979	10938	EHD1	chr11	64647505	64647506	CGI-S-Shore	CGI-Shore	TRUE	FALSE	FALSE	1.15787	1.89879	0.682383	0.774631
cg00213080	9265	CYTH3	chr7	6204521	6204522	CGI	CGI	FALSE	TRUE	FALSE	2.36159	3.00722	0.832525	0.885808
cg00215017	NA	NA	chr10	134818683	134818684	CGI-N-Shore	CGI-Shore	FALSE	FALSE	TRUE	1.68174	2.47192	0.747848	0.840875
cg00215432	494324	MIR375	chr2	219866437	219866438	CGI	CGI	TRUE	FALSE	FALSE	-2.78418	-2.03595	0.130859	0.209167
cg00215432	100129175	LOC100129175	chr2	219866437	219866438	CGI	CGI	TRUE	FALSE	FALSE	-2.78418	-2.03595	0.130859	0.209167
cg00215587	7681	MKRN3	chr15	23810843	23810844	CGI	CGI	TRUE	FALSE	FALSE	1.06831	2.98919	0.67448	0.874103
cg00215902	399959	MIR100HG	chr11	122198071	122198072	Non-CGI	Non-CGI	FALSE	TRUE	FALSE	1.35172	2.2609	0.707701	0.812024
cg00218404	23255	SOGA2	chr18	8781983	8781984	CGI-N-Shore	CGI-Shore	TRUE	TRUE	FALSE	1.56906	2.4217	0.742064	0.835298
cg00219321	NA	NA	chr5	153318647	153318648	Non-CGI	Non-CGI	FALSE	FALSE	TRUE	2.8563	3.47693	0.873169	0.912637
cg00220661	284276	LINC00908	chr18	74241269	74241270	CGI	CGI	FALSE	TRUE	FALSE	-1.75817	-0.547243	0.230805	0.414378
cg00221745	5662	PSD	chr10	104179478	104179479	CGI	CGI	TRUE	TRUE	FALSE	-2.77039	-2.10886	0.13025	0.198709
cg00221745	79176	FBXL15	chr10	104179478	104179479	CGI	CGI	TRUE	TRUE	FALSE	-2.77039	-2.10886	0.13025	0.198709
cg00223046	8514	KCNAB2	chr1	6130188	6130189	CGI-N-Shore	CGI-Shore	FALSE	TRUE	FALSE	0.384062	1.4473	0.561379	0.72561
cg00223767	7405	UVRAG	chr11	75831715	75831716	Non-CGI	Non-CGI	FALSE	TRUE	FALSE	0.337803	1.41639	0.557213	0.710713
cg00224929	2571	GAD1	chr2	171705463	171705464	Non-CGI	Non-CGI	TRUE	TRUE	FALSE	0.58792	1.696	0.597686	0.748899
cg00225623	221178	SPATA13	chr13	24845891	24845892	Non-CGI	Non-CGI	FALSE	TRUE	FALSE	-2.3001	0.43177	0.169691	0.564136
cg00225902	26018	LRIG1	chr3	66444122	66444123	Non-CGI	Non-CGI	FALSE	TRUE	FALSE	-1.83454	-0.678585	0.221348	0.391083
cg00226689	NA	NA	chr7	41259421	41259422	Non-CGI	Non-CGI	FALSE	FALSE	TRUE	1.43074	2.46376	0.722231	0.83579
cg00228240	100131176	WDR86-AS1	chr7	151104588	151104589	CGI-N-Shore	CGI-Shore	TRUE	TRUE	FALSE	2.63528	3.50187	0.852846	0.915317
cg00228240	349136	WDR86	chr7	151104588	151104589	CGI-N-Shore	CGI-Shore	TRUE	TRUE	FALSE	2.63528	3.50187	0.852846	0.915317
cg00230502	160777	CCDC60	chr12	119772381	119772382	CGI-N-Shore	CGI-Shore	TRUE	FALSE	FALSE	-2.22239	-1.58586	0.178164	0.259502
cg00230584	NA	NA	chr5	97833812	97833813	Non-CGI	Non-CGI	FALSE	FALSE	TRUE	2.04454	2.96772	0.785594	0.879732
cg00232092	80028	FBXL18	chr7	5518887	5518888	CGI-S-Shore	CGI-Shore	FALSE	TRUE	FALSE	2.692	4.05355	0.85762	0.941001
cg00232827	54492	NEURL1B	chr5	172096764	172096765	CGI-N-Shore	CGI-Shore	FALSE	TRUE	FALSE	2.08506	2.72388	0.804203	0.863238
cg00233633	54504	CPVL	chr7	29153560	29153561	Non-CGI	Non-CGI	FALSE	TRUE	FALSE	0.38879	1.24695	0.565778	0.693512
cg00234046	64072	CDH23	chr10	73169245	73169246	Non-CGI	Non-CGI	FALSE	TRUE	FALSE	1.13064	2.77934	0.679686	0.868255
cg00234261	349136	WDR86	chr7	151106082	151106083	CGI-N-Shore	CGI-Shore	TRUE	TRUE	FALSE	-2.14348	-0.717128	0.188902	0.383004
cg00234261	100131176	WDR86-AS1	chr7	151106082	151106083	CGI-N-Shore	CGI-Shore	TRUE	TRUE	FALSE	-2.14348	-0.717128	0.188902	0.383004
cg00238353	5791	PTPRE	chr10	129785537	129785538	Non-CGI	Non-CGI	TRUE	TRUE	FALSE	1.3026	2.55625	0.706543	0.842596
cg00239835	5138	PDE2A	chr11	72379867	72379868	Non-CGI	Non-CGI	FALSE	TRUE	FALSE	-1.96141	-1.33574	0.2106	0.292415
cg00240732	64409	WBSCR17	chr7	70923396	70923397	Non-CGI	Non-CGI	FALSE	TRUE	FALSE	-0.203346	0.901949	0.466549	0.633858
cg00240860	9665	KIAA0430	chr16	15702420	15702421	Non-CGI	Non-CGI	FALSE	TRUE	FALSE	-0.504793	0.652718	0.415	0.606694
cg00241281	2972	BRF1	chr14	105779794	105779795	CGI-N-Shore	CGI-Shore	TRUE	TRUE	FALSE	2.66222	3.43019	0.857035	0.910828
cg00241281	23241	PACS2	chr14	105779794	105779795	CGI-N-Shore	CGI-Shore	TRUE	TRUE	FALSE	2.66222	3.43019	0.857035	0.910828
cg00242020	137362	GOT1L1	chr8	37797632	37797633	Non-CGI	Non-CGI	TRUE	FALSE	FALSE	-0.550172	0.806832	0.411096	0.628304
cg00242035	91252	SLC39A13	chr11	47416358	47416359	CGI-N-Shore	CGI-Shore	FALSE	TRUE	FALSE	0.851309	3.13687	0.638281	0.892686
cg00242627	4914	NTRK1	chr1	156815187	156815188	CGI-S-Shore	CGI-Shore	FALSE	TRUE	FALSE	-2.31774	-1.02313	0.176504	0.345899
cg00242627	3645	INSRR	chr1	156815187	156815188	CGI-S-Shore	CGI-Shore	FALSE	TRUE	FALSE	-2.31774	-1.02313	0.176504	0.345899
cg00244001	9679	FAM53B	chr10	126336805	126336806	Non-CGI	Non-CGI	FALSE	TRUE	FALSE	-0.472998	0.907096	0.422217	0.630957
cg00245778	64222	TOR3A	chr1	179064635	179064636	Non-CGI	Non-CGI	FALSE	TRUE	FALSE	1.85773	2.91415	0.781377	0.879123
cg00245856	23263	MCF2L	chr13	113707783	113707784	CGI	CGI	FALSE	TRUE	FALSE	1.27659	2.40799	0.698813	0.835796
cg00245896	84448	ABLIM2	chr4	8034100	8034101	CGI-N-Shore	CGI-Shore	FALSE	TRUE	FALSE	0.0571525	2.41367	0.511708	0.814898
cg00249621	85453	TSPYL5	chr8	98290359	98290360	CGI	CGI	TRUE	FALSE	FALSE	-0.944474	-0.300474	0.346254	0.449394
cg00250454	8787	RGS9	chr17	63181565	63181566	Non-CGI	Non-CGI	FALSE	TRUE	FALSE	2.51938	3.3104	0.836939	0.89729
cg00252472	NA	NA	chr6	150739173	150739174	Non-CGI	Non-CGI	FALSE	FALSE	TRUE	-2.4064	-1.33003	0.16036	0.297182
cg00253171	51741	WWOX	chr16	78291326	78291327	Non-CGI	Non-CGI	FALSE	TRUE	FALSE	-0.0655889	2.49128	0.488044	0.83351
cg00253182	401491	FLJ35024	chr9	2619314	2619315	CGI-N-Shore	CGI-Shore	FALSE	TRUE	FALSE	2.12709	2.75609	0.808644	0.865944
cg00253564	57449	PLEKHG5	chr1	6552403	6552404	CGI-S-Shore	CGI-Shore	TRUE	TRUE	FALSE	1.26441	2.0061	0.697824	0.783905
cg00254714	7053	TGM3	chr20	2309923	2309924	CGI-S-Shore	CGI-Shore	FALSE	TRUE	FALSE	1.63924	2.56981	0.752942	0.850803
cg00255919	3659	IRF1	chr5	131827918	131827919	CGI-S-Shore	CGI-Shore	TRUE	TRUE	FALSE	2.31299	3.02325	0.820818	0.885519
cg00256081	2588	GALNS	chr16	88901299	88901300	CGI-N-Shore	CGI-Shore	FALSE	TRUE	FALSE	1.59498	2.84515	0.744876	0.850776
cg00257800	NA	NA	chr2	57938135	57938136	Non-CGI	Non-CGI	FALSE	FALSE	TRUE	-0.617544	0.0618853	0.399207	0.511251
cg00259886	4359	MPZ	chr1	161279762	161279763	CGI-S-Shelf	CGI-Shelf	TRUE	FALSE	FALSE	-1.55115	-0.909643	0.257495	0.352051
cg00260937	375616	KCP	chr7	128520193	128520194	Non-CGI	Non-CGI	FALSE	TRUE	FALSE	-2.84877	-2.08274	0.126692	0.214713
cg00262446	51705	EMCN	chr4	101439228	101439229	Non-CGI	Non-CGI	TRUE	FALSE	FALSE	-2.36496	-1.53429	0.164202	0.267024
cg00265360	NA	NA	chr17	1101278	1101279	CGI-N-Shelf	CGI-Shelf	FALSE	FALSE	TRUE	0.19768	1.38697	0.533771	0.711457
cg00266592	670	BPHL	chr6	3139627	3139628	CGI-N-Shore	CGI-Shore	FALSE	TRUE	FALSE	-0.515338	0.474947	0.418015	0.578002
cg00268476	54442	KCTD5	chr16	2740589	2740590	CGI-S-Shore	CGI-Shore	FALSE	TRUE	FALSE	0.00536684	2.25642	0.5009	0.793089
cg00268945	NA	NA	chr13	81229541	81229542	CGI-S-Shore	CGI-Shore	FALSE	FALSE	TRUE	2.39435	3.13714	0.82758	0.889963
cg00269140	2913	GRM3	chr7	86389542	86389543	Non-CGI	Non-CGI	FALSE	TRUE	FALSE	1.06335	1.72076	0.672222	0.762099
cg00269553	137902	PXDNL	chr8	52321814	52321815	CGI	CGI	TRUE	TRUE	FALSE	2.42875	3.22355	0.832801	0.891975
cg00273543	2259	FGF14	chr13	103055487	103055488	CGI-S-Shelf	CGI-Shelf	TRUE	FALSE	FALSE	1.23665	2.39522	0.696992	0.832676
cg00273657	100169752	LOC100169752	chr10	127262562	127262563	Non-CGI	Non-CGI	TRUE	FALSE	FALSE	1.47718	2.15523	0.729031	0.810017
cg00275449	23527	ACAP2	chr3	195162127	195162128	CGI-N-Shore	CGI-Shore	FALSE	TRUE	FALSE	0.381636	1.35729	0.564288	0.696147
cg00277714	100874059	LINC00297	chr13	30459305	30459306	Non-CGI	Non-CGI	FALSE	FALSE	TRUE	0.680814	1.30688	0.611775	0.708553
cg00278984	NA	NA	chr6	29203786	29203787	Non-CGI	Non-CGI	FALSE	FALSE	TRUE	-0.691844	0.144497	0.386515	0.525522
cg00281048	NA	NA	chr4	80573233	80573234	Non-CGI	Non-CGI	FALSE	FALSE	TRUE	-0.512146	2.64979	0.413271	0.855745
cg00282706	57101	ANO2	chr12	6055430	6055431	CGI-S-Shore	CGI-Shore	TRUE	FALSE	FALSE	-0.0744107	0.993816	0.490148	0.661087
cg00283857	79683	ZDHHC14	chr6	158018184	158018185	CGI	CGI	FALSE	TRUE	FALSE	2.69232	3.66086	0.860473	0.916077
cg00286773	9645	MICAL2	chr11	12207449	12207450	Non-CGI	Non-CGI	FALSE	TRUE	FALSE	-0.566613	0.831125	0.405514	0.600605
cg00286878	4232	MEST	chr7	130131633	130131634	CGI-S-Shore	CGI-Shore	TRUE	TRUE	FALSE	0.244081	1.3827	0.54182	0.721938
cg00286878	317751	MESTIT1	chr7	130131633	130131634	CGI-S-Shore	CGI-Shore	TRUE	TRUE	FALSE	0.244081	1.3827	0.54182	0.721938
cg00287773	84418	CYSTM1	chr5	139594619	139594620	Non-CGI	Non-CGI	FALSE	TRUE	FALSE	-1.78619	-0.104276	0.227663	0.484961
cg00289503	1299	COL9A3	chr20	61470028	61470029	CGI-S-Shore	CGI-Shore	FALSE	TRUE	FALSE	0.554869	1.22112	0.592828	0.693526
cg00290303	NA	NA	chr7	105946464	105946465	Non-CGI	Non-CGI	FALSE	FALSE	TRUE	0.122481	0.902162	0.521178	0.644385
cg00292071	8379	MAD1L1	chr7	2248948	2248949	CGI-N-Shore	CGI-Shore	FALSE	TRUE	FALSE	-0.887005	0.461466	0.353256	0.569419
cg00292107	65108	MARCKSL1	chr1	32800350	32800351	CGI-N-Shore	CGI-Shore	FALSE	TRUE	FALSE	1.38845	2.23287	0.716147	0.817807
cg00292135	129790	C7orf13	chr7	156433068	156433069	CGI	CGI	TRUE	TRUE	FALSE	-3.13753	-2.44482	0.104193	0.162322
cg00292135	140545	RNF32	chr7	156433068	156433069	CGI	CGI	TRUE	TRUE	FALSE	-3.13753	-2.44482	0.104193	0.162322
cg00294025	83758	RBP5	chr12	7276360	7276361	Non-CGI	Non-CGI	FALSE	TRUE	FALSE	3.01866	4.10241	0.885365	0.944649
cg00295293	56704	JPH1	chr8	75234615	75234616	CGI-S-Shore	CGI-Shore	TRUE	FALSE	FALSE	0.511665	1.44697	0.585647	0.719537
cg00297966	286053	NSMCE2	chr8	126186709	126186710	Non-CGI	Non-CGI	FALSE	TRUE	FALSE	0.679231	1.39457	0.611154	0.715623
cg00298919	NA	NA	chr16	86421796	86421797	CGI-N-Shore	CGI-Shore	FALSE	FALSE	TRUE	2.21806	3.19078	0.818988	0.894564
cg00299820	NA	NA	chr1	11943154	11943155	Non-CGI	Non-CGI	FALSE	FALSE	TRUE	-1.40531	0.114664	0.280681	0.519565
cg00299893	79705	LRRK1	chr15	101609726	101609727	CGI-S-Shelf	CGI-Shelf	FALSE	TRUE	FALSE	-0.827467	1.5884	0.36219	0.743709
cg00300275	783	CACNB2	chr10	18828426	18828427	CGI	CGI	FALSE	TRUE	FALSE	1.22953	2.54308	0.693604	0.829341
cg00300672	129684	CNTNAP5	chr2	125077436	125077437	Non-CGI	Non-CGI	FALSE	TRUE	FALSE	-1.72032	-0.813252	0.236833	0.370581
cg00301396	NA	NA	chr16	30572929	30572930	CGI	CGI	FALSE	FALSE	TRUE	-1.45234	-0.431737	0.28038	0.428559
cg00301902	492307	C8orf22	chr8	49983488	49983489	Non-CGI	Non-CGI	TRUE	FALSE	FALSE	1.43828	2.07687	0.72314	0.797681
cg00302479	23550	PSD4	chr2	113931538	113931539	Non-CGI	Non-CGI	TRUE	FALSE	FALSE	0.906057	2.19678	0.642697	0.815308
cg00302587	8031	NCOA4	chr10	51576241	51576242	CGI-S-Shelf	CGI-Shelf	TRUE	TRUE	FALSE	2.52789	3.39127	0.843055	0.905665
cg00302587	8505	PARG	chr10	51576241	51576242	CGI-S-Shelf	CGI-Shelf	TRUE	TRUE	FALSE	2.52789	3.39127	0.843055	0.905665
cg00304076	405	ARNT	chr1	150804339	150804340	Non-CGI	Non-CGI	FALSE	TRUE	FALSE	2.67378	3.28856	0.855481	0.903661
cg00304185	64788	LMF1	chr16	1033074	1033075	CGI	CGI	TRUE	TRUE	FALSE	-1.82236	-0.448222	0.224648	0.433513
cg00304185	30812	SOX8	chr16	1033074	1033075	CGI	CGI	TRUE	TRUE	FALSE	-1.82236	-0.448222	0.224648	0.433513
cg00306838	NA	NA	chr1	163393099	163393100	CGI-S-Shore	CGI-Shore	FALSE	FALSE	TRUE	-0.118594	1.35764	0.480224	0.714693
cg00308503	23120	ATP10B	chr5	160171384	160171385	Non-CGI	Non-CGI	FALSE	TRUE	FALSE	-0.350669	0.515476	0.446208	0.585143
cg00308914	NA	NA	chr5	17436715	17436716	Non-CGI	Non-CGI	FALSE	FALSE	TRUE	-0.243675	0.537622	0.459587	0.589282
cg00310412	8482	SEMA7A	chr15	74724918	74724919	CGI-N-Shore	CGI-Shore	FALSE	TRUE	FALSE	-1.05508	-0.29539	0.332205	0.454351
cg00310968	200162	SPAG17	chr1	118727904	118727905	CGI	CGI	TRUE	FALSE	FALSE	-2.93427	-2.2652	0.117355	0.176661
cg00311984	84875	PARP10	chr8	145051668	145051669	CGI	CGI	TRUE	TRUE	FALSE	0.368	1.09981	0.561293	0.672053
cg00311984	5339	PLEC	chr8	145051668	145051669	CGI	CGI	TRUE	TRUE	FALSE	0.368	1.09981	0.561293	0.672053
cg00312508	NA	NA	chr10	85322997	85322998	CGI-N-Shore	CGI-Shore	FALSE	FALSE	TRUE	0.982444	1.8471	0.660882	0.773343
cg00313094	9420	CYP7B1	chr8	65603587	65603588	Non-CGI	Non-CGI	FALSE	TRUE	FALSE	-1.34324	0.273197	0.289865	0.545296
cg00313722	91304	TMEM259	chr19	1009949	1009950	CGI	CGI	TRUE	TRUE	FALSE	-0.208556	0.770197	0.464243	0.620864
cg00315853	79148	MMP28	chr17	34105872	34105873	Non-CGI	Non-CGI	FALSE	TRUE	FALSE	0.0373956	1.18185	0.501772	0.685609
cg00317020	NA	NA	chr10	60933578	60933579	CGI-N-Shelf	CGI-Shelf	FALSE	FALSE	TRUE	-1.11903	0.35113	0.318923	0.55809
cg00317879	NA	NA	chr11	68920611	68920612	CGI	CGI	FALSE	FALSE	TRUE	1.81265	2.53	0.773088	0.837847
cg00318347	64641	EBF2	chr8	25812500	25812501	CGI	CGI	FALSE	TRUE	FALSE	3.31244	3.9997	0.901213	0.933823
cg00318347	5520	PPP2R2A	chr8	25812500	25812501	CGI	CGI	FALSE	TRUE	FALSE	3.31244	3.9997	0.901213	0.933823
cg00318621	NA	NA	chr2	106887213	106887214	CGI-S-Shore	CGI-Shore	FALSE	FALSE	TRUE	2.06425	2.75453	0.80135	0.867167
cg00318947	3200	HOXA3	chr7	27154914	27154915	CGI-S-Shore	CGI-Shore	FALSE	TRUE	FALSE	-0.389134	2.99608	0.435425	0.881969
cg00319692	245972	ATP6V0D2	chr8	87111119	87111120	Non-CGI	Non-CGI	TRUE	FALSE	FALSE	-0.0272956	0.950075	0.494227	0.649287
cg00320288	NA	NA	chr16	85863167	85863168	CGI-S-Shelf	CGI-Shelf	FALSE	FALSE	TRUE	2.94264	3.56762	0.879777	0.921033
cg00320539	23040	MYT1L	chr2	1983439	1983440	CGI	CGI	FALSE	TRUE	FALSE	1.12044	2.00711	0.67751	0.789
cg00321555	NA	NA	chr10	6779875	6779876	Non-CGI	Non-CGI	FALSE	FALSE	TRUE	0.111324	1.63229	0.51884	0.730997
cg00324520	NA	NA	chr15	41411926	41411927	CGI-S-Shelf	CGI-Shelf	FALSE	FALSE	TRUE	0.838291	2.02113	0.634336	0.7895
cg00324592	2339	FNTA	chr8	42914541	42914542	CGI-S-Shelf	CGI-Shelf	FALSE	TRUE	FALSE	-1.05929	0.552572	0.330349	0.579262
cg00325381	5797	PTPRM	chr18	8370160	8370161	CGI-S-Shelf	CGI-Shelf	FALSE	TRUE	FALSE	-0.672321	1.21689	0.386933	0.681701
cg00326231	8218	CLTCL1	chr22	19278249	19278250	CGI-N-Shore	CGI-Shore	FALSE	TRUE	FALSE	-1.98727	-0.298736	0.204059	0.450891
cg00327263	55240	STEAP3	chr2	120019111	120019112	CGI-N-Shore	CGI-Shore	FALSE	TRUE	FALSE	1.60151	2.9281	0.741048	0.874725
cg00327355	NA	NA	chr2	240884831	240884832	CGI	CGI	FALSE	FALSE	TRUE	-0.0665361	1.41727	0.488219	0.701599
cg00327524	389692	MAFA	chr8	144510753	144510754	CGI-S-Shore	CGI-Shore	TRUE	FALSE	FALSE	-1.79663	-0.988496	0.227944	0.345354
cg00327697	NA	NA	chr8	24076220	24076221	Non-CGI	Non-CGI	FALSE	FALSE	TRUE	-2.25043	-0.993927	0.178553	0.350155
cg00327772	79696	ZC2HC1C	chr14	75535155	75535156	CGI-N-Shore	CGI-Shore	TRUE	FALSE	FALSE	0.249275	1.23706	0.538222	0.69079
cg00328523	51606	ATP6V1H	chr8	54641642	54641643	Non-CGI	Non-CGI	FALSE	TRUE	FALSE	0.526956	1.88666	0.587164	0.760178
cg00328597	88	ACTN2	chr1	236915027	236915028	CGI	CGI	FALSE	TRUE	FALSE	1.05585	1.97927	0.667001	0.790532
cg00329618	1840	DTX1	chr12	113515439	113515440	CGI	CGI	FALSE	TRUE	FALSE	-1.01616	0.667534	0.333832	0.590418
cg00331677	6376	CX3CL1	chr16	57413484	57413485	CGI-N-Shelf	CGI-Shelf	FALSE	TRUE	FALSE	2.318	2.98255	0.827553	0.880498
cg00332048	9734	HDAC9	chr7	18535072	18535073	Non-CGI	Non-CGI	TRUE	TRUE	FALSE	-0.995636	0.42703	0.340154	0.573206
cg00332126	2132	EXT2	chr11	44251108	44251109	Non-CGI	Non-CGI	FALSE	TRUE	FALSE	0.882127	2.30063	0.64386	0.809875
cg00332146	54825	CDHR2	chr5	175975901	175975902	Non-CGI	Non-CGI	TRUE	TRUE	FALSE	-0.281738	0.985754	0.454474	0.657998
cg00332882	284788	LOC284788	chr20	22401271	22401272	Non-CGI	Non-CGI	TRUE	FALSE	FALSE	-0.545953	1.53429	0.410736	0.726337
cg00333870	NA	NA	chr7	51870809	51870810	CGI-N-Shelf	CGI-Shelf	FALSE	FALSE	TRUE	-0.0458218	0.622041	0.493687	0.605022
cg00334063	84107	ZIC4	chr3	147106010	147106011	CGI-N-Shore	CGI-Shore	FALSE	TRUE	FALSE	-0.117704	0.645613	0.482631	0.605449
cg00334274	150280	HORMAD2	chr22	30474915	30474916	CGI-N-Shore	CGI-Shore	TRUE	FALSE	FALSE	-1.1144	0.448409	0.318735	0.570851
cg00334507	552900	BOLA2	chr16	29824599	29824600	CGI-S-Shore	CGI-Shore	TRUE	TRUE	FALSE	-0.91145	0.232914	0.349548	0.539257
cg00334507	112476	PRRT2	chr16	29824599	29824600	CGI-S-Shore	CGI-Shore	TRUE	TRUE	FALSE	-0.91145	0.232914	0.349548	0.539257
cg00334821	3984	LIMK1	chr7	73508994	73508995	CGI	CGI	FALSE	TRUE	FALSE	-3.02279	-2.28386	0.110912	0.188454
cg00335715	NA	NA	chr5	90575459	90575460	CGI-N-Shore	CGI-Shore	FALSE	FALSE	TRUE	-0.533823	1.00666	0.414951	0.64932
cg00336220	23020	SNRNP200	chr2	96940284	96940285	Non-CGI	Non-CGI	FALSE	TRUE	FALSE	2.79756	3.51556	0.864848	0.913873
cg00337703	56165	TDRD1	chr10	115938729	115938730	CGI-N-Shore	CGI-Shore	TRUE	FALSE	FALSE	0.5527	1.54094	0.591688	0.739543
cg00338529	NA	NA	chr2	134948022	134948023	CGI-N-Shore	CGI-Shore	FALSE	FALSE	TRUE	1.41732	2.61916	0.722758	0.84997
cg00344445	2313	FLI1	chr11	128647107	128647108	CGI	CGI	FALSE	TRUE	FALSE	-0.962031	0.64835	0.349769	0.603666
cg00344482	23094	SIPA1L3	chr19	38658072	38658073	CGI-S-Shelf	CGI-Shelf	FALSE	TRUE	FALSE	1.71687	3.43262	0.754658	0.913716
cg00345344	NA	NA	chr16	88459714	88459715	CGI	CGI	FALSE	FALSE	TRUE	-0.223241	1.51895	0.46292	0.705675
cg00345704	730755	KRTAP2-3	chr17	39216495	39216496	Non-CGI	Non-CGI	TRUE	FALSE	FALSE	1.74276	2.40757	0.760498	0.836823
cg00349925	NA	NA	chr13	113553559	113553560	CGI	CGI	FALSE	FALSE	TRUE	-0.337363	1.45565	0.445675	0.715784
cg00350158	57689	LRRC4C	chr11	40713713	40713714	Non-CGI	Non-CGI	FALSE	TRUE	FALSE	0.379589	1.08149	0.560625	0.673654
cg00350478	79981	FRMD1	chr6	168480013	168480014	CGI-N-Shore	CGI-Shore	TRUE	FALSE	FALSE	-0.760727	0.476189	0.375097	0.579702
cg00351537	140467	ZNF358	chr19	7580275	7580276	CGI-N-Shore	CGI-Shore	TRUE	FALSE	FALSE	-1.25143	2.13733	0.301562	0.758942
cg00352872	201140	DHRS7C	chr17	9695137	9695138	Non-CGI	Non-CGI	TRUE	FALSE	FALSE	-0.943369	0.796096	0.348317	0.63103
cg00353353	5799	PTPRN2	chr7	157371980	157371981	CGI-S-Shore	CGI-Shore	FALSE	TRUE	FALSE	-1.34456	0.0810915	0.287623	0.515952
cg00353407	9826	ARHGEF11	chr1	156974025	156974026	Non-CGI	Non-CGI	FALSE	TRUE	FALSE	0.942872	2.48088	0.653964	0.811402
cg00354125	NA	NA	chr7	156889675	156889676	CGI-S-Shore	CGI-Shore	FALSE	FALSE	TRUE	0.563519	1.34212	0.593189	0.701161
cg00355613	7148	TNXB	chr6	32064956	32064957	CGI	CGI	FALSE	TRUE	FALSE	-1.52931	-0.0610078	0.262387	0.492645
cg00355699	NA	NA	chr13	104667830	104667831	Non-CGI	Non-CGI	FALSE	FALSE	TRUE	-0.58834	0.357852	0.401346	0.55619
cg00356694	201305	SPNS3	chr17	4337202	4337203	Non-CGI	Non-CGI	TRUE	FALSE	FALSE	-0.877309	-0.0366889	0.358287	0.490093
cg00356999	NA	NA	chr2	234119529	234119530	Non-CGI	Non-CGI	FALSE	FALSE	TRUE	0.960559	1.8114	0.657855	0.762864
cg00359590	1191	CLU	chr8	27469673	27469674	CGI-N-Shelf	CGI-Shelf	TRUE	TRUE	FALSE	0.769707	1.59936	0.627087	0.735361
cg00363080	105	ADARB2	chr10	1454292	1454293	CGI	CGI	FALSE	TRUE	FALSE	-0.483923	1.28778	0.419327	0.701366
cg00363737	340706	VWA2	chr10	116031419	116031420	Non-CGI	Non-CGI	FALSE	TRUE	FALSE	0.816599	2.43303	0.632809	0.834212
cg00365692	284367	SIGLEC17P	chr19	51670423	51670424	Non-CGI	Non-CGI	TRUE	FALSE	FALSE	-1.80513	0.131207	0.226923	0.52384
cg00366236	NA	NA	chr17	14952413	14952414	Non-CGI	Non-CGI	FALSE	FALSE	TRUE	0.430256	1.91135	0.56981	0.774761
cg00366252	NA	NA	chr16	85436841	85436842	CGI-S-Shore	CGI-Shore	FALSE	FALSE	TRUE	-0.168104	1.16986	0.471468	0.686564
cg00366917	4155	MBP	chr18	74845154	74845155	CGI	CGI	TRUE	FALSE	FALSE	-0.851906	-0.229313	0.358122	0.459091
cg00368296	1994	ELAVL1	chr19	8052183	8052184	CGI-S-Shore	CGI-Shore	FALSE	TRUE	FALSE	0.719652	2.46629	0.616984	0.823749
cg00369202	2914	GRM4	chr6	33989844	33989845	CGI	CGI	FALSE	TRUE	FALSE	-2.00439	-0.120187	0.205666	0.485684
cg00369241	387733	IFITM5	chr11	299588	299589	CGI-S-Shore	CGI-Shore	TRUE	FALSE	FALSE	-0.0683992	1.91417	0.486224	0.764888
cg00370106	94120	SYTL3	chr6	159071106	159071107	Non-CGI	Non-CGI	TRUE	FALSE	FALSE	-0.0754748	1.0624	0.486452	0.660854
cg00370589	27179	IL36A	chr2	113762280	113762281	Non-CGI	Non-CGI	TRUE	FALSE	FALSE	1.01135	1.83094	0.6625	0.775285
cg00370962	9779	TBC1D5	chr3	17199496	17199497	Non-CGI	Non-CGI	FALSE	TRUE	FALSE	-0.0820986	1.1586	0.490989	0.680049
cg00370968	643441	LOC643441	chr1	113749386	113749387	Non-CGI	Non-CGI	TRUE	FALSE	FALSE	0.689572	1.79114	0.615748	0.758208
cg00371134	26289	AK5	chr1	77912654	77912655	Non-CGI	Non-CGI	FALSE	TRUE	FALSE	1.10082	1.99109	0.674983	0.785777
cg00374105	54887	UHRF1BP1	chr6	34843579	34843580	Non-CGI	Non-CGI	FALSE	TRUE	FALSE	2.44445	3.96936	0.826759	0.939047
cg00381755	NA	NA	chr16	30572815	30572816	CGI	CGI	FALSE	FALSE	TRUE	-1.46464	-0.780045	0.271579	0.374185
cg00382053	7369	UMOD	chr16	20359444	20359445	CGI-N-Shore	CGI-Shore	FALSE	TRUE	FALSE	0.195503	0.949632	0.533867	0.654523
cg00383081	2752	GLUL	chr1	182362088	182362089	CGI-S-Shore	CGI-Shore	TRUE	FALSE	FALSE	1.64211	2.95545	0.75252	0.858624
cg00385596	5612	PRKRIR	chr11	76088726	76088727	CGI-N-Shelf	CGI-Shelf	FALSE	TRUE	FALSE	2.05047	2.9637	0.798583	0.877726
cg00385761	7483	WNT9A	chr1	228131966	228131967	CGI-N-Shelf	CGI-Shelf	FALSE	TRUE	FALSE	1.42828	3.23092	0.723347	0.892046
cg00386007	57705	WDFY4	chr10	50143337	50143338	Non-CGI	Non-CGI	TRUE	TRUE	FALSE	-0.693847	1.45773	0.383849	0.719707
cg00386940	6789	STK4	chr20	43593364	43593365	CGI-N-Shore	CGI-Shore	TRUE	TRUE	FALSE	1.2243	2.09444	0.690474	0.796469
cg00386940	100505826	STK4-AS1	chr20	43593364	43593365	CGI-N-Shore	CGI-Shore	TRUE	TRUE	FALSE	1.2243	2.09444	0.690474	0.796469
cg00388195	NA	NA	chr7	96647323	96647324	CGI	CGI	FALSE	FALSE	TRUE	-2.05473	0.0373228	0.198704	0.492415
cg00388812	116039	OSR2	chr8	99961376	99961377	CGI	CGI	FALSE	TRUE	FALSE	0.96112	1.95657	0.654982	0.788814
cg00392003	253769	WDR27	chr6	170040292	170040293	CGI	CGI	FALSE	TRUE	FALSE	0.768625	2.30721	0.626938	0.818062
cg00393050	NA	NA	chr3	14435541	14435542	Non-CGI	Non-CGI	FALSE	FALSE	TRUE	0.349364	2.07488	0.557125	0.792102
cg00394180	392255	GDF6	chr8	97167170	97167171	CGI	CGI	FALSE	TRUE	FALSE	-1.29223	-0.367482	0.292343	0.438941
cg00394316	256227	STEAP1B	chr7	22539822	22539823	CGI	CGI	TRUE	FALSE	FALSE	-2.63173	-1.71066	0.142116	0.236958
cg00397871	223075	CCDC129	chr7	31692686	31692687	Non-CGI	Non-CGI	FALSE	TRUE	FALSE	1.43748	2.14285	0.721795	0.809778
cg00398500	56606	SLC2A9	chr4	10041776	10041777	Non-CGI	Non-CGI	TRUE	FALSE	FALSE	-0.682477	-0.013624	0.39003	0.49902
cg00400096	NA	NA	chr11	41644529	41644530	CGI	CGI	FALSE	FALSE	TRUE	2.38637	3.05092	0.833173	0.886998
cg00400832	1749	DLX5	chr7	96650323	96650324	CGI-S-Shore	CGI-Shore	FALSE	TRUE	FALSE	-0.66423	0.714845	0.394077	0.592126
cg00401939	NA	NA	chr6	14397330	14397331	Non-CGI	Non-CGI	FALSE	FALSE	TRUE	-1.19553	-0.0718584	0.312115	0.489796
cg00404717	NA	NA	chr4	174912178	174912179	Non-CGI	Non-CGI	FALSE	FALSE	TRUE	1.08153	2.17132	0.675463	0.804293
cg00405554	401463	LOC401463	chr8	65490897	65490898	CGI	CGI	TRUE	TRUE	FALSE	-0.804332	0.385875	0.366223	0.560996
cg00405554	27319	BHLHE22	chr8	65490897	65490898	CGI	CGI	TRUE	TRUE	FALSE	-0.804332	0.385875	0.366223	0.560996
cg00409245	221496	LEMD2	chr6	33757653	33757654	CGI-S-Shore	CGI-Shore	TRUE	FALSE	FALSE	-2.12227	1.90714	0.187706	0.737099
cg00412805	131377	KLHL40	chr3	42726970	42726971	CGI-N-Shore	CGI-Shore	TRUE	FALSE	FALSE	2.68408	3.58808	0.860068	0.921672
cg00415011	NA	NA	chr8	142046261	142046262	Non-CGI	Non-CGI	FALSE	FALSE	TRUE	-0.180857	3.33893	0.47056	0.894442
cg00415665	22882	ZHX2	chr8	123875036	123875037	CGI	CGI	FALSE	TRUE	FALSE	3.67057	4.33479	0.92067	0.948191
cg00415971	5995	RGR	chr10	86004761	86004762	Non-CGI	Non-CGI	TRUE	FALSE	FALSE	-2.75256	-2.13315	0.130409	0.191391
cg00417025	5629	PROX1	chr1	214171381	214171382	CGI-S-Shore	CGI-Shore	FALSE	TRUE	FALSE	1.03414	1.64641	0.667805	0.752081
cg00417424	NA	NA	chr5	179224563	179224564	CGI-S-Shore	CGI-Shore	FALSE	FALSE	TRUE	2.27572	3.05437	0.825664	0.888454
cg00418216	221883	HOXA11-AS	chr7	27227847	27227848	CGI	CGI	TRUE	TRUE	FALSE	1.11416	2.24854	0.667896	0.804187
cg00419512	3486	IGFBP3	chr7	45953027	45953028	Non-CGI	Non-CGI	FALSE	TRUE	FALSE	2.52411	4.41717	0.827604	0.954874
cg00420997	619351	LINC00589	chr8	29607076	29607077	Non-CGI	Non-CGI	TRUE	TRUE	FALSE	0.633682	1.24876	0.602131	0.69499
cg00421089	4619	MYH1	chr17	10421635	10421636	Non-CGI	Non-CGI	FALSE	TRUE	FALSE	0.243129	1.42089	0.539919	0.711594
cg00421624	11000	SLC27A3	chr1	153746588	153746589	CGI-N-Shore	CGI-Shore	TRUE	FALSE	FALSE	0.133861	1.69148	0.522843	0.729833
cg00423030	57690	TNRC6C	chr17	76037075	76037076	CGI	CGI	FALSE	TRUE	FALSE	-3.26581	-1.89834	0.105147	0.235757
cg00423453	390058	OR51B6	chr11	5372944	5372945	Non-CGI	Non-CGI	TRUE	TRUE	FALSE	1.06004	1.72183	0.671382	0.763606
cg00423453	282763	OR51B5	chr11	5372944	5372945	Non-CGI	Non-CGI	TRUE	TRUE	FALSE	1.06004	1.72183	0.671382	0.763606
cg00423453	3046	HBE1	chr11	5372944	5372945	Non-CGI	Non-CGI	TRUE	TRUE	FALSE	1.06004	1.72183	0.671382	0.763606
cg00423453	3048	HBG2	chr11	5372944	5372945	Non-CGI	Non-CGI	TRUE	TRUE	FALSE	1.06004	1.72183	0.671382	0.763606
cg00423969	90342	FER1L5	chr2	97359879	97359880	CGI-S-Shelf	CGI-Shelf	TRUE	TRUE	FALSE	0.677042	1.39496	0.60995	0.718355
cg00424286	6196	RPS6KA2	chr6	166887879	166887880	CGI-N-Shelf	CGI-Shelf	FALSE	TRUE	FALSE	3.00994	3.6474	0.882499	0.924384
cg00426486	NA	NA	chr16	86605100	86605101	CGI-S-Shore	CGI-Shore	FALSE	FALSE	TRUE	0.420728	1.35609	0.569397	0.702384
cg00428638	3643	INSR	chr19	7224713	7224714	Non-CGI	Non-CGI	FALSE	TRUE	FALSE	-1.8516	-0.72487	0.222732	0.391475
cg00429107	23308	ICOSLG	chr21	45662813	45662814	CGI	CGI	TRUE	FALSE	FALSE	-2.21199	-1.55176	0.179637	0.26207
cg00431187	3200	HOXA3	chr7	27161749	27161750	CGI	CGI	FALSE	TRUE	FALSE	2.89583	4.35633	0.869122	0.952488
cg00431968	NA	NA	chr8	92528313	92528314	Non-CGI	Non-CGI	FALSE	FALSE	TRUE	1.49485	2.13567	0.734252	0.805567
cg00433709	84937	ZNRF1	chr16	75107666	75107667	Non-CGI	Non-CGI	FALSE	TRUE	FALSE	0.00746538	1.31341	0.499072	0.698597
cg00435752	NA	NA	chr15	98961417	98961418	CGI-N-Shelf	CGI-Shelf	FALSE	FALSE	TRUE	-0.842812	-0.11153	0.361507	0.479373
cg00442109	NA	NA	chr10	23492798	23492799	CGI	CGI	FALSE	FALSE	TRUE	-1.82966	-1.09378	0.223886	0.330496
cg00443094	NA	NA	chr4	1771149	1771150	CGI-S-Shore	CGI-Shore	FALSE	FALSE	TRUE	0.168739	2.01027	0.528963	0.779746
cg00443946	732275	LINC00917	chr16	86370962	86370963	CGI-N-Shore	CGI-Shore	FALSE	TRUE	FALSE	1.4148	2.11568	0.7217	0.80619
cg00446065	8379	MAD1L1	chr7	2154175	2154176	CGI	CGI	FALSE	TRUE	FALSE	1.43956	3.57442	0.709984	0.901907
cg00447817	22941	SHANK2	chr11	70484490	70484491	Non-CGI	Non-CGI	FALSE	TRUE	FALSE	-0.60809	0.923387	0.404854	0.645253
cg00449021	NA	NA	chr1	234658467	234658468	Non-CGI	Non-CGI	FALSE	FALSE	TRUE	-0.860578	0.986409	0.357464	0.642424
cg00449930	NA	NA	chr16	69555896	69555897	Non-CGI	Non-CGI	FALSE	FALSE	TRUE	0.844479	2.06493	0.641053	0.799396
cg00451651	157680	VPS13B	chr8	100252466	100252467	Non-CGI	Non-CGI	FALSE	TRUE	FALSE	2.67797	3.42106	0.860626	0.913338
cg00452308	401014	TEX41	chr2	145633791	145633792	Non-CGI	Non-CGI	FALSE	TRUE	FALSE	1.15406	2.83752	0.686649	0.868307
cg00458878	NA	NA	chr7	27260285	27260286	CGI	CGI	FALSE	FALSE	TRUE	-0.415376	0.254892	0.433469	0.543792
cg00459997	NA	NA	chr12	130621721	130621722	CGI	CGI	FALSE	FALSE	TRUE	-1.71968	0.268239	0.241146	0.547105
cg00460589	51256	TBC1D7	chr6	13274354	13274355	CGI	CGI	FALSE	TRUE	FALSE	1.19246	3.19239	0.682929	0.899215
cg00460589	221692	PHACTR1	chr6	13274354	13274355	CGI	CGI	FALSE	TRUE	FALSE	1.19246	3.19239	0.682929	0.899215
cg00460795	55240	STEAP3	chr2	119998072	119998073	Non-CGI	Non-CGI	FALSE	TRUE	FALSE	-0.541576	1.48882	0.408859	0.715275
cg00460983	3988	LIPA	chr10	91133941	91133942	Non-CGI	Non-CGI	FALSE	TRUE	FALSE	-1.88508	-1.03518	0.214369	0.339873
cg00461578	152485	ZNF827	chr4	146819333	146819334	Non-CGI	Non-CGI	FALSE	TRUE	FALSE	0.117973	1.72718	0.518521	0.753215
cg00462971	NA	NA	chr3	194784405	194784406	CGI-S-Shore	CGI-Shore	FALSE	FALSE	TRUE	1.04379	2.55947	0.666183	0.839996
cg00464757	NA	NA	chr4	3288648	3288649	CGI	CGI	FALSE	FALSE	TRUE	-1.24947	0.853408	0.302407	0.62505
cg00467652	8692	HYAL2	chr3	50357644	50357645	CGI	CGI	TRUE	TRUE	FALSE	3.04447	3.66089	0.887059	0.925583
cg00468125	282974	STK32C	chr10	134046066	134046067	CGI	CGI	FALSE	TRUE	FALSE	-0.02906	1.16943	0.494851	0.684141
cg00468228	1392	CRH	chr8	67092562	67092563	CGI-S-Shore	CGI-Shore	TRUE	FALSE	FALSE	-1.36738	0.718478	0.294329	0.620145
cg00469547	NA	NA	chr2	129244034	129244035	CGI	CGI	FALSE	FALSE	TRUE	2.00784	2.89607	0.793372	0.873261
cg00470044	9577	BRE	chr2	28456184	28456185	Non-CGI	Non-CGI	FALSE	TRUE	FALSE	-1.97066	-1.30515	0.204474	0.294563
cg00470641	NA	NA	chr10	3096219	3096220	Non-CGI	Non-CGI	FALSE	FALSE	TRUE	2.72431	3.37234	0.862933	0.909892
cg00471141	4023	LPL	chr8	19796299	19796300	CGI-N-Shore	CGI-Shore	TRUE	FALSE	FALSE	-0.564173	1.60083	0.408244	0.744655
cg00471159	3912	LAMB1	chr7	107641796	107641797	CGI-N-Shore	CGI-Shore	TRUE	TRUE	FALSE	-0.488405	0.981033	0.41943	0.653923
cg00474696	65080	MRPL44	chr2	224821113	224821114	CGI-N-Shore	CGI-Shore	TRUE	FALSE	FALSE	2.09458	3.17027	0.804612	0.891029
cg00477302	406958	MIR182	chr7	129411088	129411089	Non-CGI	Non-CGI	TRUE	FALSE	FALSE	-1.64468	-0.488849	0.243609	0.419816
cg00478326	NA	NA	chr15	78978136	78978137	Non-CGI	Non-CGI	FALSE	FALSE	TRUE	-0.851586	0.713335	0.358272	0.607356
cg00478421	NA	NA	chr2	11515109	11515110	CGI	CGI	FALSE	FALSE	TRUE	-3.19717	-0.698591	0.0993164	0.40159
cg00479411	NA	NA	chr11	129237432	129237433	CGI-S-Shelf	CGI-Shelf	FALSE	FALSE	TRUE	0.103	1.8796	0.516423	0.769268
cg00479912	NA	NA	chr16	79472241	79472242	CGI-N-Shore	CGI-Shore	FALSE	FALSE	TRUE	-1.35454	0.547452	0.286432	0.591006
cg00481639	NA	NA	chr2	16514107	16514108	Non-CGI	Non-CGI	FALSE	FALSE	TRUE	-1.61988	0.0494901	0.247778	0.510683
cg00482162	344558	SH3RF3	chr2	109896312	109896313	Non-CGI	Non-CGI	FALSE	TRUE	FALSE	-0.393787	0.36216	0.434104	0.556266
cg00483030	8535	CBX4	chr17	77810509	77810510	CGI-S-Shore	CGI-Shore	FALSE	TRUE	FALSE	-0.446334	1.9544	0.424764	0.773946
cg00483893	NA	NA	chr11	60501032	60501033	Non-CGI	Non-CGI	TRUE	FALSE	FALSE	-0.127642	0.828648	0.476924	0.63578
cg00484083	NA	NA	chr2	95876354	95876355	CGI-S-Shelf	CGI-Shelf	FALSE	FALSE	TRUE	1.33217	2.34607	0.703171	0.822551
cg00486259	152503	SH3D19	chr4	152096720	152096721	Non-CGI	Non-CGI	TRUE	TRUE	FALSE	-0.568092	1.96659	0.404424	0.769164
cg00486280	NA	NA	chr15	34988869	34988870	Non-CGI	Non-CGI	FALSE	FALSE	TRUE	-0.725672	0.0698969	0.3812	0.511295
cg00489213	84498	FAM120B	chr6	170686956	170686957	CGI	CGI	FALSE	TRUE	FALSE	3.08901	3.75265	0.887067	0.926426
cg00490004	NA	NA	chr3	74666148	74666149	CGI-S-Shelf	CGI-Shelf	FALSE	FALSE	TRUE	0.240007	1.32525	0.541638	0.705075
cg00491927	NA	NA	chr3	120003642	120003643	CGI	CGI	FALSE	FALSE	TRUE	-1.7109	-0.952162	0.237928	0.347809
cg00493242	NA	NA	chr4	20660098	20660099	Non-CGI	Non-CGI	FALSE	FALSE	TRUE	1.92069	2.76384	0.783396	0.8687
cg00493716	NA	NA	chr18	77545028	77545029	CGI	CGI	FALSE	FALSE	TRUE	-0.0782212	0.62136	0.488312	0.599077
cg00494710	5496	PPM1G	chr2	27633183	27633184	CGI-S-Shore	CGI-Shore	TRUE	FALSE	FALSE	1.83054	2.7354	0.769648	0.846709
cg00495303	9229	DLGAP1	chr18	3771110	3771111	CGI-N-Shore	CGI-Shore	FALSE	TRUE	FALSE	0.244702	1.57338	0.540279	0.741237
cg00495443	23765	IL17RA	chr22	17568163	17568164	CGI-S-Shore	CGI-Shore	FALSE	TRUE	FALSE	3.64753	4.45425	0.923304	0.956123
cg00495693	5314	PKHD1	chr6	51928623	51928624	Non-CGI	Non-CGI	FALSE	TRUE	FALSE	-0.562175	0.197402	0.408809	0.533746
cg00495811	54947	LPCAT2	chr16	55619692	55619693	Non-CGI	Non-CGI	FALSE	TRUE	FALSE	1.76145	3.06705	0.763002	0.887984
cg00496484	NA	NA	chr2	3153332	3153333	CGI-S-Shore	CGI-Shore	FALSE	FALSE	TRUE	0.467597	1.86052	0.576027	0.752426
cg00501542	NA	NA	chr1	202995246	202995247	CGI-N-Shore	CGI-Shore	FALSE	FALSE	TRUE	1.52329	2.42354	0.732841	0.825167
cg00501774	5742	PTGS1	chr9	125132660	125132661	CGI-N-Shore	CGI-Shore	TRUE	FALSE	FALSE	2.99325	3.75492	0.883452	0.928747
cg00502077	163859	SDE2	chr1	226186128	226186129	CGI-N-Shore	CGI-Shore	FALSE	TRUE	FALSE	0.523037	1.1638	0.588528	0.684848
cg00504569	84159	ARID5B	chr10	63697267	63697268	Non-CGI	Non-CGI	FALSE	TRUE	FALSE	0.736689	3.42773	0.62234	0.896267
cg00506828	NA	NA	chr4	190731458	190731459	CGI-N-Shore	CGI-Shore	FALSE	FALSE	TRUE	0.786768	1.5435	0.625786	0.739568
cg00508577	135398	C6orf141	chr6	49517014	49517015	CGI-N-Shore	CGI-Shore	TRUE	FALSE	FALSE	0.942805	2.50169	0.652512	0.83959
cg00508950	NA	NA	chr12	132916034	132916035	CGI-S-Shore	CGI-Shore	FALSE	FALSE	TRUE	-0.009343	0.877198	0.499215	0.643314
cg00508975	116135	LRRC3B	chr3	26666151	26666152	CGI-S-Shore	CGI-Shore	TRUE	TRUE	FALSE	-1.78516	-0.47446	0.232966	0.42358
cg00509007	1509	CTSD	chr11	1781557	1781558	CGI-N-Shore	CGI-Shore	FALSE	TRUE	FALSE	0.625817	2.60626	0.597769	0.834232
cg00509007	81532	MOB2	chr11	1781557	1781558	CGI-N-Shore	CGI-Shore	FALSE	TRUE	FALSE	0.625817	2.60626	0.597769	0.834232
cg00509485	NA	NA	chr11	69863098	69863099	CGI-N-Shelf	CGI-Shelf	FALSE	FALSE	TRUE	-2.55832	-1.65394	0.150109	0.258179
cg00509610	80746	TSEN2	chr3	12528629	12528630	CGI-S-Shelf	CGI-Shelf	FALSE	TRUE	FALSE	0.497567	1.87257	0.582319	0.776713
cg00510437	9815	GIT2	chr12	110384506	110384507	Non-CGI	Non-CGI	FALSE	TRUE	FALSE	0.20518	1.82552	0.525036	0.751445
cg00510437	84260	TCHP	chr12	110384506	110384507	Non-CGI	Non-CGI	FALSE	TRUE	FALSE	0.20518	1.82552	0.525036	0.751445
cg00510507	288	ANK3	chr10	61900413	61900414	Non-CGI	Non-CGI	TRUE	TRUE	FALSE	0.82466	2.10667	0.635272	0.80145
cg00510689	153745	FAM71B	chr5	156594470	156594471	Non-CGI	Non-CGI	TRUE	FALSE	FALSE	-1.46685	1.63337	0.27331	0.733955
cg00512602	201176	ARHGAP27	chr17	43507585	43507586	CGI	CGI	TRUE	TRUE	FALSE	-1.0181	0.229936	0.338574	0.534982
cg00513564	NA	NA	chr13	44388673	44388674	Non-CGI	Non-CGI	FALSE	FALSE	TRUE	1.60832	2.84364	0.744225	0.8717
cg00514241	4330	MN1	chr22	28193910	28193911	CGI	CGI	TRUE	FALSE	FALSE	1.973	2.75303	0.789102	0.851492
cg00514723	84181	CHD6	chr20	40244770	40244771	CGI-N-Shore	CGI-Shore	FALSE	TRUE	FALSE	2.12486	3.04093	0.803689	0.88516
cg00516966	218	ALDH3A1	chr17	19651653	19651654	CGI-S-Shore	CGI-Shore	TRUE	FALSE	FALSE	-0.540453	0.0717618	0.409193	0.512249
cg00520247	NA	NA	chr16	87219691	87219692	CGI	CGI	FALSE	TRUE	FALSE	2.47091	3.09886	0.842158	0.891379
cg00520406	NA	NA	chr6	3623902	3623903	Non-CGI	Non-CGI	FALSE	FALSE	TRUE	0.0683512	1.96025	0.510419	0.792762
cg00522276	NA	NA	chr8	67452722	67452723	CGI-N-Shore	CGI-Shore	FALSE	FALSE	TRUE	-2.76081	-2.06532	0.12981	0.205069
cg00522588	8085	KMT2D	chr12	49449063	49449064	Non-CGI	Non-CGI	TRUE	FALSE	FALSE	1.44629	2.53226	0.71392	0.82969
cg00522935	93589	CACNA2D4	chr12	1964603	1964604	Non-CGI	Non-CGI	TRUE	TRUE	FALSE	-0.0979428	0.614772	0.484612	0.600786
cg00523161	23175	LPIN1	chr2	11888753	11888754	CGI-S-Shore	CGI-Shore	FALSE	TRUE	FALSE	0.450146	1.65519	0.576048	0.750567
cg00524443	3213	HOXB3	chr17	46650310	46650311	CGI-S-Shore	CGI-Shore	FALSE	TRUE	FALSE	-0.76297	0.0385359	0.374539	0.505668
cg00524486	727897	MUC5B	chr11	1244110	1244111	CGI-S-Shore	CGI-Shore	TRUE	TRUE	FALSE	-1.68878	-0.921124	0.237749	0.348853
cg00524676	NA	NA	chr12	34537250	34537251	CGI	CGI	FALSE	FALSE	TRUE	0.869185	1.56702	0.640679	0.739821
cg00524781	3482	IGF2R	chr6	160523923	160523924	CGI	CGI	FALSE	TRUE	FALSE	-0.0657783	1.90264	0.488633	0.761516
cg00524900	25816	TNFAIP8	chr5	118609965	118609966	Non-CGI	Non-CGI	FALSE	TRUE	FALSE	0.120086	1.03406	0.519916	0.661289
cg00525277	7148	TNXB	chr6	32064239	32064240	CGI	CGI	FALSE	TRUE	FALSE	-0.829241	2.98222	0.376914	0.844989
cg00527307	90627	STARD13	chr13	34208894	34208895	Non-CGI	Non-CGI	FALSE	TRUE	FALSE	-0.251803	1.21991	0.457315	0.680072
cg00529742	NA	NA	chr1	209607166	209607167	Non-CGI	Non-CGI	FALSE	FALSE	TRUE	0.3692	1.27146	0.562965	0.69773
cg00530564	9612	NCOR2	chr12	125036429	125036430	CGI-S-Shelf	CGI-Shelf	FALSE	TRUE	FALSE	-1.63319	-0.883968	0.245763	0.359209
cg00530805	23394	ADNP	chr20	49545062	49545063	CGI-N-Shelf	CGI-Shelf	FALSE	TRUE	FALSE	-0.749357	0.745725	0.374234	0.611781
cg00534624	3483	IGFALS	chr16	1845096	1845097	CGI	CGI	TRUE	FALSE	FALSE	1.77395	2.75148	0.769767	0.868745
cg00536910	NA	NA	chr8	1319507	1319508	CGI-N-Shore	CGI-Shore	FALSE	FALSE	TRUE	-1.94931	-0.791273	0.211707	0.378157
cg00538212	NA	NA	chr7	158751591	158751592	CGI-S-Shore	CGI-Shore	FALSE	FALSE	TRUE	-1.73371	-0.245044	0.239307	0.465069
cg00538888	NA	NA	chr10	129703001	129703002	CGI-N-Shelf	CGI-Shelf	FALSE	FALSE	TRUE	2.31245	3.12313	0.821863	0.891358
cg00539154	23261	CAMTA1	chr1	7181893	7181894	CGI-N-Shelf	CGI-Shelf	FALSE	TRUE	FALSE	-1.97352	-0.357216	0.206158	0.445054
cg00541683	64129	TINAGL1	chr1	32041933	32041934	Non-CGI	Non-CGI	TRUE	FALSE	FALSE	-1.64516	-0.30133	0.246543	0.451315
cg00541718	5575	PRKAR1B	chr7	630823	630824	CGI	CGI	FALSE	TRUE	FALSE	-1.84045	-0.573249	0.221328	0.416566
cg00542975	23332	CLASP1	chr2	122392291	122392292	Non-CGI	Non-CGI	FALSE	TRUE	FALSE	-1.488	0.755187	0.270657	0.616688
cg00543460	7168	TPM1	chr15	63337496	63337497	CGI-S-Shore	CGI-Shore	FALSE	TRUE	FALSE	-1.75079	0.758917	0.237365	0.614828
cg00546117	473	RERE	chr1	8445545	8445546	Non-CGI	Non-CGI	FALSE	TRUE	FALSE	-0.50443	2.01876	0.414474	0.786712
cg00547530	23059	CLUAP1	chr16	3559687	3559688	Non-CGI	Non-CGI	TRUE	TRUE	FALSE	1.41766	2.24355	0.722963	0.804102
cg00548708	NA	NA	chr17	48041547	48041548	CGI	CGI	FALSE	FALSE	TRUE	-2.30185	-0.640067	0.176235	0.397186
cg00550955	NA	NA	chr22	22012657	22012658	CGI-S-Shore	CGI-Shore	FALSE	FALSE	TRUE	-0.30834	0.318322	0.448038	0.552841
cg00551146	55691	FRMD4A	chr10	14014579	14014580	Non-CGI	Non-CGI	TRUE	TRUE	FALSE	0.742459	1.98265	0.61912	0.773144
cg00551398	57038	RARS2	chr6	88298474	88298475	CGI-N-Shore	CGI-Shore	TRUE	TRUE	FALSE	2.95455	4.03295	0.872033	0.941112
cg00551398	23595	ORC3	chr6	88298474	88298475	CGI-N-Shore	CGI-Shore	TRUE	TRUE	FALSE	2.95455	4.03295	0.872033	0.941112
cg00551679	2294	FOXF1	chr16	86547530	86547531	CGI-S-Shore	CGI-Shore	FALSE	TRUE	FALSE	-0.297863	2.46209	0.452753	0.83151
cg00552696	NA	NA	chr10	29195190	29195191	Non-CGI	Non-CGI	FALSE	FALSE	TRUE	0.0332518	2.20238	0.505684	0.804353
cg00555393	414149	ACBD7	chr10	15077929	15077930	Non-CGI	Non-CGI	FALSE	TRUE	FALSE	0.0219375	1.84161	0.503723	0.760532
cg00555816	NA	NA	chr13	113584082	113584083	CGI-N-Shore	CGI-Shore	FALSE	TRUE	FALSE	-2.23917	0.973177	0.176574	0.643521
cg00556627	26010	SPATS2L	chr2	201187003	201187004	Non-CGI	Non-CGI	FALSE	TRUE	FALSE	2.46853	3.7937	0.844385	0.930327
cg00559560	54039	PCBP3	chr21	47317093	47317094	CGI-S-Shore	CGI-Shore	FALSE	TRUE	FALSE	1.91036	2.52194	0.782311	0.847356
cg00562468	NA	NA	chr6	37519216	37519217	Non-CGI	Non-CGI	FALSE	FALSE	TRUE	-0.346724	0.473833	0.441389	0.57441
cg00564546	123591	C15orf27	chr15	76496741	76496742	Non-CGI	Non-CGI	FALSE	TRUE	FALSE	1.8494	3.65475	0.77229	0.923205
cg00566369	NA	NA	chr8	144935784	144935785	Non-CGI	Non-CGI	FALSE	FALSE	TRUE	-1.9185	-0.829858	0.210172	0.369137
cg00566899	7399	USH2A	chr1	216058191	216058192	Non-CGI	Non-CGI	FALSE	TRUE	FALSE	2.26828	2.95731	0.820218	0.875908
cg00567854	730227	LOC730227	chr1	203273693	203273694	CGI-N-Shore	CGI-Shore	TRUE	TRUE	FALSE	0.795024	1.94457	0.627022	0.751648
cg00567854	7832	BTG2	chr1	203273693	203273694	CGI-N-Shore	CGI-Shore	TRUE	TRUE	FALSE	0.795024	1.94457	0.627022	0.751648
cg00570000	200162	SPAG17	chr1	118728226	118728227	CGI-S-Shore	CGI-Shore	TRUE	FALSE	FALSE	-0.579281	0.11911	0.402232	0.521166
cg00571483	NA	NA	chr1	59046173	59046174	CGI-S-Shelf	CGI-Shelf	FALSE	FALSE	TRUE	-0.37384	0.315654	0.436265	0.552767
cg00572266	NA	NA	chr11	9029940	9029941	CGI-S-Shelf	CGI-Shelf	FALSE	FALSE	TRUE	-1.43765	-0.672636	0.275771	0.390844
cg00572323	23475	QPRT	chr16	29706151	29706152	CGI-N-Shore	CGI-Shore	FALSE	TRUE	FALSE	-1.45982	0.133147	0.267991	0.515343
cg00572323	552900	BOLA2	chr16	29706151	29706152	CGI-N-Shore	CGI-Shore	FALSE	TRUE	FALSE	-1.45982	0.133147	0.267991	0.515343
cg00573235	NA	NA	chr16	56883532	56883533	Non-CGI	Non-CGI	FALSE	FALSE	TRUE	1.00156	1.66814	0.664525	0.749909
cg00574740	4008	LMO7	chr13	76209541	76209542	CGI-N-Shore	CGI-Shore	TRUE	TRUE	FALSE	-2.04773	-0.874195	0.203415	0.3691
cg00575003	2104	ESRRG	chr1	217261949	217261950	CGI-N-Shore	CGI-Shore	FALSE	TRUE	FALSE	-0.159408	1.25143	0.475174	0.694746
cg00575153	5339	PLEC	chr8	145047469	145047470	CGI	CGI	FALSE	TRUE	FALSE	-1.77264	-0.557077	0.234098	0.414789
cg00575665	9935	MAFB	chr20	39315211	39315212	CGI-N-Shore	CGI-Shore	TRUE	FALSE	FALSE	-0.253319	0.866564	0.458553	0.634552
cg00576027	1770	DNAH9	chr17	11500910	11500911	CGI-N-Shore	CGI-Shore	TRUE	FALSE	FALSE	-0.0896818	1.46805	0.487972	0.727995
cg00576086	7015	TERT	chr5	1269066	1269067	CGI-S-Shore	CGI-Shore	FALSE	TRUE	FALSE	1.03542	2.13853	0.66779	0.807806
cg00577560	23254	KAZN	chr1	15271830	15271831	Non-CGI	Non-CGI	TRUE	TRUE	FALSE	-1.4224	-0.477653	0.276281	0.423045
cg00578614	NA	NA	chr6	30070403	30070404	CGI-S-Shore	CGI-Shore	FALSE	FALSE	TRUE	-0.865561	-0.198872	0.356757	0.468061
cg00578673	91156	IGFN1	chr1	201195213	201195214	Non-CGI	Non-CGI	FALSE	TRUE	FALSE	0.481433	1.65696	0.579361	0.753815
cg00581320	8618	CADPS	chr3	62425299	62425300	Non-CGI	Non-CGI	FALSE	TRUE	FALSE	0.0393795	0.80452	0.506791	0.632163
cg00581541	692234	SNORD103A	chr1	31423283	31423284	Non-CGI	Non-CGI	TRUE	TRUE	FALSE	1.09831	3.1486	0.679619	0.864227
cg00581541	9698	PUM1	chr1	31423283	31423284	Non-CGI	Non-CGI	TRUE	TRUE	FALSE	1.09831	3.1486	0.679619	0.864227
cg00581764	NA	NA	chr6	158183853	158183854	Non-CGI	Non-CGI	FALSE	FALSE	TRUE	0.748159	2.38345	0.623245	0.824856
cg00585213	116987	AGAP1	chr2	236760254	236760255	CGI-N-Shore	CGI-Shore	FALSE	TRUE	FALSE	3.27474	3.98698	0.89812	0.939118
cg00585714	392255	GDF6	chr8	97156859	97156860	CGI	CGI	FALSE	TRUE	FALSE	-1.06318	-0.112332	0.32717	0.480302
cg00585790	3987	LIMS1	chr2	109204845	109204846	Non-CGI	Non-CGI	TRUE	TRUE	FALSE	1.07569	2.45734	0.672581	0.829028
cg00586700	2217	FCGRT	chr19	50015178	50015179	CGI-N-Shore	CGI-Shore	TRUE	FALSE	FALSE	-1.02932	0.0723712	0.329641	0.509033
cg00587115	64759	TNS3	chr7	47621025	47621026	CGI	CGI	FALSE	TRUE	FALSE	-2.6789	-1.76058	0.136114	0.237962
cg00587301	NA	NA	chr6	156717406	156717407	CGI-N-Shore	CGI-Shore	FALSE	FALSE	TRUE	-0.440997	1.4293	0.423698	0.715384
cg00587342	5372	PMM1	chr22	41983798	41983799	CGI-N-Shore	CGI-Shore	FALSE	TRUE	FALSE	-1.43163	0.685375	0.272199	0.609754
cg00589006	6483	ST3GAL2	chr16	70415864	70415865	CGI-S-Shore	CGI-Shore	FALSE	TRUE	FALSE	-0.58245	0.0691808	0.403796	0.512086
cg00589161	116154	PHACTR3	chr20	58295996	58295997	Non-CGI	Non-CGI	TRUE	TRUE	FALSE	1.29081	2.29556	0.701848	0.815382
cg00590036	57583	TMEM181	chr6	158957433	158957434	CGI	CGI	TRUE	FALSE	FALSE	-0.910284	0.93625	0.350326	0.644018
cg00590817	NA	NA	chr1	8272081	8272082	CGI	CGI	FALSE	FALSE	TRUE	-2.23596	-0.701691	0.187332	0.395939
cg00591660	899	CCNF	chr16	2478353	2478354	CGI-N-Shore	CGI-Shore	TRUE	FALSE	FALSE	0.140348	1.13282	0.525039	0.677614
cg00592007	8912	CACNA1H	chr16	1226235	1226236	CGI	CGI	FALSE	TRUE	FALSE	-2.30929	-0.52238	0.169828	0.414598
cg00593008	22987	SV2C	chr5	75465603	75465604	CGI-N-Shore	CGI-Shore	FALSE	TRUE	FALSE	-0.715055	-0.0407078	0.383668	0.49356
cg00593111	863	CBFA2T3	chr16	88958311	88958312	CGI	CGI	FALSE	TRUE	FALSE	-0.750027	-0.0945288	0.375952	0.483773
cg00593462	NA	NA	chr13	110768493	110768494	CGI	CGI	FALSE	FALSE	TRUE	1.32289	2.23621	0.701121	0.817318
cg00593900	83854	ANGPTL6	chr19	10206746	10206747	CGI	CGI	FALSE	TRUE	FALSE	-3.32378	-2.53781	0.0955762	0.172275
cg00594228	574410	MIR323B	chr14	101522431	101522432	Non-CGI	Non-CGI	TRUE	FALSE	FALSE	2.3527	3.12041	0.824783	0.889053
cg00598021	9948	WDR1	chr4	10113794	10113795	CGI-N-Shelf	CGI-Shelf	FALSE	TRUE	FALSE	1.3298	2.19603	0.707743	0.803257
cg00598912	9228	DLGAP2	chr8	1468625	1468626	CGI-N-Shore	CGI-Shore	FALSE	TRUE	FALSE	1.06615	1.73978	0.669209	0.763947
cg00600854	NA	NA	chr1	4191364	4191365	CGI-N-Shore	CGI-Shore	FALSE	FALSE	TRUE	0.661832	1.40487	0.608904	0.719155
cg00601042	50614	GALNT9	chr12	132900274	132900275	CGI	CGI	FALSE	TRUE	FALSE	-1.45097	0.459758	0.273457	0.573181
cg00601648	114	ADCY8	chr8	131974587	131974588	Non-CGI	Non-CGI	FALSE	TRUE	FALSE	0.68841	2.04957	0.61476	0.791245
cg00602295	NA	NA	chr16	81328089	81328090	Non-CGI	Non-CGI	FALSE	FALSE	TRUE	-1.84178	0.81586	0.221171	0.610528
cg00603371	2018	EMX2	chr10	119300783	119300784	CGI-N-Shore	CGI-Shore	TRUE	TRUE	FALSE	-1.86657	0.950426	0.218706	0.624449
cg00603371	196047	EMX2OS	chr10	119300783	119300784	CGI-N-Shore	CGI-Shore	TRUE	TRUE	FALSE	-1.86657	0.950426	0.218706	0.624449
cg00605063	NA	NA	chr7	27289128	27289129	CGI-N-Shore	CGI-Shore	FALSE	FALSE	TRUE	-1.00649	0.488733	0.337193	0.582734
cg00605628	121601	ANO4	chr12	101413143	101413144	Non-CGI	Non-CGI	FALSE	TRUE	FALSE	2.12126	2.94077	0.798083	0.878228
cg00605777	54910	SEMA4C	chr2	97533635	97533636	CGI-N-Shore	CGI-Shore	TRUE	TRUE	FALSE	-1.55014	-0.831595	0.256346	0.368013
cg00607058	23762	OSBP2	chr22	31090071	31090072	CGI-N-Shore	CGI-Shore	TRUE	TRUE	FALSE	0.130391	1.25395	0.519471	0.673695
cg00607194	91523	PCED1B	chr12	47479795	47479796	Non-CGI	Non-CGI	FALSE	TRUE	FALSE	-0.205467	1.73216	0.463362	0.75161
cg00614503	439950	CELF2-AS2	chr10	11117464	11117465	Non-CGI	Non-CGI	FALSE	TRUE	FALSE	2.2403	3.13694	0.815547	0.881919
cg00614503	10659	CELF2	chr10	11117464	11117465	Non-CGI	Non-CGI	FALSE	TRUE	FALSE	2.2403	3.13694	0.815547	0.881919
cg00614617	NA	NA	chr17	8921074	8921075	CGI-N-Shelf	CGI-Shelf	FALSE	FALSE	TRUE	0.243553	1.98539	0.540118	0.776405
cg00614959	10336	PCGF3	chr4	720870	720871	CGI-S-Shore	CGI-Shore	FALSE	TRUE	FALSE	0.747558	2.91429	0.608422	0.845947
cg00618309	NA	NA	chr8	129263509	129263510	Non-CGI	Non-CGI	FALSE	FALSE	TRUE	2.3416	2.9901	0.831695	0.879676
cg00620976	NA	NA	chr16	65612895	65612896	Non-CGI	Non-CGI	FALSE	FALSE	TRUE	0.986333	1.74216	0.663296	0.751245
cg00621084	100131211	TMEM194B	chr2	191400610	191400611	CGI-S-Shore	CGI-Shore	TRUE	FALSE	FALSE	1.45957	3.23244	0.728552	0.893714
cg00622128	NA	NA	chr16	86714999	86715000	CGI-N-Shore	CGI-Shore	FALSE	FALSE	TRUE	-0.619116	0.87754	0.395299	0.636675
cg00623774	NA	NA	chr7	155674426	155674427	CGI-N-Shore	CGI-Shore	FALSE	FALSE	TRUE	0.780532	1.53523	0.627536	0.736912
cg00624564	84740	AFAP1-AS1	chr4	7768660	7768661	CGI-S-Shore	CGI-Shore	FALSE	TRUE	FALSE	2.49172	3.79488	0.833115	0.920463
cg00624564	60312	AFAP1	chr4	7768660	7768661	CGI-S-Shore	CGI-Shore	FALSE	TRUE	FALSE	2.49172	3.79488	0.833115	0.920463
cg00625110	79068	FTO	chr16	53741731	53741732	CGI-S-Shelf	CGI-Shelf	FALSE	TRUE	FALSE	1.30456	2.33662	0.705269	0.82942
cg00626515	56937	PMEPA1	chr20	56287004	56287005	CGI-S-Shore	CGI-Shore	TRUE	FALSE	FALSE	0.916833	2.11959	0.651704	0.797643
cg00627045	388336	SHISA6	chr17	11461244	11461245	CGI	CGI	FALSE	TRUE	FALSE	0.366076	2.35035	0.561755	0.830819
cg00631327	64478	CSMD1	chr8	3965218	3965219	CGI	CGI	FALSE	TRUE	FALSE	-2.68566	-1.36934	0.135461	0.291855
cg00634483	NA	NA	chr8	49470964	49470965	CGI-S-Shore	CGI-Shore	FALSE	FALSE	TRUE	0.589101	1.84349	0.599574	0.764157
cg00636527	2870	GRK6	chr5	176859356	176859357	CGI-N-Shore	CGI-Shore	FALSE	TRUE	FALSE	0.659811	1.8164	0.606426	0.759686
cg00638073	NA	NA	chr22	19113955	19113956	CGI-S-Shelf	CGI-Shelf	FALSE	FALSE	TRUE	-0.375832	0.596047	0.436464	0.599391
cg00640253	23051	ZHX3	chr20	39944425	39944426	CGI-N-Shore	CGI-Shore	FALSE	TRUE	FALSE	-1.11921	1.85026	0.318054	0.754982
cg00640376	407002	MIR219-1	chr6	33173927	33173928	CGI-S-Shore	CGI-Shore	TRUE	TRUE	FALSE	0.182688	2.28791	0.52976	0.805985
cg00640376	7923	HSD17B8	chr6	33173927	33173928	CGI-S-Shore	CGI-Shore	TRUE	TRUE	FALSE	0.182688	2.28791	0.52976	0.805985
cg00640825	8522	GAS7	chr17	10086882	10086883	Non-CGI	Non-CGI	FALSE	TRUE	FALSE	2.47487	3.71496	0.839073	0.925902
cg00642679	54665	RSBN1	chr1	114355693	114355694	CGI-S-Shore	CGI-Shore	TRUE	FALSE	FALSE	0.120712	1.19426	0.520785	0.689016
cg00642970	157381	LINC00964	chr8	125953928	125953929	Non-CGI	Non-CGI	TRUE	TRUE	FALSE	-2.00434	-1.01022	0.20203	0.346022
cg00644103	21	ABCA3	chr16	2334337	2334338	CGI	CGI	FALSE	TRUE	FALSE	0.287944	1.58529	0.549186	0.738891
cg00644351	6001	RGS10	chr10	121271840	121271841	CGI	CGI	FALSE	TRUE	FALSE	0.559701	2.85641	0.593278	0.862837
cg00644554	1840	DTX1	chr12	113531465	113531466	CGI	CGI	FALSE	TRUE	FALSE	0.442929	1.38605	0.574751	0.715609
cg00654448	NA	NA	chr8	142365315	142365316	CGI-N-Shore	CGI-Shore	FALSE	FALSE	TRUE	-0.320107	1.46796	0.446737	0.725264
cg00654657	9890	LPPR4	chr1	99728691	99728692	CGI-N-Shore	CGI-Shore	TRUE	FALSE	FALSE	0.774287	1.53165	0.627382	0.724481
cg00657674	131368	ZPLD1	chr3	102198240	102198241	Non-CGI	Non-CGI	FALSE	TRUE	FALSE	1.07825	1.88992	0.671395	0.78464
cg00658405	339366	ADAMTSL5	chr19	1510500	1510501	CGI-S-Shelf	CGI-Shelf	FALSE	TRUE	FALSE	-0.560945	1.498	0.405276	0.71219
cg00658743	NA	NA	chr2	620044	620045	CGI-N-Shore	CGI-Shore	FALSE	FALSE	TRUE	-2.21083	-1.22163	0.181788	0.313441
cg00660272	1269	CNR2	chr1	24231353	24231354	CGI-S-Shore	CGI-Shore	FALSE	TRUE	FALSE	-1.65771	-0.746273	0.244507	0.380437
cg00660452	8208	CHAF1B	chr21	37756397	37756398	CGI-N-Shore	CGI-Shore	TRUE	FALSE	FALSE	0.16149	1.13478	0.527306	0.673691
cg00661777	5294	PIK3CG	chr7	106511741	106511742	CGI-S-Shelf	CGI-Shelf	FALSE	TRUE	FALSE	1.84861	2.57576	0.778963	0.848491
cg00664446	154089	MGC34034	chr6	134141554	134141555	Non-CGI	Non-CGI	TRUE	TRUE	FALSE	2.64668	3.46026	0.858103	0.91381
cg00665650	51247	PAIP2	chr5	138676787	138676788	CGI-N-Shore	CGI-Shore	TRUE	FALSE	FALSE	0.60079	1.381	0.601669	0.709916
cg00666696	NA	NA	chr7	157319754	157319755	CGI	CGI	FALSE	FALSE	TRUE	0.559178	1.39189	0.594054	0.715544
cg00667315	NA	NA	chr12	295951	295952	CGI-N-Shore	CGI-Shore	FALSE	FALSE	TRUE	1.2836	2.3143	0.704677	0.823978
cg00670552	NA	NA	chr12	131750193	131750194	CGI	CGI	FALSE	FALSE	TRUE	1.15886	1.86577	0.683999	0.776113
cg00679184	NA	NA	chr14	75447722	75447723	CGI	CGI	FALSE	FALSE	TRUE	-3.07508	-2.0669	0.107479	0.211249
cg00682002	375616	KCP	chr7	128531479	128531480	CGI	CGI	FALSE	TRUE	FALSE	-0.441823	0.366351	0.427239	0.560064
cg00683329	NA	NA	chr18	77545136	77545137	CGI	CGI	FALSE	FALSE	TRUE	-1.70142	-0.554223	0.245643	0.410715
cg00683496	6641	SNTB1	chr8	121575063	121575064	Non-CGI	Non-CGI	FALSE	TRUE	FALSE	1.37658	2.6489	0.717181	0.841574
cg00683980	4308	TRPM1	chr15	31383719	31383720	CGI-S-Shelf	CGI-Shelf	FALSE	TRUE	FALSE	1.31765	2.03195	0.703612	0.791464
cg00684283	1397	CRIP2	chr14	105943425	105943426	CGI-S-Shore	CGI-Shore	TRUE	TRUE	FALSE	-2.23095	-1.53345	0.180736	0.273418
cg00685614	NA	NA	chr16	89118838	89118839	CGI	CGI	FALSE	TRUE	FALSE	-0.934194	0.789422	0.363914	0.614767
cg00686404	197021	LCTL	chr15	66858212	66858213	Non-CGI	Non-CGI	TRUE	FALSE	FALSE	-2.10284	0.0938868	0.19292	0.519015
cg00686823	131601	TPRA1	chr3	127311038	127311039	CGI-S-Shore	CGI-Shore	TRUE	FALSE	FALSE	1.00463	3.1131	0.661229	0.88349
cg00688246	NA	NA	chr3	174362756	174362757	Non-CGI	Non-CGI	FALSE	TRUE	FALSE	2.16525	2.96211	0.805957	0.870273
cg00689010	1314	COPA	chr1	160311893	160311894	CGI-N-Shore	CGI-Shore	TRUE	TRUE	FALSE	-0.133595	1.1105	0.481672	0.672049
cg00689010	23385	NCSTN	chr1	160311893	160311894	CGI-N-Shore	CGI-Shore	TRUE	TRUE	FALSE	-0.133595	1.1105	0.481672	0.672049
cg00689534	5923	RASGRF1	chr15	79282030	79282031	Non-CGI	Non-CGI	FALSE	TRUE	FALSE	0.678625	2.44991	0.610131	0.81623
cg00690280	280664	WFDC10B	chr20	44332733	44332734	Non-CGI	Non-CGI	FALSE	TRUE	FALSE	-0.970256	0.254163	0.346383	0.542979
cg00690280	164237	WFDC13	chr20	44332733	44332734	Non-CGI	Non-CGI	FALSE	TRUE	FALSE	-0.970256	0.254163	0.346383	0.542979
cg00690901	220965	FAM13C	chr10	61043150	61043151	Non-CGI	Non-CGI	FALSE	TRUE	FALSE	2.4227	3.29748	0.833215	0.902006
cg00693157	221223	CES5A	chr16	55910494	55910495	Non-CGI	Non-CGI	TRUE	TRUE	FALSE	2.14445	2.75774	0.808677	0.861944
cg00695821	7881	KCNAB1	chr3	156124891	156124892	Non-CGI	Non-CGI	FALSE	TRUE	FALSE	1.92562	2.56742	0.785586	0.851714
cg00697486	80003	PCNXL2	chr1	233224593	233224594	Non-CGI	Non-CGI	FALSE	TRUE	FALSE	1.59428	2.36471	0.746671	0.831204
cg00697916	9223	MAGI1	chr3	65342644	65342645	CGI	CGI	FALSE	TRUE	FALSE	-0.738035	0.4514	0.382309	0.570632
cg00698602	353274	ZNF445	chr3	44481324	44481325	Non-CGI	Non-CGI	FALSE	TRUE	FALSE	-0.723853	1.35392	0.378734	0.702137
cg00700782	NA	NA	chr16	85312474	85312475	Non-CGI	Non-CGI	FALSE	FALSE	TRUE	0.480505	1.65768	0.580502	0.741993
cg00702126	64856	VWA1	chr1	1369793	1369794	CGI	CGI	TRUE	FALSE	FALSE	0.0114853	0.930749	0.501733	0.645644
cg00702638	56992	KIF15	chr3	44803293	44803294	CGI	CGI	TRUE	FALSE	FALSE	-4.11441	-2.33575	0.0551305	0.185121
cg00702638	57456	KIAA1143	chr3	44803293	44803294	CGI	CGI	TRUE	FALSE	FALSE	-4.11441	-2.33575	0.0551305	0.185121
cg00705508	NA	NA	chr21	46798397	46798398	CGI-N-Shore	CGI-Shore	FALSE	FALSE	TRUE	-0.913567	0.943246	0.348658	0.641628
cg00705894	55769	ZNF83	chr19	53189507	53189508	CGI-N-Shelf	CGI-Shelf	FALSE	TRUE	FALSE	0.687099	1.6108	0.610025	0.740469
cg00706302	84639	IL1F10	chr2	113832957	113832958	Non-CGI	Non-CGI	FALSE	TRUE	FALSE	1.10502	2.00889	0.676573	0.794632
cg00706966	5153	PDE1B	chr12	54965787	54965788	Non-CGI	Non-CGI	FALSE	TRUE	FALSE	0.351092	1.15123	0.558563	0.686261
cg00706994	219981	OR5A2	chr11	59190310	59190311	Non-CGI	Non-CGI	TRUE	FALSE	FALSE	-1.17067	0.0526027	0.319491	0.508745
cg00707129	79582	SPAG16	chr2	214713472	214713473	Non-CGI	Non-CGI	FALSE	TRUE	FALSE	-0.370329	0.688534	0.437393	0.608246
cg00707777	7086	TKT	chr3	53290340	53290341	CGI-S-Shore	CGI-Shore	TRUE	FALSE	FALSE	0.0673639	1.35076	0.510616	0.699636
cg00709966	NA	NA	chr7	27253143	27253144	CGI	CGI	FALSE	FALSE	TRUE	2.92737	3.8873	0.873064	0.932828
cg00710180	NA	NA	chr2	95723453	95723454	CGI-N-Shore	CGI-Shore	FALSE	FALSE	TRUE	-1.35845	-0.278711	0.283313	0.453685
cg00712280	51283	BFAR	chr16	14761386	14761387	Non-CGI	Non-CGI	FALSE	TRUE	FALSE	1.60825	2.63139	0.738223	0.825159
cg00714377	84174	SLA2	chr20	35274715	35274716	Non-CGI	Non-CGI	TRUE	FALSE	FALSE	-2.25662	-0.695589	0.17424	0.391145
cg00715696	23199	GSE1	chr16	85660534	85660535	CGI	CGI	FALSE	TRUE	FALSE	-0.60816	1.34537	0.397717	0.686595
cg00718336	11259	FILIP1L	chr3	99742090	99742091	Non-CGI	Non-CGI	FALSE	TRUE	FALSE	-2.28217	-1.4645	0.171663	0.273384
cg00718336	84319	CMSS1	chr3	99742090	99742091	Non-CGI	Non-CGI	FALSE	TRUE	FALSE	-2.28217	-1.4645	0.171663	0.273384
cg00719668	NA	NA	chr20	34541013	34541014	CGI-N-Shore	CGI-Shore	FALSE	FALSE	TRUE	0.199734	1.46072	0.532141	0.72285
cg00720822	NA	NA	chr8	24798430	24798431	CGI-N-Shore	CGI-Shore	FALSE	FALSE	TRUE	2.26451	3.15666	0.819533	0.89342
cg00722081	NA	NA	chr10	61147668	61147669	Non-CGI	Non-CGI	FALSE	FALSE	TRUE	-2.68206	-1.6166	0.136224	0.265166
cg00723017	654463	FER1L6	chr8	124953650	124953651	Non-CGI	Non-CGI	FALSE	TRUE	FALSE	-0.927063	-0.24128	0.350998	0.463395
cg00723275	7520	XRCC5	chr2	216973091	216973092	CGI-N-Shore	CGI-Shore	TRUE	FALSE	FALSE	0.888892	1.55361	0.646918	0.734583
cg00727310	3667	IRS1	chr2	227662704	227662705	CGI	CGI	TRUE	FALSE	FALSE	0.260434	2.81154	0.546744	0.845839
cg00730077	NA	NA	chr6	168068881	168068882	CGI	CGI	FALSE	TRUE	FALSE	-2.21355	1.48845	0.181019	0.70487
cg00730780	57608	KIAA1462	chr10	30316187	30316188	CGI	CGI	FALSE	TRUE	FALSE	1.14449	2.05761	0.678271	0.794149
cg00730820	9064	MAP3K6	chr1	27694390	27694391	CGI-S-Shore	CGI-Shore	TRUE	FALSE	FALSE	1.19354	1.88326	0.692106	0.777156
cg00732378	NA	NA	chr16	55021073	55021074	Non-CGI	Non-CGI	FALSE	FALSE	TRUE	-0.091234	0.575696	0.484605	0.595408
cg00735454	121838	LINC00284	chr13	44595496	44595497	Non-CGI	Non-CGI	TRUE	FALSE	FALSE	0.782338	2.03616	0.629853	0.789403
cg00737978	753	LDLRAD4	chr18	13611807	13611808	CGI	CGI	TRUE	TRUE	FALSE	-2.13444	-0.813451	0.188682	0.374824
cg00739471	87	ACTN1	chr14	69415588	69415589	Non-CGI	Non-CGI	FALSE	TRUE	FALSE	-1.0229	0.356639	0.33167	0.558836
cg00740088	NA	NA	chr18	19745316	19745317	CGI	CGI	FALSE	FALSE	TRUE	-0.371205	0.981544	0.437683	0.641548
cg00741954	2762	GMDS	chr6	1766046	1766047	CGI	CGI	FALSE	TRUE	FALSE	1.16597	2.86912	0.684909	0.857702
cg00741992	51333	ZNF771	chr16	30432687	30432688	CGI-S-Shelf	CGI-Shelf	FALSE	TRUE	FALSE	1.00256	1.9981	0.658298	0.793371
cg00742465	NA	NA	chr6	66800878	66800879	CGI-N-Shelf	CGI-Shelf	FALSE	FALSE	TRUE	-0.50878	0.659122	0.417895	0.6039
cg00742649	7494	XBP1	chr22	29190731	29190732	Non-CGI	Non-CGI	FALSE	TRUE	FALSE	0.918078	1.69692	0.648321	0.756122
cg00743354	80731	THSD7B	chr2	137935851	137935852	Non-CGI	Non-CGI	FALSE	TRUE	FALSE	3.29651	4.13011	0.893759	0.944972
cg00744172	NA	NA	chr10	54643889	54643890	CGI-N-Shore	CGI-Shore	FALSE	FALSE	TRUE	-0.0159305	1.59259	0.496294	0.738409
cg00744431	170394	PWWP2B	chr10	134226547	134226548	CGI	CGI	FALSE	TRUE	FALSE	0.467793	1.93791	0.576572	0.778056
cg00748431	1134	CHRNA1	chr2	175629917	175629918	Non-CGI	Non-CGI	TRUE	TRUE	FALSE	1.26895	1.98374	0.699241	0.783602
cg00748492	64215	DNAJC1	chr10	22216446	22216447	Non-CGI	Non-CGI	FALSE	TRUE	FALSE	1.19766	3.41535	0.688147	0.903632
cg00748589	NA	NA	chr12	11653486	11653487	CGI	CGI	FALSE	FALSE	TRUE	-1.72328	-0.811125	0.235289	0.36767
cg00749323	7594	ZNF43	chr19	22014817	22014818	CGI-N-Shelf	CGI-Shelf	FALSE	TRUE	FALSE	3.30813	3.9232	0.9006	0.937545
cg00751021	117583	PARD3B	chr2	206474068	206474069	Non-CGI	Non-CGI	FALSE	TRUE	FALSE	-0.823477	-0.0570681	0.364694	0.484993
cg00758701	NA	NA	chr13	49879718	49879719	Non-CGI	Non-CGI	FALSE	FALSE	TRUE	2.59762	3.37947	0.852171	0.909799
cg00759058	5799	PTPRN2	chr7	158032120	158032121	CGI	CGI	FALSE	TRUE	FALSE	1.96347	2.73441	0.793889	0.865132
cg00759329	23266	LPHN2	chr1	82208723	82208724	Non-CGI	Non-CGI	FALSE	TRUE	FALSE	-0.8054	0.230058	0.366864	0.526369
cg00760014	126917	IFFO2	chr1	19267827	19267828	Non-CGI	Non-CGI	FALSE	TRUE	FALSE	-1.75069	0.400122	0.234829	0.559167
cg00760203	100131347	LOC100131347	chr17	37254921	37254922	Non-CGI	Non-CGI	FALSE	TRUE	FALSE	0.96909	2.68033	0.649569	0.851359
cg00760203	57125	PLXDC1	chr17	37254921	37254922	Non-CGI	Non-CGI	FALSE	TRUE	FALSE	0.96909	2.68033	0.649569	0.851359
cg00761242	26100	WIPI2	chr7	5254009	5254010	CGI-N-Shelf	CGI-Shelf	TRUE	TRUE	FALSE	2.32136	3.22434	0.828578	0.887636
cg00762029	3660	IRF2	chr4	185317438	185317439	Non-CGI	Non-CGI	FALSE	TRUE	FALSE	2.45461	3.7119	0.839032	0.91516
cg00763223	1600	DAB1	chr1	58257201	58257202	Non-CGI	Non-CGI	FALSE	TRUE	FALSE	0.966366	1.58506	0.657654	0.742099
cg00763510	NA	NA	chr14	88602681	88602682	Non-CGI	Non-CGI	TRUE	FALSE	FALSE	1.31121	2.91342	0.69956	0.877907
cg00764093	2768	GNA12	chr7	2851991	2851992	CGI-N-Shelf	CGI-Shelf	FALSE	TRUE	FALSE	-0.42533	1.49581	0.427727	0.720769
cg00765233	23677	SH3BP4	chr2	235877260	235877261	Non-CGI	Non-CGI	FALSE	TRUE	FALSE	-1.91154	2.37673	0.213352	0.797828
cg00765312	8092	ALX1	chr12	85674694	85674695	CGI	CGI	FALSE	TRUE	FALSE	-2.65469	-1.61561	0.141414	0.254205
cg00768179	54206	ERRFI1	chr1	8083892	8083893	CGI-N-Shore	CGI-Shore	FALSE	TRUE	FALSE	-0.964564	0.428643	0.34976	0.566433
cg00770317	NA	NA	chr10	13424911	13424912	CGI	CGI	FALSE	FALSE	TRUE	-2.9495	-2.07141	0.11653	0.211225
cg00770443	9671	WSCD2	chr12	108611845	108611846	Non-CGI	Non-CGI	FALSE	TRUE	FALSE	-0.341315	0.323526	0.444115	0.554059
cg00770784	10428	CFDP1	chr16	75468297	75468298	CGI	CGI	TRUE	FALSE	FALSE	-3.20444	-2.06758	0.0990001	0.208704
cg00771217	9407	TMPRSS11D	chr4	68699819	68699820	Non-CGI	Non-CGI	TRUE	TRUE	FALSE	1.10863	2.54076	0.668229	0.845354
cg00771217	550112	UBA6-AS1	chr4	68699819	68699820	Non-CGI	Non-CGI	TRUE	TRUE	FALSE	1.10863	2.54076	0.668229	0.845354
cg00772192	154664	ABCA13	chr7	48552817	48552818	Non-CGI	Non-CGI	FALSE	TRUE	FALSE	-0.308527	0.445326	0.449655	0.574436
cg00773902	2657	GDF1	chr19	19007324	19007325	CGI	CGI	TRUE	TRUE	FALSE	-2.77728	-2.12243	0.128226	0.195542
cg00773902	10715	CERS1	chr19	19007324	19007325	CGI	CGI	TRUE	TRUE	FALSE	-2.77728	-2.12243	0.128226	0.195542
cg00774300	10102	TSFM	chr12	58190734	58190735	Non-CGI	Non-CGI	FALSE	TRUE	FALSE	1.74073	2.49885	0.764046	0.84221
cg00774437	NA	NA	chr12	7939674	7939675	Non-CGI	Non-CGI	FALSE	FALSE	TRUE	-0.897305	0.283569	0.351498	0.54561
cg00777636	11332	ACOT7	chr1	6446216	6446217	Non-CGI	Non-CGI	TRUE	TRUE	FALSE	1.51016	3.01623	0.712303	0.851166
cg00777805	6943	TCF21	chr6	134214649	134214650	CGI-S-Shore	CGI-Shore	TRUE	TRUE	FALSE	-0.52749	0.458835	0.415223	0.571497
cg00778190	NA	NA	chr1	95068029	95068030	Non-CGI	Non-CGI	FALSE	FALSE	TRUE	0.0402482	1.33101	0.506541	0.70382
cg00779206	2288	FKBP4	chr12	2914519	2914520	Non-CGI	Non-CGI	FALSE	TRUE	FALSE	-1.5813	-0.34542	0.253408	0.444046
cg00779313	22884	WDR37	chr10	1166994	1166995	CGI	CGI	FALSE	TRUE	FALSE	2.43406	3.41595	0.83678	0.906651
cg00779476	7148	TNXB	chr6	32063726	32063727	CGI	CGI	FALSE	TRUE	FALSE	1.33675	2.40275	0.71143	0.832584
cg00781110	57611	ISLR2	chr15	74421535	74421536	CGI	CGI	TRUE	FALSE	FALSE	-2.46959	0.122856	0.15939	0.522667
cg00781110	283731	LOC283731	chr15	74421535	74421536	CGI	CGI	TRUE	FALSE	FALSE	-2.46959	0.122856	0.15939	0.522667
cg00781378	22871	NLGN1	chr3	173999704	173999705	Non-CGI	Non-CGI	FALSE	TRUE	FALSE	2.393	3.50451	0.831564	0.914881
cg00782828	NA	NA	chr1	54940382	54940383	CGI-N-Shore	CGI-Shore	FALSE	FALSE	TRUE	-0.589514	0.0287177	0.399929	0.504946
cg00785620	8814	CDKL1	chr14	50811942	50811943	Non-CGI	Non-CGI	FALSE	TRUE	FALSE	0.558113	1.80508	0.59162	0.761554
cg00788760	85352	KIAA1644	chr22	44682494	44682495	Non-CGI	Non-CGI	FALSE	TRUE	FALSE	-0.592985	0.371933	0.402091	0.556426
cg00790071	3554	IL1R1	chr2	102731407	102731408	Non-CGI	Non-CGI	FALSE	TRUE	FALSE	0.0710708	1.22201	0.512692	0.688018
cg00790371	NA	NA	chr4	13527710	13527711	CGI-S-Shore	CGI-Shore	FALSE	FALSE	TRUE	2.38201	3.27638	0.8304	0.904673
cg00791074	25902	MTHFD1L	chr6	151186169	151186170	CGI-N-Shore	CGI-Shore	TRUE	FALSE	FALSE	0.0723463	1.25926	0.512128	0.66469
cg00791430	NA	NA	chr14	104979474	104979475	Non-CGI	Non-CGI	TRUE	FALSE	FALSE	-2.10765	-0.726229	0.189472	0.385277
cg00792015	729582	DIRC3	chr2	218466469	218466470	Non-CGI	Non-CGI	TRUE	TRUE	FALSE	-1.00415	0.312208	0.337334	0.553277
cg00792107	100507055	LRCOL1	chr12	133181600	133181601	CGI-S-Shore	CGI-Shore	FALSE	TRUE	FALSE	-0.348569	0.643237	0.447621	0.609131
cg00792184	8110	DPF3	chr14	73355148	73355149	CGI-N-Shelf	CGI-Shelf	FALSE	TRUE	FALSE	-0.355028	1.74913	0.439696	0.748136
cg00792271	NA	NA	chr5	62074572	62074573	Non-CGI	Non-CGI	FALSE	FALSE	TRUE	0.785977	3.21095	0.625817	0.87883
cg00792968	NA	NA	chr13	22635873	22635874	CGI-N-Shore	CGI-Shore	FALSE	TRUE	FALSE	0.190712	1.57082	0.5326	0.728425
cg00793186	9542	NRG2	chr5	139283100	139283101	CGI-N-Shore	CGI-Shore	FALSE	TRUE	FALSE	0.568553	1.50224	0.593795	0.722314
cg00796611	23380	SRGAP2	chr1	206603444	206603445	Non-CGI	Non-CGI	FALSE	TRUE	FALSE	-0.365631	1.29167	0.439002	0.693981
cg00804354	80851	SH3BP5L	chr1	249111407	249111408	Non-CGI	Non-CGI	FALSE	TRUE	FALSE	2.46686	3.46963	0.838553	0.912564
cg00804600	NA	NA	chr6	13362315	13362316	CGI-N-Shelf	CGI-Shelf	TRUE	FALSE	FALSE	2.36159	3.4756	0.832028	0.909789
cg00806929	NA	NA	chr16	62700011	62700012	Non-CGI	Non-CGI	FALSE	FALSE	TRUE	2.02816	2.79976	0.796911	0.871929
cg00808687	NA	NA	chr1	212285635	212285636	Non-CGI	Non-CGI	FALSE	FALSE	TRUE	0.994983	3.42828	0.649672	0.903186
cg00809164	4489	MT1A	chr16	56651049	56651050	CGI	CGI	TRUE	TRUE	FALSE	-1.59397	-0.944373	0.250709	0.353293
cg00809164	4499	MT1M	chr16	56651049	56651050	CGI	CGI	TRUE	TRUE	FALSE	-1.59397	-0.944373	0.250709	0.353293
cg00809164	4500	MT1L	chr16	56651049	56651050	CGI	CGI	TRUE	TRUE	FALSE	-1.59397	-0.944373	0.250709	0.353293
cg00811565	100132916	FAM159B	chr5	63985377	63985378	CGI-N-Shore	CGI-Shore	TRUE	FALSE	FALSE	0.583262	1.567	0.596118	0.729945
cg00813162	87	ACTN1	chr14	69443362	69443363	CGI-N-Shore	CGI-Shore	FALSE	TRUE	FALSE	-1.29196	-0.0868086	0.294038	0.487362
cg00818106	170394	PWWP2B	chr10	134221503	134221504	CGI-S-Shore	CGI-Shore	FALSE	TRUE	FALSE	-0.390109	1.1371	0.433718	0.677446
cg00820740	80114	BICC1	chr10	60274755	60274756	CGI-S-Shore	CGI-Shore	FALSE	TRUE	FALSE	0.816109	1.94281	0.622423	0.771888
cg00820919	130271	PLEKHH2	chr2	43863839	43863840	CGI-N-Shore	CGI-Shore	TRUE	FALSE	FALSE	-0.749396	0.109066	0.37828	0.511449
cg00822241	2524	FUT2	chr19	49201468	49201469	CGI-S-Shore	CGI-Shore	FALSE	TRUE	FALSE	-2.56964	-1.94256	0.145497	0.217767
cg00824222	23161	SNX13	chr7	17978107	17978108	CGI-N-Shore	CGI-Shore	FALSE	TRUE	FALSE	1.79716	2.75148	0.770744	0.854041
cg00829961	5520	PPP2R2A	chr8	25909326	25909327	CGI	CGI	FALSE	TRUE	FALSE	-2.47728	-1.36099	0.154807	0.296034
cg00831127	2048	EPHB2	chr1	23038925	23038926	CGI-S-Shore	CGI-Shore	FALSE	TRUE	FALSE	-0.174064	1.15175	0.467802	0.679677
cg00831222	84435	GPR123	chr10	134893675	134893676	CGI	CGI	FALSE	TRUE	FALSE	-1.90595	-1.23416	0.215694	0.310497
cg00831735	84985	FAM83A	chr8	124215033	124215034	CGI-N-Shelf	CGI-Shelf	TRUE	TRUE	FALSE	-2.1503	-0.673645	0.187753	0.397522
cg00831735	100131726	FAM83A-AS1	chr8	124215033	124215034	CGI-N-Shelf	CGI-Shelf	TRUE	TRUE	FALSE	-2.1503	-0.673645	0.187753	0.397522
cg00831909	10630	PDPN	chr1	13909623	13909624	CGI-N-Shore	CGI-Shore	TRUE	FALSE	FALSE	1.49914	2.70519	0.732833	0.849253
cg00832105	NA	NA	chr8	11331707	11331708	Non-CGI	Non-CGI	FALSE	FALSE	TRUE	0.20829	2.32556	0.535678	0.801529
cg00834988	26053	AUTS2	chr7	70060153	70060154	CGI-N-Shore	CGI-Shore	FALSE	TRUE	FALSE	2.01093	3.05286	0.79751	0.885349
cg00836101	7057	THBS1	chr15	39876248	39876249	CGI-S-Shelf	CGI-Shelf	FALSE	TRUE	FALSE	-0.385445	0.973116	0.435542	0.654409
cg00837734	23174	ZCCHC14	chr16	87451234	87451235	CGI	CGI	FALSE	TRUE	FALSE	2.73128	3.50021	0.862893	0.907557
cg00840310	80036	TRPM3	chr9	74061514	74061515	CGI	CGI	FALSE	TRUE	FALSE	-3.34922	-2.50238	0.090833	0.158447
cg00841725	23263	MCF2L	chr13	113655538	113655539	CGI-S-Shore	CGI-Shore	TRUE	TRUE	FALSE	-1.42962	-0.575668	0.272603	0.403353
cg00849854	146691	TOM1L2	chr17	17780937	17780938	Non-CGI	Non-CGI	FALSE	TRUE	FALSE	-2.39233	-1.4918	0.161444	0.264973
cg00849990	1875	E2F5	chr8	86090773	86090774	CGI-S-Shore	CGI-Shore	FALSE	TRUE	FALSE	-0.00339321	0.611937	0.499099	0.593861
cg00850332	84310	C7orf50	chr7	1141971	1141972	CGI	CGI	FALSE	TRUE	FALSE	-0.42275	0.963918	0.428292	0.631022
cg00850552	6612	SUMO3	chr21	46236351	46236352	CGI-N-Shore	CGI-Shore	FALSE	TRUE	FALSE	0.896703	2.16556	0.645155	0.790421
cg00850821	29799	YPEL1	chr22	22089417	22089418	CGI-N-Shore	CGI-Shore	FALSE	TRUE	FALSE	-2.3533	-1.63445	0.166034	0.257721
cg00851389	4498	MT1JP	chr16	56669681	56669682	CGI	CGI	TRUE	TRUE	FALSE	1.97242	3.72976	0.760884	0.92707
cg00851389	4489	MT1A	chr16	56669681	56669682	CGI	CGI	TRUE	TRUE	FALSE	1.97242	3.72976	0.760884	0.92707
cg00855466	218	ALDH3A1	chr17	19652056	19652057	CGI-S-Shore	CGI-Shore	TRUE	FALSE	FALSE	-1.82491	-0.423255	0.225424	0.435351
cg00856336	NA	NA	chr6	169399760	169399761	CGI-S-Shelf	CGI-Shelf	FALSE	FALSE	TRUE	0.501858	2.48881	0.574389	0.826267
cg00857921	7049	TGFBR3	chr1	92257380	92257381	Non-CGI	Non-CGI	FALSE	TRUE	FALSE	0.28452	1.49242	0.548188	0.71757
cg00859352	23043	TNIK	chr3	171176909	171176910	CGI-S-Shore	CGI-Shore	FALSE	TRUE	FALSE	-2.4592	-1.48816	0.155526	0.27602
cg00861772	NA	NA	chr10	134852810	134852811	CGI-S-Shore	CGI-Shore	FALSE	FALSE	TRUE	-1.29195	-0.304694	0.296913	0.45151
cg00862408	374403	TBC1D10C	chr11	67177034	67177035	CGI	CGI	FALSE	TRUE	FALSE	1.51714	2.45488	0.736858	0.839636
cg00862408	5499	PPP1CA	chr11	67177034	67177035	CGI	CGI	FALSE	TRUE	FALSE	1.51714	2.45488	0.736858	0.839636
cg00863309	51514	DTL	chr1	212226308	212226309	Non-CGI	Non-CGI	FALSE	TRUE	FALSE	2.97884	3.92879	0.872566	0.935603
cg00864012	55852	TEX2	chr17	62294665	62294666	Non-CGI	Non-CGI	FALSE	TRUE	FALSE	-0.775318	0.545816	0.374355	0.591287
cg00864334	84557	MAP1LC3A	chr20	33144897	33144898	CGI-N-Shore	CGI-Shore	TRUE	TRUE	FALSE	2.36312	3.01956	0.834355	0.880099
cg00864860	10911	UTS2	chr1	7907996	7907997	CGI-N-Shelf	CGI-Shelf	FALSE	TRUE	FALSE	-0.729883	0.686899	0.386765	0.5885
cg00868074	23174	ZCCHC14	chr16	87441555	87441556	CGI	CGI	FALSE	TRUE	FALSE	-0.427397	1.12898	0.422732	0.672469
cg00868131	NA	NA	chr1	54952901	54952902	CGI-N-Shore	CGI-Shore	FALSE	FALSE	TRUE	-1.29323	-0.0034833	0.291547	0.499004
cg00868875	284252	KCTD1	chr18	24127237	24127238	CGI	CGI	TRUE	TRUE	FALSE	1.66354	3.07741	0.732342	0.872284
cg00869941	4026	LPP	chr3	187929592	187929593	Non-CGI	Non-CGI	TRUE	TRUE	FALSE	-0.478081	0.988157	0.421886	0.659141
cg00871371	10801	2009-09-01	chr17	75371476	75371477	CGI-S-Shore	CGI-Shore	TRUE	TRUE	FALSE	-0.931799	1.48034	0.349007	0.701593
cg00872984	7148	TNXB	chr6	32063991	32063992	CGI	CGI	FALSE	TRUE	FALSE	-0.248198	2.96997	0.461777	0.843116
cg00873953	57458	TMCC3	chr12	95010048	95010049	Non-CGI	Non-CGI	TRUE	TRUE	FALSE	1.57767	2.6851	0.732067	0.852524
cg00876141	10699	CORIN	chr4	47837775	47837776	CGI-N-Shore	CGI-Shore	FALSE	TRUE	FALSE	0.537221	1.68921	0.590939	0.749314
cg00877329	60495	HPSE2	chr10	100996579	100996580	CGI	CGI	TRUE	FALSE	FALSE	-0.941931	0.469903	0.34765	0.578453
cg00881207	155185	AMZ1	chr7	2728912	2728913	CGI	CGI	FALSE	TRUE	FALSE	-2.2042	-0.363036	0.180325	0.442388
cg00882281	NA	NA	chr15	96346592	96346593	Non-CGI	Non-CGI	FALSE	FALSE	TRUE	2.39556	3.24893	0.833035	0.9009
cg00886669	NA	NA	chr2	11529264	11529265	Non-CGI	Non-CGI	FALSE	FALSE	TRUE	2.64753	3.51889	0.851777	0.914393
cg00887508	NA	NA	chr13	22425573	22425574	Non-CGI	Non-CGI	FALSE	FALSE	TRUE	-0.18028	0.824225	0.469964	0.629228
cg00888818	283480	FGF14-IT1	chr13	103019936	103019937	Non-CGI	Non-CGI	TRUE	TRUE	FALSE	0.384675	1.49149	0.563986	0.728287
cg00888818	2259	FGF14	chr13	103019936	103019937	Non-CGI	Non-CGI	TRUE	TRUE	FALSE	0.384675	1.49149	0.563986	0.728287
cg00890070	100505566	LINC00578	chr3	177451285	177451286	Non-CGI	Non-CGI	FALSE	FALSE	TRUE	2.51271	3.15231	0.845948	0.893423
cg00890363	NA	NA	chr4	13540673	13540674	CGI	CGI	FALSE	FALSE	TRUE	-0.0197568	1.27205	0.495472	0.695219
cg00891886	NA	NA	chr7	73417264	73417265	Non-CGI	Non-CGI	FALSE	FALSE	TRUE	-2.07129	-1.13455	0.200804	0.337457
cg00892255	51199	NIN	chr14	51243177	51243178	Non-CGI	Non-CGI	FALSE	TRUE	FALSE	3.01581	3.80689	0.885292	0.931986
cg00893471	3232	HOXD3	chr2	177029921	177029922	CGI	CGI	FALSE	TRUE	FALSE	-2.44028	-0.571917	0.158595	0.409536
cg00893488	NA	NA	chr6	170555108	170555109	CGI-S-Shore	CGI-Shore	FALSE	FALSE	TRUE	-0.309962	0.656323	0.448279	0.604737
cg00895997	6561	SLC13A1	chr7	122840109	122840110	Non-CGI	Non-CGI	TRUE	FALSE	FALSE	-0.885171	-0.199275	0.355451	0.466943
cg00897796	3694	ITGB6	chr2	161127463	161127464	CGI-S-Shore	CGI-Shore	FALSE	TRUE	FALSE	1.35171	2.28883	0.705391	0.820151
cg00898274	11155	LDB3	chr10	88448035	88448036	Non-CGI	Non-CGI	FALSE	TRUE	FALSE	-2.23771	1.13824	0.176772	0.662549
cg00899400	3200	HOXA3	chr7	27154537	27154538	CGI-S-Shore	CGI-Shore	FALSE	TRUE	FALSE	2.48334	3.82571	0.840128	0.93254
cg00902417	374286	CDRT1	chr17	15492168	15492169	Non-CGI	Non-CGI	FALSE	TRUE	FALSE	0.495478	1.39132	0.582124	0.71639
cg00902417	10626	TRIM16	chr17	15492168	15492169	Non-CGI	Non-CGI	FALSE	TRUE	FALSE	0.495478	1.39132	0.582124	0.71639
cg00902815	4008	LMO7	chr13	76313846	76313847	Non-CGI	Non-CGI	FALSE	TRUE	FALSE	1.64563	2.61295	0.748997	0.830524
cg00903308	NA	NA	chr7	27177068	27177069	CGI-N-Shelf	CGI-Shelf	FALSE	FALSE	TRUE	-0.598261	0.529342	0.399627	0.586162
cg00903438	389072	PLEKHM3	chr2	208756199	208756200	Non-CGI	Non-CGI	FALSE	TRUE	FALSE	2.08468	3.37378	0.804591	0.906034
cg00905524	3205	HOXA9	chr7	27206907	27206908	CGI	CGI	TRUE	TRUE	FALSE	-3.22429	-1.98966	0.100329	0.236013
cg00905524	100534589	HOXA10-HOXA9	chr7	27206907	27206908	CGI	CGI	TRUE	TRUE	FALSE	-3.22429	-1.98966	0.100329	0.236013
cg00905524	100874323	HOXA-AS4	chr7	27206907	27206908	CGI	CGI	TRUE	TRUE	FALSE	-3.22429	-1.98966	0.100329	0.236013
cg00906943	81539	SLC38A1	chr12	46663361	46663362	CGI	CGI	TRUE	FALSE	FALSE	-2.86144	-2.24879	0.123001	0.187141
cg00909094	100129480	C3orf83	chr3	12586368	12586369	Non-CGI	Non-CGI	FALSE	TRUE	FALSE	2.08095	2.97801	0.798388	0.874684
cg00909232	6539	SLC6A12	chr12	323439	323440	Non-CGI	Non-CGI	TRUE	FALSE	FALSE	-0.940166	-0.300654	0.349971	0.450085
cg00910419	53335	BCL11A	chr2	60780754	60780755	CGI	CGI	TRUE	FALSE	FALSE	-3.36681	-2.29361	0.090713	0.179387
cg00911370	284759	SIRPB2	chr20	1472098	1472099	Non-CGI	Non-CGI	TRUE	FALSE	FALSE	-0.388609	0.695422	0.43428	0.608722
cg00912573	3667	IRS1	chr2	227661291	227661292	CGI-N-Shore	CGI-Shore	TRUE	FALSE	FALSE	-0.179013	2.9083	0.472147	0.846553
cg00912772	55785	FGD6	chr12	95594566	95594567	Non-CGI	Non-CGI	FALSE	TRUE	FALSE	-1.39751	-0.753243	0.278117	0.377215
cg00914384	NA	NA	chr2	5593580	5593581	Non-CGI	Non-CGI	FALSE	FALSE	TRUE	1.74888	2.58135	0.759078	0.846982
cg00916899	63905	MANBAL	chr20	35944932	35944933	Non-CGI	Non-CGI	FALSE	TRUE	FALSE	1.05878	3.33278	0.67286	0.902052
cg00917471	64175	LEPRE1	chr1	43228316	43228317	CGI-N-Shelf	CGI-Shelf	FALSE	TRUE	FALSE	1.54785	2.77789	0.738692	0.858918
cg00918522	NA	NA	chr4	175132871	175132872	CGI	CGI	FALSE	TRUE	FALSE	-0.824836	0.288551	0.362256	0.547954
cg00921266	3200	HOXA3	chr7	27153663	27153664	CGI	CGI	FALSE	TRUE	FALSE	-1.50762	1.19258	0.275502	0.665244
cg00922378	29933	GPR132	chr14	105527251	105527252	Non-CGI	Non-CGI	FALSE	TRUE	FALSE	-0.499078	0.441876	0.416839	0.57463
cg00924004	401463	LOC401463	chr8	65490710	65490711	CGI	CGI	TRUE	TRUE	FALSE	-1.59354	0.457179	0.255667	0.574198
cg00925339	4907	NT5E	chr6	86162725	86162726	CGI-S-Shelf	CGI-Shelf	FALSE	TRUE	FALSE	-1.96693	-0.538064	0.210358	0.414064
cg00925766	55218	EXD2	chr14	69676183	69676184	Non-CGI	Non-CGI	TRUE	TRUE	FALSE	2.16299	3.05457	0.806757	0.888485
cg00926318	955	ENTPD6	chr20	25177340	25177341	CGI	CGI	TRUE	TRUE	FALSE	-0.291932	0.320172	0.450942	0.556304
cg00927624	NA	NA	chr14	88796191	88796192	CGI-S-Shelf	CGI-Shelf	FALSE	FALSE	TRUE	0.658698	1.47747	0.608585	0.730944
cg00927666	NA	NA	chr7	28319589	28319590	Non-CGI	Non-CGI	FALSE	FALSE	TRUE	-0.377146	0.849696	0.437867	0.633132
cg00928596	100126355	MIR365A	chr16	14403022	14403023	Non-CGI	Non-CGI	TRUE	FALSE	FALSE	-2.40929	1.0072	0.160179	0.649412
cg00932808	NA	NA	chr6	14211322	14211323	CGI	CGI	FALSE	FALSE	TRUE	-3.3069	-2.65869	0.0923019	0.139517
cg00933835	55821	ALLC	chr2	3705271	3705272	CGI-S-Shore	CGI-Shore	TRUE	FALSE	FALSE	0.719701	1.62823	0.618202	0.749901
cg00933859	27241	BBS9	chr7	33534876	33534877	Non-CGI	Non-CGI	FALSE	TRUE	FALSE	-1.73286	0.422868	0.232381	0.566872
cg00935043	3667	IRS1	chr2	227598603	227598604	Non-CGI	Non-CGI	FALSE	TRUE	FALSE	2.1631	3.45845	0.809504	0.901616
cg00935653	NA	NA	chr7	25897725	25897726	CGI-S-Shore	CGI-Shore	FALSE	FALSE	TRUE	2.39589	3.2109	0.834315	0.896427
cg00937286	286094	LOC286094	chr8	136245114	136245115	Non-CGI	Non-CGI	TRUE	FALSE	FALSE	0.48167	2.45318	0.57656	0.8225
cg00937510	100505894	TMEM161B-AS1	chr5	87565469	87565470	CGI	CGI	TRUE	TRUE	FALSE	-1.56426	-0.738222	0.258142	0.381938
cg00937510	153396	TMEM161B	chr5	87565469	87565470	CGI	CGI	TRUE	TRUE	FALSE	-1.56426	-0.738222	0.258142	0.381938
cg00938535	5891	MOK	chr14	102692438	102692439	CGI-S-Shelf	CGI-Shelf	FALSE	TRUE	FALSE	2.69864	3.44497	0.862001	0.906415
cg00938547	NA	NA	chr6	49916931	49916932	Non-CGI	Non-CGI	FALSE	TRUE	FALSE	0.518468	1.32314	0.585269	0.702416
cg00938619	54508	EPB41L4A-AS2	chr5	111753803	111753804	CGI-N-Shore	CGI-Shore	TRUE	TRUE	FALSE	-2.50591	-1.74508	0.158282	0.245941
cg00938619	64097	EPB41L4A	chr5	111753803	111753804	CGI-N-Shore	CGI-Shore	TRUE	TRUE	FALSE	-2.50591	-1.74508	0.158282	0.245941
cg00941258	1374	CPT1A	chr11	68611328	68611329	CGI	CGI	TRUE	FALSE	FALSE	-0.515156	0.947468	0.415374	0.643637
cg00944227	100131726	FAM83A-AS1	chr8	124215152	124215153	CGI-N-Shelf	CGI-Shelf	TRUE	TRUE	FALSE	-1.79349	-0.771603	0.226616	0.375192
cg00944227	84985	FAM83A	chr8	124215152	124215153	CGI-N-Shelf	CGI-Shelf	TRUE	TRUE	FALSE	-1.79349	-0.771603	0.226616	0.375192
cg00945108	93190	C1orf158	chr1	12806027	12806028	Non-CGI	Non-CGI	TRUE	FALSE	FALSE	-2.76285	-1.39727	0.12923	0.28958
cg00945507	23480	SEC61G	chr7	54827677	54827678	CGI-S-Shore	CGI-Shore	TRUE	FALSE	FALSE	-0.721343	0.14178	0.381479	0.518879
cg00946491	90627	STARD13	chr13	33760517	33760518	Non-CGI	Non-CGI	TRUE	TRUE	FALSE	-1.53872	1.90118	0.26004	0.759689
cg00947878	3801	KIFC3	chr16	57832005	57832006	CGI-S-Shore	CGI-Shore	TRUE	TRUE	FALSE	0.343992	0.992214	0.557731	0.658658
cg00948664	788	SLC25A20	chr3	48935316	48935317	CGI-N-Shore	CGI-Shore	FALSE	TRUE	FALSE	-0.0783782	0.900129	0.487222	0.646071
cg00949446	1370	CPN2	chr3	194072066	194072067	Non-CGI	Non-CGI	TRUE	FALSE	FALSE	-0.562885	1.85999	0.406645	0.740324
cg00950086	NA	NA	chr10	130124650	130124651	CGI	CGI	FALSE	FALSE	TRUE	1.60433	2.34882	0.743964	0.828604
cg00951869	196883	ADCY4	chr14	24805349	24805350	CGI-S-Shore	CGI-Shore	TRUE	TRUE	FALSE	0.0881574	2.39893	0.513409	0.828167
cg00951869	11035	RIPK3	chr14	24805349	24805350	CGI-S-Shore	CGI-Shore	TRUE	TRUE	FALSE	0.0881574	2.39893	0.513409	0.828167
cg00952516	157310	PEBP4	chr8	22573179	22573180	Non-CGI	Non-CGI	FALSE	TRUE	FALSE	-3.63645	-2.84424	0.0752667	0.136761
cg00954391	22982	DIP2C	chr10	612391	612392	Non-CGI	Non-CGI	FALSE	TRUE	FALSE	1.81875	2.59306	0.774358	0.849228
cg00955808	401237	CASC15	chr6	21754525	21754526	Non-CGI	Non-CGI	FALSE	TRUE	FALSE	0.577577	2.6822	0.596495	0.846254
cg00955967	NA	NA	chr4	148079717	148079718	CGI-S-Shore	CGI-Shore	FALSE	FALSE	TRUE	-1.92295	-1.27724	0.211815	0.302922
cg00956142	65979	PHACTR4	chr1	28765031	28765032	Non-CGI	Non-CGI	FALSE	TRUE	FALSE	-1.22171	-0.0411464	0.305263	0.49217
cg00958204	266629	SEC14L3	chr22	30869361	30869362	Non-CGI	Non-CGI	TRUE	FALSE	FALSE	1.81733	2.56576	0.773173	0.852524
cg00958225	55182	RNF220	chr1	44972477	44972478	Non-CGI	Non-CGI	FALSE	TRUE	FALSE	0.274614	1.72144	0.54632	0.762695
cg00958412	NA	NA	chr12	125216731	125216732	Non-CGI	Non-CGI	FALSE	FALSE	TRUE	-0.591118	2.62547	0.400407	0.820423
cg00962707	NA	NA	chr16	86715554	86715555	CGI	CGI	FALSE	FALSE	TRUE	-0.498064	1.03837	0.416359	0.643637
cg00962755	23612	PHLDA3	chr1	201439001	201439002	CGI	CGI	TRUE	FALSE	FALSE	1.22115	2.35192	0.696458	0.819087
cg00963998	NA	NA	chr6	106812783	106812784	CGI-S-Shelf	CGI-Shelf	FALSE	FALSE	TRUE	0.286149	1.64191	0.540528	0.751047
cg00965168	NA	NA	chr1	227974541	227974542	CGI	CGI	FALSE	FALSE	TRUE	0.92593	1.72323	0.648427	0.758078
cg00965578	80833	APOL3	chr22	36560801	36560802	Non-CGI	Non-CGI	TRUE	FALSE	FALSE	0.899666	2.22029	0.645974	0.809928
cg00968270	23174	ZCCHC14	chr16	87471788	87471789	CGI-S-Shore	CGI-Shore	FALSE	TRUE	FALSE	1.49476	2.92909	0.727565	0.857487
cg00968616	404093	CUEDC1	chr17	55942898	55942899	CGI-S-Shelf	CGI-Shelf	FALSE	TRUE	FALSE	-0.606048	1.6051	0.398071	0.740585
cg00968875	2159	F10	chr13	113798280	113798281	CGI-S-Shore	CGI-Shore	FALSE	TRUE	FALSE	-0.294803	0.758748	0.450795	0.626665
cg00969288	4622	MYH4	chr17	10371992	10371993	Non-CGI	Non-CGI	FALSE	TRUE	FALSE	0.589532	1.47257	0.594632	0.728626
cg00971613	2762	GMDS	chr6	1667710	1667711	Non-CGI	Non-CGI	FALSE	TRUE	FALSE	-0.192254	1.45415	0.466954	0.718279
cg00974255	NA	NA	chr17	35082656	35082657	CGI-S-Shelf	CGI-Shelf	FALSE	FALSE	TRUE	-0.781472	0.183526	0.371111	0.530532
cg00974685	NA	NA	chr10	113759413	113759414	Non-CGI	Non-CGI	FALSE	FALSE	TRUE	1.9191	2.72672	0.787672	0.864132
cg00976328	389072	PLEKHM3	chr2	208689522	208689523	CGI	CGI	FALSE	TRUE	FALSE	1.63031	2.77775	0.751931	0.860683
cg00976949	60678	EEFSEC	chr3	127950782	127950783	Non-CGI	Non-CGI	FALSE	TRUE	FALSE	1.05994	2.55849	0.674603	0.848564
cg00978783	283600	SLC25A47	chr14	100788291	100788292	CGI-S-Shelf	CGI-Shelf	TRUE	FALSE	FALSE	0.12315	1.08642	0.520489	0.675114
cg00979369	87	ACTN1	chr14	69403340	69403341	Non-CGI	Non-CGI	FALSE	TRUE	FALSE	0.762544	1.56736	0.628602	0.741841
cg00980581	285848	PNPLA1	chr6	36238095	36238096	Non-CGI	Non-CGI	TRUE	TRUE	FALSE	-2.32749	-1.33929	0.167153	0.289631
cg00980772	84931	LOC84931	chr2	121224679	121224680	CGI-S-Shore	CGI-Shore	TRUE	FALSE	FALSE	2.03592	3.34571	0.79435	0.900056
cg00981070	5590	PRKCZ	chr1	2046702	2046703	CGI	CGI	FALSE	TRUE	FALSE	-1.03796	0.530419	0.336445	0.58713
cg00981443	199834	LCE4A	chr1	152681163	152681164	Non-CGI	Non-CGI	TRUE	FALSE	FALSE	1.25868	1.96681	0.696661	0.791884
cg00984009	NA	NA	chr7	131657233	131657234	Non-CGI	Non-CGI	FALSE	FALSE	TRUE	1.00845	1.69051	0.664005	0.755471
cg00986610	NA	NA	chr16	86554580	86554581	CGI	CGI	FALSE	FALSE	TRUE	-1.22262	0.575344	0.301108	0.595418
cg00987015	1128	CHRM1	chr11	62688751	62688752	CGI-N-Shore	CGI-Shore	TRUE	FALSE	FALSE	0.0817033	0.901074	0.513727	0.635972
cg00987136	5695	PSMB7	chr9	127115791	127115792	Non-CGI	Non-CGI	TRUE	TRUE	FALSE	1.74849	2.83406	0.758772	0.856105
cg00987136	100129034	LOC100129034	chr9	127115791	127115792	Non-CGI	Non-CGI	TRUE	TRUE	FALSE	1.74849	2.83406	0.758772	0.856105
cg00988256	26526	TSPAN16	chr19	11406173	11406174	CGI-S-Shore	CGI-Shore	TRUE	FALSE	FALSE	2.63516	3.60233	0.85469	0.91408
cg00989229	NA	NA	chr16	85989874	85989875	CGI-N-Shore	CGI-Shore	FALSE	FALSE	TRUE	-1.2938	0.563185	0.301099	0.591764
cg00991744	29951	PDZRN4	chr12	41581484	41581485	CGI-N-Shore	CGI-Shore	TRUE	FALSE	FALSE	1.82497	2.7045	0.762181	0.855286
cg00991848	6187	RPS2	chr16	2014270	2014271	CGI	CGI	TRUE	TRUE	FALSE	-1.91341	-0.875561	0.212524	0.361567
cg00991848	26784	SNORA64	chr16	2014270	2014271	CGI	CGI	TRUE	TRUE	FALSE	-1.91341	-0.875561	0.212524	0.361567
cg00991848	735301	SNHG9	chr16	2014270	2014271	CGI	CGI	TRUE	TRUE	FALSE	-1.91341	-0.875561	0.212524	0.361567
cg00991848	677844	SNORA78	chr16	2014270	2014271	CGI	CGI	TRUE	TRUE	FALSE	-1.91341	-0.875561	0.212524	0.361567
cg00991848	574042	SNORA10	chr16	2014270	2014271	CGI	CGI	TRUE	TRUE	FALSE	-1.91341	-0.875561	0.212524	0.361567
cg00995065	10599	SLCO1B1	chr12	21283725	21283726	Non-CGI	Non-CGI	TRUE	FALSE	FALSE	0.236163	1.02385	0.540171	0.666038
cg00995253	NA	NA	chr10	134853181	134853182	CGI-S-Shore	CGI-Shore	FALSE	FALSE	TRUE	-1.38633	-0.61373	0.277652	0.398745
cg00995854	922	CD5L	chr1	157802305	157802306	Non-CGI	Non-CGI	FALSE	TRUE	FALSE	0.915182	2.47433	0.645791	0.841904
cg00995893	NA	NA	chr13	45676585	45676586	Non-CGI	Non-CGI	FALSE	FALSE	TRUE	1.58711	2.59995	0.740503	0.850353
cg00997130	NA	NA	chr3	10854266	10854267	CGI-N-Shelf	CGI-Shelf	FALSE	FALSE	TRUE	-0.744692	0.292405	0.376711	0.548248
cg00997338	131405	TRIM71	chr3	32862830	32862831	CGI-S-Shore	CGI-Shore	FALSE	TRUE	FALSE	2.26295	3.22167	0.81902	0.89795
cg01000422	5257	PHKB	chr16	47677874	47677875	Non-CGI	Non-CGI	FALSE	TRUE	FALSE	2.85014	3.55825	0.873416	0.917347
cg01003815	11172	INSL6	chr9	5184060	5184061	CGI-N-Shore	CGI-Shore	FALSE	TRUE	FALSE	0.948396	1.93086	0.655712	0.781196
cg01004063	NA	NA	chr14	88606476	88606477	Non-CGI	Non-CGI	TRUE	FALSE	FALSE	-1.80172	-0.832159	0.230009	0.366742
cg01005211	NA	NA	chr3	72338583	72338584	Non-CGI	Non-CGI	FALSE	FALSE	TRUE	-2.28714	-0.0506662	0.17102	0.496865
cg01006126	390664	C1QTNF8	chr16	1146445	1146446	CGI	CGI	TRUE	FALSE	FALSE	0.138083	1.60206	0.523296	0.717431
cg01008154	8503	PIK3R3	chr1	46509395	46509396	Non-CGI	Non-CGI	FALSE	TRUE	FALSE	0.714935	1.59379	0.619912	0.738518
cg01008256	7205	TRIP6	chr7	100463985	100463986	CGI	CGI	TRUE	TRUE	FALSE	-0.271776	0.584343	0.455041	0.5848
cg01008256	56996	SLC12A9	chr7	100463985	100463986	CGI	CGI	TRUE	TRUE	FALSE	-0.271776	0.584343	0.455041	0.5848
cg01012082	10499	NCOA2	chr8	71025759	71025760	Non-CGI	Non-CGI	FALSE	TRUE	FALSE	-1.94883	0.0271451	0.218345	0.506645
cg01012134	NA	NA	chr5	130207034	130207035	Non-CGI	Non-CGI	FALSE	FALSE	TRUE	-1.34783	-0.574227	0.287077	0.40609
cg01013171	NA	NA	chr14	75716369	75716370	Non-CGI	Non-CGI	FALSE	FALSE	TRUE	-0.0655236	2.21727	0.488441	0.784802
cg01015123	131149	OTOL1	chr3	161214690	161214691	Non-CGI	Non-CGI	TRUE	FALSE	FALSE	-1.11026	-0.375023	0.325289	0.437618
cg01015401	NA	NA	chr4	129630613	129630614	Non-CGI	Non-CGI	FALSE	FALSE	TRUE	1.95978	2.84644	0.789929	0.870001
cg01019188	1607	DGKB	chr7	14809526	14809527	Non-CGI	Non-CGI	FALSE	TRUE	FALSE	1.49258	2.44239	0.726815	0.836949
cg01019875	162515	SLC16A11	chr17	6945620	6945621	CGI	CGI	FALSE	TRUE	FALSE	-2.55483	-0.911963	0.15189	0.356731
cg01020263	64127	NOD2	chr16	50732073	50732074	Non-CGI	Non-CGI	FALSE	TRUE	FALSE	-1.57869	-0.431541	0.25225	0.430233
cg01022780	5210	PFKFB4	chr3	48598236	48598237	CGI-S-Shelf	CGI-Shelf	FALSE	TRUE	FALSE	-1.03894	-0.245766	0.328528	0.460211
cg01023967	NA	NA	chr14	87040761	87040762	Non-CGI	Non-CGI	FALSE	FALSE	TRUE	-0.43578	2.1012	0.428994	0.787731
cg01024444	3036	HAS1	chr19	52222446	52222447	CGI-N-Shore	CGI-Shore	TRUE	TRUE	FALSE	-0.435157	1.43469	0.426765	0.712814
cg01024618	133923	ZNF474	chr5	121478928	121478929	Non-CGI	Non-CGI	FALSE	TRUE	FALSE	3.41072	4.03383	0.909368	0.941071
cg01026233	NA	NA	chr2	206713941	206713942	Non-CGI	Non-CGI	FALSE	FALSE	TRUE	0.391702	1.80586	0.561502	0.774349
cg01026730	411	ARSB	chr5	78224071	78224072	Non-CGI	Non-CGI	FALSE	TRUE	FALSE	-0.019495	2.48543	0.495521	0.811048
cg01027532	3200	HOXA3	chr7	27155974	27155975	CGI-S-Shore	CGI-Shore	FALSE	TRUE	FALSE	0.670065	2.15678	0.605398	0.806165
cg01028849	401463	LOC401463	chr8	65490422	65490423	CGI	CGI	TRUE	TRUE	FALSE	-0.674238	0.420336	0.390194	0.566278
cg01032119	NA	NA	chr5	10857295	10857296	Non-CGI	Non-CGI	FALSE	FALSE	TRUE	-1.53808	-0.881746	0.258419	0.357696
cg01032650	80332	ADAM33	chr20	3654766	3654767	CGI	CGI	TRUE	TRUE	FALSE	2.14988	3.63701	0.797223	0.915314
cg01033871	7148	TNXB	chr6	32064837	32064838	CGI	CGI	FALSE	TRUE	FALSE	-0.621498	1.12297	0.396019	0.675447
cg01035422	5346	PLIN1	chr15	90222555	90222556	Non-CGI	Non-CGI	TRUE	FALSE	FALSE	1.36188	2.37662	0.711772	0.835462
cg01035931	NA	NA	chr19	47367462	47367463	CGI-S-Shelf	CGI-Shelf	FALSE	FALSE	TRUE	-1.88605	-0.288552	0.216743	0.458735
cg01037895	249	ALPL	chr1	21877781	21877782	Non-CGI	Non-CGI	TRUE	TRUE	FALSE	1.75979	2.43602	0.763322	0.831611
cg01040624	84561	SLC12A8	chr3	124828123	124828124	Non-CGI	Non-CGI	FALSE	TRUE	FALSE	2.67217	3.44139	0.856037	0.908927
cg01043669	NA	NA	chr3	72786069	72786070	CGI-N-Shore	CGI-Shore	FALSE	FALSE	TRUE	0.0413506	1.21373	0.506285	0.68677
cg01047635	10944	C11orf58	chr11	16761506	16761507	CGI-S-Shore	CGI-Shore	TRUE	TRUE	FALSE	1.10257	1.91874	0.678432	0.785319
cg01047635	55553	SOX6	chr11	16761506	16761507	CGI-S-Shore	CGI-Shore	TRUE	TRUE	FALSE	1.10257	1.91874	0.678432	0.785319
cg01048107	9242	MSC	chr8	72757924	72757925	CGI-S-Shore	CGI-Shore	TRUE	TRUE	FALSE	2.46567	3.2245	0.838292	0.891334
cg01048107	100132891	LOC100132891	chr8	72757924	72757925	CGI-S-Shore	CGI-Shore	TRUE	TRUE	FALSE	2.46567	3.2245	0.838292	0.891334
cg01049678	155038	GIMAP8	chr7	150147536	150147537	CGI-S-Shore	CGI-Shore	TRUE	FALSE	FALSE	0.2871	1.53668	0.549061	0.73299
cg01051003	NA	NA	chr2	23193506	23193507	Non-CGI	Non-CGI	FALSE	FALSE	TRUE	1.00752	1.81023	0.662955	0.77016
cg01051583	5641	LGMN	chr14	93196072	93196073	Non-CGI	Non-CGI	FALSE	TRUE	FALSE	-0.792389	2.07288	0.36906	0.770314
cg01052276	10865	ARID5A	chr2	97200489	97200490	CGI-N-Shore	CGI-Shore	TRUE	FALSE	FALSE	1.26969	2.29137	0.704081	0.824412
cg01056242	283383	GPR133	chr12	131622739	131622740	CGI	CGI	FALSE	TRUE	FALSE	0.661444	1.61457	0.606514	0.732779
cg01056568	9340	GLP2R	chr17	9729258	9729259	Non-CGI	Non-CGI	TRUE	FALSE	FALSE	-0.296172	0.869808	0.451524	0.636634
cg01059818	51701	NLK	chr17	26370690	26370691	CGI-S-Shore	CGI-Shore	FALSE	TRUE	FALSE	3.03244	3.6473	0.883253	0.924919
cg01062504	118461	C10orf71	chr10	50507298	50507299	CGI	CGI	FALSE	TRUE	FALSE	-0.181001	0.59623	0.468954	0.601203
cg01063579	NA	NA	chr16	86715152	86715153	CGI	CGI	FALSE	FALSE	TRUE	-2.15592	-0.354665	0.18518	0.445319
cg01067216	NA	NA	chr14	102051021	102051022	CGI	CGI	FALSE	FALSE	TRUE	-0.79739	-0.0253517	0.368654	0.495965
cg01070095	9739	SETD1A	chr16	30968205	30968206	CGI-N-Shore	CGI-Shore	TRUE	FALSE	FALSE	0.0133636	0.713842	0.502815	0.614942
cg01070903	NA	NA	chr17	77801039	77801040	CGI-N-Shore	CGI-Shore	FALSE	FALSE	TRUE	0.179773	0.885459	0.531393	0.647604
cg01072952	10085	EDIL3	chr5	83679364	83679365	CGI	CGI	FALSE	TRUE	FALSE	-2.66979	-1.92779	0.145103	0.220949
cg01076387	NA	NA	chr3	157808628	157808629	CGI-N-Shelf	CGI-Shelf	FALSE	FALSE	TRUE	0.187939	3.24035	0.531467	0.902962
cg01076704	140688	C20orf112	chr20	31127744	31127745	CGI-S-Shelf	CGI-Shelf	FALSE	FALSE	TRUE	1.41713	2.63989	0.722732	0.851727
cg01078582	1826	DSCAM	chr21	42212601	42212602	CGI-N-Shore	CGI-Shore	FALSE	TRUE	FALSE	-0.849212	-0.0708688	0.361459	0.487987
cg01080560	NA	NA	chr19	2743448	2743449	CGI-S-Shelf	CGI-Shelf	FALSE	FALSE	TRUE	1.30294	2.06698	0.703786	0.801923
cg01080927	154214	RNF217	chr6	125341187	125341188	Non-CGI	Non-CGI	FALSE	TRUE	FALSE	3.31339	4.37833	0.901347	0.953386
cg01081737	57210	SLC45A4	chr8	142238752	142238753	CGI-S-Shore	CGI-Shore	TRUE	TRUE	FALSE	-0.297844	1.0327	0.449439	0.667854
cg01083093	128346	C1orf162	chr1	112019557	112019558	Non-CGI	Non-CGI	FALSE	TRUE	FALSE	1.66214	2.69929	0.749627	0.850614
cg01085399	23022	PALLD	chr4	169535985	169535986	Non-CGI	Non-CGI	FALSE	TRUE	FALSE	-1.1272	2.20679	0.316114	0.788219
cg01085569	NA	NA	chr2	66982917	66982918	Non-CGI	Non-CGI	FALSE	FALSE	TRUE	-1.04189	1.38656	0.331251	0.703588
cg01089001	374378	GALNT18	chr11	11610742	11610743	Non-CGI	Non-CGI	FALSE	TRUE	FALSE	1.21434	2.18021	0.694934	0.80138
cg01089914	7145	TNS1	chr2	218843229	218843230	CGI-N-Shore	CGI-Shore	FALSE	TRUE	FALSE	-1.29826	1.40678	0.290273	0.692063
cg01093311	29966	STRN3	chr14	31491009	31491010	CGI-N-Shelf	CGI-Shelf	FALSE	TRUE	FALSE	1.21161	2.74692	0.691801	0.846534
cg01094192	1302	COL11A2	chr6	33158597	33158598	CGI-N-Shore	CGI-Shore	FALSE	TRUE	FALSE	-0.622363	0.135049	0.398898	0.522959
cg01094687	64221	ROBO3	chr11	124738157	124738158	CGI-S-Shore	CGI-Shore	FALSE	TRUE	FALSE	0.395034	1.10638	0.564434	0.674795
cg01095004	NA	NA	chr16	88454883	88454884	CGI-S-Shore	CGI-Shore	FALSE	FALSE	TRUE	-2.20473	1.79463	0.182554	0.720177
cg01096381	2246	FGF1	chr5	142050410	142050411	Non-CGI	Non-CGI	FALSE	TRUE	FALSE	0.00281084	2.66857	0.500925	0.854066
cg01096587	57480	PLEKHG1	chr6	151108748	151108749	Non-CGI	Non-CGI	FALSE	TRUE	FALSE	2.13364	2.84022	0.806117	0.865637
cg01097384	NA	NA	chr11	1358675	1358676	CGI	CGI	FALSE	FALSE	TRUE	-1.68486	-1.01465	0.238854	0.338256
cg01099150	NA	NA	chr2	8746519	8746520	Non-CGI	Non-CGI	FALSE	FALSE	TRUE	1.59407	2.94221	0.745836	0.872519
cg01099300	NA	NA	chr10	101779926	101779927	Non-CGI	Non-CGI	FALSE	FALSE	TRUE	0.409379	1.82702	0.567568	0.76332
cg01100175	3800	KIF5C	chr2	149645880	149645881	CGI	CGI	FALSE	TRUE	FALSE	-1.71381	-1.07677	0.238973	0.329505
cg01100322	100132594	PGAM1P5	chr12	96042879	96042880	Non-CGI	Non-CGI	FALSE	FALSE	TRUE	0.773234	3.16946	0.623559	0.894092
cg01101058	100289511	LOC100289511	chr14	70235157	70235158	CGI-S-Shore	CGI-Shore	TRUE	TRUE	FALSE	0.638085	1.60565	0.608425	0.740405
cg01101058	6430	SRSF5	chr14	70235157	70235158	CGI-S-Shore	CGI-Shore	TRUE	TRUE	FALSE	0.638085	1.60565	0.608425	0.740405
cg01103253	NA	NA	chr11	74446817	74446818	CGI-S-Shelf	CGI-Shelf	FALSE	FALSE	TRUE	0.853835	2.80779	0.627521	0.858708
cg01104208	91828	EXOC3L4	chr14	103566172	103566173	CGI-N-Shelf	CGI-Shelf	TRUE	FALSE	FALSE	-1.61935	-0.521505	0.248964	0.417252
cg01104717	776	CACNA1D	chr3	53545550	53545551	CGI	CGI	FALSE	TRUE	FALSE	0.952961	1.82776	0.657328	0.768703
cg01105494	200162	SPAG17	chr1	118727908	118727909	CGI	CGI	TRUE	FALSE	FALSE	-2.21584	-1.49174	0.17873	0.26802
cg01107476	1958	EGR1	chr5	137804819	137804820	CGI-S-Shore	CGI-Shore	FALSE	TRUE	FALSE	-0.182204	2.34799	0.468762	0.822919
cg01108112	NA	NA	chr9	139254189	139254190	CGI-S-Shore	CGI-Shore	FALSE	FALSE	TRUE	-1.38685	0.307373	0.281926	0.552665
cg01109219	25780	RASGRP3	chr2	33660754	33660755	Non-CGI	Non-CGI	TRUE	FALSE	FALSE	2.34308	3.36415	0.825746	0.909633
cg01109464	NA	NA	chr15	60292819	60292820	CGI	CGI	FALSE	FALSE	TRUE	-2.60113	-1.6776	0.142536	0.247839
cg01109763	6002	RGS12	chr4	3387281	3387282	CGI-N-Shore	CGI-Shore	TRUE	TRUE	FALSE	1.16363	2.64101	0.687333	0.849642
cg01111006	NA	NA	chr6	11161658	11161659	Non-CGI	Non-CGI	FALSE	FALSE	TRUE	0.89708	1.80224	0.638732	0.757495
cg01112784	9886	RHOBTB1	chr10	62671136	62671137	CGI	CGI	FALSE	TRUE	FALSE	1.17581	3.06661	0.679601	0.862269
cg01114989	57610	RANBP10	chr16	67757411	67757412	CGI-S-Shelf	CGI-Shelf	FALSE	TRUE	FALSE	2.582	3.32083	0.85027	0.90746
cg01115565	10076	PTPRU	chr1	29584222	29584223	CGI-N-Shore	CGI-Shore	FALSE	TRUE	FALSE	1.81657	2.56549	0.773829	0.8416
cg01116873	NA	NA	chr7	121339354	121339355	Non-CGI	Non-CGI	FALSE	FALSE	TRUE	0.862826	1.62271	0.641655	0.744102
cg01119135	79098	C1orf116	chr1	207205525	207205526	Non-CGI	Non-CGI	FALSE	TRUE	FALSE	0.557226	2.11621	0.590211	0.784677
cg01119319	445347	TARP	chr7	38356808	38356809	Non-CGI	Non-CGI	TRUE	TRUE	FALSE	-0.0808156	2.05141	0.486335	0.784092
cg01119512	57822	GRHL3	chr1	24646205	24646206	CGI-N-Shelf	CGI-Shelf	TRUE	TRUE	FALSE	-1.32712	-0.436072	0.287423	0.429124
cg01122461	57501	KIAA1257	chr3	128690038	128690039	Non-CGI	Non-CGI	FALSE	TRUE	FALSE	2.35115	3.14968	0.82698	0.894436
cg01126576	NA	NA	chr10	120949145	120949146	Non-CGI	Non-CGI	FALSE	FALSE	TRUE	2.95779	3.91746	0.879553	0.937507
cg01127312	8527	DGKD	chr2	234261725	234261726	CGI-S-Shore	CGI-Shore	TRUE	FALSE	FALSE	2.91178	4.09039	0.875277	0.941688
cg01128025	NA	NA	chr4	75588405	75588406	Non-CGI	Non-CGI	FALSE	FALSE	TRUE	-0.197276	1.12854	0.466236	0.678505
cg01129262	50863	NTM	chr11	131239289	131239290	CGI-N-Shelf	CGI-Shelf	TRUE	FALSE	FALSE	1.26264	2.37058	0.697772	0.832892
cg01129847	374872	C19orf35	chr19	2281919	2281920	CGI-N-Shore	CGI-Shore	FALSE	TRUE	FALSE	0.953983	1.89343	0.658049	0.780357
cg01129847	56928	SPPL2B	chr19	2281919	2281920	CGI-N-Shore	CGI-Shore	FALSE	TRUE	FALSE	0.953983	1.89343	0.658049	0.780357
cg01133215	860	RUNX2	chr6	45399681	45399682	Non-CGI	Non-CGI	FALSE	TRUE	FALSE	0.828462	3.26854	0.632313	0.888739
cg01137401	84107	ZIC4	chr3	147107349	147107350	CGI-S-Shore	CGI-Shore	FALSE	TRUE	FALSE	2.08068	2.72906	0.799765	0.863841
cg01138839	333926	PPM1J	chr1	113256886	113256887	CGI-N-Shore	CGI-Shore	TRUE	TRUE	FALSE	-0.959466	-0.177858	0.341623	0.468245
cg01140416	NA	NA	chr7	1293629	1293630	CGI	CGI	FALSE	FALSE	TRUE	0.508815	1.32887	0.582023	0.711777
cg01141438	55214	LEPREL1	chr3	189836207	189836208	CGI-N-Shore	CGI-Shore	FALSE	TRUE	FALSE	1.28995	2.14815	0.69499	0.806756
cg01142564	NA	NA	chr10	134765033	134765034	Non-CGI	Non-CGI	FALSE	FALSE	TRUE	3.06976	3.98589	0.890008	0.939833
cg01143607	728448	PPIEL	chr1	40026447	40026448	CGI-S-Shore	CGI-Shore	TRUE	FALSE	FALSE	2.20633	2.86062	0.815362	0.872044
cg01143938	NA	NA	chr22	48606263	48606264	CGI-S-Shore	CGI-Shore	FALSE	FALSE	TRUE	-1.40656	0.0659979	0.281163	0.510889
cg01144218	22821	RASA3	chr13	114869835	114869836	CGI	CGI	FALSE	TRUE	FALSE	2.32734	3.10787	0.825307	0.877362
cg01144768	NA	NA	chr2	315136	315137	CGI	CGI	FALSE	FALSE	TRUE	1.97521	3.97167	0.788039	0.928539
cg01146614	7430	EZR	chr6	159235211	159235212	CGI-N-Shelf	CGI-Shelf	FALSE	TRUE	FALSE	-1.81252	0.02061	0.224223	0.503655
cg01148731	4488	MSX2	chr5	174156296	174156297	CGI-S-Shelf	CGI-Shelf	FALSE	TRUE	FALSE	1.72366	2.6612	0.763653	0.846463
cg01149192	4245	MGAT1	chr5	180231058	180231059	CGI	CGI	TRUE	TRUE	FALSE	0.995748	1.87129	0.661951	0.770957
cg01149239	4241	MFI2	chr3	196746085	196746086	Non-CGI	Non-CGI	FALSE	TRUE	FALSE	0.0539907	1.58155	0.509252	0.730845
cg01149415	958	CD40	chr20	44745522	44745523	CGI-N-Shore	CGI-Shore	TRUE	FALSE	FALSE	0.244554	2.57312	0.536795	0.831892
cg01150014	NA	NA	chr8	1383797	1383798	CGI-S-Shore	CGI-Shore	FALSE	FALSE	TRUE	1.77815	2.52267	0.765521	0.846512
cg01152015	22997	IGSF9B	chr11	133820837	133820838	CGI-N-Shore	CGI-Shore	FALSE	TRUE	FALSE	-1.59001	-0.451776	0.251772	0.426877
cg01152072	NA	NA	chr4	27097275	27097276	Non-CGI	Non-CGI	FALSE	FALSE	TRUE	1.18564	1.91169	0.691107	0.784694
cg01153613	NA	NA	chr6	139928856	139928857	Non-CGI	Non-CGI	FALSE	FALSE	TRUE	1.69566	2.55004	0.755476	0.841222
cg01154445	8828	NRP2	chr2	206548171	206548172	CGI-S-Shore	CGI-Shore	FALSE	TRUE	FALSE	-2.48609	-1.2367	0.15241	0.322312
cg01156070	NA	NA	chr6	100064885	100064886	CGI-S-Shore	CGI-Shore	FALSE	FALSE	TRUE	-1.64007	-0.896558	0.251004	0.357318
cg01156892	NA	NA	chr14	36910311	36910312	Non-CGI	Non-CGI	FALSE	FALSE	TRUE	-1.27999	-0.299739	0.296394	0.449506
cg01157261	64598	MOSPD3	chr7	100210630	100210631	CGI	CGI	FALSE	TRUE	FALSE	-1.85095	-0.897862	0.218401	0.355761
cg01158469	11060	WWP2	chr16	69832831	69832832	CGI-S-Shelf	CGI-Shelf	FALSE	TRUE	FALSE	-0.243144	1.01801	0.460499	0.661224
cg01159194	NA	NA	chr16	1037073	1037074	CGI	CGI	FALSE	FALSE	TRUE	1.58624	2.69557	0.732759	0.849888
cg01160347	387332	TBPL2	chr14	55908301	55908302	CGI-S-Shore	CGI-Shore	TRUE	FALSE	FALSE	2.2473	3.23876	0.822154	0.899303
cg01161055	636	BICD1	chr12	32437813	32437814	Non-CGI	Non-CGI	FALSE	TRUE	FALSE	0.0676459	2.05193	0.51098	0.77145
cg01163842	145258	GSC	chr14	95235125	95235126	CGI	CGI	FALSE	TRUE	FALSE	-2.3961	-1.20598	0.16591	0.324043
cg01164574	4685	NCAM2	chr21	22368940	22368941	CGI-N-Shore	CGI-Shore	TRUE	FALSE	FALSE	-1.4783	1.2571	0.264962	0.681638
cg01165683	7068	THRB	chr3	24430957	24430958	Non-CGI	Non-CGI	FALSE	TRUE	FALSE	1.99625	2.87188	0.78807	0.867251
cg01166399	79632	FAM184A	chr6	119346816	119346817	Non-CGI	Non-CGI	FALSE	TRUE	FALSE	-0.727177	1.55054	0.37854	0.731865
cg01166827	692205	SNORD89	chr2	101889574	101889575	Non-CGI	Non-CGI	TRUE	TRUE	FALSE	1.85063	2.72529	0.775369	0.853635
cg01166827	284996	RNF149	chr2	101889574	101889575	Non-CGI	Non-CGI	TRUE	TRUE	FALSE	1.85063	2.72529	0.775369	0.853635
cg01168776	9926	LPGAT1	chr1	212002499	212002500	CGI-N-Shore	CGI-Shore	FALSE	TRUE	FALSE	2.459	3.32822	0.839015	0.902439
cg01168962	863	CBFA2T3	chr16	88950197	88950198	CGI	CGI	FALSE	TRUE	FALSE	2.43093	3.26524	0.831325	0.899835
cg01172682	9223	MAGI1	chr3	65342216	65342217	CGI	CGI	FALSE	TRUE	FALSE	0.314696	0.963132	0.553098	0.6553
cg01175876	10460	TACC3	chr4	1738760	1738761	CGI-N-Shelf	CGI-Shelf	FALSE	TRUE	FALSE	2.55015	3.42509	0.840896	0.907647
cg01178603	8379	MAD1L1	chr7	1976964	1976965	CGI-N-Shore	CGI-Shore	FALSE	TRUE	FALSE	0.844938	2.74128	0.634245	0.853768
cg01178680	57611	ISLR2	chr15	74425552	74425553	CGI	CGI	TRUE	TRUE	FALSE	-1.03239	1.87534	0.334873	0.729173
cg01178924	4008	LMO7	chr13	76430722	76430723	Non-CGI	Non-CGI	TRUE	TRUE	FALSE	0.669846	1.55599	0.608675	0.732721
cg01179320	4308	TRPM1	chr15	31428597	31428598	Non-CGI	Non-CGI	FALSE	TRUE	FALSE	0.371762	1.73571	0.563697	0.761636
cg01181940	6550	SLC9A3	chr5	478916	478917	CGI-N-Shore	CGI-Shore	TRUE	TRUE	FALSE	-1.00297	0.26789	0.336384	0.543591
cg01182076	55714	TENM3	chr4	183601697	183601698	CGI	CGI	TRUE	TRUE	FALSE	2.04448	3.03191	0.793625	0.883778
cg01184282	130075	OR9A4	chr7	141617618	141617619	Non-CGI	Non-CGI	TRUE	FALSE	FALSE	0.030391	0.692888	0.505311	0.616682
cg01185093	222962	SLC29A4	chr7	5343176	5343177	CGI-S-Shore	CGI-Shore	FALSE	TRUE	FALSE	0.108789	1.16526	0.517234	0.684752
cg01185502	1002	CDH4	chr20	60456503	60456504	CGI	CGI	FALSE	TRUE	FALSE	-1.8253	-0.642447	0.22283	0.401175
cg01185626	431707	LHX8	chr1	75594016	75594017	CGI	CGI	TRUE	FALSE	FALSE	-2.14215	-1.4407	0.187176	0.283223
cg01188191	7148	TNXB	chr6	32047349	32047350	CGI-S-Shore	CGI-Shore	FALSE	TRUE	FALSE	0.64348	1.35462	0.603187	0.710354
cg01190484	135644	TRIM40	chr6	30104593	30104594	Non-CGI	Non-CGI	TRUE	TRUE	FALSE	-1.62887	-0.308599	0.248344	0.45143
cg01192538	3356	HTR2A	chr13	47472050	47472051	CGI-S-Shelf	CGI-Shelf	TRUE	FALSE	FALSE	3.25878	3.96521	0.8994	0.936984
cg01195276	NA	NA	chr11	121567477	121567478	Non-CGI	Non-CGI	FALSE	FALSE	TRUE	-1.54398	-0.353422	0.2597	0.445181
cg01195676	NA	NA	chr14	88630058	88630059	Non-CGI	Non-CGI	TRUE	FALSE	FALSE	2.15185	3.07591	0.808838	0.889742
cg01195861	51367	POP5	chr12	121019729	121019730	CGI-S-Shore	CGI-Shore	TRUE	FALSE	FALSE	-0.763013	0.119849	0.377247	0.522417
cg01197302	55698	RADIL	chr7	4859667	4859668	CGI-S-Shore	CGI-Shore	FALSE	TRUE	FALSE	-0.964173	0.432712	0.341368	0.568148
cg01198661	7164	TPD52L1	chr6	125504065	125504066	Non-CGI	Non-CGI	FALSE	TRUE	FALSE	1.71963	2.79656	0.757268	0.869102
cg01198994	54587	MXRA8	chr1	1294629	1294630	CGI-S-Shore	CGI-Shore	TRUE	TRUE	FALSE	-2.37315	-1.2754	0.163371	0.303007
cg01199603	253827	MSRB3	chr12	65718113	65718114	Non-CGI	Non-CGI	FALSE	TRUE	FALSE	0.709954	1.32201	0.618951	0.706854
cg01199807	440738	MAP1LC3C	chr1	242163517	242163518	Non-CGI	Non-CGI	TRUE	FALSE	FALSE	1.59717	3.32462	0.74299	0.90376
cg01199888	27178	IL37	chr2	113672713	113672714	Non-CGI	Non-CGI	TRUE	TRUE	FALSE	1.04204	1.67102	0.669166	0.750307
cg01200021	NA	NA	chr6	40359007	40359008	CGI-N-Shore	CGI-Shore	FALSE	FALSE	TRUE	-0.736299	0.087028	0.380371	0.514294
cg01200177	5433	POLR2D	chr2	128616082	128616083	CGI-S-Shore	CGI-Shore	TRUE	FALSE	FALSE	-1.53966	-0.696472	0.263086	0.390963
cg01201512	4815	NINJ2	chr12	740338	740339	CGI-S-Shore	CGI-Shore	FALSE	TRUE	FALSE	2.46303	3.96984	0.829985	0.930299
cg01202155	2018	EMX2	chr10	119302540	119302541	CGI	CGI	TRUE	TRUE	FALSE	-3.1086	-1.22918	0.106888	0.333188
cg01202155	196047	EMX2OS	chr10	119302540	119302541	CGI	CGI	TRUE	TRUE	FALSE	-3.1086	-1.22918	0.106888	0.333188
cg01202265	57484	RNF150	chr4	142053146	142053147	CGI-N-Shore	CGI-Shore	FALSE	TRUE	FALSE	-2.58572	-1.55511	0.145285	0.274945
cg01202700	121256	TMEM132D	chr12	130337671	130337672	CGI-N-Shelf	CGI-Shelf	FALSE	TRUE	FALSE	0.394445	1.27247	0.566162	0.702719
cg01204772	NA	NA	chr2	240738232	240738233	CGI	CGI	FALSE	FALSE	TRUE	-0.588747	0.905998	0.401541	0.647894
cg01204844	NA	NA	chr22	40437423	40437424	CGI-N-Shelf	CGI-Shelf	FALSE	FALSE	TRUE	-0.914995	0.821746	0.35174	0.63278
cg01205058	1235	CCR6	chr6	167508191	167508192	CGI	CGI	FALSE	TRUE	FALSE	-1.58465	-0.418375	0.252708	0.434829
cg01207684	115	ADCY9	chr16	4103167	4103168	CGI	CGI	FALSE	TRUE	FALSE	-0.573754	2.62822	0.408117	0.819697
cg01210642	221476	PI16	chr6	36921499	36921500	Non-CGI	Non-CGI	TRUE	TRUE	FALSE	1.94007	2.56341	0.786603	0.844244
cg01210663	2203	FBP1	chr9	97400833	97400834	CGI-N-Shore	CGI-Shore	FALSE	TRUE	FALSE	-0.340663	0.612969	0.444918	0.601989
cg01211283	157310	PEBP4	chr8	22735276	22735277	Non-CGI	Non-CGI	TRUE	TRUE	FALSE	-1.71577	-0.446328	0.237838	0.428131
cg01211852	NA	NA	chr8	144471653	144471654	CGI-S-Shelf	CGI-Shelf	FALSE	FALSE	TRUE	0.140332	1.20395	0.528327	0.690156
cg01212562	80781	COL18A1	chr21	46868092	46868093	CGI-N-Shore	CGI-Shore	FALSE	TRUE	FALSE	2.14293	2.91652	0.808621	0.875972
cg01215442	2657	GDF1	chr19	18980443	18980444	CGI-S-Shore	CGI-Shore	FALSE	TRUE	FALSE	-0.288399	0.333614	0.450554	0.553446
cg01216497	NA	NA	chr13	112074910	112074911	CGI-N-Shore	CGI-Shore	FALSE	FALSE	TRUE	0.847238	1.99274	0.639851	0.793309
cg01219130	23035	PHLPP2	chr16	71680526	71680527	Non-CGI	Non-CGI	TRUE	TRUE	FALSE	2.67262	3.75452	0.857568	0.926595
cg01225788	23213	SULF1	chr8	70404514	70404515	CGI-N-Shore	CGI-Shore	TRUE	TRUE	FALSE	-0.0238548	0.884824	0.496371	0.638923
cg01229567	142678	MIB2	chr1	1549818	1549819	CGI	CGI	TRUE	FALSE	FALSE	-1.40027	-0.642583	0.278825	0.393827
cg01229787	NA	NA	chr15	100048371	100048372	Non-CGI	Non-CGI	FALSE	FALSE	TRUE	-2.44086	-1.08434	0.164228	0.340529
cg01231009	NA	NA	chr8	130641185	130641186	Non-CGI	Non-CGI	FALSE	FALSE	TRUE	0.957476	2.504	0.656883	0.831979
cg01231543	NA	NA	chr16	68741748	68741749	Non-CGI	Non-CGI	FALSE	FALSE	TRUE	-1.58007	-0.219843	0.255553	0.469049
cg01232121	286177	LOC286177	chr8	58177661	58177662	CGI-S-Shelf	CGI-Shelf	FALSE	TRUE	FALSE	-0.99648	-0.167299	0.340677	0.472663
cg01232969	NA	NA	chr18	64933074	64933075	Non-CGI	Non-CGI	FALSE	FALSE	TRUE	-1.84703	-0.981459	0.221598	0.34644
cg01233025	NA	NA	chr11	55637839	55637840	CGI-N-Shelf	CGI-Shelf	FALSE	FALSE	TRUE	-0.662071	-0.0386523	0.38896	0.493404
cg01234678	414260	LINC00619	chr10	44341979	44341980	Non-CGI	Non-CGI	FALSE	TRUE	FALSE	-0.624705	1.01211	0.396097	0.650559
cg01235172	5799	PTPRN2	chr7	157451618	157451619	CGI	CGI	FALSE	TRUE	FALSE	-0.592505	0.54083	0.401124	0.590359
cg01237853	NA	NA	chr13	41256577	41256578	Non-CGI	Non-CGI	FALSE	FALSE	TRUE	2.78035	3.80312	0.864887	0.92658
cg01239704	5799	PTPRN2	chr7	157605569	157605570	CGI	CGI	FALSE	TRUE	FALSE	-0.601987	1.70715	0.402443	0.754462
cg01243371	2294	FOXF1	chr16	86547386	86547387	CGI	CGI	FALSE	TRUE	FALSE	0.0804583	2.16718	0.513509	0.808623
cg01245268	23108	RAP1GAP2	chr17	2771650	2771651	Non-CGI	Non-CGI	FALSE	TRUE	FALSE	1.06665	2.12157	0.669826	0.799817
cg01246622	NA	NA	chr10	115141827	115141828	Non-CGI	Non-CGI	FALSE	FALSE	TRUE	-1.74911	0.0726294	0.231711	0.505241
cg01247693	4862	NPAS2	chr2	101468450	101468451	Non-CGI	Non-CGI	FALSE	TRUE	FALSE	2.84163	3.52665	0.871603	0.912767
cg01247788	64077	LHPP	chr10	126281564	126281565	CGI-S-Shelf	CGI-Shelf	FALSE	TRUE	FALSE	0.822868	2.28	0.630626	0.803578
cg01247836	80725	SRCIN1	chr17	36722136	36722137	CGI-S-Shelf	CGI-Shelf	TRUE	TRUE	FALSE	0.238168	1.30552	0.539021	0.705843
cg01254264	NA	NA	chr6	33205676	33205677	Non-CGI	Non-CGI	FALSE	FALSE	TRUE	-2.30966	-1.15936	0.169641	0.321214
cg01254505	684	BST2	chr19	17516470	17516471	CGI-S-Shore	CGI-Shore	TRUE	FALSE	FALSE	-0.399227	0.296747	0.432812	0.548449
cg01256563	NA	NA	chr12	34318527	34318528	CGI-N-Shore	CGI-Shore	FALSE	FALSE	TRUE	0.992009	1.73335	0.66016	0.763688
cg01257697	NA	NA	chr17	6470974	6470975	Non-CGI	Non-CGI	FALSE	FALSE	TRUE	-2.03607	-0.964072	0.1993	0.3485
cg01257799	643	CXCR5	chr11	118753476	118753477	Non-CGI	Non-CGI	TRUE	FALSE	FALSE	-0.338586	0.652279	0.442191	0.605491
cg01259156	431707	LHX8	chr1	75594592	75594593	CGI-S-Shore	CGI-Shore	TRUE	TRUE	FALSE	-1.1321	-0.199941	0.319051	0.469588
cg01259891	79888	LPCAT1	chr5	1464241	1464242	CGI	CGI	FALSE	TRUE	FALSE	2.21445	2.9205	0.814755	0.874966
cg01260219	11095	ADAMTS8	chr11	130299333	130299334	CGI-S-Shore	CGI-Shore	TRUE	FALSE	FALSE	1.56915	2.24293	0.740987	0.815116
cg01261013	23515	MORC3	chr21	37691747	37691748	CGI-N-Shore	CGI-Shore	TRUE	FALSE	FALSE	-0.226652	0.817693	0.462541	0.628896
cg01262865	9564	BCAR1	chr16	75282094	75282095	CGI-N-Shelf	CGI-Shelf	TRUE	TRUE	FALSE	-0.984002	-0.165984	0.337553	0.470606
cg01262913	257203	DSCR9	chr21	38580486	38580487	Non-CGI	Non-CGI	TRUE	FALSE	FALSE	-2.06772	0.561428	0.198416	0.584665
cg01264705	NA	NA	chr12	116848341	116848342	Non-CGI	Non-CGI	FALSE	FALSE	TRUE	-0.246511	2.23529	0.45814	0.81499
cg01267532	NA	NA	chr18	76266372	76266373	CGI	CGI	FALSE	FALSE	TRUE	-2.07306	-0.920411	0.194983	0.359992
cg01268541	287	ANK2	chr4	113970660	113970661	Non-CGI	Non-CGI	TRUE	TRUE	FALSE	-1.0208	-0.263397	0.334303	0.458752
cg01269299	NA	NA	chr10	112287792	112287793	CGI-N-Shelf	CGI-Shelf	FALSE	FALSE	TRUE	-1.83313	1.73684	0.221583	0.745576
cg01269537	6483	ST3GAL2	chr16	70415514	70415515	CGI	CGI	FALSE	TRUE	FALSE	-3.44651	-2.27927	0.0848027	0.214498
cg01270241	NA	NA	chr14	97673030	97673031	CGI-N-Shore	CGI-Shore	FALSE	FALSE	TRUE	-0.321857	0.403458	0.449147	0.568073
cg01271485	NA	NA	chr2	55650017	55650018	CGI-S-Shelf	CGI-Shelf	FALSE	FALSE	TRUE	1.44052	2.27204	0.725839	0.816806
cg01273336	NA	NA	chr13	67872416	67872417	Non-CGI	Non-CGI	FALSE	FALSE	TRUE	1.61024	2.23836	0.747272	0.812137
cg01274826	163051	ZNF709	chr19	12596128	12596129	CGI-S-Shore	CGI-Shore	TRUE	TRUE	FALSE	-0.499905	0.668414	0.417124	0.597376
cg01275685	168667	BMPER	chr7	34179230	34179231	Non-CGI	Non-CGI	FALSE	TRUE	FALSE	1.35994	1.98843	0.71116	0.791271
cg01275932	9919	SEC16A	chr9	139367244	139367245	CGI	CGI	FALSE	TRUE	FALSE	2.95109	3.74658	0.879104	0.926514
cg01281501	283383	GPR133	chr12	131494451	131494452	CGI-S-Shore	CGI-Shore	FALSE	TRUE	FALSE	2.05594	2.67154	0.802608	0.860294
cg01282174	NA	NA	chr11	119630144	119630145	Non-CGI	Non-CGI	FALSE	FALSE	TRUE	-2.77732	-1.17201	0.130721	0.350843
cg01283141	8448	DOC2A	chr16	30020506	30020507	CGI-N-Shore	CGI-Shore	FALSE	TRUE	FALSE	2.01128	2.6933	0.797346	0.856425
cg01283141	552900	BOLA2	chr16	30020506	30020507	CGI-N-Shore	CGI-Shore	FALSE	TRUE	FALSE	2.01128	2.6933	0.797346	0.856425
cg01286133	351	APP	chr21	27540106	27540107	CGI-N-Shore	CGI-Shore	TRUE	TRUE	FALSE	3.09749	4.23206	0.884325	0.94463
cg01286319	2788	GNG7	chr19	2695343	2695344	CGI-N-Shore	CGI-Shore	FALSE	TRUE	FALSE	0.0563417	0.739874	0.509719	0.622918
cg01287376	NA	NA	chr14	104356043	104356044	CGI-N-Shore	CGI-Shore	FALSE	FALSE	TRUE	-2.3842	-0.847933	0.164809	0.368704
cg01287505	5414	2004-09-01	chr17	56607190	56607191	CGI-N-Shore	CGI-Shore	TRUE	TRUE	FALSE	1.69668	2.6562	0.759445	0.860402
cg01287730	NA	NA	chr2	109622531	109622532	Non-CGI	Non-CGI	FALSE	FALSE	TRUE	-1.32182	-0.23597	0.292469	0.459707
cg01289206	81532	MOB2	chr11	1772721	1772722	CGI-N-Shore	CGI-Shore	TRUE	TRUE	FALSE	-1.25286	-0.0263432	0.296675	0.496893
cg01289206	402778	IFITM10	chr11	1772721	1772722	CGI-N-Shore	CGI-Shore	TRUE	TRUE	FALSE	-1.25286	-0.0263432	0.296675	0.496893
cg01289541	57709	SLC7A14	chr3	170282058	170282059	Non-CGI	Non-CGI	FALSE	TRUE	FALSE	-2.49546	-1.55947	0.153696	0.267054
cg01289541	5010	CLDN11	chr3	170282058	170282059	Non-CGI	Non-CGI	FALSE	TRUE	FALSE	-2.49546	-1.55947	0.153696	0.267054
cg01290718	7434	VIPR2	chr7	158858508	158858509	CGI	CGI	FALSE	TRUE	FALSE	0.760871	1.67751	0.625828	0.756246
cg01292539	NA	NA	chr2	241230376	241230377	CGI	CGI	FALSE	FALSE	TRUE	0.841116	1.50688	0.639435	0.732062
cg01293277	160364	CLEC12A	chr12	10123440	10123441	Non-CGI	Non-CGI	TRUE	TRUE	FALSE	2.85529	3.61529	0.873019	0.922961
cg01293723	83895	KRTAP1-5	chr17	39183037	39183038	Non-CGI	Non-CGI	TRUE	FALSE	FALSE	-0.408987	1.51629	0.433097	0.723139
cg01295034	9683	N4BP1	chr16	48576092	48576093	Non-CGI	Non-CGI	FALSE	TRUE	FALSE	-0.46977	0.330132	0.422349	0.551308
cg01295994	NA	NA	chr19	51924572	51924573	CGI-N-Shore	CGI-Shore	FALSE	FALSE	TRUE	-2.46504	-1.27431	0.154201	0.300277
cg01298374	8496	PPFIBP1	chr12	27768965	27768966	Non-CGI	Non-CGI	FALSE	TRUE	FALSE	2.08749	3.18546	0.798069	0.892358
cg01300218	191585	PLAC4	chr21	42557529	42557530	Non-CGI	Non-CGI	TRUE	TRUE	FALSE	3.18173	3.81633	0.893061	0.931888
cg01300218	25825	BACE2	chr21	42557529	42557530	Non-CGI	Non-CGI	TRUE	TRUE	FALSE	3.18173	3.81633	0.893061	0.931888
cg01300434	NA	NA	chr10	133651747	133651748	CGI	CGI	FALSE	FALSE	TRUE	-3.1741	-2.43194	0.102614	0.160839
cg01301276	26993	AKAP8L	chr19	15511562	15511563	CGI-S-Shore	CGI-Shore	FALSE	TRUE	FALSE	2.1653	3.37699	0.813829	0.908755
cg01301319	3200	HOXA3	chr7	27153580	27153581	CGI	CGI	FALSE	TRUE	FALSE	-0.628099	1.07648	0.406599	0.669319
cg01302436	50614	GALNT9	chr12	132865713	132865714	CGI-S-Shore	CGI-Shore	FALSE	TRUE	FALSE	-1.19673	-0.0768	0.310588	0.487123
cg01303385	90102	PHLDB2	chr3	111451470	111451471	Non-CGI	Non-CGI	TRUE	TRUE	FALSE	2.77018	3.45079	0.865155	0.909094
cg01303385	257068	PLCXD2	chr3	111451470	111451471	Non-CGI	Non-CGI	TRUE	TRUE	FALSE	2.77018	3.45079	0.865155	0.909094
cg01304575	140730	RIMS4	chr20	43380866	43380867	CGI-S-Shore	CGI-Shore	FALSE	TRUE	FALSE	-0.341242	0.760622	0.444856	0.622792
cg01304575	60598	KCNK15	chr20	43380866	43380867	CGI-S-Shore	CGI-Shore	FALSE	TRUE	FALSE	-0.341242	0.760622	0.444856	0.622792
cg01306662	6059	ABCE1	chr4	146022320	146022321	CGI-S-Shelf	CGI-Shelf	FALSE	TRUE	FALSE	1.95655	3.66514	0.791172	0.920992
cg01306688	27198	HCAR1	chr12	123215301	123215302	CGI	CGI	TRUE	FALSE	FALSE	-2.20953	-0.975787	0.187156	0.360658
cg01306824	NA	NA	chr17	77834118	77834119	CGI-N-Shore	CGI-Shore	FALSE	FALSE	TRUE	-0.276348	1.54019	0.457219	0.721289
cg01307174	10777	ARPP21	chr3	35722556	35722557	Non-CGI	Non-CGI	TRUE	TRUE	FALSE	-0.804806	0.641129	0.368791	0.598702
cg01307483	4899	NRF1	chr7	129254604	129254605	CGI-S-Shelf	CGI-Shelf	FALSE	TRUE	FALSE	2.06602	2.8133	0.801757	0.857174
cg01309569	261734	NPHP4	chr1	5950209	5950210	CGI-N-Shore	CGI-Shore	FALSE	TRUE	FALSE	2.7916	3.84587	0.865368	0.930025
cg01310096	NA	NA	chr13	35474735	35474736	Non-CGI	Non-CGI	FALSE	FALSE	TRUE	-0.121149	1.24284	0.480851	0.691515
cg01310120	728264	MIR143HG	chr5	148810103	148810104	Non-CGI	Non-CGI	TRUE	TRUE	FALSE	-2.3847	-0.529197	0.16316	0.41319
cg01310120	406935	MIR143	chr5	148810103	148810104	Non-CGI	Non-CGI	TRUE	TRUE	FALSE	-2.3847	-0.529197	0.16316	0.41319
cg01310330	392617	ELFN1	chr7	1787194	1787195	CGI	CGI	FALSE	TRUE	FALSE	-1.00788	0.0928653	0.336639	0.51717
cg01310397	4585	MUC4	chr3	195490033	195490034	CGI	CGI	FALSE	TRUE	FALSE	1.47676	2.45063	0.722769	0.84198
cg01311170	NA	NA	chr17	39169407	39169408	Non-CGI	Non-CGI	FALSE	FALSE	TRUE	1.15471	1.84199	0.686997	0.764867
cg01311995	NA	NA	chr16	85205741	85205742	CGI-S-Shore	CGI-Shore	FALSE	FALSE	TRUE	-2.1924	-0.740457	0.181887	0.378989
cg01312732	9689	BZW1	chr2	201680625	201680626	CGI-S-Shelf	CGI-Shelf	FALSE	TRUE	FALSE	1.35867	2.05618	0.712367	0.799158
cg01313387	1840	DTX1	chr12	113515969	113515970	CGI-S-Shore	CGI-Shore	FALSE	TRUE	FALSE	0.364046	1.61871	0.56098	0.725761
cg01314574	80781	COL18A1	chr21	46858801	46858802	CGI-N-Shore	CGI-Shore	FALSE	TRUE	FALSE	-1.11288	0.102374	0.319492	0.517437
cg01315067	8505	PARG	chr10	51576232	51576233	CGI-S-Shelf	CGI-Shelf	TRUE	TRUE	FALSE	1.49361	2.34418	0.734432	0.829175
cg01315067	8031	NCOA4	chr10	51576232	51576233	CGI-S-Shelf	CGI-Shelf	TRUE	TRUE	FALSE	1.49361	2.34418	0.734432	0.829175
cg01315919	284788	LOC284788	chr20	22401404	22401405	Non-CGI	Non-CGI	TRUE	FALSE	FALSE	0.74378	2.00329	0.622452	0.787886
cg01316378	NA	NA	chr10	63629580	63629581	CGI-S-Shore	CGI-Shore	FALSE	FALSE	TRUE	-0.839834	1.03171	0.360962	0.643166
cg01320908	1302	COL11A2	chr6	33139810	33139811	Non-CGI	Non-CGI	FALSE	TRUE	FALSE	1.84215	2.74444	0.772601	0.864181
cg01321100	284297	SSC5D	chr19	56028218	56028219	CGI-N-Shore	CGI-Shore	FALSE	TRUE	FALSE	-1.60616	-0.634642	0.250926	0.396022
cg01321106	NA	NA	chr6	111552536	111552537	Non-CGI	Non-CGI	FALSE	FALSE	TRUE	2.41282	3.23164	0.826779	0.899109
cg01321962	2099	ESR1	chr6	152126441	152126442	CGI-N-Shelf	CGI-Shelf	TRUE	TRUE	FALSE	-1.72258	-0.364686	0.238145	0.452103
cg01322142	10815	CPLX1	chr4	786718	786719	CGI-S-Shore	CGI-Shore	FALSE	TRUE	FALSE	0.898814	1.96853	0.647406	0.790334
cg01322214	136895	C7orf31	chr7	25219198	25219199	CGI-N-Shore	CGI-Shore	FALSE	TRUE	FALSE	-0.307937	0.768293	0.448009	0.618463
cg01323371	51555	PEX5L	chr3	179667823	179667824	Non-CGI	Non-CGI	FALSE	TRUE	FALSE	1.28144	2.16075	0.702985	0.810513
cg01323672	8927	BSN	chr3	49700451	49700452	CGI	CGI	FALSE	TRUE	FALSE	0.96744	2.08748	0.655776	0.803441
cg01323706	84928	TMEM209	chr7	129845832	129845833	CGI-S-Shore	CGI-Shore	TRUE	FALSE	FALSE	0.321422	1.70606	0.554164	0.745813
cg01323706	136263	SSMEM1	chr7	129845832	129845833	CGI-S-Shore	CGI-Shore	TRUE	FALSE	FALSE	0.321422	1.70606	0.554164	0.745813
cg01325465	9764	KIAA0513	chr16	85123554	85123555	CGI	CGI	FALSE	TRUE	FALSE	2.46941	3.28118	0.838973	0.902009
cg01328158	NA	NA	chr2	129248896	129248897	CGI-N-Shore	CGI-Shore	FALSE	FALSE	TRUE	2.80207	3.43808	0.871798	0.910919
cg01328235	NA	NA	chr13	48412113	48412114	Non-CGI	Non-CGI	FALSE	FALSE	TRUE	2.05341	3.03422	0.798734	0.884778
cg01328444	NA	NA	chr6	155967739	155967740	Non-CGI	Non-CGI	FALSE	FALSE	TRUE	-0.502702	0.885303	0.415355	0.634397
cg01328621	NA	NA	chr15	68567276	68567277	CGI-N-Shelf	CGI-Shelf	FALSE	FALSE	TRUE	2.09146	3.09384	0.804506	0.89066
cg01328703	NA	NA	chr3	142836347	142836348	CGI-N-Shore	CGI-Shore	FALSE	FALSE	TRUE	0.0327571	1.85739	0.504679	0.76
cg01329005	684	BST2	chr19	17516712	17516713	CGI-N-Shore	CGI-Shore	TRUE	TRUE	FALSE	1.58161	2.51742	0.739724	0.835831
cg01329151	11083	DIDO1	chr20	61559756	61559757	CGI-S-Shore	CGI-Shore	TRUE	TRUE	FALSE	-0.614083	0.610951	0.399105	0.595182
cg01329687	8303	SNN	chr16	11761803	11761804	CGI	CGI	TRUE	FALSE	FALSE	-1.47632	-0.663364	0.269785	0.394286
cg01329973	NA	NA	chr16	86912065	86912066	CGI-N-Shore	CGI-Shore	FALSE	FALSE	TRUE	-1.12538	0.446966	0.315484	0.568634
cg01330312	8031	NCOA4	chr10	51567670	51567671	CGI-S-Shelf	CGI-Shelf	FALSE	TRUE	FALSE	1.45892	2.21459	0.73147	0.812547
cg01330312	8505	PARG	chr10	51567670	51567671	CGI-S-Shelf	CGI-Shelf	FALSE	TRUE	FALSE	1.45892	2.21459	0.73147	0.812547
cg01331196	3269	HRH1	chr3	11287078	11287079	Non-CGI	Non-CGI	FALSE	TRUE	FALSE	2.95483	3.56608	0.882957	0.918433
cg01333242	NA	NA	chr13	30740197	30740198	Non-CGI	Non-CGI	FALSE	FALSE	TRUE	-2.67195	-0.84852	0.137037	0.37306
cg01335127	92370	ACPL2	chr3	140958547	140958548	Non-CGI	Non-CGI	FALSE	TRUE	FALSE	-0.00805252	1.25914	0.498982	0.667966
cg01335210	NA	NA	chr10	130422176	130422177	Non-CGI	Non-CGI	FALSE	FALSE	TRUE	1.09928	2.37525	0.664554	0.809104
cg01336231	23180	RFTN1	chr3	16523047	16523048	Non-CGI	Non-CGI	FALSE	TRUE	FALSE	-1.45741	0.336546	0.271439	0.550647
cg01337047	1828	DSG1	chr18	28897113	28897114	Non-CGI	Non-CGI	TRUE	FALSE	FALSE	-1.49447	-0.322465	0.26477	0.45073
cg01337207	7148	TNXB	chr6	32063835	32063836	CGI	CGI	FALSE	TRUE	FALSE	0.00805036	2.67427	0.500496	0.828711
cg01337931	6527	SLC5A4	chr22	32651693	32651694	Non-CGI	Non-CGI	TRUE	FALSE	FALSE	-0.440115	1.066	0.426415	0.670561
cg01338255	NA	NA	chr20	30176054	30176055	CGI	CGI	FALSE	FALSE	TRUE	-0.895352	0.0505054	0.352811	0.501695
cg01338474	11100	HNRNPUL1	chr19	41782099	41782100	Non-CGI	Non-CGI	FALSE	TRUE	FALSE	2.15829	3.68162	0.810748	0.920919
cg01338705	57492	ARID1B	chr6	157368215	157368216	Non-CGI	Non-CGI	FALSE	TRUE	FALSE	3.18773	4.02198	0.895783	0.941605
cg01340312	203068	TUBB	chr6	30687511	30687512	CGI-S-Shore	CGI-Shore	TRUE	FALSE	FALSE	-3.14585	-2.24136	0.107035	0.203275
cg01342115	NA	NA	chr3	134031663	134031664	CGI	CGI	FALSE	FALSE	TRUE	0.232674	1.5504	0.538494	0.7327
cg01344452	8526	DGKE	chr17	54912143	54912144	CGI	CGI	TRUE	TRUE	FALSE	-2.75388	-1.92397	0.132603	0.232981
cg01344452	339210	C17orf67	chr17	54912143	54912144	CGI	CGI	TRUE	TRUE	FALSE	-2.75388	-1.92397	0.132603	0.232981
cg01345586	402160	LOC402160	chr4	2435944	2435945	CGI-S-Shelf	CGI-Shelf	FALSE	TRUE	FALSE	-0.167019	0.870138	0.47107	0.634535
cg01346767	91179	SCARF2	chr22	20779006	20779007	CGI	CGI	FALSE	TRUE	FALSE	-0.071603	1.37011	0.487328	0.706517
cg01347702	80736	SLC44A4	chr6	31845672	31845673	CGI-N-Shore	CGI-Shore	TRUE	TRUE	FALSE	1.21886	2.33349	0.69341	0.81826
cg01348055	2903	GRIN2A	chr16	10272788	10272789	CGI-N-Shore	CGI-Shore	FALSE	TRUE	FALSE	0.0892259	1.0324	0.515237	0.669374
cg01348086	10636	RGS14	chr5	176785296	176785297	CGI-S-Shore	CGI-Shore	FALSE	TRUE	FALSE	0.296372	1.07756	0.550359	0.672112
cg01348293	NA	NA	chr7	27260113	27260114	CGI-N-Shore	CGI-Shore	FALSE	FALSE	TRUE	0.164373	0.957166	0.528251	0.656972
cg01349772	NA	NA	chr2	64300445	64300446	Non-CGI	Non-CGI	FALSE	FALSE	TRUE	2.01535	2.89367	0.793096	0.875281
cg01351089	4615	MYD88	chr3	38183201	38183202	CGI-S-Shelf	CGI-Shelf	FALSE	TRUE	FALSE	1.70035	2.66138	0.755663	0.844883
cg01351992	8912	CACNA1H	chr16	1210389	1210390	CGI	CGI	FALSE	TRUE	FALSE	-0.279141	0.693025	0.453854	0.610218
cg01352090	115	ADCY9	chr16	4103533	4103534	CGI-S-Shore	CGI-Shore	FALSE	TRUE	FALSE	-1.99055	0.440292	0.204083	0.569324
cg01353670	NA	NA	chr3	112512556	112512557	Non-CGI	Non-CGI	FALSE	FALSE	TRUE	1.1806	2.86033	0.674841	0.861577
cg01353907	283383	GPR133	chr12	131438283	131438284	CGI-N-Shore	CGI-Shore	TRUE	FALSE	FALSE	-1.83267	-0.634549	0.223146	0.401288
cg01354588	79875	THSD4	chr15	71657141	71657142	Non-CGI	Non-CGI	FALSE	TRUE	FALSE	1.32455	2.08477	0.710226	0.801321
cg01356824	10019	SH2B3	chr12	111849884	111849885	Non-CGI	Non-CGI	FALSE	TRUE	FALSE	-0.283372	1.42202	0.453554	0.719039
cg01356867	89970	RSPRY1	chr16	57272905	57272906	Non-CGI	Non-CGI	FALSE	TRUE	FALSE	0.74803	2.64064	0.617723	0.846178
cg01357234	NA	NA	chr16	78130684	78130685	CGI-N-Shelf	CGI-Shelf	FALSE	FALSE	TRUE	1.77641	2.438	0.771647	0.842603
cg01357429	2128	EVX1	chr7	27285563	27285564	CGI	CGI	FALSE	TRUE	FALSE	-2.94512	-1.09251	0.116621	0.340696
cg01357897	9482	STX8	chr17	9246710	9246711	Non-CGI	Non-CGI	FALSE	TRUE	FALSE	2.3335	3.13391	0.828489	0.884799
cg01360605	284757	LOC284757	chr20	58983676	58983677	CGI-N-Shore	CGI-Shore	FALSE	TRUE	FALSE	-1.38343	0.00310867	0.280433	0.500874
cg01362115	5607	MAP2K5	chr15	68075218	68075219	Non-CGI	Non-CGI	FALSE	TRUE	FALSE	1.71323	2.47171	0.757984	0.839207
cg01362515	3728	JUP	chr17	39782091	39782092	Non-CGI	Non-CGI	TRUE	TRUE	FALSE	0.88891	1.82547	0.649175	0.770009
cg01362515	3872	KRT17	chr17	39782091	39782092	Non-CGI	Non-CGI	TRUE	TRUE	FALSE	0.88891	1.82547	0.649175	0.770009
cg01364478	5396	PRRX1	chr1	170640331	170640332	CGI-S-Shore	CGI-Shore	FALSE	TRUE	FALSE	-2.36916	-0.49497	0.169499	0.421862
cg01364755	105	ADARB2	chr10	1370694	1370695	CGI-S-Shore	CGI-Shore	FALSE	TRUE	FALSE	-0.428252	1.22917	0.429802	0.684232
cg01364833	3059	HCLS1	chr3	121380236	121380237	Non-CGI	Non-CGI	TRUE	FALSE	FALSE	2.18946	4.42615	0.807077	0.954382
cg01365117	389072	PLEKHM3	chr2	208761957	208761958	Non-CGI	Non-CGI	FALSE	TRUE	FALSE	1.57354	2.88808	0.741164	0.867043
cg01366985	8418	CMAHP	chr6	25167695	25167696	Non-CGI	Non-CGI	TRUE	FALSE	FALSE	2.39081	3.36562	0.834468	0.901371
cg01368900	9922	IQSEC1	chr3	13113959	13113960	CGI-N-Shore	CGI-Shore	FALSE	TRUE	FALSE	-1.24023	0.618502	0.312881	0.594189
cg01369207	NA	NA	chr2	45484726	45484727	Non-CGI	Non-CGI	FALSE	FALSE	TRUE	0.0313943	2.6686	0.505058	0.850552
cg01370449	3202	HOXA5	chr7	27183369	27183370	CGI	CGI	TRUE	TRUE	FALSE	0.596873	2.60905	0.590651	0.841599
cg01370449	100133311	HOXA-AS3	chr7	27183369	27183370	CGI	CGI	TRUE	TRUE	FALSE	0.596873	2.60905	0.590651	0.841599
cg01371072	5308	PITX2	chr4	111541965	111541966	CGI	CGI	FALSE	TRUE	FALSE	0.658655	1.42681	0.605402	0.715876
cg01377200	56977	STOX2	chr4	184938316	184938317	CGI	CGI	FALSE	TRUE	FALSE	0.52844	1.52525	0.587298	0.719657
cg01377358	171023	ASXL1	chr20	30948211	30948212	CGI-S-Shore	CGI-Shore	FALSE	TRUE	FALSE	-2.73973	-1.88822	0.131963	0.230278
cg01385157	145864	HAPLN3	chr15	89421347	89421348	CGI	CGI	FALSE	TRUE	FALSE	-0.465189	2.3501	0.424007	0.787263
cg01385327	2263	FGFR2	chr10	123356336	123356337	CGI-S-Shore	CGI-Shore	TRUE	TRUE	FALSE	-1.45704	0.498812	0.278656	0.570946
cg01386185	117248	GALNT15	chr3	15935423	15935424	Non-CGI	Non-CGI	TRUE	FALSE	FALSE	-0.0389605	1.57406	0.494253	0.720694
cg01386678	79066	METTL16	chr17	2323626	2323627	CGI-N-Shore	CGI-Shore	FALSE	TRUE	FALSE	0.20627	1.21743	0.534786	0.681208
cg01387771	30812	SOX8	chr16	1036944	1036945	CGI-S-Shore	CGI-Shore	FALSE	TRUE	FALSE	0.859791	2.72868	0.635631	0.847
cg01389506	54434	SSH1	chr12	109203581	109203582	CGI-N-Shore	CGI-Shore	FALSE	TRUE	FALSE	2.06918	3.72455	0.796247	0.913336
cg01391063	54777	TTC40	chr10	134645978	134645979	CGI-N-Shore	CGI-Shore	FALSE	TRUE	FALSE	-1.61392	-0.875804	0.24882	0.358942
cg01393234	10637	LEFTY1	chr1	226085079	226085080	Non-CGI	Non-CGI	FALSE	TRUE	FALSE	-0.204724	0.419385	0.466079	0.569109
cg01393939	8543	LMO4	chr1	87803705	87803706	CGI-S-Shelf	CGI-Shelf	FALSE	TRUE	FALSE	-0.8917	0.101111	0.351385	0.516536
cg01394349	388743	CAPN8	chr1	223840974	223840975	Non-CGI	Non-CGI	FALSE	TRUE	FALSE	1.05866	2.11326	0.670024	0.801333
cg01394847	NA	NA	chr16	73101069	73101070	CGI	CGI	FALSE	FALSE	TRUE	-0.715168	1.23752	0.387918	0.684725
cg01396723	5817	PVR	chr19	45146828	45146829	CGI-N-Shore	CGI-Shore	TRUE	FALSE	FALSE	-2.0724	-1.44093	0.195157	0.27396
cg01397507	22941	SHANK2	chr11	70440395	70440396	Non-CGI	Non-CGI	FALSE	TRUE	FALSE	0.963645	2.1426	0.656503	0.7927
cg01397775	NA	NA	chr11	63602805	63602806	CGI-N-Shelf	CGI-Shelf	FALSE	FALSE	TRUE	-0.314927	1.29379	0.446372	0.701909
cg01403030	158297	FAM154A	chr9	19026479	19026480	CGI-N-Shore	CGI-Shore	FALSE	TRUE	FALSE	-0.706987	0.945277	0.38165	0.648983
cg01403844	51643	TMBIM4	chr12	66565014	66565015	CGI-S-Shore	CGI-Shore	TRUE	FALSE	FALSE	2.49271	3.10494	0.845211	0.885326
cg01403844	84298	LLPH	chr12	66565014	66565015	CGI-S-Shore	CGI-Shore	TRUE	FALSE	FALSE	2.49271	3.10494	0.845211	0.885326
cg01411921	NA	NA	chr7	25893858	25893859	CGI-S-Shore	CGI-Shore	FALSE	FALSE	TRUE	-1.64984	-0.304174	0.2484	0.450056
cg01418527	6624	FSCN1	chr7	5631189	5631190	CGI-N-Shore	CGI-Shore	TRUE	FALSE	FALSE	-1.23097	2.43124	0.301241	0.824673
cg01420491	64342	HS1BP3	chr2	20834624	20834625	Non-CGI	Non-CGI	FALSE	TRUE	FALSE	-1.32945	-0.699636	0.285496	0.385467
cg01426818	NA	NA	chr17	77806444	77806445	CGI	CGI	FALSE	FALSE	TRUE	-1.12095	0.369363	0.317368	0.560319
cg01427142	135935	NOBOX	chr7	144101769	144101770	CGI-S-Shore	CGI-Shore	FALSE	TRUE	FALSE	2.02142	2.6644	0.798265	0.859071
cg01428378	84660	CCDC62	chr12	123259789	123259790	CGI-S-Shore	CGI-Shore	TRUE	TRUE	FALSE	-1.62064	-0.231673	0.257521	0.462286
cg01428849	9644	SH3PXD2A	chr10	105411075	105411076	Non-CGI	Non-CGI	FALSE	TRUE	FALSE	2.14207	2.89071	0.808741	0.871319
cg01430302	9100	USP10	chr16	84792860	84792861	Non-CGI	Non-CGI	FALSE	TRUE	FALSE	0.74384	1.48677	0.619416	0.728025
cg01432405	NA	NA	chr16	3205498	3205499	CGI-N-Shore	CGI-Shore	FALSE	FALSE	TRUE	2.35908	3.2085	0.830002	0.896961
cg01434302	64478	CSMD1	chr8	3267208	3267209	Non-CGI	Non-CGI	TRUE	TRUE	FALSE	0.000134072	0.744099	0.499795	0.617338
cg01437161	57494	RIMKLB	chr12	8834114	8834115	Non-CGI	Non-CGI	TRUE	FALSE	FALSE	-1.43152	0.28534	0.274843	0.546935
cg01437515	7293	TNFRSF4	chr1	1148315	1148316	CGI-N-Shore	CGI-Shore	FALSE	TRUE	FALSE	0.0599136	0.872699	0.510711	0.644888
cg01438868	NA	NA	chr3	177802381	177802382	Non-CGI	Non-CGI	FALSE	FALSE	TRUE	1.52855	2.41906	0.727928	0.831462
cg01439383	155185	AMZ1	chr7	2728776	2728777	CGI	CGI	FALSE	TRUE	FALSE	-1.07685	0.431104	0.324371	0.565521
cg01439568	29890	RBM15B	chr3	51429919	51429920	CGI	CGI	TRUE	FALSE	FALSE	2.78941	3.46026	0.868689	0.909738
cg01443433	114784	CSMD2	chr1	34014214	34014215	Non-CGI	Non-CGI	FALSE	TRUE	FALSE	1.29938	2.08582	0.700305	0.795947
cg01444149	80185	TTI2	chr8	33338897	33338898	CGI-N-Shelf	CGI-Shelf	FALSE	TRUE	FALSE	1.5347	2.31287	0.736001	0.817825
cg01444574	5433	POLR2D	chr2	128617328	128617329	CGI-S-Shore	CGI-Shore	TRUE	FALSE	FALSE	-0.523491	0.137181	0.41292	0.517771
cg01446620	7018	TF	chr3	133461738	133461739	CGI-N-Shelf	CGI-Shelf	FALSE	TRUE	FALSE	-2.17048	-1.41278	0.183552	0.281779
cg01446692	9350	CER1	chr9	14723496	14723497	Non-CGI	Non-CGI	TRUE	FALSE	FALSE	0.814988	1.49337	0.632753	0.734883
cg01447344	NA	NA	chr1	159989137	159989138	Non-CGI	Non-CGI	FALSE	FALSE	TRUE	1.05304	1.86954	0.671939	0.773171
cg01448470	84966	IGSF21	chr1	18518226	18518227	Non-CGI	Non-CGI	FALSE	TRUE	FALSE	-1.08357	-0.218063	0.328122	0.468371
cg01450522	NA	NA	chr3	13465878	13465879	CGI-S-Shelf	CGI-Shelf	FALSE	FALSE	TRUE	0.207603	2.4838	0.535613	0.819252
cg01450725	NA	NA	chr4	154714852	154714853	CGI-S-Shore	CGI-Shore	FALSE	FALSE	TRUE	-1.06387	1.9738	0.328359	0.765507
cg01451808	NA	NA	chr8	49676562	49676563	Non-CGI	Non-CGI	FALSE	FALSE	TRUE	-0.915656	0.185243	0.347643	0.525172
cg01452189	51451	LCMT1	chr16	25189426	25189427	Non-CGI	Non-CGI	FALSE	TRUE	FALSE	2.7749	3.55255	0.869662	0.916384
cg01452911	400550	FENDRR	chr16	86512095	86512096	Non-CGI	Non-CGI	FALSE	TRUE	FALSE	1.58575	2.32351	0.746106	0.828622
cg01454540	399829	LOC399829	chr10	134782773	134782774	CGI-S-Shelf	CGI-Shelf	FALSE	TRUE	FALSE	0.748166	1.40846	0.623022	0.721469
cg01454936	2195	FAT1	chr4	187628125	187628126	CGI	CGI	FALSE	TRUE	FALSE	2.47057	3.69125	0.835229	0.923012
cg01454951	317649	EIF4E3	chr3	71730677	71730678	Non-CGI	Non-CGI	FALSE	TRUE	FALSE	-1.72568	-0.430082	0.234252	0.430392
cg01458646	4855	NOTCH4	chr6	32171330	32171331	Non-CGI	Non-CGI	TRUE	TRUE	FALSE	-0.515685	0.163798	0.415913	0.526818
cg01462349	5799	PTPRN2	chr7	157664568	157664569	CGI-N-Shore	CGI-Shore	FALSE	TRUE	FALSE	1.12024	1.82263	0.683592	0.776651
cg01462453	NA	NA	chr7	155970262	155970263	CGI	CGI	FALSE	FALSE	TRUE	0.537756	1.78435	0.58722	0.768296
cg01462727	1591	CYP24A1	chr20	52786323	52786324	CGI-N-Shelf	CGI-Shelf	FALSE	TRUE	FALSE	-1.50689	0.381947	0.264322	0.563123
cg01463154	401463	LOC401463	chr8	65491938	65491939	CGI	CGI	TRUE	TRUE	FALSE	-1.15006	-0.468565	0.313086	0.424874
cg01463154	27319	BHLHE22	chr8	65491938	65491939	CGI	CGI	TRUE	TRUE	FALSE	-1.15006	-0.468565	0.313086	0.424874
cg01464515	27143	PALD1	chr10	72254323	72254324	Non-CGI	Non-CGI	FALSE	TRUE	FALSE	-1.52561	-0.706825	0.260983	0.393741
cg01467417	3557	IL1RN	chr2	113874068	113874069	Non-CGI	Non-CGI	TRUE	TRUE	FALSE	0.401447	1.85926	0.567435	0.771152
cg01468711	23475	QPRT	chr16	29706291	29706292	CGI	CGI	FALSE	TRUE	FALSE	-0.758815	1.34249	0.375809	0.679932
cg01468711	552900	BOLA2	chr16	29706291	29706292	CGI	CGI	FALSE	TRUE	FALSE	-0.758815	1.34249	0.375809	0.679932
cg01478628	NA	NA	chr11	20614302	20614303	CGI-N-Shelf	CGI-Shelf	FALSE	FALSE	TRUE	-0.378947	0.316271	0.437489	0.553424
cg01480180	8321	FZD1	chr7	90896329	90896330	CGI	CGI	TRUE	FALSE	FALSE	-2.20528	1.25768	0.182078	0.688752
cg01483139	2195	FAT1	chr4	187549458	187549459	Non-CGI	Non-CGI	FALSE	TRUE	FALSE	1.93118	3.27712	0.788113	0.892024
cg01484156	83988	NCALD	chr8	102802615	102802616	Non-CGI	Non-CGI	FALSE	TRUE	FALSE	-0.962094	-0.145501	0.341488	0.473077
cg01485117	7148	TNXB	chr6	32064677	32064678	CGI	CGI	FALSE	TRUE	FALSE	-1.75676	1.76941	0.2337	0.753663
cg01486558	22906	TRAK1	chr3	42132870	42132871	Non-CGI	Non-CGI	TRUE	FALSE	FALSE	-2.25285	-0.636688	0.178539	0.398765
cg01493412	NA	NA	chr2	2751889	2751890	CGI-N-Shelf	CGI-Shelf	FALSE	FALSE	TRUE	2.28218	3.06172	0.818175	0.886968
cg01494033	NA	NA	chr10	134819201	134819202	CGI	CGI	FALSE	FALSE	TRUE	0.553301	1.68414	0.593098	0.759384
cg01494454	586	BCAT1	chr12	25055214	25055215	CGI	CGI	TRUE	TRUE	FALSE	-1.00071	-0.148336	0.34273	0.477233
cg01495299	NA	NA	chr8	128003923	128003924	Non-CGI	Non-CGI	FALSE	FALSE	TRUE	-1.54615	-0.0338201	0.257722	0.49304
cg01495363	344558	SH3RF3	chr2	109747207	109747208	CGI-S-Shore	CGI-Shore	TRUE	TRUE	FALSE	-1.40758	-0.470928	0.279841	0.421556
cg01495363	100287216	SH3RF3-AS1	chr2	109747207	109747208	CGI-S-Shore	CGI-Shore	TRUE	TRUE	FALSE	-1.40758	-0.470928	0.279841	0.421556
cg01495509	30820	KCNIP1	chr5	169816378	169816379	Non-CGI	Non-CGI	TRUE	TRUE	FALSE	-1.51195	0.112572	0.26579	0.516191
cg01495509	3779	KCNMB1	chr5	169816378	169816379	Non-CGI	Non-CGI	TRUE	TRUE	FALSE	-1.51195	0.112572	0.26579	0.516191
cg01496380	126353	MISP	chr19	763654	763655	Non-CGI	Non-CGI	FALSE	TRUE	FALSE	1.45368	2.33277	0.72241	0.820381
cg01497613	NA	NA	chr17	48041301	48041302	CGI	CGI	FALSE	FALSE	TRUE	-1.56931	-0.244927	0.254279	0.456171
cg01498437	NA	NA	chr13	95401855	95401856	Non-CGI	Non-CGI	FALSE	FALSE	TRUE	-0.630336	0.0140284	0.397087	0.503254
cg01500311	3995	FADS3	chr11	61656094	61656095	CGI-N-Shelf	CGI-Shelf	FALSE	TRUE	FALSE	1.26867	2.42565	0.686105	0.828265
cg01502353	667	DST	chr6	56733843	56733844	Non-CGI	Non-CGI	FALSE	TRUE	FALSE	0.455029	2.45052	0.573982	0.824278
cg01504447	3146	HMGB1	chr13	31041221	31041222	CGI-S-Shore	CGI-Shore	TRUE	TRUE	FALSE	-1.13776	-0.410842	0.31675	0.434005
cg01508045	116113	FOXP4	chr6	41516162	41516163	CGI	CGI	FALSE	TRUE	FALSE	-1.24752	0.1291	0.300289	0.512658
cg01510388	9420	CYP7B1	chr8	65711658	65711659	CGI	CGI	TRUE	FALSE	FALSE	-0.274181	0.706439	0.458318	0.617114
cg01510990	9425	CDYL	chr6	4914643	4914644	Non-CGI	Non-CGI	FALSE	TRUE	FALSE	0.568476	1.43471	0.592745	0.71501
cg01515155	219437	OR5L1	chr11	55579363	55579364	Non-CGI	Non-CGI	TRUE	FALSE	FALSE	0.854847	1.50446	0.640132	0.732536
cg01515444	NA	NA	chr20	56292914	56292915	CGI-N-Shore	CGI-Shore	FALSE	FALSE	TRUE	0.00908106	1.14978	0.502841	0.674392
cg01516372	339524	LOC339524	chr1	87617972	87617973	CGI	CGI	FALSE	TRUE	FALSE	-1.78063	-0.523623	0.228149	0.418589
cg01517208	256435	ST6GALNAC3	chr1	76817670	76817671	Non-CGI	Non-CGI	FALSE	TRUE	FALSE	0.948699	1.61957	0.652879	0.747455
cg01517384	3106	HLA-B	chr6	31323856	31323857	CGI-N-Shore	CGI-Shore	TRUE	TRUE	FALSE	-0.102591	0.685107	0.483019	0.611494
cg01518225	NA	NA	chr8	1431308	1431309	CGI	CGI	FALSE	FALSE	TRUE	1.96601	2.77668	0.787151	0.864896
cg01518459	83636	C19orf12	chr19	30199590	30199591	Non-CGI	Non-CGI	FALSE	TRUE	FALSE	-0.166982	1.04328	0.47135	0.66595
cg01519063	79977	GRHL2	chr8	102505293	102505294	CGI-S-Shore	CGI-Shore	FALSE	TRUE	FALSE	1.85671	2.84686	0.772486	0.869316
cg01519261	861	RUNX1	chr21	36421467	36421468	Non-CGI	Non-CGI	TRUE	TRUE	FALSE	-2.49719	-0.942075	0.151996	0.35955
cg01520588	4188	MDFI	chr6	41604603	41604604	CGI-N-Shore	CGI-Shore	TRUE	FALSE	FALSE	-2.13775	-0.990186	0.188144	0.343125
cg01522296	400935	IL17REL	chr22	50452415	50452416	CGI-N-Shore	CGI-Shore	TRUE	FALSE	FALSE	-0.0631082	1.08301	0.489106	0.670441
cg01522425	23180	RFTN1	chr3	16525848	16525849	Non-CGI	Non-CGI	TRUE	TRUE	FALSE	-0.927891	1.61683	0.345829	0.729229
cg01522553	3749	KCNC4	chr1	110775554	110775555	Non-CGI	Non-CGI	FALSE	TRUE	FALSE	2.59163	3.28994	0.854019	0.905866
cg01522592	81544	GDPD5	chr11	75235311	75235312	CGI-N-Shore	CGI-Shore	FALSE	TRUE	FALSE	-0.724695	1.63341	0.380503	0.73354
cg01524894	56144	PCDHA4	chr5	140212752	140212753	CGI-N-Shore	CGI-Shore	TRUE	TRUE	FALSE	1.44282	2.22635	0.724923	0.817454
cg01524894	56147	PCDHA1	chr5	140212752	140212753	CGI-N-Shore	CGI-Shore	TRUE	TRUE	FALSE	1.44282	2.22635	0.724923	0.817454
cg01524894	56146	PCDHA2	chr5	140212752	140212753	CGI-N-Shore	CGI-Shore	TRUE	TRUE	FALSE	1.44282	2.22635	0.724923	0.817454
cg01524894	56142	PCDHA6	chr5	140212752	140212753	CGI-N-Shore	CGI-Shore	TRUE	TRUE	FALSE	1.44282	2.22635	0.724923	0.817454
cg01524894	56143	PCDHA5	chr5	140212752	140212753	CGI-N-Shore	CGI-Shore	TRUE	TRUE	FALSE	1.44282	2.22635	0.724923	0.817454
cg01524894	56141	PCDHA7	chr5	140212752	140212753	CGI-N-Shore	CGI-Shore	TRUE	TRUE	FALSE	1.44282	2.22635	0.724923	0.817454
cg01524894	56145	PCDHA3	chr5	140212752	140212753	CGI-N-Shore	CGI-Shore	TRUE	TRUE	FALSE	1.44282	2.22635	0.724923	0.817454
cg01526217	80746	TSEN2	chr3	12524194	12524195	CGI-N-Shore	CGI-Shore	TRUE	FALSE	FALSE	0.874981	1.50574	0.64378	0.732443
cg01532224	NA	NA	chr3	145881800	145881801	CGI-S-Shelf	CGI-Shelf	FALSE	FALSE	TRUE	0.335484	1.22533	0.55602	0.696219
cg01532284	284418	FAM71E2	chr19	55874851	55874852	CGI-S-Shore	CGI-Shore	TRUE	FALSE	FALSE	1.55952	2.97012	0.737827	0.873566
cg01537769	10082	GPC6	chr13	94075842	94075843	Non-CGI	Non-CGI	FALSE	TRUE	FALSE	-0.421974	1.48518	0.430869	0.70868
cg01538165	10499	NCOA2	chr8	71240128	71240129	Non-CGI	Non-CGI	FALSE	TRUE	FALSE	-0.709907	1.29104	0.381445	0.691977
cg01538305	NA	NA	chr14	100658948	100658949	CGI	CGI	FALSE	FALSE	TRUE	-1.71	-1.02379	0.241383	0.337946
cg01540949	84623	KIRREL3	chr11	126736629	126736630	CGI-S-Shelf	CGI-Shelf	FALSE	TRUE	FALSE	0.734902	1.4814	0.62104	0.729333
cg01542019	9524	TECR	chr19	14673053	14673054	CGI-N-Shore	CGI-Shore	FALSE	TRUE	FALSE	-2.93385	-1.21584	0.116651	0.32117
cg01542693	89766	UMODL1	chr21	43528794	43528795	CGI-N-Shore	CGI-Shore	TRUE	TRUE	FALSE	0.585783	1.79243	0.593358	0.75377
cg01542693	150147	C21orf128	chr21	43528794	43528795	CGI-N-Shore	CGI-Shore	TRUE	TRUE	FALSE	0.585783	1.79243	0.593358	0.75377
cg01544580	10951	CBX1	chr17	46180269	46180270	CGI-S-Shore	CGI-Shore	TRUE	FALSE	FALSE	0.0152679	1.30744	0.504605	0.693994
cg01544733	5707	PSMD1	chr2	231920892	231920893	CGI-N-Shore	CGI-Shore	TRUE	FALSE	FALSE	2.30546	3.2741	0.80845	0.89938
cg01544903	NA	NA	chr16	56697229	56697230	CGI	CGI	FALSE	FALSE	TRUE	-2.74457	-1.83194	0.134624	0.238793
cg01548743	NA	NA	chr14	92041398	92041399	CGI-S-Shore	CGI-Shore	TRUE	FALSE	FALSE	1.1247	2.8635	0.663281	0.858661
cg01549940	51390	AIG1	chr6	143382498	143382499	CGI-S-Shore	CGI-Shore	FALSE	TRUE	FALSE	-0.735906	0.0773428	0.381555	0.51279
cg01551133	NA	NA	chr1	10875522	10875523	Non-CGI	Non-CGI	FALSE	FALSE	TRUE	0.482718	1.13405	0.580489	0.681156
cg01551300	NA	NA	chr5	121435331	121435332	Non-CGI	Non-CGI	FALSE	FALSE	TRUE	1.95929	2.94714	0.790921	0.877719
cg01552197	NA	NA	chr1	88368887	88368888	Non-CGI	Non-CGI	FALSE	FALSE	TRUE	2.06823	3.00681	0.798797	0.87679
cg01552551	9844	ELMO1	chr7	37489651	37489652	CGI-S-Shore	CGI-Shore	TRUE	FALSE	FALSE	2.52441	3.20654	0.844281	0.896713
cg01554777	7097	TLR2	chr4	154622943	154622944	Non-CGI	Non-CGI	TRUE	TRUE	FALSE	0.652512	2.88637	0.604135	0.859983
cg01554970	NA	NA	chr16	88941173	88941174	CGI	CGI	FALSE	FALSE	TRUE	1.54444	2.40178	0.73296	0.825375
cg01556466	117	ADCYAP1R1	chr7	31146260	31146261	Non-CGI	Non-CGI	FALSE	TRUE	FALSE	-0.407903	0.439272	0.43179	0.574013
cg01556552	NA	NA	chr1	10695686	10695687	CGI	CGI	FALSE	FALSE	TRUE	-1.94195	-0.640455	0.207717	0.400647
cg01556799	285220	EPHA6	chr3	96844879	96844880	Non-CGI	Non-CGI	FALSE	TRUE	FALSE	-0.645406	0.403772	0.396419	0.567128
cg01557792	9766	KIAA0247	chr14	70162755	70162756	Non-CGI	Non-CGI	FALSE	TRUE	FALSE	0.245623	1.31706	0.542067	0.703597
cg01560900	23596	OPN3	chr1	241804128	241804129	CGI-S-Shore	CGI-Shore	TRUE	FALSE	FALSE	-1.30906	0.93426	0.290613	0.642852
cg01563071	131034	CPNE4	chr3	131647680	131647681	Non-CGI	Non-CGI	FALSE	TRUE	FALSE	0.940293	1.63541	0.649864	0.749315
cg01564135	2128	EVX1	chr7	27281216	27281217	CGI-S-Shore	CGI-Shore	TRUE	FALSE	FALSE	1.28415	2.83769	0.694554	0.841694
cg01568784	23682	RAB38	chr11	87908783	87908784	CGI	CGI	TRUE	FALSE	FALSE	-2.09015	-0.475494	0.199236	0.429506
cg01568919	11211	FZD10	chr12	130647890	130647891	CGI	CGI	TRUE	FALSE	FALSE	-1.23749	0.275038	0.308422	0.538237
cg01568919	440119	FZD10-AS1	chr12	130647890	130647891	CGI	CGI	TRUE	FALSE	FALSE	-1.23749	0.275038	0.308422	0.538237
cg01569052	260429	PRSS33	chr16	2837641	2837642	CGI-S-Shore	CGI-Shore	TRUE	FALSE	FALSE	-1.11852	-0.39645	0.319443	0.436778
cg01569346	7148	TNXB	chr6	32064148	32064149	CGI	CGI	FALSE	TRUE	FALSE	-0.59357	1.97502	0.408694	0.775906
cg01569601	NA	NA	chr21	46811242	46811243	CGI-N-Shore	CGI-Shore	FALSE	FALSE	TRUE	2.49803	3.30292	0.845523	0.900856
cg01569660	51285	RASL12	chr15	65369213	65369214	CGI	CGI	TRUE	FALSE	FALSE	2.20626	3.16029	0.81379	0.89579
cg01569660	390594	KBTBD13	chr15	65369213	65369214	CGI	CGI	TRUE	FALSE	FALSE	2.20626	3.16029	0.81379	0.89579
cg01570068	9920	KBTBD11	chr8	1937676	1937677	CGI-N-Shore	CGI-Shore	FALSE	TRUE	FALSE	2.94144	3.85833	0.87892	0.929821
cg01571842	NA	NA	chr3	57934672	57934673	Non-CGI	Non-CGI	FALSE	FALSE	TRUE	1.46315	2.30949	0.725313	0.817755
cg01571956	147920	IGFL2	chr19	46650284	46650285	Non-CGI	Non-CGI	TRUE	FALSE	FALSE	0.37411	1.13466	0.562373	0.676951
cg01572940	NA	NA	chr2	45398381	45398382	CGI-S-Shore	CGI-Shore	FALSE	FALSE	TRUE	0.0395131	1.3574	0.506478	0.696144
cg01574589	NA	NA	chr5	135532197	135532198	CGI-S-Shelf	CGI-Shelf	FALSE	FALSE	TRUE	-1.00381	0.720626	0.335489	0.606
cg01575836	NA	NA	chr11	15959856	15959857	CGI	CGI	FALSE	FALSE	TRUE	0.266497	1.92118	0.539225	0.758864
cg01576142	123036	TC2N	chr14	92297260	92297261	Non-CGI	Non-CGI	FALSE	TRUE	FALSE	0.0173582	1.32483	0.504073	0.701171
cg01576260	285401	LINC00698	chr3	63087235	63087236	Non-CGI	Non-CGI	TRUE	TRUE	FALSE	-0.324419	0.325227	0.447866	0.555167
cg01577187	8440	NCK2	chr2	106362832	106362833	CGI	CGI	FALSE	TRUE	FALSE	0.833605	1.60365	0.637385	0.735983
cg01577475	7849	PAX8	chr2	114033581	114033582	CGI	CGI	FALSE	TRUE	FALSE	-1.12337	-0.109034	0.326007	0.476274
cg01578265	NA	NA	chr5	114110567	114110568	Non-CGI	Non-CGI	TRUE	FALSE	FALSE	-0.83354	0.292181	0.365116	0.54533
cg01579216	4688	NCF2	chr1	183560913	183560914	Non-CGI	Non-CGI	TRUE	FALSE	FALSE	0.555308	1.36464	0.592766	0.709037
cg01579218	NA	NA	chr16	87312047	87312048	CGI-N-Shore	CGI-Shore	FALSE	TRUE	FALSE	0.121335	0.852512	0.521452	0.63764
cg01579289	27332	ZNF638	chr2	71503740	71503741	CGI	CGI	TRUE	FALSE	FALSE	-3.25323	-2.49758	0.0960327	0.161776
cg01579784	90139	TSPAN18	chr11	44952523	44952524	Non-CGI	Non-CGI	FALSE	TRUE	FALSE	-0.239932	0.882686	0.460456	0.645634
cg01580228	692072	SNORD5	chr11	93467095	93467096	Non-CGI	Non-CGI	TRUE	TRUE	FALSE	1.78633	2.89051	0.770194	0.875308
cg01580228	654320	SNORA8	chr11	93467095	93467096	Non-CGI	Non-CGI	TRUE	TRUE	FALSE	1.78633	2.89051	0.770194	0.875308
cg01580228	79101	TAF1D	chr11	93467095	93467096	Non-CGI	Non-CGI	TRUE	TRUE	FALSE	1.78633	2.89051	0.770194	0.875308
cg01580228	100302240	MIR1304	chr11	93467095	93467096	Non-CGI	Non-CGI	TRUE	TRUE	FALSE	1.78633	2.89051	0.770194	0.875308
cg01580228	677805	SNORA18	chr11	93467095	93467096	Non-CGI	Non-CGI	TRUE	TRUE	FALSE	1.78633	2.89051	0.770194	0.875308
cg01581360	55596	ZCCHC8	chr12	122986464	122986465	CGI-S-Shore	CGI-Shore	TRUE	FALSE	FALSE	1.10271	3.38535	0.672483	0.897824
cg01584000	4295	MLN	chr6	33767951	33767952	Non-CGI	Non-CGI	FALSE	TRUE	FALSE	1.04303	1.8344	0.669543	0.76684
cg01584939	NA	NA	chr22	37254322	37254323	CGI-S-Shore	CGI-Shore	FALSE	FALSE	TRUE	-0.635606	0.661906	0.394229	0.603566
cg01587662	NA	NA	chr19	29583604	29583605	CGI-N-Shore	CGI-Shore	FALSE	FALSE	TRUE	1.75277	2.70202	0.767113	0.859537
cg01589353	140707	BRI3BP	chr12	125500634	125500635	CGI	CGI	FALSE	TRUE	FALSE	2.36878	3.2196	0.823302	0.895406
cg01589580	9150	CTDP1	chr18	77440800	77440801	CGI	CGI	TRUE	TRUE	FALSE	-1.7408	-0.00889779	0.236814	0.501659
cg01590948	11346	SYNPO	chr5	150004773	150004774	CGI	CGI	FALSE	TRUE	FALSE	-1.97189	-0.882906	0.208073	0.369168
cg01591025	26031	OSBPL3	chr7	25018595	25018596	CGI	CGI	FALSE	TRUE	FALSE	0.643918	1.35662	0.604915	0.713745
cg01593673	3213	HOXB3	chr17	46648014	46648015	CGI-S-Shore	CGI-Shore	FALSE	TRUE	FALSE	-2.16143	0.0530164	0.1873	0.501149
cg01593740	NA	NA	chr6	170733450	170733451	CGI-S-Shore	CGI-Shore	FALSE	FALSE	TRUE	-0.844199	-0.117682	0.362767	0.479786
cg01594125	NA	NA	chr4	185905070	185905071	CGI-N-Shore	CGI-Shore	FALSE	FALSE	TRUE	-0.851745	0.0491723	0.361897	0.510203
cg01594538	NA	NA	chr16	54689221	54689222	CGI-S-Shelf	CGI-Shelf	FALSE	FALSE	TRUE	-2.13182	-1.26415	0.187908	0.306293
cg01596674	64855	FAM129B	chr9	130342290	130342291	Non-CGI	Non-CGI	TRUE	FALSE	FALSE	-0.211086	0.7798	0.463986	0.598711
cg01597387	728635	DHRS4L1	chr14	24458208	24458209	CGI	CGI	TRUE	TRUE	FALSE	-1.40229	-0.040591	0.287944	0.483174
cg01597387	10901	DHRS4	chr14	24458208	24458209	CGI	CGI	TRUE	TRUE	FALSE	-1.40229	-0.040591	0.287944	0.483174
cg01597387	317749	DHRS4L2	chr14	24458208	24458209	CGI	CGI	TRUE	TRUE	FALSE	-1.40229	-0.040591	0.287944	0.483174
cg01601476	54566	EPB41L4B	chr9	112080848	112080849	CGI-N-Shore	CGI-Shore	FALSE	TRUE	FALSE	-0.00777792	0.977555	0.497539	0.654955
cg01601658	NA	NA	chr6	168785524	168785525	CGI-S-Shore	CGI-Shore	FALSE	FALSE	TRUE	-2.99398	-2.15047	0.11245	0.19705
cg01602153	90362	FAM110B	chr8	59058660	59058661	CGI	CGI	TRUE	TRUE	FALSE	-0.474466	0.843504	0.429803	0.636365
cg01602166	149345	SHISA4	chr1	201856763	201856764	CGI-N-Shore	CGI-Shore	TRUE	FALSE	FALSE	1.63713	2.9759	0.745673	0.870767
cg01603396	4488	MSX2	chr5	174154199	174154200	CGI-S-Shore	CGI-Shore	FALSE	TRUE	FALSE	2.32682	3.22033	0.826898	0.895986
cg01604009	NA	NA	chr2	67102333	67102334	Non-CGI	Non-CGI	FALSE	FALSE	TRUE	1.6244	2.26474	0.746424	0.818707
cg01604404	NA	NA	chr2	237460590	237460591	Non-CGI	Non-CGI	FALSE	FALSE	TRUE	2.16731	3.03924	0.810648	0.882161
cg01604994	116987	AGAP1	chr2	236867836	236867837	CGI	CGI	FALSE	TRUE	FALSE	1.26407	2.72572	0.687428	0.855026
cg01605921	114821	SCAND3	chr6	28545895	28545896	Non-CGI	Non-CGI	FALSE	TRUE	FALSE	-0.385174	0.29915	0.436414	0.547796
cg01606027	3985	LIMK2	chr22	31607212	31607213	CGI-N-Shore	CGI-Shore	TRUE	FALSE	FALSE	0.563862	1.85934	0.592893	0.77514
cg01606878	2131	EXT1	chr8	119065431	119065432	Non-CGI	Non-CGI	FALSE	TRUE	FALSE	0.051646	2.98175	0.508803	0.843484
cg01608788	553158	PRR5-ARHGAP8	chr22	45098907	45098908	CGI	CGI	FALSE	TRUE	FALSE	-3.35046	-2.03853	0.0947214	0.221813
cg01608788	55615	PRR5	chr22	45098907	45098908	CGI	CGI	FALSE	TRUE	FALSE	-3.35046	-2.03853	0.0947214	0.221813
cg01610231	5308	PITX2	chr4	111555314	111555315	CGI	CGI	TRUE	TRUE	FALSE	-2.09619	0.50267	0.211271	0.577762
cg01611017	79789	CLMN	chr14	95780344	95780345	Non-CGI	Non-CGI	FALSE	TRUE	FALSE	-2.37237	-1.68031	0.165247	0.25382
cg01611777	9448	MAP4K4	chr2	102359027	102359028	Non-CGI	Non-CGI	FALSE	TRUE	FALSE	-1.5624	-0.57697	0.25678	0.406503
cg01612037	NA	NA	chr12	130765389	130765390	CGI	CGI	FALSE	FALSE	TRUE	0.431168	1.29071	0.572183	0.689176
cg01612285	191585	PLAC4	chr21	42549684	42549685	Non-CGI	Non-CGI	TRUE	TRUE	FALSE	1.27691	2.84709	0.703525	0.868689
cg01612285	25825	BACE2	chr21	42549684	42549685	Non-CGI	Non-CGI	TRUE	TRUE	FALSE	1.27691	2.84709	0.703525	0.868689
cg01616876	8437	RASAL1	chr12	113544928	113544929	CGI-S-Shelf	CGI-Shelf	FALSE	TRUE	FALSE	1.95993	2.70432	0.792447	0.864092
cg01616926	5308	PITX2	chr4	111558602	111558603	CGI	CGI	TRUE	TRUE	FALSE	-2.97422	-2.07803	0.114148	0.198715
cg01618806	NA	NA	chr2	3814539	3814540	Non-CGI	Non-CGI	FALSE	FALSE	TRUE	0.0229677	1.12715	0.504397	0.685064
cg01620410	91807	MYLK3	chr16	46791076	46791077	Non-CGI	Non-CGI	FALSE	TRUE	FALSE	0.397622	2.38768	0.562445	0.823483
cg01620540	3356	HTR2A	chr13	47472064	47472065	CGI-S-Shelf	CGI-Shelf	TRUE	FALSE	FALSE	2.06618	3.12282	0.797834	0.891098
cg01622006	NA	NA	chr6	170463397	170463398	CGI	CGI	FALSE	FALSE	TRUE	-2.95656	-1.45404	0.116596	0.295399
cg01624004	9311	ASIC3	chr7	150745494	150745495	CGI-N-Shore	CGI-Shore	TRUE	FALSE	FALSE	0.236009	1.05629	0.540367	0.671588
cg01626459	667	DST	chr6	56820778	56820779	CGI-S-Shore	CGI-Shore	TRUE	TRUE	FALSE	-1.68391	-0.27963	0.240831	0.45461
cg01626459	221336	BEND6	chr6	56820778	56820779	CGI-S-Shore	CGI-Shore	TRUE	TRUE	FALSE	-1.68391	-0.27963	0.240831	0.45461
cg01627212	NA	NA	chr16	86715410	86715411	CGI	CGI	FALSE	FALSE	TRUE	-1.48007	0.366216	0.269282	0.556501
cg01627304	1674	DES	chr2	220290871	220290872	Non-CGI	Non-CGI	FALSE	TRUE	FALSE	2.34538	3.16286	0.829924	0.89128
cg01628881	NA	NA	chr2	388372	388373	CGI-N-Shelf	CGI-Shelf	FALSE	FALSE	TRUE	1.882	3.39702	0.771974	0.910507
cg01630691	659	BMPR2	chr2	203359167	203359168	CGI-N-Shore	CGI-Shore	FALSE	TRUE	FALSE	-0.0924867	1.87854	0.484263	0.771525
cg01634388	NA	NA	chr4	129405035	129405036	Non-CGI	Non-CGI	FALSE	TRUE	FALSE	1.77441	2.64937	0.763269	0.857023
cg01635555	NA	NA	chr16	73101264	73101265	CGI-S-Shore	CGI-Shore	FALSE	FALSE	TRUE	-0.833903	1.38212	0.366004	0.706022
cg01636354	51421	AMOTL2	chr3	134078647	134078648	CGI-N-Shore	CGI-Shore	FALSE	TRUE	FALSE	1.12038	1.92903	0.681653	0.78311
cg01637789	7057	THBS1	chr15	39875777	39875778	CGI-S-Shelf	CGI-Shelf	FALSE	TRUE	FALSE	0.332952	1.41746	0.556245	0.714262
cg01640684	6904	TBCD	chr17	80870529	80870530	CGI-S-Shore	CGI-Shore	FALSE	TRUE	FALSE	2.38272	3.20607	0.833214	0.898171
cg01641371	23098	SARM1	chr17	26712092	26712093	CGI	CGI	FALSE	TRUE	FALSE	1.34297	2.05609	0.710998	0.798342
cg01643441	4149	MAX	chr14	65567845	65567846	CGI-N-Shore	CGI-Shore	FALSE	TRUE	FALSE	0.233222	1.53377	0.535665	0.733074
cg01644640	100128590	SLC8A1-AS1	chr2	40147801	40147802	Non-CGI	Non-CGI	FALSE	TRUE	FALSE	2.29655	3.1519	0.824999	0.8953
cg01644702	NA	NA	chr2	192656596	192656597	Non-CGI	Non-CGI	FALSE	FALSE	TRUE	0.570036	3.31989	0.590589	0.89457
cg01644741	441951	ZFAS1	chr20	47896888	47896889	CGI-S-Shore	CGI-Shore	TRUE	TRUE	FALSE	-0.764467	0.656044	0.372937	0.605047
cg01644741	100113393	SNORD12B	chr20	47896888	47896889	CGI-S-Shore	CGI-Shore	TRUE	TRUE	FALSE	-0.764467	0.656044	0.372937	0.605047
cg01644741	692057	SNORD12	chr20	47896888	47896889	CGI-S-Shore	CGI-Shore	TRUE	TRUE	FALSE	-0.764467	0.656044	0.372937	0.605047
cg01645729	NA	NA	chr2	131582240	131582241	CGI-N-Shore	CGI-Shore	FALSE	FALSE	TRUE	-3.3762	-2.6723	0.0884573	0.145891
cg01646784	3957	LGALS2	chr22	37976725	37976726	Non-CGI	Non-CGI	TRUE	FALSE	FALSE	1.63874	3.04495	0.746681	0.882879
cg01648376	138046	RALYL	chr8	85685344	85685345	Non-CGI	Non-CGI	FALSE	TRUE	FALSE	0.0869781	1.04592	0.514017	0.667458
cg01649584	8398	PLA2G6	chr22	38516149	38516150	CGI-N-Shore	CGI-Shore	FALSE	TRUE	FALSE	0.589503	2.04724	0.596938	0.788585
cg01649867	NA	NA	chr4	155056878	155056879	CGI-N-Shore	CGI-Shore	FALSE	FALSE	TRUE	3.34357	4.12728	0.895298	0.94436
cg01650818	321	APBA2	chr15	29247458	29247459	Non-CGI	Non-CGI	FALSE	TRUE	FALSE	-1.29184	-0.509405	0.292002	0.414539
cg01650864	NA	NA	chr7	25734378	25734379	Non-CGI	Non-CGI	FALSE	FALSE	TRUE	-0.408275	0.894041	0.430759	0.635727
cg01651250	7148	TNXB	chr6	32060681	32060682	CGI-N-Shelf	CGI-Shelf	FALSE	TRUE	FALSE	-2.42185	-0.305991	0.162222	0.449901
cg01651378	NA	NA	chr13	50421918	50421919	CGI-N-Shore	CGI-Shore	FALSE	FALSE	TRUE	0.248168	1.41249	0.542836	0.707887
cg01656996	10376	TUBA1B	chr12	49526897	49526898	CGI-S-Shore	CGI-Shore	TRUE	FALSE	FALSE	0.424148	1.94352	0.57076	0.781796
cg01657761	400456	LOC400456	chr15	95836283	95836284	Non-CGI	Non-CGI	FALSE	TRUE	FALSE	1.91142	2.70343	0.78024	0.855502
cg01658047	10612	TRIM3	chr11	6470133	6470134	Non-CGI	Non-CGI	FALSE	TRUE	FALSE	3.00586	3.9231	0.873132	0.936441
cg01659038	NA	NA	chr2	23371714	23371715	Non-CGI	Non-CGI	FALSE	FALSE	TRUE	1.05268	2.15632	0.666849	0.809444
cg01659586	9922	IQSEC1	chr3	13114343	13114344	CGI-N-Shore	CGI-Shore	FALSE	TRUE	FALSE	-0.294934	0.663054	0.45286	0.608659
cg01660999	284	ANGPT1	chr8	108468421	108468422	Non-CGI	Non-CGI	FALSE	TRUE	FALSE	-1.57767	0.902148	0.252737	0.629808
cg01663677	NA	NA	chr7	134396931	134396932	Non-CGI	Non-CGI	FALSE	FALSE	TRUE	-2.84245	0.146146	0.125199	0.512641
cg01664382	NA	NA	chr6	170490375	170490376	CGI	CGI	FALSE	FALSE	TRUE	0.657673	2.50598	0.604265	0.843482
cg01664864	100302145	MIR1247	chr14	102027677	102027678	CGI	CGI	TRUE	FALSE	FALSE	-1.83256	-1.15663	0.225975	0.317095
cg01664864	1735	DIO3	chr14	102027677	102027678	CGI	CGI	TRUE	FALSE	FALSE	-1.83256	-1.15663	0.225975	0.317095
cg01666416	NA	NA	chr7	129401208	129401209	CGI-N-Shore	CGI-Shore	FALSE	FALSE	TRUE	1.21137	2.03654	0.695286	0.793488
cg01666436	79981	FRMD1	chr6	168473292	168473293	CGI	CGI	FALSE	TRUE	FALSE	-1.06726	1.94885	0.337924	0.756742
cg01667837	2861	GPR37	chr7	124405605	124405606	CGI	CGI	TRUE	FALSE	FALSE	-2.81087	-2.12673	0.12679	0.196628
cg01668008	NA	NA	chr8	134701487	134701488	Non-CGI	Non-CGI	FALSE	FALSE	TRUE	-0.769229	1.73768	0.376738	0.740397
cg01670714	83658	DYNLRB1	chr20	33111318	33111319	Non-CGI	Non-CGI	FALSE	TRUE	FALSE	-1.28061	1.23972	0.29242	0.685138
cg01671575	79605	PGBD5	chr1	230513566	230513567	Non-CGI	Non-CGI	TRUE	FALSE	FALSE	0.651966	1.42294	0.606642	0.717874
cg01673674	392255	GDF6	chr8	97166036	97166037	CGI	CGI	FALSE	TRUE	FALSE	0.760185	2.64488	0.62531	0.849954
cg01673780	55801	IL26	chr12	68619593	68619594	Non-CGI	Non-CGI	TRUE	FALSE	FALSE	-0.267488	0.749694	0.453574	0.60977
cg01676959	153657	TTC23L	chr5	34838588	34838589	CGI-N-Shore	CGI-Shore	TRUE	FALSE	FALSE	3.27679	3.95101	0.903553	0.92575
cg01679512	113622	ADPRHL1	chr13	114108652	114108653	CGI	CGI	TRUE	FALSE	FALSE	1.29535	2.07799	0.697474	0.802838
cg01680010	NA	NA	chr7	96647117	96647118	CGI	CGI	FALSE	FALSE	TRUE	-2.00073	-0.0624264	0.205584	0.480069
cg01680674	54715	RBFOX1	chr16	6256201	6256202	Non-CGI	Non-CGI	FALSE	TRUE	FALSE	-0.738594	0.027078	0.385433	0.504939
cg01681098	100507392	FLI1-AS1	chr11	128566009	128566010	CGI-S-Shore	CGI-Shore	TRUE	TRUE	FALSE	0.622611	3.05767	0.594085	0.86258
cg01681098	2313	FLI1	chr11	128566009	128566010	CGI-S-Shore	CGI-Shore	TRUE	TRUE	FALSE	0.622611	3.05767	0.594085	0.86258
cg01684256	1137	CHRNA4	chr20	61977221	61977222	CGI-S-Shore	CGI-Shore	FALSE	TRUE	FALSE	-1.9201	0.143119	0.209952	0.525151
cg01686177	NA	NA	chr7	21452797	21452798	Non-CGI	Non-CGI	FALSE	FALSE	TRUE	-2.48634	-1.37952	0.152839	0.292257
cg01687040	117159	DCD	chr12	55043559	55043560	Non-CGI	Non-CGI	TRUE	FALSE	FALSE	-0.12669	0.578661	0.48269	0.596382
cg01691104	54549	SDK2	chr17	71612776	71612777	Non-CGI	Non-CGI	FALSE	TRUE	FALSE	-0.847912	0.120256	0.364782	0.520168
cg01691377	23478	SEC11A	chr15	85212822	85212823	CGI-N-Shelf	CGI-Shelf	FALSE	TRUE	FALSE	0.990269	2.068	0.648604	0.802635
cg01692626	1778	DYNC1H1	chr14	102504880	102504881	CGI	CGI	FALSE	TRUE	FALSE	2.67531	3.48738	0.860233	0.914185
cg01694939	66005	CHID1	chr11	882636	882637	CGI-S-Shore	CGI-Shore	TRUE	TRUE	FALSE	0.0945833	2.4711	0.516277	0.808245
cg01695994	NA	NA	chr17	80246403	80246404	CGI-N-Shelf	CGI-Shelf	FALSE	FALSE	TRUE	-0.985168	0.219725	0.345083	0.534504
cg01696784	23677	SH3BP4	chr2	235904501	235904502	CGI	CGI	TRUE	TRUE	FALSE	-0.123324	2.65089	0.479894	0.828578
cg01696984	9175	MAP3K13	chr3	185080356	185080357	Non-CGI	Non-CGI	TRUE	TRUE	FALSE	0.339667	1.12398	0.549945	0.682953
cg01698298	220001	VWCE	chr11	61062964	61062965	CGI	CGI	TRUE	FALSE	FALSE	-1.41153	-0.540866	0.278045	0.41284
cg01700462	128506	OCSTAMP	chr20	45179230	45179231	Non-CGI	Non-CGI	TRUE	FALSE	FALSE	-0.885114	0.520067	0.356071	0.579586
cg01701303	NA	NA	chr13	114060627	114060628	CGI	CGI	FALSE	FALSE	TRUE	0.371794	2.82432	0.559444	0.847362
cg01702839	51388	NIP7	chr16	69375596	69375597	CGI-S-Shore	CGI-Shore	FALSE	TRUE	FALSE	0.816254	3.0879	0.630811	0.886207
cg01703246	NA	NA	chr8	2127431	2127432	CGI	CGI	FALSE	FALSE	TRUE	0.252128	1.03533	0.543286	0.667639
cg01707820	114818	KLHL29	chr2	23819033	23819034	Non-CGI	Non-CGI	FALSE	TRUE	FALSE	-0.946961	0.9477	0.344432	0.632907
cg01708636	1363	CPE	chr4	166301085	166301086	CGI-S-Shore	CGI-Shore	FALSE	TRUE	FALSE	1.7243	2.8803	0.754014	0.86137
cg01709975	23231	SEL1L3	chr4	25847472	25847473	Non-CGI	Non-CGI	FALSE	TRUE	FALSE	1.85085	3.02553	0.776854	0.887177
cg01710361	22996	TTC39A	chr1	51769687	51769688	Non-CGI	Non-CGI	FALSE	TRUE	FALSE	-0.783814	0.193583	0.372114	0.530268
cg01713250	63976	PRDM16	chr1	3289915	3289916	CGI	CGI	FALSE	TRUE	FALSE	-1.20177	1.63515	0.323083	0.733165
cg01716252	104	ADARB1	chr21	46552605	46552606	CGI-N-Shore	CGI-Shore	FALSE	TRUE	FALSE	2.33664	3.47359	0.830428	0.905247
cg01717446	27332	ZNF638	chr2	71503566	71503567	CGI	CGI	TRUE	FALSE	FALSE	-1.78748	-1.12027	0.226218	0.324325
cg01719898	4009	LMX1A	chr1	165327830	165327831	CGI-S-Shore	CGI-Shore	TRUE	FALSE	FALSE	3.03155	3.65932	0.885834	0.924725
cg01724607	NA	NA	chr6	99278360	99278361	CGI-S-Shore	CGI-Shore	FALSE	FALSE	TRUE	-0.0738723	0.807302	0.491413	0.629378
cg01726065	374654	KIF7	chr15	90171768	90171769	CGI	CGI	FALSE	TRUE	FALSE	1.3716	2.60735	0.71737	0.848203
cg01727585	64410	KLHL25	chr15	86313372	86313373	CGI-S-Shore	CGI-Shore	TRUE	TRUE	FALSE	1.57956	2.19583	0.74252	0.812929
cg01731811	5799	PTPRN2	chr7	157890171	157890172	CGI-N-Shore	CGI-Shore	FALSE	TRUE	FALSE	-0.412307	1.17017	0.432189	0.682376
cg01733133	NA	NA	chr6	159290283	159290284	CGI-N-Shore	CGI-Shore	FALSE	FALSE	TRUE	-1.85385	-1.00225	0.218493	0.35597
cg01733904	NA	NA	chr13	110493045	110493046	Non-CGI	Non-CGI	FALSE	FALSE	TRUE	-2.07794	-0.870332	0.195068	0.366685
cg01734045	84570	COL25A1	chr4	109967535	109967536	Non-CGI	Non-CGI	FALSE	TRUE	FALSE	2.36976	3.61979	0.825536	0.920939
cg01735082	2487	FRZB	chr2	183719355	183719356	Non-CGI	Non-CGI	FALSE	TRUE	FALSE	-1.83596	-0.476542	0.221282	0.423054
cg01735503	11060	WWP2	chr16	69966815	69966816	CGI	CGI	TRUE	TRUE	FALSE	0.693894	2.83389	0.611898	0.864537
cg01735503	406932	MIR140	chr16	69966815	69966816	CGI	CGI	TRUE	TRUE	FALSE	0.693894	2.83389	0.611898	0.864537
cg01738164	NA	NA	chr14	90147503	90147504	Non-CGI	Non-CGI	FALSE	FALSE	TRUE	0.441705	1.35432	0.57311	0.714085
cg01738638	334	APLP2	chr11	129938601	129938602	CGI-N-Shore	CGI-Shore	TRUE	FALSE	FALSE	0.692425	1.57809	0.614782	0.732146
cg01739354	NA	NA	chr6	170481630	170481631	CGI	CGI	FALSE	FALSE	TRUE	-0.294439	0.6209	0.453255	0.597523
cg01739960	NA	NA	chr15	96715164	96715165	Non-CGI	Non-CGI	FALSE	FALSE	TRUE	2.39158	3.69039	0.833555	0.920048
cg01740766	NA	NA	chr6	44528958	44528959	CGI-S-Shore	CGI-Shore	FALSE	FALSE	TRUE	-1.40537	0.297557	0.276709	0.545594
cg01741038	5288	PIK3C2G	chr12	18414933	18414934	Non-CGI	Non-CGI	FALSE	TRUE	FALSE	1.87538	2.86282	0.782037	0.869367
cg01744412	NA	NA	chr13	34736499	34736500	Non-CGI	Non-CGI	FALSE	FALSE	TRUE	-0.992694	0.27878	0.340437	0.537834
cg01745499	3159	HMGA1	chr6	34206084	34206085	CGI	CGI	TRUE	TRUE	FALSE	-1.04483	0.691645	0.329402	0.612284
cg01747862	79804	HAND2-AS1	chr4	174457371	174457372	CGI-N-Shore	CGI-Shore	FALSE	TRUE	FALSE	-0.362261	2.0776	0.441481	0.798125
cg01749742	NA	NA	chr2	18944047	18944048	Non-CGI	Non-CGI	FALSE	FALSE	TRUE	-1.35223	0.937074	0.285378	0.645899
cg01749904	1800	DPEP1	chr16	89687052	89687053	CGI-N-Shore	CGI-Shore	TRUE	TRUE	FALSE	-0.936018	-0.08531	0.34522	0.486767
cg01750611	9618	TRAF4	chr17	27072015	27072016	CGI	CGI	FALSE	TRUE	FALSE	-3.28934	-2.6065	0.0935681	0.149686
cg01750895	10400	PEMT	chr17	17463041	17463042	CGI-N-Shelf	CGI-Shelf	FALSE	TRUE	FALSE	1.37847	2.57354	0.719238	0.851028
cg01751917	25960	GPR124	chr8	37658571	37658572	CGI-S-Shelf	CGI-Shelf	FALSE	TRUE	FALSE	1.22227	2.76218	0.688312	0.866946
cg01753209	54090	LINC00111	chr21	43098516	43098517	CGI-N-Shelf	CGI-Shelf	TRUE	FALSE	FALSE	1.57474	3.22185	0.738507	0.890205
cg01753966	4043	LRPAP1	chr4	3531945	3531946	CGI	CGI	FALSE	TRUE	FALSE	1.59794	3.10482	0.742632	0.890573
cg01759909	100996291	LOC100996291	chr17	76264540	76264541	Non-CGI	Non-CGI	FALSE	FALSE	TRUE	-1.92448	-0.765295	0.210132	0.374245
cg01759986	284788	LOC284788	chr20	22401074	22401075	Non-CGI	Non-CGI	TRUE	FALSE	FALSE	1.98558	2.94959	0.791276	0.879696
cg01760100	11105	PRDM7	chr16	90130162	90130163	Non-CGI	Non-CGI	TRUE	TRUE	FALSE	1.17908	1.9183	0.688897	0.78842
cg01760103	168391	GALNTL5	chr7	151664041	151664042	Non-CGI	Non-CGI	TRUE	TRUE	FALSE	1.84067	2.62786	0.769563	0.856301
cg01760983	23765	IL17RA	chr22	17587971	17587972	CGI-N-Shore	CGI-Shore	FALSE	TRUE	FALSE	-0.121899	2.79219	0.478958	0.865349
cg01766396	130132	RFTN2	chr2	198436483	198436484	Non-CGI	Non-CGI	FALSE	TRUE	FALSE	-1.36479	-0.74204	0.281843	0.377601
cg01766699	56171	DNAH7	chr2	196602679	196602680	Non-CGI	Non-CGI	FALSE	TRUE	FALSE	1.04936	2.04957	0.661897	0.794917
cg01770296	375056	MIA3	chr1	222792554	222792555	CGI	CGI	FALSE	TRUE	FALSE	-1.64322	-0.864328	0.246512	0.365143
cg01771065	NA	NA	chr14	102102407	102102408	CGI-S-Shore	CGI-Shore	FALSE	FALSE	TRUE	-0.594363	0.84622	0.402873	0.634708
cg01771213	1600	DAB1	chr1	57735838	57735839	Non-CGI	Non-CGI	FALSE	TRUE	FALSE	-0.208645	1.65637	0.467091	0.750944
cg01776172	5314	PKHD1	chr6	51481908	51481909	Non-CGI	Non-CGI	FALSE	TRUE	FALSE	-0.529555	0.327145	0.41307	0.555601
cg01777341	11226	GALNT6	chr12	51784862	51784863	CGI-N-Shore	CGI-Shore	TRUE	TRUE	FALSE	1.1551	1.77537	0.683641	0.765847
cg01777341	9498	SLC4A8	chr12	51784862	51784863	CGI-N-Shore	CGI-Shore	TRUE	TRUE	FALSE	1.1551	1.77537	0.683641	0.765847
cg01777433	NA	NA	chr5	57875838	57875839	CGI-N-Shelf	CGI-Shelf	FALSE	FALSE	TRUE	-0.026192	0.602074	0.495443	0.600563
cg01778994	6482	ST3GAL1	chr8	134511683	134511684	Non-CGI	Non-CGI	FALSE	TRUE	FALSE	-2.07461	-1.33717	0.193435	0.289344
cg01779740	2843	GPR20	chr8	142366708	142366709	CGI-N-Shore	CGI-Shore	FALSE	TRUE	FALSE	0.563634	1.71493	0.592946	0.757912
cg01780009	146712	B3GNTL1	chr17	80944193	80944194	CGI	CGI	FALSE	TRUE	FALSE	-2.06357	-1.23026	0.19588	0.308476
cg01781417	84552	PARD6G	chr18	78004045	78004046	CGI-N-Shore	CGI-Shore	FALSE	TRUE	FALSE	-0.697085	0.587716	0.382838	0.593602
cg01781529	54361	WNT4	chr1	22444030	22444031	CGI-N-Shelf	CGI-Shelf	FALSE	TRUE	FALSE	-0.591841	0.991762	0.399982	0.653419
cg01781725	NA	NA	chr16	1047460	1047461	CGI-N-Shore	CGI-Shore	FALSE	FALSE	TRUE	-1.90649	-0.980878	0.215849	0.348002
cg01782790	NA	NA	chr1	163393050	163393051	CGI-S-Shore	CGI-Shore	FALSE	FALSE	TRUE	1.27963	2.18216	0.70149	0.818424
cg01784825	NA	NA	chr11	61377918	61377919	Non-CGI	Non-CGI	FALSE	FALSE	TRUE	1.73146	2.55682	0.764086	0.841873
cg01784928	57156	TMEM63C	chr14	77647704	77647705	CGI-N-Shore	CGI-Shore	TRUE	FALSE	FALSE	-0.286273	0.369481	0.454005	0.563049
cg01786360	NA	NA	chr6	106804977	106804978	CGI-N-Shelf	CGI-Shelf	FALSE	FALSE	TRUE	0.78352	1.95051	0.625538	0.786387
cg01787084	79791	FBXO31	chr16	87371097	87371098	CGI-S-Shelf	CGI-Shelf	FALSE	TRUE	FALSE	2.5732	4.02515	0.841153	0.935994
cg01788444	141	ADPRH	chr3	119308390	119308391	Non-CGI	Non-CGI	FALSE	TRUE	FALSE	-2.22662	-1.08242	0.178296	0.327992
cg01789499	56978	PRDM8	chr4	81109888	81109889	CGI-N-Shore	CGI-Shore	FALSE	TRUE	FALSE	2.44351	4.21397	0.829657	0.946769
cg01789980	23286	WWC1	chr5	167743144	167743145	Non-CGI	Non-CGI	FALSE	TRUE	FALSE	0.0119023	0.644834	0.502027	0.606067
cg01790002	2128	EVX1	chr7	27283545	27283546	CGI	CGI	FALSE	TRUE	FALSE	-1.30518	-0.105726	0.294714	0.484761
cg01790083	56246	MRAP	chr21	33671181	33671182	CGI-N-Shore	CGI-Shore	TRUE	TRUE	FALSE	-0.515954	0.927669	0.414853	0.642569
cg01794802	170679	PSORS1C1	chr6	31096931	31096932	Non-CGI	Non-CGI	FALSE	TRUE	FALSE	1.7533	2.76857	0.764833	0.855744
cg01795776	NA	NA	chr1	23003462	23003463	CGI-N-Shore	CGI-Shore	FALSE	FALSE	TRUE	1.43759	2.37083	0.72817	0.823585
cg01796166	NA	NA	chr14	95239586	95239587	CGI	CGI	FALSE	FALSE	TRUE	-1.10841	0.759237	0.328284	0.622917
cg01797450	NA	NA	chr6	168134760	168134761	CGI-S-Shelf	CGI-Shelf	FALSE	FALSE	TRUE	-2.74148	-1.27257	0.131088	0.312525
cg01799115	NA	NA	chr8	135827395	135827396	Non-CGI	Non-CGI	FALSE	FALSE	TRUE	1.72664	2.63456	0.761676	0.857888
cg01801101	155185	AMZ1	chr7	2738925	2738926	CGI	CGI	FALSE	TRUE	FALSE	1.1389	2.43985	0.683213	0.836045
cg01802493	NA	NA	chr12	130530121	130530122	CGI	CGI	FALSE	FALSE	TRUE	-0.484174	0.600056	0.419725	0.591538
cg01803461	NA	NA	chr16	86604522	86604523	CGI	CGI	FALSE	FALSE	TRUE	0.683088	2.81249	0.608225	0.849326
cg01806859	100616308	MIR4666A	chr1	228649442	228649443	CGI-S-Shore	CGI-Shore	TRUE	FALSE	FALSE	1.29268	2.79717	0.698229	0.86833
cg01807026	1955	MEGF9	chr9	123475367	123475368	CGI-N-Shore	CGI-Shore	FALSE	TRUE	FALSE	1.11985	2.27716	0.662032	0.80173
cg01807131	NA	NA	chr7	73856280	73856281	Non-CGI	Non-CGI	FALSE	FALSE	TRUE	-1.58042	0.163449	0.256199	0.527005
cg01810111	NA	NA	chr6	27637395	27637396	CGI	CGI	FALSE	FALSE	TRUE	-1.76577	-0.227725	0.230119	0.462704
cg01812146	9411	ARHGAP29	chr1	94704178	94704179	CGI-S-Shore	CGI-Shore	TRUE	TRUE	FALSE	0.141699	1.10203	0.520796	0.658652
cg01815090	4151	MB	chr22	36013708	36013709	Non-CGI	Non-CGI	TRUE	TRUE	FALSE	1.74858	2.91222	0.763063	0.868118
cg01815263	9695	EDEM1	chr3	5237478	5237479	Non-CGI	Non-CGI	FALSE	TRUE	FALSE	-2.20205	-1.16896	0.184818	0.321559
cg01816768	79827	CLMP	chr11	123063169	123063170	CGI-N-Shelf	CGI-Shelf	FALSE	TRUE	FALSE	1.00193	1.71282	0.657779	0.758386
cg01821088	114818	KLHL29	chr2	23832010	23832011	Non-CGI	Non-CGI	FALSE	TRUE	FALSE	2.13704	3.26962	0.808439	0.900873
cg01823958	6512	SLC1A7	chr1	53557455	53557456	CGI-N-Shore	CGI-Shore	TRUE	TRUE	FALSE	-0.843299	1.35464	0.359886	0.697767
cg01824625	2042	EPHA3	chr3	89229763	89229764	Non-CGI	Non-CGI	FALSE	TRUE	FALSE	-0.0837903	1.24028	0.485907	0.678674
cg01825137	NA	NA	chr3	104574746	104574747	Non-CGI	Non-CGI	FALSE	FALSE	TRUE	-0.196405	0.952702	0.471039	0.652224
cg01827761	127707	KLHDC7A	chr1	18806854	18806855	CGI-N-Shore	CGI-Shore	TRUE	FALSE	FALSE	-1.9272	-1.18429	0.211579	0.317555
cg01827818	160777	CCDC60	chr12	119771596	119771597	CGI-N-Shore	CGI-Shore	TRUE	FALSE	FALSE	-0.663786	0.341368	0.390167	0.556576
cg01827999	146691	TOM1L2	chr17	17791914	17791915	Non-CGI	Non-CGI	FALSE	TRUE	FALSE	-1.84885	-1.0696	0.218884	0.333145
cg01828548	127534	GJB4	chr1	35226135	35226136	CGI-N-Shore	CGI-Shore	TRUE	TRUE	FALSE	-1.88298	-0.166948	0.218801	0.471304
cg01829817	NA	NA	chr16	86774519	86774520	CGI	CGI	FALSE	FALSE	TRUE	-0.632496	1.10537	0.393565	0.674581
cg01831657	91522	COL23A1	chr5	178014589	178014590	CGI-N-Shore	CGI-Shore	FALSE	TRUE	FALSE	1.68213	2.73188	0.749015	0.866646
cg01832294	283383	GPR133	chr12	131535503	131535504	CGI	CGI	FALSE	TRUE	FALSE	2.00426	2.68407	0.797294	0.858955
cg01832935	NA	NA	chr16	51026724	51026725	CGI-N-Shore	CGI-Shore	FALSE	FALSE	TRUE	-0.136398	1.2897	0.474449	0.691737
cg01833057	60312	AFAP1	chr4	7893062	7893063	Non-CGI	Non-CGI	FALSE	TRUE	FALSE	-1.31829	0.0198813	0.288993	0.50456
cg01833470	NA	NA	chr1	36270210	36270211	CGI-N-Shelf	CGI-Shelf	FALSE	FALSE	TRUE	1.66413	2.98727	0.753719	0.880744
cg01834541	5195	PEX14	chr1	10651801	10651802	Non-CGI	Non-CGI	FALSE	TRUE	FALSE	2.71098	3.56829	0.861045	0.916246
cg01834856	NA	NA	chr7	99639091	99639092	Non-CGI	Non-CGI	FALSE	FALSE	TRUE	-1.19415	2.18968	0.307981	0.784877
cg01834979	116986	AGAP2	chr12	58119918	58119919	CGI-N-Shore	CGI-Shore	TRUE	TRUE	FALSE	-2.61665	-1.84673	0.141331	0.231333
cg01834979	100130776	AGAP2-AS1	chr12	58119918	58119919	CGI-N-Shore	CGI-Shore	TRUE	TRUE	FALSE	-2.61665	-1.84673	0.141331	0.231333
cg01836724	NA	NA	chr5	83196022	83196023	Non-CGI	Non-CGI	FALSE	FALSE	TRUE	1.69743	3.70591	0.757188	0.924116
cg01839898	5522	PPP2R2C	chr4	6465329	6465330	Non-CGI	Non-CGI	FALSE	TRUE	FALSE	-0.509995	0.526337	0.420933	0.585603
cg01839993	54541	DDIT4	chr10	74034644	74034645	CGI	CGI	TRUE	TRUE	FALSE	-2.41351	-1.80198	0.159253	0.231526
cg01842837	9612	NCOR2	chr12	125040237	125040238	Non-CGI	Non-CGI	FALSE	TRUE	FALSE	0.275804	1.33561	0.546119	0.699705
cg01845356	1814	DRD3	chr3	113898568	113898569	Non-CGI	Non-CGI	TRUE	TRUE	FALSE	-0.596603	0.809002	0.401392	0.616424
cg01845501	NA	NA	chr5	31619428	31619429	Non-CGI	Non-CGI	FALSE	FALSE	TRUE	1.83639	2.4786	0.775572	0.840553
cg01847441	87	ACTN1	chr14	69431073	69431074	Non-CGI	Non-CGI	FALSE	TRUE	FALSE	2.29588	3.15081	0.824467	0.89159
cg01849093	NA	NA	chr11	110876141	110876142	Non-CGI	Non-CGI	FALSE	FALSE	TRUE	-0.500041	1.12155	0.415898	0.67375
cg01849903	NA	NA	chr3	127263647	127263648	CGI-N-Shelf	CGI-Shelf	FALSE	FALSE	TRUE	0.558996	1.35695	0.586666	0.713178
cg01854776	23677	SH3BP4	chr2	235904366	235904367	CGI	CGI	TRUE	TRUE	FALSE	0.0724324	3.07454	0.511926	0.876375
cg01856145	6314	ATXN7	chr3	63952230	63952231	Non-CGI	Non-CGI	TRUE	TRUE	FALSE	-0.179947	2.42262	0.469364	0.815348
cg01857838	NA	NA	chr6	166108110	166108111	Non-CGI	Non-CGI	FALSE	FALSE	TRUE	1.53171	2.45069	0.728657	0.834837
cg01859228	23604	DAPK2	chr15	64208452	64208453	Non-CGI	Non-CGI	FALSE	TRUE	FALSE	-0.69258	0.00145515	0.384333	0.496292
cg01860063	7903	ST8SIA4	chr5	100237986	100237987	CGI-S-Shore	CGI-Shore	FALSE	TRUE	FALSE	-1.52135	-0.660229	0.259911	0.390516
cg01860378	84929	FIBCD1	chr9	133792985	133792986	CGI-S-Shore	CGI-Shore	FALSE	TRUE	FALSE	1.12667	1.93645	0.676226	0.784186
cg01860763	401237	CASC15	chr6	21781118	21781119	Non-CGI	Non-CGI	FALSE	TRUE	FALSE	0.583842	2.04744	0.596599	0.794486
cg01860944	NA	NA	chr13	61455634	61455635	Non-CGI	Non-CGI	FALSE	FALSE	TRUE	-0.979001	0.20391	0.340502	0.534305
cg01861019	NA	NA	chr11	127547963	127547964	Non-CGI	Non-CGI	FALSE	FALSE	TRUE	2.05249	2.76187	0.800116	0.866864
cg01861042	NA	NA	chr6	169316756	169316757	Non-CGI	Non-CGI	FALSE	FALSE	TRUE	0.386394	1.62723	0.564159	0.73334
cg01861377	8612	PPAP2C	chr19	281445	281446	Non-CGI	Non-CGI	FALSE	TRUE	FALSE	-0.891054	0.110407	0.355049	0.519078
cg01861634	375616	KCP	chr7	128530369	128530370	CGI-N-Shore	CGI-Shore	FALSE	TRUE	FALSE	2.88723	3.59818	0.877296	0.920807
cg01863042	NA	NA	chr13	23309892	23309893	CGI	CGI	FALSE	FALSE	TRUE	0.378704	1.69123	0.569029	0.731665
cg01863290	623	BDKRB1	chr14	96730669	96730670	CGI	CGI	TRUE	TRUE	FALSE	3.51561	4.22078	0.91415	0.947181
cg01863964	29091	STXBP6	chr14	25512111	25512112	Non-CGI	Non-CGI	FALSE	TRUE	FALSE	1.22016	2.72218	0.683774	0.84182
cg01864825	54491	FAM105A	chr5	14585625	14585626	CGI-S-Shelf	CGI-Shelf	FALSE	TRUE	FALSE	1.05847	1.68414	0.67079	0.758156
cg01866359	389941	C1QL3	chr10	16564102	16564103	CGI-S-Shore	CGI-Shore	TRUE	FALSE	FALSE	0.925633	1.86014	0.647749	0.777534
cg01866770	8911	CACNA1I	chr22	40079107	40079108	CGI-S-Shelf	CGI-Shelf	FALSE	TRUE	FALSE	1.37236	2.1056	0.717316	0.806057
cg01868791	NA	NA	chr7	158749591	158749592	CGI-S-Shore	CGI-Shore	FALSE	FALSE	TRUE	0.48262	1.99609	0.580845	0.786813
cg01869342	93627	TBCK	chr4	106983673	106983674	Non-CGI	Non-CGI	FALSE	TRUE	FALSE	-0.198064	1.58089	0.466692	0.728828
cg01870834	5339	PLEC	chr8	145002835	145002836	CGI-S-Shore	CGI-Shore	FALSE	TRUE	FALSE	-0.429713	0.625414	0.428363	0.604931
cg01873886	652	BMP4	chr14	54419825	54419826	CGI	CGI	FALSE	TRUE	FALSE	-3.12654	-2.06431	0.103969	0.212223
cg01877084	4807	NHLH1	chr1	160341106	160341107	CGI-S-Shore	CGI-Shore	FALSE	TRUE	FALSE	-1.2349	-0.311177	0.300517	0.447484
cg01880463	128506	OCSTAMP	chr20	45179413	45179414	Non-CGI	Non-CGI	TRUE	FALSE	FALSE	-2.00803	-0.936758	0.204702	0.358111
cg01881182	18	ABAT	chr16	8806531	8806532	CGI-N-Shore	CGI-Shore	TRUE	TRUE	FALSE	-0.730795	0.367676	0.383383	0.560807
cg01882058	NA	NA	chr16	86465884	86465885	CGI-N-Shore	CGI-Shore	FALSE	FALSE	TRUE	-0.245249	1.10844	0.463778	0.677897
cg01882535	NA	NA	chr11	56643145	56643146	Non-CGI	Non-CGI	FALSE	TRUE	FALSE	1.36337	2.57142	0.717614	0.851319
cg01882880	100874362	HOXB-AS1	chr17	46623819	46623820	CGI-S-Shore	CGI-Shore	TRUE	FALSE	FALSE	0.0417602	2.15932	0.507205	0.803185
cg01882880	3212	HOXB2	chr17	46623819	46623820	CGI-S-Shore	CGI-Shore	TRUE	FALSE	FALSE	0.0417602	2.15932	0.507205	0.803185
cg01883408	645121	CCNI2	chr5	132083691	132083692	CGI	CGI	FALSE	TRUE	FALSE	-0.0209283	0.645055	0.496567	0.602046
cg01885839	9315	NREP	chr5	111017556	111017557	Non-CGI	Non-CGI	FALSE	TRUE	FALSE	-0.754802	1.41654	0.373321	0.711115
cg01885839	100505678	STARD4-AS1	chr5	111017556	111017557	Non-CGI	Non-CGI	FALSE	TRUE	FALSE	-0.754802	1.41654	0.373321	0.711115
cg01889025	6397	SEC14L1	chr17	75093989	75093990	Non-CGI	Non-CGI	FALSE	TRUE	FALSE	1.47774	2.15741	0.730527	0.800987
cg01889025	654434	LINC00338	chr17	75093989	75093990	Non-CGI	Non-CGI	FALSE	TRUE	FALSE	1.47774	2.15741	0.730527	0.800987
cg01889083	NA	NA	chr3	36803565	36803566	CGI-N-Shore	CGI-Shore	FALSE	FALSE	TRUE	2.64814	3.43244	0.858741	0.908969
cg01889461	404744	NPSR1-AS1	chr7	34606530	34606531	Non-CGI	Non-CGI	FALSE	TRUE	FALSE	0.350601	0.980591	0.559212	0.658279
cg01889893	54206	ERRFI1	chr1	8085193	8085194	CGI-N-Shore	CGI-Shore	FALSE	TRUE	FALSE	-1.84365	-1.13644	0.227603	0.321483
cg01890568	40	ASIC2	chr17	31437649	31437650	Non-CGI	Non-CGI	FALSE	TRUE	FALSE	0.740463	2.08512	0.621481	0.791392
cg01890836	23164	MPRIP	chr17	17055584	17055585	Non-CGI	Non-CGI	FALSE	TRUE	FALSE	-2.64144	-1.75401	0.139737	0.252192
cg01891736	9516	LITAF	chr16	11655159	11655160	Non-CGI	Non-CGI	FALSE	TRUE	FALSE	-0.772497	2.18015	0.378585	0.781566
cg01894498	5583	PRKCH	chr14	61655848	61655849	Non-CGI	Non-CGI	FALSE	TRUE	FALSE	-0.814891	0.651245	0.372056	0.597227
cg01898553	26053	AUTS2	chr7	70252953	70252954	CGI-S-Shore	CGI-Shore	FALSE	TRUE	FALSE	0.693766	2.7972	0.613046	0.846872
cg01899676	100287944	LOC100287944	chr12	106988413	106988414	Non-CGI	Non-CGI	FALSE	TRUE	FALSE	-2.11282	-0.971566	0.188748	0.350003
cg01899676	5992	RFX4	chr12	106988413	106988414	Non-CGI	Non-CGI	FALSE	TRUE	FALSE	-2.11282	-0.971566	0.188748	0.350003
cg01901022	NA	NA	chr13	112874796	112874797	CGI	CGI	FALSE	FALSE	TRUE	0.229511	1.78132	0.539283	0.759847
cg01901262	10265	IRX5	chr16	54966837	54966838	CGI	CGI	FALSE	TRUE	FALSE	-0.618284	1.34796	0.404318	0.711995
cg01902845	5629	PROX1	chr1	214170993	214170994	CGI	CGI	FALSE	TRUE	FALSE	1.65799	2.37808	0.754733	0.830038
cg01903374	79626	TNFAIP8L2	chr1	151129844	151129845	Non-CGI	Non-CGI	TRUE	TRUE	FALSE	0.834021	3.23201	0.635759	0.885634
cg01903374	100534012	TNFAIP8L2-SCNM1	chr1	151129844	151129845	Non-CGI	Non-CGI	TRUE	TRUE	FALSE	0.834021	3.23201	0.635759	0.885634
cg01904243	91748	ELMSAN1	chr14	74251254	74251255	CGI-N-Shore	CGI-Shore	FALSE	TRUE	FALSE	-0.186489	0.481628	0.468347	0.578007
cg01904978	NA	NA	chr11	85847072	85847073	Non-CGI	Non-CGI	FALSE	FALSE	TRUE	1.81366	2.87816	0.769421	0.873715
cg01905090	NA	NA	chr1	101023062	101023063	Non-CGI	Non-CGI	FALSE	FALSE	TRUE	-1.33131	1.52465	0.287813	0.71358
cg01907071	79875	THSD4	chr15	71606395	71606396	Non-CGI	Non-CGI	FALSE	TRUE	FALSE	0.654154	2.4689	0.603726	0.829268
cg01907098	8566	PDXK	chr21	45149141	45149142	CGI	CGI	FALSE	TRUE	FALSE	-1.06993	-0.0677318	0.328062	0.490525
cg01909364	4222	MEOX1	chr17	41739926	41739927	Non-CGI	Non-CGI	TRUE	FALSE	FALSE	0.164338	1.36492	0.527563	0.704706
cg01912119	NA	NA	chr5	90471712	90471713	Non-CGI	Non-CGI	FALSE	FALSE	TRUE	-0.207359	1.90015	0.464154	0.758782
cg01913259	2558	GABRA5	chr15	27189193	27189194	Non-CGI	Non-CGI	TRUE	TRUE	FALSE	-1.37001	0.0182452	0.284494	0.506452
cg01913455	6909	TBX2	chr17	59479070	59479071	CGI	CGI	TRUE	TRUE	FALSE	0.501714	1.7279	0.575836	0.752607
cg01916237	NA	NA	chr4	1558883	1558884	CGI-S-Shore	CGI-Shore	FALSE	FALSE	TRUE	0.138871	1.3114	0.522864	0.707953
cg01916400	6444	SGCD	chr5	155548458	155548459	Non-CGI	Non-CGI	FALSE	TRUE	FALSE	-1.91054	-0.617861	0.213057	0.399546
cg01916632	57107	PDSS2	chr6	107781506	107781507	CGI	CGI	TRUE	FALSE	FALSE	1.1085	2.20348	0.679474	0.807166
cg01916918	1191	CLU	chr8	27461199	27461200	CGI-N-Shore	CGI-Shore	FALSE	TRUE	FALSE	1.0081	2.17215	0.664151	0.80519
cg01917721	286053	NSMCE2	chr8	126195405	126195406	Non-CGI	Non-CGI	FALSE	TRUE	FALSE	1.94736	3.03663	0.78353	0.888376
cg01919885	6002	RGS12	chr4	3365330	3365331	CGI	CGI	FALSE	TRUE	FALSE	1.19436	2.73643	0.677747	0.860146
cg01919939	100507466	DPH6-AS1	chr15	35990007	35990008	Non-CGI	Non-CGI	FALSE	TRUE	FALSE	-0.237194	0.814383	0.461409	0.63017
cg01921382	348932	SLC6A18	chr5	1241848	1241849	CGI	CGI	FALSE	TRUE	FALSE	0.634738	1.61288	0.607515	0.744049
cg01923724	1600	DAB1	chr1	58864209	58864210	Non-CGI	Non-CGI	FALSE	TRUE	FALSE	2.0761	3.4163	0.79985	0.908428
cg01923999	157638	FAM84B	chr8	127568677	127568678	CGI-N-Shore	CGI-Shore	FALSE	TRUE	FALSE	-2.33473	-1.2719	0.167882	0.305951
cg01924952	NA	NA	chr2	8627933	8627934	Non-CGI	Non-CGI	FALSE	FALSE	TRUE	-1.96298	0.691632	0.206724	0.603643
cg01925521	1363	CPE	chr4	166299123	166299124	CGI-N-Shore	CGI-Shore	TRUE	FALSE	FALSE	0.371379	2.08735	0.561798	0.792622
cg01929314	NA	NA	chr4	84629827	84629828	Non-CGI	Non-CGI	FALSE	FALSE	TRUE	0.822368	2.50985	0.631932	0.832533
cg01929699	100302239	MIR548F5	chr13	36491531	36491532	Non-CGI	Non-CGI	FALSE	TRUE	FALSE	-1.01661	2.63844	0.335782	0.822838
cg01929699	9201	DCLK1	chr13	36491531	36491532	Non-CGI	Non-CGI	FALSE	TRUE	FALSE	-1.01661	2.63844	0.335782	0.822838
cg01931028	10296	MAEA	chr4	1287888	1287889	CGI-S-Shelf	CGI-Shelf	FALSE	TRUE	FALSE	-1.21239	0.566253	0.305963	0.588813
cg01932182	78989	COLEC11	chr2	3689368	3689369	CGI	CGI	FALSE	TRUE	FALSE	-0.174644	1.45017	0.471471	0.716783
cg01933079	375449	MAST4	chr5	65929713	65929714	Non-CGI	Non-CGI	FALSE	TRUE	FALSE	0.6178	1.69193	0.602857	0.754259
cg01933318	NA	NA	chr4	14864128	14864129	CGI-N-Shore	CGI-Shore	FALSE	TRUE	FALSE	0.509284	1.33916	0.583684	0.70015
cg01933519	54741	LEPROT	chr1	65891704	65891705	Non-CGI	Non-CGI	FALSE	TRUE	FALSE	-2.02458	-0.938074	0.198694	0.350149
cg01933519	3953	LEPR	chr1	65891704	65891705	Non-CGI	Non-CGI	FALSE	TRUE	FALSE	-2.02458	-0.938074	0.198694	0.350149
cg01936220	NA	NA	chr13	114906016	114906017	CGI	CGI	FALSE	FALSE	TRUE	1.48627	2.46781	0.725965	0.828855
cg01936287	10110	SGK2	chr20	42194581	42194582	Non-CGI	Non-CGI	TRUE	TRUE	FALSE	0.404377	1.03958	0.568106	0.669083
cg01936649	NA	NA	chr6	164062746	164062747	CGI-S-Shore	CGI-Shore	FALSE	FALSE	TRUE	1.288	3.10605	0.700349	0.889855
cg01940657	9159	PCSK7	chr11	117089445	117089446	Non-CGI	Non-CGI	FALSE	TRUE	FALSE	-1.40368	0.11198	0.275518	0.519381
cg01940753	NA	NA	chr15	81069622	81069623	CGI-N-Shore	CGI-Shore	FALSE	FALSE	TRUE	-2.40556	0.333712	0.166394	0.555341
cg01941586	10450	PPIE	chr1	40203715	40203716	CGI-N-Shore	CGI-Shore	TRUE	FALSE	FALSE	-0.823486	1.36534	0.369378	0.691318
cg01942372	3987	LIMS1	chr2	109203501	109203502	Non-CGI	Non-CGI	TRUE	TRUE	FALSE	1.9801	2.67144	0.793397	0.857281
cg01944370	2771	GNAI2	chr3	50286969	50286970	Non-CGI	Non-CGI	TRUE	TRUE	FALSE	0.419399	1.92428	0.571545	0.785318
cg01945641	285548	LOC285548	chr4	13550574	13550575	CGI	CGI	TRUE	FALSE	FALSE	-1.14842	-0.400423	0.318159	0.436228
cg01945840	4151	MB	chr22	36013675	36013676	Non-CGI	Non-CGI	TRUE	TRUE	FALSE	1.00132	2.90114	0.659547	0.859141
cg01946401	8464	SUPT3H	chr6	45296101	45296102	Non-CGI	Non-CGI	TRUE	TRUE	FALSE	-1.77494	-0.0154423	0.229715	0.493549
cg01946401	860	RUNX2	chr6	45296101	45296102	Non-CGI	Non-CGI	TRUE	TRUE	FALSE	-1.77494	-0.0154423	0.229715	0.493549
cg01947732	26064	RAI14	chr5	34718664	34718665	Non-CGI	Non-CGI	FALSE	TRUE	FALSE	2.37653	3.47801	0.829453	0.916329
cg01948217	671	BPI	chr20	36932385	36932386	Non-CGI	Non-CGI	TRUE	FALSE	FALSE	0.481286	2.87633	0.581288	0.862371
cg01948850	9686	VGLL4	chr3	11651536	11651537	CGI	CGI	FALSE	TRUE	FALSE	-1.71	-0.644831	0.239685	0.403402
cg01950495	11076	TPPP	chr5	664559	664560	CGI	CGI	FALSE	TRUE	FALSE	1.82953	2.95766	0.773025	0.874769
cg01952913	NA	NA	chr8	1094904	1094905	CGI	CGI	FALSE	FALSE	TRUE	-1.06131	1.64764	0.333096	0.741422
cg01953658	NA	NA	chr15	96904404	96904405	CGI	CGI	FALSE	FALSE	TRUE	-0.120564	1.27443	0.476828	0.691005
cg01954305	NA	NA	chr8	135817117	135817118	Non-CGI	Non-CGI	FALSE	FALSE	TRUE	-1.4099	1.62957	0.277597	0.724862
cg01954567	NA	NA	chr6	32362318	32362319	Non-CGI	Non-CGI	FALSE	FALSE	TRUE	1.26425	1.93585	0.697	0.786488
cg01955203	114907	FBXO32	chr8	124515502	124515503	Non-CGI	Non-CGI	FALSE	TRUE	FALSE	1.43151	3.01627	0.719404	0.880696
cg01959025	NA	NA	chr15	93749169	93749170	Non-CGI	Non-CGI	FALSE	FALSE	TRUE	2.31551	3.47547	0.822926	0.915486
cg01963754	121793	TEX29	chr13	111977248	111977249	CGI	CGI	FALSE	TRUE	FALSE	-0.0441503	1.72888	0.491645	0.753026
cg01964039	50863	NTM	chr11	131239703	131239704	CGI-N-Shore	CGI-Shore	TRUE	FALSE	FALSE	1.44286	2.06422	0.723816	0.802132
cg01964852	3200	HOXA3	chr7	27146262	27146263	CGI	CGI	FALSE	TRUE	FALSE	0.348273	2.63324	0.552304	0.847124
cg01965939	79628	SH3TC2	chr5	148442694	148442695	Non-CGI	Non-CGI	TRUE	FALSE	FALSE	-1.26048	-0.442865	0.300487	0.428327
cg01966129	23532	PRAME	chr22	22901880	22901881	CGI-S-Shore	CGI-Shore	TRUE	TRUE	FALSE	1.58596	2.21356	0.74716	0.804531
cg01966129	648691	LOC648691	chr22	22901880	22901881	CGI-S-Shore	CGI-Shore	TRUE	TRUE	FALSE	1.58596	2.21356	0.74716	0.804531
cg01966459	NA	NA	chr8	103597179	103597180	Non-CGI	Non-CGI	FALSE	FALSE	TRUE	1.02453	3.077	0.668147	0.868494
cg01966891	400456	LOC400456	chr15	95870990	95870991	CGI-S-Shore	CGI-Shore	TRUE	FALSE	FALSE	0.8565	1.71677	0.639256	0.750133
cg01966922	1740	DLG2	chr11	84028562	84028563	Non-CGI	Non-CGI	TRUE	TRUE	FALSE	0.699183	1.93079	0.603466	0.761319
cg01967399	9464	HAND2	chr4	174448084	174448085	CGI	CGI	FALSE	TRUE	FALSE	0.609672	2.27296	0.602304	0.813407
cg01970904	9874	TLK1	chr2	172014013	172014014	CGI-N-Shore	CGI-Shore	FALSE	TRUE	FALSE	2.59736	3.24037	0.84989	0.898728
cg01971258	NA	NA	chr3	22732998	22732999	Non-CGI	Non-CGI	FALSE	FALSE	TRUE	0.992798	1.70399	0.661007	0.760438
cg01973181	80212	CCDC92	chr12	124436804	124436805	CGI-S-Shore	CGI-Shore	FALSE	TRUE	FALSE	1.66007	3.66934	0.743292	0.922421
cg01973456	NA	NA	chr13	114918702	114918703	CGI	CGI	FALSE	FALSE	TRUE	-1.40916	-0.245681	0.27611	0.459661
cg01973908	NA	NA	chr7	131628768	131628769	CGI-N-Shore	CGI-Shore	FALSE	FALSE	TRUE	2.5612	3.30703	0.846355	0.903972
cg01974817	NA	NA	chr1	29802252	29802253	CGI-N-Shelf	CGI-Shelf	FALSE	FALSE	TRUE	1.11444	2.21903	0.67643	0.817634
cg01976303	29123	ANKRD11	chr16	89393185	89393186	CGI-N-Shore	CGI-Shore	FALSE	TRUE	FALSE	1.2827	3.33011	0.70626	0.894075
cg01977582	863	CBFA2T3	chr16	88976280	88976281	CGI	CGI	FALSE	TRUE	FALSE	-0.850973	1.14374	0.363744	0.668739
cg01978368	79363	RSG1	chr1	16563189	16563190	CGI-N-Shore	CGI-Shore	TRUE	FALSE	FALSE	-2.64617	-1.88744	0.139249	0.224191
cg01978937	57593	EBF4	chr20	2671574	2671575	CGI-N-Shore	CGI-Shore	TRUE	FALSE	FALSE	2.30324	3.03732	0.825026	0.887494
cg01980222	54209	TREM2	chr6	41130917	41130918	Non-CGI	Non-CGI	TRUE	FALSE	FALSE	-1.85517	-0.115468	0.21989	0.481155
cg01982170	440952	EIF1B-AS1	chr3	40301346	40301347	Non-CGI	Non-CGI	FALSE	TRUE	FALSE	0.411216	2.09386	0.570019	0.795076
cg01982170	25924	MYRIP	chr3	40301346	40301347	Non-CGI	Non-CGI	FALSE	TRUE	FALSE	0.411216	2.09386	0.570019	0.795076
cg01982835	22839	DLGAP4	chr20	34995278	34995279	Non-CGI	Non-CGI	TRUE	TRUE	FALSE	-2.01267	0.189934	0.20382	0.535622
cg01983248	64417	C5orf28	chr5	43482804	43482805	CGI-N-Shore	CGI-Shore	FALSE	TRUE	FALSE	-1.23566	-0.0471222	0.303412	0.49341
cg01986016	3216	HOXB6	chr17	46681154	46681155	CGI	CGI	FALSE	TRUE	FALSE	-2.32529	-1.41499	0.175713	0.285234
cg01986016	404266	HOXB-AS3	chr17	46681154	46681155	CGI	CGI	FALSE	TRUE	FALSE	-2.32529	-1.41499	0.175713	0.285234
cg01986630	79068	FTO	chr16	53946263	53946264	Non-CGI	Non-CGI	FALSE	TRUE	FALSE	2.68303	3.48323	0.861662	0.914511
cg01987353	NA	NA	chr17	32569640	32569641	Non-CGI	Non-CGI	FALSE	FALSE	TRUE	-1.54507	-0.767809	0.258405	0.375573
cg01988891	53831	GPR84	chr12	54758384	54758385	Non-CGI	Non-CGI	TRUE	FALSE	FALSE	-0.192501	1.81563	0.467232	0.76014
cg01990695	3834	KIF25	chr6	168416740	168416741	CGI-N-Shore	CGI-Shore	TRUE	TRUE	FALSE	-3.45675	-1.28193	0.0871709	0.317843
cg01991752	57596	BEGAIN	chr14	101014148	101014149	CGI-S-Shore	CGI-Shore	TRUE	TRUE	FALSE	-1.72186	1.02429	0.23825	0.665438
cg01991967	3557	IL1RN	chr2	113884734	113884735	Non-CGI	Non-CGI	TRUE	TRUE	FALSE	2.01527	2.90955	0.795351	0.878738
cg01992382	7148	TNXB	chr6	32064212	32064213	CGI	CGI	FALSE	TRUE	FALSE	-1.83745	2.64611	0.236644	0.822384
cg01992684	23367	LARP1	chr5	154147579	154147580	Non-CGI	Non-CGI	FALSE	TRUE	FALSE	2.17771	2.94208	0.809051	0.880746
cg01994243	NA	NA	chr4	59081902	59081903	Non-CGI	Non-CGI	FALSE	FALSE	TRUE	-0.283526	1.39037	0.45612	0.709484
cg01999046	7186	TRAF2	chr9	139779708	139779709	CGI-N-Shore	CGI-Shore	TRUE	TRUE	FALSE	0.894939	2.61864	0.63751	0.84072
cg01999046	100616480	MIR4479	chr9	139779708	139779709	CGI-N-Shore	CGI-Shore	TRUE	TRUE	FALSE	0.894939	2.61864	0.63751	0.84072
cg01999051	51660	MPC1	chr6	166797738	166797739	CGI-S-Shore	CGI-Shore	TRUE	FALSE	FALSE	-1.34278	-0.0393542	0.284997	0.491242
cg01999701	NA	NA	chr3	184456165	184456166	Non-CGI	Non-CGI	FALSE	FALSE	TRUE	-2.58492	-1.84212	0.144843	0.229892
cg02000032	646329	LOC646329	chr7	130563521	130563522	Non-CGI	Non-CGI	TRUE	TRUE	FALSE	1.25394	3.11079	0.698083	0.872249
cg02000032	407024	MIR29B1	chr7	130563521	130563522	Non-CGI	Non-CGI	TRUE	TRUE	FALSE	1.25394	3.11079	0.698083	0.872249
cg02000032	407021	MIR29A	chr7	130563521	130563522	Non-CGI	Non-CGI	TRUE	TRUE	FALSE	1.25394	3.11079	0.698083	0.872249
cg02000426	NA	NA	chr8	1759815	1759816	CGI	CGI	FALSE	FALSE	TRUE	-2.61433	0.326024	0.142349	0.552171
cg02000808	3200	HOXA3	chr7	27156062	27156063	CGI-S-Shore	CGI-Shore	FALSE	TRUE	FALSE	1.58996	3.31802	0.739205	0.904266
cg02001279	1820	ARID3A	chr19	940967	940968	CGI	CGI	FALSE	TRUE	FALSE	-1.36585	0.745437	0.302169	0.62329
cg02003460	643401	LINC01021	chr5	27472542	27472543	Non-CGI	Non-CGI	TRUE	FALSE	FALSE	0.134344	0.921344	0.522767	0.652434
cg02005231	55567	DNAH3	chr16	21115843	21115844	Non-CGI	Non-CGI	FALSE	TRUE	FALSE	0.234915	1.38548	0.532324	0.708318
cg02005600	3202	HOXA5	chr7	27183686	27183687	CGI	CGI	TRUE	TRUE	FALSE	1.52551	3.49066	0.721526	0.904031
cg02005600	100133311	HOXA-AS3	chr7	27183686	27183687	CGI	CGI	TRUE	TRUE	FALSE	1.52551	3.49066	0.721526	0.904031
cg02005758	7879	RAB7A	chr3	128454730	128454731	Non-CGI	Non-CGI	FALSE	TRUE	FALSE	0.298666	1.64279	0.549554	0.745787
cg02006134	11033	ADAP1	chr7	963333	963334	CGI	CGI	FALSE	TRUE	FALSE	-0.0137991	1.10517	0.499064	0.678837
cg02009311	92659	MAFG-AS1	chr17	79886614	79886615	CGI	CGI	TRUE	TRUE	FALSE	-1.91062	-0.844992	0.218256	0.367506
cg02009311	4097	MAFG	chr17	79886614	79886615	CGI	CGI	TRUE	TRUE	FALSE	-1.91062	-0.844992	0.218256	0.367506
cg02009648	64928	MRPL14	chr6	44090983	44090984	CGI-N-Shelf	CGI-Shelf	FALSE	TRUE	FALSE	-0.443828	0.403191	0.426162	0.564765
cg02010152	6891	TAP2	chr6	32782617	32782618	Non-CGI	Non-CGI	FALSE	TRUE	FALSE	0.92081	1.98477	0.646165	0.785373
cg02010152	3112	HLA-DOB	chr6	32782617	32782618	Non-CGI	Non-CGI	FALSE	TRUE	FALSE	0.92081	1.98477	0.646165	0.785373
cg02010682	6788	STK3	chr8	99954432	99954433	CGI	CGI	FALSE	TRUE	FALSE	-2.39913	-1.60327	0.162308	0.265038
cg02010763	6095	RORA	chr15	61044829	61044830	Non-CGI	Non-CGI	FALSE	TRUE	FALSE	-2.2191	-1.423	0.178247	0.277929
cg02011430	55625	ZDHHC7	chr16	85010597	85010598	CGI-S-Shore	CGI-Shore	FALSE	TRUE	FALSE	0.323066	2.46943	0.554334	0.829317
cg02011706	NA	NA	chr16	891283	891284	CGI	CGI	FALSE	FALSE	TRUE	-0.581712	0.337351	0.409721	0.553422
cg02012159	126731	CCSAP	chr1	229477078	229477079	CGI-N-Shore	CGI-Shore	FALSE	TRUE	FALSE	0.26232	1.11126	0.543635	0.677734
cg02013781	NA	NA	chr6	11810820	11810821	Non-CGI	Non-CGI	FALSE	FALSE	TRUE	-0.508379	1.1928	0.413833	0.680449
cg02014107	1746	DLX2	chr2	172967979	172967980	CGI	CGI	TRUE	FALSE	FALSE	-2.75693	-1.86351	0.130464	0.225123
cg02014217	53834	FGFRL1	chr4	1015600	1015601	CGI-N-Shore	CGI-Shore	FALSE	TRUE	FALSE	1.78662	2.75388	0.768482	0.859253
cg02015219	10098	TSPAN5	chr4	99450728	99450729	Non-CGI	Non-CGI	FALSE	TRUE	FALSE	2.84817	3.85378	0.873843	0.93483
cg02015823	85407	NKD1	chr16	50584989	50584990	CGI-S-Shore	CGI-Shore	FALSE	TRUE	FALSE	1.43293	2.29307	0.726655	0.81854
cg02016065	152078	C3orf55	chr3	157290927	157290928	Non-CGI	Non-CGI	FALSE	TRUE	FALSE	0.637028	3.21298	0.60819	0.896348
cg02016987	8924	HERC2	chr15	28447547	28447548	CGI	CGI	TRUE	TRUE	FALSE	1.88741	2.64478	0.781827	0.849869
cg02019444	6453	ITSN1	chr21	35016787	35016788	CGI-S-Shore	CGI-Shore	FALSE	TRUE	FALSE	-2.08095	-1.26758	0.191852	0.301278
cg02019444	29980	DONSON	chr21	35016787	35016788	CGI-S-Shore	CGI-Shore	FALSE	TRUE	FALSE	-2.08095	-1.26758	0.191852	0.301278
cg02019942	11343	MGLL	chr3	127458907	127458908	Non-CGI	Non-CGI	FALSE	TRUE	FALSE	2.53772	3.2001	0.847348	0.895853
cg02021127	138429	PIP5KL1	chr9	130691409	130691410	CGI-S-Shore	CGI-Shore	TRUE	TRUE	FALSE	0.0483417	1.45539	0.508207	0.721452
cg02022375	81851	KRTAP1-1	chr17	39197721	39197722	Non-CGI	Non-CGI	TRUE	FALSE	FALSE	-1.16088	0.358076	0.317515	0.554971
cg02022491	79066	METTL16	chr17	2323612	2323613	CGI-N-Shore	CGI-Shore	FALSE	TRUE	FALSE	-0.653402	1.05615	0.391501	0.656664
cg02022733	26025	PCDHGA12	chr5	140864578	140864579	CGI	CGI	TRUE	TRUE	FALSE	1.36325	1.99198	0.716804	0.78893
cg02022733	56112	PCDHGA3	chr5	140864578	140864579	CGI	CGI	TRUE	TRUE	FALSE	1.36325	1.99198	0.716804	0.78893
cg02022733	9708	PCDHGA8	chr5	140864578	140864579	CGI	CGI	TRUE	TRUE	FALSE	1.36325	1.99198	0.716804	0.78893
cg02022733	5098	PCDHGC3	chr5	140864578	140864579	CGI	CGI	TRUE	TRUE	FALSE	1.36325	1.99198	0.716804	0.78893
cg02022733	56100	PCDHGB6	chr5	140864578	140864579	CGI	CGI	TRUE	TRUE	FALSE	1.36325	1.99198	0.716804	0.78893
cg02022733	8641	PCDHGB4	chr5	140864578	140864579	CGI	CGI	TRUE	TRUE	FALSE	1.36325	1.99198	0.716804	0.78893
cg02022733	56098	PCDHGC4	chr5	140864578	140864579	CGI	CGI	TRUE	TRUE	FALSE	1.36325	1.99198	0.716804	0.78893
cg02022733	56107	PCDHGA9	chr5	140864578	140864579	CGI	CGI	TRUE	TRUE	FALSE	1.36325	1.99198	0.716804	0.78893
cg02022733	56101	PCDHGB5	chr5	140864578	140864579	CGI	CGI	TRUE	TRUE	FALSE	1.36325	1.99198	0.716804	0.78893
cg02022733	56106	PCDHGA10	chr5	140864578	140864579	CGI	CGI	TRUE	TRUE	FALSE	1.36325	1.99198	0.716804	0.78893
cg02022733	56114	PCDHGA1	chr5	140864578	140864579	CGI	CGI	TRUE	TRUE	FALSE	1.36325	1.99198	0.716804	0.78893
cg02022733	56102	PCDHGB3	chr5	140864578	140864579	CGI	CGI	TRUE	TRUE	FALSE	1.36325	1.99198	0.716804	0.78893
cg02022733	56113	PCDHGA2	chr5	140864578	140864579	CGI	CGI	TRUE	TRUE	FALSE	1.36325	1.99198	0.716804	0.78893
cg02022733	56099	PCDHGB7	chr5	140864578	140864579	CGI	CGI	TRUE	TRUE	FALSE	1.36325	1.99198	0.716804	0.78893
cg02022733	56111	PCDHGA4	chr5	140864578	140864579	CGI	CGI	TRUE	TRUE	FALSE	1.36325	1.99198	0.716804	0.78893
cg02022733	56105	PCDHGA11	chr5	140864578	140864579	CGI	CGI	TRUE	TRUE	FALSE	1.36325	1.99198	0.716804	0.78893
cg02022733	56110	PCDHGA5	chr5	140864578	140864579	CGI	CGI	TRUE	TRUE	FALSE	1.36325	1.99198	0.716804	0.78893
cg02022733	56104	PCDHGB1	chr5	140864578	140864579	CGI	CGI	TRUE	TRUE	FALSE	1.36325	1.99198	0.716804	0.78893
cg02022733	56108	PCDHGA7	chr5	140864578	140864579	CGI	CGI	TRUE	TRUE	FALSE	1.36325	1.99198	0.716804	0.78893
cg02022733	56109	PCDHGA6	chr5	140864578	140864579	CGI	CGI	TRUE	TRUE	FALSE	1.36325	1.99198	0.716804	0.78893
cg02022733	56103	PCDHGB2	chr5	140864578	140864579	CGI	CGI	TRUE	TRUE	FALSE	1.36325	1.99198	0.716804	0.78893
cg02023138	51411	BIN2	chr12	51701979	51701980	Non-CGI	Non-CGI	FALSE	TRUE	FALSE	-2.13701	-0.512109	0.198832	0.425374
cg02025270	84941	HSH2D	chr19	16250654	16250655	Non-CGI	Non-CGI	TRUE	TRUE	FALSE	-0.054357	1.7254	0.490031	0.748632
cg02026049	10458	BAIAP2	chr17	79049229	79049230	CGI-S-Shore	CGI-Shore	FALSE	TRUE	FALSE	-0.0576949	2.61993	0.490204	0.829613
cg02026204	5008	OSM	chr22	30663007	30663008	CGI	CGI	TRUE	FALSE	FALSE	2.09048	3.97713	0.80237	0.934344
cg02026535	140467	ZNF358	chr19	7580217	7580218	CGI-N-Shore	CGI-Shore	TRUE	FALSE	FALSE	0.529366	2.56087	0.589707	0.827475
cg02027079	3356	HTR2A	chr13	47471705	47471706	CGI-S-Shelf	CGI-Shelf	TRUE	FALSE	FALSE	2.3318	3.28294	0.829156	0.890719
cg02031359	285676	ZNF454	chr5	178367423	178367424	CGI-N-Shore	CGI-Shore	TRUE	FALSE	FALSE	-1.32751	-0.648214	0.293196	0.394748
cg02032558	NA	NA	chr4	155662438	155662439	CGI	CGI	FALSE	TRUE	FALSE	-0.490892	0.209215	0.418316	0.535113
cg02035605	81029	WNT5B	chr12	1725867	1725868	Non-CGI	Non-CGI	TRUE	TRUE	FALSE	1.02221	2.47788	0.664455	0.825136
cg02036494	286207	C9orf117	chr9	130467986	130467987	Non-CGI	Non-CGI	TRUE	TRUE	FALSE	0.964321	2.10469	0.656296	0.804026
cg02039987	2820	GPD2	chr2	157291262	157291263	CGI-N-Shore	CGI-Shore	TRUE	FALSE	FALSE	-1.95367	-0.637491	0.207562	0.396394
cg02041593	54437	SEMA5B	chr3	122741233	122741234	CGI-N-Shelf	CGI-Shelf	FALSE	TRUE	FALSE	2.54081	3.79908	0.843712	0.928167
cg02043329	22862	FNDC3A	chr13	49740771	49740772	Non-CGI	Non-CGI	FALSE	TRUE	FALSE	-0.0471446	2.75177	0.493783	0.854264
cg02045669	5783	PTPN13	chr4	87514906	87514907	CGI-N-Shore	CGI-Shore	TRUE	TRUE	FALSE	-2.22841	-0.773837	0.177636	0.382597
cg02045669	5602	MAPK10	chr4	87514906	87514907	CGI-N-Shore	CGI-Shore	TRUE	TRUE	FALSE	-2.22841	-0.773837	0.177636	0.382597
cg02046475	55140	ELP3	chr8	28047708	28047709	Non-CGI	Non-CGI	FALSE	TRUE	FALSE	2.56389	3.4908	0.849529	0.898304
cg02048220	145567	TTC7B	chr14	91141833	91141834	Non-CGI	Non-CGI	FALSE	TRUE	FALSE	-1.29987	0.343138	0.295529	0.545066
cg02050028	23072	HECW1	chr7	43156037	43156038	CGI-S-Shelf	CGI-Shelf	TRUE	TRUE	FALSE	1.47511	2.19436	0.726957	0.809275
cg02052933	9770	RASSF2	chr20	4795864	4795865	Non-CGI	Non-CGI	TRUE	TRUE	FALSE	2.14408	2.9561	0.809875	0.88347
cg02052956	140685	ZBTB46	chr20	62455321	62455322	CGI-S-Shore	CGI-Shore	FALSE	TRUE	FALSE	-1.37036	-0.415147	0.282914	0.431568
cg02053092	254394	MCM9	chr6	119220428	119220429	CGI-S-Shelf	CGI-Shelf	FALSE	TRUE	FALSE	1.69874	2.98589	0.754428	0.871569
cg02053092	25842	ASF1A	chr6	119220428	119220429	CGI-S-Shelf	CGI-Shelf	FALSE	TRUE	FALSE	1.69874	2.98589	0.754428	0.871569
cg02054252	91010	FMNL3	chr12	50078554	50078555	Non-CGI	Non-CGI	FALSE	TRUE	FALSE	-0.0732835	1.04969	0.486445	0.648206
cg02057013	392617	ELFN1	chr7	1778923	1778924	CGI	CGI	FALSE	TRUE	FALSE	1.71413	2.87281	0.751489	0.86428
cg02057681	10752	CHL1	chr3	285234	285235	Non-CGI	Non-CGI	FALSE	TRUE	FALSE	-0.932327	-0.146958	0.346528	0.471596
cg02058215	1600	DAB1	chr1	58126625	58126626	Non-CGI	Non-CGI	FALSE	TRUE	FALSE	0.790809	1.48487	0.630158	0.732464
cg02059055	255488	RNF144B	chr6	18390303	18390304	CGI-S-Shelf	CGI-Shelf	FALSE	TRUE	FALSE	0.749074	2.21873	0.621703	0.816355
cg02059315	NA	NA	chr16	3989432	3989433	CGI	CGI	FALSE	FALSE	TRUE	-2.87998	-1.08881	0.120167	0.326884
cg02059867	51195	RAPGEFL1	chr17	38334623	38334624	CGI	CGI	TRUE	FALSE	FALSE	2.41143	3.0737	0.833012	0.889717
cg02060584	287	ANK2	chr4	113970739	113970740	Non-CGI	Non-CGI	TRUE	TRUE	FALSE	-0.139191	0.792076	0.475889	0.628213
cg02061660	91137	SLC25A46	chr5	110088130	110088131	Non-CGI	Non-CGI	FALSE	TRUE	FALSE	1.70325	2.51022	0.756948	0.840444
cg02064368	NA	NA	chr4	119786577	119786578	Non-CGI	Non-CGI	FALSE	FALSE	TRUE	-2.87295	-2.25595	0.12409	0.185345
cg02067030	10085	EDIL3	chr5	83289498	83289499	Non-CGI	Non-CGI	FALSE	TRUE	FALSE	0.652751	2.52967	0.604363	0.841137
cg02067688	NA	NA	chr7	25894793	25894794	CGI	CGI	FALSE	FALSE	TRUE	-2.48642	-0.972113	0.155277	0.347901
cg02068015	27443	CECR2	chr22	17848581	17848582	CGI-N-Shore	CGI-Shore	FALSE	TRUE	FALSE	0.560284	1.23023	0.594271	0.684987
cg02068166	388125	C2CD4B	chr15	62458741	62458742	CGI-S-Shore	CGI-Shore	TRUE	FALSE	FALSE	1.47307	2.61885	0.719941	0.848188
cg02068318	8527	DGKD	chr2	234355785	234355786	CGI-S-Shore	CGI-Shore	FALSE	TRUE	FALSE	1.84934	2.53427	0.777306	0.845135
cg02068596	NA	NA	chr6	14068147	14068148	Non-CGI	Non-CGI	FALSE	FALSE	TRUE	-1.07538	-0.245769	0.325571	0.461601
cg02068832	93589	CACNA2D4	chr12	1976671	1976672	CGI-S-Shore	CGI-Shore	FALSE	TRUE	FALSE	1.26234	1.91681	0.700621	0.783226
cg02071418	NA	NA	chr4	174439060	174439061	CGI	CGI	FALSE	FALSE	TRUE	-0.019816	1.05387	0.496599	0.664604
cg02073839	3834	KIF25	chr6	168417743	168417744	CGI-S-Shore	CGI-Shore	TRUE	TRUE	FALSE	0.393973	2.74676	0.565487	0.840675
cg02074274	8566	PDXK	chr21	45178331	45178332	CGI	CGI	FALSE	TRUE	FALSE	-1.29507	-0.573084	0.291175	0.405963
cg02076355	11067	C10orf10	chr10	45474372	45474373	CGI-S-Shelf	CGI-Shelf	TRUE	TRUE	FALSE	-2.36658	-1.58802	0.164423	0.265458
cg02076355	83937	RASSF4	chr10	45474372	45474373	CGI-S-Shelf	CGI-Shelf	TRUE	TRUE	FALSE	-2.36658	-1.58802	0.164423	0.265458
cg02076607	390664	C1QTNF8	chr16	1146421	1146422	CGI	CGI	TRUE	FALSE	FALSE	0.451102	1.89273	0.573916	0.743234
cg02077068	51704	GPRC5B	chr16	19872240	19872241	CGI-S-Shelf	CGI-Shelf	FALSE	TRUE	FALSE	-2.16917	0.611268	0.184394	0.582255
cg02077216	10769	PLK2	chr5	57753951	57753952	CGI-N-Shore	CGI-Shore	FALSE	TRUE	FALSE	2.67364	3.66213	0.849584	0.924538
cg02079551	22986	SORCS3	chr10	107023377	107023378	Non-CGI	Non-CGI	FALSE	TRUE	FALSE	0.768258	1.43524	0.625164	0.721544
cg02079908	27436	EML4	chr2	42411760	42411761	Non-CGI	Non-CGI	FALSE	TRUE	FALSE	3.29259	3.99103	0.902568	0.939345
cg02083080	NA	NA	chr6	169104434	169104435	CGI-N-Shore	CGI-Shore	FALSE	FALSE	TRUE	0.870153	2.61398	0.639307	0.848608
cg02083836	339524	LOC339524	chr1	87617350	87617351	CGI	CGI	FALSE	TRUE	FALSE	-1.91574	1.81373	0.214524	0.725663
cg02084553	6323	SCN1A	chr2	166937779	166937780	Non-CGI	Non-CGI	TRUE	TRUE	FALSE	-0.0736348	0.944868	0.485891	0.65124
cg02084561	170692	ADAMTS18	chr16	77317555	77317556	Non-CGI	Non-CGI	FALSE	TRUE	FALSE	1.34556	2.00333	0.710758	0.790481
cg02085119	114569	MAL2	chr8	120219902	120219903	CGI-N-Shore	CGI-Shore	TRUE	FALSE	FALSE	1.44645	2.06873	0.725863	0.797724
cg02086725	10451	VAV3	chr1	108123232	108123233	Non-CGI	Non-CGI	FALSE	TRUE	FALSE	1.9038	2.74093	0.780965	0.861402
cg02088237	221458	KIF6	chr6	39304008	39304009	Non-CGI	Non-CGI	FALSE	TRUE	FALSE	-3.65462	-2.48896	0.0744749	0.169109
cg02091808	NA	NA	chr5	67780261	67780262	Non-CGI	Non-CGI	FALSE	FALSE	TRUE	-0.0530043	1.07875	0.489241	0.66538
cg02092102	NA	NA	chr7	128555896	128555897	CGI	CGI	FALSE	FALSE	TRUE	-1.67722	-0.36372	0.241903	0.445025
cg02093811	NA	NA	chr2	233277840	233277841	CGI-S-Shelf	CGI-Shelf	FALSE	FALSE	TRUE	0.200232	1.60332	0.534146	0.745331
cg02094018	10400	PEMT	chr17	17485934	17485935	Non-CGI	Non-CGI	TRUE	TRUE	FALSE	3.38226	4.1372	0.906812	0.944334
cg02094273	11098	PRSS23	chr11	86636018	86636019	Non-CGI	Non-CGI	FALSE	TRUE	FALSE	-1.15756	0.101325	0.311077	0.514589
cg02097429	NA	NA	chr16	27210995	27210996	CGI-N-Shelf	CGI-Shelf	FALSE	FALSE	TRUE	-1.27611	1.02061	0.295345	0.660328
cg02097604	146691	TOM1L2	chr17	17750910	17750911	Non-CGI	Non-CGI	FALSE	TRUE	FALSE	2.55979	3.21181	0.85078	0.899054
cg02099194	8600	TNFSF11	chr13	43149689	43149690	CGI-S-Shore	CGI-Shore	FALSE	TRUE	FALSE	-1.40857	-0.0914277	0.277304	0.486082
cg02099418	940	CD28	chr2	204571146	204571147	Non-CGI	Non-CGI	TRUE	FALSE	FALSE	1.53995	2.58626	0.740358	0.846567
cg02101486	1749	DLX5	chr7	96652245	96652246	CGI	CGI	FALSE	TRUE	FALSE	-1.53715	0.0730573	0.258607	0.509042
cg02101812	NA	NA	chr1	33447089	33447090	Non-CGI	Non-CGI	FALSE	FALSE	TRUE	-0.644483	0.571509	0.393916	0.589837
cg02103362	261734	NPHP4	chr1	5931895	5931896	CGI-N-Shore	CGI-Shore	FALSE	TRUE	FALSE	3.02664	3.66504	0.884306	0.925156
cg02104392	NA	NA	chr2	134578960	134578961	Non-CGI	Non-CGI	FALSE	FALSE	TRUE	-2.76288	-2.06913	0.130864	0.202836
cg02104644	9066	SYT7	chr11	61347820	61347821	CGI-N-Shore	CGI-Shore	FALSE	TRUE	FALSE	-2.26643	-1.41198	0.174297	0.291588
cg02105458	NA	NA	chr15	93653048	93653049	CGI	CGI	FALSE	FALSE	TRUE	-0.133936	0.685593	0.477704	0.611488
cg02107824	340706	VWA2	chr10	115997879	115997880	CGI-N-Shore	CGI-Shore	TRUE	FALSE	FALSE	-0.545184	0.466136	0.408721	0.571571
cg02109699	170690	ADAMTS16	chr5	5234710	5234711	Non-CGI	Non-CGI	TRUE	TRUE	FALSE	0.729387	1.914	0.618765	0.775307
cg02109704	NA	NA	chr5	1721452	1721453	CGI-N-Shelf	CGI-Shelf	FALSE	FALSE	TRUE	-0.974221	0.0554202	0.341531	0.510603
cg02110048	9381	OTOF	chr2	26725464	26725465	CGI-N-Shore	CGI-Shore	FALSE	TRUE	FALSE	1.37926	2.65596	0.715759	0.850617
cg02112621	NA	NA	chr3	78387362	78387363	Non-CGI	Non-CGI	FALSE	FALSE	TRUE	-0.792132	0.0915534	0.373197	0.51547
cg02115416	152330	CNTN4	chr3	2940073	2940074	Non-CGI	Non-CGI	FALSE	TRUE	FALSE	-0.247479	1.19815	0.458053	0.687285
cg02118630	1788	DNMT3A	chr2	25552751	25552752	Non-CGI	Non-CGI	TRUE	TRUE	FALSE	1.8497	3.03047	0.776822	0.887207
cg02118630	100302246	MIR1301	chr2	25552751	25552752	Non-CGI	Non-CGI	TRUE	TRUE	FALSE	1.8497	3.03047	0.776822	0.887207
cg02119577	2114	ETS2	chr21	40195074	40195075	CGI-S-Shore	CGI-Shore	FALSE	TRUE	FALSE	0.861317	1.8268	0.641917	0.766646
cg02124022	5156	PDGFRA	chr4	54974886	54974887	CGI	CGI	FALSE	TRUE	FALSE	2.39852	3.06215	0.837631	0.887903
cg02124291	26659	OR7A5	chr19	14939260	14939261	Non-CGI	Non-CGI	TRUE	TRUE	FALSE	0.875553	1.78371	0.645303	0.769067
cg02128086	NA	NA	chr16	86714834	86714835	CGI-N-Shore	CGI-Shore	FALSE	FALSE	TRUE	-3.05425	-1.67479	0.108415	0.252221
cg02128417	26064	RAI14	chr5	34672436	34672437	Non-CGI	Non-CGI	FALSE	TRUE	FALSE	3.32901	4.01886	0.905086	0.940604
cg02130107	79447	PAGR1	chr16	29828598	29828599	CGI-S-Shore	CGI-Shore	FALSE	TRUE	FALSE	0.0207117	0.800295	0.50471	0.633592
cg02130107	552900	BOLA2	chr16	29828598	29828599	CGI-S-Shore	CGI-Shore	FALSE	TRUE	FALSE	0.0207117	0.800295	0.50471	0.633592
cg02131465	343035	RD3	chr1	211667297	211667298	Non-CGI	Non-CGI	TRUE	FALSE	FALSE	1.81278	2.42583	0.771986	0.837094
cg02131862	643803	KRTAP24-1	chr21	31654844	31654845	Non-CGI	Non-CGI	TRUE	FALSE	FALSE	-1.12546	-0.223853	0.324969	0.466109
cg02133456	NA	NA	chr7	11232035	11232036	Non-CGI	Non-CGI	FALSE	FALSE	TRUE	-0.410861	0.806727	0.43006	0.619638
cg02134720	4982	TNFRSF11B	chr8	119948501	119948502	Non-CGI	Non-CGI	FALSE	TRUE	FALSE	1.69921	2.75476	0.754718	0.845313
cg02135488	6196	RPS6KA2	chr6	166921807	166921808	CGI	CGI	FALSE	TRUE	FALSE	1.57765	2.697	0.744838	0.858726
cg02136849	NA	NA	chr7	37533649	37533650	CGI	CGI	FALSE	FALSE	TRUE	2.01385	2.71603	0.791321	0.85994
cg02138682	58189	WFDC1	chr16	84336042	84336043	CGI	CGI	FALSE	TRUE	FALSE	0.405276	2.59548	0.568101	0.843185
cg02139853	116987	AGAP1	chr2	236867685	236867686	CGI	CGI	FALSE	TRUE	FALSE	0.815315	2.66877	0.624207	0.843953
cg02142995	NA	NA	chr8	8991004	8991005	Non-CGI	Non-CGI	FALSE	FALSE	TRUE	-1.11792	1.31613	0.319469	0.677893
cg02147316	93	ACVR2B	chr3	38501099	38501100	CGI-S-Shelf	CGI-Shelf	FALSE	TRUE	FALSE	1.06087	3.02338	0.668413	0.862108
cg02149446	728	C5AR1	chr19	47812519	47812520	Non-CGI	Non-CGI	TRUE	FALSE	FALSE	-2.37789	-1.42882	0.163391	0.281534
cg02149532	NA	NA	chr6	166088287	166088288	Non-CGI	Non-CGI	FALSE	FALSE	TRUE	2.14111	2.90541	0.806511	0.876276
cg02150018	NA	NA	chr12	56781267	56781268	Non-CGI	Non-CGI	FALSE	FALSE	TRUE	-1.08052	0.865596	0.324724	0.642796
cg02150582	NA	NA	chr6	9398309	9398310	CGI-N-Shore	CGI-Shore	FALSE	FALSE	TRUE	1.23203	1.97358	0.693021	0.785905
cg02151997	7148	TNXB	chr6	32060791	32060792	CGI-N-Shelf	CGI-Shelf	FALSE	TRUE	FALSE	-0.494268	2.31675	0.417096	0.822802
cg02154084	5521	PPP2R2B	chr5	146184364	146184365	Non-CGI	Non-CGI	FALSE	TRUE	FALSE	-0.261647	0.763882	0.456827	0.625312
cg02158978	57666	FBRSL1	chr12	133134938	133134939	CGI-S-Shore	CGI-Shore	FALSE	TRUE	FALSE	-0.678272	1.63829	0.387915	0.730511
cg02160738	NA	NA	chr11	60961816	60961817	Non-CGI	Non-CGI	FALSE	FALSE	TRUE	0.107988	0.949892	0.519655	0.654341
cg02161701	374654	KIF7	chr15	90199179	90199180	CGI-S-Shore	CGI-Shore	TRUE	FALSE	FALSE	1.99169	2.68796	0.792033	0.850203
cg02164615	NA	NA	chr16	17727321	17727322	Non-CGI	Non-CGI	FALSE	FALSE	TRUE	0.132705	1.1084	0.522776	0.667908
cg02169553	9780	PIEZO1	chr16	88784822	88784823	CGI-S-Shore	CGI-Shore	TRUE	TRUE	FALSE	2.67547	4.3305	0.857417	0.949834
cg02170386	NA	NA	chr14	70316972	70316973	CGI	CGI	FALSE	FALSE	TRUE	-2.88702	-1.62999	0.123035	0.257796
cg02170784	30812	SOX8	chr16	1034527	1034528	CGI	CGI	FALSE	TRUE	FALSE	-0.707884	1.44918	0.39026	0.710429
cg02171725	25962	KIAA1429	chr8	95564335	95564336	CGI-N-Shore	CGI-Shore	FALSE	TRUE	FALSE	-1.04128	0.233382	0.341848	0.539248
cg02175033	9766	KIAA0247	chr14	70098523	70098524	Non-CGI	Non-CGI	FALSE	TRUE	FALSE	-1.04195	2.09418	0.328506	0.791545
cg02184918	9564	BCAR1	chr16	75269222	75269223	CGI	CGI	TRUE	TRUE	FALSE	2.14148	2.82477	0.813601	0.865976
cg02185675	23639	LRRC6	chr8	133594318	133594319	Non-CGI	Non-CGI	FALSE	TRUE	FALSE	-0.0204337	0.712153	0.496431	0.616729
cg02188160	401014	TEX41	chr2	145823182	145823183	Non-CGI	Non-CGI	FALSE	TRUE	FALSE	1.47627	2.68801	0.733465	0.854533
cg02190636	997	CDC34	chr19	541711	541712	CGI	CGI	FALSE	TRUE	FALSE	2.20758	2.96445	0.818618	0.880237
cg02191312	5729	PTGDR	chr14	52734397	52734398	CGI	CGI	TRUE	FALSE	FALSE	-3.64248	-2.66276	0.0750412	0.164765
cg02192490	NA	NA	chr6	168085530	168085531	Non-CGI	Non-CGI	TRUE	TRUE	FALSE	-1.23702	0.316403	0.305584	0.553942
cg02192528	152992	TRMT44	chr4	8478146	8478147	CGI-S-Shore	CGI-Shore	FALSE	TRUE	FALSE	1.06272	1.98734	0.670539	0.769358
cg02192555	4482	MSRA	chr8	9952926	9952927	Non-CGI	Non-CGI	TRUE	TRUE	FALSE	0.922305	2.94946	0.650362	0.876495
cg02193861	6251	RSU1	chr10	16822712	16822713	Non-CGI	Non-CGI	FALSE	TRUE	FALSE	1.76458	2.79167	0.766071	0.863606
cg02194223	2128	EVX1	chr7	27285433	27285434	CGI	CGI	FALSE	TRUE	FALSE	-1.66924	-0.779772	0.245872	0.381132
cg02195657	127731	VWA5B1	chr1	20617283	20617284	Non-CGI	Non-CGI	TRUE	FALSE	FALSE	-1.83165	-1.13205	0.222318	0.323021
cg02196147	4843	NOS2	chr17	26127480	26127481	Non-CGI	Non-CGI	TRUE	TRUE	FALSE	-0.145118	0.677955	0.480752	0.608454
cg02198513	80008	TMEM156	chr4	38987121	38987122	Non-CGI	Non-CGI	FALSE	TRUE	FALSE	1.802	2.98957	0.764486	0.880612
cg02202742	NA	NA	chr16	3695595	3695596	Non-CGI	Non-CGI	FALSE	FALSE	TRUE	0.251233	1.16648	0.543066	0.682616
cg02206108	8911	CACNA1I	chr22	40079626	40079627	CGI-N-Shelf	CGI-Shelf	FALSE	TRUE	FALSE	-0.518494	0.948632	0.41418	0.64187
cg02206852	147011	PROCA1	chr17	27030540	27030541	Non-CGI	Non-CGI	FALSE	TRUE	FALSE	2.03556	2.91966	0.795787	0.870616
cg02207386	NA	NA	chr7	25895834	25895835	CGI-S-Shore	CGI-Shore	FALSE	FALSE	TRUE	-1.99486	0.73501	0.204002	0.604851
cg02210151	2263	FGFR2	chr10	123356041	123356042	CGI-S-Shore	CGI-Shore	TRUE	TRUE	FALSE	1.78904	3.00016	0.761867	0.876807
cg02210543	389941	C1QL3	chr10	16559370	16559371	CGI-N-Shelf	CGI-Shelf	FALSE	TRUE	FALSE	2.62962	3.55502	0.847974	0.918597
cg02212389	51667	NUB1	chr7	151070905	151070906	CGI-N-Shelf	CGI-Shelf	FALSE	TRUE	FALSE	1.03063	2.27618	0.668615	0.815625
cg02216394	7726	TRIM26	chr6	30178715	30178716	CGI-N-Shelf	CGI-Shelf	FALSE	TRUE	FALSE	3.83353	4.4801	0.933208	0.956786
cg02218496	NA	NA	chr2	172948176	172948177	CGI	CGI	FALSE	FALSE	TRUE	-0.0614555	0.723764	0.490949	0.620187
cg02220008	221692	PHACTR1	chr6	13192742	13192743	Non-CGI	Non-CGI	FALSE	TRUE	FALSE	-0.0595129	1.52729	0.492238	0.724436
cg02222791	NA	NA	chr14	88621424	88621425	Non-CGI	Non-CGI	TRUE	FALSE	FALSE	-0.450868	0.791455	0.42512	0.628484
cg02222860	NA	NA	chr13	22773590	22773591	Non-CGI	Non-CGI	FALSE	TRUE	FALSE	1.96995	3.23302	0.786307	0.897206
cg02225137	NA	NA	chr17	2656868	2656869	CGI-N-Shore	CGI-Shore	FALSE	FALSE	TRUE	-0.364393	0.664584	0.43946	0.61015
cg02228042	222256	CDHR3	chr7	105603432	105603433	Non-CGI	Non-CGI	TRUE	TRUE	FALSE	0.906568	2.36985	0.639111	0.819194
cg02228492	9953	HS3ST3B1	chr17	14224797	14224798	Non-CGI	Non-CGI	FALSE	TRUE	FALSE	-1.73479	-0.585457	0.236741	0.407641
cg02229135	100302239	MIR548F5	chr13	36053118	36053119	CGI	CGI	FALSE	TRUE	FALSE	0.269482	3.36228	0.543988	0.900679
cg02229135	26960	NBEA	chr13	36053118	36053119	CGI	CGI	FALSE	TRUE	FALSE	0.269482	3.36228	0.543988	0.900679
cg02229261	3036	HAS1	chr19	52222431	52222432	CGI-N-Shore	CGI-Shore	TRUE	TRUE	FALSE	0.225392	0.948867	0.538388	0.651508
cg02230811	NA	NA	chr14	56967892	56967893	Non-CGI	Non-CGI	FALSE	FALSE	TRUE	-0.77458	0.179927	0.372519	0.531746
cg02232089	4862	NPAS2	chr2	101440696	101440697	CGI-S-Shelf	CGI-Shelf	FALSE	TRUE	FALSE	1.9055	2.74646	0.771291	0.862602
cg02232988	10979	FERMT2	chr14	53340748	53340749	Non-CGI	Non-CGI	FALSE	TRUE	FALSE	-1.02594	0.225658	0.333217	0.530417
cg02234314	89887	ZNF628	chr19	55986224	55986225	CGI-N-Shore	CGI-Shore	TRUE	FALSE	FALSE	2.22626	3.92501	0.819905	0.937888
cg02237208	NA	NA	chr1	2250525	2250526	CGI	CGI	FALSE	FALSE	TRUE	-0.778665	-0.117609	0.370278	0.480068
cg02238178	3560	IL2RB	chr22	37545969	37545970	Non-CGI	Non-CGI	TRUE	FALSE	FALSE	-1.15362	-0.188414	0.311618	0.46831
cg02238526	1778	DYNC1H1	chr14	102516429	102516430	CGI-S-Shore	CGI-Shore	FALSE	TRUE	FALSE	0.473132	1.3908	0.57656	0.698781
cg02238550	NA	NA	chr17	75739000	75739001	Non-CGI	Non-CGI	FALSE	FALSE	TRUE	0.345897	0.984406	0.558314	0.661368
cg02243630	23240	KIAA0922	chr4	154386540	154386541	CGI-N-Shore	CGI-Shore	TRUE	FALSE	FALSE	1.07278	3.1927	0.671019	0.885466
cg02244175	NA	NA	chr5	95178740	95178741	Non-CGI	Non-CGI	FALSE	FALSE	TRUE	2.53359	3.69547	0.839115	0.922926
cg02244386	2888	GRB14	chr2	165473994	165473995	CGI-N-Shelf	CGI-Shelf	FALSE	TRUE	FALSE	0.0382957	0.970617	0.505181	0.650176
cg02244583	116987	AGAP1	chr2	236773260	236773261	CGI	CGI	FALSE	TRUE	FALSE	1.3417	3.21952	0.683998	0.896771
cg02245810	1375	CPT1B	chr22	51017432	51017433	CGI-S-Shore	CGI-Shore	TRUE	TRUE	FALSE	-0.515942	0.466882	0.417238	0.578948
cg02245810	1120	CHKB	chr22	51017432	51017433	CGI-S-Shore	CGI-Shore	TRUE	TRUE	FALSE	-0.515942	0.466882	0.417238	0.578948
cg02245810	386593	CHKB-CPT1B	chr22	51017432	51017433	CGI-S-Shore	CGI-Shore	TRUE	TRUE	FALSE	-0.515942	0.466882	0.417238	0.578948
cg02246002	NA	NA	chr13	37101457	37101458	Non-CGI	Non-CGI	FALSE	FALSE	TRUE	0.141888	0.841031	0.526488	0.635693
cg02246426	392255	GDF6	chr8	97162431	97162432	CGI-N-Shelf	CGI-Shelf	FALSE	TRUE	FALSE	-0.104975	2.20775	0.483146	0.792046
cg02247160	1499	CTNNB1	chr3	41243829	41243830	CGI-S-Shore	CGI-Shore	FALSE	TRUE	FALSE	-1.88561	-0.693692	0.21587	0.392743
cg02248486	3202	HOXA5	chr7	27183196	27183197	CGI	CGI	TRUE	TRUE	FALSE	0.599011	3.16251	0.589809	0.887226
cg02248486	100133311	HOXA-AS3	chr7	27183196	27183197	CGI	CGI	TRUE	TRUE	FALSE	0.599011	3.16251	0.589809	0.887226
cg02249228	340357	LOC340357	chr8	12669060	12669061	Non-CGI	Non-CGI	TRUE	FALSE	FALSE	-1.23167	0.606506	0.299713	0.597566
cg02249228	101409254	LINC00681	chr8	12669060	12669061	Non-CGI	Non-CGI	TRUE	FALSE	FALSE	-1.23167	0.606506	0.299713	0.597566
cg02251175	NA	NA	chr8	24855843	24855844	CGI-N-Shore	CGI-Shore	FALSE	FALSE	TRUE	-0.847445	1.1269	0.359837	0.668804
cg02251243	NA	NA	chr2	74210857	74210858	CGI	CGI	FALSE	FALSE	TRUE	-0.233781	0.700451	0.46026	0.605387
cg02253499	23609	MKRN2	chr3	12602046	12602047	CGI-S-Shelf	CGI-Shelf	FALSE	TRUE	FALSE	0.380252	1.07293	0.564069	0.665085
cg02253535	8566	PDXK	chr21	45147292	45147293	CGI-N-Shore	CGI-Shore	TRUE	TRUE	FALSE	-1.24809	0.835141	0.299259	0.611296
cg02253552	57209	ZNF248	chr10	38147693	38147694	CGI-S-Shore	CGI-Shore	TRUE	FALSE	FALSE	0.633675	1.71539	0.603113	0.755731
cg02253978	146225	CMTM2	chr16	66615649	66615650	CGI-S-Shore	CGI-Shore	FALSE	TRUE	FALSE	0.940718	2.6643	0.655276	0.858184
cg02254800	57521	RPTOR	chr17	78924086	78924087	CGI	CGI	FALSE	TRUE	FALSE	1.55066	2.3631	0.740137	0.825912
cg02255004	118425	PCAT4	chr4	80748660	80748661	Non-CGI	Non-CGI	TRUE	FALSE	FALSE	2.28815	2.92279	0.826592	0.879852
cg02255454	NA	NA	chr3	176635508	176635509	Non-CGI	Non-CGI	FALSE	FALSE	TRUE	2.01929	2.88303	0.798792	0.873793
cg02260430	NA	NA	chr5	149673232	149673233	CGI-N-Shelf	CGI-Shelf	FALSE	FALSE	TRUE	1.44721	2.58213	0.720171	0.84047
cg02262221	401145	CCSER1	chr4	91047852	91047853	CGI-N-Shore	CGI-Shore	TRUE	FALSE	FALSE	-1.2087	0.0627478	0.306441	0.509996
cg02264229	NA	NA	chr14	95240560	95240561	CGI	CGI	FALSE	FALSE	TRUE	1.19528	2.47875	0.689364	0.810975
cg02264779	135	ADORA2A	chr22	24817310	24817311	CGI-N-Shelf	CGI-Shelf	FALSE	TRUE	FALSE	0.889142	1.84929	0.64497	0.771933
cg02264779	23384	SPECC1L	chr22	24817310	24817311	CGI-N-Shelf	CGI-Shelf	FALSE	TRUE	FALSE	0.889142	1.84929	0.64497	0.771933
cg02264895	3687	ITGAX	chr16	31385282	31385283	CGI-S-Shore	CGI-Shore	FALSE	TRUE	FALSE	-1.44413	-0.105641	0.272986	0.482586
cg02265721	NA	NA	chr12	64916007	64916008	Non-CGI	Non-CGI	FALSE	FALSE	TRUE	0.0011568	1.65858	0.500174	0.753494
cg02266236	NA	NA	chr5	159418468	159418469	CGI-S-Shelf	CGI-Shelf	FALSE	FALSE	TRUE	1.81506	2.56325	0.771466	0.8522
cg02266731	1368	CPM	chr12	69357333	69357334	Non-CGI	Non-CGI	TRUE	FALSE	FALSE	0.706595	2.6013	0.617546	0.848725
cg02268561	9397	NMT2	chr10	15212066	15212067	CGI-S-Shore	CGI-Shore	TRUE	FALSE	FALSE	0.244195	2.02608	0.541024	0.782712
cg02269984	NA	NA	chr15	60429806	60429807	Non-CGI	Non-CGI	FALSE	FALSE	TRUE	2.01639	2.63686	0.794276	0.855122
cg02270952	55971	BAIAP2L1	chr7	97952898	97952899	CGI-N-Shore	CGI-Shore	FALSE	TRUE	FALSE	-2.03902	-0.754775	0.197464	0.385019
cg02272751	5184	PEPD	chr19	33882848	33882849	CGI-S-Shelf	CGI-Shelf	FALSE	TRUE	FALSE	-0.312933	1.04207	0.446716	0.651104
cg02274366	NA	NA	chr6	123154275	123154276	Non-CGI	Non-CGI	FALSE	FALSE	TRUE	-1.56923	0.759506	0.263763	0.620953
cg02275784	1740	DLG2	chr11	85242554	85242555	Non-CGI	Non-CGI	FALSE	TRUE	FALSE	-0.817225	0.353351	0.365518	0.554422
cg02276831	158381	ATP8B5P	chr9	35406117	35406118	Non-CGI	Non-CGI	TRUE	FALSE	FALSE	-0.11021	0.572999	0.482586	0.592103
cg02277530	10801	2009-09-01	chr17	75396462	75396463	CGI-N-Shore	CGI-Shore	TRUE	TRUE	FALSE	-1.13919	2.21587	0.314245	0.79273
cg02278841	400359	C15orf53	chr15	38988860	38988861	Non-CGI	Non-CGI	TRUE	FALSE	FALSE	0.692068	2.51809	0.611622	0.836702
cg02279471	148534	TMEM56	chr1	95650030	95650031	Non-CGI	Non-CGI	FALSE	TRUE	FALSE	2.72816	3.47803	0.860964	0.91459
cg02279471	100527978	TMEM56-RWDD3	chr1	95650030	95650031	Non-CGI	Non-CGI	FALSE	TRUE	FALSE	2.72816	3.47803	0.860964	0.91459
cg02279503	NA	NA	chr1	30374065	30374066	CGI-S-Shore	CGI-Shore	FALSE	FALSE	TRUE	0.545079	1.39061	0.5917	0.713141
cg02280226	79058	ASPSCR1	chr17	79966366	79966367	CGI	CGI	FALSE	TRUE	FALSE	-1.07517	-0.0981508	0.324931	0.483802
cg02280912	730051	ZNF814	chr19	58400095	58400096	CGI	CGI	FALSE	TRUE	FALSE	-2.42909	-1.63771	0.15867	0.257153
cg02281038	117579	RLN3	chr19	14139137	14139138	CGI-S-Shore	CGI-Shore	TRUE	FALSE	FALSE	1.48263	2.15939	0.734747	0.801126
cg02286809	NA	NA	chr15	101629375	101629376	CGI	CGI	FALSE	FALSE	TRUE	-1.15924	-0.0280457	0.312226	0.494649
cg02286857	285051	C2orf61	chr2	47297177	47297178	Non-CGI	Non-CGI	FALSE	TRUE	FALSE	-2.39921	-1.70766	0.163491	0.24846
cg02286857	57217	TTC7A	chr2	47297177	47297178	Non-CGI	Non-CGI	FALSE	TRUE	FALSE	-2.39921	-1.70766	0.163491	0.24846
[truncated: 18,294 more rows]
