# Supplementary material for: H3K4me1 marks DNA regions hypomethylated during aging in human stem and differentiated cells
Source: HighWire-hosted journal article supplement (doi:10.1101/gr.169011.113), 2014-09-30
Supplement: Supplemental_Table_3.xlsx [file Supplemental_Table_3.xlsx]

## Sheet: ST3
Supplementary Table 3: List of CpG sites hypomethylated in MSCs during aging
Target ID	geneId	geneSymbol	Chromosome	start	end	hmm.cpgi	prom.reg	intra.reg	inter.reg	avg_m_young	avg_m_old	avg_beta_young	avg_beta_old
cg00000029	5934	RBL2	chr16	53468112	53468113	CGI	TRUE	FALSE	FALSE	0.843942	0.0459501	0.637838	0.505167
cg00000109	64778	FNDC3B	chr3	171916037	171916038	Non-CGI	FALSE	TRUE	FALSE	3.0736	2.18436	0.889562	0.803512
cg00000321	6422	SFRP1	chr8	41167802	41167803	CGI-S-Shore	TRUE	FALSE	FALSE	0.260446	-0.436298	0.544767	0.432512
cg00001099	85481	PSKH2	chr8	87081553	87081554	CGI-N-Shore	FALSE	TRUE	FALSE	2.79984	1.21591	0.858964	0.675967
cg00001809	NA	NA	chr14	101154025	101154026	CGI-N-Shelf	FALSE	FALSE	TRUE	2.78895	2.11538	0.870337	0.805927
cg00002033	57622	LRFN1	chr19	39798481	39798482	CGI	FALSE	TRUE	FALSE	0.0108739	-2.13072	0.501625	0.20967
cg00002593	83756	TAS1R3	chr1	1268793	1268794	CGI	FALSE	TRUE	FALSE	1.83007	0.890477	0.774797	0.639784
cg00003345	54897	CASZ1	chr1	10816499	10816500	Non-CGI	FALSE	TRUE	FALSE	1.66849	0.140656	0.75186	0.522865
cg00004089	439921	MXRA7	chr17	74678836	74678837	Non-CGI	FALSE	TRUE	FALSE	1.9335	0.386563	0.782032	0.56317
cg00004421	100533955	SENP3-EIF4A1	chr17	7475079	7475080	CGI-N-Shore	TRUE	TRUE	FALSE	1.96747	1.30903	0.78876	0.705276
cg00004421	26168	SENP3	chr17	7475079	7475080	CGI-N-Shore	TRUE	TRUE	FALSE	1.96747	1.30903	0.78876	0.705276
cg00004562	1041	CDSN	chr6	31089293	31089294	Non-CGI	TRUE	TRUE	FALSE	2.80272	2.02406	0.870118	0.787305
cg00004562	170679	PSORS1C1	chr6	31089293	31089294	Non-CGI	TRUE	TRUE	FALSE	2.80272	2.02406	0.870118	0.787305
cg00004773	NA	NA	chr12	76722955	76722956	Non-CGI	FALSE	FALSE	TRUE	1.28633	-0.0547008	0.695965	0.491787
cg00004806	56895	AGPAT4	chr6	161558105	161558106	Non-CGI	FALSE	TRUE	FALSE	2.16239	1.35878	0.808364	0.711015
cg00004996	9108	MTMR7	chr8	17271535	17271536	CGI-S-Shore	TRUE	FALSE	FALSE	3.16163	2.52536	0.89572	0.844859
cg00005112	11060	WWP2	chr16	69958840	69958841	Non-CGI	TRUE	TRUE	FALSE	-1.59918	-2.34369	0.256323	0.164939
cg00005619	399888	FAM180B	chr11	47608722	47608723	CGI-N-Shelf	FALSE	TRUE	FALSE	3.63184	1.94914	0.923512	0.785193
cg00005740	NA	NA	chr13	24079418	24079419	Non-CGI	FALSE	FALSE	TRUE	1.5527	0.154922	0.732109	0.525556
cg00006459	NA	NA	chr4	148635716	148635717	Non-CGI	FALSE	FALSE	TRUE	2.13925	-1.15782	0.796356	0.325172
cg00007221	5792	PTPRF	chr1	43999020	43999021	CGI-S-Shore	FALSE	TRUE	FALSE	3.46418	1.90038	0.911028	0.782504
cg00007239	152756	FAM218A	chr4	165877045	165877046	CGI-N-Shore	TRUE	TRUE	FALSE	3.70653	2.9839	0.925601	0.879391
cg00007239	391712	TRIM61	chr4	165877045	165877046	CGI-N-Shore	TRUE	TRUE	FALSE	3.70653	2.9839	0.925601	0.879391
cg00007800	NA	NA	chr1	1838518	1838519	CGI-N-Shore	FALSE	FALSE	TRUE	2.30091	1.42605	0.825911	0.725343
cg00008544	9945	GFPT2	chr5	179778527	179778528	CGI-N-Shore	FALSE	TRUE	FALSE	3.32128	1.37021	0.906777	0.689582
cg00010445	5989	RFX1	chr19	14089630	14089631	CGI	FALSE	TRUE	FALSE	0.469112	-1.55775	0.576558	0.264727
cg00010853	170954	PPP1R18	chr6	30653167	30653168	CGI-N-Shore	TRUE	TRUE	FALSE	-0.874869	-1.60476	0.360744	0.254621
cg00010954	NA	NA	chr16	54620055	54620056	CGI	FALSE	FALSE	TRUE	2.94389	0.944901	0.877155	0.645425
cg00011203	NA	NA	chr1	9259066	9259067	CGI-S-Shore	FALSE	FALSE	TRUE	-1.55293	-2.20487	0.259246	0.186044
cg00011616	NA	NA	chr17	75672423	75672424	CGI-N-Shore	FALSE	FALSE	TRUE	2.75268	0.546562	0.847829	0.579782
cg00012576	10082	GPC6	chr13	94568320	94568321	Non-CGI	FALSE	TRUE	FALSE	4.02379	3.20801	0.940815	0.88993
cg00012692	10804	GJB6	chr13	20805487	20805488	CGI-N-Shore	TRUE	TRUE	FALSE	1.4261	0.310187	0.715461	0.550436
cg00013804	8853	ASAP2	chr2	9358577	9358578	Non-CGI	FALSE	TRUE	FALSE	1.71894	-0.736972	0.756699	0.384444
cg00014830	NA	NA	chr17	77765733	77765734	CGI	FALSE	FALSE	TRUE	0.95016	-0.89857	0.648446	0.363752
cg00014900	1802	DPH2	chr1	44438411	44438412	CGI-N-Shore	FALSE	TRUE	FALSE	3.27578	2.55282	0.902345	0.84108
cg00015340	NA	NA	chr6	19086423	19086424	Non-CGI	FALSE	TRUE	FALSE	2.1732	0.94362	0.806687	0.651816
cg00015603	150678	MYEOV2	chr2	241069873	241069874	CGI-S-Shore	FALSE	TRUE	FALSE	3.42001	2.78402	0.911839	0.862569
cg00016255	100885848	PTGES3L	chr17	41133928	41133929	CGI-S-Shore	TRUE	TRUE	FALSE	0.564893	-0.33463	0.589792	0.445438
cg00016255	146923	RUNDC1	chr17	41133928	41133929	CGI-S-Shore	TRUE	TRUE	FALSE	0.564893	-0.33463	0.589792	0.445438
cg00016255	100885850	PTGES3L-AARSD1	chr17	41133928	41133929	CGI-S-Shore	TRUE	TRUE	FALSE	0.564893	-0.33463	0.589792	0.445438
cg00017429	NA	NA	chr14	98170160	98170161	Non-CGI	FALSE	FALSE	TRUE	2.78463	1.4694	0.861684	0.7254
cg00017842	NA	NA	chr2	119528421	119528422	CGI-N-Shelf	FALSE	FALSE	TRUE	2.03132	0.956418	0.796155	0.651265
cg00018184	6275	S100A4	chr1	153519850	153519851	Non-CGI	TRUE	TRUE	FALSE	0.11436	-1.21582	0.519657	0.310165
cg00018184	6274	S100A3	chr1	153519850	153519851	Non-CGI	TRUE	TRUE	FALSE	0.11436	-1.21582	0.519657	0.310165
cg00019678	84915	FAM222A	chr12	110154229	110154230	CGI-S-Shore	FALSE	TRUE	FALSE	2.83211	1.90713	0.870483	0.785642
cg00020390	81844	TRIM56	chr7	100727888	100727889	CGI-N-Shelf	TRUE	FALSE	FALSE	3.75637	2.93965	0.929747	0.87889
cg00020991	84869	CBR4	chr4	169930429	169930430	CGI-N-Shore	FALSE	TRUE	FALSE	0.743391	-0.46347	0.61845	0.423815
cg00021275	NA	NA	chr2	128142155	128142156	CGI-N-Shelf	FALSE	FALSE	TRUE	3.59473	2.01581	0.920928	0.793685
cg00021600	54550	NECAB2	chr16	84003607	84003608	CGI-S-Shore	TRUE	TRUE	FALSE	2.63208	1.79788	0.851575	0.758042
cg00021762	NA	NA	chr22	27832684	27832685	Non-CGI	FALSE	FALSE	TRUE	3.71076	2.09382	0.928071	0.77927
cg00022076	23659	PLA2G15	chr16	68293990	68293991	Non-CGI	FALSE	TRUE	FALSE	3.1666	2.28175	0.898455	0.811135
cg00022101	1793	DOCK1	chr10	129079552	129079553	Non-CGI	FALSE	TRUE	FALSE	2.17846	0.888932	0.800989	0.639544
cg00022997	80741	LY6G5C	chr6	31650808	31650809	CGI	FALSE	TRUE	FALSE	1.36821	-0.689065	0.711781	0.393469
cg00023001	404093	CUEDC1	chr17	55938748	55938749	CGI-N-Shore	FALSE	FALSE	TRUE	-0.669027	-1.28913	0.387041	0.291574
cg00023024	3352	HTR1D	chr1	23521272	23521273	CGI-S-Shore	TRUE	FALSE	FALSE	0.0330678	-1.24639	0.506337	0.30114
cg00023174	388507	ZNF788	chr19	12202386	12202387	CGI-N-Shore	TRUE	FALSE	FALSE	2.69575	2.05687	0.864029	0.79831
cg00023673	NA	NA	chr16	86755632	86755633	Non-CGI	TRUE	FALSE	FALSE	3.26823	2.22921	0.902164	0.816032
cg00023919	29984	RHOD	chr11	66839191	66839192	CGI	FALSE	TRUE	FALSE	3.88338	1.91779	0.935176	0.769218
cg00024516	NA	NA	chr4	123506194	123506195	Non-CGI	FALSE	FALSE	TRUE	2.43286	1.70166	0.839086	0.747284
cg00024967	2122	MECOM	chr3	169377818	169377819	CGI	FALSE	TRUE	FALSE	3.85291	2.29023	0.927396	0.809132
cg00025331	9839	ZEB2	chr2	145147350	145147351	CGI	FALSE	TRUE	FALSE	2.18696	1.31461	0.812402	0.705515
cg00025496	29	ABR	chr17	1057343	1057344	CGI	FALSE	TRUE	FALSE	-1.13366	-2.17959	0.315803	0.182302
cg00025626	377007	KLHL30	chr2	239049392	239049393	CGI-S-Shore	TRUE	TRUE	FALSE	3.05041	1.83478	0.883238	0.77459
cg00025680	NA	NA	chr2	45180560	45180561	CGI-S-Shore	FALSE	FALSE	TRUE	0.653267	-0.0716146	0.608174	0.490265
cg00025972	NA	NA	chr4	187762312	187762313	Non-CGI	FALSE	FALSE	TRUE	3.75714	1.82344	0.927859	0.744829
cg00025991	22982	DIP2C	chr10	736625	736626	CGI-S-Shore	TRUE	FALSE	FALSE	1.45643	-0.128152	0.722853	0.477991
cg00026033	64375	IKZF4	chr12	56414490	56414491	Non-CGI	TRUE	TRUE	FALSE	0.83677	-0.011572	0.638407	0.497872
cg00026362	100132354	LOC100132354	chr6	43858741	43858742	Non-CGI	TRUE	FALSE	FALSE	2.58058	1.80208	0.850836	0.7552
cg00026474	6482	ST3GAL1	chr8	134585500	134585501	CGI-S-Shore	TRUE	FALSE	FALSE	0.671957	-0.921832	0.613187	0.355761
cg00026603	NA	NA	chr13	73141877	73141878	Non-CGI	FALSE	FALSE	TRUE	1.67815	0.441461	0.746978	0.570812
cg00027114	NA	NA	chr7	42740486	42740487	Non-CGI	FALSE	FALSE	TRUE	3.87118	2.02179	0.935389	0.779406
cg00027669	342667	STAC2	chr17	37382699	37382700	CGI-S-Shore	TRUE	FALSE	FALSE	1.27476	0.628838	0.70355	0.60606
cg00028135	26137	ZBTB20	chr3	114343673	114343674	Non-CGI	TRUE	TRUE	FALSE	-2.68955	-3.30309	0.143724	0.0928339
cg00028338	7468	WHSC1	chr4	1952723	1952724	CGI	TRUE	TRUE	FALSE	4.01974	3.15728	0.937431	0.890326
cg00030047	388591	RNF207	chr1	6268790	6268791	CGI-N-Shore	TRUE	TRUE	FALSE	0.83807	-0.0543824	0.639105	0.49101
cg00030427	NA	NA	chr6	169562540	169562541	CGI	FALSE	FALSE	TRUE	2.92514	0.660611	0.87561	0.602017
cg00030466	63976	PRDM16	chr1	3147891	3147892	CGI	FALSE	TRUE	FALSE	5.47405	4.83168	0.977533	0.964694
cg00030588	NA	NA	chr16	87100811	87100812	CGI	FALSE	FALSE	TRUE	2.60519	1.62737	0.856844	0.752031
cg00030604	NA	NA	chr1	2379831	2379832	CGI	FALSE	FALSE	TRUE	1.73025	1.08839	0.764385	0.677081
cg00030627	NA	NA	chr10	131811605	131811606	CGI	FALSE	FALSE	TRUE	3.9792	1.23881	0.936142	0.684726
cg00030774	23359	FAM189A1	chr15	29432143	29432144	CGI	FALSE	TRUE	FALSE	0.551391	-0.60641	0.59367	0.3985
cg00031105	6257	RXRB	chr6	33166117	33166118	CGI-N-Shore	TRUE	TRUE	FALSE	0.798946	0.169012	0.630997	0.529187
cg00031187	NA	NA	chr12	31522997	31522998	Non-CGI	TRUE	FALSE	FALSE	-0.532315	-1.43464	0.415897	0.280143
cg00031708	84668	FAM126A	chr7	23051361	23051362	CGI-N-Shore	FALSE	TRUE	FALSE	3.99562	2.18574	0.924061	0.785144
cg00031779	115701	ALPK2	chr18	56296243	56296244	Non-CGI	TRUE	FALSE	FALSE	3.9676	2.39172	0.938455	0.830407
cg00032366	9361	LONP1	chr19	5692159	5692160	CGI	FALSE	TRUE	FALSE	1.65036	0.952353	0.751794	0.651618
cg00032701	115704	EVI5L	chr19	7911195	7911196	CGI-N-Shelf	TRUE	TRUE	FALSE	3.13407	2.35114	0.892146	0.825841
cg00032912	NA	NA	chr15	96887529	96887530	CGI	FALSE	FALSE	TRUE	4.62374	3.67371	0.960451	0.910494
cg00033165	NA	NA	chr4	169952114	169952115	Non-CGI	FALSE	FALSE	TRUE	3.27527	2.2995	0.902516	0.822407
cg00033490	54677	CROT	chr7	87027887	87027888	Non-CGI	FALSE	TRUE	FALSE	3.91272	3.04353	0.934499	0.887367
cg00034154	9294	S1PR2	chr19	10337163	10337164	CGI-S-Shore	TRUE	TRUE	FALSE	-0.261886	-1.31204	0.456169	0.288995
cg00034755	79924	ADM2	chr22	50918361	50918362	CGI-N-Shore	TRUE	FALSE	FALSE	3.1257	2.44015	0.893834	0.835089
cg00035000	864	RUNX3	chr1	25255003	25255004	CGI-N-Shore	FALSE	TRUE	FALSE	3.11933	0.558961	0.881078	0.575179
cg00035347	22978	NT5C2	chr10	104953608	104953609	CGI-S-Shore	TRUE	FALSE	FALSE	1.61108	0.495366	0.747281	0.580943
cg00036347	100191040	C2CD4D	chr1	151811923	151811924	CGI-S-Shore	TRUE	TRUE	FALSE	0.947391	-0.449542	0.65018	0.426644
cg00036347	100132111	LOC100132111	chr1	151811923	151811924	CGI-S-Shore	TRUE	TRUE	FALSE	0.947391	-0.449542	0.65018	0.426644
cg00036723	6346	CCL1	chr17	32688878	32688879	Non-CGI	FALSE	TRUE	FALSE	-0.130579	-1.16089	0.478428	0.319414
cg00037457	9496	TBX4	chr17	59531744	59531745	CGI	FALSE	TRUE	FALSE	2.12705	0.346384	0.795543	0.54212
cg00037856	166348	KBTBD12	chr3	127633627	127633628	CGI-N-Shore	TRUE	FALSE	FALSE	0.681049	-0.950962	0.610952	0.34811
cg00037952	54838	WBP1L	chr10	104535276	104535277	Non-CGI	TRUE	TRUE	FALSE	0.833683	-1.1035	0.631243	0.325726
cg00038020	NA	NA	chr1	223575793	223575794	CGI-S-Shore	FALSE	FALSE	TRUE	0.896723	-0.66819	0.634821	0.393992
cg00039057	29796	UQCR10	chr22	30162510	30162511	CGI-N-Shore	TRUE	TRUE	FALSE	-1.52188	-2.30821	0.269357	0.172583
cg00039057	55954	ZMAT5	chr22	30162510	30162511	CGI-N-Shore	TRUE	TRUE	FALSE	-1.52188	-2.30821	0.269357	0.172583
cg00039480	146802	SLC47A2	chr17	19620267	19620268	CGI-S-Shelf	TRUE	TRUE	FALSE	2.62346	1.89217	0.857552	0.781674
cg00040312	3222	HOXC5	chr12	54424679	54424680	CGI	FALSE	TRUE	FALSE	3.20891	0.384915	0.889904	0.558991
cg00040312	3221	HOXC4	chr12	54424679	54424680	CGI	FALSE	TRUE	FALSE	3.20891	0.384915	0.889904	0.558991
cg00040575	57553	MICAL3	chr22	18506180	18506181	CGI-N-Shore	FALSE	TRUE	FALSE	0.975507	-0.419262	0.657927	0.43623
cg00042059	400954	EML6	chr2	55087588	55087589	Non-CGI	FALSE	TRUE	FALSE	0.150798	-0.787863	0.528147	0.377462
cg00043364	23338	PHF15	chr5	133916105	133916106	CGI-S-Shore	FALSE	TRUE	FALSE	2.42641	0.78314	0.832422	0.622873
cg00043444	NA	NA	chr6	134384706	134384707	Non-CGI	FALSE	FALSE	TRUE	3.6454	2.30428	0.921234	0.811458
cg00043564	136227	COL26A1	chr7	101005832	101005833	CGI-N-Shore	TRUE	FALSE	FALSE	0.0270394	-0.808883	0.504368	0.368021
cg00043599	149478	BTBD19	chr1	45274600	45274601	CGI-S-Shelf	TRUE	TRUE	FALSE	-0.747308	-1.46806	0.375885	0.269648
cg00043599	343521	TCTEX1D4	chr1	45274600	45274601	CGI-S-Shelf	TRUE	TRUE	FALSE	-0.747308	-1.46806	0.375885	0.269648
cg00044097	2274	FHL2	chr2	106055153	106055154	Non-CGI	TRUE	FALSE	FALSE	3.52219	2.12944	0.915951	0.796689
cg00044372	9764	KIAA0513	chr16	85070825	85070826	Non-CGI	FALSE	TRUE	FALSE	1.77704	-0.759085	0.764964	0.389202
cg00045118	862	RUNX1T1	chr8	93076177	93076178	Non-CGI	TRUE	TRUE	FALSE	4.37006	2.83271	0.95312	0.862859
cg00047287	1375	CPT1B	chr22	51016899	51016900	CGI	TRUE	TRUE	FALSE	0.945488	0.00777958	0.65438	0.503025
cg00047287	386593	CHKB-CPT1B	chr22	51016899	51016900	CGI	TRUE	TRUE	FALSE	0.945488	0.00777958	0.65438	0.503025
cg00047501	9689	BZW1	chr2	201680860	201680861	CGI-S-Shelf	FALSE	TRUE	FALSE	2.7509	1.9584	0.867102	0.792414
cg00047694	732275	LINC00917	chr16	86377053	86377054	CGI	FALSE	TRUE	FALSE	-0.92777	-1.71283	0.348884	0.2365
cg00048370	NA	NA	chr6	164506939	164506940	CGI	FALSE	FALSE	TRUE	-0.112774	-1.15201	0.481273	0.315816
cg00048381	103	ADAR	chr1	154587507	154587508	Non-CGI	FALSE	TRUE	FALSE	3.29585	2.18562	0.905617	0.8076
cg00049156	50999	TMED5	chr1	93643903	93643904	CGI-N-Shore	FALSE	TRUE	FALSE	2.49501	1.20858	0.836823	0.684401
cg00049475	6840	SVIL	chr10	29923736	29923737	Non-CGI	TRUE	TRUE	FALSE	3.46109	1.38975	0.912091	0.715026
cg00049595	NA	NA	chr6	41650636	41650637	CGI-N-Shore	FALSE	FALSE	TRUE	0.320649	-1.32694	0.554281	0.296621
cg00049709	63976	PRDM16	chr1	3057810	3057811	CGI	FALSE	TRUE	FALSE	4.27903	2.58591	0.950342	0.840811
cg00050133	NA	NA	chr4	178167583	178167584	Non-CGI	FALSE	FALSE	TRUE	4.0942	3.38343	0.944298	0.910242
cg00050482	NA	NA	chr16	73207213	73207214	CGI-S-Shore	FALSE	FALSE	TRUE	1.7292	-1.07864	0.746092	0.331785
cg00050692	1788	DNMT3A	chr2	25524877	25524878	CGI-N-Shore	FALSE	TRUE	FALSE	2.06531	1.3968	0.80266	0.713605
cg00051307	NA	NA	chr5	72524193	72524194	CGI-N-Shelf	FALSE	FALSE	TRUE	3.69708	2.94429	0.925542	0.878042
cg00051590	7407	VARS	chr6	31759486	31759487	CGI-N-Shelf	FALSE	TRUE	FALSE	3.89209	2.7524	0.934832	0.859924
cg00052246	27086	FOXP1	chr3	71106252	71106253	Non-CGI	FALSE	TRUE	FALSE	4.28451	2.93152	0.95047	0.852271
cg00052772	8705	B3GALT4	chr6	33245804	33245805	CGI	TRUE	FALSE	FALSE	3.39122	2.27001	0.909843	0.823221
cg00053063	344148	NCKAP5	chr2	134191960	134191961	Non-CGI	FALSE	TRUE	FALSE	3.98332	3.28148	0.940154	0.904089
cg00053851	NA	NA	chr1	226270442	226270443	CGI-N-Shore	TRUE	FALSE	FALSE	3.31198	2.21826	0.898837	0.812254
cg00053916	NA	NA	chr8	37457329	37457330	Non-CGI	FALSE	FALSE	TRUE	1.64423	-0.690883	0.75082	0.390093
cg00054774	25966	C2CD2	chr21	43373079	43373080	CGI-N-Shore	FALSE	TRUE	FALSE	0.664063	-0.834866	0.608342	0.374425
cg00055462	10160	FARP1	chr13	99023894	99023895	Non-CGI	FALSE	TRUE	FALSE	3.86472	2.98873	0.932331	0.874825
cg00055510	NA	NA	chr2	208907911	208907912	Non-CGI	FALSE	FALSE	TRUE	3.92436	3.1426	0.935648	0.881217
cg00057231	1294	COL7A1	chr3	48631958	48631959	CGI	FALSE	TRUE	FALSE	2.3479	1.38582	0.825426	0.714113
cg00057272	57623	ZFAT	chr8	135726252	135726253	CGI-S-Shore	TRUE	FALSE	FALSE	0.53675	-0.794023	0.585748	0.37398
cg00057476	10634	GAS2L1	chr22	29708246	29708247	CGI-S-Shore	FALSE	TRUE	FALSE	1.96637	0.471706	0.792147	0.57785
cg00057722	201501	ZBTB7C	chr18	45934156	45934157	CGI-N-Shore	FALSE	TRUE	FALSE	2.71206	1.26072	0.85758	0.680249
cg00057900	57670	KIAA1549	chr7	138553470	138553471	CGI-S-Shore	FALSE	TRUE	FALSE	3.95232	2.95806	0.938515	0.881599
cg00058009	7222	TRPC3	chr4	122853693	122853694	CGI	TRUE	TRUE	FALSE	1.68424	0.889836	0.757211	0.647165
cg00058291	NA	NA	chr1	228974133	228974134	Non-CGI	FALSE	FALSE	TRUE	3.79623	1.68798	0.928421	0.747108
cg00058887	56977	STOX2	chr4	184909018	184909019	CGI	FALSE	TRUE	FALSE	0.634137	-2.21521	0.589095	0.191963
cg00058923	126823	KLHDC9	chr1	161069167	161069168	CGI-S-Shore	TRUE	TRUE	FALSE	3.90188	2.90985	0.935765	0.880053
cg00059459	NA	NA	chr1	8343575	8343576	Non-CGI	FALSE	FALSE	TRUE	3.46569	1.38906	0.912704	0.711352
cg00059699	3824	KLRD1	chr12	10455788	10455789	Non-CGI	TRUE	FALSE	FALSE	3.39507	2.32297	0.909018	0.818534
cg00059930	5925	RB1	chr13	48894382	48894383	CGI	FALSE	TRUE	FALSE	3.18911	2.14742	0.893176	0.801935
cg00060649	NA	NA	chr12	67928800	67928801	Non-CGI	FALSE	TRUE	FALSE	-1.68705	-3.83076	0.266639	0.068072
cg00061264	7324	UBE2E1	chr3	23852775	23852776	CGI-S-Shore	FALSE	TRUE	FALSE	-0.268948	-1.45178	0.4557	0.277892
cg00061306	85302	FBF1	chr17	73933841	73933842	CGI-N-Shelf	TRUE	TRUE	FALSE	4.51601	3.10524	0.957541	0.883764
cg00061520	115	ADCY9	chr16	4070371	4070372	Non-CGI	FALSE	TRUE	FALSE	3.09712	2.34945	0.891026	0.826473
cg00061629	60529	ALX4	chr11	44325258	44325259	CGI	FALSE	TRUE	FALSE	3.71488	2.7349	0.923721	0.863838
cg00063006	NA	NA	chr6	32847530	32847531	CGI	FALSE	FALSE	TRUE	3.16251	2.32772	0.897675	0.821101
cg00063369	NA	NA	chr2	213811478	213811479	Non-CGI	FALSE	FALSE	TRUE	2.67591	1.98174	0.858355	0.781826
cg00063471	388121	TNFAIP8L3	chr15	51385970	51385971	CGI	FALSE	TRUE	FALSE	-1.57709	-2.34656	0.257419	0.167256
cg00063828	404550	C16orf74	chr16	85749496	85749497	Non-CGI	FALSE	TRUE	FALSE	0.892097	-0.774862	0.639081	0.378883
cg00063982	NA	NA	chr1	53040491	53040492	Non-CGI	FALSE	FALSE	TRUE	0.863035	-0.907763	0.637387	0.361331
cg00064255	400761	FLJ27354	chr1	90100012	90100013	CGI	TRUE	TRUE	FALSE	0.254494	-0.917397	0.541343	0.355439
cg00064255	84230	LRRC8C	chr1	90100012	90100013	CGI	TRUE	TRUE	FALSE	0.254494	-0.917397	0.541343	0.355439
cg00066270	100873775	RNU6-72P	chr1	186265270	186265271	Non-CGI	TRUE	TRUE	FALSE	-0.624753	-1.57341	0.395037	0.257028
cg00066270	10216	PRG4	chr1	186265270	186265271	Non-CGI	TRUE	TRUE	FALSE	-0.624753	-1.57341	0.395037	0.257028
cg00066270	100302192	MIR548F1	chr1	186265270	186265271	Non-CGI	TRUE	TRUE	FALSE	-0.624753	-1.57341	0.395037	0.257028
cg00066750	23493	HEY2	chr6	126080132	126080133	CGI-N-Shore	FALSE	TRUE	FALSE	2.38093	1.19812	0.833924	0.68517
cg00067720	5295	PIK3R1	chr5	67521141	67521142	Non-CGI	FALSE	TRUE	FALSE	1.84823	-0.479078	0.775039	0.426398
cg00067758	NA	NA	chr6	92185790	92185791	Non-CGI	FALSE	FALSE	TRUE	0.762706	-0.47639	0.625032	0.420589
cg00068428	NA	NA	chr8	49494724	49494725	CGI	FALSE	FALSE	TRUE	-1.6678	-2.4374	0.245119	0.158429
cg00068433	128272	ARHGEF19	chr1	16540130	16540131	CGI-N-Shelf	TRUE	FALSE	FALSE	2.4201	1.5834	0.838618	0.747878
cg00068810	25849	PARM1	chr4	75857963	75857964	CGI-N-Shore	TRUE	FALSE	FALSE	-1.70336	-2.58188	0.247099	0.154089
cg00070181	100508120	GMDS-AS1	chr6	2467820	2467821	Non-CGI	FALSE	TRUE	FALSE	3.17277	2.14146	0.894652	0.785627
cg00070460	1487	CTBP1	chr4	1227676	1227677	CGI	FALSE	TRUE	FALSE	3.34744	2.3969	0.909035	0.834829
cg00071381	51179	HAO2	chr1	119910574	119910575	Non-CGI	TRUE	FALSE	FALSE	4.40258	3.66705	0.954402	0.919077
cg00073244	1953	MEGF6	chr1	3529108	3529109	CGI-S-Shore	TRUE	FALSE	FALSE	1.70695	0.895062	0.763225	0.646344
cg00073460	340152	ZC3H12D	chr6	149806502	149806503	CGI-S-Shelf	TRUE	FALSE	FALSE	2.07151	-1.17225	0.793932	0.321502
cg00073650	2588	GALNS	chr16	88922166	88922167	CGI-N-Shore	TRUE	TRUE	FALSE	1.68384	0.999565	0.757415	0.661352
cg00073650	51693	TRAPPC2L	chr16	88922166	88922167	CGI-N-Shore	TRUE	TRUE	FALSE	1.68384	0.999565	0.757415	0.661352
cg00073794	238	ALK	chr2	30041338	30041339	Non-CGI	FALSE	TRUE	FALSE	3.06993	1.30139	0.886119	0.683688
cg00074365	7360	UGP2	chr2	64088479	64088480	Non-CGI	FALSE	TRUE	FALSE	1.12497	-0.115107	0.67809	0.480442
cg00074818	137075	CLDN23	chr8	8560427	8560428	CGI	TRUE	FALSE	FALSE	2.23223	0.543452	0.810656	0.585449
cg00075467	9014	TAF1B	chr2	9983094	9983095	CGI-N-Shore	TRUE	FALSE	FALSE	0.920293	0.207303	0.65178	0.53439
cg00076538	133584	EGFLAM	chr5	38257555	38257556	CGI	TRUE	FALSE	FALSE	-0.439545	-1.51507	0.426033	0.267543
cg00076797	643160	CYMP	chr1	111022914	111022915	Non-CGI	TRUE	TRUE	FALSE	1.98905	1.24651	0.792986	0.69867
cg00077477	NA	NA	chr5	159305492	159305493	Non-CGI	FALSE	FALSE	TRUE	4.63759	2.56975	0.960713	0.827842
cg00077877	50807	ASAP1	chr8	131414474	131414475	Non-CGI	FALSE	TRUE	FALSE	2.52891	1.89371	0.842174	0.782133
cg00078025	80709	AKNA	chr9	117159975	117159976	CGI-N-Shore	FALSE	TRUE	FALSE	-0.700861	-1.52415	0.384937	0.264517
cg00078259	NA	NA	chr6	2656232	2656233	Non-CGI	FALSE	FALSE	TRUE	4.01193	3.37414	0.939903	0.904438
cg00078348	3359	HTR3A	chr11	113845487	113845488	Non-CGI	TRUE	FALSE	FALSE	0.604951	-0.68091	0.600269	0.395137
cg00079056	27290	SPINK4	chr9	33239641	33239642	Non-CGI	TRUE	FALSE	FALSE	3.95179	3.1392	0.937695	0.886979
cg00080081	91607	SLFN11	chr17	33701776	33701777	CGI-S-Shore	TRUE	FALSE	FALSE	0.70245	-0.998015	0.606339	0.335917
cg00081324	201191	SAMD14	chr17	48201233	48201234	Non-CGI	FALSE	TRUE	FALSE	-0.10261	-0.911721	0.482334	0.35296
cg00081799	11332	ACOT7	chr1	6390793	6390794	Non-CGI	FALSE	TRUE	FALSE	3.04573	1.03197	0.887381	0.648389
cg00082140	NA	NA	chr5	179816766	179816767	CGI	FALSE	FALSE	TRUE	1.15295	-0.587432	0.68319	0.417491
cg00082664	6423	SFRP2	chr4	154710796	154710797	CGI	TRUE	FALSE	FALSE	-1.30525	-2.4024	0.299184	0.164234
cg00084347	196385	DNAH10	chr12	124393913	124393914	CGI	FALSE	TRUE	FALSE	1.90129	1.04041	0.776931	0.669477
cg00084432	23111	SPG20	chr13	36944471	36944472	Non-CGI	TRUE	FALSE	FALSE	3.76992	1.6892	0.930489	0.745531
cg00085199	83696	TRAPPC9	chr8	141106596	141106597	CGI-N-Shore	FALSE	TRUE	FALSE	2.1255	1.28375	0.807766	0.704236
cg00085370	NA	NA	chr5	1855960	1855961	CGI	FALSE	FALSE	TRUE	-0.324375	-1.23824	0.4458	0.309668
cg00085438	4154	MBNL1	chr3	152049980	152049981	Non-CGI	FALSE	TRUE	FALSE	0.074233	-1.13409	0.511729	0.319861
cg00085493	NA	NA	chr1	208040203	208040204	CGI-N-Shore	FALSE	TRUE	FALSE	2.5351	-0.515499	0.843542	0.423822
cg00085732	9058	SLC13A2	chr17	26800820	26800821	Non-CGI	TRUE	FALSE	FALSE	0.744519	0.0939939	0.624119	0.516023
cg00085790	NA	NA	chr1	211722100	211722101	Non-CGI	FALSE	FALSE	TRUE	2.54355	1.45341	0.85003	0.728237
cg00086243	8784	TNFRSF18	chr1	1142405	1142406	CGI-S-Shore	TRUE	FALSE	FALSE	-0.0296823	-0.811489	0.494014	0.378316
cg00086283	NA	NA	chr7	158409247	158409248	Non-CGI	FALSE	FALSE	TRUE	2.17464	1.54928	0.811906	0.736776
cg00086710	152926	PPM1K	chr4	89204074	89204075	CGI-N-Shore	FALSE	TRUE	FALSE	0.738066	-0.782107	0.619418	0.372643
cg00087274	84561	SLC12A8	chr3	124856760	124856761	CGI-N-Shelf	FALSE	TRUE	FALSE	2.65335	-0.638423	0.859723	0.407701
cg00087546	63976	PRDM16	chr1	3308286	3308287	CGI	FALSE	TRUE	FALSE	4.12684	3.38963	0.945253	0.909242
cg00087645	NA	NA	chr6	157040279	157040280	CGI-N-Shore	FALSE	FALSE	TRUE	3.61781	2.99139	0.919413	0.879863
cg00087792	NA	NA	chr16	4000986	4000987	CGI-S-Shore	FALSE	FALSE	TRUE	2.62988	-0.530459	0.841628	0.421987
cg00088797	9922	IQSEC1	chr3	12976288	12976289	CGI-N-Shore	FALSE	TRUE	FALSE	0.980395	-0.450759	0.657681	0.421531
cg00089100	8459	TPST2	chr22	26922951	26922952	Non-CGI	FALSE	TRUE	FALSE	3.13889	2.0962	0.894762	0.802909
cg00090431	NA	NA	chr2	241853101	241853102	CGI-S-Shore	FALSE	FALSE	TRUE	2.77427	2.05883	0.867655	0.795105
cg00090764	79906	MORN1	chr1	2259065	2259066	CGI-S-Shore	FALSE	TRUE	FALSE	3.20683	1.85362	0.901095	0.764064
cg00091064	NA	NA	chr6	41376604	41376605	CGI	FALSE	FALSE	TRUE	4.06902	2.25293	0.943182	0.783644
cg00091302	NA	NA	chr1	182602986	182602987	Non-CGI	FALSE	FALSE	TRUE	3.51255	2.16372	0.915201	0.795738
cg00091693	54474	KRT20	chr17	39041602	39041603	CGI-S-Shore	TRUE	FALSE	FALSE	2.8889	2.26346	0.875206	0.825122
cg00092400	9498	SLC4A8	chr12	51788285	51788286	CGI-S-Shore	FALSE	TRUE	FALSE	1.33906	0.0756089	0.708122	0.51174
cg00092992	NA	NA	chr1	33596100	33596101	CGI-S-Shelf	FALSE	FALSE	TRUE	0.756555	-0.231952	0.621733	0.467668
cg00093099	84034	EMILIN2	chr18	2849071	2849072	CGI-S-Shore	FALSE	TRUE	FALSE	2.03382	1.00494	0.795555	0.643355
cg00093643	113201	CASC4	chr15	44579510	44579511	CGI-N-Shore	TRUE	FALSE	FALSE	2.22022	0.926909	0.80919	0.642727
cg00093956	80298	MTERFD3	chr12	107372431	107372432	Non-CGI	TRUE	TRUE	FALSE	4.16411	3.53678	0.946453	0.916107
cg00094244	728637	LOC728637	chr5	131280217	131280218	CGI-N-Shore	FALSE	TRUE	FALSE	1.91095	1.09662	0.779676	0.673358
cg00094244	23305	ACSL6	chr5	131280217	131280218	CGI-N-Shore	FALSE	TRUE	FALSE	1.91095	1.09662	0.779676	0.673358
cg00094595	NA	NA	chr12	91775374	91775375	Non-CGI	FALSE	FALSE	TRUE	-1.07408	-1.80002	0.327218	0.225966
cg00094898	NA	NA	chr16	55365950	55365951	CGI	FALSE	FALSE	TRUE	0.8064	0.0276954	0.632777	0.505542
cg00094913	2814	GP5	chr3	194120949	194120950	CGI-S-Shore	TRUE	FALSE	FALSE	1.32934	0.534412	0.705341	0.587021
cg00095526	779	CACNA1S	chr1	201081686	201081687	CGI-N-Shore	TRUE	FALSE	FALSE	1.09098	0.290188	0.672879	0.546959
cg00095772	54221	SNTG2	chr2	1050773	1050774	CGI-N-Shore	FALSE	TRUE	FALSE	2.48881	1.57571	0.844754	0.745103
cg00096106	7903	ST8SIA4	chr5	100176809	100176810	Non-CGI	FALSE	TRUE	FALSE	2.41573	1.43621	0.838444	0.725253
cg00096328	NA	NA	chr3	41200046	41200047	Non-CGI	FALSE	FALSE	TRUE	2.09328	1.03644	0.801171	0.654635
cg00096418	NA	NA	chr16	65910068	65910069	Non-CGI	FALSE	FALSE	TRUE	3.88718	0.617007	0.933425	0.58914
cg00096810	9509	ADAMTS2	chr5	178753432	178753433	CGI	FALSE	TRUE	FALSE	0.562909	-1.29551	0.594647	0.299051
cg00096956	26064	RAI14	chr5	34691477	34691478	Non-CGI	FALSE	TRUE	FALSE	2.86587	0.4233	0.863782	0.559719
cg00097144	5981	RFC1	chr4	39321307	39321308	Non-CGI	FALSE	TRUE	FALSE	2.73109	1.96188	0.862361	0.787147
cg00097550	NA	NA	chr22	38821039	38821040	CGI-N-Shore	FALSE	FALSE	TRUE	3.29607	2.58344	0.905151	0.848276
cg00099393	5799	PTPRN2	chr7	157361621	157361622	CGI	FALSE	TRUE	FALSE	-1.23299	-2.55882	0.309442	0.146153
cg00099427	25790	CCDC19	chr1	159870134	159870135	CGI	TRUE	FALSE	FALSE	0.658847	-0.854827	0.610206	0.364117
cg00099766	58528	RRAGD	chr6	90120705	90120706	CGI-N-Shore	FALSE	TRUE	FALSE	1.65702	-0.641406	0.747265	0.401178
cg00099835	26504	CNNM4	chr2	97427033	97427034	CGI	TRUE	FALSE	FALSE	-1.74202	-2.85537	0.241605	0.128315
cg00100804	11064	CNTRL	chr9	123836087	123836088	CGI-N-Shore	TRUE	FALSE	FALSE	2.37709	1.46024	0.823004	0.713451
cg00101154	10573	MRPL28	chr16	420108	420109	CGI	FALSE	TRUE	FALSE	-0.95561	-1.66488	0.346678	0.249136
cg00101350	4248	MGAT3	chr22	39883192	39883193	CGI-N-Shore	TRUE	TRUE	FALSE	2.1786	0.494723	0.812511	0.576762
cg00101728	5269	SERPINB6	chr6	2953027	2953028	CGI	FALSE	TRUE	FALSE	-0.352451	-1.34241	0.441359	0.298342
cg00101940	NA	NA	chr16	85479301	85479302	CGI-S-Shore	FALSE	FALSE	TRUE	1.76817	1.03738	0.768044	0.66752
cg00102093	NA	NA	chr1	232345923	232345924	Non-CGI	FALSE	FALSE	TRUE	1.09631	-0.345868	0.676673	0.445848
cg00102731	57593	EBF4	chr20	2729245	2729246	CGI-N-Shore	FALSE	TRUE	FALSE	2.14246	0.0347454	0.808222	0.506496
cg00103448	NA	NA	chr17	46600533	46600534	CGI-N-Shelf	FALSE	FALSE	TRUE	3.02001	0.547804	0.877311	0.58693
cg00103785	1944	EFNA3	chr1	155043322	155043323	CGI	FALSE	TRUE	FALSE	-1.22229	-1.87648	0.30526	0.218776
cg00104072	NA	NA	chr6	85487766	85487767	CGI-S-Shelf	FALSE	FALSE	TRUE	-0.244952	-2.11506	0.463927	0.189456
cg00104167	NA	NA	chr16	86953195	86953196	CGI	FALSE	FALSE	TRUE	1.66298	0.0156271	0.753451	0.501407
cg00105102	79957	PAQR6	chr1	156217178	156217179	CGI-S-Shore	FALSE	TRUE	FALSE	0.284175	-0.769754	0.54882	0.376341
cg00106345	100506311	HOTAIRM1	chr7	27138396	27138397	CGI	FALSE	TRUE	FALSE	0.546856	-0.20878	0.587606	0.468666
cg00106808	NA	NA	chr2	3045057	3045058	CGI	FALSE	TRUE	FALSE	1.05008	0.383278	0.670741	0.561398
cg00107629	8525	DGKZ	chr11	46389307	46389308	CGI	FALSE	TRUE	FALSE	-1.02703	-1.80744	0.330221	0.224904
cg00108038	100292680	LINC00942	chr12	1609245	1609246	CGI-S-Shore	TRUE	FALSE	FALSE	3.6655	1.19238	0.918517	0.671594
cg00108282	NA	NA	chr7	845047	845048	CGI	FALSE	FALSE	TRUE	2.16335	0.516405	0.805543	0.584518
cg00108694	NA	NA	chr5	55598438	55598439	Non-CGI	FALSE	FALSE	TRUE	4.21703	3.36875	0.948226	0.905866
cg00109293	63976	PRDM16	chr1	3149830	3149831	CGI-S-Shore	FALSE	TRUE	FALSE	3.21031	2.37625	0.89599	0.82974
cg00109923	79034	C7orf26	chr7	6631520	6631521	CGI-S-Shore	FALSE	TRUE	FALSE	3.68573	2.84675	0.926248	0.864231
cg00110654	NA	NA	chr6	10385489	10385490	CGI	FALSE	FALSE	TRUE	-1.92193	-2.70282	0.216746	0.136016
cg00110832	80863	PRRT1	chr6	32121130	32121131	CGI	TRUE	TRUE	FALSE	-0.735363	-1.96906	0.379221	0.205311
cg00110832	100532746	PPT2-EGFL8	chr6	32121130	32121131	CGI	TRUE	TRUE	FALSE	-0.735363	-1.96906	0.379221	0.205311
cg00110832	9374	PPT2	chr6	32121130	32121131	CGI	TRUE	TRUE	FALSE	-0.735363	-1.96906	0.379221	0.205311
cg00110832	100507547	LOC100507547	chr6	32121130	32121131	CGI	TRUE	TRUE	FALSE	-0.735363	-1.96906	0.379221	0.205311
cg00110917	NA	NA	chr7	68000401	68000402	CGI	FALSE	FALSE	TRUE	2.79771	1.70954	0.868674	0.752195
cg00112238	23648	SSBP3	chr1	54719938	54719939	CGI-N-Shelf	FALSE	TRUE	FALSE	1.26917	0.0957758	0.70425	0.516412
cg00112493	84570	COL25A1	chr4	110224951	110224952	CGI-S-Shore	TRUE	FALSE	FALSE	1.94435	0.805982	0.783364	0.631026
cg00112798	NA	NA	chr16	87619963	87619964	CGI	FALSE	FALSE	TRUE	3.84465	3.18867	0.93376	0.888219
cg00113369	440556	LINC00982	chr1	2977861	2977862	CGI-N-Shore	FALSE	TRUE	FALSE	2.08579	0.617495	0.80455	0.60326
cg00115149	100505933	ADD3-AS1	chr10	111735487	111735488	Non-CGI	FALSE	TRUE	FALSE	4.0231	2.92534	0.939856	0.876323
cg00115288	64787	EPS8L2	chr11	705892	705893	CGI	TRUE	FALSE	FALSE	0.344302	-0.866092	0.558727	0.357304
cg00115639	NA	NA	chr17	54701692	54701693	Non-CGI	FALSE	FALSE	TRUE	1.73645	0.558713	0.762891	0.592208
cg00116092	2104	ESRRG	chr1	217313044	217313045	CGI	TRUE	FALSE	FALSE	-0.503556	-1.37472	0.416467	0.284099
cg00116234	92949	ADAMTSL1	chr9	18474243	18474244	Non-CGI	TRUE	FALSE	FALSE	-0.816939	-1.77262	0.374455	0.247002
cg00117005	1616	DAXX	chr6	33288995	33288996	CGI-S-Shore	FALSE	TRUE	FALSE	1.85021	0.024328	0.780138	0.515728
cg00117018	90987	ZNF251	chr8	145955983	145955984	CGI	FALSE	TRUE	FALSE	1.22609	0.476222	0.691911	0.578832
cg00117172	864	RUNX3	chr1	25255838	25255839	CGI	FALSE	TRUE	FALSE	1.97199	0.000239921	0.770338	0.501319
cg00117237	NA	NA	chr8	67318804	67318805	Non-CGI	FALSE	FALSE	TRUE	2.84463	1.40763	0.875021	0.718781
cg00117599	NA	NA	chr17	45962589	45962590	Non-CGI	FALSE	FALSE	TRUE	0.413865	-0.455935	0.56739	0.424958
cg00118229	5152	PDE9A	chr21	44088420	44088421	CGI-S-Shore	FALSE	TRUE	FALSE	2.0317	1.34822	0.799031	0.710986
cg00118783	NA	NA	chr16	1069760	1069761	CGI	FALSE	FALSE	TRUE	1.61054	-1.29891	0.74274	0.317968
cg00119073	339929	LPP-AS2	chr3	187870713	187870714	CGI-N-Shore	TRUE	FALSE	FALSE	-0.0125864	-0.999971	0.497176	0.337236
cg00119073	4026	LPP	chr3	187870713	187870714	CGI-N-Shore	TRUE	FALSE	FALSE	-0.0125864	-0.999971	0.497176	0.337236
cg00119241	23254	KAZN	chr1	15152595	15152596	Non-CGI	FALSE	TRUE	FALSE	3.59824	1.65247	0.920169	0.729499
cg00119279	NA	NA	chr4	174427146	174427147	CGI-N-Shore	FALSE	FALSE	TRUE	2.50718	0.571002	0.845431	0.593484
cg00119460	NA	NA	chr6	30923743	30923744	CGI	FALSE	FALSE	TRUE	1.03721	-0.472287	0.665647	0.422523
cg00119811	64283	ARHGEF28	chr5	73092353	73092354	Non-CGI	FALSE	TRUE	FALSE	-0.459257	-1.53426	0.427636	0.269618
cg00120473	57537	SORCS2	chr4	7330616	7330617	Non-CGI	FALSE	TRUE	FALSE	1.40051	0.522335	0.71109	0.584517
cg00120825	5192	PEX10	chr1	2338738	2338739	CGI-S-Shore	FALSE	TRUE	FALSE	3.25479	2.61689	0.902101	0.850358
cg00121135	863	CBFA2T3	chr16	88991343	88991344	CGI	FALSE	TRUE	FALSE	-0.192311	-0.827559	0.46733	0.363929
cg00121339	23274	CLEC16A	chr16	11127037	11127038	Non-CGI	FALSE	TRUE	FALSE	2.43961	-0.290199	0.834142	0.463623
cg00122679	119587	CPXM2	chr10	125673028	125673029	Non-CGI	FALSE	TRUE	FALSE	3.79737	2.3638	0.929975	0.82448
cg00123090	100506795	LOC100506795	chr1	234667087	234667088	CGI	FALSE	TRUE	FALSE	2.69674	-0.507036	0.861424	0.421416
cg00123104	22883	CLSTN1	chr1	9884732	9884733	CGI	TRUE	FALSE	FALSE	-1.07822	-1.77037	0.324736	0.229236
cg00124009	23612	PHLDA3	chr1	201439578	201439579	CGI-S-Shore	TRUE	FALSE	FALSE	4.2515	3.47236	0.948657	0.915993
cg00124133	NA	NA	chr15	89476436	89476437	Non-CGI	FALSE	FALSE	TRUE	2.31923	0.644141	0.824811	0.597954
cg00124920	84066	TEX35	chr1	178515751	178515752	CGI-S-Shelf	FALSE	TRUE	FALSE	3.2149	2.48116	0.901931	0.83532
cg00124920	400798	C1orf220	chr1	178515751	178515752	CGI-S-Shelf	FALSE	TRUE	FALSE	3.2149	2.48116	0.901931	0.83532
cg00125048	114787	GPRIN1	chr5	176023439	176023440	CGI	FALSE	TRUE	FALSE	3.54466	2.80208	0.918974	0.86231
cg00126148	NA	NA	chr4	111533517	111533518	CGI	FALSE	FALSE	TRUE	4.32514	-2.05618	0.950016	0.204306
cg00126498	80329	ULBP1	chr6	150286838	150286839	CGI-S-Shore	FALSE	TRUE	FALSE	2.47268	1.75113	0.841752	0.756051
cg00126889	NA	NA	chr8	42103037	42103038	Non-CGI	FALSE	FALSE	TRUE	4.19408	3.14318	0.947006	0.874659
cg00126946	9644	SH3PXD2A	chr10	105363258	105363259	CGI	FALSE	TRUE	FALSE	2.98994	2.3783	0.883471	0.829767
cg00127353	NA	NA	chr6	112210969	112210970	Non-CGI	FALSE	FALSE	TRUE	1.77799	0.0759012	0.764666	0.51588
cg00128100	11270	NRM	chr6	30656094	30656095	CGI-S-Shore	TRUE	TRUE	FALSE	2.82046	0.959676	0.869221	0.644992
cg00128100	170954	PPP1R18	chr6	30656094	30656095	CGI-S-Shore	TRUE	TRUE	FALSE	2.82046	0.959676	0.869221	0.644992
cg00128812	724031	MIR661	chr8	145019377	145019378	CGI-S-Shore	TRUE	TRUE	FALSE	4.20874	3.01691	0.948281	0.878827
cg00128812	5339	PLEC	chr8	145019377	145019378	CGI-S-Shore	TRUE	TRUE	FALSE	4.20874	3.01691	0.948281	0.878827
cg00129785	NA	NA	chr21	47455453	47455454	CGI	FALSE	FALSE	TRUE	3.46365	2.5429	0.912103	0.846491
cg00129811	29940	DSE	chr6	116726398	116726399	Non-CGI	FALSE	TRUE	FALSE	0.516052	-1.4268	0.585208	0.276321
cg00130693	29920	PYCR2	chr1	226110727	226110728	CGI-N-Shore	TRUE	TRUE	FALSE	2.2966	1.5474	0.825493	0.735127
cg00130693	10637	LEFTY1	chr1	226110727	226110728	CGI-N-Shore	TRUE	TRUE	FALSE	2.2966	1.5474	0.825493	0.735127
cg00130819	NA	NA	chr16	84828829	84828830	CGI-S-Shore	FALSE	FALSE	TRUE	3.01154	1.59909	0.87076	0.735098
cg00132888	NA	NA	chr13	26599785	26599786	Non-CGI	FALSE	FALSE	TRUE	3.38362	2.53062	0.909083	0.841398
cg00135293	2898	GRIK2	chr6	102088363	102088364	Non-CGI	FALSE	TRUE	FALSE	2.49923	1.22246	0.836703	0.695437
cg00135399	60312	AFAP1	chr4	7783873	7783874	Non-CGI	FALSE	TRUE	FALSE	3.18769	2.35721	0.896784	0.829729
cg00136547	667	DST	chr6	56507796	56507797	Non-CGI	TRUE	TRUE	FALSE	-1.45387	-2.21183	0.277957	0.178602
cg00137750	NA	NA	chr3	151218968	151218969	Non-CGI	FALSE	FALSE	TRUE	3.5964	2.82017	0.921151	0.871168
cg00137840	NA	NA	chr4	124301236	124301237	Non-CGI	FALSE	FALSE	TRUE	2.55891	1.08686	0.847819	0.656443
cg00138101	3090	HIC1	chr17	1961109	1961110	CGI	TRUE	TRUE	FALSE	1.61582	0.346964	0.748585	0.563684
cg00138126	56937	PMEPA1	chr20	56286697	56286698	CGI-S-Shore	TRUE	FALSE	FALSE	2.79288	1.82047	0.870007	0.756704
cg00138710	NA	NA	chr2	906974	906975	CGI-S-Shore	FALSE	FALSE	TRUE	2.90791	2.27456	0.876629	0.82482
cg00139681	NA	NA	chr7	106125168	106125169	Non-CGI	FALSE	FALSE	TRUE	0.6526	-0.616337	0.609477	0.401232
cg00139683	51378	ANGPT4	chr20	896564	896565	Non-CGI	TRUE	FALSE	FALSE	2.96718	2.0298	0.885543	0.79578
cg00142670	221424	LRRC73	chr6	43478496	43478497	CGI	TRUE	FALSE	FALSE	-1.71116	-2.65401	0.237931	0.141223
cg00142925	335	APOA1	chr11	116706562	116706563	CGI	FALSE	TRUE	FALSE	-1.87014	-2.61651	0.216366	0.14093
cg00143809	23654	PLXNB2	chr22	50720552	50720553	CGI	TRUE	TRUE	FALSE	2.79726	2.15612	0.871349	0.805745
cg00145118	10007	GNPDA1	chr5	141393931	141393932	CGI-S-Shore	TRUE	FALSE	FALSE	-1.65243	-2.57433	0.249693	0.144858
cg00145141	124975	GGT6	chr17	4464022	4464023	Non-CGI	TRUE	FALSE	FALSE	3.01742	2.17073	0.888574	0.809798
cg00145352	79066	METTL16	chr17	2319906	2319907	CGI-S-Shore	TRUE	TRUE	FALSE	3.86098	2.49601	0.93331	0.82455
cg00145352	284009	LOC284009	chr17	2319906	2319907	CGI-S-Shore	TRUE	TRUE	FALSE	3.86098	2.49601	0.93331	0.82455
cg00145732	NA	NA	chr16	1095673	1095674	CGI	FALSE	FALSE	TRUE	-0.440196	-1.89253	0.429209	0.221998
cg00145875	NA	NA	chr2	11104394	11104395	CGI-S-Shelf	FALSE	FALSE	TRUE	0.642855	-0.775604	0.607901	0.376919
cg00145911	148398	SAMD11	chr1	867938	867939	CGI-N-Shore	FALSE	TRUE	FALSE	3.87826	3.10467	0.935017	0.891343
cg00146004	NA	NA	chr16	3241434	3241435	CGI	TRUE	FALSE	FALSE	-1.52513	-2.35577	0.269602	0.167543
cg00146864	9020	MAP3K14	chr17	43392332	43392333	CGI-N-Shore	FALSE	TRUE	FALSE	3.5415	0.764358	0.917785	0.613486
cg00147638	864	RUNX3	chr1	25228039	25228040	CGI-N-Shore	TRUE	TRUE	FALSE	3.85079	2.28645	0.93396	0.80845
cg00147943	55970	GNG12	chr1	68225713	68225714	Non-CGI	FALSE	TRUE	FALSE	2.97826	2.10634	0.882309	0.795454
cg00148114	NA	NA	chr7	5468197	5468198	CGI	FALSE	FALSE	TRUE	0.565199	-1.08297	0.594673	0.330939
cg00148825	NA	NA	chr4	124427195	124427196	CGI	FALSE	FALSE	TRUE	-1.12955	-2.2001	0.319838	0.181101
cg00148862	54221	SNTG2	chr2	1286394	1286395	CGI-N-Shore	FALSE	TRUE	FALSE	1.30363	0.556451	0.697207	0.592666
cg00149455	NA	NA	chr10	134332383	134332384	CGI	TRUE	FALSE	FALSE	2.88091	1.84441	0.870313	0.774672
cg00149537	80176	SPSB1	chr1	9409810	9409811	CGI-S-Shore	FALSE	TRUE	FALSE	4.113	-0.000722929	0.944068	0.491342
cg00150080	NA	NA	chr7	1447841	1447842	CGI	FALSE	FALSE	TRUE	0.894245	-0.836578	0.644499	0.372479
cg00150774	NA	NA	chr1	219438274	219438275	Non-CGI	FALSE	FALSE	TRUE	3.11395	1.72959	0.889414	0.757488
cg00151370	6310	ATXN1	chr6	16323285	16323286	CGI-N-Shelf	FALSE	TRUE	FALSE	4.03045	2.46652	0.941534	0.819019
cg00151709	NA	NA	chr1	29101952	29101953	CGI	FALSE	FALSE	TRUE	-1.38755	-2.25894	0.282	0.174208
cg00151728	NA	NA	chr3	169478456	169478457	CGI-N-Shelf	FALSE	FALSE	TRUE	2.15001	0.503872	0.811601	0.578608
cg00151768	4772	NFATC1	chr18	77157760	77157761	CGI	FALSE	TRUE	FALSE	3.84172	2.28529	0.919955	0.79455
cg00152259	79922	MRM1	chr17	34957477	34957478	CGI-N-Shore	TRUE	FALSE	FALSE	-0.425445	-1.31451	0.427871	0.287925
cg00152322	NA	NA	chr15	65198005	65198006	CGI	FALSE	FALSE	TRUE	-1.1101	-1.97842	0.321575	0.205293
cg00152878	63976	PRDM16	chr1	3209519	3209520	CGI	FALSE	TRUE	FALSE	4.19345	3.2886	0.94415	0.896271
cg00152946	NA	NA	chr10	130338781	130338782	CGI	FALSE	FALSE	TRUE	-0.750921	-1.43562	0.375221	0.272647
cg00154357	84107	ZIC4	chr3	147111280	147111281	CGI	TRUE	TRUE	FALSE	-0.128523	-0.992889	0.478784	0.34728
cg00154846	199990	C1orf86	chr1	2130580	2130581	Non-CGI	FALSE	TRUE	FALSE	1.14631	-0.526569	0.682703	0.416457
cg00154957	343263	MYBPHL	chr1	109850562	109850563	Non-CGI	TRUE	FALSE	FALSE	4.40025	3.13351	0.954021	0.891246
cg00154986	145873	MESP2	chr15	90320609	90320610	CGI-S-Shore	FALSE	TRUE	FALSE	3.94995	2.99183	0.938545	0.876079
cg00155345	NA	NA	chr6	89852017	89852018	CGI-N-Shelf	FALSE	FALSE	TRUE	3.80936	3.16041	0.93053	0.894121
cg00155535	NA	NA	chr12	132671473	132671474	CGI	FALSE	FALSE	TRUE	2.71805	1.66924	0.859984	0.746902
cg00155619	7923	HSD17B8	chr6	33173278	33173279	CGI-S-Shore	FALSE	TRUE	FALSE	0.721627	-0.0693626	0.619269	0.49023
cg00156118	83439	TCF7L1	chr2	85473750	85473751	Non-CGI	FALSE	TRUE	FALSE	2.09173	-1.04895	0.801775	0.346585
cg00156427	100499227	USP2-AS1	chr11	119294322	119294323	CGI-S-Shore	TRUE	TRUE	FALSE	-0.394642	-1.71145	0.437681	0.24192
cg00156427	7070	THY1	chr11	119294322	119294323	CGI-S-Shore	TRUE	TRUE	FALSE	-0.394642	-1.71145	0.437681	0.24192
cg00156551	9639	ARHGEF10	chr8	1780324	1780325	CGI	FALSE	TRUE	FALSE	1.90862	0.923081	0.780972	0.640825
cg00156995	646982	LINC00598	chr13	41055588	41055589	CGI-S-Shore	TRUE	TRUE	FALSE	1.9812	1.29665	0.791726	0.696444
cg00156995	2308	FOXO1	chr13	41055588	41055589	CGI-S-Shore	TRUE	TRUE	FALSE	1.9812	1.29665	0.791726	0.696444
cg00157016	375189	PFN4	chr2	24344064	24344065	CGI-N-Shore	FALSE	TRUE	FALSE	2.50532	0.322998	0.844516	0.546787
cg00157016	375190	FAM228B	chr2	24344064	24344065	CGI-N-Shore	FALSE	TRUE	FALSE	2.50532	0.322998	0.844516	0.546787
cg00157179	NA	NA	chr1	2383687	2383688	CGI-S-Shelf	FALSE	FALSE	TRUE	0.371285	-0.338732	0.563364	0.444677
cg00157638	NA	NA	chr1	10963932	10963933	Non-CGI	FALSE	FALSE	TRUE	0.821709	0.0450765	0.629215	0.506875
cg00157962	284611	FAM102B	chr1	109102212	109102213	CGI-N-Shore	TRUE	FALSE	FALSE	3.90845	2.89527	0.935404	0.865952
cg00158308	27199	OXGR1	chr13	97646341	97646342	CGI-N-Shore	FALSE	TRUE	FALSE	-1.77672	-2.51806	0.23409	0.150272
cg00160002	116987	AGAP1	chr2	237032579	237032580	CGI-N-Shore	FALSE	TRUE	FALSE	5.33195	4.54085	0.975211	0.955228
cg00160440	57575	PCDH10	chr4	134077575	134077576	CGI-S-Shelf	FALSE	TRUE	FALSE	3.32052	2.53265	0.900086	0.844407
cg00160478	NA	NA	chr2	20739356	20739357	Non-CGI	FALSE	FALSE	TRUE	2.67235	0.98381	0.861725	0.655892
cg00160583	1307	COL16A1	chr1	32167512	32167513	CGI-N-Shelf	FALSE	TRUE	FALSE	-0.0770542	-1.111	0.486506	0.321966
cg00160667	10076	PTPRU	chr1	29587357	29587358	CGI	FALSE	TRUE	FALSE	4.94911	4.10801	0.968082	0.938106
cg00162806	27287	VENTX	chr10	135051929	135051930	CGI	FALSE	TRUE	FALSE	-0.00274002	-0.829498	0.49903	0.363215
cg00163089	NA	NA	chr1	184616329	184616330	Non-CGI	FALSE	FALSE	TRUE	3.25907	1.89115	0.903577	0.770461
cg00163549	8705	B3GALT4	chr6	33246185	33246186	CGI-S-Shore	TRUE	FALSE	FALSE	1.00869	-0.177532	0.664843	0.470454
cg00164282	4642	MYO1D	chr17	30830732	30830733	Non-CGI	FALSE	TRUE	FALSE	2.38372	1.7476	0.831734	0.75861
cg00166868	9759	HDAC4	chr2	240001910	240001911	CGI	FALSE	TRUE	FALSE	3.37431	2.74946	0.911218	0.860413
cg00167670	NA	NA	chr4	13922944	13922945	Non-CGI	FALSE	TRUE	FALSE	0.678578	-1.36938	0.606529	0.285204
cg00167684	197258	FUK	chr16	70505196	70505197	Non-CGI	TRUE	TRUE	FALSE	4.10071	3.47057	0.944306	0.90904
cg00167958	NA	NA	chr22	42677969	42677970	CGI-N-Shore	FALSE	FALSE	TRUE	2.16518	1.53263	0.815026	0.739135
cg00168240	63976	PRDM16	chr1	3347457	3347458	CGI	FALSE	TRUE	FALSE	3.90399	2.93193	0.936025	0.881017
cg00168634	NA	NA	chr4	154572830	154572831	Non-CGI	FALSE	FALSE	TRUE	2.59906	1.66647	0.840412	0.745616
cg00168694	2114	ETS2	chr21	40193056	40193057	CGI-N-Shore	FALSE	TRUE	FALSE	4.04591	2.97127	0.941254	0.873147
cg00168942	219770	GJD4	chr10	35894430	35894431	CGI-N-Shelf	TRUE	FALSE	FALSE	4.3438	3.47273	0.952672	0.914427
cg00169019	7148	TNXB	chr6	32056438	32056439	CGI-S-Shore	FALSE	TRUE	FALSE	3.80893	2.38278	0.93144	0.818589
cg00169419	NA	NA	chr4	111530900	111530901	CGI-N-Shore	FALSE	FALSE	TRUE	2.71906	-0.528768	0.857629	0.425483
cg00169776	NA	NA	chr1	2948512	2948513	CGI	FALSE	FALSE	TRUE	-1.52174	-2.78448	0.27265	0.135479
cg00171092	3693	ITGB5	chr3	124531371	124531372	Non-CGI	FALSE	TRUE	FALSE	1.09685	-1.0725	0.674855	0.333712
cg00171729	9697	TRAM2	chr6	52416856	52416857	Non-CGI	FALSE	TRUE	FALSE	-1.15861	-2.63767	0.313585	0.141123
cg00172803	146167	SLC38A8	chr16	84076941	84076942	CGI	TRUE	FALSE	FALSE	1.97984	1.36456	0.794541	0.711093
cg00172812	NA	NA	chr1	23279685	23279686	CGI	FALSE	FALSE	TRUE	-0.949113	-1.88351	0.354984	0.228353
cg00173098	55968	NSFL1C	chr20	1445335	1445336	CGI-N-Shore	FALSE	TRUE	FALSE	3.12644	2.23975	0.892885	0.799798
cg00174179	6988	TCTA	chr3	49450293	49450294	CGI-S-Shore	TRUE	TRUE	FALSE	-1.09159	-2.13028	0.329353	0.195208
cg00174179	387	RHOA	chr3	49450293	49450294	CGI-S-Shore	TRUE	TRUE	FALSE	-1.09159	-2.13028	0.329353	0.195208
cg00174279	NA	NA	chr17	75525361	75525362	CGI-S-Shore	TRUE	FALSE	FALSE	0.938999	-0.337794	0.649244	0.451818
cg00174743	5116	PCNT	chr21	47812611	47812612	CGI-N-Shore	FALSE	TRUE	FALSE	-0.273242	-1.44701	0.45245	0.275096
cg00175150	100874054	LINC00568	chr1	150486261	150486262	CGI-N-Shore	FALSE	TRUE	FALSE	3.28178	2.42193	0.903506	0.837705
cg00175150	1893	ECM1	chr1	150486261	150486262	CGI-N-Shore	FALSE	TRUE	FALSE	3.28178	2.42193	0.903506	0.837705
cg00175573	57186	RALGAPA2	chr20	20433203	20433204	CGI	FALSE	TRUE	FALSE	2.18405	-0.0831411	0.803238	0.479269
cg00175735	644444	TMEM30C	chr3	99903386	99903387	Non-CGI	TRUE	FALSE	FALSE	3.9411	3.20724	0.937186	0.889645
cg00176309	NA	NA	chr21	46303258	46303259	CGI-N-Shelf	FALSE	FALSE	TRUE	3.42711	2.38841	0.908636	0.827714
cg00176709	NA	NA	chr6	85483334	85483335	CGI	FALSE	FALSE	TRUE	-2.0943	-2.89169	0.193436	0.121074
cg00177142	53917	RAB24	chr5	176729012	176729013	CGI-N-Shore	TRUE	TRUE	FALSE	1.9721	1.05207	0.788762	0.669846
cg00177142	27166	PRELID1	chr5	176729012	176729013	CGI-N-Shore	TRUE	TRUE	FALSE	1.9721	1.05207	0.788762	0.669846
cg00177243	783	CACNB2	chr10	18434068	18434069	CGI-S-Shelf	FALSE	TRUE	FALSE	0.268397	-0.732089	0.544283	0.377863
cg00177388	NA	NA	chr5	72677886	72677887	CGI	FALSE	FALSE	TRUE	1.26269	0.337697	0.702916	0.555677
cg00178427	59269	HIVEP3	chr1	42500551	42500552	CGI-N-Shore	FALSE	TRUE	FALSE	1.34754	0.496851	0.712106	0.581939
cg00178850	128178	EDARADD	chr1	236559675	236559676	CGI	FALSE	TRUE	FALSE	-0.921402	-1.66219	0.350235	0.244979
cg00178928	NA	NA	chr2	233366275	233366276	CGI-N-Shore	FALSE	FALSE	TRUE	1.24225	0.241161	0.699261	0.54086
cg00179196	64285	RHBDF1	chr16	117934	117935	Non-CGI	FALSE	TRUE	FALSE	3.8319	1.59123	0.933664	0.739926
cg00179374	91584	PLXNA4	chr7	132259150	132259151	CGI-N-Shore	FALSE	TRUE	FALSE	3.96882	3.04209	0.934623	0.873276
cg00179576	2734	GLG1	chr16	74483694	74483695	Non-CGI	FALSE	TRUE	FALSE	1.77699	0.520763	0.770317	0.585788
cg00179795	253738	EBF3	chr10	131695114	131695115	CGI-S-Shore	FALSE	TRUE	FALSE	2.38529	1.61803	0.832055	0.74618
cg00179921	91582	RPS19BP1	chr22	39927437	39927438	CGI-S-Shore	FALSE	TRUE	FALSE	1.58211	0.401728	0.74683	0.568087
cg00179940	NA	NA	chr12	126978053	126978054	Non-CGI	FALSE	FALSE	TRUE	1.67446	0.777582	0.752877	0.626051
cg00180097	7916	PRRC2A	chr6	31601157	31601158	CGI-S-Shore	FALSE	TRUE	FALSE	1.54796	0.727927	0.740948	0.618901
cg00181125	10060	ABCC9	chr12	22095182	22095183	CGI	TRUE	FALSE	FALSE	-1.46841	-2.56765	0.271878	0.14593
cg00182273	766	CA7	chr16	66876847	66876848	CGI-N-Shore	TRUE	TRUE	FALSE	-0.0171284	-1.9436	0.499697	0.214576
cg00182639	6910	TBX5	chr12	114841671	114841672	CGI	TRUE	TRUE	FALSE	1.71829	1.01545	0.763279	0.658651
cg00182893	NA	NA	chr6	139861189	139861190	Non-CGI	FALSE	FALSE	TRUE	2.33566	-0.344158	0.807858	0.452875
cg00182994	57524	CASKIN1	chr16	2234571	2234572	CGI	FALSE	TRUE	FALSE	2.10499	1.23709	0.805803	0.69207
cg00183067	57480	PLEKHG1	chr6	151075493	151075494	Non-CGI	FALSE	TRUE	FALSE	1.65557	0.778037	0.753526	0.628906
cg00183415	80201	HKDC1	chr10	71008388	71008389	Non-CGI	FALSE	TRUE	FALSE	3.50937	2.77998	0.916266	0.865267
cg00185066	10253	SPRY2	chr13	80910763	80910764	CGI-N-Shore	FALSE	TRUE	FALSE	3.15331	1.47655	0.895438	0.716423
cg00186207	NA	NA	chr2	134788575	134788576	CGI-S-Shelf	FALSE	FALSE	TRUE	2.78989	2.03944	0.867597	0.796824
cg00186374	NA	NA	chr2	151659068	151659069	Non-CGI	FALSE	FALSE	TRUE	2.90842	1.8086	0.876935	0.767
cg00186954	56672	AKIP1	chr11	8933980	8933981	CGI-S-Shore	TRUE	TRUE	FALSE	2.06067	1.13694	0.796293	0.663848
cg00186954	6764	ST5	chr11	8933980	8933981	CGI-S-Shore	TRUE	TRUE	FALSE	2.06067	1.13694	0.796293	0.663848
cg00187503	4155	MBP	chr18	74729519	74729520	CGI-S-Shore	TRUE	TRUE	FALSE	1.87636	1.11375	0.776951	0.674525
cg00189989	7122	CLDN5	chr22	19513176	19513177	CGI-S-Shore	TRUE	FALSE	FALSE	3.20886	2.32445	0.899658	0.82739
cg00190355	6550	SLC9A3	chr5	497639	497640	CGI-S-Shore	FALSE	TRUE	FALSE	1.27881	0.459801	0.698669	0.57388
cg00192636	NA	NA	chr17	77804193	77804194	CGI-N-Shore	FALSE	FALSE	TRUE	3.76209	2.93589	0.924196	0.874683
cg00192882	4239	MFAP4	chr17	19291120	19291121	Non-CGI	TRUE	FALSE	FALSE	-2.26707	-3.40618	0.180748	0.0875639
cg00192966	57451	TENM2	chr5	167688102	167688103	CGI-N-Shore	FALSE	TRUE	FALSE	0.50218	-0.732563	0.579091	0.385977
cg00193668	84681	HINT2	chr9	35814283	35814284	CGI-S-Shore	FALSE	TRUE	FALSE	-1.36101	-2.09326	0.284497	0.192279
cg00194126	4929	NR4A2	chr2	157186312	157186313	CGI	TRUE	TRUE	FALSE	2.48358	1.34583	0.838618	0.706181
cg00194277	11185	INMT	chr7	30795751	30795752	Non-CGI	FALSE	TRUE	FALSE	1.85224	-0.0119542	0.777158	0.496884
cg00194277	100526825	INMT-FAM188B	chr7	30795751	30795752	Non-CGI	FALSE	TRUE	FALSE	1.85224	-0.0119542	0.777158	0.496884
cg00194771	83445	GSG1	chr12	13256639	13256640	CGI-S-Shelf	TRUE	FALSE	FALSE	3.44199	2.79602	0.914151	0.866084
cg00196474	NA	NA	chr3	71702735	71702736	Non-CGI	FALSE	FALSE	TRUE	2.9129	1.85529	0.878635	0.767873
cg00197058	9496	TBX4	chr17	59554672	59554673	Non-CGI	FALSE	TRUE	FALSE	1.94152	1.11257	0.780526	0.670157
cg00198729	5539	PPY	chr17	42020748	42020749	Non-CGI	TRUE	FALSE	FALSE	3.81503	3.13115	0.931428	0.893208
cg00199059	112858	TP53RK	chr20	45317219	45317220	CGI-N-Shore	FALSE	TRUE	FALSE	-0.139811	-1.01348	0.476399	0.342995
cg00199753	1840	DTX1	chr12	113519288	113519289	CGI-S-Shelf	FALSE	TRUE	FALSE	1.87062	-0.09001	0.780861	0.493513
cg00200653	6095	RORA	chr15	60883225	60883226	CGI-N-Shore	FALSE	TRUE	FALSE	-0.281501	-1.58487	0.452577	0.266776
cg00201025	199221	DZIP1L	chr3	137832372	137832373	CGI-N-Shore	TRUE	TRUE	FALSE	3.0032	1.7167	0.885144	0.752443
cg00201819	84435	GPR123	chr10	134910421	134910422	CGI	FALSE	TRUE	FALSE	0.327308	-0.433215	0.556276	0.428481
cg00202441	2560	GABRB1	chr4	47033126	47033127	CGI-N-Shore	TRUE	FALSE	FALSE	-1.78977	-2.4078	0.23206	0.167857
cg00202829	80125	CCDC33	chr15	74609868	74609869	Non-CGI	TRUE	TRUE	FALSE	0.689378	-0.535759	0.616346	0.411151
cg00203736	NA	NA	chr7	55022567	55022568	Non-CGI	FALSE	FALSE	TRUE	3.48185	2.09736	0.917082	0.792224
cg00204782	6899	TBX1	chr22	19753364	19753365	CGI	FALSE	TRUE	FALSE	-1.43981	-2.17816	0.278728	0.182746
cg00205703	131408	FAM131A	chr3	184054901	184054902	CGI-S-Shore	TRUE	TRUE	FALSE	-1.7058	-2.53336	0.236752	0.147962
cg00207428	124056	NOXO1	chr16	2031785	2031786	CGI-S-Shore	TRUE	TRUE	FALSE	1.42467	0.594556	0.721834	0.596168
cg00207731	5045	FURIN	chr15	91416118	91416119	CGI-S-Shore	FALSE	TRUE	FALSE	-1.32631	-1.98821	0.287218	0.205876
cg00208274	221937	FOXK1	chr7	4779342	4779343	CGI	FALSE	TRUE	FALSE	4.19086	3.09206	0.944482	0.861638
cg00209520	1261	CNGA3	chr2	98962546	98962547	CGI-N-Shore	TRUE	FALSE	FALSE	0.958298	0.194904	0.654444	0.532755
cg00209623	NA	NA	chr3	193851106	193851107	CGI-N-Shore	FALSE	FALSE	TRUE	3.76673	2.97759	0.931201	0.875583
cg00210249	3098	HK1	chr10	71135679	71135680	Non-CGI	FALSE	TRUE	FALSE	0.394956	-0.506595	0.566638	0.418701
cg00210473	NA	NA	chr6	41341942	41341943	CGI	FALSE	FALSE	TRUE	-0.191097	-1.58235	0.47023	0.271822
cg00210768	5606	MAP2K3	chr17	21200454	21200455	Non-CGI	FALSE	TRUE	FALSE	3.14587	2.17415	0.894872	0.805894
cg00210994	100313938	MIR548G	chr3	99594893	99594894	CGI-N-Shore	FALSE	TRUE	FALSE	-1.83243	-3.06409	0.239633	0.112483
cg00210994	11259	FILIP1L	chr3	99594893	99594894	CGI-N-Shore	FALSE	TRUE	FALSE	-1.83243	-3.06409	0.239633	0.112483
cg00210994	84319	CMSS1	chr3	99594893	99594894	CGI-N-Shore	FALSE	TRUE	FALSE	-1.83243	-3.06409	0.239633	0.112483
cg00211086	NA	NA	chr16	86751671	86751672	Non-CGI	FALSE	FALSE	TRUE	4.13321	3.25438	0.945298	0.896851
cg00211174	4171	MCM2	chr3	127332098	127332099	Non-CGI	FALSE	TRUE	FALSE	0.737071	-0.824875	0.622433	0.363523
cg00211403	9671	WSCD2	chr12	108525241	108525242	CGI-S-Shore	TRUE	TRUE	FALSE	1.034	0.00622729	0.669172	0.497849
cg00211489	90416	C15orf57	chr15	40826026	40826027	Non-CGI	TRUE	TRUE	FALSE	2.55365	1.52673	0.846957	0.727825
cg00211489	359821	MRPL42P5	chr15	40826026	40826027	Non-CGI	TRUE	TRUE	FALSE	2.55365	1.52673	0.846957	0.727825
cg00211821	23164	MPRIP	chr17	16978673	16978674	Non-CGI	FALSE	TRUE	FALSE	3.33463	1.12649	0.907938	0.681161
cg00213052	NA	NA	chr18	77397557	77397558	CGI-S-Shore	FALSE	FALSE	TRUE	1.69935	-0.168515	0.758658	0.479374
cg00213745	57493	HEG1	chr3	124730836	124730837	Non-CGI	FALSE	TRUE	FALSE	3.71628	0.781433	0.926116	0.621284
cg00214012	321	APBA2	chr15	29326467	29326468	Non-CGI	FALSE	TRUE	FALSE	1.83268	0.279008	0.763293	0.547132
cg00215521	NA	NA	chr22	17650811	17650812	CGI-N-Shore	FALSE	FALSE	TRUE	3.795	3.13684	0.931155	0.891365
cg00215611	NA	NA	chr2	219860717	219860718	CGI-S-Shore	FALSE	FALSE	TRUE	-0.804501	-1.42288	0.369175	0.276291
cg00215896	NA	NA	chr17	12291754	12291755	Non-CGI	FALSE	FALSE	TRUE	1.42366	-0.0400132	0.721903	0.495033
cg00216655	23024	PDZRN3	chr3	73606529	73606530	Non-CGI	FALSE	TRUE	FALSE	3.74007	1.87525	0.929329	0.740782
cg00216693	55041	PLEKHB2	chr2	131913247	131913248	CGI	FALSE	TRUE	FALSE	3.24765	2.62108	0.901862	0.850424
cg00218409	NA	NA	chr2	74963008	74963009	Non-CGI	FALSE	FALSE	TRUE	1.99889	0.351321	0.78448	0.556856
cg00218415	6874	TAF4	chr20	60586720	60586721	CGI-S-Shore	FALSE	TRUE	FALSE	3.06038	2.00391	0.89236	0.793763
cg00218447	3222	HOXC5	chr12	54428171	54428172	CGI	FALSE	TRUE	FALSE	-1.51614	-2.41458	0.264938	0.177545
cg00218447	3221	HOXC4	chr12	54428171	54428172	CGI	FALSE	TRUE	FALSE	-1.51614	-2.41458	0.264938	0.177545
cg00218792	NA	NA	chr15	81468599	81468600	Non-CGI	FALSE	FALSE	TRUE	-0.249423	-1.30361	0.457507	0.292093
cg00218893	NA	NA	chr17	73073239	73073240	CGI-N-Shore	FALSE	FALSE	TRUE	3.81306	3.08881	0.930231	0.888889
cg00218914	90288	EFCAB12	chr3	129146731	129146732	CGI-N-Shore	FALSE	TRUE	FALSE	1.57391	0.303554	0.740675	0.550328
cg00219210	9912	ARHGAP44	chr17	12893648	12893649	CGI-S-Shore	FALSE	TRUE	FALSE	4.33021	2.80825	0.951265	0.861389
cg00219626	NA	NA	chr6	28983835	28983836	CGI-S-Shore	FALSE	FALSE	TRUE	3.14582	2.49049	0.893185	0.84097
cg00219653	79874	RABEP2	chr16	28937476	28937477	CGI-S-Shore	TRUE	TRUE	FALSE	-0.678372	-1.50878	0.388223	0.262384
cg00219816	100616530	LOC100616530	chr8	96280555	96280556	CGI-N-Shore	TRUE	TRUE	FALSE	1.91406	0.492724	0.788224	0.57364
cg00219816	157657	C8orf37	chr8	96280555	96280556	CGI-N-Shore	TRUE	TRUE	FALSE	1.91406	0.492724	0.788224	0.57364
cg00220225	6405	SEMA3F	chr3	50194470	50194471	CGI-S-Shore	TRUE	TRUE	FALSE	1.12475	-0.0117644	0.662396	0.500176
cg00220243	NA	NA	chr9	132330135	132330136	CGI-N-Shore	FALSE	FALSE	TRUE	0.229089	-0.548178	0.538312	0.409686
cg00220294	NA	NA	chr16	54322494	54322495	CGI	FALSE	FALSE	TRUE	3.90325	2.66233	0.933455	0.84445
cg00220335	81037	CLPTM1L	chr5	1343783	1343784	CGI-N-Shore	TRUE	TRUE	FALSE	0.753223	-0.642291	0.620367	0.394706
cg00220677	5618	PRLR	chr5	35230935	35230936	CGI-S-Shore	TRUE	FALSE	FALSE	0.0523729	-0.983317	0.508212	0.339796
cg00221382	79191	IRX3	chr16	54322308	54322309	CGI	TRUE	FALSE	FALSE	4.27063	3.04465	0.949817	0.871863
cg00221654	60529	ALX4	chr11	44333030	44333031	CGI	TRUE	FALSE	FALSE	0.927835	-0.254552	0.641467	0.472167
cg00221747	3481	IGF2	chr11	2152428	2152429	CGI-S-Shore	FALSE	TRUE	FALSE	4.56341	3.93519	0.957615	0.93123
cg00221747	723961	INS-IGF2	chr11	2152428	2152429	CGI-S-Shore	FALSE	TRUE	FALSE	4.56341	3.93519	0.957615	0.93123
cg00222656	80313	LRRC27	chr10	134183785	134183786	CGI-N-Shore	FALSE	TRUE	FALSE	2.82003	1.97648	0.870916	0.788792
cg00224083	NA	NA	chr4	139773135	139773136	CGI-N-Shore	FALSE	FALSE	TRUE	-0.997754	-2.01166	0.338021	0.201283
cg00224471	30820	KCNIP1	chr5	169918864	169918865	Non-CGI	FALSE	TRUE	FALSE	0.0746687	-0.86432	0.512851	0.361943
cg00224807	NA	NA	chr2	238065650	238065651	CGI	FALSE	FALSE	TRUE	3.66603	2.31961	0.920604	0.794239
cg00225067	8994	LIMD1	chr3	45647141	45647142	Non-CGI	FALSE	TRUE	FALSE	3.99044	2.84622	0.939184	0.870001
cg00225196	NA	NA	chr8	37556863	37556864	CGI-S-Shore	FALSE	FALSE	TRUE	3.66151	2.42711	0.922267	0.820438
cg00225697	NA	NA	chr6	112684258	112684259	CGI-N-Shelf	FALSE	FALSE	TRUE	2.05396	1.21207	0.802045	0.691827
cg00226580	NA	NA	chr5	89000691	89000692	Non-CGI	FALSE	FALSE	TRUE	2.55213	1.60517	0.847529	0.743646
cg00226923	221472	FGD2	chr6	36972027	36972028	Non-CGI	TRUE	FALSE	FALSE	3.03762	2.21577	0.889747	0.803244
cg00227156	57553	MICAL3	chr22	18463646	18463647	Non-CGI	TRUE	TRUE	FALSE	2.43463	0.975576	0.839572	0.647418
cg00227156	693233	MIR648	chr22	18463646	18463647	Non-CGI	TRUE	TRUE	FALSE	2.43463	0.975576	0.839572	0.647418
cg00227665	NA	NA	chr16	87735443	87735444	CGI	TRUE	FALSE	FALSE	3.84956	2.85772	0.929861	0.869257
cg00228017	NA	NA	chr18	53447841	53447842	CGI-S-Shore	FALSE	TRUE	FALSE	-0.525619	-2.2316	0.417266	0.187124
cg00228390	26238	C6orf123	chr6	168197667	168197668	CGI-S-Shore	TRUE	FALSE	FALSE	-1.47778	-2.36372	0.273895	0.171359
cg00228735	NA	NA	chr7	131304505	131304506	Non-CGI	FALSE	FALSE	TRUE	3.35987	2.73887	0.908222	0.866615
cg00228796	1889	ECE1	chr1	21670736	21670737	CGI-N-Shore	FALSE	TRUE	FALSE	3.71707	0.25606	0.920877	0.539213
cg00229387	93643	TJAP1	chr6	43445942	43445943	CGI-S-Shore	TRUE	TRUE	FALSE	-1.46649	-2.20995	0.276333	0.187936
cg00230074	388419	BTBD17	chr17	72358042	72358043	CGI-S-Shore	TRUE	FALSE	FALSE	-1.12486	-1.85113	0.320892	0.230226
cg00230120	100292680	LINC00942	chr12	1609346	1609347	CGI	TRUE	FALSE	FALSE	4.58404	1.61401	0.95902	0.723914
cg00230766	8853	ASAP2	chr2	9388337	9388338	Non-CGI	FALSE	TRUE	FALSE	3.74542	1.7362	0.92953	0.760995
cg00231049	1870	E2F2	chr1	23855119	23855120	CGI-N-Shore	TRUE	TRUE	FALSE	-0.80315	-1.57611	0.366695	0.253846
cg00231207	100507266	STX18-AS1	chr4	4616630	4616631	Non-CGI	FALSE	TRUE	FALSE	2.28904	0.504317	0.822132	0.579236
cg00231771	340204	CLPSL1	chr6	35748776	35748777	Non-CGI	TRUE	FALSE	FALSE	0.98078	0.335451	0.661508	0.555319
cg00232059	553158	PRR5-ARHGAP8	chr22	45131501	45131502	CGI-N-Shore	FALSE	TRUE	FALSE	3.19773	2.10196	0.892784	0.797924
cg00232059	55615	PRR5	chr22	45131501	45131502	CGI-N-Shore	FALSE	TRUE	FALSE	3.19773	2.10196	0.892784	0.797924
cg00232402	NA	NA	chr18	77385290	77385291	CGI-N-Shore	FALSE	FALSE	TRUE	2.51714	1.39751	0.840875	0.720852
cg00232500	158326	FREM1	chr9	14910689	14910690	Non-CGI	FALSE	TRUE	FALSE	2.33229	0.147853	0.82759	0.524463
cg00232535	NA	NA	chr7	5593287	5593288	CGI-N-Shore	FALSE	FALSE	TRUE	3.11243	1.97052	0.894264	0.789803
cg00232832	NA	NA	chr15	30163660	30163661	CGI	FALSE	FALSE	TRUE	4.50936	3.18613	0.957037	0.891458
cg00234384	NA	NA	chr5	54179570	54179571	CGI	FALSE	FALSE	TRUE	-1.34079	-2.18385	0.290982	0.182171
cg00234616	3196	TLX2	chr2	74740572	74740573	CGI	TRUE	FALSE	FALSE	-1.53199	-2.16734	0.261878	0.187545
cg00234961	9889	ZBED4	chr22	50246573	50246574	CGI-N-Shore	TRUE	FALSE	FALSE	-1.79165	-2.44631	0.225437	0.156902
cg00235661	151648	SGOL1	chr3	20228976	20228977	CGI-S-Shore	TRUE	FALSE	FALSE	2.83418	1.90349	0.866385	0.774955
cg00235754	23191	CYFIP1	chr15	22904606	22904607	Non-CGI	FALSE	TRUE	FALSE	-0.100321	-1.17703	0.484156	0.313022
cg00236576	284207	METRNL	chr17	81039406	81039407	CGI	FALSE	TRUE	FALSE	0.673995	-1.18055	0.610446	0.323996
cg00236729	288	ANK3	chr10	62409865	62409866	Non-CGI	FALSE	TRUE	FALSE	3.27354	2.63476	0.903214	0.853748
cg00236766	58190	CTDSP1	chr2	219268000	219268001	CGI-S-Shelf	FALSE	TRUE	FALSE	3.14552	2.27632	0.896443	0.821468
cg00236832	5914	RARA	chr17	38465489	38465490	Non-CGI	TRUE	FALSE	FALSE	-1.9227	-2.55275	0.210911	0.146399
cg00237010	4815	NINJ2	chr12	772861	772862	Non-CGI	TRUE	FALSE	FALSE	2.5426	1.49588	0.84523	0.718394
cg00237391	50619	DEF6	chr6	35265643	35265644	CGI	TRUE	FALSE	FALSE	2.23705	0.68929	0.815975	0.609698
cg00237512	6919	TCEA2	chr20	62688874	62688875	CGI	TRUE	TRUE	FALSE	0.905225	0.220114	0.647352	0.535831
cg00237520	91522	COL23A1	chr5	177764237	177764238	CGI	FALSE	TRUE	FALSE	1.44784	0.436434	0.728838	0.573724
cg00237876	146894	CD300LG	chr17	41924043	41924044	CGI-N-Shore	TRUE	FALSE	FALSE	1.62173	0.899791	0.75244	0.644192
cg00237904	283120	H19	chr11	2020314	2020315	CGI	TRUE	FALSE	FALSE	2.13172	1.30659	0.805737	0.710268
cg00238510	130589	GALM	chr2	38961590	38961591	Non-CGI	FALSE	TRUE	FALSE	2.01199	0.113212	0.796521	0.518073
cg00238662	84630	TTBK1	chr6	43235803	43235804	CGI-N-Shore	FALSE	TRUE	FALSE	3.24834	2.60022	0.903809	0.848278
cg00238848	116985	ARAP1	chr11	72408252	72408253	CGI	FALSE	TRUE	FALSE	0.681847	-1.05222	0.614186	0.343791
cg00239353	9235	IL32	chr16	3115133	3115134	Non-CGI	TRUE	FALSE	FALSE	2.79756	-0.398285	0.870023	0.44397
cg00239563	NA	NA	chr4	81128029	81128030	CGI-N-Shore	FALSE	FALSE	TRUE	1.7345	-0.444547	0.763062	0.426785
cg00239657	NA	NA	chr5	2703942	2703943	CGI	FALSE	FALSE	TRUE	0.324407	-0.321067	0.553223	0.445643
cg00239660	93663	ARHGAP18	chr6	130182620	130182621	Non-CGI	TRUE	FALSE	FALSE	-0.683085	-2.21242	0.396651	0.182897
cg00239660	253582	TMEM244	chr6	130182620	130182621	Non-CGI	TRUE	FALSE	FALSE	-0.683085	-2.21242	0.396651	0.182897
cg00239988	100996485	LOC100996485	chr5	134606261	134606262	Non-CGI	FALSE	TRUE	FALSE	2.5654	1.55965	0.845771	0.726623
cg00240007	22818	COPZ1	chr12	54730529	54730530	Non-CGI	TRUE	TRUE	FALSE	3.23569	2.49564	0.895656	0.837617
cg00240007	442892	MIR148B	chr12	54730529	54730530	Non-CGI	TRUE	TRUE	FALSE	3.23569	2.49564	0.895656	0.837617
cg00240178	1915	EEF1A1	chr6	74232108	74232109	CGI-S-Shore	TRUE	FALSE	FALSE	2.08577	-0.624376	0.787574	0.403302
cg00240767	112869	CCDC101	chr16	28564522	28564523	CGI-N-Shore	TRUE	TRUE	FALSE	3.12016	2.32694	0.893286	0.823834
cg00240880	8839	WISP2	chr20	43343233	43343234	Non-CGI	TRUE	TRUE	FALSE	3.40619	1.50906	0.911157	0.731546
cg00240880	79015	LOC79015	chr20	43343233	43343234	Non-CGI	TRUE	TRUE	FALSE	3.40619	1.50906	0.911157	0.731546
cg00241273	1948	EFNB2	chr13	107172856	107172857	Non-CGI	FALSE	TRUE	FALSE	3.24602	1.76138	0.90066	0.76142
cg00241432	10257	ABCC4	chr13	95846842	95846843	Non-CGI	FALSE	TRUE	FALSE	3.67427	2.98057	0.925809	0.882573
cg00241638	100133669	LOC100133669	chr8	144097644	144097645	CGI-N-Shore	FALSE	TRUE	FALSE	-0.333967	-1.40062	0.444712	0.282497
cg00242031	1812	DRD1	chr5	174869880	174869881	CGI-N-Shore	TRUE	TRUE	FALSE	2.03817	1.18389	0.79818	0.691867
cg00242341	116985	ARAP1	chr11	72447419	72447420	Non-CGI	FALSE	TRUE	FALSE	3.31023	2.45434	0.906202	0.826197
cg00244517	132946	ARL9	chr4	57371467	57371468	CGI-N-Shore	TRUE	FALSE	FALSE	0.322163	-0.970661	0.554137	0.341734
cg00245454	57600	FNIP2	chr4	159746160	159746161	Non-CGI	FALSE	TRUE	FALSE	-0.589724	-1.40189	0.410311	0.279553
cg00245854	51164	DCTN4	chr5	150138895	150138896	CGI-S-Shore	TRUE	FALSE	FALSE	1.05144	0.319792	0.669197	0.55709
cg00246451	9181	ARHGEF2	chr1	155949012	155949013	CGI-S-Shore	TRUE	TRUE	FALSE	-0.781399	-2.28261	0.370461	0.173831
cg00246969	8428	STK24	chr13	99159656	99159657	CGI-S-Shore	FALSE	TRUE	FALSE	-0.867801	-2.05624	0.358054	0.195603
cg00247631	7287	TULP1	chr6	35479350	35479351	CGI-N-Shore	FALSE	TRUE	FALSE	0.377466	-0.527016	0.555572	0.415781
cg00249032	6385	SDC4	chr20	43975752	43975753	CGI-N-Shore	FALSE	TRUE	FALSE	1.1918	-0.903049	0.688514	0.358363
cg00249264	54947	LPCAT2	chr16	55542747	55542748	CGI-N-Shore	TRUE	FALSE	FALSE	2.72089	1.58461	0.863176	0.746069
cg00249974	23381	SMG5	chr1	156254149	156254150	CGI-S-Shore	TRUE	TRUE	FALSE	3.85636	3.23662	0.932736	0.891536
cg00249974	84283	TMEM79	chr1	156254149	156254150	CGI-S-Shore	TRUE	TRUE	FALSE	3.85636	3.23662	0.932736	0.891536
cg00250430	10655	DMRT2	chr9	1051579	1051580	CGI	TRUE	TRUE	FALSE	0.37119	-0.525548	0.562108	0.418245
cg00251678	63976	PRDM16	chr1	3305629	3305630	CGI-S-Shore	FALSE	TRUE	FALSE	1.94111	0.93002	0.788067	0.642937
cg00251716	10806	SDCCAG8	chr1	243479948	243479949	Non-CGI	FALSE	TRUE	FALSE	2.9172	1.7512	0.870395	0.746839
cg00251767	9760	TOX	chr8	60010714	60010715	Non-CGI	FALSE	TRUE	FALSE	4.47875	3.76813	0.956769	0.928695
cg00252442	NA	NA	chr1	201451260	201451261	CGI-S-Shore	FALSE	FALSE	TRUE	-2.13081	-2.78517	0.187846	0.128871
cg00253379	NA	NA	chr16	54404709	54404710	CGI	FALSE	FALSE	TRUE	4.35379	3.49239	0.952789	0.910778
cg00253658	NA	NA	chr16	54210496	54210497	CGI-N-Shore	FALSE	FALSE	TRUE	3.04871	1.5906	0.886414	0.727613
cg00253971	NA	NA	chr19	4038851	4038852	CGI	FALSE	FALSE	TRUE	2.11448	1.35103	0.809931	0.706147
cg00254258	63976	PRDM16	chr1	3105189	3105190	CGI	FALSE	TRUE	FALSE	4.34656	3.2806	0.951669	0.901494
cg00254556	1135	CHRNA2	chr8	27318934	27318935	CGI-N-Shelf	FALSE	TRUE	FALSE	1.73861	0.48196	0.761283	0.578473
cg00256074	29895	MYLPF	chr16	30386150	30386151	CGI-S-Shelf	TRUE	FALSE	FALSE	2.47298	1.7977	0.839618	0.765085
cg00256155	NA	NA	chr1	47915647	47915648	CGI	FALSE	FALSE	TRUE	0.162368	-0.861795	0.52446	0.369546
cg00256928	NA	NA	chr12	115175155	115175156	CGI-S-Shore	FALSE	FALSE	TRUE	3.76543	3.00484	0.930643	0.876316
cg00257271	389289	ANXA2R	chr5	43040885	43040886	CGI	TRUE	FALSE	FALSE	-1.36787	-2.19004	0.285526	0.18171
cg00257271	153684	LOC153684	chr5	43040885	43040886	CGI	TRUE	FALSE	FALSE	-1.36787	-2.19004	0.285526	0.18171
cg00257455	NA	NA	chr1	65530538	65530539	CGI-N-Shore	FALSE	FALSE	TRUE	-0.524283	-1.94619	0.412972	0.213849
cg00257893	57224	NHSL1	chr6	138820840	138820841	Non-CGI	TRUE	TRUE	FALSE	3.10928	0.966201	0.888486	0.654048
cg00258633	83478	ARHGAP24	chr4	86745824	86745825	Non-CGI	FALSE	TRUE	FALSE	3.93249	3.30747	0.937299	0.903468
cg00259019	116987	AGAP1	chr2	236611999	236612000	Non-CGI	FALSE	TRUE	FALSE	1.09123	-0.893575	0.677168	0.366658
cg00259097	55697	VAC14	chr16	70770604	70770605	Non-CGI	FALSE	TRUE	FALSE	3.90387	3.20485	0.936993	0.896422
cg00259234	NA	NA	chr17	79844397	79844398	CGI-N-Shore	FALSE	FALSE	TRUE	2.4176	1.20659	0.836346	0.677139
cg00259367	400745	SH2D5	chr1	21057579	21057580	CGI-N-Shore	FALSE	TRUE	FALSE	2.46065	1.36521	0.83631	0.714727
cg00259755	170394	PWWP2B	chr10	134209763	134209764	CGI	TRUE	FALSE	FALSE	-2.21821	-3.35622	0.184261	0.0910039
cg00260387	5545	PRB4	chr12	11151478	11151479	Non-CGI	TRUE	TRUE	FALSE	3.948	2.68091	0.931081	0.831937
cg00260387	100533464	PRH1-PRR4	chr12	11151478	11151479	Non-CGI	TRUE	TRUE	FALSE	3.948	2.68091	0.931081	0.831937
cg00260387	259295	TAS2R20	chr12	11151478	11151479	Non-CGI	TRUE	TRUE	FALSE	3.948	2.68091	0.931081	0.831937
cg00261912	9605	VPS9D1	chr16	89777763	89777764	CGI	TRUE	TRUE	FALSE	3.31606	2.21855	0.897496	0.809177
cg00261912	100128881	VPS9D1-AS1	chr16	89777763	89777764	CGI	TRUE	TRUE	FALSE	3.31606	2.21855	0.897496	0.809177
cg00262621	8510	MMP23B	chr1	1566374	1566375	CGI	TRUE	FALSE	FALSE	-0.724514	-2.02872	0.381834	0.203047
cg00263368	NA	NA	chr7	150999591	150999592	CGI-N-Shore	FALSE	FALSE	TRUE	0.258497	-0.789224	0.543638	0.373217
cg00264133	NA	NA	chr17	73154796	73154797	CGI-S-Shelf	FALSE	FALSE	TRUE	1.82659	1.14136	0.777668	0.681738
cg00264419	8795	TNFRSF10B	chr8	22922124	22922125	CGI-N-Shelf	FALSE	TRUE	FALSE	2.28697	0.107527	0.817448	0.515683
cg00264799	3479	IGF1	chr12	102848839	102848840	Non-CGI	FALSE	TRUE	FALSE	1.57147	0.0852669	0.74294	0.51696
cg00266286	4883	NPR3	chr5	32713723	32713724	CGI	FALSE	TRUE	FALSE	-1.82594	-2.58683	0.232199	0.146204
cg00267713	1944	EFNA3	chr1	155053851	155053852	CGI	FALSE	TRUE	FALSE	-1.34418	-1.95779	0.28986	0.208472
cg00268086	22861	NLRP1	chr17	5487376	5487377	Non-CGI	TRUE	TRUE	FALSE	-0.707813	-2.27637	0.394562	0.184062
cg00268330	169200	TMEM64	chr8	91801473	91801474	CGI-N-Shelf	FALSE	TRUE	FALSE	3.37293	2.25779	0.906498	0.810908
cg00268840	60529	ALX4	chr11	44332653	44332654	CGI	TRUE	FALSE	FALSE	0.27752	-2.1378	0.542551	0.197712
cg00271204	NA	NA	chr5	139142898	139142899	CGI-N-Shore	FALSE	FALSE	TRUE	3.79212	2.73198	0.931773	0.859537
cg00271522	NA	NA	chr7	1264195	1264196	CGI	FALSE	FALSE	TRUE	-1.74688	-2.52623	0.235216	0.149013
cg00274203	93058	COQ10A	chr12	56661537	56661538	CGI-S-Shore	TRUE	TRUE	FALSE	1.49048	0.504139	0.730955	0.584026
cg00275126	NA	NA	chr5	35902250	35902251	Non-CGI	FALSE	FALSE	TRUE	2.36124	1.16815	0.833351	0.688341
cg00275828	85294	KRTAP2-4	chr17	39222690	39222691	Non-CGI	TRUE	FALSE	FALSE	-2.06085	-2.75584	0.20442	0.129638
cg00277165	9319	TRIP13	chr5	912383	912384	CGI-N-Shore	FALSE	TRUE	FALSE	3.90317	3.19458	0.934838	0.891544
cg00277246	4627	MYH9	chr22	36682870	36682871	CGI-S-Shelf	FALSE	TRUE	FALSE	2.55183	1.21799	0.851311	0.696671
cg00277384	9644	SH3PXD2A	chr10	105454768	105454769	CGI-S-Shore	TRUE	TRUE	FALSE	3.70756	2.62225	0.927441	0.849524
cg00278359	170954	PPP1R18	chr6	30652829	30652830	CGI-N-Shore	TRUE	TRUE	FALSE	-0.747926	-2.1192	0.37979	0.20443
cg00278392	NA	NA	chr6	16802505	16802506	Non-CGI	FALSE	FALSE	TRUE	-1.70005	-2.68522	0.242306	0.135862
cg00278517	6196	RPS6KA2	chr6	167070616	167070617	CGI	FALSE	TRUE	FALSE	1.75797	0.61738	0.755188	0.5998
cg00279406	3707	ITPKB	chr1	226924739	226924740	CGI	FALSE	TRUE	FALSE	1.06584	0.117711	0.666814	0.515952
cg00279790	NA	NA	chr1	46914033	46914034	CGI-S-Shore	FALSE	FALSE	TRUE	-2.25001	-2.87284	0.176179	0.120715
cg00280235	4897	NRCAM	chr7	107797076	107797077	Non-CGI	TRUE	TRUE	FALSE	0.34264	-0.505722	0.556177	0.41791
cg00280812	144501	KRT80	chr12	52585844	52585845	Non-CGI	TRUE	FALSE	FALSE	2.69349	2.08249	0.863216	0.797071
cg00281273	79888	LPCAT1	chr5	1514511	1514512	CGI	FALSE	TRUE	FALSE	2.54749	1.90103	0.841431	0.785184
cg00281467	613	BCR	chr22	23522460	23522461	CGI	TRUE	FALSE	FALSE	-2.09969	-3.08503	0.192388	0.106385
cg00281551	NA	NA	chr4	41884566	41884567	CGI-S-Shore	TRUE	FALSE	FALSE	0.732115	-0.397524	0.620486	0.43648
cg00283535	312	ANXA13	chr8	124749564	124749565	Non-CGI	TRUE	FALSE	FALSE	1.20463	-0.381888	0.690934	0.435431
cg00283986	NA	NA	chr2	20875062	20875063	CGI-S-Shelf	FALSE	FALSE	TRUE	1.07674	-0.289803	0.668959	0.455999
cg00284179	100144595	LOC100144595	chr2	155314028	155314029	Non-CGI	TRUE	FALSE	FALSE	0.869776	-0.127121	0.641396	0.478346
cg00284386	9639	ARHGEF10	chr8	1786207	1786208	CGI-S-Shore	FALSE	TRUE	FALSE	3.48072	1.9794	0.912443	0.782571
cg00285902	79442	LRRC2	chr3	46605616	46605617	CGI-N-Shore	FALSE	TRUE	FALSE	3.98748	3.1934	0.939542	0.897023
cg00286125	126393	HSPB6	chr19	36246906	36246907	CGI	TRUE	TRUE	FALSE	-1.44674	-2.44972	0.272734	0.156034
cg00286188	4052	LTBP1	chr2	33493596	33493597	Non-CGI	FALSE	TRUE	FALSE	2.35931	1.29413	0.830073	0.695072
cg00286512	5575	PRKAR1B	chr7	754102	754103	CGI-S-Shore	TRUE	TRUE	FALSE	3.06167	2.40405	0.887177	0.829888
cg00287012	125488	TTC39C	chr18	21593174	21593175	CGI-N-Shore	TRUE	TRUE	FALSE	2.14945	0.809737	0.811771	0.626395
cg00287413	1591	CYP24A1	chr20	52788779	52788780	CGI-N-Shore	TRUE	TRUE	FALSE	2.47153	1.73112	0.83736	0.756615
cg00287974	10793	ZNF273	chr7	64348873	64348874	CGI-N-Shore	FALSE	TRUE	FALSE	0.826379	-0.893809	0.633973	0.359938
cg00288376	NA	NA	chr15	82313720	82313721	Non-CGI	FALSE	FALSE	TRUE	1.61115	0.993461	0.748801	0.661586
cg00288598	27161	2002-08-01	chr8	141555295	141555296	CGI-N-Shore	FALSE	TRUE	FALSE	0.350491	-1.31684	0.555955	0.296896
cg00288957	348094	ANKDD1A	chr15	65203541	65203542	CGI-N-Shore	TRUE	FALSE	FALSE	1.2538	0.296957	0.695164	0.550148
cg00290086	10655	DMRT2	chr9	1050903	1050904	CGI-S-Shore	TRUE	TRUE	FALSE	3.25919	2.62144	0.897576	0.85251
cg00290340	9543	IGDCC3	chr15	65625267	65625268	CGI	FALSE	TRUE	FALSE	2.15632	1.28147	0.810652	0.698821
cg00291478	6001	RGS10	chr10	121301041	121301042	CGI-N-Shore	FALSE	TRUE	FALSE	4.33817	1.77487	0.951939	0.759262
cg00292513	574538	LOC574538	chr12	248296	248297	CGI	FALSE	TRUE	FALSE	-1.64944	-2.4194	0.24673	0.164235
cg00292513	440073	IQSEC3	chr12	248296	248297	CGI	FALSE	TRUE	FALSE	-1.64944	-2.4194	0.24673	0.164235
cg00293303	23085	ERC1	chr12	1553525	1553526	Non-CGI	FALSE	TRUE	FALSE	1.69727	-0.451063	0.751814	0.440288
cg00293996	23562	CLDN14	chr21	37915391	37915392	CGI-S-Shore	TRUE	TRUE	FALSE	3.0817	2.29367	0.891299	0.826112
cg00294267	23090	ZNF423	chr16	49572227	49572228	Non-CGI	FALSE	TRUE	FALSE	1.85664	0.729352	0.781628	0.621598
cg00294534	84262	PSMG3	chr7	1607247	1607248	CGI	FALSE	TRUE	FALSE	-0.754242	-1.95111	0.380773	0.233824
cg00294538	NA	NA	chr13	114062109	114062110	CGI	FALSE	FALSE	TRUE	3.6652	2.86972	0.924606	0.873565
cg00295182	55229	PANK4	chr1	2456436	2456437	CGI-S-Shore	FALSE	TRUE	FALSE	1.10491	0.355682	0.678557	0.560048
cg00295382	4610	MYCL	chr1	40364870	40364871	CGI-N-Shore	FALSE	TRUE	FALSE	3.44706	1.48048	0.908254	0.722364
cg00295604	NA	NA	chr11	102139524	102139525	CGI	FALSE	FALSE	TRUE	-2.39221	-3.2139	0.165256	0.10068
cg00295780	10806	SDCCAG8	chr1	243635800	243635801	CGI-N-Shore	FALSE	TRUE	FALSE	2.77195	1.53044	0.868609	0.740158
cg00296038	9686	VGLL4	chr3	11624533	11624534	Non-CGI	TRUE	TRUE	FALSE	1.98597	0.226351	0.783845	0.537453
cg00296121	55691	FRMD4A	chr10	13933247	13933248	CGI	FALSE	TRUE	FALSE	-1.67138	-3.04218	0.254581	0.109149
cg00297584	100287569	LINC00173	chr12	116971031	116971032	CGI-N-Shore	TRUE	FALSE	FALSE	-0.979733	-2.0712	0.344464	0.206877
cg00297832	142678	MIB2	chr1	1565541	1565542	CGI	FALSE	TRUE	FALSE	4.01048	2.52983	0.937655	0.840048
cg00297912	51106	TFB1M	chr6	155636825	155636826	CGI-S-Shore	TRUE	FALSE	FALSE	0.0925507	-0.791813	0.513418	0.372469
cg00298324	83541	FAM110A	chr20	822788	822789	CGI	FALSE	TRUE	FALSE	2.95523	0.643042	0.874949	0.601229
cg00298532	22883	CLSTN1	chr1	9790325	9790326	CGI	FALSE	TRUE	FALSE	4.4193	3.73516	0.954438	0.922071
cg00299070	6262	RYR2	chr1	237946534	237946535	CGI-N-Shore	FALSE	TRUE	FALSE	-0.152713	-0.841285	0.473959	0.362401
cg00300637	57491	AHRR	chr5	319433	319434	CGI-N-Shore	FALSE	TRUE	FALSE	1.15389	0.252411	0.687961	0.54217
cg00300794	8912	CACNA1H	chr16	1231723	1231724	CGI	FALSE	TRUE	FALSE	2.19879	0.479277	0.814047	0.578328
cg00300969	1789	DNMT3B	chr20	31366486	31366487	Non-CGI	TRUE	TRUE	FALSE	2.69237	1.91407	0.858082	0.785101
cg00301555	118788	PIK3AP1	chr10	98366681	98366682	Non-CGI	FALSE	TRUE	FALSE	2.56201	1.44263	0.847818	0.718717
cg00301762	NA	NA	chr7	1714056	1714057	CGI-N-Shore	FALSE	FALSE	TRUE	2.65616	1.17339	0.856712	0.679795
cg00302160	4482	MSRA	chr8	10030945	10030946	Non-CGI	FALSE	TRUE	FALSE	2.22327	0.722988	0.812452	0.60434
cg00303111	414236	C10orf55	chr10	75672723	75672724	CGI-S-Shore	TRUE	TRUE	FALSE	4.01948	1.65611	0.940679	0.732444
cg00303111	5328	PLAU	chr10	75672723	75672724	CGI-S-Shore	TRUE	TRUE	FALSE	4.01948	1.65611	0.940679	0.732444
cg00303210	56829	ZC3HAV1	chr7	138745709	138745710	Non-CGI	FALSE	TRUE	FALSE	2.65806	1.43434	0.857623	0.708729
cg00303429	NA	NA	chr7	13782482	13782483	Non-CGI	FALSE	FALSE	TRUE	1.82043	1.05861	0.776543	0.672932
cg00303811	7781	SLC30A3	chr2	27483693	27483694	CGI-N-Shore	FALSE	TRUE	FALSE	2.3665	1.43715	0.832084	0.726529
cg00305629	25861	DFNB31	chr9	117265998	117265999	CGI-N-Shore	TRUE	TRUE	FALSE	2.5717	1.25469	0.845402	0.694121
cg00305740	NA	NA	chr7	73392697	73392698	CGI-N-Shore	FALSE	FALSE	TRUE	2.35336	0.0197442	0.818028	0.507961
cg00306112	NA	NA	chr2	219773416	219773417	CGI	FALSE	TRUE	FALSE	0.359954	-0.518391	0.559401	0.423975
cg00307066	NA	NA	chr4	41880465	41880466	CGI	FALSE	FALSE	TRUE	1.97131	0.71055	0.785771	0.611668
cg00307383	55243	KIRREL	chr1	157962460	157962461	CGI-N-Shore	TRUE	FALSE	FALSE	3.74929	3.04689	0.929528	0.887179
cg00308159	4330	MN1	chr22	28198591	28198592	CGI	TRUE	FALSE	FALSE	0.031302	-1.12395	0.505328	0.322566
cg00308841	NA	NA	chr5	90790737	90790738	Non-CGI	FALSE	FALSE	TRUE	3.26715	2.41878	0.9024	0.833555
cg00309945	401944	LDLRAD2	chr1	22148926	22148927	CGI-N-Shore	FALSE	TRUE	FALSE	2.30326	1.54553	0.826597	0.73733
cg00309945	3339	HSPG2	chr1	22148926	22148927	CGI-N-Shore	FALSE	TRUE	FALSE	2.30326	1.54553	0.826597	0.73733
cg00310139	4301	MLLT4	chr6	168225685	168225686	CGI-N-Shore	TRUE	TRUE	FALSE	1.53208	-0.3404	0.736597	0.442831
cg00310139	653483	MLLT4-AS1	chr6	168225685	168225686	CGI-N-Shore	TRUE	TRUE	FALSE	1.53208	-0.3404	0.736597	0.442831
cg00310145	9223	MAGI1	chr3	65585692	65585693	CGI-S-Shore	FALSE	TRUE	FALSE	3.86132	3.19584	0.934207	0.898824
cg00310588	170572	HTR3C	chr3	183770589	183770590	Non-CGI	TRUE	FALSE	FALSE	0.355386	-1.10316	0.561248	0.331727
cg00310855	738	VPS51	chr11	64879153	64879154	CGI	TRUE	TRUE	FALSE	-1.53268	-2.23712	0.261733	0.177159
cg00310855	7108	TM7SF2	chr11	64879153	64879154	CGI	TRUE	TRUE	FALSE	-1.53268	-2.23712	0.261733	0.177159
cg00310940	6518	SLC2A5	chr1	9129648	9129649	CGI-N-Shore	TRUE	TRUE	FALSE	1.36693	-0.557893	0.711808	0.410745
cg00311751	55809	TRERF1	chr6	42226895	42226896	CGI-N-Shore	FALSE	TRUE	FALSE	4.18784	3.46539	0.947034	0.902052
cg00313914	89796	NAV1	chr1	201618901	201618902	CGI	FALSE	TRUE	FALSE	-0.69881	-1.97494	0.386144	0.210001
cg00314115	NA	NA	chr2	121280002	121280003	CGI	FALSE	FALSE	TRUE	1.75971	0.863075	0.767312	0.636449
cg00315239	NA	NA	chr16	88625101	88625102	CGI	FALSE	TRUE	FALSE	2.57473	1.52586	0.853011	0.7289
cg00315487	131616	TMEM42	chr3	44906755	44906756	CGI-S-Shelf	FALSE	TRUE	FALSE	3.66035	2.73939	0.925648	0.862804
cg00316312	84435	GPR123	chr10	134916087	134916088	CGI	FALSE	TRUE	FALSE	0.969144	0.0590177	0.656937	0.510319
cg00316485	23090	ZNF423	chr16	49789549	49789550	CGI-S-Shore	FALSE	TRUE	FALSE	1.05914	-1.11075	0.66251	0.324422
cg00316759	196993	CT62	chr15	71407484	71407485	CGI	TRUE	FALSE	FALSE	1.67087	1.00003	0.755693	0.661269
cg00316839	NA	NA	chr4	85414135	85414136	CGI	FALSE	FALSE	TRUE	0.156175	-0.88987	0.526655	0.376723
cg00317577	64506	CPEB1	chr15	83239908	83239909	Non-CGI	FALSE	TRUE	FALSE	2.56791	0.77187	0.846336	0.623247
cg00318000	79626	TNFAIP8L2	chr1	151128630	151128631	Non-CGI	TRUE	FALSE	FALSE	0.35772	-0.996648	0.56017	0.336644
cg00318000	100534012	TNFAIP8L2-SCNM1	chr1	151128630	151128631	Non-CGI	TRUE	FALSE	FALSE	0.35772	-0.996648	0.56017	0.336644
cg00319655	306	ANXA3	chr4	79473327	79473328	CGI	FALSE	TRUE	FALSE	0.309257	-0.680176	0.552469	0.389567
cg00320980	NA	NA	chr10	134839587	134839588	CGI-S-Shore	FALSE	FALSE	TRUE	-0.901427	-1.9352	0.350588	0.211687
cg00321288	25834	MGAT4C	chr12	87232692	87232693	Non-CGI	TRUE	FALSE	FALSE	-0.865849	-1.77285	0.356414	0.238704
cg00321901	94137	RP1L1	chr8	10512459	10512460	Non-CGI	TRUE	FALSE	FALSE	-1.11195	-1.85903	0.32222	0.221622
cg00322618	NA	NA	chr5	2759441	2759442	CGI-S-Shore	FALSE	FALSE	TRUE	2.50022	1.40482	0.833451	0.714357
cg00323014	NA	NA	chr10	125928304	125928305	Non-CGI	FALSE	FALSE	TRUE	3.05157	2.07576	0.874382	0.799279
cg00323313	2048	EPHB2	chr1	23054915	23054916	Non-CGI	FALSE	TRUE	FALSE	1.70013	0.427199	0.75941	0.573551
cg00324097	10801	2009-09-01	chr17	75446549	75446550	CGI-N-Shore	TRUE	TRUE	FALSE	0.514765	-2.30826	0.584057	0.181527
cg00325113	10406	WFDC2	chr20	44097716	44097717	CGI-N-Shore	TRUE	FALSE	FALSE	2.97224	1.67237	0.880966	0.749717
cg00326131	6242	RTKN	chr2	74668477	74668478	CGI	TRUE	TRUE	FALSE	2.57614	0.330124	0.851683	0.55268
cg00326161	NA	NA	chr6	74710701	74710702	Non-CGI	FALSE	FALSE	TRUE	0.724313	-0.684029	0.617417	0.39948
cg00326300	NA	NA	chr1	33772032	33772033	CGI-N-Shore	FALSE	FALSE	TRUE	3.14552	1.97226	0.896263	0.784494
cg00326785	9771	RAPGEF5	chr7	22395217	22395218	CGI-N-Shore	FALSE	TRUE	FALSE	3.08528	2.34866	0.887558	0.831835
cg00327577	29108	PYCARD	chr16	31214993	31214994	CGI-S-Shore	TRUE	FALSE	FALSE	3.20956	2.27087	0.896194	0.799198
cg00328058	339451	KLHL17	chr1	901062	901063	CGI-S-Shore	TRUE	TRUE	FALSE	1.8416	1.04496	0.77591	0.667573
cg00328058	84069	PLEKHN1	chr1	901062	901063	CGI-S-Shore	TRUE	TRUE	FALSE	1.8416	1.04496	0.77591	0.667573
cg00328219	23303	KIF13B	chr8	29033680	29033681	Non-CGI	FALSE	TRUE	FALSE	0.899121	-1.049	0.643421	0.334219
cg00328376	8935	SKAP2	chr7	26902685	26902686	CGI-N-Shore	FALSE	TRUE	FALSE	3.09654	1.99775	0.891784	0.790237
cg00328720	2137	EXTL3	chr8	28562890	28562891	CGI-S-Shelf	FALSE	TRUE	FALSE	-0.187163	-1.59511	0.472153	0.257911
cg00328729	56981	PRDM11	chr11	45231175	45231176	CGI	FALSE	TRUE	FALSE	1.461	0.284667	0.731649	0.547848
cg00329300	50848	F11R	chr1	161008462	161008463	CGI	FALSE	TRUE	FALSE	2.88751	1.62395	0.858002	0.72953
cg00329300	100131187	TSTD1	chr1	161008462	161008463	CGI	FALSE	TRUE	FALSE	2.88751	1.62395	0.858002	0.72953
cg00329411	NA	NA	chr5	55881858	55881859	Non-CGI	FALSE	FALSE	TRUE	0.513006	-1.82104	0.58188	0.233068
cg00330518	6497	SKI	chr1	2228160	2228161	CGI	FALSE	TRUE	FALSE	2.64031	1.532	0.854191	0.736834
cg00331101	NA	NA	chr4	184949987	184949988	Non-CGI	FALSE	FALSE	TRUE	1.56954	0.728655	0.742947	0.62175
cg00331616	54737	MPHOSPH8	chr13	20207201	20207202	CGI-N-Shore	TRUE	FALSE	FALSE	1.93927	0.656804	0.78637	0.606105
cg00332509	29123	ANKRD11	chr16	89363830	89363831	CGI	FALSE	TRUE	FALSE	3.1445	0.711853	0.891554	0.611828
cg00332802	NA	NA	chr3	118198779	118198780	Non-CGI	FALSE	FALSE	TRUE	0.637693	-1.26569	0.595596	0.317183
cg00332850	NA	NA	chr8	143202817	143202818	CGI	FALSE	FALSE	TRUE	1.938	0.724413	0.786202	0.615632
cg00332937	NA	NA	chr5	72740460	72740461	CGI	FALSE	FALSE	TRUE	2.91413	0.921471	0.869684	0.630265
cg00333678	NA	NA	chr8	80673874	80673875	CGI-N-Shelf	FALSE	FALSE	TRUE	4.21068	3.53146	0.947861	0.912533
cg00335252	5937	RBMS1	chr2	161245200	161245201	Non-CGI	FALSE	TRUE	FALSE	0.411866	-0.704663	0.570298	0.383241
cg00335908	863	CBFA2T3	chr16	89002930	89002931	CGI-S-Shore	FALSE	TRUE	FALSE	-0.625707	-1.89759	0.396007	0.217881
cg00336150	NA	NA	chr2	118981150	118981151	CGI	FALSE	FALSE	TRUE	-0.866667	-1.55037	0.359953	0.260528
cg00336867	NA	NA	chr2	10857774	10857775	CGI-N-Shelf	FALSE	FALSE	TRUE	0.361412	-1.05227	0.55898	0.331195
cg00337187	NA	NA	chr6	3054716	3054717	CGI-S-Shore	FALSE	FALSE	TRUE	0.0961738	-1.35976	0.512773	0.291671
cg00337916	285987	DLX6-AS1	chr7	96643686	96643687	CGI-S-Shore	TRUE	FALSE	FALSE	3.69879	0.725582	0.925675	0.611872
cg00338391	NA	NA	chr7	1283981	1283982	CGI	FALSE	FALSE	TRUE	-0.716466	-1.76866	0.381877	0.239489
cg00338685	23513	SCRIB	chr8	144883443	144883444	CGI-S-Shore	FALSE	TRUE	FALSE	4.41666	3.7613	0.95474	0.92229
cg00339012	NA	NA	chr2	5865442	5865443	Non-CGI	FALSE	FALSE	TRUE	4.19727	2.80379	0.947329	0.863083
cg00339241	57617	VPS18	chr15	41196012	41196013	CGI-S-Shelf	FALSE	TRUE	FALSE	-0.434314	-1.0508	0.427625	0.333532
cg00339782	10903	MTMR11	chr1	149908099	149908100	Non-CGI	TRUE	TRUE	FALSE	-0.182607	-1.40444	0.469109	0.278332
cg00339913	9796	PHYHIP	chr8	22085227	22085228	CGI-S-Shore	FALSE	TRUE	FALSE	-0.626581	-2.23112	0.40437	0.193543
cg00341042	26033	ATRNL1	chr10	116854499	116854500	CGI-S-Shore	FALSE	TRUE	FALSE	0.470902	-0.840357	0.577226	0.362207
cg00341060	NA	NA	chr1	8377787	8377788	CGI-N-Shore	FALSE	FALSE	TRUE	1.40967	-0.0772521	0.711613	0.491725
cg00341606	6720	SREBF1	chr17	17740405	17740406	CGI	TRUE	FALSE	FALSE	-1.89217	-2.68821	0.215084	0.135066
cg00342358	7049	TGFBR3	chr1	92350112	92350113	CGI-N-Shore	FALSE	TRUE	FALSE	0.0622321	-1.33578	0.5088	0.289208
cg00343127	121260	SLC15A4	chr12	129299088	129299089	CGI	TRUE	TRUE	FALSE	1.4534	-0.45322	0.71038	0.432168
cg00343433	444	ASPH	chr8	62600110	62600111	Non-CGI	FALSE	TRUE	FALSE	1.40511	0.510533	0.719109	0.584677
cg00344411	56999	ADAMTS9	chr3	64547108	64547109	CGI-N-Shore	TRUE	TRUE	FALSE	1.86614	0.384351	0.773209	0.558191
cg00344422	NA	NA	chr13	100149311	100149312	CGI-N-Shore	TRUE	FALSE	FALSE	3.3864	2.60353	0.906882	0.853849
cg00344655	1889	ECE1	chr1	21604592	21604593	Non-CGI	TRUE	TRUE	FALSE	3.23186	2.33953	0.895818	0.816853
cg00345443	NA	NA	chr3	54121778	54121779	CGI	FALSE	FALSE	TRUE	-1.6615	-2.68406	0.249428	0.147205
cg00346376	10723	SLC12A7	chr5	1110089	1110090	CGI-S-Shore	FALSE	TRUE	FALSE	2.40961	1.67466	0.837285	0.745407
cg00346446	79590	MRPL24	chr1	156711439	156711440	CGI-S-Shore	TRUE	FALSE	FALSE	2.54462	1.81776	0.845031	0.766339
cg00346898	100303453	TSNAX-DISC1	chr1	231761721	231761722	CGI-N-Shore	TRUE	TRUE	FALSE	0.0626206	-2.06053	0.509754	0.205084
cg00346898	27185	DISC1	chr1	231761721	231761722	CGI-N-Shore	TRUE	TRUE	FALSE	0.0626206	-2.06053	0.509754	0.205084
cg00347563	54810	GIPC2	chr1	78511600	78511601	CGI	TRUE	FALSE	FALSE	-1.67511	-2.30603	0.245276	0.170058
cg00347643	7532	YWHAG	chr7	75957202	75957203	CGI-N-Shore	FALSE	TRUE	FALSE	3.53315	2.8984	0.917543	0.867962
cg00347746	NA	NA	chr19	48970082	48970083	CGI-N-Shore	FALSE	TRUE	FALSE	-0.574603	-1.79544	0.405492	0.229253
cg00348467	NA	NA	chr17	43222121	43222122	CGI	FALSE	FALSE	TRUE	-1.36655	-2.73523	0.283682	0.132719
cg00348621	100129716	ARRDC3-AS1	chr5	90680542	90680543	CGI-S-Shore	TRUE	TRUE	FALSE	2.04814	1.09557	0.793767	0.673187
cg00348621	57561	ARRDC3	chr5	90680542	90680543	CGI-S-Shore	TRUE	TRUE	FALSE	2.04814	1.09557	0.793767	0.673187
cg00348891	NA	NA	chr13	46251914	46251915	Non-CGI	FALSE	FALSE	TRUE	2.17074	1.39359	0.809102	0.715948
cg00349061	7780	SLC30A2	chr1	26371865	26371866	CGI-N-Shore	FALSE	TRUE	FALSE	0.495647	-0.488078	0.581999	0.424345
cg00349404	85450	ITPRIP	chr10	106100036	106100037	CGI-S-Shore	TRUE	FALSE	FALSE	1.15628	0.232907	0.682864	0.539279
cg00349608	NA	NA	chr17	4520467	4520468	Non-CGI	FALSE	TRUE	FALSE	2.07241	1.20085	0.795964	0.687993
cg00350432	4091	SMAD6	chr15	67065190	67065191	Non-CGI	FALSE	TRUE	FALSE	3.9231	3.06061	0.934462	0.885876
cg00350615	1302	COL11A2	chr6	33141152	33141153	Non-CGI	FALSE	TRUE	FALSE	1.79391	0.681238	0.77019	0.611313
cg00351119	NA	NA	chr6	143836747	143836748	CGI-S-Shelf	FALSE	FALSE	TRUE	1.75503	0.699084	0.762659	0.600753
cg00351472	407011	MIR23B	chr9	97846551	97846552	CGI-S-Shore	TRUE	TRUE	FALSE	3.83364	2.96175	0.93376	0.880501
cg00351472	84909	C9orf3	chr9	97846551	97846552	CGI-S-Shore	TRUE	TRUE	FALSE	3.83364	2.96175	0.93376	0.880501
cg00351750	64754	SMYD3	chr1	246038775	246038776	Non-CGI	FALSE	TRUE	FALSE	3.79589	2.122	0.92969	0.795875
cg00352652	161882	ZFPM1	chr16	88547533	88547534	CGI-S-Shore	FALSE	TRUE	FALSE	3.94672	2.03941	0.935705	0.794875
cg00353923	27044	SND1	chr7	127671044	127671045	CGI	TRUE	TRUE	FALSE	-0.0754379	-1.1024	0.486863	0.321883
cg00353923	64101	LRRC4	chr7	127671044	127671045	CGI	TRUE	TRUE	FALSE	-0.0754379	-1.1024	0.486863	0.321883
cg00354542	100134368	LOC100134368	chr16	434356	434357	CGI-S-Shore	FALSE	TRUE	FALSE	2.21791	0.924463	0.819987	0.65328
cg00354884	29	ABR	chr17	1057541	1057542	CGI-S-Shore	FALSE	TRUE	FALSE	-0.341981	-2.38122	0.445099	0.172067
cg00355286	4313	MMP2	chr16	55525729	55525730	Non-CGI	FALSE	TRUE	FALSE	0.983296	-0.290528	0.661412	0.452077
cg00355829	NA	NA	chr3	128326679	128326680	CGI-N-Shore	FALSE	FALSE	TRUE	0.568269	-0.465633	0.584632	0.416392
cg00356045	54361	WNT4	chr1	22461890	22461891	Non-CGI	FALSE	TRUE	FALSE	3.15479	1.6597	0.893866	0.741766
cg00356131	NA	NA	chr5	72593933	72593934	CGI	FALSE	FALSE	TRUE	4.1005	3.06564	0.94444	0.884662
cg00356361	4772	NFATC1	chr18	77286260	77286261	CGI	TRUE	TRUE	FALSE	-0.691201	-1.63241	0.385811	0.248071
cg00358278	161882	ZFPM1	chr16	88594506	88594507	CGI-N-Shelf	FALSE	TRUE	FALSE	0.310523	-0.553987	0.550781	0.409766
cg00359395	3339	HSPG2	chr1	22228153	22228154	Non-CGI	FALSE	TRUE	FALSE	-0.938244	-1.91834	0.35325	0.223027
cg00360414	219623	TMEM26	chr10	63213391	63213392	CGI	TRUE	TRUE	FALSE	-1.24839	-2.32397	0.302645	0.170278
cg00360474	NA	NA	chr6	37504404	37504405	CGI	FALSE	FALSE	TRUE	-0.999463	-1.61949	0.33765	0.250778
cg00361017	10846	PDE10A	chr6	166073666	166073667	CGI-N-Shore	FALSE	TRUE	FALSE	2.97884	2.19325	0.875268	0.805461
cg00361025	11281	POU6F2	chr7	39451576	39451577	CGI-N-Shore	FALSE	TRUE	FALSE	3.00921	2.09446	0.881038	0.804191
cg00361609	8817	FGF18	chr5	170881793	170881794	CGI-N-Shore	FALSE	TRUE	FALSE	1.69838	0.657923	0.750901	0.603658
cg00362236	NA	NA	chr6	18384365	18384366	CGI-N-Shelf	FALSE	FALSE	TRUE	3.12865	2.04467	0.895017	0.78394
cg00362285	56605	ERO1LB	chr1	236444212	236444213	CGI-N-Shore	FALSE	TRUE	FALSE	1.78838	1.12411	0.770383	0.680685
cg00364016	NA	NA	chr6	10113648	10113649	Non-CGI	FALSE	TRUE	FALSE	-1.63901	-3.23087	0.254368	0.0982303
cg00364304	NA	NA	chr16	79381402	79381403	CGI	FALSE	FALSE	TRUE	1.90576	0.859212	0.783232	0.640529
cg00364339	84303	CHCHD6	chr3	126440043	126440044	Non-CGI	FALSE	TRUE	FALSE	3.5239	1.88127	0.917017	0.783742
cg00364457	114781	BTBD9	chr6	38608738	38608739	CGI-S-Shore	TRUE	FALSE	FALSE	-0.0895136	-0.898629	0.484296	0.356319
cg00364615	4088	SMAD3	chr15	67424723	67424724	Non-CGI	FALSE	TRUE	FALSE	3.09262	2.23407	0.889503	0.817045
cg00364758	54749	EPDR1	chr7	37964310	37964311	CGI-S-Shelf	FALSE	TRUE	FALSE	3.32757	0.760726	0.902711	0.598229
cg00366103	285987	DLX6-AS1	chr7	96645019	96645020	CGI-N-Shore	TRUE	FALSE	FALSE	4.09288	1.7492	0.942732	0.744219
cg00366359	26011	TENM4	chr11	79145542	79145543	CGI-N-Shelf	FALSE	TRUE	FALSE	2.03873	0.650118	0.795474	0.601837
cg00366413	406985	MIR200C	chr12	7072696	7072697	CGI-S-Shore	TRUE	FALSE	FALSE	1.25514	0.603191	0.702141	0.600897
cg00366413	406933	MIR141	chr12	7072696	7072697	CGI-S-Shore	TRUE	FALSE	FALSE	1.25514	0.603191	0.702141	0.600897
cg00367615	100507064	TEX26-AS1	chr13	31480979	31480980	CGI	FALSE	TRUE	FALSE	-0.129897	-2.02437	0.481466	0.208115
cg00367615	84935	MEDAG	chr13	31480979	31480980	CGI	FALSE	TRUE	FALSE	-0.129897	-2.02437	0.481466	0.208115
cg00369181	NA	NA	chr2	438948	438949	CGI	FALSE	FALSE	TRUE	2.02366	0.588728	0.798274	0.595947
cg00369372	6725	SRMS	chr20	62179485	62179486	CGI	TRUE	FALSE	FALSE	1.45314	0.424206	0.729837	0.57212
cg00370179	8900	CCNA1	chr13	37005074	37005075	CGI-S-Shore	TRUE	FALSE	FALSE	-0.579324	-1.28125	0.403403	0.301531
cg00370608	55697	VAC14	chr16	70784519	70784520	Non-CGI	FALSE	TRUE	FALSE	0.636072	-0.0819976	0.604424	0.487679
cg00372908	NA	NA	chr2	174523069	174523070	Non-CGI	FALSE	FALSE	TRUE	3.23662	2.40059	0.901641	0.834706
cg00373148	2779	GNAT1	chr3	50227735	50227736	CGI-N-Shelf	TRUE	FALSE	FALSE	2.46819	1.81906	0.84023	0.775459
cg00373371	5209	PFKFB3	chr10	6275077	6275078	CGI	FALSE	TRUE	FALSE	2.40001	1.54702	0.83367	0.738216
cg00374839	60529	ALX4	chr11	44332454	44332455	CGI	TRUE	FALSE	FALSE	-1.47128	-2.42765	0.273493	0.16103
cg00375132	NA	NA	chr10	22768370	22768371	CGI-S-Shore	FALSE	FALSE	TRUE	2.49453	0.314905	0.843474	0.551212
cg00375457	117854	TRIM6	chr11	5617273	5617274	Non-CGI	TRUE	TRUE	FALSE	-0.0572673	-0.93522	0.490829	0.353249
cg00375457	445372	TRIM6-TRIM34	chr11	5617273	5617274	Non-CGI	TRUE	TRUE	FALSE	-0.0572673	-0.93522	0.490829	0.353249
cg00375457	3048	HBG2	chr11	5617273	5617274	Non-CGI	TRUE	TRUE	FALSE	-0.0572673	-0.93522	0.490829	0.353249
cg00375608	114796	PSMG3-AS1	chr7	1607787	1607788	CGI	TRUE	TRUE	FALSE	3.08607	0.75839	0.887348	0.607585
cg00375608	84262	PSMG3	chr7	1607787	1607788	CGI	TRUE	TRUE	FALSE	3.08607	0.75839	0.887348	0.607585
cg00375691	196047	EMX2OS	chr10	119296942	119296943	CGI	FALSE	TRUE	FALSE	-1.21342	-2.88599	0.309539	0.125935
cg00376022	NA	NA	chr7	19183880	19183881	CGI	TRUE	FALSE	FALSE	1.10352	-1.62452	0.66701	0.267768
cg00376357	NA	NA	chr4	10461465	10461466	CGI-S-Shore	FALSE	FALSE	TRUE	3.09831	2.45925	0.892293	0.840223
cg00376979	NA	NA	chr21	34350727	34350728	CGI-N-Shore	FALSE	FALSE	TRUE	2.1061	0.762723	0.807479	0.62043
cg00377358	63930	LOC63930	chr20	61639277	61639278	CGI	TRUE	FALSE	FALSE	-0.59263	-2.60067	0.406226	0.1458
cg00377358	128408	BHLHE23	chr20	61639277	61639278	CGI	TRUE	FALSE	FALSE	-0.59263	-2.60067	0.406226	0.1458
cg00377497	23087	TRIM35	chr8	27167110	27167111	CGI-N-Shore	TRUE	TRUE	FALSE	0.295135	-1.36837	0.549279	0.28396
cg00377497	2185	PTK2B	chr8	27167110	27167111	CGI-N-Shore	TRUE	TRUE	FALSE	0.295135	-1.36837	0.549279	0.28396
cg00378158	9215	LARGE	chr22	34314305	34314306	CGI-N-Shore	FALSE	TRUE	FALSE	3.38724	2.06652	0.909795	0.795157
cg00379648	100287944	LOC100287944	chr12	106979451	106979452	CGI	FALSE	TRUE	FALSE	-0.522032	-1.76219	0.418195	0.254193
cg00379648	5992	RFX4	chr12	106979451	106979452	CGI	FALSE	TRUE	FALSE	-0.522032	-1.76219	0.418195	0.254193
cg00380924	6196	RPS6KA2	chr6	166967377	166967378	Non-CGI	FALSE	TRUE	FALSE	1.74791	-0.0830626	0.75859	0.487805
cg00381442	339145	FAM92B	chr16	85146178	85146179	Non-CGI	TRUE	FALSE	FALSE	1.78369	1.03488	0.768948	0.661012
cg00382572	3784	KCNQ1	chr11	2574042	2574043	CGI	FALSE	TRUE	FALSE	2.30506	1.57927	0.828943	0.73415
cg00382930	NA	NA	chr16	87100229	87100230	CGI-S-Shore	FALSE	FALSE	TRUE	3.04306	2.31591	0.890534	0.829201
cg00383763	NA	NA	chr1	202682124	202682125	CGI-S-Shelf	FALSE	FALSE	TRUE	1.88191	1.15948	0.783607	0.687267
cg00383793	9254	CACNA2D2	chr3	50488162	50488163	CGI	FALSE	TRUE	FALSE	0.570138	-0.878132	0.592849	0.359401
cg00384653	100302118	MIR1286	chr22	20237197	20237198	Non-CGI	TRUE	TRUE	FALSE	2.78827	1.9176	0.867893	0.77774
cg00384653	65078	RTN4R	chr22	20237197	20237198	Non-CGI	TRUE	TRUE	FALSE	2.78827	1.9176	0.867893	0.77774
cg00386586	NA	NA	chr13	114917527	114917528	CGI	FALSE	FALSE	TRUE	4.35321	3.22178	0.952881	0.894827
cg00387115	NA	NA	chr12	115889598	115889599	CGI-N-Shore	FALSE	FALSE	TRUE	-1.47584	-2.1236	0.269067	0.192853
cg00387357	285489	DOK7	chr4	3484049	3484050	CGI-N-Shore	FALSE	TRUE	FALSE	3.18471	2.29561	0.896296	0.81912
cg00387445	81609	SNX27	chr1	151584078	151584079	CGI-N-Shore	TRUE	FALSE	FALSE	-1.90138	-2.77641	0.214752	0.134092
cg00387551	63976	PRDM16	chr1	3011304	3011305	CGI-S-Shore	FALSE	TRUE	FALSE	4.23041	2.66557	0.948642	0.854941
cg00388287	NA	NA	chr2	23358444	23358445	Non-CGI	FALSE	FALSE	TRUE	-0.290366	-1.58724	0.456017	0.253712
cg00388471	283951	C16orf91	chr16	1475871	1475872	CGI-N-Shore	FALSE	TRUE	FALSE	3.52927	2.5981	0.913864	0.846529
cg00388871	80331	DNAJC5	chr20	62530407	62530408	CGI-S-Shelf	FALSE	TRUE	FALSE	2.4588	1.6138	0.841763	0.74355
cg00390253	10991	SLC38A3	chr3	50241300	50241301	CGI-N-Shore	TRUE	FALSE	FALSE	1.35142	0.580635	0.712779	0.597307
cg00390259	NA	NA	chr13	106650270	106650271	Non-CGI	FALSE	FALSE	TRUE	2.46242	0.395749	0.840432	0.559246
cg00390724	NA	NA	chr3	18484742	18484743	CGI-N-Shore	FALSE	FALSE	TRUE	3.81698	3.14627	0.932614	0.89375
cg00390784	340156	MYLK4	chr6	2682491	2682492	CGI-N-Shelf	FALSE	TRUE	FALSE	3.90948	3.03779	0.93434	0.878006
cg00391479	NA	NA	chr19	1313527	1313528	CGI-S-Shore	FALSE	FALSE	TRUE	-1.21608	-2.29937	0.306638	0.173328
cg00393193	54540	FAM193B	chr5	176959146	176959147	Non-CGI	TRUE	TRUE	FALSE	3.32882	2.60258	0.908037	0.853726
cg00393415	134549	SHROOM1	chr5	132163787	132163788	CGI-S-Shore	TRUE	TRUE	FALSE	3.08166	2.28873	0.892018	0.821398
cg00394247	NA	NA	chr8	41249192	41249193	Non-CGI	FALSE	FALSE	TRUE	3.86258	3.21	0.934494	0.890467
cg00394581	57707	TLDC1	chr16	84512362	84512363	Non-CGI	FALSE	TRUE	FALSE	1.25126	-0.0632645	0.698651	0.491219
cg00394718	NA	NA	chr8	120684921	120684922	CGI	FALSE	FALSE	TRUE	4.82018	2.60438	0.963534	0.794003
cg00395063	23365	ARHGEF12	chr11	120210293	120210294	CGI-S-Shore	FALSE	TRUE	FALSE	0.597403	-0.541082	0.599838	0.408954
cg00396427	55114	ARHGAP17	chr16	25023604	25023605	CGI-N-Shelf	FALSE	TRUE	FALSE	4.46383	0.699875	0.953534	0.594315
cg00396667	5307	PITX1	chr5	134364387	134364388	CGI	FALSE	TRUE	FALSE	4.79755	3.9448	0.96345	0.929338
cg00396865	84973	SNHG7	chr9	139620597	139620598	CGI-N-Shore	TRUE	TRUE	FALSE	3.14658	2.47133	0.896788	0.841275
cg00396865	677824	SNORA43	chr9	139620597	139620598	CGI-N-Shore	TRUE	TRUE	FALSE	3.14658	2.47133	0.896788	0.841275
cg00396910	NA	NA	chr2	166563180	166563181	Non-CGI	FALSE	FALSE	TRUE	3.66944	2.90109	0.926368	0.876854
cg00397575	51285	RASL12	chr15	65359932	65359933	CGI-N-Shore	FALSE	TRUE	FALSE	-1.4688	-2.67937	0.27447	0.139132
cg00398048	175	AGA	chr4	178364342	178364343	CGI-S-Shore	TRUE	FALSE	FALSE	0.668762	-0.93722	0.606135	0.348594
cg00398764	NA	NA	chr15	37402637	37402638	CGI	FALSE	FALSE	TRUE	1.78945	-0.292627	0.76693	0.45164
cg00400992	10184	LHFPL2	chr5	77923936	77923937	Non-CGI	FALSE	TRUE	FALSE	3.02436	1.53714	0.887901	0.733237
cg00401433	23414	ZFPM2	chr8	106674239	106674240	Non-CGI	FALSE	TRUE	FALSE	1.94397	1.04863	0.780543	0.666605
cg00401463	282973	JAKMIP3	chr10	133978450	133978451	CGI-N-Shore	FALSE	TRUE	FALSE	0.848005	-0.0584596	0.635023	0.491266
cg00401471	10653	SPINT2	chr19	38782834	38782835	Non-CGI	FALSE	TRUE	FALSE	3.49261	2.34443	0.917469	0.825456
cg00401691	100507582	BHLHE40-AS1	chr3	5018239	5018240	CGI-N-Shore	FALSE	TRUE	FALSE	4.09814	3.39691	0.943507	0.902992
cg00402222	9509	ADAMTS2	chr5	178622572	178622573	CGI-N-Shore	FALSE	TRUE	FALSE	3.44104	2.58569	0.911715	0.834492
cg00402516	53615	MBD3	chr19	1580504	1580505	CGI	FALSE	TRUE	FALSE	1.72936	1.08474	0.761029	0.673684
cg00402533	57520	HECW2	chr2	197458695	197458696	CGI-S-Shore	TRUE	FALSE	FALSE	-0.308727	-1.23511	0.448503	0.301922
cg00403498	9374	PPT2	chr6	32119923	32119924	CGI-S-Shore	TRUE	TRUE	FALSE	0.276986	-1.16507	0.546715	0.313703
cg00403498	80863	PRRT1	chr6	32119923	32119924	CGI-S-Shore	TRUE	TRUE	FALSE	0.276986	-1.16507	0.546715	0.313703
cg00403498	100532746	PPT2-EGFL8	chr6	32119923	32119924	CGI-S-Shore	TRUE	TRUE	FALSE	0.276986	-1.16507	0.546715	0.313703
cg00403579	153090	DAB2IP	chr9	124533992	124533993	CGI-N-Shore	FALSE	TRUE	FALSE	3.99313	3.05914	0.939931	0.88504
cg00403616	NA	NA	chr8	591688	591689	CGI-N-Shore	TRUE	FALSE	FALSE	4.61108	3.62632	0.959926	0.915386
cg00405677	9421	HAND1	chr5	153858102	153858103	CGI	TRUE	FALSE	FALSE	-2.08984	-2.77049	0.194855	0.131853
cg00405688	399823	FOXI2	chr10	129534182	129534183	CGI	TRUE	FALSE	FALSE	-1.14822	-1.97209	0.313698	0.204137
cg00406023	220323	OAF	chr11	120090023	120090024	Non-CGI	FALSE	TRUE	FALSE	3.58035	1.53665	0.922134	0.7358
cg00406211	2869	GRK5	chr10	121077022	121077023	Non-CGI	FALSE	TRUE	FALSE	2.88999	0.253593	0.874293	0.543046
cg00406338	79716	NPEPL1	chr20	57267528	57267529	CGI-N-Shore	TRUE	TRUE	FALSE	2.90167	1.416	0.876614	0.709976
cg00406976	27006	FGF22	chr19	638588	638589	CGI-N-Shore	TRUE	FALSE	FALSE	0.567594	-0.169147	0.590898	0.474799
cg00407062	25792	CIZ1	chr9	130964374	130964375	CGI-N-Shore	TRUE	TRUE	FALSE	2.11625	0.776257	0.80542	0.62789
cg00407062	1759	DNM1	chr9	130964374	130964375	CGI-N-Shore	TRUE	TRUE	FALSE	2.11625	0.776257	0.80542	0.62789
cg00407468	57706	DENND1A	chr9	126692955	126692956	CGI-S-Shore	TRUE	FALSE	FALSE	-0.0512792	-0.766964	0.491918	0.381814
cg00407867	2201	FBN2	chr5	127640424	127640425	Non-CGI	FALSE	TRUE	FALSE	3.94963	2.84288	0.937787	0.862427
cg00408315	22821	RASA3	chr13	114886700	114886701	CGI-S-Shore	FALSE	TRUE	FALSE	4.51925	3.15652	0.957373	0.88698
cg00409049	NA	NA	chr2	118980919	118980920	CGI-N-Shore	FALSE	FALSE	TRUE	1.18434	0.306366	0.687001	0.550852
cg00409434	5581	PRKCE	chr2	46414317	46414318	Non-CGI	FALSE	TRUE	FALSE	3.57224	0.385869	0.909934	0.557331
cg00409658	57224	NHSL1	chr6	138744549	138744550	CGI-N-Shore	FALSE	TRUE	FALSE	2.38494	0.864511	0.832633	0.636894
cg00409844	100506658	OCLN	chr5	68798649	68798650	Non-CGI	TRUE	TRUE	FALSE	2.065	0.900324	0.795385	0.636911
cg00410926	730112	FAM166B	chr9	35563534	35563535	Non-CGI	FALSE	TRUE	FALSE	1.14788	-0.634558	0.681999	0.393608
cg00411072	3213	HOXB3	chr17	46660940	46660941	CGI-S-Shore	TRUE	TRUE	FALSE	4.38312	3.65981	0.953687	0.922158
cg00411358	56241	SUSD2	chr22	24577142	24577143	Non-CGI	TRUE	FALSE	FALSE	1.2174	0.51061	0.695461	0.584386
cg00411697	116519	APOA5	chr11	116663321	116663322	CGI-S-Shore	TRUE	FALSE	FALSE	2.0521	0.869222	0.793907	0.634773
cg00412772	90522	YIF1B	chr19	38794845	38794846	CGI-N-Shore	TRUE	TRUE	FALSE	2.96921	2.11405	0.882513	0.804225
cg00412772	64073	C19orf33	chr19	38794845	38794846	CGI-N-Shore	TRUE	TRUE	FALSE	2.96921	2.11405	0.882513	0.804225
cg00413352	NA	NA	chr1	2847213	2847214	CGI	FALSE	FALSE	TRUE	0.855173	0.087969	0.637911	0.516677
cg00413838	NA	NA	chr8	49804177	49804178	Non-CGI	FALSE	FALSE	TRUE	-0.304046	-1.57881	0.452823	0.255127
cg00414093	NA	NA	chr16	87584426	87584427	CGI	FALSE	FALSE	TRUE	1.02197	0.205282	0.665799	0.537322
cg00415704	56963	RGMA	chr15	93630536	93630537	CGI-N-Shore	FALSE	TRUE	FALSE	2.50399	1.74879	0.844674	0.759918
cg00415993	2151	F2RL2	chr5	75919188	75919189	Non-CGI	TRUE	TRUE	FALSE	-1.43294	-2.102	0.280514	0.198865
cg00415993	10788	IQGAP2	chr5	75919188	75919189	Non-CGI	TRUE	TRUE	FALSE	-1.43294	-2.102	0.280514	0.198865
cg00416206	NA	NA	chr5	54015681	54015682	Non-CGI	FALSE	FALSE	TRUE	3.66796	0.563582	0.926189	0.578872
cg00416645	3488	IGFBP5	chr2	217561367	217561368	CGI-S-Shore	TRUE	FALSE	FALSE	3.29465	2.11417	0.904981	0.809841
cg00416710	NA	NA	chr16	29196027	29196028	CGI-N-Shore	FALSE	TRUE	FALSE	3.86217	2.94551	0.933666	0.880204
cg00417094	919	CD247	chr1	167417043	167417044	Non-CGI	FALSE	TRUE	FALSE	0.13989	-0.493405	0.522826	0.419005
cg00417131	135295	SRSF12	chr6	89828674	89828675	CGI-S-Shore	TRUE	FALSE	FALSE	3.30461	2.55431	0.905715	0.844318
cg00417304	56981	PRDM11	chr11	45124456	45124457	CGI-S-Shore	FALSE	TRUE	FALSE	-1.21649	-2.11085	0.307014	0.189717
cg00417823	2775	GNAO1	chr16	56330268	56330269	Non-CGI	FALSE	TRUE	FALSE	2.78066	2	0.865154	0.789577
cg00418027	56033	BARX1	chr9	96716998	96716999	CGI	TRUE	TRUE	FALSE	-0.194119	-1.21053	0.46805	0.308688
cg00418150	60529	ALX4	chr11	44327869	44327870	CGI	FALSE	TRUE	FALSE	3.69951	1.9831	0.927299	0.773897
cg00418163	160335	TMTC2	chr12	83476631	83476632	Non-CGI	FALSE	TRUE	FALSE	0.0573504	-0.703564	0.509791	0.387623
cg00418282	NA	NA	chr5	2740132	2740133	CGI	FALSE	FALSE	TRUE	-1.46759	-2.61145	0.272796	0.143283
cg00418303	79000	AUNIP	chr1	26183261	26183262	CGI-N-Shelf	FALSE	TRUE	FALSE	4.29947	3.66374	0.95093	0.92352
cg00418999	NA	NA	chr20	10657937	10657938	CGI-S-Shelf	FALSE	FALSE	TRUE	3.99499	3.36389	0.940274	0.905947
cg00420450	55124	PIWIL2	chr8	22132641	22132642	CGI	TRUE	FALSE	FALSE	2.74283	1.91876	0.860268	0.776176
cg00420568	53358	SHC3	chr9	91794904	91794905	CGI-S-Shore	TRUE	FALSE	FALSE	-1.42412	-2.23909	0.278078	0.184528
cg00421693	25816	TNFAIP8	chr5	118689293	118689294	CGI-N-Shore	FALSE	TRUE	FALSE	3.39145	2.54609	0.90478	0.837418
cg00421846	NA	NA	chr6	41340293	41340294	CGI	FALSE	FALSE	TRUE	1.58492	0.384346	0.738511	0.561983
cg00422311	NA	NA	chr2	161395263	161395264	Non-CGI	FALSE	FALSE	TRUE	3.11263	2.36377	0.893512	0.82919
cg00422932	7748	ZNF195	chr11	3402000	3402001	CGI-S-Shore	TRUE	FALSE	FALSE	2.5815	1.71197	0.846878	0.761712
cg00422932	650368	LOC650368	chr11	3402000	3402001	CGI-S-Shore	TRUE	FALSE	FALSE	2.5815	1.71197	0.846878	0.761712
cg00423035	222255	ATXN7L1	chr7	105319486	105319487	CGI	TRUE	TRUE	FALSE	1.2923	-1.4355	0.697785	0.278188
cg00423039	NA	NA	chr1	156597679	156597680	CGI-S-Shore	FALSE	FALSE	TRUE	1.94567	1.26824	0.789878	0.698252
cg00423487	80700	UBXN6	chr19	4455957	4455958	CGI-N-Shore	TRUE	TRUE	FALSE	-1.53832	-2.41038	0.259518	0.160659
cg00423597	57648	KIAA1522	chr1	33235531	33235532	CGI-N-Shore	FALSE	TRUE	FALSE	4.89161	1.8432	0.966965	0.76115
cg00423598	NA	NA	chr7	156296491	156296492	CGI-N-Shore	FALSE	FALSE	TRUE	1.85494	0.665033	0.778154	0.606013
cg00425078	NA	NA	chr16	4230255	4230256	CGI-N-Shelf	FALSE	FALSE	TRUE	3.79541	2.29593	0.928979	0.817055
cg00425636	284266	SIGLEC15	chr18	43404545	43404546	Non-CGI	TRUE	FALSE	FALSE	3.0028	1.88693	0.882846	0.763958
cg00425764	4629	MYH11	chr16	15949616	15949617	CGI-N-Shore	FALSE	TRUE	FALSE	1.51904	0.566794	0.730848	0.588182
cg00426377	79729	SH3D21	chr1	36785859	36785860	CGI-N-Shore	FALSE	TRUE	FALSE	2.8296	1.49985	0.874678	0.734486
cg00426720	4929	NR4A2	chr2	157187204	157187205	CGI-S-Shore	TRUE	TRUE	FALSE	3.11313	2.23055	0.886391	0.807313
cg00426822	23499	MACF1	chr1	39546536	39546537	CGI-N-Shore	TRUE	FALSE	FALSE	-0.61206	-1.45598	0.397167	0.270027
cg00427150	22821	RASA3	chr13	114770568	114770569	CGI	FALSE	TRUE	FALSE	3.95161	2.49586	0.937919	0.829043
cg00427604	54947	LPCAT2	chr16	55542751	55542752	CGI-N-Shore	TRUE	FALSE	FALSE	4.06579	1.99072	0.941826	0.776671
cg00428179	220929	ZNF438	chr10	31322131	31322132	CGI-S-Shore	TRUE	FALSE	FALSE	4.16032	2.0574	0.945963	0.78042
cg00428382	NA	NA	chr4	124427390	124427391	CGI	FALSE	FALSE	TRUE	1.36776	-0.797601	0.713237	0.385728
cg00428526	57533	TBC1D14	chr4	7031099	7031100	CGI-S-Shelf	FALSE	TRUE	FALSE	4.10794	3.46256	0.943552	0.913719
cg00430287	2444	FRK	chr6	116382876	116382877	Non-CGI	TRUE	FALSE	FALSE	2.7307	1.71615	0.858928	0.742504
cg00430542	NA	NA	chr16	73098732	73098733	CGI-S-Shore	FALSE	FALSE	TRUE	2.81704	1.10564	0.862994	0.669011
cg00431673	10395	DLC1	chr8	12974448	12974449	Non-CGI	TRUE	TRUE	FALSE	3.77274	2.76111	0.931244	0.859004
cg00431699	5013	OTX1	chr2	63278831	63278832	CGI	FALSE	TRUE	FALSE	1.31168	0.251683	0.705644	0.542985
cg00431835	NA	NA	chr16	86796158	86796159	CGI-S-Shore	FALSE	FALSE	TRUE	4.02167	2.80514	0.941084	0.864849
cg00432659	NA	NA	chr18	11151283	11151284	CGI-S-Shore	FALSE	FALSE	TRUE	3.49216	2.55794	0.916258	0.846888
cg00433861	220164	DOK6	chr18	67070170	67070171	CGI	FALSE	TRUE	FALSE	1.62871	0.959448	0.744711	0.655922
cg00434119	1608	DGKG	chr3	186080868	186080869	CGI-S-Shore	TRUE	FALSE	FALSE	0.698701	-0.985696	0.613452	0.368561
cg00435063	5799	PTPRN2	chr7	157454207	157454208	CGI-S-Shore	FALSE	TRUE	FALSE	1.98356	0.835406	0.785881	0.634696
cg00435245	NA	NA	chr2	5812420	5812421	CGI-N-Shore	FALSE	FALSE	TRUE	2.40875	1.16207	0.837672	0.688342
cg00435616	84310	C7orf50	chr7	1080473	1080474	CGI-S-Shore	FALSE	TRUE	FALSE	1.95049	0.149361	0.782576	0.52283
cg00435692	79875	THSD4	chr15	71999487	71999488	Non-CGI	FALSE	TRUE	FALSE	1.78808	0.664527	0.772899	0.604454
cg00435723	1013	CDH15	chr16	89245659	89245660	CGI	FALSE	TRUE	FALSE	3.11445	1.95889	0.89331	0.788691
cg00436219	NA	NA	chr3	126397072	126397073	CGI-N-Shore	FALSE	FALSE	TRUE	2.1508	1.2398	0.79742	0.691373
cg00436496	NA	NA	chr15	96885119	96885120	CGI	FALSE	FALSE	TRUE	2.17871	0.380476	0.799727	0.554274
cg00437360	9953	HS3ST3B1	chr17	14213579	14213580	CGI	FALSE	TRUE	FALSE	3.0752	1.80572	0.885482	0.770276
cg00437864	54971	BANP	chr16	87992508	87992509	CGI-S-Shore	TRUE	TRUE	FALSE	3.15863	1.24613	0.897487	0.682945
cg00438026	4795	NFKBIL1	chr6	31513267	31513268	CGI-S-Shelf	TRUE	TRUE	FALSE	1.00791	0.337592	0.663958	0.55507
cg00438026	100532737	ATP6V1G2-DDX39B	chr6	31513267	31513268	CGI-S-Shelf	TRUE	TRUE	FALSE	1.00791	0.337592	0.663958	0.55507
cg00438026	534	ATP6V1G2	chr6	31513267	31513268	CGI-S-Shelf	TRUE	TRUE	FALSE	1.00791	0.337592	0.663958	0.55507
cg00438309	55700	MAP7D1	chr1	36620222	36620223	CGI-N-Shore	TRUE	FALSE	FALSE	4.14395	3.38539	0.945137	0.906873
cg00438309	27095	TRAPPC3	chr1	36620222	36620223	CGI-N-Shore	TRUE	FALSE	FALSE	4.14395	3.38539	0.945137	0.906873
cg00438952	NA	NA	chr3	177149136	177149137	Non-CGI	FALSE	FALSE	TRUE	2.0964	1.4233	0.804291	0.718569
cg00439089	1277	COL1A1	chr17	48263150	48263151	Non-CGI	TRUE	TRUE	FALSE	2.08756	0.365346	0.783317	0.556964
cg00439709	135228	CD109	chr6	74404526	74404527	CGI-N-Shore	TRUE	TRUE	FALSE	1.92588	1.05592	0.78501	0.657437
cg00439790	4035	LRP1	chr12	57532315	57532316	Non-CGI	FALSE	TRUE	FALSE	0.339071	-0.62453	0.554353	0.396803
cg00442258	29075	LINC00652	chr20	18775549	18775550	CGI-S-Shore	TRUE	FALSE	FALSE	3.09261	2.31525	0.889946	0.821244
cg00442258	100270804	LOC100270804	chr20	18775549	18775550	CGI-S-Shore	TRUE	FALSE	FALSE	3.09261	2.31525	0.889946	0.821244
cg00442430	951	CD37	chr19	49841458	49841459	CGI	FALSE	TRUE	FALSE	3.59635	2.36507	0.91502	0.822918
cg00443516	5590	PRKCZ	chr1	2061836	2061837	CGI-S-Shore	FALSE	TRUE	FALSE	2.13841	1.39106	0.810466	0.705538
cg00443797	196051	PPAPDC1A	chr10	122349232	122349233	Non-CGI	FALSE	TRUE	FALSE	1.74185	0.796045	0.763342	0.630137
cg00443971	79804	HAND2-AS1	chr4	174451398	174451399	CGI	TRUE	FALSE	FALSE	-2.40905	-3.12967	0.167712	0.103629
cg00443971	9464	HAND2	chr4	174451398	174451399	CGI	TRUE	FALSE	FALSE	-2.40905	-3.12967	0.167712	0.103629
cg00443981	124773	C17orf64	chr17	58499679	58499680	CGI-S-Shore	TRUE	FALSE	FALSE	4.62843	3.74825	0.960253	0.926525
cg00444898	2122	MECOM	chr3	169100001	169100002	Non-CGI	TRUE	TRUE	FALSE	3.60171	2.58424	0.920648	0.847575
cg00445232	4088	SMAD3	chr15	67460571	67460572	CGI-S-Shelf	FALSE	TRUE	FALSE	3.47085	0.29371	0.910182	0.535597
cg00446046	NA	NA	chr3	187686918	187686919	Non-CGI	FALSE	FALSE	TRUE	2.93076	2.22589	0.881634	0.816187
cg00446123	84619	ZGPAT	chr20	62367888	62367889	CGI-S-Shore	TRUE	TRUE	FALSE	4.79487	4.11528	0.964586	0.942175
cg00446123	54923	LIME1	chr20	62367888	62367889	CGI-S-Shore	TRUE	TRUE	FALSE	4.79487	4.11528	0.964586	0.942175
cg00446697	81532	MOB2	chr11	1542313	1542314	CGI-S-Shelf	FALSE	TRUE	FALSE	3.30274	2.04298	0.8996	0.790148
cg00448752	NA	NA	chr1	101775370	101775371	CGI	FALSE	FALSE	TRUE	-0.186862	-2.27854	0.468235	0.182984
cg00448761	5990	RFX2	chr19	6066102	6066103	Non-CGI	FALSE	TRUE	FALSE	0.217013	-0.710472	0.531859	0.386412
cg00448814	222698	NKAPL	chr6	28227482	28227483	CGI	TRUE	FALSE	FALSE	1.36709	0.657752	0.713108	0.608075
cg00448814	387032	ZKSCAN4	chr6	28227482	28227483	CGI	TRUE	FALSE	FALSE	1.36709	0.657752	0.713108	0.608075
cg00448889	79664	NARG2	chr15	60714492	60714493	Non-CGI	FALSE	TRUE	FALSE	2.18742	1.3332	0.816925	0.711077
cg00449067	10203	CALCRL	chr2	188269443	188269444	Non-CGI	FALSE	TRUE	FALSE	1.96253	0.903391	0.790655	0.639292
cg00449201	199800	ADM5	chr19	50193437	50193438	CGI	TRUE	TRUE	FALSE	-0.330169	-1.34391	0.444112	0.287055
cg00449201	126129	CPT1C	chr19	50193437	50193438	CGI	TRUE	TRUE	FALSE	-0.330169	-1.34391	0.444112	0.287055
cg00449608	11250	GPR45	chr2	105856709	105856710	CGI-N-Shore	TRUE	FALSE	FALSE	3.06244	1.53642	0.886163	0.732258
cg00449767	90332	EXOC3L2	chr19	45737603	45737604	CGI	TRUE	FALSE	FALSE	0.272698	-0.728854	0.546217	0.399439
cg00450651	100505636	LINC01024	chr5	139485902	139485903	CGI-N-Shore	TRUE	TRUE	FALSE	1.13394	-0.244146	0.680457	0.460661
cg00450784	100287944	LOC100287944	chr12	106979062	106979063	CGI	FALSE	TRUE	FALSE	-0.189826	-1.80832	0.472562	0.258037
cg00450784	5992	RFX4	chr12	106979062	106979063	CGI	FALSE	TRUE	FALSE	-0.189826	-1.80832	0.472562	0.258037
cg00450979	5424	POLD1	chr19	50910248	50910249	CGI-N-Shore	FALSE	TRUE	FALSE	3.80518	3.09806	0.931166	0.87919
cg00451105	NA	NA	chr13	29104082	29104083	CGI-N-Shore	FALSE	FALSE	TRUE	3.53321	1.8207	0.916052	0.755618
cg00451491	NA	NA	chr2	157528744	157528745	Non-CGI	FALSE	FALSE	TRUE	1.83334	0.757922	0.777321	0.62361
cg00451642	84465	MEGF11	chr15	66546935	66546936	CGI	TRUE	FALSE	FALSE	0.969539	-0.987894	0.64964	0.354728
cg00452039	51422	PRKAG2	chr7	151571753	151571754	CGI-N-Shore	FALSE	TRUE	FALSE	1.60524	0.908004	0.74856	0.644192
cg00452949	440952	EIF1B-AS1	chr3	40267681	40267682	Non-CGI	FALSE	TRUE	FALSE	2.8658	1.89628	0.874709	0.778013
cg00452949	25924	MYRIP	chr3	40267681	40267682	Non-CGI	FALSE	TRUE	FALSE	2.8658	1.89628	0.874709	0.778013
cg00453735	NA	NA	chr10	33321730	33321731	Non-CGI	FALSE	FALSE	TRUE	-0.407489	-1.25698	0.432127	0.300652
cg00453938	NA	NA	chr20	39320532	39320533	CGI-S-Shore	FALSE	FALSE	TRUE	3.33847	2.49926	0.907439	0.833995
cg00454042	115727	RASGRP4	chr19	38908423	38908424	CGI-N-Shore	FALSE	TRUE	FALSE	-1.84773	-2.69088	0.231719	0.139129
cg00454274	148979	GLIS1	chr1	54200587	54200588	CGI-S-Shore	TRUE	FALSE	FALSE	2.95852	0.769266	0.880362	0.625259
cg00454734	NA	NA	chr7	44183410	44183411	CGI-N-Shore	FALSE	FALSE	TRUE	3.77188	2.45146	0.930212	0.836721
cg00454770	3983	ABLIM1	chr10	116286974	116286975	CGI-S-Shore	TRUE	TRUE	FALSE	0.14554	-0.924906	0.524374	0.350335
cg00455327	91768	CABLES1	chr18	20714217	20714218	CGI-N-Shore	TRUE	FALSE	FALSE	3.06554	1.79943	0.882296	0.762301
cg00455796	64748	LPPR2	chr19	11475827	11475828	CGI-S-Shelf	FALSE	TRUE	FALSE	3.19944	1.42932	0.897451	0.712777
cg00456216	6548	SLC9A1	chr1	27427064	27427065	CGI	FALSE	TRUE	FALSE	1.64855	0.24463	0.750005	0.538274
cg00456326	NA	NA	chr2	19560467	19560468	CGI-S-Shore	FALSE	FALSE	TRUE	4.13184	2.90023	0.945286	0.874191
cg00456593	53841	CDHR5	chr11	624781	624782	CGI	TRUE	TRUE	FALSE	2.98044	2.10825	0.883862	0.795827
cg00457195	1137	CHRNA4	chr20	61979272	61979273	CGI	FALSE	TRUE	FALSE	2.16055	0.993182	0.811627	0.658507
cg00458449	23192	ATG4B	chr2	242605751	242605752	CGI	TRUE	TRUE	FALSE	4.03475	2.30561	0.936927	0.7895
cg00458754	11155	LDB3	chr10	88427813	88427814	Non-CGI	TRUE	TRUE	FALSE	2.07565	0.75087	0.794513	0.623229
cg00458949	259283	MDS2	chr1	23942134	23942135	CGI-N-Shelf	FALSE	TRUE	FALSE	1.46033	0.636936	0.729856	0.605378
cg00459116	100533111	ZNF670-ZNF695	chr1	247112228	247112229	CGI-S-Shelf	FALSE	TRUE	FALSE	2.32406	1.33812	0.829728	0.713473
cg00459116	57116	ZNF695	chr1	247112228	247112229	CGI-S-Shelf	FALSE	TRUE	FALSE	2.32406	1.33812	0.829728	0.713473
cg00459232	928	CD9	chr12	6309025	6309026	CGI	TRUE	FALSE	FALSE	-0.618007	-1.74043	0.398262	0.242435
cg00459445	113263	GLCCI1	chr7	8126369	8126370	Non-CGI	FALSE	TRUE	FALSE	2.11088	1.40839	0.806451	0.721006
cg00459898	NA	NA	chr2	241912309	241912310	Non-CGI	FALSE	FALSE	TRUE	4.0463	2.04265	0.942045	0.79181
cg00460322	NA	NA	chr13	112980649	112980650	CGI	FALSE	FALSE	TRUE	-0.499398	-1.51904	0.415956	0.264959
cg00460436	100529144	CORO7-PAM16	chr16	4401729	4401730	CGI-S-Shore	TRUE	TRUE	FALSE	-0.785368	-2.26854	0.375241	0.178764
cg00460436	51025	PAM16	chr16	4401729	4401730	CGI-S-Shore	TRUE	TRUE	FALSE	-0.785368	-2.26854	0.375241	0.178764
cg00460916	3682	ITGAE	chr17	3698239	3698240	CGI-S-Shore	FALSE	TRUE	FALSE	0.270415	-0.526487	0.545195	0.415035
cg00461236	NA	NA	chr16	86704016	86704017	CGI	FALSE	FALSE	TRUE	3.94844	2.54315	0.938629	0.840616
cg00462430	57568	SIPA1L2	chr1	232608508	232608509	Non-CGI	FALSE	TRUE	FALSE	2.49535	0.717365	0.841977	0.610541
cg00463491	NA	NA	chr3	177914725	177914726	Non-CGI	FALSE	FALSE	TRUE	4.13902	1.71117	0.94481	0.739426
cg00463767	5013	OTX1	chr2	63282043	63282044	CGI-S-Shore	FALSE	TRUE	FALSE	0.357626	-0.364014	0.560433	0.438783
cg00463859	6920	TCEA3	chr1	23750101	23750102	CGI-N-Shore	FALSE	TRUE	FALSE	0.434409	-0.474082	0.573504	0.419645
cg00463957	5073	PARN	chr16	14583487	14583488	Non-CGI	FALSE	TRUE	FALSE	3.14668	1.80089	0.895664	0.771127
cg00464768	832	CAPZB	chr1	19722999	19723000	Non-CGI	FALSE	TRUE	FALSE	4.43279	3.19658	0.955409	0.8783
cg00464814	6310	ATXN1	chr6	16758889	16758890	CGI-N-Shore	FALSE	TRUE	FALSE	0.450807	-1.14656	0.57521	0.315756
cg00464946	NA	NA	chr1	120195038	120195039	CGI-S-Shelf	FALSE	FALSE	TRUE	1.41475	0.574625	0.718423	0.589336
cg00465247	10301	DLEU1	chr13	50703477	50703478	CGI	FALSE	TRUE	FALSE	2.14065	-0.136478	0.801618	0.477479
cg00465319	4638	MYLK	chr3	123339568	123339569	Non-CGI	TRUE	TRUE	FALSE	2.31037	1.55495	0.823349	0.736323
cg00465319	100506826	MYLK-AS1	chr3	123339568	123339569	Non-CGI	TRUE	TRUE	FALSE	2.31037	1.55495	0.823349	0.736323
cg00465970	NA	NA	chr3	129024601	129024602	CGI	FALSE	FALSE	TRUE	0.0224272	-1.15548	0.503961	0.316686
cg00466334	6913	TBX15	chr1	119532850	119532851	CGI	TRUE	FALSE	FALSE	2.99778	-1.02846	0.880575	0.345698
cg00466492	404217	CTXN1	chr19	7991731	7991732	CGI	TRUE	TRUE	FALSE	1.49833	0.386894	0.730775	0.56462
cg00466492	10469	TIMM44	chr19	7991731	7991732	CGI	TRUE	TRUE	FALSE	1.49833	0.386894	0.730775	0.56462
cg00468320	157753	TMEM74	chr8	109800379	109800380	CGI-S-Shore	TRUE	FALSE	FALSE	3.07669	2.46398	0.889494	0.841857
cg00468670	23150	FRMD4B	chr3	69371195	69371196	Non-CGI	TRUE	TRUE	FALSE	2.39494	0.548166	0.833162	0.586979
cg00469083	51741	WWOX	chr16	78601838	78601839	CGI	FALSE	TRUE	FALSE	3.93333	3.20443	0.936055	0.896324
cg00469602	NA	NA	chr2	172955930	172955931	CGI	FALSE	FALSE	TRUE	2.34986	0.718866	0.820422	0.617401
cg00469814	NA	NA	chr4	188953677	188953678	CGI	FALSE	FALSE	TRUE	2.24374	0.887906	0.822312	0.642539
cg00470007	NA	NA	chr12	132930066	132930067	CGI	FALSE	FALSE	TRUE	-0.000542487	-0.988664	0.500667	0.344147
cg00470636	1808	DPYSL2	chr8	26440349	26440350	CGI-S-Shelf	FALSE	TRUE	FALSE	2.46649	-0.105672	0.835962	0.478827
cg00470817	57121	LPAR5	chr12	6741882	6741883	Non-CGI	TRUE	TRUE	FALSE	4.06542	2.86553	0.942792	0.87217
cg00471190	9235	IL32	chr16	3115809	3115810	Non-CGI	TRUE	TRUE	FALSE	2.02995	1.04912	0.800052	0.669784
cg00471368	5336	PLCG2	chr16	81817629	81817630	CGI-S-Shelf	TRUE	TRUE	FALSE	2.54124	1.4349	0.842357	0.720989
cg00471696	51776	ZAK	chr2	173955214	173955215	Non-CGI	FALSE	TRUE	FALSE	1.22333	-1.16704	0.69526	0.323218
cg00471989	26000	TBC1D10B	chr16	30380183	30380184	CGI-N-Shore	FALSE	TRUE	FALSE	-1.94224	-2.56016	0.214169	0.153255
cg00472373	100526693	ARPC4-TTLL3	chr3	9833414	9833415	CGI-N-Shore	TRUE	TRUE	FALSE	1.07548	0.206216	0.672726	0.530376
cg00472373	10093	ARPC4	chr3	9833414	9833415	CGI-N-Shore	TRUE	TRUE	FALSE	1.07548	0.206216	0.672726	0.530376
cg00472373	10474	TADA3	chr3	9833414	9833415	CGI-N-Shore	TRUE	TRUE	FALSE	1.07548	0.206216	0.672726	0.530376
cg00472758	57465	TBC1D24	chr16	2552820	2552821	CGI-S-Shelf	FALSE	TRUE	FALSE	2.52825	0.98055	0.845232	0.648739
cg00473597	5990	RFX2	chr19	6108131	6108132	CGI-N-Shore	FALSE	TRUE	FALSE	1.06248	-0.803731	0.670542	0.368424
cg00473633	NA	NA	chr17	75260903	75260904	Non-CGI	FALSE	FALSE	TRUE	1.05502	-0.2067	0.666729	0.471475
cg00473639	84623	KIRREL3	chr11	126861050	126861051	Non-CGI	FALSE	TRUE	FALSE	1.0643	-0.26385	0.671495	0.458725
cg00474017	NA	NA	chr13	114074435	114074436	CGI-N-Shore	FALSE	FALSE	TRUE	4.93333	4.32112	0.967982	0.948382
cg00474218	NA	NA	chr15	67143904	67143905	CGI-N-Shore	FALSE	FALSE	TRUE	1.53986	-0.531311	0.738467	0.41181
cg00474798	8802	SUCLG1	chr2	84684489	84684490	CGI-N-Shore	FALSE	TRUE	FALSE	0.888757	0.1066	0.646409	0.518183
cg00474943	57521	RPTOR	chr17	78877076	78877077	CGI	FALSE	TRUE	FALSE	3.27791	2.44208	0.90199	0.834669
cg00476243	NA	NA	chr7	150023	150024	CGI	TRUE	FALSE	FALSE	0.38379	-0.549536	0.565293	0.41316
cg00476608	1822	ATN1	chr12	7044787	7044788	CGI-N-Shore	FALSE	TRUE	FALSE	1.81777	0.00664415	0.763659	0.509261
cg00476872	NA	NA	chr6	34201689	34201690	CGI-N-Shore	FALSE	FALSE	TRUE	3.54421	1.51426	0.918733	0.718006
cg00477086	8291	DYSF	chr2	71785920	71785921	CGI-N-Shore	FALSE	TRUE	FALSE	2.38154	1.58189	0.83503	0.743483
cg00478710	NA	NA	chr3	133392965	133392966	CGI	FALSE	FALSE	TRUE	1.94564	1.09807	0.786546	0.67777
cg00480033	NA	NA	chr6	13870551	13870552	CGI-N-Shore	FALSE	FALSE	TRUE	-0.890278	-1.69924	0.355704	0.236676
cg00480115	5349	FXYD3	chr19	35606877	35606878	Non-CGI	FALSE	TRUE	FALSE	3.27302	2.3198	0.903103	0.825031
cg00480142	100132594	PGAM1P5	chr12	96046743	96046744	Non-CGI	FALSE	FALSE	TRUE	2.13572	1.27637	0.811497	0.706739
cg00480161	92304	SCGB3A1	chr5	180017227	180017228	CGI	FALSE	TRUE	FALSE	-1.94275	-2.8926	0.214642	0.1227
cg00480856	8976	WASL	chr7	123390035	123390036	CGI-S-Shore	TRUE	FALSE	FALSE	3.67327	2.74979	0.922863	0.857501
cg00481159	144193	AMDHD1	chr12	96353086	96353087	CGI-S-Shelf	FALSE	TRUE	FALSE	1.69467	0.667479	0.756794	0.608617
cg00483217	22979	EFR3B	chr2	25321917	25321918	Non-CGI	FALSE	TRUE	FALSE	0.954471	-0.0232982	0.654895	0.498094
cg00483640	154386	C6orf195	chr6	2623483	2623484	Non-CGI	FALSE	TRUE	FALSE	4.05141	1.18259	0.941094	0.66314
cg00484488	100287559	ADPGK-AS1	chr15	73076983	73076984	CGI-S-Shore	TRUE	FALSE	FALSE	0.610286	-0.508507	0.601797	0.415829
cg00484488	83440	ADPGK	chr15	73076983	73076984	CGI-S-Shore	TRUE	FALSE	FALSE	0.610286	-0.508507	0.601797	0.415829
cg00486011	NA	NA	chr4	183851557	183851558	Non-CGI	FALSE	FALSE	TRUE	3.8805	3.09607	0.935485	0.892481
cg00486113	170680	PSORS1C2	chr6	31105711	31105712	Non-CGI	FALSE	TRUE	FALSE	-0.848708	-1.81883	0.359723	0.222133
cg00486113	170679	PSORS1C1	chr6	31105711	31105712	Non-CGI	FALSE	TRUE	FALSE	-0.848708	-1.81883	0.359723	0.222133
cg00486998	2122	MECOM	chr3	169072705	169072706	Non-CGI	FALSE	TRUE	FALSE	3.64065	2.87943	0.924735	0.872592
cg00487187	3087	HHEX	chr10	94451625	94451626	CGI	FALSE	TRUE	FALSE	1.45088	0.672452	0.7252	0.611235
cg00488501	114879	OSBPL5	chr11	3187032	3187033	CGI-S-Shore	TRUE	TRUE	FALSE	-1.13561	-2.15681	0.317336	0.185387
cg00488692	NA	NA	chr2	174877566	174877567	CGI	FALSE	FALSE	TRUE	-1.79344	-2.75309	0.22524	0.13038
cg00488747	29123	ANKRD11	chr16	89445503	89445504	CGI-S-Shelf	FALSE	TRUE	FALSE	3.73549	1.83437	0.928485	0.759862
cg00489394	117245	HRASLS5	chr11	63259326	63259327	CGI-S-Shore	TRUE	FALSE	FALSE	1.89013	0.756062	0.784184	0.619704
cg00489485	58189	WFDC1	chr16	84341364	84341365	Non-CGI	FALSE	TRUE	FALSE	2.89785	2.07925	0.87946	0.802283
cg00489539	10320	IKZF1	chr7	50466520	50466521	CGI-N-Shore	FALSE	TRUE	FALSE	2.78249	1.83629	0.86674	0.759812
cg00489652	83758	RBP5	chr12	7281783	7281784	CGI-N-Shore	TRUE	FALSE	FALSE	1.36433	0.158496	0.71461	0.52621
cg00489652	9746	CLSTN3	chr12	7281783	7281784	CGI-N-Shore	TRUE	FALSE	FALSE	1.36433	0.158496	0.71461	0.52621
cg00490203	283234	CCDC88B	chr11	64115989	64115990	Non-CGI	TRUE	TRUE	FALSE	0.821806	-0.0840274	0.636988	0.487574
cg00490976	NA	NA	chr3	194034055	194034056	CGI	FALSE	FALSE	TRUE	1.64635	0.10985	0.752357	0.521144
cg00491021	5327	PLAT	chr8	42064880	42064881	Non-CGI	FALSE	TRUE	FALSE	-1.12897	-2.09336	0.321491	0.192304
cg00491412	3800	KIF5C	chr2	149859732	149859733	CGI	FALSE	TRUE	FALSE	3.44415	2.56663	0.911889	0.847625
cg00491530	283335	LOC283335	chr12	53437765	53437766	CGI-N-Shelf	FALSE	TRUE	FALSE	4.12694	2.82398	0.941762	0.855311
cg00491548	126321	MFSD12	chr19	3539158	3539159	CGI-S-Shelf	TRUE	TRUE	FALSE	-0.316528	-0.948573	0.446768	0.345747
cg00491548	100128569	C19orf71	chr19	3539158	3539159	CGI-S-Shelf	TRUE	TRUE	FALSE	-0.316528	-0.948573	0.446768	0.345747
cg00492574	9314	KLF4	chr9	110248385	110248386	CGI-N-Shore	FALSE	TRUE	FALSE	3.25705	0.624225	0.903497	0.590891
cg00492741	863	CBFA2T3	chr16	89019632	89019633	CGI	FALSE	TRUE	FALSE	1.71813	0.896522	0.76059	0.640807
cg00492979	9644	SH3PXD2A	chr10	105428385	105428386	CGI-N-Shore	TRUE	TRUE	FALSE	-0.163865	-2.10122	0.47298	0.194126
cg00493363	NA	NA	chr7	106619774	106619775	Non-CGI	FALSE	FALSE	TRUE	2.19944	1.21554	0.815691	0.688296
cg00493554	8785	MATN4	chr20	43926595	43926596	CGI-N-Shore	FALSE	TRUE	FALSE	3.81916	3.17361	0.932656	0.890886
cg00494183	NA	NA	chr13	21645350	21645351	Non-CGI	FALSE	FALSE	TRUE	3.53009	2.65012	0.918832	0.855792
cg00494287	222256	CDHR3	chr7	105518489	105518490	CGI-S-Shore	TRUE	TRUE	FALSE	4.20346	3.37837	0.948055	0.903895
cg00494287	222255	ATXN7L1	chr7	105518489	105518490	CGI-S-Shore	TRUE	TRUE	FALSE	4.20346	3.37837	0.948055	0.903895
cg00494544	5504	PPP1R2	chr3	195268648	195268649	CGI-N-Shore	FALSE	TRUE	FALSE	0.916227	-0.562081	0.649966	0.417469
cg00494919	85442	KNDC1	chr10	135020822	135020823	CGI	FALSE	TRUE	FALSE	3.13419	2.37145	0.894018	0.829544
cg00495476	NA	NA	chr6	168061660	168061661	CGI-N-Shore	FALSE	FALSE	TRUE	2.01151	1.20115	0.792894	0.686899
cg00495860	NA	NA	chr21	38065524	38065525	CGI	FALSE	FALSE	TRUE	-1.08501	-2.3391	0.328565	0.167849
cg00496462	NA	NA	chr7	93577610	93577611	Non-CGI	FALSE	FALSE	TRUE	-0.91331	-2.09297	0.361398	0.201324
cg00497232	NA	NA	chr4	6665905	6665906	CGI	FALSE	FALSE	TRUE	-2.47287	-3.58574	0.174385	0.0788228
cg00498010	221937	FOXK1	chr7	4805943	4805944	CGI-S-Shore	FALSE	TRUE	FALSE	1.37328	0.630502	0.708219	0.606759
cg00498024	374907	B3GNT8	chr19	41934170	41934171	CGI-S-Shore	TRUE	TRUE	FALSE	-0.894314	-1.58093	0.351407	0.251378
cg00498211	6509	SLC1A4	chr2	65217568	65217569	CGI	FALSE	TRUE	FALSE	-0.252101	-1.62071	0.459574	0.260248
cg00498401	2125	EVPL	chr17	74024829	74024830	Non-CGI	TRUE	FALSE	FALSE	2.18265	1.29077	0.813945	0.700942
cg00498591	NA	NA	chr3	9904557	9904558	CGI	FALSE	FALSE	TRUE	-2.40853	-3.36887	0.171394	0.0900137
cg00498772	92017	SNX29	chr16	12184067	12184068	CGI	FALSE	TRUE	FALSE	1.80562	0.415382	0.766134	0.564557
cg00498804	6764	ST5	chr11	8827626	8827627	Non-CGI	FALSE	TRUE	FALSE	2.33986	1.17762	0.829744	0.676895
cg00499237	93082	NEURL3	chr2	97169033	97169034	CGI-S-Shelf	FALSE	TRUE	FALSE	3.23599	2.17207	0.900005	0.802866
cg00499837	5818	PVRL1	chr11	119542542	119542543	Non-CGI	FALSE	TRUE	FALSE	-0.402567	-1.02677	0.432141	0.330154
cg00500027	9381	OTOF	chr2	26701355	26701356	Non-CGI	TRUE	TRUE	FALSE	1.01921	-0.0451699	0.665114	0.492739
cg00500070	23549	DNPEP	chr2	220250440	220250441	CGI-N-Shore	FALSE	TRUE	FALSE	2.87168	1.92307	0.872519	0.779657
cg00500213	8216	LZTR1	chr22	21337671	21337672	CGI-S-Shore	FALSE	TRUE	FALSE	2.47349	1.77312	0.844652	0.75984
cg00501356	79640	C22orf46	chr22	42093980	42093981	CGI-N-Shore	TRUE	TRUE	FALSE	1.99515	1.29797	0.792035	0.709427
cg00501356	150365	MEI1	chr22	42093980	42093981	CGI-N-Shore	TRUE	TRUE	FALSE	1.99515	1.29797	0.792035	0.709427
cg00502062	NA	NA	chr1	201578212	201578213	Non-CGI	FALSE	FALSE	TRUE	1.3881	-0.229821	0.719887	0.462636
cg00502254	943	TNFRSF8	chr1	12201600	12201601	Non-CGI	FALSE	TRUE	FALSE	3.97753	3.2591	0.937087	0.897083
cg00502509	8379	MAD1L1	chr7	1956121	1956122	CGI	FALSE	TRUE	FALSE	4.50329	3.64002	0.95675	0.917836
cg00502575	22821	RASA3	chr13	114800841	114800842	CGI-S-Shore	FALSE	TRUE	FALSE	4.07335	2.68739	0.943339	0.85303
cg00502746	81532	MOB2	chr11	1715993	1715994	CGI	FALSE	TRUE	FALSE	4.27243	3.33431	0.95025	0.903372
cg00502926	57447	NDRG2	chr14	21510056	21510057	Non-CGI	TRUE	TRUE	FALSE	0.815785	-0.329894	0.633898	0.444253
cg00502926	84659	RNASE7	chr14	21510056	21510057	Non-CGI	TRUE	TRUE	FALSE	0.815785	-0.329894	0.633898	0.444253
cg00503017	3778	KCNMA1	chr10	79151564	79151565	Non-CGI	FALSE	TRUE	FALSE	-0.83066	-1.78409	0.365961	0.226601
cg00504782	NA	NA	chr1	111037272	111037273	Non-CGI	FALSE	FALSE	TRUE	2.01737	1.39116	0.790584	0.719472
cg00505001	26960	NBEA	chr13	36049807	36049808	CGI	TRUE	TRUE	FALSE	-0.52407	-1.59439	0.413652	0.272078
cg00505001	100302239	MIR548F5	chr13	36049807	36049808	CGI	TRUE	TRUE	FALSE	-0.52407	-1.59439	0.413652	0.272078
cg00505073	128497	SPATA25	chr20	44516626	44516627	CGI-N-Shelf	TRUE	FALSE	FALSE	3.26203	2.384	0.899262	0.82656
cg00505133	126969	SLC44A3	chr1	95320459	95320460	Non-CGI	FALSE	TRUE	FALSE	-2.76631	-3.3923	0.141076	0.0875229
cg00505606	7161	TP73	chr1	3620638	3620639	CGI-N-Shore	FALSE	TRUE	FALSE	2.2104	1.41463	0.819468	0.723021
cg00506297	NA	NA	chr1	209919394	209919395	CGI-N-Shore	FALSE	FALSE	TRUE	3.51055	2.67664	0.918247	0.863467
cg00506299	23180	RFTN1	chr3	16469127	16469128	CGI-S-Shore	FALSE	TRUE	FALSE	0.1025	-1.3048	0.51742	0.294272
cg00506343	3222	HOXC5	chr12	54421033	54421034	CGI-N-Shore	TRUE	TRUE	FALSE	0.931752	-0.376584	0.6537	0.438053
cg00506343	3221	HOXC4	chr12	54421033	54421034	CGI-N-Shore	TRUE	TRUE	FALSE	0.931752	-0.376584	0.6537	0.438053
cg00506343	3223	HOXC6	chr12	54421033	54421034	CGI-N-Shore	TRUE	TRUE	FALSE	0.931752	-0.376584	0.6537	0.438053
cg00506540	79441	HAUS3	chr4	2245140	2245141	CGI-S-Shore	TRUE	FALSE	FALSE	3.20791	2.59176	0.898978	0.843331
cg00506540	353497	POLN	chr4	2245140	2245141	CGI-S-Shore	TRUE	FALSE	FALSE	3.20791	2.59176	0.898978	0.843331
cg00507154	199800	ADM5	chr19	50192739	50192740	CGI	TRUE	FALSE	FALSE	-0.106041	-0.925641	0.481904	0.349604
cg00507154	126129	CPT1C	chr19	50192739	50192740	CGI	TRUE	FALSE	FALSE	-0.106041	-0.925641	0.481904	0.349604
cg00507497	56853	CELF4	chr18	34838423	34838424	CGI-S-Shelf	FALSE	TRUE	FALSE	0.629532	-0.129188	0.604658	0.48103
cg00507679	84630	TTBK1	chr6	43251876	43251877	CGI	TRUE	TRUE	FALSE	2.3258	1.60095	0.830642	0.751307
cg00508982	27244	SESN1	chr6	109345671	109345672	Non-CGI	FALSE	TRUE	FALSE	3.72945	3.09887	0.928804	0.890964
cg00509187	55068	ENOX1	chr13	44362093	44362094	CGI-S-Shore	TRUE	FALSE	FALSE	2.41528	1.35655	0.827955	0.716731
cg00510149	10335	MRVI1	chr11	10674966	10674967	Non-CGI	TRUE	TRUE	FALSE	4.17073	2.94435	0.946685	0.871343
cg00510330	NA	NA	chr6	39916111	39916112	Non-CGI	FALSE	FALSE	TRUE	1.85107	0.713299	0.779194	0.616725
cg00510541	NA	NA	chr6	44040208	44040209	CGI-N-Shore	FALSE	TRUE	FALSE	2.53362	1.7382	0.837127	0.766212
cg00510870	NA	NA	chr8	29210800	29210801	CGI	FALSE	FALSE	TRUE	1.36936	-0.0542143	0.713331	0.490274
cg00511334	123904	NRN1L	chr16	67918840	67918841	Non-CGI	TRUE	FALSE	FALSE	0.228455	-1.72812	0.53893	0.242108
cg00511577	NA	NA	chr7	131751077	131751078	Non-CGI	FALSE	FALSE	TRUE	3.55283	2.30587	0.914305	0.819274
cg00512404	397	ARHGDIB	chr12	15114732	15114733	Non-CGI	TRUE	FALSE	FALSE	3.9836	2.84488	0.939228	0.851773
cg00512872	9265	CYTH3	chr7	6268584	6268585	Non-CGI	FALSE	TRUE	FALSE	2.6136	0.12741	0.851235	0.51032
cg00513288	NA	NA	chr19	2358394	2358395	CGI-N-Shore	FALSE	FALSE	TRUE	-0.0737719	-0.868586	0.487231	0.369339
cg00513316	1381	CRABP1	chr15	78632109	78632110	CGI-N-Shore	TRUE	FALSE	FALSE	3.004	1.98976	0.884511	0.782542
cg00513952	NA	NA	chr16	57351118	57351119	Non-CGI	FALSE	FALSE	TRUE	1.36609	-0.957199	0.707094	0.350767
cg00514307	1302	COL11A2	chr6	33137260	33137261	Non-CGI	FALSE	TRUE	FALSE	4.23402	3.59786	0.948733	0.915819
cg00514486	389118	CDHR4	chr3	49837348	49837349	CGI-N-Shelf	TRUE	FALSE	FALSE	-1.05372	-1.82278	0.334187	0.223864
cg00515756	747	DAGLA	chr11	61464876	61464877	Non-CGI	FALSE	TRUE	FALSE	4.11657	3.36859	0.944455	0.902752
cg00516030	1490	CTGF	chr6	132273126	132273127	CGI-S-Shore	TRUE	FALSE	FALSE	-0.202848	-1.44173	0.465817	0.271232
cg00516678	358	AQP1	chr7	30950813	30950814	CGI-N-Shore	TRUE	TRUE	FALSE	2.46545	1.39144	0.835894	0.714301
cg00516867	611	OPN1SW	chr7	128417291	128417292	Non-CGI	TRUE	FALSE	FALSE	2.16268	1.35134	0.80892	0.707729
cg00517202	5592	PRKG1	chr10	53333572	53333573	Non-CGI	FALSE	TRUE	FALSE	2.56836	1.87375	0.853285	0.783169
cg00517261	6539	SLC6A12	chr12	323801	323802	Non-CGI	TRUE	FALSE	FALSE	-0.530399	-1.61607	0.414728	0.260629
cg00517787	NA	NA	chr4	154713235	154713236	CGI-S-Shore	FALSE	FALSE	TRUE	0.813818	0.0842043	0.635567	0.514448
cg00518857	NA	NA	chr13	112292532	112292533	Non-CGI	FALSE	FALSE	TRUE	0.309355	-0.737997	0.551577	0.385539
cg00518941	5581	PRKCE	chr2	46361964	46361965	Non-CGI	FALSE	TRUE	FALSE	1.87028	0.811778	0.770921	0.620002
cg00519063	2730	GCLM	chr1	94373434	94373435	CGI-N-Shore	FALSE	TRUE	FALSE	0.402615	-1.39417	0.564976	0.2822
cg00519299	11251	PTGDR2	chr11	60623639	60623640	CGI-S-Shelf	TRUE	FALSE	FALSE	2.06443	1.20954	0.794805	0.683085
cg00520135	7168	TPM1	chr15	63333846	63333847	CGI-N-Shore	TRUE	FALSE	FALSE	3.31917	2.30319	0.904288	0.802548
cg00520380	3985	LIMK2	chr22	31643997	31643998	Non-CGI	TRUE	TRUE	FALSE	0.532154	-0.896769	0.589489	0.35073
cg00520612	6152	RPL24	chr3	101406543	101406544	CGI-S-Shore	TRUE	FALSE	FALSE	3.02676	1.76866	0.884607	0.755437
cg00521255	1839	HBEGF	chr5	139726689	139726690	CGI-S-Shore	TRUE	FALSE	FALSE	-0.817166	-1.8899	0.366666	0.215982
cg00521428	128272	ARHGEF19	chr1	16534579	16534580	CGI-S-Shore	TRUE	TRUE	FALSE	1.59447	0.0958765	0.739799	0.511595
cg00521993	5532	PPP3CB	chr10	75199411	75199412	Non-CGI	FALSE	TRUE	FALSE	1.82106	0.519787	0.770493	0.58783
cg00523012	9592	IER2	chr19	13264324	13264325	CGI	TRUE	TRUE	FALSE	-0.328991	-3.02555	0.454895	0.120136
cg00524271	5334	PLCL1	chr2	198668185	198668186	CGI-N-Shore	TRUE	FALSE	FALSE	3.56915	2.8942	0.921116	0.878422
cg00524899	344148	NCKAP5	chr2	133635152	133635153	Non-CGI	FALSE	TRUE	FALSE	2.72601	1.94352	0.8658	0.790062
cg00525288	105	ADARB2	chr10	1236072	1236073	CGI	TRUE	TRUE	FALSE	2.50733	1.28514	0.840529	0.690134
cg00525683	8728	ADAM19	chr5	156948581	156948582	Non-CGI	FALSE	TRUE	FALSE	1.87591	-0.072851	0.774957	0.495842
cg00526772	255082	CASC2	chr10	119830037	119830038	Non-CGI	FALSE	TRUE	FALSE	1.92771	0.980388	0.789172	0.652787
cg00526835	100188947	LOC100188947	chr10	93335140	93335141	Non-CGI	FALSE	TRUE	FALSE	2.98974	1.81245	0.883925	0.766687
cg00527653	8879	SGPL1	chr10	72574724	72574725	CGI-N-Shore	TRUE	FALSE	FALSE	3.56564	2.35978	0.916556	0.82423
cg00529236	NA	NA	chr16	85239958	85239959	CGI-N-Shore	FALSE	FALSE	TRUE	0.580196	-0.877286	0.595907	0.358056
cg00529909	23030	KDM4B	chr19	5108734	5108735	CGI-N-Shore	FALSE	TRUE	FALSE	2.51257	1.36502	0.844739	0.706895
cg00530568	57113	TRPC7	chr5	135587383	135587384	CGI	FALSE	TRUE	FALSE	4.5288	1.69425	0.956216	0.736308
cg00531453	730130	TMEM229A	chr7	123673926	123673927	CGI-S-Shore	TRUE	TRUE	FALSE	0.44509	-0.539706	0.574169	0.411577
cg00531949	NA	NA	chr2	167429129	167429130	Non-CGI	FALSE	FALSE	TRUE	3.16655	2.22074	0.89596	0.80912
cg00532335	9211	LGI1	chr10	95516861	95516862	Non-CGI	TRUE	FALSE	FALSE	2.53705	0.602009	0.839813	0.593448
cg00532502	149134	LOC149134	chr1	246953273	246953274	CGI-S-Shore	FALSE	TRUE	FALSE	2.71428	1.97273	0.866279	0.792833
cg00532802	NA	NA	chr11	121594220	121594221	CGI	FALSE	FALSE	TRUE	-1.97954	-2.71162	0.210269	0.133754
cg00532936	6512	SLC1A7	chr1	53588449	53588450	Non-CGI	FALSE	TRUE	FALSE	0.532587	-1.61838	0.585093	0.263616
cg00534380	11138	TBC1D8	chr2	101766586	101766587	CGI-N-Shore	TRUE	TRUE	FALSE	3.58502	2.56615	0.921886	0.834445
cg00534684	5724	PTAFR	chr1	28504648	28504649	Non-CGI	TRUE	TRUE	FALSE	3.82565	2.65648	0.931944	0.838943
cg00535027	8532	CPZ	chr4	8593933	8593934	CGI-N-Shore	TRUE	TRUE	FALSE	2.12822	1.06579	0.80595	0.672692
cg00536472	10194	TSHZ1	chr18	73000758	73000759	CGI-S-Shore	FALSE	TRUE	FALSE	2.00426	1.34338	0.788937	0.711944
cg00536718	NA	NA	chr7	2478297	2478298	CGI-S-Shore	FALSE	TRUE	FALSE	1.52063	-0.699387	0.732912	0.386653
cg00537351	7204	TRIO	chr5	14339109	14339110	Non-CGI	FALSE	TRUE	FALSE	3.87288	2.87857	0.93172	0.871976
cg00538017	51557	LGSN	chr6	64029870	64029871	Non-CGI	TRUE	FALSE	FALSE	1.55819	0.320173	0.736074	0.549824
cg00538147	NA	NA	chr10	125751609	125751610	CGI	FALSE	FALSE	TRUE	-0.8387	-2.07374	0.377078	0.204338
cg00539261	84958	SYTL1	chr1	27678138	27678139	CGI-S-Shore	FALSE	TRUE	FALSE	1.63719	0.396282	0.747797	0.567016
cg00539360	7422	VEGFA	chr6	43737136	43737137	CGI-N-Shore	TRUE	FALSE	FALSE	-0.890032	-2.67396	0.354579	0.137242
cg00539386	80332	ADAM33	chr20	3662512	3662513	CGI	FALSE	TRUE	FALSE	-2.81414	-3.75087	0.136592	0.0697124
cg00539581	NA	NA	chr5	66477808	66477809	Non-CGI	FALSE	FALSE	TRUE	0.144628	-0.84043	0.525644	0.363989
cg00540067	28999	KLF15	chr3	126074344	126074345	CGI-N-Shore	FALSE	TRUE	FALSE	2.5604	1.94563	0.852662	0.789881
cg00540434	NA	NA	chr20	61897264	61897265	CGI-N-Shore	FALSE	FALSE	TRUE	3.62156	2.90812	0.923624	0.871173
cg00540540	57451	TENM2	chr5	167219531	167219532	Non-CGI	FALSE	TRUE	FALSE	4.19616	3.00586	0.947886	0.875993
cg00540587	9759	HDAC4	chr2	240184656	240184657	CGI	FALSE	TRUE	FALSE	3.70774	3.07289	0.928433	0.886117
cg00541089	80305	TRABD	chr22	50637801	50637802	CGI-S-Shore	TRUE	TRUE	FALSE	3.84698	2.73851	0.931361	0.863868
cg00541089	83642	SELO	chr22	50637801	50637802	CGI-S-Shore	TRUE	TRUE	FALSE	3.84698	2.73851	0.931361	0.863868
cg00541544	25777	SUN2	chr22	39150255	39150256	CGI-N-Shore	FALSE	TRUE	FALSE	0.405793	-0.690689	0.563003	0.383795
cg00542880	84909	C9orf3	chr9	97765043	97765044	CGI-N-Shore	TRUE	TRUE	FALSE	4.04161	3.24649	0.941754	0.892772
cg00543073	53335	BCL11A	chr2	60773386	60773387	CGI-N-Shelf	TRUE	TRUE	FALSE	1.43985	0.671871	0.719445	0.61237
cg00543364	388815	LINC00478	chr21	17961829	17961830	Non-CGI	TRUE	TRUE	FALSE	3.99479	2.56389	0.940404	0.83331
cg00543364	406912	MIR125B2	chr21	17961829	17961830	Non-CGI	TRUE	TRUE	FALSE	3.99479	2.56389	0.940404	0.83331
cg00544032	NA	NA	chr1	118239410	118239411	Non-CGI	FALSE	FALSE	TRUE	-0.132801	-1.71522	0.480584	0.251387
cg00544436	3159	HMGA1	chr6	34203564	34203565	CGI-S-Shore	TRUE	FALSE	FALSE	0.61402	-1.25454	0.599733	0.322685
cg00545196	6256	RXRA	chr9	137299685	137299686	CGI-S-Shore	FALSE	TRUE	FALSE	3.21188	2.55941	0.900672	0.84658
cg00545232	10082	GPC6	chr13	93923232	93923233	Non-CGI	FALSE	TRUE	FALSE	2.87214	2.21767	0.868439	0.819271
cg00545705	5362	PLXNA2	chr1	208382186	208382187	Non-CGI	FALSE	TRUE	FALSE	4.07386	2.7176	0.941095	0.855813
cg00546491	5137	PDE1C	chr7	32111062	32111063	CGI-S-Shore	TRUE	TRUE	FALSE	-1.38527	-2.02429	0.284175	0.198492
cg00546666	63925	ZNF335	chr20	44598621	44598622	CGI-N-Shore	TRUE	TRUE	FALSE	-1.82297	-2.55777	0.223861	0.146659
cg00547143	51083	GAL	chr11	68450618	68450619	CGI-N-Shore	TRUE	FALSE	FALSE	2.13048	0.933699	0.808138	0.647612
cg00547304	90586	AOC4P	chr17	41017800	41017801	Non-CGI	TRUE	FALSE	FALSE	1.02531	0.24762	0.669186	0.542247
cg00547983	NA	NA	chr1	30715185	30715186	Non-CGI	FALSE	FALSE	TRUE	-0.803223	-1.47615	0.369091	0.274875
cg00548098	NA	NA	chr16	11295667	11295668	Non-CGI	FALSE	FALSE	TRUE	-1.33379	-2.52403	0.300986	0.162237
cg00548633	80207	OPA3	chr19	46094335	46094336	CGI	TRUE	TRUE	FALSE	0.432377	-0.977913	0.571376	0.350425
cg00548633	2828	GPR4	chr19	46094335	46094336	CGI	TRUE	TRUE	FALSE	0.432377	-0.977913	0.571376	0.350425
cg00548824	51112	TRAPPC12	chr2	3452407	3452408	CGI	FALSE	TRUE	FALSE	3.93107	2.31245	0.926128	0.771329
cg00549398	57521	RPTOR	chr17	78725201	78725202	CGI	FALSE	TRUE	FALSE	2.68195	1.89934	0.86127	0.764923
cg00549412	54020	SLC37A1	chr21	43933482	43933483	CGI	TRUE	TRUE	FALSE	2.60863	1.2667	0.85313	0.704544
cg00549574	5635	PRPSAP1	chr17	74350942	74350943	CGI-S-Shore	TRUE	FALSE	FALSE	1.311	0.552546	0.702918	0.591773
cg00549601	NA	NA	chr12	52208872	52208873	CGI-S-Shore	FALSE	FALSE	TRUE	2.27518	1.30645	0.815046	0.690149
cg00550797	9289	GPR56	chr16	57653904	57653905	Non-CGI	TRUE	TRUE	FALSE	3.02619	2.39684	0.886013	0.833535
cg00550928	4248	MGAT3	chr22	39883190	39883191	CGI-N-Shore	TRUE	TRUE	FALSE	1.89455	0.767878	0.784802	0.621829
cg00551143	9865	TRIL	chr7	28998860	28998861	CGI-S-Shore	TRUE	FALSE	FALSE	4.51552	1.8267	0.957233	0.755569
cg00552318	150356	CHADL	chr22	41633632	41633633	CGI	FALSE	TRUE	FALSE	0.69993	0.0265596	0.616435	0.504934
cg00552868	140893	RBBP8NL	chr20	60990649	60990650	CGI-N-Shore	FALSE	TRUE	FALSE	2.80754	1.85367	0.872277	0.780226
cg00554993	1053	CEBPE	chr14	23588616	23588617	CGI-S-Shore	TRUE	FALSE	FALSE	2.9565	2.27579	0.882148	0.813804
cg00555085	NA	NA	chr16	87616248	87616249	CGI	FALSE	FALSE	TRUE	-1.38126	-2.19232	0.279712	0.180472
cg00555339	285768	LOC285768	chr6	1102438	1102439	Non-CGI	TRUE	TRUE	FALSE	3.82747	3.06749	0.931326	0.890322
cg00555420	202018	TAPT1	chr4	16214868	16214869	Non-CGI	FALSE	TRUE	FALSE	3.2029	2.5001	0.898796	0.841669
cg00555438	NA	NA	chr3	195578280	195578281	CGI-S-Shore	FALSE	FALSE	TRUE	-0.419209	-1.44648	0.428885	0.278879
cg00556126	58189	WFDC1	chr16	84328338	84328339	CGI	TRUE	FALSE	FALSE	-2.39297	-3.18629	0.162817	0.100097
cg00560277	2737	GLI3	chr7	42267269	42267270	CGI-N-Shore	FALSE	TRUE	FALSE	2.69567	1.194	0.858175	0.687386
cg00560542	79933	SYNPO2L	chr10	75407634	75407635	CGI	FALSE	TRUE	FALSE	-0.767642	-1.64921	0.373376	0.245846
cg00560632	NA	NA	chr1	19147074	19147075	CGI	FALSE	FALSE	TRUE	1.61865	0.927242	0.743376	0.651077
cg00561194	57209	ZNF248	chr10	38069720	38069721	CGI	FALSE	FALSE	TRUE	-0.0451125	-0.880155	0.493019	0.365223
cg00561854	NA	NA	chr2	30253548	30253549	Non-CGI	FALSE	FALSE	TRUE	0.144145	-1.05233	0.524405	0.330579
cg00562312	9509	ADAMTS2	chr5	178752999	178753000	CGI-N-Shore	FALSE	TRUE	FALSE	3.91382	2.56932	0.937133	0.832393
cg00563495	64220	STRA6	chr15	74489089	74489090	Non-CGI	TRUE	TRUE	FALSE	2.63917	1.77712	0.856425	0.758875
cg00563678	57484	RNF150	chr4	141968563	141968564	Non-CGI	FALSE	TRUE	FALSE	0.836153	0.0160447	0.631478	0.50202
cg00563858	55568	GALNT10	chr5	153735395	153735396	Non-CGI	FALSE	TRUE	FALSE	4.34592	1.84823	0.949308	0.758504
cg00563926	7049	TGFBR3	chr1	92352481	92352482	CGI-S-Shore	TRUE	TRUE	FALSE	2.0505	1.14092	0.803383	0.685968
cg00564163	79689	STEAP4	chr7	87935979	87935980	CGI-N-Shore	FALSE	TRUE	FALSE	0.12644	-0.783589	0.52022	0.371009
cg00565412	114614	MIR155HG	chr21	26933554	26933555	CGI-N-Shore	TRUE	FALSE	FALSE	4.23925	3.17964	0.94489	0.888413
cg00565679	NA	NA	chr12	115371893	115371894	Non-CGI	FALSE	FALSE	TRUE	2.4512	0.879398	0.828968	0.641644
cg00566209	NA	NA	chr2	716389	716390	Non-CGI	FALSE	FALSE	TRUE	0.127163	-0.546761	0.521662	0.416271
cg00566949	25948	KBTBD2	chr7	32927892	32927893	CGI-N-Shelf	FALSE	TRUE	FALSE	2.89674	1.46185	0.878566	0.718221
cg00566949	23080	AVL9	chr7	32927892	32927893	CGI-N-Shelf	FALSE	TRUE	FALSE	2.89674	1.46185	0.878566	0.718221
cg00566961	NA	NA	chr5	119488431	119488432	Non-CGI	FALSE	FALSE	TRUE	1.05184	-0.28076	0.66157	0.454389
cg00567542	NA	NA	chr6	53826994	53826995	Non-CGI	FALSE	TRUE	FALSE	3.13275	2.16479	0.894297	0.807157
cg00569091	473	RERE	chr1	8424793	8424794	Non-CGI	FALSE	TRUE	FALSE	3.45873	1.85356	0.915189	0.77559
cg00569276	11240	PADI2	chr1	17446545	17446546	CGI-S-Shore	TRUE	FALSE	FALSE	3.63381	2.21647	0.9227	0.798247
cg00569447	NA	NA	chr5	50695224	50695225	CGI-S-Shore	FALSE	FALSE	TRUE	0.548898	-1.65992	0.583047	0.258976
cg00569500	943	TNFRSF8	chr1	12181636	12181637	Non-CGI	FALSE	TRUE	FALSE	2.91772	1.9264	0.880229	0.78692
cg00569599	202052	DNAJC18	chr5	138746067	138746068	Non-CGI	FALSE	TRUE	FALSE	3.53238	2.10126	0.917839	0.798568
cg00569808	23174	ZCCHC14	chr16	87467986	87467987	CGI	FALSE	TRUE	FALSE	4.3647	2.89282	0.952786	0.852634
cg00570088	91304	TMEM259	chr19	1017316	1017317	CGI-S-Shelf	FALSE	TRUE	FALSE	3.98889	2.94699	0.939951	0.880499
cg00570269	84935	MEDAG	chr13	31480942	31480943	CGI	FALSE	TRUE	FALSE	0.815455	-1.1533	0.632936	0.324941
cg00570269	100507064	TEX26-AS1	chr13	31480942	31480943	CGI	FALSE	TRUE	FALSE	0.815455	-1.1533	0.632936	0.324941
cg00571819	100272217	LOC100272217	chr9	133455886	133455887	CGI-S-Shore	TRUE	TRUE	FALSE	-0.865462	-1.89362	0.362025	0.218238
cg00571819	8939	FUBP3	chr9	133455886	133455887	CGI-S-Shore	TRUE	TRUE	FALSE	-0.865462	-1.89362	0.362025	0.218238
cg00572586	201164	PLD6	chr17	17109740	17109741	CGI	TRUE	TRUE	FALSE	-1.01934	-1.81472	0.334824	0.223807
cg00573124	90120	C9orf69	chr9	139011777	139011778	CGI	TRUE	FALSE	FALSE	-1.09948	-1.91849	0.321541	0.214603
cg00573352	219771	CCNY	chr10	35754300	35754301	Non-CGI	FALSE	TRUE	FALSE	3.83237	3.18376	0.933754	0.89814
cg00573504	NA	NA	chr5	1123809	1123810	CGI-S-Shore	FALSE	FALSE	TRUE	3.34077	2.72156	0.907555	0.864169
cg00573584	NA	NA	chr1	165564752	165564753	CGI-N-Shelf	TRUE	FALSE	FALSE	-0.483063	-1.20154	0.420314	0.308001
cg00573835	NA	NA	chr16	51188762	51188763	CGI	FALSE	FALSE	TRUE	0.543174	-0.365014	0.582726	0.44291
cg00573857	NA	NA	chr5	981189	981190	CGI-S-Shore	FALSE	FALSE	TRUE	0.440108	-0.448126	0.573451	0.426054
cg00574196	401944	LDLRAD2	chr1	22137992	22137993	CGI-N-Shelf	TRUE	FALSE	FALSE	0.728033	-0.052086	0.618072	0.491966
cg00574379	445347	TARP	chr7	38344455	38344456	Non-CGI	TRUE	TRUE	FALSE	1.96362	1.12726	0.790965	0.678611
cg00574742	NA	NA	chr5	2223624	2223625	CGI-N-Shore	FALSE	FALSE	TRUE	0.235545	-0.943591	0.537059	0.350834
cg00576267	10158	PDZK1IP1	chr1	47649505	47649506	Non-CGI	FALSE	TRUE	FALSE	2.60853	1.94726	0.852197	0.78623
cg00576689	NA	NA	chr8	37218068	37218069	Non-CGI	FALSE	FALSE	TRUE	2.66854	0.526062	0.856708	0.586128
cg00576936	84465	MEGF11	chr15	66332091	66332092	CGI-N-Shore	TRUE	TRUE	FALSE	0.234246	-1.3323	0.538036	0.301871
cg00576936	100422905	MIR4311	chr15	66332091	66332092	CGI-N-Shore	TRUE	TRUE	FALSE	0.234246	-1.3323	0.538036	0.301871
cg00577202	9047	SH2D2A	chr1	156784152	156784153	CGI-S-Shore	TRUE	TRUE	FALSE	-0.0110553	-0.899932	0.498425	0.35299
cg00577202	4914	NTRK1	chr1	156784152	156784153	CGI-S-Shore	TRUE	TRUE	FALSE	-0.0110553	-0.899932	0.498425	0.35299
cg00578437	5594	MAPK1	chr22	22217249	22217250	CGI-N-Shelf	FALSE	TRUE	FALSE	4.84083	4.14256	0.965872	0.93735
cg00579694	NA	NA	chr6	1523080	1523081	CGI-N-Shore	FALSE	FALSE	TRUE	3.79757	2.92725	0.931743	0.876707
cg00581103	1186	CLCN7	chr16	1515536	1515537	CGI	FALSE	TRUE	FALSE	2.83229	1.85621	0.872218	0.770931
cg00581154	63976	PRDM16	chr1	3123695	3123696	CGI	FALSE	TRUE	FALSE	2.64271	1.22326	0.855039	0.697311
cg00582337	94086	HSPB9	chr17	40274811	40274812	CGI	TRUE	FALSE	FALSE	0.978608	0.106614	0.66203	0.518067
cg00582337	2648	KAT2A	chr17	40274811	40274812	CGI	TRUE	FALSE	FALSE	0.978608	0.106614	0.66203	0.518067
cg00582524	6299	SALL1	chr16	51184392	51184393	CGI	TRUE	TRUE	FALSE	-0.87325	-1.88132	0.359024	0.22612
cg00582562	8631	SKAP1	chr17	46388465	46388466	Non-CGI	FALSE	TRUE	FALSE	-1.00527	-2.15997	0.338782	0.194174
cg00582970	NA	NA	chr17	60947793	60947794	Non-CGI	FALSE	FALSE	TRUE	-0.94941	-1.88449	0.349849	0.221841
cg00583861	NA	NA	chr1	32014363	32014364	Non-CGI	FALSE	FALSE	TRUE	-1.48361	-2.47363	0.273874	0.155017
cg00584174	117245	HRASLS5	chr11	63257403	63257404	CGI-N-Shore	FALSE	TRUE	FALSE	2.19267	0.90517	0.813637	0.638196
cg00584450	2300	FOXL1	chr16	86612312	86612313	CGI	TRUE	FALSE	FALSE	4.32111	0.673844	0.951296	0.588309
cg00584594	NA	NA	chr16	84951560	84951561	Non-CGI	FALSE	FALSE	TRUE	4.04312	2.41749	0.941148	0.820179
cg00584686	54221	SNTG2	chr2	1161942	1161943	CGI-N-Shore	FALSE	TRUE	FALSE	3.64317	2.44968	0.924707	0.840402
cg00584815	9813	EFCAB14	chr1	47136924	47136925	CGI-S-Shelf	TRUE	TRUE	FALSE	3.15743	2.3944	0.89638	0.831725
cg00584815	374973	TEX38	chr1	47136924	47136925	CGI-S-Shelf	TRUE	TRUE	FALSE	3.15743	2.3944	0.89638	0.831725
cg00585219	11155	LDB3	chr10	88470569	88470570	CGI	FALSE	TRUE	FALSE	4.70527	3.67259	0.962261	0.913692
cg00586383	NA	NA	chr17	75528194	75528195	CGI-S-Shelf	FALSE	TRUE	FALSE	2.43498	1.51977	0.840761	0.733419
cg00586817	23314	SATB2	chr2	200329872	200329873	CGI-S-Shore	TRUE	TRUE	FALSE	3.11419	0.593968	0.888886	0.598302
cg00588297	165545	DQX1	chr2	74753691	74753692	CGI-N-Shelf	TRUE	FALSE	FALSE	3.24024	2.54024	0.898746	0.845489
cg00588393	10231	RCAN2	chr6	46326932	46326933	Non-CGI	FALSE	TRUE	FALSE	4.16429	3.33511	0.946742	0.905556
cg00588734	90134	KCNH7	chr2	163466403	163466404	Non-CGI	FALSE	TRUE	FALSE	2.08736	1.1524	0.800147	0.67566
cg00589541	64778	FNDC3B	chr3	171844005	171844006	Non-CGI	FALSE	TRUE	FALSE	-0.118975	-1.14242	0.479682	0.31262
cg00589850	56100	PCDHGB6	chr5	140857995	140857996	CGI	TRUE	TRUE	FALSE	-0.33344	-1.04162	0.446134	0.3321
cg00589850	56107	PCDHGA9	chr5	140857995	140857996	CGI	TRUE	TRUE	FALSE	-0.33344	-1.04162	0.446134	0.3321
cg00589850	56113	PCDHGA2	chr5	140857995	140857996	CGI	TRUE	TRUE	FALSE	-0.33344	-1.04162	0.446134	0.3321
cg00589850	56105	PCDHGA11	chr5	140857995	140857996	CGI	TRUE	TRUE	FALSE	-0.33344	-1.04162	0.446134	0.3321
cg00589850	26025	PCDHGA12	chr5	140857995	140857996	CGI	TRUE	TRUE	FALSE	-0.33344	-1.04162	0.446134	0.3321
cg00589850	56111	PCDHGA4	chr5	140857995	140857996	CGI	TRUE	TRUE	FALSE	-0.33344	-1.04162	0.446134	0.3321
cg00589850	56104	PCDHGB1	chr5	140857995	140857996	CGI	TRUE	TRUE	FALSE	-0.33344	-1.04162	0.446134	0.3321
cg00589850	56103	PCDHGB2	chr5	140857995	140857996	CGI	TRUE	TRUE	FALSE	-0.33344	-1.04162	0.446134	0.3321
cg00589850	9708	PCDHGA8	chr5	140857995	140857996	CGI	TRUE	TRUE	FALSE	-0.33344	-1.04162	0.446134	0.3321
cg00589850	56102	PCDHGB3	chr5	140857995	140857996	CGI	TRUE	TRUE	FALSE	-0.33344	-1.04162	0.446134	0.3321
cg00589850	56108	PCDHGA7	chr5	140857995	140857996	CGI	TRUE	TRUE	FALSE	-0.33344	-1.04162	0.446134	0.3321
cg00589850	56110	PCDHGA5	chr5	140857995	140857996	CGI	TRUE	TRUE	FALSE	-0.33344	-1.04162	0.446134	0.3321
cg00589850	56099	PCDHGB7	chr5	140857995	140857996	CGI	TRUE	TRUE	FALSE	-0.33344	-1.04162	0.446134	0.3321
cg00589850	56112	PCDHGA3	chr5	140857995	140857996	CGI	TRUE	TRUE	FALSE	-0.33344	-1.04162	0.446134	0.3321
cg00589850	56114	PCDHGA1	chr5	140857995	140857996	CGI	TRUE	TRUE	FALSE	-0.33344	-1.04162	0.446134	0.3321
cg00589850	56101	PCDHGB5	chr5	140857995	140857996	CGI	TRUE	TRUE	FALSE	-0.33344	-1.04162	0.446134	0.3321
cg00589850	56109	PCDHGA6	chr5	140857995	140857996	CGI	TRUE	TRUE	FALSE	-0.33344	-1.04162	0.446134	0.3321
cg00589850	8641	PCDHGB4	chr5	140857995	140857996	CGI	TRUE	TRUE	FALSE	-0.33344	-1.04162	0.446134	0.3321
cg00589850	56106	PCDHGA10	chr5	140857995	140857996	CGI	TRUE	TRUE	FALSE	-0.33344	-1.04162	0.446134	0.3321
cg00589850	5098	PCDHGC3	chr5	140857995	140857996	CGI	TRUE	TRUE	FALSE	-0.33344	-1.04162	0.446134	0.3321
cg00590639	7297	TYK2	chr19	10464771	10464772	CGI	FALSE	TRUE	FALSE	5.14983	4.29217	0.972042	0.94444
cg00591153	6474	SHOX2	chr3	157824910	157824911	CGI	TRUE	FALSE	FALSE	-1.47264	-2.28129	0.268101	0.173932
cg00591333	9625	AATK	chr17	79109910	79109911	CGI-N-Shore	FALSE	TRUE	FALSE	1.16728	0.475002	0.685598	0.579801
cg00593243	1843	DUSP1	chr5	172196153	172196154	CGI-N-Shore	FALSE	TRUE	FALSE	2.19689	-0.979285	0.807302	0.358857
cg00593404	9697	TRAM2	chr6	52377740	52377741	Non-CGI	FALSE	TRUE	FALSE	1.39167	-1.08131	0.714129	0.331432
cg00593404	114327	EFHC1	chr6	52377740	52377741	Non-CGI	FALSE	TRUE	FALSE	1.39167	-1.08131	0.714129	0.331432
cg00594129	1879	EBF1	chr5	158524270	158524271	CGI	TRUE	TRUE	FALSE	-0.615677	-1.92455	0.403064	0.227651
cg00594148	3931	LCAT	chr16	67979437	67979438	CGI-N-Shore	TRUE	TRUE	FALSE	2.95279	1.81923	0.884041	0.776119
cg00594148	6560	SLC12A4	chr16	67979437	67979438	CGI-N-Shore	TRUE	TRUE	FALSE	2.95279	1.81923	0.884041	0.776119
cg00594561	1747	DLX3	chr17	48073423	48073424	CGI-S-Shore	TRUE	FALSE	FALSE	1.76626	0.995504	0.770602	0.660823
cg00595472	745	MYRF	chr11	61525251	61525252	Non-CGI	TRUE	TRUE	FALSE	3.62996	2.83487	0.923756	0.868985
cg00595472	26070	DKFZP434K028	chr11	61525251	61525252	Non-CGI	TRUE	TRUE	FALSE	3.62996	2.83487	0.923756	0.868985
cg00596222	NA	NA	chr4	3756001	3756002	Non-CGI	FALSE	FALSE	TRUE	2.55469	1.71131	0.851719	0.750324
cg00596763	389332	LOC389332	chr5	135529293	135529294	CGI-S-Shore	TRUE	FALSE	FALSE	3.57856	2.6054	0.920807	0.854322
cg00596833	NA	NA	chr4	15914842	15914843	Non-CGI	FALSE	FALSE	TRUE	4.30191	3.36475	0.950573	0.905073
cg00597076	4641	MYO1C	chr17	1395880	1395881	CGI-S-Shore	TRUE	FALSE	FALSE	1.15025	0.421177	0.685568	0.56959
cg00597607	8532	CPZ	chr4	8592328	8592329	CGI-S-Shelf	FALSE	TRUE	FALSE	2.02718	1.18856	0.799094	0.692737
cg00597801	641518	LEF1-AS1	chr4	109092918	109092919	CGI	TRUE	TRUE	FALSE	-1.02058	-1.87801	0.34603	0.223341
cg00598204	79058	ASPSCR1	chr17	79961522	79961523	CGI-N-Shore	FALSE	TRUE	FALSE	-1.65798	-2.51842	0.245357	0.15042
cg00598429	80320	SP6	chr17	45928250	45928251	CGI	FALSE	TRUE	FALSE	-0.659659	-1.6936	0.393614	0.264977
cg00598553	NA	NA	chr16	49918219	49918220	Non-CGI	FALSE	FALSE	TRUE	3.38384	2.35804	0.90979	0.832936
cg00598956	57619	SHROOM3	chr4	77409957	77409958	Non-CGI	FALSE	TRUE	FALSE	3.35177	2.62777	0.906747	0.852817
cg00599124	79791	FBXO31	chr16	87378824	87378825	CGI-S-Shore	FALSE	TRUE	FALSE	2.61317	0.114125	0.851826	0.515718
cg00599163	NA	NA	chr2	162100495	162100496	CGI-N-Shore	TRUE	FALSE	FALSE	4.54406	3.8532	0.958141	0.933678
cg00599564	3137	HLA-J	chr6	29943209	29943210	CGI-N-Shore	TRUE	TRUE	FALSE	-0.854086	-1.89596	0.365891	0.223016
cg00599564	3136	HLA-H	chr6	29943209	29943210	CGI-N-Shore	TRUE	TRUE	FALSE	-0.854086	-1.89596	0.365891	0.223016
cg00599564	10255	HCG9	chr6	29943209	29943210	CGI-N-Shore	TRUE	TRUE	FALSE	-0.854086	-1.89596	0.365891	0.223016
cg00599564	3135	HLA-G	chr6	29943209	29943210	CGI-N-Shore	TRUE	TRUE	FALSE	-0.854086	-1.89596	0.365891	0.223016
cg00599770	3204	HOXA7	chr7	27196825	27196826	CGI	TRUE	FALSE	FALSE	1.01253	0.278324	0.659445	0.544433
cg00600454	NA	NA	chr1	65468017	65468018	CGI	TRUE	FALSE	FALSE	1.48614	-0.287709	0.727191	0.458611
cg00601711	10723	SLC12A7	chr5	1089507	1089508	CGI-S-Shore	FALSE	TRUE	FALSE	2.7113	2.03908	0.862755	0.795229
cg00601836	2099	ESR1	chr6	152130332	152130333	CGI	FALSE	TRUE	FALSE	3.87154	2.03954	0.934498	0.793262
cg00601916	388595	TMEM82	chr1	16069388	16069389	CGI-N-Shore	FALSE	TRUE	FALSE	0.170292	-0.451526	0.528562	0.42439
cg00602416	NA	NA	chr10	21797819	21797820	CGI	FALSE	FALSE	TRUE	2.19728	0.931209	0.815848	0.650519
cg00603097	125704	FAM69C	chr18	72125359	72125360	CGI	TRUE	FALSE	FALSE	0.557466	-0.430108	0.59325	0.427898
cg00604640	401388	C7orf76	chr7	96133485	96133486	Non-CGI	TRUE	FALSE	FALSE	2.20631	1.57725	0.817152	0.742395
cg00607051	389257	LRRC14B	chr5	191500	191501	CGI	TRUE	FALSE	FALSE	-1.16755	-2.10657	0.312097	0.189337
cg00607154	11044	PAPD7	chr5	6754116	6754117	CGI-S-Shore	FALSE	TRUE	FALSE	3.52581	2.6093	0.915919	0.850326
cg00607609	171024	SYNPO2	chr4	119962922	119962923	Non-CGI	FALSE	TRUE	FALSE	3.53024	2.87273	0.919077	0.872509
cg00607755	91461	PKDCC	chr2	42274082	42274083	CGI-N-Shore	TRUE	FALSE	FALSE	1.39657	0.282704	0.720298	0.547171
cg00608661	50515	CHST11	chr12	105065028	105065029	Non-CGI	FALSE	TRUE	FALSE	3.85542	1.77056	0.933526	0.742554
cg00608779	51450	PRRX2	chr9	132436490	132436491	CGI-S-Shelf	FALSE	TRUE	FALSE	4.11905	3.17291	0.94479	0.895378
cg00609473	161253	REM2	chr14	23351842	23351843	CGI-N-Shelf	TRUE	FALSE	FALSE	-0.960287	-1.64625	0.340205	0.24569
cg00610508	115	ADCY9	chr16	4013337	4013338	CGI	FALSE	TRUE	FALSE	2.52539	0.393142	0.83746	0.558924
cg00610692	6242	RTKN	chr2	74668072	74668073	CGI	TRUE	TRUE	FALSE	-0.0386002	-1.35159	0.493578	0.28492
cg00610844	255167	LINC01018	chr5	6583797	6583798	CGI	TRUE	TRUE	FALSE	0.220988	-0.619656	0.537411	0.406559
cg00611495	146336	SSTR5-AS1	chr16	1120275	1120276	CGI-N-Shore	FALSE	TRUE	FALSE	-1.10785	-2.29225	0.327988	0.175574
cg00611614	724031	MIR661	chr8	145019630	145019631	CGI-S-Shore	TRUE	TRUE	FALSE	2.15611	0.559599	0.812436	0.593233
cg00611614	5339	PLEC	chr8	145019630	145019631	CGI-S-Shore	TRUE	TRUE	FALSE	2.15611	0.559599	0.812436	0.593233
cg00612299	5731	PTGER1	chr19	14584761	14584762	CGI	FALSE	TRUE	FALSE	-0.710099	-1.40707	0.382001	0.278526
cg00614360	6904	TBCD	chr17	80858406	80858407	CGI	FALSE	TRUE	FALSE	1.2226	0.0292129	0.684181	0.507982
cg00614834	7923	HSD17B8	chr6	33172869	33172870	CGI-S-Shore	FALSE	TRUE	FALSE	-0.678268	-1.96509	0.386152	0.207303
cg00615592	NA	NA	chr6	158937125	158937126	CGI	FALSE	FALSE	TRUE	2.50794	1.47649	0.843061	0.730169
cg00615746	1583	CYP11A1	chr15	74658981	74658982	CGI-S-Shore	TRUE	TRUE	FALSE	3.56998	2.70234	0.920821	0.858816
cg00616135	114294	LACTB	chr15	63413614	63413615	CGI-N-Shore	TRUE	FALSE	FALSE	-1.17279	-1.8638	0.309375	0.218454
cg00616687	6493	SIM2	chr21	38072186	38072187	CGI	TRUE	FALSE	FALSE	-1.70453	-2.59449	0.257877	0.146655
cg00616922	83752	LONP2	chr16	48386789	48386790	Non-CGI	FALSE	TRUE	FALSE	3.25042	2.46872	0.90287	0.841006
cg00616922	100616339	MIR548AE2	chr16	48386789	48386790	Non-CGI	FALSE	TRUE	FALSE	3.25042	2.46872	0.90287	0.841006
cg00617064	NA	NA	chr2	27272375	27272376	CGI-N-Shore	TRUE	FALSE	FALSE	3.21581	2.56915	0.898745	0.845789
cg00618626	3728	JUP	chr17	39807901	39807902	CGI-S-Shelf	FALSE	TRUE	FALSE	3.26052	2.51956	0.903965	0.843105
cg00618711	146433	IL34	chr16	70688052	70688053	CGI-N-Shore	FALSE	TRUE	FALSE	-0.399292	-2.04001	0.434871	0.208795
cg00619188	164656	TMPRSS6	chr22	37493456	37493457	CGI-N-Shore	FALSE	TRUE	FALSE	1.39436	0.491165	0.717623	0.58216
cg00619263	100996485	LOC100996485	chr5	134471974	134471975	Non-CGI	FALSE	TRUE	FALSE	2.77458	-0.313918	0.861177	0.451274
cg00619561	NA	NA	chr13	112980676	112980677	CGI	FALSE	FALSE	TRUE	0.973183	-0.595463	0.660206	0.408795
cg00620628	NA	NA	chr2	238165917	238165918	Non-CGI	FALSE	FALSE	TRUE	3.29341	0.0522539	0.90016	0.503115
cg00621197	6285	S100B	chr21	48018790	48018791	CGI	FALSE	TRUE	FALSE	3.57418	2.40185	0.920198	0.828685
cg00621247	NA	NA	chr5	1949277	1949278	CGI-S-Shore	FALSE	FALSE	TRUE	1.19613	-0.00380804	0.688142	0.493444
cg00621899	402682	UFSP1	chr7	100486423	100486424	CGI-S-Shore	TRUE	FALSE	FALSE	3.40088	2.51384	0.907033	0.839555
cg00622010	358	AQP1	chr7	30951086	30951087	CGI-N-Shore	TRUE	TRUE	FALSE	1.6384	0.73644	0.750936	0.619521
cg00622170	8602	NOP14	chr4	2944594	2944595	CGI	FALSE	TRUE	FALSE	2.46733	1.78684	0.843233	0.765959
cg00622170	317648	NOP14-AS1	chr4	2944594	2944595	CGI	FALSE	TRUE	FALSE	2.46733	1.78684	0.843233	0.765959
cg00622749	NA	NA	chr10	43689584	43689585	Non-CGI	FALSE	FALSE	TRUE	1.89039	1.27139	0.781991	0.704708
cg00622799	51750	RTEL1	chr20	62318588	62318589	CGI	FALSE	TRUE	FALSE	-0.0583158	-1.71598	0.492319	0.248237
cg00622799	100533107	RTEL1-TNFRSF6B	chr20	62318588	62318589	CGI	FALSE	TRUE	FALSE	-0.0583158	-1.71598	0.492319	0.248237
cg00623200	57722	IGDCC4	chr15	65715801	65715802	CGI-S-Shore	TRUE	FALSE	FALSE	1.13141	0.411997	0.681148	0.569211
cg00624212	23218	NBEAL2	chr3	47020760	47020761	CGI-N-Shore	TRUE	FALSE	FALSE	-0.733804	-1.96137	0.378605	0.207492
cg00624212	151903	CCDC12	chr3	47020760	47020761	CGI-N-Shore	TRUE	FALSE	FALSE	-0.733804	-1.96137	0.378605	0.207492
cg00624410	221184	CPNE2	chr16	57127968	57127969	CGI-S-Shore	FALSE	TRUE	FALSE	2.46121	1.48574	0.840356	0.729599
cg00624418	7015	TERT	chr5	1282357	1282358	CGI-S-Shore	FALSE	TRUE	FALSE	-0.657288	-2.03868	0.392417	0.209304
cg00624477	NA	NA	chr7	1406560	1406561	CGI-N-Shore	FALSE	FALSE	TRUE	1.96764	0.636028	0.791712	0.603653
cg00624737	2300	FOXL1	chr16	86613641	86613642	CGI	TRUE	FALSE	FALSE	2.81362	1.38444	0.871905	0.699706
cg00624908	63976	PRDM16	chr1	3327395	3327396	CGI-S-Shore	FALSE	TRUE	FALSE	2.72009	1.51877	0.864077	0.730728
cg00625776	3856	KRT8	chr12	53297384	53297385	CGI	FALSE	TRUE	FALSE	-1.05295	-1.73542	0.326032	0.232075
cg00625783	NA	NA	chr17	43222106	43222107	CGI	FALSE	FALSE	TRUE	-1.78457	-2.54028	0.227061	0.147855
cg00626412	NA	NA	chr10	44195456	44195457	CGI-N-Shelf	FALSE	FALSE	TRUE	3.8371	1.86125	0.933724	0.767208
cg00626856	50805	IRX4	chr5	1885950	1885951	CGI	FALSE	FALSE	TRUE	0.744559	-0.760328	0.622457	0.379106
cg00627347	29	ABR	chr17	915265	915266	CGI	TRUE	TRUE	FALSE	4.19178	3.18938	0.946915	0.889458
cg00628277	6904	TBCD	chr17	80875739	80875740	CGI-N-Shore	FALSE	TRUE	FALSE	1.65272	0.742709	0.755862	0.622535
cg00630164	9132	KCNQ4	chr1	41250062	41250063	CGI	TRUE	FALSE	FALSE	-0.270321	-1.74119	0.454553	0.233394
cg00630775	9759	HDAC4	chr2	239988369	239988370	CGI-N-Shore	FALSE	TRUE	FALSE	2.74977	2.09233	0.866927	0.794663
cg00631221	85021	REPS1	chr6	139307985	139307986	CGI-N-Shore	FALSE	TRUE	FALSE	-0.344042	-1.93279	0.445453	0.214995
cg00632007	NA	NA	chr6	1598984	1598985	CGI	FALSE	FALSE	TRUE	3.21875	2.27422	0.89995	0.814211
cg00632364	NA	NA	chr6	170401305	170401306	CGI-S-Shore	FALSE	FALSE	TRUE	0.10494	-0.872187	0.519846	0.364006
cg00632575	80028	FBXL18	chr7	5539927	5539928	CGI-N-Shore	FALSE	TRUE	FALSE	3.83919	2.96917	0.93367	0.876308
cg00633768	283383	GPR133	chr12	131496287	131496288	CGI	FALSE	TRUE	FALSE	0.8704	0.245354	0.641547	0.54011
cg00635082	643201	LOC643201	chr5	175619368	175619369	CGI-N-Shore	FALSE	TRUE	FALSE	1.78116	1.0441	0.766495	0.664938
cg00636982	NA	NA	chr13	37986386	37986387	Non-CGI	FALSE	FALSE	TRUE	3.35577	-0.003704	0.903381	0.505324
cg00637085	NA	NA	chr5	126952391	126952392	Non-CGI	FALSE	FALSE	TRUE	3.65161	2.93225	0.924349	0.879595
cg00637144	79758	DHRS12	chr13	52360268	52360269	Non-CGI	FALSE	TRUE	FALSE	2.04172	-0.562816	0.795139	0.409512
cg00637695	9627	SNCAIP	chr5	121759771	121759772	Non-CGI	FALSE	TRUE	FALSE	2.54784	1.78071	0.851038	0.763936
cg00637745	2736	GLI2	chr2	121497334	121497335	CGI-N-Shore	FALSE	TRUE	FALSE	3.18798	2.45758	0.899022	0.823066
cg00638021	1277	COL1A1	chr17	48267062	48267063	Non-CGI	FALSE	TRUE	FALSE	1.35308	-0.4966	0.702645	0.428048
cg00638574	148304	C1orf74	chr1	209956565	209956566	CGI-N-Shore	TRUE	TRUE	FALSE	2.1685	1.14448	0.805748	0.677881
cg00638945	5727	PTCH1	chr9	98266643	98266644	CGI-N-Shore	FALSE	TRUE	FALSE	0.473561	-0.99423	0.580235	0.342015
cg00639010	5154	PDGFA	chr7	553693	553694	CGI	TRUE	TRUE	FALSE	0.948122	-0.539506	0.651967	0.417242
cg00639447	340745	LRIT2	chr10	85985296	85985297	Non-CGI	TRUE	FALSE	FALSE	0.986664	0.145706	0.65906	0.52339
cg00639475	160313	KRT19P2	chr12	95228478	95228479	Non-CGI	TRUE	FALSE	FALSE	2.66818	1.62201	0.861521	0.745496
cg00639656	6147	RPL23A	chr17	27050360	27050361	CGI-S-Shelf	TRUE	TRUE	FALSE	0.790871	0.160869	0.629651	0.527477
cg00639656	26772	SNORD4B	chr17	27050360	27050361	CGI-S-Shelf	TRUE	TRUE	FALSE	0.790871	0.160869	0.629651	0.527477
cg00639656	26809	SNORD42A	chr17	27050360	27050361	CGI-S-Shelf	TRUE	TRUE	FALSE	0.790871	0.160869	0.629651	0.527477
cg00640087	100532732	MSH5-SAPCD1	chr6	31707202	31707203	CGI-N-Shore	TRUE	FALSE	FALSE	-0.0130979	-1.26927	0.497918	0.298076
cg00640719	6483	ST3GAL2	chr16	70426268	70426269	Non-CGI	FALSE	TRUE	FALSE	0.476289	-1.66934	0.580103	0.248091
cg00642359	6910	TBX5	chr12	114841708	114841709	CGI	TRUE	TRUE	FALSE	2.25071	1.57599	0.822007	0.730477
cg00643145	NA	NA	chr16	11482317	11482318	Non-CGI	FALSE	FALSE	TRUE	2.56202	1.79907	0.85235	0.766858
cg00643392	83546	RTBDN	chr19	12946856	12946857	CGI-S-Shore	TRUE	FALSE	FALSE	0.102296	-0.616264	0.517442	0.40458
cg00643876	57465	TBC1D24	chr16	2550122	2550123	CGI-N-Shore	FALSE	TRUE	FALSE	1.88173	1.18329	0.779684	0.688778
cg00644107	83886	PRSS27	chr16	2762673	2762674	CGI	FALSE	TRUE	FALSE	2.74199	2.12863	0.863083	0.805085
cg00644847	NA	NA	chr1	6787585	6787586	Non-CGI	FALSE	FALSE	TRUE	1.20446	0.531571	0.693308	0.588011
cg00646037	NA	NA	chr5	66601306	66601307	Non-CGI	FALSE	FALSE	TRUE	3.90868	3.21371	0.936322	0.894558
cg00646084	11096	ADAMTS5	chr21	28337168	28337169	CGI-N-Shore	FALSE	TRUE	FALSE	0.388754	-1.15924	0.556579	0.319653
cg00646216	NA	NA	chr16	73210822	73210823	CGI-S-Shelf	FALSE	FALSE	TRUE	1.08734	-0.91056	0.663297	0.350143
cg00646396	NA	NA	chr1	26482755	26482756	Non-CGI	FALSE	FALSE	TRUE	0.408295	-1.21233	0.567621	0.309766
cg00647232	89866	SEC16B	chr1	177938408	177938409	Non-CGI	FALSE	TRUE	FALSE	2.48861	1.21612	0.841428	0.69479
cg00647246	NA	NA	chr7	157071437	157071438	CGI-N-Shore	FALSE	FALSE	TRUE	3.39072	1.79287	0.909356	0.744488
cg00647262	729515	TMEM242	chr6	157746584	157746585	CGI-S-Shore	TRUE	FALSE	FALSE	1.16535	0.495809	0.688685	0.58169
cg00647810	9543	IGDCC3	chr15	65622990	65622991	CGI-N-Shelf	TRUE	TRUE	FALSE	1.91178	0.218111	0.783874	0.538081
cg00648452	NA	NA	chr10	3537285	3537286	CGI-S-Shore	FALSE	TRUE	FALSE	4.12188	2.84014	0.94497	0.846473
cg00650176	494558	C9orf135-AS1	chr9	72435576	72435577	CGI	TRUE	FALSE	FALSE	1.5395	-0.0588915	0.735256	0.49227
cg00650176	138255	C9orf135	chr9	72435576	72435577	CGI	TRUE	FALSE	FALSE	1.5395	-0.0588915	0.735256	0.49227
cg00650386	8671	SLC4A4	chr4	72248830	72248831	Non-CGI	FALSE	TRUE	FALSE	3.55297	2.45147	0.920309	0.831573
cg00650953	26047	CNTNAP2	chr7	147500503	147500504	CGI-S-Shore	FALSE	TRUE	FALSE	2.31775	1.52463	0.827202	0.738099
cg00651087	2253	FGF8	chr10	103539519	103539520	CGI	FALSE	TRUE	FALSE	-1.82905	-2.58404	0.222343	0.143912
cg00651400	NA	NA	chr6	3230007	3230008	CGI	FALSE	TRUE	FALSE	1.42296	-0.144738	0.711855	0.474676
cg00651488	NA	NA	chr16	85236465	85236466	Non-CGI	FALSE	FALSE	TRUE	0.258964	-0.471924	0.543773	0.426007
cg00651497	2200	FBN1	chr15	48829009	48829010	Non-CGI	FALSE	TRUE	FALSE	4.03754	0.569648	0.941054	0.5899
cg00653025	NA	NA	chr16	89571489	89571490	CGI-N-Shelf	FALSE	FALSE	TRUE	3.27789	1.95881	0.904637	0.777793
cg00653085	55268	ECHDC2	chr1	53385434	53385435	CGI-N-Shore	FALSE	TRUE	FALSE	3.86045	2.60779	0.935224	0.837955
cg00653460	6152	RPL24	chr3	101406220	101406221	CGI-S-Shore	TRUE	FALSE	FALSE	-0.308969	-0.965935	0.447493	0.342646
cg00653790	NA	NA	chr15	78031418	78031419	Non-CGI	FALSE	FALSE	TRUE	0.725748	-0.769886	0.616002	0.384965
cg00653997	8448	DOC2A	chr16	30018549	30018550	CGI-S-Shore	FALSE	TRUE	FALSE	2.70422	1.68562	0.862978	0.757466
cg00653997	552900	BOLA2	chr16	30018549	30018550	CGI-S-Shore	FALSE	TRUE	FALSE	2.70422	1.68562	0.862978	0.757466
cg00654888	2019	EN1	chr2	119603133	119603134	CGI	FALSE	TRUE	FALSE	1.79133	-0.063667	0.757883	0.489695
cg00655143	NA	NA	chr16	3985958	3985959	CGI-N-Shelf	FALSE	FALSE	TRUE	3.87186	3.23755	0.934141	0.895739
cg00655552	NA	NA	chr4	182862370	182862371	Non-CGI	FALSE	FALSE	TRUE	3.16519	1.77691	0.895132	0.754001
cg00655706	10422	UBAC1	chr9	138852191	138852192	CGI-N-Shore	FALSE	TRUE	FALSE	1.60398	0.83053	0.741795	0.636423
cg00656478	51450	PRRX2	chr9	132480963	132480964	CGI-N-Shore	FALSE	TRUE	FALSE	3.60733	2.08898	0.920472	0.793483
cg00656820	65062	TMEM237	chr2	202506468	202506469	CGI-N-Shore	FALSE	TRUE	FALSE	2.57501	1.72889	0.850888	0.753236
cg00656881	199990	C1orf86	chr1	2138757	2138758	CGI-S-Shore	FALSE	TRUE	FALSE	-0.561571	-2.01675	0.407026	0.202738
cg00657094	NA	NA	chr1	1174190	1174191	CGI	FALSE	FALSE	TRUE	1.20168	-0.386589	0.692076	0.437828
cg00657287	167465	ZNF366	chr5	71755571	71755572	CGI-N-Shore	FALSE	TRUE	FALSE	4.09694	3.38184	0.943016	0.910387
cg00657460	6925	TCF4	chr18	52901961	52901962	Non-CGI	FALSE	TRUE	FALSE	0.686709	-0.288126	0.613312	0.453713
cg00658082	6242	RTKN	chr2	74669380	74669381	CGI	TRUE	FALSE	FALSE	0.928611	-0.176887	0.651627	0.469675
cg00658151	9672	SDC3	chr1	31368797	31368798	Non-CGI	FALSE	TRUE	FALSE	3.01649	1.48948	0.886889	0.725453
cg00658440	NA	NA	chr12	91774944	91774945	Non-CGI	FALSE	FALSE	TRUE	0.857351	-0.103412	0.636548	0.482263
cg00659204	NA	NA	chr4	137018292	137018293	CGI-N-Shore	FALSE	FALSE	TRUE	1.22529	0.521184	0.695036	0.587092
cg00659931	5046	PCSK6	chr15	102010125	102010126	CGI-S-Shore	FALSE	TRUE	FALSE	2.31688	0.971743	0.824232	0.655594
cg00660305	5575	PRKAR1B	chr7	597575	597576	CGI	FALSE	TRUE	FALSE	0.350308	-1.16125	0.558469	0.314545
cg00660765	23150	FRMD4B	chr3	69371349	69371350	Non-CGI	TRUE	TRUE	FALSE	3.05697	1.19669	0.885699	0.684991
cg00661970	NA	NA	chr12	115135027	115135028	CGI	FALSE	FALSE	TRUE	0.345298	-1.08217	0.54765	0.328243
cg00662002	23368	PPP1R13B	chr14	104314734	104314735	CGI	TRUE	TRUE	FALSE	-0.425645	-1.29282	0.428279	0.293551
cg00662002	145216	LINC00637	chr14	104314734	104314735	CGI	TRUE	TRUE	FALSE	-0.425645	-1.29282	0.428279	0.293551
cg00662400	NA	NA	chr16	88510783	88510784	CGI-S-Shore	FALSE	FALSE	TRUE	-0.586187	-1.43799	0.40309	0.286599
cg00663183	NA	NA	chr3	15687950	15687951	Non-CGI	FALSE	FALSE	TRUE	-0.356419	-1.97948	0.445069	0.220675
cg00663832	170954	PPP1R18	chr6	30646846	30646847	CGI-N-Shore	FALSE	TRUE	FALSE	0.491585	-0.72029	0.581977	0.381654
cg00663986	6904	TBCD	chr17	80866232	80866233	CGI-S-Shore	TRUE	TRUE	FALSE	2.36814	1.46222	0.829407	0.71643
cg00664054	80346	REEP4	chr8	21998309	21998310	CGI-S-Shore	FALSE	TRUE	FALSE	1.90957	0.814386	0.783643	0.631415
cg00664205	146713	RBFOX3	chr17	77397758	77397759	CGI-S-Shore	FALSE	TRUE	FALSE	3.51394	2.2907	0.916257	0.808346
cg00664405	NA	NA	chr6	1382670	1382671	CGI	FALSE	FALSE	TRUE	-2.96017	-3.75468	0.125313	0.069764
cg00664416	149175	MANEAL	chr1	38261192	38261193	CGI-S-Shore	TRUE	TRUE	FALSE	-0.0839906	-0.759133	0.485516	0.375224
cg00664730	NA	NA	chr6	168393930	168393931	CGI	FALSE	TRUE	FALSE	2.06847	-0.00798141	0.802386	0.50004
cg00665971	8739	HRK	chr12	117317770	117317771	CGI	FALSE	TRUE	FALSE	-0.798391	-1.55265	0.368174	0.264951
cg00667647	NA	NA	chr1	119542475	119542476	CGI	FALSE	FALSE	TRUE	4.02069	2.84865	0.94044	0.860554
cg00667680	NA	NA	chr8	1913269	1913270	CGI	FALSE	FALSE	TRUE	3.33398	2.65616	0.908358	0.860518
cg00667789	4070	TACSTD2	chr1	59042065	59042066	CGI	TRUE	FALSE	FALSE	-1.28858	-2.11768	0.300813	0.192434
cg00668685	283375	SLC39A5	chr12	56624552	56624553	Non-CGI	TRUE	TRUE	FALSE	3.13491	2.36945	0.897246	0.831852
cg00669347	NA	NA	chr16	86767757	86767758	CGI	FALSE	FALSE	TRUE	2.95851	1.87545	0.884508	0.778542
cg00669390	NA	NA	chr16	85348945	85348946	CGI-N-Shore	FALSE	FALSE	TRUE	1.81023	0.534386	0.775238	0.588987
cg00671224	NA	NA	chr12	10770150	10770151	CGI-S-Shelf	FALSE	FALSE	TRUE	3.5031	2.86547	0.917249	0.872458
cg00671823	2975	GTF3C1	chr16	27558770	27558771	CGI-N-Shelf	FALSE	TRUE	FALSE	3.19994	0.648438	0.900542	0.596411
cg00672633	NA	NA	chr6	7481682	7481683	CGI	FALSE	FALSE	TRUE	3.62265	2.46711	0.919739	0.841886
cg00674003	NA	NA	chr17	66832096	66832097	Non-CGI	FALSE	FALSE	TRUE	3.89041	3.16589	0.935148	0.89752
cg00674679	NA	NA	chr2	176931680	176931681	CGI	FALSE	FALSE	TRUE	0.16207	-0.491147	0.526361	0.417546
cg00675336	401164	LINC01060	chr4	189330030	189330031	CGI-N-Shelf	FALSE	TRUE	FALSE	1.37523	-0.851691	0.710505	0.371867
cg00675650	57552	NCEH1	chr3	172429335	172429336	CGI-S-Shore	TRUE	FALSE	FALSE	-2.24157	-3.08404	0.189024	0.106089
cg00675737	29123	ANKRD11	chr16	89462359	89462360	CGI-S-Shore	FALSE	TRUE	FALSE	1.92878	0.691534	0.780141	0.613792
cg00675878	613	BCR	chr22	23521267	23521268	CGI-N-Shore	TRUE	FALSE	FALSE	0.295918	-0.897014	0.545964	0.355268
cg00676030	2260	FGFR1	chr8	38307962	38307963	Non-CGI	FALSE	TRUE	FALSE	-0.809675	-1.82627	0.365883	0.221562
cg00676801	6772	STAT1	chr2	191876673	191876674	CGI-N-Shore	FALSE	TRUE	FALSE	3.73403	3.11621	0.925541	0.88995
cg00677272	NA	NA	chr14	59213434	59213435	Non-CGI	FALSE	FALSE	TRUE	2.94745	1.70771	0.882622	0.753897
cg00677334	NA	NA	chr16	68765982	68765983	Non-CGI	FALSE	FALSE	TRUE	1.45092	-0.216364	0.718662	0.46899
cg00679520	57460	PPM1H	chr12	63133578	63133579	Non-CGI	FALSE	TRUE	FALSE	3.50854	1.81115	0.914235	0.758905
cg00679792	55501	CHST12	chr7	2441416	2441417	CGI-N-Shore	TRUE	FALSE	FALSE	3.92792	2.68692	0.936497	0.855891
cg00680277	51112	TRAPPC12	chr2	3465103	3465104	CGI	FALSE	TRUE	FALSE	2.9483	2.12949	0.882995	0.800687
cg00681365	23284	LPHN3	chr4	62387003	62387004	Non-CGI	FALSE	TRUE	FALSE	2.79205	1.21183	0.85855	0.692569
cg00682069	7837	PXDN	chr2	1667458	1667459	CGI	FALSE	TRUE	FALSE	3.40756	2.6491	0.911288	0.850928
cg00682096	404266	HOXB-AS3	chr17	46672924	46672925	CGI	TRUE	TRUE	FALSE	2.90918	0.724865	0.879319	0.617729
cg00682096	3215	HOXB5	chr17	46672924	46672925	CGI	TRUE	TRUE	FALSE	2.90918	0.724865	0.879319	0.617729
cg00683332	NA	NA	chr16	51188697	51188698	CGI	FALSE	FALSE	TRUE	2.15327	0.975811	0.798773	0.650683
cg00684423	2852	GPER1	chr7	1125180	1125181	CGI-S-Shore	TRUE	TRUE	FALSE	4.24524	3.08697	0.949445	0.883462
cg00684423	84310	C7orf50	chr7	1125180	1125181	CGI-S-Shore	TRUE	TRUE	FALSE	4.24524	3.08697	0.949445	0.883462
cg00684497	401399	PRRT4	chr7	128002177	128002178	CGI-S-Shore	TRUE	FALSE	FALSE	-0.952043	-1.77408	0.344966	0.235868
cg00685014	79026	AHNAK	chr11	62212195	62212196	CGI-S-Shore	FALSE	TRUE	FALSE	0.886244	-1.75532	0.63218	0.240586
cg00685319	100652883	ALOX15P1	chr17	6560967	6560968	CGI-S-Shore	FALSE	FALSE	TRUE	1.49921	0.608332	0.735651	0.602275
cg00685622	NA	NA	chr16	85373209	85373210	CGI	FALSE	FALSE	TRUE	3.42714	2.52069	0.912226	0.837549
cg00686132	4301	MLLT4	chr6	168257835	168257836	Non-CGI	FALSE	TRUE	FALSE	1.84893	0.430611	0.773999	0.570259
cg00686826	NA	NA	chr2	637564	637565	CGI	FALSE	FALSE	TRUE	2.82264	1.99567	0.872539	0.78846
cg00687306	NA	NA	chr15	37398943	37398944	CGI	FALSE	FALSE	TRUE	1.09827	-0.351666	0.67812	0.449771
cg00687612	26153	KIF26A	chr14	104625920	104625921	CGI	FALSE	TRUE	FALSE	3.5968	1.85323	0.921832	0.75999
cg00689225	4792	NFKBIA	chr14	35871954	35871955	CGI-N-Shore	FALSE	TRUE	FALSE	1.95851	0.37199	0.782845	0.55542
cg00689340	6242	RTKN	chr2	74668672	74668673	CGI	TRUE	TRUE	FALSE	0.580228	-0.63985	0.595266	0.398158
cg00689612	100653515	LOC100653515	chr17	76899627	76899628	CGI-S-Shelf	TRUE	TRUE	FALSE	3.60284	2.32729	0.919395	0.820166
cg00689612	7077	TIMP2	chr17	76899627	76899628	CGI-S-Shelf	TRUE	TRUE	FALSE	3.60284	2.32729	0.919395	0.820166
cg00689651	4784	NFIX	chr19	13209548	13209549	CGI	FALSE	TRUE	FALSE	1.87069	0.323059	0.780006	0.552972
cg00690082	6776	STAT5A	chr17	40438511	40438512	CGI-N-Shore	TRUE	FALSE	FALSE	0.811307	-0.429213	0.631959	0.42702
cg00690143	84182	FAM188B	chr7	30810858	30810859	CGI-N-Shore	TRUE	TRUE	FALSE	-1.58936	-2.38951	0.250952	0.161276
cg00690143	100526825	INMT-FAM188B	chr7	30810858	30810859	CGI-N-Shore	TRUE	TRUE	FALSE	-1.58936	-2.38951	0.250952	0.161276
cg00690195	NA	NA	chr8	8915582	8915583	Non-CGI	FALSE	FALSE	TRUE	-0.13975	-1.89537	0.476836	0.215575
cg00690402	404266	HOXB-AS3	chr17	46669566	46669567	CGI	TRUE	TRUE	FALSE	3.27693	0.828228	0.905043	0.624401
cg00690402	3215	HOXB5	chr17	46669566	46669567	CGI	TRUE	TRUE	FALSE	3.27693	0.828228	0.905043	0.624401
cg00690402	3213	HOXB3	chr17	46669566	46669567	CGI	TRUE	TRUE	FALSE	3.27693	0.828228	0.905043	0.624401
cg00690609	NA	NA	chr10	72218900	72218901	CGI	FALSE	FALSE	TRUE	-0.123086	-1.03183	0.479294	0.333286
cg00691266	2125	EVPL	chr17	74015089	74015090	CGI-S-Shelf	TRUE	TRUE	FALSE	3.42342	2.10714	0.913292	0.795527
cg00691586	11214	AKAP13	chr15	86160762	86160763	Non-CGI	FALSE	TRUE	FALSE	2.17307	-1.21283	0.806097	0.319059
cg00691625	2516	NR5A1	chr9	127269807	127269808	CGI-S-Shore	TRUE	FALSE	FALSE	2.19276	1.4338	0.814417	0.720751
cg00691874	124935	SLC43A2	chr17	1521312	1521313	CGI-N-Shore	FALSE	TRUE	FALSE	1.52462	-1.19213	0.735503	0.326513
cg00691974	133121	ENPP6	chr4	185087958	185087959	CGI-N-Shore	FALSE	TRUE	FALSE	1.93213	0.448467	0.790956	0.575571
cg00692611	5308	PITX2	chr4	111551139	111551140	CGI	FALSE	TRUE	FALSE	3.61054	-0.593832	0.923004	0.404204
cg00693419	3778	KCNMA1	chr10	79325320	79325321	Non-CGI	FALSE	TRUE	FALSE	2.97964	1.79942	0.879879	0.761569
cg00693599	54461	FBXW5	chr9	139836323	139836324	CGI	FALSE	TRUE	FALSE	3.14449	2.34886	0.895653	0.826866
cg00694258	NA	NA	chr10	32038939	32038940	Non-CGI	FALSE	FALSE	TRUE	0.748012	-0.304517	0.625202	0.449496
cg00694315	259286	TAS2R40	chr7	142918234	142918235	Non-CGI	TRUE	FALSE	FALSE	1.98375	1.15396	0.790769	0.681101
cg00695799	340152	ZC3H12D	chr6	149803087	149803088	CGI	FALSE	TRUE	FALSE	0.31046	-0.353904	0.551748	0.441468
cg00697057	9963	SLC23A1	chr5	138713897	138713898	CGI	FALSE	TRUE	FALSE	2.819	1.93072	0.862811	0.771923
cg00697286	NA	NA	chr17	67557527	67557528	Non-CGI	FALSE	FALSE	TRUE	1.58006	-0.653903	0.743813	0.39876
cg00698413	79843	FAM124B	chr2	225266656	225266657	CGI	TRUE	FALSE	FALSE	1.3668	-0.08599	0.708293	0.487841
cg00698908	92293	TMEM132C	chr12	128750971	128750972	CGI-N-Shore	TRUE	FALSE	FALSE	-0.565179	-1.41832	0.407826	0.279738
cg00698916	NA	NA	chr6	13767628	13767629	CGI-N-Shore	FALSE	FALSE	TRUE	-0.934092	-1.77063	0.345318	0.228682
cg00699461	5152	PDE9A	chr21	44071900	44071901	CGI-N-Shore	TRUE	FALSE	FALSE	1.28316	-0.263625	0.697759	0.459744
cg00699919	23432	GPR161	chr1	168058592	168058593	Non-CGI	FALSE	TRUE	FALSE	4.24913	3.15184	0.949416	0.887307
cg00699947	100507266	STX18-AS1	chr4	4592560	4592561	Non-CGI	FALSE	TRUE	FALSE	2.16928	0.73958	0.808233	0.60482
cg00699986	30813	VSX1	chr20	25057444	25057445	CGI-N-Shore	FALSE	TRUE	FALSE	1.83684	1.12428	0.772293	0.672211
cg00700039	23347	SMCHD1	chr18	2659555	2659556	CGI-S-Shelf	FALSE	TRUE	FALSE	0.751135	-0.171068	0.624392	0.477522
cg00700241	7068	THRB	chr3	24161152	24161153	Non-CGI	FALSE	TRUE	FALSE	3.66649	2.68518	0.924867	0.858861
cg00700866	284654	RSPO1	chr1	38096105	38096106	CGI-N-Shelf	FALSE	TRUE	FALSE	0.815354	-0.343349	0.630193	0.448384
cg00701946	51130	ASB3	chr2	54087200	54087201	CGI	TRUE	FALSE	FALSE	-2.4404	-3.19566	0.16525	0.102527
cg00701946	10936	GPR75	chr2	54087200	54087201	CGI	TRUE	FALSE	FALSE	-2.4404	-3.19566	0.16525	0.102527
cg00702647	114827	FHAD1	chr1	15655764	15655765	CGI	FALSE	TRUE	FALSE	-1.29613	-2.35036	0.293141	0.164562
cg00704780	3069	HDLBP	chr2	242207920	242207921	CGI-N-Shelf	TRUE	TRUE	FALSE	1.21014	0.596808	0.69514	0.599355
cg00705808	6423	SFRP2	chr4	154711183	154711184	CGI	TRUE	FALSE	FALSE	2.39314	0.317375	0.815625	0.552922
cg00705992	3207	HOXA11	chr7	27226329	27226330	CGI-S-Shore	TRUE	TRUE	FALSE	4.76248	3.34629	0.963809	0.900445
cg00705992	221883	HOXA11-AS	chr7	27226329	27226330	CGI-S-Shore	TRUE	TRUE	FALSE	4.76248	3.34629	0.963809	0.900445
cg00706191	1009	CDH11	chr16	65017401	65017402	Non-CGI	TRUE	TRUE	FALSE	3.62454	2.88428	0.920746	0.864723
cg00706913	63976	PRDM16	chr1	3330139	3330140	CGI-S-Shore	FALSE	TRUE	FALSE	3.64618	2.68721	0.925262	0.859459
cg00708486	2643	GCH1	chr14	55355071	55355072	Non-CGI	FALSE	TRUE	FALSE	2.50738	1.71639	0.844842	0.756857
cg00708603	NA	NA	chr2	16463534	16463535	Non-CGI	FALSE	FALSE	TRUE	1.90946	1.23957	0.783211	0.696939
cg00709652	25890	ABI3BP	chr3	100673784	100673785	Non-CGI	FALSE	TRUE	FALSE	-1.05956	-2.64512	0.334185	0.141687
cg00709728	NA	NA	chr3	124778476	124778477	CGI-S-Shelf	TRUE	FALSE	FALSE	4.13694	3.22074	0.945777	0.899447
cg00710972	221044	UCMA	chr10	13275430	13275431	Non-CGI	FALSE	TRUE	FALSE	1.20416	0.134058	0.689046	0.527084
cg00711072	3215	HOXB5	chr17	46669489	46669490	CGI-N-Shore	TRUE	TRUE	FALSE	4.30592	2.17244	0.950027	0.796958
cg00711072	3213	HOXB3	chr17	46669489	46669490	CGI-N-Shore	TRUE	TRUE	FALSE	4.30592	2.17244	0.950027	0.796958
cg00711072	404266	HOXB-AS3	chr17	46669489	46669490	CGI-N-Shore	TRUE	TRUE	FALSE	4.30592	2.17244	0.950027	0.796958
cg00711274	NA	NA	chr2	75870921	75870922	CGI-N-Shelf	FALSE	FALSE	TRUE	2.71105	1.34618	0.862827	0.714435
cg00712762	26523	2001-08-01	chr1	36351470	36351471	CGI-S-Shore	FALSE	TRUE	FALSE	3.59071	2.24432	0.921748	0.820095
cg00712779	66008	TRAK2	chr2	202317602	202317603	CGI-S-Shore	TRUE	TRUE	FALSE	3.66562	2.62083	0.925476	0.854784
cg00712779	55437	STRADB	chr2	202317602	202317603	CGI-S-Shore	TRUE	TRUE	FALSE	3.66562	2.62083	0.925476	0.854784
cg00712841	2668	GDNF	chr5	37835548	37835549	CGI-S-Shore	TRUE	TRUE	FALSE	3.59072	2.61741	0.922295	0.846638
cg00713435	63976	PRDM16	chr1	3050958	3050959	CGI	FALSE	TRUE	FALSE	4.14189	3.20542	0.945788	0.897735
cg00713567	575	BAI1	chr8	143545949	143545950	CGI	TRUE	FALSE	FALSE	0.924868	-0.444701	0.646535	0.435936
cg00714672	79068	FTO	chr16	53749034	53749035	Non-CGI	FALSE	TRUE	FALSE	3.94751	2.24634	0.937836	0.811492
cg00714725	340665	CYP26C1	chr10	94825576	94825577	CGI	FALSE	TRUE	FALSE	-1.93697	-2.95192	0.224879	0.119252
cg00714810	NA	NA	chr10	46975531	46975532	CGI-S-Shelf	FALSE	FALSE	TRUE	2.42143	1.50629	0.841725	0.73163
cg00715197	5890	RAD51B	chr14	68604594	68604595	Non-CGI	FALSE	TRUE	FALSE	-1.16238	-2.13136	0.320096	0.193026
cg00715290	6497	SKI	chr1	2221807	2221808	CGI-N-Shore	FALSE	TRUE	FALSE	-0.44966	-1.43702	0.426616	0.275418
cg00715343	7083	TK1	chr17	76171845	76171846	CGI	FALSE	TRUE	FALSE	4.77002	3.69912	0.963918	0.921878
cg00715835	202915	TMEM184A	chr7	1584061	1584062	CGI-S-Shore	FALSE	TRUE	FALSE	3.57686	2.30722	0.920096	0.813924
cg00715999	63976	PRDM16	chr1	3083173	3083174	CGI	FALSE	TRUE	FALSE	3.96238	3.32764	0.939106	0.905683
cg00716579	574457	MIR181D	chr19	13984990	13984991	CGI	TRUE	FALSE	FALSE	2.22871	0.958791	0.821942	0.644479
cg00716579	406957	MIR181C	chr19	13984990	13984991	CGI	TRUE	FALSE	FALSE	2.22871	0.958791	0.821942	0.644479
cg00716848	NA	NA	chr2	3633875	3633876	CGI	FALSE	FALSE	TRUE	4.31614	3.44115	0.951871	0.906501
cg00717218	5732	PTGER2	chr14	52781800	52781801	CGI	TRUE	FALSE	FALSE	-0.981243	-2.18619	0.34022	0.184783
cg00717279	56975	FAM20C	chr7	208985	208986	CGI-S-Shore	FALSE	TRUE	FALSE	3.416	2.77033	0.911513	0.865252
cg00717678	83547	RILP	chr17	1554577	1554578	CGI-S-Shore	TRUE	TRUE	FALSE	3.11997	2.46572	0.890443	0.837839
cg00717678	10594	PRPF8	chr17	1554577	1554578	CGI-S-Shore	TRUE	TRUE	FALSE	3.11997	2.46572	0.890443	0.837839
cg00718142	9266	CYTH2	chr19	48980706	48980707	CGI-N-Shelf	FALSE	TRUE	FALSE	1.35015	0.443444	0.714457	0.575631
cg00718400	NA	NA	chr3	32509018	32509019	CGI	FALSE	FALSE	TRUE	4.07816	2.0124	0.942521	0.795301
cg00718414	29	ABR	chr17	938121	938122	CGI-S-Shelf	FALSE	TRUE	FALSE	2.9333	2.13935	0.881397	0.796965
cg00718883	1808	DPYSL2	chr8	26493115	26493116	Non-CGI	FALSE	TRUE	FALSE	4.21883	3.24235	0.947815	0.892994
cg00718923	4088	SMAD3	chr15	67486665	67486666	Non-CGI	FALSE	TRUE	FALSE	0.905031	-0.73021	0.649641	0.378206
cg00719899	140464	PISRT1	chr3	138952852	138952853	Non-CGI	TRUE	FALSE	FALSE	2.79182	1.81443	0.868782	0.77249
cg00720629	6899	TBX1	chr22	19752228	19752229	CGI-S-Shore	FALSE	TRUE	FALSE	3.16446	2.54392	0.892021	0.848484
cg00720829	89870	TRIM15	chr6	30131219	30131220	CGI-N-Shore	TRUE	FALSE	FALSE	0.890318	0.220056	0.648907	0.539945
cg00721819	7148	TNXB	chr6	32016520	32016521	CGI-S-Shore	FALSE	TRUE	FALSE	3.5234	1.75458	0.917842	0.755802
cg00722350	NA	NA	chr20	52277572	52277573	CGI-S-Shore	FALSE	FALSE	TRUE	1.7209	1.07322	0.763147	0.665125
cg00723041	NA	NA	chr22	42304331	42304332	CGI-N-Shore	FALSE	TRUE	FALSE	2.24556	1.05076	0.820564	0.666133
cg00723994	NA	NA	chr12	115105290	115105291	CGI	FALSE	FALSE	TRUE	4.49214	3.41822	0.955988	0.890918
cg00724015	NA	NA	chr2	119145086	119145087	Non-CGI	FALSE	FALSE	TRUE	2.3127	1.01577	0.823646	0.662361
cg00724315	7468	WHSC1	chr4	1941849	1941850	Non-CGI	FALSE	TRUE	FALSE	2.07264	0.944264	0.798515	0.641591
cg00725162	414351	LINC00229	chr22	45018185	45018186	CGI-S-Shore	FALSE	TRUE	FALSE	-0.237503	-0.917884	0.459737	0.355393
cg00726615	54847	SIDT1	chr3	113252640	113252641	CGI-S-Shore	FALSE	TRUE	FALSE	0.909769	-0.266736	0.641483	0.456325
cg00727673	NA	NA	chr3	53190763	53190764	CGI-S-Shore	FALSE	FALSE	TRUE	2.00593	0.472635	0.793866	0.579003
cg00728655	60412	EXOC4	chr7	133388430	133388431	Non-CGI	FALSE	TRUE	FALSE	0.714964	-0.830036	0.610947	0.365683
cg00729264	2822	GPLD1	chr6	24476663	24476664	Non-CGI	TRUE	TRUE	FALSE	3.27817	2.37493	0.90051	0.831714
cg00729275	147429	AQP4-AS1	chr18	24445134	24445135	CGI-S-Shore	TRUE	TRUE	FALSE	0.678721	-0.726997	0.612429	0.392933
cg00729275	361	AQP4	chr18	24445134	24445135	CGI-S-Shore	TRUE	TRUE	FALSE	0.678721	-0.726997	0.612429	0.392933
cg00729654	140688	C20orf112	chr20	31123895	31123896	CGI-N-Shore	TRUE	FALSE	FALSE	2.67246	1.91407	0.859409	0.775171
cg00729699	2039	DMTN	chr8	21918075	21918076	CGI-S-Shelf	FALSE	TRUE	FALSE	3.2926	2.51507	0.905108	0.844067
cg00730857	7469	NELFA	chr4	1994281	1994282	CGI	TRUE	TRUE	FALSE	3.29383	2.41908	0.898657	0.826133
cg00730887	NA	NA	chr4	160149604	160149605	Non-CGI	FALSE	FALSE	TRUE	1.41612	-0.223321	0.717508	0.465966
cg00731062	152118	C3orf79	chr3	153202275	153202276	Non-CGI	TRUE	FALSE	FALSE	0.941779	0.151954	0.652842	0.526234
cg00731232	NA	NA	chr9	18437917	18437918	CGI-N-Shore	FALSE	FALSE	TRUE	3.12299	0.693055	0.888826	0.601229
cg00731608	7127	TNFAIP2	chr14	103593907	103593908	CGI	TRUE	TRUE	FALSE	4.67101	3.27063	0.959539	0.898
cg00731691	388428	AATK-AS1	chr17	79145983	79145984	Non-CGI	FALSE	TRUE	FALSE	2.82981	1.0666	0.872331	0.662574
cg00732810	22821	RASA3	chr13	114875282	114875283	CGI	FALSE	TRUE	FALSE	1.97149	0.548405	0.793705	0.592082
cg00733493	23148	NACAD	chr7	45126655	45126656	CGI-N-Shore	FALSE	TRUE	FALSE	3.09835	1.44865	0.887781	0.719651
cg00734683	10039	PARP3	chr3	51982603	51982604	Non-CGI	FALSE	TRUE	FALSE	3.93665	3.01126	0.936864	0.87821
cg00735218	8632	DNAH17	chr17	76421569	76421570	CGI	FALSE	TRUE	FALSE	3.28686	2.20697	0.901523	0.809229
cg00735611	2886	GRB7	chr17	37895886	37895887	CGI-S-Shore	TRUE	TRUE	FALSE	0.597866	-0.272645	0.59965	0.4536
cg00737571	NA	NA	chr12	115135664	115135665	CGI	FALSE	FALSE	TRUE	0.236018	-0.823475	0.535782	0.368938
cg00737593	6513	SLC2A1	chr1	43422337	43422338	CGI-N-Shore	FALSE	TRUE	FALSE	3.29434	2.67429	0.904874	0.859265
cg00737840	63876	PKNOX2	chr11	125036420	125036421	CGI	FALSE	TRUE	FALSE	0.493292	-1.4368	0.582134	0.281225
cg00738345	404093	CUEDC1	chr17	55940530	55940531	CGI-S-Shore	FALSE	TRUE	FALSE	3.53292	1.10417	0.919071	0.678047
cg00738387	348995	NUP43	chr6	150066836	150066837	CGI-N-Shore	FALSE	TRUE	FALSE	0.257305	-0.405896	0.543379	0.432543
cg00738934	NA	NA	chr8	78996279	78996280	Non-CGI	FALSE	FALSE	TRUE	-1.44022	-2.10505	0.273929	0.191164
cg00739667	80790	CMIP	chr16	81731648	81731649	CGI	FALSE	TRUE	FALSE	2.32548	1.1505	0.826062	0.678499
cg00739778	23108	RAP1GAP2	chr17	2908023	2908024	CGI	FALSE	TRUE	FALSE	-1.45762	-2.25472	0.274347	0.181737
cg00741695	285768	LOC285768	chr6	961559	961560	Non-CGI	FALSE	TRUE	FALSE	2.50173	-0.304503	0.836386	0.448755
cg00743788	6300	MAPK12	chr22	50701157	50701158	CGI-S-Shore	TRUE	FALSE	FALSE	0.814059	-0.714951	0.635282	0.386382
cg00744433	1525	CXADR	chr21	18884067	18884068	CGI-N-Shore	TRUE	FALSE	FALSE	3.96232	3.32139	0.938597	0.900145
cg00744494	89932	PAPLN	chr14	73707721	73707722	CGI-S-Shore	FALSE	TRUE	FALSE	2.08376	1.35972	0.804926	0.709031
cg00747944	NA	NA	chr16	54972845	54972846	CGI	FALSE	FALSE	TRUE	4.5734	2.67467	0.959368	0.824743
cg00748718	7086	TKT	chr3	53283691	53283692	Non-CGI	FALSE	TRUE	FALSE	3.51734	2.87995	0.915788	0.875552
cg00748911	283033	LINC00841	chr10	44450977	44450978	Non-CGI	FALSE	TRUE	FALSE	3.36811	2.69454	0.909955	0.85766
cg00749118	8379	MAD1L1	chr7	1938791	1938792	CGI	FALSE	TRUE	FALSE	3.24765	0.772123	0.896098	0.622182
cg00749672	441204	LOC441204	chr7	26437192	26437193	CGI-N-Shore	TRUE	FALSE	FALSE	0.457441	-0.868739	0.575986	0.356814
cg00750555	NA	NA	chr16	22204290	22204291	CGI-S-Shore	FALSE	FALSE	TRUE	0.621921	-0.709573	0.588938	0.380052
cg00750630	NA	NA	chr14	51854261	51854262	Non-CGI	FALSE	FALSE	TRUE	3.94367	2.15893	0.932483	0.769727
cg00751072	170463	SSBP4	chr19	18529121	18529122	CGI	TRUE	FALSE	FALSE	1.37166	-0.591361	0.712814	0.402693
cg00753138	3800	KIF5C	chr2	149679934	149679935	Non-CGI	FALSE	TRUE	FALSE	3.06811	2.13356	0.88845	0.797419
cg00753399	55233	MOB1A	chr2	74404556	74404557	CGI-N-Shore	FALSE	TRUE	FALSE	2.5127	1.6662	0.845297	0.751037
cg00753658	79444	BIRC7	chr20	61867154	61867155	CGI-N-Shelf	TRUE	FALSE	FALSE	-0.574485	-1.60807	0.402457	0.25389
cg00753924	6256	RXRA	chr9	137298813	137298814	CGI-N-Shore	TRUE	TRUE	FALSE	-1.19446	-2.25222	0.317609	0.184061
cg00754253	117245	HRASLS5	chr11	63259187	63259188	CGI-S-Shore	TRUE	FALSE	FALSE	1.2618	-0.1496	0.700409	0.476099
cg00754426	57148	RALGAPB	chr20	37100437	37100438	CGI-N-Shore	TRUE	FALSE	FALSE	0.73835	0.0870192	0.619979	0.514037
cg00755588	389813	C9orf172	chr9	139737793	139737794	CGI-N-Shore	TRUE	FALSE	FALSE	-0.80246	-1.50471	0.367691	0.262261
cg00755950	NA	NA	chr2	69910490	69910491	Non-CGI	FALSE	FALSE	TRUE	-1.58914	-2.28527	0.257197	0.174441
cg00756032	4618	MYF6	chr12	81102123	81102124	CGI	FALSE	TRUE	FALSE	0.570423	-0.124392	0.593635	0.478996
cg00756451	6910	TBX5	chr12	114842700	114842701	CGI	TRUE	TRUE	FALSE	0.793937	-0.486295	0.62885	0.42098
cg00757033	100528030	POC1B-GALNT4	chr12	89920650	89920651	CGI-S-Shore	TRUE	FALSE	FALSE	0.979009	-0.0213898	0.654891	0.498638
cg00757033	282809	POC1B	chr12	89920650	89920651	CGI-S-Shore	TRUE	FALSE	FALSE	0.979009	-0.0213898	0.654891	0.498638
cg00757207	8742	TNFSF12	chr17	7456223	7456224	CGI-S-Shelf	FALSE	TRUE	FALSE	3.45567	2.57121	0.914253	0.842236
cg00757207	407977	TNFSF12-TNFSF13	chr17	7456223	7456224	CGI-S-Shelf	FALSE	TRUE	FALSE	3.45567	2.57121	0.914253	0.842236
cg00757414	8460	TPST1	chr7	65669728	65669729	CGI-N-Shore	TRUE	FALSE	FALSE	-1.01258	-1.7179	0.336379	0.236378
cg00758533	100131454	DBIL5P	chr17	656901	656902	CGI-S-Shore	TRUE	FALSE	FALSE	1.43218	0.552592	0.724235	0.590421
cg00758533	50628	GEMIN4	chr17	656901	656902	CGI-S-Shore	TRUE	FALSE	FALSE	1.43218	0.552592	0.724235	0.590421
cg00759254	84958	SYTL1	chr1	27679961	27679962	CGI-S-Shore	FALSE	TRUE	FALSE	1.99083	1.21009	0.791362	0.689801
cg00759301	23266	LPHN2	chr1	82165110	82165111	Non-CGI	TRUE	TRUE	FALSE	1.56628	-0.0325962	0.728818	0.495325
cg00759807	29123	ANKRD11	chr16	89390789	89390790	CGI	FALSE	TRUE	FALSE	1.65933	0.0617012	0.746397	0.513994
cg00759807	100287036	LOC100287036	chr16	89390789	89390790	CGI	FALSE	TRUE	FALSE	1.65933	0.0617012	0.746397	0.513994
cg00759987	NA	NA	chr1	27109220	27109221	Non-CGI	FALSE	FALSE	TRUE	3.09409	1.94067	0.889108	0.788815
cg00760938	NA	NA	chr2	217357159	217357160	Non-CGI	FALSE	FALSE	TRUE	2.39022	1.56447	0.831461	0.737044
cg00760950	NA	NA	chr13	38066983	38066984	Non-CGI	FALSE	FALSE	TRUE	-1.56521	-2.28052	0.257338	0.171611
cg00760992	57701	NCKAP5L	chr12	50223054	50223055	CGI-S-Shore	TRUE	TRUE	FALSE	0.921284	0.0949212	0.645832	0.515915
cg00760992	100286844	BCDIN3D-AS1	chr12	50223054	50223055	CGI-S-Shore	TRUE	TRUE	FALSE	0.921284	0.0949212	0.645832	0.515915
cg00761125	2004	ELK3	chr12	96590115	96590116	CGI-S-Shore	FALSE	TRUE	FALSE	1.76813	0.0886985	0.768148	0.515782
cg00761126	NA	NA	chr16	3195994	3195995	CGI-S-Shelf	TRUE	TRUE	FALSE	2.19129	1.53061	0.816357	0.73744
cg00762397	5549	PRELP	chr1	203454010	203454011	CGI-N-Shore	FALSE	TRUE	FALSE	1.37258	0.576172	0.715592	0.596525
cg00762678	863	CBFA2T3	chr16	89003235	89003236	CGI	FALSE	TRUE	FALSE	-0.0444477	-1.54379	0.494413	0.263336
cg00762705	51232	CRIM1	chr2	36601890	36601891	Non-CGI	FALSE	TRUE	FALSE	3.45146	2.42497	0.914783	0.831041
cg00764307	51676	ASB2	chr14	94408121	94408122	CGI-S-Shore	TRUE	TRUE	FALSE	0.492354	-0.473798	0.578242	0.420851
cg00764652	4600	MX2	chr21	42733397	42733398	Non-CGI	TRUE	FALSE	FALSE	3.55596	2.76309	0.914877	0.854181
cg00764668	3780	KCNN1	chr19	18108895	18108896	CGI-N-Shore	FALSE	TRUE	FALSE	2.74913	1.69803	0.864436	0.751682
cg00764796	100134368	LOC100134368	chr16	433504	433505	CGI	TRUE	TRUE	FALSE	3.07126	2.19121	0.881834	0.803028
cg00764796	58986	TMEM8A	chr16	433504	433505	CGI	TRUE	TRUE	FALSE	3.07126	2.19121	0.881834	0.803028
cg00765737	1284	COL4A2	chr13	110993493	110993494	Non-CGI	FALSE	TRUE	FALSE	3.94627	1.47607	0.937068	0.713321
cg00766146	NA	NA	chr1	2248719	2248720	CGI-S-Shore	FALSE	FALSE	TRUE	3.70175	2.28077	0.924988	0.8113
cg00766220	NA	NA	chr5	72598865	72598866	CGI-S-Shore	FALSE	FALSE	TRUE	3.06453	1.7554	0.884685	0.74941
cg00766964	221178	SPATA13	chr13	24693844	24693845	Non-CGI	FALSE	TRUE	FALSE	2.12927	1.27294	0.800743	0.696297
cg00767058	113622	ADPRHL1	chr13	114103796	114103797	CGI-S-Shelf	TRUE	TRUE	FALSE	0.603511	-0.51682	0.599505	0.417096
cg00768487	91544	UBXN11	chr1	26611311	26611312	CGI-S-Shelf	FALSE	TRUE	FALSE	0.0681318	-1.6744	0.51065	0.242694
cg00768993	23314	SATB2	chr2	200335874	200335875	CGI	TRUE	TRUE	FALSE	-0.906351	-2.26928	0.354068	0.17448
cg00768993	150538	SATB2-AS1	chr2	200335874	200335875	CGI	TRUE	TRUE	FALSE	-0.906351	-2.26928	0.354068	0.17448
cg00770158	54756	IL17RD	chr3	57134628	57134629	CGI-S-Shelf	FALSE	TRUE	FALSE	-0.729998	-2.30099	0.386175	0.181276
cg00770372	NA	NA	chr8	37237473	37237474	Non-CGI	FALSE	FALSE	TRUE	-0.423617	-1.95849	0.430631	0.218172
cg00770471	201895	SMIM14	chr4	39637530	39637531	CGI-N-Shore	FALSE	TRUE	FALSE	3.66734	3.00832	0.925697	0.886929
cg00772091	9184	BUB3	chr10	124914911	124914912	CGI-S-Shore	FALSE	TRUE	FALSE	-0.497088	-1.3476	0.419011	0.287858
cg00772407	1848	DUSP6	chr12	89744471	89744472	CGI	FALSE	TRUE	FALSE	1.62282	0.469739	0.745199	0.578677
cg00772959	NA	NA	chr1	9532871	9532872	Non-CGI	FALSE	FALSE	TRUE	-0.281786	-2.15736	0.457643	0.188909
cg00773142	5336	PLCG2	chr16	81898406	81898407	Non-CGI	FALSE	TRUE	FALSE	1.721	-0.176278	0.75321	0.473635
cg00774005	285987	DLX6-AS1	chr7	96633726	96633727	CGI-S-Shore	TRUE	TRUE	FALSE	4.30044	1.77679	0.951194	0.742984
cg00774005	1750	DLX6	chr7	96633726	96633727	CGI-S-Shore	TRUE	TRUE	FALSE	4.30044	1.77679	0.951194	0.742984
cg00774867	63976	PRDM16	chr1	3120245	3120246	CGI	FALSE	TRUE	FALSE	3.11551	2.01691	0.894695	0.787254
cg00775863	1496	CTNNA2	chr2	80229409	80229410	Non-CGI	FALSE	TRUE	FALSE	0.67322	-0.45398	0.609338	0.429253
cg00776405	7038	TG	chr8	133967862	133967863	Non-CGI	FALSE	TRUE	FALSE	2.57718	1.37834	0.845821	0.707897
cg00777198	9119	KRT75	chr12	52828273	52828274	Non-CGI	TRUE	FALSE	FALSE	0.941949	-0.27483	0.650676	0.459081
cg00777315	1638	DCT	chr13	95133339	95133340	Non-CGI	TRUE	FALSE	FALSE	0.654666	-0.794007	0.606796	0.369602
cg00777546	NA	NA	chr6	230932	230933	Non-CGI	FALSE	FALSE	TRUE	2.28576	1.45544	0.82026	0.716839
cg00779216	1293	COL6A3	chr2	238280726	238280727	CGI	FALSE	TRUE	FALSE	2.0097	0.202893	0.790835	0.531844
cg00779638	23287	AGTPBP1	chr9	88355164	88355165	CGI-N-Shore	FALSE	TRUE	FALSE	3.36348	2.63336	0.907651	0.855061
cg00779797	824	CAPN2	chr1	223934864	223934865	CGI-N-Shore	FALSE	TRUE	FALSE	3.2557	2.14153	0.899973	0.792429
cg00780456	55529	TMEM55A	chr8	92046216	92046217	Non-CGI	FALSE	TRUE	FALSE	2.80127	1.79157	0.868853	0.763536
cg00780810	NA	NA	chr15	70780653	70780654	Non-CGI	FALSE	FALSE	TRUE	-1.98922	-2.74334	0.204995	0.131151
cg00781208	57522	SRGAP1	chr12	64433590	64433591	Non-CGI	FALSE	TRUE	FALSE	1.35534	-0.257455	0.717071	0.457199
cg00781795	23327	NEDD4L	chr18	55815677	55815678	Non-CGI	TRUE	TRUE	FALSE	1.49017	0.343408	0.733942	0.553964
cg00782188	NA	NA	chr16	85555434	85555435	CGI-S-Shelf	FALSE	FALSE	TRUE	4.1797	2.91967	0.947083	0.869804
cg00782645	100130015	URAHP	chr16	90115048	90115049	CGI-S-Shore	TRUE	FALSE	FALSE	0.424289	-0.228876	0.57175	0.461216
cg00782843	2185	PTK2B	chr8	27307764	27307765	Non-CGI	TRUE	TRUE	FALSE	2.19865	1.52953	0.817349	0.733034
cg00783409	9639	ARHGEF10	chr8	1789288	1789289	CGI	FALSE	TRUE	FALSE	4.11485	3.3334	0.943652	0.903758
cg00783706	23144	ZC3H3	chr8	144601883	144601884	CGI-S-Shelf	FALSE	TRUE	FALSE	4.45359	3.82493	0.955787	0.929992
cg00783712	1131	CHRM3	chr1	239974513	239974514	Non-CGI	FALSE	TRUE	FALSE	3.24257	1.24717	0.893487	0.68398
cg00784161	79083	MLPH	chr2	238406432	238406433	CGI-N-Shore	FALSE	TRUE	FALSE	2.76623	1.85886	0.860224	0.77193
cg00784759	64446	DNAI2	chr17	72269945	72269946	CGI-N-Shore	TRUE	FALSE	FALSE	3.29662	2.419	0.904485	0.824533
cg00785106	89970	RSPRY1	chr16	57227089	57227090	Non-CGI	FALSE	TRUE	FALSE	0.597869	-0.533053	0.594524	0.41279
cg00785192	NA	NA	chr1	22739888	22739889	Non-CGI	FALSE	FALSE	TRUE	4.08949	3.18864	0.942251	0.891895
cg00785482	NA	NA	chr1	208058986	208058987	Non-CGI	FALSE	FALSE	TRUE	4.0283	0.987943	0.940325	0.650681
cg00785980	90634	N4BP2L1	chr13	32984237	32984238	CGI	FALSE	TRUE	FALSE	1.16335	-0.468944	0.683599	0.425651
cg00786165	NA	NA	chr8	1183309	1183310	CGI-N-Shore	FALSE	FALSE	TRUE	-1.11231	-2.1373	0.326084	0.215219
cg00786685	7145	TNS1	chr2	218842585	218842586	CGI-N-Shore	FALSE	TRUE	FALSE	2.66713	1.67825	0.859584	0.757534
cg00787180	440193	CCDC88C	chr14	91751731	91751732	CGI-N-Shore	TRUE	TRUE	FALSE	3.22217	1.98584	0.899562	0.790839
cg00788156	10894	LYVE1	chr11	10590557	10590558	Non-CGI	TRUE	TRUE	FALSE	4.4107	2.881	0.954508	0.860724
cg00788156	100129827	MRVI1-AS1	chr11	10590557	10590558	Non-CGI	TRUE	TRUE	FALSE	4.4107	2.881	0.954508	0.860724
cg00788204	7410	VAV2	chr9	136758038	136758039	CGI-N-Shore	FALSE	TRUE	FALSE	3.44912	2.46202	0.909771	0.839515
cg00788660	339789	LINC00299	chr2	8424578	8424579	Non-CGI	FALSE	TRUE	FALSE	3.29179	2.51278	0.905668	0.8425
cg00788710	NA	NA	chr1	208649506	208649507	Non-CGI	FALSE	FALSE	TRUE	3.17157	2.09028	0.894594	0.802537
cg00790020	NA	NA	chr8	1765477	1765478	CGI	FALSE	FALSE	TRUE	2.41538	0.757714	0.830662	0.6111
cg00790126	NA	NA	chr2	203636957	203636958	CGI-N-Shelf	FALSE	FALSE	TRUE	1.14492	-0.524066	0.682913	0.417039
cg00790255	100131551	LINC00887	chr3	194032074	194032075	CGI-N-Shore	TRUE	FALSE	FALSE	1.24943	-0.131167	0.687182	0.487897
cg00790535	4790	NFKB1	chr4	103482058	103482059	Non-CGI	FALSE	TRUE	FALSE	3.28657	1.69605	0.899615	0.742522
cg00790672	63976	PRDM16	chr1	3324671	3324672	CGI-N-Shore	FALSE	TRUE	FALSE	3.18045	2.00644	0.897969	0.796063
cg00791321	9759	HDAC4	chr2	239999938	239999939	CGI	FALSE	TRUE	FALSE	3.07527	2.32127	0.890742	0.824035
cg00791764	65997	RASL11B	chr4	53727839	53727840	CGI	TRUE	FALSE	FALSE	0.890801	0.161845	0.646086	0.527639
cg00792251	824	CAPN2	chr1	223888905	223888906	Non-CGI	TRUE	FALSE	FALSE	-1.72012	-2.5839	0.241741	0.14461
cg00793719	NA	NA	chr14	95477946	95477947	CGI	FALSE	FALSE	TRUE	2.98949	2.15976	0.87792	0.796836
cg00793946	5581	PRKCE	chr2	46163986	46163987	Non-CGI	FALSE	TRUE	FALSE	1.65419	0.886711	0.744776	0.645236
cg00794400	55920	RCC2	chr1	17746510	17746511	CGI	FALSE	TRUE	FALSE	-1.08839	-1.75892	0.325117	0.23606
cg00794508	NA	NA	chr7	516733	516734	CGI-N-Shore	FALSE	FALSE	TRUE	3.39631	2.66495	0.91022	0.858301
cg00795812	5133	PDCD1	chr2	242802009	242802010	CGI-N-Shore	TRUE	FALSE	FALSE	-0.90539	-1.98951	0.359335	0.220314
cg00796821	375616	KCP	chr7	128551757	128551758	CGI-S-Shore	TRUE	FALSE	FALSE	-0.271972	-1.63632	0.456278	0.252174
cg00797104	NA	NA	chr6	32847605	32847606	CGI	FALSE	FALSE	TRUE	1.11003	0.337821	0.676721	0.557727
cg00797286	8816	DCAF5	chr14	69621625	69621626	CGI-S-Shore	TRUE	FALSE	FALSE	1.94612	0.713674	0.784503	0.616396
cg00797651	1604	CD55	chr1	207494336	207494337	CGI	TRUE	FALSE	FALSE	0.141997	-0.95795	0.520753	0.351314
cg00798146	3029	HAGH	chr16	1869043	1869044	CGI	FALSE	TRUE	FALSE	3.17699	2.45266	0.894224	0.830493
cg00799539	429	ASCL1	chr12	103353183	103353184	CGI-S-Shore	FALSE	TRUE	FALSE	0.0343979	-1.12471	0.50809	0.327456
cg00799658	126248	WDR88	chr19	33625468	33625469	CGI-N-Shore	FALSE	TRUE	FALSE	1.14415	0.322666	0.680181	0.552902
cg00799984	10397	NDRG1	chr8	134307105	134307106	CGI-N-Shore	FALSE	TRUE	FALSE	3.72502	1.1971	0.926568	0.679133
cg00800141	115	ADCY9	chr16	4014161	4014162	CGI	FALSE	TRUE	FALSE	3.90246	3.2854	0.936606	0.901307
cg00800353	NA	NA	chr12	53273449	53273450	CGI	FALSE	FALSE	TRUE	-1.1072	-1.92239	0.322417	0.227195
cg00800896	NA	NA	chr5	135331857	135331858	Non-CGI	FALSE	FALSE	TRUE	-0.450808	-1.81937	0.430969	0.225551
cg00801512	NA	NA	chr17	28996047	28996048	CGI	FALSE	FALSE	TRUE	-1.82728	-2.57617	0.223916	0.14622
cg00801571	2534	FYN	chr6	112033832	112033833	Non-CGI	FALSE	TRUE	FALSE	2.35266	1.50114	0.824152	0.721511
cg00802510	23072	HECW1	chr7	43601539	43601540	Non-CGI	FALSE	TRUE	FALSE	2.73066	2.09467	0.86544	0.802777
cg00803453	10290	SPEG	chr2	220349615	220349616	CGI	FALSE	TRUE	FALSE	0.913644	0.0227837	0.642726	0.507214
cg00804097	63976	PRDM16	chr1	3349982	3349983	CGI-N-Shore	FALSE	TRUE	FALSE	4.19821	3.31499	0.947745	0.903289
cg00804179	9922	IQSEC1	chr3	13083974	13083975	CGI-S-Shore	FALSE	TRUE	FALSE	3.36248	2.23832	0.905947	0.791744
cg00804392	399	RHOH	chr4	40198595	40198596	Non-CGI	TRUE	FALSE	FALSE	2.11207	0.837824	0.798459	0.636418
cg00805193	140700	SAMD10	chr20	62609362	62609363	CGI-N-Shore	FALSE	TRUE	FALSE	1.93715	0.464215	0.784243	0.577183
cg00805619	3632	INPP5A	chr10	134420623	134420624	CGI	TRUE	TRUE	FALSE	1.81306	-0.365785	0.770135	0.443054
cg00805867	5142	PDE4B	chr1	66798063	66798064	Non-CGI	TRUE	TRUE	FALSE	-0.0923452	-2.16315	0.485048	0.193837
cg00805880	8497	PPFIA4	chr1	203045044	203045045	CGI	FALSE	TRUE	FALSE	3.60821	1.34357	0.919998	0.703447
cg00806138	2301	FOXE3	chr1	47881404	47881405	CGI-N-Shore	TRUE	FALSE	FALSE	1.80098	1.13027	0.774194	0.673485
cg00806214	9727	RAB11FIP3	chr16	521912	521913	CGI-N-Shore	FALSE	TRUE	FALSE	3.50978	2.72227	0.918502	0.855853
cg00806259	80004	ESRP2	chr16	68265587	68265588	CGI-N-Shelf	FALSE	TRUE	FALSE	2.56648	1.77636	0.846164	0.764757
cg00806319	65268	WNK2	chr9	96068666	96068667	CGI-N-Shore	FALSE	TRUE	FALSE	1.99266	0.882824	0.79226	0.642481
cg00806454	NA	NA	chr10	44185289	44185290	CGI	FALSE	FALSE	TRUE	-1.90599	-2.61916	0.214338	0.142869
cg00806481	63976	PRDM16	chr1	2996650	2996651	CGI	FALSE	TRUE	FALSE	4.35717	3.63015	0.953118	0.922006
cg00806634	1501	CTNND2	chr5	11383489	11383490	CGI-N-Shore	FALSE	TRUE	FALSE	3.37003	2.68445	0.908176	0.858004
cg00806644	NA	NA	chr10	126889815	126889816	Non-CGI	FALSE	FALSE	TRUE	3.23201	2.31465	0.898273	0.826055
cg00807197	92293	TMEM132C	chr12	128822865	128822866	Non-CGI	FALSE	TRUE	FALSE	0.859721	-1.22872	0.639289	0.315287
cg00807389	64772	ENGASE	chr17	77076614	77076615	CGI	FALSE	TRUE	FALSE	2.8257	1.80332	0.867685	0.764838
cg00807586	9940	DLEC1	chr3	38080790	38080791	CGI	TRUE	FALSE	FALSE	-1.10452	-2.03562	0.325392	0.204088
cg00807684	27303	RBMS3	chr3	29967204	29967205	Non-CGI	FALSE	TRUE	FALSE	3.32659	0.735529	0.902949	0.602167
cg00808086	NA	NA	chr16	73098934	73098935	CGI	FALSE	FALSE	TRUE	3.71645	1.87066	0.916721	0.764993
cg00808403	100129354	NRADDP	chr3	47052636	47052637	CGI-S-Shore	TRUE	FALSE	FALSE	3.58572	2.85898	0.918884	0.868363
cg00808555	390790	ARL5C	chr17	37323734	37323735	CGI-S-Shore	TRUE	FALSE	FALSE	-0.276591	-1.18613	0.453059	0.318116
cg00808563	NA	NA	chr5	5493320	5493321	CGI-N-Shore	FALSE	FALSE	TRUE	2.73536	1.61211	0.854489	0.744498
cg00809267	23327	NEDD4L	chr18	55816433	55816434	Non-CGI	TRUE	TRUE	FALSE	2.91957	2.21554	0.881278	0.8189
cg00809399	55657	ZNF692	chr1	249153756	249153757	CGI-S-Shore	TRUE	FALSE	FALSE	0.945644	-0.174621	0.646875	0.472546
cg00809863	23254	KAZN	chr1	15251881	15251882	CGI-S-Shore	FALSE	TRUE	FALSE	-0.926374	-1.81923	0.353297	0.234257
cg00810971	NA	NA	chr2	65085764	65085765	CGI-N-Shore	FALSE	TRUE	FALSE	0.34134	-0.907776	0.55738	0.370702
cg00812236	84231	TRAF7	chr16	2210434	2210435	CGI-N-Shelf	FALSE	TRUE	FALSE	1.4207	0.230331	0.72504	0.538465
cg00812578	55937	APOM	chr6	31625701	31625702	CGI-N-Shelf	FALSE	TRUE	FALSE	1.14449	0.0841881	0.6808	0.514763
cg00812761	152579	SCFD2	chr4	53799391	53799392	Non-CGI	FALSE	TRUE	FALSE	3.15867	0.946352	0.897478	0.641814
cg00812799	53342	IL17D	chr13	21295612	21295613	CGI	FALSE	TRUE	FALSE	3.40457	1.99716	0.910178	0.786901
cg00813378	339453	TMEM240	chr1	1475209	1475210	CGI	FALSE	TRUE	FALSE	-0.844434	-2.3915	0.365585	0.160791
cg00814909	1487	CTBP1	chr4	1225599	1225600	CGI	FALSE	TRUE	FALSE	1.85338	0.0430472	0.772869	0.507527
cg00814985	22821	RASA3	chr13	114801132	114801133	CGI	TRUE	TRUE	FALSE	2.12259	0.20834	0.796158	0.530817
cg00815177	57185	NIPAL3	chr1	24791193	24791194	Non-CGI	FALSE	TRUE	FALSE	2.07723	0.820487	0.788214	0.627545
cg00815325	9361	LONP1	chr19	5691899	5691900	CGI	FALSE	TRUE	FALSE	-0.324877	-1.55419	0.444717	0.262466
cg00816037	9780	PIEZO1	chr16	88812342	88812343	CGI-S-Shore	FALSE	TRUE	FALSE	3.27652	2.5395	0.902123	0.842878
cg00816039	407977	TNFSF12-TNFSF13	chr17	7461272	7461273	CGI-N-Shelf	TRUE	TRUE	FALSE	-0.161105	-1.27309	0.473018	0.295088
cg00816039	8741	TNFSF13	chr17	7461272	7461273	CGI-N-Shelf	TRUE	TRUE	FALSE	-0.161105	-1.27309	0.473018	0.295088
cg00816080	NA	NA	chr16	49518084	49518085	Non-CGI	FALSE	FALSE	TRUE	-0.339857	-1.79386	0.449648	0.245495
cg00816240	NA	NA	chr2	232477075	232477076	CGI-N-Shore	FALSE	FALSE	TRUE	0.809998	-1.68357	0.633487	0.244311
cg00817377	2006	ELN	chr7	73441057	73441058	CGI-N-Shore	TRUE	FALSE	FALSE	-0.225269	-1.89628	0.461742	0.214614
cg00818899	NA	NA	chr14	23291485	23291486	CGI	FALSE	FALSE	TRUE	3.19685	2.13762	0.89796	0.807806
cg00819141	NA	NA	chr7	1657422	1657423	CGI-N-Shore	FALSE	FALSE	TRUE	1.40403	-0.148652	0.718925	0.475884
cg00819310	81839	VANGL1	chr1	116193783	116193784	Non-CGI	FALSE	TRUE	FALSE	4.25471	3.17127	0.948195	0.884804
cg00819818	5914	RARA	chr17	38512762	38512763	CGI-S-Shore	FALSE	TRUE	FALSE	1.82972	0.651667	0.760615	0.609565
cg00820922	NA	NA	chr21	46973177	46973178	CGI-S-Shore	FALSE	FALSE	TRUE	2.96266	2.30534	0.882237	0.822317
cg00821413	1778	DYNC1H1	chr14	102508902	102508903	CGI-N-Shore	FALSE	TRUE	FALSE	2.66396	1.89606	0.856481	0.781664
cg00821483	NA	NA	chr17	55320776	55320777	Non-CGI	FALSE	FALSE	TRUE	-1.56419	-2.68065	0.257819	0.138175
cg00821731	80326	WNT10A	chr2	219744626	219744627	CGI-N-Shore	TRUE	FALSE	FALSE	1.4194	0.661119	0.722503	0.608872
cg00822797	NA	NA	chr12	52558844	52558845	Non-CGI	FALSE	FALSE	TRUE	3.60327	2.75349	0.922505	0.86858
cg00822840	1745	DLX1	chr2	172951828	172951829	CGI	FALSE	TRUE	FALSE	1.30459	-0.517804	0.704683	0.41733
cg00823843	339529	LOC339529	chr1	244094885	244094886	CGI	FALSE	TRUE	FALSE	0.25687	-0.694035	0.543995	0.387393
cg00824379	NA	NA	chr4	56812321	56812322	CGI-N-Shelf	FALSE	FALSE	TRUE	3.65221	2.67315	0.923594	0.856879
cg00825734	6339	SCNN1D	chr1	1217511	1217512	CGI-N-Shelf	TRUE	TRUE	FALSE	1.24482	0.498296	0.698049	0.58444
cg00827176	10361	NPM2	chr8	21885702	21885703	CGI-S-Shelf	FALSE	TRUE	FALSE	0.669292	-0.533488	0.611021	0.421676
cg00827382	344148	NCKAP5	chr2	134180028	134180029	Non-CGI	TRUE	TRUE	FALSE	3.42482	2.51494	0.91266	0.842742
cg00827893	23047	PDS5B	chr13	33162946	33162947	CGI-S-Shore	FALSE	TRUE	FALSE	0.148135	-0.777657	0.527532	0.383636
cg00828439	100132987	LINC00856	chr10	80193635	80193636	Non-CGI	FALSE	TRUE	FALSE	3.88942	1.50841	0.935194	0.723431
cg00829091	11132	CAPN10	chr2	241533694	241533695	CGI-S-Shelf	FALSE	TRUE	FALSE	3.33722	2.25508	0.903388	0.817597
cg00830252	11171	STRAP	chr12	16039824	16039825	CGI-S-Shelf	FALSE	TRUE	FALSE	3.17869	2.40061	0.898395	0.821974
cg00830283	100132406	NBPF10	chr1	145743676	145743677	Non-CGI	FALSE	TRUE	FALSE	3.4478	2.49037	0.911419	0.844949
cg00830283	5174	PDZK1	chr1	145743676	145743677	Non-CGI	FALSE	TRUE	FALSE	3.4478	2.49037	0.911419	0.844949
cg00830283	100288142	LOC100288142	chr1	145743676	145743677	Non-CGI	FALSE	TRUE	FALSE	3.4478	2.49037	0.911419	0.844949
cg00830419	NA	NA	chr2	20371971	20371972	Non-CGI	FALSE	FALSE	TRUE	3.98372	3.06549	0.940196	0.881611
cg00831247	1796	DOK1	chr2	74780268	74780269	CGI-N-Shore	TRUE	TRUE	FALSE	2.01138	-0.375181	0.794067	0.440124
cg00831247	84695	LOXL3	chr2	74780268	74780269	CGI-N-Shore	TRUE	TRUE	FALSE	2.01138	-0.375181	0.794067	0.440124
cg00831276	145270	PRIMA1	chr14	94251965	94251966	CGI-N-Shelf	FALSE	TRUE	FALSE	0.545821	-0.474515	0.588676	0.423001
cg00832567	NA	NA	chr19	1281113	1281114	CGI	FALSE	FALSE	TRUE	1.41631	0.101336	0.724276	0.517184
cg00832644	284680	C1orf111	chr1	162343785	162343786	Non-CGI	FALSE	TRUE	FALSE	2.247	0.777059	0.818705	0.627098
cg00832924	83992	CTTNBP2	chr7	117449060	117449061	Non-CGI	FALSE	TRUE	FALSE	-0.504025	-1.71316	0.419748	0.238096
cg00834223	116987	AGAP1	chr2	236944951	236944952	CGI	TRUE	TRUE	FALSE	2.75699	1.70847	0.866883	0.742281
cg00834536	115	ADCY9	chr16	4013537	4013538	CGI	FALSE	TRUE	FALSE	1.41496	0.779078	0.719562	0.628351
cg00834796	9832	JAKMIP2	chr5	147161924	147161925	Non-CGI	FALSE	TRUE	FALSE	-1.51035	-2.15057	0.267426	0.190038
cg00836007	115294	PCMTD1	chr8	52801982	52801983	Non-CGI	FALSE	TRUE	FALSE	1.6243	0.557928	0.742724	0.588801
cg00836272	50650	ARHGEF3	chr3	57021275	57021276	Non-CGI	FALSE	TRUE	FALSE	3.2971	2.63191	0.904802	0.843375
cg00836662	346606	MOGAT3	chr7	100844445	100844446	CGI-N-Shore	TRUE	FALSE	FALSE	-1.26361	-2.00965	0.299681	0.204988
cg00837398	155060	LOC155060	chr7	148958537	148958538	CGI-N-Shore	TRUE	FALSE	FALSE	-0.614283	-1.54601	0.399201	0.263348
cg00837398	100289678	ZNF783	chr7	148958537	148958538	CGI-N-Shore	TRUE	FALSE	FALSE	-0.614283	-1.54601	0.399201	0.263348
cg00838040	9914	ATP2C2	chr16	84446919	84446920	CGI-N-Shore	FALSE	TRUE	FALSE	2.6373	1.91781	0.855705	0.776677
cg00838081	NA	NA	chr16	86743955	86743956	CGI	FALSE	FALSE	TRUE	3.36725	2.64391	0.910815	0.859656
cg00838397	80201	HKDC1	chr10	70992225	70992226	Non-CGI	TRUE	TRUE	FALSE	-0.168371	-0.968486	0.471576	0.34914
cg00839129	NA	NA	chr10	131764887	131764888	CGI-S-Shore	FALSE	FALSE	TRUE	2.1671	1.02608	0.80118	0.651147
cg00839333	51435	SCARA3	chr8	27504520	27504521	Non-CGI	FALSE	TRUE	FALSE	1.95734	0.590621	0.781361	0.594833
cg00839584	3552	IL1A	chr2	113542091	113542092	Non-CGI	TRUE	FALSE	FALSE	0.586907	-0.446437	0.596021	0.428062
cg00839873	51676	ASB2	chr14	94421989	94421990	Non-CGI	TRUE	TRUE	FALSE	1.78822	0.6302	0.768869	0.601781
cg00840694	9172	MYOM2	chr8	1994574	1994575	CGI	FALSE	TRUE	FALSE	0.28861	-0.550832	0.549483	0.41323
cg00841001	993	CDC25A	chr3	48230393	48230394	CGI-S-Shore	TRUE	FALSE	FALSE	2.64028	2.00565	0.855853	0.793111
cg00842549	3213	HOXB3	chr17	46651920	46651921	CGI-S-Shore	TRUE	TRUE	FALSE	-0.220933	-1.0616	0.465141	0.339199
cg00842918	8522	GAS7	chr17	9940321	9940322	Non-CGI	TRUE	TRUE	FALSE	1.33637	0.0793594	0.708163	0.5136
cg00845204	100616458	MIR5095	chr20	55964273	55964274	CGI-N-Shore	FALSE	TRUE	FALSE	-2.82478	-3.58516	0.132913	0.077187
cg00847857	193629	LINC00189	chr21	30565636	30565637	Non-CGI	TRUE	FALSE	FALSE	0.925284	0.0194659	0.653437	0.503717
cg00848945	100652846	CACNA1C-AS1	chr12	2800919	2800920	CGI	TRUE	TRUE	FALSE	0.713397	-0.885986	0.603112	0.361559
cg00848945	775	CACNA1C	chr12	2800919	2800920	CGI	TRUE	TRUE	FALSE	0.713397	-0.885986	0.603112	0.361559
cg00849570	63976	PRDM16	chr1	3162104	3162105	CGI-S-Shore	FALSE	TRUE	FALSE	2.72267	1.80844	0.866378	0.769946
cg00849610	9496	TBX4	chr17	59529316	59529317	CGI	TRUE	FALSE	FALSE	0.196636	-1.11357	0.526671	0.321092
cg00849642	23603	CORO1C	chr12	109106495	109106496	Non-CGI	FALSE	TRUE	FALSE	2.5738	1.45777	0.851491	0.728954
cg00849853	5116	PCNT	chr21	47808878	47808879	CGI	FALSE	TRUE	FALSE	3.28322	2.66952	0.904822	0.860307
cg00850193	100038246	TLX1NB	chr10	102849349	102849350	Non-CGI	FALSE	TRUE	FALSE	2.26381	1.54868	0.822856	0.733662
cg00850747	79637	ARMC7	chr17	73112105	73112106	CGI-S-Shore	FALSE	TRUE	FALSE	3.89588	3.1074	0.936376	0.890052
cg00850996	375033	PEAR1	chr1	156874489	156874490	CGI-N-Shelf	TRUE	TRUE	FALSE	3.73401	2.95338	0.92861	0.878758
cg00851050	NA	NA	chr15	67326290	67326291	CGI-S-Shore	FALSE	FALSE	TRUE	-1.31664	-2.77195	0.295498	0.128414
cg00851627	NA	NA	chr1	2156394	2156395	CGI-N-Shore	FALSE	FALSE	TRUE	3.0104	2.12841	0.887574	0.808274
cg00852414	NA	NA	chr14	101543050	101543051	CGI	FALSE	FALSE	TRUE	4.061	3.13472	0.941811	0.891353
cg00852783	91544	UBXN11	chr1	26633632	26633633	CGI-S-Shore	TRUE	TRUE	FALSE	-0.361281	-1.15819	0.43895	0.318234
cg00852921	1917	EEF1A2	chr20	62120544	62120545	CGI	FALSE	TRUE	FALSE	0.284151	-0.334583	0.548552	0.447006
cg00853068	752	FMNL1	chr17	43298592	43298593	CGI-N-Shore	TRUE	TRUE	FALSE	0.903876	-0.634973	0.648995	0.394819
cg00853687	NA	NA	chr1	161948059	161948060	CGI-N-Shore	FALSE	FALSE	TRUE	3.60299	2.38908	0.922587	0.825882
cg00853979	56063	TMEM234	chr1	32681368	32681369	Non-CGI	FALSE	TRUE	FALSE	-1.33667	-1.94955	0.289823	0.208877
cg00853979	149069	DCDC2B	chr1	32681368	32681369	Non-CGI	FALSE	TRUE	FALSE	-1.33667	-1.94955	0.289823	0.208877
cg00854172	114818	KLHL29	chr2	23748104	23748105	CGI-S-Shore	FALSE	TRUE	FALSE	3.4518	2.80272	0.913947	0.868152
cg00855685	9037	SEMA5A	chr5	9543363	9543364	CGI-N-Shore	FALSE	TRUE	FALSE	3.68611	1.7975	0.927116	0.761388
cg00856273	23266	LPHN2	chr1	82165095	82165096	Non-CGI	TRUE	TRUE	FALSE	1.38689	0.153943	0.712158	0.526897
cg00857536	196740	VSTM4	chr10	50298306	50298307	Non-CGI	FALSE	TRUE	FALSE	0.668554	-0.15912	0.606554	0.473964
cg00858400	8140	SLC7A5	chr16	87904580	87904581	CGI-S-Shore	TRUE	FALSE	FALSE	3.19245	2.30528	0.898425	0.824179
cg00859314	24139	EML2	chr19	46147548	46147549	CGI-S-Shore	TRUE	TRUE	FALSE	3.67784	2.77898	0.925428	0.863503
cg00859622	128434	VSTM2L	chr20	36532668	36532669	CGI-S-Shore	FALSE	TRUE	FALSE	1.8937	1.2777	0.782606	0.701958
cg00859858	80149	ZC3H12A	chr1	37944257	37944258	CGI-S-Shelf	TRUE	TRUE	FALSE	0.852005	-0.646851	0.633775	0.397385
cg00860321	8379	MAD1L1	chr7	1889727	1889728	CGI	FALSE	TRUE	FALSE	3.19496	2.12409	0.898345	0.799436
cg00860712	730227	LOC730227	chr1	203274134	203274135	CGI-N-Shore	TRUE	FALSE	FALSE	0.723423	-0.686446	0.620967	0.397829
cg00860712	7832	BTG2	chr1	203274134	203274135	CGI-N-Shore	TRUE	FALSE	FALSE	0.723423	-0.686446	0.620967	0.397829
cg00861009	3237	HOXD11	chr2	176973688	176973689	CGI	FALSE	TRUE	FALSE	-0.541399	-1.54223	0.410467	0.261682
cg00861610	23284	LPHN3	chr4	62065095	62065096	CGI-N-Shore	TRUE	FALSE	FALSE	2.4456	1.17974	0.837847	0.687667
cg00862290	27094	KCNMB3	chr3	178984973	178984974	CGI-S-Shore	TRUE	FALSE	FALSE	3.07785	1.65655	0.891954	0.742334
cg00862588	3109	HLA-DMB	chr6	32909397	32909398	Non-CGI	TRUE	FALSE	FALSE	0.9214	-0.402943	0.650436	0.436383
cg00863378	583	BBS2	chr16	56549757	56549758	CGI-N-Shelf	FALSE	TRUE	FALSE	0.981882	-0.063533	0.65809	0.489586
cg00863397	653319	KIAA0895L	chr16	67215239	67215240	CGI-S-Shelf	TRUE	TRUE	FALSE	2.28305	0.817766	0.826695	0.633822
cg00863397	283849	EXOC3L1	chr16	67215239	67215240	CGI-S-Shelf	TRUE	TRUE	FALSE	2.28305	0.817766	0.826695	0.633822
cg00863716	8644	AKR1C3	chr10	5061094	5061095	Non-CGI	TRUE	TRUE	FALSE	0.805205	0.0408541	0.632846	0.507402
cg00863716	1646	AKR1C2	chr10	5061094	5061095	Non-CGI	TRUE	TRUE	FALSE	0.805205	0.0408541	0.632846	0.507402
cg00863893	7077	TIMP2	chr17	76876239	76876240	CGI	FALSE	TRUE	FALSE	-1.86178	-2.51445	0.223446	0.151733
cg00863913	NA	NA	chr8	144939685	144939686	CGI-N-Shore	FALSE	FALSE	TRUE	2.13955	0.863506	0.809695	0.637207
cg00864424	59342	SCPEP1	chr17	55054810	55054811	CGI-N-Shore	TRUE	FALSE	FALSE	1.05033	0.345318	0.670743	0.554729
cg00864474	9423	NTN1	chr17	9143838	9143839	CGI-S-Shore	FALSE	TRUE	FALSE	-1.06576	-1.92906	0.331036	0.220029
cg00864618	NA	NA	chr8	141518479	141518480	CGI-N-Shelf	FALSE	FALSE	TRUE	-0.981439	-2.03648	0.338648	0.197504
cg00864666	11069	RAPGEF4	chr2	173850250	173850251	Non-CGI	FALSE	TRUE	FALSE	2.86988	1.98586	0.869438	0.778119
cg00864691	NA	NA	chr16	84986179	84986180	CGI-N-Shore	FALSE	FALSE	TRUE	0.606648	-0.645899	0.602167	0.395386
cg00865054	114883	OSBPL9	chr1	52108201	52108202	Non-CGI	FALSE	TRUE	FALSE	3.57627	1.33777	0.920069	0.698465
cg00865390	169200	TMEM64	chr8	91713322	91713323	Non-CGI	FALSE	TRUE	FALSE	4.31734	3.04442	0.951241	0.884183
cg00866054	1302	COL11A2	chr6	33142284	33142285	Non-CGI	FALSE	TRUE	FALSE	2.01688	0.93265	0.798045	0.652331
cg00866186	283989	TSEN54	chr17	73518192	73518193	CGI	FALSE	TRUE	FALSE	3.88481	2.59141	0.935962	0.831704
cg00866541	NA	NA	chr16	85395661	85395662	CGI-S-Shore	FALSE	FALSE	TRUE	4.08863	3.45105	0.943831	0.912579
cg00866870	3912	LAMB1	chr7	107579250	107579251	Non-CGI	FALSE	TRUE	FALSE	0.192261	-1.38887	0.531612	0.293092
cg00866953	23254	KAZN	chr1	15417078	15417079	CGI-N-Shelf	FALSE	TRUE	FALSE	2.65524	1.37549	0.854362	0.714656
cg00867461	79816	TLE6	chr19	2980212	2980213	CGI-S-Shelf	FALSE	TRUE	FALSE	1.70688	0.379378	0.757859	0.565264
cg00867510	NA	NA	chr2	239930488	239930489	CGI-N-Shore	FALSE	FALSE	TRUE	2.77225	2.01239	0.863886	0.792768
cg00869330	219771	CCNY	chr10	35621144	35621145	CGI-N-Shelf	FALSE	TRUE	FALSE	1.81289	0.465975	0.768637	0.57889
cg00869417	10184	LHFPL2	chr5	77806312	77806313	CGI-S-Shore	FALSE	TRUE	FALSE	-2.14306	-3.0108	0.189	0.112162
cg00870242	203076	C8orf74	chr8	10530148	10530149	Non-CGI	TRUE	FALSE	FALSE	0.0174322	-0.597781	0.503073	0.401195
cg00870514	84440	RAB11FIP4	chr17	29717946	29717947	CGI	TRUE	FALSE	FALSE	1.16562	0.459865	0.685629	0.578667
cg00870837	NA	NA	chr16	1171361	1171362	CGI	FALSE	FALSE	TRUE	-0.0669594	-0.897785	0.488191	0.368761
cg00871787	147111	NOTUM	chr17	79920595	79920596	CGI	TRUE	FALSE	FALSE	2.55643	0.219703	0.849176	0.540256
cg00872865	NA	NA	chr3	112770545	112770546	CGI-S-Shore	FALSE	FALSE	TRUE	-0.59873	-1.53667	0.400605	0.25707
cg00873678	440193	CCDC88C	chr14	91770052	91770053	CGI-N-Shore	FALSE	TRUE	FALSE	2.11038	1.19505	0.803721	0.683933
cg00874073	NA	NA	chr17	73073329	73073330	CGI-N-Shore	FALSE	FALSE	TRUE	1.61519	0.513908	0.750233	0.585376
cg00874873	10347	ABCA7	chr19	1051160	1051161	CGI	FALSE	TRUE	FALSE	3.94228	3.05752	0.931559	0.876663
cg00874990	NA	NA	chr7	156409160	156409161	CGI	FALSE	FALSE	TRUE	-1.30737	-1.97308	0.293623	0.207532
cg00876267	NA	NA	chr9	139588516	139588517	CGI-S-Shore	FALSE	FALSE	TRUE	0.025926	-1.02015	0.509614	0.336192
cg00876273	3087	HHEX	chr10	94452311	94452312	CGI	FALSE	TRUE	FALSE	-0.0488943	-0.98164	0.491891	0.344214
cg00876681	9627	SNCAIP	chr5	121646014	121646015	CGI-N-Shore	TRUE	FALSE	FALSE	3.17046	0.91936	0.894363	0.630538
cg00879667	828	CAPS	chr19	5915215	5915216	CGI	FALSE	TRUE	FALSE	2.45576	1.42738	0.841595	0.722418
cg00879791	NA	NA	chr7	51544096	51544097	CGI-N-Shore	FALSE	FALSE	TRUE	1.53826	-0.234394	0.729195	0.462653
cg00879840	51741	WWOX	chr16	78323024	78323025	Non-CGI	FALSE	TRUE	FALSE	2.75287	1.2136	0.859268	0.672329
cg00880872	NA	NA	chr9	124887818	124887819	CGI-N-Shore	FALSE	FALSE	TRUE	1.61225	0.849287	0.750129	0.640583
cg00880984	25998	IBTK	chr6	82958011	82958012	CGI-S-Shore	TRUE	FALSE	FALSE	-0.59765	-1.9532	0.403188	0.207319
cg00881300	NA	NA	chr15	41219486	41219487	CGI-S-Shore	FALSE	FALSE	TRUE	2.74338	1.48971	0.868579	0.731797
cg00881372	64428	NARFL	chr16	780555	780556	CGI-S-Shore	FALSE	TRUE	FALSE	3.76702	2.88354	0.929006	0.864345
cg00883123	NA	NA	chr4	154373513	154373514	Non-CGI	FALSE	FALSE	TRUE	3.26375	1.89697	0.903337	0.779098
cg00883689	6711	SPTBN1	chr2	54802904	54802905	Non-CGI	FALSE	TRUE	FALSE	4.28283	2.12955	0.948766	0.790828
cg00883831	7855	FZD5	chr2	208636032	208636033	CGI	TRUE	FALSE	FALSE	1.22843	-0.794885	0.688788	0.378068
cg00884805	100289178	GNG12-AS1	chr1	68296607	68296608	CGI-N-Shore	TRUE	TRUE	FALSE	3.66459	1.29078	0.923339	0.690442
cg00884805	55970	GNG12	chr1	68296607	68296608	CGI-N-Shore	TRUE	TRUE	FALSE	3.66459	1.29078	0.923339	0.690442
cg00885918	85366	MYLK2	chr20	30406997	30406998	CGI-N-Shelf	TRUE	FALSE	FALSE	0.932368	-0.599751	0.653701	0.401734
cg00886598	6414	SEPP1	chr5	42812844	42812845	CGI-N-Shore	TRUE	TRUE	FALSE	3.64543	2.71998	0.923119	0.856062
cg00886695	23332	CLASP1	chr2	122270906	122270907	Non-CGI	FALSE	TRUE	FALSE	2.87212	1.93521	0.875983	0.789277
cg00886730	1788	DNMT3A	chr2	25470116	25470117	CGI-N-Shelf	FALSE	TRUE	FALSE	3.99432	3.32749	0.938973	0.904258
cg00886780	NA	NA	chr6	35149727	35149728	CGI-N-Shore	FALSE	FALSE	TRUE	-1.22443	-3.06765	0.314922	0.116324
cg00887848	285489	DOK7	chr4	3482507	3482508	CGI-N-Shelf	FALSE	TRUE	FALSE	-1.15527	-1.99337	0.312884	0.216514
cg00888336	124359	CDYL2	chr16	80654763	80654764	Non-CGI	FALSE	TRUE	FALSE	3.09679	2.42018	0.891668	0.83154
cg00888561	115825	WDFY2	chr13	52157910	52157911	CGI-N-Shore	TRUE	FALSE	FALSE	-1.79191	-2.47885	0.225066	0.152915
cg00889227	25778	DSTYK	chr1	205173544	205173545	Non-CGI	FALSE	TRUE	FALSE	3.86433	3.19374	0.935278	0.896207
cg00889356	9529	BAG5	chr14	104026955	104026956	CGI	TRUE	TRUE	FALSE	3.13291	2.38315	0.897001	0.831673
cg00889363	117583	PARD3B	chr2	206255841	206255842	Non-CGI	FALSE	TRUE	FALSE	0.569848	-0.543877	0.594552	0.412089
cg00889627	2563	GABRD	chr1	1959630	1959631	CGI	FALSE	TRUE	FALSE	3.26939	2.23792	0.899903	0.815251
cg00890049	NA	NA	chr6	115892863	115892864	Non-CGI	FALSE	FALSE	TRUE	2.33892	1.2526	0.825137	0.694629
cg00890054	80176	SPSB1	chr1	9405823	9405824	CGI-N-Shelf	FALSE	TRUE	FALSE	3.38084	2.73737	0.910012	0.867833
cg00891184	23095	KIF1B	chr1	10272185	10272186	CGI-S-Shore	FALSE	TRUE	FALSE	3.05999	1.56242	0.890169	0.723545
cg00892368	NA	NA	chr6	32847704	32847705	CGI	FALSE	FALSE	TRUE	2.2163	1.04287	0.81821	0.66531
cg00892742	NA	NA	chr3	195648562	195648563	CGI	FALSE	FALSE	TRUE	0.615776	-0.204045	0.60058	0.465699
cg00893522	NA	NA	chr6	125677906	125677907	Non-CGI	FALSE	FALSE	TRUE	2.45594	1.74312	0.836278	0.756148
cg00894252	9047	SH2D2A	chr1	156781025	156781026	CGI-N-Shelf	FALSE	TRUE	FALSE	-0.0896911	-1.43692	0.485427	0.277431
cg00894757	5010	CLDN11	chr3	170137240	170137241	CGI	TRUE	TRUE	FALSE	-0.765717	-1.51085	0.372709	0.26366
cg00895231	NA	NA	chr4	8346274	8346275	CGI-S-Shore	FALSE	FALSE	TRUE	1.91037	1.19329	0.784263	0.686976
cg00895528	79444	BIRC7	chr20	61867349	61867350	CGI-N-Shelf	TRUE	FALSE	FALSE	0.877079	0.13739	0.643407	0.523649
cg00896182	NA	NA	chr14	54686589	54686590	CGI-S-Shore	FALSE	FALSE	TRUE	3.53516	2.5458	0.916756	0.83729
cg00896347	NA	NA	chr12	39538940	39538941	CGI	FALSE	FALSE	TRUE	-1.08354	-1.70262	0.32552	0.238506
cg00897875	9020	MAP3K14	chr17	43392165	43392166	CGI-N-Shore	FALSE	TRUE	FALSE	-0.387798	-1.87994	0.436502	0.222191
[truncated: 47,682 more rows]
