# Supplementary material for: H3K4me1 marks DNA regions hypomethylated during aging in human stem and differentiated cells
Source: HighWire-hosted journal article supplement (doi:10.1101/gr.169011.113), 2014-09-30
Supplement: Supplemental_Table_4.xlsx [file Supplemental_Table_4.xlsx]

## Sheet: blood
Supplemental Table 4: List of CpG sites hypermethylated in blood during aging
Target ID	Chromosome	start	end	nearest.gene	nearest.gene.id	disttotss	hmm.cpgi	prom.reg	intra.reg	inter.reg
cg16867657	chr6	11044877	11044878	ELOVL2	54898	-252	CGI	TRUE	TRUE	FALSE
cg24724428	chr6	11044888	11044889	ELOVL2	54898	-263	CGI	TRUE	TRUE	FALSE
cg06639320	chr2	106015739	106015740	FHL2	2274	39489	CGI	TRUE	TRUE	FALSE
cg21572722	chr6	11044894	11044895	ELOVL2	54898	-269	CGI	TRUE	TRUE	FALSE
cg22454769	chr2	106015767	106015768	FHL2	2274	39461	CGI	TRUE	TRUE	FALSE
cg07547549	chr20	44658225	44658226	SLC12A5	57468	7895	CGI	FALSE	TRUE	FALSE
cg02650266	chr4	147558239	147558240	POU4F2	5458	-1804	CGI	TRUE	FALSE	FALSE
cg02383785	chr7	127808848	127808849	MIR129-1	406917	-39075	CGI-S-Shore	FALSE	FALSE	TRUE
cg23606718	chr2	131513927	131513928	AMER3	205147	849	CGI	TRUE	TRUE	FALSE
cg07553761	chr3	160167977	160167978	TRIM59	286827	-350	CGI	TRUE	FALSE	FALSE
cg17110586	chr19	36454623	36454624	LRFN3	79414	26600	CGI-S-Shelf	FALSE	FALSE	TRUE
cg16419235	chr8	57360613	57360614	PENK	5179	-1330	CGI	TRUE	TRUE	FALSE
cg08097417	chr7	130419133	130419134	KLF14	136259	-244	CGI-S-Shore	TRUE	FALSE	FALSE
cg03738025	chr6	105388694	105388695	LIN28B	389421	-16227	CGI	FALSE	FALSE	TRUE
cg04875128	chr15	31775895	31775896	KLF13	51621	156811	CGI	FALSE	TRUE	FALSE
cg03032497	chr14	61108227	61108228	SIX1	6495	7926	CGI-N-Shore	FALSE	FALSE	TRUE
cg17885226	chr6	105388731	105388732	LIN28B	389421	-16190	CGI	FALSE	FALSE	TRUE
cg05991454	chr4	147558435	147558436	POU4F2	5458	-1608	CGI	TRUE	FALSE	FALSE
cg27320127	chr2	47798396	47798397	KCNK12	56660	-925	CGI	TRUE	TRUE	FALSE
cg24079702	chr2	106015771	106015772	FHL2	2274	39457	CGI	TRUE	TRUE	FALSE
cg14361627	chr7	130419116	130419117	KLF14	136259	-227	CGI-S-Shore	TRUE	FALSE	FALSE
cg11084334	chr3	9594264	9594265	LHFPL4	375323	1220	CGI	FALSE	TRUE	FALSE
cg00439658	chr17	72848669	72848670	GRIN2C	2905	8295	CGI	FALSE	TRUE	FALSE
cg00059225	chr5	151304357	151304358	GLRA1	2741	38	CGI	TRUE	FALSE	FALSE
cg00481951	chr3	187387650	187387651	SST	6750	549	CGI	FALSE	TRUE	FALSE
cg06784991	chr1	53308768	53308769	ZYG11A	440590	584	CGI	FALSE	TRUE	FALSE
cg22736354	chr6	18122719	18122720	NHLRC1	378884	130	CGI	TRUE	FALSE	FALSE
cg14674720	chr2	219827930	219827931	CDK5R2	8941	3531	CGI	FALSE	FALSE	TRUE
cg19560758	chr1	8086721	8086722	ERRFI1	54206	-327	CGI	TRUE	FALSE	FALSE
cg23746497	chr6	105388668	105388669	LIN28B	389421	-16253	CGI	FALSE	FALSE	TRUE
cg03399905	chr15	79576060	79576061	LOC729911	729911	225	CGI	TRUE	TRUE	FALSE
cg00748589	chr12	11653486	11653487	LOC338817	338817	-47476	CGI	FALSE	FALSE	TRUE
cg12638731	chr13	36045281	36045282	MIR548F5	100302239	470099	CGI	TRUE	TRUE	FALSE
cg04940570	chr11	12696758	12696759	TEAD1	7003	788	CGI	FALSE	TRUE	FALSE
cg23500537	chr5	140419819	140419820	PCDHB1	29930	-11158	CGI-N-Shore	FALSE	FALSE	TRUE
cg18961681	chr7	32467657	32467658	LOC100130673	100130673	30447	CGI	FALSE	FALSE	TRUE
cg16717122	chr15	51973920	51973921	SCG3	29106	369	CGI	TRUE	FALSE	FALSE
cg13649056	chr9	136474626	136474627	DBH	1621	-26857	CGI	FALSE	FALSE	TRUE
cg26290632	chr8	91094847	91094848	CALB1	793	12838	CGI	TRUE	TRUE	FALSE
cg13954457	chr5	167956819	167956820	FBLL1	345630	236	CGI	TRUE	FALSE	FALSE
cg13246235	chr6	12749978	12749979	PHACTR1	221692	32940	CGI	FALSE	TRUE	FALSE
cg23479922	chr5	16179633	16179634	2011-03-01	441061	262	CGI	TRUE	FALSE	FALSE
cg11071401	chr17	48637194	48637195	CACNA1G	8913	-1253	CGI	TRUE	TRUE	FALSE
cg06493994	chr6	25652602	25652603	SCGN	10590	172	CGI	TRUE	FALSE	FALSE
cg03262554	chr9	136474735	136474736	DBH	1621	-26748	CGI	FALSE	FALSE	TRUE
cg14692377	chr17	28562685	28562686	SLC6A4	6532	267	CGI	TRUE	FALSE	FALSE
cg26354128	chr14	93897195	93897196	COX8C	341947	83657	CGI	FALSE	TRUE	FALSE
cg06570224	chr3	157812475	157812476	SHOX2	6474	11475	CGI	FALSE	FALSE	TRUE
cg04400972	chr1	117665053	117665054	TRIM45	80263	-641	CGI	TRUE	FALSE	FALSE
cg25124276	chr10	25464008	25464009	GPR158	57512	-280	CGI	TRUE	TRUE	FALSE
cg07060551	chr19	51198381	51198382	SHANK1	50944	21812	CGI	FALSE	TRUE	FALSE
cg11970349	chr4	8582287	8582288	CPZ	8532	69	CGI	TRUE	FALSE	FALSE
cg00745389	chr7	32467435	32467436	LOC100130673	100130673	30669	CGI	FALSE	FALSE	TRUE
cg24436906	chr2	242498081	242498082	BOK	666	-63	CGI	TRUE	TRUE	FALSE
cg14556683	chr19	15342982	15342983	EPHX3	79852	874	CGI	TRUE	TRUE	FALSE
cg25316339	chr5	79866379	79866380	ANKRD34B	340120	-74	CGI	TRUE	FALSE	FALSE
cg19671120	chr2	98962974	98962975	CNGA3	1261	355	CGI	TRUE	FALSE	FALSE
cg12534424	chr7	127992316	127992317	RBM28	55131	-8353	CGI	FALSE	TRUE	FALSE
cg13786089	chr19	3869086	3869087	ZFR2	23217	-58	CGI	TRUE	FALSE	FALSE
cg08160331	chr11	75140865	75140866	KLHL35	283212	807	CGI	TRUE	FALSE	FALSE
cg21296230	chr15	33010536	33010537	GREM1	26585	330	CGI	TRUE	TRUE	FALSE
cg15789607	chr19	4769690	4769691	MIR7-3HG	284424	572	CGI	TRUE	TRUE	FALSE
cg09017434	chr5	16179660	16179661	2011-03-01	441061	235	CGI	TRUE	FALSE	FALSE
cg16512661	chr5	2743620	2743621	IRX2	153572	8147	CGI	FALSE	FALSE	TRUE
cg16219603	chr8	57360586	57360587	PENK	5179	-1303	CGI	TRUE	TRUE	FALSE
cg03607117	chr3	53080440	53080441	SFMBT1	51460	-350	CGI	TRUE	FALSE	FALSE
cg20591472	chr1	110008990	110008991	SYPL2	284612	-108	CGI	TRUE	FALSE	FALSE
cg00292135	chr7	156433068	156433069	C7orf13	129790	278	CGI	TRUE	TRUE	FALSE
cg19392831	chr10	120355756	120355757	PRLHR	2834	-595	CGI	TRUE	FALSE	FALSE
cg07806886	chr3	120626899	120626900	STXBP5L	9515	-149	CGI	TRUE	FALSE	FALSE
cg25410668	chr1	28241577	28241578	RPA2	6118	-340	CGI-S-Shore	TRUE	FALSE	FALSE
cg18236477	chr13	26043066	26043067	ATP8A2	51761	96856	CGI	TRUE	TRUE	FALSE
cg01763090	chr15	31775406	31775407	KLF13	51621	156322	CGI	FALSE	TRUE	FALSE
cg07955995	chr7	130419159	130419160	KLF14	136259	-270	CGI-S-Shore	TRUE	FALSE	FALSE
cg18633600	chr12	1940452	1940453	LRTM2	654429	11018	CGI	FALSE	TRUE	FALSE
cg07502389	chr8	24771259	24771260	NEFM	4741	-13	CGI	TRUE	FALSE	FALSE
cg03545227	chr2	220173100	220173101	PTPRN	5798	1193	CGI	FALSE	TRUE	FALSE
cg12878812	chr12	119419696	119419697	SRRM4	84530	395	CGI	TRUE	FALSE	FALSE
cg07639287	chr22	17850911	17850912	CECR2	27443	10071	CGI	FALSE	TRUE	FALSE
cg22282410	chr7	158380884	158380885	PTPRN2	5799	-401	CGI	TRUE	FALSE	FALSE
cg02018902	chr15	79576149	79576150	LOC729911	729911	136	CGI	TRUE	TRUE	FALSE
cg13378934	chr19	47910580	47910581	MEIS3	56917	12203	CGI	FALSE	TRUE	FALSE
cg03350900	chr6	107955689	107955690	SOBP	55084	144371	CGI	FALSE	TRUE	FALSE
cg04061117	chr3	9594385	9594386	LHFPL4	375323	1099	CGI	TRUE	TRUE	FALSE
cg01908954	chr15	51973764	51973765	SCG3	29106	213	CGI	TRUE	FALSE	FALSE
cg12597389	chr7	8482235	8482236	NXPH1	30010	8649	CGI	FALSE	TRUE	FALSE
cg12757011	chr2	162281111	162281112	TBR1	10716	8490	CGI-S-Shore	FALSE	TRUE	FALSE
cg19702785	chr20	43727089	43727090	KCNS1	3787	2662	CGI	FALSE	TRUE	FALSE
cg04521004	chr3	157821262	157821263	SHOX2	6474	2688	CGI	FALSE	TRUE	FALSE
cg15480367	chr14	93389485	93389486	CHGA	1113	39	CGI	TRUE	FALSE	FALSE
cg10778288	chr12	113917994	113917995	LHX5	64211	-8116	CGI	FALSE	FALSE	TRUE
cg10906284	chr12	63544430	63544431	AVPR1A	552	2158	CGI	TRUE	FALSE	FALSE
cg24853724	chr7	28997403	28997404	LOC100506497	100506497	-22178	CGI	TRUE	TRUE	FALSE
cg16541931	chr10	25463757	25463758	GPR158	57512	-531	CGI	TRUE	TRUE	FALSE
cg01302656	chr14	29254853	29254854	C14orf23	387978	12942	CGI	TRUE	TRUE	FALSE
cg07927379	chr7	156433108	156433109	C7orf13	129790	238	CGI	TRUE	TRUE	FALSE
cg00094518	chr7	130418549	130418550	KLF14	136259	337	CGI	TRUE	FALSE	FALSE
cg03614193	chr18	55021542	55021543	ST8SIA3	51046	1820	CGI	FALSE	TRUE	FALSE
cg22158769	chr2	39187539	39187540	LOC375196	375196	-53	CGI	TRUE	TRUE	FALSE
cg25778262	chr12	69327449	69327450	CPM	1368	29569	CGI	TRUE	TRUE	FALSE
cg02287710	chr14	102027660	102027661	DIO3	1735	-26	CGI	TRUE	FALSE	FALSE
cg01153166	chr15	96874702	96874703	MIR1469	100302258	-1786	CGI	TRUE	TRUE	FALSE
cg17321954	chr3	120626881	120626882	STXBP5L	9515	-167	CGI	TRUE	FALSE	FALSE
cg24466241	chr1	53308908	53308909	ZYG11A	440590	724	CGI	FALSE	TRUE	FALSE
cg21911021	chr19	58095011	58095012	ZIK1	284307	-615	CGI	TRUE	FALSE	FALSE
cg15084543	chr1	79472408	79472409	ELTD1	64123	85	CGI	TRUE	FALSE	FALSE
cg19802138	chr13	112722719	112722720	SOX1	6656	805	CGI	TRUE	FALSE	FALSE
cg12451153	chr22	37099549	37099550	CACNG2	10369	-858	CGI	TRUE	FALSE	FALSE
cg01460436	chr20	44687454	44687455	NCOA5	57727	31124	CGI	FALSE	TRUE	FALSE
cg18902090	chr5	140306249	140306250	PCDHAC1	56135	-51	CGI	TRUE	TRUE	FALSE
cg20273670	chr17	21356245	21356246	KCNJ12	3768	76545	CGI	FALSE	FALSE	TRUE
cg00741624	chr14	93897389	93897390	COX8C	341947	83851	CGI	FALSE	TRUE	FALSE
cg09643544	chr19	9473696	9473697	ZNF177	7730	0	CGI	TRUE	TRUE	FALSE
cg15377283	chr8	55371369	55371370	SOX17	64321	873	CGI	FALSE	TRUE	FALSE
cg19891728	chr8	41754871	41754872	ANK1	286	-590	CGI	TRUE	FALSE	FALSE
cg26885220	chr1	65775570	65775571	DNAJC6	9829	55421	CGI	TRUE	TRUE	FALSE
cg22659676	chr5	139525919	139525920	IGIP	492311	20397	CGI	FALSE	FALSE	TRUE
cg21523251	chr4	8582110	8582111	CPZ	8532	-105	CGI-N-Shore	TRUE	FALSE	FALSE
cg17861230	chr19	18343901	18343902	PDE4C	5143	22326	CGI	TRUE	TRUE	FALSE
cg23026864	chr5	140306231	140306232	PCDHAC1	56135	-69	CGI	TRUE	TRUE	FALSE
cg07416237	chr13	100548078	100548079	ZIC5	85416	76098	CGI-S-Shore	FALSE	TRUE	FALSE
cg24488891	chr10	25464132	25464133	GPR158	57512	-156	CGI	TRUE	TRUE	FALSE
cg21801378	chr15	72612125	72612126	PARP6	56965	-48496	CGI	TRUE	TRUE	FALSE
cg01382110	chr18	4454189	4454190	DLGAP1	9229	1075	CGI	FALSE	TRUE	FALSE
cg08992872	chr8	91095058	91095059	CALB1	793	12627	CGI	TRUE	TRUE	FALSE
cg06942701	chr2	162280009	162280010	TBR1	10716	7388	CGI	FALSE	TRUE	FALSE
cg19792599	chr11	125774406	125774407	DDX25	29118	133	CGI	TRUE	FALSE	FALSE
cg00384539	chr8	70983567	70983568	PRDM14	63978	-4	CGI	TRUE	FALSE	FALSE
cg21091227	chr18	4454304	4454305	DLGAP1	9229	960	CGI	FALSE	TRUE	FALSE
cg22285878	chr7	130419173	130419174	KLF14	136259	-284	CGI-S-Shore	TRUE	FALSE	FALSE
cg08739433	chr1	113051925	113051926	WNT2B	7482	41884	CGI	TRUE	TRUE	FALSE
cg16477091	chr17	56833000	56833001	PPM1E	22843	-230	CGI	TRUE	FALSE	FALSE
cg20219381	chr8	101118083	101118084	RGS22	26166	259	CGI	TRUE	TRUE	FALSE
cg09232937	chr5	3595970	3595971	IRX1	79192	-196	CGI	TRUE	FALSE	FALSE
cg07149609	chr1	170630734	170630735	PRRX1	5396	-2577	CGI	FALSE	FALSE	TRUE
cg06602847	chr9	122131497	122131498	DBC1	1620	240	CGI	TRUE	FALSE	FALSE
cg17916490	chr2	11810173	11810174	NTSR2	23620	154	CGI	TRUE	FALSE	FALSE
cg21117668	chr2	242498349	242498350	BOK	666	202	CGI	TRUE	FALSE	FALSE
cg06335143	chr1	53308654	53308655	ZYG11A	440590	470	CGI	FALSE	TRUE	FALSE
cg07544187	chr19	19651235	19651236	CILP2	148113	2160	CGI	FALSE	TRUE	FALSE
cg01770755	chr15	41914122	41914123	MGA	23269	357	CGI	FALSE	TRUE	FALSE
cg15485728	chr9	79521359	79521360	PRUNE2	158471	-355	CGI	TRUE	FALSE	FALSE
cg01844642	chr3	51989764	51989765	GPR62	118442	433	CGI-N-Shore	TRUE	FALSE	FALSE
cg16800165	chr14	85996364	85996365	FLRT2	23768	-122	CGI	TRUE	FALSE	FALSE
cg17062829	chr4	147558089	147558090	POU4F2	5458	-1954	CGI	TRUE	FALSE	FALSE
cg19211800	chr6	114179013	114179014	MARCKS	4082	485	CGI	TRUE	FALSE	FALSE
cg10804656	chr10	22623460	22623461	SPAG6	9576	-10912	CGI	FALSE	FALSE	TRUE
cg12969644	chr9	85678242	85678243	RASEF	158158	-198	CGI	TRUE	FALSE	FALSE
cg12422450	chr14	93389891	93389892	CHGA	1113	445	CGI	FALSE	TRUE	FALSE
cg10189695	chr4	8582300	8582301	CPZ	8532	82	CGI	TRUE	FALSE	FALSE
cg16933181	chr18	24765485	24765486	CHST9	83539	-195	CGI	TRUE	TRUE	FALSE
cg15957055	chr3	62861055	62861056	CADPS	8618	7	CGI	TRUE	FALSE	FALSE
cg13080565	chr6	101846797	101846798	GRIK2	2898	127	CGI-N-Shore	TRUE	TRUE	FALSE
cg12877723	chr8	57358312	57358313	PENK	5179	968	CGI	TRUE	TRUE	FALSE
cg06707978	chr19	58095155	58095156	ZIK1	284307	-471	CGI	TRUE	FALSE	FALSE
cg22213242	chr11	66083573	66083574	CD248	57124	940	CGI	TRUE	FALSE	FALSE
cg12920180	chr14	31344444	31344445	COCH	1690	702	CGI	FALSE	TRUE	FALSE
cg02374745	chr17	6679564	6679565	FBXO39	162517	11	CGI	TRUE	FALSE	FALSE
cg18898125	chr8	24770381	24770382	NEFM	4741	-891	CGI-N-Shore	TRUE	FALSE	FALSE
cg12348202	chr7	158381023	158381024	PTPRN2	5799	-540	CGI	TRUE	FALSE	FALSE
cg27569300	chr15	99645065	99645066	SYNM	23336	-219	CGI	TRUE	FALSE	FALSE
cg15852516	chr8	17270812	17270813	MTMR7	9108	226	CGI	TRUE	FALSE	FALSE
cg20442599	chr6	108479500	108479501	NR2E1	7101	-7713	CGI	FALSE	FALSE	TRUE
cg15168727	chr5	72599228	72599229	TMEM174	134288	130204	CGI	FALSE	FALSE	TRUE
cg10151085	chr12	54654090	54654091	CBX5	23468	19823	Non-CGI	TRUE	TRUE	FALSE
cg13848598	chr10	115804578	115804579	ADRB1	153	771	CGI	TRUE	FALSE	FALSE
cg09515953	chr19	38747355	38747356	PPP1R14A	94274	-123	CGI	TRUE	FALSE	FALSE
cg08509172	chr19	19383838	19383839	HAPLN4	404037	234	CGI	FALSE	TRUE	FALSE
cg19711579	chr2	182545562	182545563	NEUROD1	4760	-169	CGI	TRUE	FALSE	FALSE
cg02699218	chr5	132150128	132150129	SOWAHA	134548	1094	CGI	TRUE	FALSE	FALSE
cg27050153	chr14	102030110	102030111	DIO3	1735	2421	CGI	FALSE	FALSE	TRUE
cg21784383	chr1	217311172	217311173	ESRRG	2104	-74	CGI	TRUE	FALSE	FALSE
cg11413039	chr11	125774447	125774448	DDX25	29118	174	CGI	TRUE	FALSE	FALSE
cg05121480	chr3	187387601	187387602	SST	6750	598	CGI	FALSE	TRUE	FALSE
cg05371578	chr3	147128157	147128158	ZIC1	7545	975	CGI	TRUE	FALSE	FALSE
cg13327545	chr10	22623548	22623549	SPAG6	9576	-10824	CGI	FALSE	FALSE	TRUE
cg18267374	chr8	24771273	24771274	NEFM	4741	0	CGI	TRUE	FALSE	FALSE
cg15979173	chr1	91182128	91182129	BARHL2	343472	664	CGI	TRUE	FALSE	FALSE
cg10827488	chr11	113953838	113953839	ZBTB16	7704	23406	CGI	FALSE	TRUE	FALSE
cg24051242	chr11	68096138	68096139	LRP5	4041	16029	CGI	FALSE	TRUE	FALSE
cg20426994	chr7	130418324	130418325	KLF14	136259	562	CGI	TRUE	FALSE	FALSE
cg16181396	chr3	147126206	147126207	ZIC1	7545	-973	CGI	TRUE	FALSE	FALSE
cg23368787	chr19	36049342	36049343	ATP4A	495	5216	CGI	TRUE	TRUE	FALSE
cg24366557	chr6	50787650	50787651	TFAP2B	7021	1210	CGI	FALSE	TRUE	FALSE
cg15728256	chr1	40254184	40254185	BMP8B	656	347	CGI	TRUE	FALSE	FALSE
cg09445939	chr10	54074079	54074080	DKK1	22943	37	CGI	TRUE	FALSE	FALSE
cg08044097	chr8	55371013	55371014	SOX17	64321	517	CGI	FALSE	TRUE	FALSE
cg19855470	chr22	40060836	40060837	CACNA1I	8911	94077	CGI	FALSE	TRUE	FALSE
cg26921969	chr5	92948217	92948218	MIR2277	100313887	8275	CGI-S-Shore	FALSE	FALSE	TRUE
cg05733135	chr11	27740876	27740877	BDNF	627	2727	CGI	FALSE	TRUE	FALSE
cg21927946	chr19	4769688	4769689	MIR7-3HG	284424	570	CGI	TRUE	TRUE	FALSE
cg04950301	chr6	12750392	12750393	PHACTR1	221692	33354	CGI	FALSE	TRUE	FALSE
cg18279094	chr1	63790044	63790045	FOXD3	27022	1313	CGI	TRUE	FALSE	FALSE
cg00390775	chr9	79521282	79521283	PRUNE2	158471	-278	CGI	TRUE	FALSE	FALSE
cg16038120	chr14	29235196	29235197	FOXG1	2290	-1089	CGI	TRUE	FALSE	FALSE
cg15341124	chr14	102027734	102027735	DIO3	1735	45	CGI	TRUE	FALSE	FALSE
cg22557662	chr19	38747374	38747375	PPP1R14A	94274	-142	CGI-S-Shore	TRUE	FALSE	FALSE
cg01294808	chr5	3599686	3599687	IRX1	79192	3517	CGI	FALSE	TRUE	FALSE
cg00020474	chr1	8214963	8214964	ERRFI1	54206	-128569	Non-CGI	FALSE	FALSE	TRUE
cg08231709	chr8	99438968	99438969	KCNS2	3788	-280	CGI	TRUE	FALSE	FALSE
cg00764612	chr1	150255213	150255214	C1orf51	148523	259	CGI	TRUE	TRUE	FALSE
cg03002352	chr2	17699688	17699689	RAD51AP2	729475	11991	CGI	TRUE	TRUE	FALSE
cg19505546	chr5	139017263	139017264	CXXC5	51523	-11036	CGI	FALSE	FALSE	TRUE
cg10239388	chr7	70596308	70596309	WBSCR17	64409	-1479	CGI	TRUE	FALSE	FALSE
cg05575054	chr10	115804968	115804969	ADRB1	153	1161	CGI	TRUE	FALSE	FALSE
cg06335867	chr7	8482325	8482326	NXPH1	30010	8739	CGI	FALSE	TRUE	FALSE
cg19885761	chr5	175223646	175223647	CPLX2	10814	35	CGI-N-Shore	TRUE	FALSE	FALSE
cg10151367	chr11	2847642	2847643	KCNQ1DN	55539	-43619	CGI	FALSE	TRUE	FALSE
cg05024939	chr4	113442251	113442252	NEUROG2	63973	-4922	CGI	FALSE	FALSE	TRUE
cg15448975	chr4	5894930	5894931	CRMP1	1400	-144	CGI	TRUE	FALSE	FALSE
cg07788092	chr19	9473691	9473692	ZNF177	7730	-3	CGI	TRUE	TRUE	FALSE
cg08566455	chr2	130971164	130971165	TUBA3E	112714	-15129	CGI	FALSE	FALSE	TRUE
cg02571816	chr19	38747378	38747379	PPP1R14A	94274	-146	CGI-S-Shore	TRUE	FALSE	FALSE
cg23077820	chr2	223154176	223154177	CCDC140	151278	-8688	CGI	FALSE	TRUE	FALSE
cg02447229	chr6	158957221	158957222	TMEM181	57583	-245	CGI-N-Shore	TRUE	FALSE	FALSE
cg26304237	chr1	65730384	65730385	DNAJC6	9829	10235	CGI-N-Shore	TRUE	TRUE	FALSE
cg17783401	chr8	54790518	54790519	RGS20	8601	26149	CGI	FALSE	TRUE	FALSE
cg12206199	chr2	39187543	39187544	LOC375196	375196	-57	CGI	TRUE	TRUE	FALSE
cg26856607	chr19	19325920	19325921	NCAN	1463	3137	CGI-S-Shelf	FALSE	TRUE	FALSE
cg09578475	chr19	9473688	9473689	ZNF177	7730	-6	CGI	TRUE	TRUE	FALSE
cg03705912	chr5	16179210	16179211	2011-03-01	441061	685	CGI	TRUE	FALSE	FALSE
cg07336350	chr16	54322127	54322128	IRX3	79191	-1748	CGI	TRUE	FALSE	FALSE
cg08541518	chr6	69942892	69942893	LMBRD1	55788	564155	CGI-N-Shore	FALSE	TRUE	FALSE
cg02479575	chr19	4769653	4769654	MIR7-3HG	284424	535	CGI	TRUE	TRUE	FALSE
cg00318320	chr2	242498098	242498099	BOK	666	-46	CGI	TRUE	TRUE	FALSE
cg06737494	chr3	172167644	172167645	GHSR	2693	-1397	CGI	TRUE	FALSE	FALSE
cg17694795	chr8	67874366	67874367	TCF24	100129654	457	CGI	FALSE	TRUE	FALSE
cg01287975	chr7	97361241	97361242	TAC1	6863	-28	CGI	TRUE	FALSE	FALSE
cg10266211	chr4	4860082	4860083	MSX1	4487	-1308	CGI	TRUE	FALSE	FALSE
cg19230755	chr7	65878503	65878504	LINC00174	285908	-13107	CGI	FALSE	FALSE	TRUE
cg06810647	chr16	1665094	1665095	CRAMP1L	57585	452	CGI	FALSE	TRUE	FALSE
cg26890189	chr19	47951302	47951303	SLC8A2	6543	24003	CGI	FALSE	TRUE	FALSE
cg26162616	chr6	72130539	72130540	LINC00472	79940	-90	CGI	TRUE	FALSE	FALSE
cg25044651	chr5	115298720	115298721	AQPEP	206338	568	CGI	TRUE	FALSE	FALSE
cg18382353	chr10	45495981	45495982	ZNF22	7570	-290	CGI-N-Shore	TRUE	FALSE	FALSE
cg08550421	chr5	140305947	140305948	PCDHAC1	56135	-353	CGI	TRUE	TRUE	FALSE
cg09887059	chr12	113916664	113916665	LHX5	64211	-6786	CGI	FALSE	FALSE	TRUE
cg07920503	chr13	25745406	25745407	AMER2	219287	897	CGI	TRUE	TRUE	FALSE
cg27137983	chr10	124909711	124909712	HMX2	3167	2072	CGI	FALSE	TRUE	FALSE
cg07254032	chr5	45695839	45695840	HCN1	348980	379	CGI	TRUE	FALSE	FALSE
cg27315556	chr3	173115771	173115772	NLGN1	22871	-471	CGI	TRUE	FALSE	FALSE
cg25649641	chr15	76635357	76635358	ISL2	64843	6209	CGI	FALSE	FALSE	TRUE
cg19554389	chr3	55521134	55521135	WNT5A	7474	195	CGI	TRUE	FALSE	FALSE
cg24783211	chr4	55093038	55093039	GSX2	170825	126789	CGI	FALSE	TRUE	FALSE
cg21800232	chr5	79866368	79866369	ANKRD34B	340120	-63	CGI	TRUE	FALSE	FALSE
cg10530883	chr5	3596207	3596208	IRX1	79192	38	CGI	TRUE	FALSE	FALSE
cg13488201	chr10	128077323	128077324	ADAM12	8038	-195	CGI	TRUE	FALSE	FALSE
cg04807594	chr3	148415747	148415748	AGTR1	185	88	CGI	TRUE	FALSE	FALSE
cg01537995	chr14	85996352	85996353	FLRT2	23768	-134	CGI	TRUE	FALSE	FALSE
cg02928699	chr11	88241946	88241947	CTSC	1075	-171004	CGI	FALSE	TRUE	FALSE
cg26161329	chr17	56832991	56832992	PPM1E	22843	-239	CGI	TRUE	FALSE	FALSE
cg24452260	chr4	158143538	158143539	GRIA2	2891	2242	CGI	FALSE	TRUE	FALSE
cg25427880	chr10	102322128	102322129	HIF1AN	55662	26486	CGI	FALSE	FALSE	TRUE
cg03422911	chr1	237205295	237205296	RYR2	6262	-405	CGI	TRUE	FALSE	FALSE
cg26330518	chr8	24770342	24770343	NEFM	4741	-930	CGI-N-Shore	TRUE	FALSE	FALSE
cg15124757	chr2	17699904	17699905	RAD51AP2	729475	11775	CGI	TRUE	TRUE	FALSE
cg13654588	chr10	120354081	120354082	PRLHR	2834	1077	CGI	TRUE	TRUE	FALSE
cg18064714	chr7	20824556	20824557	SP8	221833	1950	CGI	TRUE	TRUE	FALSE
cg19079194	chr2	213403321	213403322	ERBB4	2066	29	CGI-S-Shore	TRUE	FALSE	FALSE
cg07333191	chr4	13526769	13526770	LOC285547	285547	6270	CGI	FALSE	FALSE	TRUE
cg17280346	chr3	147126703	147126704	ZIC1	7545	-476	CGI	TRUE	FALSE	FALSE
cg21971621	chr11	65600773	65600774	SNX32	254122	-635	CGI-N-Shore	TRUE	FALSE	FALSE
cg22311615	chr16	30798776	30798777	ZNF629	23361	-252	CGI-S-Shore	TRUE	FALSE	FALSE
cg16015712	chr1	53308597	53308598	ZYG11A	440590	413	CGI	TRUE	FALSE	FALSE
cg04228468	chr3	164913627	164913628	SLITRK3	22865	840	CGI	TRUE	TRUE	FALSE
cg17737681	chr2	172952136	172952137	DLX1	1745	1927	CGI	FALSE	TRUE	FALSE
cg10056132	chr10	50887731	50887732	C10orf53	282966	46	CGI	TRUE	TRUE	FALSE
cg20956815	chr3	184320006	184320007	EPHB3	2049	40418	CGI-S-Shore	FALSE	FALSE	TRUE
cg05209584	chr5	127873283	127873284	FBN2	2201	631	CGI	TRUE	FALSE	FALSE
cg16361302	chr2	19561327	19561328	OSR1	130497	-2954	CGI	FALSE	FALSE	TRUE
cg18159860	chr5	72678420	72678421	BTF3	689	-115828	CGI-S-Shore	FALSE	FALSE	TRUE
cg05942128	chr2	176972020	176972021	HOXD11	3237	2769	CGI-S-Shore	TRUE	TRUE	FALSE
cg04894619	chr3	179754615	179754616	PEX5L	51555	-97	CGI	TRUE	FALSE	FALSE
cg05266781	chr16	54965492	54965493	IRX5	10265	380	CGI	TRUE	TRUE	FALSE
cg05138148	chr1	48449895	48449896	TRABD2B	388630	12665	CGI	FALSE	TRUE	FALSE
cg16582779	chr14	29237202	29237203	FOXG1	2290	914	CGI	TRUE	FALSE	FALSE
cg10806820	chr3	48699090	48699091	CELSR3	1951	10889	CGI	TRUE	TRUE	FALSE
cg09499629	chr7	130419136	130419137	KLF14	136259	-247	CGI-S-Shore	TRUE	FALSE	FALSE
cg05009601	chr7	121944500	121944501	FEZF1	389549	63	CGI	TRUE	TRUE	FALSE
cg13779907	chr1	38230073	38230074	EPHA10	284656	749	CGI	FALSE	TRUE	FALSE
cg09360770	chr16	86600326	86600327	FOXC2	2303	-529	CGI	TRUE	FALSE	FALSE
cg06942685	chr19	56879432	56879433	ZNF542	147947	-34	CGI	TRUE	TRUE	FALSE
cg19165390	chr18	56932082	56932083	RAX	30062	8541	CGI	FALSE	FALSE	TRUE
cg13473356	chr3	179754613	179754614	PEX5L	51555	-95	CGI	TRUE	FALSE	FALSE
cg21567504	chr15	28344477	28344478	OCA2	4948	-18	CGI	TRUE	FALSE	FALSE
cg10676084	chr15	27017560	27017561	GABRA5	2558	-94304	CGI	FALSE	TRUE	FALSE
cg08658787	chr12	113916646	113916647	LHX5	64211	-6768	CGI	FALSE	FALSE	TRUE
cg11220950	chr16	2042693	2042694	SYNGR3	9143	2746	CGI	FALSE	TRUE	FALSE
cg20445774	chr6	33400021	33400022	SYNGAP1	8831	12173	CGI-S-Shelf	FALSE	TRUE	FALSE
cg21553182	chr19	52956821	52956822	ZNF578	147660	-6	CGI	TRUE	FALSE	FALSE
cg12457773	chr6	24126497	24126498	NRSN1	140767	82	CGI	TRUE	FALSE	FALSE
cg24222995	chr7	28995786	28995787	LOC100506497	100506497	-23795	CGI	FALSE	TRUE	FALSE
cg01276475	chr6	72596176	72596177	RIMS1	22999	-472	CGI	TRUE	FALSE	FALSE
cg00503840	chr7	96650509	96650510	DLX5	1749	3632	CGI	FALSE	TRUE	FALSE
cg19351628	chr12	58246612	58246613	CTDSP2	10106	-5864	CGI	FALSE	FALSE	TRUE
cg01464052	chr1	150255137	150255138	C1orf51	148523	183	CGI	TRUE	TRUE	FALSE
cg11760593	chr14	38053599	38053600	FOXA1	3169	10888	CGI	FALSE	FALSE	TRUE
cg26307359	chr17	27332646	27332647	SEZ6	124925	810	CGI	FALSE	TRUE	FALSE
cg04467618	chr6	134210946	134210947	TCF21	6943	686	CGI	TRUE	FALSE	FALSE
cg20175390	chr2	119599459	119599460	EN1	2019	6298	CGI	FALSE	FALSE	TRUE
cg27392792	chr7	158380886	158380887	PTPRN2	5799	-403	CGI	TRUE	FALSE	FALSE
cg12089570	chr19	9473715	9473716	ZNF177	7730	18	CGI	TRUE	TRUE	FALSE
cg08874609	chr5	126626360	126626361	MEGF10	84466	-94	CGI	TRUE	FALSE	FALSE
cg20818778	chr1	235814145	235814146	GNG4	2786	-90	CGI-S-Shore	TRUE	FALSE	FALSE
cg02318784	chr15	27213174	27213175	GABRG3	2567	-3253	CGI	FALSE	FALSE	TRUE
cg26195356	chr5	2743601	2743602	IRX2	153572	8166	CGI	FALSE	FALSE	TRUE
cg10967350	chr3	2141304	2141305	CNTN4	152330	753	CGI	TRUE	TRUE	FALSE
cg25478614	chr3	187387866	187387867	SST	6750	333	CGI	FALSE	TRUE	FALSE
cg03555227	chr5	170289070	170289071	RANBP17	64901	173	CGI	FALSE	TRUE	FALSE
cg03509106	chr4	121992261	121992262	NDNF	79625	1410	CGI	FALSE	TRUE	FALSE
cg18322569	chr1	91182777	91182778	BARHL2	343472	15	CGI	TRUE	FALSE	FALSE
cg08445802	chr6	85482612	85482613	TBX18	9096	-8712	CGI	FALSE	FALSE	TRUE
cg01850269	chr6	100903227	100903228	SIM1	6492	9576	CGI	FALSE	TRUE	FALSE
cg05301866	chr2	162279964	162279965	TBR1	10716	7343	CGI	FALSE	TRUE	FALSE
cg20723355	chr17	6679597	6679598	FBXO39	162517	44	CGI	FALSE	TRUE	FALSE
cg18987410	chr11	124791197	124791198	HEPN1	641654	2050	CGI	FALSE	TRUE	FALSE
cg24035245	chr1	119535928	119535929	TBX15	6913	-3748	CGI	FALSE	FALSE	TRUE
cg19029181	chr3	147130536	147130537	ZIC1	7545	3354	CGI	FALSE	TRUE	FALSE
cg11480800	chr15	55881075	55881076	PYGO1	26108	-24	CGI	TRUE	FALSE	FALSE
cg01003961	chr7	20824706	20824707	SP8	221833	1800	CGI	TRUE	TRUE	FALSE
cg00441573	chr10	43428471	43428472	RET	5979	-144044	CGI	FALSE	FALSE	TRUE
cg19851909	chr11	94134827	94134828	GPR83	10888	-241	CGI	TRUE	FALSE	FALSE
cg25078444	chr14	29235193	29235194	FOXG1	2290	-1092	CGI	TRUE	FALSE	FALSE
cg03178798	chr18	10032699	10032700	VAPA	9218	118743	CGI	FALSE	FALSE	TRUE
cg22234080	chr22	29876942	29876943	NEFH	4744	760	CGI	TRUE	FALSE	FALSE
cg22059812	chr1	19992564	19992565	HTR6	3362	783	CGI	TRUE	FALSE	FALSE
cg05937737	chr3	170303540	170303541	SLC7A14	57709	321	CGI	FALSE	TRUE	FALSE
cg23805357	chr10	25464139	25464140	GPR158	57512	-149	CGI	TRUE	TRUE	FALSE
cg06782035	chr5	16179135	16179136	2011-03-01	441061	760	CGI	TRUE	TRUE	FALSE
cg04670857	chr2	79740208	79740209	MIR4264	100422888	136275	CGI	TRUE	TRUE	FALSE
cg12818557	chr8	89340139	89340140	MMP16	4325	-421	CGI	TRUE	FALSE	FALSE
cg05176991	chr18	24128116	24128117	KCTD1	284252	92190	CGI	TRUE	TRUE	FALSE
cg18070676	chr14	85997519	85997520	FLRT2	23768	1030	CGI	TRUE	TRUE	FALSE
cg14134497	chr18	32074251	32074252	DTNA	1837	996	CGI	FALSE	TRUE	FALSE
cg23331484	chr19	33718148	33718149	SLC7A10	56301	-1391	CGI	TRUE	FALSE	FALSE
cg01501551	chr14	74100860	74100861	DNAL1	83544	-10716	CGI	FALSE	FALSE	TRUE
cg26078977	chr5	59189467	59189468	PART1	25859	-594071	CGI	TRUE	TRUE	FALSE
cg15600488	chr8	17271119	17271120	MTMR7	9108	-78	CGI	TRUE	FALSE	FALSE
cg11574975	chr1	112058304	112058305	RAP1A	5906	-26749	CGI	FALSE	TRUE	FALSE
cg25351606	chr6	100917427	100917428	SIM1	6492	-4621	CGI	FALSE	FALSE	TRUE
cg16107285	chr15	99645031	99645032	SYNM	23336	-253	CGI	TRUE	FALSE	FALSE
cg05236677	chr8	99952217	99952218	STK3	6788	2654	CGI	FALSE	TRUE	FALSE
cg03129384	chr10	128994644	128994645	FAM196A	642938	-221	CGI	TRUE	TRUE	FALSE
cg10477621	chr7	19184950	19184951	FERD3L	222894	92	CGI	TRUE	TRUE	FALSE
cg13347071	chr2	210636748	210636749	UNC80	285175	30	CGI	TRUE	FALSE	FALSE
cg09105193	chr12	69327238	69327239	CPM	1368	29780	CGI	TRUE	TRUE	FALSE
cg00884093	chr22	46932648	46932649	CELSR1	9620	417	CGI	TRUE	FALSE	FALSE
cg19407095	chr13	112721778	112721779	SOX1	6656	-133	CGI	TRUE	FALSE	FALSE
cg08361126	chr10	15762091	15762092	ITGA8	8516	-320	CGI	TRUE	FALSE	FALSE
cg20584905	chr2	223163784	223163785	PAX3	5077	-68	CGI	TRUE	TRUE	FALSE
cg11700800	chr5	92906633	92906634	FLJ42709	441094	10368	CGI	TRUE	TRUE	FALSE
cg13974632	chr11	27740813	27740814	BDNF	627	2790	CGI	FALSE	TRUE	FALSE
cg27106513	chr8	54790372	54790373	RGS20	8601	26003	CGI	FALSE	TRUE	FALSE
cg18257814	chr2	55646430	55646431	CCDC88A	55704	625	CGI	TRUE	FALSE	FALSE
cg00495775	chr2	176972041	176972042	HOXD11	3237	2790	CGI-S-Shore	TRUE	TRUE	FALSE
cg12852499	chr13	79170959	79170960	POU4F1	5457	6734	CGI-S-Shore	FALSE	TRUE	FALSE
cg17802949	chr22	40060891	40060892	CACNA1I	8911	94132	CGI	FALSE	TRUE	FALSE
cg14621053	chr10	128077315	128077316	ADAM12	8038	-187	CGI	TRUE	FALSE	FALSE
cg04609576	chr5	126626362	126626363	MEGF10	84466	-92	CGI	TRUE	FALSE	FALSE
cg01410472	chr8	75896975	75896976	CRISPLD1	83690	266	CGI	TRUE	FALSE	FALSE
cg27213509	chr2	176947228	176947229	EVX2	344191	1460	CGI	FALSE	TRUE	FALSE
cg12915892	chr2	134024093	134024094	NCKAP5	344148	301936	CGI	FALSE	TRUE	FALSE
cg19389953	chr7	121939827	121939828	FEZF1-AS1	154860	-3883	CGI	FALSE	FALSE	TRUE
cg10150592	chr10	102440856	102440857	PAX2	5076	-64610	CGI	FALSE	FALSE	TRUE
cg20192747	chr18	44774846	44774847	IER3IP1	51124	-72100	CGI	TRUE	FALSE	FALSE
cg04127342	chr8	57358130	57358131	PENK	5179	1150	CGI-N-Shore	TRUE	TRUE	FALSE
cg12392473	chr20	48099331	48099332	KCNB1	3745	1157	CGI	TRUE	TRUE	FALSE
cg03523785	chr14	29234981	29234982	FOXG1	2290	-1304	CGI-N-Shore	TRUE	FALSE	FALSE
cg04169021	chr17	35060451	35060452	MRM1	79922	102425	CGI	FALSE	FALSE	TRUE
cg21895526	chr18	24765490	24765491	CHST9	83539	-200	CGI	TRUE	TRUE	FALSE
cg20040743	chr8	91803792	91803793	TMEM64	169200	65	CGI	TRUE	FALSE	FALSE
cg19470159	chr3	167967842	167967843	EGFEM1P	93556	531	CGI	FALSE	TRUE	FALSE
cg10177394	chr6	10385126	10385127	LOC100130275	100130275	-27423	CGI	FALSE	FALSE	TRUE
cg14473145	chr14	38725656	38725657	CLEC14A	161198	-81	CGI	TRUE	FALSE	FALSE
cg02983424	chr15	97491433	97491434	SPATA8	145946	164753	CGI	FALSE	FALSE	TRUE
cg08475096	chr4	158143750	158143751	GRIA2	2891	2454	CGI	FALSE	TRUE	FALSE
cg26925231	chr8	15094380	15094381	SGCZ	137868	1410	CGI	FALSE	TRUE	FALSE
cg09388605	chr8	56013800	56013801	XKR4	114786	-1215	CGI	TRUE	FALSE	FALSE
cg26947626	chr8	72469430	72469431	EYA1	2138	-194962	CGI	FALSE	FALSE	TRUE
cg15222899	chr18	55095249	55095250	ONECUT2	9480	-7666	CGI	FALSE	FALSE	TRUE
cg15174552	chr2	118982352	118982353	INSIG2	51141	136301	CGI-S-Shore	FALSE	FALSE	TRUE
cg03237648	chr10	7454759	7454760	SFMBT2	57713	-1310	CGI	TRUE	FALSE	FALSE
cg04598121	chr8	57358505	57358506	PENK	5179	775	CGI	TRUE	TRUE	FALSE
cg06152945	chr12	29303219	29303220	FAR2	55711	986	CGI-S-Shore	FALSE	TRUE	FALSE
cg12377139	chr10	22634218	22634219	SPAG6	9576	-154	CGI	TRUE	FALSE	FALSE
cg06268694	chr22	46932642	46932643	CELSR1	9620	423	CGI	TRUE	FALSE	FALSE
cg18358723	chr5	87955618	87955619	MIR9-2	407047	7137	CGI	FALSE	TRUE	FALSE
cg25645064	chr3	147096130	147096131	ZIC4	84107	28464	CGI-N-Shelf	FALSE	FALSE	TRUE
cg12382398	chr15	90358537	90358538	ANPEP	290	-464	CGI	TRUE	FALSE	FALSE
cg04738965	chr3	147127662	147127663	ZIC1	7545	480	CGI	TRUE	FALSE	FALSE
cg15449956	chr8	106331995	106331996	ZFPM2	23414	847	CGI	FALSE	TRUE	FALSE
cg06498267	chr5	45695922	45695923	HCN1	348980	296	CGI	TRUE	FALSE	FALSE
cg02662828	chr4	48492848	48492849	ZAR1	326340	538	CGI	TRUE	FALSE	FALSE
cg14473924	chr3	73674170	73674171	PDZRN3	23024	-97	CGI	TRUE	FALSE	FALSE
cg05835105	chr4	111543401	111543402	PITX2	5308	19876	CGI	FALSE	TRUE	FALSE
cg15205547	chr7	23514347	23514348	IGF2BP3	10643	-4351	CGI	FALSE	FALSE	TRUE
cg11176990	chr2	39187533	39187534	LOC375196	375196	-47	CGI	TRUE	TRUE	FALSE
cg00850073	chr5	139016870	139016871	CXXC5	51523	-11429	CGI-N-Shore	FALSE	FALSE	TRUE
cg24843380	chr5	178367827	178367828	ZNF454	285676	-365	CGI	TRUE	FALSE	FALSE
cg26549701	chr5	72599503	72599504	TMEM174	134288	130479	CGI	FALSE	FALSE	TRUE
cg00228017	chr18	53447841	53447842	TCF4	6925	-144652	CGI-S-Shore	FALSE	TRUE	FALSE
cg19942495	chr17	32484027	32484028	ASIC2	40	-201	CGI	TRUE	FALSE	FALSE
cg20585530	chr14	60975912	60975913	SIX6	4990	-24	CGI	TRUE	FALSE	FALSE
cg10023530	chr18	11148783	11148784	PIEZO2	63895	-21	CGI	TRUE	FALSE	FALSE
cg20697025	chr7	1553203	1553204	INTS1	26173	-9184	CGI	FALSE	FALSE	TRUE
cg09401099	chr3	156534380	156534381	LOC730091	730091	469	CGI	FALSE	TRUE	FALSE
cg09793172	chr1	21044101	21044102	KIF17	57576	214	CGI	TRUE	FALSE	FALSE
cg23995914	chr4	10459228	10459229	ZNF518B	85460	-195	CGI	TRUE	FALSE	FALSE
cg18473521	chr12	54448265	54448266	FLJ12825	440101	-3771	CGI	FALSE	TRUE	FALSE
cg02245004	chr15	76634887	76634888	ISL2	64843	5739	CGI	FALSE	FALSE	TRUE
cg24611446	chr12	113917737	113917738	LHX5	64211	-7859	CGI	FALSE	FALSE	TRUE
cg25148589	chr4	158141936	158141937	GRIA2	2891	640	CGI-S-Shore	TRUE	TRUE	FALSE
cg00750523	chr5	63802593	63802594	RGS7BP	401190	140	CGI	TRUE	FALSE	FALSE
cg08258526	chr8	49647734	49647735	EFCAB1	79645	134	CGI-N-Shore	TRUE	FALSE	FALSE
cg17977409	chr9	17579227	17579228	SH3GL2	6456	273	CGI	TRUE	FALSE	FALSE
cg23495748	chr5	175223636	175223637	CPLX2	10814	25	CGI-N-Shore	TRUE	FALSE	FALSE
cg26333652	chr5	2750758	2750759	IRX2	153572	1009	CGI	TRUE	TRUE	FALSE
cg09438147	chr2	210636533	210636534	UNC80	285175	-182	CGI	TRUE	FALSE	FALSE
cg05337137	chr4	6223463	6223464	LOC285484	285484	21002	CGI-N-Shore	FALSE	TRUE	FALSE
cg05168491	chr14	38080446	38080447	FOXA1	3169	-15956	CGI	TRUE	FALSE	FALSE
cg02829688	chr1	119527008	119527009	TBX15	6913	5169	CGI	FALSE	TRUE	FALSE
cg12685846	chr15	30114814	30114815	TJP1	7082	-107	CGI	TRUE	FALSE	FALSE
cg20809087	chr15	72612221	72612222	PARP6	56965	-48592	CGI	TRUE	TRUE	FALSE
cg27346707	chr5	126626348	126626349	MEGF10	84466	-106	CGI	TRUE	FALSE	FALSE
cg02446647	chr6	133562101	133562102	EYA4	2070	364	CGI	TRUE	TRUE	FALSE
cg12373771	chr22	17601381	17601382	CECR6	27439	874	CGI	TRUE	TRUE	FALSE
cg22043168	chr11	27741077	27741078	BDNF	627	2526	CGI	TRUE	TRUE	FALSE
cg24150153	chr1	94703463	94703464	ARHGAP29	9411	37159	CGI-S-Shore	TRUE	TRUE	FALSE
cg03963327	chr11	9025730	9025731	NRIP3	56675	-133	CGI	TRUE	FALSE	FALSE
cg22095604	chr18	31803241	31803242	NOL4	8715	272	CGI	TRUE	FALSE	FALSE
cg02940165	chr19	57149563	57149564	SMIM17	147670	-4962	Non-CGI	FALSE	FALSE	TRUE
cg17592231	chr11	43604758	43604759	MIR129-2	406918	1813	CGI-S-Shore	FALSE	FALSE	TRUE
cg15427886	chr8	55379663	55379664	SOX17	64321	9167	CGI	FALSE	FALSE	TRUE
cg03236802	chr6	32055316	32055317	TNXB	7148	30153	CGI	FALSE	TRUE	FALSE
cg12002303	chr15	68113478	68113479	SKOR1	390598	-4461	CGI	FALSE	FALSE	TRUE
cg00916899	chr20	35944932	35944933	MANBAL	63905	26880	Non-CGI	FALSE	TRUE	FALSE
cg24199834	chr4	147560126	147560127	POU4F2	5458	80	CGI	TRUE	FALSE	FALSE
cg19389884	chr11	1358515	1358516	LOC255512	255512	27576	CGI	FALSE	FALSE	TRUE
cg26664161	chr5	135265937	135265938	FBXL21	26223	-67	CGI	TRUE	FALSE	FALSE
cg09059319	chr8	99986175	99986176	OSR2	116039	29543	CGI	FALSE	FALSE	TRUE
cg11254700	chr19	53561386	53561387	ERVV-2	100271846	13394	CGI	FALSE	FALSE	TRUE
cg00065935	chr3	120627088	120627089	STXBP5L	9515	37	CGI	TRUE	FALSE	FALSE
cg24715735	chr19	35531403	35531404	HPN	3249	-5	CGI	TRUE	FALSE	FALSE
cg04100532	chr2	210636560	210636561	UNC80	285175	-155	CGI	TRUE	FALSE	FALSE
cg03397716	chr1	6484980	6484981	ESPN	83715	131	CGI	TRUE	FALSE	FALSE
cg05700079	chr3	147126961	147126962	ZIC1	7545	-218	CGI	TRUE	FALSE	FALSE
cg27223047	chr5	127874825	127874826	FBN2	2201	-908	CGI	TRUE	FALSE	FALSE
cg23893898	chr4	6247571	6247572	WFS1	7466	-24004	CGI	FALSE	FALSE	TRUE
cg11905007	chr3	62861071	62861072	CADPS	8618	-6	CGI	TRUE	FALSE	FALSE
cg02745847	chr17	47075880	47075881	IGF2BP1	10642	1105	CGI	FALSE	TRUE	FALSE
cg01582980	chr7	20825545	20825546	SP8	221833	961	CGI	TRUE	TRUE	FALSE
cg04090392	chr15	83952774	83952775	BNC1	646	692	CGI	TRUE	TRUE	FALSE
cg21011139	chr11	7695245	7695246	CYB5R2	51700	-250	CGI	TRUE	FALSE	FALSE
cg15618978	chr3	160167990	160167991	TRIM59	286827	-363	CGI	TRUE	FALSE	FALSE
cg06049781	chr2	72371838	72371839	CYP26B1	56603	3123	CGI	TRUE	TRUE	FALSE
cg25486757	chr3	73674074	73674075	PDZRN3	23024	-1	CGI	TRUE	FALSE	FALSE
cg18631996	chr5	139526080	139526081	IGIP	492311	20558	CGI	FALSE	FALSE	TRUE
cg13790603	chr3	24536478	24536479	THRB	7068	-24	CGI	TRUE	FALSE	FALSE
cg19464804	chr15	96884509	96884510	MIR1469	100302258	8018	CGI	FALSE	FALSE	TRUE
cg11705975	chr10	120354248	120354249	PRLHR	2834	910	CGI	TRUE	TRUE	FALSE
cg15439862	chr18	28622593	28622594	DSC3	1825	186	CGI	TRUE	FALSE	FALSE
cg11260097	chr7	121940647	121940648	FEZF1-AS1	154860	-3063	CGI	FALSE	FALSE	TRUE
cg23495279	chr8	4849827	4849828	CSMD1	64478	2499	CGI	FALSE	TRUE	FALSE
cg22694818	chr1	75595970	75595971	LHX8	431707	1850	CGI	TRUE	TRUE	FALSE
cg17241310	chr1	91182856	91182857	BARHL2	343472	-61	CGI-S-Shore	TRUE	FALSE	FALSE
cg25216196	chr17	19290520	19290521	MFAP4	4239	10	Non-CGI	TRUE	FALSE	FALSE
cg17200920	chr7	127808798	127808799	MIR129-1	406917	-39125	CGI	FALSE	FALSE	TRUE
cg07727884	chr17	19290503	19290504	MFAP4	4239	27	Non-CGI	TRUE	FALSE	FALSE
cg02657401	chr19	22469223	22469224	ZNF729	100287226	-27	CGI-N-Shore	TRUE	FALSE	FALSE
cg03215181	chr4	122873487	122873488	TRPC3	7222	-577	CGI-S-Shore	TRUE	FALSE	FALSE
cg14405924	chr10	131758112	131758113	EBF3	253738	3977	CGI	FALSE	TRUE	FALSE
cg15834072	chr4	155411603	155411604	DCHS2	54798	1325	CGI	TRUE	FALSE	FALSE
cg10168149	chr2	200335558	200335559	SATB2	23314	429	CGI	TRUE	TRUE	FALSE
cg27343616	chr20	17207697	17207698	PCSK2	5126	944	CGI	TRUE	TRUE	FALSE
cg00959431	chr9	79638117	79638118	FOXB2	442425	3545	CGI	FALSE	FALSE	TRUE
cg02624770	chr7	28997137	28997138	LOC100506497	100506497	-22444	CGI	TRUE	TRUE	FALSE
cg23944251	chr10	25464719	25464720	GPR158	57512	428	CGI	TRUE	FALSE	FALSE
cg00699993	chr4	158141570	158141571	GRIA2	2891	274	CGI	TRUE	TRUE	FALSE
cg14764661	chr17	60704382	60704383	MRC2	9902	-378	CGI-N-Shore	TRUE	FALSE	FALSE
cg13481132	chr9	138606811	138606812	KCNT1	57582	12779	CGI	FALSE	TRUE	FALSE
cg22162281	chr2	207139197	207139198	ZDBF2	57683	-324	CGI	TRUE	FALSE	FALSE
cg07365960	chr17	72848535	72848536	GRIN2C	2905	8429	CGI	FALSE	TRUE	FALSE
cg02355885	chr2	30142990	30142991	ALK	238	1485	CGI	TRUE	FALSE	FALSE
cg24698655	chr6	28557774	28557775	SCAND3	114821	-2661	CGI	FALSE	TRUE	FALSE
cg25236230	chr15	40212502	40212503	GPR176	11245	589	CGI	TRUE	FALSE	FALSE
cg14068328	chr6	85474087	85474088	TBX18	9096	-187	CGI	TRUE	FALSE	FALSE
cg06619066	chr18	24765154	24765155	CHST9	83539	133	CGI	TRUE	TRUE	FALSE
cg07028914	chr6	85474090	85474091	TBX18	9096	-190	CGI	TRUE	FALSE	FALSE
cg18343437	chr8	142528415	142528416	MROH5	389690	-11084	CGI	FALSE	FALSE	TRUE
cg24139093	chr15	97491245	97491246	SPATA8	145946	164565	CGI	FALSE	FALSE	TRUE
cg16271600	chr14	23450522	23450523	AJUBA	84962	1324	CGI	TRUE	FALSE	FALSE
cg17953764	chr4	48492845	48492846	ZAR1	326340	535	CGI	TRUE	FALSE	FALSE
cg05237641	chr10	128077307	128077308	ADAM12	8038	-179	CGI	TRUE	FALSE	FALSE
cg23049291	chr1	165204745	165204746	LMX1A	4009	121205	CGI	FALSE	TRUE	FALSE
cg08263071	chr6	94126643	94126644	EPHA7	2045	2655	CGI	FALSE	TRUE	FALSE
cg04005707	chr4	48988321	48988322	CWH43	80157	55	CGI	TRUE	FALSE	FALSE
cg18815943	chr1	47882314	47882315	FOXE3	2301	569	CGI	TRUE	FALSE	FALSE
cg21164131	chr12	63544923	63544924	AVPR1A	552	1665	CGI	TRUE	FALSE	FALSE
cg18770350	chr1	236849966	236849967	ACTN2	88	195	CGI	TRUE	FALSE	FALSE
cg22934295	chr3	42306385	42306386	CCK	885	1275	CGI	TRUE	TRUE	FALSE
cg17554604	chr7	140774522	140774523	TMEM178B	100507421	489	CGI	FALSE	TRUE	FALSE
cg19766441	chr4	25657365	25657366	SLC34A2	10568	-68	CGI	TRUE	FALSE	FALSE
cg13745201	chr3	14644237	14644238	CCDC174	51244	-49014	CGI	FALSE	FALSE	TRUE
cg18104919	chr5	7851396	7851397	C5orf49	134121	-131	CGI	TRUE	FALSE	FALSE
cg05344430	chr13	28366600	28366601	GSX1	219409	-178	CGI	TRUE	FALSE	FALSE
cg00466334	chr1	119532850	119532851	TBX15	6913	-670	CGI	TRUE	FALSE	FALSE
cg03365437	chr15	58357874	58357875	AQP9	366	-72519	CGI	TRUE	TRUE	FALSE
cg00123055	chr8	55370951	55370952	SOX17	64321	455	CGI	TRUE	FALSE	FALSE
cg18247055	chr10	22634226	22634227	SPAG6	9576	-146	CGI	TRUE	FALSE	FALSE
cg13481638	chr11	91957660	91957661	FAT3	120114	-127600	CGI	FALSE	FALSE	TRUE
cg15001747	chr17	35292587	35292588	LHX1	3975	-2183	CGI	FALSE	TRUE	FALSE
cg10943458	chr3	120627085	120627086	STXBP5L	9515	34	CGI	TRUE	FALSE	FALSE
cg13914083	chr4	158141526	158141527	GRIA2	2891	230	CGI	TRUE	TRUE	FALSE
cg02347074	chr2	223155925	223155926	CCDC140	151278	-6939	CGI	FALSE	TRUE	FALSE
cg03607115	chr4	106816844	106816845	NPNT	255743	246	CGI	TRUE	FALSE	FALSE
cg23588217	chr1	119530048	119530049	TBX15	6913	2129	CGI	FALSE	TRUE	FALSE
cg14582763	chr19	52956683	52956684	ZNF578	147660	-144	CGI-S-Shore	TRUE	FALSE	FALSE
cg02812207	chr4	119273827	119273828	PRSS12	8492	93	CGI	TRUE	FALSE	FALSE
cg12258042	chr8	4852036	4852037	CSMD1	64478	290	CGI	TRUE	FALSE	FALSE
cg10635122	chr19	52391090	52391091	ZNF577	84765	3053	CGI	TRUE	TRUE	FALSE
cg22851420	chr1	40149650	40149651	HPCAL4	51440	7437	CGI	FALSE	TRUE	FALSE
cg20755170	chr5	145720024	145720025	POU4F3	5459	1436	CGI	FALSE	TRUE	FALSE
cg12995800	chr5	151304312	151304313	GLRA1	2741	83	CGI	TRUE	FALSE	FALSE
cg00620733	chr17	41723536	41723537	MEOX1	4222	15724	CGI	FALSE	TRUE	FALSE
cg23257569	chr1	94703343	94703344	ARHGAP29	9411	37279	CGI	TRUE	TRUE	FALSE
cg05825420	chr10	119303479	119303480	EMX2OS	196047	1098	CGI	TRUE	TRUE	FALSE
cg20128928	chr4	104640560	104640561	TACR3	6870	411	CGI	TRUE	FALSE	FALSE
cg15557036	chr17	48041891	48041892	DLX4	1748	-4669	CGI-S-Shore	FALSE	FALSE	TRUE
cg05213896	chr19	50393653	50393654	MIR4750	100616314	2224	CGI	FALSE	TRUE	FALSE
cg00174428	chr1	165204791	165204792	LMX1A	4009	121159	CGI	FALSE	TRUE	FALSE
cg19099050	chr3	9594382	9594383	LHFPL4	375323	1102	CGI	TRUE	TRUE	FALSE
cg15007156	chr1	14925135	14925136	KAZN	23254	-76	CGI	TRUE	FALSE	FALSE
cg27606499	chr3	147111120	147111121	ZIC4	84107	13474	CGI	TRUE	TRUE	FALSE
cg08849574	chr19	58125953	58125954	ZNF134	7693	122	CGI	FALSE	TRUE	FALSE
cg06448705	chr5	135701094	135701095	TRPC7	57113	68	CGI	TRUE	FALSE	FALSE
cg08376141	chr6	32116591	32116592	PRRT1	80863	4267	CGI	FALSE	TRUE	FALSE
cg01472299	chr6	4775063	4775064	CDYL	9425	68669	CGI	TRUE	TRUE	FALSE
cg24768649	chr2	213402181	213402182	ERBB4	2066	1169	CGI	FALSE	TRUE	FALSE
cg01422881	chr1	44873692	44873693	RNF220	55182	2731	CGI	FALSE	TRUE	FALSE
cg02226810	chr6	1605352	1605353	FOXC1	2296	-5327	CGI	FALSE	FALSE	TRUE
cg19922137	chr1	210111561	210111562	SYT14	255928	22	CGI	TRUE	FALSE	FALSE
cg06419846	chr11	66083697	66083698	CD248	57124	816	CGI	TRUE	FALSE	FALSE
cg15984718	chr4	96470349	96470350	UNC5C	8633	10	CGI	TRUE	FALSE	FALSE
cg02456288	chr14	38053308	38053309	FOXA1	3169	11179	CGI-S-Shore	FALSE	FALSE	TRUE
cg12882697	chr5	1445549	1445550	SLC6A3	6531	-5	CGI	TRUE	FALSE	FALSE
cg12506971	chr4	171011264	171011265	AADAT	51166	106	CGI	TRUE	TRUE	FALSE
cg10137837	chr17	6926742	6926743	BCL6B	255877	372	CGI	FALSE	TRUE	FALSE
cg24809973	chr8	72468820	72468821	EYA1	2138	-194352	CGI	FALSE	FALSE	TRUE
cg13582816	chr4	85404099	85404100	NKX6-1	4825	15286	CGI	FALSE	FALSE	TRUE
cg03817667	chr7	54609953	54609954	VSTM2A	222008	-64	CGI	TRUE	FALSE	FALSE
cg00058879	chr22	40082173	40082174	CACNA1I	8911	115414	CGI	FALSE	TRUE	FALSE
cg27344587	chr2	63275602	63275603	LOC100132215	100132215	52	CGI	TRUE	FALSE	FALSE
cg07143083	chr7	70597921	70597922	WBSCR17	64409	131	CGI	TRUE	FALSE	FALSE
cg01405761	chr8	62200689	62200690	CLVS1	157807	163	CGI	TRUE	FALSE	FALSE
cg21632975	chr19	46456210	46456211	NOVA2	4858	20445	CGI	FALSE	TRUE	FALSE
cg05686497	chr5	127874587	127874588	FBN2	2201	-670	CGI	TRUE	FALSE	FALSE
cg12296772	chr8	17271067	17271068	MTMR7	9108	-26	CGI	TRUE	FALSE	FALSE
cg07622493	chr8	93114294	93114295	RUNX1T1	862	1158	CGI	FALSE	TRUE	FALSE
cg06719900	chr11	109292894	109292895	C11orf87	399947	47	CGI	TRUE	FALSE	FALSE
cg26113809	chr12	54132180	54132181	CALCOCO1	57658	-10872	CGI	FALSE	FALSE	TRUE
cg12670347	chr12	114847578	114847579	TBX5	6910	-1330	CGI	TRUE	TRUE	FALSE
cg26158959	chr1	210111162	210111163	SYT14	255928	-374	CGI-N-Shore	TRUE	FALSE	FALSE
cg07448060	chr7	79083753	79083754	MAGI2	9863	-862	CGI-S-Shore	TRUE	TRUE	FALSE
cg18780257	chr3	192126023	192126024	FGF12	2257	319363	CGI	TRUE	TRUE	FALSE
cg23016129	chr10	22634224	22634225	SPAG6	9576	-148	CGI	TRUE	FALSE	FALSE
cg16919569	chr4	174452835	174452836	NBLA00301	79804	1225	CGI	TRUE	TRUE	FALSE
cg18747408	chr10	130841097	130841098	MGMT	4255	-424355	CGI	FALSE	FALSE	TRUE
cg23713079	chr5	72715996	72715997	BTF3	689	-78252	CGI	FALSE	FALSE	TRUE
cg24880056	chr18	31158234	31158235	ASXL3	80816	-305	CGI	TRUE	FALSE	FALSE
cg10943359	chr4	165304531	165304532	2001-03-01	55016	-123	CGI	TRUE	FALSE	FALSE
cg09524907	chr8	56014406	56014407	XKR4	114786	-609	CGI	TRUE	FALSE	FALSE
cg09082287	chr1	65730494	65730495	DNAJC6	9829	10345	CGI-N-Shore	TRUE	TRUE	FALSE
cg05768427	chr3	127634188	127634189	KBTBD12	166348	-128	CGI	TRUE	FALSE	FALSE
cg07963234	chr4	5894923	5894924	CRMP1	1400	-137	CGI	TRUE	FALSE	FALSE
cg08578136	chr2	207139443	207139444	ZDBF2	57683	-78	CGI	TRUE	FALSE	FALSE
cg26931990	chr16	1661230	1661231	IFT140	9742	877	CGI-S-Shore	FALSE	TRUE	FALSE
cg18335796	chr8	91094472	91094473	CALB1	793	13213	CGI	TRUE	TRUE	FALSE
cg06829686	chr1	47910843	47910844	FOXD2	2306	9153	CGI	FALSE	FALSE	TRUE
cg24531022	chr5	102201825	102201826	PAM	5066	297	CGI	TRUE	FALSE	FALSE
cg04749646	chr2	217236630	217236631	2004-03-01	57574	118	CGI	TRUE	FALSE	FALSE
cg24715245	chr4	41258794	41258795	UCHL1	7345	-102	CGI-N-Shore	TRUE	FALSE	FALSE
cg00590324	chr6	134212732	134212733	TCF21	6943	2472	CGI	FALSE	TRUE	FALSE
cg01013590	chr2	120281719	120281720	SCTR	6344	307	CGI	FALSE	TRUE	FALSE
cg00529958	chr13	100624288	100624289	ZIC5	85416	-109	CGI	TRUE	FALSE	FALSE
cg12453631	chr3	157812226	157812227	SHOX2	6474	11724	CGI	FALSE	FALSE	TRUE
cg12196232	chr8	32504758	32504759	FUT10	84750	825904	CGI	TRUE	TRUE	FALSE
cg15229481	chr20	865829	865830	ANGPT4	51378	31129	CGI	FALSE	TRUE	FALSE
cg06808751	chr8	54163693	54163694	OPRK1	4986	499	CGI	TRUE	TRUE	FALSE
cg12052661	chr9	140772545	140772546	CACNA1B	774	303	CGI	TRUE	TRUE	FALSE
cg17306747	chr5	1446165	1446166	SLC6A3	6531	-621	CGI	TRUE	FALSE	FALSE
cg01718742	chr16	62070184	62070185	CDH8	1006	553	CGI	TRUE	FALSE	FALSE
cg17101296	chr8	145925708	145925709	ARHGAP39	80728	-14513	CGI	FALSE	FALSE	TRUE
cg13921352	chr3	68981890	68981891	FAM19A4	151647	-128	CGI	TRUE	FALSE	FALSE
cg13222752	chr14	74892569	74892570	SYNDIG1L	646658	234	CGI-N-Shore	FALSE	TRUE	FALSE
cg17939805	chr18	44773988	44773989	IER3IP1	51124	-71242	CGI	FALSE	TRUE	FALSE
cg03891590	chr10	21814313	21814314	SKIDA1	387640	296	CGI	FALSE	TRUE	FALSE
cg14699728	chr11	66188522	66188523	NPAS4	266743	46	CGI	TRUE	FALSE	FALSE
cg10836392	chr22	44258132	44258133	SULT4A1	25830	244	CGI	TRUE	FALSE	FALSE
cg01172150	chr16	30817443	30817444	ZNF629	23361	-18919	CGI	FALSE	FALSE	TRUE
cg11909748	chr19	52956674	52956675	ZNF578	147660	-153	CGI-S-Shore	TRUE	FALSE	FALSE
cg00116092	chr1	217313044	217313045	ESRRG	2104	-1946	CGI	TRUE	FALSE	FALSE
cg06139908	chr7	54614620	54614621	VSTM2A	222008	4600	CGI	FALSE	TRUE	FALSE
cg20106459	chr19	55866087	55866088	COX6B2	125965	374	CGI	TRUE	TRUE	FALSE
cg12894649	chr20	11871396	11871397	BTBD3	22903	-79	CGI	TRUE	FALSE	FALSE
cg01281911	chr1	47882686	47882687	FOXE3	2301	941	CGI	TRUE	FALSE	FALSE
cg15562220	chr6	25652395	25652396	SCGN	10590	-32	CGI-N-Shore	TRUE	FALSE	FALSE
cg17227967	chr20	9496556	9496557	LAMP5	24141	1550	CGI	FALSE	TRUE	FALSE
cg07780095	chr12	85674296	85674297	ALX1	8092	259	CGI	FALSE	TRUE	FALSE
cg00590036	chr6	158957433	158957434	TMEM181	57583	-33	CGI	TRUE	FALSE	FALSE
cg27215033	chr2	177001380	177001381	HOXD-AS2	100506783	444	CGI	TRUE	FALSE	FALSE
cg25084878	chr5	127873711	127873712	FBN2	2201	203	CGI	TRUE	FALSE	FALSE
cg26705266	chr11	69924339	69924340	ANO1	55107	-67	CGI	TRUE	FALSE	FALSE
cg15452970	chr1	91190620	91190621	BARHL2	343472	-7825	CGI	FALSE	FALSE	TRUE
cg12765028	chr4	13526659	13526660	LOC285547	285547	6380	CGI	FALSE	FALSE	TRUE
cg12832726	chr11	68096165	68096166	LRP5	4041	16056	CGI	FALSE	TRUE	FALSE
cg15614917	chr19	19384165	19384166	HAPLN4	404037	-90	CGI	TRUE	FALSE	FALSE
cg11323198	chr16	62069806	62069807	CDH8	1006	931	CGI	FALSE	TRUE	FALSE
cg04804377	chr2	17699746	17699747	RAD51AP2	729475	11933	CGI	TRUE	TRUE	FALSE
cg17966560	chr1	156357871	156357872	RHBG	57127	18867	CGI-N-Shore	FALSE	FALSE	TRUE
cg25288897	chr7	103085984	103085985	SLC26A5	375611	638	CGI	FALSE	TRUE	FALSE
cg01851378	chr16	51186925	51186926	SALL1	6299	-1741	CGI	TRUE	FALSE	FALSE
cg24938830	chr2	210636539	210636540	UNC80	285175	-176	CGI	TRUE	FALSE	FALSE
cg21381065	chr18	49866304	49866305	DCC	1630	-236	CGI	TRUE	FALSE	FALSE
cg13300273	chr1	200842890	200842891	GPR25	2848	723	CGI	TRUE	FALSE	FALSE
cg11460727	chr8	22548952	22548953	EGR3	1960	1861	CGI	FALSE	TRUE	FALSE
cg20019985	chr11	32008961	32008962	PAX6	5080	-169451	CGI	FALSE	TRUE	FALSE
cg24613080	chr17	32484035	32484036	ASIC2	40	-209	CGI	TRUE	FALSE	FALSE
cg14055896	chr19	54481859	54481860	MIR935	100126325	-3700	CGI	FALSE	TRUE	FALSE
cg19965221	chr15	30114474	30114475	TJP1	7082	230	CGI	TRUE	FALSE	FALSE
cg00204501	chr15	30114651	30114652	TJP1	7082	53	CGI	TRUE	FALSE	FALSE
cg25514273	chr13	70681804	70681805	ATXN8OS	6315	458	CGI	TRUE	FALSE	FALSE
cg10290276	chr11	2291754	2291755	ASCL2	430	426	CGI	TRUE	FALSE	FALSE
cg03431846	chr14	24641183	24641184	REC8	9985	-49	CGI	TRUE	FALSE	FALSE
cg13974192	chr13	53775410	53775411	OLFM4	10562	172533	CGI	FALSE	FALSE	TRUE
cg18952796	chr7	98246633	98246634	NPTX2	4885	35	CGI	TRUE	FALSE	FALSE
cg15957394	chr4	7941823	7941824	AFAP1	60312	-169	CGI	TRUE	FALSE	FALSE
cg21573200	chr5	2739602	2739603	IRX2	153572	12165	CGI	FALSE	FALSE	TRUE
cg20884298	chr13	46190037	46190038	FAM194B	220081	-162	CGI-S-Shore	TRUE	FALSE	FALSE
cg23094674	chr1	204329186	204329187	PLEKHA6	22874	-141	CGI-N-Shelf	TRUE	FALSE	FALSE
cg00177388	chr5	72677886	72677887	BTF3	689	-116362	CGI	FALSE	FALSE	TRUE
cg12189835	chr11	61335071	61335072	SYT7	9066	13271	CGI	FALSE	TRUE	FALSE
cg11354629	chr13	28366598	28366599	GSX1	219409	-180	CGI	TRUE	FALSE	FALSE
cg04606861	chr12	132905735	132905736	GALNT9	50614	168	CGI	TRUE	FALSE	FALSE
cg17283453	chr19	9473880	9473881	ZNF177	7730	183	CGI	FALSE	TRUE	FALSE
cg04402007	chr8	35093901	35093902	UNC5D	137970	925	CGI	FALSE	TRUE	FALSE
cg07012926	chr5	151304488	151304489	GLRA1	2741	-90	CGI-S-Shore	TRUE	FALSE	FALSE
cg14049470	chr10	20105452	20105453	PLXDC2	84898	79	CGI	TRUE	FALSE	FALSE
cg04792712	chr8	17271105	17271106	MTMR7	9108	-64	CGI	TRUE	FALSE	FALSE
cg06488443	chr2	162280341	162280342	TBR1	10716	7720	CGI	FALSE	TRUE	FALSE
cg11215976	chr1	236849942	236849943	ACTN2	88	171	CGI	TRUE	FALSE	FALSE
cg27591349	chr10	54074250	54074251	DKK1	22943	208	CGI	TRUE	FALSE	FALSE
cg04753583	chr21	47062565	47062566	PCBP3	54039	-1116	CGI	TRUE	FALSE	FALSE
cg00552235	chr7	100943163	100943164	RABL5	64792	21928	CGI	FALSE	FALSE	TRUE
cg25079568	chr18	52989604	52989605	MIR4529	100616290	-156846	CGI	TRUE	TRUE	FALSE
cg15475851	chr10	105037349	105037350	INA	9118	428	CGI	TRUE	FALSE	FALSE
cg06204735	chr14	74892986	74892987	SYNDIG1L	646658	-180	CGI	TRUE	FALSE	FALSE
cg19021738	chr19	9517604	9517605	ZNF266	10781	28628	CGI	FALSE	FALSE	TRUE
cg15201877	chr1	71512973	71512974	PTGER3	5733	516	CGI	TRUE	FALSE	FALSE
cg24353443	chr3	73674166	73674167	PDZRN3	23024	-93	CGI	TRUE	FALSE	FALSE
cg23553442	chr9	74062096	74062097	TRPM3	80036	-275	CGI-S-Shore	TRUE	FALSE	FALSE
cg14317285	chr3	181444870	181444871	SOX2	6657	15157	CGI	FALSE	TRUE	FALSE
cg26118906	chr14	58332488	58332489	SLC35F4	341880	102	CGI-S-Shore	TRUE	FALSE	FALSE
cg07536910	chr2	176948105	176948106	EVX2	344191	583	CGI	TRUE	FALSE	FALSE
cg24446586	chr7	27225078	27225079	HOXA11-AS	221883	50	CGI	TRUE	FALSE	FALSE
cg26619317	chr1	95392389	95392390	CNN3	1266	344	CGI	TRUE	TRUE	FALSE
cg19678828	chr21	27945413	27945414	CYYR1	116159	166	CGI	TRUE	FALSE	FALSE
cg06713632	chr19	49576056	49576057	KCNA7	3743	140	CGI	TRUE	FALSE	FALSE
cg12838303	chr6	154360670	154360671	OPRM1	4988	29038	CGI	TRUE	TRUE	FALSE
cg05383490	chr13	108518955	108518956	FAM155A	728215	503	CGI	TRUE	FALSE	FALSE
cg25670685	chr13	102068432	102068433	NALCN	259232	409	CGI	FALSE	TRUE	FALSE
cg24543696	chr11	12031046	12031047	DKK3	27122	268	CGI	TRUE	TRUE	FALSE
cg00089091	chr2	115919950	115919951	LOC389023	389023	-1029	CGI	TRUE	TRUE	FALSE
cg11982293	chr2	175205387	175205388	SP9	100131390	5565	CGI	FALSE	FALSE	TRUE
cg21694941	chr8	57358590	57358591	PENK	5179	690	CGI	TRUE	TRUE	FALSE
cg11831981	chr15	51973661	51973662	SCG3	29106	110	CGI	TRUE	FALSE	FALSE
cg06202228	chr9	13279482	13279483	MPDZ	8777	79	CGI	TRUE	FALSE	FALSE
cg14472366	chr13	20875915	20875916	GJB6	10804	-69380	CGI	FALSE	FALSE	TRUE
cg01889237	chr6	137816623	137816624	OLIG3	167826	-1091	CGI	TRUE	FALSE	FALSE
cg18023598	chr1	19992504	19992505	HTR6	3362	723	CGI	TRUE	FALSE	FALSE
cg04792813	chr14	100070043	100070044	CCDC85C	317762	682	CGI	TRUE	FALSE	FALSE
cg21496658	chr3	154797677	154797678	MME	4311	55763	CGI	TRUE	TRUE	FALSE
cg10625705	chr20	307320	307321	SOX12	6666	1080	CGI	TRUE	FALSE	FALSE
cg05374654	chr11	94134666	94134667	GPR83	10888	-80	CGI	TRUE	FALSE	FALSE
cg09848096	chr10	118928012	118928013	MIR3663	100500893	-726	CGI	TRUE	FALSE	FALSE
cg18438853	chr1	116381082	116381083	NHLH2	4808	2663	CGI-S-Shore	TRUE	TRUE	FALSE
cg02683759	chr2	157177072	157177073	NR4A2	4929	12213	CGI	FALSE	FALSE	TRUE
cg08370996	chr15	96874031	96874032	MIR1469	100302258	-2457	CGI	TRUE	TRUE	FALSE
cg12161228	chr11	89224506	89224507	NOX4	50507	98271	CGI	TRUE	TRUE	FALSE
cg15895690	chr14	60982635	60982636	SIX6	4990	6696	CGI	FALSE	FALSE	TRUE
cg18136932	chr5	7851231	7851232	C5orf49	134121	31	CGI	TRUE	FALSE	FALSE
cg27403635	chr5	113698291	113698292	KCNN2	3781	274	CGI	TRUE	FALSE	FALSE
cg13633270	chr18	55095555	55095556	ONECUT2	9480	-7360	CGI	FALSE	FALSE	TRUE
cg06149302	chr11	134147143	134147144	GLB1L3	112937	867	CGI	TRUE	TRUE	FALSE
cg14934413	chr11	20184162	20184163	DBX1	120237	-2291	CGI	FALSE	FALSE	TRUE
cg24818566	chr9	122132054	122132055	DBC1	1620	-314	CGI	TRUE	FALSE	FALSE
cg03161190	chr10	104535792	104535793	WBP1L	54838	32064	Non-CGI	TRUE	TRUE	FALSE
cg14246617	chr3	69788840	69788841	MITF	4286	253	CGI	TRUE	FALSE	FALSE
cg13791254	chr9	100616607	100616608	FOXE1	2304	1069	CGI	TRUE	FALSE	FALSE
cg18866015	chr18	49868552	49868553	DCC	1630	2009	CGI	FALSE	TRUE	FALSE
cg27549720	chr1	19992167	19992168	HTR6	3362	386	CGI	TRUE	FALSE	FALSE
cg00049047	chr5	37838425	37838426	GDNF	2668	1355	CGI	FALSE	TRUE	FALSE
cg01352175	chr18	44773985	44773986	IER3IP1	51124	-71239	CGI	FALSE	TRUE	FALSE
cg06584494	chr7	54614477	54614478	VSTM2A	222008	4457	CGI	FALSE	TRUE	FALSE
cg08621843	chr2	128180488	128180489	MIR4783	100616187	704	CGI	FALSE	TRUE	FALSE
cg03342498	chr6	10411372	10411373	LOC100130275	100130275	-1177	CGI	TRUE	TRUE	FALSE
cg02442436	chr9	112402882	112402883	PALM2	114299	-184	CGI	TRUE	FALSE	FALSE
cg08023265	chr1	31158138	31158139	MATN1-AS1	100129196	-33479	CGI	FALSE	FALSE	TRUE
cg07072366	chr8	19798005	19798006	LPL	4023	1422	CGI	FALSE	TRUE	FALSE
cg07408835	chr5	140306377	140306378	PCDHAC1	56135	74	CGI	TRUE	TRUE	FALSE
cg03045635	chr4	9783198	9783199	DRD5	1816	-58	CGI	TRUE	FALSE	FALSE
cg18698884	chr11	16632724	16632725	C11orf58	10944	-127422	CGI	FALSE	TRUE	FALSE
cg18445088	chr22	40081812	40081813	CACNA1I	8911	115053	CGI	FALSE	TRUE	FALSE
cg20147326	chr11	33913538	33913539	LMO2	4005	296	Non-CGI	TRUE	FALSE	FALSE
cg15504461	chr3	147140880	147140881	ZIC1	7545	13698	CGI	FALSE	FALSE	TRUE
cg04598517	chr5	1445542	1445543	SLC6A3	6531	0	CGI	TRUE	FALSE	FALSE
cg22879667	chr4	4868441	4868442	MSX1	4487	7048	CGI	FALSE	FALSE	TRUE
cg23288973	chr5	135701050	135701051	TRPC7	57113	112	CGI-N-Shore	TRUE	FALSE	FALSE
cg07035165	chr5	113698506	113698507	KCNN2	3781	489	CGI	TRUE	FALSE	FALSE
cg05142982	chr8	495736	495737	C8orf42	157695	-404	CGI	TRUE	FALSE	FALSE
cg24500959	chr10	99474813	99474814	MARVELD1	83742	1347	CGI-S-Shore	TRUE	FALSE	FALSE
cg21916108	chr8	106330559	106330560	ZFPM2	23414	-586	CGI	TRUE	FALSE	FALSE
cg11563680	chr6	100917397	100917398	SIM1	6492	-4591	CGI	FALSE	FALSE	TRUE
cg07684796	chr10	54074209	54074210	DKK1	22943	167	CGI	TRUE	FALSE	FALSE
cg18516557	chr2	177004015	177004016	HOXD-AS2	100506783	-2188	CGI	FALSE	TRUE	FALSE
cg00008033	chr19	52429980	52429981	ZNF613	79898	-706	CGI-N-Shore	TRUE	FALSE	FALSE
cg14566959	chr5	140772681	140772682	PCDHGB5	56101	-5012	CGI	TRUE	TRUE	FALSE
cg22300282	chr6	72130553	72130554	LINC00472	79940	-104	CGI	TRUE	FALSE	FALSE
cg21697851	chr21	38076869	38076870	SIM2	6493	4877	CGI	FALSE	TRUE	FALSE
cg14719951	chr18	28622474	28622475	DSC3	1825	305	CGI	FALSE	TRUE	FALSE
cg10506882	chr3	35681627	35681628	ARPP21	10777	545	CGI	TRUE	FALSE	FALSE
cg25191850	chr1	233749633	233749634	KCNK1	3775	-115	CGI	TRUE	FALSE	FALSE
cg16655791	chr6	106429610	106429611	PRDM1	639	-104583	CGI	FALSE	FALSE	TRUE
cg10852154	chr6	42421757	42421758	TRERF1	55809	-1891	CGI	TRUE	FALSE	FALSE
cg21638161	chr8	144512759	144512760	MAFA	389692	-156	CGI	TRUE	FALSE	FALSE
cg07103129	chr6	50787964	50787965	TFAP2B	7021	1524	CGI	FALSE	TRUE	FALSE
cg17213402	chr2	5813650	5813651	SOX11	6664	-19147	CGI	FALSE	FALSE	TRUE
cg19748093	chr1	113392388	113392389	AKR7A2P1	246182	-73582	CGI	TRUE	FALSE	FALSE
cg11574469	chr6	72130615	72130616	LINC00472	79940	-166	CGI	TRUE	FALSE	FALSE
cg04905434	chr8	144512773	144512774	MAFA	389692	-170	CGI	TRUE	FALSE	FALSE
cg17605476	chr4	158143917	158143918	GRIA2	2891	2621	CGI	FALSE	TRUE	FALSE
cg27499860	chr8	144798544	144798545	MAPK15	225689	36	CGI	TRUE	FALSE	FALSE
cg08540945	chr7	152591698	152591699	ACTR3B	57180	134846	CGI	FALSE	FALSE	TRUE
cg00875989	chr18	44774054	44774055	IER3IP1	51124	-71308	CGI	FALSE	TRUE	FALSE
cg03301200	chr8	99954557	99954558	STK3	6788	314	CGI	FALSE	TRUE	FALSE
cg00484358	chr1	110610995	110610996	ALX3	257	2325	CGI	FALSE	TRUE	FALSE
cg26770907	chr16	48844808	48844809	N4BP1	9683	-200687	CGI	FALSE	FALSE	TRUE
cg07642566	chr19	4769676	4769677	MIR7-3HG	284424	558	CGI	TRUE	TRUE	FALSE
cg12166610	chr8	31498256	31498257	NRG1	3084	1344	CGI	FALSE	TRUE	FALSE
cg21183256	chr8	73163868	73163869	LOC392232	392232	0	CGI	TRUE	FALSE	FALSE
cg19401340	chr17	56833197	56833198	PPM1E	22843	-33	CGI	TRUE	FALSE	FALSE
cg00511674	chr16	78080068	78080069	CLEC3A	10143	23624	CGI	FALSE	FALSE	TRUE
cg16431436	chr5	82768907	82768908	VCAN	1462	1413	CGI	FALSE	TRUE	FALSE
cg17437939	chr7	97361252	97361253	TAC1	6863	-17	CGI	TRUE	FALSE	FALSE
cg21200656	chr20	21378072	21378073	NKX2-4	644524	-24	CGI	TRUE	FALSE	FALSE
cg02390209	chr16	25703018	25703019	HS3ST4	9951	-327	CGI	TRUE	FALSE	FALSE
cg04528819	chr7	130418315	130418316	KLF14	136259	571	CGI	TRUE	FALSE	FALSE
cg00100800	chr9	109625179	109625180	ZNF462	58499	-197	CGI-S-Shore	TRUE	FALSE	FALSE
cg25739875	chr6	10419684	10419685	TFAP2A	7020	111	CGI	TRUE	FALSE	FALSE
cg22264930	chr17	15244482	15244483	TEKT3	64518	474	CGI	FALSE	TRUE	FALSE
cg26557693	chr7	27265159	27265160	EVX1	2128	-17003	CGI	FALSE	FALSE	TRUE
cg19821713	chr15	96909816	96909817	MIR1469	100302258	33325	CGI	FALSE	FALSE	TRUE
cg25763393	chr19	52956832	52956833	ZNF578	147660	2	CGI	TRUE	FALSE	FALSE
cg23290344	chr8	24771466	24771467	NEFM	4741	191	CGI	TRUE	FALSE	FALSE
cg12325536	chr5	87968658	87968659	MIR9-2	407047	-5900	CGI	FALSE	TRUE	FALSE
cg27353143	chr19	38308057	38308058	LOC644554	644554	5	CGI	TRUE	FALSE	FALSE
cg25403721	chr12	114885372	114885373	TBX5	6910	-39124	CGI	FALSE	FALSE	TRUE
cg00393837	chr2	105470050	105470051	POU3F3	5455	-1917	CGI	TRUE	FALSE	FALSE
cg22635491	chr12	115109934	115109935	TBX3	6926	12033	CGI	FALSE	TRUE	FALSE
cg05036656	chr4	41875470	41875471	TMEM33	55161	-61665	CGI	FALSE	FALSE	TRUE
cg01851450	chr6	146864335	146864336	RAB32	10981	-491	CGI	TRUE	FALSE	FALSE
cg01449136	chr14	61109317	61109318	SIX1	6495	6836	CGI	FALSE	FALSE	TRUE
cg27076669	chr12	69327457	69327458	CPM	1368	29561	CGI	TRUE	TRUE	FALSE
cg13784792	chr17	39942930	39942931	JUP	3728	32	CGI	TRUE	FALSE	FALSE
cg05476568	chr3	153840109	153840110	ARHGEF26-AS1	100507524	-1109	CGI	TRUE	TRUE	FALSE
cg09054633	chr5	136834294	136834295	SPOCK1	6695	722	CGI	TRUE	TRUE	FALSE
cg17368808	chr20	9496892	9496893	LAMP5	24141	1886	CGI	FALSE	TRUE	FALSE
cg13806741	chr11	82443436	82443437	FAM181B	220382	1468	CGI-N-Shore	TRUE	FALSE	FALSE
cg08316825	chr5	151304547	151304548	GLRA1	2741	-149	CGI	TRUE	FALSE	FALSE
cg07850604	chr14	36003443	36003444	INSM2	84684	194	CGI	TRUE	FALSE	FALSE
cg22809047	chr2	101618261	101618262	RPL31	6160	-428	CGI-N-Shore	TRUE	FALSE	FALSE
cg00247557	chr18	5197071	5197072	C18orf42	642597	182	CGI	TRUE	FALSE	FALSE
cg08681855	chr19	52957051	52957052	ZNF578	147660	221	CGI	FALSE	TRUE	FALSE
cg24863335	chr18	70535406	70535407	NETO1	81832	-595	CGI	TRUE	FALSE	FALSE
cg08557649	chr15	76639713	76639714	ISL2	64843	10565	CGI	FALSE	FALSE	TRUE
cg23018092	chr5	126626364	126626365	MEGF10	84466	-90	CGI	TRUE	FALSE	FALSE
cg00069242	chr14	23450527	23450528	AJUBA	84962	1319	CGI	TRUE	FALSE	FALSE
cg07489048	chr14	29236898	29236899	FOXG1	2290	610	CGI	TRUE	FALSE	FALSE
cg06849504	chr1	91301484	91301485	BARHL2	343472	-118689	CGI	TRUE	TRUE	FALSE
cg21640187	chr6	4282172	4282173	ECI2	10455	-146340	CGI	FALSE	FALSE	TRUE
cg00560542	chr10	75407634	75407635	MYOZ1	58529	-6118	CGI	FALSE	TRUE	FALSE
cg00024086	chr7	156814491	156814492	LOC645249	645249	10939	CGI	FALSE	FALSE	TRUE
cg18471993	chr6	100917416	100917417	SIM1	6492	-4610	CGI	FALSE	FALSE	TRUE
cg25634742	chr6	146864328	146864329	RAB32	10981	-498	CGI	TRUE	FALSE	FALSE
cg10281977	chr14	105070864	105070865	TMEM179	388021	231	CGI	TRUE	FALSE	FALSE
cg17046577	chr7	84815361	84815362	SEMA3D	223117	808	CGI	FALSE	TRUE	FALSE
cg16150752	chr5	16180072	16180073	2011-03-01	441061	-174	CGI	TRUE	FALSE	FALSE
cg14866863	chr14	58332116	58332117	SLC35F4	341880	474	CGI	FALSE	TRUE	FALSE
cg24306982	chr1	119549312	119549313	TBX15	6913	-17132	CGI	FALSE	FALSE	TRUE
cg16026922	chr4	41259044	41259045	UCHL1	7345	145	CGI	FALSE	TRUE	FALSE
cg09655666	chr17	34820190	34820191	TBC1D3G	654341	-12086	CGI	FALSE	FALSE	TRUE
cg03333330	chr7	93520346	93520347	TFPI2	7980	-280	CGI	TRUE	TRUE	FALSE
cg16024950	chr7	100254149	100254150	ACTL6B	51412	-64	CGI	TRUE	FALSE	FALSE
cg17349389	chr2	80530770	80530771	LRRTM1	347730	715	CGI	TRUE	TRUE	FALSE
cg27044841	chr8	8580960	8580961	CLDN23	137075	21293	CGI	FALSE	FALSE	TRUE
cg26153410	chr12	103358619	103358620	ASCL1	429	7166	CGI-N-Shore	FALSE	FALSE	TRUE
cg25942450	chr5	170736251	170736252	TLX3	30012	-35	CGI	TRUE	FALSE	FALSE
cg05502701	chr3	73674160	73674161	PDZRN3	23024	-87	CGI	TRUE	FALSE	FALSE
cg25121513	chr7	25898206	25898207	MIR148A	406940	91398	CGI	FALSE	FALSE	TRUE
cg16700282	chr17	46796298	46796299	PRAC	84366	3582	CGI	FALSE	FALSE	TRUE
cg15108590	chr21	44494906	44494907	CBS	875	1564	CGI	FALSE	TRUE	FALSE
cg01625087	chr6	101841008	101841009	GRIK2	2898	-5659	CGI	TRUE	FALSE	FALSE
cg16065021	chr12	127940654	127940655	FLJ37505	400087	-425506	CGI	FALSE	FALSE	TRUE
cg11145160	chr3	170136278	170136279	CLDN11	5010	-373	CGI	TRUE	FALSE	FALSE
cg16100120	chr2	56150475	56150476	EFEMP1	2202	821	CGI	FALSE	TRUE	FALSE
cg21376774	chr18	12254241	12254242	CIDEA	1149	-75	CGI	TRUE	FALSE	FALSE
cg21884231	chr3	170303721	170303722	SLC7A14	57709	140	CGI	TRUE	TRUE	FALSE
cg06291867	chr10	92617162	92617163	HTR7	3363	507	CGI	TRUE	FALSE	FALSE
cg10722226	chr1	214156203	214156204	PROX1	5629	-5081	CGI	FALSE	FALSE	TRUE
cg19375123	chr19	4535388	4535389	LRG1	116844	4646	CGI	TRUE	TRUE	FALSE
cg06062984	chr3	22413960	22413961	ZNF385D	79750	161	CGI	TRUE	FALSE	FALSE
cg06676637	chr18	56940333	56940334	RAX	30062	290	CGI	TRUE	FALSE	FALSE
cg25984344	chr10	128994608	128994609	FAM196A	642938	-185	CGI	TRUE	TRUE	FALSE
cg12892303	chr17	42733592	42733593	C17orf104	284071	-168	CGI	TRUE	FALSE	FALSE
cg24109612	chr6	19838817	19838818	ID4	3400	1199	CGI	FALSE	TRUE	FALSE
cg00858840	chr2	171573839	171573840	SP5	389058	1981	CGI	FALSE	TRUE	FALSE
cg12636169	chr1	217309970	217309971	ESRRG	2104	1125	CGI	FALSE	TRUE	FALSE
cg09295081	chr2	11810183	11810184	NTSR2	23620	144	CGI	TRUE	FALSE	FALSE
cg04908625	chr3	123166882	123166883	ADCY5	111	508	CGI	TRUE	FALSE	FALSE
cg03625109	chr9	122132103	122132104	DBC1	1620	-363	CGI	TRUE	FALSE	FALSE
cg00952322	chr22	41763266	41763267	TEF	7008	-124	Non-CGI	TRUE	FALSE	FALSE
cg05798720	chr18	24235718	24235719	KCTD1	284252	-15409	CGI	FALSE	FALSE	TRUE
cg17165841	chr2	207507001	207507002	LOC200726	200726	-139	CGI	TRUE	FALSE	FALSE
cg18184411	chr1	53309261	53309262	ZYG11A	440590	1077	CGI-S-Shore	FALSE	TRUE	FALSE
cg13066983	chr3	68057306	68057307	FAM19A1	407738	16571	CGI-S-Shore	TRUE	TRUE	FALSE
cg14512563	chr15	96897190	96897191	MIR1469	100302258	20699	CGI	FALSE	FALSE	TRUE
cg27658304	chr5	139017367	139017368	CXXC5	51523	-10932	CGI	FALSE	FALSE	TRUE
cg03793270	chr11	89224684	89224685	NOX4	50507	98093	CGI	TRUE	TRUE	FALSE
cg19162158	chr8	32405427	32405428	NRG1	3084	908515	CGI	TRUE	TRUE	FALSE
cg18273840	chr5	45695643	45695644	HCN1	348980	575	CGI	FALSE	TRUE	FALSE
cg26872137	chr8	35092870	35092871	UNC5D	137970	-103	CGI	TRUE	FALSE	FALSE
cg25627226	chr18	4455337	4455338	DLGAP1	9229	-70	CGI	TRUE	FALSE	FALSE
cg15843567	chr10	26223206	26223207	MYO3A	53904	203	CGI	TRUE	FALSE	FALSE
cg18517195	chr15	71184476	71184477	THAP10	56906	294	CGI	TRUE	TRUE	FALSE
cg04103761	chr1	26735606	26735607	LIN28A	79727	-1661	CGI-S-Shore	TRUE	FALSE	FALSE
cg19915738	chr19	44952730	44952731	ZNF229	7772	34	CGI	TRUE	FALSE	FALSE
cg05533124	chr18	24443298	24443299	AQP4-AS1	147429	-1972	CGI	TRUE	TRUE	FALSE
cg08445263	chr15	27216277	27216278	GABRG3	2567	-150	CGI	TRUE	FALSE	FALSE
cg16664405	chr10	111216962	111216963	XPNPEP1	7511	466347	CGI	FALSE	FALSE	TRUE
cg02631838	chr1	33358788	33358789	HPCA	3208	6689	CGI	FALSE	TRUE	FALSE
cg26844246	chr5	170736277	170736278	TLX3	30012	-9	CGI	TRUE	FALSE	FALSE
cg02327997	chr10	128077318	128077319	ADAM12	8038	-190	CGI	TRUE	FALSE	FALSE
cg14583673	chr5	15499895	15499896	FBXL7	23194	-408	CGI	TRUE	FALSE	FALSE
cg05981335	chr12	81102562	81102563	MYF6	4618	1153	CGI	FALSE	TRUE	FALSE
cg10791926	chr2	172949284	172949285	DLX1	1745	-922	CGI	TRUE	FALSE	FALSE
cg04044664	chr5	132150117	132150118	SOWAHA	134548	1083	CGI	TRUE	FALSE	FALSE
cg02662277	chr10	60936383	60936384	PHYHIPL	84457	34	CGI	TRUE	FALSE	FALSE
cg17370163	chr5	63461654	63461655	RNF180	285671	-15	CGI	TRUE	FALSE	FALSE
cg03332469	chr7	156796967	156796968	MNX1	3110	6378	CGI	FALSE	TRUE	FALSE
cg18347642	chr4	21950766	21950767	KCNIP4	80333	-391	CGI	TRUE	FALSE	FALSE
cg19713460	chr22	39745530	39745531	TAB1	10454	-422	CGI-N-Shore	TRUE	FALSE	FALSE
cg17061244	chr12	81331469	81331470	LIN7A	8825	223	CGI	TRUE	FALSE	FALSE
cg15081351	chr10	26222922	26222923	MYO3A	53904	-78	CGI-N-Shore	TRUE	FALSE	FALSE
cg10743390	chr19	30020728	30020729	VSTM2B	342865	3236	CGI	FALSE	TRUE	FALSE
cg08812889	chr4	174439925	174439926	HAND2	9464	11451	CGI	FALSE	FALSE	TRUE
cg26584120	chr7	2152705	2152706	MAD1L1	8379	119876	CGI	FALSE	TRUE	FALSE
cg10868817	chr8	106332119	106332120	ZFPM2	23414	971	CGI-S-Shore	FALSE	TRUE	FALSE
cg03184290	chr4	111550666	111550667	PITX2	5308	12611	CGI	FALSE	TRUE	FALSE
cg00745725	chr15	27216288	27216289	GABRG3	2567	-139	CGI	TRUE	FALSE	FALSE
cg02623400	chr1	50513749	50513750	ELAVL4	1996	62	CGI	TRUE	FALSE	FALSE
cg07203423	chr2	74743009	74743010	TLX2	3196	2322	CGI	FALSE	TRUE	FALSE
cg09267051	chr7	100943468	100943469	RABL5	64792	21623	CGI	FALSE	FALSE	TRUE
cg15718066	chr4	169552946	169552947	PALLD	23022	134728	CGI	TRUE	TRUE	FALSE
cg17712694	chr5	16180068	16180069	2011-03-01	441061	-170	CGI	TRUE	FALSE	FALSE
cg17326555	chr1	119535693	119535694	TBX15	6913	-3513	CGI-S-Shore	FALSE	FALSE	TRUE
cg07540103	chr17	6679499	6679500	FBXO39	162517	-51	CGI	TRUE	FALSE	FALSE
cg07091016	chr1	36174005	36174006	C1orf216	127703	10783	CGI-S-Shore	FALSE	FALSE	TRUE
cg06410591	chr19	6741181	6741182	TRIP10	9322	1473	CGI	FALSE	TRUE	FALSE
cg07665387	chr4	134069388	134069389	PCDH10	57575	-1080	CGI	TRUE	TRUE	FALSE
cg24794228	chr19	52391166	52391167	ZNF577	84765	2977	CGI	TRUE	TRUE	FALSE
cg25508319	chr11	128778506	128778507	C11orf45	219833	-2405	CGI-S-Shelf	FALSE	TRUE	FALSE
cg00178249	chr8	77589908	77589909	ZFHX4	79776	-3605	CGI-N-Shore	FALSE	TRUE	FALSE
cg05871694	chr2	177053503	177053504	HOXD-AS1	401022	181	CGI	TRUE	TRUE	FALSE
cg13588023	chr21	43187227	43187228	RIPK4	54101	20	CGI	TRUE	FALSE	FALSE
cg04531704	chr6	27125388	27125389	MIR3143	100422934	9982	CGI	TRUE	FALSE	FALSE
cg00960552	chr1	116380946	116380947	NHLH2	4808	2799	CGI	TRUE	TRUE	FALSE
cg07176264	chr2	120281999	120282000	SCTR	6344	27	CGI	TRUE	FALSE	FALSE
cg25032595	chr13	96204978	96204979	DZIP1	22873	91977	CGI	TRUE	TRUE	FALSE
cg20233073	chr4	54960226	54960227	GSX2	170825	-6020	CGI	FALSE	TRUE	FALSE
cg23016734	chr3	77088563	77088564	ROBO2	6092	1101917	CGI	TRUE	TRUE	FALSE
cg11377136	chr22	46658960	46658961	PKDREJ	10343	257	CGI	TRUE	FALSE	FALSE
cg20985755	chr3	24536474	24536475	THRB	7068	-20	CGI	TRUE	FALSE	FALSE
cg27638126	chr7	15725322	15725323	MEOX2	4223	984	CGI	FALSE	TRUE	FALSE
cg23546474	chr2	223163033	223163034	CCDC140	151278	166	CGI	TRUE	TRUE	FALSE
cg02997982	chr19	41082291	41082292	SHKBP1	92799	-464	CGI	TRUE	TRUE	FALSE
cg12595013	chr3	147128123	147128124	ZIC1	7545	941	CGI	TRUE	FALSE	FALSE
cg25500080	chr5	140346199	140346200	PCDHAC2	56134	451	CGI	TRUE	TRUE	FALSE
cg20698924	chr15	28344730	28344731	OCA2	4948	-271	CGI	TRUE	FALSE	FALSE
cg24775496	chr14	85998576	85998577	FLRT2	23768	2087	CGI	FALSE	TRUE	FALSE
cg02898293	chr20	25061762	25061763	VSX1	30813	1003	CGI-N-Shore	FALSE	TRUE	FALSE
cg17412886	chr5	50678913	50678914	ISL1	3670	-43	CGI	TRUE	FALSE	FALSE
cg23708361	chr7	145813432	145813433	CNTNAP2	26047	-19	CGI	TRUE	FALSE	FALSE
cg07249730	chr17	55362836	55362837	MSI2	124540	29623	Non-CGI	FALSE	TRUE	FALSE
cg23302649	chr14	29243690	29243691	C14orf23	387978	1779	CGI	FALSE	TRUE	FALSE
cg15909981	chr22	37465178	37465179	KCTD17	79734	17398	CGI	FALSE	TRUE	FALSE
cg11873482	chr7	97361244	97361245	TAC1	6863	-25	CGI	TRUE	FALSE	FALSE
cg07703401	chr16	230341	230342	HBQ1	3049	7	CGI	TRUE	FALSE	FALSE
cg16376108	chr16	54967024	54967025	IRX5	10265	1912	CGI	FALSE	TRUE	FALSE
cg26875805	chr1	166890429	166890430	TADA1	117143	-44774	CGI	FALSE	TRUE	FALSE
cg16086620	chr14	93389557	93389558	CHGA	1113	111	CGI	TRUE	FALSE	FALSE
cg23174607	chr6	64281846	64281847	PTP4A1	7803	50194	CGI	TRUE	TRUE	FALSE
cg25755575	chr1	217311531	217311532	ESRRG	2104	-433	CGI	TRUE	FALSE	FALSE
cg10111115	chr3	73674146	73674147	PDZRN3	23024	-73	CGI	TRUE	FALSE	FALSE
cg13176012	chr2	157176971	157176972	NR4A2	4929	12314	CGI	FALSE	FALSE	TRUE
cg09473315	chr17	76228233	76228234	TMEM235	283999	841	CGI	FALSE	TRUE	FALSE
cg20044410	chr4	10463350	10463351	ZNF518B	85460	-4317	CGI	FALSE	FALSE	TRUE
cg05736768	chr8	105479248	105479249	DPYS	1807	27	CGI	TRUE	FALSE	FALSE
cg07157830	chr1	236228741	236228742	NID1	4811	-259	CGI	TRUE	FALSE	FALSE
cg27302539	chr14	54413548	54413549	BMP4	652	10004	CGI	FALSE	FALSE	TRUE
cg18928900	chr6	170605493	170605494	DLL1	28514	-5795	CGI	FALSE	FALSE	TRUE
cg14556303	chr2	217237036	217237037	2004-03-01	57574	-285	CGI	TRUE	FALSE	FALSE
cg18343474	chr1	229566908	229566909	ACTA1	58	2933	CGI-N-Shore	FALSE	FALSE	TRUE
cg25146557	chr2	207507421	207507422	LOC200726	200726	278	CGI	FALSE	TRUE	FALSE
cg04079139	chr1	26735245	26735246	LIN28A	79727	-2022	CGI-N-Shore	FALSE	FALSE	TRUE
cg01026458	chr8	91803805	91803806	TMEM64	169200	52	CGI	TRUE	FALSE	FALSE
cg03531247	chr2	50573485	50573486	NRXN1	9378	686187	CGI-N-Shore	FALSE	TRUE	FALSE
cg10472919	chr5	135266805	135266806	FBXL21	26223	798	CGI-S-Shore	FALSE	TRUE	FALSE
cg09754845	chr7	1408818	1408819	MICALL2	79778	90289	CGI	FALSE	FALSE	TRUE
cg00741900	chr14	102027797	102027798	DIO3	1735	108	CGI	TRUE	FALSE	FALSE
cg22353329	chr17	77814357	77814358	CBX4	8535	-1143	CGI	TRUE	FALSE	FALSE
cg06877762	chr15	56035454	56035455	PRTG	283659	-276	CGI	TRUE	FALSE	FALSE
cg22682811	chr20	21372462	21372463	NKX2-4	644524	5583	CGI	FALSE	FALSE	TRUE
cg21838979	chr2	106681945	106681946	C2orf40	84417	-166	CGI	TRUE	FALSE	FALSE
cg15237494	chr21	28339334	28339335	ADAMTS5	11096	103	CGI	TRUE	FALSE	FALSE
cg13855568	chr4	62066990	62066991	LPHN3	23284	15	CGI	TRUE	FALSE	FALSE
cg11965976	chr5	127874463	127874464	FBN2	2201	-546	CGI	TRUE	FALSE	FALSE
cg26805749	chr11	16627534	16627535	C11orf58	10944	-132612	CGI	TRUE	TRUE	FALSE
cg05350411	chr4	569174	569175	PDE6B	5158	-50187	CGI	FALSE	FALSE	TRUE
cg09354241	chr4	13540850	13540851	NKX3-2	579	5262	CGI	FALSE	FALSE	TRUE
cg24641186	chr6	50804147	50804148	TFAP2B	7021	17707	CGI	FALSE	TRUE	FALSE
cg04418091	chr12	54071168	54071169	ATP5G2	517	-655	CGI	TRUE	FALSE	FALSE
cg12508451	chr15	37172793	37172794	LOC145845	145845	5939	CGI	FALSE	TRUE	FALSE
cg27491887	chr11	2554583	2554584	KCNQ1	3784	88361	CGI	FALSE	TRUE	FALSE
cg03430846	chr8	31497082	31497083	NRG1	3084	170	CGI	TRUE	TRUE	FALSE
cg00373707	chr11	126873379	126873380	KIRREL3	84623	-23	CGI	TRUE	FALSE	FALSE
cg08249988	chr19	19322818	19322819	NCAN	1463	35	CGI	TRUE	FALSE	FALSE
cg26280326	chr5	134708606	134708607	H2AFY	9555	26969	Non-CGI	FALSE	TRUE	FALSE
cg25218716	chr20	22565228	22565229	FOXA2	3170	871	CGI	TRUE	TRUE	FALSE
cg17555373	chr13	53775108	53775109	OLFM4	10562	172231	CGI	FALSE	FALSE	TRUE
cg15135047	chr3	72149514	72149515	LOC201617	201617	-50892	CGI	TRUE	FALSE	FALSE
cg18057109	chr7	156409738	156409739	C7orf13	129790	23608	CGI	FALSE	FALSE	TRUE
cg06697536	chr2	177053496	177053497	HOXD1	3231	188	CGI	TRUE	TRUE	FALSE
cg24136205	chr13	100624293	100624294	ZIC5	85416	-114	CGI	TRUE	FALSE	FALSE
cg24881205	chr7	20826188	20826189	SP8	221833	318	CGI	TRUE	TRUE	FALSE
cg11381539	chr7	71801535	71801536	CALN1	83698	110599	CGI	FALSE	TRUE	FALSE
cg11067179	chr11	66083541	66083542	CD248	57124	972	CGI	TRUE	FALSE	FALSE
cg05945059	chr18	56940463	56940464	RAX	30062	160	CGI	TRUE	FALSE	FALSE
cg02036261	chr14	57276057	57276058	OTX2	5015	1125	CGI	FALSE	TRUE	FALSE
cg03437157	chr6	100052633	100052634	PRDM13	59336	-2015	CGI	FALSE	FALSE	TRUE
cg26931862	chr12	54349169	54349170	HOXC12	3228	454	CGI	TRUE	FALSE	FALSE
cg04343928	chr16	85863576	85863577	COX4I1	1327	30402	CGI-S-Shelf	FALSE	FALSE	TRUE
cg11201710	chr3	192232468	192232469	FGF12	2257	212918	CGI-S-Shore	FALSE	TRUE	FALSE
cg22108563	chr5	176936877	176936878	DOK3	79930	548	CGI-S-Shore	TRUE	TRUE	FALSE
cg08068240	chr11	24518367	24518368	LUZP2	338645	-147	CGI	TRUE	FALSE	FALSE
cg27604416	chr3	157155401	157155402	PTX3	5806	820	CGI	FALSE	TRUE	FALSE
cg16927040	chr3	187388128	187388129	SST	6750	71	CGI	TRUE	FALSE	FALSE
cg12034383	chr7	155250299	155250300	EN2	2020	-523	CGI-S-Shore	TRUE	FALSE	FALSE
cg09659227	chr17	46797291	46797292	PRAC	84366	2589	CGI	FALSE	FALSE	TRUE
cg09896412	chr1	98519101	98519102	MIR137	406928	-7373	CGI	FALSE	FALSE	TRUE
cg12943155	chr3	127347978	127347979	PODXL2	50512	-59	CGI	TRUE	FALSE	FALSE
cg13193239	chr4	111539479	111539480	PITX2	5308	23798	CGI	FALSE	TRUE	FALSE
cg21255438	chr8	70983760	70983761	PRDM14	63978	-197	CGI	TRUE	FALSE	FALSE
cg14631386	chr8	93114305	93114306	RUNX1T1	862	1147	CGI	FALSE	TRUE	FALSE
cg16295725	chr4	10459219	10459220	ZNF518B	85460	-186	CGI	TRUE	FALSE	FALSE
cg05926722	chr14	26674202	26674203	NOVA1	4857	392756	CGI-N-Shore	FALSE	FALSE	TRUE
cg26558485	chr1	47489282	47489283	CYP4Z1	199974	-43876	CGI	TRUE	TRUE	FALSE
cg27209578	chr2	175193470	175193471	LOC285084	285084	2714	CGI	FALSE	TRUE	FALSE
cg01693026	chr14	102026953	102026954	MIR1247	100302145	-193	CGI	TRUE	FALSE	FALSE
cg08214995	chr16	22826243	22826244	HS3ST2	9956	382	CGI	TRUE	FALSE	FALSE
cg07552707	chr20	44519093	44519094	CTSA	5476	-496	CGI	TRUE	FALSE	FALSE
cg14871932	chr7	44185323	44185324	MYL7	58498	-4406	CGI	FALSE	TRUE	FALSE
cg18530551	chr5	172670879	172670880	NKX2-5	1482	-8563	CGI	FALSE	FALSE	TRUE
cg09021626	chr2	40679076	40679077	SLC8A1	6546	60497	CGI	TRUE	TRUE	FALSE
cg16498194	chr12	130647874	130647875	FZD10	11211	869	CGI	TRUE	FALSE	FALSE
cg26578682	chr5	2750163	2750164	IRX2	153572	1604	CGI	FALSE	TRUE	FALSE
cg18044383	chr18	59001158	59001159	CDH20	28316	169	CGI	FALSE	TRUE	FALSE
cg26351229	chr8	132053780	132053781	ADCY8	114	-944	CGI	TRUE	FALSE	FALSE
cg14306451	chr5	17218778	17218779	BASP1	10409	1027	CGI	TRUE	TRUE	FALSE
cg03340466	chr1	179712740	179712741	FAM163A	148753	15824	CGI	FALSE	TRUE	FALSE
cg18733255	chr17	39942970	39942971	JUP	3728	-5	CGI	TRUE	FALSE	FALSE
cg04567445	chr1	65730409	65730410	DNAJC6	9829	10260	CGI-N-Shore	TRUE	TRUE	FALSE
cg27110994	chr4	157892489	157892490	PDGFC	56034	55	CGI	TRUE	FALSE	FALSE
cg26060489	chr6	1604990	1604991	FOXC1	2296	-5689	CGI	FALSE	FALSE	TRUE
cg13107760	chr2	185463209	185463210	ZNF804A	91752	115	CGI-S-Shore	TRUE	FALSE	FALSE
cg22855933	chr2	157179512	157179513	NR4A2	4929	9773	CGI	FALSE	FALSE	TRUE
cg13448753	chr10	25464059	25464060	GPR158	57512	-229	CGI	TRUE	TRUE	FALSE
cg17784403	chr6	94128527	94128528	EPHA7	2045	771	CGI	FALSE	TRUE	FALSE
cg25174438	chr4	85403915	85403916	NKX6-1	4825	15470	CGI	FALSE	FALSE	TRUE
cg26008365	chr1	153958797	153958798	RAB13	5872	7	CGI	TRUE	FALSE	FALSE
cg23881278	chr11	113346299	113346300	DRD2	1813	112	CGI	TRUE	TRUE	FALSE
cg13570972	chr11	31839632	31839633	PAX6	5080	-122	CGI	TRUE	TRUE	FALSE
cg14168923	chr13	28366606	28366607	GSX1	219409	-172	CGI	TRUE	FALSE	FALSE
cg00144180	chr2	240294362	240294363	MIR2467	100616360	-20862	CGI-S-Shore	FALSE	TRUE	FALSE
cg19796273	chr5	16936868	16936869	MYO10	4651	-482	CGI	TRUE	FALSE	FALSE
cg04609350	chr10	94833102	94833103	CYP26A1	1592	-128	CGI	TRUE	FALSE	FALSE
cg02051239	chr2	74375507	74375508	BOLA3-AS1	100507171	398	CGI	TRUE	TRUE	FALSE
cg21512644	chr4	156130016	156130017	NPY2R	4887	234	CGI	TRUE	FALSE	FALSE
cg09601175	chr2	177025608	177025609	HOXD3	3232	-3195	CGI	FALSE	FALSE	TRUE
cg18115040	chr2	176981328	176981329	HOXD10	3236	-162	CGI	TRUE	FALSE	FALSE
cg04969688	chr15	30114816	30114817	TJP1	7082	-109	CGI	TRUE	FALSE	FALSE
cg02923706	chr14	38057472	38057473	FOXA1	3169	7015	CGI	FALSE	FALSE	TRUE
cg01150683	chr10	111216646	111216647	XPNPEP1	7511	466663	CGI	FALSE	FALSE	TRUE
cg09614415	chr10	129535509	129535510	FOXI2	399823	-27	CGI	TRUE	FALSE	FALSE
cg01867395	chr11	31839628	31839629	PAX6	5080	-118	CGI	TRUE	TRUE	FALSE
cg07647164	chr1	214360690	214360691	SMYD2	56950	-93873	CGI	FALSE	FALSE	TRUE
cg07862554	chr3	154797083	154797084	MME	4311	55169	CGI	TRUE	TRUE	FALSE
cg25571189	chr2	133427612	133427613	LYPD1	116372	1456	CGI	TRUE	TRUE	FALSE
cg22105145	chr18	5196397	5196398	C18orf42	642597	856	CGI	FALSE	TRUE	FALSE
cg22752008	chr2	228029457	228029458	COL4A3	1285	175	CGI	TRUE	FALSE	FALSE
cg11204212	chr8	95651218	95651219	LOC100288748	100288748	475	CGI-N-Shore	TRUE	FALSE	FALSE
cg24369989	chr15	78933807	78933808	CHRNB4	1143	19065	CGI	TRUE	TRUE	FALSE
cg07915921	chr12	54321502	54321503	HOXC13	3229	-11072	CGI	FALSE	FALSE	TRUE
cg04427498	chr7	20830657	20830658	SP8	221833	-4148	CGI	FALSE	FALSE	TRUE
cg00792966	chr6	21595983	21595984	SOX4	6659	2010	CGI	TRUE	FALSE	FALSE
cg16997364	chr19	39755575	39755576	IFNL2	282616	-3580	CGI	FALSE	FALSE	TRUE
cg07516252	chr14	24641201	24641202	REC8	9985	-31	CGI	TRUE	FALSE	FALSE
cg05769169	chr14	34419832	34419833	EGLN3	112399	450	CGI	TRUE	TRUE	FALSE
cg15092343	chr4	4860061	4860062	MSX1	4487	-1329	CGI	TRUE	FALSE	FALSE
cg18311537	chr7	27209195	27209196	MIR196B	442920	-12	CGI-S-Shore	TRUE	TRUE	FALSE
cg25970832	chr18	28621651	28621652	DSC3	1825	1128	CGI	FALSE	TRUE	FALSE
cg05637536	chr1	154475068	154475069	TDRD10	126668	372	CGI	TRUE	FALSE	FALSE
cg01916333	chr5	121647634	121647635	SNCAIP	9627	247	CGI	TRUE	TRUE	FALSE
cg11831238	chr11	20182021	20182022	DBX1	120237	-150	CGI	TRUE	FALSE	FALSE
cg09321400	chr16	55690443	55690444	SLC6A2	6530	900	CGI	TRUE	TRUE	FALSE
cg00688962	chr4	21950567	21950568	KCNIP4	80333	-192	CGI	TRUE	FALSE	FALSE
cg06812991	chr4	156129574	156129575	NPY2R	4887	-205	CGI	TRUE	FALSE	FALSE
cg10721149	chr6	25652405	25652406	SCGN	10590	-22	CGI	TRUE	FALSE	FALSE
cg07851675	chr5	2755540	2755541	C5orf38	153571	3277	CGI-S-Shore	FALSE	FALSE	TRUE
cg15912800	chr7	27209197	27209198	MIR196B	442920	-14	CGI-S-Shore	TRUE	TRUE	FALSE
cg22410057	chr15	90456248	90456249	C15orf38-AP3S2	100526783	-25	CGI	TRUE	FALSE	FALSE
cg10640944	chr5	102201890	102201891	PAM	5066	362	CGI	TRUE	FALSE	FALSE
cg01492538	chr7	2774543	2774544	AMZ1	155185	55379	CGI	FALSE	TRUE	FALSE
cg01860328	chr5	94620959	94620960	MCTP1	79772	-679	CGI	TRUE	FALSE	FALSE
cg14186066	chr14	60976115	60976116	SIX6	4990	176	CGI	TRUE	FALSE	FALSE
cg07721203	chr15	58357922	58357923	AQP9	366	-72471	CGI	TRUE	TRUE	FALSE
cg14020846	chr14	103674272	103674273	LINC00605	100131366	-18906	CGI	FALSE	FALSE	TRUE
cg08832220	chr3	55516184	55516185	WNT5A	7474	5145	CGI	TRUE	TRUE	FALSE
cg12764034	chr1	75602846	75602847	LHX8	431707	8726	CGI	TRUE	TRUE	FALSE
cg10401879	chr10	83634276	83634277	NRG3	10718	-792	CGI	TRUE	FALSE	FALSE
cg04290346	chr11	20177852	20177853	DBX1	120237	4016	CGI	FALSE	TRUE	FALSE
cg00399483	chr18	49868378	49868379	DCC	1630	1835	CGI	FALSE	TRUE	FALSE
cg22746058	chr10	23481176	23481177	PTF1A	256297	-282	CGI	TRUE	FALSE	FALSE
cg15109018	chr12	85862615	85862616	ALX1	8092	188578	Non-CGI	FALSE	FALSE	TRUE
cg20300246	chr9	139096747	139096748	LHX3	8022	206	CGI	TRUE	TRUE	FALSE
cg08572611	chr7	100253914	100253915	ACTL6B	51412	168	CGI	TRUE	TRUE	FALSE
cg13381486	chr2	131513632	131513633	AMER3	205147	554	CGI	TRUE	TRUE	FALSE
cg14603345	chr20	11871375	11871376	BTBD3	22903	-100	CGI	TRUE	FALSE	FALSE
cg26422458	chr1	79472452	79472453	ELTD1	64123	41	CGI	TRUE	FALSE	FALSE
cg18299578	chr14	29235928	29235929	FOXG1	2290	-357	CGI-S-Shore	TRUE	FALSE	FALSE
cg20979799	chr6	117198560	117198561	RFX6	222546	183	CGI	TRUE	FALSE	FALSE
cg13887205	chr5	139525946	139525947	IGIP	492311	20424	CGI	FALSE	FALSE	TRUE
cg00006081	chr10	124908907	124908908	HMX2	3167	1268	CGI-S-Shore	FALSE	TRUE	FALSE
cg08039301	chr17	47072907	47072908	IGF2BP1	10642	-1865	CGI	TRUE	FALSE	FALSE
cg20906291	chr6	10382103	10382104	LOC100130275	100130275	-30446	CGI	FALSE	FALSE	TRUE
cg22655696	chr10	131757191	131757192	EBF3	253738	4898	CGI	FALSE	TRUE	FALSE
cg14156751	chr10	50976571	50976572	OGDHL	55753	-6145	CGI	FALSE	FALSE	TRUE
cg17457560	chr8	32405851	32405852	NRG1	3084	908939	CGI	TRUE	TRUE	FALSE
cg20130213	chr10	13934169	13934170	PRPF18	8559	305229	CGI	FALSE	TRUE	FALSE
cg21325154	chr4	141490354	141490355	UCP1	7350	-394	CGI	TRUE	FALSE	FALSE
cg27176138	chr13	96743087	96743088	HS6ST3	266722	-4	CGI	TRUE	FALSE	FALSE
cg04499648	chr11	17740887	17740888	MYOD1	4654	-221	CGI	TRUE	FALSE	FALSE
cg23328622	chr20	10199302	10199303	SNAP25	6616	-173	CGI	TRUE	TRUE	FALSE
cg11931116	chr10	54074040	54074041	DKK1	22943	0	CGI	TRUE	FALSE	FALSE
cg00565688	chr1	3568212	3568213	TP73	7161	-915	CGI	TRUE	FALSE	FALSE
cg18087306	chr19	2446487	2446488	LMNB2	84823	10469	CGI-S-Shore	FALSE	TRUE	FALSE
cg24719321	chr11	122850490	122850491	BSX	390259	1887	CGI-S-Shore	FALSE	TRUE	FALSE
cg26296488	chr4	9783192	9783193	DRD5	1816	-64	CGI	TRUE	FALSE	FALSE
cg26088662	chr5	159399005	159399006	TTC1	7265	-37173	CGI	FALSE	TRUE	FALSE
cg07689396	chr7	633050	633051	FLJ44511	441307	73021	CGI	FALSE	TRUE	FALSE
cg03190219	chr7	25898688	25898689	MIR148A	406940	90916	CGI	FALSE	FALSE	TRUE
cg24275315	chr4	85417312	85417313	NKX6-1	4825	2073	CGI	FALSE	TRUE	FALSE
cg19049194	chr2	175193754	175193755	LOC285084	285084	2998	CGI	FALSE	TRUE	FALSE
cg14951598	chr6	41472931	41472932	FOXP4	116113	-41231	CGI	FALSE	TRUE	FALSE
cg24221648	chr13	79170283	79170284	POU4F1	5457	7410	CGI	FALSE	TRUE	FALSE
cg05329692	chr10	102891280	102891281	TLX1	3195	218	CGI	TRUE	FALSE	FALSE
cg09543255	chr3	170302640	170302641	SLC7A14	57709	1221	CGI	FALSE	TRUE	FALSE
cg25302957	chr6	17282284	17282285	RBM24	221662	474	CGI	TRUE	TRUE	FALSE
cg09858188	chr7	156814480	156814481	LOC645249	645249	10928	CGI	FALSE	FALSE	TRUE
cg11148130	chr3	73674068	73674069	PDZRN3	23024	2	CGI	TRUE	FALSE	FALSE
cg22353551	chr1	156357839	156357840	RHBG	57127	18835	CGI-N-Shore	FALSE	FALSE	TRUE
cg25033990	chr17	32484014	32484015	ASIC2	40	-188	CGI	TRUE	FALSE	FALSE
cg04733537	chr12	130388748	130388749	TMEM132D	121256	-535	CGI	TRUE	FALSE	FALSE
cg07552803	chr8	24771326	24771327	NEFM	4741	51	CGI	TRUE	FALSE	FALSE
cg15873149	chr3	147137180	147137181	ZIC1	7545	9998	CGI	FALSE	FALSE	TRUE
cg03623878	chr13	113655560	113655561	MCF2L-AS1	100289410	-32607	CGI-S-Shore	TRUE	TRUE	FALSE
cg19843036	chr4	159131516	159131517	TMEM144	55314	114	CGI-N-Shore	TRUE	FALSE	FALSE
cg07758738	chr18	12911528	12911529	PTPN2	5771	-27193	CGI	FALSE	FALSE	TRUE
cg09765089	chr7	27291346	27291347	EVX1	2128	9181	CGI	FALSE	FALSE	TRUE
cg23847712	chr4	9783196	9783197	DRD5	1816	-60	CGI	TRUE	FALSE	FALSE
cg07973435	chr6	100905458	100905459	SIM1	6492	7345	CGI	FALSE	TRUE	FALSE
cg17285225	chr3	8811004	8811005	OXTR	5021	294	CGI	TRUE	FALSE	FALSE
cg09969277	chr15	89922328	89922329	LOC254559	254559	10997	CGI	FALSE	TRUE	FALSE
cg02409351	chr12	85674022	85674023	ALX1	8092	-12	CGI	TRUE	FALSE	FALSE
cg19721889	chr5	153857789	153857790	HAND1	9421	33	CGI	TRUE	FALSE	FALSE
cg23244289	chr5	79331135	79331136	THBS4	7060	-33	CGI	TRUE	FALSE	FALSE
cg15285250	chr7	8482107	8482108	NXPH1	30010	8521	CGI	FALSE	TRUE	FALSE
cg18425434	chr10	118429648	118429649	C10orf82	143379	125	CGI	TRUE	FALSE	FALSE
cg25788549	chr7	150786044	150786045	AGAP3	116988	3089	CGI-S-Shore	FALSE	TRUE	FALSE
cg13673164	chr1	110009509	110009510	SYPL2	284612	408	CGI	TRUE	FALSE	FALSE
cg18347010	chr17	55888532	55888533	MRPS23	51649	38899	CGI	FALSE	FALSE	TRUE
cg12951849	chr18	11148932	11148933	PIEZO2	63895	-170	CGI	TRUE	FALSE	FALSE
cg22374057	chr18	11148682	11148683	PIEZO2	63895	77	CGI	TRUE	FALSE	FALSE
cg18573383	chr12	75603401	75603402	KCNC2	3747	108	CGI-S-Shore	TRUE	FALSE	FALSE
cg18437365	chr13	112717484	112717485	SOX1	6656	-4427	CGI	FALSE	FALSE	TRUE
cg23984434	chr11	106888656	106888657	GUCY1A2	2977	513	CGI	TRUE	FALSE	FALSE
cg12452298	chr15	67134587	67134588	SMAD6	4091	139912	CGI	FALSE	FALSE	TRUE
cg24054190	chr3	192232863	192232864	FGF12	2257	212523	CGI	FALSE	TRUE	FALSE
cg07883457	chr6	58147897	58147898	GUSBP4	375513	139825	CGI	TRUE	FALSE	FALSE
cg18679410	chr3	26664308	26664309	LRRC3B	116135	7	CGI	TRUE	FALSE	FALSE
cg17497271	chr15	40212781	40212782	GPR176	11245	310	CGI	TRUE	FALSE	FALSE
cg14676407	chr10	125651370	125651371	CPXM2	119587	48407	CGI	TRUE	TRUE	FALSE
cg17656260	chr19	37329666	37329667	ZNF345	25850	-11592	CGI	TRUE	TRUE	FALSE
cg17486097	chr8	35093411	35093412	UNC5D	137970	435	CGI	FALSE	TRUE	FALSE
cg16969368	chr17	57642752	57642753	DHX40	79665	-132	CGI-N-Shore	TRUE	FALSE	FALSE
cg03810428	chr12	103218441	103218442	LINC00485	283432	-263	CGI	TRUE	FALSE	FALSE
cg14348397	chr9	109623731	109623732	ZNF462	58499	-1645	CGI	TRUE	FALSE	FALSE
cg26669806	chr19	18899483	18899484	COMP	1311	2629	CGI	FALSE	TRUE	FALSE
cg10182317	chr6	123317487	123317488	CLVS2	134829	-93	CGI	TRUE	FALSE	FALSE
cg02243785	chr1	82267931	82267932	LPHN2	23266	496085	CGI	FALSE	TRUE	FALSE
cg02093112	chr17	6679495	6679496	FBXO39	162517	-55	CGI	TRUE	FALSE	FALSE
cg22348673	chr7	28997925	28997926	LOC100506497	100506497	-21656	CGI	TRUE	FALSE	FALSE
cg01097384	chr11	1358675	1358676	LOC255512	255512	27736	CGI	FALSE	FALSE	TRUE
cg22322465	chr4	174459201	174459202	NBLA00301	79804	7591	CGI	FALSE	TRUE	FALSE
cg25345178	chr8	72459908	72459909	EYA1	2138	-185440	CGI	TRUE	FALSE	FALSE
cg21924449	chr15	33011441	33011442	GREM1	26585	1235	CGI	TRUE	TRUE	FALSE
cg24633978	chr2	176972581	176972582	HOXD11	3237	3330	CGI	TRUE	TRUE	FALSE
cg06346974	chr1	65775059	65775060	DNAJC6	9829	54910	CGI	TRUE	TRUE	FALSE
cg04528038	chr16	21171097	21171098	DNAH3	55567	-334	CGI-S-Shore	TRUE	TRUE	FALSE
cg22685409	chr11	30038692	30038693	KCNA4	3739	-114	CGI	TRUE	FALSE	FALSE
cg04115680	chr7	75889229	75889230	HSPB1	3315	-42644	CGI	FALSE	TRUE	FALSE
cg07190535	chr5	59189843	59189844	PART1	25859	-593695	CGI	TRUE	TRUE	FALSE
cg22070406	chr18	55019708	55019709	ST8SIA3	51046	-11	CGI	TRUE	FALSE	FALSE
cg24189904	chr19	9473781	9473782	ZNF177	7730	84	CGI	FALSE	TRUE	FALSE
cg16226962	chr6	10415687	10415688	LOC100130275	100130275	3135	CGI	TRUE	TRUE	FALSE
cg01138839	chr1	113256886	113256887	PPM1J	333926	1062	CGI-N-Shore	TRUE	TRUE	FALSE
cg20457796	chr10	50819500	50819501	SLC18A3	6572	1152	CGI	TRUE	TRUE	FALSE
cg25756780	chr2	121345047	121345048	LOC84931	84931	-121121	CGI	FALSE	FALSE	TRUE
cg04965050	chr22	43739790	43739791	SCUBE1	80274	-395	CGI	TRUE	FALSE	FALSE
cg27526665	chr3	24537050	24537051	THRB	7068	-596	CGI	TRUE	FALSE	FALSE
cg03160135	chr6	117586918	117586919	VGLL2	245806	196	CGI	TRUE	FALSE	FALSE
cg25557835	chr8	17354715	17354716	SLC7A2	6542	117	CGI	TRUE	FALSE	FALSE
cg08526991	chr2	5831394	5831395	SOX11	6664	-1403	CGI	TRUE	FALSE	FALSE
cg08622677	chr12	3601306	3601307	PRMT8	56341	110790	CGI	FALSE	TRUE	FALSE
cg03893271	chr7	70597458	70597459	WBSCR17	64409	-329	CGI	TRUE	FALSE	FALSE
cg02816816	chr4	17783356	17783357	FAM184B	27146	-220	CGI	TRUE	FALSE	FALSE
cg20676716	chr2	177053568	177053569	HOXD-AS1	401022	116	CGI	TRUE	FALSE	FALSE
cg23267759	chr18	19751335	19751336	GATA6	2627	1918	CGI	TRUE	TRUE	FALSE
cg20359994	chr6	27599141	27599142	LOC100507173	100507173	-62671	CGI	TRUE	FALSE	FALSE
cg05099387	chr2	177053292	177053293	HOXD1	3231	-13	CGI	TRUE	TRUE	FALSE
cg23668184	chr2	5836713	5836714	SOX11	6664	3913	CGI	TRUE	FALSE	FALSE
cg01315916	chr5	3591609	3591610	IRX1	79192	-4557	CGI	FALSE	FALSE	TRUE
cg06558014	chr6	100051116	100051117	PRDM13	59336	-3532	CGI	FALSE	FALSE	TRUE
cg17152981	chr6	110299835	110299836	GPR6	2830	-461	CGI-S-Shore	TRUE	TRUE	FALSE
cg23027580	chr8	67089513	67089514	CRH	1392	1331	CGI	TRUE	TRUE	FALSE
cg07617338	chr2	63285846	63285847	OTX1	5013	8653	CGI	FALSE	FALSE	TRUE
cg21415530	chr8	140715802	140715803	KCNK9	51305	-502	CGI	TRUE	FALSE	FALSE
cg14328457	chr17	37381475	37381476	STAC2	342667	563	CGI	FALSE	TRUE	FALSE
cg20300343	chr1	149719461	149719462	FCGR1A	2209	-34787	CGI	TRUE	FALSE	FALSE
cg15045441	chr6	72130432	72130433	LINC00472	79940	14	CGI	TRUE	FALSE	FALSE
cg23142799	chr13	26625089	26625090	SHISA2	387914	107	CGI	TRUE	FALSE	FALSE
cg06401019	chr5	92957098	92957099	MIR2277	100313887	-603	CGI	TRUE	TRUE	FALSE
cg15916004	chr11	65816646	65816647	GAL3ST3	89792	3	CGI	TRUE	FALSE	FALSE
cg14171486	chr1	155139557	155139558	TRIM46	80128	-5862	Non-CGI	FALSE	FALSE	TRUE
cg07098391	chr4	55991418	55991419	KDR	3791	342	CGI	TRUE	FALSE	FALSE
cg11469098	chr8	49647809	49647810	EFCAB1	79645	59	CGI	TRUE	FALSE	FALSE
cg18297196	chr6	41168941	41168942	TREML2	79865	-15	Non-CGI	TRUE	FALSE	FALSE
cg13895765	chr2	66803345	66803346	MEIS1	4211	140812	CGI	FALSE	FALSE	TRUE
cg02318971	chr11	64739714	64739715	C11orf85	283129	-156	CGI	TRUE	FALSE	FALSE
cg21829923	chr2	171573891	171573892	SP5	389058	2033	CGI	FALSE	TRUE	FALSE
cg03927133	chr15	41794293	41794294	ITPKA	3706	8236	CGI	FALSE	TRUE	FALSE
cg22796507	chr1	47882739	47882740	FOXE3	2301	994	CGI	TRUE	FALSE	FALSE
cg24880701	chr15	68121563	68121564	SKOR1	390598	3621	CGI	FALSE	TRUE	FALSE
cg20294789	chr1	151513456	151513457	TUFT1	7286	674	CGI	FALSE	TRUE	FALSE
cg04837832	chr10	101290958	101290959	NKX2-3	159296	-1730	CGI	TRUE	FALSE	FALSE
cg14619259	chr5	141705539	141705540	SPRY4	81848	-918	CGI	TRUE	FALSE	FALSE
cg18337222	chr3	99595254	99595255	CMSS1	84319	58575	CGI	TRUE	TRUE	FALSE
cg07271264	chr11	17740977	17740978	MYOD1	4654	-131	CGI	TRUE	FALSE	FALSE
cg12836959	chr3	147098568	147098569	ZIC4	84107	26026	CGI	FALSE	FALSE	TRUE
cg11006267	chr5	139017424	139017425	CXXC5	51523	-10875	CGI	FALSE	FALSE	TRUE
cg03943218	chr10	102419600	102419601	PAX2	5076	-85866	CGI-S-Shore	FALSE	FALSE	TRUE
cg07737781	chr7	73038866	73038867	MLXIPL	51085	2	CGI	TRUE	FALSE	FALSE
cg18026631	chr8	23584746	23584747	NKX2-6	137814	-20634	CGI	FALSE	FALSE	TRUE
cg03306221	chr22	44258602	44258603	SULT4A1	25830	-223	CGI	TRUE	FALSE	FALSE
cg16587616	chr6	62996022	62996023	KHDRBS2	202559	76	CGI	TRUE	FALSE	FALSE
cg06552356	chr12	85674531	85674532	ALX1	8092	494	CGI	FALSE	TRUE	FALSE
cg06065125	chr4	85402870	85402871	NKX6-1	4825	16515	CGI	FALSE	FALSE	TRUE
cg04617948	chr10	129535138	129535139	FOXI2	399823	-398	CGI	TRUE	FALSE	FALSE
cg11463271	chr5	176936892	176936893	DOK3	79930	533	CGI-S-Shore	TRUE	TRUE	FALSE
cg06809544	chr7	79081666	79081667	MAGI2-AS3	100505881	-605	CGI	TRUE	TRUE	FALSE
cg22605415	chr4	175135997	175135998	CEP44	80817	-68829	CGI	FALSE	TRUE	FALSE
cg20677901	chr1	3568210	3568211	TP73	7161	-917	CGI	TRUE	FALSE	FALSE
cg08441806	chr10	134599149	134599150	NKX6-2	84504	386	CGI	TRUE	FALSE	FALSE
cg03220633	chr5	92957400	92957401	MIR2277	100313887	-905	CGI	TRUE	TRUE	FALSE
cg12071888	chr1	91195159	91195160	BARHL2	343472	-12364	CGI	FALSE	FALSE	TRUE
cg07639489	chr4	174459743	174459744	NBLA00301	79804	8133	CGI	FALSE	TRUE	FALSE
cg22127570	chr4	174443366	174443367	HAND2	9464	8010	CGI	FALSE	FALSE	TRUE
cg03957108	chr2	63276545	63276546	OTX1	5013	-645	CGI-S-Shore	TRUE	FALSE	FALSE
cg04326854	chr6	166075453	166075454	PDE10A	10846	133	CGI	TRUE	FALSE	FALSE
cg00381131	chr4	154073616	154073617	TRIM2	23321	-652	CGI-S-Shore	TRUE	FALSE	FALSE
cg26654286	chr17	38465510	38465511	RARA	5914	86	Non-CGI	TRUE	FALSE	FALSE
cg03562414	chr19	52391078	52391079	ZNF577	84765	3065	CGI	TRUE	TRUE	FALSE
cg26056703	chr15	95870321	95870322	LOC400456	400456	6	CGI	TRUE	FALSE	FALSE
cg18969232	chr2	45156937	45156938	SIX3	6496	-12098	CGI	FALSE	FALSE	TRUE
cg07558287	chr3	127347884	127347885	PODXL2	50512	-153	CGI	TRUE	FALSE	FALSE
cg23740491	chr6	27228267	27228268	PRSS16	10279	12764	CGI	FALSE	FALSE	TRUE
cg21657577	chr19	52956622	52956623	ZNF578	147660	-205	CGI-S-Shore	TRUE	FALSE	FALSE
cg09492887	chr7	103085978	103085979	SLC26A5	375611	644	CGI	FALSE	TRUE	FALSE
cg05942459	chr6	101846805	101846806	GRIK2	2898	135	CGI	TRUE	TRUE	FALSE
cg17816908	chr8	41167109	41167110	SFRP1	6422	-118	CGI	TRUE	FALSE	FALSE
cg17954152	chr1	214160860	214160861	PROX1	5629	-424	CGI	TRUE	FALSE	FALSE
cg02388882	chr10	88731631	88731632	AGAP11	119385	1132	CGI-S-Shore	TRUE	TRUE	FALSE
cg17828689	chr3	136539113	136539114	SLC35G2	80723	1251	CGI	FALSE	TRUE	FALSE
cg07314829	chr1	112058397	112058398	RAP1A	5906	-26656	CGI	FALSE	TRUE	FALSE
cg04859466	chr3	181444563	181444564	SOX2	6657	14850	CGI	FALSE	TRUE	FALSE
cg17412248	chr20	44803411	44803412	CD40	958	56504	CGI	FALSE	TRUE	FALSE
cg00034076	chr8	85096037	85096038	RALYL	138046	583	CGI	TRUE	TRUE	FALSE
cg03171770	chr10	43393728	43393729	BMS1	9790	115773	CGI	FALSE	FALSE	TRUE
cg03335216	chr1	8086776	8086777	ERRFI1	54206	-382	CGI	TRUE	FALSE	FALSE
cg06027843	chr10	102440894	102440895	PAX2	5076	-64572	CGI	FALSE	FALSE	TRUE
cg03450948	chr2	177053274	177053275	HOXD1	3231	-31	CGI	TRUE	TRUE	FALSE
cg21154627	chr3	170303190	170303191	SLC7A14	57709	671	CGI	FALSE	TRUE	FALSE
cg19156483	chr2	164592571	164592572	FIGN	55137	-57	CGI	TRUE	FALSE	FALSE
cg19822251	chr3	9595395	9595396	LHFPL4	375323	89	CGI	TRUE	FALSE	FALSE
cg03790250	chr4	20256326	20256327	SLIT2	9353	1090	CGI	FALSE	TRUE	FALSE
cg14146100	chr4	134069236	134069237	PCDH10	57575	-1232	CGI	TRUE	TRUE	FALSE
cg00310215	chr16	51185346	51185347	SALL1	6299	-162	CGI-S-Shore	TRUE	FALSE	FALSE
cg24309428	chr11	89224381	89224382	NOX4	50507	98396	CGI-N-Shore	TRUE	TRUE	FALSE
cg19619405	chr12	43945892	43945893	ADAMTS20	80070	-167	CGI	TRUE	FALSE	FALSE
cg12212311	chr18	77558916	77558917	KCNG2	26251	-64750	CGI	FALSE	FALSE	TRUE
cg12188986	chr11	93063886	93063887	CCDC67	159989	729	CGI	TRUE	TRUE	FALSE
cg02722188	chr4	55099058	55099059	GSX2	170825	132809	CGI-S-Shore	FALSE	TRUE	FALSE
cg04837025	chr1	236228744	236228745	NID1	4811	-262	CGI	TRUE	FALSE	FALSE
cg20687242	chr12	54653427	54653428	CBX5	23468	20486	Non-CGI	TRUE	TRUE	FALSE
cg26116485	chr3	55515411	55515412	WNT5A	7474	5918	CGI	TRUE	TRUE	FALSE
cg15916399	chr18	67068457	67068458	DOK6	220164	172	CGI	TRUE	FALSE	FALSE
cg23037403	chr5	178368183	178368184	ZNF454	285676	-9	CGI	TRUE	FALSE	FALSE
cg12610471	chr10	22634199	22634200	SPAG6	9576	-173	CGI	TRUE	FALSE	FALSE
cg00044245	chr6	94128889	94128890	EPHA7	2045	409	CGI	FALSE	TRUE	FALSE
cg06594404	chr4	380396	380397	ZNF141	7700	48799	CGI	FALSE	FALSE	TRUE
cg21834207	chr1	50489827	50489828	AGBL4	84871	-200	CGI	TRUE	FALSE	FALSE
cg07060233	chr20	44687092	44687093	NCOA5	57727	31486	CGI	FALSE	TRUE	FALSE
cg02281208	chr15	27216008	27216009	GABRG3	2567	-419	CGI	TRUE	FALSE	FALSE
cg00107187	chr14	105070998	105070999	TMEM179	388021	97	CGI	TRUE	FALSE	FALSE
cg10966580	chr4	6223973	6223974	LOC285484	285484	21512	CGI	FALSE	TRUE	FALSE
cg12926938	chr8	93114150	93114151	RUNX1T1	862	1302	CGI	FALSE	TRUE	FALSE
cg17302155	chr6	100061111	100061112	PRDM13	59336	6460	CGI	FALSE	TRUE	FALSE
cg08085954	chr3	154797399	154797400	MME	4311	55485	CGI	TRUE	TRUE	FALSE
cg26248284	chr4	41362853	41362854	LIMCH1	22998	48	CGI	TRUE	FALSE	FALSE
cg08204702	chr5	59189849	59189850	PART1	25859	-593689	CGI	TRUE	TRUE	FALSE
cg19651694	chr11	71955164	71955165	PHOX2A	401	54	CGI	TRUE	FALSE	FALSE
cg10022788	chr19	3136019	3136020	GNA15	2769	-170	CGI-N-Shore	TRUE	FALSE	FALSE
cg02519751	chr3	147126753	147126754	ZIC1	7545	-426	CGI	TRUE	FALSE	FALSE
cg10836101	chr19	30020886	30020887	VSTM2B	342865	3394	CGI	FALSE	TRUE	FALSE
cg27020216	chr3	153840347	153840348	ARHGEF26-AS1	100507524	-1347	CGI	TRUE	TRUE	FALSE
cg21004042	chr1	70033902	70033903	LRRC7	57554	1033	CGI	TRUE	FALSE	FALSE
cg17816394	chr1	235814009	235814010	GNG4	2786	43	CGI	TRUE	FALSE	FALSE
cg17444738	chr4	85417969	85417970	NKX6-1	4825	1416	CGI	FALSE	TRUE	FALSE
cg15296767	chr11	64122743	64122744	RPS6KA4	8986	-3880	CGI-S-Shore	FALSE	TRUE	FALSE
cg13161658	chr11	30038797	30038798	KCNA4	3739	-219	CGI	TRUE	FALSE	FALSE
cg24869601	chr6	10414350	10414351	LOC100130275	100130275	1798	CGI	TRUE	TRUE	FALSE
cg11743349	chr4	21950864	21950865	KCNIP4	80333	-489	CGI	TRUE	FALSE	FALSE
cg03881775	chr3	147111135	147111136	ZIC4	84107	13459	CGI	TRUE	TRUE	FALSE
cg07312701	chr13	46189883	46189884	FAM194B	220081	-8	CGI	TRUE	FALSE	FALSE
cg15310492	chr11	30038677	30038678	KCNA4	3739	-99	CGI	TRUE	FALSE	FALSE
cg27262412	chr1	119530702	119530703	TBX15	6913	1475	CGI	FALSE	TRUE	FALSE
cg03699182	chr2	121104187	121104188	INHBB	3625	467	CGI	TRUE	FALSE	FALSE
cg01692233	chr18	76738717	76738718	SALL3	27164	-1556	CGI-S-Shore	TRUE	FALSE	FALSE
cg18609078	chr4	13538807	13538808	LOC285547	285547	-5765	CGI	FALSE	FALSE	TRUE
cg20974724	chr7	121944450	121944451	FEZF1	389549	113	CGI	TRUE	TRUE	FALSE
cg10948929	chr7	121513695	121513696	PTPRZ1	5803	535	CGI	FALSE	TRUE	FALSE
cg06000883	chr21	39288720	39288721	KCNJ6	3763	-23	CGI-S-Shore	TRUE	FALSE	FALSE
cg03900143	chr3	147111660	147111661	ZIC4	84107	12934	CGI	TRUE	TRUE	FALSE
cg18521914	chr10	50887566	50887567	C10orf53	282966	-116	CGI	TRUE	TRUE	FALSE
cg13078140	chr4	20255082	20255083	SLIT2	9353	-151	CGI	TRUE	FALSE	FALSE
cg21355828	chr7	149389814	149389815	KRBA1	84626	-22286	CGI	TRUE	FALSE	FALSE
cg12935170	chr7	23508189	23508190	IGF2BP3	10643	1804	CGI	FALSE	TRUE	FALSE
cg13826452	chr6	26758395	26758396	ZNF322	79692	-98414	CGI	FALSE	FALSE	TRUE
cg23521835	chr6	125283969	125283970	RNF217	154214	106	CGI	TRUE	FALSE	FALSE
cg21762820	chr1	166135233	166135234	FAM78B	149297	723	CGI	TRUE	FALSE	FALSE
cg08231493	chr8	17271093	17271094	MTMR7	9108	-52	CGI	TRUE	FALSE	FALSE
cg02973171	chr11	82443614	82443615	FAM181B	220382	1290	CGI	TRUE	FALSE	FALSE
cg02743713	chr2	157178647	157178648	NR4A2	4929	10638	CGI	FALSE	FALSE	TRUE
cg17037282	chr5	50678928	50678929	ISL1	3670	-28	CGI	TRUE	FALSE	FALSE
cg03320827	chr6	10887367	10887368	GCM2	9247	-5268	CGI	TRUE	TRUE	FALSE
cg03218479	chr8	140945782	140945783	KCNK9	51305	-230482	Non-CGI	FALSE	TRUE	FALSE
cg05048976	chr3	55516243	55516244	WNT5A	7474	5086	CGI	TRUE	TRUE	FALSE
cg17877704	chr12	127940483	127940484	FLJ37505	400087	-425677	CGI	FALSE	FALSE	TRUE
cg18032969	chr5	145725385	145725386	POU4F3	5459	6797	CGI	FALSE	FALSE	TRUE
cg17362434	chr11	69832232	69832233	ANO1	55107	-92174	CGI	FALSE	FALSE	TRUE
cg06258780	chr5	7851407	7851408	C5orf49	134121	-142	CGI	TRUE	FALSE	FALSE
cg01151966	chr10	83634485	83634486	NRG3	10718	-583	CGI	TRUE	FALSE	FALSE
cg12296605	chr8	106331317	106331318	ZFPM2	23414	169	CGI	FALSE	TRUE	FALSE
cg00625963	chr1	32740034	32740035	HDAC1	3065	-17672	CGI-N-Shore	TRUE	TRUE	FALSE
cg09626984	chr8	11566096	11566097	GATA4	2626	31627	CGI	TRUE	TRUE	FALSE
cg16232126	chr2	108603005	108603006	SLC5A7	60482	9	CGI	TRUE	FALSE	FALSE
cg03968755	chr4	85418816	85418817	NKX6-1	4825	569	CGI	TRUE	FALSE	FALSE
cg09042277	chr12	114840854	114840855	TBX5-AS1	255480	-5144	CGI	FALSE	TRUE	FALSE
cg09774917	chr6	10417385	10417386	TFAP2A	7020	2410	CGI-S-Shore	TRUE	TRUE	FALSE
cg09797577	chr6	28778226	28778227	LOC401242	401242	53226	CGI	FALSE	FALSE	TRUE
cg01995743	chr6	118229732	118229733	SLC35F1	222553	1042	CGI	FALSE	TRUE	FALSE
cg07231955	chr3	169386507	169386508	MECOM	2122	-4943	CGI	FALSE	FALSE	TRUE
cg09805010	chr3	24536077	24536078	THRB	7068	374	CGI	FALSE	TRUE	FALSE
cg03451670	chr2	236579469	236579470	AGAP1	116987	176735	CGI	FALSE	TRUE	FALSE
cg11871421	chr17	6679476	6679477	FBXO39	162517	-74	CGI	TRUE	FALSE	FALSE
cg08693490	chr12	116757896	116757897	MED13L	23389	-42904	CGI-S-Shore	FALSE	FALSE	TRUE
cg25800765	chr12	85673347	85673348	ALX1	8092	-687	CGI	TRUE	FALSE	FALSE
cg23211240	chr11	111383624	111383625	MIR34B	407041	-37	CGI	TRUE	TRUE	FALSE
cg04131494	chr5	176936882	176936883	DOK3	79930	543	CGI-S-Shore	TRUE	TRUE	FALSE
cg07212778	chr2	119916510	119916511	C1QL2	165257	-38	CGI	TRUE	FALSE	FALSE
cg17112958	chr2	133426934	133426935	LYPD1	116372	2134	CGI	FALSE	TRUE	FALSE
cg02342594	chr9	124976596	124976597	LHX6	26468	14493	CGI	FALSE	TRUE	FALSE
cg17810176	chr19	36035831	36035832	TMEM147	10430	-669	CGI-N-Shore	TRUE	TRUE	FALSE
cg26005082	chr19	4769660	4769661	MIR7-3HG	284424	542	CGI	TRUE	TRUE	FALSE
cg16773899	chr5	83680326	83680327	EDIL3	10085	283	CGI-S-Shore	TRUE	FALSE	FALSE
cg03386144	chr17	46659751	46659752	MIR10A	406902	-2441	CGI	TRUE	TRUE	FALSE
cg22732253	chr2	63280164	63280165	OTX1	5013	2971	CGI	TRUE	TRUE	FALSE
cg22484737	chr7	115117568	115117569	MDFIC	29969	555358	CGI	FALSE	FALSE	TRUE
cg01610488	chr8	72987870	72987871	TRPA1	8989	-50	CGI	TRUE	FALSE	FALSE
cg16264705	chr12	54071194	54071195	ATP5G2	517	-681	CGI	TRUE	FALSE	FALSE
cg13917151	chr1	27730185	27730186	GPR3	2827	11032	CGI	FALSE	FALSE	TRUE
cg04529370	chr10	83635300	83635301	NRG3	10718	229	CGI	TRUE	FALSE	FALSE
cg12454814	chr14	58332480	58332481	SLC35F4	341880	110	CGI-S-Shore	TRUE	FALSE	FALSE
cg06758591	chr1	177140203	177140204	FAM5B	57795	-428	CGI	TRUE	FALSE	FALSE
cg08488841	chr3	127634271	127634272	KBTBD12	166348	-45	CGI	TRUE	FALSE	FALSE
cg00949753	chr1	214157306	214157307	PROX1	5629	-3978	CGI	FALSE	FALSE	TRUE
cg21647227	chr1	119527111	119527112	TBX15	6913	5066	CGI	FALSE	TRUE	FALSE
cg27314569	chr11	122852461	122852462	BSX	390259	-81	CGI	TRUE	FALSE	FALSE
cg18789663	chr1	242688591	242688592	PLD5	200150	-592	CGI	TRUE	FALSE	FALSE
cg12065138	chr1	4771201	4771202	AJAP1	55966	56095	CGI	FALSE	TRUE	FALSE
cg09685182	chr3	130236037	130236038	COL6A6	131873	-43139	CGI	FALSE	FALSE	TRUE
cg06482428	chr4	21950173	21950174	KCNIP4	80333	199	CGI	FALSE	TRUE	FALSE
cg26267340	chr8	31497829	31497830	NRG1	3084	917	CGI	TRUE	TRUE	FALSE
cg20764887	chr5	178004012	178004013	COL23A1	91522	13542	CGI	FALSE	TRUE	FALSE
cg07222863	chr8	104153592	104153593	C8orf56	157556	-21	CGI	TRUE	TRUE	FALSE
cg16793866	chr20	24451518	24451519	SYNDIG1	79953	1682	CGI	FALSE	TRUE	FALSE
cg21139312	chr17	55663225	55663226	MRPS23	51649	264206	Non-CGI	FALSE	TRUE	FALSE
cg05627522	chr15	75251581	75251582	RPP25	54913	-1805	CGI	TRUE	FALSE	FALSE
cg07178006	chr11	20184718	20184719	DBX1	120237	-2847	CGI-S-Shore	FALSE	FALSE	TRUE
cg02582387	chr1	20879813	20879814	FAM43B	163933	880	CGI	TRUE	FALSE	FALSE
cg06558502	chr19	57610699	57610700	USP29	57663	-20808	CGI-S-Shore	FALSE	FALSE	TRUE
cg04597433	chr4	9783206	9783207	DRD5	1816	-50	CGI	TRUE	FALSE	FALSE
cg02154186	chr8	26371353	26371354	PNMA2	10687	128	CGI	TRUE	FALSE	FALSE
cg01811325	chr10	131757672	131757673	EBF3	253738	4417	CGI	FALSE	TRUE	FALSE
cg03310939	chr7	101688730	101688731	CUX1	1523	229545	Non-CGI	FALSE	TRUE	FALSE
cg07065111	chr2	5831213	5831214	SOX11	6664	-1584	CGI	TRUE	FALSE	FALSE
cg14732248	chr6	1313730	1313731	FOXQ1	94234	1054	CGI	TRUE	FALSE	FALSE
cg02487453	chr22	31198724	31198725	MIR3200	100422912	71179	CGI	FALSE	TRUE	FALSE
cg15749870	chr6	123317473	123317474	CLVS2	134829	-107	CGI	TRUE	FALSE	FALSE
cg02106850	chr6	85474093	85474094	TBX18	9096	-193	CGI	TRUE	FALSE	FALSE
cg00335712	chr4	94749865	94749866	ATOH1	474	-211	CGI	TRUE	FALSE	FALSE
cg20312205	chr13	84456308	84456309	SLITRK1	114798	218	CGI	TRUE	FALSE	FALSE
cg20646280	chr4	44449738	44449739	KCTD8	386617	1084	CGI	TRUE	FALSE	FALSE
cg04704064	chr12	125039219	125039220	NCOR2	9612	12789	Non-CGI	FALSE	TRUE	FALSE
cg00812833	chr1	242687412	242687413	PLD5	200150	584	CGI	TRUE	TRUE	FALSE
cg13136510	chr2	133174117	133174118	GPR39	2863	-28	CGI	TRUE	FALSE	FALSE
cg09275667	chr15	55881083	55881084	PYGO1	26108	-32	CGI	TRUE	FALSE	FALSE
cg13929328	chr10	129535898	129535899	FOXI2	399823	359	CGI	TRUE	FALSE	FALSE
cg17759274	chr19	39260954	39260955	LGALS7	3963	3201	CGI	FALSE	FALSE	TRUE
cg15837212	chr1	63795970	63795971	FOXD3	27022	7239	CGI	FALSE	FALSE	TRUE
cg22367191	chr6	10425648	10425649	TFAP2A	7020	-5850	CGI	FALSE	FALSE	TRUE
cg19346645	chr4	141490153	141490154	UCP1	7350	-193	CGI	TRUE	FALSE	FALSE
cg16001722	chr6	127836159	127836160	SOGA3	387104	4339	CGI	FALSE	TRUE	FALSE
cg16783744	chr8	105478855	105478856	DPYS	1807	420	CGI	FALSE	TRUE	FALSE
cg22108374	chr15	74557527	74557528	CCDC33	80125	28859	Non-CGI	TRUE	TRUE	FALSE
cg01141812	chr6	123317124	123317125	CLVS2	134829	-456	CGI	TRUE	FALSE	FALSE
cg12261451	chr13	22243030	22243031	FGF9	2254	-2183	CGI-N-Shore	FALSE	FALSE	TRUE
cg00346208	chr1	20669905	20669906	VWA5B1	127731	52492	CGI	FALSE	TRUE	FALSE
cg14410016	chr2	176986659	176986660	HOXD9	3235	-752	CGI	TRUE	FALSE	FALSE
cg22836229	chr8	49647717	49647718	EFCAB1	79645	151	CGI-N-Shore	TRUE	FALSE	FALSE
cg26449787	chr6	133562087	133562088	EYA4	2070	350	CGI	TRUE	TRUE	FALSE
cg25385733	chr2	217237043	217237044	2004-03-01	57574	-292	CGI	TRUE	FALSE	FALSE
cg00902195	chr12	33592500	33592501	SYT10	341359	252	CGI	TRUE	FALSE	FALSE
cg19815904	chr7	80548307	80548308	SEMA3C	10512	3366	CGI	TRUE	TRUE	FALSE
cg20281309	chr11	78127618	78127619	GAB2	9846	1248	CGI-N-Shore	FALSE	TRUE	FALSE
cg07005778	chr4	188953586	188953587	ZFP42	132625	36660	CGI	FALSE	FALSE	TRUE
cg20611911	chr1	3567930	3567931	TP73	7161	-1197	CGI	TRUE	FALSE	FALSE
cg18668813	chr6	114177341	114177342	MARCKS	4082	-1184	CGI	TRUE	FALSE	FALSE
cg22598028	chr3	44626492	44626493	ZNF660	285349	35	CGI	TRUE	FALSE	FALSE
cg14781189	chr2	163695111	163695112	KCNH7	90134	144	CGI	TRUE	FALSE	FALSE
cg07135614	chr3	138663230	138663231	FOXL2	668	2750	CGI	TRUE	FALSE	FALSE
cg11274314	chr2	242480504	242480505	BOK	666	-17640	CGI	FALSE	FALSE	TRUE
cg07152216	chr3	147141219	147141220	ZIC1	7545	14037	CGI	FALSE	FALSE	TRUE
cg14306734	chr18	34833938	34833939	CELF4	56853	312060	CGI	FALSE	TRUE	FALSE
cg12843518	chr4	184826423	184826424	STOX2	56977	-84	CGI	TRUE	FALSE	FALSE
cg25250358	chr3	145879084	145879085	PLOD2	5352	196	CGI	TRUE	FALSE	FALSE
cg14345012	chr20	26189240	26189241	MIR663A	724033	-325	CGI	TRUE	TRUE	FALSE
cg04674956	chr8	65499048	65499049	LOC401463	401463	-4602	CGI-S-Shore	FALSE	FALSE	TRUE
cg03767531	chr2	182545572	182545573	NEUROD1	4760	-179	CGI	TRUE	FALSE	FALSE
cg23689712	chr1	165205314	165205315	LMX1A	4009	120636	CGI	FALSE	TRUE	FALSE
cg24301620	chr6	101846872	101846873	GRIK2	2898	202	CGI	TRUE	TRUE	FALSE
cg18490614	chr15	27213362	27213363	GABRG3	2567	-3065	CGI	FALSE	FALSE	TRUE
cg10121601	chr1	47698126	47698127	TAL1	6886	-233	CGI	TRUE	TRUE	FALSE
cg06095270	chr6	100060980	100060981	PRDM13	59336	6329	CGI	FALSE	TRUE	FALSE
cg00145253	chr1	75602857	75602858	LHX8	431707	8737	CGI	TRUE	TRUE	FALSE
cg21925310	chr22	44258574	44258575	SULT4A1	25830	-195	CGI	TRUE	FALSE	FALSE
cg13563725	chr15	27212911	27212912	GABRG3	2567	-3516	CGI	FALSE	FALSE	TRUE
cg05380982	chr21	39288378	39288379	KCNJ6	3763	316	CGI-S-Shore	TRUE	FALSE	FALSE
cg19084726	chr1	145075538	145075539	PDE4DIP	9659	646	CGI	FALSE	TRUE	FALSE
cg09623400	chr20	24450353	24450354	SYNDIG1	79953	517	CGI	TRUE	FALSE	FALSE
cg02629106	chr2	120302419	120302420	PCDP1	200373	393	CGI	FALSE	TRUE	FALSE
cg07251711	chr10	134600919	134600920	NKX6-2	84504	-1381	CGI	TRUE	FALSE	FALSE
cg01824511	chr14	38064456	38064457	FOXA1	3169	31	CGI-S-Shore	TRUE	FALSE	FALSE
cg02681442	chr14	29236008	29236009	FOXG1	2290	-277	CGI-S-Shore	TRUE	FALSE	FALSE
cg04365452	chr6	26690079	26690080	ZNF322	79692	-30098	CGI	FALSE	FALSE	TRUE
cg15707833	chr8	131455276	131455277	ASAP1	50807	628	CGI	FALSE	TRUE	FALSE
cg13661968	chr11	20621474	20621475	SLC6A5	9152	527	CGI	FALSE	TRUE	FALSE
cg01162672	chr6	133562275	133562276	EYA4	2070	538	CGI	TRUE	TRUE	FALSE
cg11452391	chr5	16180315	16180316	2011-03-01	441061	-417	CGI	TRUE	FALSE	FALSE
cg03964958	chr2	176964720	176964721	HOXD12	3238	189	CGI	TRUE	FALSE	FALSE
cg11441704	chr21	45145759	45145760	PDXK	8566	6780	CGI-N-Shelf	FALSE	TRUE	FALSE
cg13265789	chr4	96470584	96470585	UNC5C	8633	-222	CGI	TRUE	FALSE	FALSE
cg05044185	chr15	27112197	27112198	GABRA5	2558	330	CGI	TRUE	TRUE	FALSE
cg05756220	chr11	30038685	30038686	KCNA4	3739	-107	CGI	TRUE	FALSE	FALSE
cg10520887	chr4	96470094	96470095	UNC5C	8633	265	CGI	TRUE	FALSE	FALSE
cg07892597	chr1	119532093	119532094	TBX15	6913	84	CGI	TRUE	FALSE	FALSE
cg06281297	chr11	2890190	2890191	KCNQ1DN	55539	-1071	CGI-N-Shore	TRUE	FALSE	FALSE
cg14901671	chr17	70589079	70589080	LINC00673	100499467	-135	CGI-S-Shore	TRUE	FALSE	FALSE
cg00157668	chr10	109674526	109674527	SORCS1	114815	-750059	CGI	FALSE	FALSE	TRUE
cg07581732	chr21	39288729	39288730	KCNJ6	3763	-32	CGI-S-Shore	TRUE	FALSE	FALSE
cg07077013	chr2	177025198	177025199	HOXD3	3232	-3605	CGI	FALSE	FALSE	TRUE
cg06271970	chr15	96889169	96889170	MIR1469	100302258	12678	CGI	FALSE	FALSE	TRUE
cg20289688	chr11	17742502	17742503	MYOD1	4654	1391	CGI	FALSE	TRUE	FALSE
cg02759846	chr19	51227943	51227944	CLEC11A	6320	1337	CGI	FALSE	TRUE	FALSE
cg16788322	chr10	122216260	122216261	PPAPDC1A	196051	-204	CGI	TRUE	FALSE	FALSE
cg00707317	chr1	183387564	183387565	NMNAT2	23057	68	CGI	TRUE	FALSE	FALSE
cg16404157	chr14	38724648	38724649	CLEC14A	161198	924	CGI	TRUE	FALSE	FALSE
cg02423064	chr17	32484008	32484009	ASIC2	40	-182	CGI	TRUE	FALSE	FALSE
cg17942851	chr1	36786285	36786286	EVA1B	55194	3468	CGI-N-Shore	FALSE	TRUE	FALSE
cg10192893	chr4	41747895	41747896	PHOX2B	8929	3090	CGI	FALSE	TRUE	FALSE
cg04360793	chr1	79472361	79472362	ELTD1	64123	132	CGI	TRUE	FALSE	FALSE
cg22280038	chr7	79083408	79083409	MAGI2	9863	-517	CGI	TRUE	TRUE	FALSE
cg02352240	chr16	51188372	51188373	SALL1	6299	-3188	CGI	FALSE	FALSE	TRUE
cg17269633	chr17	42733600	42733601	C17orf104	284071	-160	CGI	TRUE	FALSE	FALSE
cg27549952	chr12	88974484	88974485	KITLG	4254	-233	CGI	TRUE	FALSE	FALSE
cg03356595	chr16	51187807	51187808	SALL1	6299	-2623	CGI	FALSE	FALSE	TRUE
cg14231297	chr19	58629901	58629902	ZSCAN18	65982	-107	CGI	TRUE	FALSE	FALSE
cg00558156	chr8	23261618	23261619	LOXL2	4017	102	CGI	TRUE	TRUE	FALSE
cg08120263	chr14	29236013	29236014	FOXG1	2290	-272	CGI-S-Shore	TRUE	FALSE	FALSE
cg09706122	chr12	54071165	54071166	ATP5G2	517	-652	CGI	TRUE	FALSE	FALSE
cg07355841	chr16	67427339	67427340	TPPP3	51673	80	CGI	TRUE	FALSE	FALSE
cg04991036	chr14	29243762	29243763	C14orf23	387978	1851	CGI	FALSE	TRUE	FALSE
cg00144186	chr11	35641054	35641055	FJX1	24147	1318	CGI	TRUE	FALSE	FALSE
cg21493505	chr19	56879418	56879419	ZNF542	147947	-48	CGI	TRUE	TRUE	FALSE
cg26846959	chr6	143998958	143998959	PHACTR2	9749	69640	CGI-N-Shore	TRUE	TRUE	FALSE
cg01819137	chr5	145719938	145719939	POU4F3	5459	1350	CGI	FALSE	TRUE	FALSE
cg14289542	chr13	112726662	112726663	SOX1	6656	4748	CGI	FALSE	FALSE	TRUE
cg03609960	chr12	99288805	99288806	APAF1	317	249726	CGI	TRUE	TRUE	FALSE
cg27252164	chr11	2292373	2292374	ASCL2	430	-190	CGI	TRUE	FALSE	FALSE
cg02172312	chr16	62069337	62069338	CDH8	1006	1400	CGI	FALSE	TRUE	FALSE
cg23621097	chr17	1962236	1962237	HIC1	3090	4787	CGI	FALSE	TRUE	FALSE
cg01482645	chr8	104513024	104513025	RIMS2	9699	47	CGI	TRUE	FALSE	FALSE
cg24911113	chr19	23185714	23185715	ZNF99	7652	-218740	CGI	FALSE	FALSE	TRUE
cg24988625	chr5	83680066	83680067	EDIL3	10085	543	CGI	FALSE	TRUE	FALSE
cg01184975	chr12	114852091	114852092	TBX5	6910	-5843	CGI	FALSE	FALSE	TRUE
cg02728050	chr10	50818153	50818154	SLC18A3	6572	-192	CGI	TRUE	TRUE	FALSE
cg22600868	chr3	126108097	126108098	CCDC37	348807	-5683	CGI	FALSE	FALSE	TRUE
cg16512615	chr4	141490351	141490352	UCP1	7350	-391	CGI	TRUE	FALSE	FALSE
cg12172057	chr7	47621687	47621688	TNS3	64759	53	CGI	TRUE	FALSE	FALSE
cg07191594	chr20	44650220	44650221	SLC12A5	57468	-107	CGI	TRUE	FALSE	FALSE
cg25527090	chr10	118894180	118894181	VAX1	11023	3630	CGI	FALSE	TRUE	FALSE
cg19927816	chr19	46319153	46319154	RSPH6A	81492	-547	CGI	TRUE	TRUE	FALSE
cg08482531	chr10	8078127	8078128	GATA3-AS1	399717	17318	CGI	FALSE	FALSE	TRUE
cg16005494	chr7	70597713	70597714	WBSCR17	64409	-74	CGI	TRUE	FALSE	FALSE
cg23726537	chr1	152488000	152488001	CRCT1	54544	1021	CGI	TRUE	TRUE	FALSE
cg06766427	chr17	12877546	12877547	ELAC2	60528	43833	CGI	FALSE	TRUE	FALSE
cg10539507	chr4	85420782	85420783	NKX6-1	4825	-1394	CGI	TRUE	FALSE	FALSE
cg02014003	chr14	27067707	27067708	NOVA1	4857	-746	CGI	TRUE	FALSE	FALSE
cg26447413	chr9	89560715	89560716	GAS1	2619	1387	CGI	TRUE	FALSE	FALSE
cg14638272	chr2	189157361	189157362	GULP1	51454	964	CGI	TRUE	TRUE	FALSE
cg05095591	chr3	147129184	147129185	ZIC1	7545	2002	CGI	FALSE	TRUE	FALSE
cg10658542	chr12	33592642	33592643	SYT10	341359	110	CGI	TRUE	FALSE	FALSE
cg06617456	chr8	68864769	68864770	PREX2	80243	165	CGI	TRUE	FALSE	FALSE
cg06674731	chr2	154335014	154335015	RPRM	56475	306	CGI	TRUE	FALSE	FALSE
cg26682068	chr19	57610689	57610690	USP29	57663	-20818	CGI-S-Shore	FALSE	FALSE	TRUE
cg18255166	chr17	13504399	13504400	HS3ST3A1	9955	843	CGI	TRUE	FALSE	FALSE
cg22358580	chr12	54426725	54426726	MIR615	693200	-1007	CGI-S-Shore	TRUE	TRUE	FALSE
cg12590600	chr20	644758	644759	SRXN1	140809	12063	CGI	FALSE	TRUE	FALSE
cg01345315	chr12	43945998	43945999	ADAMTS20	80070	-273	CGI	TRUE	FALSE	FALSE
cg09649610	chr1	235814039	235814040	GNG4	2786	13	CGI	TRUE	FALSE	FALSE
cg11926610	chr15	37403211	37403212	MEIS2	4212	-9710	CGI	FALSE	FALSE	TRUE
cg14631834	chr18	28623040	28623041	DSC3	1825	-258	CGI	TRUE	FALSE	FALSE
cg20557801	chr15	68121177	68121178	SKOR1	390598	3235	CGI	FALSE	TRUE	FALSE
cg10945079	chr2	162283856	162283857	TBR1	10716	11235	CGI-S-Shore	FALSE	FALSE	TRUE
cg05361559	chr8	22549103	22549104	EGR3	1960	1710	CGI	FALSE	TRUE	FALSE
cg17351154	chr19	46181428	46181429	MIR642B	100500845	-3161	CGI	FALSE	TRUE	FALSE
cg01581222	chr19	10958952	10958953	C19orf38	255809	-152	Non-CGI	TRUE	FALSE	FALSE
cg14836602	chr5	3592718	3592719	IRX1	79192	-3448	CGI	FALSE	FALSE	TRUE
cg12373084	chr9	12775700	12775701	LURAP1L	286343	687	CGI	TRUE	FALSE	FALSE
cg03250019	chr18	5197066	5197067	C18orf42	642597	187	CGI	TRUE	FALSE	FALSE
cg14834938	chr5	50678919	50678920	ISL1	3670	-37	CGI	TRUE	FALSE	FALSE
cg24132481	chr17	2658712	2658713	MIR1253	100302208	-7235	CGI-N-Shore	FALSE	FALSE	TRUE
cg17380661	chr6	100912946	100912947	SIM1	6492	-140	CGI	TRUE	FALSE	FALSE
cg26923490	chr19	49575475	49575476	KCNA7	3743	721	CGI	TRUE	FALSE	FALSE
cg18276638	chr1	214360619	214360620	SMYD2	56950	-93944	CGI	FALSE	FALSE	TRUE
cg17301902	chr9	80263219	80263220	GNA14	9630	11	CGI	TRUE	FALSE	FALSE
cg12214908	chr19	47910549	47910550	MEIS3	56917	12234	CGI	FALSE	TRUE	FALSE
cg10591607	chr6	101846916	101846917	GRIK2	2898	246	CGI	TRUE	TRUE	FALSE
cg18235050	chr12	126676048	126676049	LOC400084	400084	-208127	CGI	FALSE	FALSE	TRUE
cg03389653	chr16	49316197	49316198	CBLN1	869	-454	CGI	TRUE	FALSE	FALSE
cg24628676	chr5	59189846	59189847	PART1	25859	-593692	CGI	TRUE	TRUE	FALSE
cg08754967	chr10	736083	736084	DIP2C	22982	-474	CGI	TRUE	FALSE	FALSE
cg03843000	chr12	114846968	114846969	TBX5	6910	-720	CGI	TRUE	TRUE	FALSE
cg25570278	chr14	23306509	23306510	MMP14	4323	715	CGI	FALSE	TRUE	FALSE
cg04813880	chr16	21171067	21171068	DNAH3	55567	-304	CGI-S-Shore	TRUE	TRUE	FALSE
cg05295006	chr4	172734347	172734348	GALNTL6	442117	-226	CGI	TRUE	FALSE	FALSE
cg04084157	chr7	100809049	100809050	VGF	7425	-196	CGI	TRUE	FALSE	FALSE
cg14412322	chr3	65534685	65534686	MAGI1	9223	489822	CGI-N-Shore	FALSE	TRUE	FALSE
cg19754554	chr1	66258687	66258688	PDE4B	5142	493	CGI	TRUE	TRUE	FALSE
cg07178825	chr1	3649574	3649575	TP73-AS1	57212	14361	CGI	FALSE	TRUE	FALSE
cg16032408	chr3	14466411	14466412	SLC6A6	6533	22304	Non-CGI	FALSE	TRUE	FALSE
cg08719869	chr9	8857486	8857487	C9orf123	90871	-1057686	CGI	TRUE	TRUE	FALSE
cg19908812	chr4	164253006	164253007	NPY1R	4886	939	CGI	FALSE	TRUE	FALSE
cg17526229	chr11	20177746	20177747	DBX1	120237	4122	CGI	FALSE	FALSE	TRUE
cg27094244	chr11	61335269	61335270	SYT7	9066	13073	CGI	FALSE	TRUE	FALSE
cg05543049	chr3	173115741	173115742	NLGN1	22871	-501	CGI	TRUE	FALSE	FALSE
cg17246140	chr2	43020264	43020265	HAAO	23498	-512	CGI	TRUE	FALSE	FALSE
cg21851672	chr1	200007863	200007864	NR5A2	2494	11092	CGI	TRUE	TRUE	FALSE
cg00503383	chr1	91301651	91301652	BARHL2	343472	-118856	CGI	TRUE	TRUE	FALSE
cg08550101	chr7	20823981	20823982	SP8	221833	2525	CGI	TRUE	TRUE	FALSE
cg10689528	chr8	97169767	97169768	GDF6	392255	3251	CGI	FALSE	TRUE	FALSE
cg08441138	chr11	128555233	128555234	FLI1	2313	-1195	CGI-N-Shore	TRUE	TRUE	FALSE
cg03553587	chr3	28616941	28616942	LINC00693	645206	171	CGI	TRUE	TRUE	FALSE
cg04237997	chr11	124629752	124629753	ESAM	90952	2469	CGI	FALSE	TRUE	FALSE
cg03091551	chr14	57275967	57275968	OTX2	5015	1215	CGI	FALSE	TRUE	FALSE
cg06010588	chr8	35092876	35092877	UNC5D	137970	-97	CGI	TRUE	FALSE	FALSE
cg13644317	chr18	70536461	70536462	NETO1	81832	-1650	CGI	TRUE	FALSE	FALSE
cg07158747	chr1	91196488	91196489	BARHL2	343472	-13693	CGI	FALSE	FALSE	TRUE
cg00466268	chr3	164914621	164914622	SLITRK3	22865	-151	CGI	TRUE	FALSE	FALSE
cg21686890	chr22	35773089	35773090	HMOX1	3162	-3969	CGI-N-Shelf	FALSE	FALSE	TRUE
cg14912644	chr2	157176601	157176602	NR4A2	4929	12684	CGI	FALSE	FALSE	TRUE
cg10894483	chr22	44257997	44257998	SULT4A1	25830	379	CGI	FALSE	TRUE	FALSE
cg04461228	chr5	92906678	92906679	FLJ42709	441094	10323	CGI	TRUE	TRUE	FALSE
cg17949440	chr11	40315392	40315393	LRRC4C	57689	1165929	CGI	TRUE	TRUE	FALSE
cg09688588	chr3	191047460	191047461	CCDC50	152137	585	CGI	TRUE	TRUE	FALSE
cg06763054	chr8	17270834	17270835	MTMR7	9108	204	CGI	TRUE	FALSE	FALSE
cg19491035	chr12	12502846	12502847	MANSC1	54682	321	CGI	FALSE	TRUE	FALSE
cg08889336	chr7	47294278	47294279	TNS3	64759	327462	CGI-S-Shore	FALSE	FALSE	TRUE
cg11701471	chr8	54164051	54164052	OPRK1	4986	141	CGI	TRUE	FALSE	FALSE
cg23337382	chr4	22517965	22517966	GPR125	166647	-292	CGI	TRUE	FALSE	FALSE
cg05293820	chr3	120627406	120627407	STXBP5L	9515	355	CGI	FALSE	TRUE	FALSE
cg19988449	chr15	83952808	83952809	BNC1	646	658	CGI	TRUE	TRUE	FALSE
cg26144658	chr5	121647642	121647643	SNCAIP	9627	255	CGI	TRUE	TRUE	FALSE
cg01959730	chr1	119548825	119548826	TBX15	6913	-16645	CGI-N-Shore	FALSE	FALSE	TRUE
cg22797900	chr20	656558	656559	SRXN1	140809	263	CGI	TRUE	FALSE	FALSE
cg02119363	chr3	179754603	179754604	PEX5L	51555	-85	CGI	TRUE	FALSE	FALSE
cg07636295	chr20	656446	656447	SRXN1	140809	375	CGI	TRUE	FALSE	FALSE
cg23093589	chr7	20824932	20824933	SP8	221833	1574	CGI	TRUE	TRUE	FALSE
cg25019989	chr4	54961835	54961836	GSX2	170825	-4411	CGI-S-Shore	FALSE	TRUE	FALSE
cg23085662	chr18	59000860	59000861	CDH20	28316	-126	CGI	TRUE	FALSE	FALSE
cg02825171	chr6	168720183	168720184	DACT2	168002	217	CGI	TRUE	FALSE	FALSE
cg13464915	chr18	25757202	25757203	CDH2	1000	241	CGI	TRUE	FALSE	FALSE
cg20398486	chr2	176944442	176944443	EVX2	344191	4246	CGI	FALSE	FALSE	TRUE
cg10092878	chr7	73038859	73038860	MLXIPL	51085	9	CGI	TRUE	FALSE	FALSE
cg01852585	chr4	106817015	106817016	NPNT	255743	417	CGI	FALSE	TRUE	FALSE
cg10137231	chr14	24641021	24641022	REC8	9985	-211	CGI	TRUE	FALSE	FALSE
cg11536474	chr2	63286049	63286050	OTX1	5013	8856	CGI	FALSE	FALSE	TRUE
cg20705321	chr19	10958970	10958971	C19orf38	255809	-134	Non-CGI	TRUE	FALSE	FALSE
cg04059568	chr7	157486012	157486013	MIR153-2	406945	-118897	CGI	FALSE	TRUE	FALSE
cg06793562	chr6	85482570	85482571	TBX18	9096	-8670	CGI-S-Shore	FALSE	FALSE	TRUE
cg01106338	chr18	44790514	44790515	IER3IP1	51124	-87768	CGI	FALSE	FALSE	TRUE
cg27659049	chr12	115173713	115173714	TBX3	6926	-51743	CGI	FALSE	FALSE	TRUE
cg07967679	chr12	52626814	52626815	KRT7	3855	-138	CGI-N-Shore	TRUE	FALSE	FALSE
cg24035598	chr14	61124418	61124419	SIX1	6495	-8262	CGI	FALSE	FALSE	TRUE
cg05756933	chr6	110300101	110300102	GPR6	2830	-195	CGI	TRUE	TRUE	FALSE
cg18628371	chr14	24641189	24641190	REC8	9985	-43	CGI	TRUE	FALSE	FALSE
cg16832267	chr2	18060102	18060103	KCNS3	3790	987	CGI	FALSE	TRUE	FALSE
cg15989068	chr2	5837057	5837058	SOX11	6664	4257	CGI	TRUE	FALSE	FALSE
cg24040346	chr6	106533925	106533926	PRDM1	639	-268	CGI-N-Shore	TRUE	FALSE	FALSE
cg07903370	chr5	3595106	3595107	IRX1	79192	-1060	CGI	TRUE	FALSE	FALSE
cg22900415	chr13	20736075	20736076	GJA3	2700	-891	CGI	TRUE	FALSE	FALSE
cg04861929	chr11	109293070	109293071	C11orf87	399947	223	CGI	TRUE	TRUE	FALSE
cg05524246	chr1	161973909	161973910	OLFML2B	25903	19733	Non-CGI	FALSE	TRUE	FALSE
cg09578568	chr4	113432770	113432771	NEUROG2	63973	4556	CGI	FALSE	FALSE	TRUE
cg16735881	chr13	36045352	36045353	MIR548F5	100302239	470028	CGI	TRUE	TRUE	FALSE
cg17438030	chr5	72526379	72526380	TMEM174	134288	57355	CGI	FALSE	FALSE	TRUE
cg24021956	chr7	79083509	79083510	MAGI2	9863	-618	CGI	TRUE	TRUE	FALSE
cg03573446	chr20	55841893	55841894	BMP7	655	-185	CGI	TRUE	FALSE	FALSE
cg20334313	chr8	50822381	50822382	SNTG1	54212	31	CGI	TRUE	FALSE	FALSE
cg01688688	chr5	140614000	140614001	PCDHB18	54660	61	CGI	TRUE	FALSE	FALSE
cg05550276	chr16	52580524	52580525	TOX3	27324	1188	CGI	FALSE	TRUE	FALSE
cg16536329	chr5	178368185	178368186	ZNF454	285676	-7	CGI	TRUE	FALSE	FALSE
cg27392804	chr13	107001662	107001663	LINC00460	728192	-27247	CGI	FALSE	FALSE	TRUE
cg07935568	chr13	49794126	49794127	MLNR	2862	-346	CGI	TRUE	FALSE	FALSE
cg00150882	chr4	171011502	171011503	AADAT	51166	-129	CGI	TRUE	FALSE	FALSE
cg14685796	chr5	50265660	50265661	PARP8	79668	303926	CGI	FALSE	FALSE	TRUE
cg09547756	chr19	3671903	3671904	PIP5K1C	23396	28572	CGI	FALSE	TRUE	FALSE
cg23361092	chr13	79170923	79170924	POU4F1	5457	6770	CGI-S-Shore	FALSE	TRUE	FALSE
cg05215925	chr6	154360587	154360588	OPRM1	4988	28955	CGI	TRUE	TRUE	FALSE
cg03496114	chr17	80329459	80329460	UTS2R	2837	-2740	CGI	FALSE	FALSE	TRUE
cg26708319	chr4	111552040	111552041	PITX2	5308	11237	CGI	FALSE	TRUE	FALSE
cg18235734	chr1	91301731	91301732	BARHL2	343472	-118936	CGI	TRUE	TRUE	FALSE
cg25996084	chr17	12569117	12569118	MYOCD	93649	-88	CGI	TRUE	FALSE	FALSE
cg26200580	chr6	170615273	170615274	FAM120B	84498	-569	CGI-N-Shore	TRUE	FALSE	FALSE
cg21655915	chr3	65535247	65535248	MAGI1	9223	489260	CGI	FALSE	TRUE	FALSE
cg04184232	chr14	29243234	29243235	C14orf23	387978	1323	CGI	FALSE	TRUE	FALSE
cg00468146	chr6	19838211	19838212	ID4	3400	593	CGI	TRUE	FALSE	FALSE
cg08184652	chr2	162270993	162270994	TBR1	10716	-1625	CGI	TRUE	FALSE	FALSE
cg14015441	chr8	105479318	105479319	DPYS	1807	-40	CGI	TRUE	FALSE	FALSE
cg12744820	chr6	137814960	137814961	OLIG3	167826	569	CGI	TRUE	FALSE	FALSE
cg01032675	chr19	3136430	3136431	GNA15	2769	238	CGI	TRUE	FALSE	FALSE
cg22995692	chr5	141263164	141263165	PCDH1	5097	-5219	CGI	FALSE	FALSE	TRUE
cg20931033	chr1	50489577	50489578	AGBL4	84871	47	CGI	TRUE	FALSE	FALSE
cg10263682	chr3	181413847	181413848	SOX2	6657	-15863	CGI-S-Shore	FALSE	TRUE	FALSE
cg05667379	chr2	115920764	115920765	LOC389023	389023	-1843	CGI	TRUE	TRUE	FALSE
cg06641153	chr18	55021669	55021670	ST8SIA3	51046	1947	CGI-S-Shore	FALSE	TRUE	FALSE
cg03024760	chr15	27215997	27215998	GABRG3	2567	-430	CGI	TRUE	FALSE	FALSE
cg05085500	chr6	19692172	19692173	ID4	3400	-145443	CGI	FALSE	FALSE	TRUE
cg06821999	chr14	95238156	95238157	GSC	145258	-1656	CGI	TRUE	FALSE	FALSE
cg15962547	chr1	204183337	204183338	GOLT1A	127845	-116	CGI	TRUE	FALSE	FALSE
cg04047221	chr13	112723477	112723478	SOX1	6656	1563	CGI	TRUE	FALSE	FALSE
cg06425919	chr11	17741925	17741926	MYOD1	4654	814	CGI	TRUE	FALSE	FALSE
cg02057782	chr13	26042598	26042599	ATP8A2	51761	96388	CGI	TRUE	TRUE	FALSE
cg01135780	chr5	158527707	158527708	EBF1	1879	-918	CGI	TRUE	FALSE	FALSE
cg18420965	chr4	66535145	66535146	EPHA5	2044	506	CGI	TRUE	TRUE	FALSE
cg08130912	chr14	64687388	64687389	ESR2	2100	117878	Non-CGI	FALSE	TRUE	FALSE
cg21629500	chr5	2754753	2754754	C5orf38	153571	2490	CGI	FALSE	TRUE	FALSE
cg13198321	chr15	58357891	58357892	AQP9	366	-72502	CGI	TRUE	TRUE	FALSE
cg02168303	chr7	27265309	27265310	EVX1	2128	-16853	CGI	FALSE	FALSE	TRUE
cg20129242	chr6	75915754	75915755	COL12A1	1303	-130	CGI	TRUE	FALSE	FALSE
cg06829968	chr15	53076235	53076236	ONECUT1	3175	5972	CGI-S-Shore	FALSE	TRUE	FALSE
cg27506082	chr2	207139431	207139432	ZDBF2	57683	-90	CGI	TRUE	FALSE	FALSE
cg06567373	chr10	102483843	102483844	PAX2	5076	-21623	CGI-N-Shore	FALSE	FALSE	TRUE
cg08209133	chr4	48485624	48485625	SLC10A4	201780	263	CGI	TRUE	FALSE	FALSE
cg13486406	chr7	113727612	113727613	FOXP2	93986	1246	CGI	FALSE	TRUE	FALSE
cg14176752	chr6	100913250	100913251	SIM1	6492	-444	CGI	TRUE	FALSE	FALSE
cg02333852	chr3	24536252	24536253	THRB	7068	199	CGI	TRUE	TRUE	FALSE
cg24617696	chr2	121104312	121104313	INHBB	3625	592	CGI	FALSE	TRUE	FALSE
cg06391468	chr17	70117530	70117531	SOX9	6662	368	CGI	TRUE	FALSE	FALSE
cg19808205	chr1	67217984	67217985	TCTEX1D1	200132	-154	CGI	TRUE	FALSE	FALSE
cg06816235	chr11	27742219	27742220	BDNF	627	1384	CGI	TRUE	TRUE	FALSE
cg07436991	chr20	11871311	11871312	BTBD3	22903	-164	CGI	TRUE	FALSE	FALSE
cg24856726	chr12	108169333	108169334	ASCL4	121549	1170	CGI	TRUE	FALSE	FALSE
cg22167515	chr1	91192466	91192467	BARHL2	343472	-9671	CGI	FALSE	FALSE	TRUE
cg17455088	chr2	206551466	206551467	NRP2	8828	4241	CGI	FALSE	TRUE	FALSE
cg23873669	chr5	170289421	170289422	RANBP17	64901	524	CGI	FALSE	TRUE	FALSE
cg12832313	chr5	140346236	140346237	PCDHAC2	56134	488	CGI	TRUE	TRUE	FALSE
cg27397465	chr6	114178505	114178506	MARCKS	4082	-20	CGI	TRUE	FALSE	FALSE
cg06966811	chr14	57276789	57276790	OTX2	5015	393	CGI	TRUE	TRUE	FALSE
cg05299793	chr14	63512588	63512589	KCNH5	27133	55994	CGI	TRUE	TRUE	FALSE
cg06649410	chr6	154360483	154360484	OPRM1	4988	28851	CGI-N-Shore	TRUE	TRUE	FALSE
cg23497016	chr2	66666684	66666685	MEIS1	4211	4151	CGI	TRUE	TRUE	FALSE
cg17928147	chr19	13125281	13125282	NFIX	4784	18696	CGI-S-Shore	FALSE	TRUE	FALSE
cg24673101	chr14	100069840	100069841	CCDC85C	317762	885	CGI	TRUE	FALSE	FALSE
cg11896587	chr19	39440734	39440735	SARS2	54938	-238	CGI	TRUE	TRUE	FALSE
cg17110524	chr6	7052860	7052861	RREB1	6239	-54968	CGI	FALSE	FALSE	TRUE
cg04168670	chr2	124782817	124782818	CNTNAP5	129684	-45	CGI	TRUE	FALSE	FALSE
cg25006194	chr12	94288553	94288554	CRADD	8738	217401	Non-CGI	FALSE	TRUE	FALSE
cg08812189	chr3	147110367	147110368	ZIC4	84107	14227	CGI	TRUE	TRUE	FALSE
cg12393318	chr5	87981068	87981069	LINC00461	645323	-447	CGI	TRUE	FALSE	FALSE
cg12940822	chr5	127873397	127873398	FBN2	2201	517	CGI	TRUE	FALSE	FALSE
cg15370180	chr10	23484326	23484327	PTF1A	256297	2865	CGI-S-Shore	FALSE	FALSE	TRUE
cg22355517	chr12	20522674	20522675	PDE3A	5139	494	CGI	TRUE	FALSE	FALSE
cg03989260	chr1	119529360	119529361	TBX15	6913	2817	CGI	FALSE	TRUE	FALSE
cg24041917	chr1	119535986	119535987	TBX15	6913	-3806	CGI	FALSE	FALSE	TRUE
cg24966363	chr8	8932588	8932589	MIR4660	100616350	26632	Non-CGI	FALSE	FALSE	TRUE
cg15457899	chr11	123525665	123525666	SCN3B	55800	-349	CGI	TRUE	FALSE	FALSE
cg09838285	chr19	11805721	11805722	ZNF823	55552	44037	CGI	FALSE	FALSE	TRUE
cg20303399	chr8	26722965	26722966	ADRA1A	148	-42	CGI	TRUE	FALSE	FALSE
cg21187769	chr4	93226495	93226496	GRID2	2895	944	CGI	FALSE	TRUE	FALSE
cg16910830	chr7	145813437	145813438	CNTNAP2	26047	-14	CGI	TRUE	FALSE	FALSE
cg24935332	chr11	31846819	31846820	PAX6	5080	-7309	CGI	FALSE	TRUE	FALSE
cg07003030	chr20	22565995	22565996	FOXA2	3170	104	CGI	TRUE	FALSE	FALSE
cg10796899	chr10	735041	735042	DIP2C	22982	565	CGI	FALSE	TRUE	FALSE
cg16473762	chr20	57797319	57797320	ZNF831	128611	31243	CGI	FALSE	TRUE	FALSE
cg08286181	chr12	115134991	115134992	TBX3	6926	-13021	CGI	FALSE	FALSE	TRUE
cg17243289	chr18	45458021	45458022	SMAD2	4087	-505	CGI	TRUE	FALSE	FALSE
cg16081281	chr8	23559839	23559840	NKX2-6	137814	4270	CGI	FALSE	FALSE	TRUE
cg25510090	chr19	56616706	56616707	ZNF787	126208	15941	CGI-S-Shore	FALSE	TRUE	FALSE
cg04684267	chr19	58694502	58694503	ZNF274	10782	105	CGI	TRUE	FALSE	FALSE
cg01069941	chr17	58218850	58218851	CA4	762	-8450	CGI	FALSE	FALSE	TRUE
cg16435779	chr8	102504447	102504448	GRHL2	79977	-219	CGI	TRUE	FALSE	FALSE
cg24690071	chr13	100635352	100635353	ZIC2	7546	1325	CGI	TRUE	FALSE	FALSE
cg25453381	chr18	59562120	59562121	RNF152	220441	-1815	CGI	TRUE	FALSE	FALSE
cg02547394	chr13	112721789	112721790	SOX1	6656	-122	CGI	TRUE	FALSE	FALSE
cg25657713	chr6	100038708	100038709	PRDM13	59336	-15940	CGI	FALSE	FALSE	TRUE
cg17869514	chr9	1042770	1042771	DMRT2	10655	-7574	CGI	FALSE	FALSE	TRUE
cg27304533	chr19	13125170	13125171	NFIX	4784	18585	CGI	FALSE	TRUE	FALSE
cg05839235	chr5	32712237	32712238	NPR3	4883	1493	CGI	TRUE	TRUE	FALSE
cg10762626	chr15	28344715	28344716	OCA2	4948	-256	CGI	TRUE	FALSE	FALSE
cg26059468	chr8	55370579	55370580	SOX17	64321	83	CGI	TRUE	FALSE	FALSE
cg24654264	chr2	189157348	189157349	GULP1	51454	951	CGI	TRUE	TRUE	FALSE
cg19672997	chr14	48144369	48144370	MDGA2	161357	-211	CGI	TRUE	FALSE	FALSE
cg22491548	chr7	128000861	128000862	PRRT4	401399	876	CGI-N-Shore	FALSE	TRUE	FALSE
cg21609640	chr1	166890380	166890381	TADA1	117143	-44725	CGI	FALSE	TRUE	FALSE
cg23824801	chr12	54653403	54653404	CBX5	23468	20510	Non-CGI	TRUE	TRUE	FALSE
cg08756121	chr8	8820884	8820885	ERI1	90459	-39428	CGI	FALSE	FALSE	TRUE
cg17300051	chr2	155554130	155554131	KCNJ3	3760	-961	CGI	TRUE	FALSE	FALSE
cg14527456	chr14	74100987	74100988	DNAL1	83544	-10589	CGI	FALSE	FALSE	TRUE
cg24089600	chr13	110960177	110960178	COL4A2	1284	545	CGI	TRUE	TRUE	FALSE
cg10498921	chr5	139625058	139625059	PFDN1	5201	57629	Non-CGI	TRUE	TRUE	FALSE
cg21300373	chr4	165304540	165304541	2001-03-01	55016	-132	CGI	TRUE	FALSE	FALSE
cg22620221	chr7	153584416	153584417	DPP6	1804	-1	CGI	TRUE	FALSE	FALSE
cg13167753	chr1	210112031	210112032	SYT14	255928	492	CGI	FALSE	TRUE	FALSE
cg09484039	chr2	183731310	183731311	FRZB	2487	186	CGI	TRUE	FALSE	FALSE
cg22328786	chr20	35491355	35491356	SOGA1	140710	730	CGI	TRUE	FALSE	FALSE
cg18629427	chr4	93226926	93226927	GRID2	2895	1375	CGI	FALSE	TRUE	FALSE
cg09338032	chr12	113916609	113916610	LHX5	64211	-6731	CGI	FALSE	FALSE	TRUE
cg27578811	chr15	83316223	83316224	CPEB1	64506	503	CGI	TRUE	TRUE	FALSE
cg17929770	chr19	46318514	46318515	RSPH6A	81492	89	CGI	TRUE	FALSE	FALSE
cg21870229	chr21	45145841	45145842	PDXK	8566	6862	CGI-N-Shelf	FALSE	TRUE	FALSE
cg02100819	chr19	29284511	29284512	LOC148145	148145	-171525	CGI	FALSE	FALSE	TRUE
cg10575261	chr5	178368160	178368161	ZNF454	285676	-32	CGI	TRUE	FALSE	FALSE
cg23538901	chr15	46006849	46006850	SQRDL	58472	83502	CGI-N-Shore	FALSE	FALSE	TRUE
cg22815110	chr1	63788933	63788934	FOXD3	27022	202	CGI	TRUE	FALSE	FALSE
cg24842733	chr6	84419237	84419238	SNAP91	9892	-109	CGI	TRUE	FALSE	FALSE
cg23748737	chr22	20791733	20791734	SCARF2	91179	411	CGI	FALSE	TRUE	FALSE
cg16325502	chr2	223166435	223166436	PAX3	5077	-2719	CGI	FALSE	TRUE	FALSE
cg19947104	chr11	17757342	17757343	KCNC1	3746	-151	CGI	TRUE	FALSE	FALSE
cg13933080	chr10	22634145	22634146	SPAG6	9576	-227	CGI	TRUE	FALSE	FALSE
cg07136998	chr5	168728081	168728082	SLIT3	6586	50	CGI	TRUE	FALSE	FALSE
cg15617155	chr1	63785321	63785322	LINC00466	199899	-2419	CGI	FALSE	FALSE	TRUE
cg07477792	chr3	117716071	117716072	IGSF11	152404	1148825	CGI	FALSE	FALSE	TRUE
cg26967100	chr14	61104032	61104033	SIX1	6495	12121	CGI	FALSE	FALSE	TRUE
cg21293242	chr8	11204541	11204542	TDH	157739	7394	CGI	TRUE	TRUE	FALSE
cg14080967	chr9	8857491	8857492	C9orf123	90871	-1057691	CGI	TRUE	TRUE	FALSE
cg20274950	chr4	187647402	187647403	FAT1	2195	446	CGI	FALSE	TRUE	FALSE
cg18252903	chr3	147072643	147072644	ZIC4	84107	51951	CGI	FALSE	FALSE	TRUE
cg03482682	chr20	708659	708660	SLC52A3	113278	40567	CGI	FALSE	FALSE	TRUE
cg19864758	chr20	17206720	17206721	PCSK2	5126	-30	CGI	TRUE	FALSE	FALSE
cg20232102	chr19	38747174	38747175	PPP1R14A	94274	55	CGI	TRUE	FALSE	FALSE
cg27345757	chr3	123602795	123602796	MYLK	4638	352	CGI	FALSE	TRUE	FALSE
cg19519964	chr2	223290012	223290013	SGPP2	130367	689	CGI	FALSE	TRUE	FALSE
cg20026798	chr4	184826443	184826444	STOX2	56977	-64	CGI	TRUE	FALSE	FALSE
cg10658666	chr2	63276718	63276719	OTX1	5013	-472	CGI	TRUE	FALSE	FALSE
cg12751432	chr8	56015066	56015067	XKR4	114786	48	CGI	TRUE	FALSE	FALSE
cg04267526	chr10	109674297	109674298	SORCS1	114815	-749830	CGI	FALSE	FALSE	TRUE
cg00735667	chr3	74663796	74663797	CNTN3	5067	-93452	CGI	FALSE	FALSE	TRUE
cg09469566	chr13	112717244	112717245	SOX1	6656	-4667	CGI	FALSE	FALSE	TRUE
cg07883823	chr6	160769116	160769117	SLC22A3	6581	-307	CGI	TRUE	FALSE	FALSE
cg07366503	chr1	228330085	228330086	GUK1	2987	2299	CGI-S-Shore	FALSE	TRUE	FALSE
cg04913979	chr3	157821994	157821995	SHOX2	6474	1956	CGI	FALSE	TRUE	FALSE
cg08122140	chr14	34420415	34420416	EGLN3	112399	-130	CGI	TRUE	FALSE	FALSE
cg19572637	chr2	66660175	66660176	MEIS1	4211	-2355	CGI	FALSE	FALSE	TRUE
cg01587896	chr5	50678925	50678926	ISL1	3670	-31	CGI	TRUE	FALSE	FALSE
cg01580888	chr19	33556060	33556061	RHPN2	85415	-235	CGI	TRUE	FALSE	FALSE
cg23318063	chr14	58332751	58332752	SLC35F4	341880	-158	CGI	TRUE	FALSE	FALSE
cg13683040	chr9	37035766	37035767	PAX5	5079	-1289	CGI	TRUE	FALSE	FALSE
cg11358945	chr2	157185891	157185892	NR4A2	4929	3394	CGI	TRUE	TRUE	FALSE
cg02463418	chr4	66535575	66535576	EPHA5	2044	76	CGI	TRUE	FALSE	FALSE
cg17774672	chr7	25898541	25898542	MIR148A	406940	91063	CGI	FALSE	FALSE	TRUE
cg11711420	chr5	50679290	50679291	ISL1	3670	331	CGI	TRUE	FALSE	FALSE
cg02044223	chr3	24871017	24871018	MIR4792	100616448	-308090	CGI	FALSE	FALSE	TRUE
cg05668372	chr20	62734251	62734252	NPBWR2	2832	3931	CGI	FALSE	FALSE	TRUE
cg03300589	chr5	41510820	41510821	PLCXD3	345557	-89	CGI	TRUE	FALSE	FALSE
cg05181041	chr10	128076941	128076942	ADAM12	8038	184	CGI	TRUE	FALSE	FALSE
cg22068629	chr19	2446633	2446634	LMNB2	84823	10323	CGI-N-Shore	FALSE	TRUE	FALSE
cg06878361	chr19	52390810	52390811	ZNF577	84765	3333	CGI-N-Shore	TRUE	TRUE	FALSE
cg20268039	chr7	25900167	25900168	MIR148A	406940	89437	CGI	FALSE	FALSE	TRUE
cg00903099	chr7	154862441	154862442	HTR5A	3361	-103	CGI	TRUE	TRUE	FALSE
cg09226262	chr19	46319145	46319146	RSPH6A	81492	-539	CGI	TRUE	TRUE	FALSE
cg08315770	chr6	39281885	39281886	KCNK17	89822	350	CGI	TRUE	FALSE	FALSE
cg07102001	chr16	87734816	87734817	KLHDC4	54758	64780	CGI-S-Shore	TRUE	TRUE	FALSE
cg06641388	chr1	12655240	12655241	DHRS3	9249	22578	CGI-N-Shore	FALSE	TRUE	FALSE
cg19267252	chr2	105459317	105459318	LOC100506421	100506421	8615	CGI	FALSE	TRUE	FALSE
cg10796805	chr3	35680802	35680803	ARPP21	10777	-277	CGI	TRUE	FALSE	FALSE
cg15520279	chr2	176995088	176995089	HOXD8	3234	665	CGI	TRUE	TRUE	FALSE
cg04612444	chr8	57358713	57358714	PENK	5179	567	CGI	TRUE	TRUE	FALSE
cg02167438	chr20	9819697	9819698	PAK7	57144	-9	CGI	TRUE	FALSE	FALSE
cg13024368	chr11	12030088	12030089	DKK3	27122	1226	CGI	TRUE	TRUE	FALSE
cg20902817	chr15	30277796	30277797	ULK4P3	89837	-118137	Non-CGI	FALSE	FALSE	TRUE
cg07897690	chr2	200328645	200328646	SATB2-AS1	150538	-4174	CGI	FALSE	TRUE	FALSE
cg04075191	chr2	115919785	115919786	LOC389023	389023	-864	CGI	TRUE	TRUE	FALSE
cg00515457	chr19	35396203	35396204	ZNF30	90075	-21602	CGI	TRUE	FALSE	FALSE
cg14839404	chr20	55841869	55841870	BMP7	655	-161	CGI	TRUE	FALSE	FALSE
cg23883058	chr2	5813866	5813867	SOX11	6664	-18931	CGI	FALSE	FALSE	TRUE
cg10495047	chr5	139017667	139017668	CXXC5	51523	-10632	CGI	FALSE	FALSE	TRUE
cg09142313	chr5	72677859	72677860	BTF3	689	-116389	CGI	FALSE	FALSE	TRUE
cg19730691	chr1	119526437	119526438	TBX15	6913	5740	CGI	FALSE	TRUE	FALSE
cg01126567	chr16	20085047	20085048	GPR139	124274	51	CGI	TRUE	FALSE	FALSE
cg17508941	chr7	19183280	19183281	FERD3L	222894	1762	CGI	TRUE	FALSE	FALSE
cg26364205	chr3	96533824	96533825	EPHA6	285220	398	CGI	TRUE	FALSE	FALSE
cg07394446	chr15	100881458	100881459	ADAMTS17	170691	723	CGI	FALSE	TRUE	FALSE
cg03506640	chr14	85997753	85997754	FLRT2	23768	1264	CGI	TRUE	TRUE	FALSE
cg27205687	chr11	106888787	106888788	GUCY1A2	2977	382	CGI	TRUE	FALSE	FALSE
cg06445348	chr1	166917009	166917010	ILDR2	387597	27550	CGI	FALSE	TRUE	FALSE
cg24740218	chr12	114075947	114075948	LHX5	64211	-166069	CGI	FALSE	FALSE	TRUE
cg24851854	chr1	59042275	59042276	TACSTD2	4070	889	CGI	TRUE	FALSE	FALSE
cg01663016	chr5	168727752	168727753	SLIT3	6586	379	CGI	TRUE	FALSE	FALSE
cg27024876	chr19	49867109	49867110	DKKL1	27120	121	CGI	TRUE	FALSE	FALSE
cg06027807	chr8	61325312	61325313	RAB2A	5862	-104155	CGI	FALSE	TRUE	FALSE
cg00960305	chr20	22558297	22558298	LINC00261	140828	981	CGI	FALSE	TRUE	FALSE
cg23944804	chr20	11871384	11871385	BTBD3	22903	-91	CGI	TRUE	FALSE	FALSE
cg27067781	chr6	32116853	32116854	PRRT1	80863	4005	CGI	FALSE	TRUE	FALSE
cg21318213	chr15	96875591	96875592	MIR1469	100302258	-897	CGI	TRUE	TRUE	FALSE
cg26886462	chr5	155108449	155108450	SGCD	6444	-26612	CGI	FALSE	FALSE	TRUE
cg12738197	chr8	125985883	125985884	ZNF572	137209	343	CGI-S-Shore	FALSE	TRUE	FALSE
cg07137845	chr3	170136485	170136486	CLDN11	5010	-166	CGI	TRUE	FALSE	FALSE
cg06634716	chr1	217311151	217311152	ESRRG	2104	-53	CGI	TRUE	FALSE	FALSE
cg06822816	chr8	120220882	120220883	MAL2	114569	271	CGI	FALSE	TRUE	FALSE
cg16590794	chr18	10032466	10032467	VAPA	9218	118510	CGI	FALSE	FALSE	TRUE
cg09221867	chr4	134071663	134071664	PCDH10	57575	1192	CGI	TRUE	FALSE	FALSE
cg21449170	chr7	130419062	130419063	KLF14	136259	-173	CGI	TRUE	FALSE	FALSE
cg01133215	chr6	45399681	45399682	SUPT3H	8464	-54010	Non-CGI	FALSE	TRUE	FALSE
cg11353250	chr6	75794995	75794996	COL12A1	1303	120626	CGI	FALSE	TRUE	FALSE
cg01739725	chr14	38071393	38071394	FOXA1	3169	-6903	CGI	FALSE	FALSE	TRUE
cg26513192	chr1	94703378	94703379	ARHGAP29	9411	37244	CGI-S-Shore	TRUE	TRUE	FALSE
cg15731815	chr1	6269260	6269261	RNF207	388591	3070	CGI	FALSE	TRUE	FALSE
cg24719005	chr2	56150675	56150676	EFEMP1	2202	621	CGI	FALSE	TRUE	FALSE
cg22720041	chr19	44952725	44952726	ZNF229	7772	39	CGI	TRUE	FALSE	FALSE
cg24890054	chr2	18059752	18059753	KCNS3	3790	637	CGI	TRUE	TRUE	FALSE
cg03671597	chr17	27333463	27333464	SEZ6	124925	-4	CGI-S-Shore	TRUE	FALSE	FALSE
cg10253371	chr12	28124134	28124135	PTHLH	5744	780	CGI	TRUE	TRUE	FALSE
cg07766263	chr3	170303045	170303046	SLC7A14	57709	816	CGI-S-Shore	FALSE	TRUE	FALSE
cg03753331	chr2	115919006	115919007	LOC389023	389023	-85	CGI	TRUE	TRUE	FALSE
cg19237294	chr18	35065236	35065237	CELF4	56853	80762	CGI	FALSE	TRUE	FALSE
cg18956933	chr3	147136904	147136905	ZIC1	7545	9722	CGI	FALSE	FALSE	TRUE
cg14385245	chr15	83953765	83953766	BNC1	646	-296	CGI	TRUE	FALSE	FALSE
cg18587504	chr15	57598576	57598577	LOC283663	283663	6012	CGI-N-Shore	FALSE	TRUE	FALSE
cg01829241	chr4	8582249	8582250	CPZ	8532	31	CGI	TRUE	FALSE	FALSE
cg24731597	chr1	95392380	95392381	CNN3	1266	353	CGI	TRUE	TRUE	FALSE
cg17222500	chr12	85306741	85306742	SLC6A15	55117	-134	CGI	TRUE	FALSE	FALSE
cg13696942	chr11	20180666	20180667	DBX1	120237	1202	CGI	FALSE	TRUE	FALSE
cg21159778	chr9	117266918	117266919	DFNB31	25861	816	CGI	TRUE	FALSE	FALSE
cg21706229	chr17	70112877	70112878	SOX9	6662	-4282	CGI	TRUE	TRUE	FALSE
cg02908900	chr7	15726821	15726822	MEOX2	4223	-512	CGI	TRUE	FALSE	FALSE
cg03070297	chr10	128994603	128994604	FAM196A	642938	-180	CGI	TRUE	TRUE	FALSE
cg03209854	chr5	5140003	5140004	ADAMTS16	170690	-438	CGI	TRUE	FALSE	FALSE
cg06384763	chr19	12203198	12203199	ZNF788	388507	119	CGI	TRUE	FALSE	FALSE
cg17176573	chr11	120110887	120110888	POU2F3	25833	3537	CGI	TRUE	TRUE	FALSE
cg12233363	chr6	100913030	100913031	SIM1	6492	-224	CGI	TRUE	FALSE	FALSE
cg11097541	chr7	27208188	27208189	MIR196B	442920	992	CGI	FALSE	TRUE	FALSE
cg17007640	chr14	29243504	29243505	C14orf23	387978	1593	CGI	FALSE	TRUE	FALSE
cg11884933	chr7	2774414	2774415	AMZ1	155185	55250	CGI	FALSE	TRUE	FALSE
cg26048025	chr1	200843156	200843157	GPR25	2848	989	CGI	TRUE	FALSE	FALSE
cg08528626	chr2	107503728	107503729	ST6GAL2	84620	-164	CGI	TRUE	FALSE	FALSE
cg00334063	chr3	147106010	147106011	ZIC4	84107	18584	CGI-N-Shore	FALSE	TRUE	FALSE
cg10351914	chr17	19290690	19290691	MFAP4	4239	-157	Non-CGI	TRUE	FALSE	FALSE
cg22212691	chr2	220417868	220417869	MIR3132	100423039	-3998	CGI	FALSE	TRUE	FALSE
cg27120816	chr16	62070164	62070165	CDH8	1006	573	CGI	TRUE	FALSE	FALSE
cg23896164	chr21	38120518	38120519	SIM2	6493	48526	CGI	FALSE	TRUE	FALSE
cg08917478	chr5	50678633	50678634	ISL1	3670	-323	CGI	TRUE	FALSE	FALSE
cg11068946	chr10	134599151	134599152	NKX6-2	84504	384	CGI	TRUE	FALSE	FALSE
cg25744767	chr7	79764178	79764179	GNAI1	2770	37	CGI	TRUE	FALSE	FALSE
cg03506489	chr11	30038788	30038789	KCNA4	3739	-210	CGI	TRUE	FALSE	FALSE
cg04525757	chr14	29235973	29235974	FOXG1	2290	-312	CGI-S-Shore	TRUE	FALSE	FALSE
cg10602282	chr7	155580322	155580323	SHH	6469	24643	CGI	FALSE	FALSE	TRUE
cg00595237	chr8	11560763	11560764	GATA4	2626	26294	CGI	TRUE	TRUE	FALSE
cg17187287	chr4	115519593	115519594	UGT8	7368	-16	CGI	TRUE	FALSE	FALSE
cg03606215	chr4	22517623	22517624	GPR125	166647	47	CGI	TRUE	FALSE	FALSE
cg03391684	chr1	14925524	14925525	KAZN	23254	310	CGI	TRUE	FALSE	FALSE
cg16846645	chr2	14773973	14773974	FAM84A	151354	1162	CGI	TRUE	TRUE	FALSE
cg00048759	chr7	99775422	99775423	STAG3	10734	-114	CGI	TRUE	FALSE	FALSE
cg13408086	chr9	140221397	140221398	NRARP	441478	-24693	CGI	FALSE	TRUE	FALSE
cg15835232	chr17	53343075	53343076	HLF	3131	753	CGI	TRUE	TRUE	FALSE
cg21126583	chr7	145813421	145813422	CNTNAP2	26047	-30	CGI	TRUE	FALSE	FALSE
cg14419975	chr1	91196332	91196333	BARHL2	343472	-13537	CGI	FALSE	FALSE	TRUE
cg26625518	chr3	64430790	64430791	PRICKLE2	166336	-219658	CGI	FALSE	FALSE	TRUE
cg03727202	chr15	53075718	53075719	ONECUT1	3175	6489	CGI	FALSE	TRUE	FALSE
cg20098887	chr6	146864520	146864521	RAB32	10981	-306	CGI	TRUE	FALSE	FALSE
cg11667020	chr20	21378045	21378046	NKX2-4	644524	0	CGI	TRUE	FALSE	FALSE
cg22147660	chr18	5895006	5895007	TMEM200C	645369	-2902	CGI	FALSE	FALSE	TRUE
cg04536893	chr16	65155141	65155142	CDH11	1009	776	CGI	FALSE	TRUE	FALSE
cg07194093	chr18	7566558	7566559	PTPRM	5797	-754	CGI-N-Shore	TRUE	FALSE	FALSE
cg06151243	chr17	5000872	5000873	USP6	9098	-18859	CGI	FALSE	FALSE	TRUE
cg25495650	chr7	633202	633203	FLJ44511	441307	73173	CGI	FALSE	TRUE	FALSE
cg09208611	chr12	63544319	63544320	AVPR1A	552	2269	CGI	TRUE	FALSE	FALSE
cg25439496	chr6	85484627	85484628	TBX18	9096	-10727	CGI	FALSE	FALSE	TRUE
cg06334284	chr1	57044991	57044992	PPAP2B	8613	264	CGI	TRUE	FALSE	FALSE
cg10633658	chr6	58147525	58147526	GUSBP4	375513	140197	CGI	TRUE	FALSE	FALSE
cg12204732	chr10	128994605	128994606	FAM196A	642938	-182	CGI	TRUE	TRUE	FALSE
cg02942845	chr8	75897115	75897116	CRISPLD1	83690	406	CGI	TRUE	FALSE	FALSE
cg10127490	chr3	15563072	15563073	COLQ	8292	184	Non-CGI	TRUE	TRUE	FALSE
cg04854328	chr5	92914828	92914829	FLJ42709	441094	2173	CGI	FALSE	TRUE	FALSE
cg24927800	chr2	220283214	220283215	DES	1674	114	CGI	TRUE	FALSE	FALSE
cg12041848	chr20	45523294	45523295	EYA2	2139	30	CGI	TRUE	FALSE	FALSE
cg20067049	chr2	121345149	121345150	LOC84931	84931	-121223	CGI-S-Shore	FALSE	FALSE	TRUE
cg06544405	chr18	70536807	70536808	NETO1	81832	-1996	CGI	TRUE	FALSE	FALSE
cg04306063	chr5	76249502	76249503	CRHBP	1393	821	CGI	FALSE	TRUE	FALSE
cg21319458	chr2	160472940	160472941	BAZ2B	29994	96004	CGI-S-Shore	TRUE	TRUE	FALSE
cg02719752	chr3	62861245	62861246	CADPS	8618	-180	CGI	TRUE	FALSE	FALSE
cg07892785	chr3	39851788	39851789	MYRIP	25924	484	CGI	TRUE	TRUE	FALSE
cg15549927	chr7	153749756	153749757	DPP6	1804	165336	CGI	TRUE	TRUE	FALSE
cg15543566	chr4	87515467	87515468	PTPN13	5783	0	CGI	TRUE	FALSE	FALSE
cg15373239	chr10	119303225	119303226	EMX2	2018	1268	CGI	TRUE	TRUE	FALSE
cg26650638	chr16	86320857	86320858	LOC146513	146513	819	CGI	FALSE	TRUE	FALSE
cg08169778	chr11	115846336	115846337	LOC283143	283143	-214990	CGI-N-Shore	FALSE	FALSE	TRUE
cg08432727	chr2	5831722	5831723	SOX11	6664	-1075	CGI	TRUE	FALSE	FALSE
cg21858380	chr2	119916486	119916487	C1QL2	165257	-14	CGI	TRUE	FALSE	FALSE
cg05915981	chr6	131571669	131571670	AKAP7	9465	114842	Non-CGI	TRUE	TRUE	FALSE
cg03544320	chr4	5894691	5894692	CRMP1	1400	92	CGI	TRUE	FALSE	FALSE
cg03088990	chr20	44540278	44540279	PLTP	5360	723	CGI	TRUE	TRUE	FALSE
cg16652063	chr17	6616653	6616654	SLC13A5	284111	85	CGI	TRUE	FALSE	FALSE
cg15426956	chr5	63802412	63802413	RGS7BP	401190	-38	CGI	TRUE	FALSE	FALSE
cg22541254	chr6	101846779	101846780	GRIK2	2898	109	CGI-N-Shore	TRUE	TRUE	FALSE
cg02328239	chr5	37837463	37837464	GDNF	2668	2317	CGI	TRUE	TRUE	FALSE
cg23397578	chr19	37742925	37742926	LOC284412	284412	16985	CGI	TRUE	FALSE	FALSE
cg13539545	chr14	60973823	60973824	SIX6	4990	-2113	CGI	FALSE	FALSE	TRUE
cg18500988	chr4	54959708	54959709	GSX2	170825	-6538	CGI	FALSE	TRUE	FALSE
cg25317585	chr13	102568886	102568887	MIR2681	100616110	51208	CGI	TRUE	TRUE	FALSE
cg11842610	chr10	118033762	118033763	GFRA1	2674	-635	CGI	TRUE	FALSE	FALSE
cg03637815	chr13	95359718	95359719	SOX21	11166	4669	CGI	FALSE	FALSE	TRUE
cg09336320	chr5	175224635	175224636	CPLX2	10814	1024	CGI	FALSE	TRUE	FALSE
cg02677946	chr11	132864357	132864358	OPCML	4978	538044	CGI-S-Shore	FALSE	TRUE	FALSE
cg26115633	chr10	129535893	129535894	FOXI2	399823	354	CGI	TRUE	FALSE	FALSE
cg05166490	chr8	41754172	41754173	ANK1	286	106	CGI	TRUE	FALSE	FALSE
cg16803083	chr18	33530342	33530343	C18orf21	83608	-22244	CGI	FALSE	FALSE	TRUE
cg22344727	chr12	81102035	81102036	MYF6	4618	626	CGI	FALSE	TRUE	FALSE
cg04485799	chr22	50438356	50438357	IL17REL	400935	12697	CGI	FALSE	TRUE	FALSE
cg26357587	chr11	120110882	120110883	POU2F3	25833	3532	CGI	TRUE	TRUE	FALSE
cg02741521	chr3	9745610	9745611	CPNE9	151835	99	CGI	TRUE	FALSE	FALSE
cg06577205	chr5	15500714	15500715	FBXL7	23194	408	CGI	TRUE	FALSE	FALSE
cg09938511	chr8	77590322	77590323	ZFHX4	79776	-3191	CGI	FALSE	TRUE	FALSE
cg27615578	chr19	7953281	7953282	LRRC8E	80131	-107	CGI-N-Shore	TRUE	FALSE	FALSE
cg13566648	chr6	12750030	12750031	PHACTR1	221692	32992	CGI	FALSE	TRUE	FALSE
cg03084724	chr10	125853232	125853233	CHST15	51363	-25	CGI	TRUE	FALSE	FALSE
cg05994320	chr7	113727753	113727754	FOXP2	93986	1387	CGI	FALSE	TRUE	FALSE
cg23649435	chr4	184826421	184826422	STOX2	56977	-86	CGI	TRUE	FALSE	FALSE
cg05385513	chr2	56150478	56150479	EFEMP1	2202	818	CGI	FALSE	TRUE	FALSE
cg18557131	chr13	100624207	100624208	ZIC5	85416	-28	CGI	TRUE	FALSE	FALSE
cg04347874	chr14	36987408	36987409	SFTA3	253970	1407	CGI	TRUE	TRUE	FALSE
cg22169990	chr7	150786051	150786052	AGAP3	116988	3096	CGI-S-Shore	FALSE	TRUE	FALSE
cg18468354	chr14	36993517	36993518	NKX2-1	7080	-4086	CGI-S-Shore	FALSE	FALSE	TRUE
cg16768018	chr3	147108843	147108844	ZIC4	84107	15751	CGI	FALSE	TRUE	FALSE
cg24198558	chr3	132757102	132757103	TMEM108	66000	-67	CGI	TRUE	FALSE	FALSE
cg08190858	chr12	54321346	54321347	HOXC13	3229	-11228	CGI	FALSE	FALSE	TRUE
cg01711160	chr14	85996499	85996500	FLRT2	23768	10	CGI	TRUE	FALSE	FALSE
cg00569447	chr5	50695224	50695225	ISL1	3670	16265	CGI-S-Shore	FALSE	FALSE	TRUE
cg14717170	chr3	164914471	164914472	SLITRK3	22865	-1	CGI-S-Shore	TRUE	FALSE	FALSE
cg27652459	chr11	46709238	46709239	ARHGAP1	392	12880	Non-CGI	FALSE	TRUE	FALSE
cg20688709	chr1	236227534	236227535	NID1	4811	945	CGI	TRUE	TRUE	FALSE
cg17538572	chr10	94834763	94834764	CYP26A1	1592	1530	CGI	FALSE	TRUE	FALSE
cg16218721	chr2	177017352	177017353	HOXD4	3233	1238	CGI	FALSE	TRUE	FALSE
cg14981137	chr5	50678697	50678698	ISL1	3670	-259	CGI	TRUE	FALSE	FALSE
cg02151625	chr6	166722060	166722061	PRR18	285800	-188	CGI	TRUE	FALSE	FALSE
cg20563910	chr5	174152033	174152034	MSX2	4488	457	CGI	TRUE	FALSE	FALSE
cg23304647	chr7	2778058	2778059	AMZ1	155185	58894	CGI-S-Shelf	FALSE	TRUE	FALSE
cg24933645	chr1	220101728	220101729	SLC30A10	55532	30259	CGI	TRUE	TRUE	FALSE
cg06962177	chr1	63785946	63785947	FOXD3	27022	-2782	CGI	FALSE	FALSE	TRUE
cg19375479	chr19	44952604	44952605	ZNF229	7772	160	CGI	TRUE	TRUE	FALSE
cg07489890	chr3	173115774	173115775	NLGN1	22871	-468	CGI	TRUE	FALSE	FALSE
cg23605843	chr1	26735630	26735631	LIN28A	79727	-1637	CGI-S-Shore	TRUE	FALSE	FALSE
cg25349154	chr18	5197559	5197560	C18orf42	642597	-303	CGI	TRUE	FALSE	FALSE
cg25382400	chr3	181445514	181445515	SOX2	6657	15801	CGI	FALSE	TRUE	FALSE
cg06598836	chr3	2140699	2140700	CNTN4	152330	148	CGI	FALSE	TRUE	FALSE
cg19403014	chr2	48982950	48982951	LHCGR	3973	-69	CGI-S-Shore	TRUE	TRUE	FALSE
cg14625113	chr12	41086680	41086681	CNTN1	1272	321	CGI	FALSE	TRUE	FALSE
cg25532099	chr5	127874466	127874467	FBN2	2201	-549	CGI	TRUE	FALSE	FALSE
cg03146949	chr19	56879662	56879663	ZSCAN5A	79149	88	CGI	TRUE	TRUE	FALSE
cg20347882	chr7	155166554	155166555	INSIG1	3638	77067	CGI	FALSE	FALSE	TRUE
cg22588144	chr20	13200929	13200930	ISM1	140862	-1487	CGI	TRUE	FALSE	FALSE
cg17920479	chr20	44650246	44650247	SLC12A5	57468	-81	CGI	TRUE	FALSE	FALSE
cg26126806	chr17	17685031	17685032	SMCR5	140771	-2187	CGI-N-Shore	TRUE	TRUE	FALSE
cg26094554	chr17	36719654	36719655	SRCIN1	80725	42527	CGI	TRUE	TRUE	FALSE
cg10964367	chr8	1771973	1771974	ARHGEF10	9639	-174	CGI	TRUE	FALSE	FALSE
cg13561879	chr8	35092687	35092688	UNC5D	137970	-286	CGI-N-Shore	TRUE	FALSE	FALSE
cg22354782	chr1	115881132	115881133	NGF	4803	-274	CGI	TRUE	FALSE	FALSE
cg02078690	chr11	122852454	122852455	BSX	390259	-74	CGI	TRUE	FALSE	FALSE
cg24645214	chr8	54789978	54789979	RGS20	8601	25609	CGI	FALSE	TRUE	FALSE
cg18920097	chr15	35045695	35045696	GJD2	57369	992	CGI-N-Shore	TRUE	TRUE	FALSE
cg15868105	chr22	30116953	30116954	CABP7	164633	608	CGI	FALSE	TRUE	FALSE
cg05347965	chr17	55663256	55663257	MRPS23	51649	264175	Non-CGI	FALSE	TRUE	FALSE
cg10241484	chr16	62070219	62070220	CDH8	1006	518	CGI	TRUE	FALSE	FALSE
cg11410023	chr3	96533511	96533512	EPHA6	285220	85	CGI	TRUE	FALSE	FALSE
cg13321967	chr4	53617679	53617680	ERVMER34-1	100288413	126	CGI	TRUE	FALSE	FALSE
cg04985396	chr1	72749735	72749736	NEGR1	257194	-1329	CGI	TRUE	FALSE	FALSE
cg07035659	chr4	4859975	4859976	MSX1	4487	-1415	CGI	TRUE	FALSE	FALSE
cg15514380	chr21	38737243	38737244	DYRK1A	1859	-2614	CGI-N-Shore	FALSE	FALSE	TRUE
cg04543289	chr16	24267559	24267560	CACNG3	10368	684	CGI	TRUE	FALSE	FALSE
cg22721334	chr19	58609618	58609619	ZSCAN18	65982	20173	CGI	TRUE	TRUE	FALSE
cg26422161	chr6	1313211	1313212	FOXQ1	94234	535	CGI	TRUE	FALSE	FALSE
cg06105694	chr17	36585340	36585341	ARHGAP23	57636	619	CGI	FALSE	TRUE	FALSE
cg02105326	chr2	239149142	239149143	HES6	55502	-460	CGI	TRUE	FALSE	FALSE
cg01354961	chr7	8473462	8473463	NXPH1	30010	-121	CGI	TRUE	FALSE	FALSE
cg12149911	chr8	61194292	61194293	CA8	767	-337	CGI	TRUE	FALSE	FALSE
cg00260802	chr20	21372203	21372204	NKX2-4	644524	5842	CGI	FALSE	FALSE	TRUE
cg14606067	chr22	18593816	18593817	TUBA8	51807	362	CGI	FALSE	TRUE	FALSE
cg09624466	chr14	57278710	57278711	OTX2-AS1	100309464	-12	CGI	TRUE	FALSE	FALSE
cg05319305	chr4	101111927	101111928	DDIT4L	115265	-271	CGI	TRUE	FALSE	FALSE
cg07206208	chr10	25464165	25464166	GPR158	57512	-123	CGI	TRUE	TRUE	FALSE
cg05057720	chr14	38724675	38724676	CLEC14A	161198	897	CGI	TRUE	FALSE	FALSE
cg02286091	chr5	78407678	78407679	BHMT	635	73	CGI	TRUE	FALSE	FALSE
cg20340302	chr20	55841149	55841150	BMP7	655	556	CGI	TRUE	FALSE	FALSE
cg00911794	chr17	1962132	1962133	HIC1	3090	4683	CGI	FALSE	TRUE	FALSE
cg13016408	chr2	133426298	133426299	LYPD1	116372	2770	CGI	FALSE	TRUE	FALSE
cg23954268	chr5	172672454	172672455	NKX2-5	1482	-10138	CGI	FALSE	FALSE	TRUE
cg04143876	chr15	76639558	76639559	ISL2	64843	10410	CGI	FALSE	FALSE	TRUE
cg05167251	chr2	176987465	176987466	HOXD9	3235	51	CGI	TRUE	FALSE	FALSE
cg10621825	chr6	125283953	125283954	RNF217	154214	90	CGI	TRUE	TRUE	FALSE
cg08537367	chr16	87469199	87469200	MAP1LC3B	81631	43397	CGI	FALSE	TRUE	FALSE
cg09651145	chr5	148651144	148651145	AFAP1L1	134265	-255	CGI	TRUE	FALSE	FALSE
cg17078427	chr3	170137552	170137553	CLDN11	5010	898	CGI	TRUE	TRUE	FALSE
cg11199713	chr13	112721773	112721774	SOX1	6656	-138	CGI	TRUE	FALSE	FALSE
cg26542254	chr7	79082291	79082292	MAGI2-AS3	100505881	17	CGI	TRUE	TRUE	FALSE
cg17525102	chr14	29236221	29236222	FOXG1	2290	-64	CGI	TRUE	FALSE	FALSE
cg18384778	chr19	57618136	57618137	USP29	57663	-13371	CGI	FALSE	FALSE	TRUE
cg05860723	chr12	81102486	81102487	MYF6	4618	1077	CGI	FALSE	TRUE	FALSE
cg02008154	chr7	35293537	35293538	TBX20	57057	172	CGI	TRUE	FALSE	FALSE
cg01734112	chr2	26624760	26624761	CCDC164	92749	-22	CGI	TRUE	FALSE	FALSE
cg14335275	chr2	150186921	150186922	LYPD6	130574	421	CGI	TRUE	TRUE	FALSE
[truncated: 61,514 more rows]

## Sheet: glia
Supplemental Table 4: List of CpG sites hypermethylated in glia during aging
Target ID	Chromosome	start	end	nearest.gene	nearest.gene.id	disttotss	hmm.cpgi	prom.reg	intra.reg	inter.reg
cg00003994	chr7	15725862	15725863	MEOX2	4223	444	CGI-S-Shore	TRUE	FALSE	FALSE
cg00004806	chr6	161558105	161558106	AGPAT4-IT1	79992	24907	Non-CGI	FALSE	TRUE	FALSE
cg00007076	chr8	67342600	67342601	RRS1	23212	1336	CGI-S-Shore	TRUE	FALSE	FALSE
cg00008033	chr19	52429980	52429981	ZNF613	79898	-706	CGI-N-Shore	TRUE	FALSE	FALSE
cg00010078	chr2	109967172	109967173	MIR4266	100423027	-37090	Non-CGI	FALSE	TRUE	FALSE
cg00011239	chr2	20876220	20876221	GDF7	151449	9795	Non-CGI	FALSE	FALSE	TRUE
cg00013369	chr1	192857594	192857595	RGS2	5997	79424	Non-CGI	FALSE	FALSE	TRUE
cg00015530	chr8	145052950	145052951	PLEC	5339	-2036	CGI-S-Shore	FALSE	TRUE	FALSE
cg00017461	chr22	30663316	30663317	OSM	5008	-486	CGI-S-Shore	TRUE	FALSE	FALSE
cg00017931	chr6	157932180	157932181	MIR3692	100500899	-17982	CGI	FALSE	TRUE	FALSE
cg00023726	chr1	2839935	2839936	ACTRT2	140625	-98109	CGI	FALSE	FALSE	TRUE
cg00026290	chr4	10686554	10686555	CLNK	116449	-167	Non-CGI	TRUE	FALSE	FALSE
cg00028056	chr2	220407171	220407172	TMEM198	130612	-1212	CGI-S-Shore	TRUE	TRUE	FALSE
cg00028678	chr2	131674175	131674176	ARHGEF4	50649	1388	CGI	TRUE	FALSE	FALSE
cg00030005	chr7	155129409	155129410	INSIG1	3638	39922	CGI-N-Shore	FALSE	FALSE	TRUE
cg00030422	chr3	38080704	38080705	DLEC1	9940	7	CGI	TRUE	FALSE	FALSE
cg00032205	chr8	98290372	98290373	TSPYL5	85453	-195	CGI	TRUE	FALSE	FALSE
cg00033909	chr7	9674902	9674903	PER4	168741	1001	Non-CGI	TRUE	FALSE	FALSE
cg00034076	chr8	85096037	85096038	RALYL	138046	583	CGI	TRUE	TRUE	FALSE
cg00034336	chr2	8684126	8684127	ID2	3398	-137985	CGI-N-Shore	FALSE	FALSE	TRUE
cg00034755	chr22	50918361	50918362	ADM2	79924	-1622	CGI-N-Shore	TRUE	FALSE	FALSE
cg00035316	chr2	176993017	176993018	HOXD8	3234	-1403	CGI	TRUE	FALSE	FALSE
cg00035969	chr1	112159097	112159098	LOC100129269	100129269	-8156	CGI-N-Shelf	FALSE	TRUE	FALSE
cg00037681	chr12	47610371	47610372	PCED1B-AS1	100233209	-144	Non-CGI	TRUE	TRUE	FALSE
cg00037763	chr18	42281763	42281764	SETBP1	26040	21624	Non-CGI	FALSE	TRUE	FALSE
cg00038736	chr19	38877134	38877135	GGN	199720	1532	CGI	FALSE	TRUE	FALSE
cg00041401	chr1	114414408	114414409	PTPN22	26191	-32	Non-CGI	TRUE	TRUE	FALSE
cg00041989	chr17	55828038	55828039	MRPS23	51649	99393	CGI-N-Shore	FALSE	FALSE	TRUE
cg00043005	chr19	2227429	2227430	MIR1227	100302283	6717	CGI	FALSE	TRUE	FALSE
cg00045607	chr1	161039690	161039691	ARHGAP30	257106	68	Non-CGI	TRUE	FALSE	FALSE
cg00045902	chr10	134222218	134222219	PWWP2B	170394	11515	CGI	FALSE	TRUE	FALSE
cg00046499	chr3	154146183	154146184	GPR149	344758	1319	CGI	FALSE	TRUE	FALSE
cg00052964	chr2	85135823	85135824	TMSB10	9168	3059	CGI-S-Shore	FALSE	FALSE	TRUE
cg00054210	chr8	65711644	65711645	CYP7B1	9420	-295	CGI	TRUE	FALSE	FALSE
cg00054496	chr16	10855688	10855689	NUBP1	4682	17989	CGI-N-Shore	FALSE	TRUE	FALSE
cg00056257	chr3	6901652	6901653	GRM7	2917	-1148	CGI-N-Shore	TRUE	FALSE	FALSE
cg00056541	chr6	164288623	164288624	QKI	9444	452947	CGI	FALSE	FALSE	TRUE
cg00056754	chr1	167063958	167063959	DUSP27	92235	-111	Non-CGI	TRUE	FALSE	FALSE
cg00057966	chr17	56408694	56408695	MIR142	406934	-14	Non-CGI	TRUE	TRUE	FALSE
cg00059225	chr5	151304357	151304358	GLRA1	2741	38	CGI	TRUE	FALSE	FALSE
cg00061185	chr12	50596347	50596348	MIR1293	100302220	31646	Non-CGI	TRUE	TRUE	FALSE
cg00061695	chr17	7311314	7311315	NLGN2	57555	-186	CGI-N-Shore	TRUE	FALSE	FALSE
cg00063006	chr6	32847530	32847531	LOC100294145	100294145	-14421	CGI	FALSE	FALSE	TRUE
cg00063471	chr15	51385970	51385971	TNFAIP8L3	388121	11501	CGI	FALSE	TRUE	FALSE
cg00066351	chr7	150130551	150130552	LOC285972	285972	-189	Non-CGI	TRUE	FALSE	FALSE
cg00068155	chr3	131754131	131754132	CPNE4	131034	250121	CGI	TRUE	TRUE	FALSE
cg00069242	chr14	23450527	23450528	AJUBA	84962	1319	CGI	TRUE	FALSE	FALSE
cg00069642	chr5	141062490	141062491	ARAP3	64411	-689	CGI-S-Shore	TRUE	FALSE	FALSE
cg00073549	chr16	87609078	87609079	JPH3	57338	-26361	Non-CGI	FALSE	FALSE	TRUE
cg00075967	chr15	74495354	74495355	STRA6	64220	6690	Non-CGI	TRUE	TRUE	FALSE
cg00076774	chr2	45016971	45016972	SIX3	6496	-152064	Non-CGI	FALSE	FALSE	TRUE
cg00079563	chr22	43253521	43253522	ARFGAP3	26286	-112	CGI	TRUE	FALSE	FALSE
cg00081087	chr7	34873912	34873913	NPSR1-AS1	404744	37280	Non-CGI	TRUE	TRUE	FALSE
cg00082140	chr5	179816766	179816767	GFPT2	9945	-36450	CGI	FALSE	FALSE	TRUE
cg00083188	chr10	79314844	79314845	KCNMA1	3778	82731	Non-CGI	FALSE	TRUE	FALSE
cg00085123	chr2	8723906	8723907	ID2	3398	-98205	CGI	FALSE	FALSE	TRUE
cg00085619	chr7	155252748	155252749	EN2	2020	1923	CGI	FALSE	TRUE	FALSE
cg00087546	chr1	3308286	3308287	ARHGEF16	27237	-62859	CGI	FALSE	TRUE	FALSE
cg00088042	chr10	103892309	103892310	PPRC1	23082	-476	CGI-N-Shore	TRUE	FALSE	FALSE
cg00089453	chr5	150003037	150003038	SYNPO	11346	22394	CGI-N-Shore	FALSE	TRUE	FALSE
cg00092235	chr17	70154920	70154921	SOX9	6662	37758	Non-CGI	FALSE	FALSE	TRUE
cg00092400	chr12	51788285	51788286	GALNT6	11226	-2883	CGI-S-Shore	FALSE	TRUE	FALSE
cg00092518	chr13	50070550	50070551	PHF11	51131	748	CGI	TRUE	TRUE	FALSE
cg00093433	chr16	85981310	85981311	IRF8	3394	48535	CGI-N-Shore	FALSE	FALSE	TRUE
cg00094518	chr7	130418549	130418550	KLF14	136259	337	CGI	TRUE	FALSE	FALSE
cg00096536	chr4	154711906	154711907	SFRP2	6423	-1677	CGI	TRUE	FALSE	FALSE
cg00098819	chr6	168615442	168615443	DACT2	168002	104958	CGI	FALSE	FALSE	TRUE
cg00102731	chr20	2729245	2729246	CPXM1	56265	52045	CGI-N-Shore	FALSE	TRUE	FALSE
cg00105628	chr20	21087165	21087166	PLK1S1	55857	-19457	CGI	FALSE	FALSE	TRUE
cg00110545	chr10	6625489	6625490	PRKCQ-AS1	439949	3101	CGI-S-Shelf	FALSE	TRUE	FALSE
cg00111977	chr10	75401236	75401237	MYOZ1	58529	277	Non-CGI	TRUE	FALSE	FALSE
cg00117651	chr22	45809523	45809524	SMC1B	27127	-22	CGI	TRUE	FALSE	FALSE
cg00119811	chr5	73092353	73092354	ARHGEF28	64283	170369	Non-CGI	FALSE	TRUE	FALSE
cg00121255	chr6	114844832	114844833	HS3ST5	222537	-181291	Non-CGI	FALSE	FALSE	TRUE
cg00123762	chr6	41343697	41343698	NCR2	9436	40168	CGI	FALSE	FALSE	TRUE
cg00124175	chr20	17950611	17950612	MGME1	92667	848	CGI-S-Shore	TRUE	TRUE	FALSE
cg00125744	chr3	66008776	66008777	MAGI1	9223	15731	Non-CGI	FALSE	TRUE	FALSE
cg00127150	chr22	22862144	22862145	ZNF280B	140883	1359	CGI-N-Shore	TRUE	TRUE	FALSE
cg00130808	chr15	37178909	37178910	LOC145845	145845	-174	CGI-N-Shore	TRUE	FALSE	FALSE
cg00132972	chr2	219864146	219864147	MIR375	494324	2282	CGI-S-Shelf	FALSE	FALSE	TRUE
cg00134295	chr12	9269178	9269179	A2M	2	-619	Non-CGI	TRUE	FALSE	FALSE
cg00135399	chr4	7783873	7783874	AFAP1-AS1	84740	28055	Non-CGI	FALSE	TRUE	FALSE
cg00135497	chr4	155661849	155661850	LRAT	9227	-3301	CGI	FALSE	TRUE	FALSE
cg00140447	chr7	128580709	128580710	IRF5	3663	2939	CGI-S-Shore	TRUE	TRUE	FALSE
cg00141162	chr3	121379777	121379778	HCLS1	3059	12	Non-CGI	TRUE	FALSE	FALSE
cg00141308	chr22	44725065	44725066	KIAA1644	85352	-16333	CGI-N-Shore	FALSE	FALSE	TRUE
cg00143364	chr17	78605344	78605345	RPTOR	57521	86718	CGI-N-Shore	FALSE	TRUE	FALSE
cg00143527	chr15	81292171	81292172	MESDC1	59274	-1122	CGI-N-Shore	TRUE	FALSE	FALSE
cg00149213	chr1	160617124	160617125	SLAMF1	6504	-42	Non-CGI	TRUE	FALSE	FALSE
cg00152646	chr22	27014548	27014549	CRYBB1	1414	-556	Non-CGI	TRUE	FALSE	FALSE
cg00153306	chr3	46741492	46741493	TMIE	259236	-1329	CGI-N-Shore	TRUE	FALSE	FALSE
cg00156194	chr11	63330918	63330919	HRASLS2	54979	-62	Non-CGI	TRUE	FALSE	FALSE
cg00157796	chr6	159590231	159590232	FNDC1	84624	-196	CGI	TRUE	FALSE	FALSE
cg00157962	chr1	109102212	109102213	FAM102B	284611	-757	CGI-N-Shore	TRUE	FALSE	FALSE
cg00159243	chr12	109023799	109023800	SELPLG	6404	3869	Non-CGI	FALSE	TRUE	FALSE
cg00160981	chr1	161691911	161691912	FCRLB	127943	576	CGI-N-Shelf	TRUE	TRUE	FALSE
cg00164898	chr22	50709127	50709128	MAPK11	5600	211	CGI-S-Shore	TRUE	FALSE	FALSE
cg00166343	chr17	29150100	29150101	CRLF3	51379	1676	CGI-N-Shore	FALSE	TRUE	FALSE
cg00167670	chr4	13922944	13922945	LOC152742	152742	-190646	Non-CGI	FALSE	TRUE	FALSE
cg00168942	chr10	35894430	35894431	GJD4	219770	91	CGI-N-Shelf	TRUE	FALSE	FALSE
cg00169122	chr16	89488963	89488964	ANKRD11	29123	68004	CGI-S-Shore	FALSE	TRUE	FALSE
cg00169897	chr16	89098782	89098783	CBFA2T3	863	-55277	CGI-N-Shore	FALSE	FALSE	TRUE
cg00172603	chr1	54822031	54822032	SSBP3	23648	50059	CGI	FALSE	TRUE	FALSE
cg00175838	chr6	31695027	31695028	DDAH2	23564	3010	CGI-N-Shore	FALSE	TRUE	FALSE
cg00177496	chr3	197283127	197283128	BDH1	622	17065	CGI	TRUE	TRUE	FALSE
cg00179940	chr12	126978053	126978054	LOC100128554	100128554	51025	Non-CGI	FALSE	FALSE	TRUE
cg00184452	chr1	50887477	50887478	DMRTA2	63950	1640	CGI-S-Shore	TRUE	TRUE	FALSE
cg00184457	chr8	8946301	8946302	MIR4660	100616350	40345	Non-CGI	FALSE	FALSE	TRUE
cg00185336	chr7	73153699	73153700	ABHD11	83451	-508	CGI-S-Shore	TRUE	FALSE	FALSE
cg00186529	chr6	170452864	170452865	LOC154449	154449	118791	CGI	FALSE	FALSE	TRUE
cg00191458	chr5	169757859	169757860	LOC257358	257358	-574	Non-CGI	TRUE	FALSE	FALSE
cg00192220	chr16	48570215	48570216	N4BP1	9683	73903	Non-CGI	FALSE	FALSE	TRUE
cg00194126	chr2	157186312	157186313	NR4A2	4929	2973	CGI	TRUE	TRUE	FALSE
cg00194780	chr17	8172728	8172729	RANGRF	29098	-19239	Non-CGI	FALSE	TRUE	FALSE
cg00199399	chr8	49304043	49304044	EFCAB1	79645	343825	Non-CGI	FALSE	FALSE	TRUE
cg00200734	chr9	970379	970380	DMRT3	58524	-6583	CGI	FALSE	FALSE	TRUE
cg00201196	chr16	8738469	8738470	METTL22	79091	22941	CGI-N-Shore	TRUE	TRUE	FALSE
cg00201468	chr9	88137984	88137985	AGTPBP1	23287	218958	CGI	FALSE	FALSE	TRUE
cg00203913	chr17	13506186	13506187	HS3ST3A1	9955	-941	CGI-S-Shore	TRUE	FALSE	FALSE
cg00206490	chr16	89469729	89469730	LOC100287036	100287036	82187	CGI	FALSE	TRUE	FALSE
cg00210271	chr12	54088934	54088935	ATP5G2	517	-18421	CGI	FALSE	FALSE	TRUE
cg00211403	chr12	108525241	108525242	WSCD2	9671	1729	CGI-S-Shore	TRUE	TRUE	FALSE
cg00215182	chr1	22979495	22979496	C1QB	713	-185	Non-CGI	TRUE	FALSE	FALSE
cg00216138	chr15	37171175	37171176	LOC145845	145845	7557	CGI-S-Shore	FALSE	TRUE	FALSE
cg00221794	chr2	20776620	20776621	HS1BP3	64342	74242	Non-CGI	FALSE	FALSE	TRUE
cg00223136	chr5	3609364	3609365	IRX1	79192	13195	CGI-S-Shelf	FALSE	FALSE	TRUE
cg00224471	chr5	169918864	169918865	KCNMB1	3779	-102225	Non-CGI	FALSE	TRUE	FALSE
cg00225765	chr4	5052464	5052465	STK32B	55351	-1061	CGI-N-Shore	TRUE	FALSE	FALSE
cg00228735	chr7	131304505	131304506	PODXL	5420	-63128	Non-CGI	FALSE	FALSE	TRUE
cg00231528	chr1	9714280	9714281	C1orf200	644997	362	CGI-S-Shore	TRUE	TRUE	FALSE
cg00233633	chr7	29153560	29153561	CHN2	1124	-32638	Non-CGI	FALSE	TRUE	FALSE
cg00234046	chr10	73169245	73169246	CDH23	64072	12553	Non-CGI	FALSE	TRUE	FALSE
cg00237391	chr6	35265643	35265644	DEF6	50619	47	CGI	TRUE	FALSE	FALSE
cg00240195	chr2	157184880	157184881	NR4A2	4929	4405	CGI	TRUE	TRUE	FALSE
cg00242031	chr5	174869880	174869881	DRD1	1812	1281	CGI-N-Shore	TRUE	TRUE	FALSE
cg00242035	chr11	47416358	47416359	SPI1	6688	-16230	CGI-N-Shore	FALSE	TRUE	FALSE
cg00245890	chr3	58574042	58574043	FAM107A	11170	39293	CGI-S-Shore	TRUE	TRUE	FALSE
cg00245896	chr4	8034100	8034101	AFAP1	60312	-92446	CGI-N-Shore	FALSE	TRUE	FALSE
cg00246386	chr20	2674548	2674549	EBF4	57593	1023	CGI	FALSE	TRUE	FALSE
cg00247571	chr13	50707065	50707066	DLEU2	8847	-7387	CGI	FALSE	TRUE	FALSE
cg00249383	chr16	2287763	2287764	DNASE1L2	1775	1338	CGI	FALSE	TRUE	FALSE
cg00249621	chr8	98290359	98290360	TSPYL5	85453	-182	CGI	TRUE	FALSE	FALSE
cg00252781	chr1	179334658	179334659	AXDND1	126859	-195	CGI-N-Shore	TRUE	FALSE	FALSE
cg00253658	chr16	54210496	54210497	IRX3	79191	109880	CGI-N-Shore	FALSE	FALSE	TRUE
cg00254017	chr5	56119093	56119094	MAP3K1	4214	8192	Non-CGI	FALSE	TRUE	FALSE
cg00255889	chr13	26586288	26586289	SHISA2	387914	38908	CGI-N-Shore	FALSE	TRUE	FALSE
cg00256046	chr1	217306763	217306764	ESRRG	2104	4332	CGI	FALSE	TRUE	FALSE
cg00259472	chr5	159625590	159625591	FABP6	2172	11215	Non-CGI	TRUE	TRUE	FALSE
cg00260201	chr17	46029581	46029582	PRR15L	79170	5527	Non-CGI	FALSE	TRUE	FALSE
cg00262054	chr17	27491416	27491417	MYO18A	399687	15989	CGI-N-Shore	FALSE	TRUE	FALSE
cg00265360	chr17	1101278	1101279	ABR	29	-10661	CGI-N-Shelf	FALSE	FALSE	TRUE
cg00268086	chr17	5487376	5487377	NLRP1	22861	454	Non-CGI	TRUE	TRUE	FALSE
cg00268744	chr16	68281186	68281187	PLA2G15	23659	1938	CGI-S-Shore	FALSE	TRUE	FALSE
cg00275479	chr5	134882430	134882431	NEUROG1	4762	-10790	CGI-S-Shore	FALSE	FALSE	TRUE
cg00275828	chr17	39222690	39222691	KRTAP2-4	85294	-558	Non-CGI	TRUE	FALSE	FALSE
cg00278359	chr6	30652829	30652830	PPP1R18	170954	2841	CGI-N-Shore	TRUE	TRUE	FALSE
cg00278517	chr6	167070616	167070617	MIR1913	100302141	-147694	CGI	FALSE	TRUE	FALSE
cg00282706	chr12	6055430	6055431	ANO2	57101	-31	CGI-S-Shore	TRUE	FALSE	FALSE
cg00285620	chr11	102147694	102147695	BIRC3	330	-40485	Non-CGI	FALSE	FALSE	TRUE
cg00286125	chr19	36246906	36246907	HSPB6	126393	1022	CGI	TRUE	TRUE	FALSE
cg00287773	chr5	139594619	139594620	CYSTM1	84418	39965	Non-CGI	FALSE	TRUE	FALSE
cg00287915	chr5	1503595	1503596	LPCAT1	79888	20479	CGI	FALSE	TRUE	FALSE
cg00290023	chr5	174962968	174962969	SFXN1	94081	57453	CGI-S-Shore	FALSE	FALSE	TRUE
cg00290355	chr3	150996599	150996600	P2RY14	9934	-368	Non-CGI	TRUE	TRUE	FALSE
cg00290994	chr1	41848739	41848740	EDN2	1907	101603	CGI	FALSE	FALSE	TRUE
cg00291213	chr21	36398056	36398057	RUNX1-IT1	80215	13665	CGI-N-Shore	FALSE	TRUE	FALSE
cg00291478	chr10	121301041	121301042	RGS10	6001	1179	CGI-N-Shore	FALSE	TRUE	FALSE
cg00291837	chr1	55460884	55460885	BSND	7809	-3731	CGI-N-Shore	FALSE	FALSE	TRUE
cg00292135	chr7	156433068	156433069	C7orf13	129790	278	CGI	TRUE	TRUE	FALSE
cg00292312	chr1	7318138	7318139	CAMTA1	23261	472753	CGI-N-Shore	FALSE	TRUE	FALSE
cg00294149	chr16	75604552	75604553	GABARAPL2	11345	4302	CGI-S-Shelf	FALSE	TRUE	FALSE
cg00295780	chr1	243635800	243635801	MIR4677	100616343	126321	CGI-N-Shore	FALSE	TRUE	FALSE
cg00297721	chr20	55200767	55200768	TFAP2C	7022	-3589	CGI	FALSE	FALSE	TRUE
cg00297832	chr1	1565541	1565542	MMP23B	8510	-2017	CGI	FALSE	TRUE	FALSE
cg00299396	chr11	115483607	115483608	CADM1	23705	-108365	Non-CGI	FALSE	FALSE	TRUE
cg00299820	chr1	11943154	11943155	NPPB	4879	-24161	Non-CGI	FALSE	FALSE	TRUE
cg00302479	chr2	113931538	113931539	PSD4	23550	-20	Non-CGI	TRUE	FALSE	FALSE
cg00302494	chr2	237080354	237080355	GBX2	2637	-3701	CGI	FALSE	FALSE	TRUE
cg00303378	chr1	159825552	159825553	C1orf204	284677	-414	CGI	TRUE	TRUE	FALSE
cg00305193	chr1	26158583	26158584	LOC646471	646471	-8485	Non-CGI	FALSE	TRUE	FALSE
cg00306510	chr4	187003000	187003001	TLR3	7098	12690	Non-CGI	TRUE	TRUE	FALSE
cg00308914	chr5	17436715	17436716	LOC401177	401177	-49295	Non-CGI	FALSE	FALSE	TRUE
cg00311883	chr1	235099120	235099121	SNORA14B	677802	192130	Non-CGI	FALSE	TRUE	FALSE
cg00312553	chr5	157098553	157098554	C5orf52	100190949	-6	CGI	TRUE	FALSE	FALSE
cg00314115	chr2	121280002	121280003	LOC84931	84931	-56076	CGI	FALSE	FALSE	TRUE
cg00316080	chr3	124866646	124866647	HEG1	57493	-91843	Non-CGI	FALSE	TRUE	FALSE
cg00320288	chr16	85863167	85863168	COX4I1	1327	29993	CGI-S-Shelf	FALSE	FALSE	TRUE
cg00322919	chr10	17172000	17172001	CUBN	8029	-183	Non-CGI	TRUE	FALSE	FALSE
cg00327072	chr5	172110477	172110478	NEURL1B	54492	42200	CGI	FALSE	TRUE	FALSE
cg00327355	chr2	240884831	240884832	MIR4786	100616417	-2319	CGI	FALSE	FALSE	TRUE
cg00327577	chr16	31214993	31214994	PYCARD	29108	-895	CGI-S-Shore	TRUE	FALSE	FALSE
cg00328227	chr1	109204325	109204326	HENMT1	113802	-176	CGI	TRUE	FALSE	FALSE
cg00328284	chr8	41519119	41519120	MIR486	619554	-1092	CGI-N-Shore	TRUE	TRUE	FALSE
cg00331101	chr4	184949987	184949988	STOX2	56977	123477	Non-CGI	FALSE	FALSE	TRUE
cg00334063	chr3	147106010	147106011	ZIC4	84107	18584	CGI-N-Shore	FALSE	TRUE	FALSE
cg00335219	chr16	86012305	86012306	IRF8	3394	79530	CGI-S-Shore	FALSE	FALSE	TRUE
cg00335715	chr5	90575459	90575460	ARRDC3-AS1	100129716	-100703	CGI-N-Shore	FALSE	FALSE	TRUE
cg00335735	chr2	222355484	222355485	EPHA4	2043	81524	Non-CGI	FALSE	TRUE	FALSE
cg00335802	chr18	10791505	10791506	NAPG	8774	265631	Non-CGI	FALSE	TRUE	FALSE
cg00336669	chr12	4479842	4479843	FGF23	8074	9050	CGI	FALSE	TRUE	FALSE
cg00346392	chr16	87680424	87680425	JPH3	57338	44982	CGI-S-Shore	FALSE	TRUE	FALSE
cg00347757	chr13	20768560	20768561	GJB2	2706	-1445	CGI	TRUE	FALSE	FALSE
cg00349943	chr20	21500021	21500022	NKX2-2	4821	-5356	CGI	FALSE	FALSE	TRUE
cg00351443	chr10	105252720	105252721	NEURL	9148	-1013	CGI-N-Shore	TRUE	FALSE	FALSE
cg00352417	chr3	194408901	194408902	FAM43A	131583	2278	CGI	TRUE	FALSE	FALSE
cg00355804	chr12	117103567	117103568	C12orf49	79794	72274	CGI-S-Shelf	FALSE	FALSE	TRUE
cg00356208	chr16	55167581	55167582	IRX6	79190	-190888	Non-CGI	FALSE	FALSE	TRUE
cg00356694	chr17	4337202	4337203	SPNS3	201305	-15	Non-CGI	TRUE	FALSE	FALSE
cg00357532	chr2	183903743	183903744	NCKAP1	10787	-513	CGI-S-Shore	TRUE	FALSE	FALSE
cg00361495	chr7	28995458	28995459	LOC100506497	100506497	-24123	CGI	FALSE	TRUE	FALSE
cg00362657	chr21	44876670	44876671	LINC00319	284836	6765	CGI	FALSE	FALSE	TRUE
cg00365692	chr19	51670423	51670424	SIGLEC17P	284367	-160	Non-CGI	TRUE	FALSE	FALSE
cg00370106	chr6	159071106	159071107	SYTL3	94120	59	Non-CGI	TRUE	FALSE	FALSE
cg00373763	chr13	50908713	50908714	ST13P4	145165	162558	Non-CGI	FALSE	TRUE	FALSE
cg00379713	chr11	124940631	124940632	SLC37A2	219855	7617	Non-CGI	FALSE	TRUE	FALSE
cg00383081	chr1	182362088	182362089	GLUL	2752	-746	CGI-S-Shore	TRUE	FALSE	FALSE
cg00384539	chr8	70983567	70983568	PRDM14	63978	-4	CGI	TRUE	FALSE	FALSE
cg00387090	chr1	201615401	201615402	NAV1	89796	-2047	CGI-N-Shore	FALSE	FALSE	TRUE
cg00387658	chr20	54986793	54986794	CASS4	57091	-373	Non-CGI	TRUE	FALSE	FALSE
cg00387964	chr4	7651935	7651936	AFAP1-AS1	84740	-103880	CGI-N-Shore	FALSE	TRUE	FALSE
cg00396484	chr11	126414507	126414508	ST3GAL4	6484	188966	Non-CGI	FALSE	TRUE	FALSE
cg00400262	chr16	89917074	89917075	SPIRE2	84501	22166	CGI	FALSE	TRUE	FALSE
cg00404025	chr10	49892741	49892742	WDFY4	57705	-178	Non-CGI	TRUE	FALSE	FALSE
cg00404717	chr4	174912178	174912179	CEP44	80817	-292648	Non-CGI	FALSE	FALSE	TRUE
cg00410926	chr9	35563534	35563535	FAM166B	730112	360	Non-CGI	FALSE	TRUE	FALSE
cg00411411	chr10	103455165	103455166	FBXW4	6468	-421	CGI-S-Shore	TRUE	FALSE	FALSE
cg00415011	chr8	142046261	142046262	PTK2	5747	-34848	Non-CGI	FALSE	FALSE	TRUE
cg00416710	chr16	29196027	29196028	RRN3P2	653390	109863	CGI-N-Shore	FALSE	TRUE	FALSE
cg00417094	chr1	167417043	167417044	CD247	919	70802	Non-CGI	FALSE	TRUE	FALSE
cg00417288	chr12	4399998	4399999	CCND2	894	17095	CGI-S-Shore	FALSE	TRUE	FALSE
cg00421221	chr2	121106091	121106092	INHBB	3625	2371	CGI-S-Shore	FALSE	TRUE	FALSE
cg00424286	chr6	166887879	166887880	MIR1913	100302141	35040	CGI-N-Shelf	FALSE	TRUE	FALSE
cg00429268	chr20	48097073	48097074	KCNB1	3745	3415	CGI-N-Shore	FALSE	TRUE	FALSE
cg00429497	chr19	55945233	55945234	SHISA7	729956	8995	CGI-S-Shore	FALSE	TRUE	FALSE
cg00429683	chr17	78058778	78058779	GAA	2548	-16575	CGI	FALSE	TRUE	FALSE
cg00434119	chr3	186080868	186080869	DGKG	1608	-844	CGI-S-Shore	TRUE	FALSE	FALSE
cg00434461	chr5	92905860	92905861	FLJ42709	441094	11141	CGI-N-Shore	TRUE	TRUE	FALSE
cg00437360	chr17	14213579	14213580	MGC12916	84815	6521	CGI	FALSE	TRUE	FALSE
cg00440980	chr17	74639894	74639895	ST6GALNAC1	55808	0	Non-CGI	TRUE	FALSE	FALSE
cg00442389	chr6	32160074	32160075	PBX2	5089	-2110	CGI-S-Shelf	FALSE	TRUE	FALSE
cg00442646	chr6	159278649	159278650	OSTCP1	202459	13	Non-CGI	TRUE	FALSE	FALSE
cg00443981	chr17	58499679	58499680	C17orf64	124773	-184	CGI-S-Shore	TRUE	FALSE	FALSE
cg00444740	chr8	129162178	129162179	MIR1208	100302281	-182	Non-CGI	TRUE	FALSE	FALSE
cg00450164	chr1	209930127	209930128	TRAF3IP3	80342	732	Non-CGI	TRUE	TRUE	FALSE
cg00451397	chr2	48843645	48843646	GTF2A1L	11036	-1290	CGI-S-Shore	TRUE	TRUE	FALSE
cg00453193	chr7	115851050	115851051	TES	26136	502	CGI	TRUE	TRUE	FALSE
cg00453717	chr11	74344629	74344630	POLD3	10714	40999	Non-CGI	FALSE	TRUE	FALSE
cg00465958	chr7	156432526	156432527	C7orf13	129790	820	CGI	TRUE	TRUE	FALSE
cg00466136	chr11	131561778	131561779	NTM	50863	321406	CGI-S-Shore	FALSE	TRUE	FALSE
cg00466827	chr20	57465691	57465692	GNAS-AS1	149775	-39732	CGI	TRUE	TRUE	FALSE
cg00468125	chr10	134046066	134046067	DPYSL4	10570	45651	CGI	FALSE	TRUE	FALSE
cg00471059	chr5	179562620	179562621	RNF130	55819	-63510	CGI-N-Shore	FALSE	TRUE	FALSE
cg00474746	chr11	35684799	35684800	TRIM44	54765	445	CGI	TRUE	FALSE	FALSE
cg00477302	chr7	129411088	129411089	MIR182	406958	-755	Non-CGI	TRUE	FALSE	FALSE
cg00481951	chr3	187387650	187387651	SST	6750	549	CGI	FALSE	TRUE	FALSE
cg00488091	chr6	144536326	144536327	STX11	8676	64671	CGI-N-Shore	TRUE	FALSE	FALSE
cg00491255	chr16	58019984	58019985	TEPP	374739	9644	CGI	FALSE	TRUE	FALSE
cg00492070	chr3	107810716	107810717	CD47	961	-780	CGI	TRUE	FALSE	FALSE
cg00495443	chr22	17568163	17568164	IL17RA	23765	2311	CGI-S-Shore	FALSE	TRUE	FALSE
cg00498089	chr6	170585887	170585888	DLL1	28514	13808	CGI	FALSE	FALSE	TRUE
cg00498772	chr16	12184067	12184068	SNX29	92017	113464	CGI	FALSE	TRUE	FALSE
cg00501774	chr9	125132660	125132661	PTGS1	5742	-147	CGI-N-Shore	TRUE	FALSE	FALSE
cg00503383	chr1	91301651	91301652	BARHL2	343472	-118856	CGI	TRUE	TRUE	FALSE
cg00508575	chr12	90050967	90050968	ATP2B1	490	-1122	Non-CGI	TRUE	FALSE	FALSE
cg00509007	chr11	1781557	1781558	CTSD	1509	3663	CGI-N-Shore	FALSE	TRUE	FALSE
cg00509451	chr11	64811775	64811776	SAC3D1	29901	3398	CGI-N-Shore	FALSE	TRUE	FALSE
cg00510718	chr7	106505961	106505962	PIK3CG	5294	237	CGI-N-Shelf	TRUE	TRUE	FALSE
cg00511167	chr3	134206503	134206504	ANAPC13	25847	-1637	CGI-S-Shore	TRUE	TRUE	FALSE
cg00512404	chr12	15114732	15114733	ARHGDIB	397	-169	Non-CGI	TRUE	FALSE	FALSE
cg00513205	chr5	134872649	134872650	NEUROG1	4762	-1009	CGI-S-Shore	TRUE	FALSE	FALSE
cg00513984	chr12	125039177	125039178	NCOR2	9612	12831	Non-CGI	FALSE	TRUE	FALSE
cg00514575	chr5	180231155	180231156	MGAT1	4245	11384	CGI	TRUE	TRUE	FALSE
cg00516067	chr20	61447530	61447531	COL9A3	1299	-882	CGI-N-Shore	TRUE	FALSE	FALSE
cg00517261	chr12	323801	323802	SLC6A12	6539	-429	Non-CGI	TRUE	FALSE	FALSE
cg00518527	chr19	11268884	11268885	SPC24	147841	-2399	CGI-S-Shelf	FALSE	FALSE	TRUE
cg00520406	chr6	3623902	3623903	PXDC1	221749	128342	Non-CGI	FALSE	FALSE	TRUE
cg00520933	chr10	31607160	31607161	ZEB1	6935	-262	CGI	TRUE	TRUE	FALSE
cg00524561	chr12	125197665	125197666	NCOR2	9612	-145654	CGI	FALSE	FALSE	TRUE
cg00525681	chr13	88329151	88329152	SLITRK5	26050	4280	CGI-S-Shore	TRUE	TRUE	FALSE
cg00525683	chr5	156948581	156948582	ADAM19	8728	54200	Non-CGI	FALSE	TRUE	FALSE
cg00534380	chr2	101766586	101766587	TBC1D8	11138	1258	CGI-N-Shore	TRUE	TRUE	FALSE
cg00535514	chr19	44205563	44205564	IRGC	56269	-14649	CGI-S-Shore	FALSE	FALSE	TRUE
cg00539174	chr20	57583434	57583435	CTSZ	1522	-1124	CGI-S-Shore	TRUE	FALSE	FALSE
cg00547480	chr10	103875961	103875962	LDB1	8861	4247	CGI-S-Shore	TRUE	TRUE	FALSE
cg00551146	chr10	14014579	14014580	PRPF18	8559	385639	Non-CGI	TRUE	TRUE	FALSE
cg00552235	chr7	100943163	100943164	RABL5	64792	21928	CGI	FALSE	FALSE	TRUE
cg00553149	chr7	99775558	99775559	STAG3	10734	19	CGI	TRUE	FALSE	FALSE
cg00554413	chr1	59042113	59042114	TACSTD2	4070	1051	CGI	TRUE	FALSE	FALSE
cg00554631	chr4	155340841	155340842	DCHS2	54798	72087	CGI-S-Shelf	FALSE	TRUE	FALSE
cg00555456	chr7	96745696	96745697	ACN9	57001	-207	CGI-N-Shore	TRUE	FALSE	FALSE
cg00555816	chr13	113584082	113584083	MCF2L	23263	-38695	CGI-N-Shore	FALSE	TRUE	FALSE
cg00556515	chr12	6442607	6442608	TNFRSF1A	7132	8674	CGI-S-Shelf	TRUE	TRUE	FALSE
cg00557959	chr13	113296414	113296415	C13orf35	400165	-4942	CGI	FALSE	FALSE	TRUE
cg00558804	chr16	88769761	88769762	RNF166	115992	3066	CGI	TRUE	TRUE	FALSE
cg00565412	chr21	26933554	26933555	MIR155HG	114614	-901	CGI-N-Shore	TRUE	FALSE	FALSE
cg00576736	chr1	20030383	20030384	HTR6	3362	38602	Non-CGI	FALSE	TRUE	FALSE
cg00578614	chr6	30070403	30070404	TRIM31	11074	10462	CGI-S-Shore	FALSE	FALSE	TRUE
cg00585790	chr2	109204845	109204846	LIMS1	3987	54033	Non-CGI	TRUE	TRUE	FALSE
cg00586420	chr2	177034761	177034762	HOXD3	3232	5955	CGI-N-Shore	FALSE	TRUE	FALSE
cg00589181	chr3	124560306	124560307	ITGB5	3693	45836	Non-CGI	FALSE	TRUE	FALSE
cg00590036	chr6	158957433	158957434	TMEM181	57583	-33	CGI	TRUE	FALSE	FALSE
cg00590063	chr19	17918795	17918796	B3GNT3	10331	12875	CGI	FALSE	TRUE	FALSE
cg00590081	chr13	49549665	49549666	FNDC3A	22862	-381	CGI	TRUE	FALSE	FALSE
cg00590324	chr6	134212732	134212733	TCF21	6943	2472	CGI	FALSE	TRUE	FALSE
cg00590817	chr1	8272081	8272082	SLC45A1	50651	-112307	CGI	FALSE	FALSE	TRUE
cg00593298	chr10	13890043	13890044	PRPF18	8559	261103	Non-CGI	FALSE	TRUE	FALSE
cg00598235	chr4	17580680	17580681	LAP3	51056	1752	CGI-S-Shore	FALSE	TRUE	FALSE
cg00600454	chr1	65468017	65468018	JAK1	3716	-35397	CGI	TRUE	FALSE	FALSE
cg00602295	chr16	81328089	81328090	GAN	8139	-20480	Non-CGI	FALSE	FALSE	TRUE
cg00610577	chr12	12008666	12008667	ETV6	2120	205877	Non-CGI	FALSE	TRUE	FALSE
cg00615592	chr6	158937125	158937126	TMEM181	57583	-20341	CGI	FALSE	FALSE	TRUE
cg00618183	chr17	75143600	75143601	SCARNA16	677781	58210	Non-CGI	FALSE	TRUE	FALSE
cg00619207	chr1	111743368	111743369	DENND2D	79961	3661	CGI-N-Shelf	TRUE	TRUE	FALSE
cg00621289	chr21	47855916	47855917	DIP2A	23181	-22944	CGI	FALSE	TRUE	FALSE
cg00628697	chr21	38630342	38630343	DSCR3	10311	9489	CGI	FALSE	TRUE	FALSE
cg00629427	chr13	95357638	95357639	SOX21	11166	6749	CGI	FALSE	FALSE	TRUE
cg00630991	chr12	12252249	12252250	MIR1244-1	100302285	-12635	Non-CGI	FALSE	TRUE	FALSE
cg00631221	chr6	139307985	139307986	REPS1	85021	1411	CGI-N-Shore	FALSE	TRUE	FALSE
cg00634542	chr2	219254588	219254589	SLC11A1	6556	7835	CGI-S-Shore	FALSE	TRUE	FALSE
cg00637477	chr20	62525797	62525798	DNAJC5	80331	-656	CGI	TRUE	FALSE	FALSE
cg00637802	chr12	113590234	113590235	CCDC42B	387885	2570	CGI-N-Shore	FALSE	TRUE	FALSE
cg00643333	chr22	45705037	45705038	FAM118A	55007	-42	CGI	TRUE	FALSE	FALSE
cg00645579	chr11	617140	617141	IRF7	3665	-1140	CGI	TRUE	TRUE	FALSE
cg00646396	chr1	26482755	26482756	FAM110D	79927	-2754	Non-CGI	FALSE	FALSE	TRUE
cg00648883	chr13	32524761	32524762	FRY	10129	-80674	CGI-N-Shore	TRUE	TRUE	FALSE
cg00650809	chr19	17439339	17439340	ANO8	57719	6297	CGI	FALSE	TRUE	FALSE
cg00658007	chr1	211666129	211666130	RD3	343035	128	Non-CGI	TRUE	FALSE	FALSE
cg00661777	chr7	106511741	106511742	PIK3CG	5294	6017	CGI-S-Shelf	FALSE	TRUE	FALSE
cg00662956	chr3	185829300	185829301	ETV5	2119	-2398	CGI-S-Shore	FALSE	FALSE	TRUE
cg00665114	chr1	175403347	175403348	KIAA0040	9674	-241117	Non-CGI	FALSE	TRUE	FALSE
cg00667789	chr1	59042065	59042066	TACSTD2	4070	1099	CGI	TRUE	FALSE	FALSE
cg00672093	chr2	139654844	139654845	YY1P2	647012	-48	Non-CGI	TRUE	FALSE	FALSE
cg00673344	chr3	156807691	156807692	LOC100498859	100498859	20	CGI-S-Shore	TRUE	TRUE	FALSE
cg00677334	chr16	68765982	68765983	CDH1	999	-5211	Non-CGI	FALSE	FALSE	TRUE
cg00681462	chr14	75800724	75800725	LOC731223	731223	39616	CGI-N-Shore	FALSE	FALSE	TRUE
cg00682734	chr20	55200973	55200974	TFAP2C	7022	-3383	CGI	FALSE	FALSE	TRUE
cg00685319	chr17	6560967	6560968	MIR4520A	100616401	-2138	CGI-S-Shore	FALSE	FALSE	TRUE
cg00687252	chr6	30712060	30712061	IER3	8870	265	CGI	TRUE	TRUE	FALSE
cg00688941	chr8	39898391	39898392	IDO2	169355	105916	Non-CGI	FALSE	FALSE	TRUE
cg00690271	chr12	49658716	49658717	PRPH	5630	-30191	CGI	TRUE	TRUE	FALSE
cg00691240	chr1	52498502	52498503	KTI12	112970	968	CGI	TRUE	TRUE	FALSE
cg00691874	chr17	1521312	1521313	SLC43A2	124935	10816	CGI-N-Shore	FALSE	TRUE	FALSE
cg00694302	chr12	47609865	47609866	PCED1B-AS1	100233209	359	Non-CGI	TRUE	TRUE	FALSE
cg00697916	chr3	65342644	65342645	MIR548A2	693126	636960	CGI	FALSE	TRUE	FALSE
cg00698575	chr9	140388604	140388605	NSMF	26012	-34817	CGI-N-Shore	FALSE	TRUE	FALSE
cg00702638	chr3	44803293	44803294	KIF15	56992	83	CGI	TRUE	FALSE	FALSE
cg00707814	chr12	121893668	121893669	RNF34	80196	55765	CGI	FALSE	TRUE	FALSE
cg00709979	chr16	85866348	85866349	COX4I1	1327	33174	Non-CGI	FALSE	FALSE	TRUE
cg00712841	chr5	37835548	37835549	GDNF	2668	4232	CGI-S-Shore	TRUE	TRUE	FALSE
cg00714531	chr21	46955647	46955648	SLC19A1	6573	8676	CGI	TRUE	TRUE	FALSE
cg00714762	chr17	40021969	40021970	KLHL11	55175	-339	CGI-S-Shore	TRUE	FALSE	FALSE
cg00716277	chr7	157369376	157369377	MIR153-2	406945	-2261	CGI	FALSE	TRUE	FALSE
cg00718470	chr15	98964982	98964983	FAM169B	283777	92627	CGI	FALSE	FALSE	TRUE
cg00719771	chr6	23523214	23523215	NRSN1	140767	-603198	Non-CGI	FALSE	FALSE	TRUE
cg00730441	chr17	59483863	59483864	C17orf82	388407	-5247	CGI-S-Shore	FALSE	TRUE	FALSE
cg00732383	chr18	46482439	46482440	SMAD7	4092	-5357	CGI-S-Shelf	FALSE	FALSE	TRUE
cg00743094	chr13	100547968	100547969	ZIC5	85416	76208	CGI-S-Shore	FALSE	TRUE	FALSE
cg00745389	chr7	32467435	32467436	LOC100130673	100130673	30669	CGI	FALSE	FALSE	TRUE
cg00748589	chr12	11653486	11653487	LOC338817	338817	-47476	CGI	FALSE	FALSE	TRUE
cg00748718	chr3	53283691	53283692	TKT	7086	6437	Non-CGI	FALSE	TRUE	FALSE
cg00750555	chr16	22204290	22204291	EEF2K	29904	-13300	CGI-S-Shore	FALSE	FALSE	TRUE
cg00750880	chr17	75681168	75681169	LOC100507351	100507351	138144	Non-CGI	FALSE	FALSE	TRUE
cg00753676	chr4	38662991	38662992	KLF3	51274	-2797	CGI-N-Shore	FALSE	TRUE	FALSE
cg00754552	chr19	50848461	50848462	NAPSB	256236	-455	Non-CGI	TRUE	TRUE	FALSE
cg00754688	chr2	225307499	225307500	FAM124B	79843	-40787	CGI	FALSE	FALSE	TRUE
cg00757207	chr17	7456223	7456224	TNFSF12-TNFSF13	407977	3847	CGI-S-Shelf	FALSE	TRUE	FALSE
cg00759427	chr20	62708630	62708631	RGS19	10287	2692	CGI-S-Shelf	FALSE	TRUE	FALSE
cg00759807	chr16	89390789	89390790	LOC100287036	100287036	3247	CGI	FALSE	TRUE	FALSE
cg00765128	chr6	28226905	28226906	ZKSCAN4	387032	104	CGI-N-Shore	TRUE	TRUE	FALSE
cg00765737	chr13	110993493	110993494	COL4A2	1284	33861	Non-CGI	FALSE	TRUE	FALSE
cg00769590	chr12	1756074	1756075	MIR3649	100500816	13470	CGI-S-Shore	FALSE	TRUE	FALSE
cg00783712	chr1	239974513	239974514	RPS7P5	645884	-196309	Non-CGI	FALSE	TRUE	FALSE
cg00784671	chr22	46762841	46762842	TRMU	55687	31542	CGI	FALSE	TRUE	FALSE
cg00787180	chr14	91751731	91751732	GPR68	8111	-31506	CGI-N-Shore	TRUE	TRUE	FALSE
cg00787290	chr6	118226103	118226104	SLC35F1	222553	-2584	CGI-N-Shore	FALSE	FALSE	TRUE
cg00788156	chr11	10590557	10590558	LYVE1	10894	-191	Non-CGI	TRUE	TRUE	FALSE
cg00788177	chr6	159360761	159360762	C6orf99	100130967	51141	CGI	FALSE	FALSE	TRUE
cg00790020	chr8	1765477	1765478	MIR596	693181	79	CGI	FALSE	FALSE	TRUE
cg00792271	chr5	62074572	62074573	LRRC70	100130733	200009	Non-CGI	FALSE	FALSE	TRUE
cg00793181	chr12	52995634	52995635	KRT72	140807	-311	CGI-S-Shore	TRUE	FALSE	FALSE
cg00795503	chr14	100523653	100523654	EVL	51466	85501	Non-CGI	FALSE	TRUE	FALSE
cg00804354	chr1	249111407	249111408	SH3BP5L	80851	8745	Non-CGI	FALSE	TRUE	FALSE
cg00807871	chr6	37617124	37617125	MDGA1	266727	48640	CGI	FALSE	TRUE	FALSE
cg00807959	chr1	48176281	48176282	FOXD2	2306	274591	CGI	FALSE	FALSE	TRUE
cg00809164	chr16	56651049	56651050	MT1M	4499	-322	CGI	TRUE	TRUE	FALSE
cg00809267	chr18	55816433	55816434	NEDD4L	23327	104822	Non-CGI	TRUE	TRUE	FALSE
cg00812557	chr4	38073835	38073836	PTTG2	10744	111778	Non-CGI	FALSE	TRUE	FALSE
cg00812761	chr4	53799391	53799392	RASL11B	65997	70895	Non-CGI	FALSE	TRUE	FALSE
cg00812799	chr13	21295612	21295613	IL17D	53342	18129	CGI	FALSE	TRUE	FALSE
cg00824141	chr2	106015518	106015519	FHL2	2274	39710	CGI	TRUE	TRUE	FALSE
cg00828377	chr3	133394743	133394744	TOPBP1	11073	-14005	CGI-S-Shore	FALSE	FALSE	TRUE
cg00828556	chr3	196351986	196351987	LRRC33	375387	-14668	CGI	FALSE	FALSE	TRUE
cg00830285	chr7	149119905	149119906	ZNF777	27153	38146	CGI	FALSE	FALSE	TRUE
cg00835857	chr8	145086659	145086660	SPATC1	375686	76	Non-CGI	TRUE	FALSE	FALSE
cg00836007	chr8	52801982	52801983	PCMTD1	115294	9751	Non-CGI	FALSE	TRUE	FALSE
cg00839873	chr14	94421989	94421990	ASB2	51676	21085	Non-CGI	TRUE	TRUE	FALSE
cg00840310	chr9	74061514	74061515	TRPM3	80036	304	CGI	FALSE	TRUE	FALSE
cg00840332	chr7	127881269	127881270	LEP	3952	-60	CGI	TRUE	FALSE	FALSE
cg00840694	chr8	1994574	1994575	MYOM2	9172	1415	CGI	FALSE	TRUE	FALSE
cg00841968	chr14	69446664	69446665	ACTN1	87	-580	CGI	TRUE	FALSE	FALSE
cg00842095	chr14	70116951	70116952	KIAA0247	9766	38640	Non-CGI	FALSE	TRUE	FALSE
cg00851830	chr14	100201016	100201017	EML1	2009	-3051	Non-CGI	FALSE	FALSE	TRUE
cg00853733	chr12	122244223	122244224	SETD1B	23067	1584	CGI-S-Shore	FALSE	TRUE	FALSE
cg00855479	chr1	12375760	12375761	VPS13D	55187	85646	Non-CGI	FALSE	TRUE	FALSE
cg00858840	chr2	171573839	171573840	SP5	389058	1981	CGI	FALSE	TRUE	FALSE
cg00859330	chr1	4835298	4835299	AJAP1	55966	120192	CGI-S-Shore	FALSE	TRUE	FALSE
cg00859441	chr12	113799660	113799661	PLBD2	196463	3288	CGI-S-Shelf	FALSE	TRUE	FALSE
cg00860370	chr1	104068121	104068122	RNPC3	55599	-455	CGI-N-Shore	TRUE	FALSE	FALSE
cg00861610	chr4	62065095	62065096	LPHN3	23284	-1877	CGI-N-Shore	TRUE	FALSE	FALSE
cg00862290	chr3	178984973	178984974	KCNMB3	27094	-134	CGI-S-Shore	TRUE	FALSE	FALSE
cg00862408	chr11	67177034	67177035	TBC1D10C	374403	5647	CGI	FALSE	TRUE	FALSE
cg00868875	chr18	24127237	24127238	KCTD1	284252	93069	CGI	TRUE	TRUE	FALSE
cg00870269	chr15	58782688	58782689	LIPC	3990	79912	CGI	FALSE	TRUE	FALSE
cg00872532	chr2	189168448	189168449	MIR561	693146	6228	Non-CGI	FALSE	TRUE	FALSE
cg00874032	chr3	5095248	5095249	ARL8B	55207	-68680	Non-CGI	FALSE	FALSE	TRUE
cg00878163	chr17	56565644	56565645	HSF5	124535	113	CGI	TRUE	FALSE	FALSE
cg00878605	chr19	17716645	17716646	COLGALT1	79709	50133	CGI-N-Shore	FALSE	TRUE	FALSE
cg00879824	chr6	44747344	44747345	MIR4642	100616352	343965	Non-CGI	FALSE	FALSE	TRUE
cg00880290	chr19	14550999	14551000	PKN1	5585	6832	CGI-N-Shore	TRUE	TRUE	FALSE
cg00883831	chr2	208636032	208636033	FZD5	7855	-1888	CGI	TRUE	FALSE	FALSE
cg00889363	chr2	206255841	206255842	NRP2	8828	-291381	Non-CGI	FALSE	TRUE	FALSE
cg00890049	chr6	115892863	115892864	TPI1P3	728402	-467029	Non-CGI	FALSE	FALSE	TRUE
cg00892324	chr7	2565575	2565576	MIR4648	100616116	-1131	CGI-S-Shore	TRUE	TRUE	FALSE
cg00896182	chr14	54686589	54686590	CDKN3	1033	-177082	CGI-S-Shore	FALSE	FALSE	TRUE
cg00901675	chr13	30728236	30728237	KATNAL1	84056	153346	CGI	FALSE	FALSE	TRUE
cg00902104	chr10	124901908	124901909	HMX2	3167	-5728	CGI-S-Shore	FALSE	FALSE	TRUE
cg00902153	chr3	188506715	188506716	TPRG1	285386	-158286	Non-CGI	FALSE	TRUE	FALSE
cg00902374	chr3	25461111	25461112	RARB	5915	245287	Non-CGI	FALSE	TRUE	FALSE
cg00903825	chr14	93170970	93170971	LGMN	5641	44075	CGI-S-Shore	FALSE	TRUE	FALSE
cg00904823	chr10	112418708	112418709	RBM20	282996	14552	Non-CGI	FALSE	TRUE	FALSE
cg00911370	chr20	1472098	1472099	SIRPB2	284759	133	Non-CGI	TRUE	FALSE	FALSE
cg00913799	chr10	49953879	49953880	WDFY4	57705	60957	CGI-N-Shore	FALSE	TRUE	FALSE
cg00915372	chr17	75209460	75209461	2009-09-01	10801	-68030	CGI	FALSE	TRUE	FALSE
cg00916635	chr1	114414312	114414313	PTPN22	26191	61	Non-CGI	TRUE	TRUE	FALSE
cg00916899	chr20	35944932	35944933	MANBAL	63905	26880	Non-CGI	FALSE	TRUE	FALSE
cg00927231	chr16	4357579	4357580	GLIS2	84662	-24635	CGI	FALSE	FALSE	TRUE
cg00930833	chr8	41168264	41168265	SFRP1	6422	-1273	CGI-S-Shore	TRUE	FALSE	FALSE
cg00931181	chr2	6910631	6910632	LINC00487	400941	-188	CGI-N-Shelf	TRUE	FALSE	FALSE
cg00932104	chr1	19972707	19972708	NBL1	4681	2983	CGI-S-Shore	FALSE	TRUE	FALSE
cg00933411	chr8	13373090	13373091	DLC1	10395	-660	Non-CGI	TRUE	FALSE	FALSE
cg00945234	chr1	50886411	50886412	DMRTA2	63950	2706	CGI	FALSE	TRUE	FALSE
cg00946187	chr17	1396953	1396954	MYO1C	4641	-951	CGI-S-Shore	TRUE	FALSE	FALSE
cg00950718	chr1	159859904	159859905	CCDC19	25790	10000	Non-CGI	FALSE	TRUE	FALSE
cg00951857	chr6	108435666	108435667	OSTM1	28962	-39724	CGI	FALSE	FALSE	TRUE
cg00951869	chr14	24805349	24805350	ADCY4	196883	-1071	CGI-S-Shore	TRUE	TRUE	FALSE
cg00954633	chr1	7621849	7621850	VAMP3	9341	-209478	CGI-N-Shore	FALSE	TRUE	FALSE
cg00955307	chr1	166889789	166889790	TADA1	117143	-44134	CGI-N-Shore	FALSE	TRUE	FALSE
cg00955413	chr5	114935797	114935798	TICAM2	353376	2377	CGI-N-Shore	FALSE	TRUE	FALSE
cg00955482	chr18	712737	712738	ENOSF1	55556	-74	CGI	TRUE	FALSE	FALSE
cg00957698	chr4	121991345	121991346	NDNF	79625	2326	CGI-N-Shore	FALSE	TRUE	FALSE
cg00960700	chr17	80709150	80709151	TBCD	6904	-788	CGI	TRUE	FALSE	FALSE
cg00961792	chr1	207120407	207120408	PIGR	5284	-595	Non-CGI	TRUE	FALSE	FALSE
cg00962755	chr1	201439001	201439002	PHLDA3	23612	-701	CGI	TRUE	FALSE	FALSE
cg00963169	chr1	50513927	50513928	ELAVL4	1996	240	CGI	FALSE	TRUE	FALSE
cg00965133	chr20	36157577	36157578	BLCAP	10904	-1243	CGI-S-Shore	TRUE	FALSE	FALSE
cg00965578	chr22	36560801	36560802	APOL3	80833	1422	Non-CGI	TRUE	FALSE	FALSE
cg00967073	chr1	244443687	244443688	C1orf100	200159	-72248	Non-CGI	FALSE	FALSE	TRUE
cg00974941	chr7	48075316	48075317	C7orf57	136288	198	CGI	FALSE	TRUE	FALSE
cg00975624	chr3	159646501	159646502	IL12A	3592	-60120	Non-CGI	FALSE	TRUE	FALSE
cg00978848	chr2	235680305	235680306	SH3BP4	23677	-180321	Non-CGI	FALSE	FALSE	TRUE
cg00982400	chr5	149438095	149438096	CSF1R	1436	54838	Non-CGI	FALSE	TRUE	FALSE
cg00983637	chr1	26663115	26663116	AIM1L	55057	17504	CGI	FALSE	TRUE	FALSE
cg00983697	chr1	217314284	217314285	ESRRG	2104	-3186	CGI-S-Shore	FALSE	FALSE	TRUE
cg00983948	chr6	158937485	158937486	TMEM181	57583	-19981	CGI	FALSE	FALSE	TRUE
cg00984696	chr3	124128381	124128382	UMPS	7372	-320830	Non-CGI	FALSE	TRUE	FALSE
cg00985115	chr12	48592818	48592819	OR10AD1	121275	4255	CGI-S-Shore	FALSE	FALSE	TRUE
cg00988350	chr1	24126048	24126049	GALE	2582	1244	CGI-N-Shore	TRUE	TRUE	FALSE
cg00989036	chr1	47060074	47060075	MOB3C	148932	22487	Non-CGI	FALSE	TRUE	FALSE
cg00989986	chr8	49746558	49746559	SNAI2	6591	87439	CGI-N-Shore	FALSE	FALSE	TRUE
cg00990740	chr21	39871287	39871288	ERG	2078	162415	Non-CGI	TRUE	TRUE	FALSE
cg00991848	chr16	2014270	2014271	RPS2	6187	555	CGI	TRUE	TRUE	FALSE
cg00995854	chr1	157802305	157802306	CD5L	922	9327	Non-CGI	FALSE	TRUE	FALSE
cg00999152	chr2	72369887	72369888	CYP26B1	56603	5074	CGI-N-Shore	FALSE	TRUE	FALSE
cg01003448	chr16	745685	745686	WDR24	84219	-5284	CGI	TRUE	TRUE	FALSE
cg01003961	chr7	20824706	20824707	SP8	221833	1800	CGI	TRUE	TRUE	FALSE
cg01004017	chr2	121657347	121657348	GLI2	2736	164147	Non-CGI	FALSE	TRUE	FALSE
cg01005180	chr7	151384763	151384764	RHEB	6009	-167752	Non-CGI	FALSE	TRUE	FALSE
cg01007305	chr10	88123687	88123688	GRID1	2894	2561	CGI	FALSE	TRUE	FALSE
cg01011367	chr10	124798692	124798693	ACADSB	36	30262	Non-CGI	FALSE	TRUE	FALSE
cg01015401	chr4	129630613	129630614	PHF17	79960	-100164	Non-CGI	FALSE	FALSE	TRUE
cg01019770	chr17	1929555	1929556	RTN4RL1	146760	-1376	CGI-S-Shore	TRUE	FALSE	FALSE
cg01020368	chr2	205070149	205070150	ICOS	29851	268677	Non-CGI	FALSE	FALSE	TRUE
cg01026009	chr7	155294404	155294405	CNPY1	285888	32133	Non-CGI	FALSE	TRUE	FALSE
cg01026383	chr6	32905012	32905013	HLA-DMB	3109	3833	Non-CGI	TRUE	TRUE	FALSE
cg01029450	chr22	43253559	43253560	ARFGAP3	26286	-150	CGI	TRUE	FALSE	FALSE
cg01031101	chr6	28227091	28227092	NKAPL	222698	-5	CGI	TRUE	FALSE	FALSE
cg01032650	chr20	3654766	3654767	ADAM33	80332	7970	CGI	TRUE	TRUE	FALSE
cg01032675	chr19	3136430	3136431	GNA15	2769	238	CGI	TRUE	FALSE	FALSE
cg01035035	chr8	104164992	104164993	MIR3151	100422992	-1848	Non-CGI	TRUE	TRUE	FALSE
cg01036090	chr12	53104746	53104747	KRT77	374454	-7498	CGI-N-Shelf	FALSE	FALSE	TRUE
cg01037082	chr22	28008538	28008539	MN1	4330	188946	CGI-N-Shore	FALSE	FALSE	TRUE
cg01040259	chr17	73314451	73314452	SLC25A19	60386	-28920	CGI-N-Shelf	FALSE	TRUE	FALSE
cg01043616	chr12	50475035	50475036	SMARCD1	6602	-3946	CGI	FALSE	TRUE	FALSE
cg01044293	chr2	173296469	173296470	ITGA6	3655	4386	CGI-S-Shelf	FALSE	TRUE	FALSE
cg01045337	chr16	374988	374989	LUC7L	55692	10576	CGI	FALSE	TRUE	FALSE
cg01047904	chr12	20521183	20521184	PDE3A	5139	-994	CGI	TRUE	FALSE	FALSE
cg01049678	chr7	150147536	150147537	GIMAP8	155038	-424	CGI-S-Shore	TRUE	FALSE	FALSE
cg01051524	chr2	106415145	106415146	NCK2	8440	53624	Non-CGI	FALSE	TRUE	FALSE
cg01054622	chr1	21044691	21044692	KIF17	57576	-373	CGI	TRUE	FALSE	FALSE
cg01057945	chr12	50303785	50303786	LOC283332	283332	1859	Non-CGI	TRUE	TRUE	FALSE
cg01059100	chr16	31214607	31214608	PYCARD	29108	-509	CGI-S-Shore	TRUE	FALSE	FALSE
cg01062113	chr11	93865443	93865444	PANX1	24145	3348	CGI-S-Shelf	FALSE	TRUE	FALSE
cg01062937	chr16	88537260	88537261	ZFPM1	161882	17245	CGI	FALSE	TRUE	FALSE
cg01063280	chr6	108167599	108167600	SCML4	256380	-22077	CGI-N-Shore	FALSE	FALSE	TRUE
cg01064979	chr22	37309487	37309488	CSF2RB	1439	-186	Non-CGI	TRUE	FALSE	FALSE
cg01065599	chr21	38075171	38075172	SIM2	6493	3179	CGI-S-Shore	FALSE	TRUE	FALSE
cg01067216	chr14	102051021	102051022	DIO3	1735	23332	CGI	FALSE	FALSE	TRUE
cg01073837	chr8	38757859	38757860	PLEKHA2	59339	-892	CGI	TRUE	FALSE	FALSE
cg01076704	chr20	31127744	31127745	C20orf112	140688	-3543	CGI-S-Shelf	FALSE	FALSE	TRUE
cg01077100	chr10	124067280	124067281	BTBD16	118663	36458	Non-CGI	FALSE	TRUE	FALSE
cg01079164	chr1	156595461	156595462	HAPLN2	60484	6374	CGI	FALSE	TRUE	FALSE
cg01079738	chr1	182922427	182922428	SHCBP1L	81626	124	CGI	TRUE	FALSE	FALSE
cg01082907	chr6	168709067	168709068	DACT2	168002	11333	CGI-S-Shore	FALSE	TRUE	FALSE
cg01083040	chr15	73973808	73973809	CD276	80381	-2812	CGI-N-Shelf	FALSE	FALSE	TRUE
cg01084239	chr11	8102510	8102511	TUB	7275	61718	CGI	TRUE	TRUE	FALSE
cg01087254	chr15	57052190	57052191	TCF12	6938	-158131	Non-CGI	FALSE	TRUE	FALSE
cg01088382	chr10	23464290	23464291	PTF1A	256297	-17168	CGI-S-Shore	FALSE	FALSE	TRUE
cg01089001	chr11	11610742	11610743	GALNT18	374378	32817	Non-CGI	FALSE	TRUE	FALSE
cg01089425	chr5	10655518	10655519	ANKRD33B	651746	91082	CGI-N-Shore	FALSE	TRUE	FALSE
cg01089579	chr7	155914371	155914372	SHH	6469	-309403	CGI-N-Shore	FALSE	FALSE	TRUE
cg01089914	chr2	218843229	218843230	TNS1	7145	24487	CGI-N-Shore	FALSE	TRUE	FALSE
cg01091117	chr5	40682333	40682334	PTGER4	5734	2300	CGI-S-Shore	FALSE	TRUE	FALSE
cg01093696	chr5	92936528	92936529	NR2F1	7025	17484	CGI-S-Shore	FALSE	FALSE	TRUE
cg01096199	chr14	90191045	90191046	FOXN3	1112	-105550	Non-CGI	FALSE	FALSE	TRUE
cg01103207	chr7	47535640	47535641	TNS3	64759	86100	Non-CGI	FALSE	TRUE	FALSE
cg01108370	chr7	151330008	151330009	RHEB	6009	-112997	CGI	TRUE	TRUE	FALSE
cg01108392	chr20	62151062	62151063	PPDPF	79144	-1069	CGI	TRUE	FALSE	FALSE
cg01117339	chr11	73737124	73737125	UCP3	7352	-16841	Non-CGI	FALSE	TRUE	FALSE
cg01117384	chr20	56274096	56274097	PMEPA1	56937	12443	Non-CGI	FALSE	TRUE	FALSE
cg01117705	chr17	1629224	1629225	WDR81	124997	9406	CGI	TRUE	TRUE	FALSE
cg01119072	chr16	84076582	84076583	SLC38A8	146167	-819	CGI-S-Shore	TRUE	FALSE	FALSE
cg01122302	chr17	42392668	42392669	RUNDC3A	10900	6740	CGI	FALSE	TRUE	FALSE
cg01122755	chr6	44281249	44281250	AARS2	57505	-185	CGI-S-Shore	TRUE	TRUE	FALSE
cg01125010	chr17	76134099	76134100	TMC6	11322	-5610	CGI-S-Shelf	TRUE	TRUE	FALSE
cg01126560	chr9	139886304	139886305	C9orf142	286257	-564	CGI-N-Shore	TRUE	FALSE	FALSE
cg01128574	chr7	2058865	2058866	MIR4655	100616160	-174975	CGI-S-Shore	FALSE	TRUE	FALSE
cg01132064	chr11	46382562	46382563	MIR4688	100616368	-15388	Non-CGI	TRUE	TRUE	FALSE
cg01134967	chr10	81370414	81370415	SFTPA1	653509	-279	Non-CGI	TRUE	FALSE	FALSE
cg01135648	chr4	41983611	41983612	DCAF4L1	285429	-100	CGI-N-Shore	TRUE	FALSE	FALSE
cg01136458	chr8	4853275	4853276	CSMD1	64478	-946	CGI-S-Shore	TRUE	FALSE	FALSE
cg01137401	chr3	147107349	147107350	ZIC4	84107	17245	CGI-S-Shore	FALSE	TRUE	FALSE
cg01138020	chr17	4337094	4337095	SPNS3	201305	-123	Non-CGI	TRUE	FALSE	FALSE
cg01141438	chr3	189836207	189836208	LEPREL1	55214	4017	CGI-N-Shore	FALSE	TRUE	FALSE
cg01141812	chr6	123317124	123317125	CLVS2	134829	-456	CGI	TRUE	FALSE	FALSE
cg01142676	chr11	117695591	117695592	FXYD2	486	3214	Non-CGI	TRUE	TRUE	FALSE
cg01144086	chr16	50715260	50715261	SNX20	124460	2	Non-CGI	TRUE	FALSE	FALSE
cg01144436	chr11	17743946	17743947	MYOD1	4654	2835	CGI-S-Shore	FALSE	FALSE	TRUE
cg01147055	chr13	114838162	114838163	RASA3	22821	59931	CGI	FALSE	TRUE	FALSE
cg01149192	chr5	180231058	180231059	MGAT1	4245	11481	CGI	TRUE	TRUE	FALSE
cg01150105	chr3	175139160	175139161	MIR4789	100616395	51830	Non-CGI	FALSE	TRUE	FALSE
cg01153166	chr15	96874702	96874703	MIR1469	100302258	-1786	CGI	TRUE	TRUE	FALSE
cg01154445	chr2	206548171	206548172	NRP2	8828	946	CGI-S-Shore	FALSE	TRUE	FALSE
cg01156249	chr16	4714794	4714795	NUDT16L1	84309	-28898	CGI-S-Shore	FALSE	TRUE	FALSE
cg01160692	chr17	1959620	1959621	HIC1	3090	2171	CGI-S-Shore	TRUE	TRUE	FALSE
cg01162093	chr10	134281626	134281627	C10orf91	170393	22911	CGI-S-Shelf	FALSE	FALSE	TRUE
cg01166071	chr10	8095687	8095688	GATA3-AS1	399717	-239	CGI	TRUE	FALSE	FALSE
cg01166925	chr4	41880280	41880281	TMEM33	55161	-56855	CGI	FALSE	FALSE	TRUE
cg01167274	chr21	46334214	46334215	ITGB2-AS1	100505746	-6734	Non-CGI	FALSE	TRUE	FALSE
cg01167556	chr12	56323639	56323640	DGKA	1606	-1305	CGI-S-Shore	TRUE	FALSE	FALSE
cg01171670	chr11	71083308	71083309	FLJ42102	399923	51090	Non-CGI	FALSE	FALSE	TRUE
cg01172682	chr3	65342216	65342217	MIR548A2	693126	636532	CGI	FALSE	TRUE	FALSE
cg01174743	chr6	157932074	157932075	MIR3692	100500899	-18088	CGI-S-Shore	FALSE	TRUE	FALSE
cg01175767	chr1	112283245	112283246	LOC100506343	100506343	781	CGI-S-Shore	TRUE	TRUE	FALSE
cg01178624	chr11	65360327	65360328	KCNK7	10089	3138	CGI	FALSE	TRUE	FALSE
cg01183510	chr12	66582582	66582583	IRAK3	11213	-394	CGI-N-Shore	TRUE	FALSE	FALSE
cg01185754	chr1	95006729	95006730	F3	2152	682	CGI	TRUE	TRUE	FALSE
cg01195676	chr14	88630058	88630059	GPR65	8477	158589	Non-CGI	TRUE	FALSE	FALSE
cg01196788	chr2	19561709	19561710	OSR1	130497	-3336	CGI	FALSE	FALSE	TRUE
cg01200965	chr2	75065513	75065514	HK2	3099	5730	CGI-S-Shelf	FALSE	TRUE	FALSE
cg01204911	chr5	142187317	142187318	ARHGAP26	23092	37024	Non-CGI	FALSE	TRUE	FALSE
cg01205324	chr19	10138615	10138616	C3P1	388503	-13415	CGI-S-Shore	FALSE	FALSE	TRUE
cg01208224	chr4	6383645	6383646	WFS1	7466	112067	CGI-S-Shelf	TRUE	TRUE	FALSE
cg01209296	chr20	62435316	62435317	ZBTB46	140685	27279	CGI-S-Shore	FALSE	TRUE	FALSE
cg01209642	chr6	170581355	170581356	LOC154449	154449	-9697	CGI	FALSE	FALSE	TRUE
cg01211396	chr6	30624478	30624479	C6orf136	221545	9661	Non-CGI	FALSE	TRUE	FALSE
cg01214587	chr12	121891131	121891132	RNF34	80196	53228	CGI	FALSE	TRUE	FALSE
cg01216418	chr6	132383910	132383911	LOC100507254	100507254	-71206	Non-CGI	FALSE	FALSE	TRUE
cg01219347	chr2	136844289	136844290	CXCR4	7852	31434	CGI-N-Shore	FALSE	FALSE	TRUE
cg01219924	chr17	79004947	79004948	BAIAP2-AS1	440465	3570	CGI	FALSE	TRUE	FALSE
cg01224715	chr5	140811520	140811521	PCDHGA12	26025	1361	CGI-S-Shore	TRUE	TRUE	FALSE
cg01232969	chr18	64933074	64933075	LOC643542	643542	-250707	Non-CGI	FALSE	FALSE	TRUE
cg01234678	chr10	44341979	44341980	LINC00619	414260	1224	Non-CGI	FALSE	TRUE	FALSE
cg01236063	chr11	16632088	16632089	C11orf58	10944	-128058	CGI	FALSE	TRUE	FALSE
cg01238669	chr7	21797276	21797277	CDCA7L	55536	188264	Non-CGI	FALSE	TRUE	FALSE
cg01239112	chr7	77669957	77669958	PHTF2	57157	241847	CGI	FALSE	TRUE	FALSE
cg01242196	chr6	33990181	33990182	MIR1275	100302123	-22352	CGI-S-Shore	FALSE	TRUE	FALSE
cg01244043	chr20	1448437	1448438	NSFL1C	55968	-99	CGI-S-Shore	TRUE	FALSE	FALSE
cg01246622	chr10	115141827	115141828	HABP2	3026	-168761	Non-CGI	FALSE	FALSE	TRUE
cg01257799	chr11	118753476	118753477	CXCR5	643	-997	Non-CGI	TRUE	FALSE	FALSE
cg01259029	chr5	10564690	10564691	ANKRD33B	651746	254	CGI	TRUE	FALSE	FALSE
cg01266375	chr4	129643491	129643492	PHF17	79960	-87286	Non-CGI	FALSE	FALSE	TRUE
cg01267270	chr5	125935359	125935360	PHAX	51808	-1246	CGI-N-Shore	TRUE	FALSE	FALSE
cg01273232	chr15	93652756	93652757	RGMA	56963	-20312	CGI	FALSE	FALSE	TRUE
cg01274907	chr5	140568075	140568076	PCDHB10	56126	-3875	CGI-N-Shore	FALSE	TRUE	FALSE
cg01276323	chr1	41282145	41282146	KCNQ4	9132	32460	CGI-N-Shore	FALSE	TRUE	FALSE
cg01278041	chr4	184018527	184018528	WWC2-AS2	152641	1823	CGI	TRUE	FALSE	FALSE
cg01280390	chr8	19363452	19363453	SH2D4A	63898	192370	Non-CGI	TRUE	TRUE	FALSE
cg01283289	chr12	81472177	81472178	ACSS3	79611	367	CGI-S-Shore	TRUE	FALSE	FALSE
cg01283834	chr4	141488964	141488965	UCP1	7350	993	CGI-N-Shore	FALSE	TRUE	FALSE
cg01285783	chr6	2623778	2623779	C6orf195	154386	11518	Non-CGI	TRUE	TRUE	FALSE
cg01285926	chr7	56242554	56242555	NUPR1L	389493	-58463	CGI	FALSE	FALSE	TRUE
cg01286655	chr11	12031099	12031100	DKK3	27122	215	CGI-S-Shore	TRUE	TRUE	FALSE
cg01287975	chr7	97361241	97361242	TAC1	6863	-28	CGI	TRUE	FALSE	FALSE
cg01288598	chr6	14118227	14118228	CD83	9308	739	CGI	TRUE	TRUE	FALSE
cg01290568	chr2	113593859	113593860	IL1B	3553	495	Non-CGI	TRUE	TRUE	FALSE
cg01291010	chr16	68297173	68297174	SLC7A6	9057	-1244	CGI-N-Shore	TRUE	FALSE	FALSE
cg01291381	chr22	40811960	40811961	SGSM3	27352	45364	CGI-N-Shelf	FALSE	TRUE	FALSE
cg01298678	chr9	126772537	126772538	LHX2	9355	-1350	CGI-S-Shore	TRUE	FALSE	FALSE
cg01298731	chr4	154711457	154711458	SFRP2	6423	-1228	CGI	TRUE	FALSE	FALSE
cg01301803	chr10	134143535	134143536	LRRC27	80313	-2077	CGI	FALSE	TRUE	FALSE
cg01302656	chr14	29254853	29254854	C14orf23	387978	12942	CGI	TRUE	TRUE	FALSE
cg01303236	chr5	73934842	73934843	HEXB	3074	-1004	CGI-N-Shore	TRUE	TRUE	FALSE
cg01305745	chr16	31106788	31106789	PRSS53	339105	-511	CGI-S-Shore	TRUE	FALSE	FALSE
cg01306824	chr17	77834118	77834119	CBX4	8535	-20904	CGI-N-Shore	FALSE	FALSE	TRUE
cg01307108	chr6	43208931	43208932	TTBK1	84630	-2289	CGI-N-Shelf	FALSE	FALSE	TRUE
cg01308968	chr4	58061859	58061860	IGFBP7	3490	-85307	CGI	FALSE	TRUE	FALSE
cg01310019	chr6	27840166	27840167	HIST1H3I	8354	-66	CGI	TRUE	FALSE	FALSE
cg01311181	chr22	44577181	44577182	PARVG	64098	8344	CGI-N-Shore	TRUE	TRUE	FALSE
cg01311995	chr16	85205741	85205742	LOC400548	400548	34984	CGI-S-Shore	FALSE	FALSE	TRUE
cg01314252	chr3	9943828	9943829	IL17RE	132014	-466	Non-CGI	TRUE	TRUE	FALSE
cg01319701	chr20	749264	749265	SLC52A3	113278	-35	Non-CGI	TRUE	FALSE	FALSE
cg01320130	chr1	67600311	67600312	C1orf141	400757	340	CGI-S-Shore	FALSE	TRUE	FALSE
cg01320298	chr3	15160158	15160159	ZFYVE20	64145	-19502	CGI	FALSE	FALSE	TRUE
cg01323457	chr15	20564627	20564628	CHEK2P2	646096	76629	CGI-S-Shore	FALSE	FALSE	TRUE
cg01324474	chr12	54758545	54758546	GPR84	53831	-274	Non-CGI	TRUE	FALSE	FALSE
cg01327147	chr9	34371380	34371381	KIAA1161	57462	5512	CGI	FALSE	TRUE	FALSE
cg01329687	chr16	11761803	11761804	SNN	8303	-484	CGI	TRUE	FALSE	FALSE
cg01330096	chr13	112713372	112713373	SOX1	6656	-8539	CGI-S-Shore	FALSE	FALSE	TRUE
cg01331772	chr2	131094827	131094828	CCDC115	84317	5093	CGI	TRUE	FALSE	FALSE
cg01332882	chr20	47874155	47874156	ZFAS1	441951	-20558	Non-CGI	FALSE	TRUE	FALSE
cg01334831	chr13	114832833	114832834	RASA3	22821	65260	CGI-N-Shore	FALSE	TRUE	FALSE
cg01335597	chr19	1944192	1944193	CSNK1G2	1455	3030	CGI	FALSE	TRUE	FALSE
cg01336231	chr3	16523047	16523048	RFTN1	23180	32173	Non-CGI	FALSE	TRUE	FALSE
cg01342115	chr3	134031663	134031664	RYK	6259	-62076	CGI	FALSE	FALSE	TRUE
cg01342226	chr4	141034510	141034511	MAML3	55534	40721	Non-CGI	FALSE	TRUE	FALSE
cg01342981	chr2	127415063	127415064	GYPC	2995	1378	CGI-S-Shore	FALSE	TRUE	FALSE
cg01343041	chr2	24397787	24397788	FAM228A	653140	255	CGI	TRUE	TRUE	FALSE
cg01348584	chr7	4911022	4911023	PAPOLB	56903	-9396	CGI-N-Shore	FALSE	TRUE	FALSE
cg01348733	chr17	33700757	33700758	SLFN11	91607	-36	CGI	TRUE	FALSE	FALSE
cg01348922	chr17	77707012	77707013	ENPP7	339221	2129	CGI	FALSE	TRUE	FALSE
cg01357222	chr6	137619143	137619144	IFNGR1	3459	-78575	Non-CGI	FALSE	FALSE	TRUE
cg01360795	chr3	138839804	138839805	BPESC1	60467	16776	Non-CGI	FALSE	TRUE	FALSE
cg01364935	chr16	73185687	73185688	HTA	283902	59438	Non-CGI	FALSE	FALSE	TRUE
cg01370449	chr7	27183369	27183370	HOXA5	3202	-81	CGI	TRUE	TRUE	FALSE
cg01370805	chr22	51111217	51111218	SHANK3	85358	-1851	CGI-N-Shore	TRUE	FALSE	FALSE
cg01381934	chr3	52529064	52529065	STAB1	23166	-290	Non-CGI	TRUE	FALSE	FALSE
cg01382502	chr16	22252504	22252505	EEF2K	29904	34911	Non-CGI	FALSE	TRUE	FALSE
cg01390419	chr10	76803856	76803857	DUPD1	338599	14414	CGI	FALSE	TRUE	FALSE
cg01393985	chr6	89927651	89927652	GABRR1	2569	-154	Non-CGI	TRUE	FALSE	FALSE
cg01394385	chr3	39307922	39307923	CX3CR1	1524	15302	Non-CGI	TRUE	TRUE	FALSE
cg01395127	chr6	1601229	1601230	FOXC1	2296	-9450	CGI	FALSE	FALSE	TRUE
cg01401534	chr6	4079342	4079343	C6orf201	404220	-96	CGI	TRUE	TRUE	FALSE
cg01403010	chr22	38609534	38609535	MAFF	23764	11594	CGI-N-Shore	TRUE	TRUE	FALSE
cg01404873	chr13	50701050	50701051	DLEU2	8847	-1372	CGI	TRUE	TRUE	FALSE
cg01405985	chr19	36345675	36345676	KIRREL2	84063	-2133	CGI-N-Shore	FALSE	FALSE	TRUE
cg01409887	chr7	98972188	98972189	ARPC1B	10095	-108	CGI	TRUE	TRUE	FALSE
cg01411921	chr7	25893858	25893859	MIR148A	406940	95746	CGI-S-Shore	FALSE	FALSE	TRUE
cg01413522	chr16	86519105	86519106	FENDRR	400550	23359	Non-CGI	FALSE	TRUE	FALSE
cg01413582	chr6	30652688	30652689	PPP1R18	170954	2982	CGI-N-Shore	TRUE	TRUE	FALSE
cg01413632	chr12	76078445	76078446	KRR1	11103	-173026	Non-CGI	FALSE	FALSE	TRUE
cg01414407	chr1	15495100	15495101	TMEM51	55092	16071	Non-CGI	FALSE	TRUE	FALSE
cg01418351	chr4	1294432	1294433	MAEA	10296	10759	CGI	FALSE	TRUE	FALSE
cg01420987	chr16	21312694	21312695	CRYM-AS1	400508	523	CGI	FALSE	TRUE	FALSE
cg01423916	chr11	47885166	47885167	NUP160	23279	-15108	Non-CGI	FALSE	FALSE	TRUE
cg01425731	chr13	50202658	50202659	ARL11	115761	222	Non-CGI	TRUE	FALSE	FALSE
cg01428378	chr12	123259789	123259790	CCDC62	84660	732	CGI-S-Shore	TRUE	TRUE	FALSE
cg01429859	chr1	16163775	16163776	SPEN	23013	-10582	CGI	FALSE	TRUE	FALSE
cg01429933	chr1	6556248	6556249	PLEKHG5	57449	23819	CGI-N-Shore	FALSE	TRUE	FALSE
cg01432055	chr3	124873848	124873849	HEG1	57493	-99045	CGI	FALSE	TRUE	FALSE
cg01432692	chr1	232674637	232674638	SIPA1L2	57568	-23393	Non-CGI	FALSE	FALSE	TRUE
cg01433468	chr1	211779638	211779639	SLC30A1	7779	-27538	Non-CGI	FALSE	FALSE	TRUE
cg01437515	chr1	1148315	1148316	TNFRSF4	7293	1231	CGI-N-Shore	FALSE	TRUE	FALSE
cg01439408	chr7	75443075	75443076	CCL24	6369	15	Non-CGI	TRUE	FALSE	FALSE
cg01440934	chr1	47051752	47051753	MOB3C	148932	30809	Non-CGI	FALSE	TRUE	FALSE
cg01442620	chr19	33162885	33162886	ANKRD27	84079	3215	CGI-N-Shelf	FALSE	TRUE	FALSE
cg01444643	chr1	55504848	55504849	PCSK9	255738	-299	CGI-N-Shore	TRUE	FALSE	FALSE
cg01446692	chr9	14723496	14723497	CER1	9350	-780	Non-CGI	TRUE	FALSE	FALSE
cg01446950	chr2	222435351	222435352	EPHA4	2043	1657	CGI	TRUE	TRUE	FALSE
cg01447475	chr2	30510887	30510888	LBH	81606	56489	Non-CGI	FALSE	FALSE	TRUE
cg01448155	chr10	3564782	3564783	KLF6	1316	262689	Non-CGI	FALSE	TRUE	FALSE
cg01448863	chr14	70264043	70264044	SLC10A1	6554	-36	Non-CGI	TRUE	FALSE	FALSE
cg01449341	chr19	55044295	55044296	KIR3DX1	90011	385	Non-CGI	FALSE	TRUE	FALSE
cg01449674	chr10	31531682	31531683	ZEB1	6935	-75740	Non-CGI	FALSE	FALSE	TRUE
cg01449715	chr13	51491406	51491407	RNASEH2B	79621	7591	Non-CGI	FALSE	TRUE	FALSE
cg01451193	chr8	104383971	104383972	CTHRC1	115908	184	CGI	TRUE	FALSE	FALSE
cg01454215	chr2	27530363	27530364	UCN	7349	765	CGI	FALSE	TRUE	FALSE
cg01454752	chr8	9758847	9758848	LINC00599	157627	1990	CGI-S-Shore	TRUE	FALSE	FALSE
cg01456571	chr8	23021325	23021326	TNFRSF10D	8793	213	CGI	TRUE	FALSE	FALSE
cg01456691	chr6	11382556	11382557	NEDD9	4739	23	Non-CGI	TRUE	FALSE	FALSE
cg01460991	chr4	25031445	25031446	LGI2	55203	967	CGI-N-Shore	FALSE	TRUE	FALSE
cg01464515	chr10	72254323	72254324	PALD1	27143	15758	Non-CGI	FALSE	TRUE	FALSE
cg01465769	chr3	53226412	53226413	PRKCD	5580	31188	CGI-N-Shelf	FALSE	TRUE	FALSE
cg01467417	chr2	113874068	113874069	IL1RN	3557	17130	Non-CGI	TRUE	TRUE	FALSE
cg01471088	chr12	3700193	3700194	EFCAB4B	84766	162171	CGI-N-Shelf	TRUE	TRUE	FALSE
cg01471153	chr15	34876295	34876296	GOLGA8B	440270	-48072	CGI	FALSE	FALSE	TRUE
cg01473942	chr4	41218683	41218684	APBB2	323	-2047	CGI	FALSE	FALSE	TRUE
cg01479396	chr17	7529693	7529694	SAT2	112483	1499	CGI-N-Shore	TRUE	TRUE	FALSE
cg01487910	chr6	35453938	35453939	TEAD3	7005	10921	CGI	FALSE	TRUE	FALSE
cg01490807	chr17	76666085	76666086	DNAH17	8632	-92608	CGI	FALSE	FALSE	TRUE
cg01496136	chr16	57375219	57375220	CCL22	6367	-17474	Non-CGI	FALSE	FALSE	TRUE
cg01505878	chr11	61690927	61690928	RAB3IL1	5866	-3185	Non-CGI	FALSE	FALSE	TRUE
cg01508380	chr14	23305585	23305586	MMP14	4323	-206	CGI-N-Shore	TRUE	FALSE	FALSE
cg01511232	chr4	155661929	155661930	LRAT	9227	-3221	CGI	FALSE	TRUE	FALSE
cg01511480	chr12	6471251	6471252	LTBR	4055	-13342	CGI-N-Shore	TRUE	TRUE	FALSE
cg01513516	chr2	135473735	135473736	TMEM163	81615	51597	CGI-N-Shore	FALSE	TRUE	FALSE
cg01514538	chr1	2980380	2980381	FLJ42875	440556	-29	CGI	TRUE	FALSE	FALSE
cg01515136	chr1	1229589	1229590	SCNN1D	6339	13772	CGI	FALSE	TRUE	FALSE
cg01515508	chr1	10728270	10728271	CASZ1	54897	128435	CGI-S-Shore	FALSE	TRUE	FALSE
cg01515515	chr1	92414295	92414296	BRDT	676	-631	CGI-N-Shore	TRUE	FALSE	FALSE
cg01516792	chr17	78779140	78779141	CHMP6	79643	-186499	CGI-S-Shore	FALSE	TRUE	FALSE
cg01516851	chr6	28945338	28945339	ZNF311	282890	27753	CGI	FALSE	FALSE	TRUE
cg01517740	chr8	65291990	65291991	MIR124-2	406908	283	CGI	FALSE	TRUE	FALSE
cg01519063	chr8	102505293	102505294	GRHL2	79977	624	CGI-S-Shore	FALSE	TRUE	FALSE
cg01519261	chr21	36421467	36421468	RUNX1-IT1	80215	-9743	Non-CGI	TRUE	TRUE	FALSE
cg01519464	chr1	24861818	24861819	NCMAP	400746	-20747	CGI	FALSE	TRUE	FALSE
cg01527562	chr8	8966732	8966733	PPP1R3B	79660	42418	Non-CGI	FALSE	FALSE	TRUE
cg01529637	chr20	50721911	50721912	ZFP64	55734	86611	CGI	TRUE	TRUE	FALSE
cg01530032	chr17	19435805	19435806	SLC47A1	55244	-1360	CGI-N-Shore	TRUE	FALSE	FALSE
cg01534572	chr16	89024557	89024558	CBFA2T3	863	18945	CGI	FALSE	TRUE	FALSE
cg01538605	chr6	169285957	169285958	THBS2	7058	368178	CGI-S-Shore	FALSE	FALSE	TRUE
cg01539483	chr4	147164948	147164949	LSM6	11157	68112	CGI	FALSE	FALSE	TRUE
cg01539854	chr7	150655109	150655110	KCNH2	3757	20291	CGI-N-Shore	FALSE	TRUE	FALSE
cg01542384	chr3	50284305	50284306	GNAI2	2771	20580	Non-CGI	TRUE	TRUE	FALSE
cg01543603	chr16	89469541	89469542	LOC100287036	100287036	81999	CGI-S-Shore	FALSE	TRUE	FALSE
cg01545223	chr19	22801034	22801035	ZNF492	57615	-16090	CGI	FALSE	TRUE	FALSE
cg01550397	chr1	7408018	7408019	VAMP3	9341	-423309	CGI-N-Shore	FALSE	TRUE	FALSE
cg01551133	chr1	10875522	10875523	CASZ1	54897	-18814	Non-CGI	FALSE	FALSE	TRUE
cg01552197	chr1	88368887	88368888	LOC100505768	100505768	-531548	Non-CGI	FALSE	FALSE	TRUE
cg01555705	chr16	57418351	57418352	CX3CL1	6376	11936	CGI-S-Shelf	FALSE	TRUE	FALSE
cg01556466	chr7	31146260	31146261	ADCYAP1R1	117	54183	Non-CGI	FALSE	TRUE	FALSE
cg01557738	chr22	49812057	49812058	C22orf34	348645	239131	CGI	FALSE	TRUE	FALSE
cg01560972	chr11	8190837	8190838	RIC3	79608	-246	CGI	TRUE	FALSE	FALSE
cg01561719	chr10	90611855	90611856	ANKRD22	118932	-122	Non-CGI	TRUE	FALSE	FALSE
cg01567051	chr16	81512025	81512026	CMIP	80790	33249	Non-CGI	FALSE	TRUE	FALSE
cg01567509	chr1	15104223	15104224	KAZN	23254	179009	Non-CGI	FALSE	TRUE	FALSE
cg01572653	chr9	98790132	98790133	LINC00092	100188953	-6094	CGI	FALSE	TRUE	FALSE
cg01572940	chr2	45398381	45398382	UNQ6975	400952	83697	CGI-S-Shore	FALSE	FALSE	TRUE
cg01573562	chr12	113229319	113229320	OAS1	4938	-115418	CGI-N-Shore	TRUE	TRUE	FALSE
cg01574513	chr16	85981720	85981721	IRF8	3394	48945	CGI	FALSE	FALSE	TRUE
cg01574571	chr19	18197710	18197711	MAST3	23031	-10891	Non-CGI	TRUE	TRUE	FALSE
cg01574673	chr1	156595164	156595165	HAPLN2	60484	6077	CGI	FALSE	TRUE	FALSE
cg01574788	chr16	12184133	12184134	SNX29	92017	113530	CGI	FALSE	TRUE	FALSE
cg01577187	chr2	106362832	106362833	NCK2	8440	1311	CGI	FALSE	TRUE	FALSE
cg01578585	chr16	19721878	19721879	IQCK	124152	-5898	Non-CGI	FALSE	TRUE	FALSE
cg01579024	chr5	170288757	170288758	RANBP17	64901	-137	CGI-N-Shore	TRUE	FALSE	FALSE
cg01580888	chr19	33556060	33556061	RHPN2	85415	-235	CGI	TRUE	FALSE	FALSE
cg01581222	chr19	10958952	10958953	C19orf38	255809	-152	Non-CGI	TRUE	FALSE	FALSE
cg01581360	chr12	122986464	122986465	ZCCHC8	55596	-920	CGI-S-Shore	TRUE	FALSE	FALSE
cg01581974	chr12	49658713	49658714	PRPH	5630	-30194	CGI	TRUE	TRUE	FALSE
cg01588592	chr1	157069325	157069326	ETV3L	440695	273	Non-CGI	TRUE	FALSE	FALSE
cg01590338	chr14	101831332	101831333	MIR1247	100302145	195425	CGI	FALSE	FALSE	TRUE
cg01592387	chr4	7774382	7774383	AFAP1-AS1	84740	18564	CGI-N-Shore	FALSE	TRUE	FALSE
cg01595951	chr5	54834655	54834656	PPAP2A	8611	-3781	CGI-S-Shelf	FALSE	FALSE	TRUE
cg01597387	chr14	24458208	24458209	DHRS4L1	728635	19124	CGI	TRUE	TRUE	FALSE
cg01601476	chr9	112080848	112080849	EPB41L4B	54566	2171	CGI-N-Shore	FALSE	TRUE	FALSE
cg01602621	chr19	11689813	11689814	ACP5	54	-11	CGI	TRUE	FALSE	FALSE
cg01603912	chr16	88039185	88039186	BANP	54971	54946	CGI-N-Shore	FALSE	TRUE	FALSE
cg01607625	chr6	32847830	32847831	LOC100294145	100294145	-14121	CGI	FALSE	FALSE	TRUE
cg01610123	chr5	134770100	134770101	C5orf20	140947	12936	Non-CGI	FALSE	FALSE	TRUE
cg01610979	chr4	8193310	8193311	SH3TC1	54436	-7748	CGI	FALSE	FALSE	TRUE
cg01612285	chr21	42549684	42549685	PLAC4	191585	7480	Non-CGI	TRUE	TRUE	FALSE
cg01612681	chr11	2322386	2322387	C11orf21	29125	755	Non-CGI	TRUE	TRUE	FALSE
cg01613817	chr21	39870397	39870398	ERG	2078	163305	Non-CGI	TRUE	TRUE	FALSE
cg01618151	chr6	35707957	35707958	ARMC12	221481	3097	Non-CGI	FALSE	TRUE	FALSE
cg01619533	chr16	89421770	89421771	LOC100287036	100287036	34228	CGI	FALSE	TRUE	FALSE
cg01622006	chr6	170463397	170463398	LOC154449	154449	108258	CGI	FALSE	FALSE	TRUE
cg01622606	chr2	38357409	38357410	CYP1B1-AS1	285154	-836	Non-CGI	TRUE	FALSE	FALSE
cg01623008	chr15	51115739	51115740	SPPL2A	84888	-57828	Non-CGI	FALSE	FALSE	TRUE
cg01623438	chr20	57582894	57582895	CTSZ	1522	-584	CGI-S-Shore	TRUE	FALSE	FALSE
cg01627750	chr5	139228242	139228243	PSD2	84249	52835	CGI	FALSE	TRUE	FALSE
cg01627823	chr14	37125531	37125532	PAX9	5083	-1240	CGI	TRUE	FALSE	FALSE
cg01631215	chr3	67706047	67706048	SUCLG2	8801	-1008	CGI-S-Shore	TRUE	TRUE	FALSE
cg01631319	chr1	214158149	214158150	PROX1	5629	-3135	CGI-S-Shore	FALSE	FALSE	TRUE
cg01635063	chr19	728385	728386	PALM	5064	19431	CGI	FALSE	TRUE	FALSE
cg01635193	chr17	42092472	42092473	TMEM101	84336	-56	CGI-S-Shore	TRUE	FALSE	FALSE
cg01635555	chr16	73101264	73101265	ZFHX3	463	-8729	CGI-S-Shore	FALSE	FALSE	TRUE
cg01636910	chr1	85740751	85740752	LOC646626	646626	-1288	CGI-N-Shore	TRUE	TRUE	FALSE
cg01637011	chr1	200992964	200992965	KIF21B	23046	-135	CGI	TRUE	FALSE	FALSE
cg01638741	chr16	54404381	54404382	IRX3	79191	-84002	CGI-N-Shore	FALSE	FALSE	TRUE
cg01641371	chr17	26712092	26712093	VTN	7448	-14718	CGI	FALSE	TRUE	FALSE
cg01642550	chr16	89098327	89098328	CBFA2T3	863	-54822	CGI-N-Shelf	FALSE	FALSE	TRUE
cg01644850	chr19	58193231	58193232	ZNF776	284309	-124	CGI	TRUE	FALSE	FALSE
cg01645295	chr20	61560630	61560631	DIDO1	11083	8672	CGI	FALSE	TRUE	FALSE
cg01646461	chr6	167536086	167536087	GPR31	2853	35231	Non-CGI	TRUE	TRUE	FALSE
cg01649611	chr2	43521066	43521067	LOC100129726	100129726	66715	CGI-N-Shelf	FALSE	TRUE	FALSE
cg01650818	chr15	29247458	29247459	APBA2	321	116289	Non-CGI	FALSE	TRUE	FALSE
cg01656244	chr8	65284080	65284081	LOC100130155	100130155	-1693	CGI	TRUE	FALSE	FALSE
cg01657758	chr11	121349740	121349741	SORL1	6653	26827	CGI	FALSE	TRUE	FALSE
cg01659176	chr1	214154936	214154937	PROX1	5629	-6348	CGI-S-Shore	FALSE	FALSE	TRUE
cg01662455	chr19	17487896	17487897	PLVAP	83483	239	CGI	TRUE	FALSE	FALSE
cg01663970	chr12	125299686	125299687	SCARB1	949	48831	CGI	FALSE	TRUE	FALSE
cg01664241	chr4	73435425	73435426	ADAMTS3	9508	-908	CGI	TRUE	FALSE	FALSE
cg01666652	chr14	22987689	22987690	DAD1	1603	70452	Non-CGI	TRUE	TRUE	FALSE
cg01666716	chr8	29493005	29493006	LINC00589	619351	112618	Non-CGI	FALSE	FALSE	TRUE
cg01667702	chr17	7836604	7836605	CNTROB	116840	1161	CGI-S-Shore	TRUE	TRUE	FALSE
cg01668008	chr8	134701487	134701488	ST3GAL1	6482	-117303	Non-CGI	FALSE	FALSE	TRUE
cg01678292	chr8	41522873	41522874	MIR486	619554	-4846	CGI-S-Shelf	TRUE	TRUE	FALSE
cg01681098	chr11	128566009	128566010	FLI1-AS1	100507392	-90	CGI-S-Shore	TRUE	TRUE	FALSE
cg01683044	chr12	54410632	54410633	HOXC4	3221	-8	CGI	TRUE	FALSE	FALSE
cg01684881	chr17	42635419	42635420	FZD2	2535	606	CGI	TRUE	FALSE	FALSE
cg01688688	chr5	140614000	140614001	PCDHB18	54660	61	CGI	TRUE	FALSE	FALSE
cg01688936	chr16	30770794	30770795	RNF40	9810	-2137	CGI-N-Shore	FALSE	TRUE	FALSE
cg01689239	chr12	48592635	48592636	OR10AD1	121275	4438	CGI	FALSE	FALSE	TRUE
cg01689404	chr17	35423942	35423943	MIR2909	100422969	32899	CGI	FALSE	FALSE	TRUE
cg01691104	chr17	71612776	71612777	SDK2	54549	27449	Non-CGI	FALSE	TRUE	FALSE
cg01692639	chr6	99273568	99273569	POU3F2	5454	-9010	CGI	FALSE	FALSE	TRUE
cg01693305	chr1	19813311	19813312	CAPZB	832	-1244	CGI-S-Shore	TRUE	FALSE	FALSE
cg01693328	chr7	108101162	108101163	NRCAM	4897	-4320	CGI-S-Shelf	FALSE	FALSE	TRUE
cg01697163	chr22	38035301	38035302	SH3BP1	23616	4639	CGI-N-Shore	TRUE	TRUE	FALSE
cg01697865	chr11	117856007	117856008	IL10RA	3587	-1097	CGI-N-Shore	TRUE	FALSE	FALSE
cg01699600	chr16	88844726	88844727	PIEZO1	9780	6644	CGI-S-Shore	FALSE	TRUE	FALSE
cg01700462	chr20	45179230	45179231	OCSTAMP	128506	-16	Non-CGI	TRUE	FALSE	FALSE
cg01703780	chr2	192353242	192353243	NABP1	64859	-189554	Non-CGI	FALSE	FALSE	TRUE
cg01711322	chr1	200842126	200842127	GPR25	2848	-38	CGI-N-Shore	TRUE	FALSE	FALSE
cg01711344	chr11	67770404	67770405	UNC93B1	81622	1187	CGI-N-Shore	FALSE	TRUE	FALSE
cg01712737	chr2	241394345	241394346	MIR149	406941	-1071	CGI-S-Shore	TRUE	TRUE	FALSE
cg01715248	chr9	93953608	93953609	LOC100129316	100129316	-116193	CGI-N-Shelf	FALSE	FALSE	TRUE
cg01715745	chr1	54930156	54930157	SSBP3	23648	-58063	Non-CGI	FALSE	FALSE	TRUE
cg01716223	chr13	53023979	53023980	VPS36	51028	782	CGI-N-Shore	FALSE	TRUE	FALSE
cg01716975	chr8	65292373	65292374	MIR124-2	406908	666	CGI	FALSE	TRUE	FALSE
cg01719718	chr13	36458809	36458810	MIR548F5	100302239	56571	Non-CGI	FALSE	TRUE	FALSE
cg01723148	chr12	58021295	58021296	B4GALNT1	2583	5688	CGI	FALSE	TRUE	FALSE
cg01723606	chr7	101944275	101944276	MIR4285	100422858	7905	CGI	FALSE	TRUE	FALSE
cg01725531	chr8	23082789	23082790	LOC389641	389641	54	CGI	TRUE	FALSE	FALSE
cg01727145	chr2	220313422	220313423	SPEG	10290	13721	CGI	TRUE	TRUE	FALSE
cg01729125	chr4	78996164	78996165	FRAS1	80144	17439	Non-CGI	FALSE	TRUE	FALSE
cg01735080	chr14	99599734	99599735	BCL11B	64919	138086	Non-CGI	FALSE	FALSE	TRUE
cg01735277	chr15	75077691	75077692	CSK	1445	3265	CGI-S-Shelf	FALSE	TRUE	FALSE
cg01738164	chr14	90147503	90147504	FOXN3	1112	-62008	Non-CGI	FALSE	FALSE	TRUE
cg01738524	chr16	68702627	68702628	CDH3	1001	24475	Non-CGI	FALSE	TRUE	FALSE
cg01739831	chr16	89922539	89922540	TCF25	22980	-17453	CGI	FALSE	TRUE	FALSE
cg01742428	chr6	116782500	116782501	FAM26F	441168	-54	CGI-N-Shore	TRUE	FALSE	FALSE
cg01748627	chr11	67272202	67272203	PITPNM1	9600	639	CGI	TRUE	TRUE	FALSE
cg01751320	chr14	23574656	23574657	ACIN1	22985	-9832	CGI-N-Shelf	TRUE	FALSE	FALSE
cg01751800	chr4	77820391	77820392	SOWAHB	345079	-1388	CGI-S-Shore	TRUE	FALSE	FALSE
cg01752203	chr2	15948462	15948463	MYCN	4613	-132219	CGI	FALSE	FALSE	TRUE
cg01752594	chr13	50696070	50696071	DLEU2	8847	3605	CGI-N-Shore	FALSE	TRUE	FALSE
cg01753544	chr11	64509592	64509593	RASGRP2	10235	3334	CGI	TRUE	TRUE	FALSE
cg01755541	chr16	67428324	67428325	TPPP3	51673	-902	CGI	TRUE	TRUE	FALSE
cg01759136	chr6	27242945	27242946	PRSS16	10279	27442	CGI	FALSE	FALSE	TRUE
cg01761966	chr6	52173014	52173015	MCM3	4172	-23431	CGI-S-Shore	FALSE	FALSE	TRUE
cg01763090	chr15	31775406	31775407	KLF13	51621	156322	CGI	FALSE	TRUE	FALSE
cg01763690	chr2	95666377	95666378	MAL	4118	-25100	CGI-S-Shore	FALSE	FALSE	TRUE
cg01765164	chr16	84953424	84953425	ZDHHC7	55625	91715	Non-CGI	FALSE	FALSE	TRUE
cg01765653	chr6	29599160	29599161	GABBR1	2550	1800	CGI-N-Shore	FALSE	TRUE	FALSE
cg01766850	chr6	170580966	170580967	LOC154449	154449	-9308	CGI	FALSE	FALSE	TRUE
cg01769428	chr15	100651659	100651660	ADAMTS17	170691	230522	Non-CGI	FALSE	TRUE	FALSE
cg01771065	chr14	102102407	102102408	DIO3	1735	74718	CGI-S-Shore	FALSE	FALSE	TRUE
cg01771247	chr16	61846623	61846624	CDH8	1006	224114	Non-CGI	FALSE	TRUE	FALSE
cg01774027	chr19	947712	947713	ARID3A	1820	21674	CGI	FALSE	TRUE	FALSE
cg01779765	chr14	62583795	62583796	LINC00643	646113	-278	CGI	TRUE	FALSE	FALSE
cg01780164	chr14	70343734	70343735	SMOC1	64093	-2378	CGI-N-Shelf	FALSE	FALSE	TRUE
cg01784265	chr4	25080650	25080651	LGI2	55203	-48235	Non-CGI	FALSE	FALSE	TRUE
cg01787798	chr1	175474437	175474438	TNR	7143	238313	CGI	FALSE	TRUE	FALSE
cg01789150	chr1	28241495	28241496	RPA2	6118	-258	CGI	TRUE	FALSE	FALSE
cg01790464	chr14	23623935	23623936	SLC7A8	23428	28912	CGI	TRUE	TRUE	FALSE
cg01798786	chr16	86968386	86968387	FOXL1	2300	356270	CGI-S-Shelf	FALSE	FALSE	TRUE
cg01799418	chr3	117428927	117428928	LSAMP-AS3	285194	1000291	Non-CGI	FALSE	FALSE	TRUE
cg01799602	chr17	26894979	26894980	PIGS	94005	3906	CGI-N-Shelf	FALSE	TRUE	FALSE
cg01800253	chr22	22290866	22290867	PPM1F	9647	16382	CGI-N-Shore	FALSE	TRUE	FALSE
cg01800297	chr5	113394591	113394592	KCNN2	3781	-303423	CGI-S-Shelf	FALSE	FALSE	TRUE
cg01801826	chr8	1766281	1766282	MIR596	693181	883	CGI	FALSE	FALSE	TRUE
cg01804429	chr4	69216077	69216078	YTHDC1	91746	-252	CGI-S-Shore	TRUE	FALSE	FALSE
cg01804934	chr6	33041229	33041230	HLA-DPB1	3115	-2472	Non-CGI	FALSE	TRUE	FALSE
cg01806151	chr1	2470965	2470966	HES5	388585	-9280	CGI-N-Shore	FALSE	FALSE	TRUE
cg01810111	chr6	27637395	27637396	LOC100507173	100507173	-24417	CGI	FALSE	FALSE	TRUE
cg01810875	chr12	54891213	54891214	NCKAP1L	3071	-280	Non-CGI	TRUE	FALSE	FALSE
cg01811272	chr2	47276456	47276457	MCFD2	90411	-107461	Non-CGI	FALSE	TRUE	FALSE
cg01814027	chr8	71923401	71923402	XKR9	389668	341800	Non-CGI	FALSE	FALSE	TRUE
cg01815538	chr6	100054615	100054616	PRDM13	59336	-33	CGI	TRUE	FALSE	FALSE
cg01818121	chr15	72476917	72476918	GRAMD2	196996	13217	CGI	FALSE	TRUE	FALSE
cg01820665	chr22	23909177	23909178	IGLL1	3543	13316	CGI	FALSE	FALSE	TRUE
cg01821022	chr12	42775908	42775909	PPHLN1	51535	55960	Non-CGI	FALSE	TRUE	FALSE
cg01826254	chr16	87609929	87609930	JPH3	57338	-25510	Non-CGI	FALSE	FALSE	TRUE
cg01827012	chr7	98603440	98603441	MIR3609	100500819	124166	CGI-S-Shore	FALSE	TRUE	FALSE
cg01828650	chr7	112430614	112430615	TMEM168	64418	-135	CGI	TRUE	FALSE	FALSE
cg01829002	chr5	50259133	50259134	PARP8	79668	297399	CGI	FALSE	FALSE	TRUE
cg01829817	chr16	86774519	86774520	FOXL1	2300	162403	CGI	FALSE	FALSE	TRUE
cg01830154	chr17	1134911	1134912	BHLHA9	727857	-38945	CGI-S-Shore	FALSE	FALSE	TRUE
cg01832549	chr1	19774989	19774990	CAPZB	832	37075	Non-CGI	FALSE	TRUE	FALSE
cg01833470	chr1	36270210	36270211	2004-08-01	192670	-3616	CGI-N-Shelf	FALSE	FALSE	TRUE
cg01833890	chr12	2564063	2564064	LOC283440	283440	316770	Non-CGI	FALSE	TRUE	FALSE
cg01835506	chr2	127415590	127415591	GYPC	2995	1905	CGI-S-Shore	FALSE	TRUE	FALSE
cg01835695	chr5	180230959	180230960	MGAT1	4245	11580	CGI	TRUE	TRUE	FALSE
cg01836724	chr5	83196022	83196023	HAPLN1	1404	-179125	Non-CGI	FALSE	FALSE	TRUE
cg01837410	chr5	101631990	101631991	SLCO4C1	353189	261	CGI	TRUE	FALSE	FALSE
cg01843189	chr9	100612587	100612588	FOXE1	2304	-2948	CGI-S-Shore	FALSE	FALSE	TRUE
cg01843506	chr3	32993165	32993166	CCR4	1233	98	Non-CGI	TRUE	FALSE	FALSE
cg01843899	chr12	57637915	57637916	NDUFA4L2	56901	-3439	CGI-S-Shore	FALSE	TRUE	FALSE
cg01850269	chr6	100903227	100903228	SIM1	6492	9576	CGI	FALSE	TRUE	FALSE
cg01851399	chr12	33050217	33050218	PKP2	5318	-436	CGI	TRUE	FALSE	FALSE
cg01851450	chr6	146864335	146864336	RAB32	10981	-491	CGI	TRUE	FALSE	FALSE
cg01852476	chr1	2232063	2232064	LOC100129534	100129534	52035	CGI-N-Shore	FALSE	TRUE	FALSE
cg01859669	chr6	167571328	167571329	GPR31	2853	-8	Non-CGI	TRUE	FALSE	FALSE
cg01864825	chr5	14585625	14585626	FAM105A	54491	3733	CGI-S-Shelf	FALSE	TRUE	FALSE
cg01866431	chr12	129417669	129417670	GLT1D1	144423	79587	CGI	FALSE	TRUE	FALSE
cg01867764	chr14	22986466	22986467	DAD1	1603	71675	Non-CGI	TRUE	TRUE	FALSE
cg01869219	chr2	224702789	224702790	AP1S3	130340	-469	CGI-S-Shore	TRUE	FALSE	FALSE
cg01870834	chr8	145002835	145002836	MIR661	724031	16610	CGI-S-Shore	FALSE	TRUE	FALSE
cg01872593	chr14	54446260	54446261	BMP4	652	-22705	Non-CGI	FALSE	FALSE	TRUE
cg01880463	chr20	45179413	45179414	OCSTAMP	128506	-199	Non-CGI	TRUE	FALSE	FALSE
cg01883155	chr17	74565009	74565010	SNORD1A	677848	7293	CGI	FALSE	TRUE	FALSE
cg01883777	chr22	38201848	38201849	H1F0	3005	733	CGI-S-Shore	TRUE	FALSE	FALSE
cg01888395	chr9	132145105	132145106	C9orf106	414318	61809	CGI-N-Shore	FALSE	FALSE	TRUE
cg01889010	chr2	242785524	242785525	PDCD1	5133	15532	CGI	FALSE	FALSE	TRUE
cg01889143	chr5	134825791	134825792	TIFAB	497189	-37701	CGI	FALSE	FALSE	TRUE
cg01890568	chr17	31437649	31437650	SPACA3	124912	118766	Non-CGI	FALSE	TRUE	FALSE
cg01896761	chr3	13590444	13590445	FBLN2	2199	16619	CGI-N-Shore	TRUE	TRUE	FALSE
cg01899318	chr16	71523395	71523396	ZNF19	7567	-140	CGI	TRUE	FALSE	FALSE
cg01901101	chr1	9486939	9486940	SLC25A33	84275	-112587	CGI-N-Shore	FALSE	FALSE	TRUE
cg01902845	chr1	214170993	214170994	PROX1	5629	9706	CGI	FALSE	TRUE	FALSE
cg01904410	chr11	31836673	31836674	DKFZp686K1684	440034	-1439	CGI-S-Shore	TRUE	TRUE	FALSE
cg01905090	chr1	101023062	101023063	GPR88	54112	19333	Non-CGI	FALSE	FALSE	TRUE
cg01905967	chr5	172185201	172185202	DUSP1	1843	13000	Non-CGI	FALSE	FALSE	TRUE
cg01911613	chr3	196325238	196325239	FBXO45	200933	29512	CGI	FALSE	FALSE	TRUE
cg01915609	chr6	146864388	146864389	RAB32	10981	-438	CGI	TRUE	FALSE	FALSE
cg01916088	chr6	41528531	41528532	FOXP4	116113	14366	CGI	FALSE	TRUE	FALSE
cg01917080	chr12	1772504	1772505	MIR3649	100500816	-2957	CGI	FALSE	FALSE	TRUE
cg01917657	chr22	50617092	50617093	TRABD	80305	-7265	CGI	FALSE	TRUE	FALSE
cg01921323	chr7	153881192	153881193	DPP6	1804	296772	Non-CGI	FALSE	TRUE	FALSE
cg01924223	chr8	42033498	42033499	AP3M2	10947	23033	CGI-N-Shelf	FALSE	TRUE	FALSE
cg01925950	chr13	115022228	115022229	CDC16	8881	21865	Non-CGI	FALSE	TRUE	FALSE
cg01928231	chr6	3502698	3502699	SLC22A23	63027	-45904	Non-CGI	FALSE	FALSE	TRUE
cg01929340	chr17	10059923	10059924	GAS7	8522	41943	Non-CGI	FALSE	TRUE	FALSE
cg01929699	chr13	36491531	36491532	MIR548F5	100302239	23849	Non-CGI	FALSE	TRUE	FALSE
cg01930756	chr5	135424444	135424445	VTRNA2-1	100126299	-8157	Non-CGI	FALSE	FALSE	TRUE
cg01935086	chr1	32674191	32674192	DCDC2B	149069	-502	CGI-S-Shelf	TRUE	TRUE	FALSE
cg01937212	chr6	32295097	32295098	C6orf10	10665	44557	Non-CGI	FALSE	TRUE	FALSE
cg01937247	chr1	1229534	1229535	SCNN1D	6339	13717	CGI	FALSE	TRUE	FALSE
cg01937819	chr9	130616110	130616111	ENG	2022	935	Non-CGI	FALSE	TRUE	FALSE
cg01940753	chr15	81069622	81069623	KIAA1199	57214	-2088	CGI-N-Shore	FALSE	FALSE	TRUE
cg01941881	chr14	105793310	105793311	BRF1	2972	-11395	CGI-S-Shore	FALSE	TRUE	FALSE
cg01944226	chr17	80188056	80188057	SLC16A3	9123	1773	CGI-S-Shore	FALSE	TRUE	FALSE
cg01945840	chr22	36013675	36013676	MB	4151	5724	Non-CGI	TRUE	TRUE	FALSE
cg01947224	chr19	58089885	58089886	ZNF416	55659	356	CGI	FALSE	TRUE	FALSE
cg01951274	chr17	56409518	56409519	MIR142	406934	-838	Non-CGI	TRUE	TRUE	FALSE
cg01951963	chr16	85942346	85942347	IRF8	3394	9571	Non-CGI	FALSE	TRUE	FALSE
cg01952226	chr8	102507382	102507383	GRHL2	79977	2713	CGI-S-Shore	FALSE	TRUE	FALSE
cg01952537	chr14	105051261	105051262	C14orf180	400258	5204	CGI-N-Shelf	TRUE	TRUE	FALSE
cg01955153	chr16	50769852	50769853	CYLD	1540	-6107	Non-CGI	FALSE	FALSE	TRUE
cg01957732	chr6	133561716	133561717	EYA4	2070	-18	CGI	TRUE	FALSE	FALSE
cg01958934	chr19	45449099	45449100	APOC2	344	-2441	Non-CGI	FALSE	TRUE	FALSE
cg01963224	chr14	71791671	71791672	SNORD56B	319139	-73381	CGI-S-Shelf	FALSE	FALSE	TRUE
cg01965462	chr2	213400697	213400698	ERBB4	2066	2653	CGI-N-Shore	FALSE	TRUE	FALSE
cg01968178	chr2	86565038	86565039	REEP1	65055	166	CGI	TRUE	TRUE	FALSE
cg01973483	chr12	123591123	123591124	LOC100507091	100507091	25191	Non-CGI	TRUE	TRUE	FALSE
cg01973676	chr7	101596404	101596405	CUX1	1523	137219	CGI-S-Shore	FALSE	TRUE	FALSE
cg01973778	chr16	83280511	83280512	MIR3182	100422853	-261438	Non-CGI	FALSE	TRUE	FALSE
cg01975495	chr7	100779017	100779018	SERPINE1	5054	8637	Non-CGI	FALSE	TRUE	FALSE
cg01976921	chr8	38342087	38342088	FGFR1	2260	-15734	Non-CGI	FALSE	FALSE	TRUE
cg01978937	chr20	2671574	2671575	EBF4	57593	-1948	CGI-N-Shore	TRUE	FALSE	FALSE
cg01982833	chr12	27174596	27174597	MED21	9412	-885	CGI-N-Shore	TRUE	FALSE	FALSE
cg01984854	chr16	85879072	85879073	COX4I1	1327	45898	CGI	FALSE	FALSE	TRUE
cg01985390	chr2	27529981	27529982	UCN	7349	1147	CGI	FALSE	TRUE	FALSE
cg01987702	chr2	74264707	74264708	TET3	200424	-8741	Non-CGI	FALSE	FALSE	TRUE
cg01991752	chr14	101014148	101014149	BEGAIN	57596	21981	CGI-S-Shore	TRUE	TRUE	FALSE
cg01992765	chr21	45622493	45622494	ICOSLG	23308	38339	CGI	FALSE	FALSE	TRUE
cg01993818	chr14	34270437	34270438	EGLN3	112399	149845	CGI-S-Shore	FALSE	TRUE	FALSE
cg01995815	chr3	139984238	139984239	CLSTN2	64084	330210	Non-CGI	FALSE	TRUE	FALSE
cg01997006	chr20	49410882	49410883	BCAS4	55653	-583	CGI	TRUE	FALSE	FALSE
cg01997629	chr1	209929622	209929623	TRAF3IP3	80342	227	Non-CGI	TRUE	FALSE	FALSE
cg01997884	chr2	224967286	224967287	SERPINE2	5270	-63249	Non-CGI	FALSE	FALSE	TRUE
cg01998808	chr16	892282	892283	PRR25	388199	36838	CGI	FALSE	FALSE	TRUE
cg02000426	chr8	1759815	1759816	MIR596	693181	-5580	CGI	FALSE	FALSE	TRUE
cg02004594	chr6	28972434	28972435	ZNF311	282890	657	CGI-N-Shore	TRUE	TRUE	FALSE
cg02006134	chr7	963333	963334	ADAP1	11033	51900	CGI	FALSE	TRUE	FALSE
cg02007236	chr12	56510655	56510656	RPL41	6171	280	CGI	TRUE	TRUE	FALSE
cg02013741	chr15	67006698	67006699	SMAD6	4091	12023	Non-CGI	FALSE	TRUE	FALSE
cg02015529	chr13	100153203	100153204	TM9SF2	9375	-523	CGI-S-Shore	TRUE	FALSE	FALSE
cg02016178	chr16	3628416	3628417	NLRC3	197358	-1023	Non-CGI	TRUE	FALSE	FALSE
cg02026204	chr22	30663007	30663008	OSM	5008	-177	CGI	TRUE	FALSE	FALSE
cg02030454	chr1	35250489	35250490	GJB3	2707	3698	CGI	TRUE	TRUE	FALSE
cg02032558	chr4	155662438	155662439	LRAT	9227	-2712	CGI	FALSE	TRUE	FALSE
cg02035605	chr12	1725867	1725868	FBXL14	144699	-22535	Non-CGI	TRUE	TRUE	FALSE
cg02039267	chr10	118894069	118894070	VAX1	11023	3741	CGI	FALSE	TRUE	FALSE
cg02042712	chr16	57702239	57702240	GPR97	222487	81	Non-CGI	TRUE	FALSE	FALSE
cg02043000	chr5	1228081	1228082	SLC6A18	348932	2610	CGI	FALSE	TRUE	FALSE
cg02048412	chr16	4421654	4421655	VASN	114990	-193	CGI-N-Shore	TRUE	TRUE	FALSE
cg02050917	chr1	2173571	2173572	SKI	6497	13436	CGI-N-Shore	FALSE	TRUE	FALSE
cg02052265	chr1	247712110	247712111	OR2C3	81472	-14968	Non-CGI	TRUE	TRUE	FALSE
cg02056653	chr5	140888468	140888469	PCDHGC5	56097	19659	CGI-N-Shelf	FALSE	TRUE	FALSE
cg02058624	chr13	112714024	112714025	SOX1	6656	-7887	CGI-S-Shore	FALSE	FALSE	TRUE
cg02059317	chr16	89024511	89024512	CBFA2T3	863	18991	CGI	FALSE	TRUE	FALSE
cg02062816	chr1	163166949	163166950	RGS5	8490	124630	Non-CGI	FALSE	TRUE	FALSE
cg02068166	chr15	62458741	62458742	C2CD4B	388125	-1258	CGI-S-Shore	TRUE	FALSE	FALSE
cg02068232	chr10	98201097	98201098	TLL2	7093	72584	Non-CGI	FALSE	TRUE	FALSE
cg02068356	chr1	64197478	64197479	ROR1	4919	-42210	Non-CGI	FALSE	FALSE	TRUE
cg02073304	chr1	33457500	33457501	RNF19B	127544	-27213	Non-CGI	FALSE	TRUE	FALSE
cg02073763	chr2	46064034	46064035	PRKCE	5581	184990	Non-CGI	FALSE	TRUE	FALSE
cg02074714	chr5	176168448	176168449	UNC5A	90249	-69110	CGI-S-Shore	FALSE	FALSE	TRUE
cg02075410	chr4	151504138	151504139	MAB21L2	10586	1060	CGI	TRUE	TRUE	FALSE
cg02079584	chr15	74528719	74528720	CCDC33	80125	51	Non-CGI	TRUE	FALSE	FALSE
cg02081019	chr5	92930813	92930814	NR2F1	7025	11769	CGI	FALSE	FALSE	TRUE
cg02082571	chr12	8276718	8276719	CLEC4A	50856	489	Non-CGI	FALSE	TRUE	FALSE
cg02082929	chr2	109068933	109068934	GCC2	9648	3355	CGI-S-Shelf	FALSE	TRUE	FALSE
cg02083836	chr1	87617350	87617351	LOC339524	339524	158659	CGI	FALSE	TRUE	FALSE
cg02084669	chr14	74707360	74707361	VSX2	338917	1184	CGI-S-Shore	FALSE	TRUE	FALSE
cg02084814	chr5	141722174	141722175	SPRY4	81848	-17553	Non-CGI	FALSE	FALSE	TRUE
cg02085507	chr19	6739192	6739193	TRIP10	9322	-513	CGI	TRUE	FALSE	FALSE
cg02087075	chr6	44226395	44226396	SLC35B2	347734	-1111	CGI-S-Shore	TRUE	TRUE	FALSE
cg02087565	chr6	170585664	170585665	LOC154449	154449	-14006	CGI	FALSE	FALSE	TRUE
cg02088237	chr6	39304008	39304009	KCNK16	83795	-13677	Non-CGI	FALSE	TRUE	FALSE
cg02088785	chr13	99223336	99223337	STK24	8428	6058	Non-CGI	FALSE	TRUE	FALSE
cg02091185	chr5	170288766	170288767	RANBP17	64901	-128	CGI-N-Shore	TRUE	FALSE	FALSE
cg02098923	chr1	167789646	167789647	ADCY10	55811	93805	CGI-S-Shore	FALSE	TRUE	FALSE
cg02099418	chr2	204571146	204571147	CD28	940	-50	Non-CGI	TRUE	FALSE	FALSE
cg02100674	chr10	83636325	83636326	NRG3	10718	1254	CGI	TRUE	TRUE	FALSE
cg02100997	chr1	29585853	29585854	PTPRU	10076	22824	CGI-N-Shore	FALSE	TRUE	FALSE
cg02102332	chr5	130851334	130851335	CDC42SE2	56990	251631	Non-CGI	FALSE	TRUE	FALSE
cg02108080	chr7	36136383	36136384	EEPD1	80820	-56451	Non-CGI	FALSE	TRUE	FALSE
cg02108645	chr8	144303773	144303774	GPIHBP1	338328	8704	CGI	FALSE	FALSE	TRUE
cg02109484	chr2	74875253	74875254	M1AP	130951	202	CGI	TRUE	TRUE	FALSE
cg02110333	chr5	1800184	1800185	MRPL36	64979	-227	CGI-S-Shore	TRUE	FALSE	FALSE
cg02110830	chr14	75331272	75331273	PROX2	283571	-734	Non-CGI	TRUE	FALSE	FALSE
cg02111655	chr10	30338246	30338247	KIAA1462	57608	66172	Non-CGI	FALSE	TRUE	FALSE
cg02114903	chr10	97324947	97324948	SORBS1	10580	-3775	CGI-S-Shelf	FALSE	FALSE	TRUE
cg02116953	chr20	20346166	20346167	INSM1	3642	-2597	CGI	FALSE	FALSE	TRUE
cg02118562	chr3	124082907	124082908	KALRN	8997	330364	CGI-N-Shelf	FALSE	TRUE	FALSE
cg02120433	chr5	3093118	3093119	C5orf38	153571	340855	CGI	FALSE	FALSE	TRUE
cg02121529	chr13	40746549	40746550	LINC00548	400123	48088	CGI	FALSE	FALSE	TRUE
cg02125316	chr5	170878209	170878210	FGF18	8817	31541	CGI	FALSE	TRUE	FALSE
cg02127509	chr6	135516936	135516937	MYB	4602	14482	Non-CGI	TRUE	TRUE	FALSE
cg02127980	chr9	137252116	137252117	MIR4669	100616236	-19139	CGI-N-Shore	FALSE	TRUE	FALSE
cg02131995	chr19	35772917	35772918	HAMP	57817	-491	CGI-S-Shelf	TRUE	FALSE	FALSE
cg02133557	chr20	61560434	61560435	DIDO1	11083	8868	CGI-N-Shore	FALSE	TRUE	FALSE
cg02134839	chr17	48260961	48260962	HILS1	373861	-11123	Non-CGI	FALSE	FALSE	TRUE
cg02135245	chr17	998711	998712	MIR3183	100422835	-72911	CGI	FALSE	TRUE	FALSE
cg02139338	chr10	134108333	134108334	LRRC27	80313	-37279	CGI-N-Shore	FALSE	TRUE	FALSE
cg02139951	chr17	1637339	1637340	SERPINF2	5345	-8789	CGI	FALSE	TRUE	FALSE
cg02146079	chr5	140724204	140724205	PCDHGA3	56112	602	CGI-S-Shore	TRUE	TRUE	FALSE
cg02156870	chr17	36717733	36717734	SRCIN1	80725	44448	CGI-S-Shore	FALSE	TRUE	FALSE
cg02156899	chr16	2029256	2029257	NOXO1	124056	2182	CGI	FALSE	TRUE	FALSE
cg02167021	chr3	121379791	121379792	HCLS1	3059	0	Non-CGI	TRUE	FALSE	FALSE
cg02172058	chr17	58499911	58499912	C17orf64	124773	45	CGI-S-Shore	TRUE	FALSE	FALSE
cg02173484	chr1	147245168	147245169	GJA5	2702	314	Non-CGI	FALSE	TRUE	FALSE
cg02175033	chr14	70098523	70098524	KIAA0247	9766	20212	Non-CGI	FALSE	TRUE	FALSE
cg02179982	chr22	46365647	46365648	WNT7B	7477	7359	CGI-N-Shore	FALSE	TRUE	FALSE
cg02181594	chr2	75792215	75792216	EVA1A	84141	4631	CGI-S-Shelf	FALSE	TRUE	FALSE
cg02182476	chr19	7538084	7538085	LOC100128573	100128573	161	CGI-S-Shore	TRUE	FALSE	FALSE
cg02183671	chr4	15779999	15780000	CD38	952	67	CGI-N-Shore	TRUE	FALSE	FALSE
cg02184413	chr6	133035235	133035236	VNN1	8876	-40	Non-CGI	TRUE	FALSE	FALSE
cg02187231	chr2	71132993	71132994	VAX2	25806	5272	CGI-S-Shore	FALSE	TRUE	FALSE
cg02189719	chr10	101418880	101418881	SLC25A28	81894	112	CGI	TRUE	TRUE	FALSE
cg02189888	chr19	46582065	46582066	IGFL4	444882	-37790	CGI	TRUE	FALSE	FALSE
cg02191909	chr6	33273716	33273717	RGL2	5863	-6550	Non-CGI	FALSE	TRUE	FALSE
cg02193146	chr1	110752257	110752258	KCNC4	3749	-1077	CGI-N-Shore	TRUE	FALSE	FALSE
cg02203067	chr16	87866800	87866801	SLC7A5	8140	36298	CGI	FALSE	TRUE	FALSE
cg02205445	chr2	144648543	144648544	GTDC1	79712	441538	Non-CGI	FALSE	FALSE	TRUE
cg02206108	chr22	40079626	40079627	CACNA1I	8911	112867	CGI-N-Shelf	FALSE	TRUE	FALSE
cg02210967	chr7	5572794	5572795	ACTB	60	-2561	CGI-S-Shelf	FALSE	FALSE	TRUE
cg02211741	chr11	46383924	46383925	MIR4688	100616368	-14026	Non-CGI	FALSE	TRUE	FALSE
cg02212575	chr3	156838403	156838404	LOC339894	339894	2386	CGI	FALSE	TRUE	FALSE
cg02212836	chr6	6589075	6589076	LY86	9450	140	Non-CGI	TRUE	TRUE	FALSE
cg02213139	chr1	85527754	85527755	WDR63	126820	-237	CGI-N-Shore	TRUE	FALSE	FALSE
cg02217713	chr7	643155	643156	FLJ44511	441307	83126	CGI-S-Shore	TRUE	TRUE	FALSE
cg02217815	chr22	36890079	36890080	TXN2	25828	-12391	Non-CGI	FALSE	TRUE	FALSE
cg02220008	chr6	13192742	13192743	LOC100130357	100130357	103074	Non-CGI	FALSE	TRUE	FALSE
cg02222844	chr3	48694451	48694452	MIR4793	100616112	-12737	CGI	FALSE	TRUE	FALSE
cg02224002	chr16	88769526	88769527	RNF166	115992	3301	CGI	TRUE	TRUE	FALSE
cg02225720	chr17	3623472	3623473	GSG2	83903	-3723	CGI-N-Shelf	FALSE	TRUE	FALSE
cg02226079	chr3	190971216	190971217	OSTN	344901	40893	Non-CGI	FALSE	FALSE	TRUE
cg02226645	chr8	65291287	65291288	MIR124-2	406908	-417	CGI-S-Shore	TRUE	TRUE	FALSE
cg02229095	chr8	146011663	146011664	ZNF34	80778	1060	CGI-N-Shore	FALSE	TRUE	FALSE
cg02229135	chr13	36053118	36053119	MIR548F5	100302239	462262	CGI	FALSE	TRUE	FALSE
cg02229382	chr22	49765138	49765139	C22orf34	348645	286050	CGI	FALSE	FALSE	TRUE
cg02230495	chr2	191164962	191164963	HIBCH	26275	19807	Non-CGI	FALSE	TRUE	FALSE
cg02231062	chr22	42321087	42321088	TNFRSF13C	115650	1732	CGI-N-Shore	FALSE	TRUE	FALSE
cg02231066	chr3	52567130	52567131	NT5DC2	64943	1961	CGI	FALSE	TRUE	FALSE
cg02236673	chr11	117957569	117957570	TMPRSS4-AS1	100526771	-60	Non-CGI	TRUE	TRUE	FALSE
cg02237629	chr14	57264095	57264096	OTX2	5015	13087	CGI	FALSE	FALSE	TRUE
cg02238453	chr16	77246048	77246049	SYCE1L	100130958	12698	CGI	TRUE	TRUE	FALSE
cg02239163	chr4	7720084	7720085	AFAP1-AS1	84740	-35731	CGI	FALSE	TRUE	FALSE
cg02239258	chr8	8241752	8241753	SGK223	157285	-2494	CGI-N-Shore	FALSE	FALSE	TRUE
cg02240252	chr17	47931591	47931592	TAC4	255061	-6211	CGI-S-Shelf	FALSE	FALSE	TRUE
cg02240622	chr15	40601467	40601468	PLCB2	5330	-1292	Non-CGI	TRUE	FALSE	FALSE
cg02240748	chr16	1057796	1057797	SOX8	30812	25987	CGI-N-Shelf	FALSE	FALSE	TRUE
cg02243495	chr17	48227139	48227140	PPP1R9B	84687	736	CGI	FALSE	TRUE	FALSE
cg02243522	chr8	129061054	129061055	MIR1207	100302175	-342	Non-CGI	TRUE	TRUE	FALSE
cg02244028	chr3	38992200	38992201	SCN11A	11280	-147	CGI-N-Shore	TRUE	FALSE	FALSE
cg02250764	chr5	134878149	134878150	NEUROG1	4762	-6509	CGI-N-Shore	FALSE	FALSE	TRUE
cg02253760	chr3	147077616	147077617	ZIC4	84107	46978	CGI-S-Shore	FALSE	FALSE	TRUE
cg02254407	chr11	73357159	73357160	PLEKHB1	58473	-62	Non-CGI	TRUE	FALSE	FALSE
cg02255004	chr4	80748660	80748661	GDEP	118425	34	Non-CGI	TRUE	FALSE	FALSE
cg02255098	chr19	45317924	45317925	BCAM	4059	5585	CGI-S-Shore	FALSE	TRUE	FALSE
cg02257953	chr14	54816093	54816094	CDKN3	1033	-47578	CGI	FALSE	FALSE	TRUE
cg02259429	chr14	93993173	93993174	COX8C	341947	179635	Non-CGI	FALSE	TRUE	FALSE
cg02259914	chr20	3693221	3693222	SIGLEC1	6614	-5445	Non-CGI	FALSE	FALSE	TRUE
cg02261604	chr17	41150673	41150674	RPL27	6155	226	CGI	FALSE	TRUE	FALSE
cg02264459	chr16	3199771	3199772	ZNF213	7760	14713	CGI	TRUE	TRUE	FALSE
cg02266731	chr12	69357333	69357334	CPM	1368	-312	Non-CGI	TRUE	FALSE	FALSE
cg02267270	chr6	37616410	37616411	MDGA1	266727	49354	CGI	TRUE	TRUE	FALSE
cg02267483	chr5	140810404	140810405	PCDHGA12	26025	245	CGI	TRUE	TRUE	FALSE
cg02268192	chr14	92981666	92981667	RIN3	79890	1540	CGI-S-Shore	FALSE	TRUE	FALSE
cg02270689	chr2	64836235	64836236	LOC339807	339807	1788	CGI-N-Shore	FALSE	TRUE	FALSE
cg02271560	chr2	55450737	55450738	RPS27A	6233	-8300	CGI	FALSE	TRUE	FALSE
cg02271790	chr6	10381196	10381197	LOC100130275	100130275	-31353	CGI-N-Shore	FALSE	FALSE	TRUE
cg02272859	chr4	25656514	25656515	SLC34A2	10568	-919	CGI-N-Shore	TRUE	FALSE	FALSE
cg02272968	chr6	32015773	32015774	CYP21A2	1589	9679	CGI-N-Shore	TRUE	TRUE	FALSE
cg02273647	chr14	45722745	45722746	MIS18BP1	55320	-139	CGI	TRUE	FALSE	FALSE
cg02273797	chr1	33191153	33191154	KIAA1522	57648	-16357	Non-CGI	FALSE	FALSE	TRUE
cg02276274	chr3	3839921	3839922	LRRN1	57633	-1198	CGI-N-Shore	TRUE	TRUE	FALSE
cg02276831	chr9	35406117	35406118	ATP8B5P	158381	-633	Non-CGI	TRUE	FALSE	FALSE
cg02277530	chr17	75396462	75396463	MIR4316	100422851	-3325	CGI-N-Shore	TRUE	TRUE	FALSE
cg02283151	chr14	100110845	100110846	HHIPL1	84439	-633	CGI-N-Shore	TRUE	FALSE	FALSE
cg02286380	chr17	4621205	4621206	ARRB2	409	7415	Non-CGI	TRUE	TRUE	FALSE
cg02286717	chr10	75415704	75415705	SYNPO2L	79933	126	Non-CGI	TRUE	FALSE	FALSE
cg02287007	chr6	166877038	166877039	MIR1913	100302141	45881	CGI	FALSE	TRUE	FALSE
cg02289754	chr1	47068636	47068637	MOB3C	148932	13925	CGI-N-Shore	FALSE	TRUE	FALSE
cg02289903	chr6	166876736	166876737	MIR1913	100302141	46183	CGI	FALSE	TRUE	FALSE
cg02292809	chr6	17101478	17101479	STMND1	401236	-1009	CGI-N-Shore	TRUE	FALSE	FALSE
cg02296931	chr1	1144658	1144659	TNFRSF18	8784	-2568	CGI	FALSE	FALSE	TRUE
cg02297967	chr8	57473034	57473035	LOC100507632	100507632	-651	Non-CGI	TRUE	FALSE	FALSE
cg02300279	chr9	120507179	120507180	TLR4	7099	40718	CGI-N-Shore	FALSE	FALSE	TRUE
cg02302670	chr8	21904079	21904080	FGF17	8822	3650	CGI-N-Shore	FALSE	TRUE	FALSE
cg02303805	chr7	148582347	148582348	EZH2	2146	-905	CGI-S-Shore	TRUE	FALSE	FALSE
cg02305113	chr7	2059212	2059213	MIR4655	100616160	-175322	CGI	FALSE	TRUE	FALSE
cg02307597	chr19	17402942	17402943	ANKLE1	126549	10487	CGI	FALSE	TRUE	FALSE
cg02311152	chr14	71276396	71276397	MAP3K9	4293	-507	CGI	TRUE	FALSE	FALSE
cg02311801	chr11	73070760	73070761	RELT	84957	-16643	CGI-N-Shelf	FALSE	TRUE	FALSE
cg02313495	chr15	40398007	40398008	BMF	90427	3066	CGI-N-Shelf	TRUE	TRUE	FALSE
cg02315926	chr14	70140384	70140385	SRSF5	6430	-53233	Non-CGI	FALSE	TRUE	FALSE
cg02316066	chr7	55224910	55224911	EGFR	1956	138184	CGI	FALSE	TRUE	FALSE
cg02318926	chr15	83952345	83952346	BNC1	646	1121	CGI	TRUE	TRUE	FALSE
cg02318971	chr11	64739714	64739715	C11orf85	283129	-156	CGI	TRUE	FALSE	FALSE
cg02323003	chr10	130525659	130525660	MKI67	4288	-601190	Non-CGI	FALSE	FALSE	TRUE
cg02326386	chr19	2085286	2085287	MOB3A	126308	10981	Non-CGI	TRUE	TRUE	FALSE
cg02328239	chr5	37837463	37837464	GDNF	2668	2317	CGI	TRUE	TRUE	FALSE
cg02329430	chr15	73921385	73921386	NPTN	27020	4366	CGI-N-Shelf	FALSE	TRUE	FALSE
cg02331025	chr5	37835965	37835966	GDNF	2668	3815	CGI	TRUE	TRUE	FALSE
cg02331561	chr16	2391081	2391082	ABCA3	21	-333	CGI	TRUE	TRUE	FALSE
cg02334109	chr15	26044050	26044051	MIR4715	100616474	49920	CGI	FALSE	TRUE	FALSE
cg02335533	chr12	28124870	28124871	PTHLH	5744	44	CGI-S-Shore	TRUE	FALSE	FALSE
cg02336827	chr3	45636190	45636191	LIMD1	8994	-131	CGI-S-Shore	TRUE	FALSE	FALSE
cg02339122	chr17	54245140	54245141	ANKFN1	162282	14303	Non-CGI	FALSE	TRUE	FALSE
cg02341119	chr17	74866479	74866480	MGAT5B	146664	1680	CGI	FALSE	TRUE	FALSE
cg02343254	chr2	3583963	3583964	RNASEH1	246243	21975	Non-CGI	FALSE	FALSE	TRUE
cg02344527	chr11	102702414	102702415	MMP3	4314	11926	CGI	FALSE	TRUE	FALSE
cg02344606	chr7	112062297	112062298	IFRD1	3475	-900	Non-CGI	TRUE	FALSE	FALSE
cg02346790	chr3	122296409	122296410	PARP15	165631	-38	CGI-N-Shore	TRUE	FALSE	FALSE
cg02347573	chr10	13931592	13931593	PRPF18	8559	302652	CGI-N-Shore	FALSE	TRUE	FALSE
cg02351745	chr1	23763450	23763451	TCEA3	6920	-12188	CGI	TRUE	TRUE	FALSE
cg02352281	chr3	46139305	46139306	CCR3	1232	-65789	Non-CGI	FALSE	FALSE	TRUE
cg02356435	chr3	16925533	16925534	MIR3714	100500913	-49153	CGI	TRUE	TRUE	FALSE
cg02357336	chr1	87617142	87617143	LOC339524	339524	158451	CGI-N-Shore	FALSE	TRUE	FALSE
cg02357751	chr22	19710880	19710881	SEPT5-GP1BB	100526833	8892	CGI	TRUE	TRUE	FALSE
cg02357838	chr12	112847022	112847023	RPL6	6128	419	CGI	FALSE	TRUE	FALSE
cg02358862	chr16	30197211	30197212	CORO1A	11151	2479	CGI-S-Shore	TRUE	TRUE	FALSE
cg02359712	chr5	77280597	77280598	TBCA	6902	-208411	CGI-N-Shelf	FALSE	FALSE	TRUE
cg02360002	chr6	170585777	170585778	DLL1	28514	13918	CGI	FALSE	FALSE	TRUE
cg02364551	chr1	48176118	48176119	FOXD2	2306	274428	CGI	FALSE	FALSE	TRUE
cg02365079	chr12	130195357	130195358	TMEM132D	121256	192853	CGI	FALSE	TRUE	FALSE
cg02366100	chr16	85295997	85295998	LINC00311	197196	-20565	CGI	FALSE	FALSE	TRUE
cg02367708	chr2	136873789	136873790	CXCR4	7852	1934	CGI-N-Shore	TRUE	TRUE	FALSE
cg02375320	chr2	38978881	38978882	GEMIN6	79833	204	CGI	TRUE	FALSE	FALSE
cg02380334	chr14	70038925	70038926	CCDC177	56936	-1006	CGI	TRUE	FALSE	FALSE
cg02381853	chr5	33321127	33321128	TARS	6897	-119769	Non-CGI	FALSE	FALSE	TRUE
cg02384543	chr19	58879857	58879858	A1BG	1	-5642	CGI	TRUE	TRUE	FALSE
cg02385661	chr19	13215729	13215730	LYL1	4066	-1754	CGI-S-Shore	TRUE	TRUE	FALSE
cg02386311	chr16	12073297	12073298	SNX29	92017	2694	CGI-S-Shelf	FALSE	TRUE	FALSE
cg02387244	chr16	746132	746133	WDR24	84219	-5731	CGI-S-Shore	TRUE	TRUE	FALSE
cg02387803	chr3	147123457	147123458	ZIC4	84107	1137	CGI-N-Shore	TRUE	TRUE	FALSE
cg02389590	chr8	110658029	110658030	SYBU	55638	45989	CGI-S-Shore	TRUE	TRUE	FALSE
cg02390329	chr3	147113092	147113093	ZIC4	84107	11502	CGI-S-Shore	FALSE	TRUE	FALSE
cg02390624	chr11	85469919	85469920	SYTL2	54843	52257	Non-CGI	TRUE	TRUE	FALSE
cg02390801	chr15	74528565	74528566	CCDC33	80125	-100	Non-CGI	TRUE	FALSE	FALSE
cg02394186	chr1	6088550	6088551	NPHP4	261734	-36016	CGI-S-Shelf	FALSE	TRUE	FALSE
cg02394698	chr4	86594376	86594377	MIR4451	100616349	-49243	Non-CGI	FALSE	TRUE	FALSE
cg02395280	chr15	69606596	69606597	PAQR5	54852	15301	Non-CGI	TRUE	TRUE	FALSE
cg02401792	chr22	46664110	46664111	TTC38	55020	248	CGI	FALSE	TRUE	FALSE
cg02402091	chr10	114135092	114135093	ACSL5	51703	1175	Non-CGI	TRUE	TRUE	FALSE
cg02414034	chr17	5185283	5185284	RABEP1	9135	-273	CGI-N-Shore	TRUE	FALSE	FALSE
cg02419920	chr4	48486785	48486786	SLC10A4	201780	1424	CGI	FALSE	TRUE	FALSE
cg02420480	chr7	41919892	41919893	INHBA	3624	-177185	Non-CGI	FALSE	FALSE	TRUE
cg02424715	chr14	75893680	75893681	JDP2	122953	-827	CGI-N-Shore	TRUE	FALSE	FALSE
cg02434314	chr17	26577760	26577761	PPY2	23614	3289	CGI	FALSE	FALSE	TRUE
cg02435538	chr7	75507337	75507338	RHBDD2	57414	-978	CGI-N-Shore	TRUE	FALSE	FALSE
cg02438481	chr6	168199400	168199401	C6orf123	26238	-1860	CGI	TRUE	FALSE	FALSE
cg02438611	chr17	55828107	55828108	MRPS23	51649	99324	CGI	FALSE	FALSE	TRUE
cg02439077	chr10	72202215	72202216	NODAL	4838	-749	CGI-S-Shore	TRUE	FALSE	FALSE
cg02446647	chr6	133562101	133562102	EYA4	2070	364	CGI	TRUE	TRUE	FALSE
cg02448805	chr6	168916275	168916276	SMOC2	64094	74443	CGI	FALSE	TRUE	FALSE
cg02452500	chr11	13161927	13161928	RASSF10	644943	130956	Non-CGI	FALSE	FALSE	TRUE
cg02452944	chr5	140810109	140810110	PCDHGA12	26025	-47	CGI-N-Shore	TRUE	TRUE	FALSE
cg02455346	chr1	221055401	221055402	HLX	3142	2657	CGI	FALSE	TRUE	FALSE
cg02455383	chr22	27014116	27014117	CRYBB1	1414	-124	Non-CGI	TRUE	FALSE	FALSE
cg02457461	chr8	9913680	9913681	MSRA	4482	1849	CGI-S-Shore	FALSE	TRUE	FALSE
cg02457680	chr1	154475139	154475140	TDRD10	126668	443	CGI	TRUE	FALSE	FALSE
cg02461114	chr20	61560373	61560374	DIDO1	11083	8929	CGI-N-Shore	FALSE	TRUE	FALSE
cg02462353	chr19	55549799	55549800	GP6	51206	-166	CGI-N-Shelf	TRUE	TRUE	FALSE
cg02466588	chr17	47563766	47563767	NGFR	4804	-8887	Non-CGI	FALSE	FALSE	TRUE
cg02468320	chr12	2404134	2404135	CACNA1C	775	241717	Non-CGI	FALSE	TRUE	FALSE
cg02470008	chr7	2648343	2648344	TTYH3	80727	-23258	CGI	FALSE	TRUE	FALSE
cg02471784	chr12	10826906	10826907	STYK1	55359	-14	CGI	TRUE	FALSE	FALSE
cg02474567	chr15	66548729	66548730	MEGF11	84465	-2653	CGI-S-Shore	FALSE	FALSE	TRUE
cg02478731	chr17	41632391	41632392	ETV4	2118	-8628	Non-CGI	FALSE	FALSE	TRUE
cg02479575	chr19	4769653	4769654	MIR7-3HG	284424	535	CGI	TRUE	TRUE	FALSE
cg02481950	chr16	21665002	21665003	IGSF6	10261	-1014	Non-CGI	TRUE	TRUE	FALSE
cg02482042	chr3	10465412	10465413	MIR885	100126334	-29165	Non-CGI	FALSE	TRUE	FALSE
cg02482603	chr1	174843754	174843755	CACYBP	27101	-124815	Non-CGI	TRUE	TRUE	FALSE
cg02482730	chr17	75473577	75473578	LOC100507351	100507351	-69444	CGI	FALSE	TRUE	FALSE
cg02483931	chr17	34202461	34202462	CCL5	6352	4914	Non-CGI	FALSE	TRUE	FALSE
cg02486096	chr19	57373324	57373325	MIMT1	100073347	21053	CGI-N-Shelf	FALSE	FALSE	TRUE
cg02487233	chr3	107810687	107810688	CD47	961	-751	CGI	TRUE	FALSE	FALSE
cg02488129	chr16	3058364	3058365	CLDN9	9080	-4091	CGI-S-Shelf	FALSE	FALSE	TRUE
cg02493798	chr17	6899577	6899578	ALOX12	239	192	CGI	FALSE	TRUE	FALSE
cg02495569	chr5	172110211	172110212	NEURL1B	54492	41934	CGI	FALSE	TRUE	FALSE
cg02497428	chr16	21665138	21665139	IGSF6	10261	-1150	Non-CGI	TRUE	TRUE	FALSE
cg02500392	chr6	138539372	138539373	PBOV1	59351	253	Non-CGI	TRUE	TRUE	FALSE
cg02502361	chr9	135117928	135117929	NTNG2	84628	80593	CGI	FALSE	TRUE	FALSE
cg02506501	chr1	1228990	1228991	SCNN1D	6339	13173	CGI	FALSE	TRUE	FALSE
cg02508743	chr8	56903623	56903624	SNORD54	26795	82835	Non-CGI	FALSE	TRUE	FALSE
cg02508830	chr7	102576358	102576359	LRRC17	10234	23013	Non-CGI	FALSE	TRUE	FALSE
cg02509730	chr13	100310205	100310206	MIR4306	100422861	14891	CGI-N-Shore	FALSE	TRUE	FALSE
cg02512920	chr10	23460457	23460458	PTF1A	256297	-21001	CGI	FALSE	FALSE	TRUE
cg02518161	chr2	69240400	69240401	ANTXR1	84168	123	CGI	TRUE	FALSE	FALSE
cg02520639	chr8	82021210	82021211	PAG1	55824	3091	CGI-N-Shelf	FALSE	TRUE	FALSE
cg02525722	chr8	10404760	10404761	PRSS55	203074	21703	CGI	FALSE	TRUE	FALSE
cg02525822	chr16	84682731	84682732	KLHL36	79786	599	CGI	FALSE	TRUE	FALSE
cg02528768	chr19	18547358	18547359	ISYNA1	51477	1751	CGI	FALSE	TRUE	FALSE
cg02530022	chr7	96642708	96642709	DLX6-AS1	285987	667	CGI	TRUE	TRUE	FALSE
cg02531506	chr11	134019149	134019150	NCAPD3	23310	75275	CGI	FALSE	TRUE	FALSE
cg02532341	chr3	10399439	10399440	SEC13	6396	-36580	Non-CGI	FALSE	TRUE	FALSE
cg02532700	chr22	37257404	37257405	NCF4	4689	373	Non-CGI	FALSE	TRUE	FALSE
cg02538681	chr10	90611911	90611912	ANKRD22	118932	-178	Non-CGI	TRUE	FALSE	FALSE
cg02538833	chr1	9822207	9822208	CLSTN1	22883	62341	CGI-N-Shore	FALSE	TRUE	FALSE
cg02543462	chr2	113885116	113885117	IL1RN	3557	28178	Non-CGI	TRUE	TRUE	FALSE
cg02544836	chr16	2737220	2737221	KCTD5	54442	4724	CGI-N-Shore	FALSE	TRUE	FALSE
cg02548238	chr5	121413050	121413051	LOX	4015	1003	CGI	TRUE	FALSE	FALSE
cg02549595	chr16	85947219	85947220	IRF8	3394	14444	Non-CGI	FALSE	TRUE	FALSE
cg02551743	chr2	66673428	66673429	MEIS1	4211	10895	CGI	FALSE	TRUE	FALSE
cg02555204	chr5	87984959	87984960	LINC00461	645323	-4338	CGI	FALSE	FALSE	TRUE
cg02555727	chr12	129281546	129281547	SLC15A4	121260	26993	CGI	FALSE	TRUE	FALSE
cg02556928	chr22	37309980	37309981	CSF2RB	1439	304	Non-CGI	FALSE	TRUE	FALSE
cg02557695	chr7	90895083	90895084	FZD1	8321	1299	CGI	TRUE	FALSE	FALSE
cg02557933	chr2	220351040	220351041	GMPPA	29926	-12545	CGI-S-Shore	FALSE	TRUE	FALSE
cg02558476	chr16	2880326	2880327	ZG16B	124220	152	Non-CGI	TRUE	FALSE	FALSE
cg02561912	chr20	50158202	50158203	NFATC2	4773	20964	CGI-N-Shore	FALSE	TRUE	FALSE
cg02563407	chr11	269468	269469	NLRP6	171389	-9100	CGI-S-Shore	FALSE	FALSE	TRUE
cg02570354	chr3	31728749	31728750	STT3B	201595	154257	Non-CGI	FALSE	TRUE	FALSE
cg02571142	chr8	42234803	42234804	DKK4	27121	-128	Non-CGI	TRUE	FALSE	FALSE
cg02571636	chr4	188953906	188953907	ZFP42	132625	36980	CGI-S-Shore	FALSE	FALSE	TRUE
cg02571816	chr19	38747378	38747379	PPP1R14A	94274	-146	CGI-S-Shore	TRUE	FALSE	FALSE
cg02573468	chr15	41224537	41224538	DLL4	54567	3005	CGI-S-Shore	FALSE	TRUE	FALSE
cg02574175	chr8	142160235	142160236	DENND3	22898	21514	CGI	FALSE	TRUE	FALSE
cg02575483	chr6	117826706	117826707	DCBLD1	285761	22885	Non-CGI	FALSE	TRUE	FALSE
cg02578944	chr6	28227392	28227393	NKAPL	222698	293	CGI	TRUE	FALSE	FALSE
cg02582848	chr1	224075899	224075900	TP53BP2	7159	-42224	Non-CGI	FALSE	FALSE	TRUE
cg02584756	chr1	43533796	43533797	FAM183A	440585	-79796	CGI	FALSE	FALSE	TRUE
cg02586249	chr1	45452521	45452522	EIF2B3	8891	-159	CGI-S-Shore	TRUE	FALSE	FALSE
cg02586712	chr15	42249569	42249570	EHD4	30844	15184	Non-CGI	FALSE	TRUE	FALSE
cg02586730	chr11	65639869	65639870	EFEMP2	30008	534	CGI-N-Shore	FALSE	TRUE	FALSE
cg02587606	chr10	77352231	77352232	C10orf11	83938	-190286	CGI-N-Shore	FALSE	FALSE	TRUE
cg02592727	chr19	55574733	55574734	RDH13	112724	6179	CGI-S-Shore	TRUE	TRUE	FALSE
cg02592743	chr6	46889624	46889625	GPR116	221395	33049	Non-CGI	TRUE	TRUE	FALSE
cg02595760	chr6	100066673	100066674	PRDM13	59336	12022	CGI	FALSE	FALSE	TRUE
cg02596153	chr6	108497141	108497142	NR2E1	7101	9925	CGI	FALSE	TRUE	FALSE
cg02596281	chr2	113595614	113595615	IL1B	3553	-1257	Non-CGI	TRUE	FALSE	FALSE
cg02597698	chr22	30662987	30662988	OSM	5008	-157	CGI	TRUE	FALSE	FALSE
cg02599498	chr7	154998107	154998108	INSIG1	3638	-91377	CGI	FALSE	FALSE	TRUE
cg02600085	chr19	18900241	18900242	COMP	1311	1871	CGI	FALSE	TRUE	FALSE
cg02605776	chr1	111507160	111507161	LRIF1	55791	-593	CGI-S-Shore	TRUE	FALSE	FALSE
cg02611419	chr6	39282532	39282533	KCNK17	89822	-294	CGI-S-Shore	TRUE	TRUE	FALSE
cg02611848	chr2	74875387	74875388	M1AP	130951	68	CGI	TRUE	TRUE	FALSE
cg02611934	chr13	88329407	88329408	SLITRK5	26050	4536	CGI-S-Shore	TRUE	TRUE	FALSE
cg02614024	chr15	93652766	93652767	RGMA	56963	-20322	CGI	FALSE	FALSE	TRUE
cg02617757	chr11	68609597	68609598	CPT1A	1374	-197	CGI	TRUE	FALSE	FALSE
cg02621151	chr5	3092997	3092998	C5orf38	153571	340734	CGI	FALSE	FALSE	TRUE
cg02621376	chr1	85461303	85461304	MCOLN2	255231	1491	CGI-N-Shore	FALSE	TRUE	FALSE
cg02622133	chr16	1061920	1061921	SOX8	30812	30111	CGI	FALSE	FALSE	TRUE
cg02625222	chr9	126135169	126135170	CRB2	286204	16720	CGI-S-Shore	FALSE	TRUE	FALSE
cg02625481	chr2	183667124	183667125	FRZB	2487	64372	Non-CGI	FALSE	FALSE	TRUE
cg02626208	chr17	34989377	34989378	MRM1	79922	31351	Non-CGI	FALSE	FALSE	TRUE
cg02626646	chr15	102037293	102037294	PCSK6	5046	-7105	CGI-N-Shore	FALSE	FALSE	TRUE
cg02627991	chr7	74032045	74032046	GTF2I	2969	-39983	Non-CGI	FALSE	FALSE	TRUE
cg02630214	chr3	147098585	147098586	ZIC4	84107	26009	CGI	FALSE	FALSE	TRUE
cg02632362	chr1	236557579	236557580	EDARADD	128178	-99	CGI-N-Shore	TRUE	FALSE	FALSE
cg02637247	chr16	86524562	86524563	FENDRR	400550	17902	CGI-N-Shelf	FALSE	TRUE	FALSE
cg02638458	chr7	155301811	155301812	CNPY1	285888	24726	CGI	FALSE	TRUE	FALSE
cg02640809	chr5	173213710	173213711	CPEB4	80315	-101619	Non-CGI	FALSE	FALSE	TRUE
cg02647929	chr16	4714080	4714081	NUDT16L1	84309	-29612	CGI	FALSE	TRUE	FALSE
cg02648064	chr16	79614389	79614390	MAF	4094	20231	Non-CGI	FALSE	FALSE	TRUE
cg02650266	chr4	147558239	147558240	POU4F2	5458	-1804	CGI	TRUE	FALSE	FALSE
cg02651190	chr21	44818924	44818925	SIK1	150094	28076	CGI-S-Shore	FALSE	FALSE	TRUE
cg02654291	chr9	86572014	86572015	C9orf64	84267	-112	CGI	TRUE	FALSE	FALSE
cg02655630	chr20	44658941	44658942	SLC12A5	57468	8611	CGI	FALSE	TRUE	FALSE
cg02656891	chr1	34642519	34642520	C1orf94	84970	9894	CGI	TRUE	TRUE	FALSE
cg02658690	chr13	110885846	110885847	COL4A1	1282	73648	CGI	FALSE	TRUE	FALSE
cg02658730	chr1	98510182	98510183	MIR2682	100616452	723	CGI-N-Shore	FALSE	TRUE	FALSE
cg02659854	chr13	24824078	24824079	C1QTNF9	338872	-59636	Non-CGI	TRUE	TRUE	FALSE
cg02661034	chr5	1477269	1477270	SLC6A3	6531	-31725	CGI	FALSE	TRUE	FALSE
cg02662828	chr4	48492848	48492849	ZAR1	326340	538	CGI	TRUE	FALSE	FALSE
cg02664787	chr11	132814660	132814661	OPCML	4978	587741	CGI-S-Shore	TRUE	TRUE	FALSE
cg02666820	chr17	700054	700055	GLOD4	51031	-14482	CGI	TRUE	FALSE	FALSE
cg02673417	chr6	137105249	137105250	MAP3K5	4217	8405	Non-CGI	FALSE	TRUE	FALSE
cg02674465	chr7	4786986	4786987	AP5Z1	9907	-28274	CGI-S-Shore	FALSE	TRUE	FALSE
cg02679779	chr5	153417925	153417926	FAM114A2	10827	570	CGI	TRUE	TRUE	FALSE
cg02680566	chr2	19559792	19559793	OSR1	130497	-1419	CGI-S-Shore	TRUE	FALSE	FALSE
cg02681442	chr14	29236008	29236009	FOXG1	2290	-277	CGI-S-Shore	TRUE	FALSE	FALSE
cg02682520	chr5	159895160	159895161	MIR3142	100422938	-6247	CGI-S-Shore	TRUE	FALSE	FALSE
cg02683408	chr17	79487159	79487160	ACTG1	71	-7266	CGI-S-Shore	FALSE	FALSE	TRUE
cg02689863	chr13	95357832	95357833	SOX21	11166	6555	CGI	FALSE	FALSE	TRUE
cg02692938	chr8	76032509	76032510	CRISPLD1	83690	135800	Non-CGI	FALSE	FALSE	TRUE
cg02693157	chr15	87892167	87892168	LINC00052	145978	-227991	Non-CGI	FALSE	FALSE	TRUE
cg02695343	chr12	6881595	6881596	LAG3	3902	-73	CGI-N-Shore	TRUE	FALSE	FALSE
cg02695969	chr19	932813	932814	ARID3A	1820	6775	CGI	FALSE	TRUE	FALSE
cg02698576	chr1	151104750	151104751	SEMA6C	10500	14388	CGI	FALSE	TRUE	FALSE
cg02704570	chr7	157647109	157647110	LOC100506585	100506585	-166	CGI-S-Shore	TRUE	TRUE	FALSE
cg02705918	chr12	114087236	114087237	LHX5	64211	-177358	Non-CGI	FALSE	FALSE	TRUE
cg02707176	chr5	140798758	140798759	PCDHGB7	56099	1543	CGI	TRUE	TRUE	FALSE
cg02709032	chr19	33699683	33699684	LRP3	4037	14083	CGI-S-Shore	FALSE	TRUE	FALSE
cg02712464	chr13	30951156	30951157	LINC00426	100188949	-3119	Non-CGI	FALSE	FALSE	TRUE
cg02713960	chr16	746048	746049	WDR24	84219	-5647	CGI-S-Shore	TRUE	TRUE	FALSE
cg02715546	chr15	55881162	55881163	PYGO1	26108	-111	CGI	TRUE	FALSE	FALSE
cg02716776	chr19	3178413	3178414	S1PR4	8698	-321	CGI	TRUE	FALSE	FALSE
cg02717454	chr16	3928799	3928800	CREBBP	1387	1320	CGI-N-Shore	FALSE	TRUE	FALSE
cg02718825	chr20	55202842	55202843	TFAP2C	7022	-1514	CGI	TRUE	FALSE	FALSE
cg02720566	chr19	18230196	18230197	IL12RB1	3594	-20569	CGI-S-Shore	FALSE	TRUE	FALSE
cg02721602	chr6	99755198	99755199	FAXC	84553	42331	Non-CGI	FALSE	TRUE	FALSE
cg02722188	chr4	55099058	55099059	GSX2	170825	132809	CGI-S-Shore	FALSE	TRUE	FALSE
cg02724909	chr5	149625104	149625105	CAMK2A	815	44297	Non-CGI	FALSE	TRUE	FALSE
cg02726291	chr3	128779596	128779597	GP9	2815	-47	CGI-N-Shore	TRUE	FALSE	FALSE
cg02727363	chr16	70284928	70284929	EXOSC6	118460	903	CGI-N-Shore	TRUE	FALSE	FALSE
cg02728595	chr3	196255632	196255633	C3orf43	255798	-13394	CGI	FALSE	FALSE	TRUE
cg02734358	chr4	90227074	90227075	GPRIN3	285513	2085	CGI-N-Shore	FALSE	TRUE	FALSE
cg02734505	chr12	54763081	54763082	GPR84	53831	-4810	CGI	FALSE	TRUE	FALSE
cg02734527	chr16	4303413	4303414	LOC100507501	100507501	375	CGI-N-Shore	FALSE	TRUE	FALSE
cg02735762	chr9	135280262	135280263	TTF1	7270	1974	CGI-N-Shore	FALSE	TRUE	FALSE
cg02738156	chr2	6910588	6910589	LINC00487	400941	-145	CGI-N-Shelf	TRUE	FALSE	FALSE
cg02738617	chr2	58023996	58023997	VRK2	7444	-110788	Non-CGI	FALSE	FALSE	TRUE
cg02739346	chr2	119600519	119600520	EN1	2019	5238	CGI	FALSE	TRUE	FALSE
cg02741882	chr16	29888096	29888097	LOC440356	440356	13091	CGI	FALSE	TRUE	FALSE
cg02742418	chr12	129280388	129280389	SLC15A4	121260	28151	CGI	FALSE	TRUE	FALSE
cg02742555	chr11	15200692	15200693	INSC	387755	66721	Non-CGI	FALSE	TRUE	FALSE
cg02743878	chr2	169937094	169937095	DHRS9	10170	15794	Non-CGI	TRUE	TRUE	FALSE
cg02744046	chr15	58782685	58782686	LIPC	3990	79909	CGI	FALSE	TRUE	FALSE
cg02744249	chr20	57582918	57582919	CTSZ	1522	-608	CGI-S-Shore	TRUE	FALSE	FALSE
cg02749735	chr3	185912253	185912254	ETV5	2119	-85351	CGI	FALSE	TRUE	FALSE
cg02750743	chr12	117477837	117477838	TESC	54997	59412	CGI	FALSE	TRUE	FALSE
cg02754470	chr15	59157857	59157858	SLTM	79811	67993	CGI-S-Shore	FALSE	FALSE	TRUE
cg02756056	chr6	32813582	32813583	PSMB8	5696	-869	CGI-S-Shore	TRUE	TRUE	FALSE
cg02757667	chr2	179149472	179149473	OSBPL6	114880	90263	Non-CGI	FALSE	TRUE	FALSE
cg02757970	chr2	25427350	25427351	POMC	5443	-35790	CGI	FALSE	FALSE	TRUE
cg02758247	chr18	59222050	59222051	CDH20	28316	221061	CGI-S-Shore	FALSE	TRUE	FALSE
cg02759846	chr19	51227943	51227944	CLEC11A	6320	1337	CGI	FALSE	TRUE	FALSE
cg02760495	chr3	139678075	139678076	CLSTN2	64084	24047	Non-CGI	FALSE	TRUE	FALSE
cg02762115	chr11	640446	640447	DRD4	1815	3140	CGI	FALSE	TRUE	FALSE
cg02767633	chr5	2253242	2253243	IRX4	50805	-370361	CGI	FALSE	FALSE	TRUE
cg02768721	chr7	158221370	158221371	MIR595	693180	104133	CGI	FALSE	TRUE	FALSE
cg02770983	chr11	31822341	31822342	DKFZp686K1684	440034	-15771	CGI-S-Shore	FALSE	TRUE	FALSE
cg02771142	chr11	31819678	31819679	DKFZp686K1684	440034	-18434	CGI	FALSE	TRUE	FALSE
cg02771336	chr8	131289180	131289181	ASAP1-IT1	29065	19597	Non-CGI	FALSE	TRUE	FALSE
cg02771362	chr9	130541859	130541860	SH2D3C	10044	-810	Non-CGI	TRUE	FALSE	FALSE
cg02773086	chr2	177027440	177027441	HOXD3	3232	-1363	CGI	TRUE	FALSE	FALSE
cg02773588	chr3	48698519	48698520	CELSR3	1951	11460	CGI	TRUE	TRUE	FALSE
cg02774015	chr1	15735880	15735881	EFHD2	79180	-509	CGI-N-Shore	TRUE	FALSE	FALSE
cg02775243	chr10	102831287	102831288	KAZALD1	81621	10287	CGI-S-Shelf	FALSE	FALSE	TRUE
cg02775804	chr2	120974080	120974081	TMEM185B	79134	6902	CGI	FALSE	FALSE	TRUE
cg02776659	chr21	47717406	47717407	YBEY	54059	11138	CGI	FALSE	TRUE	FALSE
cg02778243	chr2	239563383	239563384	LOC151171	151171	-99242	Non-CGI	FALSE	FALSE	TRUE
cg02779913	chr17	40088680	40088681	TTC25	83538	1791	CGI-S-Shore	FALSE	TRUE	FALSE
cg02780988	chr17	39646994	39646995	KRT36	8689	-877	CGI-S-Shelf	TRUE	FALSE	FALSE
cg02781618	chr4	42153695	42153696	BEND4	389206	1198	CGI	TRUE	TRUE	FALSE
cg02782426	chr3	40428986	40428987	ENTPD3	956	312	CGI	FALSE	TRUE	FALSE
cg02782634	chr17	57916643	57916644	MIR21	406991	-1982	Non-CGI	TRUE	TRUE	FALSE
cg02785604	chr2	131676136	131676137	ARHGEF4	50649	3349	CGI-S-Shore	FALSE	TRUE	FALSE
cg02786019	chr7	142582859	142582860	TRPV6	55503	629	Non-CGI	FALSE	TRUE	FALSE
cg02787320	chr17	62103369	62103370	ICAM2	3384	-5374	Non-CGI	FALSE	FALSE	TRUE
cg02789515	chr17	25620677	25620678	MIR4522	100616277	343	CGI-N-Shore	TRUE	FALSE	FALSE
cg02790372	chr11	128359499	128359500	ETS1	2113	97952	Non-CGI	FALSE	TRUE	FALSE
cg02792780	chr3	52529341	52529342	STAB1	23166	-13	Non-CGI	TRUE	FALSE	FALSE
cg02794695	chr8	134072611	134072612	SLA	6503	42697	Non-CGI	TRUE	TRUE	FALSE
cg02795076	chr12	50505329	50505330	COX14	84987	-569	CGI	TRUE	FALSE	FALSE
cg02795981	chr10	81045119	81045120	PPIF	10105	-62099	Non-CGI	FALSE	TRUE	FALSE
cg02796545	chr13	33590466	33590467	KL	9365	264	CGI	TRUE	TRUE	FALSE
cg02796939	chr17	80545125	80545126	WDR45B	56270	61284	CGI	FALSE	TRUE	FALSE
cg02797195	chr21	43185674	43185675	RIPK4	54101	1573	CGI-S-Shore	FALSE	TRUE	FALSE
cg02797271	chr14	105532159	105532160	GPR132	29933	-404	Non-CGI	TRUE	FALSE	FALSE
cg02801359	chr20	58508922	58508923	FAM217B	63939	102	CGI	TRUE	TRUE	FALSE
cg02806739	chr17	80273242	80273243	CD7	924	2236	CGI-S-Shore	FALSE	TRUE	FALSE
cg02807446	chr10	106682909	106682910	SORCS3	22986	282049	Non-CGI	FALSE	TRUE	FALSE
cg02810692	chr3	54962954	54962955	LRTM1	57408	-881	Non-CGI	TRUE	TRUE	FALSE
cg02814054	chr19	18234911	18234912	IL12RB1	3594	-25284	CGI	FALSE	TRUE	FALSE
cg02815516	chr19	11306319	11306320	KANK2	25959	2146	CGI-S-Shore	TRUE	TRUE	FALSE
cg02821693	chr2	218072936	218072937	TNP1	7141	-348153	Non-CGI	FALSE	FALSE	TRUE
cg02821871	chr19	49133598	49133599	DBP	1628	7039	CGI	FALSE	TRUE	FALSE
cg02823783	chr12	124246919	124246920	DNAH10	196385	-121	CGI	TRUE	FALSE	FALSE
cg02825887	chr9	34591041	34591042	CNTFR	1271	-902	CGI	TRUE	FALSE	FALSE
cg02827029	chr12	121890907	121890908	RNF34	80196	53004	CGI	FALSE	TRUE	FALSE
cg02830023	chr6	15575773	15575774	DTNBP1	84062	87514	Non-CGI	FALSE	TRUE	FALSE
cg02831900	chr4	184320640	184320641	CDKN2AIP	55602	-45147	CGI-S-Shore	FALSE	FALSE	TRUE
cg02834449	chr16	85786110	85786111	C16orf74	404550	-1420	CGI-S-Shore	TRUE	FALSE	FALSE
cg02835462	chr1	46391567	46391568	MAST2	23139	122281	CGI-N-Shore	FALSE	TRUE	FALSE
cg02836864	chr2	113388910	113388911	FLJ42351	400999	12845	Non-CGI	FALSE	FALSE	TRUE
cg02837536	chr1	4771682	4771683	AJAP1	55966	56576	CGI	FALSE	TRUE	FALSE
cg02838118	chr1	111506021	111506022	LRIF1	55791	543	CGI	FALSE	TRUE	FALSE
cg02843500	chr16	31501866	31501867	SLC5A2	6524	7426	CGI-S-Shore	TRUE	TRUE	FALSE
cg02844611	chr3	183273894	183273895	KLHL6	89857	-394	Non-CGI	TRUE	FALSE	FALSE
cg02845204	chr11	71259439	71259440	KRTAP5-9	3846	-25	Non-CGI	TRUE	FALSE	FALSE
cg02846841	chr6	28945341	28945342	ZNF311	282890	27750	CGI	FALSE	FALSE	TRUE
cg02849401	chr11	19668740	19668741	LOC100126784	100126784	67476	Non-CGI	FALSE	TRUE	FALSE
cg02852025	chr7	50348174	50348175	IKZF1	10320	3795	CGI-S-Shelf	TRUE	TRUE	FALSE
cg02852407	chr1	208085455	208085456	CD34	947	-771	CGI-S-Shore	TRUE	FALSE	FALSE
cg02853387	chr11	117484904	117484905	DSCAML1	57453	203334	Non-CGI	FALSE	TRUE	FALSE
cg02853616	chr4	94755787	94755788	ATOH1	474	5708	CGI	FALSE	FALSE	TRUE
cg02853948	chr6	55105271	55105272	HCRTR2	3062	66199	Non-CGI	TRUE	TRUE	FALSE
cg02855045	chr3	72777245	72777246	SHQ1	55164	120351	Non-CGI	FALSE	FALSE	TRUE
cg02855203	chr11	62569427	62569428	NXF1	10482	3535	CGI-N-Shelf	FALSE	TRUE	FALSE
cg02855981	chr2	26204237	26204238	KIF3C	3797	1204	CGI	TRUE	FALSE	FALSE
cg02856716	chr1	18993307	18993308	PAX7	5081	35806	Non-CGI	FALSE	TRUE	FALSE
cg02858118	chr3	48694018	48694019	MIR4793	100616112	-12304	CGI	FALSE	TRUE	FALSE
cg02859421	chr19	3465071	3465072	C19orf77	284422	15467	CGI	FALSE	TRUE	FALSE
cg02861056	chr2	68592345	68592346	PLEK	5341	22	Non-CGI	TRUE	FALSE	FALSE
cg02861504	chr1	207144367	207144368	FCAMR	83953	-396	Non-CGI	TRUE	FALSE	FALSE
cg02863169	chr2	45173548	45173549	SIX3	6496	4510	CGI-S-Shore	FALSE	FALSE	TRUE
cg02863339	chr12	110149510	110149511	FAM222A	84915	-2675	CGI-N-Shore	FALSE	FALSE	TRUE
cg02872373	chr7	129418058	129418059	MIR183	406959	-3203	CGI-N-Shore	FALSE	FALSE	TRUE
cg02872868	chr4	186565192	186565193	PDLIM3	27295	-108479	Non-CGI	FALSE	TRUE	FALSE
cg02873391	chr11	130470658	130470659	ADAMTS15	170689	151788	Non-CGI	FALSE	FALSE	TRUE
cg02874908	chr11	67205113	67205114	PTPRCAP	5790	38	CGI-S-Shore	TRUE	FALSE	FALSE
cg02876276	chr17	77834299	77834300	CBX4	8535	-21085	CGI	FALSE	FALSE	TRUE
cg02889869	chr10	33384895	33384896	ITGB1	3688	-137601	Non-CGI	FALSE	FALSE	TRUE
cg02889973	chr1	234977572	234977573	LOC100506810	100506810	117782	Non-CGI	FALSE	FALSE	TRUE
cg02890194	chr7	156791845	156791846	MNX1	3110	11500	CGI-N-Shore	FALSE	TRUE	FALSE
cg02891686	chr4	24801425	24801426	SOD3	6649	4339	CGI	TRUE	TRUE	FALSE
cg02900766	chr15	58357319	58357320	AQP9	366	-73074	CGI	FALSE	TRUE	FALSE
cg02904554	chr6	3404079	3404080	SLC22A23	63027	52712	Non-CGI	FALSE	TRUE	FALSE
cg02908912	chr10	72578346	72578347	SGPL1	8879	2641	CGI-S-Shelf	FALSE	TRUE	FALSE
cg02909097	chr17	2843206	2843207	OR1D5	8386	123693	CGI	FALSE	TRUE	FALSE
cg02909694	chr6	31126832	31126833	TCF19	6941	528	CGI	TRUE	TRUE	FALSE
cg02910054	chr16	12241554	12241555	SNX29	92017	170951	Non-CGI	FALSE	TRUE	FALSE
cg02913568	chr3	184444946	184444947	MAGEF1	64110	-15109	Non-CGI	FALSE	FALSE	TRUE
cg02914427	chr16	29674184	29674185	SPN	6693	-114	CGI-N-Shore	TRUE	TRUE	FALSE
cg02916962	chr2	157180144	157180145	NR4A2	4929	9141	CGI-S-Shore	FALSE	FALSE	TRUE
cg02919116	chr1	214152742	214152743	PROX1	5629	-8542	CGI	FALSE	FALSE	TRUE
cg02920600	chr7	137367341	137367342	DGKI	9162	164266	Non-CGI	FALSE	TRUE	FALSE
cg02925367	chr6	32116905	32116906	PRRT1	80863	3953	CGI	FALSE	TRUE	FALSE
cg02927327	chr6	35265759	35265760	DEF6	50619	163	CGI-S-Shore	FALSE	TRUE	FALSE
cg02929855	chr12	1922067	1922068	LRTM2	654429	-7364	Non-CGI	TRUE	TRUE	FALSE
cg02933639	chr4	8207325	8207326	SH3TC1	54436	6264	CGI-S-Shore	FALSE	TRUE	FALSE
cg02935132	chr2	233924789	233924790	INPP5D	3635	-245	CGI-N-Shore	TRUE	FALSE	FALSE
cg02935351	chr12	1748816	1748817	MIR3649	100500816	20728	CGI	FALSE	TRUE	FALSE
cg02939918	chr6	138726163	138726164	HEBP2	23593	826	CGI	FALSE	TRUE	FALSE
cg02940164	chr11	3829971	3829972	NUP98	4928	-10948	CGI-S-Shore	FALSE	TRUE	FALSE
cg02940165	chr19	57149563	57149564	SMIM17	147670	-4962	Non-CGI	FALSE	FALSE	TRUE
cg02941741	chr2	233793921	233793922	C2orf82	389084	58926	CGI-S-Shore	TRUE	TRUE	FALSE
cg02943456	chr8	33866594	33866595	DUSP26	78986	-409154	Non-CGI	FALSE	FALSE	TRUE
cg02947253	chr1	112046700	112046701	C1orf162	128346	30095	Non-CGI	TRUE	TRUE	FALSE
cg02947450	chr10	22766861	22766862	LOC100499489	100499489	-40002	CGI	FALSE	FALSE	TRUE
cg02947862	chr10	129979375	129979376	MKI67	4288	-54906	Non-CGI	TRUE	FALSE	FALSE
cg02949186	chr21	42733776	42733777	MX2	4600	-172	Non-CGI	TRUE	FALSE	FALSE
cg02949991	chr22	29977262	29977263	NIPSNAP1	8508	62	CGI	TRUE	FALSE	FALSE
cg02956699	chr7	157462264	157462265	MIR153-2	406945	-95149	CGI	FALSE	TRUE	FALSE
cg02957197	chr1	26449233	26449234	PDIK1L	149420	11576	Non-CGI	FALSE	TRUE	FALSE
cg02958014	chr12	127206602	127206603	LOC100507206	100507206	-14949	Non-CGI	FALSE	FALSE	TRUE
cg02958327	chr16	745663	745664	WDR24	84219	-5262	CGI	TRUE	TRUE	FALSE
cg02960125	chr1	182025752	182025753	ZNF648	127665	5093	CGI	TRUE	TRUE	FALSE
cg02961707	chr19	7927974	7927975	FLJ22184	80164	11350	CGI	FALSE	TRUE	FALSE
cg02963641	chr15	41925916	41925917	MGA	23269	12151	Non-CGI	FALSE	TRUE	FALSE
cg02966332	chr20	62369605	62369606	SLC2A4RG	56731	-1604	CGI	TRUE	TRUE	FALSE
cg02971546	chr4	8200774	8200775	SH3TC1	54436	-284	CGI-N-Shore	TRUE	FALSE	FALSE
cg02973693	chr16	73085092	73085093	ZFHX3	463	7440	CGI-S-Shelf	FALSE	TRUE	FALSE
cg02974085	chr1	222990921	222990922	DISP1	84976	2489	CGI-S-Shelf	FALSE	TRUE	FALSE
cg02975463	chr2	45178953	45178954	SIX3	6496	9915	CGI-S-Shore	FALSE	FALSE	TRUE
cg02976843	chr17	2843257	2843258	OR1D5	8386	123642	CGI	FALSE	TRUE	FALSE
cg02978168	chr18	76695123	76695124	SALL3	27164	-45150	CGI	FALSE	FALSE	TRUE
cg02978737	chr22	37216067	37216068	PVALB	5816	-549	CGI-S-Shelf	TRUE	FALSE	FALSE
cg02979839	chr5	176957063	176957064	DDX41	51428	-13095	Non-CGI	FALSE	TRUE	FALSE
cg02980023	chr3	52558373	52558374	NT5DC2	64943	10718	CGI-N-Shore	FALSE	TRUE	FALSE
cg02980499	chr10	98031964	98031965	BLNK	29760	-630	Non-CGI	TRUE	FALSE	FALSE
cg02981003	chr10	134917911	134917912	GPR123	84435	33477	CGI-S-Shore	FALSE	TRUE	FALSE
cg02981928	chr1	23495492	23495493	LUZP1	7798	8807	CGI-S-Shore	TRUE	TRUE	FALSE
cg02983424	chr15	97491433	97491434	SPATA8	145946	164753	CGI	FALSE	FALSE	TRUE
cg02983911	chr20	36932397	36932398	BPI	671	-153	Non-CGI	TRUE	FALSE	FALSE
cg02985250	chr10	80714322	80714323	ZMIZ1-AS1	283050	114212	Non-CGI	FALSE	TRUE	FALSE
cg02985539	chr7	78386131	78386132	RPL13AP17	399670	409571	Non-CGI	FALSE	TRUE	FALSE
cg02986451	chr18	59159403	59159404	CDH20	28316	158414	Non-CGI	FALSE	TRUE	FALSE
cg02989244	chr10	28657270	28657271	MPP7	143098	-65274	Non-CGI	FALSE	FALSE	TRUE
cg02993606	chr19	38803369	38803370	YIF1B	90522	3235	CGI-N-Shelf	FALSE	TRUE	FALSE
cg02996471	chr19	3178512	3178513	S1PR4	8698	-222	CGI	TRUE	FALSE	FALSE
cg03002688	chr4	26152723	26152724	RBPJ	3516	-168607	Non-CGI	FALSE	FALSE	TRUE
cg03003335	chr1	1229351	1229352	SCNN1D	6339	13534	CGI	FALSE	TRUE	FALSE
cg03006477	chr6	74432658	74432659	CD109	135228	27149	Non-CGI	FALSE	TRUE	FALSE
cg03013329	chr18	22006989	22006990	IMPACT	55364	379	CGI	TRUE	TRUE	FALSE
cg03020208	chr12	50354962	50354963	AQP5	362	-315	CGI	TRUE	FALSE	FALSE
cg03020503	chr16	87577655	87577656	ZCCHC14	23174	-52194	CGI	FALSE	FALSE	TRUE
cg03020951	chr6	34203887	34203888	HMGA1	3159	-688	CGI	TRUE	FALSE	FALSE
cg03021496	chr6	71997462	71997463	OGFRL1	79627	-1013	CGI-N-Shore	TRUE	FALSE	FALSE
cg03022510	chr2	192476634	192476635	NABP1	64859	-66162	Non-CGI	FALSE	FALSE	TRUE
cg03023089	chr22	36806580	36806581	MYH9	4627	-22516	CGI	FALSE	FALSE	TRUE
cg03024212	chr19	46935291	46935292	CCDC8	83987	-18371	CGI-S-Shelf	FALSE	FALSE	TRUE
cg03024720	chr8	9765601	9765602	MIR124-1	406907	-4618	CGI	FALSE	FALSE	TRUE
cg03025830	chr8	21905599	21905600	FGF17	8822	5170	CGI	FALSE	TRUE	FALSE
cg03026306	chr18	21718767	21718768	CABYR	26256	-186	CGI	TRUE	FALSE	FALSE
cg03026373	chr17	36715787	36715788	SRCIN1	80725	46394	CGI	TRUE	TRUE	FALSE
cg03027227	chr2	80221468	80221469	LRRTM1	347730	310017	Non-CGI	FALSE	TRUE	FALSE
cg03032552	chr4	2788986	2788987	SH3BP2	6452	-5762	Non-CGI	FALSE	FALSE	TRUE
cg03037761	chr11	86663341	86663342	FZD4	8322	3097	CGI-N-Shelf	FALSE	TRUE	FALSE
cg03041658	chr7	94543948	94543949	PPP1R9A	55607	6998	Non-CGI	FALSE	TRUE	FALSE
cg03041920	chr13	100310311	100310312	MIR4306	100422861	14997	CGI	FALSE	TRUE	FALSE
cg03043127	chr5	76010658	76010659	F2R	2149	-1208	CGI-S-Shore	TRUE	FALSE	FALSE
cg03044513	chr11	116706153	116706154	APOA1	335	2183	CGI-N-Shore	FALSE	FALSE	TRUE
cg03048654	chr10	118893138	118893139	VAX1	11023	4672	CGI	FALSE	TRUE	FALSE
cg03049303	chr10	103816154	103816155	C10orf76	79591	-221	CGI	TRUE	FALSE	FALSE
cg03051384	chr15	65197883	65197884	ANKDD1A	348094	-6216	CGI	FALSE	FALSE	TRUE
cg03055520	chr11	121460793	121460794	SORL1	6653	137880	Non-CGI	TRUE	TRUE	FALSE
cg03058346	chr1	91275170	91275171	BARHL2	343472	-92375	Non-CGI	FALSE	FALSE	TRUE
cg03059073	chr7	150130708	150130709	LOC285972	285972	-32	Non-CGI	TRUE	FALSE	FALSE
cg03061916	chr10	94829090	94829091	CYP26A1	1592	-4140	CGI-S-Shore	FALSE	FALSE	TRUE
cg03062944	chr10	6183455	6183456	PFKFB3	5209	-3386	CGI	FALSE	FALSE	TRUE
cg03063658	chr2	109949132	109949133	MIR4266	100423027	-19050	CGI-N-Shelf	FALSE	TRUE	FALSE
cg03065175	chr4	155661758	155661759	LRAT	9227	-3392	CGI-N-Shore	FALSE	TRUE	FALSE
cg03065612	chr16	3627730	3627731	NLRC3	197358	-337	Non-CGI	TRUE	FALSE	FALSE
cg03066323	chr7	99970779	99970780	PILRA	29992	-287	Non-CGI	TRUE	FALSE	FALSE
cg03068030	chr22	46688823	46688824	CN5H6.4	150384	3732	CGI-S-Shelf	FALSE	TRUE	FALSE
cg03069736	chr17	72542117	72542118	CD300C	10871	163	Non-CGI	TRUE	FALSE	FALSE
cg03071134	chr17	34626096	34626097	CCL3L1	6349	-365	Non-CGI	TRUE	TRUE	FALSE
cg03074925	chr6	10425625	10425626	TFAP2A	7020	-5827	CGI	FALSE	FALSE	TRUE
cg03078551	chr17	41656298	41656299	ETV4	2118	-32535	Non-CGI	FALSE	FALSE	TRUE
cg03081478	chr7	2773127	2773128	AMZ1	155185	53963	CGI-S-Shore	FALSE	TRUE	FALSE
cg03082523	chr1	3155965	3155966	MIR4251	100422968	111425	CGI-S-Shore	FALSE	TRUE	FALSE
cg03082813	chr3	47554177	47554178	ELP6	54859	1020	CGI-N-Shore	FALSE	TRUE	FALSE
cg03085785	chr7	27247651	27247652	HOTTIP	100316868	7610	CGI-S-Shore	FALSE	FALSE	TRUE
cg03087610	chr10	71892362	71892363	AIFM2	84883	326	CGI	FALSE	TRUE	FALSE
cg03087897	chr19	14550846	14550847	PKN1	5585	6679	CGI-N-Shore	TRUE	TRUE	FALSE
cg03088990	chr20	44540278	44540279	PLTP	5360	723	CGI	TRUE	TRUE	FALSE
cg03097190	chr22	32854361	32854362	BPIFC	254240	6070	Non-CGI	TRUE	TRUE	FALSE
cg03106245	chr11	47399980	47399981	SPI1	6688	145	Non-CGI	TRUE	TRUE	FALSE
cg03107235	chr13	26586713	26586714	SHISA2	387914	38483	CGI	FALSE	TRUE	FALSE
cg03108344	chr6	150326762	150326763	RAET1K	646024	-481	CGI-S-Shore	TRUE	FALSE	FALSE
cg03108347	chr11	70961784	70961785	SHANK2	22941	-25941	CGI-N-Shore	FALSE	FALSE	TRUE
cg03114584	chr4	1534311	1534312	CRIPAK	285464	148970	CGI-N-Shore	FALSE	FALSE	TRUE
cg03115562	chr11	131826036	131826037	NTM	50863	585664	Non-CGI	FALSE	TRUE	FALSE
cg03119829	chr1	64170964	64170965	ROR1	4919	-68724	Non-CGI	FALSE	FALSE	TRUE
cg03124636	chr6	30711426	30711427	IER3	8870	899	CGI-S-Shore	TRUE	TRUE	FALSE
cg03124769	chr7	138793831	138793832	ZC3HAV1	56829	632	CGI	TRUE	FALSE	FALSE
cg03126694	chr13	49001104	49001105	LPAR6	10161	17734	Non-CGI	TRUE	TRUE	FALSE
cg03127244	chr6	33245638	33245639	B3GALT4	8705	720	CGI	TRUE	FALSE	FALSE
cg03130910	chr1	234908226	234908227	LOC100506810	100506810	48436	CGI-N-Shore	FALSE	FALSE	TRUE
cg03131767	chr12	123446272	123446273	OGFOD2	79676	-13080	CGI-S-Shore	TRUE	TRUE	FALSE
cg03140412	chr11	415111	415112	SIGIRR	59307	2284	CGI-N-Shore	TRUE	TRUE	FALSE
cg03140624	chr1	235931377	235931378	MIR1537	100302139	84981	Non-CGI	FALSE	TRUE	FALSE
cg03143886	chr18	22006473	22006474	IMPACT	55364	-134	CGI	TRUE	FALSE	FALSE
cg03146413	chr7	156296744	156296745	LINC00244	64433	-36439	CGI-N-Shore	FALSE	FALSE	TRUE
cg03160135	chr6	117586918	117586919	VGLL2	245806	196	CGI	TRUE	FALSE	FALSE
cg03162359	chr12	45610751	45610752	PLEKHA8P1	51054	-961	CGI	TRUE	TRUE	FALSE
cg03163545	chr16	1593415	1593416	TMEM204	79652	14672	CGI-S-Shore	FALSE	TRUE	FALSE
cg03165176	chr19	1456886	1456887	APC2	10297	6737	CGI	TRUE	TRUE	FALSE
cg03169557	chr16	89598950	89598951	SPG7	6687	24144	CGI	FALSE	TRUE	FALSE
cg03170036	chr2	202814433	202814434	FZD7	8324	-84875	CGI	FALSE	FALSE	TRUE
cg03171419	chr8	37700802	37700803	BRF2	55290	6627	CGI-S-Shore	FALSE	TRUE	FALSE
cg03171795	chr3	70882921	70882922	MIR1284	100302112	708317	Non-CGI	FALSE	FALSE	TRUE
cg03176550	chr16	28996329	28996330	LAT	27040	802	Non-CGI	TRUE	TRUE	FALSE
cg03180322	chr15	81604544	81604545	STARD5	80765	11978	Non-CGI	FALSE	TRUE	FALSE
cg03187073	chr6	4890079	4890080	RPP40	10799	114190	CGI-N-Shore	TRUE	TRUE	FALSE
cg03187795	chr16	23535137	23535138	GGA2	23062	-13321	Non-CGI	FALSE	TRUE	FALSE
cg03188064	chr12	122096667	122096668	MORN3	283385	13868	Non-CGI	FALSE	TRUE	FALSE
cg03189210	chr6	33245474	33245475	B3GALT4	8705	556	CGI	TRUE	FALSE	FALSE
cg03190661	chr17	76126702	76126703	TMC8	147138	-155	CGI-S-Shore	TRUE	TRUE	FALSE
cg03190891	chr10	97201172	97201173	SORBS1	10580	119997	Non-CGI	TRUE	TRUE	FALSE
cg03194064	chr16	57509786	57509787	DOK4	55715	10597	CGI-N-Shelf	FALSE	TRUE	FALSE
cg03195795	chr7	4786768	4786769	AP5Z1	9907	-28492	CGI-S-Shore	FALSE	TRUE	FALSE
cg03198066	chr2	159311068	159311069	CCDC148	130940	2195	CGI-N-Shelf	FALSE	TRUE	FALSE
cg03199926	chr20	60860733	60860734	ADRM1	11047	-17292	CGI-N-Shore	FALSE	TRUE	FALSE
cg03202693	chr13	113637903	113637904	MCF2L-AS1	100289410	-14950	CGI-S-Shore	FALSE	TRUE	FALSE
cg03211447	chr13	111933653	111933654	TEX29	121793	-39360	CGI-N-Shore	TRUE	TRUE	FALSE
cg03211593	chr11	44731693	44731694	TSPAN18	90139	-54281	Non-CGI	FALSE	FALSE	TRUE
cg03214217	chr7	140994128	140994129	TMEM178B	100507421	220095	Non-CGI	FALSE	TRUE	FALSE
cg03214715	chr12	57873176	57873177	MARS	4141	-7899	CGI-S-Shelf	TRUE	TRUE	FALSE
cg03217587	chr2	239403003	239403004	LOC151171	151171	61135	CGI	FALSE	FALSE	TRUE
cg03219968	chr1	217310383	217310384	ESRRG	2104	712	CGI	FALSE	TRUE	FALSE
cg03222929	chr2	10688100	10688101	ODC1	4953	-99646	CGI-S-Shore	FALSE	FALSE	TRUE
cg03223076	chr3	48698558	48698559	CELSR3	1951	11421	CGI	TRUE	TRUE	FALSE
cg03225208	chr9	124412094	124412095	DAB2IP	153090	82694	CGI-N-Shore	FALSE	TRUE	FALSE
cg03228449	chr2	216299545	216299546	FN1	2335	1244	CGI-N-Shore	FALSE	TRUE	FALSE
cg03231447	chr11	2295191	2295192	ASCL2	430	-3008	CGI	FALSE	FALSE	TRUE
cg03232056	chr7	157461310	157461311	MIR153-2	406945	-94195	CGI	FALSE	TRUE	FALSE
cg03237606	chr10	63212265	63212266	TMEM26	219623	941	CGI	TRUE	TRUE	FALSE
cg03238090	chr2	8666220	8666221	ID2	3398	-155891	Non-CGI	FALSE	FALSE	TRUE
cg03243506	chr20	2517231	2517232	TMC2	117532	-20	Non-CGI	TRUE	FALSE	FALSE
cg03247944	chr12	3472883	3472884	PRMT8	56341	-17630	CGI-N-Shelf	FALSE	FALSE	TRUE
cg03249630	chr10	90611782	90611783	ANKRD22	118932	-49	Non-CGI	TRUE	FALSE	FALSE
cg03252770	chr4	154354354	154354355	KIAA0922	23240	-33142	Non-CGI	FALSE	FALSE	TRUE
cg03252786	chr11	125106056	125106057	PKNOX2	63876	71496	Non-CGI	FALSE	TRUE	FALSE
cg03254875	chr10	180361	180362	ZMYND11	10771	-42	CGI	TRUE	FALSE	FALSE
cg03255417	chr13	49357650	49357651	CYSLTR2	57105	76696	Non-CGI	FALSE	FALSE	TRUE
cg03256955	chr3	30649017	30649018	TGFBR2	7048	1022	CGI-S-Shore	FALSE	TRUE	FALSE
cg03258927	chr1	114524590	114524591	OLFML3	56944	2559	Non-CGI	FALSE	TRUE	FALSE
cg03263514	chr22	19711036	19711037	SEPT5-GP1BB	100526833	9048	CGI	TRUE	TRUE	FALSE
cg03263730	chr1	7841722	7841723	PER3	8863	-2656	CGI-N-Shore	FALSE	FALSE	TRUE
cg03270204	chr6	30851638	30851639	DDR1	780	943	CGI-N-Shore	TRUE	TRUE	FALSE
cg03271080	chr2	86255119	86255120	LOC90784	90784	-4127	CGI-N-Shore	FALSE	TRUE	FALSE
cg03271293	chr2	6920924	6920925	LINC00487	400941	-10481	Non-CGI	FALSE	FALSE	TRUE
cg03273700	chr6	117997374	117997375	NUS1	116150	756	CGI	FALSE	TRUE	FALSE
cg03277496	chr22	36602341	36602342	APOL4	80832	-1461	Non-CGI	TRUE	FALSE	FALSE
cg03278514	chr15	70779346	70779347	UACA	55075	276502	Non-CGI	FALSE	FALSE	TRUE
cg03283235	chr12	130354828	130354829	TMEM132D	121256	33382	CGI-N-Shelf	FALSE	TRUE	FALSE
cg03284879	chr3	193894498	193894499	HES1	3280	40566	Non-CGI	FALSE	FALSE	TRUE
cg03286774	chr16	89590357	89590358	SPG7	6687	15551	CGI	FALSE	TRUE	FALSE
cg03290131	chr10	112263831	112263832	DUSP5	1847	6205	Non-CGI	FALSE	TRUE	FALSE
cg03290522	chr15	80634248	80634249	LOC283688	283688	-100	Non-CGI	TRUE	FALSE	FALSE
cg03290977	chr4	15402686	15402687	C1QTNF7	114905	61125	Non-CGI	FALSE	TRUE	FALSE
cg03292675	chr8	21912864	21912865	EPB49	2039	1782	CGI-N-Shore	FALSE	TRUE	FALSE
cg03292743	chr2	74642838	74642839	C2orf81	388963	2004	CGI	TRUE	TRUE	FALSE
cg03301498	chr19	39889222	39889223	MED29	55588	7258	CGI-N-Shelf	FALSE	TRUE	FALSE
cg03302897	chr11	72982929	72982930	P2RY6	5031	7358	Non-CGI	TRUE	TRUE	FALSE
cg03306486	chr19	1467952	1467953	C19orf25	148223	11274	CGI	FALSE	TRUE	FALSE
cg03307177	chr3	196347230	196347231	LRRC33	375387	-19424	Non-CGI	FALSE	FALSE	TRUE
cg03310376	chr3	12229001	12229002	TIMP4	7079	-28149	Non-CGI	FALSE	TRUE	FALSE
cg03314315	chr7	127839989	127839990	MIR129-1	406917	-7934	CGI-N-Shore	FALSE	FALSE	TRUE
cg03314644	chr14	31890001	31890002	DTD2	112487	36677	CGI	TRUE	TRUE	FALSE
cg03316176	chr19	6199365	6199366	ACSBG2	81616	63713	CGI	FALSE	TRUE	FALSE
cg03319315	chr10	135202611	135202612	MTG1	92170	-5008	CGI-N-Shore	FALSE	TRUE	FALSE
cg03323636	chr11	9025502	9025503	NRIP3	56675	92	CGI	TRUE	FALSE	FALSE
cg03323793	chr7	151548111	151548112	PRKAG2-AS1	100505483	-26014	CGI	FALSE	TRUE	FALSE
cg03323794	chr7	151215397	151215398	RHEB	6009	1611	CGI	FALSE	TRUE	FALSE
cg03327570	chr2	145304883	145304884	ZEB2-AS1	100303491	-26416	Non-CGI	FALSE	FALSE	TRUE
cg03333377	chr11	93277841	93277842	C11orf75	56935	-1294	CGI-S-Shore	TRUE	FALSE	FALSE
cg03333468	chr3	42532593	42532594	VIPR1	7433	1801	Non-CGI	FALSE	TRUE	FALSE
cg03339537	chr2	157184816	157184817	NR4A2	4929	4469	CGI	TRUE	TRUE	FALSE
cg03339817	chr2	128458281	128458282	SFT2D3	84826	-314	CGI-N-Shore	TRUE	FALSE	FALSE
cg03341377	chr3	39309355	39309356	CX3CR1	1524	13869	Non-CGI	TRUE	TRUE	FALSE
cg03343128	chr1	247712140	247712141	OR2C3	81472	-14998	Non-CGI	TRUE	TRUE	FALSE
cg03344384	chr6	157931843	157931844	MIR3692	100500899	-18319	CGI	FALSE	TRUE	FALSE
cg03344767	chr1	10475318	10475319	APITD1-CORT	100526739	-14839	Non-CGI	FALSE	TRUE	FALSE
cg03345668	chr1	47081524	47081525	MOB3C	148932	1037	CGI-N-Shore	TRUE	TRUE	FALSE
cg03346521	chr4	7740503	7740504	AFAP1-AS1	84740	-15312	CGI	FALSE	TRUE	FALSE
cg03350900	chr6	107955689	107955690	SOBP	55084	144371	CGI	FALSE	TRUE	FALSE
cg03352106	chr12	21926476	21926477	KCNJ8	3764	1269	CGI	FALSE	TRUE	FALSE
cg03354992	chr10	88149475	88149476	GRID1	2894	-23224	CGI	FALSE	FALSE	TRUE
cg03355998	chr3	147124363	147124364	ZIC4	84107	231	CGI-N-Shore	TRUE	FALSE	FALSE
cg03358154	chr4	7241998	7241999	SORCS2	57537	47623	Non-CGI	FALSE	TRUE	FALSE
cg03366285	chr15	83474726	83474727	FSD2	123722	78	CGI-N-Shelf	TRUE	FALSE	FALSE
cg03368358	chr17	3820044	3820045	P2RX1	5023	-83	CGI-S-Shore	TRUE	FALSE	FALSE
cg03371384	chr11	69260271	69260272	CCND1	595	-195600	CGI-S-Shore	FALSE	FALSE	TRUE
cg03373714	chr2	147632094	147632095	PABPC1P2	728773	287468	Non-CGI	FALSE	FALSE	TRUE
cg03376308	chr10	3497811	3497812	PITRM1	10531	-282777	CGI-N-Shore	FALSE	TRUE	FALSE
cg03381704	chr21	30565638	30565639	LINC00189	193629	-161	Non-CGI	TRUE	FALSE	FALSE
cg03382501	chr16	11794641	11794642	SNN	8303	32351	Non-CGI	FALSE	TRUE	FALSE
cg03382797	chr9	135755363	135755364	AK8	158067	-1164	CGI-S-Shore	TRUE	TRUE	FALSE
cg03388789	chr3	147116135	147116136	ZIC4	84107	8459	CGI	TRUE	TRUE	FALSE
cg03389538	chr3	128779498	128779499	GP9	2815	-145	CGI-N-Shore	TRUE	FALSE	FALSE
cg03397716	chr1	6484980	6484981	ESPN	83715	131	CGI	TRUE	FALSE	FALSE
cg03400437	chr18	22006455	22006456	IMPACT	55364	-152	CGI	TRUE	FALSE	FALSE
cg03401297	chr19	41025959	41025960	SPTBN4	57731	53810	CGI	TRUE	TRUE	FALSE
cg03405909	chr11	31845639	31845640	PAX6	5080	-6129	CGI	FALSE	TRUE	FALSE
cg03407747	chr17	6899364	6899365	ALOX12	239	-18	CGI	TRUE	TRUE	FALSE
cg03408945	chr16	8738531	8738532	METTL22	79091	23003	CGI	TRUE	TRUE	FALSE
cg03409108	chr6	34489785	34489786	SPDEF	25803	34323	CGI-S-Shore	FALSE	TRUE	FALSE
cg03411376	chr11	2432720	2432721	TSSC4	10078	11001	CGI	FALSE	TRUE	FALSE
cg03414569	chr3	184971699	184971700	EHHADH	1962	185	CGI	TRUE	TRUE	FALSE
cg03421236	chr16	49486155	49486156	C16orf78	123970	78346	Non-CGI	FALSE	FALSE	TRUE
cg03421440	chr1	92414520	92414521	BRDT	676	-406	CGI-N-Shore	TRUE	FALSE	FALSE
cg03422911	chr1	237205295	237205296	RYR2	6262	-405	CGI	TRUE	FALSE	FALSE
cg03423767	chr13	114876390	114876391	RASA3	22821	21703	CGI	FALSE	TRUE	FALSE
cg03424436	chr20	34043664	34043665	CEP250	11190	667	CGI-S-Shore	FALSE	TRUE	FALSE
cg03425412	chr20	21500337	21500338	NKX2-2	4821	-5672	CGI-S-Shore	FALSE	FALSE	TRUE
cg03427058	chr1	1565025	1565026	MMP23B	8510	-2533	CGI	TRUE	TRUE	FALSE
cg03428047	chr4	140730656	140730657	MGST2	4258	143733	Non-CGI	FALSE	TRUE	FALSE
cg03431741	chr6	41528502	41528503	FOXP4	116113	14337	CGI	FALSE	TRUE	FALSE
cg03436397	chr7	102067162	102067163	ORAI2	80228	-6832	Non-CGI	FALSE	FALSE	TRUE
cg03437157	chr6	100052633	100052634	PRDM13	59336	-2015	CGI	FALSE	FALSE	TRUE
cg03437770	chr16	12442738	12442739	MIR4718	100616195	-371438	Non-CGI	FALSE	TRUE	FALSE
cg03441171	chr8	144965352	144965353	EPPK1	83481	-17917	CGI-S-Shore	FALSE	FALSE	TRUE
cg03443762	chr17	25676827	25676828	WSB1	26118	55720	CGI	FALSE	FALSE	TRUE
cg03447908	chr3	45076599	45076600	CLEC3B	7123	8839	CGI-N-Shore	FALSE	TRUE	FALSE
cg03450829	chr11	1772468	1772469	IFITM10	402778	-643	CGI-S-Shore	TRUE	TRUE	FALSE
cg03450844	chr7	150416671	150416672	GIMAP1-GIMAP5	100527949	3025	CGI-N-Shore	FALSE	TRUE	FALSE
cg03451296	chr14	105940391	105940392	CRIP2	1397	1047	CGI	TRUE	TRUE	FALSE
cg03454425	chr2	134786158	134786159	MIR3679	100500878	-98536	CGI-S-Shore	FALSE	FALSE	TRUE
cg03454607	chr1	165512398	165512399	LRRC52	440699	-1078	Non-CGI	TRUE	TRUE	FALSE
cg03455316	chr15	62516405	62516406	C2CD4B	388125	-58922	CGI	TRUE	FALSE	FALSE
cg03457729	chr15	89953295	89953296	LOC254559	254559	41964	CGI	FALSE	FALSE	TRUE
cg03459312	chr4	184021405	184021406	WWC2	80014	941	CGI-S-Shore	TRUE	TRUE	FALSE
cg03459531	chr20	39996177	39996178	EMILIN3	90187	-678	CGI	TRUE	FALSE	FALSE
cg03460001	chr7	101460955	101460956	CUX1	1523	1770	CGI	FALSE	TRUE	FALSE
cg03461431	chr1	41285096	41285097	KCNQ4	9132	35411	CGI	FALSE	TRUE	FALSE
cg03461851	chr15	62457883	62457884	C2CD4B	388125	-400	CGI	TRUE	FALSE	FALSE
cg03463948	chr11	122612858	122612859	UBASH3B	84959	86459	Non-CGI	FALSE	TRUE	FALSE
cg03466124	chr3	179168156	179168157	GNB4	59345	1213	CGI-N-Shore	FALSE	TRUE	FALSE
cg03466198	chr7	50727932	50727933	DDC	1644	-94777	CGI	FALSE	TRUE	FALSE
cg03466428	chr4	165628435	165628436	LOC100505989	100505989	-46846	Non-CGI	FALSE	FALSE	TRUE
cg03468072	chr12	39539422	39539423	CPNE8	144402	-240001	CGI	FALSE	FALSE	TRUE
cg03470671	chr11	45115584	45115585	PRDM11	56981	19	Non-CGI	TRUE	FALSE	FALSE
cg03471436	chr1	204046026	204046027	SOX13	9580	3779	CGI-S-Shore	FALSE	TRUE	FALSE
cg03475293	chr6	7051303	7051304	RREB1	6239	-56525	CGI	FALSE	FALSE	TRUE
cg03477049	chr18	30347555	30347556	KLHL14	57565	5417	CGI-N-Shelf	FALSE	TRUE	FALSE
cg03477080	chr3	46448920	46448921	CCRL2	9034	198	Non-CGI	TRUE	FALSE	FALSE
cg03477792	chr4	77819574	77819575	SOWAHB	345079	-571	CGI	TRUE	FALSE	FALSE
cg03478448	chr16	56945735	56945736	HERPUD1	9709	-20011	Non-CGI	FALSE	TRUE	FALSE
cg03480337	chr8	65284519	65284520	LOC100130155	100130155	-1254	CGI	TRUE	FALSE	FALSE
cg03480383	chr16	89930147	89930148	TCF25	22980	-9845	CGI-S-Shelf	FALSE	TRUE	FALSE
cg03482682	chr20	708659	708660	SLC52A3	113278	40567	CGI	FALSE	FALSE	TRUE
cg03489965	chr15	65368982	65368983	RASL12	51285	44	CGI-S-Shore	TRUE	FALSE	FALSE
cg03490759	chr14	100141888	100141889	CYP46A1	10858	-8865	CGI	FALSE	TRUE	FALSE
cg03490881	chr7	150329449	150329450	GIMAP6	474344	285	Non-CGI	TRUE	FALSE	FALSE
cg03493300	chr10	104813866	104813867	CNNM2	54805	135790	Non-CGI	FALSE	TRUE	FALSE
cg03496157	chr12	122458893	122458894	BCL7A	605	-966	CGI	TRUE	FALSE	FALSE
cg03498081	chr16	80061357	80061358	MAF	4094	-426734	Non-CGI	FALSE	FALSE	TRUE
cg03503046	chr8	106595191	106595192	ZFPM2	23414	264043	Non-CGI	FALSE	TRUE	FALSE
cg03503785	chr16	23962572	23962573	PRKCB	5579	115271	Non-CGI	FALSE	TRUE	FALSE
cg03505654	chr1	247579608	247579609	NLRP3	114548	149	Non-CGI	TRUE	TRUE	FALSE
cg03507326	chr16	2801952	2801953	SRRM2	23524	-376	CGI	TRUE	TRUE	FALSE
cg03507641	chr12	1598243	1598244	LOC100292680	100292680	-11412	Non-CGI	FALSE	TRUE	FALSE
cg03508390	chr3	124120796	124120797	UMPS	7372	-328415	Non-CGI	FALSE	TRUE	FALSE
cg03509329	chr14	24520788	24520789	LRRC16B	90668	-416	CGI-N-Shore	TRUE	FALSE	FALSE
cg03510194	chr5	134788007	134788008	TIFAB	497189	80	Non-CGI	TRUE	FALSE	FALSE
cg03510349	chr12	3861616	3861617	EFCAB4B	84766	748	CGI-N-Shore	FALSE	TRUE	FALSE
cg03514239	chr1	153329781	153329782	S100A9	6280	-547	Non-CGI	TRUE	FALSE	FALSE
cg03516577	chr3	169245817	169245818	MECOM	2122	135744	Non-CGI	FALSE	TRUE	FALSE
cg03517476	chr8	63158463	63158464	NKAIN3	286183	-3036	CGI-N-Shelf	FALSE	FALSE	TRUE
cg03517776	chr2	64834430	64834431	LOC339807	339807	-14	CGI-N-Shore	TRUE	FALSE	FALSE
cg03519157	chr11	46367033	46367034	DGKZ	8525	12577	CGI-N-Shore	TRUE	TRUE	FALSE
cg03519577	chr20	4795886	4795887	RASSF2	9770	8403	Non-CGI	TRUE	TRUE	FALSE
cg03522063	chr10	119302167	119302168	EMX2	2018	210	CGI	TRUE	TRUE	FALSE
cg03523254	chr1	14337733	14337734	PRDM2	7799	310997	Non-CGI	FALSE	FALSE	TRUE
cg03523630	chr6	157040896	157040897	ARID1B	57492	-58166	CGI	FALSE	FALSE	TRUE
cg03523785	chr14	29234981	29234982	FOXG1	2290	-1304	CGI-N-Shore	TRUE	FALSE	FALSE
cg03529960	chr1	24018470	24018471	RPL11	6135	200	CGI	FALSE	TRUE	FALSE
cg03532013	chr19	42592983	42592984	ZNF574	64763	20353	Non-CGI	FALSE	TRUE	FALSE
cg03533256	chr17	72620088	72620089	CD300E	342510	-190	Non-CGI	TRUE	FALSE	FALSE
cg03534208	chr15	100681334	100681335	ADAMTS17	170691	200847	CGI	FALSE	TRUE	FALSE
cg03543954	chr16	85116335	85116336	FAM92B	339145	29777	CGI	FALSE	TRUE	FALSE
cg03545227	chr2	220173100	220173101	PTPRN	5798	1193	CGI	FALSE	TRUE	FALSE
cg03545620	chr1	26871525	26871526	MIR1976	100302190	-9506	Non-CGI	TRUE	TRUE	FALSE
cg03547218	chr7	27190849	27190850	HOXA6	3203	-3455	CGI-S-Shore	FALSE	TRUE	FALSE
cg03548857	chr19	35940174	35940175	FFAR2	2867	-441	CGI-N-Shore	TRUE	TRUE	FALSE
cg03549705	chr16	29674618	29674619	SPN	6693	317	CGI-N-Shore	TRUE	TRUE	FALSE
cg03553587	chr3	28616941	28616942	LINC00693	645206	171	CGI	TRUE	TRUE	FALSE
cg03553758	chr5	121456948	121456949	ZNF474	133923	-8265	Non-CGI	FALSE	FALSE	TRUE
cg03553786	chr3	13692202	13692203	LINC00620	285375	-17	CGI	TRUE	FALSE	FALSE
cg03554335	chr17	62075151	62075152	C17orf72	92340	-558	CGI	TRUE	FALSE	FALSE
cg03554573	chr11	111155021	111155022	C11orf93	120376	-14953	CGI	FALSE	TRUE	FALSE
cg03555227	chr5	170289070	170289071	RANBP17	64901	173	CGI	FALSE	TRUE	FALSE
cg03562414	chr19	52391078	52391079	ZNF577	84765	3065	CGI	TRUE	TRUE	FALSE
cg03562759	chr6	33132611	33132612	COL11A2	1302	27632	CGI-S-Shelf	FALSE	TRUE	FALSE
cg03564727	chr19	49577206	49577207	KCNA7	3743	-1007	CGI-S-Shore	TRUE	FALSE	FALSE
cg03565868	chr11	47400146	47400147	SPI1	6688	-18	Non-CGI	TRUE	TRUE	FALSE
cg03567896	chr4	7067375	7067376	GRPEL1	80273	2423	CGI-N-Shore	FALSE	TRUE	FALSE
cg03569637	chr12	47609357	47609358	PCED1B-AS1	100233209	867	Non-CGI	TRUE	TRUE	FALSE
cg03580292	chr4	174411723	174411724	HAND2	9464	39653	CGI-N-Shelf	FALSE	FALSE	TRUE
cg03582047	chr17	9729235	9729236	GLP2R	9340	-144	Non-CGI	TRUE	FALSE	FALSE
cg03582285	chr17	40700314	40700315	HSD17B1	3292	-3668	CGI	FALSE	FALSE	TRUE
cg03585017	chr11	64213249	64213250	MIR1237	100302280	77174	CGI-N-Shelf	FALSE	FALSE	TRUE
cg03585969	chr10	35415529	35415530	CREM	1390	-238	CGI	TRUE	FALSE	FALSE
cg03590237	chr6	52439807	52439808	TRAM2	9697	2053	CGI-N-Shore	FALSE	TRUE	FALSE
cg03593550	chr19	54485404	54485405	MIR935	100126325	-155	CGI	TRUE	TRUE	FALSE
cg03593578	chr2	45028225	45028226	SIX3	6496	-140810	CGI-N-Shore	FALSE	FALSE	TRUE
cg03594868	chr19	18234829	18234830	IL12RB1	3594	-25202	CGI	FALSE	TRUE	FALSE
cg03597491	chr11	113945432	113945433	ZBTB16	7704	15000	CGI-N-Shore	FALSE	TRUE	FALSE
cg03600516	chr5	14581651	14581652	FAM105A	54491	-238	CGI	TRUE	FALSE	FALSE
cg03602014	chr5	126564681	126564682	MEGF10	84466	-61773	CGI	FALSE	FALSE	TRUE
cg03604067	chr7	1980273	1980274	MIR4655	100616160	-96383	CGI	TRUE	TRUE	FALSE
cg03605610	chr6	41394765	41394766	NCR2	9436	91236	CGI	FALSE	FALSE	TRUE
cg03606269	chr5	77779546	77779547	SCAMP1	9522	123206	Non-CGI	FALSE	FALSE	TRUE
cg03607117	chr3	53080440	53080441	SFMBT1	51460	-350	CGI	TRUE	FALSE	FALSE
cg03610527	chr2	242174889	242174890	ANO7	50636	46964	CGI	FALSE	TRUE	FALSE
cg03610970	chr12	6729018	6729019	CHD4	1108	-12466	CGI-N-Shore	FALSE	TRUE	FALSE
cg03615568	chr11	106892666	106892667	GUCY1A2	2977	-3494	CGI-S-Shelf	FALSE	FALSE	TRUE
cg03617826	chr5	140718405	140718406	PCDHGA2	56113	50	CGI-N-Shore	TRUE	TRUE	FALSE
cg03618741	chr1	182581547	182581548	LOC284648	284648	-2726	CGI-N-Shelf	FALSE	FALSE	TRUE
cg03622664	chr13	21371628	21371629	N6AMT2	221143	-23532	Non-CGI	FALSE	TRUE	FALSE
cg03623982	chr6	37470086	37470087	CCDC167	154467	-2385	CGI-S-Shelf	FALSE	FALSE	TRUE
cg03625953	chr17	1975218	1975219	HIC1	3090	17769	Non-CGI	FALSE	TRUE	FALSE
cg03630015	chr2	219747459	219747460	WNT10A	80326	2203	CGI-S-Shore	FALSE	TRUE	FALSE
cg03630821	chr19	58861702	58861703	A1BG-AS1	503538	2584	CGI	TRUE	TRUE	FALSE
cg03631131	chr3	147115506	147115507	ZIC4	84107	9088	CGI	TRUE	TRUE	FALSE
cg03633073	chr16	89437518	89437519	LOC100287036	100287036	49976	CGI	FALSE	TRUE	FALSE
cg03636048	chr16	72206536	72206537	PMFBP1	83449	-186	Non-CGI	TRUE	FALSE	FALSE
cg03638781	chr16	23880664	23880665	PRKCB	5579	33363	Non-CGI	FALSE	TRUE	FALSE
cg03639603	chr6	27806234	27806235	HIST1H2AK	8330	-116	CGI-S-Shore	TRUE	FALSE	FALSE
cg03644281	chr6	41068752	41068753	ADCY10P1	221442	-19	CGI	TRUE	TRUE	FALSE
cg03645851	chr22	19110554	19110555	DGCR2	9993	-586	CGI-S-Shore	TRUE	FALSE	FALSE
cg03646261	chr2	45235408	45235409	SIX2	10736	1132	CGI-S-Shore	FALSE	TRUE	FALSE
cg03646329	chr13	48987165	48987166	LPAR6	10161	31673	Non-CGI	TRUE	TRUE	FALSE
cg03646542	chr5	172076155	172076156	NEURL1B	54492	7878	Non-CGI	FALSE	TRUE	FALSE
cg03649649	chr17	56408197	56408198	MIR142	406934	480	Non-CGI	FALSE	TRUE	FALSE
cg03650119	chr1	228346014	228346015	IBA57	200205	-7413	CGI	TRUE	TRUE	FALSE
cg03652525	chr3	72149324	72149325	LOC201617	201617	-51082	CGI	TRUE	FALSE	FALSE
cg03653601	chr16	16156039	16156040	ABCC1	4363	112604	Non-CGI	FALSE	TRUE	FALSE
cg03654273	chr1	19803932	19803933	CAPZB	832	8132	Non-CGI	FALSE	TRUE	FALSE
cg03654504	chr1	37495105	37495106	GRIK3	2899	4737	CGI-N-Shelf	FALSE	TRUE	FALSE
cg03655371	chr5	134827355	134827356	TIFAB	497189	-39265	CGI	FALSE	FALSE	TRUE
cg03658251	chr13	50265850	50265851	EBPL	84650	-226	CGI	TRUE	FALSE	FALSE
cg03660710	chr22	50631079	50631080	TRABD	80305	6719	CGI-S-Shore	FALSE	TRUE	FALSE
cg03663120	chr7	2284600	2284601	NUDT1	4521	2742	CGI	FALSE	TRUE	FALSE
cg03673965	chr6	108497734	108497735	NR2E1	7101	10518	CGI	FALSE	TRUE	FALSE
cg03678274	chr1	236017128	236017129	MIR1537	100302139	-767	Non-CGI	TRUE	TRUE	FALSE
cg03678609	chr3	148804556	148804557	HLTF	6596	-214	CGI	TRUE	FALSE	FALSE
cg03681057	chr5	143172702	143172703	HMHB1	57824	-19022	Non-CGI	FALSE	FALSE	TRUE
cg03682366	chr2	239072199	239072200	KLHL30	377007	24835	CGI	TRUE	FALSE	FALSE
cg03685886	chr16	86912525	86912526	FOXL1	2300	300409	CGI	FALSE	FALSE	TRUE
cg03688818	chr3	49711147	49711148	APEH	327	-286	CGI	TRUE	FALSE	FALSE
cg03688987	chr19	54761178	54761179	LILRB5	10990	-10	Non-CGI	TRUE	TRUE	FALSE
cg03689181	chr4	6927859	6927860	TBC1D14	57533	16687	CGI	FALSE	TRUE	FALSE
cg03690956	chr10	118900324	118900325	VAX1	11023	-2511	CGI	FALSE	FALSE	TRUE
cg03697509	chr11	72466028	72466029	MIR4692	100616410	-28545	CGI	FALSE	TRUE	FALSE
cg03699459	chr10	4864636	4864637	AKR1E2	83592	-3764	CGI-N-Shelf	FALSE	FALSE	TRUE
cg03699623	chr2	121200515	121200516	LOC84931	84931	23408	CGI	FALSE	FALSE	TRUE
cg03701759	chr13	99174930	99174931	STK24	8428	54464	Non-CGI	TRUE	TRUE	FALSE
cg03702545	chr2	165812297	165812298	SLC38A11	151258	-261	CGI-S-Shore	TRUE	FALSE	FALSE
cg03704673	chr17	4692287	4692288	GLTPD2	388323	32	CGI-N-Shore	TRUE	FALSE	FALSE
cg03705621	chr21	46898789	46898790	COL18A1-AS1	378832	-53803	CGI	FALSE	TRUE	FALSE
cg03710354	chr17	72919704	72919705	USH1G	124590	-352	CGI	TRUE	FALSE	FALSE
cg03718241	chr6	3623988	3623989	PXDC1	221749	128256	Non-CGI	FALSE	FALSE	TRUE
cg03719128	chr10	31607150	31607151	ZEB1	6935	-272	CGI	TRUE	TRUE	FALSE
cg03719155	chr19	11689880	11689881	ACP5	54	-78	CGI-S-Shore	TRUE	FALSE	FALSE
cg03722295	chr19	10519375	10519376	CDC37	11140	-5103	CGI-S-Shelf	FALSE	FALSE	TRUE
cg03725354	chr12	70005609	70005610	LRRC10	376132	-666	Non-CGI	TRUE	FALSE	FALSE
cg03727500	chr2	232348334	232348335	NCL	4691	-19128	CGI	FALSE	FALSE	TRUE
cg03727754	chr12	2564100	2564101	LOC283440	283440	316733	Non-CGI	FALSE	TRUE	FALSE
cg03728296	chr12	58013271	58013272	SLC26A10	65012	-420	CGI	TRUE	FALSE	FALSE
cg03729251	chr4	151501035	151501036	MAB21L2	10586	-2040	CGI	FALSE	TRUE	FALSE
cg03733207	chr20	36932553	36932554	BPI	671	0	Non-CGI	TRUE	FALSE	FALSE
cg03734026	chr22	50622440	50622441	TRABD	80305	-1917	CGI-N-Shore	TRUE	FALSE	FALSE
cg03734595	chr18	9333974	9333975	TWSG1	57045	-789	CGI	TRUE	FALSE	FALSE
cg03737424	chr16	67550511	67550512	FAM65A	79567	-12204	Non-CGI	FALSE	FALSE	TRUE
cg03738025	chr6	105388694	105388695	LIN28B	389421	-16227	CGI	FALSE	FALSE	TRUE
cg03739177	chr17	27889826	27889827	ABHD15	116236	4214	CGI-N-Shelf	FALSE	TRUE	FALSE
cg03739609	chr6	31555016	31555017	LST1	7940	1059	Non-CGI	TRUE	TRUE	FALSE
cg03744197	chr4	1049922	1049923	FGFRL1	53834	44981	CGI	FALSE	FALSE	TRUE
cg03744842	chr7	45067319	45067320	CCM2	83605	27973	Non-CGI	TRUE	TRUE	FALSE
cg03747657	chr1	2751217	2751218	TTC34	100287898	-44986	CGI	FALSE	FALSE	TRUE
cg03750367	chr9	124263631	124263632	GGTA1P	2681	-1324	CGI-S-Shore	TRUE	FALSE	FALSE
cg03750478	chr16	29757375	29757376	C16orf54	283897	-34	Non-CGI	TRUE	TRUE	FALSE
cg03752935	chr10	128592524	128592525	DOCK1	1793	-1497	CGI-N-Shore	TRUE	FALSE	FALSE
cg03753191	chr13	43566902	43566903	EPSTI1	94240	-524	CGI-S-Shore	TRUE	FALSE	FALSE
cg03755794	chr5	156390431	156390432	TIMD4	91937	-164	Non-CGI	TRUE	FALSE	FALSE
cg03757805	chr13	111521981	111521982	LINC00346	283487	672	CGI	TRUE	FALSE	FALSE
cg03758011	chr19	46294482	46294483	DMWD	1762	1576	CGI-N-Shore	FALSE	TRUE	FALSE
cg03760191	chr10	22623047	22623048	SPAG6	9576	-11325	CGI	FALSE	FALSE	TRUE
cg03761113	chr1	157811724	157811725	CD5L	922	-89	Non-CGI	TRUE	FALSE	FALSE
cg03762994	chr17	6899332	6899333	ALOX12	239	-50	CGI	TRUE	TRUE	FALSE
cg03764364	chr10	29480551	29480552	LYZL1	84569	-97437	Non-CGI	FALSE	FALSE	TRUE
cg03765041	chr7	158620335	158620336	ESYT2	57488	1982	CGI-N-Shore	FALSE	TRUE	FALSE
cg03766174	chr16	81547907	81547908	CMIP	80790	69131	Non-CGI	FALSE	TRUE	FALSE
cg03768175	chr18	76615402	76615403	SALL3	27164	-124871	CGI-N-Shore	FALSE	FALSE	TRUE
cg03771840	chr6	30140145	30140146	TRIM15	89870	9161	CGI	FALSE	TRUE	FALSE
cg03771844	chr14	90042222	90042223	FOXN3-AS2	29018	-336	Non-CGI	TRUE	TRUE	FALSE
cg03772020	chr6	148879122	148879123	UST	10090	-189147	CGI-N-Shore	FALSE	FALSE	TRUE
cg03773809	chr4	120038219	120038220	MYOZ2	51778	-18718	Non-CGI	FALSE	FALSE	TRUE
cg03775416	chr19	19368775	19368776	HAPLN4	404037	15297	CGI	FALSE	TRUE	FALSE
cg03776194	chr16	88770966	88770967	RNF166	115992	1861	CGI-S-Shore	TRUE	TRUE	FALSE
cg03776506	chr16	30581384	30581385	ZNF688	146542	2342	CGI	FALSE	TRUE	FALSE
cg03778138	chr21	46077731	46077732	KRTAP12-3	386683	-116	Non-CGI	TRUE	TRUE	FALSE
cg03780132	chr5	42951346	42951347	LOC648987	648987	67565	CGI	FALSE	FALSE	TRUE
cg03781262	chr19	58879871	58879872	A1BG	1	-5656	CGI	TRUE	TRUE	FALSE
cg03781505	chr17	16310359	16310360	TRPV2	51393	-8495	CGI	FALSE	FALSE	TRUE
cg03781727	chr7	22007540	22007541	CDCA7L	55536	-21997	Non-CGI	FALSE	FALSE	TRUE
cg03783907	chr6	26446387	26446388	BTN3A3	10384	5686	Non-CGI	FALSE	TRUE	FALSE
cg03785755	chr6	26196794	26196795	HIST1H3D	8351	2668	CGI	FALSE	FALSE	TRUE
cg03786327	chr13	100644473	100644474	ZIC2	7546	10446	CGI	FALSE	FALSE	TRUE
cg03789294	chr6	33265243	33265244	RGL2	5863	1920	CGI-N-Shore	TRUE	TRUE	FALSE
cg03792788	chr2	121338607	121338608	LOC84931	84931	-114681	CGI	FALSE	FALSE	TRUE
cg03796381	chr15	36650033	36650034	C15orf41	84529	-221777	Non-CGI	FALSE	FALSE	TRUE
cg03796729	chr14	29247336	29247337	C14orf23	387978	5425	CGI-N-Shore	FALSE	TRUE	FALSE
cg03797139	chr6	139472304	139472305	HECA	51696	16054	Non-CGI	FALSE	TRUE	FALSE
cg03798942	chr11	128566958	128566959	FLI1-AS1	100507392	-1039	CGI-S-Shore	TRUE	TRUE	FALSE
cg03799530	chr12	111843215	111843216	SH2B3	10019	-535	CGI	TRUE	FALSE	FALSE
cg03800844	chr13	112652438	112652439	SOX1	6656	-69473	CGI-N-Shore	FALSE	FALSE	TRUE
cg03809021	chr16	89831123	89831124	VPS9D1	9605	-43728	Non-CGI	FALSE	TRUE	FALSE
cg03811891	chr6	158937286	158937287	TMEM181	57583	-20180	CGI	FALSE	FALSE	TRUE
cg03812309	chr1	46938281	46938282	DMBX1	127343	-34385	Non-CGI	FALSE	FALSE	TRUE
cg03813151	chr6	149778058	149778059	ZC3H12D	340152	28088	CGI	FALSE	TRUE	FALSE
cg03820795	chr17	4337140	4337141	SPNS3	201305	-77	Non-CGI	TRUE	FALSE	FALSE
cg03821157	chr2	216325022	216325023	FN1	2335	-24230	Non-CGI	FALSE	FALSE	TRUE
cg03828947	chr5	1800132	1800133	MRPL36	64979	-175	CGI	TRUE	FALSE	FALSE
cg03839717	chr6	167507762	167507763	GPR31	2853	63555	CGI	FALSE	TRUE	FALSE
cg03839794	chr14	34269541	34269542	EGLN3	112399	150741	CGI	FALSE	TRUE	FALSE
cg03840694	chr7	139991704	139991705	SLC37A3	84255	106605	CGI-N-Shore	FALSE	FALSE	TRUE
cg03841065	chr20	35274627	35274628	SLA2	84174	-7	Non-CGI	TRUE	FALSE	FALSE
cg03844372	chr10	24160305	24160306	KIAA1217	56243	176629	Non-CGI	FALSE	TRUE	FALSE
cg03852144	chr5	95159639	95159640	GLRX	2745	-1061	CGI-S-Shore	TRUE	FALSE	FALSE
cg03861097	chr21	34393589	34393590	OLIG2	10215	-4625	CGI-S-Shore	FALSE	FALSE	TRUE
cg03872934	chr6	33151135	33151136	COL11A2	1302	9108	Non-CGI	FALSE	TRUE	FALSE
cg03873049	chr5	149625194	149625195	CAMK2A	815	44207	Non-CGI	FALSE	TRUE	FALSE
cg03875819	chr10	4386802	4386803	LINC00705	338588	-311544	Non-CGI	FALSE	FALSE	TRUE
cg03879180	chr2	24713283	24713284	NCOA1	8648	-73894	CGI	FALSE	FALSE	TRUE
cg03882270	chr4	3384736	3384737	HGFAC	3083	-58988	CGI-N-Shelf	FALSE	TRUE	FALSE
cg03887528	chr2	231090531	231090532	SP140	11262	85	Non-CGI	TRUE	FALSE	FALSE
cg03889013	chr10	134143489	134143490	LRRC27	80313	-2123	CGI	FALSE	TRUE	FALSE
cg03892308	chr5	140800495	140800496	PCDHGA11	56105	-40	CGI-S-Shore	TRUE	TRUE	FALSE
cg03892838	chr2	238599734	238599735	LRRFIP1	9208	63509	CGI	TRUE	TRUE	FALSE
cg03895047	chr3	27114861	27114862	NEK10	152110	296049	Non-CGI	FALSE	FALSE	TRUE
cg03897412	chr12	57599056	57599057	MIR1228	100302201	10768	CGI-S-Shore	FALSE	TRUE	FALSE
cg03898832	chr5	140868130	140868131	PCDHGC5	56097	-676	CGI-S-Shelf	TRUE	TRUE	FALSE
cg03898952	chr13	107069935	107069936	LINC00460	728192	41023	Non-CGI	FALSE	FALSE	TRUE
cg03899510	chr6	170581690	170581691	LOC154449	154449	-10032	CGI-S-Shore	FALSE	FALSE	TRUE
cg03899643	chr1	90205170	90205171	LRRC8D	55144	-81401	Non-CGI	FALSE	FALSE	TRUE
cg03900314	chr6	31695552	31695553	DDAH2	23564	2485	CGI-N-Shore	FALSE	TRUE	FALSE
cg03906681	chr15	38378237	38378238	TMCO5A	145942	151409	Non-CGI	FALSE	FALSE	TRUE
cg03908676	chr11	10590282	10590283	LYVE1	10894	81	Non-CGI	TRUE	TRUE	FALSE
cg03919657	chr17	48502312	48502313	ACSF2	80221	-1205	CGI-N-Shore	TRUE	FALSE	FALSE
cg03920999	chr3	10334760	10334761	GHRL	51738	-128	Non-CGI	TRUE	TRUE	FALSE
cg03922423	chr8	144408588	144408589	TOP1MT	116447	33559	CGI	TRUE	TRUE	FALSE
cg03923640	chr16	87174624	87174625	C16orf95	100506581	176400	CGI	FALSE	TRUE	FALSE
cg03927812	chr11	130271903	130271904	ADAMTS8	11095	26634	CGI	TRUE	TRUE	FALSE
cg03932361	chr17	72667394	72667395	RAB37	326624	137	CGI	TRUE	FALSE	FALSE
cg03933279	chr12	12849136	12849137	GPR19	2842	-14	CGI	TRUE	FALSE	FALSE
cg03935116	chr12	31476565	31476566	FLJ13224	79857	-683	CGI-N-Shore	TRUE	TRUE	FALSE
cg03937290	chr1	27852711	27852712	WASF2	10163	-36032	CGI-N-Shore	FALSE	FALSE	TRUE
cg03941587	chr4	123747634	123747635	FGF2	2247	-227	CGI	TRUE	FALSE	FALSE
cg03945003	chr6	33423747	33423748	ZBTB9	221504	1390	CGI-S-Shore	TRUE	TRUE	FALSE
cg03946297	chr1	71140689	71140690	CTH	1491	263787	Non-CGI	FALSE	FALSE	TRUE
cg03947203	chr11	118987153	118987154	HINFP	25988	-5078	CGI-S-Shore	FALSE	TRUE	FALSE
cg03950655	chr1	64379958	64379959	ROR1	4919	140267	Non-CGI	FALSE	TRUE	FALSE
cg03954393	chr1	204679626	204679627	LRRN2	10446	-25028	Non-CGI	FALSE	FALSE	TRUE
cg03957108	chr2	63276545	63276546	OTX1	5013	-645	CGI-S-Shore	TRUE	FALSE	FALSE
cg03960279	chr15	80541641	80541642	LOC283688	283688	92504	CGI-N-Shore	FALSE	FALSE	TRUE
cg03960424	chr20	57042304	57042305	APCDD1L	164284	47643	CGI	FALSE	TRUE	FALSE
cg03961010	chr10	64397487	64397488	ADO	84890	-167027	Non-CGI	FALSE	TRUE	FALSE
cg03963327	chr11	9025730	9025731	NRIP3	56675	-133	CGI	TRUE	FALSE	FALSE
cg03963853	chr16	4732369	4732370	NUDT16L1	84309	-11323	CGI	FALSE	TRUE	FALSE
cg03966751	chr17	48367746	48367747	TMEM92	162461	18978	Non-CGI	FALSE	FALSE	TRUE
cg03968755	chr4	85418816	85418817	NKX6-1	4825	569	CGI	TRUE	FALSE	FALSE
cg03969902	chr1	2980546	2980547	FLJ42875	440556	-195	CGI	TRUE	FALSE	FALSE
cg03970899	chr22	19710091	19710092	SEPT5-GP1BB	100526833	8103	CGI	TRUE	TRUE	FALSE
cg03971454	chr1	43770557	43770558	TIE1	7075	3990	CGI-N-Shore	TRUE	TRUE	FALSE
cg03975694	chr19	38042472	38042473	ZNF540	163255	198	CGI	TRUE	TRUE	FALSE
cg03975844	chr1	205318888	205318889	KLHDC8A	55220	7276	Non-CGI	FALSE	TRUE	FALSE
cg03977385	chr16	48468609	48468610	SIAH1	6477	13698	Non-CGI	FALSE	TRUE	FALSE
cg03980424	chr10	3526723	3526724	KLF6	1316	300748	Non-CGI	FALSE	TRUE	FALSE
cg03983213	chr7	157475737	157475738	MIR153-2	406945	-108622	CGI	FALSE	TRUE	FALSE
cg03985801	chr1	202182603	202182604	LGR6	59352	19484	CGI-N-Shore	TRUE	TRUE	FALSE
cg03986858	chr4	41879651	41879652	TMEM33	55161	-57484	CGI-N-Shore	FALSE	FALSE	TRUE
cg03988297	chr1	219060547	219060548	LOC643723	643723	286581	Non-CGI	FALSE	FALSE	TRUE
cg03989480	chr1	50885352	50885353	DMRTA2	63950	3765	CGI	FALSE	TRUE	FALSE
cg03992323	chr1	224023297	224023298	TP53BP2	7159	10375	Non-CGI	FALSE	TRUE	FALSE
cg03994651	chr19	49004677	49004678	LMTK3	114783	11767	CGI	FALSE	TRUE	FALSE
cg03997039	chr16	29703361	29703362	QPRT	23475	12919	CGI-N-Shore	FALSE	TRUE	FALSE
cg03998606	chr3	32856104	32856105	TRIM71	131405	-3404	CGI-N-Shore	FALSE	FALSE	TRUE
cg04003582	chr5	92936507	92936508	NR2F1	7025	17463	CGI-S-Shore	FALSE	FALSE	TRUE
cg04007841	chr11	65307006	65307007	SCYL1	57410	14457	CGI	FALSE	TRUE	FALSE
cg04008429	chr3	160167646	160167647	TRIM59	286827	-19	CGI	TRUE	FALSE	FALSE
cg04010122	chr2	39346883	39346884	SOS1	6654	4601	CGI-N-Shore	FALSE	TRUE	FALSE
cg04011062	chr7	142724374	142724375	OR9A2	135924	-154	Non-CGI	TRUE	FALSE	FALSE
cg04013090	chr8	67342485	67342486	RRS1	23212	1221	CGI-S-Shore	TRUE	FALSE	FALSE
cg04014586	chr1	245704710	245704711	KIF26B	55083	386422	Non-CGI	FALSE	TRUE	FALSE
cg04014609	chr15	70392497	70392498	TLE3	7090	-2240	CGI-S-Shore	FALSE	FALSE	TRUE
cg04017276	chr22	44577135	44577136	PARVG	64098	8298	CGI-N-Shore	TRUE	TRUE	FALSE
cg04019983	chr6	31465865	31465866	MICB	4277	3206	CGI	TRUE	TRUE	FALSE
cg04023204	chr16	68281979	68281980	PLA2G15	23659	2731	CGI-S-Shelf	FALSE	TRUE	FALSE
cg04025150	chr1	34642862	34642863	C1orf94	84970	10237	CGI	TRUE	TRUE	FALSE
cg04027328	chr1	11372138	11372139	UBIAD1	29914	38882	Non-CGI	FALSE	FALSE	TRUE
cg04027548	chr12	21926447	21926448	KCNJ8	3764	1298	CGI	FALSE	TRUE	FALSE
cg04029027	chr7	130125811	130125812	MEST	4232	-203	CGI-N-Shore	TRUE	FALSE	FALSE
cg04029159	chr11	415080	415081	SIGIRR	59307	2315	CGI-N-Shore	TRUE	TRUE	FALSE
cg04037044	chr22	17440609	17440610	GAB4	128954	48501	Non-CGI	FALSE	FALSE	TRUE
cg04037218	chr6	4079534	4079535	C6orf201	404220	93	CGI	TRUE	TRUE	FALSE
cg04038089	chr13	112860420	112860421	SOX1	6656	138506	CGI-S-Shore	FALSE	FALSE	TRUE
cg04041283	chr8	1414952	1414953	DLGAP2	9228	-34615	CGI-S-Shore	FALSE	FALSE	TRUE
cg04042828	chr4	152328900	152328901	FAM160A1	729830	-1496	CGI-N-Shore	TRUE	FALSE	FALSE
cg04045544	chr16	27298091	27298092	NSMCE1	197370	-17977	Non-CGI	FALSE	TRUE	FALSE
cg04050331	chr10	8096088	8096089	GATA3	2625	-577	CGI	TRUE	FALSE	FALSE
cg04055238	chr20	56251166	56251167	PMEPA1	56937	35373	CGI	FALSE	TRUE	FALSE
cg04055693	chr8	52308227	52308228	PXDNL	137902	413776	Non-CGI	FALSE	TRUE	FALSE
cg04058685	chr6	163756998	163756999	DKFZp451B082	401282	11065	Non-CGI	FALSE	FALSE	TRUE
cg04058799	chr7	151547969	151547970	PRKAG2-AS1	100505483	-26156	CGI-S-Shore	FALSE	TRUE	FALSE
cg04060561	chr6	127663200	127663201	ECHDC1	55862	1552	CGI-N-Shore	FALSE	TRUE	FALSE
cg04065472	chr2	131148175	131148176	PTPN18	26469	34594	CGI-N-Shore	FALSE	FALSE	TRUE
cg04071967	chr17	53511321	53511322	MMD	23531	-11979	Non-CGI	FALSE	FALSE	TRUE
cg04077047	chr2	75361945	75361946	TACR1	6869	64698	Non-CGI	FALSE	TRUE	FALSE
cg04078115	chr22	33278114	33278115	TIMP3	7078	81311	Non-CGI	FALSE	TRUE	FALSE
cg04078410	chr5	77269250	77269251	TBCA	6902	-197064	CGI	FALSE	FALSE	TRUE
cg04079760	chr16	68269694	68269695	ESRP2	80004	440	CGI	FALSE	TRUE	FALSE
cg04080041	chr5	140811253	140811254	PCDHGA12	26025	1094	CGI	TRUE	TRUE	FALSE
cg04083553	chr3	128778575	128778576	GP9	2815	-1068	CGI-N-Shelf	TRUE	FALSE	FALSE
cg04084348	chr10	75677011	75677012	C10orf55	414236	5522	Non-CGI	FALSE	TRUE	FALSE
cg04085447	chr19	35773328	35773329	HAMP	57817	-80	CGI-S-Shelf	TRUE	FALSE	FALSE
cg04086097	chr7	128580792	128580793	IRF5	3663	3022	CGI-S-Shore	TRUE	TRUE	FALSE
cg04086928	chr9	134612644	134612645	RAPGEF1	2889	2571	CGI-N-Shelf	FALSE	TRUE	FALSE
cg04089901	chr7	7557590	7557591	COL28A1	340267	17868	Non-CGI	TRUE	TRUE	FALSE
cg04094193	chr4	69216103	69216104	YTHDC1	91746	-278	CGI-S-Shore	TRUE	FALSE	FALSE
cg04098051	chr2	155445607	155445608	KCNJ3	3760	-109484	Non-CGI	FALSE	FALSE	TRUE
cg04098585	chr2	204571215	204571216	CD28	940	16	Non-CGI	TRUE	FALSE	FALSE
cg04099095	chr7	27278570	27278571	EVX1	2128	-3592	CGI-N-Shore	FALSE	FALSE	TRUE
cg04099180	chr17	46662651	46662652	HOXB3	3213	4978	CGI	FALSE	TRUE	FALSE
cg04099543	chr11	72983405	72983406	P2RY6	5031	7834	Non-CGI	TRUE	TRUE	FALSE
cg04100124	chr10	69611755	69611756	DNAJC12	56521	-13817	CGI-S-Shore	FALSE	FALSE	TRUE
cg04100956	chr1	94571619	94571620	ABCA4	24	15084	Non-CGI	FALSE	TRUE	FALSE
cg04101755	chr16	3057959	3057960	CLDN9	9080	-4496	CGI-S-Shelf	FALSE	FALSE	TRUE
cg04103021	chr4	174441703	174441704	HAND2	9464	9673	CGI-S-Shore	FALSE	FALSE	TRUE
cg04103761	chr1	26735606	26735607	LIN28A	79727	-1661	CGI-S-Shore	TRUE	FALSE	FALSE
cg04103847	chr10	107442878	107442879	SORCS3	22986	1042018	Non-CGI	FALSE	FALSE	TRUE
cg04104463	chr8	65291341	65291342	MIR124-2	406908	-363	CGI-S-Shore	TRUE	TRUE	FALSE
cg04105416	chr7	4911051	4911052	PAPOLB	56903	-9425	CGI	FALSE	TRUE	FALSE
cg04107759	chr10	122741763	122741764	WDR11-AS1	283089	-131071	CGI-S-Shelf	FALSE	FALSE	TRUE
cg04108438	chr3	64427959	64427960	PRICKLE2	166336	-216827	CGI-N-Shelf	FALSE	FALSE	TRUE
cg04111789	chr6	41908262	41908263	BYSL	705	19296	CGI	FALSE	TRUE	FALSE
cg04113094	chr14	54686625	54686626	CDKN3	1033	-177046	CGI-S-Shore	FALSE	FALSE	TRUE
cg04114655	chr2	220377593	220377594	ASIC4	55515	-1297	CGI-N-Shore	TRUE	FALSE	FALSE
cg04115740	chr17	6690948	6690949	FBXO39	162517	11395	Non-CGI	FALSE	TRUE	FALSE
cg04116756	chr12	125131234	125131235	NCOR2	9612	-79223	CGI	FALSE	FALSE	TRUE
cg04117972	chr1	227635322	227635323	ZNF678	339500	-115896	CGI	FALSE	FALSE	TRUE
cg04122371	chr14	35876447	35876448	NFKBIA	4792	-2486	CGI-S-Shore	FALSE	FALSE	TRUE
cg04123507	chr12	52695270	52695271	KRT81	3887	6883	CGI-N-Shore	TRUE	TRUE	FALSE
cg04126261	chr2	233925181	233925182	INPP5D	3635	144	CGI	TRUE	FALSE	FALSE
cg04128065	chr1	229733305	229733306	TAF5L	27097	28487	CGI-S-Shelf	FALSE	TRUE	FALSE
cg04131194	chr1	44405267	44405268	ARTN	9048	6274	CGI-S-Shelf	FALSE	FALSE	TRUE
[truncated: 9,605 more rows]

## Sheet: neuron
Supplemental Table 4: List of CpG sites hypermethylated in neuron during aging
Target ID	Chromosome	start	end	nearest.gene	nearest.gene.id	disttotss	hmm.cpgi	prom.reg	intra.reg	inter.reg
cg00003994	chr7	15725862	15725863	MEOX2	4223	444	CGI-S-Shore	TRUE	FALSE	FALSE
cg00004806	chr6	161558105	161558106	AGPAT4-IT1	79992	24907	Non-CGI	FALSE	TRUE	FALSE
cg00005847	chr2	177029073	177029074	HOXD3	3232	267	CGI-S-Shore	FALSE	TRUE	FALSE
cg00006081	chr10	124908907	124908908	HMX2	3167	1268	CGI-S-Shore	FALSE	TRUE	FALSE
cg00006459	chr4	148635716	148635717	ARHGAP10	79658	-17735	Non-CGI	FALSE	FALSE	TRUE
cg00008695	chr8	960721	960722	ERICH1	157697	-279494	CGI-N-Shore	FALSE	TRUE	FALSE
cg00021275	chr2	128142155	128142156	PROC	5624	-33839	CGI-N-Shelf	FALSE	FALSE	TRUE
cg00026703	chr15	96870030	96870031	NR2F2	7026	872	CGI	FALSE	TRUE	FALSE
cg00029284	chr12	111731203	111731204	FAM109A	144717	75720	CGI	FALSE	TRUE	FALSE
cg00032205	chr8	98290372	98290373	TSPYL5	85453	-195	CGI	TRUE	FALSE	FALSE
cg00035316	chr2	176993017	176993018	HOXD8	3234	-1403	CGI	TRUE	FALSE	FALSE
cg00036408	chr17	79316841	79316842	TMEM105	284186	-12366	CGI	FALSE	FALSE	TRUE
cg00038736	chr19	38877134	38877135	GGN	199720	1532	CGI	FALSE	TRUE	FALSE
cg00052665	chr17	9941095	9941096	RCVRN	5957	-132410	Non-CGI	TRUE	TRUE	FALSE
cg00054791	chr17	46985412	46985413	UBE2Z	65264	-317	CGI-N-Shore	TRUE	FALSE	FALSE
cg00061086	chr14	50088260	50088261	MGAT2	4247	770	CGI	TRUE	TRUE	FALSE
cg00065726	chr3	194406929	194406930	FAM43A	131583	306	CGI	TRUE	FALSE	FALSE
cg00069242	chr14	23450527	23450528	AJUBA	84962	1319	CGI	TRUE	FALSE	FALSE
cg00070181	chr6	2467820	2467821	C6orf195	154386	167476	Non-CGI	FALSE	TRUE	FALSE
cg00075123	chr3	72786960	72786961	SHQ1	55164	110636	CGI-N-Shore	FALSE	FALSE	TRUE
cg00078968	chr1	228225659	228225660	WNT3A	89780	30935	CGI	FALSE	TRUE	FALSE
cg00087417	chr6	35887678	35887679	SRPK1	6732	1277	CGI-N-Shore	FALSE	TRUE	FALSE
cg00088042	chr10	103892309	103892310	PPRC1	23082	-476	CGI-N-Shore	TRUE	FALSE	FALSE
cg00090674	chr22	50446678	50446679	IL17REL	400935	4375	CGI-N-Shore	FALSE	TRUE	FALSE
cg00095333	chr17	70172535	70172536	SOX9	6662	55373	Non-CGI	FALSE	FALSE	TRUE
cg00095526	chr1	201081686	201081687	CACNA1S	779	6	CGI-N-Shore	TRUE	FALSE	FALSE
cg00096922	chr7	96654185	96654186	DLX5	1749	-41	CGI	TRUE	FALSE	FALSE
cg00103299	chr15	93362247	93362248	ASB9P1	728619	23532	CGI-N-Shore	FALSE	FALSE	TRUE
cg00112260	chr1	32104920	32104921	PEF1	553115	5916	Non-CGI	FALSE	TRUE	FALSE
cg00115980	chr1	207818434	207818435	CR1L	1379	-22	CGI	TRUE	FALSE	FALSE
cg00116092	chr1	217313044	217313045	ESRRG	2104	-1946	CGI	TRUE	FALSE	FALSE
cg00118158	chr2	100629297	100629298	AFF3	3899	129738	Non-CGI	FALSE	TRUE	FALSE
cg00123324	chr22	50875752	50875753	SBF1	6305	37710	CGI	FALSE	TRUE	FALSE
cg00124095	chr3	72305082	72305083	LOC201617	201617	104673	Non-CGI	FALSE	FALSE	TRUE
cg00127070	chr8	119011673	119011674	EXT1	2131	112383	Non-CGI	FALSE	TRUE	FALSE
cg00135852	chr17	46703646	46703647	HOXB9	3219	187	CGI	TRUE	FALSE	FALSE
cg00145093	chr10	11027947	11027948	CELF2	10659	-19310	Non-CGI	FALSE	FALSE	TRUE
cg00146951	chr10	17270376	17270377	VIM	7431	117	CGI	TRUE	TRUE	FALSE
cg00147307	chr1	42125463	42125464	EDN2	1907	-175118	CGI-N-Shore	FALSE	TRUE	FALSE
cg00155526	chr5	32713290	32713291	NPR3	4883	2546	CGI	FALSE	TRUE	FALSE
cg00158081	chr18	47753746	47753747	MYO5B	4645	-32294	Non-CGI	FALSE	TRUE	FALSE
cg00160914	chr1	112299263	112299264	FAM212B	55924	-843	CGI-S-Shore	TRUE	TRUE	FALSE
cg00172227	chr1	18006887	18006888	ACTL8	81569	-74919	Non-CGI	FALSE	TRUE	FALSE
cg00174428	chr1	165204791	165204792	LMX1A	4009	121159	CGI	FALSE	TRUE	FALSE
cg00176709	chr6	85483334	85483335	TBX18	9096	-9434	CGI	FALSE	FALSE	TRUE
cg00177797	chr1	180203837	180203838	LHX4	89884	4403	CGI	FALSE	TRUE	FALSE
cg00178356	chr13	28711810	28711811	PAN3	255967	-831	CGI-N-Shore	TRUE	TRUE	FALSE
cg00191102	chr8	1958171	1958172	MYOM2	9172	-34985	CGI-S-Shore	FALSE	FALSE	TRUE
cg00203284	chr1	47910914	47910915	FOXD2	2306	9224	CGI	FALSE	FALSE	TRUE
cg00203913	chr17	13506186	13506187	HS3ST3A1	9955	-941	CGI-S-Shore	TRUE	FALSE	FALSE
cg00207352	chr3	48470181	48470182	PLXNB1	5364	1277	CGI-N-Shore	FALSE	TRUE	FALSE
cg00210538	chr10	65245820	65245821	JMJD1C	221037	-20097	Non-CGI	FALSE	FALSE	TRUE
cg00215182	chr1	22979495	22979496	C1QB	713	-185	Non-CGI	TRUE	FALSE	FALSE
cg00220294	chr16	54322494	54322495	IRX3	79191	-2115	CGI	FALSE	FALSE	TRUE
cg00221096	chr17	67312052	67312053	ABCA5	23461	11269	Non-CGI	TRUE	TRUE	FALSE
cg00231875	chr11	14288293	14288294	RRAS2	22800	97757	Non-CGI	FALSE	TRUE	FALSE
cg00238593	chr12	113619684	113619685	DDX54	79039	3598	CGI-N-Shelf	FALSE	TRUE	FALSE
cg00241274	chr18	44199541	44199542	LOXHD1	125336	37453	Non-CGI	FALSE	TRUE	FALSE
cg00244391	chr6	109420291	109420292	CEP57L1	285753	3934	CGI-S-Shelf	FALSE	TRUE	FALSE
cg00249614	chr1	59593751	59593752	HSD52	729467	18726	Non-CGI	FALSE	FALSE	TRUE
cg00252534	chr7	45612397	45612398	ADCY1	107	-1340	CGI-N-Shore	TRUE	FALSE	FALSE
cg00252733	chr10	102727239	102727240	SEMA4G	57715	-2039	CGI-N-Shore	FALSE	FALSE	TRUE
cg00252781	chr1	179334658	179334659	AXDND1	126859	-195	CGI-N-Shore	TRUE	FALSE	FALSE
cg00252934	chr3	36782736	36782737	DCLK3	85443	-1383	CGI-S-Shelf	TRUE	FALSE	FALSE
cg00253182	chr9	2619314	2619315	VLDLR	7436	-2477	CGI-N-Shore	FALSE	TRUE	FALSE
cg00265863	chr1	28286348	28286349	XKR8	55113	-154	CGI	TRUE	FALSE	FALSE
cg00266388	chr10	134184547	134184548	PWWP2B	170394	-26153	CGI	FALSE	TRUE	FALSE
cg00269800	chr5	140563151	140563152	PCDHB16	57717	2170	CGI	TRUE	FALSE	FALSE
cg00274406	chr5	179229353	179229354	MIR1229	100302156	-4006	CGI-S-Shore	TRUE	TRUE	FALSE
cg00277384	chr10	105454768	105454769	LOC100505839	100505839	-51767	CGI-S-Shore	TRUE	TRUE	FALSE
cg00279755	chr11	103584918	103584919	MIR4693	100616457	-135714	Non-CGI	FALSE	FALSE	TRUE
cg00281551	chr4	41884566	41884567	TMEM33	55161	-52569	CGI-S-Shore	TRUE	FALSE	FALSE
cg00282347	chr1	6241040	6241041	CHD5	26038	-845	CGI	TRUE	FALSE	FALSE
cg00283857	chr6	158018184	158018185	MIR3692	100500899	68019	CGI	FALSE	TRUE	FALSE
cg00286119	chr8	29732574	29732575	LOC286135	286135	-46453	Non-CGI	FALSE	FALSE	TRUE
cg00287974	chr7	64348873	64348874	ZNF273	10793	6001	CGI-N-Shore	FALSE	TRUE	FALSE
cg00289546	chr2	211089678	211089679	ACADL	33	535	CGI	FALSE	TRUE	FALSE
cg00294267	chr16	49572227	49572228	C16orf78	123970	164418	Non-CGI	FALSE	TRUE	FALSE
cg00295572	chr1	3568236	3568237	TP73	7161	-891	CGI	TRUE	FALSE	FALSE
cg00298921	chr8	1309865	1309866	LOC286083	286083	-59037	CGI	FALSE	FALSE	TRUE
cg00302494	chr2	237080354	237080355	GBX2	2637	-3701	CGI	FALSE	FALSE	TRUE
cg00303378	chr1	159825552	159825553	C1orf204	284677	-414	CGI	TRUE	TRUE	FALSE
cg00311131	chr15	72634206	72634207	HEXA-AS1	80072	-34246	Non-CGI	FALSE	TRUE	FALSE
cg00326719	chr2	213401544	213401545	ERBB4	2066	1806	CGI	FALSE	TRUE	FALSE
cg00336150	chr2	118981150	118981151	INSIG2	51141	135099	CGI	FALSE	FALSE	TRUE
cg00336700	chr2	176943704	176943705	EVX2	344191	4984	CGI	FALSE	FALSE	TRUE
cg00338080	chr7	75889659	75889660	HSPB1	3315	-42214	CGI	FALSE	TRUE	FALSE
cg00342891	chr1	113263764	113263765	FAM19A3	284467	574	CGI-N-Shore	FALSE	TRUE	FALSE
cg00352027	chr10	71893159	71893160	AIFM2	84883	-468	CGI-S-Shore	TRUE	FALSE	FALSE
cg00352417	chr3	194408901	194408902	FAM43A	131583	2278	CGI	TRUE	FALSE	FALSE
cg00356500	chr6	32028152	32028153	CYP21A2	1589	22058	CGI-N-Shore	FALSE	TRUE	FALSE
cg00357532	chr2	183903743	183903744	NCKAP1	10787	-513	CGI-S-Shore	TRUE	FALSE	FALSE
cg00361176	chr7	75260791	75260792	PMS2P3	5387	-103337	Non-CGI	FALSE	TRUE	FALSE
cg00367047	chr9	139159108	139159109	QSOX2	169714	-21420	CGI-N-Shore	FALSE	FALSE	TRUE
cg00375589	chr3	15898759	15898760	ANKRD28	23243	2292	CGI-N-Shore	FALSE	TRUE	FALSE
cg00377320	chr17	47988100	47988101	DLX4	1748	-58460	CGI-S-Shore	FALSE	FALSE	TRUE
cg00404923	chr4	184882211	184882212	STOX2	56977	55701	Non-CGI	FALSE	TRUE	FALSE
cg00405803	chr5	87952153	87952154	MIR9-2	407047	10602	CGI-N-Shelf	FALSE	TRUE	FALSE
cg00407245	chr19	55598874	55598875	EPS8L1	54869	15485	CGI	FALSE	TRUE	FALSE
cg00407484	chr19	45566128	45566129	ZNF296	162979	13558	CGI-N-Shore	FALSE	TRUE	FALSE
cg00417823	chr16	56330268	56330269	MIR3935	100500891	50835	Non-CGI	FALSE	TRUE	FALSE
cg00419757	chr5	87695564	87695565	TMEM161B-AS1	100505894	130864	Non-CGI	FALSE	TRUE	FALSE
cg00422311	chr2	161395263	161395264	RBMS1	5937	-44944	Non-CGI	FALSE	FALSE	TRUE
cg00427553	chr16	1605339	1605340	TMEM204	79652	26596	CGI	TRUE	TRUE	FALSE
cg00439658	chr17	72848669	72848670	GRIN2C	2905	8295	CGI	FALSE	TRUE	FALSE
cg00449344	chr12	658824	658825	B4GALNT3	283358	89280	CGI	FALSE	TRUE	FALSE
cg00457195	chr20	61979272	61979273	CHRNA4	1137	30215	CGI	FALSE	TRUE	FALSE
cg00457403	chr3	187387734	187387735	SST	6750	465	CGI	FALSE	TRUE	FALSE
cg00465319	chr3	123339568	123339569	MYLK-AS1	100506826	35164	Non-CGI	TRUE	TRUE	FALSE
cg00472722	chr8	29193340	29193341	DUSP4	1846	14925	CGI-N-Shore	FALSE	TRUE	FALSE
cg00473501	chr17	56354594	56354595	MPO	4353	3700	CGI-N-Shore	FALSE	TRUE	FALSE
cg00473639	chr11	126861050	126861051	MIR3167	100422918	-2611	Non-CGI	FALSE	TRUE	FALSE
cg00474328	chr6	50811836	50811837	TFAP2B	7021	25396	CGI	FALSE	TRUE	FALSE
cg00474746	chr11	35684799	35684800	TRIM44	54765	445	CGI	TRUE	FALSE	FALSE
cg00478442	chr6	33267761	33267762	RGL2	5863	-595	CGI	TRUE	TRUE	FALSE
cg00484206	chr16	66041033	66041034	CDH5	1003	-359490	Non-CGI	FALSE	FALSE	TRUE
cg00486340	chr4	4860026	4860027	MSX1	4487	-1364	CGI	TRUE	FALSE	FALSE
cg00495775	chr2	176972041	176972042	HOXD11	3237	2790	CGI-S-Shore	TRUE	TRUE	FALSE
cg00497219	chr4	3253559	3253560	MSANTD1	345222	2791	CGI-N-Shore	FALSE	TRUE	FALSE
cg00499475	chr12	115122304	115122305	TBX3	6926	-334	CGI	TRUE	FALSE	FALSE
cg00506250	chr3	60747416	60747417	FHIT	2272	489715	Non-CGI	FALSE	TRUE	FALSE
cg00506442	chr1	6340054	6340055	GPR153	387509	-19018	CGI	FALSE	TRUE	FALSE
cg00514723	chr20	40244770	40244771	CHD6	84181	2361	CGI-N-Shore	FALSE	TRUE	FALSE
cg00527653	chr10	72574724	72574725	SGPL1	8879	-978	CGI-N-Shore	TRUE	FALSE	FALSE
cg00538888	chr10	129703001	129703002	PTPRE	5791	-2322	CGI-N-Shelf	FALSE	FALSE	TRUE
cg00539094	chr1	26824733	26824734	HMGN2	3151	25830	CGI-N-Shore	FALSE	FALSE	TRUE
cg00541303	chr1	208962374	208962375	PLXNA2	5362	-544708	Non-CGI	FALSE	FALSE	TRUE
cg00543723	chr11	45715523	45715524	CHST1	8534	-28316	Non-CGI	TRUE	FALSE	FALSE
cg00545232	chr13	93923232	93923233	GPC6	10082	44153	Non-CGI	FALSE	TRUE	FALSE
cg00547068	chr5	169404742	169404743	FAM196B	100131897	3000	Non-CGI	FALSE	TRUE	FALSE
cg00564465	chr8	61083352	61083353	CA8	767	110600	CGI-N-Shelf	FALSE	FALSE	TRUE
cg00595237	chr8	11560763	11560764	GATA4	2626	26294	CGI	TRUE	TRUE	FALSE
cg00599163	chr2	162100495	162100496	PSMD14	10213	-64289	CGI-N-Shore	TRUE	FALSE	FALSE
cg00604736	chr12	50366624	50366625	AQP6	363	5646	Non-CGI	TRUE	TRUE	FALSE
cg00604859	chr17	43247290	43247291	HEXIM2	124790	9025	CGI-S-Shore	FALSE	TRUE	FALSE
cg00618865	chr3	129324699	129324700	PLXND1	23129	881	CGI	TRUE	FALSE	FALSE
cg00620976	chr16	65612895	65612896	LOC283867	283867	-2691	Non-CGI	FALSE	FALSE	TRUE
cg00622105	chr2	65594478	65594479	SPRED2	200734	65176	Non-CGI	TRUE	TRUE	FALSE
cg00634573	chr17	953069	953070	MIR3183	100422835	-27269	CGI-S-Shore	FALSE	TRUE	FALSE
cg00635343	chr18	5193969	5193970	C18orf42	642597	3284	CGI-N-Shelf	FALSE	TRUE	FALSE
cg00640087	chr6	31707202	31707203	MSH5-SAPCD1	100532732	-521	CGI-N-Shore	TRUE	FALSE	FALSE
cg00647741	chr19	58693450	58693451	ZNF274	10782	-944	CGI-N-Shore	TRUE	FALSE	FALSE
cg00647879	chr7	2088756	2088757	MAD1L1	8379	183825	CGI-N-Shore	FALSE	TRUE	FALSE
cg00652274	chr3	115576803	115576804	GAP43	2596	234651	Non-CGI	FALSE	TRUE	FALSE
cg00652846	chr3	112934087	112934088	BOC	91653	3674	CGI-S-Shelf	TRUE	TRUE	FALSE
cg00658979	chr17	70111635	70111636	SOX9	6662	-5524	CGI-N-Shore	FALSE	TRUE	FALSE
cg00662956	chr3	185829300	185829301	ETV5	2119	-2398	CGI-S-Shore	FALSE	FALSE	TRUE
cg00664743	chr22	31300253	31300254	MORC2-AS1	150291	-18040	CGI-N-Shore	FALSE	TRUE	FALSE
cg00665374	chr6	131602870	131602871	AKAP7	9465	146043	Non-CGI	FALSE	TRUE	FALSE
cg00666849	chr2	85839032	85839033	C2orf68	388969	145	CGI	TRUE	TRUE	FALSE
cg00685622	chr16	85373209	85373210	LOC727710	727710	-36206	CGI	FALSE	FALSE	TRUE
cg00688941	chr8	39898391	39898392	IDO2	169355	105916	Non-CGI	FALSE	FALSE	TRUE
cg00689492	chr4	1303491	1303492	MAEA	10296	19818	CGI	TRUE	TRUE	FALSE
cg00691729	chr17	58468300	58468301	USP32	84669	1284	CGI-N-Shore	FALSE	TRUE	FALSE
cg00700389	chr20	62091149	62091150	KCNQ2	3785	12842	CGI-S-Shore	FALSE	TRUE	FALSE
cg00707814	chr12	121893668	121893669	RNF34	80196	55765	CGI	FALSE	TRUE	FALSE
cg00709966	chr7	27253143	27253144	HOTTIP	100316868	13102	CGI	FALSE	FALSE	TRUE
cg00712627	chr10	80588621	80588622	ZMIZ1-AS1	283050	239913	CGI-N-Shore	FALSE	FALSE	TRUE
cg00713294	chr1	55678649	55678650	USP24	23358	2388	CGI-N-Shore	FALSE	TRUE	FALSE
cg00715124	chr6	3227026	3227027	TUBB2B	347733	940	CGI-S-Shore	TRUE	TRUE	FALSE
cg00725388	chr3	4508494	4508495	SUMF1	285362	470	CGI-N-Shore	FALSE	TRUE	FALSE
cg00725778	chr6	157975390	157975391	MIR3692	100500899	25225	Non-CGI	FALSE	TRUE	FALSE
cg00731886	chr4	1363008	1363009	UVSSA	57654	21903	CGI-S-Shore	FALSE	TRUE	FALSE
cg00733728	chr13	79171230	79171231	POU4F1	5457	6463	CGI-S-Shore	FALSE	TRUE	FALSE
cg00743094	chr13	100547968	100547969	ZIC5	85416	76208	CGI-S-Shore	FALSE	TRUE	FALSE
cg00749323	chr19	22014817	22014818	ZNF43	7594	20011	CGI-N-Shelf	FALSE	TRUE	FALSE
cg00752480	chr2	62680940	62680941	TMEM17	200728	81838	CGI-N-Shelf	FALSE	FALSE	TRUE
cg00754357	chr1	53019727	53019728	ZCCHC11	23318	-596	CGI-S-Shore	TRUE	FALSE	FALSE
cg00758533	chr17	656901	656902	DBIL5P	100131454	1000	CGI-S-Shore	TRUE	FALSE	FALSE
cg00761125	chr12	96590115	96590116	ELK3	2004	1907	CGI-S-Shore	FALSE	TRUE	FALSE
cg00762662	chr10	23727572	23727573	OTUD1	220213	-624	CGI-N-Shore	TRUE	FALSE	FALSE
cg00766188	chr15	89953370	89953371	LOC254559	254559	42039	CGI	FALSE	FALSE	TRUE
cg00773359	chr7	805214	805215	PRKAR1B	5575	-37900	CGI-S-Shore	FALSE	TRUE	FALSE
cg00778993	chr6	170228377	170228378	LINC00242	401288	-29455	CGI-N-Shelf	FALSE	FALSE	TRUE
cg00779065	chr14	61119218	61119219	SIX1	6495	-3062	CGI	FALSE	FALSE	TRUE
cg00779638	chr9	88355164	88355165	AGTPBP1	23287	1778	CGI-N-Shore	FALSE	TRUE	FALSE
cg00784105	chr1	19636065	19636066	AKR7A2	8574	2573	CGI-N-Shelf	FALSE	TRUE	FALSE
cg00787013	chr10	125665208	125665209	CPXM2	119587	34569	Non-CGI	FALSE	TRUE	FALSE
cg00788521	chr12	2229269	2229270	CACNA1C	775	66852	Non-CGI	TRUE	TRUE	FALSE
cg00804073	chr14	59704022	59704023	DAAM1	23002	48622	Non-CGI	FALSE	TRUE	FALSE
cg00806634	chr5	11383489	11383490	CTNND2	1501	520619	CGI-N-Shore	FALSE	TRUE	FALSE
cg00807959	chr1	48176281	48176282	FOXD2	2306	274591	CGI	FALSE	FALSE	TRUE
cg00821587	chr10	135008729	135008730	KNDC1	85442	34757	CGI	TRUE	TRUE	FALSE
cg00822898	chr4	3436168	3436169	HGFAC	3083	-7556	CGI-N-Shore	FALSE	TRUE	FALSE
cg00825951	chr1	44871429	44871430	RNF220	55182	468	CGI	FALSE	TRUE	FALSE
cg00827989	chr2	175201542	175201543	SP9	100131390	1720	CGI	FALSE	TRUE	FALSE
cg00837677	chr10	48372681	48372682	ZNF488	118738	17591	Non-CGI	FALSE	TRUE	FALSE
cg00850068	chr19	8428494	8428495	ANGPTL4	51129	-515	CGI-N-Shore	TRUE	FALSE	FALSE
cg00857435	chr7	90932279	90932280	FZD1	8321	38495	Non-CGI	FALSE	FALSE	TRUE
cg00860225	chr17	27313157	27313158	SEZ6	124925	20299	CGI-S-Shore	FALSE	TRUE	FALSE
cg00864530	chr14	38371922	38371923	SSTR1	6751	-305280	Non-CGI	TRUE	TRUE	FALSE
cg00864867	chr12	80085268	80085269	PAWR	5074	-477	CGI-S-Shore	TRUE	FALSE	FALSE
cg00873533	chr14	105292332	105292333	LINC00638	196872	4793	CGI-N-Shore	FALSE	FALSE	TRUE
cg00875989	chr18	44774054	44774055	IER3IP1	51124	-71308	CGI	FALSE	TRUE	FALSE
cg00878605	chr19	17716645	17716646	COLGALT1	79709	50133	CGI-N-Shore	FALSE	TRUE	FALSE
cg00885365	chr2	215702120	215702121	BARD1	580	-27691	CGI-S-Shore	FALSE	FALSE	TRUE
cg00887814	chr4	141419276	141419277	ELMOD2	255520	-26034	CGI	FALSE	TRUE	FALSE
cg00889398	chr13	28502089	28502090	PDX1	3651	7920	CGI	FALSE	FALSE	TRUE
cg00892255	chr14	51243177	51243178	NIN	51199	54660	Non-CGI	FALSE	TRUE	FALSE
cg00896193	chr16	81529947	81529948	CMIP	80790	51171	CGI-S-Shelf	FALSE	TRUE	FALSE
cg00909646	chr8	67874250	67874251	TCF24	100129654	573	CGI	FALSE	TRUE	FALSE
cg00917569	chr16	51187388	51187389	SALL1	6299	-2204	CGI-S-Shore	FALSE	FALSE	TRUE
cg00919689	chr7	2082255	2082256	MAD1L1	8379	190326	CGI	FALSE	TRUE	FALSE
cg00922825	chr10	98946790	98946791	SLIT1	6585	-1106	CGI	TRUE	TRUE	FALSE
cg00926267	chr22	41030561	41030562	MKL1	57591	2127	CGI-N-Shore	FALSE	TRUE	FALSE
cg00927231	chr16	4357579	4357580	GLIS2	84662	-24635	CGI	FALSE	FALSE	TRUE
cg00927554	chr12	95941920	95941921	USP44	84101	3341	CGI-N-Shore	TRUE	TRUE	FALSE
cg00931944	chr8	1310046	1310047	LOC286083	286083	-59218	CGI	FALSE	FALSE	TRUE
cg00933542	chr6	150070202	150070203	PCMT1	5110	-627	CGI	TRUE	FALSE	FALSE
cg00935307	chr4	1581921	1581922	FAM53A	152877	104065	CGI-S-Shore	FALSE	FALSE	TRUE
cg00938087	chr17	63186926	63186927	RGS9	8787	53469	Non-CGI	FALSE	TRUE	FALSE
cg00944580	chr1	58333307	58333308	OMA1	115209	679137	Non-CGI	FALSE	TRUE	FALSE
cg00952822	chr8	144571936	144571937	ZC3H3	23144	51682	CGI-S-Shore	FALSE	TRUE	FALSE
cg00954841	chr12	3373534	3373535	PRMT8	56341	-116979	CGI	FALSE	TRUE	FALSE
cg00955482	chr18	712737	712738	ENOSF1	55556	-74	CGI	TRUE	FALSE	FALSE
cg00956423	chr6	30029760	30029761	ZNRD1-AS1	80862	-342	CGI-S-Shore	TRUE	TRUE	FALSE
cg00958100	chr1	88763257	88763258	PKN2	5586	-386663	Non-CGI	FALSE	FALSE	TRUE
cg00960395	chr17	46799948	46799949	PRAC	84366	-65	CGI-S-Shore	TRUE	FALSE	FALSE
cg00962755	chr1	201439001	201439002	PHLDA3	23612	-701	CGI	TRUE	FALSE	FALSE
cg00962793	chr14	104852641	104852642	C14orf180	400258	-193413	CGI-S-Shore	FALSE	FALSE	TRUE
cg00963675	chr10	64572581	64572582	EGR2	1959	6344	CGI-N-Shore	FALSE	TRUE	FALSE
cg00970361	chr15	60288348	60288349	FOXB1	27023	-8071	CGI	FALSE	FALSE	TRUE
cg00980625	chr18	56889548	56889549	GRP	2922	2147	CGI-S-Shore	FALSE	TRUE	FALSE
cg00984060	chr22	40081520	40081521	CACNA1I	8911	114761	CGI-N-Shore	FALSE	TRUE	FALSE
cg00988227	chr5	40693569	40693570	PTGER4	5734	13536	Non-CGI	FALSE	TRUE	FALSE
cg00991848	chr16	2014270	2014271	RPS2	6187	555	CGI	TRUE	TRUE	FALSE
cg00993118	chr5	50683215	50683216	ISL1	3670	4256	CGI-N-Shore	FALSE	TRUE	FALSE
cg01007374	chr21	47392916	47392917	COL6A1	1291	-8745	CGI	FALSE	FALSE	TRUE
cg01007458	chr19	15084527	15084528	OR7C2	26658	32225	CGI-S-Shore	TRUE	TRUE	FALSE
cg01017397	chr7	955497	955498	ADAP1	11033	59736	CGI	FALSE	TRUE	FALSE
cg01019262	chr1	155095195	155095196	EFNA1	1942	-5152	CGI-N-Shelf	FALSE	FALSE	TRUE
cg01024168	chr7	27209281	27209282	MIR196B	442920	-98	CGI	TRUE	TRUE	FALSE
cg01040533	chr10	71339886	71339887	NEUROG3	50674	-6675	CGI-S-Shore	FALSE	FALSE	TRUE
cg01047631	chr16	54972573	54972574	IRX5	10265	7461	CGI	FALSE	FALSE	TRUE
cg01056004	chr10	98948259	98948260	SLIT1	6585	-2575	CGI-S-Shore	FALSE	TRUE	FALSE
cg01063509	chr1	20502234	20502235	PLA2G2C	391013	-546	Non-CGI	TRUE	FALSE	FALSE
cg01071511	chr7	2052474	2052475	MIR4655	100616160	-168584	CGI-S-Shore	FALSE	TRUE	FALSE
cg01075805	chr15	60298519	60298520	FOXB1	27023	2097	CGI	FALSE	TRUE	FALSE
cg01082422	chr5	179224751	179224752	MIR1229	100302156	593	CGI	FALSE	TRUE	FALSE
cg01083148	chr7	105705154	105705155	SYPL1	6856	47901	Non-CGI	FALSE	FALSE	TRUE
cg01085837	chr12	22094461	22094462	ABCC9	10060	-124	CGI-S-Shore	TRUE	FALSE	FALSE
cg01093363	chr6	30139991	30139992	TRIM15	89870	9007	CGI	FALSE	TRUE	FALSE
cg01097102	chr1	63151692	63151693	DOCK7	85440	2275	CGI-N-Shore	FALSE	TRUE	FALSE
cg01099150	chr2	8746519	8746520	ID2	3398	-75592	Non-CGI	FALSE	FALSE	TRUE
cg01099300	chr10	101779926	101779927	DNMBP	23268	-10249	Non-CGI	FALSE	FALSE	TRUE
cg01105427	chr4	8593507	8593508	CPZ	8532	11289	CGI-N-Shore	TRUE	TRUE	FALSE
cg01109047	chr2	120979401	120979402	TMEM185B	79134	1581	CGI-N-Shore	TRUE	FALSE	FALSE
cg01121554	chr19	23253797	23253798	ZNF724P	440519	179373	CGI-S-Shore	FALSE	FALSE	TRUE
cg01121892	chr8	144294486	144294487	GPIHBP1	338328	-580	CGI-S-Shore	TRUE	FALSE	FALSE
cg01129004	chr7	64349155	64349156	ZNF273	10793	6283	CGI	FALSE	TRUE	FALSE
cg01132056	chr4	178170788	178170789	NEIL3	55247	-60201	Non-CGI	FALSE	FALSE	TRUE
cg01138673	chr5	14159230	14159231	TRIO	7204	15400	Non-CGI	FALSE	TRUE	FALSE
cg01145317	chr16	86542838	86542839	FENDRR	400550	-371	CGI	TRUE	FALSE	FALSE
cg01146232	chr16	51185147	51185148	SALL1	6299	34	CGI-S-Shore	TRUE	FALSE	FALSE
cg01153166	chr15	96874702	96874703	MIR1469	100302258	-1786	CGI	TRUE	TRUE	FALSE
cg01158822	chr6	10415201	10415202	LOC100130275	100130275	2649	CGI	TRUE	TRUE	FALSE
cg01165159	chr4	148787393	148787394	MIR4799	100616246	83646	Non-CGI	FALSE	TRUE	FALSE
cg01166399	chr6	119346816	119346817	MIR548B	693128	43490	Non-CGI	FALSE	TRUE	FALSE
cg01175767	chr1	112283245	112283246	LOC100506343	100506343	781	CGI-S-Shore	TRUE	TRUE	FALSE
cg01176823	chr2	217540577	217540578	IGFBP5	3488	19693	Non-CGI	FALSE	TRUE	FALSE
cg01176947	chr6	10385279	10385280	LOC100130275	100130275	-27270	CGI-S-Shore	FALSE	FALSE	TRUE
cg01179986	chr1	249152877	249152878	ZNF692	55657	436	CGI	TRUE	TRUE	FALSE
cg01181817	chr3	49941376	49941377	MST1R	4486	-69	CGI	TRUE	FALSE	FALSE
cg01185433	chr4	175139081	175139082	CEP44	80817	-65745	CGI	FALSE	TRUE	FALSE
cg01193554	chr1	41846683	41846684	EDN2	1907	103659	CGI-N-Shore	FALSE	FALSE	TRUE
cg01194674	chr6	33153191	33153192	COL11A2	1302	7052	Non-CGI	FALSE	TRUE	FALSE
cg01196788	chr2	19561709	19561710	OSR1	130497	-3336	CGI	FALSE	FALSE	TRUE
cg01204060	chr20	4227342	4227343	ADRA1D	146	2315	CGI-N-Shore	FALSE	TRUE	FALSE
cg01212373	chr14	38674559	38674560	SSTR1	6751	-2643	CGI-N-Shelf	FALSE	FALSE	TRUE
cg01216882	chr20	31804277	31804278	BPIFA3	128861	-856	Non-CGI	TRUE	FALSE	FALSE
cg01217984	chr7	27143235	27143236	HOXA2	3199	-840	CGI-S-Shore	TRUE	FALSE	FALSE
cg01218350	chr2	210517441	210517442	UNC80	285175	-119274	Non-CGI	TRUE	TRUE	FALSE
cg01221018	chr14	24684670	24684671	MDP1	145553	604	CGI-S-Shore	TRUE	TRUE	FALSE
cg01226417	chr14	78443517	78443518	ADCK1	57143	177090	CGI-N-Shelf	FALSE	FALSE	TRUE
cg01229943	chr6	40904807	40904808	TSPO2	222642	-105428	Non-CGI	FALSE	FALSE	TRUE
cg01234044	chr7	1277585	1277586	UNCX	340260	4930	CGI	FALSE	FALSE	TRUE
cg01235983	chr1	32669150	32669151	IQCC	55721	-2084	CGI-N-Shore	FALSE	TRUE	FALSE
cg01236132	chr13	112723581	112723582	SOX1	6656	1667	CGI	TRUE	FALSE	FALSE
cg01259423	chr2	9533573	9533574	ITGB1BP1	9270	30068	CGI-S-Shelf	FALSE	TRUE	FALSE
cg01267797	chr5	79542470	79542471	SERINC5	256987	9426	Non-CGI	FALSE	TRUE	FALSE
cg01273330	chr2	28605224	28605225	FOSL2	2355	-10443	Non-CGI	FALSE	FALSE	TRUE
cg01277372	chr3	169378764	169378765	MECOM	2122	2797	CGI	FALSE	TRUE	FALSE
cg01287975	chr7	97361241	97361242	TAC1	6863	-28	CGI	TRUE	FALSE	FALSE
cg01290568	chr2	113593859	113593860	IL1B	3553	495	Non-CGI	TRUE	TRUE	FALSE
cg01299332	chr5	79406275	79406276	THBS4	7060	75104	CGI-N-Shore	FALSE	FALSE	TRUE
cg01301197	chr2	109646612	109646613	EDAR	10913	-40783	CGI-N-Shore	FALSE	FALSE	TRUE
cg01305736	chr17	40831891	40831892	CCR10	2826	1952	CGI	FALSE	TRUE	FALSE
cg01306747	chr16	68681018	68681019	CDH3	1001	2866	CGI-S-Shore	FALSE	TRUE	FALSE
cg01308268	chr10	135132212	135132213	TUBGCP2	10844	-6370	CGI	FALSE	TRUE	FALSE
cg01313313	chr5	43040590	43040591	ANXA2R	389289	-142	CGI	TRUE	FALSE	FALSE
cg01315092	chr2	120980375	120980376	TMEM185B	79134	607	CGI	TRUE	FALSE	FALSE
cg01315916	chr5	3591609	3591610	IRX1	79192	-4557	CGI	FALSE	FALSE	TRUE
cg01320130	chr1	67600311	67600312	C1orf141	400757	340	CGI-S-Shore	FALSE	TRUE	FALSE
cg01329687	chr16	11761803	11761804	SNN	8303	-484	CGI	TRUE	FALSE	FALSE
cg01332342	chr2	70350820	70350821	LOC100133985	100133985	1626	CGI-N-Shore	FALSE	FALSE	TRUE
cg01333706	chr8	1104210	1104211	LOC286083	286083	146615	CGI-N-Shore	FALSE	FALSE	TRUE
cg01338705	chr6	157368215	157368216	MIR4466	100616154	-267349	Non-CGI	FALSE	TRUE	FALSE
cg01340005	chr3	181429460	181429461	SOX2	6657	-250	CGI-S-Shore	TRUE	TRUE	FALSE
cg01344171	chr6	43612647	43612648	RSPH9	221421	-118	CGI-S-Shore	TRUE	FALSE	FALSE
cg01349034	chr10	48660050	48660051	PTPN20B	26095	167872	Non-CGI	FALSE	FALSE	TRUE
cg01350190	chr22	33196504	33196505	TIMP3	7078	-296	CGI-N-Shore	TRUE	TRUE	FALSE
cg01369207	chr2	45484726	45484727	UNQ6975	400952	-2645	Non-CGI	FALSE	FALSE	TRUE
cg01388649	chr17	46810768	46810769	HOXB13	10481	-4656	CGI	FALSE	FALSE	TRUE
cg01396872	chr2	71294879	71294880	NAGK	55577	-527	CGI-N-Shore	TRUE	FALSE	FALSE
cg01400685	chr11	61598025	61598026	FADS1	3992	-13495	CGI-S-Shore	FALSE	TRUE	FALSE
cg01400737	chr5	92179430	92179431	FLJ42709	441094	737571	Non-CGI	FALSE	FALSE	TRUE
cg01405093	chr6	4952524	4952525	RPP40	10799	51745	CGI	FALSE	TRUE	FALSE
cg01405985	chr19	36345675	36345676	KIRREL2	84063	-2133	CGI-N-Shore	FALSE	FALSE	TRUE
cg01406381	chr19	47288263	47288264	SLC1A5	6510	3577	CGI-N-Shelf	TRUE	TRUE	FALSE
cg01408881	chr12	65566249	65566250	LEMD3	23592	2897	CGI-S-Shore	FALSE	TRUE	FALSE
cg01428687	chr3	10157025	10157026	BRK1	55845	-306	CGI-N-Shore	TRUE	FALSE	FALSE
cg01431063	chr10	115860903	115860904	ADRB1	153	57096	CGI	FALSE	FALSE	TRUE
cg01432620	chr13	100636183	100636184	ZIC2	7546	2156	CGI	FALSE	TRUE	FALSE
cg01433332	chr16	85407575	85407576	LOC727710	727710	-70572	CGI	FALSE	FALSE	TRUE
cg01436998	chr19	38308263	38308264	LOC644554	644554	211	CGI	TRUE	FALSE	FALSE
cg01442601	chr14	102030727	102030728	DIO3	1735	3038	CGI	FALSE	FALSE	TRUE
cg01443426	chr22	38201594	38201595	H1F0	3005	479	CGI	TRUE	FALSE	FALSE
cg01446798	chr6	100911240	100911241	SIM1	6492	1563	CGI-S-Shore	TRUE	TRUE	FALSE
cg01447475	chr2	30510887	30510888	LBH	81606	56489	Non-CGI	FALSE	FALSE	TRUE
cg01450896	chr16	1041686	1041687	SOX8	30812	9877	CGI-S-Shore	FALSE	FALSE	TRUE
cg01461824	chr17	46816286	46816287	HOXB13	10481	-10174	CGI	FALSE	FALSE	TRUE
cg01461840	chr10	130085088	130085089	MKI67	4288	-160619	CGI	FALSE	TRUE	FALSE
cg01464748	chr10	45922877	45922878	ALOX5	240	53247	CGI-N-Shore	FALSE	TRUE	FALSE
cg01465596	chr1	42381916	42381917	HIVEP3	59269	119678	CGI-N-Shore	FALSE	TRUE	FALSE
cg01472299	chr6	4775063	4775064	CDYL	9425	68669	CGI	TRUE	TRUE	FALSE
cg01476569	chr16	81069244	81069245	ATMIN	23300	-212	CGI-N-Shore	TRUE	FALSE	FALSE
cg01485549	chr16	53789485	53789486	FTO	79068	51609	Non-CGI	FALSE	TRUE	FALSE
cg01486146	chr10	102415311	102415312	PAX2	5076	-90155	CGI	FALSE	FALSE	TRUE
cg01496380	chr19	763654	763655	C19orf21	126353	12507	Non-CGI	FALSE	TRUE	FALSE
cg01499408	chr17	42921108	42921109	HIGD1B	51751	-4169	Non-CGI	FALSE	FALSE	TRUE
cg01503065	chr4	155411806	155411807	DCHS2	54798	1122	CGI	TRUE	FALSE	FALSE
cg01513392	chr20	21488198	21488199	NKX2-2	4821	6464	CGI	FALSE	FALSE	TRUE
cg01515136	chr1	1229589	1229590	SCNN1D	6339	13772	CGI	FALSE	TRUE	FALSE
cg01527441	chr19	30195815	30195816	C19orf12	83636	10635	CGI-S-Shelf	FALSE	TRUE	FALSE
cg01527581	chr8	1475228	1475229	DLGAP2	9228	25658	CGI	FALSE	TRUE	FALSE
cg01533258	chr14	95235489	95235490	GSC	145258	1008	CGI	FALSE	TRUE	FALSE
cg01534416	chr19	51308546	51308547	C19orf48	84798	-571	CGI-S-Shore	TRUE	FALSE	FALSE
cg01538165	chr8	71240128	71240129	NCOA2	10499	75890	Non-CGI	FALSE	TRUE	FALSE
cg01543654	chr17	46800639	46800640	HOXB-AS5	360205	96	CGI	TRUE	FALSE	FALSE
cg01553004	chr14	77495672	77495673	IRF2BPL	64207	-637	CGI	TRUE	FALSE	FALSE
cg01557798	chr1	228400628	228400629	OBSCN	84033	4766	CGI	FALSE	TRUE	FALSE
cg01560407	chr16	310537	310538	RGS11	8786	15375	CGI-N-Shore	FALSE	TRUE	FALSE
cg01570265	chr14	70180751	70180752	SRSF5	6430	-12866	Non-CGI	FALSE	TRUE	FALSE
cg01574564	chr7	115851459	115851460	TES	26136	911	CGI	TRUE	TRUE	FALSE
cg01591227	chr11	62538535	62538536	TAF6L	10629	-238	CGI	TRUE	FALSE	FALSE
cg01595717	chr9	140586201	140586202	FLJ40292	643210	-71271	CGI-N-Shore	FALSE	TRUE	FALSE
cg01596834	chr3	183993711	183993712	CAMK2N2	94032	-14459	CGI	TRUE	TRUE	FALSE
cg01603862	chr8	1041336	1041337	LOC286083	286083	209489	CGI	FALSE	TRUE	FALSE
cg01604009	chr2	67102333	67102334	LOC644838	644838	340116	Non-CGI	FALSE	FALSE	TRUE
cg01605366	chr11	106255565	106255566	KBTBD3	143879	-307099	Non-CGI	FALSE	FALSE	TRUE
cg01614041	chr6	34123414	34123415	GRM4	2914	-9544	CGI-S-Shore	FALSE	FALSE	TRUE
cg01628509	chr20	62106712	62106713	KCNQ2	3785	-2718	CGI	FALSE	FALSE	TRUE
cg01635193	chr17	42092472	42092473	TMEM101	84336	-56	CGI-S-Shore	TRUE	FALSE	FALSE
cg01635405	chr10	124896713	124896714	HMX3	340784	1145	CGI	FALSE	TRUE	FALSE
cg01638311	chr11	65887103	65887104	PACS1	55690	49278	Non-CGI	FALSE	TRUE	FALSE
cg01639032	chr6	31783029	31783030	HSPA1A	3303	-260	CGI	TRUE	TRUE	FALSE
cg01644850	chr19	58193231	58193232	ZNF776	284309	-124	CGI	TRUE	FALSE	FALSE
cg01658421	chr2	176945899	176945900	EVX2	344191	2789	CGI	FALSE	TRUE	FALSE
cg01664014	chr4	152887836	152887837	PET112	5188	-205660	Non-CGI	FALSE	TRUE	FALSE
cg01664382	chr6	170490375	170490376	LOC154449	154449	81280	CGI	FALSE	FALSE	TRUE
cg01667185	chr11	66625638	66625639	LRFN4	78999	761	CGI	TRUE	TRUE	FALSE
cg01667702	chr17	7836604	7836605	CNTROB	116840	1161	CGI-S-Shore	TRUE	TRUE	FALSE
cg01682784	chr12	131142360	131142361	RIMBP2	23504	58464	CGI	FALSE	TRUE	FALSE
cg01688688	chr5	140614000	140614001	PCDHB18	54660	61	CGI	TRUE	FALSE	FALSE
cg01689404	chr17	35423942	35423943	MIR2909	100422969	32899	CGI	FALSE	FALSE	TRUE
cg01692252	chr17	37893005	37893006	GRB7	2886	-1155	CGI-N-Shore	TRUE	FALSE	FALSE
cg01700003	chr12	49730800	49730801	C1QL4	338761	169	CGI	TRUE	FALSE	FALSE
cg01704860	chr6	30550855	30550856	MIR877	100126314	-1252	Non-CGI	TRUE	TRUE	FALSE
cg01710886	chr4	2819707	2819708	SH3BP2	6452	24956	CGI	TRUE	TRUE	FALSE
cg01711746	chr3	138657291	138657292	FOXL2	668	8689	CGI	FALSE	TRUE	FALSE
cg01719210	chr2	71128191	71128192	VAX2	25806	470	CGI-S-Shore	FALSE	TRUE	FALSE
cg01719904	chr3	26410290	26410291	LRRC3B	116135	-254008	Non-CGI	FALSE	FALSE	TRUE
cg01721149	chr1	156394727	156394728	MIR9-1	407046	-4505	CGI-S-Shelf	FALSE	TRUE	FALSE
cg01724683	chr17	75180961	75180962	SCARNA16	677781	95571	Non-CGI	TRUE	TRUE	FALSE
cg01730064	chr1	235362916	235362917	MIR4753	100616224	-9484	Non-CGI	FALSE	TRUE	FALSE
cg01731355	chr7	158103582	158103583	MIR595	693180	221921	CGI	FALSE	TRUE	FALSE
cg01734698	chr2	217164034	217164035	2004-03-01	57574	72714	Non-CGI	FALSE	TRUE	FALSE
cg01752203	chr2	15948462	15948463	MYCN	4613	-132219	CGI	FALSE	FALSE	TRUE
cg01753544	chr11	64509592	64509593	RASGRP2	10235	3334	CGI	TRUE	TRUE	FALSE
cg01757312	chr13	112720565	112720566	SOX1	6656	-1346	CGI	TRUE	FALSE	FALSE
cg01758041	chr7	99686291	99686292	COPS6	10980	-290	CGI-N-Shore	TRUE	FALSE	FALSE
cg01758899	chr16	66583237	66583238	TK2	7084	1076	CGI-N-Shore	TRUE	TRUE	FALSE
cg01763090	chr15	31775406	31775407	KLF13	51621	156322	CGI	FALSE	TRUE	FALSE
cg01764808	chr1	145033094	145033095	LOC653513	653513	6896	Non-CGI	FALSE	TRUE	FALSE
cg01767599	chr6	88871927	88871928	CNR1	1268	3838	CGI-N-Shelf	FALSE	TRUE	FALSE
cg01768926	chr18	32820085	32820086	ZNF397	84307	-907	CGI-N-Shore	TRUE	FALSE	FALSE
cg01770755	chr15	41914122	41914123	MGA	23269	357	CGI	FALSE	TRUE	FALSE
cg01782024	chr1	91989267	91989268	CDC7	8317	22862	Non-CGI	FALSE	TRUE	FALSE
cg01786715	chr14	65007437	65007438	HSPA2	3306	250	CGI	TRUE	TRUE	FALSE
cg01790894	chr2	223162692	223162693	CCDC140	151278	-172	CGI-S-Shore	TRUE	TRUE	FALSE
cg01794426	chr14	37132490	37132491	PAX9	5083	5716	CGI	FALSE	TRUE	FALSE
cg01801191	chr16	83992318	83992319	OSGIN1	29948	9262	CGI	FALSE	TRUE	FALSE
cg01803856	chr17	650796	650797	GEMIN4	50628	4703	CGI-S-Shore	FALSE	TRUE	FALSE
cg01806921	chr22	28011160	28011161	MN1	4330	186324	CGI-S-Shore	FALSE	FALSE	TRUE
cg01810111	chr6	27637395	27637396	LOC100507173	100507173	-24417	CGI	FALSE	FALSE	TRUE
cg01811325	chr10	131757672	131757673	EBF3	253738	4417	CGI	FALSE	TRUE	FALSE
cg01815538	chr6	100054615	100054616	PRDM13	59336	-33	CGI	TRUE	FALSE	FALSE
cg01818151	chr17	46797042	46797043	PRAC	84366	2838	CGI-S-Shore	FALSE	FALSE	TRUE
cg01820317	chr4	40049006	40049007	N4BP2	55728	-9516	CGI-S-Shelf	FALSE	TRUE	FALSE
cg01824969	chr8	67875261	67875262	TCF24	100129654	-435	CGI	TRUE	FALSE	FALSE
cg01826117	chr16	85181279	85181280	LOC400548	400548	10522	CGI	FALSE	TRUE	FALSE
cg01829002	chr5	50259133	50259134	PARP8	79668	297399	CGI	FALSE	FALSE	TRUE
cg01830002	chr1	201032807	201032808	KIF21B	23046	-39978	Non-CGI	FALSE	TRUE	FALSE
cg01839860	chr5	138957422	138957423	UBE2D2	7322	16670	Non-CGI	FALSE	TRUE	FALSE
cg01844642	chr3	51989764	51989765	GPR62	118442	433	CGI-N-Shore	TRUE	FALSE	FALSE
cg01847271	chr9	116111676	116111677	BSPRY	54836	-134	CGI-N-Shore	TRUE	FALSE	FALSE
cg01851378	chr16	51186925	51186926	SALL1	6299	-1741	CGI	TRUE	FALSE	FALSE
cg01852585	chr4	106817015	106817016	NPNT	255743	417	CGI	FALSE	TRUE	FALSE
cg01854499	chr8	102054564	102054565	FLJ42969	441374	-9716	Non-CGI	FALSE	FALSE	TRUE
cg01860010	chr3	196726298	196726299	MFI2-AS1	100507057	-3477	CGI-N-Shelf	FALSE	FALSE	TRUE
cg01863290	chr14	96730669	96730670	BDKRB1	623	8121	CGI	TRUE	TRUE	FALSE
cg01864564	chr1	152488269	152488270	CRCT1	54544	1290	CGI	FALSE	TRUE	FALSE
cg01866770	chr22	40079107	40079108	CACNA1I	8911	112348	CGI-S-Shelf	FALSE	TRUE	FALSE
cg01868782	chr6	126071099	126071100	HEY2	23493	2318	CGI	TRUE	TRUE	FALSE
cg01879473	chr2	223160102	223160103	CCDC140	151278	-2762	CGI	FALSE	TRUE	FALSE
cg01880463	chr20	45179413	45179414	OCSTAMP	128506	-199	Non-CGI	TRUE	FALSE	FALSE
cg01883777	chr22	38201848	38201849	H1F0	3005	733	CGI-S-Shore	TRUE	FALSE	FALSE
cg01883989	chr2	208019901	208019902	KLF7	8609	11668	Non-CGI	FALSE	TRUE	FALSE
cg01892516	chr14	38064532	38064533	FOXA1	3169	-42	CGI-S-Shore	TRUE	FALSE	FALSE
cg01906905	chr1	41844038	41844039	EDN2	1907	106304	CGI-N-Shelf	FALSE	FALSE	TRUE
cg01912040	chr17	1106553	1106554	ABR	29	-15936	CGI-S-Shore	FALSE	FALSE	TRUE
cg01917340	chr14	90720130	90720131	PSMC1	5700	-2762	CGI-N-Shelf	FALSE	FALSE	TRUE
cg01918001	chr12	13687295	13687296	C12orf36	283422	-157615	Non-CGI	FALSE	FALSE	TRUE
cg01929377	chr13	37634127	37634128	SUPT20H	55578	-276	CGI-S-Shore	TRUE	FALSE	FALSE
cg01931883	chr1	201561164	201561165	NAV1	89796	-56284	Non-CGI	FALSE	FALSE	TRUE
cg01936707	chr6	30860905	30860906	MIR4640	100616237	2244	Non-CGI	FALSE	TRUE	FALSE
cg01937247	chr1	1229534	1229535	SCNN1D	6339	13717	CGI	FALSE	TRUE	FALSE
cg01944226	chr17	80188056	80188057	SLC16A3	9123	1773	CGI-S-Shore	FALSE	TRUE	FALSE
cg01945038	chr1	110141606	110141607	MIR197	406974	90	Non-CGI	FALSE	FALSE	TRUE
cg01947224	chr19	58089885	58089886	ZNF416	55659	356	CGI	FALSE	TRUE	FALSE
cg01948978	chr1	203712327	203712328	SNORA77	677843	13617	Non-CGI	FALSE	TRUE	FALSE
cg01951086	chr4	111551642	111551643	PITX2	5308	11635	CGI-S-Shore	FALSE	TRUE	FALSE
cg01960016	chr5	174152363	174152364	MSX2	4488	787	CGI	FALSE	TRUE	FALSE
cg01961156	chr12	14135228	14135229	GRIN2B	2904	-2205	CGI	FALSE	FALSE	TRUE
cg01968178	chr2	86565038	86565039	REEP1	65055	166	CGI	TRUE	TRUE	FALSE
cg01969473	chr2	102978461	102978462	IL18R1	8809	50498	Non-CGI	TRUE	TRUE	FALSE
cg01971181	chr3	158518888	158518889	MFSD1	64747	-825	CGI-N-Shore	TRUE	FALSE	FALSE
cg01973394	chr15	82335947	82335948	MEX3B	84206	2412	CGI	FALSE	TRUE	FALSE
cg01975495	chr7	100779017	100779018	SERPINE1	5054	8637	Non-CGI	FALSE	TRUE	FALSE
cg01978237	chr6	100896803	100896804	SIM1	6492	16000	CGI	FALSE	TRUE	FALSE
cg01981733	chr7	56297714	56297715	NUPR1L	389493	-113623	CGI-S-Shore	FALSE	FALSE	TRUE
cg01995660	chr13	41238844	41238845	FOXO1	2308	1888	CGI	FALSE	TRUE	FALSE
cg01997884	chr2	224967286	224967287	SERPINE2	5270	-63249	Non-CGI	FALSE	FALSE	TRUE
cg01998047	chr13	30982651	30982652	LINC00426	100188949	-34614	CGI	FALSE	FALSE	TRUE
cg01998606	chr2	145161543	145161544	GTDC1	79712	-71459	Non-CGI	FALSE	TRUE	FALSE
cg02004048	chr6	109868066	109868067	ZBTB24	9841	-63625	Non-CGI	FALSE	TRUE	FALSE
cg02015348	chr2	38831576	38831577	HNRPLL	92906	-1397	CGI-S-Shore	TRUE	FALSE	FALSE
cg02015529	chr13	100153203	100153204	TM9SF2	9375	-523	CGI-S-Shore	TRUE	FALSE	FALSE
cg02017450	chr10	10631670	10631671	SFTA1P	207107	205205	Non-CGI	FALSE	FALSE	TRUE
cg02019508	chr12	53995154	53995155	ATF7	11016	25043	Non-CGI	TRUE	TRUE	FALSE
cg02022224	chr17	39967428	39967429	LEPREL4	10609	1425	CGI	TRUE	TRUE	FALSE
cg02027780	chr11	92526087	92526088	MTNR1B	4544	-176700	Non-CGI	FALSE	TRUE	FALSE
cg02039271	chr3	156008127	156008128	KCNAB1	7881	169789	CGI-N-Shore	TRUE	TRUE	FALSE
cg02039370	chr15	32158966	32158967	OTUD7A	161725	4024	CGI-N-Shelf	FALSE	TRUE	FALSE
cg02049833	chr2	101434611	101434612	NPAS2	4862	-2000	CGI-N-Shore	FALSE	FALSE	TRUE
cg02051771	chr5	140261663	140261664	PCDHA13	56136	-189	CGI-N-Shore	TRUE	TRUE	FALSE
cg02054200	chr6	161563629	161563630	AGPAT4-IT1	79992	19383	CGI	FALSE	TRUE	FALSE
cg02057782	chr13	26042598	26042599	ATP8A2	51761	96388	CGI	TRUE	TRUE	FALSE
cg02060434	chr12	52473014	52473015	C12orf44	60673	9255	CGI-N-Shore	TRUE	FALSE	FALSE
cg02062466	chr12	105712307	105712308	C12orf75	387882	-12105	Non-CGI	FALSE	FALSE	TRUE
cg02067431	chr1	204489016	204489017	MDM4	4194	3508	CGI-S-Shelf	FALSE	TRUE	FALSE
cg02070118	chr4	952128	952129	DGKQ	1609	15214	CGI	FALSE	TRUE	FALSE
cg02078370	chr7	126988120	126988121	ZNF800	168850	44645	CGI	FALSE	FALSE	TRUE
cg02081841	chr10	80590072	80590073	ZMIZ1-AS1	283050	238462	CGI-S-Shore	FALSE	FALSE	TRUE
cg02091185	chr5	170288766	170288767	RANBP17	64901	-128	CGI-N-Shore	TRUE	FALSE	FALSE
cg02091716	chr14	60278381	60278382	RTN1	6252	59174	Non-CGI	FALSE	TRUE	FALSE
cg02094042	chr3	38223776	38223777	OXSR1	9943	16749	Non-CGI	FALSE	TRUE	FALSE
cg02098029	chr5	72746867	72746868	BTF3	689	-47381	CGI	FALSE	FALSE	TRUE
cg02105326	chr2	239149142	239149143	HES6	55502	-460	CGI	TRUE	FALSE	FALSE
cg02111032	chr7	20818070	20818071	SP8	221833	8436	CGI	FALSE	FALSE	TRUE
cg02113067	chr11	63977233	63977234	FERMT3	83706	3080	CGI-S-Shelf	FALSE	TRUE	FALSE
cg02113214	chr7	137410625	137410626	DGKI	9162	120982	Non-CGI	FALSE	TRUE	FALSE
cg02117764	chr3	129289943	129289944	H1FOO	132243	27885	CGI	FALSE	TRUE	FALSE
cg02124524	chr16	85655007	85655008	GSE1	23199	9977	CGI	FALSE	TRUE	FALSE
cg02125365	chr5	78813058	78813059	HOMER1	9456	-3357	CGI-S-Shelf	FALSE	FALSE	TRUE
cg02135122	chr10	76642824	76642825	KAT6B	23522	56444	Non-CGI	FALSE	TRUE	FALSE
cg02143487	chr17	79316286	79316287	TMEM105	284186	-11811	CGI-S-Shore	FALSE	FALSE	TRUE
cg02146383	chr16	22039309	22039310	C16orf52	730094	20349	Non-CGI	FALSE	TRUE	FALSE
cg02156570	chr1	208196481	208196482	CD34	947	-111797	Non-CGI	FALSE	TRUE	FALSE
cg02156952	chr1	201193569	201193570	IGFN1	91156	33615	Non-CGI	FALSE	TRUE	FALSE
cg02169713	chr6	31651094	31651095	LY6G5C	80741	721	CGI	FALSE	TRUE	FALSE
cg02172142	chr2	215675051	215675052	BARD1	580	-622	CGI	TRUE	FALSE	FALSE
cg02182308	chr10	8080045	8080046	GATA3-AS1	399717	15400	CGI-S-Shore	FALSE	FALSE	TRUE
cg02185675	chr8	133594318	133594319	HPYR1	93668	-20591	Non-CGI	FALSE	TRUE	FALSE
cg02187522	chr20	3065488	3065489	AVP	551	-117	CGI-S-Shore	TRUE	FALSE	FALSE
cg02196651	chr4	54457842	54457843	LNX1	84708	60838	Non-CGI	TRUE	TRUE	FALSE
cg02202411	chr5	6338418	6338419	FLJ33360	401172	-1012	Non-CGI	TRUE	FALSE	FALSE
cg02217713	chr7	643155	643156	FLJ44511	441307	83126	CGI-S-Shore	TRUE	TRUE	FALSE
cg02225096	chr10	46168403	46168404	ZFAND4	93550	-151	CGI	TRUE	FALSE	FALSE
cg02231062	chr22	42321087	42321088	TNFRSF13C	115650	1732	CGI-N-Shore	FALSE	TRUE	FALSE
cg02234489	chr17	71547421	71547422	SDK2	54549	92804	CGI-N-Shore	FALSE	TRUE	FALSE
cg02238453	chr16	77246048	77246049	SYCE1L	100130958	12698	CGI	TRUE	TRUE	FALSE
cg02239163	chr4	7720084	7720085	AFAP1-AS1	84740	-35731	CGI	FALSE	TRUE	FALSE
cg02241986	chr10	5566543	5566544	CALML3	810	-379	CGI-N-Shore	TRUE	FALSE	FALSE
cg02244431	chr2	236588226	236588227	AGAP1	116987	185492	CGI-S-Shore	FALSE	TRUE	FALSE
cg02247591	chr19	43979372	43979373	LYPD3	27076	-9540	CGI	FALSE	TRUE	FALSE
cg02248486	chr7	27183196	27183197	HOXA5	3202	89	CGI	TRUE	TRUE	FALSE
cg02250594	chr18	55103353	55103354	ONECUT2	9480	435	CGI	TRUE	FALSE	FALSE
cg02252248	chr17	47073164	47073165	IGF2BP1	10642	-1608	CGI	TRUE	FALSE	FALSE
cg02259384	chr3	58523373	58523374	ACOX2	8309	-443	Non-CGI	TRUE	FALSE	FALSE
cg02267270	chr6	37616410	37616411	MDGA1	266727	49354	CGI	TRUE	TRUE	FALSE
cg02276070	chr5	149683066	149683067	ARSI	340075	-540	CGI-S-Shore	TRUE	FALSE	FALSE
cg02276361	chr10	65351566	65351567	REEP3	221035	70442	Non-CGI	FALSE	TRUE	FALSE
cg02301019	chr16	85465191	85465192	LOC727710	727710	-128188	CGI	FALSE	FALSE	TRUE
cg02303265	chr20	49624601	49624602	KCNG1	3755	15072	CGI-N-Shore	FALSE	TRUE	FALSE
cg02303505	chr8	91592157	91592158	TMEM64	169200	211700	Non-CGI	FALSE	FALSE	TRUE
cg02303571	chr5	36606769	36606770	SLC1A3	6507	311	CGI	TRUE	FALSE	FALSE
cg02307033	chr2	75185585	75185586	POLE4	56655	-188	CGI	TRUE	FALSE	FALSE
cg02315619	chr3	62031063	62031064	ID2B	84099	79327	Non-CGI	FALSE	TRUE	FALSE
cg02319094	chr11	72980866	72980867	P2RY6	5031	5295	Non-CGI	TRUE	TRUE	FALSE
cg02322135	chr4	113969312	113969313	MIR1243	100302188	-58705	Non-CGI	TRUE	TRUE	FALSE
cg02357838	chr12	112847022	112847023	RPL6	6128	419	CGI	FALSE	TRUE	FALSE
cg02358362	chr5	172096266	172096267	NEURL1B	54492	27989	CGI-N-Shore	FALSE	TRUE	FALSE
cg02359433	chr6	1315143	1315144	FOXQ1	94234	2467	CGI-S-Shore	FALSE	FALSE	TRUE
cg02365086	chr1	27701171	27701172	FCN3	8547	142	Non-CGI	FALSE	TRUE	FALSE
cg02367160	chr5	166614884	166614885	TENM2	57451	-96957	Non-CGI	FALSE	FALSE	TRUE
cg02371121	chr16	1050484	1050485	SOX8	30812	18675	CGI	FALSE	FALSE	TRUE
cg02371397	chr15	33799380	33799381	RYR3	6263	196202	Non-CGI	FALSE	TRUE	FALSE
cg02375320	chr2	38978881	38978882	GEMIN6	79833	204	CGI	TRUE	FALSE	FALSE
cg02382400	chr20	3218487	3218488	SLC4A11	83959	1398	CGI-N-Shore	TRUE	TRUE	FALSE
cg02391713	chr6	105400985	105400986	LIN28B	389421	-3936	CGI	FALSE	FALSE	TRUE
cg02397497	chr6	10412073	10412074	LOC100130275	100130275	-476	CGI	TRUE	TRUE	FALSE
cg02397768	chr4	113430989	113430990	NEUROG2	63973	6337	CGI	FALSE	FALSE	TRUE
cg02398682	chr1	32802228	32802229	MARCKSL1	65108	-393	CGI	TRUE	FALSE	FALSE
cg02403931	chr17	8154898	8154899	PFAS	5198	2301	CGI-S-Shore	FALSE	TRUE	FALSE
cg02405003	chr4	146850277	146850278	ZNF827	152485	9328	Non-CGI	FALSE	TRUE	FALSE
cg02406098	chr3	32911355	32911356	TRIM71	131405	51844	Non-CGI	FALSE	TRUE	FALSE
cg02407720	chr6	10421372	10421373	TFAP2A	7020	-1574	CGI-S-Shore	TRUE	FALSE	FALSE
cg02409351	chr12	85674022	85674023	ALX1	8092	-12	CGI	TRUE	FALSE	FALSE
cg02412399	chr5	88307760	88307761	MEF2C	4208	-107837	Non-CGI	FALSE	FALSE	TRUE
cg02415029	chr1	110025642	110025643	ATXN7L2	127002	-917	CGI-N-Shore	TRUE	FALSE	FALSE
cg02441015	chr19	5244038	5244039	PTPRS	5802	96774	CGI	FALSE	TRUE	FALSE
cg02441747	chr4	110223646	110223647	COL25A1	84570	151	CGI	TRUE	FALSE	FALSE
cg02450981	chr1	32825803	32825804	FAM229A	100128071	2039	CGI-N-Shore	FALSE	FALSE	TRUE
cg02459543	chr8	94924611	94924612	MIR378D2	100616169	3734	CGI-N-Shelf	FALSE	FALSE	TRUE
cg02461406	chr2	166480502	166480503	CSRNP3	80034	154344	Non-CGI	FALSE	TRUE	FALSE
cg02466544	chr2	74641453	74641454	C2orf81	388963	3389	CGI-N-Shore	TRUE	TRUE	FALSE
cg02466815	chr2	177054573	177054574	HOXD-AS1	401022	-886	CGI	TRUE	TRUE	FALSE
cg02466924	chr7	111693032	111693033	DOCK4	9732	153428	Non-CGI	FALSE	TRUE	FALSE
cg02470179	chr3	31580476	31580477	STT3B	201595	5984	Non-CGI	FALSE	TRUE	FALSE
cg02478589	chr5	139082468	139082469	CXXC5	51523	54166	Non-CGI	FALSE	FALSE	TRUE
cg02480835	chr7	23221354	23221355	NUPL2	11097	-90	CGI-N-Shore	TRUE	FALSE	FALSE
cg02480970	chr10	49516634	49516635	MAPK8	5599	1847	CGI-S-Shore	FALSE	TRUE	FALSE
cg02494999	chr2	3423651	3423652	TRAPPC12	51112	40204	CGI	FALSE	TRUE	FALSE
cg02495310	chr5	134366831	134366832	PITX1	5307	3131	CGI-S-Shore	FALSE	TRUE	FALSE
cg02495569	chr5	172110211	172110212	NEURL1B	54492	41934	CGI	FALSE	TRUE	FALSE
cg02496234	chr7	20826128	20826129	SP8	221833	378	CGI	TRUE	TRUE	FALSE
cg02498983	chr6	88875398	88875399	CNR1	1268	367	CGI-N-Shore	FALSE	TRUE	FALSE
cg02500691	chr17	79476186	79476187	ACTG1	71	3704	CGI-N-Shore	FALSE	FALSE	TRUE
cg02500883	chr9	104356619	104356620	PPP3R2	5535	662	CGI-N-Shore	TRUE	TRUE	FALSE
cg02506501	chr1	1228990	1228991	SCNN1D	6339	13173	CGI	FALSE	TRUE	FALSE
cg02515738	chr7	146635353	146635354	MIR548F4	100313895	439858	Non-CGI	FALSE	TRUE	FALSE
cg02525989	chr3	186211511	186211512	LOC253573	253573	-60	CGI-N-Shore	TRUE	FALSE	FALSE
cg02528768	chr19	18547358	18547359	ISYNA1	51477	1751	CGI	FALSE	TRUE	FALSE
cg02529502	chr13	32489268	32489269	EEF1DP3	196549	68347	Non-CGI	FALSE	TRUE	FALSE
cg02530753	chr17	65955867	65955868	C17orf58	284018	33896	Non-CGI	FALSE	TRUE	FALSE
cg02549834	chr19	49164913	49164914	NTN5	126147	11349	CGI	FALSE	TRUE	FALSE
cg02554345	chr10	50604569	50604570	DRGX	644168	-1082	CGI	TRUE	FALSE	FALSE
cg02555944	chr8	143644107	143644108	ARC	23237	51724	CGI-N-Shore	FALSE	FALSE	TRUE
cg02561912	chr20	50158202	50158203	NFATC2	4773	20964	CGI-N-Shore	FALSE	TRUE	FALSE
cg02564523	chr7	102073539	102073540	ORAI2	80228	-455	CGI	TRUE	FALSE	FALSE
cg02565999	chr13	95003984	95003985	DCT	1638	127950	Non-CGI	FALSE	TRUE	FALSE
cg02568670	chr3	141173927	141173928	RASA2	5922	-31997	CGI-N-Shore	FALSE	FALSE	TRUE
cg02573468	chr15	41224537	41224538	DLL4	54567	3005	CGI-S-Shore	FALSE	TRUE	FALSE
cg02578103	chr16	67021154	67021155	CES4A	283848	-1336	Non-CGI	TRUE	FALSE	FALSE
cg02578535	chr3	57755895	57755896	SLMAP	7871	12720	Non-CGI	FALSE	TRUE	FALSE
cg02578559	chr3	39446481	39446482	RPSA	3921	-1721	CGI-N-Shore	TRUE	FALSE	FALSE
cg02578944	chr6	28227392	28227393	NKAPL	222698	293	CGI	TRUE	FALSE	FALSE
cg02589568	chr5	129373100	129373101	CHSY3	337876	132576	Non-CGI	FALSE	TRUE	FALSE
cg02590614	chr11	130343077	130343078	ADAMTS15	170689	24207	CGI	FALSE	TRUE	FALSE
cg02595760	chr6	100066673	100066674	PRDM13	59336	12022	CGI	FALSE	FALSE	TRUE
cg02605776	chr1	111507160	111507161	LRIF1	55791	-593	CGI-S-Shore	TRUE	FALSE	FALSE
cg02606505	chr3	42689703	42689704	ZBTB47	92999	-5471	Non-CGI	FALSE	TRUE	FALSE
cg02611770	chr18	46502975	46502976	SMAD7	4092	-25893	CGI	FALSE	FALSE	TRUE
cg02614129	chr5	134733615	134733616	H2AFY	9555	1960	CGI-N-Shore	FALSE	TRUE	FALSE
cg02627657	chr17	16257165	16257166	CENPV	201161	-352	CGI	TRUE	FALSE	FALSE
cg02627991	chr7	74032045	74032046	GTF2I	2969	-39983	Non-CGI	FALSE	FALSE	TRUE
cg02640147	chr5	170024515	170024516	GABRP	2568	-186206	Non-CGI	FALSE	TRUE	FALSE
cg02648847	chr1	167408735	167408736	CD247	919	79110	CGI	FALSE	TRUE	FALSE
cg02650401	chr3	181441501	181441502	SOX2	6657	11788	CGI-N-Shore	FALSE	TRUE	FALSE
cg02664205	chr6	136171652	136171653	PDE7B	27115	-1180	Non-CGI	TRUE	FALSE	FALSE
cg02691091	chr17	45992811	45992812	SP2	6668	19294	Non-CGI	FALSE	TRUE	FALSE
cg02693607	chr7	27150598	27150599	HOXA2	3199	-8203	CGI-S-Shore	FALSE	TRUE	FALSE
cg02693688	chr1	3818083	3818084	LOC100133612	100133612	1114	CGI-S-Shore	TRUE	TRUE	FALSE
cg02695062	chr6	30851417	30851418	DDR1	780	722	CGI-N-Shore	TRUE	TRUE	FALSE
cg02695074	chr19	52005070	52005071	SIGLEC12	89858	-26	Non-CGI	TRUE	FALSE	FALSE
cg02699218	chr5	132150128	132150129	SOWAHA	134548	1094	CGI	TRUE	FALSE	FALSE
cg02701080	chr21	38078431	38078432	SIM2	6493	6439	CGI-S-Shore	FALSE	TRUE	FALSE
cg02709032	chr19	33699683	33699684	LRP3	4037	14083	CGI-S-Shore	FALSE	TRUE	FALSE
cg02710332	chr11	65222786	65222787	NEAT1	283131	32516	CGI-S-Shore	FALSE	FALSE	TRUE
cg02715546	chr15	55881162	55881163	PYGO1	26108	-111	CGI	TRUE	FALSE	FALSE
cg02715777	chr5	170883698	170883699	FGF18	8817	37030	CGI	FALSE	TRUE	FALSE
cg02717887	chr19	12251057	12251058	ZNF20	7568	163	CGI	TRUE	TRUE	FALSE
cg02720321	chr10	3373668	3373669	PITRM1	10531	-158634	CGI	FALSE	TRUE	FALSE
cg02722188	chr4	55099058	55099059	GSX2	170825	132809	CGI-S-Shore	FALSE	TRUE	FALSE
cg02728483	chr2	172965081	172965082	DLX2	1746	2395	CGI	FALSE	TRUE	FALSE
cg02734527	chr16	4303413	4303414	LOC100507501	100507501	375	CGI-N-Shore	FALSE	TRUE	FALSE
cg02735446	chr14	77227574	77227575	VASH1	22846	-659	CGI	TRUE	FALSE	FALSE
cg02736255	chr18	77213901	77213902	NFATC1	4772	58128	CGI-S-Shore	FALSE	TRUE	FALSE
cg02746187	chr15	53076188	53076189	ONECUT1	3175	6019	CGI-S-Shore	FALSE	TRUE	FALSE
cg02753719	chr17	66657633	66657634	FAM20A	54757	-60537	Non-CGI	FALSE	FALSE	TRUE
cg02757572	chr17	48074317	48074318	DLX3	1747	-1728	CGI	TRUE	FALSE	FALSE
cg02774015	chr1	15735880	15735881	EFHD2	79180	-509	CGI-N-Shore	TRUE	FALSE	FALSE
cg02774129	chr1	58712062	58712063	OMA1	115209	300382	CGI-N-Shelf	FALSE	TRUE	FALSE
cg02774439	chr4	174451251	174451252	HAND2	9464	125	CGI	TRUE	FALSE	FALSE
cg02776659	chr21	47717406	47717407	YBEY	54059	11138	CGI	FALSE	TRUE	FALSE
cg02780919	chr11	9026308	9026309	NRIP3	56675	-711	CGI	TRUE	FALSE	FALSE
cg02786012	chr4	57371589	57371590	ARL9	132946	213	CGI	TRUE	FALSE	FALSE
cg02790122	chr10	65133532	65133533	MIR1296	100302150	-723	Non-CGI	TRUE	TRUE	FALSE
cg02795076	chr12	50505329	50505330	COX14	84987	-569	CGI	TRUE	FALSE	FALSE
cg02796420	chr2	100016281	100016282	TXNDC9	10190	-59115	Non-CGI	FALSE	TRUE	FALSE
cg02798621	chr6	82462430	82462431	FAM46A	55603	-1	CGI	TRUE	FALSE	FALSE
cg02808931	chr16	88503009	88503010	ZNF469	84627	9129	CGI	FALSE	TRUE	FALSE
cg02811362	chr20	49618509	49618510	KCNG1	3755	21164	CGI-N-Shore	FALSE	FALSE	TRUE
cg02821871	chr19	49133598	49133599	DBP	1628	7039	CGI	FALSE	TRUE	FALSE
cg02824604	chr12	42124611	42124612	GXYLT1	283464	414060	Non-CGI	FALSE	FALSE	TRUE
cg02832687	chr17	47759392	47759393	SPOP	8405	-3866	CGI-S-Shelf	FALSE	FALSE	TRUE
cg02834447	chr2	237766048	237766049	COPS8	10920	-228034	Non-CGI	FALSE	FALSE	TRUE
cg02835672	chr6	105725878	105725879	POPDC3	64208	-98019	Non-CGI	FALSE	TRUE	FALSE
cg02840585	chr1	2090953	2090954	C1orf86	199990	48217	CGI	FALSE	TRUE	FALSE
cg02847674	chr1	11905866	11905867	NPPA	4878	1972	Non-CGI	FALSE	TRUE	FALSE
cg02852421	chr15	70372614	70372615	MIR629	693214	-806	Non-CGI	TRUE	TRUE	FALSE
cg02853553	chr7	44258054	44258055	YKT6	10652	17475	CGI-N-Shore	FALSE	TRUE	FALSE
cg02862761	chr3	142681015	142681016	PAQR9	344838	1161	CGI-N-Shore	TRUE	TRUE	FALSE
cg02863179	chr10	63779053	63779054	ARID5B	84159	118039	Non-CGI	FALSE	TRUE	FALSE
cg02884944	chr2	240679706	240679707	LOC150935	150935	-4846	CGI	FALSE	FALSE	TRUE
cg02888838	chr2	128459936	128459937	SFT2D3	84826	1338	CGI	TRUE	FALSE	FALSE
cg02890435	chr6	33130918	33130919	COL11A2	1302	29325	CGI-S-Shore	FALSE	TRUE	FALSE
cg02891579	chr10	102823812	102823813	KAZALD1	81621	2812	CGI-S-Shore	FALSE	TRUE	FALSE
cg02895724	chr18	48719384	48719385	MEX3C	51320	4665	CGI-N-Shelf	FALSE	TRUE	FALSE
cg02902415	chr1	110088541	110088542	GNAI3	2773	-2643	CGI-N-Shelf	FALSE	FALSE	TRUE
cg02902477	chr6	26197071	26197072	HIST1H3D	8351	2391	CGI	TRUE	TRUE	FALSE
cg02903589	chr6	18215340	18215341	DEK	7913	49457	Non-CGI	FALSE	TRUE	FALSE
cg02904554	chr6	3404079	3404080	SLC22A23	63027	52712	Non-CGI	FALSE	TRUE	FALSE
cg02907638	chr3	134957197	134957198	EPHB1	2047	443097	Non-CGI	FALSE	TRUE	FALSE
cg02907662	chr14	103432714	103432715	AMN	81693	43720	CGI	TRUE	TRUE	FALSE
cg02908963	chr1	167042622	167042623	GPA33	10223	17244	Non-CGI	FALSE	TRUE	FALSE
cg02923490	chr6	37872019	37872020	ZFAND3	60685	84711	Non-CGI	FALSE	TRUE	FALSE
cg02925144	chr10	12085488	12085489	UPF2	26019	-318	CGI	TRUE	FALSE	FALSE
cg02930951	chr20	48806066	48806067	CEBPB	1051	-1052	CGI-N-Shore	TRUE	FALSE	FALSE
cg02931467	chr2	183729189	183729190	FRZB	2487	2307	CGI-N-Shore	FALSE	TRUE	FALSE
cg02932167	chr2	233352951	233352952	ECEL1	9427	-418	CGI-S-Shore	TRUE	FALSE	FALSE
cg02937873	chr19	36595986	36595987	TBCB	1155	-9900	Non-CGI	FALSE	TRUE	FALSE
cg02943497	chr13	25087090	25087091	PARP4	143	-141	CGI-S-Shore	TRUE	FALSE	FALSE
cg02945056	chr7	127225891	127225892	GCC1	79571	-236	CGI	TRUE	FALSE	FALSE
cg02946518	chr5	178683834	178683835	ADAMTS2	9509	88595	CGI-N-Shore	FALSE	TRUE	FALSE
cg02948125	chr17	7560317	7560318	ATP1B2	482	6062	CGI-S-Shore	FALSE	TRUE	FALSE
cg02958014	chr12	127206602	127206603	LOC100507206	100507206	-14949	Non-CGI	FALSE	FALSE	TRUE
cg02958960	chr17	76098276	76098277	LOC100131096	100131096	9602	CGI-N-Shelf	FALSE	TRUE	FALSE
cg02959759	chr12	2801584	2801585	LOC283440	283440	79249	CGI-S-Shore	TRUE	TRUE	FALSE
cg02961472	chr15	70340064	70340065	MIR629	693214	31741	Non-CGI	FALSE	FALSE	TRUE
cg02973961	chr16	65152965	65152966	CDH11	1009	2952	CGI-N-Shore	FALSE	TRUE	FALSE
cg02977954	chr1	53371368	53371369	ECHDC2	55268	21481	Non-CGI	FALSE	TRUE	FALSE
cg02982089	chr15	29409671	29409672	NDNL2	56160	152347	CGI	FALSE	TRUE	FALSE
cg02983424	chr15	97491433	97491434	SPATA8	145946	164753	CGI	FALSE	FALSE	TRUE
cg02988171	chr8	145621852	145621853	MIR939	100126351	-2406	CGI	TRUE	TRUE	FALSE
cg02995493	chr1	66311218	66311219	PDE4B	5142	53024	Non-CGI	FALSE	TRUE	FALSE
cg02998620	chr2	223171473	223171474	PAX3	5077	-7757	CGI	FALSE	FALSE	TRUE
cg03003335	chr1	1229351	1229352	SCNN1D	6339	13534	CGI	FALSE	TRUE	FALSE
cg03005685	chr14	94640029	94640030	PPP4R4	57718	-618	CGI	TRUE	FALSE	FALSE
cg03013329	chr18	22006989	22006990	IMPACT	55364	379	CGI	TRUE	TRUE	FALSE
cg03015610	chr16	58163699	58163700	C16orf80	29105	-402	CGI	TRUE	FALSE	FALSE
cg03020554	chr8	99951730	99951731	STK3	6788	3141	CGI	FALSE	TRUE	FALSE
cg03025830	chr8	21905599	21905600	FGF17	8822	5170	CGI	FALSE	TRUE	FALSE
cg03025986	chr2	3292757	3292758	TSSC1	7260	88894	CGI	FALSE	TRUE	FALSE
cg03028506	chr15	38577420	38577421	SPRED1	161742	32367	Non-CGI	FALSE	TRUE	FALSE
cg03031009	chr10	10835019	10835020	SFTA1P	207107	1856	Non-CGI	FALSE	TRUE	FALSE
cg03032264	chr14	23954732	23954733	NGDN	25983	15833	Non-CGI	FALSE	FALSE	TRUE
cg03032497	chr14	61108227	61108228	SIX1	6495	7926	CGI-N-Shore	FALSE	FALSE	TRUE
cg03032552	chr4	2788986	2788987	SH3BP2	6452	-5762	Non-CGI	FALSE	FALSE	TRUE
cg03038245	chr10	630310	630311	PRR26	414235	-65576	CGI-S-Shore	FALSE	TRUE	FALSE
cg03039974	chr19	49467169	49467170	FTL	2512	-1395	CGI-N-Shore	TRUE	FALSE	FALSE
cg03041629	chr11	100463590	100463591	ARHGAP42	143872	-94815	Non-CGI	FALSE	FALSE	TRUE
cg03043824	chr1	38709691	38709692	LOC339442	339442	-29251	Non-CGI	FALSE	FALSE	TRUE
cg03052789	chr3	50603449	50603450	HEMK1	51409	-3132	CGI-N-Shore	TRUE	TRUE	FALSE
cg03057409	chr10	102729640	102729641	SEMA4G	57715	359	CGI	TRUE	TRUE	FALSE
cg03062002	chr17	40832009	40832010	CCR10	2826	1834	CGI	FALSE	TRUE	FALSE
cg03065311	chr20	62601662	62601663	ZNF512B	57473	-443	CGI-S-Shore	TRUE	FALSE	FALSE
cg03065891	chr2	8301459	8301460	LINC00299	339789	167088	Non-CGI	FALSE	TRUE	FALSE
cg03071124	chr7	157447178	157447179	MIR153-2	406945	-80063	CGI-S-Shore	FALSE	TRUE	FALSE
cg03071134	chr17	34626096	34626097	CCL3L1	6349	-365	Non-CGI	TRUE	TRUE	FALSE
cg03074925	chr6	10425625	10425626	TFAP2A	7020	-5827	CGI	FALSE	FALSE	TRUE
cg03078269	chr12	54354974	54354975	HOXC12	3228	6259	CGI	FALSE	FALSE	TRUE
cg03094620	chr16	22924626	22924627	HS3ST2	9956	98765	CGI-N-Shore	FALSE	TRUE	FALSE
cg03100209	chr19	49921142	49921143	PTH2	113091	5554	CGI-N-Shelf	FALSE	TRUE	FALSE
cg03107393	chr17	46692553	46692554	HOXB8	3218	-251	CGI-S-Shore	TRUE	FALSE	FALSE
cg03111404	chr6	28175984	28175985	TOB2P1	222699	10721	CGI	FALSE	FALSE	TRUE
cg03111818	chr12	14927076	14927077	H2AFJ	55766	-192	CGI	TRUE	FALSE	FALSE
cg03113254	chr4	174439179	174439180	HAND2	9464	12197	CGI	FALSE	FALSE	TRUE
cg03114253	chr1	158122905	158122906	LOC646268	646268	-12474	CGI-S-Shelf	FALSE	FALSE	TRUE
cg03117577	chr17	20187457	20187458	CCDC144C	348254	-37028	Non-CGI	FALSE	TRUE	FALSE
cg03117611	chr12	125223679	125223680	SCARB1	949	124838	CGI	FALSE	FALSE	TRUE
cg03123979	chr16	1041053	1041054	SOX8	30812	9244	CGI-S-Shore	FALSE	FALSE	TRUE
cg03124139	chr2	11024896	11024897	KCNF1	3754	-27165	Non-CGI	FALSE	FALSE	TRUE
cg03124769	chr7	138793831	138793832	ZC3HAV1	56829	632	CGI	TRUE	FALSE	FALSE
cg03132220	chr2	152890701	152890702	CACNB4	785	64890	Non-CGI	FALSE	TRUE	FALSE
cg03132556	chr12	54366760	54366761	HOXC11	3227	-148	CGI-N-Shore	TRUE	FALSE	FALSE
cg03139843	chr8	1051585	1051586	LOC286083	286083	199240	CGI	FALSE	TRUE	FALSE
cg03140421	chr16	67200181	67200182	HSF4	3299	2892	CGI-S-Shore	FALSE	TRUE	FALSE
cg03141944	chr2	206595862	206595863	NRP2	8828	48637	Non-CGI	FALSE	TRUE	FALSE
cg03142905	chr6	53728998	53728999	LRRC1	55227	69463	Non-CGI	FALSE	TRUE	FALSE
cg03145062	chr17	50188449	50188450	CA10	56934	48926	Non-CGI	FALSE	TRUE	FALSE
cg03155027	chr3	49907692	49907693	CAMKV	79012	-322	CGI-S-Shore	TRUE	FALSE	FALSE
cg03160135	chr6	117586918	117586919	VGLL2	245806	196	CGI	TRUE	FALSE	FALSE
cg03169242	chr11	9638619	9638620	WEE1	7465	43390	CGI-S-Shelf	FALSE	FALSE	TRUE
cg03171465	chr2	99553830	99553831	KIAA1211L	343990	-1145	CGI	TRUE	FALSE	FALSE
cg03192163	chr6	137365300	137365301	IL20RA	53832	996	CGI	TRUE	TRUE	FALSE
cg03193698	chr11	62647979	62647980	SLC3A2	6520	24494	CGI-N-Shore	TRUE	TRUE	FALSE
cg03198029	chr2	128431385	128431386	LIMS2	55679	7973	CGI-N-Shore	TRUE	TRUE	FALSE
cg03199651	chr4	4862770	4862771	MSX1	4487	1377	CGI	FALSE	TRUE	FALSE
cg03200571	chr4	186284709	186284710	LRP2BP	55805	15461	Non-CGI	FALSE	TRUE	FALSE
cg03205252	chr16	51187536	51187537	SALL1	6299	-2352	CGI-S-Shore	FALSE	FALSE	TRUE
cg03206044	chr4	148657866	148657867	ARHGAP10	79658	4412	CGI-S-Shelf	FALSE	TRUE	FALSE
cg03212131	chr5	33958213	33958214	RXFP3	51289	21721	Non-CGI	FALSE	TRUE	FALSE
cg03213860	chr11	77185670	77185671	PAK1	5058	-561	CGI	TRUE	FALSE	FALSE
cg03219282	chr6	30042985	30042986	RNF39	80352	641	CGI	FALSE	TRUE	FALSE
cg03219493	chr14	94392408	94392409	FAM181A-AS1	283592	308	CGI-N-Shore	TRUE	TRUE	FALSE
cg03221715	chr3	129148362	129148363	EFCAB12	90288	-867	CGI-S-Shore	TRUE	FALSE	FALSE
cg03221837	chr16	54619969	54619970	IRX3	79191	-299590	CGI	FALSE	FALSE	TRUE
cg03231163	chr19	39360465	39360466	RINL	126432	8452	CGI	FALSE	TRUE	FALSE
cg03231471	chr11	120811322	120811323	TBCEL	219899	-83479	Non-CGI	FALSE	TRUE	FALSE
cg03245733	chr8	124407825	124407826	ATAD2	29028	20763	CGI-N-Shore	FALSE	TRUE	FALSE
cg03259742	chr12	25354328	25354329	LYRM5	144363	6177	Non-CGI	FALSE	TRUE	FALSE
cg03267280	chr2	169374391	169374392	CERS6	253782	61555	Non-CGI	FALSE	TRUE	FALSE
cg03274401	chr8	17017479	17017480	ZDHHC2	51201	3642	CGI-S-Shelf	FALSE	TRUE	FALSE
cg03275076	chr3	150985693	150985694	P2RY14	9934	10535	Non-CGI	FALSE	TRUE	FALSE
cg03276552	chr3	190229556	190229557	IL1RAP	3556	-2282	CGI-N-Shore	FALSE	FALSE	TRUE
cg03276982	chr8	119024055	119024056	EXT1	2131	100001	Non-CGI	FALSE	TRUE	FALSE
cg03283080	chr6	1309779	1309780	FOXQ1	94234	-2894	CGI-N-Shore	FALSE	FALSE	TRUE
cg03283842	chr2	179343803	179343804	FKBP7	51661	-447	CGI	TRUE	TRUE	FALSE
cg03283929	chr16	47117092	47117093	NETO2	81831	60842	Non-CGI	FALSE	TRUE	FALSE
cg03288168	chr4	10784468	10784469	CLNK	116449	-98081	CGI-S-Shore	FALSE	FALSE	TRUE
cg03303633	chr2	145196972	145196973	ZEB2	9839	80984	Non-CGI	FALSE	TRUE	FALSE
cg03306221	chr22	44258602	44258603	SULT4A1	25830	-223	CGI	TRUE	FALSE	FALSE
cg03308839	chr16	15797297	15797298	MIR484	619553	60145	Non-CGI	FALSE	TRUE	FALSE
cg03310242	chr12	2903563	2903564	FKBP4	2288	-543	CGI	TRUE	FALSE	FALSE
cg03314644	chr14	31890001	31890002	DTD2	112487	36677	CGI	TRUE	TRUE	FALSE
cg03327443	chr12	131191052	131191053	RIMBP2	23504	9772	CGI	FALSE	TRUE	FALSE
cg03331387	chr3	127114962	127114963	TPRA1	131601	194604	Non-CGI	FALSE	FALSE	TRUE
cg03336402	chr7	133662267	133662268	LRGUK	136332	-149836	Non-CGI	FALSE	TRUE	FALSE
cg03340307	chr2	148747824	148747825	MBD5	55777	-30754	Non-CGI	FALSE	TRUE	FALSE
cg03348196	chr7	1132345	1132346	GPER	2852	10500	CGI	TRUE	TRUE	FALSE
cg03349184	chr6	28740982	28740983	LOC401242	401242	90470	CGI	FALSE	FALSE	TRUE
cg03353436	chr11	7985166	7985167	NLRP10	338322	-106	Non-CGI	TRUE	FALSE	FALSE
cg03361664	chr11	3187760	3187761	OSBPL5	114879	207	CGI-S-Shore	TRUE	TRUE	FALSE
cg03379681	chr3	151058527	151058528	P2RY13	53829	-11189	Non-CGI	TRUE	TRUE	FALSE
cg03393966	chr19	18548015	18548016	ISYNA1	51477	1094	CGI	TRUE	TRUE	FALSE
cg03396664	chr16	88479546	88479547	ZNF469	84627	-14331	CGI	FALSE	FALSE	TRUE
cg03398002	chr1	15272082	15272083	TMEM51-AS1	200197	206876	Non-CGI	TRUE	TRUE	FALSE
cg03404566	chr17	6899310	6899311	ALOX12	239	-72	CGI	TRUE	TRUE	FALSE
cg03406394	chr15	60296138	60296139	FOXB1	27023	-281	CGI	TRUE	FALSE	FALSE
cg03426023	chr16	54972078	54972079	IRX5	10265	6966	CGI	FALSE	FALSE	TRUE
cg03427905	chr3	64671378	64671379	ADAMTS9-AS2	100507098	831	CGI	FALSE	TRUE	FALSE
cg03431111	chr11	62621406	62621407	SNORD29	9297	32	CGI-N-Shore	TRUE	TRUE	FALSE
cg03434780	chr3	78719421	78719422	ROBO1	6091	1097636	Non-CGI	TRUE	TRUE	FALSE
cg03437157	chr6	100052633	100052634	PRDM13	59336	-2015	CGI	FALSE	FALSE	TRUE
cg03440540	chr22	48976173	48976174	LOC284933	284933	-32973	CGI-S-Shore	FALSE	TRUE	FALSE
cg03442269	chr2	31182061	31182062	CAPN13	92291	-151749	Non-CGI	FALSE	TRUE	FALSE
cg03448612	chr2	171672694	171672695	GAD1	2571	-504	CGI	TRUE	FALSE	FALSE
cg03457729	chr15	89953295	89953296	LOC254559	254559	41964	CGI	FALSE	FALSE	TRUE
cg03457781	chr3	20418856	20418857	SGOL1	151648	-191131	Non-CGI	FALSE	FALSE	TRUE
cg03468072	chr12	39539422	39539423	CPNE8	144402	-240001	CGI	FALSE	FALSE	TRUE
cg03469682	chr3	100889156	100889157	IMPG2	50939	150261	Non-CGI	FALSE	FALSE	TRUE
cg03472672	chr6	28762471	28762472	LOC401242	401242	68981	CGI	FALSE	FALSE	TRUE
cg03472954	chr7	597596	597597	FLJ44511	441307	37567	CGI	FALSE	TRUE	FALSE
cg03476948	chr14	78715384	78715385	NRXN3	9369	78455	Non-CGI	FALSE	TRUE	FALSE
cg03490331	chr5	172672817	172672818	NKX2-5	1482	-10501	CGI	FALSE	FALSE	TRUE
cg03497907	chr10	131759467	131759468	EBF3	253738	2622	CGI-S-Shore	FALSE	TRUE	FALSE
cg03503297	chr16	30441811	30441812	DCTPP1	79077	-437	CGI	TRUE	FALSE	FALSE
cg03506489	chr11	30038788	30038789	KCNA4	3739	-210	CGI	TRUE	FALSE	FALSE
cg03507326	chr16	2801952	2801953	SRRM2	23524	-376	CGI	TRUE	TRUE	FALSE
cg03507641	chr12	1598243	1598244	LOC100292680	100292680	-11412	Non-CGI	FALSE	TRUE	FALSE
cg03508212	chr2	3623692	3623693	RPS7	6201	838	CGI	TRUE	TRUE	FALSE
cg03509094	chr19	7928546	7928547	FLJ22184	80164	10778	CGI	FALSE	TRUE	FALSE
cg03509329	chr14	24520788	24520789	LRRC16B	90668	-416	CGI-N-Shore	TRUE	FALSE	FALSE
cg03514086	chr12	118313817	118313818	KSR2	283455	92209	CGI	FALSE	TRUE	FALSE
cg03519180	chr10	119102524	119102525	PDZD8	118987	32411	Non-CGI	FALSE	TRUE	FALSE
cg03536820	chr2	3467389	3467390	ADI1	55256	55959	CGI-N-Shore	FALSE	TRUE	FALSE
cg03538814	chr19	34667843	34667844	LSM14A	26065	4490	CGI-S-Shelf	FALSE	TRUE	FALSE
cg03543495	chr11	94277826	94277827	FUT4	2526	808	CGI	TRUE	TRUE	FALSE
cg03547218	chr7	27190849	27190850	HOXA6	3203	-3455	CGI-S-Shore	FALSE	TRUE	FALSE
cg03547840	chr5	72715927	72715928	BTF3	689	-78321	CGI	FALSE	FALSE	TRUE
cg03554170	chr5	36606756	36606757	SLC1A3	6507	298	CGI	TRUE	FALSE	FALSE
cg03555227	chr5	170289070	170289071	RANBP17	64901	173	CGI	FALSE	TRUE	FALSE
cg03557857	chr10	103589693	103589694	LOC100289509	100289509	10867	CGI	TRUE	TRUE	FALSE
cg03564730	chr2	310099	310100	FAM150B	285016	-21790	CGI-S-Shore	FALSE	FALSE	TRUE
cg03571445	chr16	87946173	87946174	CA5A	763	23937	CGI	FALSE	TRUE	FALSE
cg03573179	chr6	36165382	36165383	BRPF3	27154	831	CGI-S-Shore	TRUE	TRUE	FALSE
cg03576469	chr19	46917061	46917062	CCDC8	83987	-141	CGI	TRUE	FALSE	FALSE
cg03577837	chr2	113570123	113570124	IL1B	3553	24231	Non-CGI	FALSE	FALSE	TRUE
cg03585969	chr10	35415529	35415530	CREM	1390	-238	CGI	TRUE	FALSE	FALSE
cg03586240	chr7	1966361	1966362	MIR4655	100616160	-82471	CGI-S-Shore	FALSE	TRUE	FALSE
cg03587042	chr10	18689035	18689036	NSUN6	221078	251513	Non-CGI	TRUE	TRUE	FALSE
cg03589001	chr15	79164714	79164715	MORF4L1	10933	-456	CGI	TRUE	FALSE	FALSE
cg03593014	chr10	98977821	98977822	SLIT1	6585	-32137	Non-CGI	FALSE	TRUE	FALSE
cg03606269	chr5	77779546	77779547	SCAMP1	9522	123206	Non-CGI	FALSE	FALSE	TRUE
cg03606772	chr1	152487856	152487857	CRCT1	54544	877	CGI-N-Shore	TRUE	TRUE	FALSE
cg03607117	chr3	53080440	53080441	SFMBT1	51460	-350	CGI	TRUE	FALSE	FALSE
cg03614916	chr18	22007271	22007272	IMPACT	55364	661	CGI-S-Shore	TRUE	TRUE	FALSE
cg03617345	chr22	17690680	17690681	CECR1	51816	12056	CGI-N-Shelf	TRUE	TRUE	FALSE
cg03617572	chr11	3187631	3187632	OSBPL5	114879	336	CGI-S-Shore	TRUE	TRUE	FALSE
cg03617826	chr5	140718405	140718406	PCDHGA2	56113	50	CGI-N-Shore	TRUE	TRUE	FALSE
cg03625952	chr5	159625457	159625458	FABP6	2172	11082	Non-CGI	TRUE	TRUE	FALSE
cg03630344	chr1	7831156	7831157	VAMP3	9341	-171	CGI	TRUE	FALSE	FALSE
cg03642472	chr6	145670687	145670688	LOC100507557	100507557	-385316	Non-CGI	FALSE	FALSE	TRUE
cg03647778	chr5	156934938	156934939	NIPAL4	348938	47910	Non-CGI	FALSE	TRUE	FALSE
cg03649284	chr1	52345292	52345293	NRD1	4898	-682	CGI-S-Shore	TRUE	FALSE	FALSE
cg03649497	chr17	48662783	48662784	CACNA1G-AS1	253962	-23313	Non-CGI	FALSE	TRUE	FALSE
cg03656092	chr17	79163394	79163395	AATK	9625	-23521	CGI-N-Shore	FALSE	TRUE	FALSE
cg03657766	chr2	172967014	172967015	DLX2	1746	462	CGI	TRUE	FALSE	FALSE
cg03660500	chr1	197887649	197887650	LHX9	56956	6013	CGI	FALSE	TRUE	FALSE
cg03663715	chr5	72744904	72744905	BTF3	689	-49344	CGI	TRUE	FALSE	FALSE
cg03665853	chr1	85219864	85219865	SSX2IP	117178	-63423	CGI-N-Shore	FALSE	FALSE	TRUE
cg03669282	chr1	228566718	228566719	TRIM11	81559	27797	CGI	FALSE	FALSE	TRUE
cg03680517	chr10	43632967	43632968	CSGALNACT2	55454	-965	CGI-N-Shore	TRUE	FALSE	FALSE
cg03694713	chr8	23564156	23564157	NKX2-6	137814	-44	CGI	TRUE	FALSE	FALSE
cg03702533	chr15	77830579	77830580	LOC253044	253044	-103525	Non-CGI	FALSE	FALSE	TRUE
cg03710354	chr17	72919704	72919705	USH1G	124590	-352	CGI	TRUE	FALSE	FALSE
cg03715143	chr6	19837743	19837744	ID4	3400	125	CGI	TRUE	FALSE	FALSE
cg03716936	chr10	124908747	124908748	HMX2	3167	1108	CGI	FALSE	TRUE	FALSE
cg03717755	chr6	16136539	16136540	MIR4639	100616269	-5237	Non-CGI	FALSE	TRUE	FALSE
cg03733760	chr11	69517841	69517842	FGF19	9965	1263	CGI	FALSE	TRUE	FALSE
cg03733992	chr20	37063526	37063527	LOC388796	388796	490	CGI	TRUE	TRUE	FALSE
cg03737367	chr19	50005045	50005046	MIR150	406942	-919	Non-CGI	TRUE	FALSE	FALSE
cg03738669	chr20	3218476	3218477	SLC4A11	83959	1409	CGI-N-Shore	TRUE	TRUE	FALSE
cg03740162	chr9	1050680	1050681	DMRT2	10655	333	CGI	TRUE	TRUE	FALSE
cg03740333	chr6	135376917	135376918	HBS1L	10767	-880	CGI-S-Shore	TRUE	FALSE	FALSE
cg03740666	chr16	75597830	75597831	GABARAPL2	11345	-2417	CGI-N-Shore	FALSE	FALSE	TRUE
cg03745493	chr18	9380358	9380359	TWSG1	57045	45592	Non-CGI	FALSE	TRUE	FALSE
cg03752800	chr12	51346423	51346424	HIGD1C	613227	-1357	Non-CGI	TRUE	FALSE	FALSE
cg03763300	chr8	69246056	69246057	LOC286189	286189	-2329	CGI-S-Shore	FALSE	TRUE	FALSE
cg03772567	chr1	55676815	55676816	USP24	23358	4222	CGI-N-Shelf	FALSE	TRUE	FALSE
cg03774514	chr20	22563702	22563703	FOXA2	3170	2397	CGI	FALSE	TRUE	FALSE
cg03780132	chr5	42951346	42951347	LOC648987	648987	67565	CGI	FALSE	FALSE	TRUE
cg03781727	chr7	22007540	22007541	CDCA7L	55536	-21997	Non-CGI	FALSE	FALSE	TRUE
cg03790250	chr4	20256326	20256327	SLIT2	9353	1090	CGI	FALSE	TRUE	FALSE
cg03791150	chr3	42542232	42542233	VIPR1	7433	11440	CGI-N-Shore	TRUE	TRUE	FALSE
cg03792964	chr3	73836161	73836162	PDZRN3	23024	-162088	Non-CGI	FALSE	FALSE	TRUE
cg03799530	chr12	111843215	111843216	SH2B3	10019	-535	CGI	TRUE	FALSE	FALSE
cg03807298	chr5	174159039	174159040	MSX2	4488	7463	CGI	FALSE	FALSE	TRUE
cg03819783	chr2	119067637	119067638	INSIG2	51141	221586	CGI	FALSE	FALSE	TRUE
cg03824275	chr3	40004565	40004566	MYRIP	25924	153261	Non-CGI	FALSE	TRUE	FALSE
cg03830936	chr2	220415201	220415202	MIR3132	100423039	-1331	CGI-N-Shore	TRUE	TRUE	FALSE
cg03832697	chr15	38228220	38228221	TMCO5A	145942	1392	Non-CGI	FALSE	TRUE	FALSE
cg03833604	chr12	54378500	54378501	HOXC10	3226	-444	CGI	TRUE	FALSE	FALSE
cg03840259	chr22	40297036	40297037	GRAP2	9402	-48	Non-CGI	TRUE	FALSE	FALSE
cg03840647	chr14	36974968	36974969	SFTA3	253970	13847	CGI	FALSE	TRUE	FALSE
cg03851515	chr7	19800822	19800823	TMEM196	256130	12392	Non-CGI	FALSE	TRUE	FALSE
cg03857553	chr22	29976613	29976614	NIPSNAP1	8508	711	CGI-N-Shore	FALSE	TRUE	FALSE
cg03858703	chr3	68316096	68316097	FAM19A1	407738	275361	Non-CGI	FALSE	TRUE	FALSE
cg03860037	chr13	28497359	28497360	PDX1	3651	3190	CGI	FALSE	TRUE	FALSE
cg03861217	chr2	155652401	155652402	KCNJ3	3760	97307	Non-CGI	FALSE	TRUE	FALSE
cg03874199	chr2	176964456	176964457	HOXD12	3238	-72	CGI	TRUE	FALSE	FALSE
cg03877913	chr2	39225985	39225986	LOC375196	375196	-38499	Non-CGI	FALSE	TRUE	FALSE
cg03877957	chr17	47979595	47979596	TAC4	255061	-54215	CGI	FALSE	FALSE	TRUE
cg03879594	chr16	85207569	85207570	LOC400548	400548	36812	CGI-S-Shore	FALSE	FALSE	TRUE
cg03882270	chr4	3384736	3384737	HGFAC	3083	-58988	CGI-N-Shelf	FALSE	TRUE	FALSE
cg03884572	chr12	111521899	111521900	CUX2	23316	50070	Non-CGI	FALSE	TRUE	FALSE
cg03891644	chr1	81510925	81510926	LPHN2	23266	-260918	Non-CGI	FALSE	FALSE	TRUE
cg03895047	chr3	27114861	27114862	NEK10	152110	296049	Non-CGI	FALSE	FALSE	TRUE
cg03897489	chr8	126512934	126512935	TRIB1	10221	70370	Non-CGI	FALSE	FALSE	TRUE
cg03910901	chr7	99686330	99686331	COPS6	10980	-251	CGI-N-Shore	TRUE	FALSE	FALSE
cg03935096	chr16	9048985	9048986	USP7	7874	8354	CGI-S-Shore	FALSE	TRUE	FALSE
cg03941587	chr4	123747634	123747635	FGF2	2247	-227	CGI	TRUE	FALSE	FALSE
cg03954991	chr1	36916605	36916606	OSCP1	127700	-518	CGI	TRUE	FALSE	FALSE
cg03956606	chr1	11249057	11249058	ANGPTL7	10218	-339	Non-CGI	TRUE	TRUE	FALSE
cg03957108	chr2	63276545	63276546	OTX1	5013	-645	CGI-S-Shore	TRUE	FALSE	FALSE
cg03957885	chr10	89855267	89855268	PTEN	5728	232071	Non-CGI	FALSE	FALSE	TRUE
cg03958979	chr6	108486387	108486388	NR2E1	7101	-826	CGI	TRUE	FALSE	FALSE
cg03967329	chr6	26030329	26030330	HIST1H3B	8358	1957	CGI-N-Shore	FALSE	FALSE	TRUE
cg03975694	chr19	38042472	38042473	ZNF540	163255	198	CGI	TRUE	TRUE	FALSE
cg03982355	chr17	7255542	7255543	KCTD11	147040	333	CGI	TRUE	FALSE	FALSE
cg03986418	chr16	14543946	14543947	MIR365A	100126355	140803	Non-CGI	FALSE	TRUE	FALSE
cg03987227	chr5	139494540	139494541	PURA	5813	831	CGI-S-Shore	TRUE	FALSE	FALSE
cg03994248	chr8	27175038	27175039	PTK2B	2185	6038	Non-CGI	FALSE	TRUE	FALSE
cg04001941	chr2	135105846	135105847	MGAT5	4249	94015	Non-CGI	FALSE	TRUE	FALSE
cg04024417	chr7	96294348	96294349	LOC100506136	100506136	-697	Non-CGI	TRUE	FALSE	FALSE
cg04028224	chr17	72733172	72733173	MIR3615	100500847	-11578	CGI	TRUE	TRUE	FALSE
cg04031134	chr7	98630788	98630789	SMURF1	57154	110953	CGI-N-Shelf	FALSE	TRUE	FALSE
cg04034539	chr11	62439802	62439803	C11orf48	79081	-560	CGI	TRUE	TRUE	FALSE
cg04037585	chr16	56231292	56231293	DKFZP434H168	26077	-2854	CGI-S-Shelf	FALSE	TRUE	FALSE
cg04037707	chr7	154704915	154704916	LOC100132707	100132707	-15310	CGI-N-Shore	FALSE	FALSE	TRUE
cg04043591	chr7	19155806	19155807	TWIST1	7291	1487	CGI-N-Shore	FALSE	TRUE	FALSE
cg04050331	chr10	8096088	8096089	GATA3	2625	-577	CGI	TRUE	FALSE	FALSE
cg04051571	chr8	27850258	27850259	SCARA5	286133	109	Non-CGI	TRUE	FALSE	FALSE
cg04062391	chr19	9609204	9609205	ZNF560	147741	73	CGI	FALSE	TRUE	FALSE
cg04073257	chr7	27190558	27190559	HOXA6	3203	-3164	CGI	FALSE	TRUE	FALSE
cg04087571	chr11	116723030	116723031	APOA1	335	-14691	Non-CGI	FALSE	TRUE	FALSE
cg04088289	chr1	19205990	19205991	MIR4695	100616120	3782	CGI-S-Shore	FALSE	TRUE	FALSE
cg04090028	chr2	208544511	208544512	CCNYL1	151195	-31751	CGI-N-Shore	FALSE	FALSE	TRUE
cg04090392	chr15	83952774	83952775	BNC1	646	692	CGI	TRUE	TRUE	FALSE
cg04094193	chr4	69216103	69216104	YTHDC1	91746	-278	CGI-S-Shore	TRUE	FALSE	FALSE
cg04096305	chr1	5809461	5809462	MIR4689	100616421	113338	Non-CGI	FALSE	FALSE	TRUE
cg04098829	chr5	92744116	92744117	FLJ42709	441094	172885	Non-CGI	FALSE	FALSE	TRUE
cg04133652	chr17	36860971	36860972	MLLT6	4302	-900	CGI-S-Shore	TRUE	FALSE	FALSE
cg04136456	chr1	11413470	11413471	UBIAD1	29914	80214	Non-CGI	FALSE	FALSE	TRUE
cg04139449	chr6	45631407	45631408	SUPT3H	8464	-285736	CGI	FALSE	FALSE	TRUE
cg04143120	chr11	72968848	72968849	P2RY6	5031	-6720	Non-CGI	FALSE	FALSE	TRUE
cg04147969	chr15	70432547	70432548	TLE3	7090	-42290	Non-CGI	FALSE	FALSE	TRUE
cg04148515	chr8	128875157	128875158	MIR1204	100302185	66948	Non-CGI	FALSE	TRUE	FALSE
cg04152616	chr16	88479315	88479316	ZNF469	84627	-14562	CGI-N-Shore	FALSE	FALSE	TRUE
cg04153563	chr16	61323411	61323412	CDH8	1006	747326	Non-CGI	FALSE	FALSE	TRUE
cg04193160	chr1	228400419	228400420	OBSCN	84033	4557	CGI	FALSE	TRUE	FALSE
cg04208435	chr1	192116518	192116519	RGS18	64407	-11072	Non-CGI	FALSE	FALSE	TRUE
cg04211115	chr17	13504008	13504009	HS3ST3A1	9955	1234	CGI	TRUE	FALSE	FALSE
cg04212450	chr7	90997889	90997890	FZD1	8321	104105	Non-CGI	FALSE	FALSE	TRUE
cg04213213	chr3	16831943	16831944	PLCL2	23228	-12214	Non-CGI	FALSE	FALSE	TRUE
cg04223553	chr5	153852934	153852935	HAND1	9421	4888	CGI	FALSE	FALSE	TRUE
cg04226366	chr20	61561020	61561021	DIDO1	11083	8282	CGI-S-Shore	FALSE	TRUE	FALSE
cg04242525	chr8	144236576	144236577	LY6H	4062	5475	CGI	FALSE	FALSE	TRUE
cg04244849	chr1	46929878	46929879	LOC729041	729041	30378	CGI-N-Shelf	FALSE	FALSE	TRUE
cg04255207	chr11	45689077	45689078	CHST1	8534	-1870	CGI-S-Shore	TRUE	FALSE	FALSE
cg04274990	chr16	27611319	27611320	KIAA0556	23247	49850	Non-CGI	FALSE	TRUE	FALSE
cg04290586	chr12	108168987	108168988	ASCL4	121549	824	CGI-N-Shore	TRUE	FALSE	FALSE
cg04304770	chr17	59477266	59477267	TBX2	6909	8	CGI	TRUE	FALSE	FALSE
cg04313978	chr7	158271081	158271082	MIR595	693180	54422	CGI	FALSE	TRUE	FALSE
cg04314414	chr1	198883434	198883435	LOC100131234	100131234	23122	Non-CGI	FALSE	TRUE	FALSE
cg04316941	chr1	202224262	202224263	LGR6	59352	61143	Non-CGI	FALSE	TRUE	FALSE
cg04318279	chr11	112830149	112830150	NCAM1	4684	-1818	CGI-N-Shore	TRUE	TRUE	FALSE
cg04338129	chr11	65635391	65635392	EFEMP2	30008	5012	CGI	FALSE	TRUE	FALSE
cg04339462	chr14	100028196	100028197	CCDC85C	317762	42529	Non-CGI	FALSE	TRUE	FALSE
cg04340895	chr4	47463168	47463169	COMMD8	54951	2506	CGI-N-Shelf	FALSE	TRUE	FALSE
cg04342863	chr2	62560135	62560136	B3GNT2	10678	136872	Non-CGI	FALSE	FALSE	TRUE
cg04344749	chr1	25871814	25871815	LDLRAP1	26119	1737	CGI-S-Shore	FALSE	TRUE	FALSE
cg04346459	chr6	41068666	41068667	ADCY10P1	221442	-105	CGI	TRUE	TRUE	FALSE
cg04348023	chr1	70384012	70384013	PIN1P1	5301	-991	CGI-N-Shore	TRUE	TRUE	FALSE
cg04349839	chr4	25789390	25789391	SEL1L3	23231	75218	Non-CGI	FALSE	TRUE	FALSE
cg04354126	chr1	6338812	6338813	GPR153	387509	-17776	CGI-N-Shore	FALSE	TRUE	FALSE
cg04360147	chr1	27021709	27021710	ARID1A	8289	-811	CGI-S-Shore	TRUE	FALSE	FALSE
cg04367093	chr10	3373675	3373676	PITRM1	10531	-158641	CGI	FALSE	TRUE	FALSE
cg04368796	chr17	40171968	40171969	DNAJC7	7266	-2252	CGI	TRUE	TRUE	FALSE
cg04377908	chr22	48977382	48977383	LOC284933	284933	-34182	CGI	FALSE	TRUE	FALSE
cg04379348	chr19	46318762	46318763	RSPH6A	81492	-156	CGI	TRUE	TRUE	FALSE
cg04380873	chr3	184089743	184089744	THPO	7066	6187	Non-CGI	FALSE	FALSE	TRUE
cg04385976	chr3	8826014	8826015	OXTR	5021	-14713	Non-CGI	FALSE	FALSE	TRUE
cg04387969	chr14	102650356	102650357	WDR20	91833	44166	Non-CGI	FALSE	TRUE	FALSE
cg04388989	chr19	30715606	30715607	ZNF536	9745	-147720	CGI	FALSE	FALSE	TRUE
cg04389950	chr6	106720478	106720479	ATG5	9474	53215	CGI-S-Shelf	FALSE	TRUE	FALSE
cg04393637	chr17	75790091	75790092	FLJ45079	400624	90076	CGI-S-Shore	FALSE	FALSE	TRUE
cg04398610	chr22	20098412	20098413	TRMT2A	27037	6354	Non-CGI	FALSE	TRUE	FALSE
cg04400972	chr1	117665053	117665054	TRIM45	80263	-641	CGI	TRUE	FALSE	FALSE
cg04402803	chr12	56109624	56109625	BLOC1S1-RDH5	100528022	-192	CGI-N-Shore	TRUE	FALSE	FALSE
cg04403868	chr21	44312851	44312852	NDUFV3	4731	-525	CGI	TRUE	FALSE	FALSE
cg04415610	chr13	36432082	36432083	MIR548F5	100302239	83298	Non-CGI	FALSE	TRUE	FALSE
cg04425783	chr14	105915671	105915672	CRIP2	1397	-23670	CGI	FALSE	TRUE	FALSE
cg04426588	chr17	54915771	54915772	DGKE	8526	4310	CGI-S-Shelf	FALSE	TRUE	FALSE
cg04427498	chr7	20830657	20830658	SP8	221833	-4148	CGI	FALSE	FALSE	TRUE
cg04432319	chr20	13200931	13200932	ISM1	140862	-1485	CGI	TRUE	FALSE	FALSE
cg04446724	chr7	157446432	157446433	MIR153-2	406945	-79317	CGI	FALSE	TRUE	FALSE
cg04454285	chr16	86016317	86016318	IRF8	3394	83542	CGI-N-Shore	FALSE	FALSE	TRUE
cg04456238	chr11	32450104	32450105	WT1	7490	6975	CGI	FALSE	TRUE	FALSE
cg04460609	chr4	16532808	16532809	TAPT1-AS1	202020	304521	Non-CGI	FALSE	TRUE	FALSE
cg04461228	chr5	92906678	92906679	FLJ42709	441094	10323	CGI	TRUE	TRUE	FALSE
cg04466022	chr6	37618123	37618124	MDGA1	266727	47641	CGI	FALSE	TRUE	FALSE
cg04466549	chr8	23567747	23567748	NKX2-6	137814	-3635	CGI	FALSE	FALSE	TRUE
cg04467618	chr6	134210946	134210947	TCF21	6943	686	CGI	TRUE	FALSE	FALSE
cg04473763	chr6	88879765	88879766	CNR1	1268	-3997	CGI-S-Shelf	FALSE	FALSE	TRUE
cg04484916	chr16	2801730	2801731	SRRM2	23524	-598	CGI	TRUE	TRUE	FALSE
cg04485850	chr20	60372565	60372566	MIR1257	100302168	156151	CGI-N-Shore	FALSE	TRUE	FALSE
cg04488521	chr5	178487716	178487717	ZNF354C	30832	108	CGI	FALSE	TRUE	FALSE
cg04490596	chr8	32452181	32452182	FUT10	84750	878481	Non-CGI	TRUE	TRUE	FALSE
cg04495270	chr17	17206295	17206296	NT5M	56953	-383	CGI-N-Shore	TRUE	FALSE	FALSE
cg04495687	chr16	15532631	15532632	C16orf45	89927	4305	CGI-S-Shelf	FALSE	TRUE	FALSE
cg04495995	chr7	19147157	19147158	TWIST1	7291	10136	CGI	FALSE	FALSE	TRUE
cg04496895	chr10	30020140	30020141	SVIL	6840	5722	CGI-N-Shelf	FALSE	TRUE	FALSE
cg04504095	chr6	1610688	1610689	FOXC1	2296	6	CGI	TRUE	FALSE	FALSE
cg04508649	chr1	11249046	11249047	ANGPTL7	10218	-350	Non-CGI	TRUE	TRUE	FALSE
cg04512129	chr7	41823437	41823438	INHBA	3624	-80730	Non-CGI	FALSE	FALSE	TRUE
cg04512786	chr10	125652421	125652422	CPXM2	119587	47356	CGI-S-Shore	TRUE	TRUE	FALSE
cg04514047	chr5	10562456	10562457	ANKRD33B	651746	-1977	CGI-N-Shore	TRUE	FALSE	FALSE
cg04521004	chr3	157821262	157821263	SHOX2	6474	2688	CGI	FALSE	TRUE	FALSE
cg04528819	chr7	130418315	130418316	KLF14	136259	571	CGI	TRUE	FALSE	FALSE
cg04538800	chr17	46089331	46089332	MIR152	406943	25280	CGI-N-Shore	FALSE	FALSE	TRUE
cg04539957	chr20	44650068	44650069	SLC12A5	57468	-259	CGI-N-Shore	TRUE	FALSE	FALSE
cg04552921	chr10	80262264	80262265	LINC00856	100132987	253881	Non-CGI	FALSE	TRUE	FALSE
cg04556412	chr7	819902	819903	SUN1	23353	-35290	CGI-S-Shore	FALSE	TRUE	FALSE
cg04563046	chr8	93005307	93005308	RUNX1T1	862	110145	Non-CGI	TRUE	TRUE	FALSE
cg04565255	chr13	77565759	77565760	CLN5	1203	-298	CGI-N-Shore	TRUE	FALSE	FALSE
cg04568981	chr1	53125850	53125851	FAM159A	348378	26783	Non-CGI	FALSE	TRUE	FALSE
cg04586622	chr2	25135609	25135610	ADCY3	109	6444	Non-CGI	FALSE	TRUE	FALSE
cg04588079	chr12	13153012	13153013	HEBP1	50865	229	CGI	TRUE	FALSE	FALSE
cg04596632	chr1	29451471	29451472	TMEM200B	399474	-1049	CGI	TRUE	FALSE	FALSE
cg04606550	chr5	14226569	14226570	TRIO	7204	82739	Non-CGI	FALSE	TRUE	FALSE
cg04607372	chr5	54523900	54523901	MCIN	345643	-756	CGI-S-Shore	TRUE	FALSE	FALSE
cg04609350	chr10	94833102	94833103	CYP26A1	1592	-128	CGI	TRUE	FALSE	FALSE
cg04609952	chr2	16085893	16085894	MYCNOS	10408	-4047	CGI	FALSE	TRUE	FALSE
cg04611395	chr12	2903398	2903399	FKBP4	2288	-708	CGI	TRUE	FALSE	FALSE
cg04612952	chr15	91364242	91364243	FURIN	5045	-47641	CGI-S-Shore	FALSE	FALSE	TRUE
cg04614290	chr19	2327696	2327697	LSM7	51690	916	CGI-N-Shore	TRUE	TRUE	FALSE
cg04617948	chr10	129535138	129535139	FOXI2	399823	-398	CGI	TRUE	FALSE	FALSE
cg04629085	chr4	68334125	68334126	CENPC1	1060	77129	Non-CGI	TRUE	FALSE	FALSE
cg04630848	chr20	62886664	62886665	PCMTD2	55251	-382	CGI-S-Shore	TRUE	FALSE	FALSE
cg04636841	chr7	63768139	63768140	ZNF736	728927	-5045	CGI-S-Shore	FALSE	FALSE	TRUE
cg04639396	chr7	27190539	27190540	HOXA6	3203	-3145	CGI	FALSE	TRUE	FALSE
cg04640865	chr4	176697816	176697817	GPM6A	2823	225830	Non-CGI	FALSE	TRUE	FALSE
cg04640920	chr15	37180889	37180890	LOC145845	145845	-2154	CGI	FALSE	FALSE	TRUE
cg04641400	chr20	273846	273847	C20orf96	140680	-2426	Non-CGI	FALSE	FALSE	TRUE
cg04645421	chr5	108064041	108064042	FER	2241	-19480	CGI	TRUE	FALSE	FALSE
cg04649897	chr8	23571979	23571980	NKX2-6	137814	-7867	CGI	FALSE	FALSE	TRUE
cg04650656	chr10	80007223	80007224	LINC00856	100132987	-1157	CGI-N-Shore	TRUE	FALSE	FALSE
cg04653012	chr16	58163677	58163678	C16orf80	29105	-380	CGI	TRUE	FALSE	FALSE
cg04654118	chr5	172115367	172115368	NEURL1B	54492	47090	CGI-S-Shore	FALSE	TRUE	FALSE
cg04654288	chr6	10390247	10390248	LOC100130275	100130275	-22302	CGI	FALSE	FALSE	TRUE
cg04656101	chr20	44645014	44645015	SLC12A5	57468	-5313	CGI-S-Shore	FALSE	TRUE	FALSE
cg04672210	chr15	99057794	99057795	FAM169B	283777	-182	Non-CGI	TRUE	FALSE	FALSE
cg04673590	chr7	27136191	27136192	HOTAIRM1	100506311	477	CGI	TRUE	TRUE	FALSE
cg04673737	chr1	41830161	41830162	EDN2	1907	120181	CGI-S-Shore	FALSE	FALSE	TRUE
cg04677622	chr3	35679276	35679277	ARPP21	10777	-1803	CGI-N-Shore	TRUE	FALSE	FALSE
cg04682580	chr1	53016396	53016397	ZCCHC11	23318	2732	CGI-N-Shore	FALSE	TRUE	FALSE
cg04684267	chr19	58694502	58694503	ZNF274	10782	105	CGI	TRUE	FALSE	FALSE
cg04686264	chr17	3535998	3535999	SHPK	23729	3616	CGI-N-Shelf	FALSE	TRUE	FALSE
cg04694437	chr5	88185051	88185052	MEF2C	4208	14869	CGI	TRUE	TRUE	FALSE
cg04705318	chr14	100138306	100138307	CYP46A1	10858	-12447	CGI-N-Shelf	FALSE	TRUE	FALSE
cg04707013	chr10	111177826	111177827	XPNPEP1	7511	505483	Non-CGI	FALSE	FALSE	TRUE
cg04723680	chr17	27312855	27312856	SEZ6	124925	20601	CGI-N-Shore	FALSE	TRUE	FALSE
cg04724807	chr14	62396305	62396306	SYT16	83851	-57496	Non-CGI	FALSE	FALSE	TRUE
cg04728402	chr11	62104662	62104663	ASRGL1	80150	-110	CGI-N-Shore	TRUE	FALSE	FALSE
cg04741094	chr3	197209034	197209035	BDH1	622	91158	Non-CGI	FALSE	FALSE	TRUE
cg04741118	chr12	96720813	96720814	CDK17	5128	73551	Non-CGI	FALSE	TRUE	FALSE
cg04743876	chr7	130013617	130013618	CPA1	1357	-6671	Non-CGI	FALSE	FALSE	TRUE
cg04744156	chr2	102865140	102865141	IL1RL2	8808	61706	CGI-N-Shore	FALSE	FALSE	TRUE
cg04745100	chr11	44973110	44973111	TP53I11	9537	-269	CGI-S-Shore	TRUE	FALSE	FALSE
cg04747539	chr6	22887383	22887384	HDGFL1	154150	317704	Non-CGI	FALSE	FALSE	TRUE
cg04772328	chr2	170549930	170549931	CCDC173	129881	999	CGI-N-Shore	TRUE	TRUE	FALSE
cg04785187	chr14	99997549	99997550	CCNK	8812	49809	Non-CGI	FALSE	TRUE	FALSE
cg04787211	chr20	2820954	2820955	VPS16	64601	-417	CGI	TRUE	TRUE	FALSE
cg04787888	chr16	86547322	86547323	FOXF1	2294	3188	CGI	FALSE	TRUE	FALSE
cg04789403	chr15	80271218	80271219	BCL2A1	597	-7574	Non-CGI	FALSE	FALSE	TRUE
cg04789818	chr16	49005567	49005568	CBLN1	869	310173	Non-CGI	FALSE	FALSE	TRUE
cg04792813	chr14	100070043	100070044	CCDC85C	317762	682	CGI	TRUE	FALSE	FALSE
cg04792910	chr15	66652179	66652180	TIPIN	54962	-3124	CGI-S-Shelf	FALSE	FALSE	TRUE
cg04797820	chr12	129460559	129460560	GLT1D1	144423	122477	CGI	FALSE	TRUE	FALSE
cg04804616	chr16	30622014	30622015	ZNF689	115509	-331	CGI-S-Shore	TRUE	FALSE	FALSE
cg04804772	chr10	105238873	105238874	CALHM3	119395	122	Non-CGI	TRUE	FALSE	FALSE
cg04819760	chr10	22765645	22765646	LOC100499489	100499489	-38786	CGI	FALSE	FALSE	TRUE
cg04822330	chr6	126069172	126069173	HEY2	23493	391	CGI-S-Shore	TRUE	TRUE	FALSE
cg04828580	chr10	93639778	93639779	FGFBP3	143282	29478	Non-CGI	FALSE	FALSE	TRUE
cg04830825	chr1	44884264	44884265	RNF220	55182	13303	CGI-S-Shore	FALSE	TRUE	FALSE
cg04834794	chr3	128400154	128400155	RPN1	6184	-235	CGI	TRUE	FALSE	FALSE
cg04837020	chr6	88513713	88513714	AKIRIN2	55122	-101727	Non-CGI	FALSE	TRUE	FALSE
cg04845466	chr2	27665079	27665080	KRTCAP3	200634	-152	CGI	TRUE	TRUE	FALSE
cg04846421	chr1	18800208	18800209	KLHDC7A	127707	-7214	Non-CGI	FALSE	FALSE	TRUE
cg04848660	chr7	41174125	41174126	INHBA-AS1	285954	-559387	Non-CGI	FALSE	FALSE	TRUE
cg04855971	chr4	57299126	57299127	PPAT	5471	2674	CGI-N-Shore	FALSE	TRUE	FALSE
cg04874103	chr6	33872383	33872384	LOC100507584	100507584	-7698	Non-CGI	TRUE	FALSE	FALSE
cg04880546	chr12	120868468	120868469	COX6A1	1337	-7434	Non-CGI	FALSE	FALSE	TRUE
cg04880992	chr1	67434664	67434665	MIER1	57708	44085	Non-CGI	FALSE	TRUE	FALSE
cg04892182	chr1	33231382	33231383	KIAA1522	57648	23869	Non-CGI	TRUE	TRUE	FALSE
cg04892651	chr1	111006966	111006967	CYMP	643160	-9410	Non-CGI	FALSE	FALSE	TRUE
cg04895246	chr8	1153207	1153208	LOC286083	286083	97618	CGI-S-Shore	FALSE	FALSE	TRUE
cg04899656	chr15	62718755	62718756	MGC15885	197003	218623	Non-CGI	FALSE	FALSE	TRUE
cg04903360	chr10	35103065	35103066	PARD3	56288	1186	CGI	FALSE	TRUE	FALSE
cg04903759	chr3	167238645	167238646	SERPINI2	5276	-46826	Non-CGI	FALSE	TRUE	FALSE
cg04907151	chr3	135684161	135684162	PPP2R3A	5523	-352	CGI-N-Shore	TRUE	FALSE	FALSE
cg04912712	chr14	89817982	89817983	FOXN3-AS1	400236	-65714	Non-CGI	FALSE	TRUE	FALSE
cg04913443	chr14	21566084	21566085	TMEM253	643382	-1010	CGI-N-Shore	TRUE	TRUE	FALSE
cg04941018	chr19	36342859	36342860	NPHS1	4868	34	Non-CGI	TRUE	FALSE	FALSE
cg04941706	chr10	14215314	14215315	MIR1265	100302116	-263259	CGI-N-Shore	FALSE	TRUE	FALSE
cg04942832	chr6	73043460	73043461	KCNQ5	56479	-288109	Non-CGI	FALSE	TRUE	FALSE
cg04947052	chr2	128430937	128430938	LIMS2	55679	8421	CGI-N-Shore	FALSE	TRUE	FALSE
cg04947764	chr15	79502127	79502128	MIR184	406960	-1	Non-CGI	TRUE	TRUE	FALSE
cg04949206	chr2	176971971	176971972	HOXD11	3237	2720	CGI-S-Shore	TRUE	TRUE	FALSE
cg04955231	chr5	128431061	128431062	ISOC1	51015	618	CGI-S-Shore	FALSE	TRUE	FALSE
cg04959634	chr7	27219224	27219225	HOXA10-HOXA9	100534589	654	CGI	FALSE	TRUE	FALSE
cg04966191	chr8	133495394	133495395	KCNQ3	3786	-2389	CGI-S-Shore	FALSE	FALSE	TRUE
cg04967982	chr15	31781955	31781956	KLF13	51621	162871	Non-CGI	FALSE	TRUE	FALSE
cg04970352	chr11	44327399	44327400	ALX4	60529	4315	CGI	FALSE	TRUE	FALSE
cg04979933	chr1	67266801	67266802	INSL5	10022	139	Non-CGI	TRUE	FALSE	FALSE
cg04981338	chr1	39897816	39897817	KIAA0754	643314	22639	Non-CGI	FALSE	TRUE	FALSE
cg04984556	chr1	11359053	11359054	UBIAD1	29914	25797	Non-CGI	FALSE	FALSE	TRUE
cg04994481	chr14	65345381	65345382	SPTB	6710	1218	CGI-N-Shore	FALSE	TRUE	FALSE
cg05001932	chr5	126409372	126409373	C5orf63	401207	-187	CGI	TRUE	FALSE	FALSE
cg05007022	chr14	75330462	75330463	PROX2	283571	73	Non-CGI	TRUE	FALSE	FALSE
cg05009601	chr7	121944500	121944501	FEZF1	389549	63	CGI	TRUE	TRUE	FALSE
cg05022087	chr14	62407567	62407568	SYT16	83851	-46234	Non-CGI	FALSE	FALSE	TRUE
cg05032399	chr11	18743376	18743377	IGSF22	283284	4399	CGI	FALSE	TRUE	FALSE
cg05033363	chr16	4237554	4237555	SRL	6345	54525	CGI-S-Shelf	FALSE	FALSE	TRUE
cg05039548	chr1	91190366	91190367	BARHL2	343472	-7571	CGI-S-Shore	FALSE	FALSE	TRUE
cg05057932	chr20	62006836	62006837	CHRNA4	1137	2651	CGI-S-Shore	FALSE	TRUE	FALSE
cg05062333	chr6	133562269	133562270	EYA4	2070	532	CGI	TRUE	TRUE	FALSE
cg05065177	chr1	232094993	232094994	DISC2	27184	-140729	Non-CGI	FALSE	TRUE	FALSE
cg05065572	chr12	114833912	114833913	TBX5-AS1	255480	-12086	CGI	FALSE	TRUE	FALSE
cg05068322	chr6	105405275	105405276	LIN28B	389421	351	CGI-S-Shelf	TRUE	TRUE	FALSE
cg05068777	chr7	127426100	127426101	SND1	27044	133897	Non-CGI	FALSE	TRUE	FALSE
cg05074133	chr4	16686903	16686904	LDB2	9079	213519	Non-CGI	FALSE	TRUE	FALSE
cg05080154	chr18	76739409	76739410	SALL3	27164	-864	CGI	TRUE	FALSE	FALSE
cg05087067	chr14	105715741	105715742	BTBD6	90135	861	CGI	TRUE	TRUE	FALSE
cg05095591	chr3	147129184	147129185	ZIC1	7545	2002	CGI	FALSE	TRUE	FALSE
cg05100419	chr2	237082073	237082074	GBX2	2637	-5420	CGI	FALSE	FALSE	TRUE
cg05118587	chr1	157062170	157062171	ETV3L	440695	7428	Non-CGI	FALSE	TRUE	FALSE
cg05124242	chr4	47845589	47845590	CORIN	10699	-5529	Non-CGI	FALSE	FALSE	TRUE
cg05134926	chr18	30349111	30349112	KLHL14	57565	3861	CGI-N-Shore	FALSE	TRUE	FALSE
cg05142211	chr3	181430485	181430486	SOX2	6657	772	CGI	TRUE	TRUE	FALSE
cg05142272	chr14	24896538	24896539	KHNYN	23351	-1952	CGI-N-Shelf	TRUE	TRUE	FALSE
cg05145297	chr7	75264568	75264569	HIP1	3092	103713	CGI-N-Shelf	FALSE	TRUE	FALSE
cg05148404	chr5	132700446	132700447	MIR1289-2	100302134	62950	Non-CGI	FALSE	TRUE	FALSE
cg05161082	chr12	21680409	21680410	C12orf39	80763	1152	CGI	TRUE	TRUE	FALSE
cg05164926	chr17	7255624	7255625	KCTD11	147040	415	CGI	TRUE	FALSE	FALSE
cg05168491	chr14	38080446	38080447	FOXA1	3169	-15956	CGI	TRUE	FALSE	FALSE
cg05174855	chr16	1592091	1592092	TMEM204	79652	13348	CGI-S-Shore	FALSE	TRUE	FALSE
cg05175353	chr6	596127	596128	HUS1B	135458	60835	CGI	FALSE	TRUE	FALSE
cg05175896	chr12	1749013	1749014	MIR3649	100500816	20531	CGI	FALSE	TRUE	FALSE
cg05182249	chr14	90527985	90527986	KCNK13	56659	-121	CGI	TRUE	FALSE	FALSE
cg05204389	chr7	102937749	102937750	PMPCB	9512	-122	CGI-N-Shore	TRUE	FALSE	FALSE
cg05213896	chr19	50393653	50393654	MIR4750	100616314	2224	CGI	FALSE	TRUE	FALSE
cg05218976	chr19	37958522	37958523	ZNF570	148268	-150	CGI	TRUE	TRUE	FALSE
cg05223487	chr16	1080540	1080541	SSTR5	6755	-42214	CGI	FALSE	FALSE	TRUE
cg05224015	chr7	158235423	158235424	MIR595	693180	90080	CGI-N-Shore	FALSE	TRUE	FALSE
cg05229759	chr11	122562201	122562202	UBASH3B	84959	35802	Non-CGI	FALSE	TRUE	FALSE
cg05229989	chr17	49724713	49724714	UTP18	51096	386815	Non-CGI	FALSE	TRUE	FALSE
cg05236677	chr8	99952217	99952218	STK3	6788	2654	CGI	FALSE	TRUE	FALSE
cg05237374	chr14	66980127	66980128	GPHN	10243	6001	CGI-S-Shelf	FALSE	TRUE	FALSE
cg05243070	chr14	87253396	87253397	LOC283585	283585	-118724	Non-CGI	FALSE	FALSE	TRUE
cg05243804	chr18	55254238	55254239	FECH	2235	-268	CGI-S-Shore	TRUE	FALSE	FALSE
cg05245650	chr2	37900205	37900206	CDC42EP3	10602	-878	CGI-S-Shore	TRUE	FALSE	FALSE
cg05246530	chr16	70441937	70441938	ST3GAL2	6483	31052	Non-CGI	FALSE	TRUE	FALSE
cg05250458	chr19	9473565	9473566	ZNF177	7730	-129	CGI-N-Shore	TRUE	TRUE	FALSE
cg05260236	chr16	86552258	86552259	FOXF1	2294	8124	CGI-S-Shore	FALSE	FALSE	TRUE
cg05265306	chr17	57784459	57784460	PTRH2	51651	395	CGI	TRUE	TRUE	FALSE
cg05266781	chr16	54965492	54965493	IRX5	10265	380	CGI	TRUE	TRUE	FALSE
cg05284742	chr14	93552128	93552129	ITPK1-AS1	319085	18330	Non-CGI	FALSE	TRUE	FALSE
cg05295286	chr6	7234581	7234582	SSR1	6745	78958	CGI-S-Shelf	FALSE	TRUE	FALSE
cg05296643	chr12	54410526	54410527	HOXC4	3221	-114	CGI	TRUE	FALSE	FALSE
cg05310185	chr10	123951483	123951484	BTBD16	118663	-79336	Non-CGI	TRUE	TRUE	FALSE
cg05310774	chr12	58259554	58259555	CTDSP2	10106	-18806	CGI-S-Shore	FALSE	FALSE	TRUE
cg05323533	chr4	41750362	41750363	PHOX2B	8929	623	CGI-S-Shore	FALSE	TRUE	FALSE
cg05323725	chr17	35294713	35294714	LHX1	3975	-57	CGI-S-Shore	TRUE	FALSE	FALSE
cg05333146	chr16	67183725	67183726	B3GNT9	84752	1175	CGI	TRUE	TRUE	FALSE
cg05342515	chr2	177024172	177024173	HOXD3	3232	-4631	CGI	FALSE	FALSE	TRUE
cg05346832	chr19	10680117	10680118	CDKN2D	1032	-461	CGI	TRUE	FALSE	FALSE
cg05347216	chr16	1193884	1193885	CACNA1H	8912	-9355	CGI-S-Shore	FALSE	FALSE	TRUE
cg05364487	chr12	125659025	125659026	AACS	65985	109099	Non-CGI	FALSE	FALSE	TRUE
cg05368730	chr12	132657879	132657880	NOC4L	79050	28885	CGI	FALSE	FALSE	TRUE
cg05369318	chr9	101017574	101017575	TBC1D2	55357	427	CGI	TRUE	FALSE	FALSE
cg05371578	chr3	147128157	147128158	ZIC1	7545	975	CGI	TRUE	FALSE	FALSE
cg05373792	chr13	27648047	27648048	USP12	219333	97984	Non-CGI	FALSE	TRUE	FALSE
cg05377162	chr1	185286996	185286997	IVNS1ABP	10625	-534	CGI	TRUE	FALSE	FALSE
cg05378199	chr15	34502494	34502495	KATNBL1	79768	-196	CGI	TRUE	FALSE	FALSE
cg05383328	chr12	123471521	123471522	ARL6IP4	51329	6640	CGI-S-Shore	FALSE	TRUE	FALSE
cg05386769	chr2	218681558	218681559	DIRC3	729582	-60241	Non-CGI	FALSE	TRUE	FALSE
cg05387167	chr17	46629804	46629805	HOXB2	3212	-7410	CGI	TRUE	TRUE	FALSE
cg05396178	chr6	27833129	27833130	HIST1H2AL	8332	21	CGI-S-Shore	TRUE	FALSE	FALSE
cg05396688	chr3	99645672	99645673	MIR3921	100500859	37568	Non-CGI	FALSE	TRUE	FALSE
cg05398141	chr14	53797709	53797710	DDHD1	80821	-177662	Non-CGI	FALSE	FALSE	TRUE
cg05399036	chr3	71569437	71569438	MIR1284	100302112	21801	Non-CGI	FALSE	TRUE	FALSE
cg05405572	chr16	79804837	79804838	MAF	4094	-170214	CGI-S-Shore	FALSE	FALSE	TRUE
cg05409419	chr14	30953702	30953703	G2E3	55632	-74625	Non-CGI	FALSE	FALSE	TRUE
cg05409596	chr17	38519841	38519842	GJD3	125111	1102	CGI	TRUE	TRUE	FALSE
cg05412333	chr8	11560838	11560839	GATA4	2626	26369	CGI	TRUE	TRUE	FALSE
cg05412990	chr2	20190169	20190170	WDR35	57539	-284	CGI	TRUE	FALSE	FALSE
cg05414338	chr6	26250347	26250348	HIST1H3F	8968	486	CGI-N-Shore	TRUE	FALSE	FALSE
cg05425754	chr5	54528249	54528250	CCNO	10309	1257	CGI	FALSE	TRUE	FALSE
cg05428706	chr10	102730130	102730131	SEMA4G	57715	849	CGI-S-Shore	FALSE	TRUE	FALSE
cg05431171	chr6	35461405	35461406	TEAD3	7005	3454	CGI	FALSE	TRUE	FALSE
cg05432973	chr10	101292651	101292652	NKX2-3	159296	-37	CGI	TRUE	FALSE	FALSE
cg05444548	chr10	75119064	75119065	TTC18	118491	-446	CGI-S-Shore	TRUE	FALSE	FALSE
cg05444816	chr11	2162406	2162407	IGF2-AS	51214	647	CGI	TRUE	TRUE	FALSE
cg05457768	chr6	28751790	28751791	LOC401242	401242	79662	CGI-N-Shelf	FALSE	FALSE	TRUE
cg05465032	chr16	4658987	4658988	UBALD1	124402	5938	CGI-N-Shore	FALSE	TRUE	FALSE
cg05467106	chr16	30621996	30621997	ZNF689	115509	-313	CGI-S-Shore	TRUE	FALSE	FALSE
cg05467160	chr2	176945526	176945527	EVX2	344191	3162	CGI	FALSE	TRUE	FALSE
cg05468024	chr19	1748710	1748711	ONECUT3	390874	-4950	CGI-S-Shore	FALSE	FALSE	TRUE
cg05469285	chr11	20178979	20178980	DBX1	120237	2889	CGI	FALSE	TRUE	FALSE
cg05469695	chr2	37899953	37899954	CDC42EP3	10602	-626	CGI	TRUE	FALSE	FALSE
[truncated: 4,007 more rows]
