# Supplementary material for: H3K4me1 marks DNA regions hypomethylated during aging in human stem and differentiated cells
Source: HighWire-hosted journal article supplement (doi:10.1101/gr.169011.113), 2014-09-30
Supplement: Supplemental_Table_5.xlsx [file Supplemental_Table_5.xlsx]

## Sheet: Blood
Supplemental Table5: List of CpG sites hypomethylated in blood during aging
Target ID	Chromosome	start	end	nearest.gene	nearest.gene.id	disttotss	hmm.cpgi	prom.reg	intra.reg	inter.reg
cg10501210	chr1	207997020	207997021	LOC148696	148696	5295	CGI-N-Shore	TRUE	FALSE	FALSE
cg08234504	chr5	139013317	139013318	CXXC5	51523	-14982	CGI-N-Shelf	FALSE	FALSE	TRUE
cg16054275	chr1	169556022	169556023	F5	2153	-252	Non-CGI	TRUE	FALSE	FALSE
cg02085953	chr2	97202260	97202261	ARID5A	10865	-202	CGI-N-Shore	TRUE	FALSE	FALSE
cg18651026	chr6	33140660	33140661	COL11A2	1302	19583	Non-CGI	FALSE	TRUE	FALSE
cg19283806	chr18	66389420	66389421	CCDC102B	79839	6928	Non-CGI	FALSE	TRUE	FALSE
cg07082267	chr16	85429035	85429036	LOC727710	727710	-92032	CGI-S-Shore	FALSE	FALSE	TRUE
cg25994988	chr11	122652382	122652383	CRTAM	56253	-56871	Non-CGI	FALSE	TRUE	FALSE
cg20822990	chr1	17338766	17338767	ATP13A2	23400	-342	CGI-S-Shore	TRUE	FALSE	FALSE
cg11436113	chr20	19191145	19191146	SLC24A3	57419	-2143	CGI-N-Shore	FALSE	FALSE	TRUE
cg22796704	chr10	49673534	49673535	MAPK8	5599	158747	CGI-N-Shore	FALSE	TRUE	FALSE
cg05308819	chr1	155959156	155959157	ARHGEF2	9181	706	CGI-S-Shore	TRUE	TRUE	FALSE
cg01528542	chr12	81468232	81468233	ACSS3	79611	-3575	CGI-N-Shelf	FALSE	FALSE	TRUE
cg08128734	chr1	206685423	206685424	RASSF5	83593	4543	Non-CGI	FALSE	TRUE	FALSE
cg11649376	chr12	81473234	81473235	ACSS3	79611	1424	CGI-S-Shore	FALSE	TRUE	FALSE
cg06474661	chr17	48239271	48239272	SGCA	6442	-4093	CGI	FALSE	FALSE	TRUE
cg01820374	chr12	6882083	6882084	LAG3	3902	412	CGI-N-Shore	TRUE	TRUE	FALSE
cg08262002	chr4	16575323	16575324	LDB2	9079	325099	Non-CGI	FALSE	TRUE	FALSE
cg18618815	chr17	48275324	48275325	COL1A1	1277	3674	CGI-N-Shore	FALSE	TRUE	FALSE
cg07583137	chr8	82644012	82644013	CHMP4C	92421	-674	CGI-N-Shore	TRUE	FALSE	FALSE
cg03735592	chr6	138821354	138821355	MIR3145	100423001	-64922	Non-CGI	TRUE	TRUE	FALSE
cg09809672	chr1	236557682	236557683	EDARADD	128178	1	CGI-N-Shore	TRUE	FALSE	FALSE
cg15804973	chr6	137114513	137114514	MAP3K5	4217	-856	CGI-S-Shore	TRUE	FALSE	FALSE
cg16008966	chr1	114761794	114761795	SYT6	148281	-65321	Non-CGI	FALSE	FALSE	TRUE
cg03431918	chr17	77716367	77716368	ENPP7	339221	11484	CGI-S-Shore	FALSE	FALSE	TRUE
cg24711336	chr10	80063791	80063792	LINC00856	100132987	55408	CGI-S-Shore	FALSE	TRUE	FALSE
cg19433091	chr15	43426498	43426499	TMEM62	80021	775	CGI-S-Shore	TRUE	TRUE	FALSE
cg06874016	chr17	40177415	40177416	DNAJC7	7266	-7699	Non-CGI	FALSE	TRUE	FALSE
cg16604658	chr12	64847188	64847189	TBK1	29110	1347	CGI-S-Shore	FALSE	TRUE	FALSE
cg04193015	chr17	35596680	35596681	C17orf78	284099	-136303	Non-CGI	FALSE	TRUE	FALSE
cg01974375	chr1	151298954	151298955	PI4KB	5298	1235	CGI-N-Shore	FALSE	TRUE	FALSE
cg26969888	chr19	14064254	14064255	PODNL1	79883	-49	CGI-S-Shore	TRUE	TRUE	FALSE
cg17457912	chr17	1617102	1617103	MIR22	407004	177	CGI-N-Shore	TRUE	TRUE	FALSE
cg20116935	chr3	50303757	50303758	SEMA3B	7869	-1281	Non-CGI	TRUE	FALSE	FALSE
cg16932827	chr3	193988639	193988640	LOC100131551	100131551	41952	CGI-S-Shore	FALSE	FALSE	TRUE
cg07931844	chr15	72102213	72102214	NR2E3	10002	-679	Non-CGI	TRUE	FALSE	FALSE
cg03473532	chr7	131008743	131008744	MKLN1	4289	213887	CGI-N-Shelf	FALSE	TRUE	FALSE
cg07080372	chr11	796607	796608	SLC25A22	79751	1660	CGI-N-Shore	TRUE	TRUE	FALSE
cg11693709	chr15	40542019	40542020	C15orf56	644809	3089	CGI-N-Shelf	FALSE	TRUE	FALSE
cg06685111	chr6	30295466	30295467	HCG18	414777	-538	CGI-S-Shore	TRUE	TRUE	FALSE
cg04999352	chr11	63304614	63304615	RARRES3	5920	340	Non-CGI	FALSE	TRUE	FALSE
cg00193668	chr9	35814283	35814284	HINT2	84681	757	CGI-S-Shore	FALSE	TRUE	FALSE
cg03474926	chr9	136023407	136023408	GBGT1	26301	15892	CGI-N-Shore	FALSE	TRUE	FALSE
cg00753885	chr12	57401797	57401798	ZBTB39	9880	-1499	CGI-S-Shore	TRUE	FALSE	FALSE
cg04474832	chr3	52008487	52008488	ABHD14A-ACY1	100526760	-553	CGI	TRUE	TRUE	FALSE
cg23744638	chr11	10323902	10323903	ADM	133	-2738	CGI-N-Shore	FALSE	FALSE	TRUE
cg18993949	chr4	15481269	15481270	CC2D2A	57545	9779	Non-CGI	FALSE	TRUE	FALSE
cg22016779	chr2	230452311	230452312	DNER	92737	126973	Non-CGI	TRUE	TRUE	FALSE
cg18933331	chr1	110186418	110186419	GSTM2	2946	-12278	CGI-S-Shore	FALSE	FALSE	TRUE
cg03725309	chr1	109757585	109757586	SARS	6301	1069	CGI-S-Shore	FALSE	TRUE	FALSE
cg01894846	chr14	100752463	100752464	SLC25A29	123096	20395	CGI-S-Shore	FALSE	FALSE	TRUE
cg20052760	chr6	10510789	10510790	GCNT2	2651	18332	Non-CGI	FALSE	TRUE	FALSE
cg25838150	chr11	77259596	77259597	AQP11	282679	-40838	Non-CGI	FALSE	FALSE	TRUE
cg04208403	chr16	49525807	49525808	C16orf78	123970	117998	CGI-S-Shore	FALSE	TRUE	FALSE
cg11826475	chr12	120704006	120704007	PXN	5829	-431	CGI-S-Shore	TRUE	FALSE	FALSE
cg22747507	chr4	175635801	175635802	GLRA3	8001	114662	Non-CGI	FALSE	TRUE	FALSE
cg18826637	chr2	145116633	145116634	GTDC1	79712	-26549	Non-CGI	FALSE	FALSE	TRUE
cg22927302	chr3	50304463	50304464	SEMA3B	7869	-575	Non-CGI	TRUE	FALSE	FALSE
cg22512670	chr1	26855765	26855766	RPS6KA1	6195	-482	CGI-N-Shore	TRUE	FALSE	FALSE
cg23078123	chr1	68577796	68577797	DIRAS3	9077	-61314	Non-CGI	FALSE	TRUE	FALSE
cg01234420	chr22	46453808	46453809	C22orf26	55267	-3783	CGI-S-Shelf	TRUE	TRUE	FALSE
cg21524899	chr1	225662606	225662607	LBR	3930	-46048	CGI-S-Shore	FALSE	FALSE	TRUE
cg02838877	chr13	97873877	97873878	MBNL2	10150	-695	Non-CGI	TRUE	FALSE	FALSE
cg13388731	chr2	220143225	220143226	DNAJB2	3300	-813	CGI-N-Shore	TRUE	FALSE	FALSE
cg04955914	chr2	220040571	220040572	CNPPD1	27013	2159	CGI-N-Shore	FALSE	TRUE	FALSE
cg23341182	chr10	102046768	102046769	BLOC1S2	282991	-328	CGI-S-Shore	TRUE	FALSE	FALSE
cg08415592	chr22	36648973	36648974	APOL1	8542	-142	Non-CGI	TRUE	FALSE	FALSE
cg20747538	chr3	137838021	137838022	DZIP1L	199221	-3569	CGI-S-Shelf	FALSE	FALSE	TRUE
cg26153045	chr7	73441834	73441835	ELN	2006	-591	CGI-N-Shore	TRUE	FALSE	FALSE
cg10247798	chr3	52008826	52008827	ABHD14A-ACY1	100526760	-214	CGI	TRUE	TRUE	FALSE
cg02402091	chr10	114135092	114135093	ACSL5	51703	1175	Non-CGI	TRUE	TRUE	FALSE
cg13823169	chr9	139776893	139776894	TRAF2	7186	507	CGI-N-Shelf	FALSE	TRUE	FALSE
cg06240854	chr2	99771011	99771012	TSGA10	80705	174	CGI-N-Shore	TRUE	TRUE	FALSE
cg05725703	chr3	46906118	46906119	MYL3	4634	-1144	Non-CGI	TRUE	FALSE	FALSE
cg14195318	chr12	53644994	53644995	MFSD5	84975	-374	CGI-N-Shore	TRUE	FALSE	FALSE
cg09748749	chr7	65540429	65540430	ASL	435	-345	CGI-N-Shore	TRUE	FALSE	FALSE
cg18587063	chr11	122940457	122940458	HSPA8	3312	-7270	Non-CGI	FALSE	FALSE	TRUE
cg23718736	chr18	6413908	6413909	L3MBTL4	91133	1000	CGI-N-Shore	FALSE	TRUE	FALSE
cg22156456	chr17	39844239	39844240	EIF1	10209	-886	CGI-N-Shore	TRUE	TRUE	FALSE
cg07568841	chr7	30362781	30362782	MIR550B1	100500883	-33274	Non-CGI	FALSE	TRUE	FALSE
cg26325867	chr6	41398693	41398694	NCR2	9436	95164	CGI-S-Shelf	FALSE	FALSE	TRUE
cg13033938	chr3	49824475	49824476	IP6K1	9807	-501	CGI-S-Shore	TRUE	FALSE	FALSE
cg04604946	chr12	7023352	7023353	ENO2	2026	-260	CGI	TRUE	TRUE	FALSE
cg20515136	chr3	159707145	159707146	IL12A	3592	521	CGI-S-Shore	FALSE	TRUE	FALSE
cg00101260	chr17	53426657	53426658	MMD	23531	72682	Non-CGI	FALSE	FALSE	TRUE
cg08015382	chr6	12365899	12365900	EDN1	1906	75369	Non-CGI	FALSE	FALSE	TRUE
cg25256723	chr1	169555944	169555945	F5	2153	-174	Non-CGI	TRUE	FALSE	FALSE
cg09636661	chr16	69743901	69743902	NQO1	1728	16630	Non-CGI	FALSE	TRUE	FALSE
cg19578183	chr2	128991530	128991531	HS6ST1	9394	84639	CGI-S-Shore	FALSE	FALSE	TRUE
cg20964856	chr19	41767669	41767670	HNRNPUL1	11100	-720	CGI-N-Shore	TRUE	TRUE	FALSE
cg00876267	chr9	139588516	139588517	AGPAT2	10555	-6604	CGI-S-Shore	FALSE	FALSE	TRUE
cg21874213	chr5	139229292	139229293	PSD2	84249	53885	CGI-S-Shore	FALSE	TRUE	FALSE
cg17372101	chr7	147500722	147500723	MIR548I4	100302191	-245759	CGI-S-Shore	FALSE	TRUE	FALSE
cg12776156	chr11	848044	848045	TSPAN4	7106	5219	CGI-N-Shore	FALSE	TRUE	FALSE
cg10628205	chr1	61547131	61547132	NFIA	4774	4184	CGI-N-Shore	TRUE	TRUE	FALSE
cg17168836	chr1	68256161	68256162	GNG12-AS1	100289178	-41808	Non-CGI	FALSE	TRUE	FALSE
cg10424974	chr16	66388348	66388349	CDH5	1003	-12175	Non-CGI	FALSE	FALSE	TRUE
cg27151122	chr12	50447407	50447408	ASIC1	41	-4078	CGI-S-Shelf	FALSE	FALSE	TRUE
cg09168222	chr4	89299733	89299734	HERC6	55008	-156	CGI-N-Shore	TRUE	FALSE	FALSE
cg18306747	chr15	74284008	74284009	STOML1	9399	625	CGI-N-Shore	FALSE	TRUE	FALSE
cg04416734	chr16	30075192	30075193	ALDOA	226	10780	CGI-N-Shore	TRUE	TRUE	FALSE
cg24057710	chr11	126311095	126311096	ST3GAL4	6484	85554	CGI-S-Shore	FALSE	TRUE	FALSE
cg10001186	chr11	94882829	94882830	ENDOD1	23052	59854	CGI-N-Shore	TRUE	FALSE	FALSE
cg01554474	chr1	155107599	155107600	SLC50A1	55974	-687	CGI-N-Shore	TRUE	FALSE	FALSE
cg25818109	chr3	186937654	186937655	RTP1	132112	22379	Non-CGI	FALSE	TRUE	FALSE
cg22361181	chr17	40171740	40171741	DNAJC7	7266	-2024	CGI-N-Shore	TRUE	TRUE	FALSE
cg23186333	chr11	35161900	35161901	CD44	960	1482	CGI-S-Shore	FALSE	TRUE	FALSE
cg00486113	chr6	31105711	31105712	PSORS1C2	170680	1414	Non-CGI	FALSE	TRUE	FALSE
cg19913291	chr6	30295432	30295433	HCG18	414777	-504	CGI-S-Shore	TRUE	TRUE	FALSE
cg13135455	chr2	241860318	241860319	C2orf54	79919	-24744	CGI-S-Shore	FALSE	FALSE	TRUE
cg08090640	chr17	41159289	41159290	IFI35	3430	546	Non-CGI	FALSE	TRUE	FALSE
cg01486610	chr8	42749175	42749176	MIR4469	100616115	2241	CGI-N-Shelf	FALSE	TRUE	FALSE
cg22379463	chr3	45260330	45260331	TMEM158	25907	7482	Non-CGI	FALSE	FALSE	TRUE
cg23368715	chr12	7245510	7245511	C1R	715	-466	Non-CGI	TRUE	FALSE	FALSE
cg01812894	chr9	75568506	75568507	ALDH1A1	216	126850	Non-CGI	TRUE	TRUE	FALSE
cg26673195	chr17	41052729	41052730	G6PC	2538	-84	Non-CGI	TRUE	FALSE	FALSE
cg24883498	chr19	18264771	18264772	PIK3R2	5296	754	CGI	TRUE	TRUE	FALSE
cg20188739	chr8	67834756	67834757	SNORD87	641648	26	CGI-N-Shelf	TRUE	TRUE	FALSE
cg17721618	chr15	42376692	42376693	PLA2G4D	283748	10058	Non-CGI	FALSE	TRUE	FALSE
cg05405914	chr16	8972233	8972234	CARHSP1	23589	-9369	Non-CGI	FALSE	FALSE	TRUE
cg15121420	chr2	238490819	238490820	RAB17	64284	8948	Non-CGI	FALSE	TRUE	FALSE
cg21448513	chr8	57103638	57103639	PLAG1	5324	20219	Non-CGI	FALSE	TRUE	FALSE
cg11076306	chr4	41430667	41430668	LIMCH1	22998	67862	Non-CGI	FALSE	TRUE	FALSE
cg19936954	chr1	180148192	180148193	FLJ23867	200058	-18950	Non-CGI	TRUE	TRUE	FALSE
cg26614073	chr3	47517819	47517820	SCAP	22937	-373	CGI-S-Shore	TRUE	FALSE	FALSE
cg17183905	chr12	110253842	110253843	MIR4497	100616454	-17309	Non-CGI	TRUE	TRUE	FALSE
cg05619598	chr19	33569228	33569229	GPATCH1	55094	-2556	CGI-N-Shelf	FALSE	FALSE	TRUE
cg17436656	chr12	53627106	53627107	RARG	5916	-1065	CGI-S-Shore	TRUE	FALSE	FALSE
cg19056004	chr12	7023262	7023263	ENO2	2026	-350	CGI-N-Shore	TRUE	TRUE	FALSE
cg18034299	chr5	172359680	172359681	LOC100268168	100268168	26689	Non-CGI	TRUE	TRUE	FALSE
cg20988565	chr8	106334333	106334334	ZFPM2	23414	3185	CGI-S-Shelf	FALSE	TRUE	FALSE
cg10149533	chr4	154064784	154064785	TRIM2	23321	-9484	Non-CGI	FALSE	FALSE	TRUE
cg18448426	chr22	36648832	36648833	APOL1	8542	-283	Non-CGI	TRUE	FALSE	FALSE
cg14188401	chr3	134097684	134097685	AMOTL2	51421	-3424	CGI-S-Shelf	FALSE	FALSE	TRUE
cg08761208	chr15	65693289	65693290	IGDCC4	57722	22119	CGI-S-Shelf	FALSE	TRUE	FALSE
cg24212517	chr17	42428168	42428169	GRN	2896	5676	CGI-N-Shelf	TRUE	TRUE	FALSE
cg17593342	chr6	14037614	14037615	CD83	9308	-79871	Non-CGI	FALSE	FALSE	TRUE
cg12483947	chr10	72640100	72640101	PCBD1	5092	8439	Non-CGI	FALSE	TRUE	FALSE
cg24847230	chr17	46986807	46986808	UBE2Z	65264	1075	CGI-S-Shore	FALSE	TRUE	FALSE
cg08810238	chr17	27225046	27225047	FLOT2	2319	-330	CGI-S-Shore	TRUE	TRUE	FALSE
cg18215449	chr12	66089473	66089474	HMGA2	8091	-127962	Non-CGI	FALSE	FALSE	TRUE
cg10277912	chr17	7216033	7216034	EIF5A	1984	5714	CGI-N-Shelf	FALSE	TRUE	FALSE
cg21943117	chr1	2840308	2840309	ACTRT2	140625	-97736	CGI-S-Shore	FALSE	FALSE	TRUE
cg05490029	chr8	79719015	79719016	IL7	3574	-1256	CGI-S-Shore	TRUE	FALSE	FALSE
cg15297650	chr2	135477056	135477057	TMEM163	81615	48276	CGI-S-Shore	TRUE	TRUE	FALSE
cg04436528	chr8	143554875	143554876	BAI1	575	9497	CGI-N-Shore	FALSE	TRUE	FALSE
cg06567855	chr2	85977911	85977912	ATOH8	84913	-2996	CGI-N-Shelf	FALSE	FALSE	TRUE
cg16201146	chr20	19191526	19191527	SLC24A3	57419	-1762	CGI-N-Shore	TRUE	FALSE	FALSE
cg10772169	chr1	100315213	100315214	AGL	178	-425	CGI-N-Shore	TRUE	FALSE	FALSE
cg19500607	chr5	148034319	148034320	HTR4	3360	10975	CGI-S-Shore	TRUE	TRUE	FALSE
cg21301148	chr14	23878195	23878196	MYH6	4624	-708	Non-CGI	TRUE	FALSE	FALSE
cg08468401	chr3	14303131	14303132	LSM3	27258	82902	Non-CGI	FALSE	FALSE	TRUE
cg01243823	chr16	50732212	50732213	NOD2	64127	4697	Non-CGI	FALSE	TRUE	FALSE
cg13501527	chr9	123640474	123640475	PHF19	26147	-867	CGI-S-Shore	TRUE	FALSE	FALSE
cg21922223	chr17	75539118	75539119	LOC100507351	100507351	-3903	CGI-S-Shore	FALSE	FALSE	TRUE
cg26748477	chr17	38516415	38516416	GJD3	125111	4528	CGI-N-Shore	TRUE	TRUE	FALSE
cg27269561	chr16	3072713	3072714	THOC6	79228	-1317	CGI-S-Shore	TRUE	TRUE	FALSE
cg04581938	chr6	31364999	31365000	MICA	100507436	-2560	CGI-N-Shelf	FALSE	FALSE	TRUE
cg02513379	chr16	27414281	27414282	IL21R	50615	797	Non-CGI	FALSE	TRUE	FALSE
cg15730857	chr7	116592968	116592969	ST7	7982	-411	CGI-N-Shore	TRUE	FALSE	FALSE
cg27015931	chr16	22012404	22012405	PDZD9	255762	25	Non-CGI	TRUE	FALSE	FALSE
cg19722847	chr12	30849114	30849115	IPO8	10526	-184	CGI-S-Shore	TRUE	FALSE	FALSE
cg23753748	chr10	105212808	105212809	CALHM2	51063	-149	CGI-S-Shore	TRUE	FALSE	FALSE
cg07101980	chr11	77780019	77780020	THRSP	7069	5111	Non-CGI	FALSE	TRUE	FALSE
cg21469505	chr18	47085749	47085750	LIPG	9388	-2676	CGI-N-Shore	FALSE	FALSE	TRUE
cg19761273	chr17	80232096	80232097	CSNK1D	1453	-501	CGI-S-Shore	TRUE	FALSE	FALSE
cg17471102	chr19	5851255	5851256	FUT3	2525	228	CGI-N-Shore	FALSE	TRUE	FALSE
cg03337035	chr19	42258336	42258337	CEACAM6	4680	-1060	Non-CGI	TRUE	FALSE	FALSE
cg00695112	chr9	71862747	71862748	FAM189A2	9413	-76739	CGI-N-Shore	FALSE	TRUE	FALSE
cg16983588	chr11	129793108	129793109	NFRKB	4798	-27617	Non-CGI	FALSE	TRUE	FALSE
cg26935102	chr1	145470946	145470947	ANKRD34A	284615	437	CGI-S-Shore	TRUE	TRUE	FALSE
cg23836737	chr4	53411703	53411704	USP46	64854	113797	Non-CGI	FALSE	FALSE	TRUE
cg16193278	chr13	100008450	100008451	MIR623	693208	64	Non-CGI	TRUE	TRUE	FALSE
cg13370427	chr22	40743980	40743981	ADSL	158	1475	CGI-S-Shore	FALSE	TRUE	FALSE
cg16765088	chr15	99640471	99640472	SYNM	23336	-4813	CGI-N-Shore	FALSE	FALSE	TRUE
cg19453093	chr14	88655985	88655986	KCNK10	54207	137269	CGI-S-Shelf	FALSE	TRUE	FALSE
cg23534245	chr20	6751435	6751436	BMP2	650	2689	CGI-S-Shore	FALSE	TRUE	FALSE
cg15110296	chr12	12509705	12509706	LOH12CR2	503693	294	CGI-N-Shore	TRUE	TRUE	FALSE
cg05373251	chr17	79451985	79451986	ACTG1	71	27905	CGI-S-Shore	FALSE	FALSE	TRUE
cg03746976	chr16	58035805	58035806	USB1	79650	527	CGI-S-Shore	FALSE	TRUE	FALSE
cg21186955	chr7	100729412	100729413	TRIM56	81844	625	CGI-N-Shore	TRUE	TRUE	FALSE
cg22929506	chr2	219137490	219137491	PNKD	25953	2374	CGI-S-Shore	FALSE	TRUE	FALSE
cg01201215	chr5	151137430	151137431	ATOX1	475	778	CGI-N-Shore	TRUE	TRUE	FALSE
cg11331344	chr17	73629463	73629464	SMIM5	643008	-49	CGI-S-Shore	TRUE	TRUE	FALSE
cg11741201	chr11	35638398	35638399	FJX1	24147	-1335	CGI-N-Shore	TRUE	FALSE	FALSE
cg06445343	chr7	94538403	94538404	PPP1R9A	55607	1453	CGI-S-Shore	TRUE	TRUE	FALSE
cg13767625	chr9	135848623	135848624	GFI1B	8328	-5269	CGI	FALSE	FALSE	TRUE
cg02867102	chr17	62398693	62398694	PECAM1	5175	8388	CGI	FALSE	TRUE	FALSE
cg00636737	chr20	62695569	62695570	TCEA2	6919	7393	CGI-S-Shore	FALSE	TRUE	FALSE
cg16762684	chr18	74820493	74820494	MBP	4155	24279	CGI-N-Shelf	FALSE	TRUE	FALSE
cg09706243	chr11	67121634	67121635	POLD4	57804	-581	CGI-S-Shore	TRUE	TRUE	FALSE
cg01502244	chr17	78188904	78188905	SGSH	6448	5293	CGI	FALSE	TRUE	FALSE
cg10941749	chr15	52030519	52030520	LYSMD2	256586	13129	CGI-S-Shore	TRUE	TRUE	FALSE
cg05207048	chr5	167513456	167513457	WWC1	23286	-205607	Non-CGI	FALSE	TRUE	FALSE
cg26894354	chr1	203311314	203311315	FMOD	2331	8973	Non-CGI	FALSE	TRUE	FALSE
cg16541026	chr3	49026934	49026935	P4HTM	54681	-405	CGI-N-Shore	TRUE	FALSE	FALSE
cg19758448	chr17	37828296	37828297	PNMT	5409	3788	CGI-S-Shelf	FALSE	TRUE	FALSE
cg08453194	chr6	41904398	41904399	BYSL	705	15432	CGI-N-Shelf	FALSE	TRUE	FALSE
cg22947000	chr16	81272281	81272282	BCMO1	53630	-13	Non-CGI	TRUE	FALSE	FALSE
cg13203811	chr12	58136245	58136246	AGAP2	116986	-300	CGI-S-Shelf	TRUE	FALSE	FALSE
cg27219955	chr15	89377583	89377584	ACAN	176	30908	Non-CGI	FALSE	TRUE	FALSE
cg20267101	chr3	113006232	113006233	BOC	91653	75819	Non-CGI	FALSE	TRUE	FALSE
ch.2.30415474F	chr2	30561970	30561972	LBH	81606	107572	Non-CGI	FALSE	FALSE	TRUE
cg01022345	chr14	101317819	101317820	MIR770	768222	-906	Non-CGI	TRUE	TRUE	FALSE
cg16810343	chr7	75898970	75898971	HSPB1	3315	-32903	CGI-S-Shelf	FALSE	TRUE	FALSE
cg13039251	chr5	32018601	32018602	MIR4279	100422874	-82335	Non-CGI	FALSE	TRUE	FALSE
cg17136255	chr7	2516929	2516930	LFNG	3955	-35232	CGI-N-Shore	FALSE	FALSE	TRUE
cg03359540	chr6	2750213	2750214	MYLK4	340156	939	Non-CGI	FALSE	TRUE	FALSE
cg14950321	chr19	4530233	4530234	LRG1	116844	9801	CGI-N-Shore	FALSE	TRUE	FALSE
cg16744741	chr4	82126025	82126026	PRKG2	5593	10191	Non-CGI	TRUE	TRUE	FALSE
cg14058848	chr9	130479114	130479115	TTC16	158248	755	CGI-S-Shore	TRUE	TRUE	FALSE
cg19753867	chr20	35383166	35383167	NDRG3	57446	-8624	Non-CGI	FALSE	TRUE	FALSE
cg04500377	chr8	38090208	38090209	DDHD2	23259	1198	CGI-S-Shore	TRUE	TRUE	FALSE
cg22793142	chr1	207995752	207995753	LOC148696	148696	4027	CGI-N-Shore	TRUE	FALSE	FALSE
cg20816447	chr4	15480781	15480782	CC2D2A	57545	9291	Non-CGI	TRUE	TRUE	FALSE
cg10117719	chr1	36181173	36181174	C1orf216	127703	3615	CGI-N-Shelf	FALSE	TRUE	FALSE
cg18862005	chr2	177940863	177940864	HNRNPA3	220988	-136557	Non-CGI	FALSE	FALSE	TRUE
cg18311633	chr2	155309539	155309540	KCNJ3	3760	-245552	Non-CGI	FALSE	TRUE	FALSE
cg12623930	chr3	52008802	52008803	ABHD14A-ACY1	100526760	-238	CGI	TRUE	TRUE	FALSE
cg06708720	chr12	1099075	1099076	RAD52	5893	142	CGI-N-Shore	TRUE	FALSE	FALSE
cg04021562	chr6	31845527	31845528	SLC44A4	80736	1294	CGI-N-Shore	TRUE	TRUE	FALSE
cg22112841	chr6	31740938	31740939	VWA7	80737	4168	CGI-N-Shelf	FALSE	TRUE	FALSE
cg15037004	chr5	71803938	71803939	ZNF366	167465	-688	Non-CGI	TRUE	FALSE	FALSE
cg05242244	chr12	53553086	53553087	ZNF740	283337	-21447	Non-CGI	FALSE	TRUE	FALSE
cg02336827	chr3	45636190	45636191	LIMD1	8994	-131	CGI-S-Shore	TRUE	FALSE	FALSE
cg04064963	chr6	158243386	158243387	SNX9	51429	-906	CGI-N-Shore	TRUE	FALSE	FALSE
cg04006143	chr4	140217312	140217313	NAA15	80155	-5362	CGI-S-Shore	FALSE	TRUE	FALSE
cg18480675	chr3	28281945	28281946	CMC1	152100	-1177	CGI-N-Shore	TRUE	FALSE	FALSE
cg04275362	chr1	167598560	167598561	RCSD1	92241	-912	CGI-N-Shore	TRUE	FALSE	FALSE
cg15948836	chr11	36114126	36114127	MIR3973	100616311	82477	Non-CGI	FALSE	TRUE	FALSE
cg02361903	chr1	110452616	110452617	CSF1	1435	-615	CGI-N-Shore	TRUE	FALSE	FALSE
cg23950157	chr17	48275919	48275920	COL1A1	1277	3079	CGI-N-Shore	FALSE	TRUE	FALSE
cg14359680	chr14	105532208	105532209	GPR132	29933	-453	Non-CGI	TRUE	FALSE	FALSE
cg12580096	chr19	14017658	14017659	CC2D1A	54862	701	CGI-S-Shore	TRUE	TRUE	FALSE
cg24217948	chr18	42261980	42261981	SETBP1	26040	1841	CGI-S-Shore	FALSE	TRUE	FALSE
cg00448560	chr16	49525727	49525728	C16orf78	123970	117918	CGI	FALSE	TRUE	FALSE
cg13959344	chr6	32901642	32901643	HLA-DMB	3109	7203	Non-CGI	FALSE	FALSE	TRUE
cg14583999	chr3	10019040	10019041	EMC3	55831	9480	Non-CGI	FALSE	TRUE	FALSE
cg15989810	chr12	131617481	131617482	LOC116437	116437	-32073	CGI-S-Shelf	FALSE	TRUE	FALSE
cg14775286	chr3	137833494	137833495	DZIP1L	199221	955	CGI-N-Shore	TRUE	TRUE	FALSE
cg12079303	chr1	61547163	61547164	NFIA	4774	4216	CGI-N-Shore	TRUE	TRUE	FALSE
cg06197616	chr2	128348899	128348900	GPR17	2840	-54538	CGI-N-Shore	FALSE	TRUE	FALSE
ch.13.39564907R	chr13	40666907	40666909	LINC00548	400123	127729	Non-CGI	FALSE	FALSE	TRUE
cg04204669	chr11	2193742	2193743	MIR4686	100616126	-549	CGI-S-Shelf	TRUE	FALSE	FALSE
cg06419432	chr17	25707535	25707536	TBC1D3P5	440419	-37179	CGI	FALSE	FALSE	TRUE
cg08713098	chr7	100005500	100005501	ZCWPW1	55063	20800	Non-CGI	FALSE	TRUE	FALSE
cg02153528	chr12	56618648	56618649	NABP2	79035	522	CGI-S-Shore	TRUE	TRUE	FALSE
cg03126058	chr1	3282757	3282758	ARHGEF16	27237	-88388	CGI	FALSE	TRUE	FALSE
cg15112910	chr1	208171413	208171414	CD34	947	-86729	Non-CGI	FALSE	FALSE	TRUE
cg12033216	chr14	59130157	59130158	DACT1	51339	29370	Non-CGI	FALSE	FALSE	TRUE
cg22026450	chr1	145476687	145476688	LIX1L	128077	-396	CGI-N-Shore	TRUE	FALSE	FALSE
cg08784091	chr6	31670005	31670006	MIR4646	100616230	-1136	CGI-N-Shore	TRUE	TRUE	FALSE
cg09124496	chr7	41735851	41735852	INHBA-AS1	285954	2336	CGI-N-Shelf	FALSE	TRUE	FALSE
cg03224418	chr20	62611858	62611859	SAMD10	140700	-495	CGI-S-Shore	TRUE	FALSE	FALSE
cg24350475	chr10	30316933	30316934	KIAA1462	57608	87485	CGI	FALSE	TRUE	FALSE
cg16290275	chr1	208042910	208042911	CD34	947	41771	CGI-S-Shore	TRUE	FALSE	FALSE
cg15903032	chr10	101297605	101297606	NKX2-3	159296	4914	CGI	FALSE	FALSE	TRUE
cg11194994	chr1	160175974	160175975	PEA15	8682	848	CGI-S-Shore	FALSE	TRUE	FALSE
cg01447660	chr2	69152678	69152679	GKN2	200504	27422	Non-CGI	FALSE	FALSE	TRUE
cg00039326	chr1	36615845	36615846	TRAPPC3	27095	-777	CGI-S-Shore	TRUE	FALSE	FALSE
cg05379350	chr17	27917157	27917158	ANKRD13B	124930	355	CGI	TRUE	TRUE	FALSE
cg18786171	chr10	75935758	75935759	ADK	132	24814	CGI-N-Shore	TRUE	TRUE	FALSE
cg03996822	chr4	74486558	74486559	RASSF6	166824	-217	Non-CGI	TRUE	FALSE	FALSE
cg04953061	chr14	53620393	53620394	DDHD1	80821	-346	CGI-S-Shore	TRUE	FALSE	FALSE
cg13393785	chr19	8317932	8317933	CERS4	79603	43714	Non-CGI	FALSE	TRUE	FALSE
cg26316599	chr5	172456055	172456056	SNORA74B	677841	8325	Non-CGI	FALSE	TRUE	FALSE
cg15893346	chr7	65447565	65447566	GUSB	2990	-263	CGI-S-Shore	TRUE	FALSE	FALSE
cg26543112	chr6	133188277	133188278	SNORA33	594839	51830	Non-CGI	FALSE	FALSE	TRUE
cg01955153	chr16	50769852	50769853	CYLD	1540	-6107	Non-CGI	FALSE	FALSE	TRUE
cg20746795	chr1	15478206	15478207	TMEM51-AS1	200197	752	CGI-N-Shore	TRUE	TRUE	FALSE
cg05042708	chr10	105212813	105212814	CALHM2	51063	-154	CGI-S-Shore	TRUE	FALSE	FALSE
cg02030542	chr16	70722454	70722455	MTSS1L	92154	-2499	CGI-S-Shelf	TRUE	TRUE	FALSE
cg03289906	chr7	94538408	94538409	PPP1R9A	55607	1458	CGI-S-Shore	TRUE	TRUE	FALSE
cg26350754	chr6	33043868	33043869	HLA-DPB1	3115	164	Non-CGI	TRUE	TRUE	FALSE
cg13106156	chr6	33140934	33140935	COL11A2	1302	19309	Non-CGI	FALSE	TRUE	FALSE
cg18395623	chr7	29986771	29986772	SCRN1	9805	43132	Non-CGI	FALSE	TRUE	FALSE
cg02046143	chr11	133797911	133797912	LOC283174	283174	-26275	CGI-N-Shelf	FALSE	TRUE	FALSE
cg20813374	chr6	35657180	35657181	FKBP5	2289	39215	CGI-S-Shore	TRUE	TRUE	FALSE
cg26483332	chr10	76993756	76993757	COMTD1	118881	2012	CGI-N-Shore	FALSE	TRUE	FALSE
cg01606885	chr5	53765871	53765872	HSPB3	8988	14439	Non-CGI	FALSE	FALSE	TRUE
cg13221458	chr6	160112632	160112633	SOD2	6648	1719	CGI-N-Shore	FALSE	TRUE	FALSE
cg03520471	chr3	97753623	97753624	GABRR3	200959	523	Non-CGI	FALSE	TRUE	FALSE
cg05156137	chr21	35898975	35898976	KCNE1	3753	-14401	CGI-S-Shore	TRUE	TRUE	FALSE
cg05469614	chr16	3142818	3142819	ZSCAN10	84891	6473	CGI-S-Shelf	TRUE	TRUE	FALSE
cg20669012	chr3	11102341	11102342	SLC6A1	6529	67920	CGI-N-Shore	FALSE	FALSE	TRUE
cg00725138	chr22	19716556	19716557	SEPT5-GP1BB	100526833	14568	CGI-S-Shore	FALSE	FALSE	TRUE
cg11612647	chr10	130757757	130757758	MGMT	4255	-507695	CGI	FALSE	FALSE	TRUE
cg26122963	chr7	100198944	100198945	PCOLCE	5118	-936	CGI-N-Shelf	TRUE	TRUE	FALSE
cg04172497	chr11	59382296	59382297	OSBP	5007	1319	CGI-N-Shore	FALSE	TRUE	FALSE
cg06492796	chr12	96883057	96883058	CDK17	5128	-88690	CGI-N-Shore	TRUE	FALSE	FALSE
cg02729030	chr7	110879415	110879416	LRRN3	54674	148352	Non-CGI	FALSE	TRUE	FALSE
cg02301528	chr12	12939519	12939520	MIR613	693198	21935	CGI-N-Shore	FALSE	TRUE	FALSE
cg12252865	chr3	13520771	13520772	HDAC11	79885	-451	CGI-N-Shore	TRUE	FALSE	FALSE
cg14069287	chr4	169631613	169631614	PALLD	23022	213395	Non-CGI	FALSE	TRUE	FALSE
cg24159636	chr6	18043467	18043468	KIF13A	63971	-55612	Non-CGI	FALSE	FALSE	TRUE
cg14532755	chr4	1762460	1762461	FGFR3	2261	-32577	CGI-N-Shore	FALSE	FALSE	TRUE
cg19878479	chr19	49015582	49015583	LMTK3	114783	862	CGI	FALSE	TRUE	FALSE
cg11622162	chr17	78237543	78237544	RNF213	57674	2875	CGI-S-Shelf	FALSE	TRUE	FALSE
cg05365199	chr1	221604887	221604888	C1orf140	400804	-95248	Non-CGI	FALSE	FALSE	TRUE
cg09585333	chr11	65340843	65340844	FAM89B	23625	1022	CGI-S-Shore	FALSE	TRUE	FALSE
cg14257429	chr9	116570319	116570320	ZNF618	114991	-68241	Non-CGI	FALSE	FALSE	TRUE
cg00573770	chr2	145278485	145278486	ZEB2-AS1	100303491	-18	CGI-S-Shore	TRUE	FALSE	FALSE
cg03508063	chr17	7124385	7124386	DLG4	1742	-1015	CGI-S-Shore	TRUE	TRUE	FALSE
cg23715749	chr1	37413867	37413868	GRIK3	2899	85975	Non-CGI	FALSE	TRUE	FALSE
cg08553327	chr6	31543647	31543648	TNF	7124	296	Non-CGI	TRUE	FALSE	FALSE
cg15734764	chr10	134266555	134266556	C10orf91	170393	7840	CGI-N-Shore	FALSE	FALSE	TRUE
cg05721773	chr1	207083336	207083337	FAIM3	9214	12040	CGI-S-Shore	FALSE	TRUE	FALSE
cg19261426	chr1	228560439	228560440	TRIM11	81559	34076	CGI-S-Shore	FALSE	TRUE	FALSE
cg13679679	chr3	28282245	28282246	CMC1	152100	-877	CGI-N-Shore	TRUE	FALSE	FALSE
cg18150280	chr1	192776859	192776860	RGS2	5997	-1308	CGI-N-Shore	TRUE	FALSE	FALSE
cg26685941	chr13	95952902	95952903	ABCC4	10257	783	CGI-N-Shore	FALSE	TRUE	FALSE
cg26921612	chr22	32150828	32150829	DEPDC5	9681	890	CGI-S-Shore	TRUE	TRUE	FALSE
cg18076651	chr12	53625605	53625606	RARG	5916	433	CGI-N-Shore	FALSE	TRUE	FALSE
cg24848615	chr19	3368396	3368397	NFIC	4782	8834	CGI-S-Shore	FALSE	TRUE	FALSE
cg00602811	chr2	145278564	145278565	ZEB2-AS1	100303491	-97	CGI-S-Shore	TRUE	FALSE	FALSE
cg07121693	chr10	44148437	44148438	ZNF32	7580	-4110	CGI-S-Shelf	FALSE	TRUE	FALSE
cg10107473	chr2	46566094	46566095	EPAS1	2034	41552	Non-CGI	FALSE	TRUE	FALSE
cg08998192	chr6	32805570	32805571	TAP2	6891	975	CGI-N-Shore	TRUE	TRUE	FALSE
cg04742397	chr14	95986554	95986555	SNHG10	283596	14653	CGI-S-Shelf	FALSE	FALSE	TRUE
cg10597359	chr17	16946995	16946996	MPRIP	23164	920	CGI-S-Shore	FALSE	TRUE	FALSE
cg22112832	chr2	71098542	71098543	VAX2	25806	-29176	CGI-N-Shore	FALSE	FALSE	TRUE
cg00103778	chr20	30196041	30196042	MIR3193	100422904	1051	CGI-N-Shore	FALSE	FALSE	TRUE
cg05541640	chr3	52008740	52008741	ABHD14A-ACY1	100526760	-300	CGI	TRUE	TRUE	FALSE
cg04651240	chr11	18229519	18229520	LOC494141	494141	-1164	CGI-N-Shore	TRUE	FALSE	FALSE
cg01491071	chr2	206789816	206789817	INO80D	54891	161088	CGI-N-Shore	FALSE	FALSE	TRUE
cg22990198	chr20	62283533	62283534	STMN3	50861	1245	CGI-S-Shore	FALSE	TRUE	FALSE
cg04872610	chr1	114448489	114448490	DCLRE1B	64858	573	CGI-S-Shore	TRUE	TRUE	FALSE
cg17101285	chr12	49725480	49725481	C1QL4	338761	5489	CGI-N-Shore	FALSE	TRUE	FALSE
cg19825437	chr3	169383292	169383293	MECOM	2122	-1728	CGI-S-Shore	TRUE	FALSE	FALSE
cg06661266	chr3	134027721	134027722	RYK	6259	-58134	CGI-N-Shelf	FALSE	FALSE	TRUE
cg18568843	chr6	52535550	52535551	TMEM14A	28978	-332	CGI-N-Shore	TRUE	FALSE	FALSE
cg10476085	chr5	142065737	142065738	FGF1	2246	11896	Non-CGI	TRUE	TRUE	FALSE
cg07703358	chr7	138702117	138702118	ZC3HAV1L	92092	18656	Non-CGI	FALSE	FALSE	TRUE
cg05093315	chr11	18127958	18127959	SAAL1	113174	-319	CGI-S-Shore	TRUE	FALSE	FALSE
cg04671742	chr12	6881997	6881998	LAG3	3902	326	CGI-N-Shore	TRUE	FALSE	FALSE
cg03577250	chr20	31261994	31261995	C20orf203	284805	-250	Non-CGI	TRUE	FALSE	FALSE
cg14973055	chr17	72306038	72306039	KIF19	124602	-16311	Non-CGI	TRUE	TRUE	FALSE
cg14209784	chr10	88729861	88729862	AGAP11	119385	-635	CGI-S-Shore	TRUE	TRUE	FALSE
cg25533247	chr19	15530630	15530631	AKAP8L	26993	-796	CGI-S-Shore	TRUE	FALSE	FALSE
cg07568430	chr1	110452482	110452483	CSF1	1435	-749	CGI-N-Shore	TRUE	FALSE	FALSE
cg18406708	chr2	38209694	38209695	RMDN2	151393	57231	Non-CGI	FALSE	TRUE	FALSE
cg25694915	chr2	169658981	169658982	NOSTRIN	115677	15931	Non-CGI	TRUE	TRUE	FALSE
cg27376872	chr8	899171	899172	ERICH1	157697	-217944	CGI	FALSE	TRUE	FALSE
cg07127410	chr22	29427851	29427852	C22orf31	25770	30054	CGI-S-Shore	FALSE	TRUE	FALSE
cg10221746	chr1	156629412	156629413	BCAN	63827	17671	CGI-S-Shore	FALSE	FALSE	TRUE
cg16618104	chr12	104853100	104853101	CHST11	50515	2407	CGI-S-Shore	FALSE	TRUE	FALSE
cg14314729	chr5	179815975	179815976	GFPT2	9945	-35659	CGI-N-Shore	FALSE	FALSE	TRUE
cg18738190	chr10	73740291	73740292	CHST3	9469	16170	Non-CGI	FALSE	TRUE	FALSE
cg13807549	chr9	116444721	116444722	ZNF618	114991	-193839	Non-CGI	FALSE	FALSE	TRUE
cg02286081	chr6	33043841	33043842	HLA-DPB1	3115	137	Non-CGI	TRUE	TRUE	FALSE
cg11419186	chr16	81477373	81477374	CMIP	80790	-1400	CGI-N-Shore	TRUE	FALSE	FALSE
cg23960707	chr17	56083289	56083290	SRSF1	6426	1416	CGI-N-Shore	FALSE	TRUE	FALSE
cg12298445	chr11	72438603	72438604	PDE2A	5138	-53105	CGI-S-Shore	FALSE	TRUE	FALSE
cg01477133	chr20	33878142	33878143	FAM83C	128876	2081	CGI-N-Shore	FALSE	TRUE	FALSE
cg16454902	chr16	27414272	27414273	IL21R	50615	788	Non-CGI	FALSE	TRUE	FALSE
cg27438128	chr10	43951555	43951556	ZNF487P	642819	18980	CGI	FALSE	TRUE	FALSE
cg10123654	chr16	4162541	4162542	ADCY9	115	3643	CGI-N-Shore	FALSE	TRUE	FALSE
cg15736994	chr4	156775941	156775942	ASIC5	51802	11482	Non-CGI	FALSE	TRUE	FALSE
cg19848940	chr12	112250795	112250796	MAPKAPK5	8550	-29482	Non-CGI	FALSE	FALSE	TRUE
cg14175438	chr7	121036729	121036730	FAM3C	10447	-306	CGI-S-Shore	TRUE	FALSE	FALSE
cg25467652	chr1	11795976	11795977	AGTRAP	57085	-164	CGI-N-Shore	TRUE	FALSE	FALSE
cg03752138	chr17	76357232	76357233	SOCS3	9021	-1073	CGI-S-Shore	TRUE	FALSE	FALSE
cg21280392	chr17	47304116	47304117	PHOSPHO1	162466	4010	CGI-S-Shore	TRUE	TRUE	FALSE
cg02991727	chr1	47646024	47646025	PDZK1IP1	10158	9745	Non-CGI	FALSE	FALSE	TRUE
cg15894389	chr13	47470857	47470858	HTR2A	3356	310	CGI-S-Shelf	TRUE	FALSE	FALSE
cg02713951	chr22	46516291	46516292	MIRLET7B	406884	6724	CGI-S-Shelf	FALSE	FALSE	TRUE
cg14039301	chr11	296540	296541	IFITM5	387733	2984	CGI	FALSE	FALSE	TRUE
cg02315732	chr11	61732658	61732659	FTH1	2495	2472	CGI-N-Shore	FALSE	TRUE	FALSE
cg12577320	chr3	50304179	50304180	SEMA3B	7869	-859	Non-CGI	TRUE	FALSE	FALSE
cg10577534	chr15	67354460	67354461	SMAD3	4088	-3733	CGI-N-Shore	FALSE	FALSE	TRUE
cg04299080	chr1	38274753	38274754	YRDC	79693	-887	CGI-S-Shore	TRUE	TRUE	FALSE
cg04600297	chr19	42750575	42750576	GSK3A	2931	-3838	CGI-S-Shore	FALSE	FALSE	TRUE
cg00251125	chr1	228395450	228395451	OBSCN	84033	-409	Non-CGI	TRUE	TRUE	FALSE
cg01552919	chr4	901847	901848	GAK	2580	24325	CGI	FALSE	TRUE	FALSE
cg08644498	chr1	46502608	46502609	TSPAN1	10103	-138139	Non-CGI	FALSE	FALSE	TRUE
cg14507845	chr9	137418069	137418070	COL5A1	1289	-115581	CGI-S-Shore	FALSE	FALSE	TRUE
cg04976151	chr16	57496328	57496329	POLR2C	5432	-221	CGI-N-Shore	TRUE	FALSE	FALSE
cg16581455	chr8	94857684	94857685	MIR378D2	100616169	70661	Non-CGI	FALSE	FALSE	TRUE
cg02097429	chr16	27210995	27210996	KDM8	79831	-3810	CGI-N-Shelf	FALSE	FALSE	TRUE
cg15829826	chr11	65153860	65153861	FRMD8	83786	-179	CGI	TRUE	FALSE	FALSE
cg24952158	chr18	34338496	34338497	KIAA1328	57536	-70582	CGI-N-Shelf	FALSE	TRUE	FALSE
cg05915866	chr16	73090838	73090839	ZFHX3	463	1694	CGI-N-Shore	FALSE	TRUE	FALSE
cg23124451	chr22	39548131	39548132	CBX7	23492	405	CGI	FALSE	TRUE	FALSE
cg06163904	chr17	78964779	78964780	CHMP6	79643	-860	CGI-S-Shore	TRUE	FALSE	FALSE
cg05061804	chr9	135282417	135282418	TTF1	7270	-178	CGI-S-Shore	TRUE	FALSE	FALSE
cg26530942	chr2	232110727	232110728	ARMC9	80210	47384	Non-CGI	FALSE	TRUE	FALSE
cg15102821	chr1	1844801	1844802	CALML6	163688	-1463	CGI-S-Shelf	TRUE	FALSE	FALSE
cg07397616	chr22	38035109	38035110	SH3BP1	23616	4447	CGI-N-Shore	TRUE	TRUE	FALSE
cg16960758	chr2	169658992	169658993	NOSTRIN	115677	15942	Non-CGI	TRUE	TRUE	FALSE
cg16371538	chr1	37940813	37940814	ZC3H12A	80149	693	CGI	TRUE	TRUE	FALSE
cg09692396	chr12	7023346	7023347	ENO2	2026	-266	CGI	TRUE	TRUE	FALSE
cg27560292	chr11	6632884	6632885	TAF10	6881	589	CGI-N-Shore	FALSE	TRUE	FALSE
cg20303331	chr17	36945575	36945576	PIP4K2B	8396	10581	Non-CGI	FALSE	TRUE	FALSE
cg15844711	chr11	59435407	59435408	PATL1	219988	1102	CGI-N-Shore	FALSE	TRUE	FALSE
cg26847866	chr8	27492077	27492078	SCARA3	51435	499	CGI-S-Shore	FALSE	TRUE	FALSE
cg07211259	chr9	5510497	5510498	PDCD1LG2	80380	-46	Non-CGI	TRUE	TRUE	FALSE
cg04766061	chr17	30810854	30810855	CDK5R1	8851	-3249	CGI-N-Shelf	FALSE	FALSE	TRUE
cg07368443	chr1	45265337	45265338	PLK3	1263	-697	CGI-N-Shore	TRUE	FALSE	FALSE
cg12163871	chr19	47207843	47207844	MIR320E	100422913	4757	CGI-S-Shore	FALSE	TRUE	FALSE
cg05086282	chr14	102228853	102228854	PPP2R5C	5527	717	CGI-S-Shore	FALSE	TRUE	FALSE
cg27386529	chr3	47517807	47517808	SCAP	22937	-361	CGI-S-Shore	TRUE	FALSE	FALSE
cg02334775	chr15	89182676	89182677	ISG20	3669	3771	Non-CGI	FALSE	TRUE	FALSE
cg14646983	chr9	34602974	34602975	RPP25L	138716	9134	Non-CGI	FALSE	FALSE	TRUE
cg21990700	chr12	7260776	7260777	C1RL-AS1	283314	-126	Non-CGI	TRUE	TRUE	FALSE
cg14414100	chr9	19547530	19547531	ACER2	340485	149722	Non-CGI	FALSE	TRUE	FALSE
cg14305711	chr2	62132430	62132431	COMMD1	150684	-371	CGI-N-Shore	TRUE	FALSE	FALSE
cg23912266	chr6	33139581	33139582	COL11A2	1302	20662	Non-CGI	FALSE	TRUE	FALSE
cg05934592	chr14	54642178	54642179	BMP4	652	-218623	Non-CGI	FALSE	FALSE	TRUE
cg26580095	chr1	92545650	92545651	BTBD8	284697	-210	CGI-N-Shore	TRUE	FALSE	FALSE
cg07388493	chr1	39491459	39491460	NDUFS5	4725	-506	CGI-N-Shore	TRUE	FALSE	FALSE
cg26725076	chr12	132569963	132569964	EP400NL	347918	1134	CGI-S-Shore	FALSE	TRUE	FALSE
cg01054110	chr12	125002332	125002333	NCOR2	9612	49676	CGI	FALSE	TRUE	FALSE
cg12711760	chr11	20132923	20132924	DBX1	120237	48945	Non-CGI	FALSE	TRUE	FALSE
cg05316627	chr6	87861261	87861262	ZNF292	23036	-1288	CGI-N-Shore	TRUE	FALSE	FALSE
cg18333339	chr3	112885856	112885857	BOC	91653	-44554	Non-CGI	FALSE	FALSE	TRUE
cg05898524	chr1	156083276	156083277	LMNA	4000	30906	CGI-N-Shore	TRUE	TRUE	FALSE
cg04308040	chr13	44942303	44942304	SERP2	387923	-5673	Non-CGI	FALSE	FALSE	TRUE
cg22273555	chr6	33130034	33130035	COL11A2	1302	30209	CGI-S-Shore	FALSE	FALSE	TRUE
cg08468082	chr1	15334845	15334846	TMEM51-AS1	200197	144113	Non-CGI	FALSE	TRUE	FALSE
cg23325364	chr10	568840	568841	PRR26	414235	-127046	CGI	FALSE	TRUE	FALSE
cg03638795	chr11	416499	416500	SIGIRR	59307	896	CGI	TRUE	TRUE	FALSE
cg05324516	chr10	29421357	29421358	LYZL1	84569	-156631	Non-CGI	FALSE	FALSE	TRUE
cg08913523	chr8	126649807	126649808	TRIB1	10221	207243	Non-CGI	FALSE	FALSE	TRUE
cg02316713	chr21	43619559	43619560	ABCG1	9619	-238	Non-CGI	TRUE	FALSE	FALSE
cg04424621	chr6	27101941	27101942	HIST1H2AG	8969	1123	CGI-S-Shore	TRUE	FALSE	FALSE
cg01279413	chr20	62030494	62030495	CHRNA4	1137	-21004	CGI-S-Shore	FALSE	FALSE	TRUE
cg26246342	chr6	32945423	32945424	BRD2	6046	8985	Non-CGI	FALSE	TRUE	FALSE
cg14989226	chr7	75897850	75897851	HSPB1	3315	-34023	CGI-S-Shore	FALSE	TRUE	FALSE
cg26763486	chr10	124013672	124013673	BTBD16	118663	-17147	Non-CGI	FALSE	TRUE	FALSE
cg12258344	chr2	47550528	47550529	EPCAM	4072	-45757	Non-CGI	FALSE	TRUE	FALSE
cg18797590	chr4	15480643	15480644	CC2D2A	57545	9153	Non-CGI	TRUE	TRUE	FALSE
cg22971594	chr14	23442770	23442771	AJUBA	84962	9076	Non-CGI	FALSE	TRUE	FALSE
cg06170683	chr16	3740774	3740775	TRAP1	10131	26822	CGI	FALSE	TRUE	FALSE
cg00417323	chr18	29307959	29307960	SLC25A52	147407	32882	CGI-S-Shelf	FALSE	FALSE	TRUE
cg09608765	chr3	45636137	45636138	LIMD1	8994	-184	CGI-S-Shore	TRUE	FALSE	FALSE
cg01797043	chr16	2004686	2004687	RPL3L	6123	-6	CGI-S-Shore	TRUE	TRUE	FALSE
cg00921350	chr16	50701499	50701500	SNX20	124460	13763	CGI-S-Shelf	TRUE	TRUE	FALSE
cg01542719	chr3	154042778	154042779	DHX36	170506	-491	CGI-S-Shore	TRUE	FALSE	FALSE
cg22586221	chr15	78984179	78984180	CHRNB4	1143	-31304	Non-CGI	FALSE	FALSE	TRUE
cg20012601	chr4	141013584	141013585	MAML3	55534	61647	CGI	FALSE	TRUE	FALSE
cg17621438	chr5	63461216	63461217	RNF180	285671	-453	CGI-N-Shore	TRUE	FALSE	FALSE
cg03443986	chr2	65100572	65100573	LOC400958	400958	59007	CGI	FALSE	FALSE	TRUE
cg01719405	chr14	62401258	62401259	SYT16	83851	-52543	Non-CGI	FALSE	FALSE	TRUE
cg02228185	chr17	3379567	3379568	ASPA	443	2162	CGI-S-Shelf	TRUE	TRUE	FALSE
cg22805381	chr14	51760188	51760189	LINC00640	283553	-39921	Non-CGI	FALSE	FALSE	TRUE
cg08223837	chr17	80232440	80232441	CSNK1D	1453	-845	CGI-S-Shore	TRUE	FALSE	FALSE
cg04444949	chr1	11795746	11795747	AGTRAP	57085	-394	CGI-N-Shore	TRUE	FALSE	FALSE
cg26682900	chr12	123344689	123344690	HIP1R	9026	25393	CGI-S-Shelf	FALSE	TRUE	FALSE
cg04689379	chr19	46171262	46171263	GIPR	2696	-238	CGI-N-Shore	TRUE	FALSE	FALSE
cg01739327	chr11	85955219	85955220	EED	8726	-585	CGI-N-Shore	TRUE	FALSE	FALSE
cg01101873	chr1	3269478	3269479	ARHGEF16	27237	-101667	CGI	FALSE	TRUE	FALSE
cg20543183	chr6	31648146	31648147	LY6G5C	80741	3669	CGI-N-Shore	TRUE	TRUE	FALSE
cg24906410	chr19	44249756	44249757	SMG9	56006	9384	Non-CGI	FALSE	TRUE	FALSE
cg23436584	chr12	98833359	98833360	SLC9A7P1	121456	17562	Non-CGI	FALSE	FALSE	TRUE
cg00387658	chr20	54986793	54986794	CASS4	57091	-373	Non-CGI	TRUE	FALSE	FALSE
cg06131936	chr11	3187271	3187272	OSBPL5	114879	696	CGI-S-Shore	TRUE	TRUE	FALSE
cg03915012	chr4	902074	902075	GAK	2580	24098	CGI-S-Shore	FALSE	TRUE	FALSE
cg16640358	chr2	239892057	239892058	FLJ43879	401039	-44091	CGI-S-Shelf	FALSE	FALSE	TRUE
cg05442902	chr22	21369010	21369011	P2RX6	9127	-430	CGI-S-Shore	TRUE	FALSE	FALSE
cg11064966	chr5	32506514	32506515	ZFR	51663	-61669	Non-CGI	FALSE	FALSE	TRUE
cg12317815	chr17	3379283	3379284	ASPA	443	1878	CGI-S-Shelf	TRUE	TRUE	FALSE
cg11891925	chr10	13091949	13091950	CCDC3	83643	49762	Non-CGI	TRUE	TRUE	FALSE
cg03758021	chr20	62208140	62208141	HELZ2	85441	-2547	CGI-N-Shore	FALSE	FALSE	TRUE
cg06544310	chr19	41768003	41768004	HNRNPUL1	11100	-386	CGI-N-Shore	TRUE	FALSE	FALSE
cg23698023	chr8	27181813	27181814	PTK2B	2185	12813	CGI-N-Shore	TRUE	TRUE	FALSE
cg26610808	chr10	102046685	102046686	BLOC1S2	282991	-245	CGI-S-Shore	TRUE	FALSE	FALSE
cg19804488	chr17	73760363	73760364	GALK1	2584	915	CGI-N-Shore	FALSE	TRUE	FALSE
cg15711521	chr3	167767619	167767620	GOLIM4	27333	45796	Non-CGI	FALSE	TRUE	FALSE
cg04738109	chr4	150931494	150931495	DCLK2	166614	-67930	Non-CGI	FALSE	FALSE	TRUE
cg26403171	chr5	148507714	148507715	ABLIM3	22885	-13338	Non-CGI	FALSE	FALSE	TRUE
cg12554573	chr3	51976667	51976668	PARP3	10039	305	CGI-S-Shore	TRUE	FALSE	FALSE
cg27068143	chr13	47471264	47471265	HTR2A	3356	-94	CGI-S-Shelf	TRUE	FALSE	FALSE
cg07092212	chr11	46382544	46382545	MIR4688	100616368	-15406	Non-CGI	TRUE	TRUE	FALSE
cg05261851	chr16	68001206	68001207	SLC12A4	6560	1887	CGI-N-Shore	TRUE	TRUE	FALSE
cg02395812	chr14	105955879	105955880	C14orf80	283643	-311	CGI-S-Shore	TRUE	FALSE	FALSE
cg03485669	chr8	13016635	13016636	KIAA1456	57604	213483	Non-CGI	FALSE	TRUE	FALSE
cg17832704	chr17	7516888	7516889	SHBG	6462	-492	CGI-N-Shore	TRUE	TRUE	FALSE
cg09642020	chr9	139379173	139379174	SEC16A	9919	-961	CGI	TRUE	FALSE	FALSE
cg01983373	chr14	101196130	101196131	DLK1	8788	2927	CGI-S-Shore	FALSE	TRUE	FALSE
cg06247837	chr17	37820135	37820136	TCAP	8557	-1462	CGI-N-Shelf	TRUE	TRUE	FALSE
cg22402467	chr12	7168056	7168057	LPCAT3	10162	-42213	Non-CGI	TRUE	TRUE	FALSE
cg17139392	chr12	66430294	66430295	TMBIM4	51643	133511	Non-CGI	FALSE	FALSE	TRUE
cg13929658	chr12	6304728	6304729	CD9	928	-4752	CGI-N-Shelf	FALSE	FALSE	TRUE
cg03853945	chr13	84024017	84024018	SLITRK1	114798	432509	Non-CGI	FALSE	FALSE	TRUE
cg03901431	chr16	85517684	85517685	GSE1	23199	-127343	CGI	FALSE	FALSE	TRUE
cg07797372	chr1	64602654	64602655	UBE2U	148581	-66834	Non-CGI	FALSE	TRUE	FALSE
cg09310092	chr19	35529201	35529202	HPN	3249	-2207	CGI-N-Shore	FALSE	TRUE	FALSE
cg17401106	chr20	3650493	3650494	GFRA4	64096	-6446	CGI-N-Shelf	TRUE	TRUE	FALSE
cg26424147	chr2	43055984	43055985	HAAO	23498	-36232	CGI-S-Shore	FALSE	FALSE	TRUE
cg05106770	chr4	128545193	128545194	INTU	27152	-8892	CGI-S-Shore	FALSE	FALSE	TRUE
cg14898223	chr2	190447407	190447408	SLC40A1	30061	1075	CGI-S-Shore	TRUE	TRUE	FALSE
cg14755852	chr8	23386014	23386015	SLC25A37	51312	-347	CGI-N-Shore	TRUE	FALSE	FALSE
cg14244577	chr16	70332878	70332879	DDX19A	55308	-192	CGI-N-Shore	TRUE	TRUE	FALSE
cg13586457	chr15	42186830	42186831	SPTBN5	51332	-554	Non-CGI	TRUE	FALSE	FALSE
cg19235307	chr3	129160154	129160155	IFT122	55764	1185	CGI-S-Shore	TRUE	TRUE	FALSE
cg09791504	chr1	151701849	151701850	CELF3	11189	-12558	Non-CGI	FALSE	TRUE	FALSE
cg13804478	chr1	155158319	155158320	MUC1	4582	4385	CGI-N-Shelf	FALSE	TRUE	FALSE
cg01928418	chr22	41810665	41810666	TOB2	10766	32360	CGI-S-Shore	FALSE	FALSE	TRUE
cg12899747	chr3	25391527	25391528	RARB	5915	175703	Non-CGI	FALSE	TRUE	FALSE
cg26276120	chr12	6977747	6977748	TPI1	7167	1162	CGI-S-Shore	FALSE	TRUE	FALSE
cg16385335	chr11	71710614	71710615	IL18BP	10068	655	Non-CGI	TRUE	TRUE	FALSE
cg03453309	chr6	41708582	41708583	TFEB	7942	-4584	Non-CGI	FALSE	TRUE	FALSE
cg05085585	chr16	30420623	30420624	ZNF771	51333	1887	CGI-S-Shore	FALSE	TRUE	FALSE
cg24712501	chr5	1401718	1401719	SLC6A3	6531	43823	CGI-N-Shelf	FALSE	TRUE	FALSE
cg11930955	chr12	113660045	113660046	TPCN1	53373	784	CGI-S-Shore	TRUE	TRUE	FALSE
cg18505959	chr6	31670195	31670196	MIR4646	100616230	-1326	CGI-N-Shore	TRUE	TRUE	FALSE
cg24892069	chr10	33562205	33562206	NRP1	8829	61799	Non-CGI	FALSE	TRUE	FALSE
cg26489497	chr16	28512017	28512018	APOBR	55911	6046	CGI-S-Shelf	FALSE	TRUE	FALSE
cg19328649	chr17	63053432	63053433	GNA13	10672	-511	CGI-S-Shore	TRUE	FALSE	FALSE
cg13612317	chr10	32345864	32345865	KIF5B	3799	-492	CGI-S-Shore	TRUE	FALSE	FALSE
cg25616535	chr17	47294967	47294968	GNGT2	2793	-7030	CGI-N-Shelf	FALSE	TRUE	FALSE
cg14819891	chr5	168370991	168370992	MIR218-2	407001	-175730	Non-CGI	FALSE	TRUE	FALSE
cg14689532	chr11	820572	820573	PNPLA2	57104	1670	CGI-S-Shore	FALSE	TRUE	FALSE
cg13675837	chr17	54910204	54910205	C17orf67	339210	1050	CGI-N-Shore	TRUE	TRUE	FALSE
cg24024661	chr19	1074425	1074426	HMHA1	23526	8494	CGI-S-Shore	FALSE	TRUE	FALSE
cg16015593	chr14	51794932	51794933	LINC00640	283553	-5177	Non-CGI	FALSE	FALSE	TRUE
cg20359888	chr15	85362883	85362884	ALPK3	57538	2971	CGI-S-Shelf	FALSE	TRUE	FALSE
cg00040575	chr22	18506180	18506181	MICAL3	57553	1143	CGI-N-Shore	FALSE	TRUE	FALSE
cg04439252	chr17	40475282	40475283	STAT5A	6776	35716	Non-CGI	FALSE	TRUE	FALSE
cg03211864	chr10	124060833	124060834	BTBD16	118663	30011	Non-CGI	FALSE	TRUE	FALSE
cg03654783	chr1	156634034	156634035	NES	10763	13153	CGI-S-Shelf	FALSE	FALSE	TRUE
cg07521929	chr5	139742283	139742284	SLC4A9	83697	2495	CGI-N-Shore	FALSE	TRUE	FALSE
cg01671681	chr3	155421735	155421736	PLCH1	23007	260	Non-CGI	FALSE	TRUE	FALSE
cg19590421	chr14	51327604	51327605	ABHD12B	145447	-11272	Non-CGI	FALSE	FALSE	TRUE
cg08888956	chr12	86267839	86267840	NTS	4922	-232	Non-CGI	TRUE	FALSE	FALSE
cg12350474	chr17	46578476	46578477	HOXB1	3211	29794	Non-CGI	FALSE	FALSE	TRUE
cg06007201	chr16	88850218	88850219	PIEZO1	9780	1152	CGI-N-Shore	FALSE	TRUE	FALSE
cg13856810	chr1	861886	861887	SAMD11	148398	1355	CGI-S-Shore	FALSE	TRUE	FALSE
cg04431935	chr16	1413516	1413517	GNPTG	84572	11615	CGI	FALSE	TRUE	FALSE
cg00583733	chr16	30075102	30075103	ALDOA	226	10690	CGI-N-Shore	TRUE	TRUE	FALSE
cg25143508	chr1	203449947	203449948	PRELP	5549	5063	Non-CGI	FALSE	TRUE	FALSE
cg13119578	chr11	65196696	65196697	NEAT1	283131	6426	Non-CGI	TRUE	FALSE	FALSE
cg24868150	chr2	20861653	20861654	GDF7	151449	-4769	CGI-N-Shelf	FALSE	FALSE	TRUE
cg06769994	chr17	48288538	48288539	COL1A1	1277	-9537	Non-CGI	FALSE	FALSE	TRUE
cg17593472	chr5	142065676	142065677	FGF1	2246	11957	Non-CGI	TRUE	TRUE	FALSE
cg17529152	chr2	120125452	120125453	DBI	1622	947	CGI-S-Shore	TRUE	TRUE	FALSE
cg01314044	chr11	94246036	94246037	LOC643037	643037	340	CGI-S-Shore	FALSE	TRUE	FALSE
cg04334016	chr6	154769781	154769782	CNKSR3	154043	61970	Non-CGI	FALSE	TRUE	FALSE
cg15676719	chr1	167598521	167598522	RCSD1	92241	-951	CGI-N-Shore	TRUE	FALSE	FALSE
cg01957582	chr22	32341780	32341781	C22orf24	25775	-443	CGI-S-Shore	TRUE	TRUE	FALSE
cg04161365	chr17	27230393	27230394	DHRS13	147015	-303	CGI-S-Shore	TRUE	FALSE	FALSE
cg01713950	chr1	17766995	17766996	RCC2	55920	-744	CGI-S-Shore	TRUE	FALSE	FALSE
cg14428590	chr15	40076065	40076066	FSIP1	161835	-1025	CGI-S-Shore	TRUE	FALSE	FALSE
cg05339415	chr14	105107459	105107460	TMEM179	388021	-36361	CGI-S-Shelf	FALSE	FALSE	TRUE
cg19381766	chr7	5597647	5597648	ACTB	60	-27414	CGI-S-Shore	FALSE	FALSE	TRUE
cg20107346	chr12	88803163	88803164	KITLG	4254	171085	Non-CGI	FALSE	FALSE	TRUE
cg10493324	chr11	118974627	118974628	DPAGT1	1798	-1774	CGI-S-Shore	TRUE	FALSE	FALSE
cg10043090	chr11	1536810	1536811	DUSP8	1850	56338	CGI	FALSE	TRUE	FALSE
cg03367679	chr17	38183553	38183554	SNORD124	100113390	-240	CGI-S-Shore	TRUE	TRUE	FALSE
cg10977734	chr6	30582416	30582417	PPP1R10	5514	2602	CGI-N-Shelf	FALSE	TRUE	FALSE
cg00553487	chr19	42570406	42570407	GRIK5	2901	-448	Non-CGI	TRUE	FALSE	FALSE
cg07158339	chr9	71650237	71650238	FXN	2395	-240	CGI-N-Shore	TRUE	FALSE	FALSE
cg16368147	chr4	62111221	62111222	LPHN3	23284	44246	Non-CGI	FALSE	TRUE	FALSE
cg06462220	chr6	30646756	30646757	DHX16	8449	-5925	CGI-N-Shore	FALSE	TRUE	FALSE
cg07850154	chr5	63461232	63461233	RNF180	285671	-437	CGI-N-Shore	TRUE	FALSE	FALSE
cg27021512	chr13	47371635	47371636	ESD	2098	-267	CGI-S-Shore	TRUE	FALSE	FALSE
cg11142333	chr1	173840261	173840262	ZBTB37	84614	3040	CGI-S-Shelf	FALSE	TRUE	FALSE
cg00232105	chr14	100752338	100752339	SLC25A29	123096	20520	CGI-S-Shore	FALSE	FALSE	TRUE
cg06934523	chr14	70077930	70077931	KIAA0247	9766	-378	CGI-N-Shore	TRUE	FALSE	FALSE
cg03484180	chr3	49967517	49967518	MON1A	84315	-71	CGI	TRUE	FALSE	FALSE
cg22789714	chr11	46261208	46261209	CREB3L1	90993	-38018	CGI-S-Shore	FALSE	FALSE	TRUE
cg18303397	chr3	129160135	129160136	IFT122	55764	1166	CGI-S-Shore	TRUE	TRUE	FALSE
cg18568067	chr11	46373641	46373642	DGKZ	8525	19185	Non-CGI	FALSE	TRUE	FALSE
cg21585707	chr7	5535302	5535303	MIR589	693174	244	CGI-S-Shore	FALSE	TRUE	FALSE
cg26729380	chr6	31543655	31543656	TNF	7124	304	Non-CGI	TRUE	FALSE	FALSE
cg01205831	chr9	130699236	130699237	DPM2	8818	1525	CGI-N-Shore	FALSE	TRUE	FALSE
ch.6.33611621F	chr6	33503643	33503645	BAK1	578	44424	CGI-S-Shelf	FALSE	FALSE	TRUE
cg26210267	chr4	668877	668878	ATP5I	521	-749	CGI-S-Shore	TRUE	FALSE	FALSE
cg18502099	chr17	77833495	77833496	CBX4	8535	-20281	CGI-N-Shore	FALSE	FALSE	TRUE
cg06826457	chr12	12867669	12867670	CDKN1B	1027	-2631	CGI-N-Shelf	FALSE	FALSE	TRUE
cg06647068	chr12	104853274	104853275	CHST11	50515	2581	CGI-S-Shore	FALSE	TRUE	FALSE
cg01747664	chr1	36614437	36614438	TRAPPC3	27095	628	CGI-N-Shore	FALSE	TRUE	FALSE
cg11870100	chr11	34534542	34534543	ELF5	2001	803	CGI-N-Shore	TRUE	TRUE	FALSE
cg10917602	chr16	30996630	30996631	HSD3B7	80270	110	CGI-S-Shore	TRUE	TRUE	FALSE
cg12939283	chr6	33044012	33044013	HLA-DPB1	3115	308	Non-CGI	FALSE	TRUE	FALSE
cg06669752	chr5	138534431	138534432	SIL1	64374	-365	CGI-S-Shore	TRUE	FALSE	FALSE
cg17326451	chr7	86975534	86975535	CROT	54677	582	CGI-S-Shore	TRUE	TRUE	FALSE
cg08905130	chr17	17584403	17584404	RAI1	10743	-382	CGI-N-Shore	TRUE	FALSE	FALSE
cg18338984	chr7	2646955	2646956	TTYH3	80727	-24646	CGI	FALSE	TRUE	FALSE
cg04321396	chr11	65480401	65480402	KAT5	10524	927	CGI-S-Shore	TRUE	TRUE	FALSE
cg13657200	chr9	117266029	117266030	DFNB31	25861	1705	CGI-N-Shore	TRUE	TRUE	FALSE
cg00638574	chr1	209956565	209956566	C1orf74	148304	1323	CGI-N-Shore	TRUE	TRUE	FALSE
cg03568305	chr17	38183559	38183560	SNORD124	100113390	-234	CGI-S-Shore	TRUE	TRUE	FALSE
cg19991948	chr10	121335173	121335174	TIAL1	7073	21366	Non-CGI	FALSE	TRUE	FALSE
cg01146808	chr6	106551368	106551369	PRDM1	639	17172	CGI-N-Shore	FALSE	TRUE	FALSE
cg16686396	chr1	3282870	3282871	ARHGEF16	27237	-88275	CGI	FALSE	TRUE	FALSE
cg05845765	chr7	101880148	101880149	SH2B2	10603	-48255	CGI-N-Shelf	FALSE	TRUE	FALSE
cg06180869	chr11	76446769	76446770	GUCY2EP	390226	-13935	Non-CGI	FALSE	FALSE	TRUE
cg27346545	chr20	1205378	1205379	RAD21L1	642636	-1384	CGI-N-Shore	TRUE	FALSE	FALSE
cg04955333	chr7	2647414	2647415	TTYH3	80727	-24187	CGI-S-Shore	FALSE	TRUE	FALSE
cg21406967	chr7	100464553	100464554	TRIP6	7205	-395	CGI-S-Shore	TRUE	TRUE	FALSE
cg03090969	chr8	104117866	104117867	BAALC	79870	-35053	Non-CGI	FALSE	FALSE	TRUE
cg06142740	chr2	28973577	28973578	PPP1CB	5500	-1033	CGI-N-Shore	TRUE	FALSE	FALSE
cg23461714	chr11	113184990	113184991	TTC12	54970	-259	CGI-N-Shore	TRUE	FALSE	FALSE
cg12197142	chr17	73629245	73629246	SMIM5	643008	-267	CGI-S-Shore	TRUE	TRUE	FALSE
cg02170478	chr4	55100995	55100996	GSX2	170825	134746	CGI-S-Shore	FALSE	TRUE	FALSE
cg26122129	chr8	30241119	30241120	RBPMS	11030	-823	CGI	TRUE	TRUE	FALSE
cg11152412	chr15	74927688	74927689	CLK3	1198	26974	Non-CGI	FALSE	TRUE	FALSE
cg05157098	chr12	72059293	72059294	ZFC3H1	196441	-1543	CGI-S-Shore	TRUE	TRUE	FALSE
cg13732465	chr9	139549756	139549757	EGFL7	51162	-3550	CGI-S-Shore	FALSE	TRUE	FALSE
cg04080625	chr1	15426634	15426635	TMEM51-AS1	200197	52324	Non-CGI	TRUE	TRUE	FALSE
cg05331060	chr6	31459999	31460000	MICB	4277	-2657	CGI-N-Shore	FALSE	FALSE	TRUE
cg08138505	chr11	67118746	67118747	POLD4	57804	2304	CGI-N-Shelf	FALSE	TRUE	FALSE
cg04313338	chr16	55735794	55735795	CES1P2	390732	-23041	Non-CGI	FALSE	TRUE	FALSE
cg11992940	chr17	34094454	34094455	C17orf50	146853	6537	CGI-S-Shore	FALSE	TRUE	FALSE
cg11218561	chr11	1050743	1050744	MUC6	4588	-14036	CGI-N-Shore	FALSE	FALSE	TRUE
cg18490846	chr17	48845722	48845723	LINC00483	55018	-803	Non-CGI	TRUE	FALSE	FALSE
cg02047661	chr3	51976883	51976884	PARP3	10039	521	CGI-S-Shore	TRUE	TRUE	FALSE
cg14836018	chr14	51706425	51706426	TMX1	81542	-459	CGI-N-Shore	TRUE	FALSE	FALSE
cg13100137	chr1	37937945	37937946	LOC728431	728431	2097	CGI-N-Shore	FALSE	TRUE	FALSE
cg25371036	chr11	94500749	94500750	AMOTL1	154810	-757	CGI-N-Shore	TRUE	FALSE	FALSE
cg11231631	chr11	60553755	60553756	MS4A10	341116	933	Non-CGI	FALSE	TRUE	FALSE
cg13443911	chr9	101866107	101866108	TGFBR1	7046	-1303	CGI-N-Shore	TRUE	FALSE	FALSE
cg26628907	chr17	38195238	38195239	SNORD124	100113390	11442	Non-CGI	FALSE	TRUE	FALSE
cg13665684	chr7	30840711	30840712	FAM188B	84182	29677	Non-CGI	FALSE	TRUE	FALSE
cg07408456	chr19	15590532	15590533	PGLYRP2	114770	-216	Non-CGI	TRUE	FALSE	FALSE
cg24921858	chr12	12223989	12223990	BCL2L14	79370	110	Non-CGI	TRUE	TRUE	FALSE
cg20608990	chr2	202097607	202097608	CASP8	841	-557	Non-CGI	TRUE	FALSE	FALSE
cg18144404	chr5	159247072	159247073	ADRA1B	147	-96666	Non-CGI	FALSE	FALSE	TRUE
cg06829788	chr1	228581405	228581406	TRIM11	81559	13110	CGI-N-Shore	FALSE	TRUE	FALSE
cg24512093	chr3	78698151	78698152	ROBO1	6091	1118906	Non-CGI	FALSE	TRUE	FALSE
cg14934280	chr19	47494587	47494588	NPAS1	4861	-28512	Non-CGI	FALSE	TRUE	FALSE
cg23386330	chr11	13977556	13977557	SPON1	10418	-6626	Non-CGI	FALSE	FALSE	TRUE
cg23126342	chr13	67801125	67801126	PCDH9	5101	3341	CGI-N-Shelf	FALSE	TRUE	FALSE
cg10661163	chr7	116592959	116592960	ST7	7982	-420	CGI-N-Shore	TRUE	FALSE	FALSE
cg21700772	chr7	1644443	1644444	TFAMP1	260341	-9661	CGI-S-Shore	FALSE	FALSE	TRUE
cg08118354	chr9	35870488	35870489	OR13J1	392309	-89	Non-CGI	TRUE	FALSE	FALSE
cg27492942	chr17	36885965	36885966	CISD3	284106	-543	CGI-N-Shore	TRUE	TRUE	FALSE
cg02903680	chr15	85526198	85526199	PDE8A	5151	2453	CGI-S-Shore	FALSE	TRUE	FALSE
cg20974826	chr6	33141040	33141041	COL11A2	1302	19203	Non-CGI	FALSE	TRUE	FALSE
cg16047471	chr12	26274563	26274564	BHLHE41	79365	3438	CGI-N-Shore	TRUE	TRUE	FALSE
cg04411841	chr16	58033649	58033650	ZNF319	57567	111	CGI-S-Shore	TRUE	FALSE	FALSE
cg07258627	chr20	4721683	4721684	PRNT	149830	-368	Non-CGI	TRUE	FALSE	FALSE
cg09395195	chr17	29645782	29645783	EVI2A	2123	2983	Non-CGI	TRUE	TRUE	FALSE
cg23003085	chr11	64084321	64084322	TRMT112	51504	710	CGI-N-Shore	TRUE	TRUE	FALSE
cg06021990	chr13	28912746	28912747	FLT1	2321	156517	Non-CGI	FALSE	TRUE	FALSE
cg25009842	chr6	157505558	157505559	TMEM242	729515	239693	CGI	FALSE	TRUE	FALSE
cg01594949	chr9	140197890	140197891	NRARP	441478	-1186	CGI-S-Shore	TRUE	FALSE	FALSE
cg09342225	chr11	101668461	101668462	KIAA1377	57562	-117283	Non-CGI	FALSE	FALSE	TRUE
cg13835114	chr9	133327530	133327531	ASS1	445	7435	Non-CGI	FALSE	TRUE	FALSE
cg04496906	chr8	145101182	145101183	OPLAH	26873	14400	CGI-N-Shore	FALSE	TRUE	FALSE
cg00733493	chr7	45126655	45126656	NACAD	23148	1836	CGI-N-Shore	FALSE	TRUE	FALSE
cg11412248	chr15	78930962	78930963	CHRNA3	1136	-17324	CGI-N-Shelf	FALSE	TRUE	FALSE
cg14074174	chr19	7986206	7986207	SNAPC2	6618	1011	CGI-S-Shore	FALSE	TRUE	FALSE
cg22299097	chr3	97690590	97690591	MINA	84864	703	CGI-N-Shore	FALSE	TRUE	FALSE
cg02151301	chr20	30101785	30101786	HM13	81502	-454	CGI-N-Shore	TRUE	FALSE	FALSE
cg20222376	chr19	15530606	15530607	AKAP8L	26993	-772	CGI-S-Shore	TRUE	FALSE	FALSE
cg06060874	chr1	3269315	3269316	ARHGEF16	27237	-101830	CGI	FALSE	TRUE	FALSE
cg08352439	chr7	55637123	55637124	VOPP1	81552	3075	CGI-N-Shelf	FALSE	TRUE	FALSE
cg00329615	chr3	118706648	118706649	IGSF11	152404	158248	Non-CGI	FALSE	TRUE	FALSE
cg14334310	chr14	103558502	103558503	EXOC3L4	91828	-7977	CGI-S-Shore	FALSE	FALSE	TRUE
cg26158023	chr3	42881414	42881415	CCBP2	1238	35167	Non-CGI	FALSE	TRUE	FALSE
cg23615741	chr10	101297642	101297643	NKX2-3	159296	4951	CGI	FALSE	FALSE	TRUE
cg06761203	chr12	58147888	58147889	2009-03-01	92979	-991	CGI-S-Shore	TRUE	FALSE	FALSE
cg25943480	chr14	20883979	20883980	TEP1	7011	-2399	CGI-S-Shelf	FALSE	FALSE	TRUE
cg24058132	chr14	88459866	88459867	GALC	2581	141	CGI-S-Shore	TRUE	FALSE	FALSE
cg22580512	chr12	125002474	125002475	NCOR2	9612	49534	CGI	FALSE	TRUE	FALSE
cg13072940	chr3	49967521	49967522	MON1A	84315	-75	CGI	TRUE	FALSE	FALSE
cg04594378	chr16	85181102	85181103	LOC400548	400548	10345	CGI	FALSE	TRUE	FALSE
cg00199059	chr20	45317219	45317220	TP53RK	112858	1055	CGI-N-Shore	FALSE	TRUE	FALSE
cg09864227	chr1	1008207	1008208	RNF223	401934	1478	CGI-S-Shore	TRUE	TRUE	FALSE
cg27401724	chr17	43213629	43213630	ACBD4	79777	3661	CGI-S-Shore	TRUE	TRUE	FALSE
cg11836829	chr1	212605702	212605703	NENF	29937	-525	CGI-N-Shore	TRUE	FALSE	FALSE
cg27209729	chr11	64428925	64428926	NRXN2	9379	61733	Non-CGI	FALSE	TRUE	FALSE
cg13817265	chr12	24104357	24104358	MIR920	100126320	-260996	CGI-S-Shore	TRUE	TRUE	FALSE
cg05203217	chr20	43730072	43730073	KCNS1	3787	-318	CGI-S-Shore	TRUE	FALSE	FALSE
cg07747616	chr6	7729794	7729795	BMP6	654	2782	CGI-S-Shore	FALSE	TRUE	FALSE
cg12492496	chr19	18271859	18271860	PIK3R2	5296	7842	CGI-N-Shore	FALSE	TRUE	FALSE
cg14035521	chr9	37486469	37486470	POLR1E	64425	523	CGI-S-Shore	TRUE	TRUE	FALSE
cg00451635	chr16	10675030	10675031	EMP2	2013	-490	CGI-S-Shore	TRUE	FALSE	FALSE
cg22730004	chr1	158656718	158656719	SPTA1	6708	-211	Non-CGI	TRUE	FALSE	FALSE
cg11287987	chr17	41837048	41837049	SOST	50964	-891	CGI-S-Shelf	TRUE	FALSE	FALSE
cg13852561	chr9	140302117	140302118	EXD3	54932	15595	CGI	FALSE	TRUE	FALSE
cg03572680	chr11	124768554	124768555	ROBO4	54538	-722	Non-CGI	TRUE	FALSE	FALSE
cg22551065	chr5	126565698	126565699	MEGF10	84466	-60756	CGI-S-Shore	FALSE	FALSE	TRUE
cg20153322	chr12	120703977	120703978	PXN	5829	-402	CGI-S-Shore	TRUE	FALSE	FALSE
cg08426733	chr1	1376740	1376741	VWA1	64856	5836	CGI-S-Shore	FALSE	TRUE	FALSE
cg18576057	chr15	98982463	98982464	FAM169B	283777	75146	Non-CGI	FALSE	TRUE	FALSE
cg01622018	chr17	34122943	34122944	MMP28	79148	-302	CGI-S-Shore	TRUE	FALSE	FALSE
cg16235197	chr12	111758873	111758874	FAM109A	144717	48050	CGI-S-Shore	FALSE	TRUE	FALSE
cg19908207	chr5	137610645	137610646	GFRA3	2676	-391	CGI-S-Shore	TRUE	FALSE	FALSE
cg14042143	chr7	2646782	2646783	TTYH3	80727	-24819	CGI	FALSE	TRUE	FALSE
cg27290215	chr10	116392933	116392934	ABLIM1	3983	135084	CGI-S-Shore	TRUE	TRUE	FALSE
cg00533891	chr10	80919242	80919243	ZMIZ1	57178	90449	Non-CGI	FALSE	TRUE	FALSE
cg06599169	chr19	17973311	17973312	SNORA68	26780	-84	CGI-S-Shore	TRUE	TRUE	FALSE
ch.1.839062R	chr1	25282539	25282541	RUNX3	864	9070	Non-CGI	FALSE	TRUE	FALSE
cg16139785	chr14	103088924	103088925	RCOR1	23186	29927	Non-CGI	FALSE	TRUE	FALSE
cg14129473	chr5	10695241	10695242	DAP	1611	66144	Non-CGI	FALSE	TRUE	FALSE
cg19408882	chr17	34101272	34101273	C17orf50	146853	13355	CGI-S-Shelf	FALSE	TRUE	FALSE
cg22940798	chr6	32805554	32805555	TAP2	6891	991	CGI-N-Shore	TRUE	TRUE	FALSE
cg26808293	chr16	3072207	3072208	THOC6	79228	-1823	CGI-S-Shore	TRUE	TRUE	FALSE
cg00698916	chr6	13767628	13767629	CCDC90A	63933	47162	CGI-N-Shore	FALSE	FALSE	TRUE
cg08876103	chr1	39572323	39572324	MACF1	23499	25233	CGI-S-Shore	FALSE	TRUE	FALSE
cg05557932	chr16	3929351	3929352	CREBBP	1387	768	CGI-N-Shore	FALSE	TRUE	FALSE
cg17156491	chr2	43259508	43259509	ZFP36L2	678	194235	Non-CGI	FALSE	FALSE	TRUE
cg19510626	chr1	113934971	113934972	MAGI3	260425	1495	CGI-S-Shore	FALSE	TRUE	FALSE
cg13494087	chr9	110266728	110266729	KLF4	9314	-14680	Non-CGI	FALSE	FALSE	TRUE
cg15913671	chr17	79304420	79304421	TMEM105	284186	52	Non-CGI	TRUE	FALSE	FALSE
cg03055693	chr20	60910388	60910389	MIR4758	100616340	-2771	CGI-N-Shore	FALSE	TRUE	FALSE
cg01268763	chr14	53618419	53618420	DDHD1	80821	1625	CGI-N-Shore	FALSE	TRUE	FALSE
cg09487078	chr6	167525398	167525399	GPR31	2853	45919	Non-CGI	TRUE	TRUE	FALSE
cg19670290	chr15	91477210	91477211	HDDC3	374659	-1435	CGI-S-Shore	TRUE	TRUE	FALSE
cg15704699	chr17	26439377	26439378	NLK	51701	69688	Non-CGI	FALSE	TRUE	FALSE
cg06419793	chr19	11376508	11376509	DOCK6	57572	-3350	CGI-S-Shelf	FALSE	FALSE	TRUE
cg05825121	chr4	67950111	67950112	CENPC1	1060	461143	Non-CGI	FALSE	FALSE	TRUE
cg14747813	chr8	23848786	23848787	STC1	6781	-136465	Non-CGI	FALSE	FALSE	TRUE
cg10803722	chr21	46713166	46713167	LOC642852	642852	5198	CGI-N-Shore	FALSE	TRUE	FALSE
cg23972551	chr11	68151664	68151665	LRP5	4041	71555	CGI-S-Shelf	FALSE	TRUE	FALSE
cg06777902	chr10	127622996	127622997	FANK1	92565	37887	Non-CGI	FALSE	TRUE	FALSE
cg19421125	chr12	6882856	6882857	LAG3	3902	1185	CGI	FALSE	TRUE	FALSE
cg05809481	chr1	156696467	156696468	ISG20L2	81875	1742	CGI-N-Shore	TRUE	TRUE	FALSE
cg03506372	chr11	60897603	60897604	CD5	921	27672	CGI	FALSE	FALSE	TRUE
cg08877357	chr10	113120532	113120533	ADRA2A	150	283741	Non-CGI	FALSE	FALSE	TRUE
cg23254047	chr10	38264940	38264941	ZNF25	219749	511	CGI-N-Shore	FALSE	TRUE	FALSE
cg26575914	chr1	228397977	228397978	OBSCN	84033	2115	CGI-N-Shore	FALSE	TRUE	FALSE
cg19050940	chr13	76445108	76445109	LMO7	4008	250537	Non-CGI	TRUE	FALSE	FALSE
cg24481841	chr19	52203721	52203722	LINC00085	147650	7127	CGI-N-Shelf	FALSE	TRUE	FALSE
cg06460691	chr5	74162851	74162852	FAM169A	26049	28935	CGI	TRUE	TRUE	FALSE
cg06943835	chr11	64662577	64662578	MIR194-2	406970	-3665	CGI	TRUE	TRUE	FALSE
cg14010720	chr20	62168878	62168879	PTK6	5753	-170	CGI	TRUE	FALSE	FALSE
cg00474657	chr16	28989308	28989309	SPNS1	83985	3211	CGI-S-Shelf	FALSE	TRUE	FALSE
cg27166177	chr22	49498376	49498377	LOC100128946	100128946	235793	CGI	FALSE	FALSE	TRUE
cg23437216	chr12	49491879	49491880	DHH	50846	-3276	CGI-S-Shelf	FALSE	TRUE	FALSE
cg26721803	chr6	30690844	30690845	TUBB	203068	2686	CGI-S-Shore	FALSE	TRUE	FALSE
cg25822709	chr9	19048850	19048851	RRAGA	10670	-520	CGI-N-Shore	TRUE	FALSE	FALSE
cg00817377	chr7	73441057	73441058	ELN	2006	-1368	CGI-N-Shore	TRUE	FALSE	FALSE
cg11807280	chr2	66654644	66654645	MEIS1	4211	-7886	CGI-S-Shore	FALSE	FALSE	TRUE
cg14095048	chr22	25342876	25342877	TMEM211	255349	-7561	Non-CGI	FALSE	FALSE	TRUE
cg19344626	chr19	16830749	16830750	NWD1	284434	-36	Non-CGI	TRUE	FALSE	FALSE
cg18450254	chr3	64200005	64200006	PRICKLE2	166336	11124	Non-CGI	FALSE	TRUE	FALSE
cg20724257	chr6	32407784	32407785	HLA-DRA	3122	164	Non-CGI	TRUE	FALSE	FALSE
cg14517133	chr6	42664420	42664421	PRPH2	5961	25936	Non-CGI	FALSE	TRUE	FALSE
cg18237330	chr10	80767136	80767137	ZMIZ1-AS1	283050	61398	Non-CGI	FALSE	TRUE	FALSE
cg12667125	chr1	36181447	36181448	C1orf216	127703	3341	CGI-N-Shelf	TRUE	TRUE	FALSE
cg25424279	chr11	65683543	65683544	C11orf68	83638	2986	CGI-N-Shore	FALSE	FALSE	TRUE
cg16682903	chr2	158694670	158694671	ACVR1	90	37702	Non-CGI	FALSE	TRUE	FALSE
cg14480266	chr11	23134523	23134524	CCDC179	100500938	-252550	Non-CGI	FALSE	FALSE	TRUE
cg00684075	chr2	85969661	85969662	ATOH8	84913	-11246	Non-CGI	FALSE	FALSE	TRUE
cg02851873	chr10	80907003	80907004	ZMIZ1	57178	78210	Non-CGI	FALSE	TRUE	FALSE
cg16782084	chr3	133777381	133777382	SLCO2A1	6578	-28460	Non-CGI	FALSE	FALSE	TRUE
cg00095259	chr18	59218797	59218798	CDH20	28316	217808	CGI-N-Shelf	FALSE	TRUE	FALSE
cg04109092	chr7	2647852	2647853	TTYH3	80727	-23749	CGI-S-Shore	FALSE	TRUE	FALSE
cg07125243	chr8	108351562	108351563	ANGPT1	284	158690	Non-CGI	FALSE	TRUE	FALSE
cg25930644	chr17	8531915	8531916	MYH10	4628	2119	CGI-N-Shore	FALSE	TRUE	FALSE
cg05346491	chr19	48917104	48917105	GRIN2D	2906	18971	CGI-N-Shore	FALSE	TRUE	FALSE
cg16742481	chr4	157090555	157090556	CTSO	1519	-215506	Non-CGI	FALSE	FALSE	TRUE
cg09884851	chr12	79809356	79809357	MIR1252	100302136	-3679	Non-CGI	FALSE	TRUE	FALSE
cg19335412	chr10	90694875	90694876	FAS	355	-34676	Non-CGI	FALSE	TRUE	FALSE
cg16276108	chr5	180213189	180213190	MGAT1	4245	29350	Non-CGI	FALSE	FALSE	TRUE
cg15393702	chr18	21243529	21243530	ANKRD29	147463	-679	CGI-S-Shore	TRUE	FALSE	FALSE
cg03313447	chr19	41829042	41829043	CCDC97	90324	12947	CGI-N-Shelf	FALSE	TRUE	FALSE
cg17343374	chr4	901981	901982	GAK	2580	24191	CGI	FALSE	TRUE	FALSE
cg05237436	chr5	138533428	138533429	SIL1	64374	635	CGI-N-Shore	FALSE	TRUE	FALSE
cg01882991	chr6	6677756	6677757	LY86-AS1	285780	-54696	Non-CGI	FALSE	FALSE	TRUE
cg16882373	chr7	26191458	26191459	NFE2L3	9603	-387	CGI-N-Shore	TRUE	FALSE	FALSE
cg19381811	chr3	49851713	49851714	UBA7	7318	-321	Non-CGI	TRUE	FALSE	FALSE
cg01205011	chr6	35262113	35262114	DEF6	50619	-3480	CGI-N-Shelf	FALSE	TRUE	FALSE
cg20592734	chr6	33142317	33142318	COL11A2	1302	17926	Non-CGI	FALSE	TRUE	FALSE
cg00552892	chr2	220035927	220035928	SLC23A3	151295	-1109	Non-CGI	TRUE	FALSE	FALSE
cg23320649	chr3	50604613	50604614	HEMK1	51409	-1968	CGI-N-Shore	TRUE	TRUE	FALSE
cg09648727	chr17	79361742	79361743	BAHCC1	57597	-11796	CGI	FALSE	FALSE	TRUE
cg22079043	chr11	1785631	1785632	MOB2	81532	-129	CGI	TRUE	FALSE	FALSE
cg11472786	chr3	13522261	13522262	HDAC11	79885	1036	CGI-S-Shore	FALSE	TRUE	FALSE
cg00906812	chr3	47018657	47018658	CCDC12	151903	-386	CGI-S-Shore	TRUE	FALSE	FALSE
cg00108098	chr3	122637664	122637665	LOC100129550	100129550	32303	CGI-N-Shelf	FALSE	TRUE	FALSE
cg10608615	chr5	169780747	169780748	KCNIP1	30820	-132	Non-CGI	TRUE	FALSE	FALSE
cg11380327	chr2	24715213	24715214	NCOA1	8648	-71964	CGI	FALSE	FALSE	TRUE
cg09530108	chr2	36586710	36586711	CRIM1	51232	3339	CGI-S-Shore	FALSE	TRUE	FALSE
cg07069636	chr16	30671749	30671750	FBRS	64319	505	CGI	TRUE	TRUE	FALSE
cg00308841	chr5	90790737	90790738	ARRDC3	57561	-111587	Non-CGI	FALSE	FALSE	TRUE
cg27130665	chr11	40316514	40316515	LRRC4C	57689	1164807	CGI-S-Shore	TRUE	TRUE	FALSE
cg18964582	chr1	236557182	236557183	EDARADD	128178	-496	CGI-N-Shore	TRUE	FALSE	FALSE
cg25268718	chr14	24604711	24604712	PSME1	5720	-665	CGI-N-Shore	TRUE	FALSE	FALSE
cg06205331	chr3	124303268	124303269	UMPS	7372	-145943	CGI-N-Shore	TRUE	TRUE	FALSE
cg21120249	chr9	139921971	139921972	C9orf139	401563	54	CGI-N-Shore	TRUE	TRUE	FALSE
cg01102854	chr11	63605717	63605718	MARK2	2011	-681	CGI-N-Shore	TRUE	FALSE	FALSE
cg04036898	chr1	46664598	46664599	LURAP1	541468	-4406	CGI-S-Shore	TRUE	TRUE	FALSE
cg18310639	chr1	223904225	223904226	CAPN2	824	14929	CGI-S-Shelf	FALSE	TRUE	FALSE
cg23035419	chr20	3066014	3066015	AVP	551	-643	CGI-S-Shore	TRUE	FALSE	FALSE
cg15298486	chr10	102046690	102046691	BLOC1S2	282991	-250	CGI-S-Shore	TRUE	FALSE	FALSE
cg18363008	chr17	4675114	4675115	TM4SF5	9032	-71	Non-CGI	TRUE	FALSE	FALSE
cg03013070	chr10	95965579	95965580	LOC100128054	100128054	81246	Non-CGI	FALSE	TRUE	FALSE
cg27430293	chr16	89069935	89069936	CBFA2T3	863	-26430	CGI	FALSE	FALSE	TRUE
cg12068124	chr19	1238538	1238539	C19orf26	255057	-547	CGI	TRUE	FALSE	FALSE
cg23437162	chr3	49067151	49067152	IMPDH2	3615	-275	CGI-S-Shore	TRUE	TRUE	FALSE
cg14438325	chr9	124023910	124023911	RAB14	51552	-59544	Non-CGI	FALSE	TRUE	FALSE
cg13120986	chr12	7168012	7168013	LPCAT3	10162	-42169	Non-CGI	TRUE	TRUE	FALSE
cg17206420	chr2	27482803	27482804	SLC30A3	7781	15383	CGI-N-Shelf	TRUE	TRUE	FALSE
cg14614643	chr1	56646507	56646508	PPAP2B	8613	398748	Non-CGI	FALSE	FALSE	TRUE
cg16014412	chr1	9687471	9687472	PIK3CD	5293	-24317	CGI	FALSE	FALSE	TRUE
cg22075924	chr1	78005352	78005353	ZZZ3	26009	143750	Non-CGI	FALSE	TRUE	FALSE
cg03956042	chr3	194206497	194206498	FLJ34208	401106	-1370	CGI-N-Shore	TRUE	FALSE	FALSE
cg14394939	chr21	18983396	18983397	BTG3	10950	1870	CGI-N-Shore	FALSE	TRUE	FALSE
cg11367633	chr20	40247916	40247917	CHD6	84181	-782	CGI-S-Shore	TRUE	FALSE	FALSE
cg17188384	chr13	97874279	97874280	MBNL2	10150	-293	Non-CGI	TRUE	FALSE	FALSE
cg09411874	chr12	121905955	121905956	RNF34	80196	68052	CGI-S-Shore	TRUE	TRUE	FALSE
cg22006825	chr19	41771771	41771772	HNRNPUL1	11100	3379	CGI-S-Shore	FALSE	TRUE	FALSE
cg04896437	chr1	202076492	202076493	GPR37L1	9283	-15535	Non-CGI	FALSE	FALSE	TRUE
cg06914505	chr15	39464601	39464602	C15orf54	400360	-78282	Non-CGI	FALSE	FALSE	TRUE
cg01881062	chr1	6660403	6660404	KLHL21	9903	2524	CGI-S-Shore	TRUE	TRUE	FALSE
cg20469744	chr13	43949447	43949448	DNAJC15	29103	352084	Non-CGI	FALSE	TRUE	FALSE
cg11412468	chr2	84433405	84433406	FUNDC2P2	388965	-84399	Non-CGI	FALSE	FALSE	TRUE
cg18186343	chr14	101317620	101317621	MIR770	768222	-1105	Non-CGI	TRUE	TRUE	FALSE
cg09935271	chr19	19643534	19643535	CILP2	148113	-5538	CGI-S-Shore	FALSE	TRUE	FALSE
cg03995156	chr6	32122864	32122865	LOC100507547	100507547	-721	CGI-S-Shore	TRUE	TRUE	FALSE
cg04200607	chr10	72163475	72163476	EIF4EBP2	1979	-384	CGI-N-Shore	TRUE	FALSE	FALSE
cg03438552	chr6	32805548	32805549	TAP2	6891	997	CGI-N-Shore	TRUE	TRUE	FALSE
cg03894990	chr6	44309765	44309766	AARS2	57505	-28701	CGI-N-Shore	TRUE	TRUE	FALSE
cg22128645	chr1	93425802	93425803	FAM69A	388650	1275	CGI-N-Shore	FALSE	TRUE	FALSE
cg09927651	chr17	1090869	1090870	ABR	29	-252	CGI-N-Shelf	TRUE	FALSE	FALSE
cg10195687	chr14	74926396	74926397	MIR4709	100616211	20509	Non-CGI	FALSE	FALSE	TRUE
cg17454234	chr7	100964669	100964670	RABL5	64792	422	CGI-N-Shore	FALSE	TRUE	FALSE
cg01567771	chr14	22191382	22191383	OR4E2	26686	58084	Non-CGI	TRUE	FALSE	FALSE
cg23149300	chr10	36958940	36958941	ANKRD30A	91074	-455843	Non-CGI	FALSE	FALSE	TRUE
cg20012537	chr10	134928794	134928795	GPR123	84435	44360	CGI-S-Shore	FALSE	TRUE	FALSE
cg22862003	chr21	42797588	42797589	MX1	4599	5067	CGI-N-Shore	TRUE	TRUE	FALSE
cg03929796	chr3	52231840	52231841	ALAS1	211	-257	CGI-N-Shore	TRUE	FALSE	FALSE
cg14609289	chr17	77083037	77083038	ENGASE	64772	12017	CGI	FALSE	TRUE	FALSE
cg25311470	chr7	107950866	107950867	NRCAM	4897	145973	Non-CGI	FALSE	TRUE	FALSE
cg25744957	chr4	7106195	7106196	FLJ36777	730971	-1091	CGI-S-Shore	TRUE	FALSE	FALSE
cg01676322	chr17	43213429	43213430	ACBD4	79777	3461	CGI-S-Shore	TRUE	TRUE	FALSE
cg17903590	chr1	28623081	28623082	MED18	54797	-32430	Non-CGI	FALSE	FALSE	TRUE
cg03114057	chr17	72362302	72362303	GPR142	350383	-1341	Non-CGI	TRUE	FALSE	FALSE
cg05114959	chr22	50148372	50148373	LOC90834	90834	25584	CGI-S-Shore	FALSE	FALSE	TRUE
cg14600885	chr5	150040280	150040281	MYOZ3	91977	-122	CGI-S-Shelf	TRUE	FALSE	FALSE
cg14034476	chr19	3556718	3556719	MFSD12	126321	851	CGI-N-Shore	FALSE	TRUE	FALSE
cg02490920	chr3	50304406	50304407	SEMA3B	7869	-632	Non-CGI	TRUE	FALSE	FALSE
cg18464726	chr12	6305192	6305193	CD9	928	-4288	CGI-N-Shelf	FALSE	FALSE	TRUE
cg26450750	chr4	87816983	87816984	C4orf36	132989	-3407	CGI-S-Shelf	FALSE	FALSE	TRUE
cg12585028	chr12	25347695	25347696	CASC1	55259	397	CGI-N-Shore	TRUE	TRUE	FALSE
cg27193080	chr3	129160612	129160613	IFT122	55764	1643	CGI-S-Shore	TRUE	TRUE	FALSE
cg01851782	chr16	49442215	49442216	C16orf78	123970	34406	CGI-S-Shore	FALSE	FALSE	TRUE
cg03643998	chr17	77042455	77042456	LOC100507410	100507410	-18717	CGI	FALSE	TRUE	FALSE
cg05007163	chr22	39266069	39266070	CBX6	23466	2187	CGI-N-Shore	FALSE	TRUE	FALSE
cg01538305	chr14	100658948	100658949	DEGS2	123099	-32935	CGI	FALSE	FALSE	TRUE
cg01824618	chr16	85315212	85315213	LINC00311	197196	-1350	CGI-N-Shelf	TRUE	FALSE	FALSE
cg20811755	chr17	46618614	46618615	HOXB2	3212	3777	CGI-N-Shore	FALSE	FALSE	TRUE
cg02747254	chr16	29938183	29938184	KCTD13	253980	-637	CGI-S-Shore	TRUE	TRUE	FALSE
cg15728320	chr1	47658945	47658946	PDZK1IP1	10158	-3173	Non-CGI	FALSE	FALSE	TRUE
cg13640414	chr19	15530870	15530871	AKAP8L	26993	-1036	CGI-S-Shore	TRUE	FALSE	FALSE
cg18708252	chr22	39545030	39545031	CBX7	23492	3506	CGI-S-Shelf	FALSE	TRUE	FALSE
cg23798387	chr17	26972805	26972806	KIAA0100	9703	-627	CGI-S-Shore	TRUE	FALSE	FALSE
cg21840875	chr22	39910631	39910632	ATF4	468	-5936	Non-CGI	FALSE	TRUE	FALSE
cg15125438	chr12	113684389	113684390	TPCN1	53373	25128	Non-CGI	FALSE	TRUE	FALSE
cg13449257	chr9	137355128	137355129	MIR4669	100616236	83870	CGI-N-Shore	FALSE	FALSE	TRUE
cg21957813	chr11	44638520	44638521	CD82	3732	51378	Non-CGI	FALSE	TRUE	FALSE
cg04762312	chr6	157800071	157800072	ZDHHC14	79683	-2484	CGI-N-Shore	FALSE	FALSE	TRUE
cg15588941	chr3	48936565	48936566	SLC25A20	788	-138	CGI-S-Shore	TRUE	FALSE	FALSE
cg18018313	chr2	227657192	227657193	IRS1	3667	6312	CGI-S-Shore	FALSE	TRUE	FALSE
cg12408494	chr3	171757077	171757078	FNDC3B	64778	-339	CGI-N-Shore	TRUE	FALSE	FALSE
cg00246121	chr5	141030607	141030608	FCHSD1	89848	377	CGI-N-Shore	TRUE	TRUE	FALSE
cg22129180	chr8	49892980	49892981	SNAI2	6591	-58980	CGI-S-Shore	FALSE	FALSE	TRUE
cg03061960	chr9	40791476	40791477	ZNF658	26149	44937	CGI-N-Shore	FALSE	TRUE	FALSE
cg16770368	chr11	6673784	6673785	DCHS1	8642	3288	CGI-N-Shelf	FALSE	TRUE	FALSE
cg03698343	chr9	139921892	139921893	C9orf139	401563	-22	CGI-N-Shore	TRUE	TRUE	FALSE
cg14093936	chr15	74726614	74726615	SEMA7A	8482	-314	CGI-S-Shore	TRUE	FALSE	FALSE
cg19254163	chr11	60623782	60623783	PTGDR2	11251	-337	CGI-S-Shelf	TRUE	FALSE	FALSE
cg21586203	chr7	105650441	105650442	SYPL1	6856	102614	CGI-S-Shore	FALSE	TRUE	FALSE
cg25143652	chr20	62168670	62168671	PTK6	5753	35	CGI	TRUE	FALSE	FALSE
cg08285646	chr16	69432500	69432501	TERF2	7014	-12625	Non-CGI	FALSE	FALSE	TRUE
cg02110858	chr8	145028222	145028223	MIR661	724031	-8774	CGI	TRUE	TRUE	FALSE
cg14857193	chr3	125852009	125852010	SLC41A3	54946	-31617	Non-CGI	FALSE	TRUE	FALSE
cg15360181	chr3	143567492	143567493	SLC9A9	285195	-118	Non-CGI	TRUE	FALSE	FALSE
cg10002066	chr13	114896192	114896193	RASA3	22821	1901	CGI-N-Shore	FALSE	TRUE	FALSE
cg08409562	chr6	31737885	31737886	VWA7	80737	7221	CGI-S-Shelf	FALSE	TRUE	FALSE
cg20547295	chr2	69664869	69664870	NFU1	27247	-108	CGI-S-Shore	TRUE	FALSE	FALSE
cg23632752	chr1	3828996	3828997	LOC100133612	100133612	12027	CGI	FALSE	TRUE	FALSE
cg04567334	chr10	73408185	73408186	C10orf105	414152	89394	Non-CGI	FALSE	TRUE	FALSE
cg21962791	chr12	21590305	21590306	PYROXD1	79912	-231	CGI-N-Shore	TRUE	FALSE	FALSE
cg26823505	chr6	35765589	35765590	CLPS	1208	-467	Non-CGI	TRUE	FALSE	FALSE
cg12278474	chr1	5221357	5221358	MIR4417	100616489	-402772	Non-CGI	FALSE	FALSE	TRUE
cg06549479	chr17	36885900	36885901	CISD3	284106	-608	CGI-N-Shore	TRUE	TRUE	FALSE
cg16180082	chr6	159466542	159466543	TAGAP	117289	-357	Non-CGI	TRUE	FALSE	FALSE
cg13319938	chr11	2436251	2436252	TRPM5	29850	8022	CGI	FALSE	TRUE	FALSE
cg15474579	chr6	36645812	36645813	CDKN1A	1026	1574	CGI-N-Shore	TRUE	TRUE	FALSE
cg19036773	chr7	151843255	151843256	GALNT11	63917	120476	Non-CGI	FALSE	TRUE	FALSE
cg24099956	chr11	113907379	113907380	ZBTB16	7704	-23050	CGI-S-Shore	FALSE	FALSE	TRUE
cg14354820	chr8	41691767	41691768	NKX6-3	157848	-48381	Non-CGI	FALSE	TRUE	FALSE
cg01137047	chr6	2970877	2970878	SERPINB6	5269	1520	CGI-N-Shore	FALSE	TRUE	FALSE
cg16554164	chr1	32410678	32410679	PTP4A2	8073	-6689	CGI-S-Shore	FALSE	FALSE	TRUE
cg27291385	chr2	219266135	219266136	MIR26B	407017	-1232	CGI-S-Shore	TRUE	TRUE	FALSE
cg20556951	chr17	45934112	45934113	SP6	80320	-871	CGI-S-Shelf	TRUE	FALSE	FALSE
cg16695548	chr7	43946651	43946652	URGCP-MRPS24	100534592	-419	CGI-S-Shore	TRUE	TRUE	FALSE
cg20152430	chr17	46641504	46641505	HOXB4	3214	14237	CGI-N-Shore	FALSE	TRUE	FALSE
cg13470735	chr1	156678548	156678549	CRABP2	1382	-2939	CGI-S-Shore	FALSE	FALSE	TRUE
cg19816290	chr22	19701515	19701516	SEPT5-GP1BB	100526833	-470	CGI-N-Shore	TRUE	FALSE	FALSE
cg02091100	chr6	42123029	42123030	GUCA1A	2978	-113	Non-CGI	TRUE	FALSE	FALSE
cg26166595	chr11	11998715	11998716	DKK3	27122	32599	Non-CGI	FALSE	TRUE	FALSE
cg18248586	chr11	113329026	113329027	MIR4301	100422855	-8215	Non-CGI	FALSE	TRUE	FALSE
cg01804382	chr6	47278002	47278003	TNFRSF21	27242	-321	CGI-S-Shore	TRUE	FALSE	FALSE
cg02610723	chr16	88850534	88850535	PIEZO1	9780	836	CGI	FALSE	TRUE	FALSE
cg11223101	chr6	33360547	33360548	KIFC1	3833	1233	CGI-S-Shore	FALSE	TRUE	FALSE
cg12686055	chr12	45628262	45628263	PLEKHA8P1	51054	-18472	Non-CGI	FALSE	TRUE	FALSE
cg16630369	chr5	66307391	66307392	CD180	4064	185224	Non-CGI	FALSE	TRUE	FALSE
cg04588380	chr12	53046818	53046819	KRT2	3849	-858	Non-CGI	TRUE	FALSE	FALSE
cg02114954	chr5	176243013	176243014	UNC5A	90249	5452	CGI-N-Shore	FALSE	TRUE	FALSE
cg04519462	chr17	77387741	77387742	RBFOX3	146713	90937	CGI-N-Shore	FALSE	TRUE	FALSE
cg25332357	chr5	180238296	180238297	MGAT1	4245	4243	CGI-S-Shore	TRUE	TRUE	FALSE
cg06533408	chr12	69139618	69139619	SLC35E3	55508	-316	CGI-N-Shore	TRUE	FALSE	FALSE
cg03728674	chr16	88485656	88485657	ZNF469	84627	-8221	CGI	FALSE	FALSE	TRUE
cg03575969	chr11	72492171	72492172	MIR4692	100616410	-2402	CGI-N-Shore	FALSE	TRUE	FALSE
cg04427651	chr1	27152694	27152695	ZDHHC18	84243	-505	CGI-N-Shore	TRUE	TRUE	FALSE
cg00153306	chr3	46741492	46741493	TMIE	259236	-1329	CGI-N-Shore	TRUE	FALSE	FALSE
cg21511948	chr22	37820236	37820237	ELFN2	114794	3267	CGI-S-Shelf	FALSE	TRUE	FALSE
cg16718162	chr1	23963971	23963972	RPL11	6135	-54296	Non-CGI	FALSE	TRUE	FALSE
cg02188818	chr4	141676849	141676850	TBC1D9	23158	620	CGI-N-Shore	FALSE	TRUE	FALSE
cg16001165	chr4	129581866	129581867	PHF17	79960	-148911	Non-CGI	FALSE	FALSE	TRUE
cg03530962	chr3	58475833	58475834	KCTD6	200845	-1988	CGI-N-Shore	TRUE	FALSE	FALSE
cg12597839	chr1	110036141	110036142	CYB561D1	284613	-515	CGI-N-Shore	TRUE	FALSE	FALSE
cg21995800	chr1	111984376	111984377	ATP5F1	515	-7084	Non-CGI	FALSE	TRUE	FALSE
cg24724596	chr19	51892299	51892300	LIM2	3982	-1088	Non-CGI	TRUE	TRUE	FALSE
cg11961813	chr17	40995546	40995547	AOC2	314	-1061	Non-CGI	TRUE	TRUE	FALSE
cg13458211	chr1	44444217	44444218	B4GALT2	8704	-655	CGI-N-Shore	TRUE	FALSE	FALSE
cg18779283	chr3	45636154	45636155	LIMD1	8994	-167	CGI-S-Shore	TRUE	FALSE	FALSE
cg16003790	chr1	205909935	205909936	SLC26A9	115019	2651	Non-CGI	FALSE	TRUE	FALSE
cg06974930	chr1	46633153	46633154	TSPAN1	10103	-7594	CGI-S-Shore	FALSE	TRUE	FALSE
cg01282174	chr11	119630144	119630145	PVRL1	5818	-30708	Non-CGI	FALSE	FALSE	TRUE
cg09814448	chr1	48681284	48681285	SLC5A9	200010	-7071	Non-CGI	FALSE	FALSE	TRUE
cg05265596	chr5	169695565	169695566	LCP2	3937	29255	Non-CGI	TRUE	TRUE	FALSE
cg22363368	chr2	59126860	59126861	FLJ30838	400955	378971	Non-CGI	FALSE	TRUE	FALSE
cg06177599	chr1	11898576	11898577	NPPA-AS1	100379251	-1798	CGI	TRUE	TRUE	FALSE
cg08765100	chr3	64211659	64211660	PRICKLE2	166336	-527	Non-CGI	TRUE	FALSE	FALSE
cg15139254	chr17	72829938	72829939	GRIN2C	2905	27026	CGI-N-Shelf	FALSE	TRUE	FALSE
cg19539667	chr17	43339831	43339832	SPATA32	124783	-351	CGI-S-Shore	TRUE	TRUE	FALSE
cg15845821	chr19	16830613	16830614	NWD1	284434	-172	Non-CGI	TRUE	FALSE	FALSE
cg04666029	chr11	2552843	2552844	KCNQ1	3784	86621	CGI-N-Shore	FALSE	TRUE	FALSE
cg15001056	chr3	151143464	151143465	IGSF10	285313	33031	Non-CGI	FALSE	TRUE	FALSE
cg13059495	chr1	3540478	3540479	TPRG1L	127262	-1076	CGI-N-Shore	TRUE	FALSE	FALSE
cg16725944	chr12	133215533	133215534	P2RX2	22953	20129	Non-CGI	FALSE	TRUE	FALSE
cg09464466	chr2	47500335	47500336	EPCAM	4072	-95950	CGI-S-Shore	FALSE	TRUE	FALSE
cg05713859	chr5	134240166	134240167	PCBD2	84105	-642	CGI-N-Shore	TRUE	FALSE	FALSE
cg19612068	chr6	33130024	33130025	COL11A2	1302	30219	CGI-S-Shore	FALSE	FALSE	TRUE
cg20249566	chr19	16830739	16830740	NWD1	284434	-46	Non-CGI	TRUE	FALSE	FALSE
cg10397932	chr1	2166155	2166156	SKI	6497	6020	CGI-S-Shelf	FALSE	TRUE	FALSE
cg07027613	chr12	7260608	7260609	C1RL-AS1	283314	-294	Non-CGI	TRUE	TRUE	FALSE
cg00842595	chr17	263193	263194	C17orf97	400566	3074	CGI	TRUE	TRUE	FALSE
cg00277397	chr7	71800412	71800413	CALN1	83698	111722	CGI-N-Shore	FALSE	TRUE	FALSE
cg12616487	chr11	62379063	62379064	ROM1	6094	-1148	CGI-N-Shore	TRUE	TRUE	FALSE
cg18822719	chr2	220035962	220035963	SLC23A3	151295	-1144	Non-CGI	TRUE	FALSE	FALSE
cg11442608	chr15	81456832	81456833	IL16	3603	-18259	Non-CGI	FALSE	FALSE	TRUE
cg20102280	chr13	47470793	47470794	HTR2A	3356	374	CGI-S-Shelf	FALSE	TRUE	FALSE
cg22060113	chr19	36422140	36422141	LRFN3	79414	-5880	CGI-N-Shore	FALSE	FALSE	TRUE
cg07508609	chr16	10838389	10838390	NUBP1	4682	690	CGI-S-Shore	FALSE	TRUE	FALSE
cg17848681	chr19	1244764	1244765	ATP5D	513	3014	CGI-S-Shore	FALSE	TRUE	FALSE
cg20439624	chr19	44010874	44010875	PHLDB3	653583	-1888	CGI-S-Shore	TRUE	TRUE	FALSE
cg10076902	chr11	1858135	1858136	TNNI2	7136	-2096	CGI	FALSE	TRUE	FALSE
cg23418219	chr7	28338684	28338685	CREB5	9586	-254	Non-CGI	TRUE	FALSE	FALSE
cg04890576	chr17	73032613	73032614	KCTD2	23510	3917	CGI-S-Shore	FALSE	TRUE	FALSE
cg00687714	chr16	21272887	21272888	ANKS4B	257629	27870	Non-CGI	FALSE	TRUE	FALSE
cg05584950	chr2	86012847	86012848	LOC284950	284950	-29404	Non-CGI	FALSE	TRUE	FALSE
cg16061228	chr11	118014547	118014548	SCN4B	6330	9081	CGI-N-Shore	FALSE	TRUE	FALSE
cg02457346	chr16	1825936	1825937	EME2	197342	2706	CGI-S-Shore	FALSE	TRUE	FALSE
cg15711508	chr1	193432241	193432242	B3GALT2	8707	-276497	Non-CGI	FALSE	FALSE	TRUE
cg04425624	chr6	31543565	31543566	TNF	7124	214	Non-CGI	TRUE	FALSE	FALSE
cg10713715	chr11	63533656	63533657	C11orf95	65998	2455	CGI-S-Shore	TRUE	TRUE	FALSE
cg22040301	chr11	2919798	2919799	SLC22A18	5002	-1151	CGI-N-Shelf	TRUE	TRUE	FALSE
cg02412346	chr7	1687852	1687853	TFAMP1	260341	33745	CGI-S-Shore	FALSE	FALSE	TRUE
cg13944685	chr11	71710643	71710644	IL18BP	10068	684	Non-CGI	TRUE	TRUE	FALSE
cg21858516	chr14	59103353	59103354	DACT1	51339	2566	CGI-N-Shore	TRUE	TRUE	FALSE
cg05369942	chr4	142228617	142228618	ZNF330	27309	86567	Non-CGI	FALSE	FALSE	TRUE
cg08022502	chr15	91479023	91479024	HDDC3	374659	-3248	CGI-S-Shore	FALSE	TRUE	FALSE
cg13001142	chr6	147528521	147528522	STXBP5-AS1	729178	-2770	CGI-S-Shelf	FALSE	TRUE	FALSE
cg06819923	chr16	21214508	21214509	ZP2	7783	8557	Non-CGI	FALSE	TRUE	FALSE
cg17105814	chr4	55365203	55365204	KIT	3815	-158890	Non-CGI	FALSE	FALSE	TRUE
cg09744397	chr15	102265293	102265294	TARSL2	123283	-647	CGI-S-Shore	TRUE	FALSE	FALSE
cg19654437	chr2	202671158	202671159	CDK15	65061	15980	Non-CGI	TRUE	TRUE	FALSE
cg04234016	chr12	7062109	7062110	PTPN6	5777	6368	Non-CGI	FALSE	TRUE	FALSE
cg00350448	chr11	72433866	72433867	PDE2A	5138	-48368	CGI-N-Shelf	TRUE	TRUE	FALSE
cg05098512	chr10	134861083	134861084	GPR123	84435	-23348	CGI	FALSE	FALSE	TRUE
cg01329789	chr2	219157515	219157516	TMBIM1	64114	-234	CGI-S-Shore	TRUE	TRUE	FALSE
cg18715243	chr8	37658755	37658756	GPR124	25960	4353	CGI-S-Shelf	FALSE	TRUE	FALSE
cg04908588	chr1	8229825	8229826	ERRFI1	54206	-143431	Non-CGI	FALSE	FALSE	TRUE
cg15304674	chr7	91923194	91923195	ANKIB1	54467	47645	Non-CGI	FALSE	TRUE	FALSE
cg24073777	chr1	10832698	10832699	CASZ1	54897	24007	Non-CGI	FALSE	TRUE	FALSE
cg06745001	chr19	49471563	49471564	FTL	2512	2996	CGI-N-Shore	FALSE	TRUE	FALSE
cg21152671	chr9	123690586	123690587	TRAF1	7185	863	CGI	TRUE	TRUE	FALSE
cg05817709	chr11	63304098	63304099	RARRES3	5920	-173	Non-CGI	TRUE	FALSE	FALSE
cg27367526	chr7	89841692	89841693	C7orf63	79846	-32794	CGI-S-Shore	TRUE	TRUE	FALSE
cg03615565	chr16	67572595	67572596	FAM65A	79567	9877	CGI	TRUE	TRUE	FALSE
cg20494635	chr11	2012071	2012072	MRPL23-AS1	100133545	-920	CGI-N-Shore	TRUE	FALSE	FALSE
cg05898618	chr11	2555576	2555577	KCNQ1	3784	89354	CGI	FALSE	TRUE	FALSE
cg04232972	chr16	30671644	30671645	FBRS	64319	400	CGI-S-Shore	TRUE	TRUE	FALSE
cg22864266	chr12	49319673	49319674	FKBP11	51303	-342	CGI-S-Shore	TRUE	FALSE	FALSE
cg09566302	chr16	30964627	30964628	SETD1A	9739	-3986	CGI-S-Shelf	FALSE	TRUE	FALSE
cg02724490	chr8	10488231	10488232	RP1L1	94137	24384	CGI-N-Shore	FALSE	TRUE	FALSE
cg10426318	chr6	30647588	30647589	DHX16	8449	-6757	CGI-S-Shore	FALSE	TRUE	FALSE
cg03553386	chr11	2170880	2170881	IGF2	3481	-46	Non-CGI	TRUE	TRUE	FALSE
cg09584785	chr1	162333354	162333355	C1orf111	284680	13288	CGI-N-Shelf	TRUE	TRUE	FALSE
cg04819580	chr7	150635526	150635527	KCNH2	3757	39874	Non-CGI	FALSE	FALSE	TRUE
cg14564815	chr5	139752588	139752589	SLC4A9	83697	12800	Non-CGI	FALSE	TRUE	FALSE
cg25793051	chr7	149439005	149439006	KRBA1	84626	26902	Non-CGI	FALSE	FALSE	TRUE
cg04354805	chr1	27152792	27152793	ZDHHC18	84243	-407	CGI-N-Shore	TRUE	TRUE	FALSE
cg14671809	chr3	55558213	55558214	WNT5A	7474	-36881	Non-CGI	FALSE	TRUE	FALSE
cg23175533	chr12	13196876	13196877	KIAA1467	57613	-437	CGI-N-Shore	TRUE	FALSE	FALSE
cg08471846	chr19	799621	799622	PTBP1	5725	2228	CGI-S-Shore	FALSE	TRUE	FALSE
cg04283926	chr1	42924245	42924246	PPCS	79717	2071	CGI-S-Shore	FALSE	TRUE	FALSE
cg19852660	chr11	2846681	2846682	KCNQ1DN	55539	-44580	CGI	FALSE	TRUE	FALSE
cg21674927	chr2	102644247	102644248	IL1R2	7850	35940	Non-CGI	FALSE	TRUE	FALSE
cg03025135	chr15	89632325	89632326	ABHD2	11057	943	CGI	FALSE	TRUE	FALSE
cg11145826	chr15	91477073	91477074	HDDC3	374659	-1298	CGI-S-Shore	TRUE	TRUE	FALSE
cg09164913	chr17	78963221	78963222	CHMP6	79643	-2418	CGI	FALSE	FALSE	TRUE
cg03181117	chr17	1543188	1543189	SCARF1	8578	5851	CGI-N-Shelf	FALSE	TRUE	FALSE
cg20133890	chr6	31680144	31680145	LY6G6E	79136	1696	Non-CGI	FALSE	TRUE	FALSE
cg21049809	chr14	91283462	91283463	TTC7B	145567	-700	CGI-S-Shore	TRUE	FALSE	FALSE
cg04105923	chr6	106451610	106451611	PRDM1	639	-82583	Non-CGI	FALSE	FALSE	TRUE
cg00081324	chr17	48201233	48201234	SAMD14	201191	5932	Non-CGI	FALSE	TRUE	FALSE
cg26140475	chr8	126525558	126525559	TRIB1	10221	82994	Non-CGI	FALSE	FALSE	TRUE
cg26963632	chr16	85558148	85558149	GSE1	23199	-86879	CGI-N-Shelf	FALSE	FALSE	TRUE
cg06084210	chr13	103754324	103754325	SLC10A2	6555	-35127	Non-CGI	FALSE	FALSE	TRUE
cg04544699	chr17	36833760	36833761	C17orf96	100170841	-2572	CGI-S-Shelf	FALSE	FALSE	TRUE
cg09064482	chr16	3081310	3081311	CCDC64B	146439	4230	CGI-S-Shore	TRUE	TRUE	FALSE
cg09308553	chr16	56763573	56763574	NUP93	9688	-442	CGI-N-Shore	TRUE	FALSE	FALSE
cg18725681	chr20	42940213	42940214	FITM2	128486	-323	CGI-S-Shore	TRUE	FALSE	FALSE
cg23389651	chr13	95327390	95327391	SOX21	11166	36997	Non-CGI	FALSE	FALSE	TRUE
cg02872426	chr6	110736772	110736773	DDO	8528	-18	Non-CGI	TRUE	FALSE	FALSE
cg01514353	chr22	46259643	46259644	MIR4762	100616253	103238	CGI-N-Shelf	FALSE	FALSE	TRUE
cg20094837	chr13	35515575	35515576	NBEA	26960	-847	CGI-N-Shore	TRUE	FALSE	FALSE
cg18212762	chr11	64556654	64556655	SF1	7536	-10337	Non-CGI	FALSE	TRUE	FALSE
cg04434593	chr11	67139546	67139547	CLCF1	23529	2100	CGI-N-Shore	FALSE	TRUE	FALSE
cg01807131	chr7	73856280	73856281	GTF2IRD1	9569	-11838	Non-CGI	FALSE	FALSE	TRUE
cg09304357	chr2	97220596	97220597	ARID5A	10865	18131	CGI	FALSE	FALSE	TRUE
cg14377791	chr19	40169912	40169913	LGALS17A	400696	-100	Non-CGI	TRUE	FALSE	FALSE
cg09539720	chr7	150885458	150885459	ASB10	136371	-538	Non-CGI	TRUE	FALSE	FALSE
cg05887421	chr15	35839041	35839042	ATPBD4	89978	-636	CGI-S-Shore	TRUE	TRUE	FALSE
cg15538427	chr11	62457014	62457015	LRRN4CL	221091	355	CGI-S-Shore	TRUE	FALSE	FALSE
cg09567725	chr16	85336621	85336622	LOC727710	727710	379	CGI	TRUE	FALSE	FALSE
cg08312355	chr17	37821536	37821537	TCAP	8557	-61	CGI-N-Shelf	TRUE	FALSE	FALSE
cg13055199	chr15	75136278	75136279	ULK3	25989	-725	CGI-S-Shore	TRUE	TRUE	FALSE
cg01910639	chr1	153507779	153507780	S100A6	6277	936	CGI-S-Shore	FALSE	TRUE	FALSE
cg04956949	chr7	73119262	73119263	MIR4284	100422948	-6383	CGI-S-Shore	FALSE	TRUE	FALSE
cg02008912	chr6	99790960	99790961	FAXC	84553	6569	Non-CGI	TRUE	TRUE	FALSE
ch.1.171672612F	chr1	173405989	173405991	LOC100506023	100506023	40302	Non-CGI	FALSE	TRUE	FALSE
cg21563471	chr2	158184535	158184536	ERMN	57471	-388	Non-CGI	TRUE	FALSE	FALSE
cg04284993	chr5	45038752	45038753	MRPS30	10884	229724	Non-CGI	FALSE	FALSE	TRUE
cg05344066	chr17	79285955	79285956	LINC00482	284185	-2906	Non-CGI	FALSE	TRUE	FALSE
cg16935597	chr17	76129099	76129100	TMC6	11322	-610	CGI-S-Shore	TRUE	TRUE	FALSE
cg05205351	chr20	2634775	2634776	SNORD110	692213	-81	CGI-S-Shore	TRUE	TRUE	FALSE
cg02298220	chr20	35914908	35914909	MANBAL	63905	-3141	CGI-N-Shelf	FALSE	FALSE	TRUE
cg08236479	chr16	78005126	78005127	CLEC3A	10143	-51315	Non-CGI	FALSE	TRUE	FALSE
cg24774812	chr14	63743552	63743553	GPHB5	122876	42039	Non-CGI	FALSE	TRUE	FALSE
cg26010412	chr14	47513774	47513775	RPL10L	140801	-392745	Non-CGI	FALSE	TRUE	FALSE
cg14507891	chr3	49208514	49208515	KLHDC8B	200942	-502	CGI-N-Shore	TRUE	FALSE	FALSE
cg00588614	chr10	43932900	43932901	ZNF487P	642819	325	CGI-S-Shore	FALSE	TRUE	FALSE
cg27175509	chr2	149891051	149891052	LYPD6B	130576	-3928	Non-CGI	FALSE	FALSE	TRUE
cg07234388	chr1	156261841	156261842	C1orf85	112770	3606	CGI-S-Shore	FALSE	TRUE	FALSE
cg20607293	chr1	147112703	147112704	ACP6	51205	29929	Non-CGI	FALSE	FALSE	TRUE
cg02006915	chr5	175991129	175991130	CDHR2	54825	21616	Non-CGI	TRUE	TRUE	FALSE
cg05595301	chr8	145028230	145028231	MIR661	724031	-8782	CGI	TRUE	TRUE	FALSE
cg21500064	chr20	46415859	46415860	SULF2	55959	-498	CGI-S-Shore	TRUE	FALSE	FALSE
cg09559780	chr16	50727221	50727222	NOD2	64127	-291	CGI	TRUE	FALSE	FALSE
cg00337440	chr8	27182122	27182123	PTK2B	2185	13122	CGI-N-Shore	TRUE	TRUE	FALSE
cg25865120	chr15	48625058	48625059	DUT	1854	1436	CGI-S-Shore	FALSE	TRUE	FALSE
cg10630880	chr3	52008682	52008683	ABHD14A-ACY1	100526760	-358	CGI	TRUE	TRUE	FALSE
cg15219685	chr6	111580120	111580121	KIAA1919	91749	-360	CGI-N-Shore	TRUE	FALSE	FALSE
cg00863306	chr19	13991470	13991471	NANOS3	342977	3406	CGI-S-Shore	FALSE	TRUE	FALSE
cg16193295	chr18	34338686	34338687	KIAA1328	57536	-70392	CGI-N-Shore	FALSE	TRUE	FALSE
cg06711175	chr5	55543927	55543928	ANKRD55	79722	-14740	Non-CGI	FALSE	FALSE	TRUE
cg25425705	chr3	123782393	123782394	KALRN	8997	29850	Non-CGI	FALSE	TRUE	FALSE
cg00129827	chr6	71394664	71394665	SMAP1	60682	17184	Non-CGI	FALSE	TRUE	FALSE
cg00229387	chr6	43445942	43445943	TJAP1	93643	680	CGI-S-Shore	TRUE	TRUE	FALSE
cg07843120	chr19	34856957	34856958	GPI	2821	1311	CGI-S-Shore	TRUE	TRUE	FALSE
cg22900075	chr17	55952563	55952564	MRPS23	51649	-25129	CGI-S-Shore	FALSE	TRUE	FALSE
cg10650821	chr6	31543686	31543687	TNF	7124	335	Non-CGI	TRUE	FALSE	FALSE
cg25968437	chr6	33819738	33819739	LOC100507584	100507584	44944	Non-CGI	FALSE	FALSE	TRUE
ch.1.159013533R	chr1	160746909	160746911	LY9	4063	-19016	Non-CGI	FALSE	FALSE	TRUE
cg14694075	chr17	36059830	36059831	HNF1B	6928	45264	Non-CGI	FALSE	TRUE	FALSE
cg12145394	chr5	177573275	177573276	NHP2	55651	7684	Non-CGI	FALSE	TRUE	FALSE
cg14979593	chr11	3830371	3830372	NUP98	4928	-11348	CGI-S-Shore	FALSE	TRUE	FALSE
cg21467614	chr6	31543638	31543639	TNF	7124	287	Non-CGI	TRUE	FALSE	FALSE
cg04330176	chr10	105619211	105619212	SH3PXD2A	9644	-4046	CGI-S-Shelf	FALSE	FALSE	TRUE
cg00020991	chr4	169930429	169930430	CBR4	84869	1037	CGI-N-Shore	FALSE	TRUE	FALSE
cg26226988	chr11	1037923	1037924	MUC6	4588	-1216	CGI-S-Shore	TRUE	FALSE	FALSE
cg08797423	chr16	66502262	66502263	BEAN1	146227	41061	Non-CGI	TRUE	TRUE	FALSE
cg18808904	chr20	11898851	11898852	BTBD3	22903	27373	Non-CGI	TRUE	TRUE	FALSE
cg00753748	chr3	134053141	134053142	AMOTL2	51421	41116	Non-CGI	FALSE	FALSE	TRUE
cg00521239	chr8	145015964	145015965	MIR661	724031	3481	CGI-N-Shore	FALSE	TRUE	FALSE
cg13630871	chr9	131583092	131583093	ENDOG	2021	2312	CGI-S-Shore	FALSE	TRUE	FALSE
cg04229059	chr16	58718971	58718972	SLC38A7	55238	-296	CGI-S-Shore	TRUE	FALSE	FALSE
cg11425788	chr1	60136100	60136101	MIR4711	100616409	62866	Non-CGI	FALSE	TRUE	FALSE
cg26815395	chr1	180485043	180485044	ACBD6	84320	-13020	Non-CGI	FALSE	FALSE	TRUE
cg02707357	chr8	28483997	28483998	EXTL3	2137	-75154	CGI-S-Shelf	FALSE	FALSE	TRUE
cg13683374	chr17	72364767	72364768	GPR142	350383	1121	CGI-N-Shelf	FALSE	TRUE	FALSE
cg22277154	chr13	31020468	31020469	LINC00426	100188949	-72431	CGI-S-Shore	FALSE	FALSE	TRUE
cg08301612	chr17	43228571	43228572	HEXIM1	10614	3886	CGI-S-Shore	TRUE	FALSE	FALSE
cg01102833	chr4	176986621	176986622	WDR17	116966	-362	CGI-N-Shore	TRUE	FALSE	FALSE
cg05304393	chr16	1545405	1545406	TELO2	9894	2052	CGI	FALSE	TRUE	FALSE
cg24535475	chr12	7167900	7167901	LPCAT3	10162	-42057	Non-CGI	TRUE	TRUE	FALSE
cg04793090	chr3	128903277	128903278	CNBP	7555	-466	CGI-S-Shore	TRUE	FALSE	FALSE
cg00314660	chr2	37312231	37312232	GPATCH11	253635	636	CGI-S-Shore	TRUE	TRUE	FALSE
cg15470658	chr12	57518141	57518142	LRP1	4035	-4139	CGI-N-Shelf	FALSE	TRUE	FALSE
cg24155190	chr1	201476619	201476620	CSRP1	1465	-231	CGI-S-Shore	TRUE	FALSE	FALSE
cg06473288	chr6	32820102	32820103	TAP1	6890	1644	CGI-N-Shore	TRUE	TRUE	FALSE
cg19998073	chr14	89078443	89078444	ZC3H14	79882	49189	Non-CGI	FALSE	TRUE	FALSE
cg27382910	chr10	129807539	129807540	PTPRE	5791	102213	CGI-N-Shelf	FALSE	TRUE	FALSE
cg18912541	chr14	69596496	69596497	DCAF5	8816	23416	Non-CGI	FALSE	TRUE	FALSE
cg05831242	chr16	834043	834044	MSLNL	401827	-1116	CGI-S-Shore	TRUE	FALSE	FALSE
cg26883033	chr10	80027004	80027005	LINC00856	100132987	18621	Non-CGI	TRUE	TRUE	FALSE
cg10144493	chr6	33395133	33395134	SYNGAP1	8831	7285	CGI-S-Shore	FALSE	TRUE	FALSE
cg03035167	chr2	201336269	201336270	KCTD18	130535	38521	Non-CGI	FALSE	TRUE	FALSE
cg21188652	chr2	219435559	219435560	RQCD1	9125	1880	CGI-S-Shore	FALSE	TRUE	FALSE
cg27187881	chr22	42466345	42466346	NAGA	4668	499	CGI-N-Shore	TRUE	FALSE	FALSE
cg03916277	chr1	3380250	3380251	ARHGEF16	27237	9102	CGI-S-Shore	FALSE	TRUE	FALSE
cg18635670	chr6	26539327	26539328	HMGN4	10473	754	CGI-S-Shore	FALSE	TRUE	FALSE
cg05207637	chr16	74134895	74134896	PSMD7	5713	-195776	Non-CGI	FALSE	FALSE	TRUE
cg26501049	chr6	119471177	119471178	FAM184A	79632	-818	Non-CGI	TRUE	FALSE	FALSE
cg18801806	chr11	118869385	118869386	CCDC84	338657	532	CGI-S-Shore	FALSE	TRUE	FALSE
cg07197831	chr2	27503157	27503158	TRIM54	57159	-2138	Non-CGI	FALSE	TRUE	FALSE
cg19784428	chr19	16830746	16830747	NWD1	284434	-39	Non-CGI	TRUE	FALSE	FALSE
cg23754392	chr10	22611454	22611455	BMI1	648	1314	CGI-S-Shore	FALSE	TRUE	FALSE
cg07715777	chr6	33128963	33128964	COL11A2	1302	31280	CGI-N-Shore	FALSE	FALSE	TRUE
cg19663246	chr7	32339095	32339096	PDE1C	5137	-711	CGI-S-Shore	TRUE	FALSE	FALSE
cg27211576	chr15	75093165	75093166	LMAN1L	79748	-11986	CGI-N-Shore	FALSE	TRUE	FALSE
cg07186576	chr10	31072771	31072772	LYZL2	119180	-154123	CGI-N-Shore	FALSE	FALSE	TRUE
cg00755588	chr9	139737793	139737794	C9orf172	389813	-1072	CGI-N-Shore	TRUE	FALSE	FALSE
cg21868031	chr1	207925112	207925113	CD46	4179	-269	CGI-N-Shore	TRUE	FALSE	FALSE
cg24590353	chr6	149295148	149295149	LOC100128176	100128176	-9327	Non-CGI	FALSE	TRUE	FALSE
cg05150327	chr15	81617335	81617336	STARD5	80765	-810	CGI-S-Shore	TRUE	FALSE	FALSE
cg13127741	chr20	31331821	31331822	COMMD7	149951	-6	CGI-S-Shore	TRUE	FALSE	FALSE
cg12261786	chr10	88727830	88727831	ADIRF	10974	-356	CGI-N-Shore	TRUE	TRUE	FALSE
cg25309041	chr5	131343261	131343262	ACSL6	23305	4607	CGI-N-Shelf	FALSE	TRUE	FALSE
cg01777397	chr2	29337946	29337947	CLIP4	79745	17374	CGI	TRUE	TRUE	FALSE
cg08310842	chr2	72156953	72156954	CYP26B1	56603	218008	Non-CGI	FALSE	FALSE	TRUE
cg12007048	chr11	1785701	1785702	MOB2	81532	-199	CGI	TRUE	FALSE	FALSE
cg00876127	chr16	56554313	56554314	BBS2	583	-304	CGI-S-Shore	TRUE	FALSE	FALSE
cg04052934	chr6	147179017	147179018	LOC729176	729176	-54056	Non-CGI	FALSE	TRUE	FALSE
cg02203656	chr7	23285761	23285762	GPNMB	10457	-553	CGI-N-Shore	TRUE	FALSE	FALSE
cg03982897	chr11	1990108	1990109	MRPL23-AS1	100133545	21040	CGI-S-Shore	FALSE	FALSE	TRUE
cg08248751	chr6	44043192	44043193	MRPL14	64928	51997	CGI-S-Shore	TRUE	FALSE	FALSE
cg08558886	chr2	151469837	151469838	RND3	390	-125627	Non-CGI	FALSE	FALSE	TRUE
cg02118562	chr3	124082907	124082908	KALRN	8997	330364	CGI-N-Shelf	FALSE	TRUE	FALSE
cg01055871	chr19	48216390	48216391	EHD2	30846	-209	CGI-N-Shore	TRUE	FALSE	FALSE
cg06532574	chr5	95295740	95295741	ELL2	22936	2033	CGI-N-Shore	FALSE	TRUE	FALSE
cg06602871	chr16	66466186	66466187	BEAN1	146227	4985	CGI-S-Shelf	FALSE	TRUE	FALSE
cg10646145	chr2	9235600	9235601	MBOAT2	129642	-91723	CGI-N-Shore	FALSE	FALSE	TRUE
cg11453058	chr19	14064176	14064177	PODNL1	79883	26	CGI-S-Shore	TRUE	TRUE	FALSE
cg03628800	chr10	129702726	129702727	PTPRE	5791	-2597	CGI-N-Shelf	FALSE	FALSE	TRUE
cg10244503	chr1	87691781	87691782	LMO4	8543	-102368	Non-CGI	FALSE	FALSE	TRUE
cg08164233	chr13	37394589	37394590	RFXAP	5994	1249	CGI-S-Shore	FALSE	TRUE	FALSE
cg13026773	chr15	80986359	80986360	FAM108C1	58489	-1291	CGI-N-Shore	TRUE	FALSE	FALSE
cg20170989	chr7	53102721	53102722	POM121L12	285877	-626	CGI-N-Shore	TRUE	FALSE	FALSE
cg24428232	chr1	166124419	166124420	MIR921	100126349	-383	Non-CGI	TRUE	TRUE	FALSE
cg06899799	chr12	56650233	56650234	ANKRD52	283373	1908	CGI-N-Shore	FALSE	TRUE	FALSE
cg03039990	chr14	101317622	101317623	MIR770	768222	-1103	Non-CGI	TRUE	TRUE	FALSE
cg23299618	chr11	45102239	45102240	PRDM11	56981	-13323	Non-CGI	FALSE	FALSE	TRUE
cg17835072	chr2	71189456	71189457	ANKRD53	79998	-16117	CGI-N-Shelf	FALSE	TRUE	FALSE
cg03132729	chr1	21947437	21947438	RAP1GAP	5909	48417	CGI-N-Shore	TRUE	TRUE	FALSE
cg10106965	chr3	10206258	10206259	IRAK2	3656	-303	CGI-N-Shore	TRUE	FALSE	FALSE
cg20973931	chr11	1785695	1785696	MOB2	81532	-193	CGI	TRUE	FALSE	FALSE
cg10731256	chr3	100054274	100054275	NIT2	56954	711	CGI-S-Shore	FALSE	TRUE	FALSE
cg08343644	chr16	57662060	57662061	GPR56	9289	8409	Non-CGI	TRUE	TRUE	FALSE
cg05131526	chr15	91447195	91447196	MAN2A2	4122	628	CGI-S-Shore	TRUE	TRUE	FALSE
cg12958020	chr5	149509394	149509395	CSF1R	1436	-16458	CGI	FALSE	TRUE	FALSE
cg16358099	chr10	95136834	95136835	MYOF	26509	105238	Non-CGI	FALSE	TRUE	FALSE
cg14355374	chr10	3850160	3850161	KLF6	1316	-22686	Non-CGI	FALSE	FALSE	TRUE
cg16109680	chr1	159161344	159161345	LOC100131825	100131825	10866	CGI-S-Shelf	FALSE	TRUE	FALSE
cg11826961	chr17	38221639	38221640	THRA	7067	3475	CGI-S-Shore	FALSE	TRUE	FALSE
cg26513304	chr5	169780916	169780917	KCNIP1	30820	34	Non-CGI	TRUE	FALSE	FALSE
cg07271580	chr4	159095085	159095086	FAM198B	51313	-882	CGI-S-Shelf	TRUE	TRUE	FALSE
cg04834097	chr7	63774078	63774079	ZNF736	728927	891	CGI-N-Shore	FALSE	TRUE	FALSE
cg13683194	chr9	104237697	104237698	TMEM246	84302	11776	Non-CGI	TRUE	TRUE	FALSE
ch.12.9379220R	chr12	9487953	9487955	LOC642846	642846	51699	Non-CGI	FALSE	FALSE	TRUE
cg03584351	chr7	1184214	1184215	C7orf50	84310	-6320	CGI-N-Shore	FALSE	FALSE	TRUE
cg10978034	chr6	33129988	33129989	COL11A2	1302	30255	CGI-S-Shore	FALSE	FALSE	TRUE
cg17784808	chr6	36410268	36410269	KCTD20	222658	-274	CGI-N-Shore	TRUE	TRUE	FALSE
cg27109461	chr7	101007603	101007604	COL26A1	136227	1480	CGI-S-Shore	FALSE	TRUE	FALSE
cg19141644	chr2	27601088	27601089	ZNF513	130557	2521	CGI-N-Shore	FALSE	TRUE	FALSE
cg21016699	chr5	131133566	131133567	RAPGEF6	51735	-809	CGI-S-Shore	TRUE	FALSE	FALSE
cg20664247	chr1	2345475	2345476	PEX10	5192	-1464	CGI-S-Shore	TRUE	FALSE	FALSE
cg04622454	chr9	140349128	140349129	NSMF	26012	4656	CGI-S-Shore	TRUE	TRUE	FALSE
cg04621728	chr2	234934131	234934132	SPP2	6694	-25213	CGI-S-Shore	FALSE	FALSE	TRUE
cg00563932	chr9	139871049	139871050	PTGDS	5730	1502	CGI-N-Shore	TRUE	TRUE	FALSE
cg01750895	chr17	17463041	17463042	PEMT	10400	31951	CGI-N-Shelf	FALSE	TRUE	FALSE
cg26886965	chr1	207672696	207672697	CR1	1378	3222	CGI-S-Shelf	FALSE	TRUE	FALSE
cg23654112	chr16	2525928	2525929	TBC1D24	57465	780	CGI	FALSE	TRUE	FALSE
cg26968812	chr19	16186873	16186874	TPM4	7171	8555	CGI	TRUE	TRUE	FALSE
cg05228408	chr1	11865352	11865353	MTHFR	4524	806	CGI-N-Shore	TRUE	TRUE	FALSE
ch.14.1488981R	chr14	93077342	93077344	RIN3	79890	97216	Non-CGI	FALSE	TRUE	FALSE
cg06211255	chr11	65153842	65153843	FRMD8	83786	-197	CGI	TRUE	FALSE	FALSE
cg11848931	chr10	25210092	25210093	PRTFDC1	56952	31439	Non-CGI	FALSE	TRUE	FALSE
cg23211736	chr1	59012820	59012821	OMA1	115209	-373	CGI-S-Shore	TRUE	FALSE	FALSE
cg20731257	chr2	87883497	87883498	MIR4435-1	100616499	-45775	CGI-N-Shore	FALSE	TRUE	FALSE
cg12834820	chr17	42852270	42852271	ADAM11	4185	15701	CGI-N-Shore	FALSE	TRUE	FALSE
cg12179661	chr9	140333805	140333806	ENTPD8	377841	2094	CGI-S-Shore	FALSE	TRUE	FALSE
cg06881421	chr2	67461943	67461944	LOC644838	644838	-19491	Non-CGI	FALSE	TRUE	FALSE
cg11073381	chr17	54305205	54305206	ANKFN1	162282	74368	Non-CGI	TRUE	TRUE	FALSE
cg02141748	chr20	3149470	3149471	PROSAPIP1	9762	4720	CGI-S-Shore	TRUE	TRUE	FALSE
cg26864395	chr1	25259106	25259107	RUNX3	864	32504	CGI	FALSE	TRUE	FALSE
cg13961400	chr6	31657548	31657549	LY6G5C	80741	-5730	Non-CGI	FALSE	TRUE	FALSE
cg18345924	chr21	22372231	22372232	NCAM2	4685	1597	CGI-S-Shore	FALSE	TRUE	FALSE
cg06861736	chr22	20918809	20918810	MED15	51586	56922	Non-CGI	TRUE	TRUE	FALSE
cg19413066	chr17	76965347	76965348	LGALS3BP	3959	10712	CGI-S-Shelf	FALSE	FALSE	TRUE
cg19101417	chr2	27504695	27504696	TRIM54	57159	-600	Non-CGI	TRUE	FALSE	FALSE
cg05261596	chr3	40220519	40220520	EIF1B	10289	-130652	Non-CGI	FALSE	TRUE	FALSE
cg02956355	chr16	81477864	81477865	CMIP	80790	-909	CGI	TRUE	FALSE	FALSE
cg17280134	chr17	8960047	8960048	NTN1	9423	35187	Non-CGI	FALSE	TRUE	FALSE
cg09357684	chr1	6684860	6684861	THAP3	90326	-63	CGI-N-Shore	TRUE	FALSE	FALSE
cg00653615	chr1	151029327	151029328	CDC42SE1	56882	2796	CGI-N-Shelf	FALSE	TRUE	FALSE
cg10613706	chr17	19355650	19355651	RNF112	7732	41158	Non-CGI	FALSE	FALSE	TRUE
cg13007871	chr6	30458519	30458520	HLA-E	3133	1335	CGI-S-Shore	FALSE	TRUE	FALSE
cg26801613	chr1	87793510	87793511	LMO4	8543	-639	CGI-N-Shore	TRUE	FALSE	FALSE
cg19811148	chr1	236273181	236273182	GPR137B	7107	-32649	CGI	FALSE	FALSE	TRUE
cg17864091	chr20	62200091	62200092	HELZ2	85441	5499	CGI	TRUE	TRUE	FALSE
cg09063663	chr1	16484811	16484812	EPHA2	1969	-2228	CGI-S-Shelf	FALSE	FALSE	TRUE
cg09054960	chr19	15590328	15590329	PGLYRP2	114770	-12	Non-CGI	TRUE	FALSE	FALSE
cg11143148	chr14	91283255	91283256	TTC7B	145567	-493	CGI-S-Shore	TRUE	FALSE	FALSE
cg26801943	chr2	74880862	74880863	SEMA4F	10505	-529	CGI-N-Shore	TRUE	FALSE	FALSE
cg01526854	chr6	41900498	41900499	BYSL	705	11532	Non-CGI	FALSE	TRUE	FALSE
cg02870946	chr18	77289084	77289085	NFATC1	4772	133311	CGI	FALSE	TRUE	FALSE
cg17329534	chr1	154980743	154980744	ZBTB7B	51043	5636	Non-CGI	TRUE	TRUE	FALSE
cg04709900	chr2	97220393	97220394	ARID5A	10865	17928	CGI	FALSE	FALSE	TRUE
cg00609948	chr5	141488100	141488101	NDFIP1	80762	-222	CGI	TRUE	FALSE	FALSE
cg20168514	chr1	171282607	171282608	FMO4	2329	-877	Non-CGI	TRUE	FALSE	FALSE
cg16705273	chr18	42262885	42262886	SETBP1	26040	2746	CGI-S-Shore	FALSE	TRUE	FALSE
ch.14.97331099F	chr14	98261346	98261348	LOC100129345	100129345	-108350	Non-CGI	FALSE	FALSE	TRUE
cg15925505	chr6	36854355	36854356	PPIL1	51645	-11554	CGI-S-Shore	FALSE	TRUE	FALSE
cg00214171	chr17	73642991	73642992	SMIM6	100130933	344	Non-CGI	TRUE	TRUE	FALSE
cg05147578	chr22	18559240	18559241	PEX26	55670	-1444	CGI-N-Shore	TRUE	FALSE	FALSE
cg03876085	chr21	46856099	46856100	COL18A1-AS1	378832	-11113	CGI-N-Shelf	FALSE	TRUE	FALSE
cg13605327	chr10	47057436	47057437	PPYR1	5540	-26096	Non-CGI	FALSE	TRUE	FALSE
cg23832497	chr6	121655383	121655384	C6orf170	221322	259	CGI-N-Shore	FALSE	TRUE	FALSE
cg20408175	chr12	53693169	53693170	C12orf10	60314	-299	CGI-N-Shore	TRUE	TRUE	FALSE
cg18389639	chr10	97049610	97049611	PDLIM1	9124	1169	CGI-N-Shore	FALSE	TRUE	FALSE
cg03172991	chr19	13105728	13105729	NFIX	4784	-854	CGI-N-Shore	TRUE	FALSE	FALSE
cg07437546	chr6	91096062	91096063	MIR4464	100616109	73600	Non-CGI	FALSE	FALSE	TRUE
cg06682024	chr2	112664134	112664135	MERTK	10461	7942	Non-CGI	FALSE	TRUE	FALSE
cg00661018	chr8	145769086	145769087	C8orf82	414919	-14627	CGI-N-Shore	FALSE	TRUE	FALSE
cg22871253	chr6	159238744	159238745	EZR	7430	1710	CGI-N-Shore	FALSE	TRUE	FALSE
cg08021945	chr12	9065639	9065640	PHC1	1911	-1675	CGI-N-Shore	TRUE	FALSE	FALSE
cg05571472	chr6	31802104	31802105	C6orf48	50854	-587	CGI-N-Shore	TRUE	FALSE	FALSE
cg08122899	chr3	49499574	49499575	DAG1	1605	-6560	Non-CGI	FALSE	FALSE	TRUE
cg27355006	chr16	30913234	30913235	CTF1	1489	5305	CGI-N-Shore	FALSE	TRUE	FALSE
cg23084416	chr10	80936005	80936006	ZMIZ1	57178	107212	Non-CGI	FALSE	TRUE	FALSE
cg16780603	chr2	169659047	169659048	NOSTRIN	115677	15997	Non-CGI	TRUE	TRUE	FALSE
cg09087961	chr7	23503778	23503779	IGF2BP3	10643	6215	CGI-N-Shelf	FALSE	TRUE	FALSE
cg03534662	chr3	45636225	45636226	LIMD1	8994	-96	CGI-S-Shore	TRUE	FALSE	FALSE
cg01254991	chr4	8163114	8163115	ABLIM2	84448	-2554	CGI-S-Shore	FALSE	FALSE	TRUE
cg08343101	chr11	44933332	44933333	TP53I11	9537	39506	Non-CGI	FALSE	TRUE	FALSE
cg17508639	chr1	20959617	20959618	PINK1	65018	-329	CGI-N-Shore	TRUE	FALSE	FALSE
cg23100720	chr6	155770386	155770387	NOX3	50508	6649	Non-CGI	FALSE	TRUE	FALSE
cg07954706	chr1	110164547	110164548	AMPD2	271	2420	CGI-S-Shore	FALSE	TRUE	FALSE
cg17661940	chr11	67168617	67168618	TBC1D10C	374403	-2767	CGI	FALSE	TRUE	FALSE
cg21886186	chr11	120106598	120106599	POU2F3	25833	-749	CGI-N-Shelf	TRUE	FALSE	FALSE
cg11594821	chr6	30458601	30458602	HLA-E	3133	1417	CGI-S-Shore	FALSE	TRUE	FALSE
cg09137533	chr22	46469091	46469092	MIR3619	100500828	-17831	CGI-S-Shore	FALSE	TRUE	FALSE
cg20010135	chr16	30996822	30996823	HSD3B7	80270	302	CGI-S-Shore	TRUE	TRUE	FALSE
cg21239940	chr8	68870412	68870413	PREX2	80243	5808	Non-CGI	FALSE	TRUE	FALSE
cg16402814	chr11	915227	915228	CHID1	66005	-168	CGI-S-Shelf	TRUE	FALSE	FALSE
cg04290427	chr5	137581267	137581268	GFRA3	2676	28984	CGI-S-Shelf	FALSE	FALSE	TRUE
cg08511485	chr3	168945731	168945732	MECOM	2122	435830	Non-CGI	FALSE	TRUE	FALSE
cg05697866	chr1	2437200	2437201	PANK4	55229	20833	CGI	FALSE	FALSE	TRUE
cg11619216	chr17	73642080	73642081	SMIM6	100130933	-564	Non-CGI	TRUE	TRUE	FALSE
cg19885306	chr6	44457781	44457782	MIR4642	100616352	54402	Non-CGI	FALSE	FALSE	TRUE
cg15640503	chr8	145181395	145181396	FAM203A	51236	-11275	CGI-S-Shore	FALSE	FALSE	TRUE
cg12797746	chr8	1110520	1110521	LOC286083	286083	140305	CGI	FALSE	FALSE	TRUE
cg06656924	chr6	35228319	35228320	ZNF76	7629	1632	CGI-S-Shore	FALSE	TRUE	FALSE
cg01620757	chr17	4635229	4635230	MED11	400569	505	CGI	FALSE	TRUE	FALSE
cg08157575	chr14	101660727	101660728	MIR656	724026	127665	Non-CGI	FALSE	FALSE	TRUE
cg11382203	chr11	76470635	76470636	TSKU	25987	-23648	Non-CGI	FALSE	FALSE	TRUE
cg26542792	chr12	52603567	52603568	LOC283403	283403	1070	Non-CGI	TRUE	TRUE	FALSE
cg02254885	chr8	11759665	11759666	CTSB	1508	-34018	CGI-N-Shore	FALSE	FALSE	TRUE
cg15393490	chr1	207996459	207996460	LOC148696	148696	4734	CGI-N-Shore	TRUE	FALSE	FALSE
cg12526474	chr7	140097579	140097580	SLC37A3	84255	730	CGI-N-Shore	FALSE	TRUE	FALSE
cg27467282	chr13	52116184	52116185	MIR4703	100616423	-10539	Non-CGI	FALSE	FALSE	TRUE
cg16431787	chr6	1082220	1082221	LOC285768	285768	19345	CGI-S-Shore	FALSE	TRUE	FALSE
cg17373345	chr8	66946188	66946189	DNAJC5B	85479	12396	Non-CGI	FALSE	TRUE	FALSE
cg20998539	chr17	62208374	62208375	ERN1	2081	-871	CGI-S-Shore	TRUE	FALSE	FALSE
cg14208102	chr3	48507165	48507166	TREX1	11277	5978	Non-CGI	TRUE	TRUE	FALSE
cg01185921	chr10	116444463	116444464	ABLIM1	3983	83554	Non-CGI	TRUE	TRUE	FALSE
cg04826368	chr6	27130208	27130209	MIR3143	100422934	14802	Non-CGI	FALSE	FALSE	TRUE
cg12315353	chr6	29573089	29573090	OR2H2	7932	17405	Non-CGI	FALSE	TRUE	FALSE
cg11004284	chr3	15470105	15470106	EAF1	85403	1040	CGI-S-Shore	TRUE	TRUE	FALSE
cg03972838	chr22	39897580	39897581	SMCR7L	54471	1474	CGI-N-Shore	TRUE	TRUE	FALSE
cg10052840	chr19	4558119	4558120	SEMA6B	10501	1650	CGI	FALSE	TRUE	FALSE
cg00465277	chr16	86121393	86121394	IRF8	3394	188618	CGI	FALSE	FALSE	TRUE
cg13798384	chr13	67636112	67636113	PCDH9	5101	168354	Non-CGI	FALSE	TRUE	FALSE
cg08541155	chr3	118994052	118994053	ARHGAP31	57514	-19166	Non-CGI	FALSE	FALSE	TRUE
cg00947744	chr22	50945565	50945566	LMF2	91289	568	CGI-S-Shore	TRUE	TRUE	FALSE
cg12502751	chr5	171726404	171726405	UBTD2	92181	-15608	CGI-S-Shelf	FALSE	FALSE	TRUE
cg01458484	chr6	30689681	30689682	TUBB	203068	1523	CGI-S-Shore	FALSE	TRUE	FALSE
cg00741333	chr6	43197675	43197676	DNPH1	10591	-463	CGI-S-Shore	TRUE	FALSE	FALSE
cg12688670	chr16	29801602	29801603	KIF22	3835	-454	CGI	TRUE	TRUE	FALSE
cg00984696	chr3	124128381	124128382	UMPS	7372	-320830	Non-CGI	FALSE	TRUE	FALSE
cg06002638	chr12	109592017	109592018	ACACB	32	37616	CGI-N-Shore	FALSE	TRUE	FALSE
cg15626285	chr12	7167781	7167782	LPCAT3	10162	-41938	Non-CGI	TRUE	TRUE	FALSE
cg00675878	chr22	23521267	23521268	BCR	613	-1283	CGI-N-Shore	TRUE	FALSE	FALSE
cg01588224	chr1	153950867	153950868	JTB	10899	-415	CGI-S-Shore	TRUE	FALSE	FALSE
cg19729744	chr3	194752020	194752021	XXYLT1	152002	239873	Non-CGI	FALSE	FALSE	TRUE
cg23202985	chr13	114048720	114048721	GRTP1	79774	-30256	CGI	FALSE	FALSE	TRUE
cg18328933	chr3	52008538	52008539	ABHD14A-ACY1	100526760	-502	CGI	TRUE	TRUE	FALSE
cg14522767	chr9	127616124	127616125	WDR38	401551	368	CGI-S-Shore	FALSE	TRUE	FALSE
cg20595453	chr6	33219392	33219393	HCG25	414765	2078	CGI-S-Shore	FALSE	TRUE	FALSE
cg09636313	chr16	89070025	89070026	CBFA2T3	863	-26520	CGI	FALSE	FALSE	TRUE
cg04573706	chr1	22216432	22216433	HSPG2	3339	47316	CGI-S-Shelf	FALSE	TRUE	FALSE
cg01511567	chr11	57103631	57103632	SSRP1	6749	-279	CGI-S-Shore	TRUE	FALSE	FALSE
cg25782440	chr19	7979022	7979023	TGFBR3L	100507588	-2008	CGI-S-Shore	FALSE	TRUE	FALSE
cg23006040	chr4	188528319	188528320	LOC339975	339975	-101551	Non-CGI	FALSE	FALSE	TRUE
cg25635916	chr3	50307037	50307038	SEMA3B	7869	1996	CGI-N-Shelf	TRUE	TRUE	FALSE
cg16736826	chr1	41951512	41951513	EDN2	1907	-1167	Non-CGI	TRUE	FALSE	FALSE
cg04028695	chr10	80008319	80008320	LINC00856	100132987	-61	CGI-N-Shore	TRUE	FALSE	FALSE
cg26058502	chr1	150946023	150946024	CERS2	29956	1454	CGI-N-Shore	FALSE	TRUE	FALSE
cg04772644	chr6	33165428	33165429	SLC39A7	7922	-3173	CGI-N-Shelf	TRUE	TRUE	FALSE
cg11521325	chr19	48808268	48808269	CCDC114	93233	16921	Non-CGI	TRUE	TRUE	FALSE
cg16888547	chr7	32339497	32339498	PDE1C	5137	-1113	CGI-S-Shore	TRUE	FALSE	FALSE
cg04861640	chr6	28234605	28234606	ZSCAN26	7741	-181	CGI-N-Shore	TRUE	FALSE	FALSE
cg02406092	chr19	39876337	39876338	PAF1	54623	5340	Non-CGI	FALSE	TRUE	FALSE
cg13641690	chr15	78114888	78114889	LOC645752	645752	104298	CGI-S-Shelf	FALSE	FALSE	TRUE
cg19236454	chr19	42799926	42799927	PRR19	284338	-6356	Non-CGI	FALSE	TRUE	FALSE
cg25644224	chr7	158195876	158195877	MIR595	693180	129627	CGI-N-Shelf	FALSE	TRUE	FALSE
cg12219789	chr17	7227499	7227500	GPS2	2874	-4971	CGI	FALSE	TRUE	FALSE
cg06911110	chr1	17293971	17293972	MFAP2	4237	14108	Non-CGI	TRUE	TRUE	FALSE
cg20688791	chr1	154415062	154415063	IL6R	3570	37392	Non-CGI	FALSE	TRUE	FALSE
cg05929069	chr2	120248984	120248985	SCTR	6344	33042	Non-CGI	FALSE	TRUE	FALSE
cg20107668	chr13	113624471	113624472	MCF2L-AS1	100289410	-1518	CGI-S-Shore	TRUE	TRUE	FALSE
cg20456243	chr2	220352476	220352477	GMPPA	29926	-11109	CGI-S-Shelf	FALSE	TRUE	FALSE
cg02538891	chr9	139549426	139549427	EGFL7	51162	-3880	CGI-S-Shore	FALSE	TRUE	FALSE
cg25027125	chr14	35182801	35182802	CFL2	1073	1226	CGI-N-Shore	FALSE	TRUE	FALSE
cg14398464	chr22	38082108	38082109	TRIOBP	11078	-234	CGI-N-Shore	TRUE	FALSE	FALSE
cg10822172	chr7	28338757	28338758	CREB5	9586	-181	Non-CGI	TRUE	FALSE	FALSE
cg00863378	chr16	56549757	56549758	BBS2	583	4249	CGI-N-Shelf	FALSE	TRUE	FALSE
cg02097792	chr11	2058046	2058047	H19	283120	-38980	Non-CGI	FALSE	FALSE	TRUE
cg11503396	chr2	25419761	25419762	POMC	5443	-28201	Non-CGI	FALSE	FALSE	TRUE
cg11947985	chr6	44119668	44119669	CAPN11	11131	-6878	CGI	FALSE	TRUE	FALSE
cg02241986	chr10	5566543	5566544	CALML3	810	-379	CGI-N-Shore	TRUE	FALSE	FALSE
cg00808969	chr11	77898785	77898786	KCTD21	283219	877	CGI-N-Shore	TRUE	TRUE	FALSE
cg04368843	chr20	3660815	3660816	ADAM33	80332	1921	CGI-N-Shore	FALSE	TRUE	FALSE
cg16881676	chr12	49659619	49659620	PRPH	5630	-29288	CGI-S-Shore	FALSE	TRUE	FALSE
cg08248579	chr6	17988937	17988938	KIF13A	63971	-1082	CGI	TRUE	FALSE	FALSE
cg09112476	chr2	232580215	232580216	MIR1244-1	100302285	2190	Non-CGI	FALSE	FALSE	TRUE
cg00689213	chr2	79366964	79366965	REG1P	5969	-1410	Non-CGI	TRUE	FALSE	FALSE
cg00390253	chr3	50241300	50241301	SLC38A3	10991	-1390	CGI-N-Shore	TRUE	FALSE	FALSE
cg13850871	chr9	139583773	139583774	AGPAT2	10555	-1861	CGI-S-Shore	TRUE	FALSE	FALSE
cg01806921	chr22	28011160	28011161	MN1	4330	186324	CGI-S-Shore	FALSE	FALSE	TRUE
cg17133388	chr3	122102727	122102728	FAM162A	26355	-294	CGI-S-Shore	TRUE	FALSE	FALSE
cg27035734	chr12	86230557	86230558	RASSF9	9182	-238	Non-CGI	TRUE	FALSE	FALSE
cg20710902	chr2	111440239	111440240	BUB1	699	-4554	CGI-S-Shelf	FALSE	FALSE	TRUE
cg13452386	chr11	67398435	67398436	NUDT8	254552	-1026	CGI	TRUE	FALSE	FALSE
cg27466129	chr16	85060822	85060823	KIAA0513	9764	-551	CGI-N-Shore	TRUE	FALSE	FALSE
cg04774505	chr14	24549943	24549944	CPNE6	9362	9896	CGI-N-Shore	FALSE	TRUE	FALSE
cg24711224	chr5	176561865	176561866	NSD1	64324	1784	CGI-S-Shore	TRUE	TRUE	FALSE
cg19625351	chr3	150808388	150808389	MED12L	116931	4936	CGI-S-Shelf	FALSE	TRUE	FALSE
cg14076390	chr17	34947837	34947838	DHRS11	79154	-387	CGI-N-Shore	TRUE	FALSE	FALSE
cg18343556	chr3	50316384	50316385	C3orf45	132228	-132	CGI-S-Shore	TRUE	FALSE	FALSE
cg02303505	chr8	91592157	91592158	TMEM64	169200	211700	Non-CGI	FALSE	FALSE	TRUE
cg04148285	chr16	89976788	89976789	MC1R	4157	-7497	CGI	FALSE	TRUE	FALSE
cg08815110	chr17	66291422	66291423	SLC16A6	9120	-4016	CGI-S-Shelf	FALSE	TRUE	FALSE
cg26023709	chr10	102745343	102745344	MRPL43	84545	1927	CGI-N-Shore	TRUE	TRUE	FALSE
cg18568061	chr17	40575822	40575823	PTRF	284119	-483	CGI-S-Shore	TRUE	FALSE	FALSE
cg04481603	chr10	104182930	104182931	PSD	5662	-3238	CGI-S-Shore	FALSE	FALSE	TRUE
cg06774893	chr16	68011109	68011110	DPEP3	64180	3341	CGI-N-Shelf	FALSE	TRUE	FALSE
cg01593969	chr14	23851239	23851240	CMTM5	116173	5221	Non-CGI	FALSE	TRUE	FALSE
cg11142617	chr1	2324205	2324206	RER1	11079	990	CGI	TRUE	TRUE	FALSE
cg01077178	chr10	22608674	22608675	BMI1	648	-1463	CGI-N-Shore	TRUE	TRUE	FALSE
cg01787559	chr4	3450770	3450771	HGFAC	3083	7043	CGI-S-Shore	FALSE	TRUE	FALSE
cg21810733	chr3	13520763	13520764	HDAC11	79885	-459	CGI-N-Shore	TRUE	FALSE	FALSE
cg10890346	chr11	2207660	2207661	MIR4686	100616126	13366	CGI-S-Shore	FALSE	FALSE	TRUE
cg08686462	chr11	2171184	2171185	IGF2	3481	-350	Non-CGI	TRUE	TRUE	FALSE
cg01791648	chr3	101232718	101232719	SENP7	57337	-632	CGI-S-Shore	TRUE	FALSE	FALSE
cg07056567	chr7	100273943	100273944	GNB2	2783	2579	CGI	TRUE	TRUE	FALSE
cg08737116	chr1	116563487	116563488	SLC22A15	55356	44367	Non-CGI	FALSE	TRUE	FALSE
cg01885635	chr3	40566085	40566086	ZNF621	285268	-289	CGI-N-Shore	TRUE	FALSE	FALSE
cg03147185	chr2	97008030	97008031	NCAPH	23397	6545	Non-CGI	FALSE	TRUE	FALSE
cg25722983	chr1	36840028	36840029	STK40	83931	11455	Non-CGI	FALSE	TRUE	FALSE
cg12866551	chr10	20019641	20019642	PLXDC2	84898	-85729	Non-CGI	FALSE	TRUE	FALSE
cg13770361	chr6	31621369	31621370	BAG6	7917	-891	CGI-S-Shore	TRUE	TRUE	FALSE
cg20152413	chr1	26494671	26494672	ZNF593	51042	-1715	CGI-N-Shore	TRUE	FALSE	FALSE
cg04812351	chr4	73177995	73177996	ADAMTS3	9508	256519	Non-CGI	TRUE	TRUE	FALSE
cg02553054	chr12	50478480	50478481	SMARCD1	6602	-501	CGI-N-Shore	TRUE	FALSE	FALSE
cg00957901	chr4	41614842	41614843	PHOX2B	8929	136143	Non-CGI	TRUE	TRUE	FALSE
cg14614881	chr9	116982494	116982495	MIR455	619556	10779	Non-CGI	FALSE	TRUE	FALSE
cg22571654	chr3	150805388	150805389	MED12L	116931	1936	CGI-S-Shore	FALSE	TRUE	FALSE
cg15094119	chr7	157670003	157670004	LOC100506585	100506585	22725	CGI	FALSE	TRUE	FALSE
cg04536704	chr6	32122966	32122967	LOC100507547	100507547	-823	CGI-S-Shore	TRUE	TRUE	FALSE
cg12774845	chr14	74486312	74486313	CCDC176	80127	252	CGI	TRUE	TRUE	FALSE
cg23694605	chr11	120044146	120044147	TRIM29	23650	-35282	CGI-S-Shelf	FALSE	FALSE	TRUE
cg15299997	chr2	234620463	234620464	UGT1A5	54579	-1173	Non-CGI	TRUE	TRUE	FALSE
cg20067719	chr17	48623772	48623773	SPATA20	64847	3352	CGI-N-Shore	TRUE	TRUE	FALSE
cg06073417	chr3	119316673	119316674	PLA1A	51365	-20	Non-CGI	TRUE	FALSE	FALSE
cg26365254	chr1	157952118	157952119	KIRREL	55243	-10943	CGI-S-Shelf	FALSE	FALSE	TRUE
cg04560098	chr6	30127760	30127761	TRIM10	10107	949	CGI-N-Shelf	FALSE	TRUE	FALSE
cg20324858	chr1	154529936	154529937	UBE2Q1	55585	1182	CGI-N-Shore	FALSE	TRUE	FALSE
cg06279471	chr11	67806118	67806119	TCIRG1	10312	-342	CGI-N-Shore	TRUE	FALSE	FALSE
cg24617352	chr20	2639164	2639165	SNORA51	677831	3450	Non-CGI	FALSE	TRUE	FALSE
cg13861180	chr9	140060268	140060269	MIR3621	100500811	3452	CGI-S-Shore	FALSE	TRUE	FALSE
cg02057239	chr16	67868085	67868086	THAP11	57215	-8126	CGI-S-Shore	TRUE	TRUE	FALSE
cg22325828	chr17	41018218	41018219	AOC4	90586	-942	Non-CGI	TRUE	FALSE	FALSE
cg02519286	chr12	6642354	6642355	GAPDH	2597	-1301	CGI-N-Shore	TRUE	FALSE	FALSE
cg06813554	chr14	23066769	23066770	ABHD4	63874	-376	CGI-N-Shore	TRUE	FALSE	FALSE
cg03428981	chr7	142551527	142551528	EPHB6	2051	-1263	CGI-N-Shore	TRUE	FALSE	FALSE
cg03990905	chr6	43265619	43265620	SLC22A7	10864	-377	Non-CGI	TRUE	FALSE	FALSE
cg19115017	chr11	15229502	15229503	INSC	387755	95531	Non-CGI	FALSE	TRUE	FALSE
cg14127659	chr22	38350784	38350785	C22orf23	84645	-1107	CGI-S-Shore	TRUE	TRUE	FALSE
cg26290219	chr6	33128906	33128907	COL11A2	1302	31337	CGI-N-Shore	FALSE	FALSE	TRUE
cg03316570	chr6	43877657	43877658	LOC100132354	100132354	18891	Non-CGI	FALSE	TRUE	FALSE
cg07202479	chr1	159174162	159174163	DARC	2532	358	Non-CGI	TRUE	FALSE	FALSE
cg07146073	chr17	29852668	29852669	MIR4724	100616248	-9231	CGI-N-Shelf	FALSE	TRUE	FALSE
cg02797271	chr14	105532159	105532160	GPR132	29933	-404	Non-CGI	TRUE	FALSE	FALSE
cg24517323	chr17	7227564	7227565	GPS2	2874	-5036	CGI	TRUE	TRUE	FALSE
cg00962740	chr1	243507532	243507533	MIR4677	100616343	-1944	Non-CGI	TRUE	TRUE	FALSE
cg01141413	chr4	1764152	1764153	FGFR3	2261	-30885	CGI-S-Shore	FALSE	FALSE	TRUE
cg04702509	chr17	17874183	17874184	TOM1L2	146691	1599	CGI-N-Shore	TRUE	TRUE	FALSE
cg16580935	chr6	33246149	33246150	B3GALT4	8705	1231	CGI-S-Shore	TRUE	FALSE	FALSE
cg22577701	chr6	30137629	30137630	TRIM15	89870	6645	CGI-N-Shelf	FALSE	TRUE	FALSE
cg06082883	chr16	89686744	89686745	DPEP1	1800	7027	CGI-N-Shore	TRUE	TRUE	FALSE
cg06174704	chr1	32821327	32821328	FAM229A	100128071	6515	CGI-S-Shelf	FALSE	FALSE	TRUE
cg20536364	chr5	55790102	55790103	ANKRD55	79722	-260915	Non-CGI	FALSE	FALSE	TRUE
cg25109663	chr3	114102785	114102786	ZBTB20-AS1	100131117	32126	Non-CGI	TRUE	TRUE	FALSE
cg18877361	chr14	105973846	105973847	C14orf80	283643	17653	CGI-N-Shore	FALSE	FALSE	TRUE
cg04597545	chr19	800229	800230	PTBP1	5725	2836	CGI-S-Shore	FALSE	TRUE	FALSE
cg13709487	chr3	100322493	100322494	GPR128	84873	-5938	Non-CGI	FALSE	FALSE	TRUE
cg15007228	chr1	2210335	2210336	SKI	6497	50200	CGI-S-Shore	FALSE	TRUE	FALSE
cg02025827	chr16	30996564	30996565	HSD3B7	80270	44	CGI-S-Shore	TRUE	FALSE	FALSE
cg11847992	chr5	95590917	95590918	MIR583	693168	176074	Non-CGI	FALSE	FALSE	TRUE
cg15616915	chr2	219266163	219266164	MIR26B	407017	-1204	CGI-S-Shore	TRUE	TRUE	FALSE
cg15501231	chr6	31737630	31737631	VWA7	80737	7476	CGI-S-Shelf	FALSE	TRUE	FALSE
cg01542019	chr19	14673053	14673054	NDUFB7	4713	9834	CGI-N-Shore	FALSE	TRUE	FALSE
cg04747824	chr6	168482714	168482715	FRMD1	79981	-2874	CGI	FALSE	FALSE	TRUE
cg16509239	chr11	62212431	62212432	SCGB1A1	7356	25923	CGI-S-Shore	FALSE	TRUE	FALSE
cg06800840	chr12	121476549	121476550	OASL	8638	229	Non-CGI	FALSE	TRUE	FALSE
cg19724470	chr9	5450936	5450937	CD274	29126	432	CGI-S-Shore	FALSE	TRUE	FALSE
cg00109344	chr9	116344532	116344533	RGS3	5998	137520	Non-CGI	TRUE	TRUE	FALSE
cg16664617	chr19	17607007	17607008	PGLS	25796	-15423	CGI-N-Shore	TRUE	TRUE	FALSE
cg01753375	chr2	74607600	74607601	DCTN1-AS1	100189589	-5243	Non-CGI	TRUE	TRUE	FALSE
cg17396222	chr7	134228596	134228597	AKR1B15	441282	-5251	Non-CGI	FALSE	FALSE	TRUE
cg18183701	chr1	203141724	203141725	MYBPH	4608	3216	Non-CGI	FALSE	TRUE	FALSE
cg00566320	chr1	32172204	32172205	COL16A1	1307	-2435	CGI-S-Shelf	FALSE	FALSE	TRUE
cg03395188	chr2	219266059	219266060	MIR26B	407017	-1308	CGI-S-Shore	TRUE	TRUE	FALSE
cg02550119	chr17	33306727	33306728	LIG3	3980	-788	CGI-N-Shore	TRUE	FALSE	FALSE
cg05656900	chr2	26235097	26235098	RAB10	10890	-21630	Non-CGI	FALSE	FALSE	TRUE
cg27589809	chr3	50650410	50650411	MAPKAPK3	7867	1116	CGI-S-Shore	TRUE	TRUE	FALSE
cg22136098	chr11	121297737	121297738	SORL1	6653	-25173	CGI-N-Shore	FALSE	FALSE	TRUE
cg08824384	chr6	143479386	143479387	AIG1	51390	98885	Non-CGI	FALSE	TRUE	FALSE
cg25985583	chr7	26404716	26404717	LOC441204	441204	-33621	Non-CGI	FALSE	TRUE	FALSE
cg27198696	chr6	31680112	31680113	LY6G6E	79136	1728	Non-CGI	FALSE	TRUE	FALSE
cg03772384	chr3	12851369	12851370	CAND2	23066	13197	CGI-N-Shore	FALSE	TRUE	FALSE
cg19991723	chr8	50020154	50020155	C8orf22	492307	35250	Non-CGI	FALSE	FALSE	TRUE
cg03726236	chr16	28935666	28935667	RABEP2	79874	864	CGI-N-Shore	FALSE	TRUE	FALSE
cg05265703	chr3	137787902	137787903	DZIP1L	199221	46547	Non-CGI	FALSE	TRUE	FALSE
cg27597853	chr2	150419026	150419027	MMADHC	27249	25302	Non-CGI	FALSE	FALSE	TRUE
cg15417149	chr11	64053742	64053743	BAD	572	-1565	CGI-S-Shore	TRUE	TRUE	FALSE
cg20801711	chr8	55278980	55278981	SOX17	64321	-91513	Non-CGI	FALSE	FALSE	TRUE
cg03572011	chr17	43229244	43229245	HEXIM1	10614	4559	CGI-S-Shore	TRUE	FALSE	FALSE
cg22007809	chr2	202278709	202278710	TRAK2	66008	37608	Non-CGI	FALSE	TRUE	FALSE
cg09633579	chr11	61395464	61395465	RPLP0P2	113157	12955	Non-CGI	FALSE	TRUE	FALSE
cg08587542	chr5	141303900	141303901	KIAA0141	9812	514	CGI-S-Shore	FALSE	TRUE	FALSE
cg18647570	chr17	41594616	41594617	ETV4	2118	29144	Non-CGI	FALSE	TRUE	FALSE
cg20176648	chr7	30951064	30951065	GHRHR	2692	-52570	CGI-N-Shore	TRUE	TRUE	FALSE
cg21692159	chr17	36898937	36898938	PCGF2	7703	5622	CGI-S-Shelf	FALSE	TRUE	FALSE
cg00309133	chr15	69452320	69452321	GLCE	26035	-651	CGI-N-Shore	TRUE	TRUE	FALSE
cg18420868	chr7	1519143	1519144	MICALL2	79778	-20033	CGI	FALSE	TRUE	FALSE
cg16463557	chr17	79296334	79296335	TMEM105	284186	8138	CGI-S-Shelf	FALSE	TRUE	FALSE
cg13800496	chr6	144901284	144901285	UTRN	7402	293793	Non-CGI	FALSE	TRUE	FALSE
cg24627299	chr7	116311496	116311497	MET	4233	-961	CGI-N-Shore	TRUE	FALSE	FALSE
cg14562086	chr17	48279265	48279266	COL1A1	1277	-264	CGI-S-Shore	TRUE	FALSE	FALSE
cg16358867	chr17	72306008	72306009	KIF19	124602	-16341	Non-CGI	TRUE	TRUE	FALSE
cg02301740	chr19	8804930	8804931	ACTL9	284382	4240	CGI-N-Shelf	FALSE	FALSE	TRUE
cg23496571	chr20	30644728	30644729	HCK	3055	4736	CGI-S-Shelf	FALSE	TRUE	FALSE
cg08096854	chr17	48617637	48617638	SPATA20	64847	-2780	CGI-N-Shore	FALSE	TRUE	FALSE
cg13625026	chr11	1146419	1146420	MUC5B	727897	-5159	Non-CGI	FALSE	FALSE	TRUE
cg19587434	chr17	48624143	48624144	SPATA20	64847	3723	CGI-N-Shore	TRUE	TRUE	FALSE
cg03627290	chr2	219155248	219155249	TMBIM1	64114	2030	CGI-N-Shore	FALSE	TRUE	FALSE
cg09419102	chr11	65550444	65550445	AP5B1	91056	-2621	CGI-S-Shore	FALSE	FALSE	TRUE
cg06224721	chr2	74612020	74612021	DCTN1-AS1	100189589	-823	Non-CGI	TRUE	TRUE	FALSE
cg06844864	chr12	57850192	57850193	INHBE	83729	1095	CGI-N-Shelf	FALSE	TRUE	FALSE
cg15711288	chr3	150500902	150500903	SIAH2	6478	-19638	CGI-S-Shelf	FALSE	FALSE	TRUE
cg25608626	chr11	117362843	117362844	CEP164	22897	170410	Non-CGI	FALSE	TRUE	FALSE
ch.2.105901354F	chr2	106534922	106534924	C2orf40	84417	-147188	Non-CGI	FALSE	FALSE	TRUE
cg01649334	chr3	101547296	101547297	NFKBIZ	64332	461	CGI-S-Shore	FALSE	TRUE	FALSE
cg05850205	chr8	67350187	67350188	ADHFE1	137872	5468	CGI-N-Shore	FALSE	TRUE	FALSE
cg10529555	chr1	205254523	205254524	NUAK2	81788	36358	Non-CGI	FALSE	FALSE	TRUE
cg03519967	chr1	26010346	26010347	MAN1C1	57134	66386	Non-CGI	FALSE	TRUE	FALSE
cg27333886	chr19	47713807	47713808	MIR3190	100422899	-16390	Non-CGI	FALSE	TRUE	FALSE
cg15743533	chr20	815345	815346	FAM110A	83541	988	CGI-S-Shore	TRUE	TRUE	FALSE
cg26134090	chr4	48909057	48909058	OCIAD2	132299	-241	CGI-S-Shore	TRUE	FALSE	FALSE
cg10381440	chr17	46622715	46622716	HOXB2	3212	-321	CGI-S-Shore	TRUE	FALSE	FALSE
cg12627948	chr7	49892292	49892293	VWC2	375567	79034	Non-CGI	FALSE	TRUE	FALSE
cg20481287	chr12	12224457	12224458	BCL2L14	79370	578	Non-CGI	TRUE	TRUE	FALSE
cg01420159	chr16	85335889	85335890	LOC727710	727710	1111	CGI-S-Shore	FALSE	TRUE	FALSE
cg20711030	chr7	150897624	150897625	ASB10	136371	-12704	CGI-N-Shelf	FALSE	FALSE	TRUE
cg02506717	chr7	28338790	28338791	CREB5	9586	-148	Non-CGI	TRUE	FALSE	FALSE
cg12096762	chr15	88296044	88296045	LINC00052	145978	175883	Non-CGI	FALSE	FALSE	TRUE
cg13708910	chr11	67183498	67183499	CARNS1	57571	348	CGI-S-Shore	TRUE	TRUE	FALSE
cg21107581	chr19	49258805	49258806	FGF21	26291	-9	CGI-S-Shore	TRUE	FALSE	FALSE
cg10891482	chr11	60467228	60467229	MS4A8B	83661	180	Non-CGI	TRUE	FALSE	FALSE
cg21787323	chr11	85338252	85338253	DLG2	1740	60	CGI-N-Shore	TRUE	TRUE	FALSE
cg05632420	chr7	130793732	130793733	FLJ43663	378805	919	CGI-S-Shore	TRUE	TRUE	FALSE
cg16323609	chr3	48885591	48885592	PRKAR2A	5576	-320	CGI-S-Shore	TRUE	FALSE	FALSE
cg01124546	chr11	117515332	117515333	DSCAML1	57453	172906	CGI	FALSE	TRUE	FALSE
cg09212118	chr1	42630526	42630527	GUCA2A	2980	-130	CGI-N-Shelf	TRUE	FALSE	FALSE
cg22032961	chr1	207152909	207152910	FCAMR	83953	-8938	Non-CGI	FALSE	FALSE	TRUE
cg04813787	chr6	167814397	167814398	TCP10	6953	-16398	CGI	FALSE	FALSE	TRUE
cg08237521	chr16	66360304	66360305	CDH5	1003	-40219	Non-CGI	FALSE	FALSE	TRUE
cg12036303	chr6	30652907	30652908	PPP1R18	170954	2763	CGI-N-Shore	TRUE	TRUE	FALSE
cg25349939	chr2	144855085	144855086	GTDC1	79712	234996	Non-CGI	FALSE	TRUE	FALSE
cg18468844	chr1	28503720	28503721	PTAFR	5724	16725	Non-CGI	TRUE	TRUE	FALSE
cg09516349	chr19	18529339	18529340	SSBP4	170463	-805	CGI-S-Shore	TRUE	FALSE	FALSE
cg02616368	chr8	143761680	143761681	PSCA	8000	9953	Non-CGI	TRUE	TRUE	FALSE
cg18143317	chr11	2037124	2037125	H19	283120	-18058	CGI	FALSE	FALSE	TRUE
cg08916374	chr1	145471727	145471728	ANKRD34A	284615	1218	CGI-S-Shore	TRUE	TRUE	FALSE
cg01765174	chr9	100880960	100880961	TRIM14	9830	526	CGI-N-Shore	FALSE	TRUE	FALSE
cg00113369	chr1	2977861	2977862	FLJ42875	440556	2487	CGI-N-Shore	FALSE	TRUE	FALSE
cg21534578	chr1	197745159	197745160	DENND1B	163486	-535	CGI-S-Shore	TRUE	FALSE	FALSE
cg12149299	chr12	96762309	96762310	CDK17	5128	32055	Non-CGI	FALSE	TRUE	FALSE
cg00244776	chr6	30883192	30883193	VARS2	57176	1603	CGI-S-Shore	TRUE	TRUE	FALSE
cg10336792	chr10	134115227	134115228	LRRC27	80313	-30385	CGI	FALSE	TRUE	FALSE
cg06800578	chr1	44683416	44683417	DMAP1	55929	4290	CGI-S-Shelf	FALSE	TRUE	FALSE
cg16154857	chr3	69249276	69249277	LMOD3	56203	-77529	Non-CGI	FALSE	TRUE	FALSE
cg13931228	chr7	24612418	24612419	MPP6	51678	-665	CGI-N-Shore	TRUE	FALSE	FALSE
cg10806318	chr11	70374297	70374298	CTTN	2017	129684	Non-CGI	FALSE	TRUE	FALSE
cg02088673	chr11	61490404	61490405	MYRF	745	-29715	Non-CGI	FALSE	TRUE	FALSE
cg23060384	chr3	194206773	194206774	FLJ34208	401106	-1094	CGI-N-Shore	TRUE	FALSE	FALSE
cg17804071	chr3	73596205	73596206	PDZRN3	23024	77865	Non-CGI	FALSE	TRUE	FALSE
cg13039082	chr11	77123331	77123332	PAK1	5058	61775	CGI-S-Shore	TRUE	TRUE	FALSE
cg25178749	chr21	46369906	46369907	FAM207A	85395	9950	CGI-S-Shore	FALSE	TRUE	FALSE
cg01128109	chr1	89989507	89989508	LRRC8B	23507	-888	CGI-N-Shore	TRUE	FALSE	FALSE
cg08057037	chr11	865673	865674	TSPAN4	7106	22848	CGI	FALSE	TRUE	FALSE
cg00659931	chr15	102010125	102010126	PCSK6	5046	20060	CGI-S-Shore	FALSE	TRUE	FALSE
cg08215811	chr5	139742900	139742901	SLC4A9	83697	3112	CGI-N-Shore	FALSE	TRUE	FALSE
cg11902408	chr3	14859299	14859300	FGD5	152273	-1168	CGI-N-Shelf	TRUE	FALSE	FALSE
cg15970259	chr11	8108498	8108499	TUB	7275	67706	Non-CGI	FALSE	TRUE	FALSE
cg04654716	chr5	74162924	74162925	FAM169A	26049	28862	CGI-S-Shore	TRUE	TRUE	FALSE
cg09360654	chr1	45806501	45806502	MUTYH	4595	-358	CGI-S-Shore	TRUE	TRUE	FALSE
cg13066481	chr3	123372199	123372200	MYLK-AS1	100506826	67795	Non-CGI	FALSE	TRUE	FALSE
cg11830800	chr12	41087520	41087521	CNTN1	1272	1161	CGI	FALSE	TRUE	FALSE
cg01256539	chr5	119802022	119802023	PRR16	51334	2002	CGI-S-Shore	FALSE	TRUE	FALSE
cg11748880	chr15	49438392	49438393	COPS2	9318	9460	Non-CGI	FALSE	TRUE	FALSE
cg01820962	chr6	116511817	116511818	TSPYL4	23270	63442	Non-CGI	FALSE	TRUE	FALSE
cg04001714	chr2	96015817	96015818	FAHD2A	51011	-52629	CGI-S-Shelf	FALSE	TRUE	FALSE
cg18470101	chr4	26032635	26032636	C4orf52	389203	116820	CGI-S-Shore	FALSE	FALSE	TRUE
cg11036041	chr4	41365307	41365308	LIMCH1	22998	2502	CGI-S-Shore	FALSE	TRUE	FALSE
cg14640772	chr5	188704	188705	LRRC14B	389257	-2920	CGI	FALSE	TRUE	FALSE
cg02485922	chr16	30379391	30379392	TBC1D10B	26000	2129	CGI-N-Shore	FALSE	TRUE	FALSE
cg15650298	chr8	144896694	144896695	SCRIB	23513	853	CGI-S-Shore	TRUE	TRUE	FALSE
cg25998745	chr8	142028625	142028626	PTK2	5747	-17212	Non-CGI	FALSE	FALSE	TRUE
cg20648272	chr20	35068341	35068342	MYL9	10398	-101554	CGI-S-Shelf	FALSE	TRUE	FALSE
cg10418289	chr14	23308294	23308295	MMP14	4323	2500	CGI-S-Shore	FALSE	TRUE	FALSE
cg00463859	chr1	23750101	23750102	TCEA3	6920	1158	CGI-N-Shore	FALSE	TRUE	FALSE
cg10257332	chr3	47869137	47869138	MIR1226	100302232	-21906	CGI-S-Shelf	FALSE	TRUE	FALSE
cg18669381	chr1	16539088	16539089	ARHGEF19	128272	14	CGI-N-Shelf	TRUE	FALSE	FALSE
cg01407062	chr15	91538575	91538576	PRC1	9055	-770	CGI-S-Shore	TRUE	FALSE	FALSE
cg19926902	chr11	118015584	118015585	SCN4B	6330	8044	CGI-N-Shore	FALSE	TRUE	FALSE
cg18569661	chr12	678853	678854	NINJ2	4815	93900	CGI-N-Shore	FALSE	TRUE	FALSE
cg17094065	chr12	53443584	53443585	TENC1	23371	2773	CGI-S-Shore	TRUE	TRUE	FALSE
cg16989340	chr1	1084147	1084148	LOC254099	254099	11749	CGI	FALSE	FALSE	TRUE
cg03155159	chr16	59627519	59627520	LOC644649	644649	161574	Non-CGI	FALSE	FALSE	TRUE
cg22103219	chr7	101934892	101934893	MIR4285	100422858	-1475	CGI-N-Shore	TRUE	TRUE	FALSE
cg11715474	chr2	119977813	119977814	STEAP3	55240	-3569	CGI-N-Shelf	FALSE	FALSE	TRUE
cg21333674	chr8	96705765	96705766	LOC100500773	100500773	254809	Non-CGI	FALSE	TRUE	FALSE
cg19873536	chr10	116475283	116475284	ABLIM1	3983	52734	Non-CGI	FALSE	TRUE	FALSE
cg26279183	chr14	75665683	75665684	TMED10	10972	-22333	Non-CGI	FALSE	FALSE	TRUE
cg03613618	chr8	97658325	97658326	CPQ	10404	825	CGI-S-Shore	FALSE	TRUE	FALSE
cg14018141	chr17	72480644	72480645	CD300A	11314	18121	Non-CGI	FALSE	TRUE	FALSE
cg00982136	chr2	201726139	201726140	CLK1	1195	3326	CGI-N-Shelf	TRUE	TRUE	FALSE
cg19494100	chr6	18387313	18387314	RNF144B	255488	-266	CGI-N-Shore	TRUE	FALSE	FALSE
cg12446246	chr1	208418552	208418553	PLXNA2	5362	-886	CGI-S-Shore	TRUE	FALSE	FALSE
cg26343116	chr5	172045960	172045961	NEURL1B	54492	-22314	CGI-S-Shore	FALSE	FALSE	TRUE
cg08646313	chr8	98058371	98058372	TSPYL5	85453	231803	CGI-S-Shore	FALSE	TRUE	FALSE
cg21064451	chr22	38071534	38071535	LGALS1	3956	-77	CGI-N-Shore	TRUE	FALSE	FALSE
cg05977992	chr6	151186411	151186412	MTHFD1L	25902	-402	CGI-N-Shore	TRUE	FALSE	FALSE
cg19038230	chr13	47126445	47126446	LRCH1	23143	-849	CGI	TRUE	FALSE	FALSE
cg26408600	chr14	24559812	24559813	PCK2	5106	-3669	CGI-N-Shelf	FALSE	TRUE	FALSE
cg06338550	chr7	29849414	29849415	WIPF3	644150	3243	CGI-S-Shelf	FALSE	TRUE	FALSE
cg00277714	chr13	30459305	30459306	UBL3	5412	-34484	Non-CGI	FALSE	FALSE	TRUE
cg25537245	chr17	56413890	56413891	MIR4736	100616220	-506	Non-CGI	TRUE	TRUE	FALSE
cg11253886	chr2	47039669	47039670	LOC388948	388948	-4136	Non-CGI	FALSE	FALSE	TRUE
cg21505886	chr4	1724428	1724429	TACC3	10460	1210	CGI-S-Shore	TRUE	TRUE	FALSE
cg07495470	chr22	43009195	43009196	POLDIP3	84271	1765	CGI-N-Shore	FALSE	TRUE	FALSE
cg06008062	chr11	73358518	73358519	PLEKHB1	58473	1294	Non-CGI	TRUE	TRUE	FALSE
cg01052701	chr12	132923430	132923431	GALNT9	50614	-17524	CGI	FALSE	FALSE	TRUE
cg23016600	chr1	247698186	247698187	OR2C3	81472	-1044	CGI-S-Shelf	TRUE	TRUE	FALSE
cg18529243	chr11	58911115	58911116	FAM111A	63901	796	CGI-S-Shore	TRUE	TRUE	FALSE
cg04462378	chr11	71749760	71749761	MIR3165	100422953	33586	Non-CGI	FALSE	TRUE	FALSE
cg04194821	chr14	34407432	34407433	EGLN3	112399	12850	Non-CGI	FALSE	TRUE	FALSE
cg02631189	chr1	113421910	113421911	AKR7A2P1	246182	-44060	Non-CGI	FALSE	FALSE	TRUE
cg10653131	chr13	24154260	24154261	TNFRSF19	55504	9750	CGI-S-Shore	FALSE	TRUE	FALSE
cg02727811	chr10	126736988	126736989	MIR4296	100423041	-15548	Non-CGI	FALSE	TRUE	FALSE
cg19248395	chr1	64660725	64660726	UBE2U	148581	-8763	Non-CGI	FALSE	FALSE	TRUE
cg11590282	chr11	2036771	2036772	H19	283120	-17705	CGI-N-Shore	FALSE	FALSE	TRUE
cg19038027	chr10	134306852	134306853	INPP5A	3632	-44499	CGI-S-Shelf	FALSE	FALSE	TRUE
cg05724065	chr7	56160528	56160529	PHKG1	5260	159	Non-CGI	TRUE	TRUE	FALSE
cg22878489	chr6	33245701	33245702	B3GALT4	8705	783	CGI	TRUE	FALSE	FALSE
cg08263205	chr1	175854934	175854935	SCARNA3	677679	82740	CGI-N-Shore	FALSE	FALSE	TRUE
cg00653847	chr10	102100212	102100213	SCD	6319	-6558	Non-CGI	FALSE	FALSE	TRUE
cg26283480	chr3	129252584	129252585	RHO	6010	5101	CGI-S-Shore	FALSE	TRUE	FALSE
cg01687189	chr12	102225365	102225366	GNPTAB	79158	-719	CGI-S-Shore	TRUE	FALSE	FALSE
cg01506917	chr6	42417086	42417087	TRERF1	55809	2777	CGI-N-Shelf	FALSE	TRUE	FALSE
cg23532322	chr17	79088325	79088326	MIR657	724027	10846	CGI-S-Shore	FALSE	TRUE	FALSE
cg14030836	chr1	2992620	2992621	PRDM16	63976	6877	CGI	FALSE	TRUE	FALSE
cg00252813	chr12	6642229	6642230	GAPDH	2597	-1426	CGI-N-Shore	TRUE	FALSE	FALSE
cg14986464	chr6	31669902	31669903	MIR4646	100616230	-1033	CGI-N-Shore	TRUE	TRUE	FALSE
cg05967487	chr11	65353416	65353417	EHBP1L1	254102	9906	CGI-S-Shore	FALSE	TRUE	FALSE
cg22385231	chr2	220119398	220119399	TUBA4A	7277	-67	CGI-S-Shore	TRUE	TRUE	FALSE
cg03818576	chr11	40312660	40312661	LRRC4C	57689	1168661	CGI-N-Shore	FALSE	TRUE	FALSE
cg17474524	chr20	62168831	62168832	PTK6	5753	-123	CGI	TRUE	FALSE	FALSE
cg11214532	chr17	79412137	79412138	MIR3186	100422944	6075	CGI-S-Shore	FALSE	TRUE	FALSE
cg06017697	chr16	89976667	89976668	MC1R	4157	-7618	CGI	FALSE	TRUE	FALSE
cg22943590	chr2	66648797	66648798	MEIS1	4211	-13733	CGI-N-Shelf	FALSE	FALSE	TRUE
cg14116509	chr17	48911410	48911411	WFIKKN2	124857	-599	CGI	TRUE	FALSE	FALSE
cg16709433	chr6	53832593	53832594	MLIP	90523	-51119	Non-CGI	FALSE	TRUE	FALSE
cg23490727	chr17	232332	232333	C17orf97	400566	-27784	CGI-S-Shore	FALSE	FALSE	TRUE
cg01127300	chr22	38614796	38614797	MAFF	23764	16856	CGI-S-Shelf	TRUE	FALSE	FALSE
cg19120897	chr18	5546794	5546795	EPB41L3	23136	83846	CGI-S-Shelf	FALSE	TRUE	FALSE
cg06196801	chr12	121164025	121164026	ACADS	35	453	CGI	FALSE	TRUE	FALSE
cg22360649	chr11	65657733	65657734	CCDC85B	11007	-140	CGI	TRUE	FALSE	FALSE
cg05303901	chr7	28338625	28338626	CREB5	9586	-313	Non-CGI	TRUE	FALSE	FALSE
cg15169121	chr2	177534417	177534418	LOC375295	375295	-32114	Non-CGI	FALSE	FALSE	TRUE
cg02944084	chr17	37827057	37827058	PNMT	5409	2549	CGI-S-Shelf	FALSE	FALSE	TRUE
cg01293143	chr20	62688326	62688327	TCEA2	6919	150	CGI-N-Shore	TRUE	TRUE	FALSE
cg15277914	chr3	154042611	154042612	DHX36	170506	-324	CGI-S-Shore	TRUE	FALSE	FALSE
cg06470727	chr2	26723062	26723063	OTOF	9381	58502	CGI-N-Shelf	FALSE	TRUE	FALSE
cg27450668	chr1	3460070	3460071	MIR551A	693135	17282	CGI	FALSE	TRUE	FALSE
cg19838043	chr14	104196038	104196039	ZFYVE21	79038	13956	CGI	TRUE	TRUE	FALSE
cg02148324	chr7	150925493	150925494	ABCF2	10061	-1175	CGI-S-Shore	TRUE	FALSE	FALSE
cg04098052	chr7	24517414	24517415	MPP6	51678	-95669	Non-CGI	FALSE	FALSE	TRUE
cg20797216	chr19	8212234	8212235	FBN3	84467	145	CGI-N-Shore	TRUE	FALSE	FALSE
cg17386185	chr3	52321266	52321267	GLYCTK	132158	-568	CGI-N-Shore	TRUE	FALSE	FALSE
cg16668176	chr19	5308893	5308894	PTPRS	5802	31919	CGI-S-Shore	FALSE	TRUE	FALSE
cg05835416	chr10	96442674	96442675	CYP2C18	1562	-575	Non-CGI	TRUE	FALSE	FALSE
cg18133072	chr1	28287782	28287783	XKR8	55113	1277	CGI-S-Shore	FALSE	TRUE	FALSE
cg13868393	chr17	75136249	75136250	SCARNA16	677781	50859	CGI-N-Shore	TRUE	TRUE	FALSE
cg24086068	chr4	77356008	77356009	SHROOM3	57619	-243	Non-CGI	TRUE	FALSE	FALSE
cg11896923	chr17	37825027	37825028	PNMT	5409	519	CGI-S-Shore	FALSE	TRUE	FALSE
cg08578520	chr16	57496324	57496325	POLR2C	5432	-225	CGI-N-Shore	TRUE	FALSE	FALSE
cg23444474	chr15	65718730	65718731	IGDCC4	57722	-3319	CGI-S-Shelf	FALSE	FALSE	TRUE
cg11678610	chr1	226313167	226313168	ACBD3	64746	61254	CGI-N-Shore	FALSE	FALSE	TRUE
cg20443357	chr10	134269240	134269241	C10orf91	170393	10525	CGI-S-Shore	FALSE	FALSE	TRUE
cg03131366	chr12	2041707	2041708	LOC100271702	100271702	4033	CGI	FALSE	TRUE	FALSE
cg07716032	chr17	7122846	7122847	DLG4	1742	521	CGI-N-Shore	TRUE	TRUE	FALSE
cg25150721	chr1	100826388	100826389	CDC14A	8556	15803	Non-CGI	FALSE	TRUE	FALSE
cg23913963	chr1	17766917	17766918	RCC2	55920	-666	CGI-S-Shore	TRUE	FALSE	FALSE
cg03851401	chr22	28200653	28200654	MN1	4330	-3166	CGI	FALSE	FALSE	TRUE
cg03239580	chr6	31973051	31973052	CYP21A2	1589	-306	CGI-N-Shelf	TRUE	FALSE	FALSE
cg20426710	chr22	50248907	50248908	ZBED4	9889	1409	CGI-S-Shore	FALSE	TRUE	FALSE
cg08683263	chr16	30078162	30078163	PPP4C	5531	-9186	CGI-S-Shore	FALSE	TRUE	FALSE
cg22776597	chr6	31802097	31802098	C6orf48	50854	-594	CGI-N-Shore	TRUE	FALSE	FALSE
cg09728487	chr4	141079462	141079463	MAML3	55534	-4228	CGI-S-Shelf	FALSE	FALSE	TRUE
cg04945945	chr17	76129402	76129403	TMC6	11322	-913	CGI-S-Shore	TRUE	TRUE	FALSE
cg08488756	chr21	45551018	45551019	C21orf33	8209	-2474	CGI-S-Shelf	FALSE	TRUE	FALSE
cg18268220	chr14	61492123	61492124	SLC38A6	145389	44290	Non-CGI	FALSE	TRUE	FALSE
cg02257517	chr9	136340262	136340263	SLC2A6	11182	4012	CGI-N-Shore	FALSE	TRUE	FALSE
cg10729062	chr19	14049823	14049824	DCAF15	90379	-13494	CGI-S-Shore	TRUE	TRUE	FALSE
cg23850277	chr22	24114770	24114771	MMP11	4320	-264	CGI-N-Shore	TRUE	FALSE	FALSE
cg01438090	chr11	30502936	30502937	MPPED2	744	104992	Non-CGI	FALSE	TRUE	FALSE
cg18147605	chr12	6663049	6663050	IFFO1	25900	2198	CGI-N-Shore	TRUE	TRUE	FALSE
cg14176088	chr1	9785289	9785290	C1orf200	644997	-70644	CGI-S-Shelf	FALSE	TRUE	FALSE
cg03149958	chr6	36326677	36326678	C6orf222	389384	-22014	Non-CGI	FALSE	TRUE	FALSE
cg03184011	chr20	39945503	39945504	ZHX3	23051	737	CGI-N-Shore	FALSE	TRUE	FALSE
cg16752583	chr7	142583731	142583732	TRPV6	55503	-240	Non-CGI	TRUE	FALSE	FALSE
cg02544257	chr16	70510663	70510664	FUK	197258	22164	Non-CGI	FALSE	TRUE	FALSE
cg23719877	chr7	128492916	128492917	ATP6V1F	9296	-9939	CGI-N-Shore	FALSE	TRUE	FALSE
cg06367459	chr19	55898325	55898326	RPL28	6158	1024	CGI-S-Shore	FALSE	TRUE	FALSE
cg04682133	chr1	55681841	55681842	LOC100507634	100507634	759	CGI	TRUE	FALSE	FALSE
cg09084200	chr11	134095863	134095864	VPS26B	112936	1301	CGI-S-Shore	TRUE	TRUE	FALSE
cg19518666	chr4	157692845	157692846	PDGFC	56034	199699	Non-CGI	FALSE	TRUE	FALSE
cg08128650	chr11	65426704	65426705	RELA	5970	3737	CGI-N-Shelf	FALSE	TRUE	FALSE
cg04503319	chr16	89368367	89368368	LOC100287036	100287036	-19172	CGI-N-Shelf	FALSE	TRUE	FALSE
cg23531488	chr7	123198305	123198306	NDUFA5	4698	-346	CGI-S-Shore	TRUE	FALSE	FALSE
cg09704401	chr2	64996998	64996999	SERTAD2	9792	-115951	CGI-S-Shore	FALSE	FALSE	TRUE
cg19234983	chr1	211688020	211688021	RD3	343035	-21760	CGI	FALSE	FALSE	TRUE
cg14203218	chr7	144107540	144107541	NOBOX	135935	-219	Non-CGI	TRUE	FALSE	FALSE
cg22361106	chr1	33909498	33909499	PHC2	1912	-12882	Non-CGI	FALSE	FALSE	TRUE
cg06239726	chr7	50517434	50517435	FIGNL1	63979	652	CGI-N-Shore	TRUE	TRUE	FALSE
cg10596434	chr5	171878353	171878354	SH3PXD2B	285590	3172	CGI-N-Shelf	FALSE	TRUE	FALSE
cg04049981	chr17	48894894	48894895	WFIKKN2	124857	-17115	Non-CGI	FALSE	FALSE	TRUE
cg00390694	chr20	62700725	62700726	RGS19	10287	10597	CGI-N-Shore	FALSE	TRUE	FALSE
cg01981760	chr16	53737576	53737577	RPGRIP1L	23322	193	CGI-N-Shore	TRUE	TRUE	FALSE
cg21758773	chr6	30458730	30458731	HLA-E	3133	1546	CGI-S-Shore	FALSE	TRUE	FALSE
cg18628483	chr12	57943326	57943327	KIF5A	3798	-519	CGI-N-Shore	TRUE	FALSE	FALSE
cg24761597	chr14	103984978	103984979	CKB	1152	4216	CGI-N-Shore	FALSE	FALSE	TRUE
cg00873351	chr17	72527813	72527814	CD300LB	124599	-199	Non-CGI	TRUE	FALSE	FALSE
cg25843346	chr6	31762555	31762556	VARS	7407	1155	CGI-N-Shore	FALSE	TRUE	FALSE
cg17010827	chr1	161141572	161141573	PPOX	5498	5390	Non-CGI	FALSE	TRUE	FALSE
cg13547237	chr11	65687877	65687878	DRAP1	10589	1148	CGI-S-Shore	TRUE	TRUE	FALSE
cg04326808	chr15	39543043	39543044	C15orf54	400360	157	Non-CGI	TRUE	FALSE	FALSE
cg02079584	chr15	74528719	74528720	CCDC33	80125	51	Non-CGI	TRUE	FALSE	FALSE
cg07478773	chr1	40041131	40041132	PABPC4	8761	1388	CGI-N-Shore	FALSE	TRUE	FALSE
cg24087613	chr4	129112470	129112471	PGRMC2	10424	97512	Non-CGI	FALSE	TRUE	FALSE
cg23495995	chr11	65311181	65311182	LTBP3	4054	15070	CGI-S-Shelf	FALSE	TRUE	FALSE
cg08247806	chr21	44596364	44596365	CRYAA	1409	7222	CGI-N-Shore	FALSE	FALSE	TRUE
cg15826479	chr17	78806493	78806494	CHMP6	79643	-159146	CGI-N-Shore	FALSE	TRUE	FALSE
cg13406746	chr11	615583	615584	IRF7	3665	414	CGI	TRUE	TRUE	FALSE
cg23901212	chr2	228632807	228632808	CCL20	6364	-45749	CGI	FALSE	FALSE	TRUE
cg09317239	chr10	21818060	21818061	SKIDA1	387640	-3448	CGI-S-Shore	FALSE	FALSE	TRUE
cg11439695	chr12	2561024	2561025	LOC283440	283440	319809	Non-CGI	FALSE	TRUE	FALSE
cg25389463	chr1	235325040	235325041	RBM34	23029	-267	CGI-S-Shore	TRUE	TRUE	FALSE
cg07073120	chr17	79994884	79994885	DCXR	51181	687	CGI	FALSE	TRUE	FALSE
cg00047050	chr11	107879431	107879432	CUL5	8065	22	CGI-N-Shore	TRUE	FALSE	FALSE
cg19052193	chr12	113660441	113660442	TPCN1	53373	1180	CGI-S-Shore	TRUE	TRUE	FALSE
cg11202634	chr8	37184569	37184570	ZNF703	80139	-368730	Non-CGI	FALSE	FALSE	TRUE
cg04035392	chr3	47866155	47866156	DHX30	22907	21755	CGI-N-Shore	TRUE	TRUE	FALSE
cg19098619	chr2	167193695	167193696	SCN9A	6335	38800	Non-CGI	FALSE	TRUE	FALSE
cg13951311	chr9	139499374	139499375	EGFL7	51162	-53932	CGI-S-Shelf	FALSE	FALSE	TRUE
cg01538166	chr17	17743987	17743988	SREBF1	6720	-3661	CGI-S-Shore	FALSE	FALSE	TRUE
cg06144110	chr16	85787176	85787177	C16orf74	404550	-2486	CGI-S-Shelf	FALSE	FALSE	TRUE
cg13153834	chr7	56142246	56142247	SUMF2	25870	10328	CGI	FALSE	TRUE	FALSE
cg07698783	chr11	47395915	47395916	SPI1	6688	4210	Non-CGI	FALSE	TRUE	FALSE
cg03100024	chr19	42571402	42571403	ZNF574	64763	-1225	Non-CGI	TRUE	FALSE	FALSE
cg27232482	chr1	159174001	159174002	DARC	2532	197	Non-CGI	TRUE	FALSE	FALSE
cg02438545	chr9	99380444	99380445	CDC14B	8555	1666	CGI-S-Shore	FALSE	TRUE	FALSE
cg09294739	chr16	55218782	55218783	IRX6	79190	-139687	Non-CGI	FALSE	FALSE	TRUE
cg00031105	chr6	33166117	33166118	SLC39A7	7922	-2484	CGI-N-Shore	TRUE	TRUE	FALSE
cg04873577	chr7	121006948	121006949	FAM3C	10447	29472	Non-CGI	FALSE	TRUE	FALSE
cg19577206	chr6	31866825	31866826	C2	717	1262	CGI-S-Shore	TRUE	TRUE	FALSE
cg03510486	chr12	53264540	53264541	KRT78	196374	-21761	CGI-N-Shelf	FALSE	FALSE	TRUE
cg08468689	chr17	40346680	40346681	GHDC	84514	-129	Non-CGI	TRUE	FALSE	FALSE
cg14994947	chr1	101448135	101448136	DPH5	51611	43507	Non-CGI	FALSE	FALSE	TRUE
cg01035771	chr14	100788625	100788626	SLC25A47	283600	-1052	CGI-S-Shelf	TRUE	FALSE	FALSE
cg08310088	chr16	28081556	28081557	GSG1L	146395	-6725	CGI-S-Shore	FALSE	FALSE	TRUE
cg25308086	chr1	2996020	2996021	PRDM16	63976	10277	CGI-S-Shore	FALSE	TRUE	FALSE
cg23408558	chr5	56679194	56679195	ACTBL2	345651	99440	Non-CGI	FALSE	FALSE	TRUE
cg12178431	chr3	14860764	14860765	FGD5	152273	294	CGI-N-Shore	TRUE	FALSE	FALSE
cg07465899	chr4	696400	696401	PCGF3	10336	-3171	CGI-N-Shore	FALSE	FALSE	TRUE
cg06824423	chr6	157505631	157505632	TMEM242	729515	239620	CGI	FALSE	TRUE	FALSE
cg21068013	chr3	43204254	43204255	GTDC2	84892	-56688	Non-CGI	FALSE	FALSE	TRUE
cg27512316	chr8	27516631	27516632	SCARA3	51435	25053	CGI	FALSE	TRUE	FALSE
cg17943663	chr17	74001963	74001964	CDK3	1018	4975	CGI-N-Shore	FALSE	TRUE	FALSE
cg01011757	chr2	233416425	233416426	EIF4E2	9470	1067	CGI-S-Shore	TRUE	TRUE	FALSE
cg13260758	chr22	19736671	19736672	TBX1	6899	-7553	Non-CGI	FALSE	FALSE	TRUE
cg09971549	chr16	89487322	89487323	ANKRD11	29123	69645	CGI-N-Shore	FALSE	TRUE	FALSE
cg13740709	chr3	128712555	128712556	KIAA1257	57501	429	CGI	TRUE	TRUE	FALSE
cg13607323	chr5	124526339	124526340	ZNF608	57507	-441838	Non-CGI	FALSE	FALSE	TRUE
cg22178392	chr5	150459690	150459691	TNIP1	10318	7529	CGI-N-Shore	FALSE	TRUE	FALSE
cg19159092	chr1	856059	856060	LOC100130417	100130417	-1241	CGI-S-Shore	TRUE	FALSE	FALSE
cg13455326	chr19	10043341	10043342	OLFM2	93145	3727	CGI-N-Shelf	FALSE	TRUE	FALSE
cg14977938	chr14	104190829	104190830	ZFYVE21	79038	8747	CGI	FALSE	TRUE	FALSE
cg19073171	chr7	154793806	154793807	PAXIP1	22976	874	CGI-N-Shore	TRUE	TRUE	FALSE
cg00237876	chr17	41924043	41924044	CD300LG	146894	-471	CGI-N-Shore	TRUE	FALSE	FALSE
cg21635307	chr6	90319877	90319878	LYRM2	57226	28595	Non-CGI	FALSE	TRUE	FALSE
cg07717512	chr6	31026287	31026288	HCG22	285834	4302	Non-CGI	TRUE	TRUE	FALSE
cg17617182	chr6	12279872	12279873	EDN1	1906	-10655	Non-CGI	FALSE	FALSE	TRUE
cg03394122	chr1	17307678	17307679	MFAP2	4237	401	CGI-S-Shore	TRUE	TRUE	FALSE
cg07131742	chr11	66112880	66112881	BRMS1	25855	-297	CGI-S-Shore	TRUE	TRUE	FALSE
cg17145190	chr19	13197029	13197030	LYL1	4066	16943	CGI-N-Shore	FALSE	TRUE	FALSE
cg01803844	chr17	8036816	8036817	HES7	84667	-9405	Non-CGI	FALSE	FALSE	TRUE
cg05684266	chr3	149825195	149825196	LOC646903	646903	136128	Non-CGI	FALSE	FALSE	TRUE
cg09138671	chr1	20125846	20125847	TMCO4	255104	910	CGI-N-Shore	TRUE	TRUE	FALSE
cg03579107	chr2	867791	867792	LOC339822	339822	-3678	CGI-S-Shore	FALSE	FALSE	TRUE
cg26025224	chr15	89020059	89020060	MRPS11	64963	9374	Non-CGI	FALSE	TRUE	FALSE
cg09260667	chr16	50679494	50679495	SNX20	124460	35768	Non-CGI	FALSE	FALSE	TRUE
cg11736544	chr17	42196657	42196658	HDAC5	10014	4355	CGI-N-Shelf	FALSE	TRUE	FALSE
cg27042278	chr14	91720527	91720528	GPR68	8111	-302	CGI-S-Shore	TRUE	FALSE	FALSE
cg05385331	chr1	41958055	41958056	EDN2	1907	-7710	CGI-N-Shelf	FALSE	FALSE	TRUE
cg15211996	chr1	2936768	2936769	ACTRT2	140625	-1276	CGI-N-Shore	TRUE	FALSE	FALSE
cg27430977	chr19	1826373	1826374	LOC100288123	100288123	4284	CGI-S-Shore	FALSE	TRUE	FALSE
cg04662594	chr8	21917015	21917016	EPB49	2039	5933	CGI-S-Shelf	FALSE	TRUE	FALSE
cg18444673	chr19	36389500	36389501	NFKBID	84807	2050	CGI-N-Shore	FALSE	TRUE	FALSE
cg03117611	chr12	125223679	125223680	SCARB1	949	124838	CGI	FALSE	FALSE	TRUE
cg19025497	chr5	138534324	138534325	SIL1	64374	-258	CGI-S-Shore	TRUE	FALSE	FALSE
cg13567205	chr9	137727338	137727339	MIR3689C	100616333	13875	CGI-S-Shore	FALSE	TRUE	FALSE
cg14772615	chr6	33116235	33116236	HLA-DPB2	3116	35941	Non-CGI	FALSE	FALSE	TRUE
cg27005906	chr12	6540162	6540163	CD27	939	-13887	Non-CGI	FALSE	FALSE	TRUE
cg04856022	chr6	32122955	32122956	LOC100507547	100507547	-812	CGI-S-Shore	TRUE	TRUE	FALSE
cg11601000	chr22	42348013	42348014	LINC00634	339674	-176	Non-CGI	TRUE	TRUE	FALSE
cg05408284	chr5	134240138	134240139	PCBD2	84105	-670	CGI-N-Shore	TRUE	FALSE	FALSE
cg00435064	chr17	76374256	76374257	PGS1	9489	-477	CGI-N-Shore	TRUE	FALSE	FALSE
cg14074626	chr1	63571356	63571357	LINC00466	199899	211543	Non-CGI	FALSE	FALSE	TRUE
cg02454476	chr15	68844912	68844913	CORO2B	10391	-26394	Non-CGI	FALSE	FALSE	TRUE
cg06741909	chr14	24767084	24767085	DHRS1	115817	1953	CGI-N-Shore	FALSE	TRUE	FALSE
cg13072214	chr8	145060799	145060800	PARP10	84875	-163	CGI-N-Shelf	TRUE	FALSE	FALSE
cg17886303	chr1	153656052	153656053	NPR1	4881	4887	CGI-S-Shelf	TRUE	TRUE	FALSE
cg23994468	chr19	56147306	56147307	ZNF581	51545	480	CGI-S-Shore	FALSE	TRUE	FALSE
cg25703567	chr6	52128822	52128823	IL17F	112744	-19523	Non-CGI	FALSE	TRUE	FALSE
cg24632873	chr3	50561368	50561369	CACNA2D2	9254	-20475	Non-CGI	FALSE	FALSE	TRUE
cg03433986	chr11	62477624	62477625	BSCL2	26580	-532	CGI-S-Shore	TRUE	TRUE	FALSE
cg20110707	chr11	118481992	118481993	PHLDB1	23187	4778	CGI-S-Shore	FALSE	TRUE	FALSE
cg16625218	chr8	30272502	30272503	RBPMS	11030	30557	Non-CGI	FALSE	TRUE	FALSE
cg23665568	chr1	85745053	85745054	BCL10	8915	-2465	CGI-S-Shelf	FALSE	TRUE	FALSE
cg19483007	chr3	149327651	149327652	WWTR1-AS1	100128025	-48344	Non-CGI	FALSE	TRUE	FALSE
cg05892419	chr17	29764719	29764720	RAB11FIP4	84440	46076	Non-CGI	FALSE	TRUE	FALSE
cg01119875	chr5	159737324	159737325	CCNJL	79616	29273	CGI-N-Shore	FALSE	TRUE	FALSE
cg01620309	chr17	42856469	42856470	ADAM11	4185	19900	CGI-N-Shore	FALSE	TRUE	FALSE
cg18050715	chr13	97996992	97996993	RAP2A	5911	-89481	CGI-N-Shore	FALSE	TRUE	FALSE
cg21719344	chr6	30647128	30647129	DHX16	8449	-6297	CGI-S-Shore	FALSE	TRUE	FALSE
cg04361926	chr16	89070185	89070186	CBFA2T3	863	-26680	CGI-S-Shore	FALSE	FALSE	TRUE
cg09570614	chr2	112124380	112124381	MIR4435-1	100616499	-45711	CGI	FALSE	TRUE	FALSE
cg10906826	chr2	240985618	240985619	OR6B3	150681	-128	CGI-S-Shore	TRUE	FALSE	FALSE
cg23460961	chr11	94382347	94382348	FUT4	2526	105329	Non-CGI	FALSE	FALSE	TRUE
cg21554217	chr5	138897467	138897468	TMEM173	340061	-35123	CGI	FALSE	FALSE	TRUE
cg11522612	chr6	31687637	31687638	LY6G6C	80740	1872	CGI-N-Shelf	FALSE	TRUE	FALSE
cg07633702	chr18	45612462	45612463	SMAD2	4087	-154946	Non-CGI	FALSE	TRUE	FALSE
cg19284368	chr8	37003666	37003667	KCNU1	157855	361823	Non-CGI	FALSE	FALSE	TRUE
cg09263904	chr12	58219817	58219818	MIR26A2	407016	-1341	Non-CGI	TRUE	TRUE	FALSE
cg22948288	chr17	41739246	41739247	MEOX1	4222	14	Non-CGI	TRUE	FALSE	FALSE
cg13805533	chr20	19674482	19674483	RIN2	54453	-192681	Non-CGI	FALSE	TRUE	FALSE
cg07037963	chr6	43265846	43265847	SLC22A7	10864	-150	Non-CGI	TRUE	FALSE	FALSE
cg12619504	chr5	179232533	179232534	SQSTM1	8878	-853	CGI-N-Shore	TRUE	TRUE	FALSE
cg06437922	chr1	226308360	226308361	H3F3AP4	440926	56681	CGI-N-Shore	FALSE	FALSE	TRUE
cg27057509	chr6	30883762	30883763	VARS2	57176	2173	CGI-S-Shore	FALSE	TRUE	FALSE
cg10806236	chr5	978405	978406	LOC100506688	100506688	19048	CGI-N-Shore	FALSE	FALSE	TRUE
cg14730524	chr11	92617118	92617119	MTNR1B	4544	-85669	CGI-S-Shore	FALSE	TRUE	FALSE
cg19697725	chr17	8198295	8198296	SLC25A35	399512	-124	CGI-N-Shore	TRUE	FALSE	FALSE
cg01104208	chr14	103566172	103566173	EXOC3L4	91828	-307	CGI-N-Shelf	TRUE	FALSE	FALSE
cg04959790	chr11	47278977	47278978	ACP2	53	-8519	Non-CGI	TRUE	TRUE	FALSE
cg22759096	chr6	30594296	30594297	ATAT1	79969	-315	CGI-N-Shore	TRUE	FALSE	FALSE
cg14341254	chr9	136499189	136499190	DBH	1621	-2294	Non-CGI	FALSE	FALSE	TRUE
cg00340855	chr6	30458586	30458587	HLA-E	3133	1402	CGI-S-Shore	FALSE	TRUE	FALSE
cg05814654	chr16	27413177	27413178	IL21R	50615	-304	Non-CGI	TRUE	FALSE	FALSE
cg00695799	chr6	149803087	149803088	ZC3H12D	340152	3059	CGI	FALSE	TRUE	FALSE
cg08872742	chr16	66400320	66400321	CDH5	1003	-203	Non-CGI	TRUE	FALSE	FALSE
cg00174179	chr3	49450293	49450294	TCTA	6988	653	CGI-S-Shore	TRUE	TRUE	FALSE
cg06819357	chr14	102928437	102928438	ANKRD9	122416	47689	Non-CGI	FALSE	TRUE	FALSE
cg00455467	chr2	131593162	131593163	ARHGEF4	50649	-79622	CGI-N-Shore	TRUE	TRUE	FALSE
cg05599106	chr19	12251511	12251512	ZNF20	7568	-288	CGI-S-Shore	TRUE	TRUE	FALSE
cg13385220	chr1	202250453	202250454	UBE2T	29089	60639	Non-CGI	FALSE	TRUE	FALSE
cg06750564	chr7	139637446	139637447	PARP12	64761	126073	Non-CGI	FALSE	TRUE	FALSE
cg22325673	chr4	6377625	6377626	WFS1	7466	106047	CGI-N-Shelf	FALSE	TRUE	FALSE
cg16637224	chr2	130538947	130538948	LOC389033	389033	152941	Non-CGI	FALSE	FALSE	TRUE
cg06631625	chr14	95656945	95656946	DICER1	23405	-32597	CGI-N-Shelf	FALSE	TRUE	FALSE
cg25974380	chr14	105973925	105973926	C14orf80	283643	17732	CGI	FALSE	FALSE	TRUE
cg26429636	chr7	99573747	99573748	AZGP1	563	-11	Non-CGI	TRUE	FALSE	FALSE
cg13252206	chr8	16970768	16970769	ZDHHC2	51201	-43066	Non-CGI	FALSE	TRUE	FALSE
cg18042043	chr19	44147545	44147546	CADM4	199731	-3553	CGI-S-Shelf	FALSE	FALSE	TRUE
cg06207201	chr16	50701535	50701536	SNX20	124460	13727	CGI-S-Shelf	TRUE	TRUE	FALSE
cg15081128	chr6	33133752	33133753	COL11A2	1302	26491	Non-CGI	FALSE	TRUE	FALSE
cg07949217	chr9	124497981	124497982	DAB2IP	153090	168581	CGI-N-Shore	FALSE	TRUE	FALSE
cg26211349	chr17	77404555	77404556	RBFOX3	146713	74123	Non-CGI	FALSE	TRUE	FALSE
cg12856708	chr17	43442340	43442341	MAP3K14	9020	-47925	Non-CGI	FALSE	FALSE	TRUE
cg21161526	chr9	123691672	123691673	TRAF1	7185	-220	CGI	TRUE	FALSE	FALSE
cg06617876	chr9	139652874	139652875	LCN8	138307	-142	CGI-S-Shore	TRUE	FALSE	FALSE
cg25254170	chr6	36954695	36954696	MTCH1	23787	-745	CGI-S-Shore	TRUE	FALSE	FALSE
cg02540736	chr14	100774063	100774064	MIR345	442910	-131	CGI-S-Shore	TRUE	FALSE	FALSE
cg17129262	chr6	41617803	41617804	MDFI	4188	11607	CGI-N-Shelf	FALSE	TRUE	FALSE
cg00238349	chr3	52187791	52187792	POC1A	25886	913	CGI-N-Shore	FALSE	TRUE	FALSE
cg16219535	chr14	50054412	50054413	RPS29	6235	-1317	CGI-S-Shore	TRUE	TRUE	FALSE
cg23190089	chr11	2920209	2920210	SLC22A18	5002	-740	CGI-N-Shelf	TRUE	TRUE	FALSE
cg24195878	chr19	18221573	18221574	IL12RB1	3594	-11946	CGI-S-Shore	FALSE	TRUE	FALSE
cg17151621	chr3	186330067	186330068	AHSG	197	-781	Non-CGI	TRUE	FALSE	FALSE
cg05210615	chr17	47512894	47512895	PHB	5245	-20651	Non-CGI	FALSE	FALSE	TRUE
cg06578111	chr3	13546418	13546419	HDAC11	79885	25193	Non-CGI	FALSE	TRUE	FALSE
cg07979752	chr11	107879401	107879402	CUL5	8065	-5	CGI-N-Shore	TRUE	FALSE	FALSE
cg21322248	chr15	77289047	77289048	PSTPIP1	9051	2025	Non-CGI	FALSE	TRUE	FALSE
cg01020263	chr16	50732073	50732074	NOD2	64127	4558	Non-CGI	FALSE	TRUE	FALSE
cg01023751	chr19	36427010	36427011	LRFN3	79414	-1010	CGI-N-Shore	TRUE	FALSE	FALSE
cg22391205	chr21	47458587	47458588	COL6A1	1291	56923	CGI	FALSE	FALSE	TRUE
cg08217285	chr17	27917879	27917880	ANKRD13B	124930	1077	CGI-S-Shore	TRUE	TRUE	FALSE
cg02494066	chr1	983386	983387	RNF223	401934	26299	CGI	FALSE	TRUE	FALSE
cg04405704	chr6	31369119	31369120	MICA	100507436	1557	CGI-S-Shore	FALSE	TRUE	FALSE
cg05347914	chr17	38521067	38521068	GJD3	125111	-121	CGI-S-Shore	TRUE	TRUE	FALSE
cg09361748	chr7	71682306	71682307	CALN1	83698	229828	Non-CGI	FALSE	TRUE	FALSE
cg00657460	chr18	52901961	52901962	MIR4529	100616290	-244489	Non-CGI	FALSE	TRUE	FALSE
cg03247262	chr17	38689571	38689572	TNS4	84951	-31716	Non-CGI	FALSE	FALSE	TRUE
cg26140749	chr8	143821266	143821267	SLURP1	57152	2561	CGI	FALSE	FALSE	TRUE
cg26734350	chr16	57662008	57662009	GPR56	9289	8357	Non-CGI	TRUE	TRUE	FALSE
cg17324128	chr10	45455500	45455501	RASSF4	83937	280	CGI-S-Shore	TRUE	TRUE	FALSE
cg17280514	chr2	242755302	242755303	NEU4	129807	5141	CGI-S-Shore	FALSE	TRUE	FALSE
cg09278098	chr12	84902512	84902513	SLC6A15	55117	404092	Non-CGI	FALSE	FALSE	TRUE
cg17033287	chr1	3056542	3056543	MIR4251	100422968	12002	CGI	FALSE	TRUE	FALSE
cg15442678	chr3	79065762	79065763	ROBO1	6091	751295	CGI-N-Shore	FALSE	TRUE	FALSE
cg15370536	chr17	38232128	38232129	THRA	7067	13964	Non-CGI	FALSE	TRUE	FALSE
cg24411972	chr10	134754396	134754397	NA	255352	1691	CGI	FALSE	TRUE	FALSE
cg06530443	chr1	45975796	45975797	MMACHC	25974	9939	Non-CGI	FALSE	TRUE	FALSE
cg01414357	chr19	48282728	48282729	SEPW1	6415	885	CGI-S-Shore	FALSE	TRUE	FALSE
cg03303515	chr2	47213998	47213999	MCFD2	90411	-45003	Non-CGI	FALSE	TRUE	FALSE
cg06712204	chr16	85542816	85542817	GSE1	23199	-102211	CGI	FALSE	FALSE	TRUE
cg13149736	chr2	149894539	149894540	LYPD6B	130576	-440	CGI-N-Shore	TRUE	FALSE	FALSE
cg00392257	chr1	156696747	156696748	ISG20L2	81875	1462	CGI-N-Shore	TRUE	TRUE	FALSE
cg16971991	chr11	1146470	1146471	MUC5B	727897	-5108	Non-CGI	FALSE	FALSE	TRUE
cg08313406	chr19	42415303	42415304	ARHGEF1	9138	28035	CGI-N-Shore	FALSE	TRUE	FALSE
cg01730666	chr17	41924302	41924303	CD300LG	146894	-212	CGI-N-Shore	TRUE	FALSE	FALSE
cg02639359	chr19	17862017	17862018	FCHO1	23149	3489	CGI-S-Shelf	TRUE	TRUE	FALSE
cg04521765	chr10	100028929	100028930	LOXL4	84171	-921	CGI-S-Shore	TRUE	FALSE	FALSE
cg21186098	chr8	108208344	108208345	ANGPT1	284	301908	Non-CGI	FALSE	FALSE	TRUE
cg04529679	chr5	34486568	34486569	RAI14	26064	-169863	Non-CGI	FALSE	FALSE	TRUE
cg11237573	chr1	32574586	32574587	KPNA6	23633	941	CGI-S-Shore	FALSE	TRUE	FALSE
cg06965409	chr16	1611973	1611974	TMEM204	79652	33230	CGI	FALSE	TRUE	FALSE
cg14532894	chr9	130964918	130964919	DNM1	1759	-743	CGI-N-Shore	TRUE	TRUE	FALSE
cg02478589	chr5	139082468	139082469	CXXC5	51523	54166	Non-CGI	FALSE	FALSE	TRUE
cg09558425	chr10	30073283	30073284	SVIL	6840	-47418	Non-CGI	FALSE	FALSE	TRUE
cg10189135	chr16	67516162	67516163	ATP6V0D1	9114	-1072	CGI	TRUE	FALSE	FALSE
cg06540876	chr6	31870600	31870601	ZBTB12	221527	-830	CGI	TRUE	TRUE	FALSE
cg25567054	chr14	104824020	104824021	KIF26A	26153	218959	CGI	FALSE	FALSE	TRUE
cg03008815	chr14	75372636	75372637	RPS6KL1	83694	17320	Non-CGI	FALSE	TRUE	FALSE
cg27428520	chr1	204100192	204100193	ETNK2	55224	21113	Non-CGI	FALSE	TRUE	FALSE
cg02399048	chr8	22000318	22000319	REEP4	80346	-869	CGI-S-Shore	TRUE	FALSE	FALSE
cg17034109	chr1	110036417	110036418	CYB561D1	284613	-239	CGI-N-Shore	TRUE	FALSE	FALSE
cg26856578	chr13	79360870	79360871	RNF219	79596	-126169	Non-CGI	FALSE	FALSE	TRUE
cg06401614	chr11	44927976	44927977	TP53I11	9537	44862	Non-CGI	TRUE	TRUE	FALSE
cg16209444	chr3	58522771	58522772	ACOX2	8309	156	Non-CGI	FALSE	TRUE	FALSE
cg22366909	chr6	30565190	30565191	MIR877	100126314	13080	Non-CGI	FALSE	FALSE	TRUE
cg25996688	chr14	21550211	21550212	NDRG2	57447	-11179	Non-CGI	FALSE	TRUE	FALSE
cg03163343	chr1	45118395	45118396	TMEM53	79639	21702	CGI-N-Shore	FALSE	FALSE	TRUE
cg06288351	chr20	43729897	43729898	KCNS1	3787	-143	CGI-S-Shore	TRUE	FALSE	FALSE
cg08150250	chr17	36739017	36739018	SRCIN1	80725	23164	CGI-S-Shelf	FALSE	TRUE	FALSE
cg15228639	chr15	42289939	42289940	EHD4	30844	-25183	Non-CGI	TRUE	TRUE	FALSE
ch.15.67797584R	chr15	70010530	70010532	LINC00593	414926	-117040	Non-CGI	FALSE	FALSE	TRUE
cg09108532	chr11	76481977	76481978	TSKU	25987	-12306	Non-CGI	FALSE	FALSE	TRUE
cg27004870	chr16	88850384	88850385	PIEZO1	9780	986	CGI	FALSE	TRUE	FALSE
cg12263377	chr2	237982246	237982247	COPS8	10920	-11836	Non-CGI	FALSE	TRUE	FALSE
cg00495658	chr10	48417904	48417905	GDF2	2658	-1050	CGI-S-Shore	TRUE	FALSE	FALSE
cg06388350	chr4	95334135	95334136	PDLIM5	10611	-38901	Non-CGI	FALSE	FALSE	TRUE
cg10376827	chr10	88730324	88730325	AGAP11	119385	-172	CGI-S-Shore	TRUE	TRUE	FALSE
cg06181697	chr3	50294603	50294604	SEMA3B	7869	-10435	CGI-N-Shelf	FALSE	TRUE	FALSE
cg09652746	chr16	67225437	67225438	E2F4	1874	-629	CGI-N-Shore	TRUE	FALSE	FALSE
cg01264729	chr16	14622974	14622975	PARN	5073	101152	CGI-N-Shelf	FALSE	TRUE	FALSE
cg10695490	chr19	49659299	49659300	HRC	3270	-617	CGI-N-Shore	TRUE	FALSE	FALSE
cg25879836	chr11	6632799	6632800	TAF10	6881	674	CGI-N-Shore	FALSE	TRUE	FALSE
cg16624521	chr5	172064552	172064553	NEURL1B	54492	-3722	CGI-N-Shelf	FALSE	FALSE	TRUE
cg19154116	chr6	32005786	32005787	CYP21A2	1589	-305	CGI-N-Shelf	TRUE	FALSE	FALSE
cg17095489	chr8	128264282	128264283	POU5F1B	5462	-163573	Non-CGI	FALSE	FALSE	TRUE
cg03890680	chr1	227504721	227504722	CDC42BPA	8476	1103	CGI-N-Shore	TRUE	FALSE	FALSE
cg15449870	chr1	11795985	11795986	AGTRAP	57085	-155	CGI-N-Shore	TRUE	FALSE	FALSE
cg00911776	chr7	130682239	130682240	LOC646329	646329	-84169	Non-CGI	FALSE	TRUE	FALSE
cg19400520	chr20	55667544	55667545	BMP7	655	174161	CGI-S-Shore	FALSE	FALSE	TRUE
cg16140558	chr8	41514039	41514040	MIR486	619554	3985	CGI-S-Shelf	FALSE	TRUE	FALSE
cg02641539	chr8	105351190	105351191	DCSTAMP	81501	-862	Non-CGI	TRUE	FALSE	FALSE
cg16110788	chr7	22602133	22602134	LOC100506178	100506178	-821	Non-CGI	TRUE	FALSE	FALSE
cg12862231	chr5	149466091	149466092	CSF1R	1436	26842	Non-CGI	TRUE	TRUE	FALSE
cg11014740	chr2	129079223	129079224	HS6ST1	9394	-3051	CGI-S-Shore	FALSE	FALSE	TRUE
cg11573518	chr7	73721031	73721032	CLIP2	7461	17225	Non-CGI	FALSE	TRUE	FALSE
cg01173650	chr2	218938006	218938007	CXCR2P1	3580	-11992	Non-CGI	TRUE	TRUE	FALSE
cg21334048	chr17	79450925	79450926	ACTG1	71	28965	CGI	FALSE	FALSE	TRUE
cg02283691	chr19	33182526	33182527	NUDT19	390916	-339	CGI-N-Shore	TRUE	FALSE	FALSE
cg00163199	chr17	18089483	18089484	ALKBH5	54890	2615	CGI-S-Shore	TRUE	TRUE	FALSE
cg03405560	chr16	31884740	31884741	ZNF267	10308	-337	CGI	TRUE	FALSE	FALSE
cg17024199	chr17	74881747	74881748	MGAT5B	146664	16948	CGI-S-Shelf	FALSE	TRUE	FALSE
cg06227019	chr2	242479660	242479661	BOK	666	-18484	CGI-N-Shore	FALSE	FALSE	TRUE
cg04924028	chr1	65535397	65535398	MIR101-1	406893	-11205	CGI-S-Shore	FALSE	FALSE	TRUE
cg06583921	chr3	193495351	193495352	OPA1	4976	184417	Non-CGI	FALSE	FALSE	TRUE
cg00035937	chr7	91874085	91874086	KRIT1	889	1327	CGI-N-Shore	TRUE	TRUE	FALSE
cg16000683	chr1	34107395	34107396	ZSCAN20	7579	169162	Non-CGI	FALSE	TRUE	FALSE
cg14832954	chr1	100731266	100731267	RTCA	8634	-446	CGI-N-Shore	TRUE	FALSE	FALSE
cg23899359	chr19	2051565	2051566	MKNK2	2872	-321	CGI-S-Shore	TRUE	FALSE	FALSE
cg18670076	chr3	189675162	189675163	MIR944	100126340	127450	Non-CGI	FALSE	TRUE	FALSE
cg24781737	chr11	66034681	66034682	RAB1B	81876	-1373	CGI-N-Shore	TRUE	TRUE	FALSE
cg00541638	chr16	9056115	9056116	USP7	7874	1224	CGI-N-Shore	FALSE	TRUE	FALSE
cg09323835	chr13	24041251	24041252	LINC00327	100506697	-2398	CGI-S-Shore	FALSE	FALSE	TRUE
cg19864060	chr1	218382922	218382923	RRP15	51018	-75705	Non-CGI	FALSE	FALSE	TRUE
cg27409771	chr16	10711296	10711297	EMP2	2013	-36756	Non-CGI	FALSE	FALSE	TRUE
cg02792560	chr19	18561264	18561265	ISYNA1	51477	-12152	CGI-N-Shore	FALSE	TRUE	FALSE
cg01521274	chr14	71822452	71822453	SNORD56B	319139	-42600	Non-CGI	FALSE	FALSE	TRUE
cg01447748	chr1	51985259	51985260	EPS15	2060	-263	CGI-S-Shore	TRUE	FALSE	FALSE
cg05046306	chr17	46698273	46698274	HOXB9	3219	5560	CGI-S-Shore	FALSE	FALSE	TRUE
cg08398371	chr19	41814839	41814840	CCDC97	90324	-1253	CGI-N-Shore	TRUE	FALSE	FALSE
cg17381426	chr7	140374125	140374126	ADCK2	90956	1171	CGI-S-Shore	FALSE	TRUE	FALSE
cg04986004	chr5	136984794	136984795	MIR874	100126343	-1455	Non-CGI	TRUE	TRUE	FALSE
cg27178677	chr20	8834803	8834804	PLCB4	5332	-214896	Non-CGI	FALSE	TRUE	FALSE
cg19054685	chr6	30894071	30894072	SFTA2	389376	5879	Non-CGI	FALSE	TRUE	FALSE
cg23379309	chr9	102057328	102057329	SEC61B	10952	72757	CGI-N-Shore	FALSE	FALSE	TRUE
cg27514333	chr15	66996626	66996627	SMAD6	4091	1951	CGI-S-Shore	FALSE	TRUE	FALSE
cg17343253	chr4	185016264	185016265	ENPP6	133121	122848	CGI-N-Shelf	FALSE	TRUE	FALSE
cg00127150	chr22	22862144	22862145	ZNF280B	140883	1359	CGI-N-Shore	TRUE	TRUE	FALSE
cg20881175	chr2	218741790	218741791	DIRC3	729582	-120473	Non-CGI	FALSE	TRUE	FALSE
cg00415704	chr15	93630536	93630537	RGMA	56963	1905	CGI-N-Shore	FALSE	TRUE	FALSE
cg09027133	chr1	25945042	25945043	MAN1C1	57134	1082	CGI-S-Shore	FALSE	TRUE	FALSE
cg04261607	chr11	65150871	65150872	SLC25A45	283130	299	CGI-N-Shelf	TRUE	FALSE	FALSE
cg23051559	chr11	119015827	119015828	ABCG4	64137	-3921	CGI-N-Shelf	FALSE	FALSE	TRUE
cg14218629	chr1	204156575	204156576	KISS1	3814	9042	CGI-N-Shelf	FALSE	FALSE	TRUE
cg06154903	chr11	64642558	64642559	EHD1	10938	4589	CGI-N-Shelf	FALSE	TRUE	FALSE
cg05381960	chr1	153946822	153946823	JTB	10899	3627	CGI-N-Shelf	FALSE	TRUE	FALSE
cg01034993	chr15	68992751	68992752	MIR4312	100422971	101511	Non-CGI	FALSE	TRUE	FALSE
cg14615152	chr1	34093099	34093100	ZSCAN20	7579	154866	CGI-S-Shelf	FALSE	TRUE	FALSE
cg14790000	chr5	127805611	127805612	FBN2	2201	68303	Non-CGI	FALSE	TRUE	FALSE
cg12807924	chr20	36013546	36013547	SRC	6714	40457	CGI	FALSE	TRUE	FALSE
cg19913118	chr1	145471701	145471702	ANKRD34A	284615	1192	CGI-S-Shore	TRUE	TRUE	FALSE
cg08425229	chr1	3470175	3470176	MIR551A	693135	7177	CGI-S-Shelf	FALSE	TRUE	FALSE
cg16006701	chr6	2751402	2751403	MYLK4	340156	-247	Non-CGI	TRUE	FALSE	FALSE
cg04844693	chr1	29240554	29240555	EPB41	2035	26950	CGI-N-Shore	TRUE	TRUE	FALSE
cg02311364	chr3	13001256	13001257	IQSEC1	9922	113359	Non-CGI	FALSE	TRUE	FALSE
cg18404041	chr3	52824283	52824284	ITIH3	3699	-4499	Non-CGI	FALSE	TRUE	FALSE
cg10587082	chr1	208293478	208293479	PLXNA2	5362	124185	Non-CGI	FALSE	TRUE	FALSE
cg25278941	chr6	139795527	139795528	LOC645434	645434	204	Non-CGI	FALSE	TRUE	FALSE
cg18264284	chr17	63102478	63102479	RGS9	8787	-30976	Non-CGI	FALSE	FALSE	TRUE
cg03226435	chr1	3058199	3058200	MIR4251	100422968	13659	CGI-S-Shore	FALSE	TRUE	FALSE
cg00708603	chr2	16463534	16463535	MYCNOS	10408	-381688	Non-CGI	FALSE	FALSE	TRUE
cg18139806	chr3	64354189	64354190	PRICKLE2	166336	-143057	Non-CGI	FALSE	FALSE	TRUE
cg10480239	chr22	23522307	23522308	BCR	613	-243	CGI	TRUE	FALSE	FALSE
cg13168012	chr11	60692978	60692979	TMEM132A	54972	1064	CGI-S-Shore	TRUE	TRUE	FALSE
cg03173570	chr21	33031392	33031393	SOD1	6647	-541	CGI-N-Shore	TRUE	TRUE	FALSE
cg27563048	chr3	52008788	52008789	ABHD14A-ACY1	100526760	-252	CGI	TRUE	TRUE	FALSE
cg13067816	chr22	24402088	24402089	GSTTP2	653399	-188	Non-CGI	TRUE	FALSE	FALSE
cg01589860	chr11	72433836	72433837	PDE2A	5138	-48338	CGI-N-Shelf	TRUE	TRUE	FALSE
cg01874183	chr8	120548252	120548253	ENPP2	5168	102852	Non-CGI	FALSE	FALSE	TRUE
cg15197893	chr1	151416412	151416413	POGZ	23126	15527	Non-CGI	TRUE	TRUE	FALSE
cg02216780	chr13	46497736	46497737	SIAH3	283514	-71889	Non-CGI	FALSE	FALSE	TRUE
cg07529654	chr18	3447016	3447017	TGIF1	7050	34943	CGI-N-Shore	TRUE	TRUE	FALSE
cg18037834	chr12	53445199	53445200	LOC283335	283335	3021	CGI-S-Shelf	FALSE	TRUE	FALSE
cg07416733	chr11	66834385	66834386	RHOD	29984	10095	Non-CGI	FALSE	TRUE	FALSE
cg14894097	chr2	227173967	227173968	IRS1	3667	489537	Non-CGI	FALSE	FALSE	TRUE
cg10323433	chr13	47471562	47471563	HTR2A	3356	-392	CGI-S-Shelf	TRUE	FALSE	FALSE
cg01456243	chr15	91478982	91478983	HDDC3	374659	-3207	CGI	FALSE	TRUE	FALSE
cg17479956	chr11	44115929	44115930	EXT2	2132	18852	CGI-N-Shore	TRUE	TRUE	FALSE
cg25528121	chr3	14860793	14860794	FGD5	152273	323	CGI-N-Shore	TRUE	FALSE	FALSE
cg14699112	chr4	141170338	141170339	SCOC	60592	-8100	CGI-N-Shelf	FALSE	FALSE	TRUE
cg03124318	chr12	109491989	109491990	USP30-AS1	100131733	-218	CGI-S-Shore	TRUE	TRUE	FALSE
cg22976533	chr14	105784090	105784091	BRF1	2972	-2175	CGI-S-Shore	FALSE	TRUE	FALSE
cg00582628	chr8	54764515	54764516	RGS20	8601	146	Non-CGI	TRUE	FALSE	FALSE
cg15482717	chr11	70053254	70053255	FADD	8772	3984	CGI-S-Shelf	FALSE	TRUE	FALSE
cg00352780	chr20	33544183	33544184	MYH7B	57644	478	CGI-S-Shore	TRUE	TRUE	FALSE
cg18042586	chr8	22288224	22288225	PPP3CC	5533	-10257	Non-CGI	FALSE	TRUE	FALSE
cg26334801	chr1	179715055	179715056	FAM163A	148753	18139	CGI-S-Shore	FALSE	TRUE	FALSE
cg02423574	chr11	119066560	119066561	CCDC153	283152	148	Non-CGI	TRUE	FALSE	FALSE
cg04881228	chr2	64557277	64557278	LGALSL	29094	-124048	Non-CGI	FALSE	FALSE	TRUE
cg02461767	chr2	27497755	27497756	SLC30A3	7781	431	CGI-N-Shore	TRUE	TRUE	FALSE
cg22306038	chr17	48845758	48845759	LINC00483	55018	-839	Non-CGI	TRUE	FALSE	FALSE
cg12166476	chr13	76334866	76334867	LMO7	4008	140295	Non-CGI	TRUE	TRUE	FALSE
cg17328407	chr5	157288521	157288522	CLINT1	9685	-2337	CGI-S-Shelf	FALSE	FALSE	TRUE
cg14255824	chr9	71795999	71796000	TJP2	9414	59818	Non-CGI	FALSE	TRUE	FALSE
cg00934987	chr17	56605468	56605469	MTMR4	9110	-10216	CGI-N-Shelf	TRUE	TRUE	FALSE
cg00338479	chr1	38551357	38551358	MIR3659	100500801	-3544	Non-CGI	FALSE	FALSE	TRUE
[truncated: 58,157 more rows]

## Sheet: Glia
Supplemental Table5: List of CpG sites hypomethylated in glia during aging
Target ID	Chromosome	start	end	nearest.gene	nearest.gene.id	disttotss	hmm.cpgi	prom.reg	intra.reg	inter.reg
cg00002224	chr8	144120399	144120400	C8orf31	286122	-278	CGI	TRUE	FALSE	FALSE
cg00003305	chr19	30715645	30715646	ZNF536	9745	-147681	CGI	FALSE	FALSE	TRUE
cg00004429	chr9	140681206	140681207	FLJ40292	643210	23731	CGI	FALSE	TRUE	FALSE
cg00007221	chr1	43999020	43999021	PTPRF	5792	2472	CGI-S-Shore	FALSE	TRUE	FALSE
cg00008564	chr6	27830391	27830392	HIST1H2AL	8332	-2714	CGI-N-Shore	FALSE	FALSE	TRUE
cg00013006	chr11	4389856	4389857	OR52B4	143496	-239	Non-CGI	TRUE	FALSE	FALSE
cg00017271	chr17	76220743	76220744	TMEM235	283999	-6646	CGI	TRUE	TRUE	FALSE
cg00019678	chr12	110154229	110154230	FAM222A	84915	2041	CGI-S-Shore	FALSE	TRUE	FALSE
cg00020390	chr7	100727888	100727889	TRIM56	81844	-896	CGI-N-Shelf	TRUE	FALSE	FALSE
cg00020446	chr12	124585444	124585445	ZNF664-FAM101A	100533183	127681	CGI	FALSE	TRUE	FALSE
cg00024516	chr4	123506194	123506195	IL21	59067	36015	Non-CGI	FALSE	FALSE	TRUE
cg00026412	chr10	62059894	62059895	C10orf40	283025	-339222	Non-CGI	FALSE	TRUE	FALSE
cg00026474	chr8	134585500	134585501	ST3GAL1	6482	-1316	CGI-S-Shore	TRUE	FALSE	FALSE
cg00027650	chr15	57510575	57510576	LOC283663	283663	-81986	Non-CGI	TRUE	TRUE	FALSE
cg00032701	chr19	7911195	7911196	EVI5L	115704	16033	CGI-N-Shelf	TRUE	TRUE	FALSE
cg00033490	chr7	87027887	87027888	CROT	54677	52935	Non-CGI	FALSE	TRUE	FALSE
cg00034154	chr19	10337163	10337164	MIR4322	100422925	-3924	CGI-S-Shore	TRUE	TRUE	FALSE
cg00034769	chr14	98444533	98444534	C14orf64	388011	-71	Non-CGI	TRUE	FALSE	FALSE
cg00035636	chr13	21900591	21900592	ZDHHC20	253832	132915	CGI	FALSE	TRUE	FALSE
cg00040575	chr22	18506180	18506181	MICAL3	57553	1143	CGI-N-Shore	FALSE	TRUE	FALSE
cg00041270	chr4	26016797	26016798	C4orf52	389203	100982	Non-CGI	FALSE	FALSE	TRUE
cg00041666	chr6	152702330	152702331	SYNE1	23345	256202	Non-CGI	TRUE	TRUE	FALSE
cg00043444	chr6	134384706	134384707	SLC2A12	154091	-10916	Non-CGI	FALSE	FALSE	TRUE
cg00048370	chr6	164506939	164506940	QKI	9444	671263	CGI	FALSE	FALSE	TRUE
cg00050496	chr12	110211701	110211702	FAM222A-AS1	84983	-408	Non-CGI	TRUE	FALSE	FALSE
cg00050938	chr3	50296100	50296101	SEMA3B	7869	-8938	CGI-N-Shore	TRUE	TRUE	FALSE
cg00053086	chr1	233119296	233119297	NTPCR	84284	32925	CGI	FALSE	FALSE	TRUE
cg00058887	chr4	184909018	184909019	STOX2	56977	82508	CGI	FALSE	TRUE	FALSE
cg00059089	chr2	153263288	153263289	FMNL2	114793	71536	Non-CGI	FALSE	TRUE	FALSE
cg00059652	chr17	67605498	67605499	MAP2K6	5608	194659	Non-CGI	FALSE	TRUE	FALSE
cg00061031	chr9	100744026	100744027	ANP32B	10541	-1461	CGI-N-Shore	TRUE	FALSE	FALSE
cg00067518	chr1	7763225	7763226	VAMP3	9341	-68102	CGI-N-Shore	FALSE	TRUE	FALSE
cg00067758	chr6	92185790	92185791	MIR4643	100616174	-45586	Non-CGI	FALSE	FALSE	TRUE
cg00071012	chr15	22442048	22442049	OR4N3P	390539	28585	Non-CGI	FALSE	TRUE	FALSE
cg00071391	chr4	126560514	126560515	MIR2054	100302267	132099	Non-CGI	FALSE	FALSE	TRUE
cg00071984	chr3	60617504	60617505	FHIT	2272	619627	Non-CGI	FALSE	TRUE	FALSE
cg00074365	chr2	64088479	64088480	UGP2	7360	20380	Non-CGI	FALSE	TRUE	FALSE
cg00075975	chr1	230491641	230491642	PGBD5	79605	21748	CGI-N-Shore	FALSE	TRUE	FALSE
cg00077904	chr5	151078909	151078910	SPARC	6678	-12391	Non-CGI	FALSE	FALSE	TRUE
cg00078299	chr8	124284379	124284380	ZHX1-C8ORF76	100533106	2346	CGI-N-Shore	FALSE	TRUE	FALSE
cg00084347	chr12	124393913	124393914	CCDC92	80212	63248	CGI	FALSE	TRUE	FALSE
cg00084432	chr13	36944471	36944472	SPG20	23111	-153	Non-CGI	TRUE	FALSE	FALSE
cg00087244	chr7	74042487	74042488	GTF2I	2969	-29541	Non-CGI	FALSE	FALSE	TRUE
cg00088989	chr2	96968012	96968013	SNRNP200	23020	3293	CGI-N-Shelf	FALSE	TRUE	FALSE
cg00089384	chr15	51972699	51972700	SCG3	29106	-849	CGI-N-Shore	TRUE	FALSE	FALSE
cg00091960	chr7	126829514	126829515	GRM8	2918	63631	Non-CGI	FALSE	TRUE	FALSE
cg00093099	chr18	2849071	2849072	EMILIN2	84034	2042	CGI-S-Shore	FALSE	TRUE	FALSE
cg00093643	chr15	44579510	44579511	CASC4	113201	-1397	CGI-N-Shore	TRUE	FALSE	FALSE
cg00094734	chr2	96830479	96830480	DUSP2	1844	-19299	Non-CGI	FALSE	FALSE	TRUE
cg00095326	chr1	228940949	228940950	DUSP5P1	574029	160554	Non-CGI	FALSE	FALSE	TRUE
cg00095930	chr12	109569116	109569117	ACACB	32	14715	Non-CGI	FALSE	TRUE	FALSE
cg00100538	chr4	184067792	184067793	WWC2	80014	47328	Non-CGI	FALSE	TRUE	FALSE
cg00101350	chr22	39883192	39883193	SMCR7L	54471	-12911	CGI-N-Shore	TRUE	TRUE	FALSE
cg00101629	chr1	15068966	15068967	KAZN	23254	143752	Non-CGI	FALSE	TRUE	FALSE
cg00103299	chr15	93362247	93362248	ASB9P1	728619	23532	CGI-N-Shore	FALSE	FALSE	TRUE
cg00104608	chr3	76146501	76146502	ROBO2	6092	159855	Non-CGI	FALSE	TRUE	FALSE
cg00105102	chr1	156217178	156217179	PAQR6	79957	663	CGI-S-Shore	FALSE	TRUE	FALSE
cg00111823	chr22	38479215	38479216	SLC16A8	23539	-44	CGI	TRUE	FALSE	FALSE
cg00118783	chr16	1069760	1069761	SOX8	30812	37951	CGI	FALSE	FALSE	TRUE
cg00120332	chr6	88432950	88432951	AKIRIN2	55122	-20964	Non-CGI	FALSE	FALSE	TRUE
cg00120473	chr4	7330616	7330617	MIR4798	100616471	18438	Non-CGI	FALSE	TRUE	FALSE
cg00124009	chr1	201439578	201439579	PHLDA3	23612	-1278	CGI-S-Shore	TRUE	FALSE	FALSE
cg00124095	chr3	72305082	72305083	LOC201617	201617	104673	Non-CGI	FALSE	FALSE	TRUE
cg00124133	chr15	89476436	89476437	MFGE8	4240	-19772	Non-CGI	FALSE	FALSE	TRUE
cg00126889	chr8	42103037	42103038	IKBKB	3551	-25781	Non-CGI	FALSE	FALSE	TRUE
cg00128054	chr3	99945494	99945495	TBC1D23	55773	-34190	CGI-S-Shore	FALSE	FALSE	TRUE
cg00130342	chr17	72266617	72266618	DNAI2	64446	-3767	CGI-N-Shelf	FALSE	FALSE	TRUE
cg00131705	chr16	615073	615074	NHLRC4	283948	-1957	CGI	TRUE	TRUE	FALSE
cg00132888	chr13	26599785	26599786	SHISA2	387914	25411	Non-CGI	FALSE	FALSE	TRUE
cg00136547	chr6	56507796	56507797	DST	667	208916	Non-CGI	TRUE	TRUE	FALSE
cg00136968	chr7	4050043	4050044	FOXK1	221937	-633343	CGI	TRUE	TRUE	FALSE
cg00137840	chr4	124301236	124301237	SPRY1	10252	-16718	Non-CGI	FALSE	FALSE	TRUE
cg00142378	chr18	51793448	51793449	POLI	11201	-2399	CGI-N-Shelf	FALSE	FALSE	TRUE
cg00142482	chr10	50396833	50396834	C10orf128	170371	-425	Non-CGI	TRUE	FALSE	FALSE
cg00145732	chr16	1095673	1095674	SSTR5	6755	-27081	CGI	FALSE	FALSE	TRUE
cg00146756	chr4	6729110	6729111	BLOC1S4	55330	11267	CGI	FALSE	FALSE	TRUE
cg00148522	chr16	27711154	27711155	KIAA0556	23247	149685	Non-CGI	FALSE	TRUE	FALSE
cg00149537	chr1	9409810	9409811	SPSB1	80176	56868	CGI-S-Shore	FALSE	TRUE	FALSE
cg00151370	chr6	16323285	16323286	GMPR	2766	84473	CGI-N-Shelf	FALSE	TRUE	FALSE
cg00152041	chr20	61274867	61274868	SLCO4A1	28231	1069	CGI	FALSE	TRUE	FALSE
cg00156230	chr7	45073692	45073693	CCM2	83605	34346	Non-CGI	FALSE	TRUE	FALSE
cg00157016	chr2	24344064	24344065	PFN4	375189	2085	CGI-N-Shore	FALSE	TRUE	FALSE
cg00160440	chr4	134077575	134077576	PCDH10	57575	7104	CGI-S-Shelf	FALSE	TRUE	FALSE
cg00160478	chr2	20739356	20739357	RHOB	388	92520	Non-CGI	FALSE	FALSE	TRUE
cg00160583	chr1	32167512	32167513	COL16A1	1307	2254	CGI-N-Shelf	FALSE	TRUE	FALSE
cg00161124	chr1	234366259	234366260	MIR4671	100616380	-75952	CGI-N-Shore	FALSE	TRUE	FALSE
cg00162064	chr1	44998151	44998152	RNF220	55182	127190	Non-CGI	FALSE	TRUE	FALSE
cg00167820	chr8	131663355	131663356	ASAP1	50807	-207448	Non-CGI	FALSE	FALSE	TRUE
cg00169419	chr4	111530900	111530901	PITX2	5308	32377	CGI-N-Shore	FALSE	FALSE	TRUE
cg00171729	chr6	52416856	52416857	TRAM2	9697	25004	Non-CGI	FALSE	TRUE	FALSE
cg00181327	chr13	31439278	31439279	MEDAG	84935	-41032	Non-CGI	FALSE	FALSE	TRUE
cg00183888	chr7	155276880	155276881	EN2	2020	26055	CGI-S-Shore	FALSE	FALSE	TRUE
cg00185413	chr3	125927866	125927867	ALDH1L1	10840	-28380	CGI-N-Shelf	FALSE	TRUE	FALSE
cg00186909	chr12	93129288	93129289	PLEKHG7	440107	-975	Non-CGI	TRUE	FALSE	FALSE
cg00192882	chr17	19291120	19291121	MFAP4	4239	-587	Non-CGI	TRUE	FALSE	FALSE
cg00203564	chr3	176133845	176133846	TBL1XR1	79718	781201	Non-CGI	FALSE	FALSE	TRUE
cg00207890	chr16	1098059	1098060	SSTR5	6755	-24695	CGI-S-Shore	FALSE	FALSE	TRUE
cg00210127	chr16	12352233	12352234	SNX29	92017	281630	CGI-N-Shelf	FALSE	TRUE	FALSE
cg00210249	chr10	71135679	71135680	TACR2	6865	40993	Non-CGI	FALSE	TRUE	FALSE
cg00213295	chr17	32925561	32925562	TMEM132E	124842	17792	Non-CGI	FALSE	TRUE	FALSE
cg00214171	chr17	73642991	73642992	SMIM6	100130933	344	Non-CGI	TRUE	TRUE	FALSE
cg00216061	chr16	88547579	88547580	ZFPM1	161882	27564	CGI-S-Shore	FALSE	TRUE	FALSE
cg00218792	chr15	81468599	81468600	IL16	3603	-6492	Non-CGI	FALSE	FALSE	TRUE
cg00219816	chr8	96280555	96280556	LOC100616530	100616530	-507	CGI-N-Shore	TRUE	TRUE	FALSE
cg00221718	chr3	128914668	128914669	CNBP	7555	-11857	Non-CGI	FALSE	FALSE	TRUE
cg00223715	chr22	49063003	49063004	MIR4535	100616415	-113102	CGI-S-Shore	FALSE	TRUE	FALSE
cg00225697	chr6	112684258	112684259	RFPL4B	442247	15725	CGI-N-Shelf	FALSE	FALSE	TRUE
cg00226849	chr18	72201785	72201786	CNDP1	84735	92	Non-CGI	TRUE	FALSE	FALSE
cg00227093	chr5	149979838	149979839	SYNPO	11346	-802	Non-CGI	TRUE	FALSE	FALSE
cg00237010	chr12	772861	772862	NINJ2	4815	-105	Non-CGI	TRUE	FALSE	FALSE
cg00238249	chr6	71276258	71276259	C6orf57	135154	-365	CGI-N-Shore	TRUE	FALSE	FALSE
cg00239491	chr13	113405479	113405480	ATP11A	23250	60835	CGI	FALSE	TRUE	FALSE
cg00239660	chr6	130182620	130182621	ARHGAP18	93663	70	Non-CGI	TRUE	FALSE	FALSE
cg00241273	chr13	107172856	107172857	EFNB2	1948	14530	Non-CGI	FALSE	TRUE	FALSE
cg00242039	chr19	58447434	58447435	ZNF418	147686	-693	CGI-S-Shore	TRUE	FALSE	FALSE
cg00244111	chr3	149086884	149086885	TM4SF1	4071	8682	Non-CGI	FALSE	TRUE	FALSE
cg00245075	chr12	51756242	51756243	CELA1	1990	-15778	Non-CGI	FALSE	TRUE	FALSE
cg00245454	chr4	159746160	159746161	FNIP2	57600	55977	Non-CGI	FALSE	TRUE	FALSE
cg00247334	chr3	8811543	8811544	OXTR	5021	-242	CGI-S-Shore	TRUE	FALSE	FALSE
cg00247963	chr16	20863151	20863152	LOC81691	81691	45383	Non-CGI	FALSE	TRUE	FALSE
cg00248242	chr2	240867059	240867060	MIR4786	100616417	15450	CGI-N-Shore	FALSE	FALSE	TRUE
cg00249584	chr11	8833047	8833048	ST5	6764	99449	Non-CGI	TRUE	TRUE	FALSE
cg00250409	chr16	73206310	73206311	HTA	283902	80061	CGI	FALSE	FALSE	TRUE
cg00251716	chr1	243479948	243479949	MIR4677	100616343	-29528	Non-CGI	FALSE	TRUE	FALSE
cg00253398	chr22	46833806	46833807	CELSR1	9620	99259	CGI-N-Shore	FALSE	TRUE	FALSE
cg00254470	chr8	129006087	129006088	MIR1206	100302170	-15055	Non-CGI	FALSE	TRUE	FALSE
cg00254888	chr6	163880196	163880197	QKI	9444	44520	Non-CGI	FALSE	TRUE	FALSE
cg00257455	chr1	65530538	65530539	MIR101-1	406893	-6346	CGI-N-Shore	FALSE	FALSE	TRUE
cg00263248	chr14	98444151	98444152	C14orf64	388011	308	Non-CGI	FALSE	TRUE	FALSE
cg00269140	chr7	86389542	86389543	GRM3	2913	116311	Non-CGI	FALSE	TRUE	FALSE
cg00269659	chr16	27729685	27729686	KIAA0556	23247	168216	Non-CGI	FALSE	TRUE	FALSE
cg00277384	chr10	105454768	105454769	LOC100505839	100505839	-51767	CGI-S-Shore	TRUE	TRUE	FALSE
cg00277714	chr13	30459305	30459306	UBL3	5412	-34484	Non-CGI	FALSE	FALSE	TRUE
cg00278392	chr6	16802505	16802506	ATXN1	6310	-40783	Non-CGI	FALSE	FALSE	TRUE
cg00284386	chr8	1786207	1786208	ARHGEF10	9639	14057	CGI-S-Shore	FALSE	TRUE	FALSE
cg00286119	chr8	29732574	29732575	LOC286135	286135	-46453	Non-CGI	FALSE	FALSE	TRUE
cg00288957	chr15	65203541	65203542	ANKDD1A	348094	-558	CGI-N-Shore	TRUE	FALSE	FALSE
cg00290101	chr11	92624742	92624743	MTNR1B	4544	-78045	Non-CGI	FALSE	TRUE	FALSE
cg00292071	chr7	2248948	2248949	MAD1L1	8379	23633	CGI-N-Shore	FALSE	TRUE	FALSE
cg00293626	chr8	143463227	143463228	TSNARE1	203062	21314	CGI-N-Shore	FALSE	TRUE	FALSE
cg00294109	chr3	3219781	3219782	CRBN	51185	1618	CGI-N-Shore	FALSE	TRUE	FALSE
cg00294261	chr5	124091260	124091261	ZNF608	57507	-6759	Non-CGI	FALSE	FALSE	TRUE
cg00294550	chr10	62144786	62144787	ANK3	288	348496	Non-CGI	FALSE	TRUE	FALSE
cg00300298	chr20	30308956	30308957	BCL2L1	598	1698	CGI-N-Shore	FALSE	TRUE	FALSE
cg00300627	chr9	132646360	132646361	USP20	10868	48663	CGI-N-Shore	FALSE	FALSE	TRUE
cg00302763	chr15	22442000	22442001	OR4N3P	390539	28537	Non-CGI	FALSE	TRUE	FALSE
cg00303429	chr7	13782482	13782483	ETV1	2115	248566	Non-CGI	FALSE	FALSE	TRUE
cg00304185	chr16	1033074	1033075	SOX8	30812	1265	CGI	TRUE	TRUE	FALSE
cg00305629	chr9	117265998	117265999	DFNB31	25861	1736	CGI-N-Shore	TRUE	TRUE	FALSE
cg00305774	chr1	1361077	1361078	TMEM88B	643965	-429	CGI-N-Shore	TRUE	FALSE	FALSE
cg00308440	chr7	14874108	14874109	DGKB	1607	68440	Non-CGI	FALSE	TRUE	FALSE
cg00308503	chr5	160171384	160171385	ATP10B	23120	107833	Non-CGI	FALSE	TRUE	FALSE
cg00309133	chr15	69452320	69452321	GLCE	26035	-651	CGI-N-Shore	TRUE	TRUE	FALSE
cg00315487	chr3	44906755	44906756	TMEM42	131616	3346	CGI-S-Shelf	FALSE	TRUE	FALSE
cg00315563	chr3	182243039	182243040	FLJ46066	401103	-38888	Non-CGI	FALSE	FALSE	TRUE
cg00317577	chr15	83239908	83239909	RPS17	6218	-30699	Non-CGI	FALSE	TRUE	FALSE
cg00319595	chr16	75300861	75300862	BCAR1	9564	1088	CGI-S-Shore	TRUE	TRUE	FALSE
cg00319774	chr8	33455184	33455185	DUSP26	78986	2253	CGI-N-Shore	FALSE	TRUE	FALSE
cg00320790	chr8	120587612	120587613	ENPP2	5168	63492	Non-CGI	FALSE	TRUE	FALSE
cg00321007	chr17	15340112	15340113	CDRT4	284040	30811	Non-CGI	FALSE	TRUE	FALSE
cg00321234	chr4	141217605	141217606	SCOC	60592	39164	Non-CGI	FALSE	TRUE	FALSE
cg00321478	chr1	197238398	197238399	CRB1	23418	67805	Non-CGI	FALSE	TRUE	FALSE
cg00324097	chr17	75446549	75446550	MIR4316	100422851	-53412	CGI-N-Shore	TRUE	TRUE	FALSE
cg00324592	chr8	42914541	42914542	FNTA	2339	3098	CGI-S-Shelf	FALSE	TRUE	FALSE
cg00328219	chr8	29033680	29033681	KIF13B	23303	86928	Non-CGI	FALSE	TRUE	FALSE
cg00328497	chr20	60551707	60551708	MIR1257	100302168	-22988	CGI-S-Shore	FALSE	TRUE	FALSE
cg00328935	chr8	142517474	142517475	MROH5	389690	-143	CGI-N-Shore	TRUE	FALSE	FALSE
cg00329411	chr5	55881858	55881859	MAP3K1	4214	-229040	Non-CGI	FALSE	FALSE	TRUE
cg00329615	chr3	118706648	118706649	IGSF11	152404	158248	Non-CGI	FALSE	TRUE	FALSE
cg00332048	chr7	18535072	18535073	HDAC9	9734	408499	Non-CGI	TRUE	TRUE	FALSE
cg00332509	chr16	89363830	89363831	LOC100287036	100287036	-23709	CGI	FALSE	TRUE	FALSE
cg00333583	chr15	85589274	85589275	PDE8A	5151	65529	Non-CGI	FALSE	TRUE	FALSE
cg00335286	chr18	13916355	13916356	MC2R	4158	-819	Non-CGI	TRUE	FALSE	FALSE
cg00335361	chr1	174417375	174417376	GPR52	9293	162	Non-CGI	TRUE	TRUE	FALSE
cg00336800	chr19	1450386	1450387	APC2	10297	237	CGI	TRUE	TRUE	FALSE
cg00339415	chr9	136085771	136085772	OBP2B	29989	-1142	Non-CGI	TRUE	FALSE	FALSE
cg00339695	chr16	24857497	24857498	SLC5A11	115584	180	Non-CGI	TRUE	TRUE	FALSE
cg00341042	chr10	116854499	116854500	ATRNL1	26033	1374	CGI-S-Shore	FALSE	TRUE	FALSE
cg00341191	chr10	126332072	126332073	FAM53B	9679	146833	CGI	FALSE	TRUE	FALSE
cg00341732	chr22	31479561	31479562	SMTN	6525	2278	CGI-N-Shore	TRUE	TRUE	FALSE
cg00342530	chr9	130027020	130027021	GARNL3	84253	1078	Non-CGI	TRUE	TRUE	FALSE
cg00344308	chr3	30273887	30273888	TGFBR2	7048	-374105	Non-CGI	FALSE	FALSE	TRUE
cg00344445	chr11	128647107	128647108	FLI1-AS1	100507392	-81188	CGI	FALSE	TRUE	FALSE
cg00344888	chr15	58699976	58699977	LIPC	3990	-2797	Non-CGI	FALSE	FALSE	TRUE
cg00349404	chr10	106100036	106100037	ITPRIP	85450	-1873	CGI-S-Shore	TRUE	FALSE	FALSE
cg00349573	chr1	242611826	242611827	PLD5	200150	76170	Non-CGI	FALSE	TRUE	FALSE
cg00351047	chr19	15234963	15234964	ILVBL	10994	1612	CGI-N-Shore	FALSE	TRUE	FALSE
cg00351119	chr6	143836747	143836748	FUCA2	2519	-3726	CGI-S-Shelf	FALSE	FALSE	TRUE
cg00351472	chr9	97846551	97846552	MIR23B	407011	-937	CGI-S-Shore	TRUE	TRUE	FALSE
cg00351554	chr17	210047	210048	RPH3AL	9501	-7413	CGI-S-Shore	FALSE	FALSE	TRUE
cg00352106	chr1	39864197	39864198	KIAA0754	643314	-10977	Non-CGI	FALSE	TRUE	FALSE
cg00352560	chr1	45106266	45106267	TMEM53	79639	33831	CGI-N-Shore	FALSE	TRUE	FALSE
cg00352652	chr16	88547533	88547534	ZFPM1	161882	27518	CGI-S-Shore	FALSE	TRUE	FALSE
cg00352780	chr20	33544183	33544184	MYH7B	57644	478	CGI-S-Shore	TRUE	TRUE	FALSE
cg00354884	chr17	1057541	1057542	ABR	29	33073	CGI-S-Shore	FALSE	TRUE	FALSE
cg00356361	chr18	77286260	77286261	NFATC1	4772	130487	CGI	TRUE	TRUE	FALSE
cg00357551	chr5	169407472	169407473	FAM196B	100131897	270	Non-CGI	TRUE	TRUE	FALSE
cg00371061	chr2	10501297	10501298	HPCAL1	3241	58256	Non-CGI	FALSE	TRUE	FALSE
cg00375132	chr10	22768370	22768371	LOC100499489	100499489	-41511	CGI-S-Shore	FALSE	FALSE	TRUE
cg00376480	chr21	46892832	46892833	COL18A1-AS1	378832	-47846	CGI-S-Shore	FALSE	TRUE	FALSE
cg00376910	chr15	89765061	89765062	RLBP1	6017	-138	Non-CGI	TRUE	FALSE	FALSE
cg00376979	chr21	34350727	34350728	OLIG2	10215	-47487	CGI-N-Shore	FALSE	FALSE	TRUE
cg00377924	chr3	107535430	107535431	LINC00635	151658	61483	Non-CGI	FALSE	FALSE	TRUE
cg00379619	chr19	17793480	17793481	UNC13A	23025	5568	CGI-S-Shelf	FALSE	TRUE	FALSE
cg00380904	chr6	20468372	20468373	E2F3	1871	66234	Non-CGI	FALSE	TRUE	FALSE
cg00380924	chr6	166967377	166967378	MIR1913	100302141	-44455	Non-CGI	FALSE	TRUE	FALSE
cg00382999	chr3	136649333	136649334	IL20RB	53833	-27372	Non-CGI	TRUE	TRUE	FALSE
cg00393283	chr10	92984646	92984647	PCGF5	84333	61870	CGI-S-Shelf	FALSE	TRUE	FALSE
cg00394718	chr8	120684921	120684922	ENPP2	5168	-33814	CGI	FALSE	FALSE	TRUE
cg00395063	chr11	120210293	120210294	ARHGEF12	23365	2674	CGI-S-Shore	FALSE	TRUE	FALSE
cg00397104	chr1	3662685	3662686	TP73-AS1	57212	1250	CGI-N-Shore	TRUE	TRUE	FALSE
cg00397274	chr2	240240189	240240190	MIR4269	100423043	13031	CGI	FALSE	TRUE	FALSE
cg00397714	chr2	192815005	192815006	SDPR	8436	-102998	Non-CGI	FALSE	TRUE	FALSE
cg00402533	chr2	197458695	197458696	HECW2	57520	-1359	CGI-S-Shore	TRUE	FALSE	FALSE
cg00404053	chr1	178313656	178313657	TEX35	84066	-168554	Non-CGI	FALSE	TRUE	FALSE
cg00404923	chr4	184882211	184882212	STOX2	56977	55701	Non-CGI	FALSE	TRUE	FALSE
cg00405803	chr5	87952153	87952154	MIR9-2	407047	10602	CGI-N-Shelf	FALSE	TRUE	FALSE
cg00405939	chr19	4045108	4045109	ZBTB7A	51341	21706	CGI	FALSE	FALSE	TRUE
cg00407150	chr3	42743794	42743795	HHATL	57467	523	Non-CGI	TRUE	TRUE	FALSE
cg00412775	chr7	155724270	155724271	SHH	6469	-119302	Non-CGI	FALSE	FALSE	TRUE
cg00419094	chr12	106480579	106480580	NUAK1	9891	53230	CGI	FALSE	TRUE	FALSE
cg00423030	chr17	76037075	76037076	TNRC6C	57690	36756	CGI	FALSE	TRUE	FALSE
cg00424354	chr11	100555339	100555340	ARHGAP42	143872	-3066	CGI-N-Shelf	FALSE	TRUE	FALSE
cg00425843	chr10	94883021	94883022	CYP26A1	1592	49788	Non-CGI	FALSE	FALSE	TRUE
cg00426659	chr12	99548329	99548330	FAM71C	196472	-493197	Non-CGI	TRUE	TRUE	FALSE
cg00428636	chr8	18589742	18589743	PSD3	23362	281452	Non-CGI	FALSE	TRUE	FALSE
cg00428638	chr19	7224713	7224714	INSR	3643	69296	Non-CGI	FALSE	TRUE	FALSE
cg00430036	chr9	99145401	99145402	SLC35D2	11046	589	CGI-N-Shore	FALSE	TRUE	FALSE
cg00430287	chr6	116382876	116382877	FRK	2444	-954	Non-CGI	TRUE	FALSE	FALSE
cg00433917	chr19	7915517	7915518	EVI5L	115704	20355	CGI-S-Shore	TRUE	TRUE	FALSE
cg00438952	chr3	177149136	177149137	TBL1XR1	79718	-234087	Non-CGI	FALSE	FALSE	TRUE
cg00439384	chr3	122785558	122785559	PDIA5	10954	-296	CGI-N-Shore	TRUE	FALSE	FALSE
cg00446697	chr11	1542313	1542314	DUSP8	1850	50835	CGI-S-Shelf	FALSE	TRUE	FALSE
cg00447817	chr11	70484490	70484491	MIR3664	100500844	233981	Non-CGI	FALSE	TRUE	FALSE
cg00448868	chr16	66775493	66775494	DYNC1LI2	1783	10030	Non-CGI	FALSE	TRUE	FALSE
cg00449767	chr19	45737603	45737604	EXOC3L2	90332	-133	CGI	TRUE	FALSE	FALSE
cg00452755	chr1	28864993	28864994	TRNAU1AP	54952	-14534	Non-CGI	FALSE	TRUE	FALSE
cg00454290	chr2	130634806	130634807	LOC389033	389033	57082	CGI-N-Shore	FALSE	FALSE	TRUE
cg00455796	chr19	11475827	11475828	SWSAP1	126074	-9554	CGI-S-Shelf	FALSE	TRUE	FALSE
cg00458454	chr10	134499528	134499529	NKX6-2	84504	100007	CGI	FALSE	TRUE	FALSE
cg00458754	chr10	88427813	88427814	LDB3	11155	1261	Non-CGI	TRUE	TRUE	FALSE
cg00461650	chr16	14003724	14003725	ERCC4	2072	-10288	Non-CGI	FALSE	FALSE	TRUE
cg00462700	chr10	134021845	134021846	DPYSL4	10570	21430	CGI	FALSE	TRUE	FALSE
cg00463957	chr16	14583487	14583488	PARN	5073	140639	Non-CGI	FALSE	TRUE	FALSE
cg00465319	chr3	123339568	123339569	MYLK-AS1	100506826	35164	Non-CGI	TRUE	TRUE	FALSE
cg00466425	chr6	30856491	30856492	MIR4640	100616237	-2167	CGI-S-Shelf	TRUE	TRUE	FALSE
cg00468670	chr3	69371195	69371196	LMOD3	56203	-199448	Non-CGI	TRUE	TRUE	FALSE
cg00470044	chr2	28456184	28456185	LOC100505716	100505716	77140	Non-CGI	FALSE	TRUE	FALSE
cg00470183	chr6	116575913	116575914	DSE	29940	576	CGI-S-Shore	TRUE	TRUE	FALSE
cg00470636	chr8	26440349	26440350	DPYSL2	1808	68639	CGI-S-Shelf	FALSE	TRUE	FALSE
cg00470761	chr10	134595985	134595986	NKX6-2	84504	3550	CGI-S-Shore	FALSE	TRUE	FALSE
cg00472373	chr3	9833414	9833415	ARPC4	10093	-763	CGI-N-Shore	TRUE	TRUE	FALSE
cg00472879	chr10	97181896	97181897	PDLIM1	9124	-131114	Non-CGI	TRUE	TRUE	FALSE
cg00473045	chr8	120779899	120779900	TAF2	6873	65173	Non-CGI	FALSE	TRUE	FALSE
cg00473531	chr17	42843798	42843799	ADAM11	4185	7229	Non-CGI	FALSE	TRUE	FALSE
cg00474840	chr19	18120819	18120820	ARRDC2	27106	8874	CGI-S-Shore	FALSE	TRUE	FALSE
cg00475787	chr3	180641553	180641554	FXR1	8087	11318	Non-CGI	FALSE	TRUE	FALSE
cg00476430	chr8	81947741	81947742	PAG1	55824	76560	Non-CGI	FALSE	TRUE	FALSE
cg00480033	chr6	13870551	13870552	RNF182	221687	-54124	CGI-N-Shore	FALSE	FALSE	TRUE
cg00480115	chr19	35606877	35606878	FXYD3	5349	144	Non-CGI	FALSE	TRUE	FALSE
cg00480231	chr2	2196537	2196538	LOC730811	730811	-126465	CGI-S-Shelf	FALSE	TRUE	FALSE
cg00484488	chr15	73076983	73076984	ADPGK	83440	-856	CGI-S-Shore	TRUE	FALSE	FALSE
cg00484803	chr2	157196299	157196300	NR4A2	4929	-7011	CGI-N-Shore	TRUE	FALSE	FALSE
cg00487506	chr8	143692935	143692936	ARC	23237	2896	CGI-N-Shore	FALSE	TRUE	FALSE
cg00487831	chr16	67073948	67073949	CBFB	865	10897	Non-CGI	FALSE	TRUE	FALSE
cg00489795	chr22	24041104	24041105	RGL4	266747	8142	Non-CGI	FALSE	TRUE	FALSE
cg00491530	chr12	53437765	53437766	TENC1	23371	-3043	CGI-N-Shelf	FALSE	TRUE	FALSE
cg00491548	chr19	3539158	3539159	C19orf71	100128569	2	CGI-S-Shelf	TRUE	TRUE	FALSE
cg00492003	chr15	78572760	78572761	DNAJA4	55466	16272	Non-CGI	FALSE	TRUE	FALSE
cg00493363	chr7	106619774	106619775	PRKAR2B	5577	-65402	Non-CGI	FALSE	FALSE	TRUE
cg00496026	chr10	102766610	102766611	LZTS2	84445	9745	CGI	FALSE	TRUE	FALSE
cg00497472	chr4	892861	892862	GAK	2580	33311	CGI-N-Shore	FALSE	TRUE	FALSE
cg00499837	chr11	119542542	119542543	PVRL1	5818	56891	Non-CGI	FALSE	TRUE	FALSE
cg00500936	chr12	121735583	121735584	CAMKK2	10645	526	CGI-S-Shore	TRUE	FALSE	FALSE
cg00502062	chr1	201578212	201578213	NAV1	89796	-39236	Non-CGI	FALSE	FALSE	TRUE
cg00502575	chr13	114800841	114800842	RASA3	22821	97252	CGI-S-Shore	FALSE	TRUE	FALSE
cg00502926	chr14	21510056	21510057	RNASE7	84659	-327	Non-CGI	TRUE	TRUE	FALSE
cg00505318	chr3	69130918	69130919	UBA3	9039	-1393	CGI-S-Shore	TRUE	FALSE	FALSE
cg00509187	chr13	44362093	44362094	ENOX1	55068	-976	CGI-S-Shore	TRUE	FALSE	FALSE
cg00511334	chr16	67918840	67918841	NRN1L	123904	58	Non-CGI	TRUE	FALSE	FALSE
cg00513941	chr19	42437245	42437246	RABAC1	10567	26281	Non-CGI	FALSE	FALSE	TRUE
cg00515954	chr12	99548504	99548505	FAM71C	196472	-493022	Non-CGI	TRUE	TRUE	FALSE
cg00519063	chr1	94373434	94373435	GCLM	2730	1576	CGI-N-Shore	FALSE	TRUE	FALSE
cg00519069	chr19	14491737	14491738	CD97	976	-217	CGI-N-Shore	TRUE	FALSE	FALSE
cg00521255	chr5	139726689	139726690	HBEGF	1839	-500	CGI-S-Shore	TRUE	FALSE	FALSE
cg00521314	chr12	95464397	95464398	NR2C1	7181	3005	CGI-N-Shelf	FALSE	TRUE	FALSE
cg00522276	chr8	67452722	67452723	C8orf46	254778	47230	CGI-N-Shore	FALSE	FALSE	TRUE
cg00524271	chr2	198668185	198668186	PLCL1	5334	-1239	CGI-N-Shore	TRUE	FALSE	FALSE
cg00524676	chr12	34537250	34537251	ALG10	84920	362033	CGI	FALSE	FALSE	TRUE
cg00525436	chr21	15456343	15456344	ANKRD20A11P	391267	-103577	CGI	FALSE	TRUE	FALSE
cg00525496	chr6	11203784	11203785	ERVFRD-1	405754	-91712	Non-CGI	FALSE	TRUE	FALSE
cg00526835	chr10	93335140	93335141	LOC100188947	100188947	36075	Non-CGI	FALSE	TRUE	FALSE
cg00527307	chr13	34208894	34208895	STARD13	90627	42036	Non-CGI	FALSE	TRUE	FALSE
cg00528490	chr2	102394306	102394307	MAP4K4	9448	80140	Non-CGI	FALSE	TRUE	FALSE
cg00528779	chr12	124926062	124926063	NCOR2	9612	125946	CGI-N-Shore	FALSE	TRUE	FALSE
cg00529236	chr16	85239958	85239959	LOC400548	400548	69201	CGI-N-Shore	FALSE	FALSE	TRUE
cg00531137	chr16	57643932	57643933	GPR56	9289	-9716	Non-CGI	FALSE	FALSE	TRUE
cg00533407	chr7	150745278	150745279	ASIC3	9311	-325	CGI-N-Shore	TRUE	FALSE	FALSE
cg00537210	chr2	23786588	23786589	KLHL29	114818	178289	CGI-S-Shore	FALSE	TRUE	FALSE
cg00538021	chr16	12192263	12192264	SNX29	92017	121660	CGI	FALSE	TRUE	FALSE
cg00539154	chr1	7181893	7181894	CAMTA1	23261	336508	CGI-N-Shelf	FALSE	TRUE	FALSE
cg00539360	chr6	43737136	43737137	VEGFA	7422	-808	CGI-N-Shore	TRUE	FALSE	FALSE
cg00540067	chr3	126074344	126074345	KLF15	28999	1890	CGI-N-Shore	FALSE	TRUE	FALSE
cg00541476	chr8	70404716	70404717	SULF1	23213	25856	CGI-N-Shore	TRUE	TRUE	FALSE
cg00541544	chr22	39150255	39150256	DNAL4	10126	39904	CGI-N-Shore	FALSE	TRUE	FALSE
cg00542224	chr10	43834363	43834364	FXYD4	53828	-32727	CGI-N-Shelf	FALSE	FALSE	TRUE
cg00543364	chr21	17961829	17961830	MIR125B2	406912	-726	Non-CGI	TRUE	TRUE	FALSE
cg00543499	chr1	51984042	51984043	EPS15	2060	951	CGI	FALSE	TRUE	FALSE
cg00546307	chr1	1946355	1946356	GABRD	2563	-4411	CGI	FALSE	TRUE	FALSE
cg00547068	chr5	169404742	169404743	FAM196B	100131897	3000	Non-CGI	FALSE	TRUE	FALSE
cg00547484	chr1	32219777	32219778	MIR4254	100423028	4557	CGI-N-Shelf	FALSE	TRUE	FALSE
cg00548911	chr17	33788026	33788027	SLFN13	146857	-12169	CGI-S-Shore	FALSE	FALSE	TRUE
cg00549398	chr17	78725201	78725202	RPTOR	57521	206575	CGI	FALSE	TRUE	FALSE
cg00549433	chr2	15700282	15700283	NBAS	51594	1170	CGI-N-Shore	FALSE	TRUE	FALSE
cg00549575	chr11	8008752	8008753	EIF3F	8665	306	CGI	TRUE	FALSE	FALSE
cg00550928	chr22	39883190	39883191	SMCR7L	54471	-12913	CGI-N-Shore	TRUE	TRUE	FALSE
cg00552490	chr2	106746466	106746467	UXS1	80146	64327	CGI-N-Shore	FALSE	TRUE	FALSE
cg00552892	chr2	220035927	220035928	SLC23A3	151295	-1109	Non-CGI	TRUE	FALSE	FALSE
cg00556627	chr2	201187003	201187004	SPATS2L	26010	16398	Non-CGI	FALSE	TRUE	FALSE
cg00557175	chr18	44626898	44626899	HDHD2	84064	49971	Non-CGI	FALSE	TRUE	FALSE
cg00557630	chr19	51017123	51017124	ASPDH	554235	822	CGI-N-Shore	TRUE	TRUE	FALSE
cg00561322	chr11	111606373	111606374	PPP2R1B	5519	30794	Non-CGI	TRUE	TRUE	FALSE
cg00561803	chr9	140265575	140265576	EXD3	54932	52137	CGI	FALSE	TRUE	FALSE
cg00562430	chr8	66475106	66475107	LOC286186	286186	-204	CGI-S-Shelf	TRUE	FALSE	FALSE
cg00563932	chr9	139871049	139871050	PTGDS	5730	1502	CGI-N-Shore	TRUE	TRUE	FALSE
cg00566320	chr1	32172204	32172205	COL16A1	1307	-2435	CGI-S-Shelf	FALSE	FALSE	TRUE
cg00566369	chr8	144935784	144935785	NRBP2	340371	-11583	Non-CGI	FALSE	FALSE	TRUE
cg00566949	chr7	32927892	32927893	KBTBD2	25948	3574	CGI-N-Shelf	FALSE	TRUE	FALSE
cg00567872	chr7	101789685	101789686	SH2B2	10603	-138718	CGI	FALSE	TRUE	FALSE
cg00568910	chr1	43429380	43429381	SLC2A1	6513	-4532	Non-CGI	FALSE	TRUE	FALSE
cg00569091	chr1	8424793	8424794	SLC45A1	50651	40402	Non-CGI	FALSE	TRUE	FALSE
cg00569276	chr1	17446545	17446546	PADI2	11240	-596	CGI-S-Shore	TRUE	FALSE	FALSE
cg00569418	chr19	50192100	50192101	ADM5	199800	157	CGI-N-Shore	TRUE	FALSE	FALSE
cg00571101	chr12	12435302	12435303	LRP6	4040	-15490	Non-CGI	FALSE	FALSE	TRUE
cg00571483	chr1	59046173	59046174	TACSTD2	4070	-3006	CGI-S-Shelf	FALSE	FALSE	TRUE
cg00572323	chr16	29706151	29706152	QPRT	23475	15709	CGI-N-Shore	FALSE	TRUE	FALSE
cg00575003	chr1	217261949	217261950	ESRRG	2104	49146	CGI-N-Shore	FALSE	TRUE	FALSE
cg00577969	chr11	122156457	122156458	MIR100HG	399959	82008	Non-CGI	FALSE	TRUE	FALSE
cg00578220	chr6	62996702	62996703	KHDRBS2	202559	-601	CGI-S-Shore	TRUE	FALSE	FALSE
cg00578304	chr7	2968627	2968628	GNA12	2768	-84667	CGI-S-Shore	FALSE	TRUE	FALSE
cg00581764	chr6	158183853	158183854	SNX9	51429	-60439	Non-CGI	FALSE	FALSE	TRUE
cg00583733	chr16	30075102	30075103	ALDOA	226	10690	CGI-N-Shore	TRUE	TRUE	FALSE
cg00584594	chr16	84951560	84951561	ZDHHC7	55625	93579	Non-CGI	FALSE	FALSE	TRUE
cg00585174	chr10	134499472	134499473	NKX6-2	84504	100063	CGI	FALSE	TRUE	FALSE
cg00589541	chr3	171844005	171844006	FNDC3B	64778	86586	Non-CGI	FALSE	TRUE	FALSE
cg00590173	chr5	75524056	75524057	SV2C	22987	144750	Non-CGI	FALSE	TRUE	FALSE
cg00591333	chr17	79109910	79109911	MIR1250	100302229	-2801	CGI-N-Shore	FALSE	TRUE	FALSE
cg00592151	chr16	25702044	25702045	HS3ST4	9951	-1301	CGI-N-Shore	TRUE	FALSE	FALSE
cg00593008	chr5	75465603	75465604	SV2C	22987	86297	CGI-N-Shore	FALSE	TRUE	FALSE
cg00594099	chr1	27893886	27893887	AHDC1	27245	36473	CGI-N-Shore	FALSE	TRUE	FALSE
cg00595472	chr11	61525251	61525252	DKFZP434K028	26070	-114	Non-CGI	TRUE	TRUE	FALSE
cg00603871	chr13	24844861	24844862	C1QTNF9	338872	-38853	Non-CGI	TRUE	TRUE	FALSE
cg00605777	chr2	97533635	97533636	SEMA4C	54910	2098	CGI-N-Shore	TRUE	TRUE	FALSE
cg00613284	chr8	67419936	67419937	C8orf46	254778	14444	CGI-S-Shelf	FALSE	TRUE	FALSE
cg00614360	chr17	80858406	80858407	ZNF750	79755	-60474	CGI	FALSE	TRUE	FALSE
cg00615485	chr7	29519656	29519657	PRR15	222171	-83769	Non-CGI	TRUE	TRUE	FALSE
cg00618626	chr17	39807901	39807902	KRT42P	284116	-11449	CGI-S-Shelf	FALSE	TRUE	FALSE
cg00621197	chr21	48018790	48018791	S100B	6285	6243	CGI	FALSE	TRUE	FALSE
cg00622988	chr5	2537906	2537907	IRX2	153572	213861	CGI	FALSE	FALSE	TRUE
cg00624037	chr12	89315201	89315202	LOC728084	728084	98266	Non-CGI	FALSE	FALSE	TRUE
cg00624410	chr16	57127968	57127969	CPNE2	221184	1512	CGI-S-Shore	FALSE	TRUE	FALSE
cg00624908	chr1	3327395	3327396	ARHGEF16	27237	-43750	CGI-S-Shore	FALSE	TRUE	FALSE
cg00626702	chr4	1647016	1647017	FAM53A	152877	38970	CGI-S-Shore	FALSE	TRUE	FALSE
cg00631327	chr8	3965218	3965219	CSMD1	64478	887108	CGI	FALSE	TRUE	FALSE
cg00632379	chr6	113306339	113306340	RFPL4B	442247	637806	Non-CGI	FALSE	FALSE	TRUE
cg00632811	chr12	108078821	108078822	PWP1	11137	-767	CGI-N-Shore	TRUE	FALSE	FALSE
cg00634483	chr8	49470964	49470965	EFCAB1	79645	176904	CGI-S-Shore	FALSE	FALSE	TRUE
cg00636527	chr5	176859356	176859357	GRK6	2870	5668	CGI-N-Shore	FALSE	TRUE	FALSE
cg00637144	chr13	52360268	52360269	DHRS12	79758	18023	Non-CGI	FALSE	TRUE	FALSE
cg00637826	chr12	12673150	12673151	DUSP16	80824	42296	Non-CGI	FALSE	TRUE	FALSE
cg00638574	chr1	209956565	209956566	C1orf74	148304	1323	CGI-N-Shore	TRUE	TRUE	FALSE
cg00641828	chr8	141715451	141715452	2002-08-01	27161	-69804	Non-CGI	FALSE	TRUE	FALSE
cg00646241	chr11	70563878	70563879	MIR3664	100500844	154593	CGI	FALSE	TRUE	FALSE
cg00648955	chr2	31456217	31456218	CAPN14	440854	505	CGI-N-Shore	TRUE	TRUE	FALSE
cg00651401	chr3	195623338	195623339	TNK2	10188	15476	CGI-S-Shore	TRUE	TRUE	FALSE
cg00651488	chr16	85236465	85236466	LOC400548	400548	65708	Non-CGI	FALSE	FALSE	TRUE
cg00655094	chr16	89104756	89104757	ACSF3	197322	-55459	CGI	FALSE	FALSE	TRUE
cg00658440	chr12	91774944	91774945	DCN	1634	-198137	Non-CGI	FALSE	FALSE	TRUE
cg00659931	chr15	102010125	102010126	PCSK6	5046	20060	CGI-S-Shore	FALSE	TRUE	FALSE
cg00661523	chr3	151985426	151985427	MBNL1	4154	-401	CGI-N-Shore	TRUE	TRUE	FALSE
cg00663183	chr3	15687950	15687951	BTD	686	44809	Non-CGI	FALSE	FALSE	TRUE
cg00665106	chr1	201515370	201515371	RPS10P7	376693	26337	Non-CGI	FALSE	FALSE	TRUE
cg00669390	chr16	85348945	85348946	LOC727710	727710	-11942	CGI-N-Shore	FALSE	FALSE	TRUE
cg00670913	chr11	98890591	98890592	CNTN5	53942	-1113	CGI-N-Shore	TRUE	FALSE	FALSE
cg00673202	chr12	117176563	117176564	RNFT2	84900	466	CGI-S-Shore	TRUE	TRUE	FALSE
cg00682487	chr4	36283275	36283276	DTHD1	401124	30	Non-CGI	TRUE	FALSE	FALSE
cg00684075	chr2	85969661	85969662	ATOH8	84913	-11246	Non-CGI	FALSE	FALSE	TRUE
cg00685314	chr12	120307689	120307690	CIT	11113	7404	Non-CGI	FALSE	TRUE	FALSE
cg00685614	chr16	89118838	89118839	ACSF3	197322	-41377	CGI	FALSE	TRUE	FALSE
cg00687444	chr16	30689627	30689628	FBRS	64319	18383	Non-CGI	FALSE	FALSE	TRUE
cg00688932	chr15	67175702	67175703	SMAD6	4091	181027	Non-CGI	FALSE	FALSE	TRUE
cg00689612	chr17	76899627	76899628	LOC100653515	100653515	-327	CGI-S-Shelf	TRUE	TRUE	FALSE
cg00692173	chr1	53217358	53217359	ZYG11B	79699	25226	Non-CGI	FALSE	TRUE	FALSE
cg00693240	chr16	4684507	4684508	MGRN1	23295	9681	CGI	FALSE	TRUE	FALSE
cg00693994	chr4	156586710	156586711	GUCY1A3	2982	-1150	CGI-N-Shore	TRUE	FALSE	FALSE
cg00695391	chr1	2525548	2525549	FAM213B	127281	7648	CGI-S-Shore	FALSE	TRUE	FALSE
cg00695760	chr1	201449404	201449405	PHLDA3	23612	-11104	CGI-N-Shore	FALSE	FALSE	TRUE
cg00696323	chr3	124520019	124520020	UMPS	7372	70805	Non-CGI	FALSE	TRUE	FALSE
cg00699461	chr21	44071900	44071901	PDE9A	5152	-1960	CGI-N-Shore	TRUE	FALSE	FALSE
cg00699986	chr20	25057444	25057445	VSX1	30813	5321	CGI-N-Shore	FALSE	TRUE	FALSE
cg00700239	chr12	119595495	119595496	HSPB8	26353	-21098	CGI-S-Shore	FALSE	TRUE	FALSE
cg00701946	chr2	54087200	54087201	GPR75	10936	-29	CGI	TRUE	FALSE	FALSE
cg00701951	chr10	124228478	124228479	HTRA1	5654	7436	Non-CGI	FALSE	TRUE	FALSE
cg00702072	chr1	54761405	54761406	MRPL37	51253	95564	Non-CGI	FALSE	TRUE	FALSE
cg00702593	chr21	42219853	42219854	DSCAM	1826	-813	CGI-S-Shore	TRUE	FALSE	FALSE
cg00705730	chr2	106438120	106438121	NCK2	8440	76599	Non-CGI	FALSE	TRUE	FALSE
cg00706191	chr16	65017401	65017402	CDH11	1009	138516	Non-CGI	TRUE	TRUE	FALSE
cg00706570	chr18	74692116	74692117	MBP	4155	152656	CGI	TRUE	TRUE	FALSE
cg00707445	chr16	87982141	87982142	BANP	54971	-2095	CGI-S-Shelf	FALSE	FALSE	TRUE
cg00707881	chr14	77571003	77571004	KIAA1737	85457	6424	Non-CGI	FALSE	TRUE	FALSE
cg00709728	chr3	124778476	124778477	HEG1	57493	-3673	CGI-S-Shelf	TRUE	FALSE	FALSE
cg00710180	chr2	95723453	95723454	MAL	4118	31973	CGI-N-Shore	FALSE	FALSE	TRUE
cg00711291	chr17	71345538	71345539	CDC42EP4	23580	-37394	Non-CGI	FALSE	TRUE	FALSE
cg00712146	chr3	65340538	65340539	MIR548A2	693126	634854	CGI-N-Shore	FALSE	TRUE	FALSE
cg00712779	chr2	202317602	202317603	STRADB	55437	1209	CGI-S-Shore	TRUE	TRUE	FALSE
cg00713400	chr7	22233206	22233207	RAPGEF5	9771	163325	Non-CGI	TRUE	TRUE	FALSE
cg00716257	chr14	75897417	75897418	JDP2	122953	2907	CGI-S-Shelf	TRUE	TRUE	FALSE
cg00716309	chr19	35719621	35719622	FAM187B	148109	5	CGI-S-Shelf	TRUE	FALSE	FALSE
cg00717219	chr13	113358414	113358415	ATP11A	23250	13770	CGI-S-Shore	FALSE	TRUE	FALSE
cg00718336	chr3	99742090	99742091	MIR548G	100313938	-25030	Non-CGI	FALSE	TRUE	FALSE
cg00718883	chr8	26493115	26493116	DPYSL2	1808	121405	Non-CGI	FALSE	TRUE	FALSE
cg00720845	chr4	774393	774394	LOC100129917	100129917	1241	CGI-N-Shore	TRUE	TRUE	FALSE
cg00723041	chr22	42304331	42304332	SHISA8	440829	6338	CGI-N-Shore	FALSE	TRUE	FALSE
cg00723137	chr18	77083734	77083735	NFATC1	4772	-72036	CGI-N-Shelf	FALSE	TRUE	FALSE
cg00724315	chr4	1941849	1941850	SCARNA22	677770	-34512	Non-CGI	FALSE	TRUE	FALSE
cg00725635	chr1	193155806	193155807	B3GALT2	8707	-62	Non-CGI	TRUE	TRUE	FALSE
cg00726147	chr7	19749584	19749585	TWISTNB	221830	-923	CGI-S-Shore	TRUE	FALSE	FALSE
cg00728655	chr7	133388430	133388431	LRGUK	136332	-423673	Non-CGI	FALSE	TRUE	FALSE
cg00729275	chr18	24445134	24445135	AQP4-AS1	147429	-136	CGI-S-Shore	TRUE	TRUE	FALSE
cg00729875	chr1	100111713	100111714	PALMD	54873	281	Non-CGI	TRUE	FALSE	FALSE
cg00730832	chr10	123353465	123353466	FGFR2	2263	4505	CGI-N-Shore	TRUE	TRUE	FALSE
cg00730887	chr4	160149604	160149605	RAPGEF2	9693	-39392	Non-CGI	FALSE	FALSE	TRUE
cg00732656	chr3	150459814	150459815	SIAH2	6478	21447	Non-CGI	FALSE	TRUE	FALSE
cg00732810	chr13	114875282	114875283	RASA3	22821	22811	CGI	FALSE	TRUE	FALSE
cg00733385	chr7	150092826	150092827	LOC728743	728743	-4962	CGI-N-Shore	FALSE	TRUE	FALSE
cg00733493	chr7	45126655	45126656	NACAD	23148	1836	CGI-N-Shore	FALSE	TRUE	FALSE
cg00734567	chr1	86172782	86172783	ZNHIT6	54680	1332	CGI-N-Shore	FALSE	TRUE	FALSE
cg00734666	chr3	47454929	47454930	PTPN23	25930	32437	CGI-S-Shelf	TRUE	TRUE	FALSE
cg00734683	chr3	51982603	51982604	PARP3	10039	6241	Non-CGI	FALSE	TRUE	FALSE
cg00735329	chr18	74732603	74732604	MBP	4155	112169	CGI-S-Shelf	FALSE	TRUE	FALSE
cg00737264	chr6	169049498	169049499	SMOC2	64094	207666	CGI-N-Shore	FALSE	TRUE	FALSE
cg00739667	chr16	81731648	81731649	LOC100129617	100129617	32688	CGI	FALSE	TRUE	FALSE
cg00741695	chr6	961559	961560	LOC285768	285768	140006	Non-CGI	FALSE	TRUE	FALSE
cg00741945	chr16	89114669	89114670	ACSF3	197322	-45546	CGI	FALSE	TRUE	FALSE
cg00746446	chr2	23879137	23879138	ATAD2B	54454	270797	Non-CGI	FALSE	TRUE	FALSE
cg00748640	chr16	19886655	19886656	GPRC5B	51704	10175	CGI-S-Shelf	FALSE	TRUE	FALSE
cg00752045	chr17	2588136	2588137	CLUH	23277	26789	CGI	FALSE	TRUE	FALSE
cg00755588	chr9	139737793	139737794	C9orf172	389813	-1072	CGI-N-Shore	TRUE	FALSE	FALSE
cg00757262	chr17	17747898	17747899	SREBF1	6720	-7572	Non-CGI	FALSE	TRUE	FALSE
cg00758881	chr16	58534681	58534682	SETD6	79918	-14700	CGI-N-Shore	FALSE	TRUE	FALSE
cg00759301	chr1	82165110	82165111	LPHN2	23266	393264	Non-CGI	TRUE	TRUE	FALSE
cg00760014	chr1	19267827	19267828	IFFO2	126917	14997	Non-CGI	FALSE	TRUE	FALSE
cg00763594	chr1	15256054	15256055	TMEM51-AS1	200197	222904	Non-CGI	TRUE	TRUE	FALSE
cg00764217	chr7	116660240	116660241	ST7-AS1	93653	-65851	Non-CGI	TRUE	TRUE	FALSE
cg00765233	chr2	235877260	235877261	SH3BP4	23677	16631	Non-CGI	FALSE	TRUE	FALSE
cg00769161	chr12	58130183	58130184	AGAP2	116986	5759	CGI	FALSE	TRUE	FALSE
cg00770158	chr3	57134628	57134629	ARHGEF3	50650	-21291	CGI-S-Shelf	FALSE	TRUE	FALSE
cg00771346	chr3	69230212	69230213	LMOD3	56203	-58465	CGI	FALSE	TRUE	FALSE
cg00772991	chr2	220716794	220716795	MIR4268	100422959	54490	Non-CGI	FALSE	FALSE	TRUE
cg00776080	chr12	53442322	53442323	TENC1	23371	1511	CGI-S-Shore	TRUE	TRUE	FALSE
cg00779638	chr9	88355164	88355165	AGTPBP1	23287	1778	CGI-N-Shore	FALSE	TRUE	FALSE
cg00781658	chr19	41805850	41805851	CCDC97	90324	-10242	Non-CGI	FALSE	TRUE	FALSE
cg00784105	chr1	19636065	19636066	AKR7A2	8574	2573	CGI-N-Shelf	FALSE	TRUE	FALSE
cg00786406	chr1	114474389	114474390	HIPK1	204851	2392	CGI-S-Shore	FALSE	TRUE	FALSE
cg00786909	chr1	227163427	227163428	ADCK3	56997	78837	CGI-N-Shore	TRUE	TRUE	FALSE
cg00787780	chr6	64151745	64151746	PTP4A1	7803	-79904	CGI-N-Shore	FALSE	FALSE	TRUE
cg00793543	chr19	3650029	3650030	CACTIN	58509	-23215	CGI-S-Shore	FALSE	TRUE	FALSE
cg00797102	chr17	68168184	68168185	KCNJ2-AS1	400617	-2640	CGI-S-Shore	FALSE	TRUE	FALSE
cg00797286	chr14	69621625	69621626	DCAF5	8816	-1710	CGI-S-Shore	TRUE	FALSE	FALSE
cg00798431	chr5	128337585	128337586	SLC27A6	28965	36374	Non-CGI	FALSE	TRUE	FALSE
cg00799984	chr8	134307105	134307106	NDRG1	10397	2440	CGI-N-Shore	FALSE	TRUE	FALSE
cg00804078	chr6	110736941	110736942	DDO	8528	-187	Non-CGI	TRUE	FALSE	FALSE
cg00804179	chr3	13083974	13083975	IQSEC1	9922	30641	CGI-S-Shore	FALSE	TRUE	FALSE
cg00805577	chr12	123333205	123333206	HIP1R	9026	13909	CGI	FALSE	TRUE	FALSE
cg00805619	chr10	134420623	134420624	INPP5A	3632	69269	CGI	TRUE	TRUE	FALSE
cg00806214	chr16	521912	521913	RAB11FIP3	9727	46243	CGI-N-Shore	FALSE	TRUE	FALSE
cg00806239	chr6	43456984	43456985	TJAP1	93643	11722	Non-CGI	TRUE	TRUE	FALSE
cg00806727	chr14	91592462	91592463	SNORA11B	100124539	-306	Non-CGI	TRUE	TRUE	FALSE
cg00810607	chr1	224544471	224544472	CNIH4	29097	-122	CGI-N-Shore	TRUE	FALSE	FALSE
cg00813603	chr19	19175730	19175731	SLC25A42	284439	926	CGI-S-Shore	FALSE	TRUE	FALSE
cg00814751	chr5	176072170	176072171	TSPAN17	26262	-2216	CGI-N-Shore	FALSE	TRUE	FALSE
cg00815519	chr1	228341886	228341887	GJC2	57165	4470	CGI-N-Shelf	FALSE	TRUE	FALSE
cg00817377	chr7	73441057	73441058	ELN	2006	-1368	CGI-N-Shore	TRUE	FALSE	FALSE
cg00817501	chr4	138440719	138440720	PCDH18	54510	12927	Non-CGI	FALSE	TRUE	FALSE
cg00818680	chr16	68881254	68881255	TANGO6	79613	3744	CGI-S-Shelf	FALSE	TRUE	FALSE
cg00821600	chr2	142889384	142889385	LRP1B	53353	-113	CGI-S-Shore	TRUE	FALSE	FALSE
cg00824381	chr16	31708460	31708461	CLUHP3	100132341	-3472	CGI-N-Shelf	FALSE	FALSE	TRUE
cg00830252	chr12	16039824	16039825	STRAP	11171	4535	CGI-S-Shelf	FALSE	TRUE	FALSE
cg00830492	chr7	47432311	47432312	TNS3	64759	189429	Non-CGI	FALSE	TRUE	FALSE
cg00830813	chr7	984874	984875	ADAP1	11033	30359	CGI-N-Shore	FALSE	TRUE	FALSE
cg00832924	chr7	117449060	117449061	CTTNBP2	83992	64499	Non-CGI	FALSE	TRUE	FALSE
cg00834223	chr2	236944951	236944952	GBX2	2637	131699	CGI	TRUE	TRUE	FALSE
cg00837398	chr7	148958537	148958538	ZNF783	100289678	-723	CGI-N-Shore	TRUE	FALSE	FALSE
cg00837812	chr7	138665354	138665355	KIAA1549	57670	708	CGI-N-Shore	FALSE	TRUE	FALSE
cg00839132	chr18	74692235	74692236	MBP	4155	152537	CGI	TRUE	TRUE	FALSE
cg00842076	chr14	89881835	89881836	FOXN3-AS1	400236	-1861	CGI-N-Shore	TRUE	TRUE	FALSE
cg00842687	chr3	73816009	73816010	PDZRN3	23024	-141936	Non-CGI	FALSE	FALSE	TRUE
cg00846036	chr11	84634126	84634127	DLG2	1740	704186	Non-CGI	TRUE	TRUE	FALSE
cg00849365	chr16	5074999	5075000	NAGPA-AS1	100507589	-8702	CGI-N-Shelf	FALSE	TRUE	FALSE
cg00849854	chr17	17780937	17780938	SREBF1	6720	-40611	Non-CGI	FALSE	TRUE	FALSE
cg00850552	chr21	46236351	46236352	SUMO3	6612	1691	CGI-N-Shore	FALSE	TRUE	FALSE
cg00852595	chr12	99548437	99548438	FAM71C	196472	-493089	Non-CGI	TRUE	TRUE	FALSE
cg00854273	chr17	75959756	75959757	TNRC6C	57690	-40560	CGI-S-Shelf	FALSE	FALSE	TRUE
cg00854324	chr16	69941269	69941270	MIR140	406932	-25713	Non-CGI	FALSE	TRUE	FALSE
cg00858483	chr12	123238275	123238276	DENR	8562	903	CGI-S-Shore	FALSE	TRUE	FALSE
cg00859314	chr19	46147548	46147549	EML2	24139	1225	CGI-S-Shore	TRUE	TRUE	FALSE
cg00863306	chr19	13991470	13991471	NANOS3	342977	3406	CGI-S-Shore	FALSE	TRUE	FALSE
cg00863378	chr16	56549757	56549758	BBS2	583	4249	CGI-N-Shelf	FALSE	TRUE	FALSE
cg00863469	chr19	49116423	49116424	FAM83E	54854	269	CGI	TRUE	FALSE	FALSE
cg00864618	chr8	141518479	141518480	CHRAC1	54108	-2916	CGI-N-Shelf	FALSE	FALSE	TRUE
cg00864691	chr16	84986179	84986180	ZDHHC7	55625	58960	CGI-N-Shore	FALSE	FALSE	TRUE
cg00865973	chr4	102709336	102709337	BANK1	55024	368217	CGI-N-Shelf	FALSE	TRUE	FALSE
cg00867510	chr2	239930488	239930489	MIR4440	100616397	60120	CGI-N-Shore	FALSE	FALSE	TRUE
cg00869796	chr3	107141260	107141261	CCDC54	84692	45071	Non-CGI	FALSE	FALSE	TRUE
cg00871129	chr20	44176425	44176426	EPPIN-WFDC6	100526773	-359	Non-CGI	TRUE	FALSE	FALSE
cg00871371	chr17	75371476	75371477	MIR4316	100422851	21658	CGI-S-Shore	TRUE	TRUE	FALSE
cg00872256	chr7	23243417	23243418	NUPL2	11097	21970	CGI-N-Shelf	FALSE	FALSE	TRUE
cg00873953	chr12	95010048	95010049	TMCC3	57458	34274	Non-CGI	TRUE	TRUE	FALSE
cg00874605	chr16	14569598	14569599	PARN	5073	154528	Non-CGI	FALSE	TRUE	FALSE
cg00875382	chr4	103542236	103542237	NFKB1	4790	119749	Non-CGI	FALSE	FALSE	TRUE
cg00875476	chr10	134521848	134521849	NKX6-2	84504	77687	CGI	FALSE	TRUE	FALSE
cg00876376	chr1	45096728	45096729	TMEM53	79639	43369	CGI-N-Shore	TRUE	TRUE	FALSE
cg00879786	chr2	240239755	240239756	MIR4269	100423043	12597	CGI	FALSE	TRUE	FALSE
cg00885918	chr20	30406997	30406998	MYLK2	85366	-179	CGI-N-Shelf	TRUE	FALSE	FALSE
cg00886598	chr5	42812844	42812845	SEPP1	6414	13152	CGI-N-Shore	TRUE	TRUE	FALSE
cg00890916	chr20	30158833	30158834	PSIMCT-1	100101490	23647	CGI-N-Shore	FALSE	FALSE	TRUE
cg00891184	chr1	10272185	10272186	KIF1B	23095	1420	CGI-S-Shore	FALSE	TRUE	FALSE
cg00895132	chr3	13318410	13318411	NUP210	23225	143397	Non-CGI	FALSE	FALSE	TRUE
cg00895196	chr6	22147182	22147183	LOC729177	729177	238	CGI	TRUE	TRUE	FALSE
cg00898274	chr10	88448035	88448036	LDB3	11155	21483	Non-CGI	FALSE	TRUE	FALSE
cg00898447	chr16	75300795	75300796	BCAR1	9564	1154	CGI-S-Shore	TRUE	TRUE	FALSE
cg00900226	chr4	15161468	15161469	CPEB2	132864	157169	Non-CGI	FALSE	FALSE	TRUE
cg00900231	chr16	50897271	50897272	CYLD	1540	121309	Non-CGI	FALSE	FALSE	TRUE
cg00901982	chr2	70257298	70257299	PCBP1-AS1	400960	56847	Non-CGI	FALSE	TRUE	FALSE
cg00906420	chr3	78917133	78917134	ROBO1	6091	899924	Non-CGI	FALSE	TRUE	FALSE
cg00907267	chr12	56474771	56474772	ERBB3	2065	961	CGI-S-Shore	FALSE	TRUE	FALSE
cg00909286	chr3	149889135	149889136	LOC646903	646903	200068	Non-CGI	FALSE	FALSE	TRUE
cg00909401	chr2	43328657	43328658	ZFP36L2	678	125086	CGI-S-Shore	FALSE	FALSE	TRUE
cg00912580	chr2	135169533	135169534	MGAT5	4249	157702	Non-CGI	FALSE	TRUE	FALSE
cg00912946	chr1	156019986	156019987	UBQLN4	56893	3528	CGI-N-Shelf	FALSE	TRUE	FALSE
cg00919280	chr12	41370320	41370321	PDZRN4	29951	-211928	Non-CGI	FALSE	TRUE	FALSE
cg00921160	chr14	97129452	97129453	VRK1	7443	-134230	CGI	FALSE	FALSE	TRUE
cg00921682	chr19	42081255	42081256	CEACAM21	90273	25368	Non-CGI	TRUE	TRUE	FALSE
cg00924265	chr8	28258117	28258118	PNOC	5368	83467	CGI-N-Shore	FALSE	TRUE	FALSE
cg00932510	chr22	30782804	30782805	RNF215	200312	496	CGI-N-Shore	TRUE	TRUE	FALSE
cg00933835	chr2	3705271	3705272	ALLC	55821	-513	CGI-S-Shore	TRUE	FALSE	FALSE
cg00934120	chr8	144467828	144467829	RHPN1	114822	16802	CGI	FALSE	FALSE	TRUE
cg00934322	chr6	30854109	30854110	DDR1	780	3414	CGI-S-Shore	FALSE	TRUE	FALSE
cg00934987	chr17	56605468	56605469	MTMR4	9110	-10216	CGI-N-Shelf	TRUE	TRUE	FALSE
cg00936790	chr8	29027844	29027845	KIF13B	23303	92764	Non-CGI	FALSE	TRUE	FALSE
cg00937286	chr8	136245114	136245115	LOC286094	286094	-1258	Non-CGI	TRUE	FALSE	FALSE
cg00939442	chr1	223183895	223183896	TLR5	7100	132727	Non-CGI	FALSE	FALSE	TRUE
cg00940248	chr16	81929358	81929359	SDR42E1	93517	115733	CGI-N-Shore	FALSE	TRUE	FALSE
cg00943384	chr15	98064827	98064828	LOC91948	91948	352830	CGI-N-Shore	FALSE	FALSE	TRUE
cg00943585	chr6	170572016	170572017	LOC154449	154449	-358	CGI-S-Shore	TRUE	FALSE	FALSE
cg00946535	chr17	73632574	73632575	SMIM5	643008	3059	Non-CGI	FALSE	TRUE	FALSE
cg00947319	chr17	47005597	47005598	SNF8	11267	16555	Non-CGI	FALSE	TRUE	FALSE
cg00948250	chr1	160038302	160038303	KCNJ10	3766	1747	CGI-N-Shore	FALSE	TRUE	FALSE
cg00949532	chr8	6456854	6456855	ANGPT2	285	-36069	CGI-S-Shore	FALSE	TRUE	FALSE
cg00950343	chr5	111312498	111312499	NREP	9315	128	Non-CGI	TRUE	FALSE	FALSE
cg00950497	chr10	116393423	116393424	ABLIM1	3983	134594	CGI-S-Shore	TRUE	TRUE	FALSE
cg00950947	chr10	653567	653568	PRR26	414235	-42319	CGI-S-Shore	FALSE	TRUE	FALSE
cg00952642	chr8	141537134	141537135	CHRAC1	54108	15736	CGI	TRUE	FALSE	FALSE
cg00958225	chr1	44972477	44972478	RNF220	55182	101516	Non-CGI	FALSE	TRUE	FALSE
cg00959616	chr12	128866668	128866669	MIR3612	100500817	88030	CGI-S-Shore	FALSE	TRUE	FALSE
cg00960138	chr6	41668804	41668805	TFEB	7942	35191	Non-CGI	FALSE	TRUE	FALSE
cg00962984	chr16	56150071	56150072	LOC283856	283856	74933	Non-CGI	FALSE	TRUE	FALSE
cg00963786	chr16	69830352	69830353	WWP2	11060	34077	CGI	FALSE	TRUE	FALSE
cg00966405	chr7	5535748	5535749	MIR589	693174	-199	CGI-S-Shore	TRUE	TRUE	FALSE
cg00966925	chr22	38476308	38476309	SLC16A8	23539	2860	CGI-N-Shore	FALSE	TRUE	FALSE
cg00973115	chr14	105965156	105965157	C14orf80	283643	8963	CGI	FALSE	TRUE	FALSE
cg00973876	chr17	77899208	77899209	CBX4	8535	-85994	CGI-N-Shore	FALSE	FALSE	TRUE
cg00974578	chr6	143916485	143916486	PHACTR2	9749	-12830	Non-CGI	FALSE	FALSE	TRUE
cg00975680	chr1	229618011	229618012	NUP133	55746	26075	Non-CGI	FALSE	TRUE	FALSE
cg00975971	chr5	14744206	14744207	FAM105B	90268	79422	Non-CGI	FALSE	TRUE	FALSE
cg00977978	chr7	139409421	139409422	HIPK2	28996	68270	Non-CGI	FALSE	TRUE	FALSE
cg00978505	chr1	65728475	65728476	DNAJC6	9829	8326	CGI-N-Shelf	TRUE	TRUE	FALSE
cg00978855	chr8	28928948	28928949	HMBOX1	79618	181036	CGI-N-Shore	FALSE	TRUE	FALSE
cg00981877	chr20	50366841	50366842	ATP9A	10079	18065	Non-CGI	FALSE	TRUE	FALSE
cg00982799	chr10	129868087	129868088	MKI67	4288	56379	CGI	FALSE	TRUE	FALSE
cg00982984	chr15	45493530	45493531	SHF	90525	-156	CGI-S-Shore	TRUE	FALSE	FALSE
cg00985388	chr3	183952212	183952213	VWA5B2	90113	3894	CGI-S-Shelf	TRUE	TRUE	FALSE
cg00985960	chr18	32817327	32817328	ZNF397	84307	-3665	CGI-N-Shelf	FALSE	FALSE	TRUE
cg00986742	chr1	165513318	165513319	LRRC52	440699	-158	Non-CGI	TRUE	TRUE	FALSE
cg00989315	chr7	21982818	21982819	CDCA7L	55536	2722	CGI-N-Shore	FALSE	TRUE	FALSE
cg00990385	chr12	113587690	113587691	CCDC42B	387885	26	CGI-N-Shelf	TRUE	FALSE	FALSE
cg00991994	chr3	99639553	99639554	MIR3921	100500859	43687	Non-CGI	FALSE	TRUE	FALSE
cg00994250	chr6	151087821	151087822	MTHFD1L	25902	-98992	Non-CGI	FALSE	TRUE	FALSE
cg00995141	chr2	18228497	18228498	KCNS3	3790	169382	Non-CGI	FALSE	FALSE	TRUE
cg00995324	chr7	139446195	139446196	HIPK2	28996	31496	Non-CGI	FALSE	TRUE	FALSE
cg00995893	chr13	45676585	45676586	GTF2F2	2963	-18044	Non-CGI	FALSE	FALSE	TRUE
cg00996053	chr1	48575385	48575386	SKINTL	391037	72713	Non-CGI	FALSE	TRUE	FALSE
cg00997054	chr3	32904291	32904292	TRIM71	131405	44780	Non-CGI	FALSE	TRUE	FALSE
cg00997853	chr12	26844579	26844580	ITPR2	3709	141550	Non-CGI	FALSE	TRUE	FALSE
cg00997998	chr14	65150074	65150075	PLEKHG3	26030	-21117	Non-CGI	FALSE	FALSE	TRUE
cg01001472	chr13	97947958	97947959	MBNL2	10150	73383	Non-CGI	FALSE	TRUE	FALSE
cg01008405	chr5	139039026	139039027	CXXC5	51523	10724	CGI-N-Shore	FALSE	TRUE	FALSE
cg01012026	chr7	229388	229389	FAM20C	56975	36418	CGI	TRUE	TRUE	FALSE
cg01012713	chr8	1960217	1960218	MYOM2	9172	-32939	CGI	FALSE	FALSE	TRUE
cg01014224	chr13	44379186	44379187	ENOX1	55068	-18069	Non-CGI	FALSE	FALSE	TRUE
cg01015175	chr11	112045641	112045642	BCO2	83875	-565	Non-CGI	TRUE	FALSE	FALSE
cg01016119	chr3	56835282	56835283	FAM208A	23272	-118146	CGI-N-Shore	FALSE	TRUE	FALSE
cg01019484	chr6	44499229	44499230	MIR4642	100616352	95850	Non-CGI	FALSE	FALSE	TRUE
cg01021631	chr1	56902689	56902690	PPAP2B	8613	142566	Non-CGI	FALSE	FALSE	TRUE
cg01024247	chr7	5535740	5535741	MIR589	693174	-191	CGI-S-Shore	TRUE	TRUE	FALSE
cg01026796	chr5	54602543	54602544	DHX29	54505	976	CGI-N-Shore	TRUE	TRUE	FALSE
cg01030404	chr16	84560950	84560951	KIAA1609	57707	-22661	CGI	FALSE	FALSE	TRUE
cg01031616	chr14	100597168	100597169	DEGS2	123099	28842	Non-CGI	FALSE	TRUE	FALSE
cg01031983	chr3	126066447	126066448	KLF15	28999	9787	CGI-S-Shelf	FALSE	TRUE	FALSE
cg01032851	chr16	68994912	68994913	TANGO6	79613	117402	Non-CGI	FALSE	TRUE	FALSE
cg01034993	chr15	68992751	68992752	MIR4312	100422971	101511	Non-CGI	FALSE	TRUE	FALSE
cg01040786	chr5	78043895	78043896	LHFPL2	10184	-99246	Non-CGI	FALSE	FALSE	TRUE
cg01041405	chr16	68440620	68440621	SMPD3	55512	41787	Non-CGI	FALSE	TRUE	FALSE
cg01041717	chr13	107009062	107009063	LINC00460	728192	-19847	Non-CGI	FALSE	FALSE	TRUE
cg01043196	chr16	68362223	68362224	PRMT7	54496	17345	Non-CGI	FALSE	TRUE	FALSE
cg01044465	chr19	42914685	42914686	LIPE	3991	16891	CGI	FALSE	TRUE	FALSE
cg01044662	chr2	75938360	75938361	GCFC2	6936	-248	CGI	TRUE	FALSE	FALSE
cg01045354	chr16	73925248	73925249	PSMD7	5713	-405423	Non-CGI	FALSE	FALSE	TRUE
cg01045835	chr5	82969530	82969531	HAPLN1	1404	47364	Non-CGI	TRUE	TRUE	FALSE
cg01046070	chr16	74730199	74730200	MLKL	197259	4588	CGI-N-Shelf	FALSE	TRUE	FALSE
cg01049870	chr14	95601239	95601240	MIR3173	100422981	3082	Non-CGI	TRUE	TRUE	FALSE
cg01051098	chr14	55604454	55604455	LGALS3	3958	8518	Non-CGI	FALSE	TRUE	FALSE
cg01052291	chr6	133036573	133036574	VNN1	8876	-1378	Non-CGI	TRUE	FALSE	FALSE
cg01052636	chr4	645440	645441	MYL5	4636	-21927	CGI	TRUE	TRUE	FALSE
cg01054110	chr12	125002332	125002333	NCOR2	9612	49676	CGI	FALSE	TRUE	FALSE
cg01055099	chr16	3516099	3516100	NAA60	79903	22430	CGI	FALSE	TRUE	FALSE
cg01055868	chr3	71307284	71307285	MIR1284	100302112	283954	Non-CGI	FALSE	TRUE	FALSE
cg01056400	chr2	208119426	208119427	KLF7	8609	-87854	Non-CGI	FALSE	FALSE	TRUE
cg01057132	chr5	169190508	169190509	DOCK2	1794	126256	Non-CGI	FALSE	TRUE	FALSE
cg01057287	chr16	27714680	27714681	KIAA0556	23247	153211	Non-CGI	FALSE	TRUE	FALSE
cg01059881	chr20	60927922	60927923	LAMA5	3911	14444	CGI-S-Shore	FALSE	TRUE	FALSE
cg01062942	chr19	15568935	15568936	RASAL3	64926	6445	CGI	FALSE	TRUE	FALSE
cg01068601	chr16	67918699	67918700	NRN1L	123904	-80	Non-CGI	TRUE	FALSE	FALSE
cg01068808	chr1	184007101	184007102	GLT25D2	23127	-222	CGI-S-Shore	TRUE	FALSE	FALSE
cg01070987	chr3	149687002	149687003	PFN2	5217	1737	CGI-N-Shore	FALSE	TRUE	FALSE
cg01071185	chr1	209629286	209629287	MIR205	406988	23807	Non-CGI	FALSE	FALSE	TRUE
cg01072388	chr16	85620244	85620245	GSE1	23199	-24783	CGI	FALSE	FALSE	TRUE
cg01072936	chr10	45481854	45481855	C10orf10	11067	-7523	Non-CGI	FALSE	TRUE	FALSE
cg01075553	chr13	113733117	113733118	F7	2155	-26986	CGI	FALSE	TRUE	FALSE
cg01075918	chr18	9912834	9912835	VAPA	9218	-1119	CGI-N-Shore	TRUE	FALSE	FALSE
cg01078048	chr11	46935970	46935971	LRP4	4038	4201	CGI-N-Shelf	FALSE	TRUE	FALSE
cg01079060	chr7	139437439	139437440	HIPK2	28996	40252	Non-CGI	FALSE	TRUE	FALSE
cg01081737	chr8	142238752	142238753	SLC45A4	57210	25471	CGI-S-Shore	TRUE	TRUE	FALSE
cg01081775	chr4	8158359	8158360	ABLIM2	84448	2198	CGI-N-Shore	FALSE	TRUE	FALSE
cg01081813	chr11	122581083	122581084	UBASH3B	84959	54684	Non-CGI	FALSE	TRUE	FALSE
cg01084154	chr1	20692892	20692893	LOC339505	339505	62393	CGI	FALSE	TRUE	FALSE
cg01084837	chr11	116881122	116881123	SIK3	23387	87869	Non-CGI	FALSE	TRUE	FALSE
cg01084990	chr16	65105581	65105582	CDH11	1009	50336	CGI	FALSE	TRUE	FALSE
cg01087463	chr3	15676638	15676639	BTD	686	33497	Non-CGI	FALSE	TRUE	FALSE
cg01087977	chr2	220150857	220150858	DNAJB2	3300	6816	Non-CGI	TRUE	TRUE	FALSE
cg01088404	chr12	48214523	48214524	HDAC7	51564	-759	CGI-S-Shore	TRUE	FALSE	FALSE
cg01092932	chr1	198828060	198828061	MIR181B1	406955	49	Non-CGI	TRUE	TRUE	FALSE
cg01093854	chr10	70362422	70362423	TET1	80312	42304	Non-CGI	FALSE	TRUE	FALSE
cg01094192	chr6	33158597	33158598	COL11A2	1302	1646	CGI-N-Shore	FALSE	TRUE	FALSE
cg01095004	chr16	88454883	88454884	ZNF469	84627	-38994	CGI-S-Shore	FALSE	FALSE	TRUE
cg01095658	chr14	68036318	68036319	PIGH	5283	30697	Non-CGI	TRUE	TRUE	FALSE
cg01098939	chr7	2742274	2742275	AMZ1	155185	23110	CGI-S-Shore	TRUE	TRUE	FALSE
cg01102073	chr3	128204813	128204814	GATA2	2624	7215	CGI-N-Shore	FALSE	TRUE	FALSE
cg01104306	chr11	4066205	4066206	RRM1	6240	-49717	Non-CGI	FALSE	TRUE	FALSE
cg01105418	chr1	244214593	244214594	ZBTB18	10472	31	CGI-S-Shore	TRUE	FALSE	FALSE
cg01106989	chr6	52858459	52858460	GSTA4	2941	1717	CGI-N-Shore	TRUE	TRUE	FALSE
cg01109734	chr2	795156	795157	LOC339822	339822	68954	CGI	FALSE	TRUE	FALSE
cg01111006	chr6	11161658	11161659	ERVFRD-1	405754	-49586	Non-CGI	FALSE	FALSE	TRUE
cg01111041	chr6	32121055	32121056	PPT2	9374	-172	CGI	TRUE	TRUE	FALSE
cg01112778	chr5	146460987	146460988	PPP2R2B	5521	65	Non-CGI	TRUE	FALSE	FALSE
cg01113900	chr3	69925279	69925280	MITF	4286	136692	Non-CGI	TRUE	TRUE	FALSE
cg01114124	chr2	240171748	240171749	MGC16025	85009	-54594	CGI	FALSE	TRUE	FALSE
cg01116568	chr11	10476529	10476530	AMPD3	272	4660	CGI-S-Shelf	TRUE	TRUE	FALSE
cg01119686	chr3	13318911	13318912	NUP210	23225	142896	Non-CGI	FALSE	FALSE	TRUE
cg01124523	chr4	26578317	26578318	TBC1D19	55296	-7227	Non-CGI	FALSE	FALSE	TRUE
cg01126576	chr10	120949145	120949146	PRDX3	10935	-10799	Non-CGI	FALSE	FALSE	TRUE
cg01132150	chr5	131782489	131782490	C5orf56	441108	36023	Non-CGI	FALSE	TRUE	FALSE
cg01135464	chr17	48971001	48971002	TOB1	10140	-25661	CGI	FALSE	FALSE	TRUE
cg01135781	chr5	177396838	177396839	PROP1	5626	26403	CGI-N-Shore	FALSE	FALSE	TRUE
cg01136606	chr8	141535901	141535902	CHRAC1	54108	14503	CGI	TRUE	FALSE	FALSE
cg01138171	chr2	131724244	131724245	ARHGEF4	50649	51457	CGI-S-Shore	FALSE	TRUE	FALSE
cg01138819	chr5	171055226	171055227	FGF18	8817	208558	CGI-N-Shore	FALSE	FALSE	TRUE
cg01139586	chr14	90798784	90798785	NRDE2	55051	-302	CGI-S-Shore	TRUE	FALSE	FALSE
cg01140244	chr10	134498960	134498961	NKX6-2	84504	100575	CGI	FALSE	TRUE	FALSE
cg01143068	chr15	42888179	42888180	STARD9	57519	20321	Non-CGI	FALSE	TRUE	FALSE
cg01143426	chr1	43812393	43812394	MPL	4352	8917	CGI-N-Shore	FALSE	TRUE	FALSE
cg01143938	chr22	48606263	48606264	MIR3201	100422916	-63911	CGI-S-Shore	FALSE	FALSE	TRUE
cg01144965	chr8	1811760	1811761	ARHGEF10	9639	39610	CGI	FALSE	TRUE	FALSE
cg01145245	chr16	20871117	20871118	LYRM1	57149	-40438	Non-CGI	FALSE	TRUE	FALSE
cg01145653	chr3	125775696	125775697	SLC41A3	54946	44693	Non-CGI	TRUE	TRUE	FALSE
cg01145903	chr5	115697588	115697589	SEMA6A	57556	212961	CGI-S-Shore	FALSE	FALSE	TRUE
cg01146928	chr22	46455670	46455671	C22orf26	55267	-5645	CGI-N-Shore	TRUE	TRUE	FALSE
cg01149239	chr3	196746085	196746086	MFI2	4241	10600	Non-CGI	FALSE	TRUE	FALSE
cg01151029	chr16	76342377	76342378	CNTNAP4	85445	31200	Non-CGI	TRUE	TRUE	FALSE
cg01152025	chr9	15305873	15305874	TTC39B	158219	1483	CGI-N-Shore	FALSE	TRUE	FALSE
cg01153385	chr12	115874926	115874927	MIR620	693205	711531	Non-CGI	FALSE	FALSE	TRUE
cg01154283	chr2	36603543	36603544	CRIM1	51232	20172	Non-CGI	FALSE	TRUE	FALSE
cg01154527	chr6	151661849	151661850	ZBTB2	57621	50826	CGI-N-Shore	TRUE	TRUE	FALSE
cg01156295	chr5	138211184	138211185	LRRTM2	26045	-126	Non-CGI	TRUE	TRUE	FALSE
cg01157004	chr3	177256538	177256539	TBL1XR1	79718	-341489	Non-CGI	FALSE	FALSE	TRUE
cg01158079	chr17	79086430	79086431	MIR657	724027	12741	CGI	FALSE	TRUE	FALSE
cg01158469	chr16	69832831	69832832	WWP2	11060	36556	CGI-S-Shelf	FALSE	TRUE	FALSE
cg01160855	chr2	56227870	56227871	MIR216B	100126319	58	Non-CGI	TRUE	TRUE	FALSE
cg01164584	chr8	67454340	67454341	C8orf46	254778	48848	CGI-N-Shore	FALSE	FALSE	TRUE
cg01166876	chr2	36018275	36018276	LOC100288911	100288911	564436	Non-CGI	FALSE	FALSE	TRUE
cg01166892	chr16	85320882	85320883	LINC00311	197196	4317	CGI-S-Shore	FALSE	TRUE	FALSE
cg01168339	chr12	120935726	120935727	LOC100506668	100506668	-1976	CGI-S-Shore	TRUE	TRUE	FALSE
cg01168584	chr18	2903245	2903246	LOC727896	727896	43374	CGI-N-Shelf	FALSE	TRUE	FALSE
cg01168776	chr1	212002499	212002500	LPGAT1	9926	1613	CGI-N-Shore	FALSE	TRUE	FALSE
cg01170247	chr10	134528551	134528552	NKX6-2	84504	70984	CGI-S-Shore	FALSE	TRUE	FALSE
cg01172419	chr16	1159092	1159093	C1QTNF8	390664	-12847	CGI-S-Shore	FALSE	FALSE	TRUE
cg01173432	chr3	71622662	71622663	FOXP1	27086	10476	Non-CGI	TRUE	TRUE	FALSE
cg01174811	chr5	58882939	58882940	PART1	25859	-900599	Non-CGI	TRUE	TRUE	FALSE
cg01178070	chr10	20132333	20132334	PLXDC2	84898	26960	Non-CGI	FALSE	TRUE	FALSE
cg01178188	chr11	61523045	61523046	DKFZP434K028	26070	2089	CGI-S-Shelf	FALSE	TRUE	FALSE
cg01179320	chr15	31428597	31428598	TRPM1	4308	24877	Non-CGI	FALSE	TRUE	FALSE
cg01182895	chr10	13512177	13512178	BEND7	222389	32797	CGI-N-Shore	FALSE	TRUE	FALSE
cg01188509	chr6	160509295	160509296	LOC729603	729603	-4817	CGI-N-Shelf	FALSE	TRUE	FALSE
cg01189606	chr3	48471901	48471902	PLXNB1	5364	-440	CGI-S-Shore	TRUE	FALSE	FALSE
cg01192051	chr15	89879515	89879516	POLG	5428	-1488	CGI-S-Shore	TRUE	FALSE	FALSE
cg01192748	chr3	183145151	183145152	MCF2L2	23101	702	CGI-N-Shore	FALSE	TRUE	FALSE
cg01194320	chr16	50493166	50493167	NKD1	85407	-89073	Non-CGI	FALSE	FALSE	TRUE
cg01195564	chr5	73463484	73463485	HEXB	3074	-472362	Non-CGI	FALSE	FALSE	TRUE
cg01198184	chr14	103433908	103433909	AMN	81693	44914	CGI	FALSE	TRUE	FALSE
cg01199408	chr11	10672625	10672626	MRVI1	10335	42908	Non-CGI	FALSE	TRUE	FALSE
cg01200344	chr6	134943753	134943754	LOC154092	154092	184898	Non-CGI	FALSE	FALSE	TRUE
cg01201215	chr5	151137430	151137431	ATOX1	475	778	CGI-N-Shore	TRUE	TRUE	FALSE
cg01206378	chr1	95698827	95698828	RWDD3	25950	-882	CGI-N-Shore	TRUE	TRUE	FALSE
cg01207650	chr16	970818	970819	LMF1	64788	60498	CGI-S-Shore	FALSE	TRUE	FALSE
cg01207684	chr16	4103167	4103168	ADCY9	115	63017	CGI	FALSE	TRUE	FALSE
cg01208787	chr7	29526309	29526310	PRR15	222171	-77116	Non-CGI	FALSE	TRUE	FALSE
cg01213599	chr10	126704259	126704260	MIR4296	100423041	17178	CGI	FALSE	TRUE	FALSE
cg01214061	chr4	174290520	174290521	SAP30	8819	-1571	CGI-N-Shore	TRUE	FALSE	FALSE
cg01215742	chr16	1069551	1069552	SOX8	30812	37742	CGI	FALSE	FALSE	TRUE
cg01216497	chr13	112074910	112074911	TEX29	121793	101894	CGI-N-Shore	FALSE	FALSE	TRUE
cg01218206	chr11	116933977	116933978	SIK3	23387	35014	Non-CGI	FALSE	TRUE	FALSE
cg01219205	chr1	33937433	33937434	ZSCAN20	7579	-797	CGI-N-Shore	TRUE	FALSE	FALSE
cg01220822	chr9	139407979	139407980	MIR4673	100616242	6097	CGI-S-Shore	TRUE	TRUE	FALSE
cg01222298	chr17	61214305	61214306	TANC2	26115	127406	Non-CGI	FALSE	TRUE	FALSE
cg01222719	chr9	98276640	98276641	PTCH1	5727	2605	CGI-S-Shore	FALSE	TRUE	FALSE
cg01231009	chr8	130641185	130641186	GSDMC	56169	157947	Non-CGI	FALSE	FALSE	TRUE
cg01231125	chr3	23632110	23632111	UBE2E1	7324	-215272	Non-CGI	FALSE	TRUE	FALSE
cg01231381	chr2	180130081	180130082	SESTD1	91404	-730	CGI-S-Shore	TRUE	FALSE	FALSE
cg01233968	chr10	653335	653336	PRR26	414235	-42551	CGI-S-Shore	FALSE	TRUE	FALSE
cg01234420	chr22	46453808	46453809	C22orf26	55267	-3783	CGI-S-Shelf	TRUE	TRUE	FALSE
cg01234984	chr7	101849473	101849474	SH2B2	10603	-78930	CGI	FALSE	TRUE	FALSE
cg01236734	chr7	95050561	95050562	PON2	5445	13821	Non-CGI	FALSE	TRUE	FALSE
cg01240724	chr10	123298577	123298578	FGFR2	2263	59393	Non-CGI	FALSE	TRUE	FALSE
cg01240823	chr15	92667819	92667820	ST8SIA2	8128	-269319	Non-CGI	FALSE	TRUE	FALSE
cg01242976	chr6	101839808	101839809	GRIK2	2898	-6859	CGI-N-Shore	TRUE	FALSE	FALSE
cg01242977	chr5	111071312	111071313	STARD4	134429	-223078	Non-CGI	FALSE	TRUE	FALSE
cg01244015	chr2	225266843	225266844	FAM124B	79843	-131	CGI	TRUE	FALSE	FALSE
cg01246398	chr3	123165872	123165873	ADCY5	111	1518	CGI-N-Shore	FALSE	TRUE	FALSE
cg01246617	chr5	53751493	53751494	HSPB3	8988	61	Non-CGI	TRUE	FALSE	FALSE
cg01250001	chr8	103758088	103758089	KLF10	7071	-90104	Non-CGI	FALSE	FALSE	TRUE
cg01250212	chr19	2650755	2650756	GNG7	2788	51989	CGI	FALSE	TRUE	FALSE
cg01252219	chr12	110302105	110302106	GLTP	51228	16186	Non-CGI	FALSE	TRUE	FALSE
cg01254719	chr20	57978234	57978235	EDN3	1908	102734	CGI-N-Shore	FALSE	FALSE	TRUE
cg01256260	chr21	43729657	43729658	TFF3	7033	6047	CGI	FALSE	FALSE	TRUE
cg01258503	chr2	114362443	114362444	DDX11L2	84771	-3289	CGI-S-Shore	FALSE	FALSE	TRUE
cg01259220	chr7	914964	914965	GET4	51608	23376	CGI-N-Shore	TRUE	TRUE	FALSE
cg01261194	chr1	3340124	3340125	ARHGEF16	27237	-31021	CGI-N-Shore	FALSE	TRUE	FALSE
cg01262865	chr16	75282094	75282095	BCAR1	9564	19855	CGI-N-Shelf	TRUE	TRUE	FALSE
cg01263942	chr10	695859	695860	PRR26	414235	-27	CGI-S-Shore	TRUE	TRUE	FALSE
cg01264729	chr16	14622974	14622975	PARN	5073	101152	CGI-N-Shelf	FALSE	TRUE	FALSE
cg01265068	chr13	52052945	52052946	INTS6	26512	-25669	Non-CGI	FALSE	FALSE	TRUE
cg01265531	chr11	1854174	1854175	SYT8	90019	5464	CGI	TRUE	TRUE	FALSE
cg01267165	chr16	11681599	11681600	LITAF	9516	-276	CGI-S-Shore	TRUE	FALSE	FALSE
cg01267532	chr18	76266372	76266373	SALL3	27164	-473901	CGI	FALSE	FALSE	TRUE
cg01268381	chr21	42219771	42219772	DSCAM	1826	-731	CGI-S-Shore	TRUE	FALSE	FALSE
cg01269795	chr6	26440101	26440102	BTN3A3	10384	-597	Non-CGI	TRUE	FALSE	FALSE
cg01276497	chr11	33723723	33723724	C11orf91	100131378	-1436	CGI-S-Shore	TRUE	FALSE	FALSE
cg01277072	chr10	1526103	1526104	ADARB2-AS1	642394	-42720	Non-CGI	FALSE	TRUE	FALSE
cg01277438	chr18	77158471	77158472	NFATC1	4772	2698	CGI-S-Shore	TRUE	TRUE	FALSE
cg01279418	chr16	89623374	89623375	RPL13	6137	-3689	CGI-N-Shore	FALSE	TRUE	FALSE
cg01280180	chr3	138047362	138047363	NME9	347736	1364	CGI-N-Shore	FALSE	TRUE	FALSE
cg01284289	chr12	66025635	66025636	HMGA2	8091	-191800	Non-CGI	FALSE	FALSE	TRUE
cg01287505	chr17	56607190	56607191	2004-09-01	5414	10987	CGI-N-Shore	TRUE	TRUE	FALSE
cg01289541	chr3	170282058	170282059	SLC7A14	57709	21803	Non-CGI	FALSE	TRUE	FALSE
cg01290153	chr19	55987415	55987416	ZNF628	89887	-282	CGI-N-Shore	TRUE	FALSE	FALSE
cg01292175	chr18	24445240	24445241	AQP4-AS1	147429	-30	CGI-S-Shore	TRUE	TRUE	FALSE
cg01292810	chr3	184241840	184241841	EPHB3	2049	-37745	CGI-N-Shore	FALSE	FALSE	TRUE
cg01294490	chr6	35656906	35656907	FKBP5	2289	39489	CGI-S-Shore	TRUE	TRUE	FALSE
cg01295999	chr3	174926334	174926335	MIR4789	100616395	-160993	Non-CGI	FALSE	TRUE	FALSE
cg01296705	chr5	175108269	175108270	HRH2	3274	23228	CGI-S-Shelf	TRUE	TRUE	FALSE
cg01297349	chr12	2049039	2049040	LOC100271702	100271702	-3296	CGI	FALSE	FALSE	TRUE
cg01298374	chr12	27768965	27768966	REP15	387849	-80461	Non-CGI	FALSE	TRUE	FALSE
cg01298514	chr6	43736807	43736808	VEGFA	7422	-1137	CGI-N-Shore	TRUE	FALSE	FALSE
cg01298945	chr14	73259435	73259436	DPF3	8110	101372	Non-CGI	FALSE	TRUE	FALSE
cg01301660	chr5	110886711	110886712	STARD4	134429	-38477	Non-CGI	FALSE	TRUE	FALSE
cg01301885	chr10	128258570	128258571	C10orf90	118611	100507	Non-CGI	FALSE	TRUE	FALSE
cg01304145	chr16	22296770	22296771	POLR3E	55718	-11969	Non-CGI	FALSE	TRUE	FALSE
cg01309141	chr20	17205850	17205851	PCSK2	5126	-900	CGI-N-Shore	TRUE	FALSE	FALSE
cg01309213	chr16	331821	331822	ARHGDIG	398	1214	CGI-S-Shore	TRUE	TRUE	FALSE
cg01310768	chr5	89823130	89823131	LYSMD3	116068	2269	CGI-N-Shore	FALSE	TRUE	FALSE
cg01311222	chr3	124776153	124776154	HEG1	57493	-1350	CGI-S-Shore	TRUE	FALSE	FALSE
cg01317029	chr3	184063497	184063498	FAM131A	131408	9779	Non-CGI	FALSE	TRUE	FALSE
cg01318461	chr1	12566060	12566061	SNORA59B	677882	-1238	Non-CGI	TRUE	TRUE	FALSE
cg01319323	chr9	131789189	131789190	SH3GLB2	56904	1388	CGI-N-Shore	FALSE	TRUE	FALSE
cg01320433	chr6	169630013	169630014	THBS2	7058	24122	CGI-S-Shore	FALSE	TRUE	FALSE
cg01320507	chr1	229440351	229440352	SPHAR	10638	221	Non-CGI	TRUE	TRUE	FALSE
cg01320579	chr17	75405842	75405843	MIR4316	100422851	-12705	Non-CGI	FALSE	TRUE	FALSE
cg01323274	chr16	50058066	50058067	CNEP1R1	255919	-1121	CGI-N-Shore	TRUE	FALSE	FALSE
cg01323371	chr3	179667823	179667824	PEX5L	51555	86692	Non-CGI	FALSE	TRUE	FALSE
cg01324702	chr5	138290007	138290008	LRRTM2	26045	-78949	Non-CGI	FALSE	TRUE	FALSE
cg01328444	chr6	155967739	155967740	NOX3	50508	-190701	Non-CGI	FALSE	FALSE	TRUE
cg01330290	chr3	151001014	151001015	P2RY14	9934	-4783	Non-CGI	FALSE	TRUE	FALSE
cg01330316	chr6	45914282	45914283	CLIC5	53405	133801	Non-CGI	FALSE	TRUE	FALSE
cg01331275	chr2	9908576	9908577	TAF1B	9014	-74993	Non-CGI	FALSE	FALSE	TRUE
cg01331810	chr7	86414302	86414303	GRM3	2913	141071	CGI-N-Shore	FALSE	TRUE	FALSE
cg01333242	chr13	30740197	30740198	KATNAL1	84056	141385	Non-CGI	FALSE	FALSE	TRUE
cg01335087	chr22	19950166	19950167	MIR4761	100616414	-1108	CGI-S-Shelf	TRUE	TRUE	FALSE
cg01341751	chr17	38249486	38249487	NR1D1	9572	7485	CGI	FALSE	TRUE	FALSE
cg01343363	chr16	58533808	58533809	SETD6	79918	-15573	CGI-N-Shore	TRUE	TRUE	FALSE
cg01347048	chr10	104387773	104387774	TRIM8	81603	-16477	Non-CGI	FALSE	TRUE	FALSE
cg01354782	chr12	26522758	26522759	SSPN	8082	174488	Non-CGI	FALSE	TRUE	FALSE
cg01354879	chr6	84140050	84140051	ME1	4199	886	CGI-N-Shore	FALSE	TRUE	FALSE
cg01355757	chr2	74272773	74272774	TET3	200424	-675	Non-CGI	TRUE	FALSE	FALSE
cg01355932	chr8	982926	982927	LOC286083	286083	267899	CGI-S-Shore	FALSE	TRUE	FALSE
cg01359676	chr6	33163760	33163761	COL11A2	1302	-3514	CGI-S-Shelf	FALSE	TRUE	FALSE
cg01360333	chr15	65826759	65826760	PTPLAD1	51495	3931	CGI-S-Shelf	FALSE	TRUE	FALSE
cg01360605	chr20	58983676	58983677	MIR4533	100616362	-69491	CGI-N-Shore	FALSE	TRUE	FALSE
cg01362754	chr8	143397718	143397719	TSNARE1	203062	86823	CGI-S-Shore	FALSE	TRUE	FALSE
cg01363736	chr20	37172289	37172290	ADIG	149685	-37547	Non-CGI	FALSE	TRUE	FALSE
cg01367322	chr6	33283796	33283797	TAPBP	6892	-1631	CGI-S-Shore	TRUE	TRUE	FALSE
cg01368217	chr10	127836603	127836604	ADAM12	8038	240522	Non-CGI	FALSE	TRUE	FALSE
cg01368900	chr3	13113959	13113960	IQSEC1	9922	656	CGI-N-Shore	FALSE	TRUE	FALSE
cg01369479	chr2	134532341	134532342	NCKAP5	344148	-206309	Non-CGI	FALSE	FALSE	TRUE
cg01369689	chr16	30786529	30786530	ZNF629	23361	11992	CGI-N-Shore	FALSE	TRUE	FALSE
cg01375262	chr16	73266785	73266786	HTA	283902	140536	CGI	FALSE	FALSE	TRUE
cg01377268	chr2	239925497	239925498	MIR4440	100616397	65111	CGI-N-Shore	FALSE	FALSE	TRUE
cg01378062	chr3	88961910	88961911	EPHA3	2042	-194762	Non-CGI	FALSE	FALSE	TRUE
cg01378515	chr3	124773106	124773107	HEG1	57493	1694	CGI-N-Shore	FALSE	TRUE	FALSE
cg01380884	chr15	74923934	74923935	CLK3	1198	23220	Non-CGI	FALSE	TRUE	FALSE
cg01380922	chr3	64008387	64008388	PSMD6	9861	1269	CGI	TRUE	TRUE	FALSE
cg01383440	chr13	114203974	114203975	TFDP1	7027	-35027	CGI	FALSE	TRUE	FALSE
cg01385327	chr10	123356336	123356337	FGFR2	2263	1634	CGI-S-Shore	TRUE	TRUE	FALSE
cg01385708	chr16	4373570	4373571	GLIS2	84662	-8644	Non-CGI	FALSE	FALSE	TRUE
cg01387771	chr16	1036944	1036945	SOX8	30812	5135	CGI-S-Shore	FALSE	TRUE	FALSE
cg01395754	chr2	178408388	178408389	TTC30B	150737	9134	Non-CGI	FALSE	TRUE	FALSE
cg01397065	chr19	1908328	1908329	SCAMP4	113178	2954	CGI	FALSE	TRUE	FALSE
cg01397325	chr11	20386022	20386023	HTATIP2	10553	790	CGI-S-Shore	FALSE	TRUE	FALSE
cg01400040	chr15	61091220	61091221	NARG2	79664	-319875	Non-CGI	FALSE	TRUE	FALSE
cg01402631	chr5	136359400	136359401	SPOCK1	6695	475616	Non-CGI	FALSE	TRUE	FALSE
cg01403803	chr5	123987218	123987219	ZNF608	57507	97280	CGI-N-Shore	FALSE	TRUE	FALSE
cg01408363	chr12	125033903	125033904	NCOR2	9612	18105	CGI	FALSE	TRUE	FALSE
cg01408817	chr19	35606534	35606535	FXYD3	5349	-196	Non-CGI	TRUE	FALSE	FALSE
cg01410615	chr2	242164067	242164068	ANO7	50636	36142	Non-CGI	FALSE	TRUE	FALSE
cg01411366	chr3	112012867	112012868	SLC9C1	285335	205	Non-CGI	FALSE	TRUE	FALSE
cg01411652	chr1	14113172	14113173	PRDM2	7799	86436	Non-CGI	FALSE	TRUE	FALSE
cg01412764	chr20	61491699	61491700	TCFL5	10732	1414	CGI-N-Shore	TRUE	TRUE	FALSE
cg01414065	chr7	5911900	5911901	OCM	654231	-8527	CGI	FALSE	FALSE	TRUE
cg01414357	chr19	48282728	48282729	SEPW1	6415	885	CGI-S-Shore	FALSE	TRUE	FALSE
cg01415937	chr1	10134620	10134621	UBE4B	10277	41578	Non-CGI	FALSE	TRUE	FALSE
cg01417394	chr4	143324090	143324091	INPP4B	8821	443512	Non-CGI	FALSE	TRUE	FALSE
cg01417594	chr15	72406367	72406368	SENP8	123228	-230	CGI-N-Shelf	TRUE	TRUE	FALSE
cg01418162	chr1	204891567	204891568	NFASC	23114	93784	Non-CGI	FALSE	TRUE	FALSE
cg01422009	chr16	125896	125897	RHBDF1	64285	453	CGI-N-Shore	TRUE	TRUE	FALSE
cg01422249	chr5	132110968	132110969	2008-09-01	23176	2591	CGI-N-Shore	FALSE	TRUE	FALSE
cg01424889	chr12	58211193	58211194	AVIL	10677	-1340	Non-CGI	TRUE	FALSE	FALSE
cg01425188	chr8	28479277	28479278	EXTL3	2137	-79874	CGI-N-Shore	FALSE	FALSE	TRUE
cg01426125	chr6	17817690	17817691	NUP153	9972	-110871	Non-CGI	FALSE	TRUE	FALSE
cg01426903	chr20	3667841	3667842	ADAM33	80332	-5102	Non-CGI	FALSE	TRUE	FALSE
cg01428071	chr6	79785773	79785774	PHIP	55023	2236	CGI-N-Shore	FALSE	TRUE	FALSE
cg01428095	chr1	228134229	228134230	WNT9A	7483	1445	CGI-N-Shore	FALSE	TRUE	FALSE
cg01429256	chr17	17687834	17687835	SMCR5	140771	-4990	CGI-S-Shore	FALSE	TRUE	FALSE
cg01432329	chr10	131005737	131005738	MGMT	4255	-259715	CGI	FALSE	FALSE	TRUE
cg01433914	chr10	111792543	111792544	LOC100505933	100505933	-24403	Non-CGI	FALSE	TRUE	FALSE
cg01435643	chr13	113689776	113689777	MCF2L-AS1	100289410	-66823	CGI-S-Shore	FALSE	TRUE	FALSE
cg01437439	chr1	9383245	9383246	SPSB1	80176	30303	CGI	FALSE	TRUE	FALSE
cg01437781	chr10	118563568	118563569	ENO4	387712	-45453	CGI	FALSE	TRUE	FALSE
cg01438868	chr3	177802381	177802382	KCNMB2	10242	-451841	Non-CGI	FALSE	FALSE	TRUE
cg01439322	chr19	57873748	57873749	TRAPPC2P1	10597	-1129	CGI-N-Shore	TRUE	FALSE	FALSE
cg01439383	chr7	2728776	2728777	AMZ1	155185	9612	CGI	FALSE	TRUE	FALSE
cg01440556	chr2	242165309	242165310	ANO7	50636	37384	CGI-N-Shelf	FALSE	FALSE	TRUE
cg01444716	chr20	11898557	11898558	BTBD3	22903	27079	Non-CGI	TRUE	TRUE	FALSE
cg01445827	chr1	96952956	96952957	PTBP2	58155	-234217	Non-CGI	FALSE	FALSE	TRUE
cg01446217	chr9	5831674	5831675	ERMP1	79956	1405	CGI-N-Shore	TRUE	TRUE	FALSE
cg01446620	chr3	133461738	133461739	SRPRB	58477	-41137	CGI-N-Shelf	FALSE	TRUE	FALSE
cg01448470	chr1	18518226	18518227	IGSF21	84966	83985	Non-CGI	FALSE	TRUE	FALSE
cg01449756	chr4	128125758	128125759	INTU	27152	-428327	Non-CGI	FALSE	FALSE	TRUE
cg01450522	chr3	13465878	13465879	NUP210	23225	-4068	CGI-S-Shelf	FALSE	FALSE	TRUE
cg01450807	chr13	73715706	73715707	KLF5	688	86591	Non-CGI	FALSE	FALSE	TRUE
cg01450896	chr16	1041686	1041687	SOX8	30812	9877	CGI-S-Shore	FALSE	FALSE	TRUE
cg01454638	chr2	175661561	175661562	CHRNA1	1134	-32360	Non-CGI	FALSE	FALSE	TRUE
cg01455178	chr1	205648187	205648188	ELK4	2005	1441	CGI-N-Shore	FALSE	TRUE	FALSE
cg01462453	chr7	155970262	155970263	LOC285889	285889	268018	CGI	FALSE	FALSE	TRUE
cg01462668	chr4	96292858	96292859	UNC5C	8633	177501	Non-CGI	FALSE	TRUE	FALSE
cg01465177	chr3	182208536	182208537	FLJ46066	401103	-4385	Non-CGI	FALSE	FALSE	TRUE
cg01465596	chr1	42381916	42381917	HIVEP3	59269	119678	CGI-N-Shore	FALSE	TRUE	FALSE
cg01467532	chr10	115738883	115738884	ADRB1	153	-64921	Non-CGI	FALSE	FALSE	TRUE
cg01469847	chr11	1771930	1771931	IFITM10	402778	-105	CGI-S-Shore	TRUE	TRUE	FALSE
cg01474424	chr5	155754231	155754232	PPP1R2P3	153743	-523316	Non-CGI	TRUE	TRUE	FALSE
cg01476047	chr10	73974007	73974008	ASCC1	51008	2883	CGI-N-Shore	TRUE	TRUE	FALSE
cg01476062	chr5	65118763	65118764	NLN	57486	100739	Non-CGI	FALSE	TRUE	FALSE
cg01477933	chr12	122922107	122922108	CLIP1	6249	-14990	Non-CGI	FALSE	FALSE	TRUE
cg01482790	chr19	8513923	8513924	HNRNPM	4670	4119	CGI-S-Shelf	FALSE	TRUE	FALSE
cg01482969	chr11	44468028	44468029	CD82	3732	-119111	Non-CGI	FALSE	FALSE	TRUE
cg01484156	chr8	102802615	102802616	GRHL2	79977	297946	Non-CGI	FALSE	TRUE	FALSE
cg01484799	chr11	35637517	35637518	FJX1	24147	-2216	CGI-N-Shore	FALSE	FALSE	TRUE
cg01486183	chr14	45930824	45930825	MIS18BP1	55320	-208218	Non-CGI	FALSE	FALSE	TRUE
cg01486558	chr3	42132870	42132871	TRAK1	22906	123	Non-CGI	TRUE	FALSE	FALSE
cg01492626	chr13	50199946	50199947	ARL11	115761	-2487	Non-CGI	FALSE	FALSE	TRUE
cg01495332	chr7	50798564	50798565	GRB10	2887	62593	Non-CGI	FALSE	TRUE	FALSE
cg01500097	chr6	110011156	110011157	AKD1	221264	1257	CGI-N-Shore	TRUE	TRUE	FALSE
cg01505406	chr6	710835	710836	EXOC2	55770	-17725	CGI	TRUE	FALSE	FALSE
cg01507342	chr17	65387096	65387097	PITPNC1	26207	13171	Non-CGI	FALSE	TRUE	FALSE
cg01511234	chr12	92459079	92459080	BTG1	694	80592	Non-CGI	FALSE	TRUE	FALSE
cg01511742	chr3	71112437	71112438	MIR1284	100302112	478801	CGI-N-Shore	FALSE	TRUE	FALSE
cg01512026	chr1	27718277	27718278	GPR3	2827	-873	CGI-N-Shore	TRUE	FALSE	FALSE
cg01515741	chr17	40695686	40695687	NAGLU	4669	7734	CGI	FALSE	TRUE	FALSE
cg01515835	chr8	9412956	9412957	TNKS	8658	-487	CGI-N-Shore	TRUE	FALSE	FALSE
cg01516737	chr8	26209773	26209774	BNIP3L	665	-30748	Non-CGI	FALSE	TRUE	FALSE
cg01518723	chr17	46131583	46131584	NFE2L1	4779	5896	Non-CGI	TRUE	TRUE	FALSE
cg01521274	chr14	71822452	71822453	SNORD56B	319139	-42600	Non-CGI	FALSE	FALSE	TRUE
cg01523027	chr19	12508210	12508211	ZNF799	90576	3876	CGI-N-Shelf	FALSE	TRUE	FALSE
cg01525017	chr3	181182210	181182211	SOX2-OT	347689	-99297	Non-CGI	FALSE	FALSE	TRUE
cg01526748	chr3	191930926	191930927	FGF12	2257	514460	Non-CGI	FALSE	TRUE	FALSE
cg01528492	chr8	91659356	91659357	TMEM64	169200	144501	CGI-S-Shore	TRUE	TRUE	FALSE
cg01530605	chr3	181414848	181414849	SOX2	6657	-14862	CGI-S-Shore	FALSE	TRUE	FALSE
cg01534253	chr7	28447591	28447592	CREB5	9586	108650	CGI-N-Shore	TRUE	TRUE	FALSE
cg01536956	chr6	33165577	33165578	SLC39A7	7922	-3024	CGI-N-Shelf	TRUE	TRUE	FALSE
cg01537455	chr1	205038308	205038309	TMEM81	388730	15278	CGI-N-Shore	FALSE	TRUE	FALSE
cg01538731	chr16	87757018	87757019	KLHDC4	54758	42578	CGI-S-Shore	FALSE	TRUE	FALSE
cg01539849	chr11	47376754	47376755	SLC39A13	91252	-245	CGI	TRUE	TRUE	FALSE
cg01540911	chr7	129283500	129283501	NRF1	4899	31944	Non-CGI	FALSE	TRUE	FALSE
cg01541347	chr7	4729920	4729921	FOXK1	221937	46531	CGI	FALSE	TRUE	FALSE
cg01541443	chr7	30185315	30185316	C7orf41	222166	10762	Non-CGI	FALSE	TRUE	FALSE
cg01542019	chr19	14673053	14673054	NDUFB7	4713	9834	CGI-N-Shore	FALSE	TRUE	FALSE
cg01543995	chr2	235893326	235893327	SH3BP4	23677	32697	Non-CGI	FALSE	TRUE	FALSE
cg01546793	chr11	116913720	116913721	SIK3	23387	55271	Non-CGI	FALSE	TRUE	FALSE
cg01548463	chr7	135433715	135433716	FAM180A	389558	-120	Non-CGI	TRUE	FALSE	FALSE
cg01550810	chr1	8978577	8978578	CA6	765	-27343	Non-CGI	FALSE	FALSE	TRUE
cg01555764	chr20	62796178	62796179	MYT1	4661	13033	CGI	FALSE	TRUE	FALSE
cg01556677	chr7	80534871	80534872	SEMA3C	10512	16802	Non-CGI	FALSE	TRUE	FALSE
cg01558645	chr4	71587904	71587905	RUFY3	22902	17249	Non-CGI	TRUE	TRUE	FALSE
cg01565314	chr19	45737610	45737611	EXOC3L2	90332	-140	CGI	TRUE	FALSE	FALSE
cg01565584	chr6	11180077	11180078	ERVFRD-1	405754	-68005	Non-CGI	FALSE	FALSE	TRUE
cg01566323	chr16	31147199	31147200	PRSS8	5652	-47	Non-CGI	TRUE	FALSE	FALSE
cg01569052	chr16	2837641	2837642	PRSS33	260429	-932	CGI-S-Shore	TRUE	FALSE	FALSE
cg01569664	chr13	110434016	110434017	IRS2	8660	4896	CGI	FALSE	TRUE	FALSE
cg01570068	chr8	1937676	1937677	KBTBD11	9920	15631	CGI-N-Shore	FALSE	TRUE	FALSE
cg01570938	chr3	195431866	195431867	MIR570	693155	5593	Non-CGI	FALSE	TRUE	FALSE
cg01571842	chr3	57934672	57934673	FLNB	2317	-59453	Non-CGI	FALSE	FALSE	TRUE
cg01572144	chr2	236293517	236293518	AGAP1	116987	-109214	CGI	FALSE	FALSE	TRUE
cg01573089	chr10	696063	696064	PRR26	414235	174	CGI-S-Shore	TRUE	TRUE	FALSE
cg01577760	chr11	67776123	67776124	ALDH3B1	221	74	Non-CGI	TRUE	FALSE	FALSE
cg01578875	chr4	146804010	146804011	ZNF827	152485	55595	Non-CGI	FALSE	TRUE	FALSE
cg01579600	chr5	123589203	123589204	ZNF608	57507	495295	Non-CGI	FALSE	FALSE	TRUE
cg01581050	chr7	139256124	139256125	CLEC2L	154790	47449	CGI	FALSE	TRUE	FALSE
cg01583940	chr1	156218009	156218010	PAQR6	79957	-165	CGI-S-Shelf	TRUE	FALSE	FALSE
cg01586116	chr2	134326017	134326018	NCKAP5	344148	12	Non-CGI	TRUE	FALSE	FALSE
cg01586432	chr19	10597016	10597017	KEAP1	9817	17036	Non-CGI	FALSE	TRUE	FALSE
cg01589153	chr19	3543846	3543847	C19orf71	100128569	4690	CGI	FALSE	TRUE	FALSE
cg01589353	chr12	125500634	125500635	BRI3BP	140707	22439	CGI	FALSE	TRUE	FALSE
cg01590342	chr6	16295454	16295455	GMPR	2766	56642	Non-CGI	FALSE	TRUE	FALSE
cg01591591	chr16	3921282	3921283	CREBBP	1387	8837	Non-CGI	FALSE	TRUE	FALSE
cg01593345	chr12	12932730	12932731	MIR613	693198	15146	Non-CGI	FALSE	TRUE	FALSE
cg01595666	chr8	143052914	143052915	MIR4472-1	100616268	-204784	CGI-S-Shore	FALSE	FALSE	TRUE
cg01596289	chr6	163520766	163520767	PACRG-AS1	285796	224737	CGI-N-Shore	FALSE	TRUE	FALSE
cg01596292	chr8	101315505	101315506	RNF19A	25897	6820	Non-CGI	TRUE	TRUE	FALSE
cg01597373	chr16	760760	760761	METRN	79006	-4411	CGI-N-Shelf	FALSE	FALSE	TRUE
cg01597882	chr4	154077609	154077610	TRIM2	23321	3338	CGI-S-Shelf	FALSE	TRUE	FALSE
cg01598596	chr3	187464648	187464649	BCL6	604	-1134	CGI-S-Shore	TRUE	FALSE	FALSE
cg01599099	chr11	66649832	66649833	LRFN4	78999	24955	Non-CGI	FALSE	TRUE	FALSE
cg01601518	chr4	2404284	2404285	ZFYVE28	57732	16084	CGI-S-Shelf	FALSE	TRUE	FALSE
cg01602001	chr16	65104932	65104933	CDH11	1009	50985	CGI-N-Shore	FALSE	TRUE	FALSE
cg01602666	chr12	83176430	83176431	TMTC2	160335	95495	Non-CGI	FALSE	TRUE	FALSE
cg01604043	chr16	57130062	57130063	CPNE2	221184	3606	CGI-S-Shelf	FALSE	TRUE	FALSE
cg01604883	chr5	149674905	149674906	CAMK2A	815	-5501	CGI-N-Shelf	FALSE	FALSE	TRUE
cg01604994	chr2	236867836	236867837	GBX2	2637	208814	CGI	FALSE	TRUE	FALSE
cg01605746	chr5	669925	669926	TPPP	11076	23583	CGI	FALSE	TRUE	FALSE
cg01606875	chr9	25678753	25678754	TUSC1	286319	101	CGI-S-Shore	TRUE	FALSE	FALSE
cg01606878	chr8	119065431	119065432	EXT1	2131	58625	Non-CGI	FALSE	TRUE	FALSE
cg01607369	chr11	7598673	7598674	PPFIBP2	8495	63671	Non-CGI	TRUE	TRUE	FALSE
cg01610494	chr15	77627965	77627966	PEAK1	79834	84479	Non-CGI	FALSE	TRUE	FALSE
cg01611017	chr14	95780344	95780345	CLMN	79789	5899	Non-CGI	FALSE	TRUE	FALSE
cg01612936	chr20	34051662	34051663	CEP250	11190	8665	Non-CGI	FALSE	TRUE	FALSE
cg01614703	chr12	132278510	132278511	MMP17	4326	-34429	CGI	FALSE	TRUE	FALSE
cg01614898	chr5	3736816	3736817	IRX1	79192	140647	CGI	FALSE	FALSE	TRUE
cg01618923	chr13	49883335	49883336	CDADC1	81602	61287	Non-CGI	FALSE	TRUE	FALSE
cg01619562	chr14	93500118	93500119	ITPK1-AS1	319085	-33677	Non-CGI	FALSE	TRUE	FALSE
cg01620248	chr14	105265453	105265454	ZBTB42	100128927	-1478	CGI-N-Shore	TRUE	FALSE	FALSE
cg01624229	chr2	153252785	153252786	FMNL2	114793	61033	Non-CGI	FALSE	TRUE	FALSE
cg01630691	chr2	203359167	203359168	BMPR2	659	118116	CGI-N-Shore	FALSE	TRUE	FALSE
cg01631333	chr13	110747452	110747453	COL4A1	1282	212042	Non-CGI	FALSE	FALSE	TRUE
cg01633093	chr3	16216606	16216607	DPH3	285381	89888	Non-CGI	TRUE	TRUE	FALSE
cg01636354	chr3	134078647	134078648	AMOTL2	51421	15610	CGI-N-Shore	FALSE	TRUE	FALSE
cg01636575	chr17	13447853	13447854	HS3ST3A1	9955	57389	Non-CGI	FALSE	TRUE	FALSE
cg01637169	chr3	13459281	13459282	NUP210	23225	2526	CGI-N-Shore	FALSE	TRUE	FALSE
cg01638101	chr2	74612812	74612813	DCTN1-AS1	100189589	-31	Non-CGI	TRUE	TRUE	FALSE
cg01642461	chr14	65289728	65289729	SPTB	6710	56871	Non-CGI	TRUE	TRUE	FALSE
cg01647204	chr14	100883459	100883460	WDR25	79446	40703	Non-CGI	FALSE	TRUE	FALSE
cg01647560	chr11	83404491	83404492	CCDC90B	60492	-407076	Non-CGI	FALSE	TRUE	FALSE
cg01648659	chr2	230311091	230311092	PID1	55022	-175033	Non-CGI	FALSE	TRUE	FALSE
cg01651250	chr6	32060681	32060682	TNXB	7148	24788	CGI-N-Shelf	FALSE	TRUE	FALSE
cg01653532	chr17	57444078	57444079	MIR4729	100616204	633	Non-CGI	FALSE	TRUE	FALSE
cg01657761	chr15	95836283	95836284	LOC400456	400456	34044	Non-CGI	FALSE	TRUE	FALSE
cg01658960	chr12	132690570	132690571	NOC4L	79050	61576	CGI	TRUE	TRUE	FALSE
cg01659586	chr3	13114343	13114344	IQSEC1	9922	272	CGI-N-Shore	FALSE	TRUE	FALSE
cg01661130	chr16	51150297	51150298	SALL1	6299	34884	CGI-S-Shelf	FALSE	FALSE	TRUE
cg01663008	chr2	134357740	134357741	NCKAP5	344148	-31708	Non-CGI	FALSE	FALSE	TRUE
cg01663052	chr14	31923667	31923668	DTD2	112487	3011	CGI-N-Shelf	FALSE	TRUE	FALSE
cg01665118	chr13	77502805	77502806	BTF3P11	690	219	Non-CGI	TRUE	FALSE	FALSE
cg01668352	chr12	64482597	64482598	C12orf66	144577	133477	Non-CGI	FALSE	TRUE	FALSE
cg01670714	chr20	33111318	33111319	DYNLRB1	83658	7113	Non-CGI	FALSE	TRUE	FALSE
cg01671575	chr1	230513566	230513567	PGBD5	79605	-174	Non-CGI	TRUE	FALSE	FALSE
cg01676959	chr5	34838588	34838589	TTC23L	153657	-679	CGI-N-Shore	TRUE	FALSE	FALSE
cg01678309	chr15	68930255	68930256	CORO2B	10391	58946	Non-CGI	FALSE	TRUE	FALSE
cg01678799	chr15	43481741	43481742	CCNDBP1	23582	4274	CGI-S-Shelf	FALSE	TRUE	FALSE
cg01682917	chr13	114865944	114865945	RASA3	22821	32149	CGI	FALSE	TRUE	FALSE
cg01686177	chr7	21452797	21452798	SP4	6671	-14890	Non-CGI	FALSE	FALSE	TRUE
cg01686933	chr11	119596104	119596105	PVRL1	5818	3329	CGI-N-Shelf	FALSE	TRUE	FALSE
cg01696784	chr2	235904501	235904502	SH3BP4	23677	43872	CGI	TRUE	TRUE	FALSE
cg01696984	chr3	185080356	185080357	MAP3K13	9175	79626	Non-CGI	TRUE	TRUE	FALSE
cg01697794	chr17	7117125	7117126	ACADVL	37	-3317	CGI-S-Shore	FALSE	TRUE	FALSE
cg01698177	chr16	19870092	19870093	GPRC5B	51704	26738	CGI	FALSE	TRUE	FALSE
cg01699740	chr11	123396486	123396487	GRAMD1B	57476	-40	Non-CGI	TRUE	FALSE	FALSE
cg01701303	chr13	114060627	114060628	GRTP1	79774	-42163	CGI	FALSE	FALSE	TRUE
cg01703291	chr15	85574661	85574662	PDE8A	5151	50916	Non-CGI	FALSE	TRUE	FALSE
cg01703736	chr2	20649480	20649481	RHOB	388	2644	CGI-S-Shore	FALSE	FALSE	TRUE
cg01704198	chr3	33757893	33757894	CLASP2	23122	1810	CGI-N-Shore	FALSE	TRUE	FALSE
cg01705029	chr12	26191423	26191424	LOC100506451	100506451	-79047	Non-CGI	FALSE	TRUE	FALSE
cg01707127	chr16	947051	947052	LMF1	64788	84265	CGI-S-Shore	FALSE	TRUE	FALSE
cg01707820	chr2	23819033	23819034	KLHL29	114818	210734	Non-CGI	FALSE	TRUE	FALSE
cg01708014	chr14	51299002	51299003	NIN	51199	-1162	CGI-S-Shore	TRUE	FALSE	FALSE
cg01709518	chr3	68053484	68053485	FAM19A1	407738	12749	CGI-N-Shelf	TRUE	TRUE	FALSE
cg01713086	chr8	28268413	28268414	FBXO16	157574	79369	CGI-N-Shore	FALSE	TRUE	FALSE
cg01714087	chr1	244806334	244806335	DESI2	51029	-10016	CGI-N-Shore	FALSE	FALSE	TRUE
cg01715025	chr1	145683323	145683324	CD160	11126	32240	Non-CGI	FALSE	TRUE	FALSE
cg01718479	chr11	131240660	131240661	NTM	50863	288	CGI-N-Shore	TRUE	FALSE	FALSE
cg01719100	chr1	9255815	9255816	H6PD	9563	-39046	CGI-N-Shore	FALSE	FALSE	TRUE
cg01720337	chr3	1134711	1134712	CNTN6	27255	90	Non-CGI	TRUE	FALSE	FALSE
cg01720722	chr1	205491541	205491542	CDK18	5129	17856	Non-CGI	TRUE	TRUE	FALSE
cg01723575	chr7	16565197	16565198	LRRC72	100506049	-1306	CGI-N-Shore	TRUE	TRUE	FALSE
cg01724917	chr16	17563028	17563029	XYLT1	64131	1708	CGI-N-Shore	FALSE	TRUE	FALSE
cg01726273	chr2	70360150	70360151	LOC100133985	100133985	-7701	Non-CGI	FALSE	FALSE	TRUE
cg01727419	chr10	105616523	105616524	SH3PXD2A	9644	-1358	CGI-S-Shore	TRUE	FALSE	FALSE
cg01727686	chr11	63997306	63997307	DNAJC4	3338	-445	CGI-N-Shore	TRUE	TRUE	FALSE
cg01729066	chr9	125873915	125873916	MIR600HG	81571	3839	CGI-N-Shore	TRUE	FALSE	FALSE
cg01730148	chr2	3698421	3698422	ALLC	55821	-7363	CGI-S-Shore	FALSE	FALSE	TRUE
cg01734772	chr7	65723664	65723665	TPST1	8460	53404	Non-CGI	FALSE	TRUE	FALSE
cg01735991	chr6	70501068	70501069	LMBRD1	55788	5979	Non-CGI	TRUE	TRUE	FALSE
cg01741616	chr17	36612298	36612299	ARHGAP23	57636	27577	CGI-S-Shore	FALSE	TRUE	FALSE
cg01741999	chr2	219137824	219137825	PNKD	25953	2708	CGI-S-Shelf	FALSE	TRUE	FALSE
cg01744331	chr11	2722358	2722359	KCNQ1OT1	10984	-1129	CGI-S-Shore	TRUE	TRUE	FALSE
cg01747518	chr14	103994927	103994928	TRMT61A	115708	-580	CGI-N-Shore	TRUE	FALSE	FALSE
cg01748414	chr6	2698014	2698015	MYLK4	340156	53138	Non-CGI	FALSE	TRUE	FALSE
cg01749753	chr21	38580812	38580813	DSCR9	257203	7	Non-CGI	TRUE	FALSE	FALSE
cg01753263	chr5	171879957	171879958	SH3PXD2B	285590	1568	CGI-N-Shore	FALSE	TRUE	FALSE
cg01753966	chr4	3531945	3531946	LRPAP1	4043	2277	CGI	FALSE	TRUE	FALSE
cg01754423	chr16	51465744	51465745	SALL1	6299	-280560	Non-CGI	FALSE	FALSE	TRUE
cg01756421	chr16	67918484	67918485	NRN1L	123904	-295	Non-CGI	TRUE	FALSE	FALSE
cg01756899	chr16	1070137	1070138	SOX8	30812	38328	CGI	FALSE	FALSE	TRUE
cg01758106	chr16	12256711	12256712	SNX29	92017	186108	Non-CGI	FALSE	TRUE	FALSE
cg01759114	chr8	56494607	56494608	SBF1P1	100133234	-126725	Non-CGI	FALSE	FALSE	TRUE
cg01760189	chr17	35656896	35656897	C17orf78	284099	-76087	Non-CGI	TRUE	TRUE	FALSE
cg01766396	chr2	198436483	198436484	MOB4	25843	56187	Non-CGI	FALSE	TRUE	FALSE
cg01766743	chr12	24608519	24608520	SOX5	6660	106859	Non-CGI	FALSE	TRUE	FALSE
cg01766943	chr2	54829624	54829625	RPL23AP32	56969	73264	Non-CGI	FALSE	TRUE	FALSE
cg01768814	chr17	65437355	65437356	PITPNC1	26207	63430	Non-CGI	FALSE	TRUE	FALSE
cg01771850	chr17	80847137	80847138	ZNF750	79755	-49205	CGI-S-Shore	FALSE	TRUE	FALSE
cg01771885	chr20	60882801	60882802	ADRM1	11047	4773	CGI	FALSE	TRUE	FALSE
cg01772192	chr15	81270102	81270103	MESDC2	23184	12101	Non-CGI	FALSE	TRUE	FALSE
cg01775245	chr8	6452110	6452111	ANGPT2	285	-31325	Non-CGI	FALSE	TRUE	FALSE
cg01775265	chr20	31780882	31780883	BPIFA4P	317716	-527	Non-CGI	TRUE	FALSE	FALSE
cg01775379	chr2	159316264	159316265	PKP4	8502	2787	CGI-S-Shore	FALSE	TRUE	FALSE
cg01776199	chr7	104892331	104892332	SRPK2	6733	147465	Non-CGI	FALSE	TRUE	FALSE
cg01777433	chr5	57875838	57875839	RAB3C	115827	-3099	CGI-N-Shelf	FALSE	FALSE	TRUE
cg01778622	chr4	120419485	120419486	LOC645513	645513	43546	Non-CGI	FALSE	TRUE	FALSE
cg01779323	chr7	139164675	139164676	KLRG2	346689	3780	CGI-N-Shelf	FALSE	TRUE	FALSE
cg01779806	chr5	160279389	160279390	ATP10B	23120	-169	Non-CGI	TRUE	FALSE	FALSE
cg01781529	chr1	22444030	22444031	WNT4	54361	26353	CGI-N-Shelf	FALSE	TRUE	FALSE
cg01783730	chr7	672323	672324	HEATR2	54919	-94013	CGI	FALSE	TRUE	FALSE
cg01783816	chr13	103523190	103523191	ERCC5	2073	24998	Non-CGI	FALSE	TRUE	FALSE
cg01784507	chr1	227016024	227016025	PSEN2	5664	-42247	CGI	FALSE	FALSE	TRUE
cg01786329	chr16	89114613	89114614	ACSF3	197322	-45602	CGI	FALSE	TRUE	FALSE
cg01789576	chr1	228337311	228337312	GJC2	57165	-102	Non-CGI	TRUE	FALSE	FALSE
cg01790646	chr2	240321229	240321230	HDAC4	9759	2115	CGI-N-Shore	FALSE	TRUE	FALSE
cg01791441	chr1	32255254	32255255	BAI2	576	-25605	CGI-S-Shore	FALSE	FALSE	TRUE
cg01792117	chr17	27088227	27088228	TRAF4	9618	17203	CGI-S-Shelf	FALSE	TRUE	FALSE
cg01797450	chr6	168134760	168134761	C6orf123	26238	62777	CGI-S-Shelf	FALSE	FALSE	TRUE
cg01798385	chr20	47284667	47284668	PREX1	57580	159751	CGI-S-Shelf	FALSE	TRUE	FALSE
cg01799507	chr17	76864111	76864112	USP36	57602	-27141	CGI-N-Shelf	FALSE	TRUE	FALSE
cg01799521	chr1	39305163	39305164	MYCBP	26292	33885	Non-CGI	FALSE	TRUE	FALSE
cg01800146	chr5	176794799	176794800	RGS14	10636	9954	CGI	TRUE	TRUE	FALSE
cg01803759	chr1	27831295	27831296	WASF2	10163	-14616	Non-CGI	FALSE	FALSE	TRUE
cg01805890	chr16	75271872	75271873	CTRB1	1504	18987	CGI-S-Shore	TRUE	TRUE	FALSE
cg01806192	chr3	73010941	73010942	PPP4R2	151987	-35176	Non-CGI	FALSE	TRUE	FALSE
cg01806741	chr6	1527072	1527073	FOXC1	2296	-83607	CGI-S-Shelf	FALSE	FALSE	TRUE
cg01807026	chr9	123475367	123475368	MEGF9	1955	1396	CGI-N-Shore	FALSE	TRUE	FALSE
cg01807313	chr12	117407970	117407971	FBXW8	26259	59208	CGI	FALSE	TRUE	FALSE
cg01807748	chr1	94534645	94534646	ABCA4	24	52058	Non-CGI	FALSE	TRUE	FALSE
cg01809170	chr4	184040176	184040177	WWC2	80014	19712	Non-CGI	FALSE	TRUE	FALSE
cg01816748	chr5	149512117	149512118	CSF1R	1436	-19181	CGI-S-Shelf	FALSE	TRUE	FALSE
cg01817009	chr16	67978182	67978183	LCAT	3931	-166	CGI-N-Shore	TRUE	TRUE	FALSE
cg01817067	chr12	117627223	117627224	FBXO21	23014	1075	CGI	FALSE	TRUE	FALSE
cg01823161	chr5	64422261	64422262	ADAMTS6	11174	355441	Non-CGI	FALSE	FALSE	TRUE
cg01823541	chr19	2579285	2579286	GADD45B	4616	103161	CGI	FALSE	TRUE	FALSE
cg01824172	chr7	139475138	139475139	HIPK2	28996	2553	CGI-N-Shore	FALSE	TRUE	FALSE
cg01824603	chr8	1878323	1878324	KBTBD11	9920	-43719	CGI	FALSE	TRUE	FALSE
cg01826138	chr2	181843183	181843184	UBE2E3	10477	-1927	CGI-N-Shore	TRUE	FALSE	FALSE
cg01831657	chr5	178014589	178014590	COL23A1	91522	2965	CGI-N-Shore	FALSE	TRUE	FALSE
cg01832757	chr6	159547894	159547895	FNDC1	84624	-42533	CGI-N-Shore	FALSE	FALSE	TRUE
cg01834856	chr7	99639091	99639092	ZSCAN21	7589	-8324	Non-CGI	FALSE	FALSE	TRUE
cg01836137	chr14	105167300	105167301	INF2	64423	11356	CGI-N-Shore	FALSE	TRUE	FALSE
cg01838917	chr5	134901336	134901337	CXCL14	9547	13631	Non-CGI	FALSE	FALSE	TRUE
cg01839898	chr4	6465329	6465330	PPP2R2C	5522	99996	Non-CGI	FALSE	TRUE	FALSE
cg01839993	chr10	74034644	74034645	DDIT4	54541	966	CGI	TRUE	TRUE	FALSE
cg01843272	chr22	50911936	50911937	SBF1	6305	1526	CGI-N-Shore	FALSE	TRUE	FALSE
cg01847344	chr21	45929576	45929577	C21orf90	114043	-7520	CGI-S-Shore	FALSE	TRUE	FALSE
cg01847889	chr22	19726921	19726922	TBX1	6899	-17303	CGI-S-Shelf	FALSE	FALSE	TRUE
cg01849401	chr6	32178775	32178776	NOTCH4	4855	13067	Non-CGI	FALSE	TRUE	FALSE
cg01851573	chr8	8652454	8652455	CLDN23	137075	92787	CGI	FALSE	TRUE	FALSE
cg01851874	chr8	93074929	93074930	RUNX1T1	862	40523	Non-CGI	TRUE	TRUE	FALSE
cg01854676	chr14	105147585	105147586	MIR4710	100616300	-3498	CGI-S-Shelf	FALSE	FALSE	TRUE
cg01854776	chr2	235904366	235904367	SH3BP4	23677	43737	CGI	TRUE	TRUE	FALSE
cg01855010	chr16	87465786	87465787	MAP1LC3B	81631	39984	CGI-N-Shelf	FALSE	TRUE	FALSE
cg01856509	chr10	88025255	88025256	MIR346	442911	-709	CGI-S-Shelf	TRUE	TRUE	FALSE
cg01856529	chr12	54653091	54653092	CBX5	23468	20822	Non-CGI	TRUE	TRUE	FALSE
cg01858895	chr5	139094177	139094178	CXXC5	51523	65875	CGI-S-Shelf	FALSE	FALSE	TRUE
cg01859228	chr15	64208452	64208453	HERC1	8925	-82304	Non-CGI	FALSE	TRUE	FALSE
cg01860271	chr6	64515007	64515008	PHF3	23469	169281	Non-CGI	FALSE	TRUE	FALSE
cg01861019	chr11	127547963	127547964	KIRREL3	84623	-674607	Non-CGI	FALSE	FALSE	TRUE
cg01862311	chr8	26308815	26308816	PNMA2	10687	62666	CGI-S-Shore	FALSE	FALSE	TRUE
cg01863596	chr15	29348365	29348366	NDNL2	56160	213653	CGI-S-Shore	FALSE	TRUE	FALSE
cg01870976	chr15	101887154	101887155	LOC100507472	100507472	-37644	CGI-N-Shore	FALSE	TRUE	FALSE
cg01874730	chr16	57406425	57406426	CX3CL1	6376	10	Non-CGI	TRUE	FALSE	FALSE
cg01875596	chr18	22933696	22933697	ZNF521	25925	-1481	CGI-S-Shore	TRUE	FALSE	FALSE
cg01876176	chr11	24260751	24260752	LUZP2	338645	-257763	Non-CGI	FALSE	FALSE	TRUE
cg01876338	chr2	54087008	54087009	GPR75	10936	160	CGI	TRUE	FALSE	FALSE
cg01876531	chr1	208405868	208405869	PLXNA2	5362	11795	Non-CGI	FALSE	TRUE	FALSE
cg01879723	chr3	141119262	141119263	ZBTB38	253461	76206	CGI-N-Shore	FALSE	TRUE	FALSE
cg01879893	chr7	94928192	94928193	PON1	5444	97493	Non-CGI	FALSE	TRUE	FALSE
cg01881136	chr16	89438758	89438759	LOC100287036	100287036	51216	CGI	FALSE	TRUE	FALSE
cg01881549	chr2	235914787	235914788	SH3BP4	23677	54158	Non-CGI	FALSE	TRUE	FALSE
cg01882539	chr17	32481208	32481209	ASIC2	40	2615	CGI-N-Shelf	FALSE	TRUE	FALSE
cg01884681	chr17	70339149	70339150	SOX9	6662	221987	CGI	FALSE	FALSE	TRUE
cg01885832	chr17	47091038	47091039	IGF2BP1	10642	16263	CGI	FALSE	TRUE	FALSE
cg01894038	chr11	77741873	77741874	KCTD14	65987	-7552	Non-CGI	FALSE	TRUE	FALSE
cg01894508	chr2	70189111	70189112	ASPRV1	151516	284	Non-CGI	TRUE	FALSE	FALSE
cg01894875	chr1	2121521	2121522	C1orf86	199990	17649	CGI	TRUE	TRUE	FALSE
cg01895374	chr17	64536954	64536955	PRKCA	5578	238027	Non-CGI	FALSE	TRUE	FALSE
cg01896807	chr9	136472856	136472857	FAM163B	642968	-27487	CGI-N-Shore	FALSE	FALSE	TRUE
cg01897944	chr17	67633729	67633730	MAP2K6	5608	222890	Non-CGI	FALSE	FALSE	TRUE
cg01899620	chr13	113689422	113689423	MCF2L-AS1	100289410	-66469	CGI	FALSE	TRUE	FALSE
cg01899937	chr4	185723505	185723506	SLED1	643036	-3304	CGI-N-Shore	FALSE	TRUE	FALSE
cg01900832	chr20	50385371	50385372	ATP9A	10079	-462	CGI	TRUE	FALSE	FALSE
cg01901579	chr14	95615731	95615732	DICER1-AS1	400242	-8292	Non-CGI	FALSE	TRUE	FALSE
cg01902066	chr16	50727242	50727243	NOD2	64127	-270	CGI	TRUE	FALSE	FALSE
cg01903440	chr13	77063526	77063527	KCTD12	115207	397012	Non-CGI	FALSE	FALSE	TRUE
cg01904393	chr12	51815083	51815084	GALNT6	11226	-29681	CGI-N-Shelf	FALSE	TRUE	FALSE
cg01905172	chr6	33283898	33283899	TAPBP	6892	-1733	CGI-S-Shore	TRUE	TRUE	FALSE
cg01905478	chr1	25040257	25040258	CLIC4	25932	-31501	Non-CGI	FALSE	FALSE	TRUE
cg01906054	chr17	14683649	14683650	CDRT7	94150	-250641	Non-CGI	FALSE	FALSE	TRUE
cg01909242	chr12	130498375	130498376	LOC100190940	100190940	28510	CGI	FALSE	FALSE	TRUE
cg01909856	chr9	139438290	139438291	NOTCH1	4851	1946	CGI-N-Shore	FALSE	TRUE	FALSE
cg01910478	chr14	76373678	76373679	TGFB3	7043	74412	Non-CGI	FALSE	TRUE	FALSE
cg01913436	chr1	3340086	3340087	ARHGEF16	27237	-31059	CGI-N-Shelf	FALSE	TRUE	FALSE
cg01913577	chr1	81770649	81770650	LPHN2	23266	-1194	Non-CGI	TRUE	FALSE	FALSE
cg01918604	chr1	112107941	112107942	ADORA3	140	-1343	Non-CGI	TRUE	TRUE	FALSE
cg01923891	chr11	117603285	117603286	DSCAML1	57453	84953	Non-CGI	FALSE	TRUE	FALSE
cg01926614	chr3	117714932	117714933	IGSF11	152404	1149964	CGI-N-Shore	FALSE	FALSE	TRUE
cg01928411	chr12	50793981	50793982	LARP4	113251	-609	CGI-N-Shore	TRUE	FALSE	FALSE
cg01928553	chr7	149571982	149571983	ATP6V0E2-AS1	401431	-1030	CGI-S-Shore	TRUE	TRUE	FALSE
cg01930478	chr1	3373794	3373795	ARHGEF16	27237	2646	CGI-S-Shelf	FALSE	TRUE	FALSE
cg01933709	chr14	67916110	67916111	PLEK2	26499	-37281	Non-CGI	TRUE	FALSE	FALSE
cg01936287	chr20	42194581	42194582	IFT52	51098	-24996	Non-CGI	TRUE	TRUE	FALSE
cg01937840	chr5	11588971	11588972	CTNND2	1501	315137	Non-CGI	TRUE	TRUE	FALSE
cg01938570	chr9	129593426	129593427	ZBTB43	23099	26140	CGI-N-Shelf	TRUE	TRUE	FALSE
cg01940708	chr17	29721727	29721728	RAB11FIP4	84440	3084	CGI-S-Shelf	FALSE	TRUE	FALSE
cg01942558	chr2	152214027	152214028	TNFAIP6	7130	-77	Non-CGI	TRUE	TRUE	FALSE
cg01942816	chr7	5535463	5535464	MIR589	693174	83	CGI	TRUE	TRUE	FALSE
cg01948850	chr3	11651536	11651537	VGLL4	9686	110682	CGI	FALSE	TRUE	FALSE
cg01950074	chr3	187037719	187037720	MASP1	5648	-27908	Non-CGI	FALSE	FALSE	TRUE
cg01953156	chr3	58279498	58279499	RPP14	11102	-12472	CGI-S-Shelf	FALSE	TRUE	FALSE
cg01954585	chr15	86270435	86270436	MIR1276	100302121	43372	Non-CGI	FALSE	TRUE	FALSE
cg01955745	chr11	131240413	131240414	NTM	50863	41	CGI-N-Shore	TRUE	FALSE	FALSE
cg01957585	chr8	18541446	18541447	NAT2	10	292690	CGI	TRUE	TRUE	FALSE
cg01959435	chr22	39759957	39759958	TAB1	10454	14002	CGI-S-Shelf	TRUE	TRUE	FALSE
cg01962471	chr6	157876936	157876937	MIR3692	100500899	-73226	CGI	FALSE	TRUE	FALSE
cg01964856	chr16	1034270	1034271	SOX8	30812	2461	CGI	FALSE	TRUE	FALSE
cg01965939	chr5	148442694	148442695	SH3TC2	79628	41	Non-CGI	TRUE	FALSE	FALSE
cg01966922	chr11	84028562	84028563	CCDC90B	60492	-1031147	Non-CGI	TRUE	TRUE	FALSE
cg01972688	chr11	45928848	45928849	C11orf94	143678	-14	Non-CGI	TRUE	FALSE	FALSE
cg01975505	chr19	48497828	48497829	ELSPBP1	64100	-78	Non-CGI	TRUE	FALSE	FALSE
cg01977413	chr3	170224495	170224496	SLC7A14	57709	79366	Non-CGI	FALSE	TRUE	FALSE
cg01982170	chr3	40301346	40301347	EIF1B	10289	-49825	Non-CGI	FALSE	TRUE	FALSE
cg01983216	chr1	244217562	244217563	ZBTB18	10472	3000	CGI-N-Shore	TRUE	TRUE	FALSE
cg01983393	chr7	83081175	83081176	SEMA3E	9723	197302	Non-CGI	FALSE	TRUE	FALSE
cg01985396	chr6	39760833	39760834	DAAM2	23500	673	CGI-S-Shore	TRUE	TRUE	FALSE
cg01986648	chr6	64226341	64226342	PTP4A1	7803	-5308	Non-CGI	FALSE	FALSE	TRUE
cg01986717	chr19	35535021	35535022	HPN	3249	3610	CGI-S-Shelf	FALSE	TRUE	FALSE
cg01988285	chr3	50306107	50306108	SEMA3B	7869	1066	Non-CGI	TRUE	TRUE	FALSE
cg01989521	chr14	103522012	103522013	CDC42BPB	9578	1728	CGI-N-Shore	FALSE	TRUE	FALSE
cg01989611	chr22	31221853	31221854	MIR3200	100422912	94308	CGI-S-Shelf	FALSE	TRUE	FALSE
cg01991687	chr19	5290521	5290522	PTPRS	5802	50291	CGI-N-Shelf	FALSE	TRUE	FALSE
cg01991934	chr14	93412768	93412769	CHGA	1113	23322	CGI	FALSE	TRUE	FALSE
cg01992487	chr16	84268524	84268525	KCNG4	93107	4830	CGI-N-Shore	FALSE	TRUE	FALSE
cg02000275	chr14	34488059	34488060	EGLN3	112399	-67774	Non-CGI	FALSE	FALSE	TRUE
cg02004044	chr17	79107140	79107141	MIR1250	100302229	-31	Non-CGI	TRUE	TRUE	FALSE
cg02006142	chr8	126302396	126302397	TRIB1	10221	-140165	Non-CGI	FALSE	TRUE	FALSE
cg02008511	chr5	54737053	54737054	RNF138P1	379013	93315	Non-CGI	FALSE	TRUE	FALSE
cg02009103	chr10	102766386	102766387	LZTS2	84445	9521	CGI	FALSE	TRUE	FALSE
cg02009694	chr9	130713760	130713761	DPM2	8818	-12996	Non-CGI	TRUE	TRUE	FALSE
cg02010852	chr9	126118355	126118356	CRB2	286204	-91	Non-CGI	TRUE	FALSE	FALSE
cg02011953	chr9	103790013	103790014	LPPR1	54886	-1016	CGI-N-Shore	TRUE	FALSE	FALSE
cg02011981	chr11	70256681	70256682	CTTN	2017	12068	CGI	FALSE	TRUE	FALSE
cg02013527	chr5	88426579	88426580	MEF2C	4208	-226656	Non-CGI	FALSE	FALSE	TRUE
cg02013841	chr13	49159767	49159768	RCBTB2	1102	-49648	Non-CGI	FALSE	FALSE	TRUE
cg02015741	chr5	3394050	3394051	LOC285577	285577	142156	CGI	FALSE	FALSE	TRUE
cg02015800	chr22	20937702	20937703	MED15	51586	75815	CGI-N-Shelf	FALSE	TRUE	FALSE
cg02016985	chr16	4511773	4511774	HMOX2	3163	-12944	CGI-N-Shore	FALSE	TRUE	FALSE
cg02018076	chr16	51175381	51175382	SALL1	6299	9800	CGI-S-Shore	FALSE	TRUE	FALSE
cg02018291	chr17	65487462	65487463	PITPNC1	26207	113537	Non-CGI	FALSE	TRUE	FALSE
cg02018337	chr17	9921982	9921983	RCVRN	5957	-113297	Non-CGI	FALSE	TRUE	FALSE
cg02027561	chr6	126110790	126110791	NCOA7	135112	8482	CGI-N-Shore	TRUE	TRUE	FALSE
cg02029665	chr22	46441799	46441800	LOC100271722	100271722	-1050	CGI-S-Shore	TRUE	FALSE	FALSE
cg02030141	chr1	51124256	51124257	DMRTA2	63950	-235136	Non-CGI	FALSE	TRUE	FALSE
cg02030275	chr20	31169126	31169127	LOC149950	149950	-6153	CGI-N-Shore	FALSE	TRUE	FALSE
cg02030542	chr16	70722454	70722455	MTSS1L	92154	-2499	CGI-S-Shelf	TRUE	TRUE	FALSE
cg02035366	chr7	79085293	79085294	MAGI2	9863	-2402	CGI-S-Shore	FALSE	TRUE	FALSE
cg02041593	chr3	122741233	122741234	SEMA5B	54437	6217	CGI-N-Shelf	FALSE	TRUE	FALSE
cg02044895	chr11	58343318	58343319	LPXN	9404	2373	CGI-N-Shore	TRUE	TRUE	FALSE
cg02049955	chr11	118045910	118045911	SCN2B	6327	1425	CGI-S-Shelf	FALSE	TRUE	FALSE
cg02052531	chr5	81692895	81692896	ATP6AP1L	92270	117613	Non-CGI	FALSE	FALSE	TRUE
cg02053092	chr6	119220428	119220429	ASF1A	25842	5186	CGI-S-Shelf	FALSE	TRUE	FALSE
cg02054252	chr12	50078554	50078555	FMNL3	91010	22641	Non-CGI	FALSE	TRUE	FALSE
cg02056751	chr11	2320647	2320648	C11orf21	29125	2494	Non-CGI	FALSE	TRUE	FALSE
cg02057239	chr16	67868085	67868086	THAP11	57215	-8126	CGI-S-Shore	TRUE	TRUE	FALSE
cg02060732	chr17	77151206	77151207	ENGASE	64772	80186	CGI-S-Shelf	FALSE	TRUE	FALSE
cg02066441	chr1	17858588	17858589	ARHGEF10L	55160	-7740	Non-CGI	FALSE	FALSE	TRUE
cg02067585	chr13	113464357	113464358	ATP11A	23250	119713	CGI	FALSE	TRUE	FALSE
cg02069524	chr10	1234332	1234333	LINC00200	399706	28623	CGI-N-Shore	TRUE	TRUE	FALSE
cg02070906	chr5	158869634	158869635	LOC285627	285627	23648	Non-CGI	FALSE	FALSE	TRUE
cg02072875	chr7	2606796	2606797	IQCE	23288	8163	CGI	FALSE	TRUE	FALSE
cg02073775	chr5	71478626	71478627	MIR4803	100616377	13331	Non-CGI	FALSE	TRUE	FALSE
cg02073839	chr6	168417743	168417744	KIF25	3834	17970	CGI-S-Shore	TRUE	TRUE	FALSE
cg02076355	chr10	45474372	45474373	C10orf10	11067	-41	CGI-S-Shelf	TRUE	TRUE	FALSE
cg02077068	chr16	19872240	19872241	GPRC5B	51704	24590	CGI-S-Shelf	FALSE	TRUE	FALSE
cg02079034	chr6	150589148	150589149	IYD	389434	-100878	Non-CGI	FALSE	FALSE	TRUE
cg02083080	chr6	169104434	169104435	SMOC2	64094	262602	CGI-N-Shore	FALSE	FALSE	TRUE
cg02084118	chr7	971027	971028	ADAP1	11033	44206	CGI-S-Shelf	FALSE	TRUE	FALSE
cg02087985	chr1	151665715	151665716	RIIAD1	284485	-17192	Non-CGI	FALSE	TRUE	FALSE
cg02088347	chr1	8923969	8923970	ENO1-AS1	100505975	-14923	Non-CGI	FALSE	TRUE	FALSE
cg02089185	chr10	78646482	78646483	KCNMA1	3778	751093	Non-CGI	TRUE	TRUE	FALSE
cg02091168	chr10	133878635	133878636	JAKMIP3	282973	-39676	CGI	FALSE	FALSE	TRUE
cg02092589	chr6	160498383	160498384	LOC729603	729603	-15729	CGI-N-Shelf	FALSE	TRUE	FALSE
cg02093692	chr3	193798490	193798491	HES1	3280	-55439	Non-CGI	FALSE	FALSE	TRUE
cg02096194	chr3	51997492	51997493	PCBP4	57060	3988	CGI-N-Shelf	TRUE	TRUE	FALSE
cg02100011	chr22	38635773	38635774	TMEM184B	25829	33265	Non-CGI	FALSE	TRUE	FALSE
cg02101307	chr10	86004424	86004425	RGR	5995	-383	Non-CGI	TRUE	FALSE	FALSE
cg02101355	chr11	121970694	121970695	MIR125B1	406911	-141	CGI-N-Shore	TRUE	TRUE	FALSE
cg02102075	chr16	474430	474431	RAB11FIP3	9727	-1236	CGI	TRUE	FALSE	FALSE
cg02104162	chr6	4610716	4610717	CDYL	9425	-95675	Non-CGI	TRUE	FALSE	FALSE
cg02106683	chr2	127933644	127933645	CYP27C1	339761	44008	CGI	FALSE	FALSE	TRUE
cg02108796	chr11	1535903	1535904	DUSP8	1850	57245	CGI-N-Shore	FALSE	TRUE	FALSE
cg02115781	chr2	172175273	172175274	TLK1	9874	-87448	Non-CGI	FALSE	TRUE	FALSE
cg02117416	chr1	205897545	205897546	SLC26A9	115019	15041	Non-CGI	TRUE	TRUE	FALSE
cg02118630	chr2	25552751	25552752	MIR1301	100302246	-1160	Non-CGI	TRUE	TRUE	FALSE
cg02118886	chr6	158464852	158464853	SYNJ2	8871	61963	CGI-S-Shore	FALSE	TRUE	FALSE
cg02121547	chr11	113649020	113649021	CLDN25	644672	-1496	Non-CGI	TRUE	FALSE	FALSE
cg02123534	chr7	965485	965486	ADAP1	11033	49748	CGI	FALSE	TRUE	FALSE
cg02124184	chr5	72950691	72950692	ARHGEF28	64283	28707	Non-CGI	FALSE	TRUE	FALSE
cg02124565	chr7	28469901	28469902	CREB5	9586	130960	Non-CGI	FALSE	TRUE	FALSE
cg02124724	chr21	46875142	46875143	COL18A1-AS1	378832	-30156	CGI-N-Shore	TRUE	TRUE	FALSE
cg02126477	chr8	12973902	12973903	KIAA1456	57604	170750	Non-CGI	TRUE	TRUE	FALSE
cg02127375	chr13	35589003	35589004	NBEA	26960	72578	Non-CGI	FALSE	TRUE	FALSE
cg02128191	chr10	669285	669286	PRR26	414235	-26601	CGI-N-Shore	FALSE	TRUE	FALSE
cg02130329	chr8	108370910	108370911	ANGPT1	284	139342	Non-CGI	FALSE	TRUE	FALSE
cg02134022	chr5	79040203	79040204	CMYA5	202333	54543	Non-CGI	FALSE	TRUE	FALSE
cg02134720	chr8	119948501	119948502	TNFRSF11B	4982	15880	Non-CGI	FALSE	TRUE	FALSE
cg02135077	chr8	103820770	103820771	AZIN1	51582	55625	CGI-S-Shore	TRUE	FALSE	FALSE
cg02135821	chr14	94545678	94545679	DDX24	57062	1878	CGI-N-Shore	TRUE	TRUE	FALSE
cg02143404	chr16	85607651	85607652	GSE1	23199	-37376	CGI-N-Shore	FALSE	FALSE	TRUE
cg02144030	chr14	102621015	102621016	WDR20	91833	14825	Non-CGI	FALSE	TRUE	FALSE
cg02149537	chr5	164259834	164259835	MAT2B	27430	1329602	Non-CGI	FALSE	FALSE	TRUE
cg02157052	chr13	101326091	101326092	TMTC4	84899	1010	CGI	FALSE	TRUE	FALSE
cg02164088	chr11	45928937	45928938	C11orf94	143678	-103	Non-CGI	TRUE	FALSE	FALSE
cg02167986	chr14	68201122	68201123	RDH12	145226	32518	Non-CGI	FALSE	TRUE	FALSE
cg02169857	chr2	110969641	110969642	NPHP1	4867	-7001	CGI-N-Shore	FALSE	TRUE	FALSE
cg02170103	chr16	4001959	4001960	CREBBP	1387	-71837	CGI-S-Shore	FALSE	FALSE	TRUE
cg02170784	chr16	1034527	1034528	SOX8	30812	2718	CGI	FALSE	TRUE	FALSE
cg02171771	chr7	98424445	98424446	TMEM130	222865	43226	CGI-S-Shore	FALSE	FALSE	TRUE
cg02172819	chr10	79261503	79261504	KCNMA1	3778	136072	Non-CGI	FALSE	TRUE	FALSE
cg02177950	chr16	3554755	3554756	CLUAP1	23059	3791	CGI-S-Shelf	FALSE	TRUE	FALSE
cg02181287	chr14	77785784	77785785	POMT2	29954	1439	CGI-N-Shore	TRUE	TRUE	FALSE
cg02182592	chr17	79102969	79102970	MIR338	442906	-3219	CGI-S-Shelf	FALSE	TRUE	FALSE
cg02184281	chr18	46447797	46447798	SMAD7	4092	29282	CGI	FALSE	TRUE	FALSE
cg02185160	chr8	61833707	61833708	LOC100130298	100130298	46598	CGI-N-Shore	FALSE	FALSE	TRUE
cg02189760	chr19	49842655	49842656	CD37	951	4226	CGI	FALSE	TRUE	FALSE
cg02193425	chr6	3848280	3848281	FAM50B	26240	-1350	CGI-N-Shore	TRUE	FALSE	FALSE
cg02195151	chr16	1069622	1069623	SOX8	30812	37813	CGI	FALSE	FALSE	TRUE
cg02198513	chr4	38987121	38987122	TMEM156	80008	46918	Non-CGI	FALSE	TRUE	FALSE
cg02200717	chr14	21511676	21511677	RNASE7	84659	1290	Non-CGI	FALSE	TRUE	FALSE
cg02201066	chr6	114376759	114376760	HDAC2	3066	-84399	Non-CGI	FALSE	TRUE	FALSE
cg02203420	chr9	19786951	19786952	SLC24A2	25769	64	CGI-N-Shore	TRUE	TRUE	FALSE
cg02203711	chr22	39855863	39855864	MGAT3	4248	2537	CGI-S-Shore	FALSE	TRUE	FALSE
cg02206259	chr1	231003485	231003486	C1orf198	84886	1848	CGI-N-Shore	FALSE	TRUE	FALSE
cg02210151	chr10	123356041	123356042	FGFR2	2263	1929	CGI-S-Shore	TRUE	TRUE	FALSE
cg02210887	chr4	156586680	156586681	GUCY1A3	2982	-1180	CGI-N-Shore	TRUE	FALSE	FALSE
cg02213663	chr10	79632098	79632099	DLG5	9231	54248	Non-CGI	FALSE	TRUE	FALSE
cg02215611	chr16	67918965	67918966	NRN1L	123904	183	Non-CGI	TRUE	TRUE	FALSE
cg02216667	chr1	162346613	162346614	C1orf111	284680	29	Non-CGI	TRUE	FALSE	FALSE
cg02218200	chr22	51135138	51135139	SHANK3	85358	22067	CGI-S-Shore	TRUE	TRUE	FALSE
cg02219601	chr14	35835511	35835512	NFKBIA	4792	38447	CGI-S-Shelf	FALSE	FALSE	TRUE
cg02220233	chr4	72669773	72669774	GC	2638	1462	Non-CGI	TRUE	TRUE	FALSE
cg02220284	chr3	71013485	71013486	MIR1284	100302112	577753	Non-CGI	FALSE	TRUE	FALSE
cg02222066	chr17	76672617	76672618	DNAH17	8632	-99140	CGI-S-Shore	FALSE	TRUE	FALSE
cg02225004	chr8	140970377	140970378	KCNK9	51305	-255077	CGI-N-Shore	FALSE	TRUE	FALSE
cg02228185	chr17	3379567	3379568	ASPA	443	2162	CGI-S-Shelf	TRUE	TRUE	FALSE
cg02234734	chr1	44882329	44882330	RNF220	55182	11368	CGI-N-Shore	FALSE	TRUE	FALSE
cg02243207	chr11	120938859	120938860	TECTA	7007	-34514	Non-CGI	FALSE	TRUE	FALSE
cg02243630	chr4	154386540	154386541	KIAA0922	23240	-956	CGI-N-Shore	TRUE	FALSE	FALSE
cg02245119	chr4	113269890	113269891	ALPK1	80216	51390	Non-CGI	FALSE	TRUE	FALSE
cg02245810	chr22	51017432	51017433	CPT1B	1375	-335	CGI-S-Shore	TRUE	TRUE	FALSE
cg02245998	chr2	100210626	100210627	REV1	51455	-104145	CGI-S-Shore	FALSE	TRUE	FALSE
cg02248514	chr14	32842070	32842071	AKAP6	9472	43590	Non-CGI	FALSE	TRUE	FALSE
cg02249657	chr5	140873765	140873766	PCDHGC5	56097	4956	CGI-S-Shore	FALSE	TRUE	FALSE
cg02252907	chr19	2151887	2151888	AP3D1	8943	-330	CGI	TRUE	FALSE	FALSE
cg02255844	chr6	114662458	114662459	HS3ST5	222537	1080	CGI-N-Shore	FALSE	TRUE	FALSE
cg02255983	chr19	2798801	2798802	THOP1	7064	13294	CGI-S-Shore	FALSE	TRUE	FALSE
cg02256631	chr16	31342952	31342953	ITGAX	3687	-23555	CGI	FALSE	TRUE	FALSE
cg02258201	chr9	35906148	35906149	HRCT1	646962	-39	Non-CGI	TRUE	FALSE	FALSE
cg02258482	chr16	23434958	23434959	COG7	91949	29552	Non-CGI	FALSE	TRUE	FALSE
cg02259760	chr15	92105283	92105284	SLCO3A1	28232	-291653	Non-CGI	FALSE	FALSE	TRUE
cg02260430	chr5	149673232	149673233	CAMK2A	815	-3828	CGI-N-Shelf	FALSE	FALSE	TRUE
cg02261543	chr11	10800368	10800369	SNORD97	692223	22785	Non-CGI	FALSE	TRUE	FALSE
cg02265721	chr12	64916007	64916008	TBK1	29110	70166	Non-CGI	FALSE	FALSE	TRUE
cg02267756	chr20	42194649	42194650	IFT52	51098	-24928	Non-CGI	TRUE	TRUE	FALSE
cg02268620	chr9	97847913	97847914	MIR23B	407011	422	CGI	TRUE	TRUE	FALSE
cg02269797	chr11	11959303	11959304	DKK3	27122	72011	Non-CGI	TRUE	TRUE	FALSE
cg02270952	chr7	97952898	97952899	BRI3	25798	41918	CGI-N-Shore	FALSE	TRUE	FALSE
cg02272278	chr6	158448578	158448579	SYNJ2	8871	45689	CGI	TRUE	TRUE	FALSE
cg02273724	chr5	11906843	11906844	CTNND2	1501	-2732	CGI-S-Shelf	FALSE	FALSE	TRUE
cg02273889	chr5	123941379	123941380	ZNF608	57507	143119	Non-CGI	FALSE	FALSE	TRUE
cg02274366	chr6	123154275	123154276	SMPDL3A	10924	44303	Non-CGI	FALSE	FALSE	TRUE
cg02275294	chr1	179262462	179262463	SOAT1	6646	-385	CGI-N-Shore	TRUE	FALSE	FALSE
cg02277868	chr5	137222136	137222137	PKD2L2	27039	-2987	CGI-N-Shelf	FALSE	TRUE	FALSE
cg02284297	chr5	65114084	65114085	NLN	57486	96060	Non-CGI	FALSE	TRUE	FALSE
cg02284625	chr2	177418905	177418906	MIR1246	100302142	46873	CGI	FALSE	FALSE	TRUE
cg02284939	chr2	32238316	32238317	MEMO1	51072	26544	CGI-S-Shelf	FALSE	TRUE	FALSE
cg02286270	chr13	26584279	26584280	SHISA2	387914	40917	CGI-N-Shelf	FALSE	TRUE	FALSE
cg02286549	chr6	41700710	41700711	TFEB	7942	3285	CGI-N-Shore	TRUE	TRUE	FALSE
cg02286761	chr19	14315694	14315695	LPHN1	22859	1301	CGI-N-Shore	FALSE	TRUE	FALSE
cg02288964	chr1	967561	967562	AGRN	375790	12057	CGI-N-Shore	FALSE	TRUE	FALSE
cg02293775	chr10	126425471	126425472	FAM53B	9679	53434	Non-CGI	FALSE	TRUE	FALSE
cg02293817	chr7	35808294	35808295	2007-09-01	989	-32300	Non-CGI	FALSE	FALSE	TRUE
cg02298612	chr16	75528459	75528460	CHST6	4166	465	CGI-N-Shore	FALSE	TRUE	FALSE
cg02302348	chr10	3542628	3542629	KLF6	1316	284843	Non-CGI	FALSE	TRUE	FALSE
cg02304580	chr5	139124312	139124313	PSD2	84249	-51092	CGI-N-Shore	FALSE	FALSE	TRUE
cg02308079	chr16	67918686	67918687	NRN1L	123904	-93	Non-CGI	TRUE	FALSE	FALSE
cg02309868	chr19	35741001	35741002	LSR	51599	1441	CGI-S-Shore	FALSE	TRUE	FALSE
cg02310454	chr6	39683778	39683779	KIF6	221458	9401	Non-CGI	TRUE	TRUE	FALSE
cg02312706	chr16	87384599	87384600	C16orf95	100506581	-33572	CGI-N-Shore	FALSE	TRUE	FALSE
cg02312904	chr17	59234870	59234871	TBX2	6909	-242385	Non-CGI	FALSE	TRUE	FALSE
cg02313013	chr12	95010113	95010114	TMCC3	57458	34209	Non-CGI	TRUE	TRUE	FALSE
cg02313118	chr14	104852104	104852105	C14orf180	400258	-193950	CGI-S-Shore	FALSE	FALSE	TRUE
cg02314782	chr17	40163229	40163230	NKIRAS2	28511	-6363	Non-CGI	FALSE	TRUE	FALSE
cg02315732	chr11	61732658	61732659	FTH1	2495	2472	CGI-N-Shore	FALSE	TRUE	FALSE
cg02317955	chr17	79099481	79099482	MIR3065	100422915	-194	CGI-S-Shore	TRUE	TRUE	FALSE
cg02319318	chr8	81639711	81639712	ZNF704	619279	147303	Non-CGI	FALSE	TRUE	FALSE
cg02319868	chr13	94885861	94885862	DCT	1638	246073	Non-CGI	FALSE	TRUE	FALSE
cg02320784	chr12	26195988	26195989	BHLHE41	79365	82013	Non-CGI	FALSE	TRUE	FALSE
cg02322889	chr4	25101274	25101275	SEPSECS	51091	60928	CGI-S-Shelf	FALSE	FALSE	TRUE
cg02323958	chr8	130930889	130930890	FAM49B	51571	98006	Non-CGI	FALSE	TRUE	FALSE
cg02324432	chr4	166130172	166130173	KLHL2	11275	1401	CGI-S-Shore	TRUE	TRUE	FALSE
cg02324789	chr14	51263199	51263200	NIN	51199	34638	Non-CGI	FALSE	TRUE	FALSE
cg02326224	chr15	81474451	81474452	IL16	3603	-640	Non-CGI	TRUE	FALSE	FALSE
cg02327001	chr4	101972762	101972763	PPP3CA	5530	295864	Non-CGI	FALSE	TRUE	FALSE
cg02329886	chr15	50557917	50557918	HDC	3067	243	Non-CGI	TRUE	FALSE	FALSE
cg02330434	chr8	111847388	111847389	KCNV1	27012	-859311	Non-CGI	FALSE	FALSE	TRUE
cg02330706	chr17	73629402	73629403	SMIM5	643008	-110	CGI-S-Shore	TRUE	TRUE	FALSE
cg02331198	chr6	106988121	106988122	AIM1	202	28815	Non-CGI	TRUE	TRUE	FALSE
cg02331830	chr8	145008288	145008289	MIR661	724031	11157	CGI-S-Shore	FALSE	TRUE	FALSE
cg02331902	chr5	90610303	90610304	ARRDC3-AS1	100129716	-65859	Non-CGI	TRUE	FALSE	FALSE
cg02333730	chr17	12199913	12199914	MIR744	100126313	214696	Non-CGI	FALSE	FALSE	TRUE
cg02335656	chr16	49845969	49845970	ZNF423	23090	14947	Non-CGI	FALSE	TRUE	FALSE
cg02336364	chr1	24764700	24764701	NIPAL3	57185	22454	Non-CGI	FALSE	TRUE	FALSE
cg02338162	chr10	43844651	43844652	FXYD4	53828	-22439	CGI-N-Shore	FALSE	FALSE	TRUE
cg02340223	chr19	30938840	30938841	ZNF536	9745	75511	CGI-S-Shelf	FALSE	TRUE	FALSE
cg02341645	chr17	71756141	71756142	LOC400620	400620	-26818	Non-CGI	FALSE	TRUE	FALSE
cg02344735	chr6	71664559	71664560	B3GAT2	135152	2227	CGI-N-Shore	FALSE	TRUE	FALSE
cg02345247	chr15	100804162	100804163	ADAMTS17	170691	78019	Non-CGI	FALSE	TRUE	FALSE
cg02345417	chr11	111631732	111631733	PPP2R1B	5519	5435	Non-CGI	FALSE	TRUE	FALSE
cg02346282	chr5	72793476	72793477	BTF3	689	-772	CGI-N-Shore	TRUE	FALSE	FALSE
cg02346442	chr3	186194046	186194047	LOC253573	253573	17402	Non-CGI	FALSE	TRUE	FALSE
cg02347212	chr17	6141790	6141791	WSCD1	23302	169352	CGI	FALSE	FALSE	TRUE
cg02347652	chr12	122332665	122332666	PSMD9	5715	6018	Non-CGI	FALSE	TRUE	FALSE
cg02347984	chr6	26170601	26170602	HIST1H2BD	3017	12251	CGI-N-Shore	FALSE	TRUE	FALSE
cg02350226	chr3	40334504	40334505	EIF1B	10289	-16667	Non-CGI	FALSE	TRUE	FALSE
cg02357541	chr3	127769619	127769620	SEC61A1	29927	-1591	CGI-N-Shore	TRUE	FALSE	FALSE
cg02357631	chr17	40120470	40120471	CNP	1267	1710	CGI	TRUE	TRUE	FALSE
cg02359506	chr4	41270335	41270336	UCHL1	7345	11436	Non-CGI	FALSE	TRUE	FALSE
cg02361027	chr2	170217401	170217402	LRP2	4036	1719	CGI-N-Shore	FALSE	TRUE	FALSE
cg02361903	chr1	110452616	110452617	CSF1	1435	-615	CGI-N-Shore	TRUE	FALSE	FALSE
cg02362848	chr1	33848786	33848787	PHC2	1912	47827	Non-CGI	FALSE	TRUE	FALSE
cg02364826	chr5	114878738	114878739	FEM1C	56929	1851	CGI-N-Shore	FALSE	TRUE	FALSE
cg02367723	chr1	46378857	46378858	MAST2	23139	109571	Non-CGI	TRUE	TRUE	FALSE
cg02370232	chr10	97175365	97175366	PDLIM1	9124	-124583	CGI	FALSE	TRUE	FALSE
cg02372037	chr12	42865986	42865987	PRICKLE1	144165	117584	Non-CGI	FALSE	TRUE	FALSE
cg02372856	chr8	49340974	49340975	EFCAB1	79645	306894	Non-CGI	FALSE	FALSE	TRUE
cg02377021	chr5	71537334	71537335	MIR4803	100616377	72039	Non-CGI	FALSE	TRUE	FALSE
cg02378006	chr10	73026288	73026289	UNC5B-AS1	728978	-48302	Non-CGI	FALSE	TRUE	FALSE
cg02378269	chr15	40697591	40697592	IVD	3712	-93	CGI-N-Shore	TRUE	FALSE	FALSE
cg02380840	chr12	69464200	69464201	CPM	1368	-107179	Non-CGI	FALSE	FALSE	TRUE
cg02381790	chr2	240313668	240313669	HDAC4	9759	9676	CGI	FALSE	TRUE	FALSE
cg02384338	chr16	19883969	19883970	GPRC5B	51704	12861	CGI-S-Shore	TRUE	TRUE	FALSE
cg02384859	chr15	74862662	74862663	ARID3B	10620	29113	Non-CGI	FALSE	TRUE	FALSE
cg02386420	chr17	78806870	78806871	CHMP6	79643	-158769	CGI-N-Shore	FALSE	TRUE	FALSE
cg02386599	chr6	39769542	39769543	DAAM2	23500	9382	Non-CGI	FALSE	TRUE	FALSE
cg02389180	chr7	46851524	46851525	TNS3	64759	770216	Non-CGI	FALSE	FALSE	TRUE
cg02390515	chr1	10239190	10239191	KIF1B	23095	-31572	Non-CGI	FALSE	TRUE	FALSE
cg02394249	chr12	93140078	93140079	PLEKHG7	440107	9812	Non-CGI	FALSE	TRUE	FALSE
cg02395590	chr5	141201505	141201506	PCDH1	5097	56437	Non-CGI	FALSE	FALSE	TRUE
cg02396676	chr3	45067564	45067565	CLEC3B	7123	-193	Non-CGI	TRUE	FALSE	FALSE
cg02396982	chr16	15796044	15796045	MIR484	619553	58892	Non-CGI	FALSE	TRUE	FALSE
cg02397061	chr6	42528725	42528726	UBR2	23304	-3033	CGI-N-Shelf	FALSE	FALSE	TRUE
cg02402843	chr12	24168193	24168194	MIR920	100126320	-197160	Non-CGI	FALSE	TRUE	FALSE
cg02404489	chr16	4684596	4684597	MGRN1	23295	9770	CGI	FALSE	TRUE	FALSE
cg02410241	chr15	68914532	68914533	CORO2B	10391	43223	Non-CGI	FALSE	TRUE	FALSE
cg02410304	chr10	685448	685449	PRR26	414235	-10438	CGI	FALSE	TRUE	FALSE
cg02411088	chr17	48258561	48258562	HILS1	373861	-8723	Non-CGI	TRUE	FALSE	FALSE
cg02412505	chr2	232467940	232467941	C2orf57	165100	10364	CGI-N-Shore	FALSE	FALSE	TRUE
cg02412803	chr16	1099138	1099139	SSTR5	6755	-23616	CGI	FALSE	FALSE	TRUE
cg02415779	chr22	18527778	18527779	FLJ41941	100192420	15626	CGI-S-Shelf	FALSE	FALSE	TRUE
cg02416781	chr5	82331856	82331857	SCARNA18	677765	28298	Non-CGI	FALSE	FALSE	TRUE
cg02417033	chr21	37851847	37851848	CHAF1B	8208	94157	Non-CGI	TRUE	TRUE	FALSE
cg02417360	chr13	113398673	113398674	ATP11A	23250	54029	CGI-S-Shore	FALSE	TRUE	FALSE
cg02417427	chr5	79479211	79479212	SERINC5	256987	72685	Non-CGI	FALSE	TRUE	FALSE
cg02420395	chr16	66731465	66731466	CMTM4	146223	-854	CGI-S-Shore	TRUE	FALSE	FALSE
cg02423014	chr15	64404647	64404648	SNX1	6642	16563	Non-CGI	FALSE	TRUE	FALSE
cg02426178	chr19	10747142	10747143	ILF3-AS1	147727	17404	CGI-N-Shore	TRUE	TRUE	FALSE
cg02430558	chr16	3539065	3539066	C16orf90	646174	6354	Non-CGI	FALSE	FALSE	TRUE
cg02432295	chr10	105412689	105412690	LOC100505839	100505839	-93846	Non-CGI	FALSE	TRUE	FALSE
cg02438545	chr9	99380444	99380445	CDC14B	8555	1666	CGI-S-Shore	FALSE	TRUE	FALSE
cg02441149	chr13	107159723	107159724	EFNB2	1948	27663	Non-CGI	FALSE	TRUE	FALSE
cg02441556	chr2	225907875	225907876	DOCK10	55619	-544	CGI-S-Shore	TRUE	FALSE	FALSE
cg02442900	chr2	234296642	234296643	DGKD	8527	33488	CGI-S-Shore	TRUE	TRUE	FALSE
cg02447227	chr1	61687239	61687240	NFIA	4774	144292	Non-CGI	FALSE	TRUE	FALSE
cg02447620	chr6	43604584	43604585	MAD2L1BP	9587	7304	CGI-S-Shore	FALSE	TRUE	FALSE
cg02447879	chr17	79393682	79393683	MIR4740	100616294	-19103	CGI-S-Shore	FALSE	TRUE	FALSE
cg02455706	chr16	84918851	84918852	CRISPLD2	83716	65263	Non-CGI	FALSE	TRUE	FALSE
cg02457085	chr1	110457683	110457684	CSF1	1435	4449	CGI-S-Shelf	FALSE	TRUE	FALSE
cg02458062	chr17	46629678	46629679	HOXB2	3212	-7284	CGI	TRUE	TRUE	FALSE
cg02459866	chr16	31203793	31203794	PYCARD	29108	10302	Non-CGI	FALSE	TRUE	FALSE
cg02461342	chr7	985614	985615	ADAP1	11033	29619	CGI-N-Shore	FALSE	TRUE	FALSE
cg02466798	chr19	941571	941572	ARID3A	1820	15533	CGI-S-Shore	FALSE	TRUE	FALSE
cg02468728	chr19	611107	611108	HCN2	610	21213	CGI	FALSE	TRUE	FALSE
cg02471028	chr4	1203653	1203654	LOC100130872	100130872	-902	CGI-S-Shore	TRUE	FALSE	FALSE
cg02473439	chr10	70515244	70515245	SNORD98	692211	314	Non-CGI	FALSE	TRUE	FALSE
cg02474563	chr10	134442032	134442033	INPP5A	3632	90678	CGI-S-Shore	FALSE	TRUE	FALSE
cg02475695	chr16	616220	616221	NHLRC4	283948	-810	CGI-S-Shore	TRUE	FALSE	FALSE
cg02477838	chr6	1136654	1136655	LOC285768	285768	-35086	Non-CGI	FALSE	FALSE	TRUE
cg02477931	chr11	131532721	131532722	NTM	50863	292349	Non-CGI	FALSE	TRUE	FALSE
cg02479022	chr8	22250005	22250006	SLC39A14	23516	25242	Non-CGI	FALSE	TRUE	FALSE
cg02480675	chr20	6514844	6514845	BMP2	650	-233899	Non-CGI	FALSE	FALSE	TRUE
cg02481498	chr2	101956421	101956422	RNF149	284996	-31242	CGI-N-Shelf	FALSE	FALSE	TRUE
cg02481642	chr20	43343760	43343761	WISP2	8839	-123	Non-CGI	TRUE	TRUE	FALSE
cg02482497	chr1	153610672	153610673	S100A13	6284	-4103	CGI-S-Shelf	TRUE	TRUE	FALSE
cg02483101	chr8	130365373	130365374	LOC728724	728724	-111886	Non-CGI	TRUE	FALSE	FALSE
cg02483204	chr12	116893985	116893986	MIR4472-2	100616309	-27861	Non-CGI	FALSE	FALSE	TRUE
cg02485922	chr16	30379391	30379392	TBC1D10B	26000	2129	CGI-N-Shore	FALSE	TRUE	FALSE
cg02486268	chr11	69682825	69682826	FGF3	2248	-48632	CGI-N-Shore	FALSE	FALSE	TRUE
cg02486332	chr12	3446251	3446252	PRMT8	56341	-44262	Non-CGI	TRUE	FALSE	FALSE
cg02488702	chr2	142889392	142889393	LRP1B	53353	-121	CGI-S-Shore	TRUE	FALSE	FALSE
cg02490102	chr2	170252185	170252186	LRP2	4036	-33062	Non-CGI	FALSE	FALSE	TRUE
cg02490847	chr16	75282051	75282052	BCAR1	9564	19898	CGI-N-Shelf	TRUE	TRUE	FALSE
cg02490920	chr3	50304406	50304407	SEMA3B	7869	-632	Non-CGI	TRUE	FALSE	FALSE
cg02491234	chr1	204226741	204226742	GOLT1A	127845	-43520	CGI	TRUE	TRUE	FALSE
cg02494582	chr10	128061835	128061836	ADAM12	8038	15290	Non-CGI	FALSE	TRUE	FALSE
cg02494930	chr16	77887307	77887308	VAT1L	57687	64823	Non-CGI	FALSE	TRUE	FALSE
cg02498174	chr5	39518835	39518836	DAB2	1601	-93499	Non-CGI	FALSE	FALSE	TRUE
cg02501166	chr12	128866698	128866699	MIR3612	100500817	88060	CGI-S-Shore	FALSE	TRUE	FALSE
cg02501746	chr7	30209513	30209514	C7orf41	222166	34960	Non-CGI	FALSE	FALSE	TRUE
cg02502358	chr17	26221089	26221090	LYRM9	201229	-679	CGI-S-Shore	TRUE	FALSE	FALSE
cg02502704	chr10	35413605	35413606	CREM	1390	-2162	CGI-N-Shore	FALSE	FALSE	TRUE
cg02506248	chr12	130502267	130502268	LOC100190940	100190940	24618	CGI	FALSE	FALSE	TRUE
cg02506717	chr7	28338790	28338791	CREB5	9586	-148	Non-CGI	TRUE	FALSE	FALSE
cg02508204	chr11	39367436	39367437	LRRC4C	57689	2113885	Non-CGI	FALSE	FALSE	TRUE
cg02511723	chr5	71402031	71402032	MAP1B	4131	-1085	CGI-N-Shore	TRUE	FALSE	FALSE
cg02512108	chr7	1315671	1315672	UNCX	340260	43016	CGI-S-Shore	FALSE	FALSE	TRUE
cg02512860	chr7	100880751	100880752	CLDN15	24146	1348	CGI-N-Shelf	TRUE	TRUE	FALSE
cg02516134	chr7	134575187	134575188	AGBL3	340351	-96070	CGI-N-Shore	TRUE	TRUE	FALSE
cg02517711	chr2	26700914	26700915	CCDC164	92749	76129	Non-CGI	TRUE	TRUE	FALSE
cg02518546	chr2	100252968	100252969	REV1	51455	-146487	Non-CGI	FALSE	TRUE	FALSE
cg02518824	chr21	43442057	43442058	ZBTB21	49854	-11560	Non-CGI	TRUE	FALSE	FALSE
cg02520399	chr8	8168661	8168662	SGK223	157285	70594	Non-CGI	FALSE	FALSE	TRUE
cg02524035	chr17	77411007	77411008	RBFOX3	146713	67671	Non-CGI	FALSE	TRUE	FALSE
cg02524112	chr16	73206624	73206625	HTA	283902	80375	CGI	FALSE	FALSE	TRUE
cg02525435	chr16	88977768	88977769	PABPN1L	390748	-44699	CGI	FALSE	TRUE	FALSE
cg02527751	chr16	2743684	2743685	KCTD5	54442	11188	CGI-N-Shore	FALSE	TRUE	FALSE
cg02530222	chr9	133794590	133794591	FIBCD1	84929	19863	CGI	FALSE	TRUE	FALSE
cg02533173	chr19	15391124	15391125	EPHX3	79852	-47265	Non-CGI	TRUE	TRUE	FALSE
cg02534659	chr5	2112561	2112562	IRX4	50805	-229680	CGI-S-Shore	FALSE	FALSE	TRUE
cg02536263	chr10	20295880	20295881	PLXDC2	84898	190507	Non-CGI	FALSE	TRUE	FALSE
cg02537342	chr11	2322729	2322730	C11orf21	29125	412	Non-CGI	TRUE	TRUE	FALSE
cg02539882	chr5	132110376	132110377	2008-09-01	23176	3183	CGI-N-Shore	FALSE	TRUE	FALSE
cg02540537	chr7	112121259	112121260	C7orf53	286006	350	Non-CGI	TRUE	TRUE	FALSE
cg02541592	chr22	45608686	45608687	MIR1249	100302149	-11785	Non-CGI	TRUE	TRUE	FALSE
cg02542817	chr2	229291442	229291443	SPHKAP	80309	-245080	CGI-S-Shore	FALSE	FALSE	TRUE
cg02544383	chr7	108899319	108899320	C7orf66	154907	-374681	Non-CGI	FALSE	FALSE	TRUE
cg02546833	chr15	53372675	53372676	ONECUT1	3175	-290465	Non-CGI	FALSE	FALSE	TRUE
cg02548132	chr8	6420242	6420243	ANGPT2	285	540	CGI-S-Shore	TRUE	TRUE	FALSE
cg02549628	chr4	88896208	88896209	SPP1	6696	-592	Non-CGI	TRUE	FALSE	FALSE
cg02550308	chr16	69310261	69310262	VPS4A	27183	-35024	Non-CGI	FALSE	TRUE	FALSE
cg02551980	chr5	112628419	112628420	TSSK1B	83942	142307	CGI-N-Shore	FALSE	TRUE	FALSE
cg02554771	chr3	66982915	66982916	KBTBD8	84541	-65810	Non-CGI	FALSE	FALSE	TRUE
cg02555579	chr22	18043043	18043044	SLC25A18	83733	-138	CGI-S-Shore	TRUE	FALSE	FALSE
cg02556430	chr21	35444440	35444441	MRPS6	64968	-1381	CGI-N-Shore	TRUE	FALSE	FALSE
cg02557652	chr15	89741016	89741017	RLBP1	6017	23904	Non-CGI	FALSE	TRUE	FALSE
cg02562579	chr15	68889832	68889833	CORO2B	10391	18523	Non-CGI	FALSE	TRUE	FALSE
cg02563349	chr12	130502049	130502050	LOC100190940	100190940	24836	CGI	FALSE	FALSE	TRUE
cg02564259	chr16	67978429	67978430	LCAT	3931	-413	CGI-N-Shore	TRUE	TRUE	FALSE
cg02564299	chr3	114130829	114130830	ZBTB20-AS1	100131117	60170	Non-CGI	FALSE	TRUE	FALSE
cg02567323	chr2	48671699	48671700	PPP1R21	129285	3790	CGI-S-Shelf	FALSE	TRUE	FALSE
cg02567839	chr1	242612787	242612788	PLD5	200150	75209	Non-CGI	TRUE	TRUE	FALSE
cg02567958	chr22	37962818	37962819	CDC42EP1	11135	6346	CGI-S-Shore	FALSE	TRUE	FALSE
cg02568153	chr7	2184201	2184202	MAD1L1	8379	88380	CGI-S-Shore	FALSE	TRUE	FALSE
cg02569115	chr17	76922138	76922139	TIMP2	7077	-665	CGI-S-Shore	TRUE	FALSE	FALSE
cg02571055	chr6	158896790	158896791	TMEM181	57583	-60676	Non-CGI	FALSE	TRUE	FALSE
cg02575764	chr12	63086511	63086512	MIRLET7I	406891	89044	Non-CGI	FALSE	TRUE	FALSE
cg02578535	chr3	57755895	57755896	SLMAP	7871	12720	Non-CGI	FALSE	TRUE	FALSE
cg02585329	chr6	89294475	89294476	RNGTT	8732	378871	CGI-N-Shelf	FALSE	FALSE	TRUE
cg02586910	chr12	6314603	6314604	CD9	928	5120	Non-CGI	FALSE	TRUE	FALSE
cg02588889	chr10	124829211	124829212	ACADSB	36	60781	Non-CGI	FALSE	FALSE	TRUE
cg02591564	chr12	125578355	125578356	AACS	65985	28429	CGI	FALSE	TRUE	FALSE
cg02592525	chr13	25740027	25740028	AMER2	219287	6276	Non-CGI	FALSE	FALSE	TRUE
cg02593403	chr10	102278918	102278919	SEC31B	25956	10716	CGI-N-Shore	FALSE	TRUE	FALSE
cg02596499	chr7	130724683	130724684	FLJ43663	378805	69968	Non-CGI	FALSE	TRUE	FALSE
cg02598071	chr2	191271975	191271976	MFSD6	54842	-1104	CGI-N-Shore	TRUE	FALSE	FALSE
cg02598335	chr7	86337918	86337919	GRM3	2913	64687	Non-CGI	FALSE	TRUE	FALSE
cg02598756	chr7	45126148	45126149	NACAD	23148	2343	CGI-N-Shore	FALSE	TRUE	FALSE
cg02603876	chr16	30689847	30689848	FBRS	64319	18603	Non-CGI	FALSE	FALSE	TRUE
cg02605292	chr17	9936785	9936786	RCVRN	5957	-128100	Non-CGI	FALSE	TRUE	FALSE
cg02607237	chr10	134801360	134801361	NA	255352	-45270	CGI-S-Shore	FALSE	FALSE	TRUE
cg02610064	chr11	67179310	67179311	CARNS1	57571	-3837	CGI-S-Shelf	FALSE	TRUE	FALSE
cg02611282	chr7	28338985	28338986	CREB5	9586	44	Non-CGI	TRUE	FALSE	FALSE
cg02612270	chr16	1015103	1015104	LMF1	64788	16213	CGI	FALSE	TRUE	FALSE
cg02612971	chr22	24190721	24190722	SLC2A11	66035	-8336	CGI-N-Shore	FALSE	FALSE	TRUE
cg02613295	chr7	2564256	2564257	MIR4648	100616116	-2450	CGI	FALSE	TRUE	FALSE
cg02614372	chr7	8486611	8486612	NXPH1	30010	13025	CGI-S-Shelf	FALSE	TRUE	FALSE
cg02619656	chr16	72460083	72460084	PMFBP1	83449	-253733	CGI	TRUE	FALSE	FALSE
cg02620054	chr10	133946674	133946675	JAKMIP3	282973	28360	CGI-N-Shore	FALSE	TRUE	FALSE
cg02621481	chr13	50931836	50931837	ST13P4	145165	185681	Non-CGI	FALSE	TRUE	FALSE
cg02621528	chr3	133464047	133464048	SRPRB	58477	-38828	CGI-N-Shore	TRUE	TRUE	FALSE
cg02621779	chr19	42698077	42698078	DEDD2	162989	23734	CGI-N-Shelf	FALSE	FALSE	TRUE
cg02625590	chr19	41880276	41880277	BCKDHA	593	-2160	CGI-N-Shore	FALSE	TRUE	FALSE
cg02625749	chr16	75505953	75505954	TMEM170A	124491	-7368	Non-CGI	FALSE	FALSE	TRUE
cg02627227	chr6	161664638	161664639	AGPAT4	56895	30467	Non-CGI	FALSE	TRUE	FALSE
cg02627405	chr5	156883553	156883554	NIPAL4	348938	-3472	CGI-N-Shelf	FALSE	TRUE	FALSE
cg02628016	chr3	183382726	183382727	KLHL24	54800	29314	Non-CGI	FALSE	TRUE	FALSE
cg02629470	chr17	11165954	11165955	SHISA6	388336	21213	Non-CGI	FALSE	TRUE	FALSE
cg02630628	chr19	50116703	50116704	PRR12	57479	21790	Non-CGI	FALSE	TRUE	FALSE
cg02632542	chr17	72210669	72210670	TTYH2	94015	972	CGI-S-Shore	TRUE	TRUE	FALSE
cg02633036	chr15	92661549	92661550	SLCO3A1	28232	264610	Non-CGI	FALSE	TRUE	FALSE
cg02633817	chr19	35606732	35606733	FXYD3	5349	0	Non-CGI	TRUE	FALSE	FALSE
cg02635482	chr7	672108	672109	HEATR2	54919	-94228	CGI	FALSE	TRUE	FALSE
cg02637086	chr19	41117232	41117233	LTBP4	8425	18159	CGI-S-Shore	TRUE	TRUE	FALSE
cg02637343	chr16	69894572	69894573	MIR140	406932	-72410	Non-CGI	FALSE	TRUE	FALSE
cg02637537	chr8	22447181	22447182	C8orf58	541565	-9931	CGI-S-Shore	TRUE	TRUE	FALSE
cg02638523	chr2	236548728	236548729	AGAP1	116987	145994	Non-CGI	FALSE	TRUE	FALSE
cg02640104	chr13	30476615	30476616	LINC00544	440131	-34051	Non-CGI	FALSE	FALSE	TRUE
cg02643580	chr12	95671146	95671147	MIR331	442903	-31048	Non-CGI	FALSE	TRUE	FALSE
cg02645993	chr6	170674463	170674464	MIR4644	100616430	34613	Non-CGI	FALSE	TRUE	FALSE
cg02646433	chr3	99218170	99218171	COL8A1	1295	-139282	Non-CGI	FALSE	FALSE	TRUE
cg02646515	chr2	128168987	128168988	PROC	5624	-7007	CGI-S-Shelf	FALSE	FALSE	TRUE
cg02647835	chr17	79952861	79952862	ASPSCR1	79058	17434	CGI	FALSE	TRUE	FALSE
cg02650127	chr6	74801378	74801379	CD109	135228	395869	Non-CGI	FALSE	TRUE	FALSE
cg02651288	chr10	132847005	132847006	MIR378C	100422867	-86073	Non-CGI	FALSE	FALSE	TRUE
cg02652361	chr11	65263917	65263918	MALAT1	378938	-1314	CGI-N-Shore	TRUE	FALSE	FALSE
cg02656609	chr17	57228618	57228619	MIR301A	407027	-35	CGI-N-Shelf	TRUE	TRUE	FALSE
cg02656871	chr16	88442535	88442536	ZNF469	84627	-51342	CGI	FALSE	FALSE	TRUE
cg02657160	chr3	98311063	98311064	CPOX	1371	1390	CGI-N-Shore	FALSE	TRUE	FALSE
cg02664177	chr7	537828	537829	PDGFA	5154	21651	CGI	FALSE	TRUE	FALSE
cg02665578	chr20	62153239	62153240	PPDPF	79144	1105	CGI	FALSE	TRUE	FALSE
cg02670343	chr1	51888289	51888290	TTC39A	22996	-77503	Non-CGI	TRUE	TRUE	FALSE
cg02671826	chr6	157191263	157191264	MIR4466	100616154	-90397	Non-CGI	FALSE	TRUE	FALSE
cg02673850	chr1	211828484	211828485	NEK2	4751	20486	Non-CGI	FALSE	FALSE	TRUE
cg02673901	chr1	204828056	204828057	NFASC	23114	30273	Non-CGI	FALSE	TRUE	FALSE
cg02674474	chr20	9818397	9818398	PAK7	57144	1288	CGI-N-Shore	FALSE	TRUE	FALSE
cg02674925	chr1	233474079	233474080	KIAA1804	84451	10564	Non-CGI	FALSE	TRUE	FALSE
cg02676262	chr10	134527606	134527607	NKX6-2	84504	71929	CGI	FALSE	TRUE	FALSE
cg02679503	chr2	42794680	42794681	MTA3	57504	72970	CGI-N-Shore	TRUE	TRUE	FALSE
cg02680669	chr8	40181105	40181106	C8orf4	56892	170117	Non-CGI	FALSE	FALSE	TRUE
cg02683371	chr4	56298893	56298894	TMEM165	55858	36802	Non-CGI	TRUE	TRUE	FALSE
cg02691934	chr10	128209602	128209603	ADAM12	8038	-132474	Non-CGI	FALSE	TRUE	FALSE
cg02692808	chr11	121712689	121712690	MIR125B1	406911	257861	Non-CGI	FALSE	FALSE	TRUE
cg02695677	chr7	130673538	130673539	LOC646329	646329	-75468	Non-CGI	FALSE	TRUE	FALSE
cg02696067	chr6	30850977	30850978	DDR1	780	282	CGI-N-Shore	TRUE	TRUE	FALSE
cg02698886	chr6	24360603	24360604	KAAG1	353219	3471	CGI-S-Shore	FALSE	TRUE	FALSE
cg02699915	chr11	44116952	44116953	EXT2	2132	19875	CGI-N-Shore	TRUE	TRUE	FALSE
cg02700106	chr10	671406	671407	PRR26	414235	-24480	CGI-S-Shore	FALSE	TRUE	FALSE
cg02702692	chr11	71724504	71724505	IL18BP	10068	14545	CGI-N-Shore	TRUE	TRUE	FALSE
cg02704103	chr3	72846991	72846992	SHQ1	55164	50605	Non-CGI	FALSE	TRUE	FALSE
cg02707152	chr11	64980819	64980820	SLC22A20	440044	-490	CGI-N-Shelf	TRUE	FALSE	FALSE
cg02708956	chr2	240300118	240300119	HDAC4	9759	23226	CGI	FALSE	TRUE	FALSE
cg02710534	chr5	141225619	141225620	PCDH1	5097	32323	CGI-N-Shelf	FALSE	FALSE	TRUE
cg02711872	chr7	150652702	150652703	KCNH2	3757	22698	CGI-N-Shore	TRUE	TRUE	FALSE
cg02711975	chr2	1344122	1344123	TPO	7173	-33871	Non-CGI	FALSE	TRUE	FALSE
cg02712949	chr8	87570714	87570715	CPNE3	8895	44057	Non-CGI	FALSE	TRUE	FALSE
cg02713883	chr7	75188876	75188877	PMS2P3	5387	-31422	CGI-N-Shore	FALSE	TRUE	FALSE
cg02721065	chr8	120932635	120932636	DEPTOR	64798	46734	Non-CGI	FALSE	TRUE	FALSE
cg02722808	chr10	105595043	105595044	SH3PXD2A	9644	20119	Non-CGI	FALSE	TRUE	FALSE
cg02723558	chr11	27536073	27536074	BDNF-AS	497258	7673	Non-CGI	FALSE	TRUE	FALSE
cg02723617	chr7	150755897	150755898	SLC4A2	6522	597	CGI-S-Shore	TRUE	FALSE	FALSE
cg02723688	chr6	33163745	33163746	COL11A2	1302	-3499	CGI-S-Shelf	FALSE	TRUE	FALSE
cg02727079	chr6	17986167	17986168	KIF13A	63971	1685	CGI-N-Shore	FALSE	TRUE	FALSE
cg02730865	chr16	80972238	80972239	CENPN	55839	-67863	Non-CGI	FALSE	FALSE	TRUE
cg02732915	chr4	81120670	81120671	PRDM8	56978	15230	CGI-S-Shore	FALSE	TRUE	FALSE
cg02733994	chr8	141600191	141600192	2002-08-01	27161	45453	CGI	FALSE	TRUE	FALSE
cg02734001	chr15	57551709	57551710	LOC283663	283663	-40852	Non-CGI	FALSE	TRUE	FALSE
cg02735486	chr4	113970935	113970936	MIR1243	100302188	-57082	Non-CGI	TRUE	TRUE	FALSE
cg02735620	chr4	88950514	88950515	PKD2	5311	21714	Non-CGI	FALSE	TRUE	FALSE
cg02735684	chr16	12665018	12665019	MIR4718	100616195	-149158	CGI-S-Shelf	FALSE	TRUE	FALSE
cg02738255	chr20	25231685	25231686	PYGB	5834	2978	CGI-S-Shelf	FALSE	TRUE	FALSE
cg02738272	chr4	41645242	41645243	PHOX2B	8929	105743	CGI-N-Shore	FALSE	TRUE	FALSE
cg02742281	chr16	3027577	3027578	PKMYT1	9088	2961	CGI-N-Shelf	TRUE	TRUE	FALSE
cg02742775	chr12	110156442	110156443	FAM222A	84915	4254	CGI	FALSE	TRUE	FALSE
cg02744705	chr4	151178090	151178091	DCLK2	166614	178663	CGI	FALSE	TRUE	FALSE
cg02746110	chr2	25552398	25552399	MIR1301	100302246	-807	Non-CGI	TRUE	TRUE	FALSE
cg02746748	chr4	906741	906742	GAK	2580	19431	CGI-S-Shore	TRUE	TRUE	FALSE
cg02747901	chr5	157005623	157005624	ADAM19	8728	-2839	CGI-S-Shelf	FALSE	FALSE	TRUE
cg02750065	chr12	117155382	117155383	C12orf49	79794	20459	CGI	FALSE	TRUE	FALSE
cg02751839	chr1	202092285	202092286	GPR37L1	9283	255	Non-CGI	TRUE	FALSE	FALSE
cg02753187	chr17	46919180	46919181	CALCOCO2	10241	10807	Non-CGI	FALSE	TRUE	FALSE
cg02755131	chr16	82673726	82673727	CDH13	1012	13326	Non-CGI	FALSE	TRUE	FALSE
cg02756176	chr4	187491362	187491363	MTNR1A	4543	-14824	CGI	FALSE	FALSE	TRUE
cg02757236	chr2	158182140	158182141	ERMN	57471	2004	Non-CGI	TRUE	TRUE	FALSE
cg02759531	chr7	28862462	28862463	LOC100506497	100506497	-157119	Non-CGI	FALSE	TRUE	FALSE
cg02759725	chr8	133072665	133072666	OC90	729330	-1037	Non-CGI	TRUE	FALSE	FALSE
cg02760962	chr11	35683421	35683422	TRIM44	54765	-930	CGI-N-Shore	TRUE	FALSE	FALSE
cg02761308	chr17	56071963	56071964	VEZF1	7716	-6347	Non-CGI	TRUE	FALSE	FALSE
cg02763671	chr22	20103541	20103542	TRMT2A	27037	1225	CGI-N-Shore	TRUE	TRUE	FALSE
cg02764093	chr12	120241760	120241761	CIT	11113	73333	CGI	FALSE	TRUE	FALSE
cg02765343	chr10	126331238	126331239	FAM53B	9679	147667	CGI-N-Shore	FALSE	TRUE	FALSE
cg02765363	chr17	80200741	80200742	SLC16A3	9123	14458	CGI	FALSE	TRUE	FALSE
cg02765535	chr12	96149803	96149804	NTN4	59277	35125	Non-CGI	FALSE	TRUE	FALSE
cg02769206	chr12	109210684	109210685	SSH1	54434	40673	Non-CGI	FALSE	TRUE	FALSE
cg02770252	chr6	14450312	14450313	CD83	9308	332824	Non-CGI	FALSE	FALSE	TRUE
cg02770672	chr6	164366085	164366086	QKI	9444	530409	Non-CGI	FALSE	FALSE	TRUE
cg02772099	chr10	126331180	126331181	FAM53B	9679	147725	CGI-N-Shore	FALSE	TRUE	FALSE
cg02772430	chr13	84454495	84454496	SLITRK1	114798	2031	CGI	TRUE	FALSE	FALSE
cg02773671	chr13	24566085	24566086	SPATA13	221178	12245	Non-CGI	FALSE	TRUE	FALSE
cg02774282	chr6	109615419	109615420	CCDC162P	221262	-85	CGI-S-Shelf	TRUE	FALSE	FALSE
cg02782895	chr3	127348828	127348829	PODXL2	50512	788	CGI	FALSE	TRUE	FALSE
cg02785332	chr9	94647670	94647671	ROR2	4920	64772	CGI-N-Shore	FALSE	TRUE	FALSE
cg02787120	chr7	111200944	111200945	IMMP2L	83943	1627	CGI-N-Shore	FALSE	TRUE	FALSE
cg02788195	chr10	60966072	60966073	PHYHIPL	84457	29723	Non-CGI	FALSE	TRUE	FALSE
cg02790305	chr4	186732932	186732933	SORBS2	8470	144936	CGI	TRUE	TRUE	FALSE
cg02790691	chr18	32289550	32289551	DTNA	1837	216295	Non-CGI	TRUE	TRUE	FALSE
cg02793828	chr16	85196116	85196117	LOC400548	400548	25359	CGI	FALSE	FALSE	TRUE
cg02794358	chr2	54816818	54816819	RPL23AP32	56969	60458	Non-CGI	FALSE	TRUE	FALSE
cg02794990	chr15	59659880	59659881	MYO1E	4643	5189	Non-CGI	FALSE	TRUE	FALSE
cg02795029	chr1	210111057	210111058	SYT14	255928	-479	CGI-N-Shore	TRUE	FALSE	FALSE
cg02799880	chr13	99630462	99630463	DOCK9	23348	108196	Non-CGI	TRUE	TRUE	FALSE
cg02802029	chr3	145879686	145879687	PLOD2	5352	-403	CGI	TRUE	FALSE	FALSE
cg02805025	chr7	95155053	95155054	ASB4	51666	39839	CGI-N-Shelf	FALSE	TRUE	FALSE
cg02805612	chr3	137228231	137228232	SOX14	8403	-254901	CGI-N-Shore	FALSE	FALSE	TRUE
cg02807192	chr17	75524111	75524112	LOC100507351	100507351	-18910	CGI	TRUE	FALSE	FALSE
cg02810660	chr17	76492206	76492207	DNAH17	8632	81268	CGI-S-Shore	TRUE	TRUE	FALSE
cg02810967	chr4	17813558	17813559	NCAPG	64151	1032	CGI-S-Shore	TRUE	TRUE	FALSE
cg02812487	chr12	125577625	125577626	AACS	65985	27699	CGI-N-Shore	FALSE	TRUE	FALSE
cg02815014	chr2	208791596	208791597	PLEKHM3	389072	98686	CGI-N-Shelf	FALSE	TRUE	FALSE
cg02816525	chr15	59024033	59024034	ADAM10	102	18142	Non-CGI	FALSE	TRUE	FALSE
cg02818170	chr19	3336941	3336942	NFIC	4782	-22618	Non-CGI	FALSE	FALSE	TRUE
cg02821342	chr7	130793551	130793552	FLJ43663	378805	1100	CGI-S-Shore	TRUE	TRUE	FALSE
cg02824064	chr7	4767580	4767581	AP5Z1	9907	-47680	CGI	FALSE	TRUE	FALSE
cg02825412	chr9	124985756	124985757	LHX6	26468	5333	CGI-S-Shelf	TRUE	TRUE	FALSE
cg02827278	chr12	122063043	122063044	ORAI1	84876	-1410	CGI-N-Shore	TRUE	FALSE	FALSE
cg02828878	chr10	90973635	90973636	CH25H	9023	-6563	Non-CGI	FALSE	TRUE	FALSE
cg02831419	chr2	223916622	223916623	KCNE4	23704	-238	CGI	TRUE	FALSE	FALSE
cg02832224	chr1	54825291	54825292	SSBP3	23648	46799	CGI-S-Shelf	FALSE	TRUE	FALSE
cg02832697	chr4	154126481	154126482	TRIM2	23321	52210	Non-CGI	FALSE	TRUE	FALSE
cg02832915	chr2	70188531	70188532	ASPRV1	151516	864	Non-CGI	TRUE	FALSE	FALSE
cg02833117	chr2	158182968	158182969	ERMN	57471	1176	Non-CGI	TRUE	TRUE	FALSE
cg02836764	chr10	134499364	134499365	NKX6-2	84504	100171	CGI	FALSE	TRUE	FALSE
cg02837935	chr16	1027604	1027605	LMF1	64788	3712	CGI	FALSE	TRUE	FALSE
cg02838877	chr13	97873877	97873878	MBNL2	10150	-695	Non-CGI	TRUE	FALSE	FALSE
cg02840697	chr8	24861141	24861142	NEFL	4747	-47009	CGI-S-Shore	FALSE	FALSE	TRUE
cg02840828	chr18	72201655	72201656	CNDP1	84735	-35	Non-CGI	TRUE	FALSE	FALSE
cg02841199	chr6	80247907	80247908	LCA5	167691	-759	CGI-S-Shore	TRUE	FALSE	FALSE
cg02842704	chr5	151305746	151305747	GLRA1	2741	-1348	CGI-S-Shore	TRUE	FALSE	FALSE
cg02844647	chr7	29519388	29519389	PRR15	222171	-84037	Non-CGI	TRUE	TRUE	FALSE
cg02848961	chr1	202091865	202091866	GPR37L1	9283	-162	Non-CGI	TRUE	FALSE	FALSE
cg02851873	chr10	80907003	80907004	ZMIZ1	57178	78210	Non-CGI	FALSE	TRUE	FALSE
cg02852959	chr12	2944436	2944437	NRIP2	83714	-214	Non-CGI	TRUE	FALSE	FALSE
cg02855302	chr14	103453791	103453792	AMN	81693	64797	CGI-S-Shelf	FALSE	TRUE	FALSE
cg02856124	chr3	112736847	112736848	C3orf17	25871	1706	CGI-N-Shore	FALSE	TRUE	FALSE
cg02857325	chr16	86564928	86564929	FOXF1	2294	20794	CGI-S-Shore	FALSE	TRUE	FALSE
cg02858826	chr14	75389222	75389223	RPS6KL1	83694	734	CGI-N-Shore	TRUE	TRUE	FALSE
cg02861178	chr20	10492319	10492320	SLX4IP	128710	76367	Non-CGI	FALSE	TRUE	FALSE
cg02861260	chr13	113614315	113614316	MCF2L	23263	-8462	CGI	FALSE	FALSE	TRUE
cg02863493	chr3	19549017	19549018	MIR4791	100616291	-192593	Non-CGI	FALSE	TRUE	FALSE
cg02865822	chr11	46383141	46383142	MIR4688	100616368	-14809	Non-CGI	TRUE	TRUE	FALSE
cg02866149	chr20	35405989	35405990	DSN1	79980	-3758	CGI-S-Shelf	FALSE	TRUE	FALSE
cg02866152	chr20	62795846	62795847	MYT1	4661	12701	CGI-S-Shore	TRUE	TRUE	FALSE
cg02869163	chr21	45364410	45364411	TRAPPC10	7109	-67794	CGI-S-Shore	FALSE	TRUE	FALSE
cg02872426	chr6	110736772	110736773	DDO	8528	-18	Non-CGI	TRUE	FALSE	FALSE
cg02872914	chr10	126713578	126713579	MIR4296	100423041	7859	CGI	FALSE	TRUE	FALSE
cg02873421	chr17	46629306	46629307	HOXB2	3212	-6912	CGI	FALSE	TRUE	FALSE
cg02875185	chr7	130788584	130788585	FLJ43663	378805	6067	CGI-N-Shore	FALSE	TRUE	FALSE
cg02876293	chr7	157456001	157456002	MIR153-2	406945	-88886	CGI	FALSE	TRUE	FALSE
cg02881189	chr9	35111032	35111033	FAM214B	80256	4859	CGI-N-Shore	TRUE	TRUE	FALSE
cg02881795	chr16	15959837	15959838	MYH11	4629	-8949	Non-CGI	FALSE	TRUE	FALSE
cg02882004	chr2	201334663	201334664	KCTD18	130535	40127	Non-CGI	FALSE	TRUE	FALSE
cg02883783	chr2	586210	586211	TMEM18	129787	91227	CGI-S-Shelf	FALSE	FALSE	TRUE
cg02886077	chr4	48779921	48779922	FRYL	285527	2393	CGI-N-Shore	FALSE	TRUE	FALSE
cg02887254	chr13	61165504	61165505	TDRD3	81550	194912	Non-CGI	FALSE	FALSE	TRUE
cg02888809	chr16	1692117	1692118	CRAMP1L	57585	27475	Non-CGI	FALSE	TRUE	FALSE
cg02892295	chr18	10470431	10470432	APCDD1	147495	15805	CGI-N-Shore	FALSE	TRUE	FALSE
cg02892577	chr10	121181759	121181760	MIR4681	100616398	44274	Non-CGI	FALSE	TRUE	FALSE
cg02892772	chr1	44991042	44991043	RNF220	55182	120081	Non-CGI	FALSE	TRUE	FALSE
cg02893260	chr13	30071603	30071604	SLC7A1	6541	98220	Non-CGI	FALSE	TRUE	FALSE
cg02901431	chr4	141207852	141207853	SCOC	60592	29411	Non-CGI	FALSE	TRUE	FALSE
cg02902637	chr1	37773903	37773904	MIR4255	100422898	146738	CGI	FALSE	FALSE	TRUE
cg02902915	chr1	111145889	111145890	KCNA2	3737	28205	CGI-N-Shelf	FALSE	TRUE	FALSE
cg02903680	chr15	85526198	85526199	PDE8A	5151	2453	CGI-S-Shore	FALSE	TRUE	FALSE
cg02905900	chr1	55013517	55013518	ACOT11	26027	5586	Non-CGI	TRUE	TRUE	FALSE
cg02910281	chr1	39407451	39407452	RHBDL2	54933	3	Non-CGI	TRUE	FALSE	FALSE
cg02912371	chr1	205913859	205913860	SLC26A9	115019	-1270	Non-CGI	TRUE	FALSE	FALSE
cg02913511	chr2	97454042	97454043	MIR3127	100422928	-9971	Non-CGI	TRUE	TRUE	FALSE
cg02914667	chr11	63894453	63894454	FLRT1	23769	23090	CGI	FALSE	TRUE	FALSE
cg02915215	chr8	134467165	134467166	ST3GAL1	6482	117016	CGI-S-Shore	FALSE	TRUE	FALSE
cg02915381	chr6	33163333	33163334	COL11A2	1302	-3087	CGI-S-Shelf	FALSE	TRUE	FALSE
cg02915920	chr9	133736469	133736470	QRFP	347148	32754	CGI-N-Shore	FALSE	TRUE	FALSE
cg02918593	chr14	105184145	105184146	ADSSL1	122622	-6387	CGI	FALSE	TRUE	FALSE
cg02919122	chr3	112109797	112109798	CD200	4345	57880	Non-CGI	FALSE	FALSE	TRUE
cg02922879	chr1	94270127	94270128	MIR760	100126348	-42259	Non-CGI	FALSE	TRUE	FALSE
cg02923485	chr1	223959609	223959610	CAPN2	824	70313	Non-CGI	FALSE	TRUE	FALSE
cg02923856	chr3	23989124	23989125	NKIRAS1	28512	-1070	CGI-S-Shore	TRUE	TRUE	FALSE
cg02926868	chr11	66374763	66374764	RBM14-RBM4	100526737	-9288	Non-CGI	FALSE	FALSE	TRUE
cg02927042	chr1	21476669	21476670	EIF4G3	8672	26710	Non-CGI	FALSE	TRUE	FALSE
cg02927058	chr1	10116780	10116781	UBE4B	10277	23738	Non-CGI	FALSE	TRUE	FALSE
cg02927074	chr15	80860549	80860550	FAM108C1	58489	-127101	Non-CGI	FALSE	TRUE	FALSE
cg02927747	chr18	60381593	60381594	PHLPP1	23239	-1077	CGI-N-Shore	TRUE	FALSE	FALSE
cg02927821	chr17	39216677	39216678	KRTAP2-3	730755	-332	Non-CGI	TRUE	FALSE	FALSE
cg02930721	chr16	89375113	89375114	LOC100287036	100287036	-12426	CGI-S-Shore	FALSE	TRUE	FALSE
cg02932355	chr8	102184648	102184649	ZNF706	51123	33310	Non-CGI	FALSE	FALSE	TRUE
cg02934719	chr16	66545712	66545713	TK2	7084	38601	CGI-N-Shelf	FALSE	TRUE	FALSE
cg02936049	chr3	141102599	141102600	ZBTB38	253461	59543	Non-CGI	FALSE	TRUE	FALSE
cg02937055	chr3	171489625	171489626	PLD1	5337	38877	Non-CGI	FALSE	TRUE	FALSE
cg02939078	chr20	61489595	61489596	TCFL5	10732	3518	CGI	FALSE	TRUE	FALSE
cg02939659	chr14	102054070	102054071	DIO3	1735	26381	CGI	FALSE	FALSE	TRUE
cg02942825	chr19	46185348	46185349	MIR642B	100500845	-7081	CGI-S-Shore	FALSE	TRUE	FALSE
cg02945385	chr3	9246501	9246502	SRGAP3	9901	44808	Non-CGI	FALSE	TRUE	FALSE
cg02951739	chr1	20807386	20807387	CAMK2N1	55450	5340	CGI-N-Shelf	FALSE	FALSE	TRUE
cg02951847	chr4	41614490	41614491	PHOX2B	8929	136495	Non-CGI	TRUE	TRUE	FALSE
cg02951883	chr7	2050386	2050387	MIR4655	100616160	-166496	CGI	FALSE	TRUE	FALSE
cg02953559	chr3	123164964	123164965	ADCY5	111	2426	CGI-N-Shore	FALSE	TRUE	FALSE
cg02953912	chr11	2904591	2904592	CDKN1C	1028	2402	CGI	FALSE	TRUE	FALSE
cg02954123	chr7	141695316	141695317	MGAM	8972	-361	Non-CGI	TRUE	FALSE	FALSE
cg02957305	chr14	51452451	51452452	PYGL	5836	-41202	CGI-S-Shelf	FALSE	TRUE	FALSE
cg02960418	chr7	537803	537804	PDGFA	5154	21676	CGI	FALSE	TRUE	FALSE
cg02961807	chr11	64411504	64411505	SLC22A12	116085	53221	CGI-S-Shore	TRUE	TRUE	FALSE
cg02962647	chr6	158655004	158655005	GTF2H5	404672	65624	CGI-S-Shore	FALSE	FALSE	TRUE
cg02963266	chr14	99681710	99681711	BCL11B	64919	56110	CGI-N-Shore	FALSE	TRUE	FALSE
cg02965411	chr12	71551926	71551927	PTPRR	5801	-237341	Non-CGI	TRUE	TRUE	FALSE
cg02966475	chr16	65105516	65105517	CDH11	1009	50401	CGI-N-Shore	FALSE	TRUE	FALSE
cg02966899	chr15	64793532	64793533	ZNF609	23060	1912	Non-CGI	FALSE	TRUE	FALSE
cg02968918	chr4	184908541	184908542	STOX2	56977	82031	CGI	FALSE	TRUE	FALSE
cg02969422	chr6	138484687	138484688	KIAA1244	57221	1633	CGI-S-Shore	FALSE	TRUE	FALSE
cg02973883	chr14	73392314	73392315	DCAF4	26094	-724	CGI	TRUE	FALSE	FALSE
cg02974898	chr1	23105600	23105601	MIR4684	100616391	59589	Non-CGI	FALSE	TRUE	FALSE
cg02976539	chr17	72757302	72757303	SLC9A3R1	9368	12538	Non-CGI	FALSE	TRUE	FALSE
cg02977388	chr10	90253615	90253616	RNLS	55328	89465	Non-CGI	FALSE	TRUE	FALSE
cg02977955	chr17	76760976	76760977	CYTH1	9267	17398	Non-CGI	FALSE	TRUE	FALSE
cg02978505	chr16	85292322	85292323	LINC00311	197196	-24240	CGI-N-Shelf	FALSE	FALSE	TRUE
cg02985293	chr19	2064854	2064855	MKNK2	2872	-13610	CGI-N-Shore	FALSE	FALSE	TRUE
cg02985445	chr7	97908505	97908506	BRI3	25798	-2472	CGI-N-Shore	FALSE	FALSE	TRUE
cg02990302	chr16	58155189	58155190	C16orf80	29105	8105	Non-CGI	FALSE	TRUE	FALSE
cg02990474	chr20	49416093	49416094	BCAS4	55653	4625	CGI-S-Shelf	FALSE	TRUE	FALSE
cg02991558	chr11	114128517	114128518	NNMT	4837	-34	Non-CGI	TRUE	FALSE	FALSE
cg02991753	chr4	119961172	119961173	MYOZ2	51778	-95765	Non-CGI	FALSE	TRUE	FALSE
cg02992705	chr16	88599613	88599614	ZC3H18	124245	-37174	CGI-S-Shore	FALSE	TRUE	FALSE
cg02994463	chr13	58240705	58240706	PCDH17	27253	34915	Non-CGI	TRUE	TRUE	FALSE
cg02997796	chr11	82781482	82781483	RAB30	27314	1400	CGI-N-Shore	TRUE	TRUE	FALSE
cg02997851	chr3	97542295	97542296	ARL6	84100	58699	CGI-S-Shore	FALSE	TRUE	FALSE
cg03001305	chr17	40439492	40439493	STAT5A	6776	-71	CGI-N-Shore	TRUE	FALSE	FALSE
cg03001333	chr1	2005560	2005561	PRKCZ	5590	23650	CGI	TRUE	TRUE	FALSE
cg03003394	chr2	208026398	208026399	KLF7	8609	5171	CGI-N-Shelf	FALSE	TRUE	FALSE
cg03004860	chr16	85684468	85684469	GINS2	51659	38118	CGI	FALSE	TRUE	FALSE
cg03005293	chr1	151805241	151805242	RORC	6097	-892	Non-CGI	TRUE	FALSE	FALSE
cg03008387	chr20	62089152	62089153	KCNQ2	3785	14839	CGI-S-Shore	FALSE	TRUE	FALSE
cg03009240	chr19	3507867	3507868	FZR1	51343	1571	CGI	FALSE	TRUE	FALSE
cg03010009	chr13	80585265	80585266	SPRY2	10253	329819	Non-CGI	FALSE	FALSE	TRUE
cg03012374	chr15	38998010	38998011	C15orf53	400359	9210	Non-CGI	FALSE	FALSE	TRUE
cg03012521	chr8	9260335	9260336	LOC157273	157273	77773	Non-CGI	FALSE	FALSE	TRUE
cg03013070	chr10	95965579	95965580	LOC100128054	100128054	81246	Non-CGI	FALSE	TRUE	FALSE
cg03014882	chr19	18120728	18120729	ARRDC2	27106	8783	CGI	FALSE	TRUE	FALSE
cg03015952	chr19	55987366	55987367	ZNF628	89887	-331	CGI-N-Shore	TRUE	FALSE	FALSE
cg03016867	chr5	148442890	148442891	SH3TC2	79628	-152	Non-CGI	TRUE	FALSE	FALSE
cg03017850	chr2	54797285	54797286	RPL23AP32	56969	40925	Non-CGI	FALSE	TRUE	FALSE
cg03018256	chr17	72237019	72237020	TTYH2	94015	27322	Non-CGI	FALSE	TRUE	FALSE
cg03018679	chr12	120241922	120241923	CIT	11113	73171	CGI	TRUE	TRUE	FALSE
cg03023465	chr11	131160689	131160690	NTM	50863	-79680	Non-CGI	FALSE	FALSE	TRUE
cg03025986	chr2	3292757	3292758	TSSC1	7260	88894	CGI	FALSE	TRUE	FALSE
cg03027239	chr3	42700285	42700286	ZBTB47	92999	5108	CGI	FALSE	TRUE	FALSE
cg03027241	chr20	49620453	49620454	KCNG1	3755	19220	CGI-N-Shore	FALSE	TRUE	FALSE
cg03029752	chr11	119038708	119038709	NLRX1	79671	-727	CGI-N-Shore	TRUE	FALSE	FALSE
cg03032122	chr11	9337659	9337660	TMEM41B	440026	-1343	CGI-S-Shore	TRUE	FALSE	FALSE
cg03032180	chr3	194979346	194979347	XXYLT1	152002	12547	CGI-N-Shore	FALSE	TRUE	FALSE
cg03032443	chr19	6280893	6280894	MLLT1	4298	-933	CGI-S-Shore	TRUE	FALSE	FALSE
cg03032512	chr17	77030418	77030419	LOC100507410	100507410	-6680	Non-CGI	TRUE	TRUE	FALSE
cg03034696	chr2	47400023	47400024	C2orf61	285051	3715	CGI-N-Shelf	FALSE	TRUE	FALSE
cg03035167	chr2	201336269	201336270	KCTD18	130535	38521	Non-CGI	FALSE	TRUE	FALSE
cg03040489	chr11	69463323	69463324	CCND1	595	7449	CGI	FALSE	TRUE	FALSE
cg03042477	chr16	31472055	31472056	ARMC5	79798	2460	CGI-S-Shore	FALSE	TRUE	FALSE
cg03042633	chr1	2183365	2183366	SKI	6497	23230	CGI	FALSE	TRUE	FALSE
cg03047059	chr1	210567887	210567888	HHAT	55733	66290	Non-CGI	FALSE	TRUE	FALSE
cg03048488	chr1	15733844	15733845	EFHD2	79180	-2545	CGI-N-Shelf	FALSE	FALSE	TRUE
cg03051983	chr10	72044060	72044061	NPFFR1	64106	-609	CGI-S-Shore	TRUE	FALSE	FALSE
cg03052078	chr6	147527113	147527114	STXBP5-AS1	729178	-1362	CGI-S-Shore	TRUE	TRUE	FALSE
cg03052099	chr16	67951373	67951374	CTRL	1506	14403	Non-CGI	FALSE	TRUE	FALSE
cg03053290	chr1	95698378	95698379	RWDD3	25950	-1331	CGI-N-Shore	TRUE	TRUE	FALSE
cg03059174	chr20	42085839	42085840	SRSF6	6431	-663	CGI	TRUE	FALSE	FALSE
cg03059921	chr20	61451730	61451731	COL9A3	1299	3315	CGI-S-Shelf	FALSE	TRUE	FALSE
cg03059991	chr12	54144785	54144786	CALCOCO1	57658	-23477	CGI	FALSE	FALSE	TRUE
cg03061778	chr10	10337051	10337052	SFTA1P	207107	499824	CGI	FALSE	FALSE	TRUE
cg03065165	chr1	228337503	228337504	GJC2	57165	87	Non-CGI	TRUE	FALSE	FALSE
cg03066080	chr17	77539424	77539425	RBFOX3	146713	-60743	CGI	FALSE	FALSE	TRUE
cg03066664	chr19	17560831	17560832	TMEM221	100130519	-1454	CGI-S-Shore	TRUE	FALSE	FALSE
cg03070236	chr16	4012997	4012998	CREBBP	1387	-82875	CGI	FALSE	TRUE	FALSE
cg03070741	chr19	2650727	2650728	GNG7	2788	52017	CGI	FALSE	TRUE	FALSE
cg03072569	chr16	76309968	76309969	CNTNAP4	85445	-1206	Non-CGI	TRUE	FALSE	FALSE
cg03072665	chr2	242501706	242501707	BOK-AS1	100379249	-3147	CGI-S-Shelf	FALSE	TRUE	FALSE
cg03082234	chr7	73926031	73926032	GTF2IRD1	9569	57910	Non-CGI	FALSE	TRUE	FALSE
cg03082247	chr8	6756796	6756797	DEFB1	1672	-21266	CGI	FALSE	FALSE	TRUE
cg03082741	chr16	87756170	87756171	KLHDC4	54758	43426	CGI-S-Shore	FALSE	TRUE	FALSE
cg03090969	chr8	104117866	104117867	BAALC	79870	-35053	Non-CGI	FALSE	FALSE	TRUE
cg03092825	chr2	58768112	58768113	FLJ30838	400955	20223	Non-CGI	FALSE	TRUE	FALSE
cg03099780	chr13	97864475	97864476	MBNL2	10150	-10097	Non-CGI	FALSE	FALSE	TRUE
cg03100044	chr7	29519450	29519451	PRR15	222171	-83975	Non-CGI	TRUE	TRUE	FALSE
cg03100686	chr10	22992381	22992382	PIP4K2A	5305	11120	Non-CGI	FALSE	TRUE	FALSE
cg03101058	chr17	71258936	71258937	CPSF4L	642843	-916	Non-CGI	TRUE	FALSE	FALSE
cg03102824	chr1	51703649	51703650	RNF11	26994	1703	CGI-S-Shore	FALSE	TRUE	FALSE
cg03103661	chr11	15865375	15865376	INSC	387755	731404	Non-CGI	FALSE	FALSE	TRUE
cg03103919	chr10	18629674	18629675	CACNB2	783	200067	Non-CGI	TRUE	TRUE	FALSE
cg03104309	chr19	51052080	51052081	LRRC4B	94030	19220	CGI	FALSE	TRUE	FALSE
cg03106717	chr1	25152974	25152975	CLIC4	25932	81213	Non-CGI	FALSE	TRUE	FALSE
cg03107310	chr10	86094757	86094758	CCSER2	54462	6346	Non-CGI	FALSE	TRUE	FALSE
cg03109921	chr17	40820189	40820190	PLEKHH3	79990	8857	CGI-N-Shore	FALSE	TRUE	FALSE
cg03111114	chr5	149886185	149886186	NDST1	3340	8844	Non-CGI	TRUE	TRUE	FALSE
cg03114845	chr12	66270387	66270388	RPSAP52	204010	-49632	Non-CGI	FALSE	TRUE	FALSE
cg03115444	chr12	122835060	122835061	LOC100507066	100507066	-45027	Non-CGI	FALSE	TRUE	FALSE
cg03117697	chr4	148491949	148491950	TMEM184C	55751	-46588	Non-CGI	FALSE	FALSE	TRUE
cg03123320	chr1	229394665	229394666	RAB4A	5867	-12212	Non-CGI	FALSE	FALSE	TRUE
cg03123979	chr16	1041053	1041054	SOX8	30812	9244	CGI-S-Shore	FALSE	FALSE	TRUE
cg03124510	chr10	6216434	6216435	MIR3155B	100628560	-22208	Non-CGI	FALSE	TRUE	FALSE
cg03125531	chr8	1906418	1906419	KBTBD11	9920	-15624	CGI	FALSE	TRUE	FALSE
cg03125765	chr22	30686808	30686809	GATSL3	652968	8730	CGI-S-Shore	TRUE	TRUE	FALSE
cg03126058	chr1	3282757	3282758	ARHGEF16	27237	-88388	CGI	FALSE	TRUE	FALSE
cg03126765	chr16	3125838	3125839	IL32	9235	10524	Non-CGI	FALSE	FALSE	TRUE
cg03127370	chr16	2520192	2520193	NTN3	4917	-1306	CGI-S-Shore	TRUE	FALSE	FALSE
cg03127584	chr13	114797865	114797866	RASA3	22821	100228	CGI	FALSE	TRUE	FALSE
cg03128499	chr17	67457828	67457829	MAP2K6	5608	46989	Non-CGI	FALSE	TRUE	FALSE
cg03128890	chr8	122558224	122558225	HAS2-AS1	594842	-93360	Non-CGI	FALSE	FALSE	TRUE
cg03131736	chr19	50985397	50985398	FAM71E1	112703	-5393	CGI-N-Shore	FALSE	TRUE	FALSE
cg03134962	chr16	31083405	31083406	ZNF668	79759	2234	CGI-N-Shore	FALSE	TRUE	FALSE
cg03135023	chr11	2871856	2871857	KCNQ1DN	55539	-19405	CGI	FALSE	FALSE	TRUE
cg03135577	chr11	45928988	45928989	C11orf94	143678	-154	Non-CGI	TRUE	FALSE	FALSE
cg03136563	chr19	35532097	35532098	HPN	3249	686	CGI-S-Shore	FALSE	TRUE	FALSE
cg03136781	chr2	234197367	234197368	SCARNA6	677772	44	Non-CGI	TRUE	TRUE	FALSE
cg03138124	chr2	68290812	68290813	C1D	10438	-652	CGI-S-Shore	TRUE	FALSE	FALSE
cg03138928	chr1	226004826	226004827	EPHX1	2052	7028	Non-CGI	FALSE	TRUE	FALSE
cg03139388	chr17	79394412	79394413	MIR4740	100616294	-19833	CGI-S-Shore	FALSE	TRUE	FALSE
cg03140118	chr1	37939320	37939321	LOC728431	728431	722	CGI-N-Shore	TRUE	TRUE	FALSE
cg03141679	chr1	214170374	214170375	PROX1	5629	9087	CGI-N-Shore	FALSE	TRUE	FALSE
cg03142554	chr6	82958230	82958231	IBTK	25998	-781	CGI-S-Shore	TRUE	FALSE	FALSE
cg03146155	chr6	134588828	134588829	SGK1	6446	50366	Non-CGI	FALSE	TRUE	FALSE
cg03147430	chr16	81929395	81929396	SDR42E1	93517	115696	CGI	FALSE	TRUE	FALSE
cg03147907	chr3	62926690	62926691	LINC00698	285401	-9441	Non-CGI	FALSE	FALSE	TRUE
cg03148889	chr1	78706562	78706563	MGC27382	149047	11278	Non-CGI	FALSE	TRUE	FALSE
cg03149567	chr10	134441442	134441443	INPP5A	3632	90088	CGI	FALSE	TRUE	FALSE
cg03149958	chr6	36326677	36326678	C6orf222	389384	-22014	Non-CGI	FALSE	TRUE	FALSE
cg03151294	chr4	189220624	189220625	LOC401164	401164	-101264	Non-CGI	FALSE	FALSE	TRUE
cg03152084	chr16	87352229	87352230	C16orf95	100506581	-1202	CGI-S-Shore	TRUE	FALSE	FALSE
cg03156546	chr16	24759640	24759641	TNRC6A	27327	18590	Non-CGI	FALSE	TRUE	FALSE
cg03156547	chr14	23525003	23525004	CDH24	64403	1742	CGI-N-Shore	TRUE	TRUE	FALSE
cg03157179	chr10	45282107	45282108	TMEM72	643236	-124655	Non-CGI	FALSE	FALSE	TRUE
cg03162410	chr19	14671422	14671423	NDUFB7	4713	11465	CGI-N-Shelf	FALSE	TRUE	FALSE
cg03162916	chr17	77003152	77003153	CANT1	124583	2745	CGI	FALSE	TRUE	FALSE
cg03163343	chr1	45118395	45118396	TMEM53	79639	21702	CGI-N-Shore	FALSE	FALSE	TRUE
cg03164243	chr17	17717894	17717895	MIR33B	693120	-648	CGI-S-Shore	TRUE	TRUE	FALSE
cg03167368	chr10	121285199	121285200	RGS10	6001	17021	Non-CGI	FALSE	TRUE	FALSE
cg03170343	chr17	77030327	77030328	LOC100507410	100507410	-6589	Non-CGI	TRUE	TRUE	FALSE
cg03171882	chr11	92511989	92511990	MTNR1B	4544	-190798	Non-CGI	FALSE	TRUE	FALSE
cg03172341	chr8	141577150	141577151	CHRAC1	54108	55752	CGI	FALSE	TRUE	FALSE
cg03173502	chr6	15505345	15505346	DTNBP1	84062	157942	CGI-S-Shore	FALSE	TRUE	FALSE
cg03174933	chr4	155720155	155720156	RBM46	166863	17727	Non-CGI	FALSE	TRUE	FALSE
cg03176993	chr3	188664887	188664888	TPRG1	285386	-114	CGI-N-Shore	TRUE	FALSE	FALSE
cg03182584	chr7	36364854	36364855	ANLN	54443	-64576	Non-CGI	FALSE	TRUE	FALSE
cg03184357	chr3	51575119	51575120	RAD54L2	23132	-475	CGI-S-Shore	TRUE	FALSE	FALSE
cg03187411	chr7	110482491	110482492	LRRN3	54674	-248569	Non-CGI	FALSE	TRUE	FALSE
cg03190825	chr19	16045788	16045789	CYP4F11	57834	-111	Non-CGI	TRUE	FALSE	FALSE
cg03191794	chr12	83102075	83102076	TMTC2	160335	21140	Non-CGI	FALSE	TRUE	FALSE
cg03193328	chr7	65746852	65746853	TPST1	8460	76592	Non-CGI	FALSE	TRUE	FALSE
cg03193847	chr4	169637496	169637497	PALLD	23022	219278	Non-CGI	FALSE	TRUE	FALSE
cg03201096	chr7	29518198	29518199	PRR15	222171	-85227	Non-CGI	TRUE	TRUE	FALSE
cg03203114	chr11	118505622	118505623	PHLDB1	23187	28408	CGI	FALSE	TRUE	FALSE
cg03204322	chr1	84767878	84767879	SAMD13	148418	3828	CGI-S-Shelf	TRUE	TRUE	FALSE
cg03204907	chr16	12272324	12272325	SNX29	92017	201721	Non-CGI	FALSE	TRUE	FALSE
cg03206660	chr11	134021905	134021906	NCAPD3	23310	72519	CGI-N-Shore	FALSE	FALSE	TRUE
cg03208489	chr11	63647865	63647866	RCOR2	283248	36449	Non-CGI	FALSE	TRUE	FALSE
cg03209459	chr17	44604660	44604661	LRRC37A2	474170	14583	Non-CGI	FALSE	TRUE	FALSE
cg03215160	chr6	29424926	29424927	OR2H1	26716	-1302	Non-CGI	TRUE	FALSE	FALSE
cg03218396	chr8	96377380	96377381	C8orf37	157657	-95917	Non-CGI	FALSE	TRUE	FALSE
cg03222176	chr1	96948323	96948324	PTBP2	58155	-238850	Non-CGI	FALSE	FALSE	TRUE
cg03223959	chr16	85382654	85382655	LOC727710	727710	-45651	CGI	FALSE	FALSE	TRUE
cg03224163	chr7	139420300	139420301	HIPK2	28996	57391	CGI-S-Shelf	FALSE	TRUE	FALSE
cg03224396	chr1	221017300	221017301	HLX	3142	-35441	Non-CGI	FALSE	FALSE	TRUE
cg03227338	chr11	46998965	46998966	C11orf49	79096	40713	Non-CGI	FALSE	TRUE	FALSE
cg03229538	chr1	173065092	173065093	TNFSF18	8995	-44988	Non-CGI	FALSE	FALSE	TRUE
cg03233876	chr19	575412	575413	BSG	682	4086	CGI	FALSE	TRUE	FALSE
cg03233918	chr4	84991657	84991658	NKX6-1	4825	427728	Non-CGI	FALSE	TRUE	FALSE
cg03235479	chr2	1859146	1859147	PXDN	7837	-110854	CGI	FALSE	TRUE	FALSE
cg03236534	chr13	113417204	113417205	ATP11A	23250	72560	CGI	FALSE	TRUE	FALSE
cg03238167	chr7	73818356	73818357	GTF2IRD1	9569	-49762	CGI-N-Shore	FALSE	TRUE	FALSE
cg03239422	chr13	21101018	21101019	CRYL1	51084	-1005	CGI-S-Shore	TRUE	FALSE	FALSE
cg03239970	chr16	75088935	75088936	ZNRF1	84937	56019	Non-CGI	FALSE	TRUE	FALSE
cg03240301	chr7	23387383	23387384	MALSU1	115416	48442	Non-CGI	TRUE	TRUE	FALSE
cg03240511	chr16	87979202	87979203	BANP	54971	-5034	CGI-S-Shore	FALSE	FALSE	TRUE
cg03242666	chr17	15168570	15168571	PMP22	5376	72	CGI-S-Shore	TRUE	FALSE	FALSE
cg03250947	chr6	32193107	32193108	NOTCH4	4855	-1262	Non-CGI	TRUE	FALSE	FALSE
cg03253303	chr17	29753081	29753082	RAB11FIP4	84440	34438	Non-CGI	FALSE	TRUE	FALSE
cg03255440	chr6	112683508	112683509	RFPL4B	442247	14975	CGI-N-Shelf	FALSE	FALSE	TRUE
cg03265991	chr16	66646895	66646896	CMTM3	123920	8959	Non-CGI	FALSE	TRUE	FALSE
cg03266780	chr6	70762024	70762025	COL19A1	1310	185575	Non-CGI	FALSE	TRUE	FALSE
cg03267026	chr11	1470086	1470087	BRSK2	9024	58956	CGI	TRUE	TRUE	FALSE
cg03268012	chr13	52207556	52207557	WDFY2	115825	49071	Non-CGI	FALSE	TRUE	FALSE
cg03270619	chr6	168418454	168418455	KIF25	3834	18681	CGI-S-Shore	TRUE	TRUE	FALSE
cg03271893	chr10	102760970	102760971	LZTS2	84445	4105	CGI-S-Shore	TRUE	TRUE	FALSE
cg03272066	chr8	94238457	94238458	C8orf87	389676	-59377	CGI-N-Shelf	FALSE	FALSE	TRUE
cg03272326	chr1	166136939	166136940	FAM78B	149297	-980	CGI-S-Shore	TRUE	FALSE	FALSE
cg03277925	chr10	1245951	1245952	LINC00200	399706	40242	CGI	TRUE	TRUE	FALSE
cg03280063	chr4	893186	893187	GAK	2580	32986	CGI-N-Shore	FALSE	TRUE	FALSE
cg03283124	chr13	67802272	67802273	PCDH9	5101	2194	CGI-N-Shelf	FALSE	TRUE	FALSE
cg03283421	chr10	124610984	124610985	LOC399815	399815	-1027	Non-CGI	TRUE	TRUE	FALSE
cg03285428	chr3	73050093	73050094	PPP4R2	151987	3973	CGI-S-Shelf	FALSE	TRUE	FALSE
cg03286535	chr15	90649835	90649836	IDH2	3418	-4126	CGI-S-Shelf	FALSE	FALSE	TRUE
cg03286735	chr4	906491	906492	GAK	2580	19681	CGI-S-Shore	TRUE	TRUE	FALSE
cg03287046	chr7	29519323	29519324	PRR15	222171	-84102	Non-CGI	TRUE	TRUE	FALSE
cg03288217	chr20	37464179	37464180	PPP1R16B	26051	29830	CGI-N-Shore	FALSE	TRUE	FALSE
cg03289906	chr7	94538408	94538409	PPP1R9A	55607	1458	CGI-S-Shore	TRUE	TRUE	FALSE
cg03290418	chr19	1881872	1881873	FAM108A1	81926	3644	CGI	TRUE	TRUE	FALSE
cg03294833	chr16	67918813	67918814	NRN1L	123904	31	Non-CGI	TRUE	FALSE	FALSE
cg03295107	chr7	151236292	151236293	RHEB	6009	-19281	Non-CGI	FALSE	FALSE	TRUE
cg03295554	chr11	128395450	128395451	ETS1	2113	62001	CGI-S-Shelf	FALSE	TRUE	FALSE
cg03296248	chr13	110918516	110918517	COL4A1	1282	40978	CGI	FALSE	TRUE	FALSE
cg03296283	chr1	2928403	2928404	ACTRT2	140625	-9641	CGI	FALSE	FALSE	TRUE
cg03298700	chr2	220295753	220295754	SPEG	10290	-3945	CGI-N-Shelf	FALSE	FALSE	TRUE
cg03298704	chr4	99427937	99427938	TSPAN5	10098	151873	Non-CGI	FALSE	TRUE	FALSE
cg03300078	chr11	1769522	1769523	IFITM10	402778	2300	CGI	FALSE	TRUE	FALSE
cg03300645	chr15	77223542	77223543	RCN2	5955	-418	CGI-N-Shore	TRUE	FALSE	FALSE
cg03301165	chr16	19712046	19712047	IQCK	124152	-15730	Non-CGI	FALSE	TRUE	FALSE
cg03303433	chr16	30061433	30061434	ALDOA	226	-2976	CGI-N-Shelf	FALSE	TRUE	FALSE
cg03310939	chr7	101688730	101688731	CUX1	1523	229545	Non-CGI	FALSE	TRUE	FALSE
cg03311274	chr15	58624344	58624345	ALDH1A2	8854	-52881	Non-CGI	FALSE	FALSE	TRUE
cg03313126	chr2	3705178	3705179	ALLC	55821	-606	CGI-S-Shore	TRUE	FALSE	FALSE
cg03315649	chr19	5093541	5093542	KDM4B	23030	124416	CGI	FALSE	TRUE	FALSE
cg03316934	chr2	220510231	220510232	SLC4A3	6508	17938	Non-CGI	FALSE	FALSE	TRUE
cg03318904	chr22	39801522	39801523	LOC100506472	100506472	-26641	CGI	FALSE	TRUE	FALSE
cg03320743	chr3	147657586	147657587	ZIC1	7545	530404	Non-CGI	TRUE	FALSE	FALSE
cg03321829	chr5	172295653	172295654	ERGIC1	57222	34429	Non-CGI	TRUE	TRUE	FALSE
cg03325522	chr8	30859349	30859350	WRN	7486	-31427	Non-CGI	FALSE	TRUE	FALSE
cg03325598	chr3	12994877	12994878	RPL32	6161	-111795	CGI	FALSE	TRUE	FALSE
cg03326410	chr6	64151739	64151740	PTP4A1	7803	-79910	CGI-N-Shore	FALSE	FALSE	TRUE
cg03330377	chr7	92242243	92242244	FAM133B	257415	-22536	Non-CGI	FALSE	TRUE	FALSE
cg03330678	chr17	75316233	75316234	2009-09-01	10801	38740	CGI	TRUE	TRUE	FALSE
cg03331514	chr7	1577016	1577017	MAFK	7975	6647	CGI	TRUE	TRUE	FALSE
cg03332701	chr15	63793652	63793653	USP3	9960	-3156	CGI-N-Shore	FALSE	FALSE	TRUE
cg03333699	chr7	966569	966570	ADAP1	11033	48664	CGI-S-Shore	FALSE	TRUE	FALSE
cg03334076	chr15	57309541	57309542	LOC145783	145783	-98843	Non-CGI	FALSE	TRUE	FALSE
cg03335128	chr1	1731415	1731416	NADK	65220	-19906	Non-CGI	FALSE	TRUE	FALSE
cg03338924	chr6	13015106	13015107	LOC100130357	100130357	280710	CGI	FALSE	TRUE	FALSE
cg03339077	chr11	47165057	47165058	ARFGAP2	84364	33617	Non-CGI	FALSE	TRUE	FALSE
cg03339668	chr12	120241957	120241958	CIT	11113	73136	CGI	TRUE	TRUE	FALSE
cg03340303	chr8	100230864	100230865	VPS13B	157680	205369	Non-CGI	FALSE	TRUE	FALSE
cg03341641	chr10	49810606	49810607	ARHGAP22	58504	53702	CGI-N-Shelf	FALSE	TRUE	FALSE
cg03342032	chr13	94725495	94725496	DCT	1638	406439	Non-CGI	FALSE	TRUE	FALSE
cg03346415	chr16	69854895	69854896	WWP2	11060	58620	Non-CGI	FALSE	TRUE	FALSE
cg03348466	chr15	91104770	91104771	CRTC3	64784	31571	Non-CGI	FALSE	TRUE	FALSE
cg03351003	chr16	75272306	75272307	CTRB1	1504	19421	CGI-S-Shelf	TRUE	TRUE	FALSE
cg03351418	chr6	146212966	146212967	SHPRH	257218	72591	Non-CGI	FALSE	TRUE	FALSE
cg03351487	chr2	169003820	169003821	STK39	27347	100283	Non-CGI	FALSE	TRUE	FALSE
cg03353971	chr17	31254616	31254617	TMEM98	26022	-310	CGI-N-Shore	TRUE	FALSE	FALSE
cg03354554	chr11	9781412	9781413	LOC440028	440028	-331	CGI-S-Shore	TRUE	TRUE	FALSE
cg03356494	chr13	96158480	96158481	CLDN10	9071	72626	Non-CGI	FALSE	TRUE	FALSE
cg03357952	chr4	1027974	1027975	FGFRL1	53834	23033	CGI-N-Shore	FALSE	FALSE	TRUE
cg03360728	chr11	34284610	34284611	ABTB2	25841	94943	Non-CGI	FALSE	TRUE	FALSE
cg03362871	chr22	50352912	50352913	PIM3	415116	-1229	CGI-N-Shore	TRUE	FALSE	FALSE
cg03363142	chr8	69942947	69942948	LOC100505718	100505718	73476	Non-CGI	FALSE	TRUE	FALSE
cg03363565	chr16	474528	474529	RAB11FIP3	9727	-1138	CGI	TRUE	FALSE	FALSE
cg03364247	chr3	40570062	40570063	ZNF621	285268	3685	CGI-S-Shelf	FALSE	TRUE	FALSE
cg03365937	chr11	45688659	45688660	CHST1	8534	-1452	CGI-S-Shore	TRUE	FALSE	FALSE
cg03368634	chr16	3824553	3824554	TRAP1	10131	-56954	Non-CGI	FALSE	TRUE	FALSE
cg03369382	chr7	139427635	139427636	HIPK2	28996	50056	Non-CGI	FALSE	TRUE	FALSE
cg03370261	chr3	14326681	14326682	LSM3	27258	106452	Non-CGI	FALSE	FALSE	TRUE
cg03370270	chr7	106065603	106065604	NAMPT	10135	-139964	Non-CGI	FALSE	FALSE	TRUE
cg03372603	chr3	25639601	25639602	MIR4442	100616477	66827	Non-CGI	FALSE	TRUE	FALSE
cg03372905	chr2	242752746	242752747	NEU4	129807	2585	CGI-N-Shore	TRUE	TRUE	FALSE
cg03374695	chr8	127568328	127568329	FAM84B	157638	2381	CGI-N-Shore	FALSE	TRUE	FALSE
cg03374976	chr1	205630722	205630723	ELK4	2005	18906	CGI-N-Shore	FALSE	TRUE	FALSE
[truncated: 12,145 more rows]

## Sheet: Neuron
Supplemental Table5: List of CpG sites hypomethylated in neuron during aging
Target ID	Chromosome	start	end	nearest.gene	nearest.gene.id	disttotss	hmm.cpgi	prom.reg	intra.reg	inter.reg
cg00031443	chr19	7599076	7599077	PNPLA6	10908	37	CGI	TRUE	FALSE	FALSE
cg00035937	chr7	91874085	91874086	KRIT1	889	1327	CGI-N-Shore	TRUE	TRUE	FALSE
cg00039489	chr16	24712522	24712523	TNRC6A	27327	-28525	Non-CGI	FALSE	FALSE	TRUE
cg00049883	chr16	5554273	5554274	FAM86A	196483	-406483	Non-CGI	FALSE	TRUE	FALSE
cg00050692	chr2	25524877	25524878	MIR1301	100302246	26711	CGI-N-Shore	FALSE	TRUE	FALSE
cg00053086	chr1	233119296	233119297	NTPCR	84284	32925	CGI	FALSE	FALSE	TRUE
cg00059240	chr10	3155604	3155605	PITRM1-AS1	100507034	-28187	CGI	TRUE	TRUE	FALSE
cg00066828	chr17	1837612	1837613	RTN4RL1	146760	90564	CGI-N-Shore	FALSE	FALSE	TRUE
cg00084094	chr12	109096204	109096205	CORO1C	23603	29089	Non-CGI	FALSE	TRUE	FALSE
cg00091760	chr10	124131072	124131073	PLEKHA1	59338	-3020	CGI-N-Shelf	FALSE	FALSE	TRUE
cg00093956	chr12	107372431	107372432	MTERFD3	80298	8496	Non-CGI	TRUE	TRUE	FALSE
cg00164282	chr17	30830732	30830733	CDK5R1	8851	16626	Non-CGI	FALSE	TRUE	FALSE
cg00164462	chr1	25234549	25234550	RUNX3	864	57061	CGI	FALSE	TRUE	FALSE
cg00226265	chr6	32134490	32134491	EGFL8	80864	2107	CGI-N-Shore	FALSE	TRUE	FALSE
cg00237520	chr5	177764237	177764238	AGXT2L2	85007	-104433	CGI	FALSE	TRUE	FALSE
cg00238543	chr20	56246759	56246760	PMEPA1	56937	39780	CGI-N-Shore	FALSE	TRUE	FALSE
cg00242031	chr5	174869880	174869881	DRD1	1812	1281	CGI-N-Shore	TRUE	TRUE	FALSE
cg00246969	chr13	99159656	99159657	STK24	8428	69738	CGI-S-Shore	FALSE	TRUE	FALSE
cg00252813	chr12	6642229	6642230	GAPDH	2597	-1426	CGI-N-Shore	TRUE	FALSE	FALSE
cg00259019	chr2	236611999	236612000	AGAP1	116987	209265	Non-CGI	FALSE	TRUE	FALSE
cg00277753	chr10	134918927	134918928	GPR123	84435	34493	CGI	FALSE	TRUE	FALSE
cg00283986	chr2	20875062	20875063	GDF7	151449	8637	CGI-S-Shelf	FALSE	FALSE	TRUE
cg00295853	chr1	87245071	87245072	SH3GLB1	51100	74817	Non-CGI	FALSE	FALSE	TRUE
cg00296578	chr2	36716635	36716636	FEZ2	9637	108695	Non-CGI	FALSE	TRUE	FALSE
cg00308909	chr10	130062280	130062281	MKI67	4288	-137811	CGI-N-Shore	FALSE	TRUE	FALSE
cg00337558	chr11	125214709	125214710	FEZ1	9638	151495	Non-CGI	FALSE	TRUE	FALSE
cg00343305	chr16	22104151	22104152	VWA3A	146177	287	Non-CGI	FALSE	TRUE	FALSE
cg00346244	chr16	87468226	87468227	MAP1LC3B	81631	42424	CGI-S-Shore	FALSE	TRUE	FALSE
cg00351443	chr10	105252720	105252721	NEURL	9148	-1013	CGI-N-Shore	TRUE	FALSE	FALSE
cg00359590	chr8	27469673	27469674	CLU	1191	2653	CGI-N-Shelf	TRUE	TRUE	FALSE
cg00364287	chr12	121570752	121570753	P2RX7	5027	129	Non-CGI	TRUE	FALSE	FALSE
cg00390337	chr16	1798633	1798634	MIR3177	100423012	13646	CGI	FALSE	TRUE	FALSE
cg00393546	chr10	461919	461920	PRR26	414235	-233967	CGI	TRUE	TRUE	FALSE
cg00407393	chr6	158464296	158464297	SYNJ2	8871	61407	CGI	FALSE	TRUE	FALSE
cg00411948	chr11	133800473	133800474	IGSF9B	22997	26405	CGI-S-Shore	FALSE	TRUE	FALSE
cg00416645	chr2	217561367	217561368	IGFBP5	3488	-1094	CGI-S-Shore	TRUE	FALSE	FALSE
cg00439709	chr6	74404526	74404527	CD109	135228	-980	CGI-N-Shore	TRUE	TRUE	FALSE
cg00445232	chr15	67460571	67460572	IQCH	64799	-86565	CGI-S-Shelf	FALSE	TRUE	FALSE
cg00460589	chr6	13274354	13274355	LOC100130357	100130357	21462	CGI	FALSE	TRUE	FALSE
cg00460684	chr17	55333738	55333739	MSI2	124540	525	CGI	TRUE	TRUE	FALSE
cg00461578	chr4	146819333	146819334	ZNF827	152485	40272	Non-CGI	FALSE	TRUE	FALSE
cg00469897	chr7	47611829	47611830	TNS3	64759	9911	Non-CGI	FALSE	TRUE	FALSE
cg00474840	chr19	18120819	18120820	ARRDC2	27106	8874	CGI-S-Shore	FALSE	TRUE	FALSE
cg00489795	chr22	24041104	24041105	RGL4	266747	8142	Non-CGI	FALSE	TRUE	FALSE
cg00491428	chr7	151553868	151553869	PRKAG2-AS1	100505483	-20257	CGI	FALSE	TRUE	FALSE
cg00514353	chr5	141233646	141233647	PCDH1	5097	24296	CGI-N-Shore	FALSE	TRUE	FALSE
cg00528191	chr1	33235717	33235718	KIAA1522	57648	28204	CGI	FALSE	TRUE	FALSE
cg00528490	chr2	102394306	102394307	MAP4K4	9448	80140	Non-CGI	FALSE	TRUE	FALSE
cg00554173	chr20	3149777	3149778	PROSAPIP1	9762	4413	CGI-S-Shore	TRUE	TRUE	FALSE
cg00559249	chr5	131831244	131831245	IRF1	3659	13	CGI-N-Shore	FALSE	TRUE	FALSE
cg00563348	chr15	41184109	41184110	VPS18	57617	-2517	CGI-N-Shore	FALSE	FALSE	TRUE
cg00564723	chr10	75632066	75632067	CAMK2G	818	2281	CGI-N-Shore	FALSE	TRUE	FALSE
cg00566297	chr1	241588176	241588177	RGS7	6000	-67697	CGI-S-Shore	FALSE	FALSE	TRUE
cg00579868	chr7	5271516	5271517	WIPI2	26100	41680	CGI	FALSE	TRUE	FALSE
cg00595472	chr11	61525251	61525252	DKFZP434K028	26070	-114	Non-CGI	TRUE	TRUE	FALSE
cg00607797	chr15	25418880	25418881	SNORD115-2	100033437	1097	Non-CGI	TRUE	TRUE	FALSE
cg00615941	chr3	45293922	45293923	TMEM158	25907	-26107	Non-CGI	FALSE	FALSE	TRUE
cg00619168	chr17	80763930	80763931	ZNF750	79755	33999	CGI	FALSE	TRUE	FALSE
cg00624908	chr1	3327395	3327396	ARHGEF16	27237	-43750	CGI-S-Shore	FALSE	TRUE	FALSE
cg00630420	chr16	89139905	89139906	ACSF3	197322	-20310	CGI-S-Shore	FALSE	FALSE	TRUE
cg00648883	chr13	32524761	32524762	FRY	10129	-80674	CGI-N-Shore	TRUE	TRUE	FALSE
cg00675650	chr3	172429335	172429336	NCEH1	57552	-326	CGI-S-Shore	TRUE	FALSE	FALSE
cg00687714	chr16	21272887	21272888	ANKS4B	257629	27870	Non-CGI	FALSE	TRUE	FALSE
cg00690901	chr10	61043150	61043151	FAM13C	220965	79509	Non-CGI	FALSE	TRUE	FALSE
cg00702417	chr1	6054867	6054868	NPHP4	261734	-2333	CGI-S-Shore	FALSE	TRUE	FALSE
cg00706570	chr18	74692116	74692117	MBP	4155	152656	CGI	TRUE	TRUE	FALSE
cg00712106	chr21	16340625	16340626	NRIP1	8204	96499	Non-CGI	TRUE	TRUE	FALSE
cg00728999	chr17	40897147	40897148	EZH1	2145	-75	CGI	TRUE	FALSE	FALSE
cg00736406	chr16	23504930	23504931	GGA2	23062	16883	Non-CGI	FALSE	TRUE	FALSE
cg00759807	chr16	89390789	89390790	LOC100287036	100287036	3247	CGI	FALSE	TRUE	FALSE
cg00765705	chr12	124865130	124865131	FAM101A	144347	91419	CGI-S-Shelf	FALSE	TRUE	FALSE
cg00779056	chr16	1052756	1052757	SOX8	30812	20947	CGI	FALSE	FALSE	TRUE
cg00791854	chr1	154392070	154392071	IL6R	3570	14400	Non-CGI	FALSE	TRUE	FALSE
cg00817464	chr10	111662876	111662877	XPNPEP1	7511	20433	Non-CGI	FALSE	TRUE	FALSE
cg00819362	chr19	36524208	36524209	CLIP3	25999	-410	CGI-S-Shore	TRUE	TRUE	FALSE
cg00839132	chr18	74692235	74692236	MBP	4155	152537	CGI	TRUE	TRUE	FALSE
cg00840412	chr12	127359199	127359200	LOC440117	440117	35	Non-CGI	TRUE	FALSE	FALSE
cg00849853	chr21	47808878	47808879	PCNT	5116	64841	CGI	FALSE	TRUE	FALSE
cg00864460	chr19	39336980	39336981	HNRNPL	3191	5997	CGI-N-Shelf	FALSE	TRUE	FALSE
cg00871133	chr17	37793028	37793029	STARD3	10948	-303	CGI-N-Shore	TRUE	FALSE	FALSE
cg00876267	chr9	139588516	139588517	AGPAT2	10555	-6604	CGI-S-Shore	FALSE	FALSE	TRUE
cg00882130	chr2	206950418	206950419	INO80D	54891	486	CGI	TRUE	TRUE	FALSE
cg00883689	chr2	54802904	54802905	RPL23AP32	56969	46544	Non-CGI	FALSE	TRUE	FALSE
cg00886387	chr13	44729868	44729869	LINC00284	121838	133396	Non-CGI	FALSE	TRUE	FALSE
cg00902427	chr22	41074991	41074992	MCHR1	2847	-189	CGI-N-Shelf	TRUE	FALSE	FALSE
cg00907842	chr5	39219245	39219246	FYB	2533	51512	Non-CGI	FALSE	TRUE	FALSE
cg00912580	chr2	135169533	135169534	MGAT5	4249	157702	Non-CGI	FALSE	TRUE	FALSE
cg00920139	chr8	22455473	22455474	C8orf58	541565	-1639	CGI-N-Shore	TRUE	TRUE	FALSE
cg00929860	chr10	73846448	73846449	SPOCK2	9806	2340	CGI	FALSE	TRUE	FALSE
cg00944142	chr1	23946007	23946008	MDS2	259283	38021	CGI	FALSE	TRUE	FALSE
cg00960772	chr12	133127270	133127271	LRCOL1	100507055	59765	CGI	TRUE	TRUE	FALSE
cg00961855	chr17	77980966	77980967	TBC1D16	125058	28679	CGI	FALSE	TRUE	FALSE
cg00967885	chr5	176054480	176054481	MIR4281	100422962	2019	CGI-N-Shelf	FALSE	TRUE	FALSE
cg00979195	chr5	132155965	132155966	SOWAHA	134548	6931	CGI-S-Shore	FALSE	FALSE	TRUE
cg01012713	chr8	1960217	1960218	MYOM2	9172	-32939	CGI	FALSE	FALSE	TRUE
cg01014224	chr13	44379186	44379187	ENOX1	55068	-18069	Non-CGI	FALSE	FALSE	TRUE
cg01050810	chr6	168053859	168053860	C6orf123	26238	143678	CGI	FALSE	FALSE	TRUE
cg01077100	chr10	124067280	124067281	BTBD16	118663	36458	Non-CGI	FALSE	TRUE	FALSE
cg01079840	chr6	30520405	30520406	PRR3	80742	-4079	CGI-N-Shelf	FALSE	TRUE	FALSE
cg01089364	chr1	246781432	246781433	CNST	163882	51792	CGI-N-Shore	FALSE	TRUE	FALSE
cg01094891	chr19	31048117	31048118	ZNF536	9745	184788	Non-CGI	TRUE	TRUE	FALSE
cg01099855	chr12	64271616	64271617	SRGAP1	57522	33074	Non-CGI	FALSE	TRUE	FALSE
cg01102833	chr4	176986621	176986622	WDR17	116966	-362	CGI-N-Shore	TRUE	FALSE	FALSE
cg01120851	chr1	6657644	6657645	KLHL21	9903	5283	CGI-N-Shore	FALSE	TRUE	FALSE
cg01129886	chr20	31072675	31072676	C20orf112	140688	51523	CGI	TRUE	TRUE	FALSE
cg01139880	chr16	1545088	1545089	TELO2	9894	1735	CGI-S-Shore	FALSE	TRUE	FALSE
cg01143247	chr2	3469390	3469391	ADI1	55256	53958	CGI	FALSE	TRUE	FALSE
cg01153817	chr11	17409509	17409510	KCNJ11	3767	1367	CGI	TRUE	TRUE	FALSE
cg01154505	chr2	112940409	112940410	FBLN7	129804	44446	CGI-S-Shore	FALSE	TRUE	FALSE
cg01154721	chr12	121881891	121881892	RNF34	80196	43988	CGI	TRUE	TRUE	FALSE
cg01160818	chr5	131747058	131747059	C5orf56	441108	592	CGI-S-Shore	FALSE	TRUE	FALSE
cg01163369	chr3	128370232	128370233	RPN1	6184	29684	CGI-S-Shore	TRUE	TRUE	FALSE
cg01179095	chr1	11900652	11900653	NPPA-AS1	100379251	275	CGI-S-Shore	FALSE	TRUE	FALSE
cg01180831	chr14	89361469	89361470	TTC8	123016	70971	Non-CGI	FALSE	FALSE	TRUE
cg01211137	chr11	13993807	13993808	SPON1	10418	9622	Non-CGI	FALSE	TRUE	FALSE
cg01232969	chr18	64933074	64933075	LOC643542	643542	-250707	Non-CGI	FALSE	FALSE	TRUE
cg01251150	chr5	67535553	67535554	PIK3R1	5295	23968	Non-CGI	FALSE	TRUE	FALSE
cg01261206	chr11	1011281	1011282	MUC6	4588	25423	CGI	FALSE	TRUE	FALSE
cg01264729	chr16	14622974	14622975	PARN	5073	101152	CGI-N-Shelf	FALSE	TRUE	FALSE
cg01268345	chr7	138603645	138603646	KIAA1549	57670	62417	CGI	FALSE	TRUE	FALSE
cg01268866	chr2	3683757	3683758	ALLC	55821	-22027	CGI-N-Shore	FALSE	TRUE	FALSE
cg01280180	chr3	138047362	138047363	NME9	347736	1364	CGI-N-Shore	FALSE	TRUE	FALSE
cg01311170	chr17	39169407	39169408	KRTAP3-1	83896	-4040	Non-CGI	FALSE	FALSE	TRUE
cg01317029	chr3	184063497	184063498	FAM131A	131408	9779	Non-CGI	FALSE	TRUE	FALSE
cg01333788	chr1	35220814	35220815	GJB5	2709	92	CGI-N-Shelf	FALSE	TRUE	FALSE
cg01339704	chr17	4488235	4488236	SMTNL2	342527	958	CGI	TRUE	TRUE	FALSE
cg01381367	chr11	72433551	72433552	PDE2A	5138	-48053	Non-CGI	TRUE	TRUE	FALSE
cg01385959	chr2	190119363	190119364	COL5A2	1290	-74757	Non-CGI	FALSE	FALSE	TRUE
cg01407332	chr12	131617092	131617093	LOC116437	116437	-32462	CGI-S-Shore	FALSE	TRUE	FALSE
cg01409163	chr8	670353	670354	ERICH1	157697	10871	CGI	FALSE	TRUE	FALSE
cg01416043	chr2	11053694	11053695	KCNF1	3754	1630	CGI	TRUE	FALSE	FALSE
cg01417714	chr1	155223726	155223727	FAM189B	10712	1546	CGI-N-Shore	FALSE	TRUE	FALSE
cg01425188	chr8	28479277	28479278	EXTL3	2137	-79874	CGI-N-Shore	FALSE	FALSE	TRUE
cg01427436	chr4	174240175	174240176	HMGB2	3148	15418	Non-CGI	FALSE	TRUE	FALSE
cg01435643	chr13	113689776	113689777	MCF2L-AS1	100289410	-66823	CGI-S-Shore	FALSE	TRUE	FALSE
cg01487386	chr20	43725966	43725967	KCNS1	3787	3785	CGI-N-Shore	FALSE	TRUE	FALSE
cg01492656	chr4	40057241	40057242	N4BP2	55728	-1281	CGI-N-Shore	TRUE	TRUE	FALSE
cg01510990	chr6	4914643	4914644	RPP40	10799	89626	Non-CGI	FALSE	TRUE	FALSE
cg01515543	chr9	92254510	92254511	UNQ6494	100129066	-186	Non-CGI	TRUE	FALSE	FALSE
cg01515741	chr17	40695686	40695687	NAGLU	4669	7734	CGI	FALSE	TRUE	FALSE
cg01521080	chr17	79232608	79232609	C17orf89	284184	19502	CGI-S-Shore	FALSE	TRUE	FALSE
cg01537369	chr4	2733970	2733971	TNIP2	79155	24131	CGI	FALSE	TRUE	FALSE
cg01537765	chr19	42914828	42914829	LIPE	3991	16748	CGI	FALSE	TRUE	FALSE
cg01542019	chr19	14673053	14673054	NDUFB7	4713	9834	CGI-N-Shore	FALSE	TRUE	FALSE
cg01548777	chr20	62433998	62433999	ZBTB46	140685	28597	CGI	FALSE	TRUE	FALSE
cg01553935	chr1	46641061	46641062	TSPAN1	10103	311	Non-CGI	TRUE	TRUE	FALSE
cg01570068	chr8	1937676	1937677	KBTBD11	9920	15631	CGI-N-Shore	FALSE	TRUE	FALSE
cg01582937	chr8	22411211	22411212	SORBS3	10174	1959	CGI-S-Shore	FALSE	TRUE	FALSE
cg01607932	chr3	5027597	5027598	BHLHE40-AS1	100507582	-5950	CGI-N-Shore	FALSE	FALSE	TRUE
cg01608304	chr16	13547884	13547885	ERCC4	2072	-466128	Non-CGI	FALSE	FALSE	TRUE
cg01611777	chr2	102359027	102359028	MAP4K4	9448	44861	Non-CGI	FALSE	TRUE	FALSE
cg01612824	chr14	56313920	56313921	LINC00520	645687	-50527	Non-CGI	FALSE	FALSE	TRUE
cg01612936	chr20	34051662	34051663	CEP250	11190	8665	Non-CGI	FALSE	TRUE	FALSE
cg01620540	chr13	47472064	47472065	HTR2A	3356	-894	CGI-S-Shelf	TRUE	FALSE	FALSE
cg01635736	chr12	132902607	132902608	GALNT9	50614	3296	CGI-S-Shore	FALSE	TRUE	FALSE
cg01660407	chr2	101008576	101008577	CHST10	9486	25552	CGI-N-Shore	FALSE	TRUE	FALSE
cg01670896	chr8	1933522	1933523	KBTBD11	9920	11477	CGI-N-Shore	FALSE	TRUE	FALSE
cg01674777	chr8	1861037	1861038	KBTBD11	9920	-61005	CGI-S-Shore	FALSE	TRUE	FALSE
cg01678878	chr16	81272429	81272430	BCMO1	53630	132	Non-CGI	TRUE	FALSE	FALSE
cg01696784	chr2	235904501	235904502	SH3BP4	23677	43872	CGI	TRUE	TRUE	FALSE
cg01698177	chr16	19870092	19870093	GPRC5B	51704	26738	CGI	FALSE	TRUE	FALSE
cg01702055	chr6	13303065	13303066	LOC100130357	100130357	-7246	Non-CGI	FALSE	TRUE	FALSE
cg01719100	chr1	9255815	9255816	H6PD	9563	-39046	CGI-N-Shore	FALSE	FALSE	TRUE
cg01751802	chr19	11309639	11309640	KANK2	25959	-1171	CGI-S-Shore	TRUE	FALSE	FALSE
cg01754780	chr17	36728693	36728694	SRCIN1	80725	33488	CGI	FALSE	TRUE	FALSE
cg01763702	chr7	1199903	1199904	ZFAND2A	90637	-47	CGI	TRUE	FALSE	FALSE
cg01769521	chr8	142179603	142179604	DENND3	22898	40882	CGI-S-Shore	FALSE	TRUE	FALSE
cg01799588	chr11	5706381	5706382	TRIM22	10346	-4434	CGI-S-Shore	TRUE	TRUE	FALSE
cg01816748	chr5	149512117	149512118	CSF1R	1436	-19181	CGI-S-Shelf	FALSE	TRUE	FALSE
cg01842719	chr2	241658550	241658551	AQP12A	375318	27287	Non-CGI	FALSE	TRUE	FALSE
cg01850135	chr16	4516078	4516079	HMOX2	3163	-8639	CGI-N-Shore	FALSE	TRUE	FALSE
cg01860805	chr5	180659749	180659750	SNORD96A	619571	9138	CGI-N-Shore	TRUE	TRUE	FALSE
cg01864178	chr20	44662890	44662891	SLC12A5	57468	12560	CGI-S-Shore	FALSE	TRUE	FALSE
cg01864791	chr3	5024963	5024964	BHLHE40-AS1	100507582	-3316	CGI	FALSE	TRUE	FALSE
cg01870865	chr3	48507087	48507088	TREX1	11277	5900	Non-CGI	TRUE	TRUE	FALSE
cg01889169	chr7	927986	927987	GET4	51608	36398	CGI	FALSE	TRUE	FALSE
cg01904393	chr12	51815083	51815084	GALNT6	11226	-29681	CGI-N-Shelf	FALSE	TRUE	FALSE
cg01919011	chr14	75936668	75936669	JDP2	122953	42158	CGI	FALSE	TRUE	FALSE
cg01934408	chr1	6085799	6085800	NPHP4	261734	-33265	CGI-N-Shore	TRUE	TRUE	FALSE
cg01942558	chr2	152214027	152214028	TNFAIP6	7130	-77	Non-CGI	TRUE	TRUE	FALSE
cg01963702	chr11	12188996	12188997	MICAL2	9645	73452	Non-CGI	FALSE	TRUE	FALSE
cg01965552	chr5	40478425	40478426	PTGER4	5734	-201605	Non-CGI	FALSE	FALSE	TRUE
cg01972879	chr7	30720901	30720902	INMT	11185	-16698	CGI-N-Shore	FALSE	TRUE	FALSE
cg02000113	chr14	104206884	104206885	ZFYVE21	79038	24802	CGI-S-Shore	FALSE	TRUE	FALSE
cg02021485	chr11	65959730	65959731	KLC2	64837	-65033	Non-CGI	FALSE	TRUE	FALSE
cg02046143	chr11	133797911	133797912	LOC283174	283174	-26275	CGI-N-Shelf	FALSE	TRUE	FALSE
cg02047051	chr3	12792283	12792284	TMEM40	55287	18671	Non-CGI	FALSE	TRUE	FALSE
cg02049955	chr11	118045910	118045911	SCN2B	6327	1425	CGI-S-Shelf	FALSE	TRUE	FALSE
cg02053964	chr12	124950784	124950785	NCOR2	9612	101224	CGI	FALSE	TRUE	FALSE
cg02076848	chr1	111147106	111147107	KCNA2	3737	26988	CGI-N-Shore	TRUE	TRUE	FALSE
cg02082273	chr11	10473038	10473039	AMPD3	272	1169	CGI-S-Shore	FALSE	TRUE	FALSE
cg02084118	chr7	971027	971028	ADAP1	11033	44206	CGI-S-Shelf	FALSE	TRUE	FALSE
cg02094337	chr17	80542118	80542119	WDR45B	56270	64291	CGI	FALSE	TRUE	FALSE
cg02100497	chr9	90273707	90273708	CTSL1	1514	-67265	CGI-N-Shore	FALSE	TRUE	FALSE
cg02116280	chr2	74693479	74693480	MOGS	7841	-941	CGI-S-Shore	TRUE	FALSE	FALSE
cg02116864	chr10	134222453	134222454	PWWP2B	170394	11750	CGI-S-Shore	FALSE	TRUE	FALSE
cg02118886	chr6	158464852	158464853	SYNJ2	8871	61963	CGI-S-Shore	FALSE	TRUE	FALSE
cg02132051	chr14	73020007	73020008	DPF3	8110	340800	Non-CGI	FALSE	TRUE	FALSE
cg02133624	chr3	195590041	195590042	TNK2	10188	48773	CGI-N-Shore	FALSE	FALSE	TRUE
cg02134022	chr5	79040203	79040204	CMYA5	202333	54543	Non-CGI	FALSE	TRUE	FALSE
cg02135821	chr14	94545678	94545679	DDX24	57062	1878	CGI-N-Shore	TRUE	TRUE	FALSE
cg02140559	chr8	145019839	145019840	MIR661	724031	-391	CGI-S-Shore	TRUE	TRUE	FALSE
cg02184281	chr18	46447797	46447798	SMAD7	4092	29282	CGI	FALSE	TRUE	FALSE
cg02205013	chr16	1758798	1758799	MAPK8IP3	23162	2576	CGI	FALSE	TRUE	FALSE
cg02220837	chr3	5024773	5024774	BHLHE40-AS1	100507582	-3126	CGI	FALSE	TRUE	FALSE
cg02228226	chr8	143857045	143857046	LYNX1	66004	2593	CGI-N-Shore	FALSE	TRUE	FALSE
cg02229757	chr16	15685126	15685127	KIAA0430	9665	51895	Non-CGI	FALSE	FALSE	TRUE
cg02231843	chr10	75596730	75596731	NDST2	8509	-25140	CGI-N-Shelf	FALSE	TRUE	FALSE
cg02239902	chr17	80749347	80749348	TBCD	6904	39406	CGI-N-Shelf	FALSE	TRUE	FALSE
cg02248763	chr11	1580098	1580099	DUSP8	1850	13050	CGI-S-Shore	FALSE	TRUE	FALSE
cg02261047	chr16	85962182	85962183	IRF8	3394	29407	CGI-N-Shore	FALSE	FALSE	TRUE
cg02278683	chr2	118770542	118770543	CCDC93	54520	1195	CGI-N-Shore	FALSE	TRUE	FALSE
cg02281970	chr19	1271307	1271308	CIRBP-AS1	148046	-1047	CGI-S-Shore	TRUE	TRUE	FALSE
cg02285155	chr10	21653473	21653474	MIR1915	100302129	132095	Non-CGI	FALSE	FALSE	TRUE
cg02289321	chr1	154746968	154746969	KCNN3	3782	95784	CGI-S-Shelf	FALSE	TRUE	FALSE
cg02305024	chr14	53794995	53794996	DDHD1	80821	-174948	Non-CGI	FALSE	FALSE	TRUE
cg02316506	chr3	42694803	42694804	ZBTB47	92999	-371	CGI-N-Shore	TRUE	FALSE	FALSE
cg02322400	chr11	95980186	95980187	MIR1260B	100422991	-94414	Non-CGI	FALSE	TRUE	FALSE
cg02340851	chr1	150206137	150206138	ANP32E	81611	2365	CGI-N-Shore	FALSE	TRUE	FALSE
cg02344868	chr19	39691009	39691010	NCCRP1	342897	3404	CGI-N-Shore	FALSE	TRUE	FALSE
cg02345060	chr10	3165341	3165342	PITRM1-AS1	100507034	-18450	CGI	FALSE	TRUE	FALSE
cg02347984	chr6	26170601	26170602	HIST1H2BD	3017	12251	CGI-N-Shore	FALSE	TRUE	FALSE
cg02355304	chr7	5536984	5536985	MIR589	693174	-1435	CGI-S-Shore	TRUE	TRUE	FALSE
cg02355411	chr19	49700427	49700428	TRPM4	54795	39410	CGI-S-Shore	FALSE	TRUE	FALSE
cg02362020	chr6	31502415	31502416	SNORD117	692233	1809	CGI	TRUE	TRUE	FALSE
cg02364970	chr17	77921375	77921376	TBC1D16	125058	88270	CGI	FALSE	TRUE	FALSE
cg02372702	chr12	25304568	25304569	CASC1	55259	43524	Non-CGI	FALSE	TRUE	FALSE
cg02375166	chr11	58291656	58291657	OR5B21	219968	-16077	Non-CGI	FALSE	FALSE	TRUE
cg02376843	chr5	172083710	172083711	NEURL1B	54492	15433	CGI	FALSE	TRUE	FALSE
cg02382109	chr8	22785456	22785457	PEBP4	157310	-34	Non-CGI	TRUE	FALSE	FALSE
cg02388511	chr12	50102224	50102225	FMNL3	91010	-1026	CGI-S-Shore	TRUE	FALSE	FALSE
cg02393699	chr1	2106620	2106621	C1orf86	199990	32550	CGI-S-Shore	FALSE	TRUE	FALSE
cg02410304	chr10	685448	685449	PRR26	414235	-10438	CGI	FALSE	TRUE	FALSE
cg02413246	chr10	3180822	3180823	PITRM1-AS1	100507034	-2969	CGI	FALSE	TRUE	FALSE
cg02426178	chr19	10747142	10747143	ILF3-AS1	147727	17404	CGI-N-Shore	TRUE	TRUE	FALSE
cg02448796	chr1	6101339	6101340	NPHP4	261734	-48805	CGI	FALSE	TRUE	FALSE
cg02459469	chr12	115792152	115792153	TBX3	6926	-670182	Non-CGI	FALSE	FALSE	TRUE
cg02462661	chr15	74275622	74275623	STOML1	9399	9011	Non-CGI	FALSE	TRUE	FALSE
cg02492205	chr16	30016775	30016776	DOC2A	8448	8066	CGI	FALSE	TRUE	FALSE
cg02506324	chr11	66460785	66460786	RBM4B	83759	-15509	CGI-S-Shore	FALSE	TRUE	FALSE
cg02516419	chr12	47771422	47771423	PCED1B-AS1	100233209	-161195	Non-CGI	FALSE	FALSE	TRUE
cg02533058	chr6	154363173	154363174	OPRM1	4988	31541	CGI-S-Shelf	FALSE	TRUE	FALSE
cg02549492	chr5	95066568	95066569	RHOBTB3	22836	13230	CGI-N-Shore	TRUE	TRUE	FALSE
cg02553655	chr5	150029718	150029719	MYOZ3	91977	-10684	CGI	TRUE	TRUE	FALSE
cg02579140	chr10	3160982	3160983	PITRM1-AS1	100507034	-22809	CGI	TRUE	TRUE	FALSE
cg02584377	chr12	122489545	122489546	MLXIP	22877	-27105	CGI-S-Shore	FALSE	TRUE	FALSE
cg02585329	chr6	89294475	89294476	RNGTT	8732	378871	CGI-N-Shelf	FALSE	FALSE	TRUE
cg02589576	chr1	201344793	201344794	TNNT2	7139	2010	Non-CGI	FALSE	TRUE	FALSE
cg02600679	chr16	88832700	88832701	PIEZO1	9780	18670	CGI	FALSE	TRUE	FALSE
cg02608124	chr11	18193422	18193423	MRGPRX4	117196	-960	CGI-N-Shore	TRUE	FALSE	FALSE
cg02614661	chr16	87878292	87878293	SLC7A5	8140	24806	CGI-S-Shore	FALSE	TRUE	FALSE
cg02635482	chr7	672108	672109	HEATR2	54919	-94228	CGI	FALSE	TRUE	FALSE
cg02636348	chr10	78923827	78923828	KCNMA1	3778	473748	Non-CGI	FALSE	TRUE	FALSE
cg02656741	chr1	161283918	161283919	SDHC	6391	-246	CGI	TRUE	FALSE	FALSE
cg02674562	chr19	17837854	17837855	MAP1S	55201	7550	CGI	FALSE	TRUE	FALSE
cg02681842	chr8	145033310	145033311	MIR661	724031	-13862	CGI	FALSE	TRUE	FALSE
cg02708758	chr15	74545009	74545010	CCDC33	80125	16341	Non-CGI	FALSE	TRUE	FALSE
cg02710481	chr18	77707172	77707173	PQLC1	80148	4479	CGI-S-Shelf	FALSE	TRUE	FALSE
cg02712546	chr16	69969166	69969167	MIR140	406932	2181	CGI	FALSE	TRUE	FALSE
cg02713669	chr2	109746691	109746692	SH3RF3-AS1	100287216	-115	CGI	TRUE	TRUE	FALSE
cg02723975	chr8	30209371	30209372	RBPMS	11030	-32571	CGI-N-Shore	FALSE	FALSE	TRUE
cg02753187	chr17	46919180	46919181	CALCOCO2	10241	10807	Non-CGI	FALSE	TRUE	FALSE
cg02762546	chr3	13520685	13520686	HDAC11	79885	-537	CGI-N-Shore	TRUE	FALSE	FALSE
cg02765343	chr10	126331238	126331239	FAM53B	9679	147667	CGI-N-Shore	FALSE	TRUE	FALSE
cg02765363	chr17	80200741	80200742	SLC16A3	9123	14458	CGI	FALSE	TRUE	FALSE
cg02767634	chr5	179036637	179036638	HNRNPH1	3187	15031	CGI	FALSE	TRUE	FALSE
cg02773188	chr4	152332936	152332937	FAM160A1	729830	2537	CGI-S-Shelf	FALSE	TRUE	FALSE
cg02812487	chr12	125577625	125577626	AACS	65985	27699	CGI-N-Shore	FALSE	TRUE	FALSE
cg02814163	chr13	114768317	114768318	RASA3	22821	129776	CGI-S-Shore	FALSE	TRUE	FALSE
cg02818170	chr19	3336941	3336942	NFIC	4782	-22618	Non-CGI	FALSE	FALSE	TRUE
cg02824818	chr17	727734	727735	GLOD4	51031	-42162	CGI-N-Shore	FALSE	TRUE	FALSE
cg02832915	chr2	70188531	70188532	ASPRV1	151516	864	Non-CGI	TRUE	FALSE	FALSE
cg02841931	chr3	120401765	120401766	HGD	3081	-346	Non-CGI	TRUE	FALSE	FALSE
cg02842704	chr5	151305746	151305747	GLRA1	2741	-1348	CGI-S-Shore	TRUE	FALSE	FALSE
cg02852529	chr11	20057511	20057512	DBX1	120237	124357	Non-CGI	TRUE	TRUE	FALSE
cg02861178	chr20	10492319	10492320	SLX4IP	128710	76367	Non-CGI	FALSE	TRUE	FALSE
cg02872930	chr19	45649752	45649753	NKPD1	284353	13654	CGI-S-Shore	FALSE	TRUE	FALSE
cg02894896	chr8	37706721	37706722	BRF2	55290	708	CGI-N-Shore	FALSE	TRUE	FALSE
cg02911509	chr22	44568770	44568771	PARVG	64098	-64	Non-CGI	TRUE	FALSE	FALSE
cg02912371	chr1	205913859	205913860	SLC26A9	115019	-1270	Non-CGI	TRUE	FALSE	FALSE
cg02919564	chr6	47210376	47210377	TNFRSF21	27242	67302	Non-CGI	FALSE	TRUE	FALSE
cg02923831	chr8	38386436	38386437	C8orf86	389649	-255	Non-CGI	TRUE	FALSE	FALSE
cg02928840	chr1	208218075	208218076	CD34	947	-133391	Non-CGI	FALSE	TRUE	FALSE
cg02928928	chr11	1975304	1975305	MRPL23	6150	6801	CGI-S-Shore	FALSE	TRUE	FALSE
cg02952972	chr11	972247	972248	AP2A2	161	46437	CGI	TRUE	TRUE	FALSE
cg02985541	chr2	219472218	219472219	PLCD4	84812	-268	Non-CGI	TRUE	FALSE	FALSE
cg02991118	chr7	4823955	4823956	MIR4656	100616465	4313	CGI	FALSE	TRUE	FALSE
cg03014882	chr19	18120728	18120729	ARRDC2	27106	8783	CGI	FALSE	TRUE	FALSE
cg03016867	chr5	148442890	148442891	SH3TC2	79628	-152	Non-CGI	TRUE	FALSE	FALSE
cg03016975	chr19	4124072	4124073	MAP2K2	5605	52	CGI	TRUE	FALSE	FALSE
cg03021296	chr7	158060614	158060615	MIR595	693180	264889	CGI-S-Shore	FALSE	TRUE	FALSE
cg03026373	chr17	36715787	36715788	SRCIN1	80725	46394	CGI	TRUE	TRUE	FALSE
cg03026397	chr1	6050328	6050329	KCNAB2	8514	-2028	CGI-N-Shore	FALSE	TRUE	FALSE
cg03043078	chr12	132338736	132338737	MMP17	4326	25794	CGI	FALSE	FALSE	TRUE
cg03072616	chr19	18968219	18968220	UPF1	5976	25474	CGI-S-Shore	TRUE	TRUE	FALSE
cg03089475	chr11	130030459	130030460	ST14	6768	776	CGI-S-Shore	FALSE	TRUE	FALSE
cg03096954	chr16	85347426	85347427	LOC727710	727710	-10423	CGI-S-Shelf	FALSE	FALSE	TRUE
cg03118626	chr19	51523252	51523253	KLK10	5655	177	CGI-S-Shore	TRUE	TRUE	FALSE
cg03148084	chr18	72201665	72201666	CNDP1	84735	-25	Non-CGI	TRUE	FALSE	FALSE
cg03176203	chr16	14580863	14580864	PARN	5073	143263	Non-CGI	FALSE	TRUE	FALSE
cg03195377	chr8	142289782	142289783	SLC45A4	57210	-25556	CGI	FALSE	FALSE	TRUE
cg03216884	chr6	56514787	56514788	DST	667	201925	Non-CGI	FALSE	TRUE	FALSE
cg03219838	chr5	134672054	134672055	H2AFY	9555	63521	Non-CGI	TRUE	TRUE	FALSE
cg03222310	chr19	37064303	37064304	ZNF382	84911	-31414	CGI	TRUE	TRUE	FALSE
cg03224175	chr20	3996790	3996791	RNF24	11237	-573	CGI-S-Shore	TRUE	FALSE	FALSE
cg03226872	chr20	36153865	36153866	BLCAP	10904	2466	CGI-N-Shore	TRUE	TRUE	FALSE
cg03236137	chr17	75401367	75401368	MIR4316	100422851	-8230	CGI-S-Shelf	FALSE	TRUE	FALSE
cg03250220	chr2	110970097	110970098	NPHP1	4867	-7457	CGI	FALSE	TRUE	FALSE
cg03272310	chr17	39704454	39704455	LOC147093	147093	6291	CGI-N-Shore	FALSE	TRUE	FALSE
cg03276000	chr7	154087975	154087976	DPP6	1804	503555	CGI	FALSE	TRUE	FALSE
cg03298700	chr2	220295753	220295754	SPEG	10290	-3945	CGI-N-Shelf	FALSE	FALSE	TRUE
cg03309455	chr8	88845118	88845119	DCAF4L2	138009	41176	Non-CGI	FALSE	FALSE	TRUE
cg03329755	chr6	167189272	167189273	RPS6KA2	6196	86497	CGI	FALSE	TRUE	FALSE
cg03341508	chr8	38238324	38238325	WHSC1L1	54904	1464	CGI-N-Shore	FALSE	TRUE	FALSE
cg03350493	chr15	41837400	41837401	RPAP1	26015	-935	CGI-S-Shore	TRUE	FALSE	FALSE
cg03361776	chr13	24001967	24001968	SACS	26278	5872	Non-CGI	FALSE	TRUE	FALSE
cg03363142	chr8	69942947	69942948	LOC100505718	100505718	73476	Non-CGI	FALSE	TRUE	FALSE
cg03382549	chr7	34799274	34799275	NPSR1	387129	101376	Non-CGI	TRUE	TRUE	FALSE
cg03387092	chr3	123493248	123493249	MYLK	4638	109899	Non-CGI	FALSE	TRUE	FALSE
cg03391019	chr1	161927947	161927948	OLFML2B	25903	65695	Non-CGI	FALSE	TRUE	FALSE
cg03391318	chr16	4511917	4511918	HMOX2	3163	-12800	CGI	FALSE	TRUE	FALSE
cg03392386	chr11	133800800	133800801	IGSF9B	22997	26078	CGI	FALSE	TRUE	FALSE
cg03398156	chr2	220154779	220154780	MIR153-1	406944	4141	Non-CGI	FALSE	TRUE	FALSE
cg03408122	chr22	50903314	50903315	SBF1	6305	10148	CGI	FALSE	TRUE	FALSE
cg03412497	chr2	181512606	181512607	UBE2E3	10477	-332504	Non-CGI	FALSE	FALSE	TRUE
cg03421358	chr17	17479100	17479101	PEMT	10400	15892	Non-CGI	FALSE	TRUE	FALSE
cg03426762	chr6	33255172	33255173	WDR46	9277	2130	CGI-N-Shore	FALSE	TRUE	FALSE
cg03444838	chr10	1156482	1156483	LINC00200	399706	-49224	CGI	FALSE	TRUE	FALSE
cg03475821	chr14	105288120	105288121	LINC00638	196872	581	CGI-S-Shore	TRUE	FALSE	FALSE
cg03500993	chr16	1551038	1551039	TELO2	9894	7685	CGI-S-Shore	FALSE	TRUE	FALSE
cg03501666	chr12	99264415	99264416	APAF1	317	225336	Non-CGI	FALSE	TRUE	FALSE
cg03505866	chr14	70077191	70077192	KIAA0247	9766	-1117	CGI-N-Shore	TRUE	FALSE	FALSE
cg03512414	chr20	19915874	19915875	RIN2	54453	48708	Non-CGI	FALSE	TRUE	FALSE
cg03520401	chr14	104182074	104182075	ZFYVE21	79038	-5	CGI	TRUE	FALSE	FALSE
cg03520802	chr7	139273697	139273698	CLEC2L	154790	65022	Non-CGI	FALSE	TRUE	FALSE
cg03529595	chr16	7056916	7056917	RBFOX1	54715	987783	Non-CGI	FALSE	TRUE	FALSE
cg03535079	chr8	48523498	48523499	CEBPD	1052	127226	Non-CGI	FALSE	TRUE	FALSE
cg03536289	chr14	94443120	94443121	ASB2	51676	-43	Non-CGI	TRUE	FALSE	FALSE
cg03543954	chr16	85116335	85116336	FAM92B	339145	29777	CGI	FALSE	TRUE	FALSE
cg03547797	chr11	22689644	22689645	GAS2	2620	1483	CGI-S-Shore	TRUE	TRUE	FALSE
cg03548512	chr10	73978697	73978698	ASCC1	51008	-1804	CGI-S-Shore	TRUE	TRUE	FALSE
cg03566107	chr18	70211962	70211963	CBLN2	147381	-238	CGI	TRUE	FALSE	FALSE
cg03591467	chr2	163101493	163101494	FAP	2191	-1447	Non-CGI	TRUE	FALSE	FALSE
cg03591753	chr6	35659141	35659142	FKBP5	2289	37254	CGI-S-Shelf	FALSE	TRUE	FALSE
cg03598297	chr3	5024761	5024762	BHLHE40-AS1	100507582	-3114	CGI	FALSE	TRUE	FALSE
cg03609435	chr17	34965792	34965793	MRM1	79922	7766	Non-CGI	FALSE	FALSE	TRUE
cg03623982	chr6	37470086	37470087	CCDC167	154467	-2385	CGI-S-Shelf	FALSE	FALSE	TRUE
cg03626024	chr12	108524345	108524346	WSCD2	9671	833	CGI-S-Shore	TRUE	TRUE	FALSE
cg03633073	chr16	89437518	89437519	LOC100287036	100287036	49976	CGI	FALSE	TRUE	FALSE
cg03640071	chr11	134020750	134020751	NCAPD3	23310	73674	CGI-S-Shore	FALSE	TRUE	FALSE
cg03641640	chr13	114776416	114776417	RASA3	22821	121677	CGI	FALSE	TRUE	FALSE
cg03650282	chr17	64451448	64451449	PRKCA	5578	152521	Non-CGI	FALSE	TRUE	FALSE
cg03653726	chr7	2769253	2769254	AMZ1	155185	50089	CGI	FALSE	TRUE	FALSE
cg03668763	chr11	9549286	9549287	WEE1	7465	-45940	Non-CGI	FALSE	TRUE	FALSE
cg03684571	chr16	87468092	87468093	MAP1LC3B	81631	42290	CGI	FALSE	TRUE	FALSE
cg03693486	chr1	20914322	20914323	CDA	978	-1120	Non-CGI	TRUE	FALSE	FALSE
cg03702545	chr2	165812297	165812298	SLC38A11	151258	-261	CGI-S-Shore	TRUE	FALSE	FALSE
cg03707502	chr12	108957979	108957980	ISCU	23479	1684	CGI-S-Shore	FALSE	TRUE	FALSE
cg03711944	chr11	47377212	47377213	SLC39A13	91252	210	CGI	FALSE	TRUE	FALSE
cg03721705	chr6	15517467	15517468	DTNBP1	84062	145820	CGI	FALSE	TRUE	FALSE
cg03754074	chr2	27248790	27248791	TMEM214	54867	-6982	Non-CGI	FALSE	TRUE	FALSE
cg03771004	chr12	100867711	100867712	NR1H4	9971	159	Non-CGI	TRUE	FALSE	FALSE
cg03776194	chr16	88770966	88770967	RNF166	115992	1861	CGI-S-Shore	TRUE	TRUE	FALSE
cg03799283	chr15	96910011	96910012	MIR1469	100302258	33520	CGI	FALSE	FALSE	TRUE
cg03812679	chr17	38170632	38170633	CSF3	1440	-980	CGI-S-Shore	TRUE	FALSE	FALSE
cg03820176	chr5	31493119	31493120	DROSHA	29102	39161	Non-CGI	FALSE	TRUE	FALSE
cg03825790	chr20	10655644	10655645	JAG1	182	-949	CGI	TRUE	FALSE	FALSE
cg03837909	chr3	193506005	193506006	OPA1	4976	195071	Non-CGI	FALSE	FALSE	TRUE
cg03851878	chr15	23887710	23887711	MAGEL2	54551	5281	CGI-N-Shelf	FALSE	FALSE	TRUE
cg03864215	chr11	17408437	17408438	KCNJ11	3767	2439	CGI-N-Shore	TRUE	TRUE	FALSE
cg03868944	chr5	171808449	171808450	SH3PXD2B	285590	73076	CGI	FALSE	TRUE	FALSE
cg03876150	chr2	102369368	102369369	MAP4K4	9448	55202	Non-CGI	FALSE	TRUE	FALSE
cg03879291	chr3	43132552	43132553	GTDC2	84892	15011	Non-CGI	TRUE	TRUE	FALSE
cg03881294	chr2	11884333	11884334	LPIN1	23175	66611	CGI-N-Shore	FALSE	TRUE	FALSE
cg03885098	chr1	207991780	207991781	LOC148696	148696	55	CGI	TRUE	TRUE	FALSE
cg03910363	chr11	133823862	133823863	IGSF9B	22997	3016	CGI-N-Shore	FALSE	TRUE	FALSE
cg03927470	chr16	14030552	14030553	ERCC4	2072	16537	CGI-S-Shore	FALSE	TRUE	FALSE
cg03928367	chr20	34186995	34186996	FER1L4	80307	8487	CGI-N-Shore	FALSE	TRUE	FALSE
cg03929677	chr17	80763460	80763461	ZNF750	79755	34469	CGI	FALSE	TRUE	FALSE
cg03940776	chr6	158490013	158490014	SYNJ2	8871	87124	CGI-S-Shelf	TRUE	TRUE	FALSE
cg03961283	chr1	223566761	223566762	C1orf65	164127	45	CGI	TRUE	FALSE	FALSE
cg03973622	chr17	55520759	55520760	MSI2	124540	187546	Non-CGI	FALSE	TRUE	FALSE
cg03984866	chr4	8161776	8161777	ABLIM2	84448	-1216	CGI-S-Shore	TRUE	FALSE	FALSE
cg04011062	chr7	142724374	142724375	OR9A2	135924	-154	Non-CGI	TRUE	FALSE	FALSE
cg04018738	chr6	31760616	31760617	VARS	7407	3094	CGI-N-Shelf	FALSE	TRUE	FALSE
cg04029055	chr17	37213281	37213282	LOC100131347	100131347	8	Non-CGI	TRUE	FALSE	FALSE
cg04037952	chr2	131486950	131486951	GPR148	344561	306	CGI-S-Shore	TRUE	FALSE	FALSE
cg04041639	chr17	80817577	80817578	ZNF750	79755	-19645	CGI-S-Shore	FALSE	TRUE	FALSE
cg04055053	chr10	555133	555134	PRR26	414235	-140753	CGI	FALSE	TRUE	FALSE
cg04093208	chr13	39891557	39891558	NHLRC3	387921	279101	Non-CGI	FALSE	FALSE	TRUE
cg04095257	chr7	1062669	1062670	MIR339	442907	-6	CGI	TRUE	TRUE	FALSE
cg04118741	chr12	12551013	12551014	LOH12CR1	118426	40992	Non-CGI	FALSE	TRUE	FALSE
cg04121938	chr1	201509415	201509416	RPS10P7	376693	20382	CGI-S-Shore	FALSE	FALSE	TRUE
cg04128884	chr4	714516	714517	PCGF3	10336	14942	CGI	FALSE	TRUE	FALSE
cg04131792	chr5	3320943	3320944	LOC285577	285577	215263	CGI-N-Shelf	FALSE	FALSE	TRUE
cg04149356	chr5	158139306	158139307	EBF1	1879	387480	CGI	FALSE	TRUE	FALSE
cg04149585	chr8	136467891	136467892	KHDRBS3	10656	-1823	CGI-N-Shore	TRUE	FALSE	FALSE
cg04183158	chr11	1010983	1010984	MUC6	4588	25721	CGI	FALSE	TRUE	FALSE
cg04189187	chr10	6183528	6183529	PFKFB3	5209	-3313	CGI	FALSE	FALSE	TRUE
cg04194674	chr17	36715953	36715954	SRCIN1	80725	46228	CGI	TRUE	TRUE	FALSE
cg04194840	chr16	58545502	58545503	SETD6	79918	-3879	CGI	FALSE	TRUE	FALSE
cg04237822	chr7	157523541	157523542	LOC100506585	100506585	-123734	CGI	FALSE	TRUE	FALSE
cg04242349	chr17	79082840	79082841	MIR657	724027	16331	CGI	FALSE	TRUE	FALSE
cg04250681	chr14	71949117	71949118	LOC145474	145474	-5459	Non-CGI	FALSE	TRUE	FALSE
cg04265957	chr14	65237663	65237664	PLEKHG3	26030	66469	CGI-N-Shore	FALSE	TRUE	FALSE
cg04296885	chr1	155100420	155100421	EFNA1	1942	70	CGI	TRUE	FALSE	FALSE
cg04305599	chr2	86565973	86565974	REEP1	65055	-766	CGI-S-Shore	TRUE	FALSE	FALSE
cg04322596	chr10	114910865	114910866	TCF7L2	6934	200855	CGI	FALSE	TRUE	FALSE
cg04384112	chr16	75339383	75339384	BCAR1	9564	-37431	Non-CGI	FALSE	TRUE	FALSE
cg04398156	chr13	111639733	111639734	ANKRD10	55608	-72316	CGI-N-Shelf	FALSE	FALSE	TRUE
cg04400944	chr7	99017157	99017158	BUD31	8896	10564	CGI	FALSE	TRUE	FALSE
cg04402122	chr16	1544648	1544649	TELO2	9894	1295	CGI-S-Shore	FALSE	TRUE	FALSE
cg04406620	chr16	69499075	69499076	CYB5B	80777	40576	Non-CGI	FALSE	TRUE	FALSE
cg04407215	chr3	53304322	53304323	TKT	7086	-14191	Non-CGI	FALSE	FALSE	TRUE
cg04410987	chr11	70282745	70282746	CTTN	2017	38132	CGI-S-Shore	FALSE	FALSE	TRUE
cg04423187	chr19	15375450	15375451	EPHX3	79852	-31591	Non-CGI	FALSE	TRUE	FALSE
cg04428071	chr17	80225377	80225378	CSNK1D	1453	6215	Non-CGI	FALSE	TRUE	FALSE
cg04440724	chr16	4920505	4920506	GLYR1	84656	-23201	Non-CGI	FALSE	TRUE	FALSE
cg04466886	chr16	66521191	66521192	BEAN1	146227	59990	Non-CGI	FALSE	TRUE	FALSE
cg04471919	chr7	21584483	21584484	DNAH11	8701	1649	CGI-S-Shore	FALSE	TRUE	FALSE
cg04509266	chr1	207991597	207991598	LOC148696	148696	-125	CGI-N-Shore	TRUE	TRUE	FALSE
cg04560029	chr5	72901598	72901599	ARHGEF28	64283	-20383	Non-CGI	FALSE	FALSE	TRUE
cg04570540	chr13	113383816	113383817	ATP11A	23250	39172	CGI	FALSE	TRUE	FALSE
cg04588356	chr2	3473852	3473853	ADI1	55256	49496	CGI	FALSE	TRUE	FALSE
cg04600411	chr17	40269556	40269557	KAT2A	2648	3824	CGI	FALSE	TRUE	FALSE
cg04619882	chr1	109741037	109741038	SARS	6301	-15476	Non-CGI	FALSE	TRUE	FALSE
cg04623960	chr16	2162919	2162920	MIR4516	100616258	-20199	CGI	FALSE	TRUE	FALSE
cg04624228	chr8	38411598	38411599	C8orf86	389649	-25417	CGI	FALSE	FALSE	TRUE
cg04646987	chr5	14406732	14406733	FAM105A	54491	-175157	CGI-S-Shore	FALSE	TRUE	FALSE
cg04670451	chr16	87737549	87737550	KLHDC4	54758	62047	CGI	TRUE	TRUE	FALSE
cg04682120	chr19	4930815	4930816	MIR4747	100616337	-1882	CGI	TRUE	TRUE	FALSE
cg04682977	chr7	1062711	1062712	MIR339	442907	-48	CGI	TRUE	TRUE	FALSE
cg04694889	chr5	21484858	21484859	GUSBP1	728411	142915	CGI	TRUE	TRUE	FALSE
cg04698845	chr19	578093	578094	BSG	682	6767	CGI	TRUE	TRUE	FALSE
cg04712635	chr5	141203013	141203014	PCDH1	5097	54929	Non-CGI	FALSE	FALSE	TRUE
cg04760493	chr4	128981486	128981487	LARP1B	55132	-1015	CGI	TRUE	FALSE	FALSE
cg04766779	chr17	30596481	30596482	RHBDL3	162494	3285	CGI-S-Shelf	FALSE	TRUE	FALSE
cg04772644	chr6	33165428	33165429	SLC39A7	7922	-3173	CGI-N-Shelf	TRUE	TRUE	FALSE
cg04813697	chr10	22920025	22920026	PIP4K2A	5305	83476	Non-CGI	FALSE	TRUE	FALSE
cg04814352	chr13	97909916	97909917	MBNL2	10150	35341	Non-CGI	FALSE	TRUE	FALSE
cg04817300	chr11	128812875	128812876	TP53AIP1	63970	417	CGI	TRUE	FALSE	FALSE
cg04822177	chr11	66454651	66454652	RBM4B	83759	-9375	Non-CGI	FALSE	TRUE	FALSE
cg04831076	chr5	135186521	135186522	SLC25A48	153328	16155	CGI-N-Shore	FALSE	TRUE	FALSE
cg04845871	chr1	207996319	207996320	LOC148696	148696	4594	CGI-N-Shore	TRUE	FALSE	FALSE
cg04895640	chr1	36807418	36807419	EVA1B	55194	-17662	CGI	FALSE	TRUE	FALSE
cg04906462	chr7	130788305	130788306	FLJ43663	378805	6346	CGI-N-Shelf	FALSE	TRUE	FALSE
cg04907802	chr11	2753950	2753951	KCNQ1OT1	10984	-32721	CGI-S-Shore	FALSE	TRUE	FALSE
cg04911050	chr16	677664	677665	WFIKKN1	117166	-3346	CGI	TRUE	TRUE	FALSE
cg04914930	chr13	44785481	44785482	SERP2	387923	-162495	Non-CGI	FALSE	FALSE	TRUE
cg04915044	chr2	86263895	86263896	LOC90784	90784	-12903	Non-CGI	FALSE	TRUE	FALSE
cg04920032	chr12	50262986	50262987	BCDIN3D	144233	-26073	Non-CGI	FALSE	TRUE	FALSE
cg04921335	chr17	44790735	44790736	WNT3	7473	105345	Non-CGI	FALSE	TRUE	FALSE
cg04939569	chr7	138518204	138518205	ATP6V0A4	50617	-35262	Non-CGI	FALSE	TRUE	FALSE
cg04951476	chr6	3848243	3848244	FAM50B	26240	-1387	CGI-N-Shore	TRUE	FALSE	FALSE
cg04960065	chr4	185189300	185189301	ENPP6	133121	-50185	Non-CGI	FALSE	FALSE	TRUE
cg04962621	chr16	4714733	4714734	NUDT16L1	84309	-28959	CGI-S-Shore	FALSE	TRUE	FALSE
cg04986504	chr11	12031266	12031267	DKK3	27122	48	CGI-S-Shore	TRUE	FALSE	FALSE
cg04987122	chr16	2213440	2213441	TRAF7	84231	7640	CGI-N-Shore	FALSE	TRUE	FALSE
cg04999309	chr2	237018300	237018301	GBX2	2637	58350	Non-CGI	FALSE	TRUE	FALSE
cg05005073	chr1	39513326	39513327	NDUFS5	4725	21358	Non-CGI	FALSE	FALSE	TRUE
cg05007126	chr20	1310884	1310885	SDCBP2	27111	-1004	Non-CGI	TRUE	TRUE	FALSE
cg05015635	chr9	89563603	89563604	GAS1	2619	-1498	CGI	TRUE	FALSE	FALSE
cg05016066	chr16	66377143	66377144	CDH5	1003	-23380	Non-CGI	FALSE	FALSE	TRUE
cg05017309	chr6	154361687	154361688	OPRM1	4988	30055	CGI-S-Shore	FALSE	TRUE	FALSE
cg05054522	chr11	64146606	64146607	MIR1237	100302280	10531	CGI	FALSE	FALSE	TRUE
cg05062489	chr3	109404367	109404368	FLJ25363	401082	275529	Non-CGI	FALSE	FALSE	TRUE
cg05080940	chr16	11256561	11256562	RMI2	116028	-86943	Non-CGI	FALSE	TRUE	FALSE
cg05123845	chr4	104918078	104918079	TACR3	6870	-277104	Non-CGI	FALSE	FALSE	TRUE
cg05132999	chr1	51796987	51796988	TTC39A	22996	13796	CGI-S-Shore	TRUE	TRUE	FALSE
cg05135288	chr16	717707	717708	RHOT2	89941	-374	CGI-N-Shore	TRUE	TRUE	FALSE
cg05152479	chr12	109246508	109246509	SSH1	54434	4849	CGI-N-Shelf	FALSE	TRUE	FALSE
cg05152974	chr14	101970659	101970660	MIR1247	100302145	56098	CGI-S-Shelf	FALSE	FALSE	TRUE
cg05160197	chr1	203135890	203135891	MYBPH	4608	9050	CGI-S-Shore	FALSE	TRUE	FALSE
cg05171197	chr2	240230850	240230851	MIR4269	100423043	3692	CGI	FALSE	TRUE	FALSE
cg05178005	chr10	88561989	88561990	BMPR1A	657	45592	Non-CGI	FALSE	TRUE	FALSE
cg05194509	chr2	18055774	18055775	KCNS3	3790	-3338	CGI-N-Shelf	FALSE	FALSE	TRUE
cg05197164	chr13	113724548	113724549	F7	2155	-35555	CGI	FALSE	TRUE	FALSE
cg05201300	chr5	172443740	172443741	SNORA74B	677841	-3987	Non-CGI	FALSE	TRUE	FALSE
cg05208895	chr7	100276062	100276063	GNB2	2783	4698	CGI	FALSE	TRUE	FALSE
cg05220042	chr16	721934	721935	RHBDL1	9028	-3770	CGI	FALSE	TRUE	FALSE
cg05222604	chr16	58537227	58537228	SETD6	79918	-12154	CGI-S-Shore	FALSE	TRUE	FALSE
cg05265234	chr22	38884016	38884017	DDX17	10521	19647	Non-CGI	TRUE	TRUE	FALSE
cg05267427	chr4	146831054	146831055	ZNF827	152485	28551	Non-CGI	FALSE	TRUE	FALSE
cg05278074	chr7	92442568	92442569	CDK6	1021	23371	Non-CGI	FALSE	TRUE	FALSE
cg05298696	chr2	70188691	70188692	ASPRV1	151516	704	Non-CGI	TRUE	FALSE	FALSE
cg05304507	chr6	116381966	116381967	FRK	2444	-44	Non-CGI	TRUE	FALSE	FALSE
cg05323448	chr10	125318681	125318682	GPR26	2849	-107188	CGI	FALSE	FALSE	TRUE
cg05331791	chr20	62383275	62383276	SLC2A4RG	56731	12063	CGI	FALSE	TRUE	FALSE
cg05343811	chr14	75590896	75590897	NEK9	91754	2880	CGI-N-Shelf	FALSE	TRUE	FALSE
cg05362168	chr16	67562128	67562129	FAM65A	79567	-587	CGI-N-Shore	TRUE	FALSE	FALSE
cg05364072	chr1	36643981	36643982	MAP7D1	55700	22177	CGI	FALSE	TRUE	FALSE
cg05369942	chr4	142228617	142228618	ZNF330	27309	86567	Non-CGI	FALSE	FALSE	TRUE
cg05383958	chr3	43914187	43914188	ABHD5	51099	181811	Non-CGI	FALSE	FALSE	TRUE
cg05414254	chr16	53535931	53535932	AKTIP	64400	1237	CGI-N-Shore	FALSE	TRUE	FALSE
cg05437692	chr4	149362435	149362436	NR3C2	4306	1235	CGI-N-Shore	FALSE	TRUE	FALSE
cg05455036	chr1	202828149	202828150	LOC148709	148709	-2731	CGI-N-Shore	FALSE	TRUE	FALSE
cg05482603	chr10	118607718	118607719	ENO4	387712	-1303	CGI-N-Shore	TRUE	TRUE	FALSE
cg05485379	chr3	197121410	197121411	DLG1	1739	-95266	Non-CGI	FALSE	FALSE	TRUE
cg05495546	chr5	113390551	113390552	KCNN2	3781	-307463	CGI-N-Shore	FALSE	FALSE	TRUE
cg05497240	chr5	154199788	154199789	C5orf4	10826	30423	Non-CGI	FALSE	TRUE	FALSE
cg05509787	chr2	220042852	220042853	FAM134A	79137	-85	CGI	TRUE	FALSE	FALSE
cg05514680	chr17	7461556	7461557	TNFSF13	8741	-51	CGI-N-Shelf	TRUE	TRUE	FALSE
cg05523897	chr1	2139175	2139176	C1orf86	199990	-2	CGI	TRUE	FALSE	FALSE
cg05538432	chr12	7167751	7167752	LPCAT3	10162	-41908	Non-CGI	TRUE	TRUE	FALSE
cg05551003	chr3	11267072	11267073	ATG7	10533	-46936	Non-CGI	TRUE	TRUE	FALSE
cg05552874	chr10	91153143	91153144	IFIT1	3434	820	Non-CGI	FALSE	TRUE	FALSE
cg05553452	chr3	5254757	5254758	EDEM1	9695	25425	Non-CGI	FALSE	TRUE	FALSE
cg05573381	chr5	1653258	1653259	LOC728613	728613	-19137	CGI-N-Shore	FALSE	FALSE	TRUE
cg05585742	chr4	812684	812685	CPLX1	10815	7259	CGI	FALSE	TRUE	FALSE
cg05603258	chr18	56595821	56595822	ZNF532	55205	65759	Non-CGI	FALSE	TRUE	FALSE
cg05605194	chr2	7739870	7739871	LOC100506274	100506274	178477	CGI	FALSE	FALSE	TRUE
cg05609780	chr3	24001171	24001172	NKIRAS1	28512	-13117	Non-CGI	FALSE	TRUE	FALSE
cg05622577	chr10	33710900	33710901	NRP1	8829	-86893	Non-CGI	FALSE	FALSE	TRUE
cg05651995	chr16	4751307	4751308	NUDT16L1	84309	7612	CGI	TRUE	TRUE	FALSE
cg05655247	chr1	1065028	1065029	LOC254099	254099	-7367	CGI-S-Shore	FALSE	FALSE	TRUE
cg05657709	chr3	121742496	121742497	ILDR1	286676	-1368	CGI-S-Shore	TRUE	FALSE	FALSE
cg05673079	chr10	110084660	110084661	SORCS1	114815	-1160193	Non-CGI	FALSE	FALSE	TRUE
cg05683203	chr13	111670642	111670643	ARHGEF7	8874	-96980	CGI	FALSE	FALSE	TRUE
cg05721839	chr10	134751598	134751599	NA	255352	4489	CGI	FALSE	TRUE	FALSE
cg05749642	chr16	89982268	89982269	MC1R	4157	-2017	CGI-S-Shore	FALSE	FALSE	TRUE
cg05759166	chr8	10452896	10452897	RP1L1	94137	59719	CGI-N-Shore	FALSE	FALSE	TRUE
cg05788089	chr13	114082984	114082985	ADPRHL1	113622	24853	CGI-S-Shore	FALSE	TRUE	FALSE
cg05796178	chr8	20110988	20110989	LZTS1	11178	1813	CGI	FALSE	TRUE	FALSE
cg05797821	chr11	78530645	78530646	NARS2	79731	-244735	CGI-N-Shelf	FALSE	TRUE	FALSE
cg05800368	chr9	124658957	124658958	TTLL11	158135	196926	CGI	FALSE	TRUE	FALSE
cg05802478	chr3	195634844	195634845	TNK2	10188	3970	CGI-N-Shore	TRUE	TRUE	FALSE
cg05828793	chr16	5142255	5142256	FAM86A	196483	5532	CGI-S-Shore	FALSE	TRUE	FALSE
cg05829224	chr12	4724708	4724709	AKAP3	10566	29648	Non-CGI	FALSE	TRUE	FALSE
cg05852477	chr11	1037640	1037641	MUC6	4588	-933	CGI-S-Shore	TRUE	FALSE	FALSE
cg05853772	chr16	8957249	8957250	CARHSP1	23589	5612	CGI-N-Shelf	FALSE	TRUE	FALSE
cg05859076	chr3	128838350	128838351	RAB43	339122	2641	CGI-N-Shore	FALSE	TRUE	FALSE
cg05861512	chr14	94442960	94442961	ASB2	51676	114	Non-CGI	TRUE	FALSE	FALSE
cg05864868	chr6	148899489	148899490	UST	10090	-168780	Non-CGI	FALSE	FALSE	TRUE
cg05877768	chr10	34427076	34427077	LINC00838	100505583	-365467	Non-CGI	FALSE	TRUE	FALSE
cg05881566	chr11	61522765	61522766	DKFZP434K028	26070	2369	CGI-S-Shelf	TRUE	TRUE	FALSE
cg05888643	chr11	64140424	64140425	MIR1237	100302280	4349	CGI-S-Shore	FALSE	FALSE	TRUE
cg05892024	chr7	553412	553413	PDGFA	5154	6067	CGI-S-Shore	TRUE	TRUE	FALSE
cg05894948	chr19	35523468	35523469	SCN1B	6324	1875	CGI-S-Shore	FALSE	TRUE	FALSE
cg05931542	chr12	125103206	125103207	NCOR2	9612	-51195	CGI-S-Shore	FALSE	FALSE	TRUE
cg05946942	chr11	19561797	19561798	NAV2-AS4	399876	-16171	Non-CGI	FALSE	TRUE	FALSE
cg05951817	chr17	28562142	28562143	SLC6A4	6532	810	CGI-N-Shore	FALSE	TRUE	FALSE
cg05966228	chr16	67666442	67666443	RLTPR	146206	-12586	Non-CGI	FALSE	TRUE	FALSE
cg05966641	chr6	134637428	134637429	SGK1	6446	1766	CGI-N-Shore	FALSE	TRUE	FALSE
cg05995267	chr16	29822529	29822530	PRRT2	112476	-878	CGI-N-Shore	TRUE	TRUE	FALSE
cg06015525	chr12	57872123	57872124	MARS	4141	-8952	CGI-S-Shore	TRUE	TRUE	FALSE
cg06018119	chr22	50706650	50706651	MAPK11	5600	2688	CGI-S-Shore	FALSE	TRUE	FALSE
cg06033789	chr8	105899330	105899331	LRP12	29967	-298077	Non-CGI	FALSE	FALSE	TRUE
cg06048102	chr13	51575027	51575028	GUCY1B2	2974	79969	Non-CGI	FALSE	TRUE	FALSE
cg06068039	chr6	34031208	34031209	MIR1275	100302123	-63379	Non-CGI	TRUE	TRUE	FALSE
cg06068369	chr6	105837504	105837505	PREP	5550	13493	Non-CGI	FALSE	TRUE	FALSE
cg06085743	chr1	1245014	1245015	ACAP3	116983	-24	CGI	TRUE	TRUE	FALSE
cg06087101	chr6	35551932	35551933	TULP1	7287	-71284	Non-CGI	FALSE	TRUE	FALSE
cg06092178	chr3	50708855	50708856	MIR4787	100616138	-3654	CGI-N-Shelf	FALSE	FALSE	TRUE
cg06092948	chr10	91061294	91061295	IFIT2	3433	-410	Non-CGI	TRUE	TRUE	FALSE
cg06093152	chr1	212662017	212662018	NENF	29937	55787	Non-CGI	FALSE	FALSE	TRUE
cg06112654	chr10	35505599	35505600	CCNY	219771	-30352	CGI-S-Shore	FALSE	FALSE	TRUE
cg06127335	chr2	242011247	242011248	MTERFD2	130916	30498	CGI	FALSE	TRUE	FALSE
cg06136702	chr6	31082631	31082632	PSORS1C1	170679	22	Non-CGI	TRUE	FALSE	FALSE
cg06137032	chr11	61522807	61522808	DKFZP434K028	26070	2327	CGI-S-Shelf	TRUE	TRUE	FALSE
cg06163701	chr3	51994615	51994616	GPR62	118442	5284	Non-CGI	TRUE	TRUE	FALSE
cg06191390	chr2	73299285	73299286	SFXN5	94097	-319	CGI	TRUE	FALSE	FALSE
cg06201861	chr16	84877964	84877965	CRISPLD2	83716	24376	Non-CGI	FALSE	TRUE	FALSE
cg06204948	chr11	63656090	63656091	RCOR2	283248	28224	Non-CGI	TRUE	TRUE	FALSE
cg06233202	chr2	64501134	64501135	LINC00309	150992	-68514	Non-CGI	FALSE	FALSE	TRUE
cg06236737	chr16	89950219	89950220	TCF25	22980	10224	CGI	TRUE	TRUE	FALSE
cg06240947	chr8	140717372	140717373	KCNK9	51305	-2072	CGI-S-Shore	FALSE	FALSE	TRUE
cg06264060	chr22	41075007	41075008	MCHR1	2847	-173	CGI-N-Shelf	TRUE	FALSE	FALSE
cg06264922	chr11	1319648	1319649	TOLLIP	54472	11242	CGI-S-Shore	FALSE	TRUE	FALSE
cg06267617	chr1	172291727	172291728	C1orf105	92346	-98099	Non-CGI	FALSE	TRUE	FALSE
cg06281080	chr2	209040082	209040083	CRYGA	1418	-11784	Non-CGI	FALSE	TRUE	FALSE
cg06315598	chr16	22692462	22692463	MIR548D2	693131	-37139	Non-CGI	FALSE	FALSE	TRUE
cg06327227	chr6	158439902	158439903	SYNJ2	8871	37013	Non-CGI	FALSE	TRUE	FALSE
cg06330323	chr16	2132315	2132316	MIR1225	100188847	7968	CGI	TRUE	TRUE	FALSE
cg06332842	chr17	79100214	79100215	MIR338	442906	-464	CGI	TRUE	TRUE	FALSE
cg06357371	chr1	40136763	40136764	NT5C1A	84618	945	CGI-N-Shore	FALSE	TRUE	FALSE
cg06358636	chr6	133480830	133480831	LINC00326	285735	71610	Non-CGI	FALSE	FALSE	TRUE
cg06368760	chr2	237018205	237018206	GBX2	2637	58445	Non-CGI	FALSE	TRUE	FALSE
cg06406458	chr10	128810499	128810500	FAM196A	642938	183921	CGI	FALSE	TRUE	FALSE
cg06417644	chr16	28081331	28081332	GSG1L	146395	-6500	CGI	FALSE	FALSE	TRUE
cg06419236	chr2	240650018	240650019	LOC150935	150935	-34534	CGI-N-Shore	FALSE	FALSE	TRUE
cg06419964	chr17	34965294	34965295	MRM1	79922	7268	Non-CGI	FALSE	TRUE	FALSE
cg06423425	chr7	2555549	2555550	LFNG	3955	3385	CGI-N-Shelf	TRUE	TRUE	FALSE
cg06427816	chr17	1090326	1090327	ABR	29	288	CGI-N-Shelf	TRUE	FALSE	FALSE
cg06430753	chr5	958808	958809	LOC100506688	100506688	38645	CGI	FALSE	FALSE	TRUE
cg06448070	chr19	11312725	11312726	KANK2	25959	-4257	CGI	FALSE	TRUE	FALSE
cg06478504	chr2	240174613	240174614	MIR4269	100423043	-52542	CGI-S-Shore	FALSE	TRUE	FALSE
cg06479142	chr3	71636085	71636086	FOXP1	27086	-2944	CGI-S-Shelf	FALSE	FALSE	TRUE
cg06486409	chr7	130868715	130868716	MKLN1	4289	73859	Non-CGI	FALSE	TRUE	FALSE
cg06495347	chr12	56391451	56391452	SUOX	6821	407	CGI-S-Shore	TRUE	TRUE	FALSE
cg06498468	chr16	82203702	82203703	MPHOSPH6	10200	125	CGI	FALSE	TRUE	FALSE
cg06505273	chr16	24850292	24850293	SLC5A11	115584	-7022	Non-CGI	FALSE	FALSE	TRUE
cg06518327	chr7	157261163	157261164	MIR153-2	406945	105949	CGI	FALSE	FALSE	TRUE
cg06529996	chr2	3469212	3469213	ADI1	55256	54136	CGI	FALSE	TRUE	FALSE
cg06543221	chr16	86899685	86899686	FOXL1	2300	287569	CGI-N-Shelf	FALSE	FALSE	TRUE
cg06563873	chr19	10506536	10506537	MIR1181	100302213	7676	CGI	FALSE	TRUE	FALSE
cg06570930	chr19	38744764	38744765	PPP1R14A	94274	2465	CGI-N-Shore	FALSE	TRUE	FALSE
cg06586578	chr10	134550058	134550059	NKX6-2	84504	49477	CGI	FALSE	TRUE	FALSE
cg06603309	chr11	2724144	2724145	KCNQ1OT1	10984	-2915	CGI-S-Shelf	FALSE	TRUE	FALSE
cg06613263	chr5	142779552	142779553	NR3C1	2908	35523	CGI-N-Shelf	TRUE	TRUE	FALSE
cg06613286	chr12	128850903	128850904	MIR3612	100500817	72265	CGI-S-Shore	FALSE	TRUE	FALSE
cg06639053	chr12	111837470	111837471	SH2B3	10019	-6280	CGI-S-Shelf	FALSE	FALSE	TRUE
cg06639923	chr7	5534978	5534979	MIR589	693174	568	CGI-S-Shore	FALSE	TRUE	FALSE
cg06642012	chr16	87736889	87736890	KLHDC4	54758	62707	CGI	TRUE	TRUE	FALSE
cg06647026	chr19	3964837	3964838	MIR637	693222	-3326	CGI	FALSE	TRUE	FALSE
cg06650379	chr4	1185915	1185916	LOC100130872	100130872	16833	CGI-N-Shore	FALSE	TRUE	FALSE
cg06670039	chr16	12530246	12530247	MIR4718	100616195	-283930	CGI	FALSE	TRUE	FALSE
cg06678567	chr16	25851007	25851008	HS3ST4	9951	147659	Non-CGI	FALSE	TRUE	FALSE
cg06679334	chr17	35241844	35241845	LHX1	3975	-52926	CGI-N-Shore	FALSE	FALSE	TRUE
cg06692315	chr2	70417854	70417855	C2orf42	54980	295	CGI	FALSE	TRUE	FALSE
cg06703803	chr12	110811045	110811046	ANAPC7	51434	30488	Non-CGI	FALSE	TRUE	FALSE
cg06706159	chr19	18260350	18260351	PIK3R2	5296	-3664	CGI	FALSE	TRUE	FALSE
cg06711298	chr2	97530602	97530603	SEMA4C	54910	5131	CGI-S-Shelf	TRUE	TRUE	FALSE
cg06730285	chr5	139945107	139945108	SLC35A4	113829	686	CGI-S-Shore	TRUE	TRUE	FALSE
cg06730718	chr16	50186224	50186225	PAPD5	64282	-603	CGI-N-Shore	TRUE	FALSE	FALSE
cg06743312	chr12	6661122	6661123	IFFO1	25900	4125	CGI-S-Shelf	TRUE	TRUE	FALSE
cg06748146	chr10	71104724	71104725	TACR2	6865	71948	Non-CGI	FALSE	TRUE	FALSE
cg06756164	chr1	109490978	109490979	CLCC1	23155	15131	Non-CGI	FALSE	TRUE	FALSE
cg06761530	chr17	75373219	75373220	MIR4316	100422851	19915	CGI	FALSE	TRUE	FALSE
cg06779606	chr7	3041079	3041080	CARD11	84433	42428	Non-CGI	FALSE	TRUE	FALSE
cg06787731	chr14	38069079	38069080	FOXA1	3169	-4589	CGI	FALSE	FALSE	TRUE
cg06787912	chr21	35553467	35553468	LINC00310	114036	488	Non-CGI	FALSE	TRUE	FALSE
cg06800040	chr17	42427647	42427648	GRN	2896	5155	CGI-N-Shelf	TRUE	TRUE	FALSE
cg06805925	chr17	16233044	16233045	CENPV	201161	23766	Non-CGI	FALSE	FALSE	TRUE
cg06816254	chr16	21287038	21287039	CRYM-AS1	400508	-25130	CGI-N-Shelf	FALSE	TRUE	FALSE
cg06820545	chr3	39031761	39031762	SCN11A	11280	-39708	Non-CGI	FALSE	FALSE	TRUE
cg06821641	chr1	2016915	2016916	PRKCZ	5590	35005	CGI	FALSE	TRUE	FALSE
cg06848185	chr17	75368902	75368903	MIR4316	100422851	24232	CGI	TRUE	TRUE	FALSE
cg06852942	chr5	476497	476498	PP7080	25845	-3416	CGI	TRUE	TRUE	FALSE
cg06868132	chr5	178987429	178987430	RUFY1	80230	9857	CGI-S-Shore	FALSE	TRUE	FALSE
cg06869212	chr17	79099882	79099883	MIR338	442906	-132	CGI-S-Shore	TRUE	TRUE	FALSE
cg06873457	chr22	30116319	30116320	CABP7	164633	-23	CGI	TRUE	FALSE	FALSE
cg06886738	chr14	102515026	102515027	DYNC1H1	1778	84160	CGI	FALSE	TRUE	FALSE
cg06919790	chr6	33378912	33378913	PHF1	5252	138	CGI	TRUE	FALSE	FALSE
cg06923616	chr18	66381343	66381344	TMX3	54495	1008	CGI-N-Shore	TRUE	TRUE	FALSE
cg06941159	chr16	28875210	28875211	ATP2A1	487	-14597	CGI	TRUE	TRUE	FALSE
cg06941836	chr1	205294816	205294817	NUAK2	81788	-3932	CGI-S-Shelf	FALSE	FALSE	TRUE
cg06945634	chr8	30413794	30413795	SMIM18	100507341	-82321	CGI-N-Shore	FALSE	TRUE	FALSE
cg06971761	chr21	45379595	45379596	TRAPPC10	7109	-52609	CGI	TRUE	TRUE	FALSE
cg06984176	chr6	15501652	15501653	DTNBP1	84062	161635	CGI	FALSE	TRUE	FALSE
cg06987348	chr5	91715141	91715142	ARRDC3	57561	-1035991	Non-CGI	FALSE	TRUE	FALSE
cg06990967	chr5	2041382	2041383	IRX4	50805	-158501	CGI-S-Shelf	FALSE	FALSE	TRUE
cg07003407	chr21	45232601	45232602	LOC284837	284837	-152	CGI-S-Shore	TRUE	FALSE	FALSE
cg07005654	chr4	108918439	108918440	HADH	3033	7568	Non-CGI	FALSE	TRUE	FALSE
cg07008911	chr16	2145598	2145599	MIR1225	100188847	-5312	CGI-N-Shore	FALSE	TRUE	FALSE
cg07015749	chr1	6085995	6085996	NPHP4	261734	-33461	CGI-N-Shore	TRUE	TRUE	FALSE
cg07024996	chr2	27601540	27601541	ZNF513	130557	2069	CGI	FALSE	TRUE	FALSE
cg07026882	chr13	113417167	113417168	ATP11A	23250	72523	CGI	FALSE	TRUE	FALSE
cg07053727	chr20	36965646	36965647	LBP	3929	-9237	Non-CGI	FALSE	TRUE	FALSE
cg07058109	chr17	40264861	40264862	DHX58	79132	-109	Non-CGI	TRUE	FALSE	FALSE
cg07062262	chr11	72142353	72142354	CLPB	81570	3329	CGI-N-Shelf	FALSE	TRUE	FALSE
cg07078467	chr17	78893612	78893613	CHMP6	79643	-72027	CGI	FALSE	TRUE	FALSE
cg07081759	chr10	126330905	126330906	FAM53B	9679	148000	CGI-N-Shore	FALSE	TRUE	FALSE
cg07095818	chr20	43919338	43919339	RBPJL	11317	-16151	CGI-N-Shelf	FALSE	FALSE	TRUE
cg07118196	chr16	89462418	89462419	LOC100287036	100287036	74876	CGI-S-Shore	FALSE	TRUE	FALSE
cg07134230	chr1	156631248	156631249	NES	10763	15939	CGI-S-Shore	FALSE	FALSE	TRUE
cg07134292	chr1	51702069	51702070	RNF11	26994	123	CGI	TRUE	FALSE	FALSE
cg07139165	chr11	133823125	133823126	IGSF9B	22997	3753	CGI-S-Shore	FALSE	TRUE	FALSE
cg07182163	chr14	79511907	79511908	NRXN3	9369	874978	Non-CGI	FALSE	TRUE	FALSE
cg07213414	chr16	23153611	23153612	USP31	57478	6978	Non-CGI	FALSE	TRUE	FALSE
cg07213780	chr7	158342600	158342601	MIR595	693180	-17094	CGI-S-Shore	FALSE	TRUE	FALSE
cg07216436	chr3	154951034	154951035	LOC100507537	100507537	60453	Non-CGI	FALSE	FALSE	TRUE
cg07223240	chr6	170468271	170468272	LOC154449	154449	103384	CGI	FALSE	FALSE	TRUE
cg07223952	chr8	120684721	120684722	ENPP2	5168	-33614	CGI	FALSE	FALSE	TRUE
cg07240413	chr10	8145066	8145067	GATA3	2625	48398	Non-CGI	FALSE	FALSE	TRUE
cg07264634	chr4	565955	565956	PDE6B	5158	-53406	CGI-N-Shelf	FALSE	FALSE	TRUE
cg07268332	chr11	10476494	10476495	AMPD3	272	4625	CGI-S-Shelf	TRUE	TRUE	FALSE
cg07296665	chr11	2109690	2109691	MIR483	619552	45747	CGI	FALSE	FALSE	TRUE
cg07302959	chr7	92198639	92198640	FAM133B	257415	21065	Non-CGI	FALSE	TRUE	FALSE
cg07305719	chr10	64133406	64133407	RTKN2	219790	-104939	CGI-N-Shore	TRUE	TRUE	FALSE
cg07306253	chr15	41062224	41062225	C15orf62	643338	64	CGI-S-Shore	TRUE	TRUE	FALSE
cg07317616	chr17	80725061	80725062	TBCD	6904	15120	CGI-S-Shore	FALSE	TRUE	FALSE
cg07329251	chr11	10476662	10476663	AMPD3	272	4793	CGI-S-Shelf	TRUE	TRUE	FALSE
cg07344355	chr15	40633416	40633417	C15orf52	388115	-247	Non-CGI	TRUE	FALSE	FALSE
cg07346187	chr6	149775621	149775622	ZC3H12D	340152	30525	CGI-S-Shelf	FALSE	TRUE	FALSE
cg07366503	chr1	228330085	228330086	GUK1	2987	2299	CGI-S-Shore	FALSE	TRUE	FALSE
cg07375150	chr3	151046450	151046451	P2RY13	53829	885	Non-CGI	FALSE	TRUE	FALSE
cg07380200	chr15	48874903	48874904	FBN1	2200	63080	Non-CGI	FALSE	TRUE	FALSE
cg07388482	chr10	134558009	134558010	NKX6-2	84504	41526	CGI	FALSE	TRUE	FALSE
cg07398954	chr12	124856557	124856558	FAM101A	144347	82846	CGI-N-Shore	FALSE	TRUE	FALSE
cg07422042	chr22	20194554	20194555	LOC150197	150197	698	Non-CGI	TRUE	FALSE	FALSE
cg07448824	chr16	87468247	87468248	MAP1LC3B	81631	42445	CGI-S-Shore	FALSE	TRUE	FALSE
cg07452879	chr17	71274436	71274437	CPSF4L	642843	-16416	Non-CGI	FALSE	FALSE	TRUE
cg07456081	chr14	104585948	104585949	MIR3545	100616173	-2107	CGI-S-Shore	FALSE	FALSE	TRUE
cg07456546	chr21	43726315	43726316	TFF3	7033	9389	CGI	FALSE	FALSE	TRUE
cg07465344	chr17	4849412	4849413	PFN1	5216	2411	CGI-N-Shore	FALSE	TRUE	FALSE
cg07470207	chr8	132828746	132828747	EFR3A	23167	-87608	Non-CGI	FALSE	FALSE	TRUE
cg07486017	chr11	61522799	61522800	DKFZP434K028	26070	2335	CGI-S-Shelf	TRUE	TRUE	FALSE
cg07519259	chr2	31520167	31520168	EHD3	30845	63286	Non-CGI	FALSE	FALSE	TRUE
cg07529738	chr5	447797	447798	EXOC3	11336	4462	CGI	FALSE	TRUE	FALSE
cg07575086	chr8	1790905	1790906	ARHGEF10	9639	18755	CGI-S-Shore	FALSE	TRUE	FALSE
cg07581257	chr14	102505802	102505803	DYNC1H1	1778	74936	CGI	FALSE	TRUE	FALSE
cg07587588	chr8	81083356	81083357	TPD52	7163	478	CGI-N-Shore	TRUE	TRUE	FALSE
cg07594954	chr3	132990608	132990609	BFSP2	8419	-128180	Non-CGI	FALSE	TRUE	FALSE
cg07620025	chr4	3692142	3692143	LOC100133461	100133461	-12559	CGI	FALSE	FALSE	TRUE
cg07628084	chr6	112576119	112576120	LAMA4	3910	-290	CGI-S-Shore	TRUE	FALSE	FALSE
cg07639783	chr7	1610747	1610748	PSMG3-AS1	114796	1037	CGI-S-Shore	TRUE	TRUE	FALSE
cg07673080	chr2	240241154	240241155	MIR4269	100423043	13996	CGI-S-Shore	FALSE	TRUE	FALSE
cg07708487	chr16	89387014	89387015	LOC100287036	100287036	-525	CGI	TRUE	TRUE	FALSE
cg07732471	chr6	31635946	31635947	GPANK1	7918	-1885	CGI-S-Shore	TRUE	TRUE	FALSE
cg07739188	chr8	132790307	132790308	EFR3A	23167	-126047	Non-CGI	FALSE	FALSE	TRUE
cg07741192	chr16	4690013	4690014	MGRN1	23295	15187	Non-CGI	TRUE	TRUE	FALSE
cg07748741	chr10	99330056	99330057	ANKRD2	26287	-2198	CGI	FALSE	TRUE	FALSE
cg07761912	chr1	179846929	179846930	TOR1AIP2	163590	10	CGI	TRUE	FALSE	FALSE
cg07778315	chr12	133380627	133380628	GOLGA3	2802	24797	CGI	FALSE	TRUE	FALSE
cg07795168	chr5	180028818	180028819	SCGB3A1	92304	-10330	CGI	FALSE	TRUE	FALSE
cg07795964	chr4	2066320	2066321	NAT8L	339983	5080	CGI	FALSE	TRUE	FALSE
cg07805542	chr1	9779309	9779310	C1orf200	644997	-64664	CGI-N-Shore	FALSE	TRUE	FALSE
cg07807210	chr18	74770431	74770432	MBP	4155	74341	CGI	FALSE	TRUE	FALSE
cg07835181	chr16	1525278	1525279	CLCN7	1186	-192	CGI	TRUE	FALSE	FALSE
cg07835482	chr2	182656091	182656092	SSFA2	6744	-100379	Non-CGI	FALSE	FALSE	TRUE
cg07838270	chr16	86861522	86861523	FOXL1	2300	249406	CGI	FALSE	FALSE	TRUE
cg07847097	chr19	17837638	17837639	MAP1S	55201	7334	CGI	FALSE	TRUE	FALSE
cg07854457	chr5	126898200	126898201	PRRC1	133619	44890	Non-CGI	FALSE	FALSE	TRUE
cg07861456	chr16	75654252	75654253	ADAT1	23536	2967	CGI-N-Shelf	FALSE	TRUE	FALSE
cg07863439	chr10	124266386	124266387	HTRA1	5654	45344	CGI	FALSE	TRUE	FALSE
cg07891774	chr17	80560124	80560125	WDR45B	56270	46285	CGI-S-Shore	FALSE	TRUE	FALSE
cg07902749	chr2	37813553	37813554	CDC42EP3	10602	85771	Non-CGI	FALSE	FALSE	TRUE
cg07908679	chr7	156371426	156371427	LINC00244	64433	38240	CGI	FALSE	FALSE	TRUE
cg07928065	chr17	9694739	9694740	DHRS7C	201140	-124	Non-CGI	TRUE	FALSE	FALSE
cg07947930	chr1	203444945	203444946	PRELP	5549	61	Non-CGI	TRUE	FALSE	FALSE
cg07960138	chr4	812884	812885	CPLX1	10815	7059	CGI	FALSE	TRUE	FALSE
cg07972458	chr1	204535000	204535001	MDM4	4194	49492	CGI-S-Shelf	FALSE	TRUE	FALSE
cg07972805	chr11	133916608	133916609	LOC100128239	100128239	14440	CGI-N-Shore	FALSE	FALSE	TRUE
cg07987051	chr16	5080405	5080406	NAGPA-AS1	100507589	-3296	CGI-S-Shelf	TRUE	TRUE	FALSE
cg07990880	chr16	85543297	85543298	GSE1	23199	-101730	CGI	FALSE	FALSE	TRUE
cg07993547	chr19	18210197	18210198	IL12RB1	3594	-570	CGI	TRUE	TRUE	FALSE
cg07999415	chr11	71724338	71724339	IL18BP	10068	14379	CGI-N-Shore	TRUE	TRUE	FALSE
cg08003102	chr4	88451496	88451497	SPARCL1	8404	-840	Non-CGI	TRUE	FALSE	FALSE
cg08007074	chr16	84346361	84346362	WFDC1	58189	17959	CGI-N-Shore	FALSE	TRUE	FALSE
cg08012275	chr11	1464300	1464301	BRSK2	9024	53170	CGI-N-Shore	FALSE	TRUE	FALSE
cg08029603	chr1	854824	854825	LOC100130417	100130417	-6	CGI-N-Shore	TRUE	FALSE	FALSE
cg08031413	chr1	154528842	154528843	UBE2Q1	55585	2276	CGI-N-Shore	FALSE	TRUE	FALSE
cg08034413	chr13	114115128	114115129	ADPRHL1	113622	-7288	CGI	FALSE	TRUE	FALSE
cg08048178	chr3	195601155	195601156	TNK2	10188	37659	CGI	TRUE	TRUE	FALSE
cg08050967	chr2	3464931	3464932	ADI1	55256	58417	CGI	FALSE	TRUE	FALSE
cg08061755	chr11	9781826	9781827	LOC440028	440028	-745	CGI-S-Shore	TRUE	TRUE	FALSE
cg08080396	chr3	11102832	11102833	SLC6A1	6529	68411	CGI	FALSE	FALSE	TRUE
cg08092966	chr8	19009591	19009592	LOC100128993	100128993	93439	Non-CGI	FALSE	FALSE	TRUE
cg08097290	chr7	22472508	22472509	STEAP1B	256227	67391	Non-CGI	FALSE	TRUE	FALSE
cg08105396	chr1	153539058	153539059	S100A2	6273	-751	CGI-N-Shore	TRUE	FALSE	FALSE
cg08107308	chr2	240234604	240234605	MIR4269	100423043	7446	CGI	FALSE	TRUE	FALSE
cg08112313	chr19	44079105	44079106	XRCC1	7515	623	CGI-N-Shore	TRUE	TRUE	FALSE
cg08112740	chr19	19416944	19416945	SUGP1	57794	14375	Non-CGI	FALSE	TRUE	FALSE
cg08114533	chr11	67168528	67168529	TBC1D10C	374403	-2856	CGI	FALSE	TRUE	FALSE
cg08117110	chr15	81605232	81605233	STARD5	80765	11290	Non-CGI	FALSE	TRUE	FALSE
cg08121117	chr13	112575735	112575736	SOX1	6656	-146176	CGI	FALSE	FALSE	TRUE
cg08130175	chr1	20512143	20512144	UBXN10	127733	-433	CGI-N-Shore	TRUE	FALSE	FALSE
cg08132025	chr6	158497751	158497752	SERAC1	84947	91559	CGI	FALSE	TRUE	FALSE
cg08132711	chr4	15964743	15964744	FGFBP2	83888	114	Non-CGI	TRUE	FALSE	FALSE
cg08134671	chr19	2542837	2542838	GADD45B	4616	66713	CGI-S-Shore	FALSE	TRUE	FALSE
cg08158799	chr11	1010615	1010616	MUC6	4588	26089	CGI	FALSE	TRUE	FALSE
cg08159271	chr8	145009241	145009242	MIR661	724031	10204	CGI	FALSE	TRUE	FALSE
cg08159989	chr1	205326071	205326072	KLHDC8A	55220	93	Non-CGI	TRUE	TRUE	FALSE
cg08176140	chr19	1255392	1255393	MIDN	90007	6839	CGI	FALSE	TRUE	FALSE
cg08194979	chr14	62229171	62229172	SNAPC1	6617	95	CGI	TRUE	FALSE	FALSE
cg08198330	chr19	15483731	15483732	AKAP8	10270	6879	CGI	TRUE	TRUE	FALSE
cg08206657	chr10	14575436	14575437	FRMD4A	55691	-71292	Non-CGI	FALSE	TRUE	FALSE
cg08214990	chr16	971579	971580	LMF1	64788	59737	CGI	FALSE	TRUE	FALSE
cg08224159	chr6	151646312	151646313	ZBTB2	57621	66363	CGI-N-Shore	TRUE	TRUE	FALSE
cg08239282	chr2	106026162	106026163	FHL2	2274	29066	Non-CGI	FALSE	TRUE	FALSE
cg08239753	chr14	23769690	23769691	HOMEZ	57594	-942	CGI-N-Shore	TRUE	TRUE	FALSE
cg08244262	chr21	42797939	42797940	MX1	4599	5418	CGI-N-Shore	TRUE	TRUE	FALSE
cg08248579	chr6	17988937	17988938	KIF13A	63971	-1082	CGI	TRUE	FALSE	FALSE
cg08271031	chr22	44568812	44568813	PARVG	64098	-22	Non-CGI	TRUE	FALSE	FALSE
cg08273635	chr15	75091082	75091083	MIR4513	100616183	-9983	CGI-N-Shelf	TRUE	TRUE	FALSE
cg08273935	chr1	2518354	2518355	FAM213B	127281	454	CGI	TRUE	TRUE	FALSE
cg08322448	chr4	154147841	154147842	TRIM2	23321	73570	CGI-S-Shelf	FALSE	TRUE	FALSE
cg08325898	chr8	71096899	71096900	PRDM14	63978	-113336	Non-CGI	FALSE	TRUE	FALSE
cg08337876	chr15	65188788	65188789	ANKDD1A	348094	-15311	CGI-S-Shelf	FALSE	FALSE	TRUE
cg08344281	chr19	6042039	6042040	RANBP3	8498	-63718	CGI-S-Shore	FALSE	TRUE	FALSE
cg08354106	chr4	7961982	7961983	AFAP1	60312	-20328	CGI-N-Shelf	FALSE	FALSE	TRUE
cg08369780	chr19	35393314	35393315	ZNF30	90075	-24491	CGI-N-Shelf	FALSE	FALSE	TRUE
cg08370082	chr3	196616876	196616877	SENP5	205564	22148	Non-CGI	FALSE	TRUE	FALSE
cg08382332	chr2	58728740	58728741	FLJ30838	400955	-19146	Non-CGI	FALSE	FALSE	TRUE
cg08388041	chr11	17743761	17743762	MYOD1	4654	2650	CGI	FALSE	FALSE	TRUE
cg08400424	chr5	142357042	142357043	ARHGAP26	23092	206749	Non-CGI	FALSE	TRUE	FALSE
cg08410533	chr10	375830	375831	ZMYND11	10771	195424	CGI-S-Shore	FALSE	TRUE	FALSE
cg08418872	chr12	6442954	6442955	TNFRSF1A	7132	8327	Non-CGI	TRUE	TRUE	FALSE
cg08443635	chr7	100076621	100076622	TSC22D4	81628	279	CGI	TRUE	FALSE	FALSE
cg08448622	chr6	31026105	31026106	HCG22	285834	4120	Non-CGI	TRUE	TRUE	FALSE
cg08452802	chr7	123992223	123992224	TMEM229A	730130	-318699	Non-CGI	TRUE	TRUE	FALSE
cg08458637	chr1	231747906	231747907	LINC00582	100287814	-69	Non-CGI	TRUE	TRUE	FALSE
cg08470244	chr1	39917852	39917853	BMP8A	353500	-39464	Non-CGI	FALSE	TRUE	FALSE
cg08481873	chr2	241653301	241653302	AQP12A	375318	22038	CGI-N-Shore	FALSE	TRUE	FALSE
cg08494871	chr16	19862888	19862889	GPRC5B	51704	33942	Non-CGI	FALSE	TRUE	FALSE
cg08514957	chr19	14552135	14552136	PKN1	5585	7968	CGI	FALSE	TRUE	FALSE
cg08530859	chr8	143851287	143851288	LYNX1	66004	8351	Non-CGI	TRUE	TRUE	FALSE
cg08546229	chr10	71080735	71080736	HK1	3098	50978	CGI-S-Shore	FALSE	TRUE	FALSE
cg08548315	chr1	81609992	81609993	LPHN2	23266	-161851	Non-CGI	FALSE	FALSE	TRUE
cg08574915	chr17	79924772	79924773	NOTUM	147111	-5714	CGI	FALSE	FALSE	TRUE
cg08582840	chr17	932700	932701	MIR3183	100422835	-6900	CGI-N-Shore	FALSE	TRUE	FALSE
cg08594207	chr17	64825662	64825663	CACNG5	27091	-5571	Non-CGI	FALSE	FALSE	TRUE
cg08594681	chr8	27468684	27468685	CLU	1191	3642	CGI-N-Shelf	TRUE	TRUE	FALSE
cg08598287	chr10	43836083	43836084	FXYD4	53828	-31007	CGI-N-Shore	FALSE	FALSE	TRUE
cg08609517	chr1	6056522	6056523	NPHP4	261734	-3988	CGI-S-Shelf	FALSE	TRUE	FALSE
cg08622934	chr1	6054784	6054785	NPHP4	261734	-2250	CGI-S-Shore	FALSE	TRUE	FALSE
cg08638929	chr1	46640255	46640256	TSPAN1	10103	-492	Non-CGI	TRUE	TRUE	FALSE
cg08638960	chr6	168641710	168641711	DACT2	168002	78690	Non-CGI	FALSE	FALSE	TRUE
cg08641024	chr16	47047688	47047689	DNAJA2	10294	-40062	CGI-N-Shore	FALSE	FALSE	TRUE
cg08667275	chr11	119209304	119209305	RNF26	79102	4093	CGI-N-Shore	FALSE	FALSE	TRUE
cg08678429	chr20	40247988	40247989	CHD6	84181	-854	CGI-S-Shore	TRUE	FALSE	FALSE
cg08683012	chr11	78387252	78387253	NARS2	79731	-101342	CGI	TRUE	TRUE	FALSE
cg08684551	chr19	56652453	56652454	ZNF444	55311	-80	CGI	TRUE	FALSE	FALSE
cg08684991	chr12	11662075	11662076	LOC338817	338817	-38887	Non-CGI	FALSE	FALSE	TRUE
cg08692676	chr6	134299594	134299595	TBPL1	9519	26285	Non-CGI	FALSE	TRUE	FALSE
cg08701551	chr17	66287507	66287508	SLC16A6	9120	-101	CGI	TRUE	TRUE	FALSE
cg08715725	chr4	184922433	184922434	STOX2	56977	95923	CGI	FALSE	TRUE	FALSE
cg08731817	chr6	158443177	158443178	SYNJ2	8871	40288	Non-CGI	FALSE	TRUE	FALSE
cg08763422	chr4	1960364	1960365	SCARNA22	677770	-15997	CGI-S-Shelf	FALSE	TRUE	FALSE
cg08811336	chr10	3148096	3148097	PITRM1-AS1	100507034	-35695	CGI-S-Shore	TRUE	TRUE	FALSE
cg08811443	chr17	80819108	80819109	ZNF750	79755	-21176	CGI	FALSE	TRUE	FALSE
cg08813944	chr17	71258589	71258590	CPSF4L	642843	-569	Non-CGI	TRUE	FALSE	FALSE
cg08817867	chr17	19656554	19656555	ALDH3A1	218	-4807	Non-CGI	FALSE	FALSE	TRUE
cg08841511	chr10	86184581	86184582	CCSER2	54462	96170	Non-CGI	TRUE	TRUE	FALSE
cg08848003	chr3	98299487	98299488	CPOX	1371	12966	Non-CGI	FALSE	TRUE	FALSE
cg08853359	chr16	331454	331455	ARHGDIG	398	847	CGI-S-Shore	TRUE	TRUE	FALSE
cg08855249	chr1	207975363	207975364	MIR29C	407026	503	Non-CGI	TRUE	TRUE	FALSE
cg08857906	chr1	28156999	28157000	PPP1R8	5511	-251	CGI-N-Shore	TRUE	FALSE	FALSE
cg08862452	chr8	144903025	144903026	SCRIB	23513	-5475	CGI	FALSE	TRUE	FALSE
cg08893087	chr1	93416982	93416983	FAM69A	388650	10095	Non-CGI	FALSE	TRUE	FALSE
cg08908131	chr10	118706938	118706939	HSPA12A	259217	-97221	Non-CGI	FALSE	TRUE	FALSE
cg08918658	chr6	158447883	158447884	SYNJ2	8871	44994	CGI-N-Shore	TRUE	TRUE	FALSE
cg08948050	chr5	139943173	139943174	APBB3	10307	1014	CGI-N-Shore	TRUE	TRUE	FALSE
cg08948225	chr8	27288300	27288301	CHRNA2	1135	48511	Non-CGI	TRUE	TRUE	FALSE
cg08948442	chr1	26014468	26014469	MAN1C1	57134	70508	Non-CGI	FALSE	TRUE	FALSE
cg08973382	chr2	74728623	74728624	LBX2-AS1	151534	-1119	CGI-S-Shore	TRUE	TRUE	FALSE
cg09003509	chr12	130502003	130502004	LOC100190940	100190940	24882	CGI	FALSE	FALSE	TRUE
cg09038962	chr17	77899679	77899680	CBX4	8535	-86465	CGI-N-Shore	FALSE	FALSE	TRUE
cg09057080	chr16	837441	837442	RPUSD1	113000	940	CGI	TRUE	TRUE	FALSE
cg09068086	chr2	110970204	110970205	NPHP1	4867	-7564	CGI	FALSE	TRUE	FALSE
cg09073059	chr1	1490216	1490217	TMEM240	339453	-14475	CGI-S-Shore	FALSE	TRUE	FALSE
cg09095470	chr5	132944116	132944117	FSTL4	23105	4105	CGI-N-Shelf	FALSE	TRUE	FALSE
cg09121920	chr16	397672	397673	AXIN1	8312	5002	CGI-S-Shore	FALSE	TRUE	FALSE
cg09127448	chr10	126704108	126704109	MIR4296	100423041	17329	CGI	FALSE	TRUE	FALSE
cg09131339	chr1	109914235	109914236	SORT1	6272	26326	Non-CGI	FALSE	TRUE	FALSE
cg09139549	chr10	3151710	3151711	PITRM1-AS1	100507034	-32081	CGI	FALSE	TRUE	FALSE
cg09141303	chr4	103998291	103998292	SLC9B2	133308	146	CGI-S-Shore	TRUE	TRUE	FALSE
cg09158314	chr13	108922150	108922151	TNFSF13B	10673	172	Non-CGI	TRUE	FALSE	FALSE
cg09179916	chr5	38445834	38445835	MIR3650	100500824	111827	CGI-N-Shore	FALSE	TRUE	FALSE
cg09183124	chr1	173092323	173092324	TNFSF18	8995	-72219	Non-CGI	FALSE	FALSE	TRUE
cg09203501	chr7	5271545	5271546	WIPI2	26100	41709	CGI	FALSE	TRUE	FALSE
cg09233659	chr4	88832540	88832541	HSP90AB3P	3327	19544	Non-CGI	FALSE	FALSE	TRUE
cg09235983	chr11	58612814	58612815	GLYATL2	219970	-816	Non-CGI	TRUE	FALSE	FALSE
cg09261816	chr11	61530655	61530656	DKFZP434K028	26070	-5518	Non-CGI	FALSE	TRUE	FALSE
cg09262732	chr7	100285913	100285914	GIGYF1	64599	955	CGI-S-Shore	TRUE	FALSE	FALSE
cg09262882	chr19	34899586	34899587	PDCD2L	84306	4282	CGI-S-Shelf	FALSE	TRUE	FALSE
cg09267773	chr16	79802467	79802468	MAF	4094	-167844	CGI-N-Shore	FALSE	FALSE	TRUE
cg09274658	chr21	45726274	45726275	PFKL	5211	6348	CGI-N-Shelf	FALSE	TRUE	FALSE
cg09286367	chr7	5535692	5535693	MIR589	693174	-143	CGI	TRUE	TRUE	FALSE
cg09286493	chr11	78387387	78387388	NARS2	79731	-101477	CGI	TRUE	TRUE	FALSE
cg09304136	chr11	17905750	17905751	SERGEF	26297	128885	CGI	FALSE	TRUE	FALSE
cg09324735	chr11	1327106	1327107	TOLLIP	54472	3784	CGI	FALSE	TRUE	FALSE
cg09378425	chr7	150067896	150067897	REPIN1	29803	2534	CGI-S-Shore	TRUE	TRUE	FALSE
cg09410512	chr2	224564400	224564401	SCG2	7857	-97182	Non-CGI	FALSE	FALSE	TRUE
cg09417849	chr16	331892	331893	ARHGDIG	398	1285	CGI-S-Shore	TRUE	TRUE	FALSE
cg09420319	chr16	89387569	89387570	LOC100287036	100287036	27	CGI-S-Shore	TRUE	TRUE	FALSE
cg09445902	chr10	555545	555546	PRR26	414235	-140341	CGI	FALSE	TRUE	FALSE
cg09514933	chr2	242605566	242605567	DTYMK	1841	20815	CGI-N-Shore	FALSE	TRUE	FALSE
cg09527123	chr13	114806955	114806956	RASA3	22821	91138	CGI	FALSE	TRUE	FALSE
cg09579704	chr6	30166164	30166165	TRIM26	7726	15105	CGI-N-Shore	FALSE	TRUE	FALSE
cg09588020	chr1	27755803	27755804	GPR3	2827	36650	Non-CGI	FALSE	TRUE	FALSE
cg09588888	chr5	5303564	5303565	KIAA0947	23379	-119241	CGI-S-Shore	FALSE	TRUE	FALSE
cg09611576	chr13	25707495	25707496	PABPC3	5042	37218	Non-CGI	FALSE	FALSE	TRUE
cg09614626	chr21	22175001	22175002	LINC00320	387486	423	Non-CGI	FALSE	TRUE	FALSE
cg09654300	chr3	42132991	42132992	TRAK1	22906	244	Non-CGI	TRUE	FALSE	FALSE
cg09658183	chr17	18139506	18139507	LLGL1	3996	10569	Non-CGI	FALSE	TRUE	FALSE
cg09664550	chr10	33294358	33294359	ITGB1	3688	-47064	CGI-N-Shore	FALSE	FALSE	TRUE
cg09668627	chr1	1371844	1371845	VWA1	64856	940	CGI-S-Shore	FALSE	TRUE	FALSE
cg09677330	chr13	74487535	74487536	KLF12	11278	220857	Non-CGI	FALSE	TRUE	FALSE
cg09682051	chr11	128813008	128813009	TP53AIP1	63970	284	CGI	TRUE	FALSE	FALSE
cg09684079	chr10	134787625	134787626	NA	255352	-31535	CGI-N-Shore	FALSE	TRUE	FALSE
cg09706929	chr15	52118098	52118099	TMOD3	29766	-3725	CGI-N-Shelf	FALSE	FALSE	TRUE
cg09723776	chr8	126320143	126320144	TRIB1	10221	-122418	Non-CGI	FALSE	TRUE	FALSE
cg09729274	chr8	102550720	102550721	GRHL2	79977	46051	Non-CGI	FALSE	TRUE	FALSE
cg09733706	chr4	89648349	89648350	FAM13A-AS1	285512	17408	Non-CGI	FALSE	TRUE	FALSE
cg09750775	chr5	96211703	96211704	ERAP2	64167	58	Non-CGI	TRUE	TRUE	FALSE
cg09756373	chr1	156629764	156629765	NES	10763	17423	CGI-N-Shore	FALSE	FALSE	TRUE
cg09763373	chr16	596899	596900	MIR3176	100423037	3621	CGI	FALSE	TRUE	FALSE
cg09776772	chr7	2150534	2150535	MAD1L1	8379	122047	CGI	FALSE	TRUE	FALSE
cg09792612	chr21	45379489	45379490	TRAPPC10	7109	-52715	CGI-S-Shore	TRUE	TRUE	FALSE
cg09807875	chr7	34136112	34136113	BMPER	168667	191588	Non-CGI	FALSE	TRUE	FALSE
cg09811510	chr3	159590447	159590448	IL12A	3592	-116174	Non-CGI	FALSE	TRUE	FALSE
cg09831875	chr12	124907162	124907163	FAM101A	144347	133451	CGI-S-Shelf	FALSE	TRUE	FALSE
cg09847882	chr11	128812978	128812979	TP53AIP1	63970	314	CGI	TRUE	FALSE	FALSE
cg09855140	chr13	100004097	100004098	FKSG29	100131561	422	Non-CGI	TRUE	TRUE	FALSE
cg09861240	chr22	38038956	38038957	SH3BP1	23616	8294	CGI-S-Shelf	FALSE	TRUE	FALSE
cg09862193	chr5	67830153	67830154	PIK3R1	5295	318568	Non-CGI	FALSE	FALSE	TRUE
cg09906647	chr17	26939344	26939345	SGK494	124923	1865	Non-CGI	FALSE	TRUE	FALSE
cg09914648	chr8	142198807	142198808	DENND3	22898	60086	CGI	TRUE	TRUE	FALSE
cg09929930	chr7	150828583	150828584	GBX1	2636	36282	CGI	FALSE	TRUE	FALSE
cg09947844	chr16	4163819	4163820	ADCY9	115	2365	CGI	FALSE	TRUE	FALSE
cg09948958	chr14	94443055	94443056	ASB2	51676	19	Non-CGI	TRUE	FALSE	FALSE
cg09951320	chr11	123448238	123448239	GRAMD1B	57476	51709	CGI	FALSE	TRUE	FALSE
cg09966038	chr19	11287317	11287318	SPC24	147841	-20832	CGI-S-Shore	FALSE	TRUE	FALSE
cg09975715	chr17	8379050	8379051	NDEL1	81565	39870	CGI-N-Shore	FALSE	TRUE	FALSE
cg09979641	chr10	135021100	135021101	UTF1	8433	-22676	CGI	FALSE	TRUE	FALSE
cg09993780	chr6	31648544	31648545	LY6G5C	80741	3271	CGI-N-Shore	TRUE	TRUE	FALSE
cg10002888	chr6	31592974	31592975	SNORA38	677820	2117	CGI-S-Shelf	TRUE	TRUE	FALSE
cg10009968	chr7	3033408	3033409	CARD11	84433	50099	CGI	FALSE	TRUE	FALSE
cg10012595	chr1	25174504	25174505	CLIC4	25932	102743	CGI-N-Shore	FALSE	FALSE	TRUE
cg10024501	chr6	43663647	43663648	MRPS18A	55168	-8097	Non-CGI	FALSE	FALSE	TRUE
cg10036892	chr2	28567655	28567656	LOC100505716	100505716	-34328	CGI	FALSE	FALSE	TRUE
cg10040541	chr8	19520584	19520585	CSGALNACT1	55790	94796	Non-CGI	FALSE	TRUE	FALSE
cg10045321	chr10	126331212	126331213	FAM53B	9679	147693	CGI-N-Shore	FALSE	TRUE	FALSE
cg10045864	chr2	240036897	240036898	MIR4441	100616493	-29274	CGI	FALSE	TRUE	FALSE
cg10077985	chr10	833127	833128	DIP2C	22982	-97518	CGI	FALSE	FALSE	TRUE
cg10078335	chr2	241535845	241535846	GPR35	2859	-8978	CGI	FALSE	TRUE	FALSE
cg10082088	chr12	124856376	124856377	FAM101A	144347	82665	CGI-S-Shore	FALSE	TRUE	FALSE
cg10086966	chr2	120514413	120514414	PTPN4	5775	-2792	CGI-N-Shelf	FALSE	FALSE	TRUE
cg10093358	chr10	636390	636391	PRR26	414235	-59496	CGI-S-Shelf	FALSE	TRUE	FALSE
cg10097313	chr14	25591076	25591077	STXBP6	29091	-71904	Non-CGI	FALSE	FALSE	TRUE
cg10125465	chr1	10169029	10169030	UBE4B	10277	75987	Non-CGI	FALSE	TRUE	FALSE
cg10128511	chr3	98452940	98452941	ST3GAL6	10402	1787	CGI	FALSE	TRUE	FALSE
cg10130374	chr13	111935412	111935413	TEX29	121793	-37601	CGI	TRUE	TRUE	FALSE
cg10139037	chr17	46136875	46136876	NFE2L1	4779	11188	CGI	FALSE	TRUE	FALSE
cg10158717	chr12	133380471	133380472	GOLGA3	2802	24953	CGI	FALSE	TRUE	FALSE
cg10168009	chr12	120108699	120108700	PRKAB1	5564	2941	CGI-S-Shelf	FALSE	TRUE	FALSE
cg10168494	chr3	187635183	187635184	BCL6	604	-171669	Non-CGI	FALSE	FALSE	TRUE
cg10208609	chr1	90331229	90331230	LRRC8D	55144	44655	Non-CGI	FALSE	TRUE	FALSE
cg10221746	chr1	156629412	156629413	BCAN	63827	17671	CGI-S-Shore	FALSE	FALSE	TRUE
cg10256790	chr3	133618896	133618897	RAB6B	51560	-4204	CGI-S-Shelf	FALSE	FALSE	TRUE
cg10280007	chr10	123313831	123313832	FGFR2	2263	44139	Non-CGI	FALSE	TRUE	FALSE
cg10299941	chr8	145009137	145009138	MIR661	724031	10308	CGI	FALSE	TRUE	FALSE
cg10307345	chr11	18771567	18771568	IGSF22	283284	-23789	Non-CGI	FALSE	TRUE	FALSE
cg10324158	chr3	45067713	45067714	CLEC3B	7123	-44	Non-CGI	TRUE	FALSE	FALSE
cg10325659	chr14	94423950	94423951	ASB2	51676	19124	Non-CGI	TRUE	TRUE	FALSE
cg10338518	chr4	87895137	87895138	AFF1	4299	38982	Non-CGI	FALSE	TRUE	FALSE
cg10341513	chr22	51041242	51041243	MAPK8IP2	23542	2110	CGI-S-Shore	TRUE	TRUE	FALSE
cg10345404	chr8	27187123	27187124	PTK2B	2185	18123	CGI-S-Shelf	FALSE	TRUE	FALSE
cg10351829	chr10	134661550	134661551	NKX6-2	84504	-62012	CGI	FALSE	TRUE	FALSE
cg10364115	chr7	2560976	2560977	MIR4648	100616116	-5730	CGI-S-Shore	FALSE	TRUE	FALSE
cg10366439	chr2	110970249	110970250	NPHP1	4867	-7609	CGI	FALSE	TRUE	FALSE
cg10369888	chr17	46138081	46138082	NFE2L1	4779	12394	CGI-S-Shore	FALSE	TRUE	FALSE
cg10378521	chr12	133101612	133101613	FBRSL1	57666	34454	CGI	FALSE	TRUE	FALSE
cg10395252	chr14	76236901	76236902	TTLL5	23093	109349	Non-CGI	FALSE	TRUE	FALSE
cg10407598	chr17	73629365	73629366	SMIM5	643008	-147	CGI-S-Shore	TRUE	TRUE	FALSE
cg10435967	chr1	1249102	1249103	ACAP3	116983	-4112	CGI	FALSE	TRUE	FALSE
cg10450175	chr16	88689712	88689713	IL17C	27189	-15287	CGI	FALSE	TRUE	FALSE
cg10471216	chr12	57591104	57591105	MIR1228	100302201	2816	CGI	FALSE	TRUE	FALSE
cg10485881	chr16	89712703	89712704	CHMP1A	5119	11424	CGI-N-Shore	FALSE	TRUE	FALSE
cg10490577	chr13	30009956	30009957	SLC7A1	6541	159867	Non-CGI	FALSE	TRUE	FALSE
cg10493356	chr22	31608270	31608271	LIMK2	3985	19	CGI	TRUE	FALSE	FALSE
cg10501210	chr1	207997020	207997021	LOC148696	148696	5295	CGI-N-Shore	TRUE	FALSE	FALSE
cg10505257	chr16	4731639	4731640	NUDT16L1	84309	-12053	CGI	FALSE	TRUE	FALSE
cg10521431	chr10	104814810	104814811	CNNM2	54805	136734	Non-CGI	FALSE	TRUE	FALSE
cg10527300	chr13	110874326	110874327	COL4A1	1282	85168	Non-CGI	FALSE	TRUE	FALSE
cg10541466	chr1	113425263	113425264	AKR7A2P1	246182	-40707	Non-CGI	FALSE	FALSE	TRUE
cg10542446	chr17	26939298	26939299	SGK494	124923	1911	Non-CGI	FALSE	TRUE	FALSE
cg10581071	chr5	10653304	10653305	ANKRD33B	651746	88868	CGI-S-Shelf	FALSE	TRUE	FALSE
cg10592478	chr12	53612641	53612642	ITGB7	3695	-11640	CGI	FALSE	TRUE	FALSE
cg10621552	chr6	158464770	158464771	SYNJ2	8871	61881	CGI	FALSE	TRUE	FALSE
cg10626718	chr8	67687371	67687372	PTTG3P	26255	-7130	CGI	TRUE	TRUE	FALSE
cg10638604	chr15	58430539	58430540	AQP9	366	143	Non-CGI	TRUE	TRUE	FALSE
cg10661163	chr7	116592959	116592960	ST7	7982	-420	CGI-N-Shore	TRUE	FALSE	FALSE
cg10688799	chr13	45481164	45481165	NUFIP1	26747	82447	Non-CGI	FALSE	FALSE	TRUE
cg10689175	chr6	34625341	34625342	C6orf106	64771	39282	Non-CGI	FALSE	TRUE	FALSE
cg10706293	chr17	20920717	20920718	USP22	23326	26354	Non-CGI	FALSE	TRUE	FALSE
cg10732611	chr13	33700592	33700593	KL	9365	110390	CGI-N-Shelf	FALSE	TRUE	FALSE
cg10772185	chr10	34320548	34320549	LINC00838	100505583	-258939	Non-CGI	FALSE	FALSE	TRUE
cg10785666	chr10	4868512	4868513	AKR1E2	83592	109	CGI	TRUE	FALSE	FALSE
cg10796749	chr1	10056837	10056838	RBP7	116362	-416	CGI-N-Shore	TRUE	FALSE	FALSE
cg10805676	chr16	421990	421991	MRPL28	10573	-1420	CGI-S-Shore	TRUE	TRUE	FALSE
cg10819847	chr19	16435375	16435376	KLF2	10365	-274	CGI	TRUE	FALSE	FALSE
cg10824259	chr6	11252262	11252263	NEDD9	4739	130317	Non-CGI	FALSE	TRUE	FALSE
[truncated: 1,416 more rows]
