# Supplementary material for: H3K4me1 marks DNA regions hypomethylated during aging in human stem and differentiated cells
Source: HighWire-hosted journal article supplement (doi:10.1101/gr.169011.113), 2014-09-30
Supplement: Supplemental_Table_6.xlsx [file Supplemental_Table_6.xlsx]

## Sheet: ST6
Supplemental Table 6: List of common CpG sites hypomethylated in MSCs, blood, neuron and glia, during aging
Target ID	geneId	geneSymbol	Chromosome	start	end	hmm.cpgi	prom.reg	intra.reg	inter.reg	avg_m_young	avg_m_old	avg_beta_young	avg_beta_old
cg00595472	26070	DKFZP434K028	chr11	61525251	61525252	Non-CGI	TRUE	TRUE	FALSE	3.62996	2.83487	0.923756	0.868985
cg00595472	745	MYRF	chr11	61525251	61525252	Non-CGI	TRUE	TRUE	FALSE	3.62996	2.83487	0.923756	0.868985
cg01014224	NA	NA	chr13	44379186	44379187	Non-CGI	FALSE	FALSE	TRUE	1.29693	-0.590328	0.705895	0.406663
cg01425188	NA	NA	chr8	28479277	28479278	CGI-N-Shore	FALSE	FALSE	TRUE	0.997974	-0.351991	0.657731	0.438791
cg01612936	11190	CEP250	chr20	34051662	34051663	Non-CGI	FALSE	TRUE	FALSE	1.29117	0.0209895	0.706838	0.503252
cg01816748	5159	PDGFRB	chr5	149512117	149512118	CGI-S-Shelf	FALSE	TRUE	FALSE	-0.381368	-1.38393	0.435832	0.27901
cg02347984	3017	HIST1H2BD	chr6	26170601	26170602	CGI-N-Shore	FALSE	TRUE	FALSE	2.07973	0.178005	0.802516	0.530131
cg02753187	10241	CALCOCO2	chr17	46919180	46919181	Non-CGI	FALSE	TRUE	FALSE	0.449579	-0.507135	0.571404	0.413853
cg03363142	100505718	LOC100505718	chr8	69942947	69942948	Non-CGI	FALSE	TRUE	FALSE	1.00032	-0.999614	0.655242	0.345543
cg03512414	54453	RIN2	chr20	19915874	19915875	Non-CGI	FALSE	TRUE	FALSE	4.25852	2.11902	0.947791	0.767093
cg04914930	NA	NA	chr13	44785481	44785482	Non-CGI	FALSE	FALSE	TRUE	3.0127	2.06717	0.88745	0.800794
cg05135288	197335	WDR90	chr16	717707	717708	CGI-N-Shore	TRUE	TRUE	FALSE	1.12393	-0.0821175	0.683344	0.485938
cg05135288	89941	RHOT2	chr16	717707	717708	CGI-N-Shore	TRUE	TRUE	FALSE	1.12393	-0.0821175	0.683344	0.485938
cg06033789	NA	NA	chr8	105899330	105899331	Non-CGI	FALSE	FALSE	TRUE	0.0813058	-0.621202	0.51404	0.397594
cg06479142	NA	NA	chr3	71636085	71636086	CGI-S-Shelf	FALSE	FALSE	TRUE	0.0694408	-0.695217	0.51209	0.387159
cg06703803	51434	ANAPC7	chr12	110811045	110811046	Non-CGI	FALSE	TRUE	FALSE	2.49936	1.28586	0.84667	0.70566
cg06706159	23031	MAST3	chr19	18260350	18260351	CGI	FALSE	TRUE	FALSE	4.88369	3.01613	0.966377	0.874784
cg07216436	NA	NA	chr3	154951034	154951035	Non-CGI	FALSE	FALSE	TRUE	2.37147	-1.30224	0.831612	0.304451
cg07305719	22891	ZNF365	chr10	64133406	64133407	CGI-N-Shore	TRUE	TRUE	FALSE	3.59143	1.92754	0.918909	0.7798
cg07807210	4155	MBP	chr18	74770431	74770432	CGI	FALSE	TRUE	FALSE	0.974567	-1.67502	0.652624	0.263999
cg08159989	55220	KLHDC8A	chr1	205326071	205326072	Non-CGI	TRUE	TRUE	FALSE	1.92652	-0.184933	0.783247	0.467985
cg09261816	745	MYRF	chr11	61530655	61530656	Non-CGI	FALSE	TRUE	FALSE	0.261585	-0.811805	0.545272	0.368729
cg09286367	693174	MIR589	chr7	5535692	5535693	CGI	TRUE	TRUE	FALSE	2.06238	1.40819	0.802048	0.718644
cg09286367	80028	FBXL18	chr7	5535692	5535693	CGI	TRUE	TRUE	FALSE	2.06238	1.40819	0.802048	0.718644
cg10280007	2263	FGFR2	chr10	123313831	123313832	Non-CGI	FALSE	TRUE	FALSE	3.53881	2.42902	0.913394	0.836037
cg10501210	NA	NA	chr1	207997020	207997021	CGI-N-Shore	TRUE	FALSE	FALSE	2.75166	0.842763	0.82714	0.625404
cg11145461	1465	CSRP1	chr1	201475451	201475452	CGI-N-Shore	FALSE	TRUE	FALSE	-0.493009	-2.01663	0.421849	0.200745
cg11230112	8871	SYNJ2	chr6	158460979	158460980	CGI-N-Shelf	FALSE	TRUE	FALSE	1.50312	-0.632797	0.726486	0.403784
cg12611488	6497	SKI	chr1	2169282	2169283	CGI-N-Shore	FALSE	TRUE	FALSE	-1.04245	-2.00329	0.334401	0.204533
cg13243168	6603	SMARCD2	chr17	61915833	61915834	CGI-N-Shelf	FALSE	TRUE	FALSE	0.231031	-0.455002	0.539374	0.422418
cg14069287	23022	PALLD	chr4	169631613	169631614	Non-CGI	FALSE	TRUE	FALSE	1.97469	0.739765	0.794316	0.619996
cg15227610	100528019	HSPB2-C11orf52	chr11	111782016	111782017	CGI-N-Shore	TRUE	TRUE	FALSE	3.57422	2.57326	0.918177	0.84647
cg15227610	1410	CRYAB	chr11	111782016	111782017	CGI-N-Shore	TRUE	TRUE	FALSE	3.57422	2.57326	0.918177	0.84647
cg15227610	3316	HSPB2	chr11	111782016	111782017	CGI-N-Shore	TRUE	TRUE	FALSE	3.57422	2.57326	0.918177	0.84647
cg15370536	7067	THRA	chr17	38232128	38232129	Non-CGI	FALSE	TRUE	FALSE	-1.28353	-2.1348	0.296137	0.188052
cg15393490	NA	NA	chr1	207996459	207996460	CGI-N-Shore	TRUE	FALSE	FALSE	2.83079	1.49975	0.86698	0.732886
cg18631798	8310	ACOX3	chr4	8396163	8396164	CGI	FALSE	TRUE	FALSE	2.30521	-0.60702	0.816129	0.407196
cg20669641	9644	SH3PXD2A	chr10	105428818	105428819	CGI-S-Shore	TRUE	TRUE	FALSE	-1.47193	-2.15411	0.266853	0.186526
cg20677267	23328	SASH1	chr6	148834863	148834864	Non-CGI	FALSE	TRUE	FALSE	-0.378733	-1.28168	0.435897	0.298566
cg21052766	89797	NAV2	chr11	20134289	20134290	Non-CGI	FALSE	TRUE	FALSE	-1.28746	-2.16311	0.297269	0.183503
cg23728447	9679	FAM53B	chr10	126429267	126429268	CGI-N-Shelf	FALSE	TRUE	FALSE	1.30667	-1.02103	0.702963	0.343579
cg24028809	26575	RGS17	chr6	153414101	153414102	Non-CGI	FALSE	TRUE	FALSE	-1.52052	-2.1659	0.265084	0.183461
cg24137511	23031	MAST3	chr19	18260330	18260331	CGI	FALSE	TRUE	FALSE	4.63044	3.3858	0.960644	0.899688
cg24394819	57521	RPTOR	chr17	78725049	78725050	CGI	FALSE	TRUE	FALSE	2.81261	1.68882	0.874041	0.744289
cg25677261	5046	PCSK6	chr15	102009856	102009857	CGI	FALSE	TRUE	FALSE	3.46471	1.24852	0.912929	0.688266
cg26479868	83857	TMTC1	chr12	29916194	29916195	Non-CGI	FALSE	TRUE	FALSE	-0.520052	-1.1664	0.414726	0.311188
cg26781524	53630	BCMO1	chr16	81272080	81272081	Non-CGI	TRUE	FALSE	FALSE	-1.76025	-2.37805	0.230457	0.163408
