# Supplementary material for: H3K4me1 marks DNA regions hypomethylated during aging in human stem and differentiated cells
Source: HighWire-hosted journal article supplement (doi:10.1101/gr.169011.113), 2014-09-30
Supplement: Supplemental_Table_7.xlsx [file Supplemental_Table_7.xlsx]

## Sheet: ST7
Supplemental Table 7: List of common CpG sites hypermethylated in MSCs, blood, neuron and glia, during aging
Target ID	geneId	geneSymbol	Chromosome	start	end	hmm.cpgi	prom.reg	intra.reg	inter.reg	avg_m_young	avg_m_old	avg_beta_young	avg_beta_old
cg00962755	23612	PHLDA3	chr1	201439001	201439002	CGI	TRUE	FALSE	FALSE	1.22115	2.35192	0.696458	0.819087
cg01329687	8303	SNN	chr16	11761803	11761804	CGI	TRUE	FALSE	FALSE	-1.47632	-0.663364	0.269785	0.394286
cg03555227	64901	RANBP17	chr5	170289070	170289071	CGI	FALSE	TRUE	FALSE	-1.23509	-0.159763	0.302882	0.473262
cg04094193	91746	YTHDC1	chr4	69216103	69216104	CGI-S-Shore	TRUE	FALSE	FALSE	1.03328	1.89003	0.667672	0.780545
cg04514047	651746	ANKRD33B	chr5	10562456	10562457	CGI-N-Shore	TRUE	FALSE	FALSE	1.94161	3.32034	0.787836	0.897073
cg04684267	10782	ZNF274	chr19	58694502	58694503	CGI	TRUE	FALSE	FALSE	-2.53414	-1.46279	0.15019	0.27919
cg04787211	64601	VPS16	chr20	2820954	2820955	CGI	TRUE	TRUE	FALSE	-2.82489	-2.19017	0.12605	0.193442
cg04787211	64773	PCED1A	chr20	2820954	2820955	CGI	TRUE	TRUE	FALSE	-2.82489	-2.19017	0.12605	0.193442
cg06570224	NA	NA	chr3	157812475	157812476	CGI	FALSE	FALSE	TRUE	1.03849	1.8063	0.663	0.760479
cg06639320	2274	FHL2	chr2	106015739	106015740	CGI	TRUE	TRUE	FALSE	-0.90632	0.500675	0.351198	0.583688
cg06648759	NA	NA	chr13	40892751	40892752	Non-CGI	FALSE	FALSE	TRUE	1.79867	2.68067	0.773898	0.856391
cg07066898	23025	UNC13A	chr19	17717094	17717095	CGI	FALSE	TRUE	FALSE	-0.849566	0.156287	0.358557	0.524907
cg07544187	148113	CILP2	chr19	19651235	19651236	CGI	FALSE	TRUE	FALSE	-3.25712	-1.67345	0.0969332	0.259669
cg07553761	286827	TRIM59	chr3	160167977	160167978	CGI	TRUE	FALSE	FALSE	-2.50032	-1.53223	0.155368	0.265805
cg07553761	57560	IFT80	chr3	160167977	160167978	CGI	TRUE	FALSE	FALSE	-2.50032	-1.53223	0.155368	0.265805
cg08144172	NA	NA	chr1	41849203	41849204	CGI	FALSE	FALSE	TRUE	-2.25811	-1.31243	0.175286	0.305119
cg09547119	84765	ZNF577	chr19	52391367	52391368	CGI	TRUE	TRUE	FALSE	-2.07327	-1.31295	0.197329	0.298639
cg09864185	6492	SIM1	chr6	100914639	100914640	CGI	TRUE	FALSE	FALSE	-0.821067	0.168695	0.365968	0.522378
cg10625705	6666	SOX12	chr20	307320	307321	CGI	TRUE	FALSE	FALSE	-2.12714	-1.4586	0.188082	0.275394
cg12141030	56992	KIF15	chr3	44803447	44803448	CGI	TRUE	TRUE	FALSE	-1.51891	0.207203	0.260977	0.535099
cg12141030	57456	KIAA1143	chr3	44803447	44803448	CGI	TRUE	TRUE	FALSE	-1.51891	0.207203	0.260977	0.535099
cg14507337	4990	SIX6	chr14	60978161	60978162	CGI	FALSE	TRUE	FALSE	-0.697134	0.952957	0.390574	0.636203
cg14531663	80863	PRRT1	chr6	32116933	32116934	CGI	FALSE	TRUE	FALSE	-1.39426	0.603923	0.290112	0.588577
cg14757228	80863	PRRT1	chr6	32116858	32116859	CGI	FALSE	TRUE	FALSE	-1.13751	1.22684	0.321877	0.66904
cg15341124	100302145	MIR1247	chr14	102027734	102027735	CGI	TRUE	FALSE	FALSE	-1.54014	-0.697247	0.259413	0.387989
cg15341124	1735	DIO3	chr14	102027734	102027735	CGI	TRUE	FALSE	FALSE	-1.54014	-0.697247	0.259413	0.387989
cg16842214	131377	KLHL40	chr3	42727160	42727161	CGI-N-Shore	TRUE	FALSE	FALSE	-0.238914	0.855089	0.460208	0.62508
cg16867657	100506409	ELOVL2-AS1	chr6	11044877	11044878	CGI	TRUE	TRUE	FALSE	-0.844929	1.1104	0.363459	0.671514
cg16867657	54898	ELOVL2	chr6	11044877	11044878	CGI	TRUE	TRUE	FALSE	-0.844929	1.1104	0.363459	0.671514
cg17243289	4087	SMAD2	chr18	45458021	45458022	CGI	TRUE	FALSE	FALSE	-0.122388	0.683205	0.479808	0.613865
cg17955729	80863	PRRT1	chr6	32117088	32117089	CGI	FALSE	TRUE	FALSE	-0.310247	0.98411	0.448229	0.648741
cg19192280	80863	PRRT1	chr6	32116893	32116894	CGI	FALSE	TRUE	FALSE	-1.40527	0.0858591	0.279971	0.509375
cg21097354	100133311	HOXA-AS3	chr7	27179161	27179162	CGI	TRUE	FALSE	FALSE	1.863	2.93685	0.768744	0.871322
cg21572722	100506409	ELOVL2-AS1	chr6	11044894	11044895	CGI	TRUE	TRUE	FALSE	-1.17101	0.689241	0.309068	0.609828
cg21572722	54898	ELOVL2	chr6	11044894	11044895	CGI	TRUE	TRUE	FALSE	-1.17101	0.689241	0.309068	0.609828
cg22454769	2274	FHL2	chr2	106015767	106015768	CGI	TRUE	TRUE	FALSE	-0.600204	0.618082	0.400149	0.602649
cg22897615	80863	PRRT1	chr6	32117079	32117080	CGI	FALSE	TRUE	FALSE	-1.37816	0.43982	0.284167	0.566055
cg23193759	219738	C10orf35	chr10	71389896	71389897	CGI-N-Shore	TRUE	FALSE	FALSE	-1.19004	-0.260825	0.305693	0.457711
cg23221603	NA	NA	chr2	26963883	26963884	Non-CGI	FALSE	FALSE	TRUE	-0.575927	0.258976	0.406095	0.540477
cg24724428	100506409	ELOVL2-AS1	chr6	11044888	11044889	CGI	TRUE	TRUE	FALSE	-2.55338	-0.714766	0.14737	0.384429
cg24724428	54898	ELOVL2	chr6	11044888	11044889	CGI	TRUE	TRUE	FALSE	-2.55338	-0.714766	0.14737	0.384429
cg26682407	23263	MCF2L	chr13	113660246	113660247	CGI-S-Shore	FALSE	TRUE	FALSE	-1.50467	0.812529	0.264552	0.633854
cg27067781	80863	PRRT1	chr6	32116853	32116854	CGI	FALSE	TRUE	FALSE	-0.534124	1.26304	0.413765	0.685729
cg27345757	4638	MYLK	chr3	123602795	123602796	CGI	FALSE	TRUE	FALSE	-2.31275	-1.59728	0.16899	0.258143
cg27541691	27175	TUBG2	chr17	40811050	40811051	CGI-N-Shore	TRUE	FALSE	FALSE	0.509064	1.35345	0.579522	0.706274
