# Supplementary material for: H3K4me1 marks DNA regions hypomethylated during aging in human stem and differentiated cells
Source: HighWire-hosted journal article supplement (doi:10.1101/gr.169011.113), 2014-09-30
Supplement: Supplemental_Table_8.xlsx [file Supplemental_Table_8.xlsx]

## Sheet: ST8
Supplemental Table 8: List of convergent CpG sites identified in MSCs during aging
Target ID	Chromosome	start	end	nearest.gene	nearest.gene.id	disttotss	hmm.cpgi	prom.reg	intra.reg	inter.reg
cg00318766	chr1	68962907	68962908	DEPDC1	55635	-107	CGI	TRUE	TRUE	FALSE
cg00325919	chr1	156595847	156595848	HAPLN2	60484	6760	CGI-S-Shore	FALSE	FALSE	TRUE
cg00530939	chr1	51425360	51425361	FAF1	11124	574	CGI	FALSE	TRUE	FALSE
cg00813378	chr1	1475209	1475210	TMEM240	339453	529	CGI	FALSE	TRUE	FALSE
cg01782790	chr1	163393050	163393051	NUF2	83540	101326	CGI-S-Shore	FALSE	FALSE	TRUE
cg03048314	chr1	19970337	19970338	NBL1	4681	613	CGI	TRUE	TRUE	FALSE
cg03736085	chr1	31191003	31191004	MATN1-AS1	100129196	-614	CGI-N-Shore	TRUE	TRUE	FALSE
cg04205107	chr1	242688320	242688321	PLD5	200150	-321	CGI	TRUE	FALSE	FALSE
cg04273303	chr1	228225533	228225534	WNT3A	89780	30809	CGI	FALSE	TRUE	FALSE
cg04347356	chr1	47779307	47779308	STIL	6491	510	CGI-N-Shore	TRUE	TRUE	FALSE
cg04867733	chr1	77747987	77747988	AK5	26289	324	CGI	TRUE	FALSE	FALSE
cg04927502	chr1	149889361	149889362	SV2A	9900	71	Non-CGI	TRUE	FALSE	FALSE
cg06419268	chr1	206879950	206879951	MAPKAPK2	9261	21584	Non-CGI	FALSE	TRUE	FALSE
cg06633637	chr1	109643190	109643191	SCARNA2	677766	374	CGI	TRUE	FALSE	FALSE
cg06882340	chr1	16475233	16475234	EPHA2	1969	7347	CGI	FALSE	TRUE	FALSE
cg07091016	chr1	36174005	36174006	C1orf216	127703	10783	CGI-S-Shore	FALSE	FALSE	TRUE
cg07566080	chr1	57889475	57889476	C8B	732	-457786	CGI	TRUE	TRUE	FALSE
cg07956264	chr1	27226760	27226761	GPATCH3	63906	200	CGI	TRUE	TRUE	FALSE
cg08914730	chr1	226297409	226297410	H3F3AP4	440926	45730	CGI	FALSE	FALSE	TRUE
cg09138445	chr1	202896480	202896481	KLHL12	59349	1245	CGI	TRUE	TRUE	FALSE
cg09313917	chr1	57111387	57111388	PRKAA2	5563	396	CGI	FALSE	TRUE	FALSE
cg09854088	chr1	202183279	202183280	LGR6	59352	20160	CGI	TRUE	TRUE	FALSE
cg10203375	chr1	211307178	211307179	KCNH1	3756	277	CGI	FALSE	TRUE	FALSE
cg10626236	chr1	1631100	1631101	MMP23A	8511	-276	CGI	TRUE	TRUE	FALSE
cg10706230	chr1	25944514	25944515	MAN1C1	57134	554	CGI	TRUE	FALSE	FALSE
cg11336294	chr1	197115979	197115980	ASPM	259266	-154	CGI	TRUE	FALSE	FALSE
cg11412129	chr1	88928839	88928840	PKN2	5586	-221081	CGI-S-Shore	FALSE	FALSE	TRUE
cg11424597	chr1	44820726	44820727	ERI3	79033	211	CGI	TRUE	FALSE	FALSE
cg11574055	chr1	117077116	117077117	CD58	965	36597	CGI	FALSE	TRUE	FALSE
cg11856897	chr1	47998999	47999000	FOXD2	2306	97309	CGI	FALSE	FALSE	TRUE
cg12302527	chr1	3461381	3461382	MIR551A	693135	15971	CGI-S-Shore	FALSE	TRUE	FALSE
cg12768681	chr1	20879547	20879548	FAM43B	163933	614	CGI	TRUE	FALSE	FALSE
cg13060157	chr1	113286610	113286611	FAM19A3	284467	23420	CGI	FALSE	FALSE	TRUE
cg13392141	chr1	77748391	77748392	AK5	26289	728	CGI	TRUE	TRUE	FALSE
cg13904493	chr1	233464194	233464195	KIAA1804	84451	679	CGI	TRUE	FALSE	FALSE
cg14018153	chr1	3098864	3098865	MIR4251	100422968	54324	CGI-S-Shore	FALSE	TRUE	FALSE
cg14285937	chr1	8398735	8398736	SLC45A1	50651	14344	CGI	FALSE	TRUE	FALSE
cg15104644	chr1	231297103	231297104	TRIM67	440730	-1569	CGI	TRUE	FALSE	FALSE
cg15211499	chr1	7765369	7765370	VAMP3	9341	-65958	CGI	FALSE	TRUE	FALSE
cg16007456	chr1	101004638	101004639	GPR88	54112	909	CGI	TRUE	TRUE	FALSE
cg16534233	chr1	42846477	42846478	RIMKLA	284716	8	CGI	TRUE	FALSE	FALSE
cg16650717	chr1	19970334	19970335	NBL1	4681	610	CGI	TRUE	TRUE	FALSE
cg16824301	chr1	182573155	182573156	RGS16	6004	391	CGI-N-Shore	FALSE	TRUE	FALSE
cg17042098	chr1	61519631	61519632	NFIA	4774	-23313	CGI	FALSE	FALSE	TRUE
cg17491850	chr1	57888480	57888481	C8B	732	-456791	CGI	FALSE	TRUE	FALSE
cg18879590	chr1	236306640	236306641	GPR137B	7107	807	CGI	FALSE	TRUE	FALSE
cg18975416	chr1	25349562	25349563	RUNX3	864	-57949	Non-CGI	FALSE	FALSE	TRUE
cg19092396	chr1	1143751	1143752	TNFRSF18	8784	-1661	CGI	TRUE	FALSE	FALSE
cg19249107	chr1	55505954	55505955	PCSK9	255738	804	CGI	TRUE	TRUE	FALSE
cg19282714	chr1	17445929	17445930	PADI2	11240	17	CGI	TRUE	FALSE	FALSE
cg19762508	chr1	5931428	5931429	MIR4689	100616421	-8626	CGI-N-Shore	FALSE	TRUE	FALSE
cg20706316	chr1	8398600	8398601	SLC45A1	50651	14209	CGI-N-Shore	FALSE	TRUE	FALSE
cg22456975	chr1	174969442	174969443	CACYBP	27101	870	CGI	FALSE	TRUE	FALSE
cg22524657	chr1	47999163	47999164	FOXD2	2306	97473	CGI	FALSE	FALSE	TRUE
cg22603815	chr1	155145180	155145181	TRIM46	80128	-239	CGI-N-Shore	TRUE	TRUE	FALSE
cg22797031	chr1	170630070	170630071	PRRX1	5396	-3241	CGI	FALSE	FALSE	TRUE
cg22822919	chr1	10270658	10270659	KIF1B	23095	-104	CGI	TRUE	FALSE	FALSE
cg23029526	chr1	21616984	21616985	LOC100506801	100506801	-2797	CGI	TRUE	TRUE	FALSE
cg23508540	chr1	9884032	9884033	CLSTN1	22883	516	CGI	TRUE	FALSE	FALSE
cg24058805	chr1	66777579	66777580	SGIP1	84251	-222244	Non-CGI	FALSE	TRUE	FALSE
cg24864511	chr1	6480516	6480517	HES2	54626	4212	CGI	TRUE	TRUE	FALSE
cg26115816	chr1	109633373	109633374	TMEM167B	56900	-28	CGI	TRUE	FALSE	FALSE
cg26224305	chr1	934197	934198	HES4	57801	1353	CGI	FALSE	FALSE	TRUE
cg26246897	chr1	59612710	59612711	HSD52	729467	-230	CGI	TRUE	FALSE	FALSE
cg26332740	chr1	228196227	228196228	WNT3A	89780	1503	CGI	FALSE	TRUE	FALSE
cg27105205	chr1	154934396	154934397	PYGO2	90780	-137	CGI	TRUE	FALSE	FALSE
cg27301885	chr1	198125392	198125393	NEK7	140609	-714	CGI-N-Shore	TRUE	FALSE	FALSE
cg00020622	chr2	144694680	144694681	GTDC1	79712	395401	CGI	FALSE	FALSE	TRUE
cg00071565	chr2	10588493	10588494	ODC1	4953	-39	CGI	TRUE	FALSE	FALSE
cg00428160	chr2	236417265	236417266	AGAP1	116987	14531	CGI	FALSE	TRUE	FALSE
cg00800569	chr2	239229395	239229396	TRAF3IP1	26146	209	CGI	TRUE	FALSE	FALSE
cg03381035	chr2	65283437	65283438	CEP68	23177	-56	CGI	TRUE	FALSE	FALSE
cg03532030	chr2	242824433	242824434	CXXC11	285093	12546	CGI-S-Shore	FALSE	FALSE	TRUE
cg04255268	chr2	220387374	220387375	ASIC4	55515	8481	CGI	FALSE	TRUE	FALSE
cg04576568	chr2	220377822	220377823	ASIC4	55515	-1068	CGI-N-Shore	TRUE	FALSE	FALSE
cg05759250	chr2	26251267	26251268	RAB10	10890	-5460	CGI	FALSE	FALSE	TRUE
cg06266613	chr2	119593464	119593465	EN1	2019	12293	CGI	FALSE	FALSE	TRUE
cg06795203	chr2	99224754	99224755	COA5	493753	225	CGI	TRUE	TRUE	FALSE
cg08887153	chr2	191492666	191492667	NAB1	4664	-21180	Non-CGI	FALSE	FALSE	TRUE
cg09301222	chr2	149267116	149267117	EPC2	26122	-135442	Non-CGI	FALSE	TRUE	FALSE
cg10762132	chr2	113403533	113403534	SLC20A1	6574	98	CGI	TRUE	FALSE	FALSE
cg10785443	chr2	219827728	219827729	CDK5R2	8941	3329	CGI	FALSE	FALSE	TRUE
cg11120927	chr2	239072674	239072675	KLHL30	377007	25310	CGI	TRUE	FALSE	FALSE
cg11444607	chr2	55509150	55509151	PRORSD1P	344405	-303	CGI-N-Shore	TRUE	FALSE	FALSE
cg12463851	chr2	237477186	237477187	CXCR7	57007	7761	CGI	TRUE	TRUE	FALSE
cg13407825	chr2	70314363	70314364	PCBP1-AS1	400960	-215	CGI	TRUE	FALSE	FALSE
cg13899678	chr2	105478933	105478934	POU3F3	5455	6963	CGI	FALSE	FALSE	TRUE
cg14512870	chr2	173330342	173330343	ITGA6	3655	38259	Non-CGI	TRUE	TRUE	FALSE
cg14875014	chr2	234262710	234262711	DGKD	8527	-441	CGI	TRUE	FALSE	FALSE
cg16711011	chr2	568198	568199	TMEM18	129787	109239	CGI	FALSE	FALSE	TRUE
cg17372494	chr2	27310078	27310079	KHK	3795	466	CGI	TRUE	FALSE	FALSE
cg20072442	chr2	80530255	80530256	LRRTM1	347730	1230	CGI	TRUE	TRUE	FALSE
cg20371266	chr2	233390781	233390782	CHRND	1144	-139	CGI-S-Shore	TRUE	FALSE	FALSE
cg22028161	chr2	95658954	95658955	MAL	4118	-32523	CGI	FALSE	FALSE	TRUE
cg22199615	chr2	167233070	167233071	SCN9A	6335	-572	CGI	TRUE	FALSE	FALSE
cg22939193	chr2	20190182	20190183	WDR35	57539	-297	CGI	TRUE	FALSE	FALSE
cg24174984	chr2	29117731	29117732	WDR43	23160	197	CGI	TRUE	FALSE	FALSE
cg25314706	chr2	128354089	128354090	GPR17	2840	-49348	CGI-S-Shelf	FALSE	TRUE	FALSE
cg26123256	chr2	27530670	27530671	UCN	7349	458	CGI	TRUE	TRUE	FALSE
cg26649384	chr2	154334651	154334652	RPRM	56475	669	CGI	TRUE	FALSE	FALSE
cg00345094	chr3	48342834	48342835	NME6	10201	50	CGI	TRUE	TRUE	FALSE
cg00800773	chr3	53195164	53195165	PRKCD	5580	-57	CGI	TRUE	FALSE	FALSE
cg00879003	chr3	137487186	137487187	SOX14	8403	4051	CGI	FALSE	FALSE	TRUE
cg00902873	chr3	127771089	127771090	SEC61A1	29927	-121	CGI	TRUE	FALSE	FALSE
cg01181817	chr3	49941376	49941377	MST1R	4486	-69	CGI	TRUE	FALSE	FALSE
cg01324883	chr3	23244690	23244691	UBE2E2	7325	36	CGI	TRUE	FALSE	FALSE
cg02523270	chr3	193987651	193987652	LOC100131551	100131551	42940	CGI	FALSE	FALSE	TRUE
cg03484180	chr3	49967517	49967518	MON1A	84315	-71	CGI	TRUE	FALSE	FALSE
cg05063999	chr3	64253605	64253606	PRICKLE2	166336	-42473	CGI	FALSE	FALSE	TRUE
cg05645404	chr3	105087242	105087243	ALCAM	214	1684	CGI-S-Shore	FALSE	TRUE	FALSE
cg05781968	chr3	55515607	55515608	WNT5A	7474	5722	CGI	TRUE	TRUE	FALSE
cg05964723	chr3	5229209	5229210	EDEM1	9695	-120	CGI	TRUE	FALSE	FALSE
cg06726935	chr3	9691813	9691814	MTMR14	64419	695	CGI-S-Shore	FALSE	TRUE	FALSE
cg07065220	chr3	193987540	193987541	LOC100131551	100131551	43051	CGI	FALSE	FALSE	TRUE
cg07852840	chr3	140813919	140813920	SPSB4	92369	43175	Non-CGI	FALSE	TRUE	FALSE
cg08772752	chr3	48632672	48632673	COL7A1	1294	-78	CGI	TRUE	FALSE	FALSE
cg08855568	chr3	61547104	61547105	PTPRG	5793	-137	CGI	TRUE	FALSE	FALSE
cg09330885	chr3	195536485	195536486	MUC4	4585	2357	CGI-N-Shore	FALSE	TRUE	FALSE
cg10958002	chr3	12200324	12200325	TIMP4	7079	525	CGI	TRUE	TRUE	FALSE
cg11103393	chr3	194968024	194968025	XXYLT1	152002	23869	Non-CGI	FALSE	TRUE	FALSE
cg11610350	chr3	64253705	64253706	PRICKLE2	166336	-42573	CGI	FALSE	FALSE	TRUE
cg12616683	chr3	127323572	127323573	MCM2	4171	6318	CGI	TRUE	TRUE	FALSE
cg13155421	chr3	105717036	105717037	CBLB	868	-128769	Non-CGI	FALSE	FALSE	TRUE
cg13475665	chr3	65582925	65582926	MAGI1	9223	441582	CGI	FALSE	TRUE	FALSE
cg16472210	chr3	81810621	81810622	GBE1	2632	327	CGI	TRUE	FALSE	FALSE
cg17172980	chr3	196755973	196755974	MFI2	4241	712	CGI	FALSE	TRUE	FALSE
cg17580935	chr3	65583240	65583241	MAGI1	9223	441267	CGI	FALSE	TRUE	FALSE
cg18274619	chr3	127494852	127494853	MGLL	11343	47197	Non-CGI	FALSE	TRUE	FALSE
cg18361815	chr3	46671334	46671335	LOC100132146	100132146	17408	CGI-N-Shore	FALSE	FALSE	TRUE
cg20571333	chr3	5229215	5229216	EDEM1	9695	-114	CGI	TRUE	FALSE	FALSE
cg21846808	chr3	193721215	193721216	LOC647323	647323	231	CGI	FALSE	TRUE	FALSE
cg22920300	chr3	181441364	181441365	SOX2	6657	11651	CGI-N-Shore	FALSE	TRUE	FALSE
cg23339720	chr3	140814055	140814056	SPSB4	92369	43311	Non-CGI	FALSE	TRUE	FALSE
cg23440822	chr3	173302462	173302463	NLGN1	22871	186217	CGI-N-Shore	TRUE	TRUE	FALSE
cg25319031	chr3	119813310	119813311	GSK3B	2932	-45	CGI	TRUE	FALSE	FALSE
cg25460158	chr3	157824714	157824715	SHOX2	6474	-761	CGI	TRUE	FALSE	FALSE
cg25823419	chr3	179169252	179169253	GNB4	59345	117	CGI	TRUE	FALSE	FALSE
cg26102096	chr3	52931604	52931605	TMEM110-MUSTN1	100526772	-6	CGI	TRUE	FALSE	FALSE
cg26116485	chr3	55515411	55515412	WNT5A	7474	5918	CGI	TRUE	TRUE	FALSE
cg27118968	chr3	161090472	161090473	SPTSSB	165679	-600	CGI	TRUE	FALSE	FALSE
cg01166145	chr4	55093692	55093693	GSX2	170825	127443	CGI	TRUE	TRUE	FALSE
cg02249911	chr4	185570676	185570677	CASP3	836	-46	CGI	TRUE	FALSE	FALSE
cg02510453	chr4	152020490	152020491	RPS3A	6189	-262	CGI	TRUE	FALSE	FALSE
cg05030698	chr4	6536785	6536786	PPP2R2C	5522	28540	CGI-S-Shore	FALSE	TRUE	FALSE
cg06672737	chr4	778827	778828	LOC100129917	100129917	-3190	CGI	FALSE	TRUE	FALSE
cg07150669	chr4	1402343	1402344	CRIPAK	285464	17002	CGI	FALSE	FALSE	TRUE
cg07647405	chr4	54220546	54220547	SCFD2	152579	11694	CGI	FALSE	TRUE	FALSE
cg08444731	chr4	71705269	71705270	GRSF1	2926	356	CGI	TRUE	FALSE	FALSE
cg08604533	chr4	1582248	1582249	FAM53A	152877	103738	CGI	FALSE	FALSE	TRUE
cg10453420	chr4	3874006	3874007	FAM86EP	348926	83140	CGI	FALSE	FALSE	TRUE
cg10783925	chr4	1322681	1322682	UVSSA	57654	-18421	CGI	FALSE	TRUE	FALSE
cg12036292	chr4	184319704	184319705	CDKN2AIP	55602	-46083	CGI	FALSE	FALSE	TRUE
cg12226095	chr4	27057954	27057955	STIM2	57620	195640	CGI-N-Shore	FALSE	FALSE	TRUE
cg13775316	chr4	109093218	109093219	LEF1	51176	-3105	CGI	TRUE	TRUE	FALSE
cg13783244	chr4	140005441	140005442	ELF2	1998	55208	CGI	TRUE	TRUE	FALSE
cg17807131	chr4	4854690	4854691	MSX1	4487	-6700	CGI	FALSE	FALSE	TRUE
cg18236211	chr4	13529864	13529865	LOC285547	285547	3175	CGI	FALSE	TRUE	FALSE
cg19300568	chr4	2060112	2060113	NAT8L	339983	-1125	CGI	TRUE	FALSE	FALSE
cg19590290	chr4	104119639	104119640	CENPE	1062	-72	CGI	TRUE	FALSE	FALSE
cg19704288	chr4	1582181	1582182	FAM53A	152877	103805	CGI	FALSE	FALSE	TRUE
cg20932348	chr4	26862197	26862198	STIM2	57620	-114	CGI	TRUE	FALSE	FALSE
cg21732915	chr4	156588072	156588073	GUCY1A3	2982	209	CGI-N-Shore	TRUE	FALSE	FALSE
cg21969516	chr4	127877756	127877757	INTU	27152	-676329	CGI	FALSE	FALSE	TRUE
cg22773661	chr4	48492225	48492226	ZAR1	326340	-82	CGI	TRUE	FALSE	FALSE
cg23502023	chr4	1581993	1581994	FAM53A	152877	103993	CGI	FALSE	FALSE	TRUE
cg24789447	chr4	148402574	148402575	EDNRA	1909	504	CGI	FALSE	TRUE	FALSE
cg25236971	chr4	17783059	17783060	FAM184B	27146	74	CGI	TRUE	FALSE	FALSE
cg26064774	chr4	6666009	6666010	LOC93622	93622	-9810	CGI	FALSE	FALSE	TRUE
cg27064287	chr4	102712082	102712083	BANK1	55024	370963	CGI	TRUE	TRUE	FALSE
cg27368606	chr4	186768730	186768731	SORBS2	8470	109138	Non-CGI	FALSE	TRUE	FALSE
cg00274815	chr5	178631741	178631742	ADAMTS2	9509	140688	CGI	FALSE	TRUE	FALSE
cg02067788	chr5	132387589	132387590	HSPA4	3308	-71	CGI	TRUE	FALSE	FALSE
cg02326568	chr5	158533621	158533622	EBF1	1879	-6832	CGI	FALSE	TRUE	FALSE
cg02655972	chr5	31194800	31194801	CDH6	1004	1037	CGI	FALSE	TRUE	FALSE
cg04232649	chr5	162864489	162864490	CCNG1	900	-86	CGI	TRUE	FALSE	FALSE
cg04646987	chr5	14406732	14406733	FAM105A	54491	-175157	CGI-S-Shore	FALSE	TRUE	FALSE
cg05016408	chr5	150326174	150326175	ZNF300P1	134466	-27	CGI	TRUE	FALSE	FALSE
cg05648672	chr5	126625864	126625865	MEGF10	84466	-590	CGI	TRUE	FALSE	FALSE
cg06060754	chr5	176797920	176797921	RGS14	10636	13075	CGI	FALSE	TRUE	FALSE
cg06897790	chr5	87564715	87564716	TMEM161B-AS1	100505894	15	CGI	TRUE	FALSE	FALSE
cg07576857	chr5	179635981	179635982	RASGEF1C	255426	147	CGI	FALSE	TRUE	FALSE
cg07671805	chr5	74907694	74907695	COL4A3BP	10087	-99887	CGI	FALSE	TRUE	FALSE
cg09059670	chr5	79552137	79552138	SERINC5	256987	-238	CGI	TRUE	FALSE	FALSE
cg09078081	chr5	416724	416725	C5orf55	116349	26532	CGI	FALSE	TRUE	FALSE
cg09741070	chr5	43040998	43040999	ANXA2R	389289	-550	CGI	TRUE	FALSE	FALSE
cg10737521	chr5	179335243	179335244	TBC1D9B	23061	-386	CGI-S-Shore	TRUE	FALSE	FALSE
cg10902427	chr5	176944034	176944035	DDX41	51428	-66	CGI	TRUE	FALSE	FALSE
cg13904970	chr5	123987667	123987668	ZNF608	57507	96831	CGI	FALSE	TRUE	FALSE
cg18515886	chr5	14665592	14665593	FAM105B	90268	808	CGI-S-Shore	FALSE	TRUE	FALSE
cg18782991	chr5	140479979	140479980	PCDHB3	56132	-253	CGI-N-Shore	TRUE	TRUE	FALSE
cg19749560	chr5	693491	693492	TPPP	11076	17	CGI	TRUE	FALSE	FALSE
cg22147084	chr5	179779664	179779665	GFPT2	9945	649	CGI	FALSE	TRUE	FALSE
cg22983282	chr5	3428598	3428599	LOC285577	285577	107608	CGI	FALSE	TRUE	FALSE
cg23256297	chr5	123987523	123987524	ZNF608	57507	96975	CGI	FALSE	TRUE	FALSE
cg23932859	chr5	126625777	126625778	MEGF10	84466	-677	CGI-N-Shore	TRUE	FALSE	FALSE
cg24030507	chr5	139089274	139089275	CXXC5	51523	60972	CGI	FALSE	FALSE	TRUE
cg24079969	chr5	141404761	141404762	GNPDA1	10007	-12140	Non-CGI	FALSE	FALSE	TRUE
cg24768292	chr5	123987423	123987424	ZNF608	57507	97075	CGI-N-Shore	FALSE	TRUE	FALSE
cg25409499	chr5	176170374	176170375	UNC5A	90249	-67184	CGI	FALSE	FALSE	TRUE
cg25591664	chr5	79551865	79551866	SERINC5	256987	31	CGI	TRUE	FALSE	FALSE
cg25774276	chr5	180617474	180617475	TRIM7	81786	14701	CGI	TRUE	FALSE	FALSE
cg26483081	chr5	87564747	87564748	TMEM161B-AS1	100505894	47	CGI	TRUE	FALSE	FALSE
cg26929261	chr5	175792123	175792124	ARL10	285598	-377	CGI	TRUE	FALSE	FALSE
cg26950557	chr5	38258441	38258442	EGFLAM	133584	-68	CGI	TRUE	FALSE	FALSE
cg00031256	chr6	2842255	2842256	SERPINB1	1992	-173	CGI	TRUE	FALSE	FALSE
cg01968402	chr6	137817775	137817776	OLIG3	167826	-2243	CGI	FALSE	FALSE	TRUE
cg02106850	chr6	85474093	85474094	TBX18	9096	-193	CGI	TRUE	FALSE	FALSE
cg02215115	chr6	39197417	39197418	KCNK5	8645	-165	CGI	TRUE	FALSE	FALSE
cg02401102	chr6	117923454	117923455	GOPC	57120	249	CGI	TRUE	FALSE	FALSE
cg02446647	chr6	133562101	133562102	EYA4	2070	364	CGI	TRUE	TRUE	FALSE
cg04086445	chr6	33290840	33290841	DAXX	1616	-46	CGI	TRUE	FALSE	FALSE
cg04136781	chr6	32129786	32129787	EGFL8	80864	-2594	Non-CGI	FALSE	TRUE	FALSE
cg04825872	chr6	149381604	149381605	LOC100128176	100128176	-95783	Non-CGI	FALSE	TRUE	FALSE
cg05439195	chr6	169613210	169613211	THBS2	7058	40925	CGI	FALSE	FALSE	TRUE
cg05676377	chr6	26383673	26383674	BTN2A2	10385	348	CGI	FALSE	TRUE	FALSE
cg06739664	chr6	28806924	28806925	LOC401242	401242	24528	CGI	TRUE	FALSE	FALSE
cg07265873	chr6	30851940	30851941	DDR1	780	1245	CGI-N-Shore	TRUE	TRUE	FALSE
cg08312626	chr6	27534137	27534138	ZNF184	7738	-93239	CGI	FALSE	FALSE	TRUE
cg08344081	chr6	41339785	41339786	NCR2	9436	36256	CGI	FALSE	FALSE	TRUE
cg08417229	chr6	169682364	169682365	THBS2	7058	-28226	Non-CGI	FALSE	FALSE	TRUE
cg08497487	chr6	30042188	30042189	RNF39	80352	1438	CGI-N-Shore	FALSE	TRUE	FALSE
cg08672023	chr6	35423591	35423592	FANCE	2178	3452	CGI-S-Shelf	FALSE	TRUE	FALSE
cg08857039	chr6	42110396	42110397	C6orf132	647024	317	CGI	TRUE	FALSE	FALSE
cg09107912	chr6	159590059	159590060	FNDC1	84624	-368	CGI	TRUE	FALSE	FALSE
cg09655876	chr6	161561066	161561067	AGPAT4-IT1	79992	21946	CGI-N-Shelf	FALSE	TRUE	FALSE
cg09681335	chr6	74233510	74233511	EEF1A1	1915	-2754	CGI	FALSE	FALSE	TRUE
cg12213602	chr6	32095943	32095944	ATF6B	1388	72	CGI	TRUE	FALSE	FALSE
cg12956380	chr6	169568536	169568537	THBS2	7058	85599	CGI-S-Shore	FALSE	FALSE	TRUE
cg13104508	chr6	157527531	157527532	TMEM242	729515	217720	CGI	FALSE	TRUE	FALSE
cg13401368	chr6	137365761	137365762	IL20RA	53832	535	CGI	TRUE	TRUE	FALSE
cg13727613	chr6	45389871	45389872	SUPT3H	8464	-44200	CGI	TRUE	TRUE	FALSE
cg14555824	chr6	169613281	169613282	THBS2	7058	40854	CGI	FALSE	FALSE	TRUE
cg14817541	chr6	133563868	133563869	EYA4	2070	2131	CGI	FALSE	TRUE	FALSE
cg15338675	chr6	28193028	28193029	ZSCAN9	7746	0	CGI	TRUE	FALSE	FALSE
cg16907669	chr6	3064109	3064110	RIPK1	8737	-11	CGI	TRUE	FALSE	FALSE
cg17279754	chr6	27585300	27585301	LOC100507173	100507173	-76512	CGI	TRUE	FALSE	FALSE
cg17417193	chr6	45983110	45983111	CLIC5	53405	64973	CGI	FALSE	TRUE	FALSE
cg18827738	chr6	112408577	112408578	FAM229B	619208	-95	CGI	TRUE	TRUE	FALSE
cg19155518	chr6	101849938	101849939	GRIK2	2898	3268	CGI	FALSE	TRUE	FALSE
cg19579695	chr6	150039400	150039401	LATS1	9113	-7	CGI	TRUE	FALSE	FALSE
cg19884556	chr6	159128336	159128337	SYTL3	94120	57289	CGI-S-Shelf	FALSE	TRUE	FALSE
cg19964491	chr6	32016236	32016237	CYP21A2	1589	10142	CGI	TRUE	TRUE	FALSE
cg20168806	chr6	10382828	10382829	LOC100130275	100130275	-29721	CGI	FALSE	FALSE	TRUE
cg20203357	chr6	166919577	166919578	MIR1913	100302141	3342	CGI-S-Shore	FALSE	TRUE	FALSE
cg21128951	chr6	40996213	40996214	TSPO2	222642	-14022	CGI	FALSE	TRUE	FALSE
cg22809408	chr6	31409700	31409701	HCP5	10866	-21255	CGI-S-Shore	FALSE	FALSE	TRUE
cg22941165	chr6	30524974	30524975	GNL1	2794	395	CGI	TRUE	FALSE	FALSE
cg23278060	chr6	83777448	83777449	DOPEY1	23033	62	CGI	TRUE	FALSE	FALSE
cg24584951	chr6	41888893	41888894	MED20	9477	-15	CGI	TRUE	FALSE	FALSE
cg26482585	chr6	31461768	31461769	MICB	4277	-888	CGI	TRUE	FALSE	FALSE
cg27237745	chr6	74072271	74072272	KHDC3L	154288	-127	CGI	TRUE	FALSE	FALSE
cg00078270	chr7	2005255	2005256	MIR4655	100616160	-121365	CGI	FALSE	TRUE	FALSE
cg00376553	chr7	100073281	100073282	TSC22D4	81628	3619	CGI-N-Shelf	FALSE	TRUE	FALSE
cg00419512	chr7	45953027	45953028	IGFBP3	3486	7842	Non-CGI	FALSE	TRUE	FALSE
cg00840332	chr7	127881269	127881270	LEP	3952	-60	CGI	TRUE	FALSE	FALSE
cg02067211	chr7	76178571	76178572	LOC100133091	100133091	-85	CGI	TRUE	FALSE	FALSE
cg02990291	chr7	96625586	96625587	DLX6	1750	-9702	CGI-N-Shore	FALSE	TRUE	FALSE
cg03309421	chr7	32535387	32535388	AVL9	23080	210	CGI	TRUE	FALSE	FALSE
cg03785696	chr7	27224460	27224461	HOXA11	3207	380	CGI	TRUE	TRUE	FALSE
cg05669210	chr7	100450634	100450635	SLC12A9	56996	275	CGI-S-Shore	TRUE	TRUE	FALSE
cg06898199	chr7	128502890	128502891	ATP6V1F	9296	32	CGI	TRUE	TRUE	FALSE
cg07651242	chr7	45614720	45614721	ADCY1	107	980	CGI	TRUE	TRUE	FALSE
cg08017928	chr7	156801818	156801819	MNX1	3110	1527	CGI	TRUE	TRUE	FALSE
cg10003032	chr7	6200116	6200117	USP42	84132	55565	CGI-S-Shore	FALSE	TRUE	FALSE
cg10087754	chr7	2678263	2678264	TTYH3	80727	6659	CGI-N-Shore	FALSE	TRUE	FALSE
cg10348543	chr7	100209640	100209641	MOSPD3	64598	-83	CGI-N-Shore	TRUE	FALSE	FALSE
cg10876076	chr7	37960873	37960874	EPDR1	54749	709	CGI	TRUE	TRUE	FALSE
cg10884288	chr7	4922196	4922197	RADIL	55698	1137	CGI	FALSE	TRUE	FALSE
cg11318054	chr7	157361692	157361693	MIR153-2	406945	5420	CGI	FALSE	TRUE	FALSE
cg11697111	chr7	1126903	1126904	GPER	2852	5058	CGI	TRUE	TRUE	FALSE
cg11980004	chr7	1571105	1571106	MAFK	7975	736	CGI	FALSE	TRUE	FALSE
cg12548629	chr7	92463334	92463335	CDK6	1021	2605	CGI	TRUE	TRUE	FALSE
cg13120875	chr7	144533471	144533472	TPK1	27010	-324	CGI-S-Shore	TRUE	FALSE	FALSE
cg13334285	chr7	27779610	27779611	TAX1BP1	8887	617	CGI-S-Shore	TRUE	TRUE	FALSE
cg14472810	chr7	1936732	1936733	MIR4655	100616160	-52842	CGI-S-Shore	FALSE	TRUE	FALSE
cg14625175	chr7	27214056	27214057	MIR196B	442920	-4873	CGI	TRUE	TRUE	FALSE
cg14708875	chr7	100209945	100209946	MOSPD3	64598	219	CGI	TRUE	TRUE	FALSE
cg16586152	chr7	106301062	106301063	CCDC71L	168455	570	CGI	TRUE	TRUE	FALSE
cg17431401	chr7	23511004	23511005	IGF2BP3	10643	-1008	CGI	TRUE	FALSE	FALSE
cg19335954	chr7	156433367	156433368	RNF32	140545	13	CGI	TRUE	FALSE	FALSE
cg19364784	chr7	149416823	149416824	KRBA1	84626	4720	CGI	TRUE	TRUE	FALSE
cg19987253	chr7	1981314	1981315	MIR4655	100616160	-97424	CGI	TRUE	TRUE	FALSE
cg21496408	chr7	106301534	106301535	CCDC71L	168455	98	CGI	TRUE	TRUE	FALSE
cg21784917	chr7	79084038	79084039	MAGI2	9863	-1147	CGI-S-Shore	TRUE	TRUE	FALSE
cg22087659	chr7	99516845	99516846	TRIM4	89122	376	CGI	TRUE	FALSE	FALSE
cg22491548	chr7	128000861	128000862	PRRT4	401399	876	CGI-N-Shore	FALSE	TRUE	FALSE
cg23058037	chr7	158824108	158824109	LINC00689	154822	23062	CGI	FALSE	TRUE	FALSE
cg23687058	chr7	155601903	155601904	SHH	6469	3062	CGI	TRUE	TRUE	FALSE
cg23738624	chr7	142553157	142553158	EPHB6	2051	364	CGI-S-Shore	FALSE	TRUE	FALSE
cg24586376	chr7	955551	955552	ADAP1	11033	59682	CGI	FALSE	TRUE	FALSE
cg26002512	chr7	119913771	119913772	KCND2	3751	48	CGI	TRUE	FALSE	FALSE
cg27050550	chr7	44613552	44613553	DDX56	54606	583	CGI	TRUE	FALSE	FALSE
cg27172488	chr7	157219499	157219500	DNAJB6	10049	89788	CGI	FALSE	FALSE	TRUE
cg00140501	chr8	23104037	23104038	CHMP7	91782	2886	CGI	TRUE	TRUE	FALSE
cg00837987	chr8	588849	588850	ERICH1	157697	92375	CGI	FALSE	FALSE	TRUE
cg03483150	chr8	57358651	57358652	PENK	5179	629	CGI	TRUE	TRUE	FALSE
cg04057016	chr8	81806169	81806170	ZNF704	619279	-19152	CGI	FALSE	FALSE	TRUE
cg04219247	chr8	104383715	104383716	CTHRC1	115908	-69	CGI	TRUE	FALSE	FALSE
cg04917181	chr8	98290229	98290230	TSPYL5	85453	-52	CGI	TRUE	FALSE	FALSE
cg05754853	chr8	116660506	116660507	TRPS1	7227	20720	CGI-N-Shore	FALSE	TRUE	FALSE
cg08283882	chr8	25901017	25901018	EBF2	64641	1621	CGI	FALSE	TRUE	FALSE
cg08415738	chr8	67578921	67578922	VCPIP1	80124	529	CGI	TRUE	FALSE	FALSE
cg08907891	chr8	22926898	22926899	TNFRSF10B	8795	-197	CGI	TRUE	TRUE	FALSE
cg09056309	chr8	37594104	37594105	ERLIN2	11160	6	CGI	TRUE	TRUE	FALSE
cg10389722	chr8	55047757	55047758	MRPL15	29088	-22	CGI	TRUE	FALSE	FALSE
cg12444845	chr8	56685709	56685710	TGS1	96764	-80	CGI	TRUE	TRUE	FALSE
cg13045134	chr8	103741780	103741781	KLF10	7071	-73796	Non-CGI	FALSE	FALSE	TRUE
cg13242160	chr8	55294610	55294611	SOX17	64321	-75883	CGI-N-Shore	FALSE	FALSE	TRUE
cg14491007	chr8	37553265	37553266	ZNF703	80139	-34	CGI	TRUE	FALSE	FALSE
cg15684290	chr8	6263623	6263624	LOC100287015	100287015	444	CGI	TRUE	FALSE	FALSE
cg18233405	chr8	98290148	98290149	TSPYL5	85453	26	CGI	TRUE	FALSE	FALSE
cg18331249	chr8	98862165	98862166	MATN2	4147	-19144	Non-CGI	FALSE	TRUE	FALSE
cg18404112	chr8	144893173	144893174	MIR937	100126338	2037	CGI	FALSE	TRUE	FALSE
cg18554986	chr8	87526577	87526578	CPNE3	8895	-77	CGI-N-Shore	TRUE	FALSE	FALSE
cg18833573	chr8	144822305	144822306	LOC100128338	100128338	5994	CGI	TRUE	TRUE	FALSE
cg19880942	chr8	69672404	69672405	LOC100505718	100505718	344019	Non-CGI	FALSE	TRUE	FALSE
cg20135243	chr8	27183285	27183286	PTK2B	2185	14285	CGI	FALSE	TRUE	FALSE
cg20154084	chr8	91013454	91013455	DECR1	1666	-124	CGI	TRUE	FALSE	FALSE
cg20392240	chr8	104383724	104383725	CTHRC1	115908	-60	CGI	TRUE	FALSE	FALSE
cg20447655	chr8	104383722	104383723	CTHRC1	115908	-62	CGI	TRUE	FALSE	FALSE
cg21449445	chr8	144546357	144546358	MAFA	389692	-33754	CGI-S-Shore	FALSE	TRUE	FALSE
cg21461564	chr8	63999030	63999031	TTPA	7274	-417	CGI	TRUE	FALSE	FALSE
cg21479226	chr8	69244510	69244511	LOC286189	286189	-783	CGI	TRUE	TRUE	FALSE
cg22291627	chr8	116660697	116660698	TRPS1	7227	20529	CGI	FALSE	TRUE	FALSE
cg23309257	chr8	144679350	144679351	EEF1D	1936	493	CGI	TRUE	TRUE	FALSE
cg25623409	chr8	97657368	97657369	CPQ	10404	-129	CGI	TRUE	FALSE	FALSE
cg13507888	chr9	132199983	132199984	LOC100506190	100506190	-45745	CGI-S-Shore	FALSE	FALSE	TRUE
cg13530448	chr9	86535695	86535696	KIF27	55582	645	CGI	FALSE	TRUE	FALSE
cg13583664	chr9	132016282	132016283	C9orf106	414318	-67011	Non-CGI	FALSE	FALSE	TRUE
cg13601435	chr9	120507431	120507432	TLR4	7099	40970	CGI	FALSE	FALSE	TRUE
cg13618741	chr9	137535210	137535211	COL5A1	1289	1557	CGI	FALSE	TRUE	FALSE
cg13751417	chr9	136814406	136814407	VAV2	7410	43038	CGI-S-Shore	FALSE	TRUE	FALSE
cg13849454	chr9	14348844	14348845	NFIB	4781	50136	CGI	FALSE	TRUE	FALSE
cg14159790	chr9	139886506	139886507	C9orf142	286257	-362	CGI	TRUE	FALSE	FALSE
cg14339556	chr9	36572881	36572882	MELK	9833	-22	CGI	TRUE	FALSE	FALSE
cg14436106	chr9	116817641	116817642	AMBP	259	23109	CGI	FALSE	TRUE	FALSE
cg14522718	chr9	130868874	130868875	LOC100289019	100289019	12137	Non-CGI	FALSE	TRUE	FALSE
cg00056066	chr10	25010738	25010739	ARHGAP21	57584	1857	CGI	FALSE	TRUE	FALSE
cg00588614	chr10	43932900	43932901	ZNF487P	642819	325	CGI-S-Shore	FALSE	TRUE	FALSE
cg02097843	chr10	33269812	33269813	ITGB1	3688	-22518	CGI	FALSE	FALSE	TRUE
cg03790325	chr10	46089985	46089986	MARCH8	220972	367	CGI	TRUE	FALSE	FALSE
cg04417773	chr10	80909901	80909902	ZMIZ1	57178	81108	Non-CGI	FALSE	TRUE	FALSE
cg05528280	chr10	464225	464226	PRR26	414235	-231661	CGI	FALSE	TRUE	FALSE
cg05627029	chr10	122708532	122708533	WDR11-AS1	283089	-97840	CGI-N-Shore	FALSE	FALSE	TRUE
cg06648277	chr10	134600489	134600490	NKX6-2	84504	-951	CGI	TRUE	FALSE	FALSE
cg06834274	chr10	27444248	27444249	MASTL	84930	494	CGI	TRUE	FALSE	FALSE
cg06960203	chr10	134681626	134681627	NA	255352	74461	CGI	FALSE	TRUE	FALSE
cg07143043	chr10	133784298	133784299	BNIP3	664	11135	CGI	TRUE	TRUE	FALSE
cg08487063	chr10	102894639	102894640	TLX1	3195	3577	CGI	FALSE	TRUE	FALSE
cg10518327	chr10	77161702	77161703	ZNF503	84858	-188	CGI	TRUE	FALSE	FALSE
cg11113066	chr10	101281981	101281982	NKX2-3	159296	-10707	CGI	FALSE	FALSE	TRUE
cg12378753	chr10	116527201	116527202	ABLIM1	3983	816	CGI-N-Shore	FALSE	TRUE	FALSE
cg12390516	chr10	13481846	13481847	BEND7	222389	63128	CGI	FALSE	TRUE	FALSE
cg13303464	chr10	130844209	130844210	MGMT	4255	-421243	CGI	FALSE	FALSE	TRUE
cg13331196	chr10	88295591	88295592	WAPAL	23063	-14049	CGI	FALSE	FALSE	TRUE
cg14194367	chr10	78651415	78651416	KCNMA1	3778	746160	Non-CGI	FALSE	TRUE	FALSE
cg15701254	chr10	106075068	106075069	ITPRIP	85450	23092	CGI	TRUE	TRUE	FALSE
cg16834496	chr10	115438884	115438885	CASP7	840	-49	CGI	TRUE	FALSE	FALSE
cg18259520	chr10	50603925	50603926	DRGX	644168	-438	CGI	TRUE	FALSE	FALSE
cg18785410	chr10	129924519	129924520	MKI67	4288	-50	CGI	TRUE	FALSE	FALSE
cg19225923	chr10	1034293	1034294	GTPBP4	23560	-54	CGI	TRUE	FALSE	FALSE
cg19726408	chr10	105428651	105428652	LOC100505839	100505839	-77884	CGI-S-Shore	TRUE	TRUE	FALSE
cg19732605	chr10	86300605	86300606	CCSER2	54462	212194	CGI	FALSE	FALSE	TRUE
cg20521527	chr10	101292635	101292636	NKX2-3	159296	-53	CGI	TRUE	FALSE	FALSE
cg20715589	chr10	25305338	25305339	THNSL1	79896	-168	CGI	TRUE	TRUE	FALSE
cg22210565	chr10	88281727	88281728	WAPAL	23063	-185	CGI	TRUE	FALSE	FALSE
cg23346408	chr10	81001957	81001958	PPIF	10105	-105261	CGI-N-Shore	TRUE	TRUE	FALSE
cg23580024	chr10	93811989	93811990	BTAF1	9044	128252	Non-CGI	FALSE	TRUE	FALSE
cg24171294	chr10	6205688	6205689	MIR3155B	100628560	-11462	CGI	FALSE	TRUE	FALSE
cg24293903	chr10	101418955	101418956	SLC25A28	81894	37	CGI	TRUE	FALSE	FALSE
cg24487372	chr10	73137135	73137136	CDH23	64072	-19554	CGI	FALSE	FALSE	TRUE
cg25195302	chr10	111970950	111970951	MXI1	4601	3586	CGI	FALSE	TRUE	FALSE
cg25497250	chr10	95326974	95326975	FFAR4	338557	551	CGI	TRUE	FALSE	FALSE
cg25535587	chr10	82116456	82116457	DYDC1	143241	53	CGI	TRUE	TRUE	FALSE
cg26378680	chr10	33269778	33269779	ITGB1	3688	-22484	CGI	FALSE	FALSE	TRUE
cg26709251	chr10	27389621	27389622	ANKRD26	22852	-193	CGI	TRUE	FALSE	FALSE
cg26929272	chr10	88295210	88295211	WAPAL	23063	-13668	CGI	FALSE	FALSE	TRUE
cg27422348	chr10	64577407	64577408	EGR2	1959	1518	CGI	TRUE	TRUE	FALSE
cg00322927	chr11	132707687	132707688	OPCML	4978	694714	Non-CGI	FALSE	TRUE	FALSE
cg01158277	chr11	111783327	111783328	HSPB2-C11orf52	100528019	-131	CGI-N-Shore	TRUE	FALSE	FALSE
cg01706556	chr11	46638814	46638815	ATG13	9776	-10	CGI	TRUE	FALSE	FALSE
cg01952234	chr11	32457130	32457131	WT1	7490	-48	CGI	TRUE	FALSE	FALSE
cg02635948	chr11	62494576	62494577	HNRNPUL2-BSCL2	100534595	279	CGI	TRUE	FALSE	FALSE
cg04285064	chr11	113644425	113644426	ZW10	9183	58	CGI	TRUE	FALSE	FALSE
cg04573276	chr11	35639632	35639633	FJX1	24147	-101	CGI	TRUE	FALSE	FALSE
cg04628008	chr11	113931000	113931001	ZBTB16	7704	568	CGI	TRUE	TRUE	FALSE
cg04650653	chr11	1890901	1890902	MIR4298	100423021	-10134	CGI-N-Shore	TRUE	TRUE	FALSE
cg05192269	chr11	560868	560869	C11orf35	256329	-88	CGI	TRUE	FALSE	FALSE
cg07428323	chr11	109294233	109294234	C11orf87	399947	1386	CGI	TRUE	TRUE	FALSE
cg09100988	chr11	66725961	66725962	PC	5091	-113	CGI	TRUE	FALSE	FALSE
cg09182533	chr11	63775071	63775072	OTUB1	55611	21745	CGI	FALSE	TRUE	FALSE
cg10102256	chr11	18034688	18034689	SERGEF	26297	-50	CGI	TRUE	FALSE	FALSE
cg11558328	chr11	46722331	46722332	ZNF408	79797	13	CGI	TRUE	FALSE	FALSE
cg11694519	chr11	111783563	111783564	HSPB2-C11orf52	100528019	102	CGI	TRUE	FALSE	FALSE
cg11717054	chr11	279423	279424	NLRP6	171389	852	CGI	FALSE	TRUE	FALSE
cg11880646	chr11	61638900	61638901	FADS3	3995	20104	CGI	FALSE	FALSE	TRUE
cg12139190	chr11	3014171	3014172	NAP1L4	4676	-563	CGI	TRUE	FALSE	FALSE
cg13570972	chr11	31839632	31839633	PAX6	5080	-122	CGI	TRUE	TRUE	FALSE
cg13663300	chr11	22688474	22688475	GAS2	2620	313	CGI	TRUE	TRUE	FALSE
cg15079934	chr11	1892307	1892308	MIR4298	100423021	-11540	CGI	TRUE	TRUE	FALSE
cg15174564	chr11	120856801	120856802	TBCEL	219899	-38000	CGI	FALSE	TRUE	FALSE
cg15778054	chr11	77734334	77734335	KCTD14	65987	-13	CGI-S-Shore	TRUE	TRUE	FALSE
cg16132555	chr11	189654	189655	SCGB1C1	147199	-3424	CGI	FALSE	FALSE	TRUE
cg17080504	chr11	86383557	86383558	ME3	10873	119	CGI	TRUE	FALSE	FALSE
cg17651317	chr11	68080928	68080929	LRP5	4041	819	CGI	FALSE	TRUE	FALSE
cg17976635	chr11	69490191	69490192	ORAOV1	220064	-25	CGI	TRUE	FALSE	FALSE
cg17982643	chr11	114271336	114271337	RBM7	10179	-46	CGI	TRUE	FALSE	FALSE
cg19704853	chr11	125133609	125133610	PKNOX2	63876	99049	CGI	FALSE	TRUE	FALSE
cg19964581	chr11	68540558	68540559	MTL5	9633	-21569	CGI	FALSE	TRUE	FALSE
cg21052766	chr11	20134289	20134290	DBX1	120237	47579	Non-CGI	FALSE	TRUE	FALSE
cg21173406	chr11	44338128	44338129	ALX4	60529	-6411	CGI	FALSE	FALSE	TRUE
cg21852408	chr11	109294190	109294191	C11orf87	399947	1343	CGI	TRUE	TRUE	FALSE
cg21923077	chr11	64053511	64053512	BAD	572	-1334	CGI	TRUE	TRUE	FALSE
cg23438841	chr11	3663491	3663492	ART5	116969	53	CGI	TRUE	FALSE	FALSE
cg24197212	chr11	67196182	67196183	RPS6KB2	6199	246	CGI	FALSE	TRUE	FALSE
cg24826892	chr11	71159390	71159391	DHCR7	1717	85	CGI	TRUE	FALSE	FALSE
cg24882097	chr11	102188439	102188440	BIRC3	330	257	CGI	FALSE	TRUE	FALSE
cg24960947	chr11	65816463	65816464	GAL3ST3	89792	186	CGI-N-Shore	FALSE	TRUE	FALSE
cg26054336	chr11	47586799	47586800	PTPMT1	114971	-181	CGI-N-Shore	TRUE	FALSE	FALSE
cg26242583	chr11	24518379	24518380	LUZP2	338645	-135	CGI	TRUE	FALSE	FALSE
cg26304119	chr11	67265369	67265370	PITPNM1	9600	7472	CGI-S-Shelf	FALSE	TRUE	FALSE
cg27431761	chr11	8361327	8361328	LMO1	4004	-71144	CGI	FALSE	FALSE	TRUE
cg27455796	chr11	45868850	45868851	CRY2	1408	180	CGI	TRUE	TRUE	FALSE
cg00159243	chr12	109023799	109023800	SELPLG	6404	3869	Non-CGI	FALSE	TRUE	FALSE
cg00470766	chr12	42984236	42984237	PRICKLE1	144165	-663	CGI	TRUE	FALSE	FALSE
cg00769775	chr12	125412987	125412988	UBC	7316	-13399	CGI	TRUE	FALSE	FALSE
cg01043320	chr12	51419821	51419822	SLC11A2	4891	2235	CGI	TRUE	TRUE	FALSE
cg02566159	chr12	27175468	27175469	MED21	9412	-13	CGI	TRUE	FALSE	FALSE
cg03861966	chr12	94136602	94136603	CRADD	8738	65450	CGI	FALSE	TRUE	FALSE
cg06242879	chr12	56497745	56497746	PA2G4	5036	-356	CGI-N-Shore	TRUE	FALSE	FALSE
cg07134316	chr12	57488112	57488113	NAB2	4665	5434	Non-CGI	FALSE	TRUE	FALSE
cg07469792	chr12	26112121	26112122	RASSF8	11228	156	CGI	TRUE	TRUE	FALSE
cg08198711	chr12	4380827	4380828	CCND2	894	-2073	CGI	FALSE	FALSE	TRUE
cg09525523	chr12	16064153	16064154	DERA	51071	-31	CGI	TRUE	FALSE	FALSE
cg10995082	chr12	111284795	111284796	CCDC63	160762	-14	CGI	TRUE	FALSE	FALSE
cg13190986	chr12	133263482	133263483	POLE	5426	461	CGI-N-Shore	TRUE	TRUE	FALSE
cg14202478	chr12	67463281	67463282	CAND1	55832	-199778	CGI	FALSE	FALSE	TRUE
cg16496462	chr12	124854282	124854283	FAM101A	144347	80571	CGI	FALSE	TRUE	FALSE
cg19464320	chr12	121148158	121148159	UNC119B	84747	326	CGI-N-Shore	TRUE	FALSE	FALSE
cg19725903	chr12	14721020	14721021	PLBD1	79887	-228	CGI	TRUE	FALSE	FALSE
cg19892287	chr12	54412688	54412689	HOXC4	3221	2045	CGI	FALSE	TRUE	FALSE
cg19897003	chr12	113592610	113592611	CCDC42B	387885	4946	CGI-S-Shore	FALSE	TRUE	FALSE
cg20667825	chr12	6420034	6420035	PLEKHG6	55200	431	CGI	TRUE	TRUE	FALSE
cg21415068	chr12	49716697	49716698	TROAP	10024	-272	CGI	TRUE	FALSE	FALSE
cg22790973	chr12	51566990	51566991	TFCP2	7024	-63	CGI	TRUE	FALSE	FALSE
cg25007393	chr12	132334122	132334123	MMP17	4326	21180	CGI-S-Shore	FALSE	TRUE	FALSE
cg27504582	chr12	1609490	1609491	LOC100292680	100292680	-165	CGI	TRUE	FALSE	FALSE
cg00124836	chr13	111295144	111295145	CARKD	55739	27336	CGI	FALSE	TRUE	FALSE
cg03654391	chr13	100037618	100037619	MIR548AN	100616144	20934	Non-CGI	FALSE	TRUE	FALSE
cg07311313	chr13	28543507	28543508	CDX2	1045	-189	CGI	TRUE	FALSE	FALSE
cg09450063	chr13	108922504	108922505	TNFSF13B	10673	526	Non-CGI	TRUE	FALSE	FALSE
cg12984905	chr13	20692744	20692745	GJA3	2700	42437	CGI	FALSE	FALSE	TRUE
cg20161029	chr13	31377406	31377407	ALOX5AP	241	89790	CGI	FALSE	FALSE	TRUE
cg01676105	chr14	78447640	78447641	ADCK1	57143	181213	CGI	FALSE	FALSE	TRUE
cg04362790	chr14	100223811	100223812	EML1	2009	19741	Non-CGI	FALSE	TRUE	FALSE
cg05224827	chr14	50999389	50999390	MAP4K5	11183	-12	CGI	TRUE	FALSE	FALSE
cg05842348	chr14	37133116	37133117	PAX9	5083	6342	CGI	FALSE	TRUE	FALSE
cg06744057	chr14	73493715	73493716	ZFYVE1	53349	203	CGI	TRUE	FALSE	FALSE
cg07019438	chr14	34419546	34419547	EGLN3	112399	736	CGI	FALSE	TRUE	FALSE
cg09269652	chr14	102688924	102688925	MOK	5891	82605	CGI-N-Shore	FALSE	TRUE	FALSE
cg10059536	chr14	104583245	104583246	MIR203	406986	-495	CGI	TRUE	FALSE	FALSE
cg14513822	chr14	50319573	50319574	NEMF	9147	-33	CGI	TRUE	FALSE	FALSE
cg18294691	chr14	38080669	38080670	FOXA1	3169	-16179	CGI	FALSE	TRUE	FALSE
cg18909698	chr14	69620434	69620435	DCAF5	8816	-519	CGI	TRUE	FALSE	FALSE
cg19960692	chr14	75726024	75726025	FOS	2353	-19455	CGI	FALSE	FALSE	TRUE
cg02259324	chr15	78111196	78111197	LOC645752	645752	107990	CGI	FALSE	FALSE	TRUE
cg02788419	chr15	101142563	101142564	LINS	55180	-117	CGI	TRUE	FALSE	FALSE
cg05732956	chr15	98447696	98447697	ARRDC4	91947	-15086	CGI	FALSE	FALSE	TRUE
cg08479319	chr15	66648941	66648942	TIPIN	54962	111	CGI	FALSE	TRUE	FALSE
cg08779207	chr15	40586496	40586497	ANKRD63	100131244	-11708	CGI-S-Shelf	FALSE	TRUE	FALSE
cg09498379	chr15	56285741	56285742	NEDD4	4734	92	CGI	TRUE	FALSE	FALSE
cg11592786	chr15	89533581	89533582	MFGE8	4240	-76917	Non-CGI	FALSE	FALSE	TRUE
cg12591770	chr15	100913571	100913572	FLJ42289	388182	-22647	CGI	FALSE	FALSE	TRUE
cg14023999	chr15	90543224	90543225	ZNF710	374655	-1526	CGI-N-Shore	TRUE	FALSE	FALSE
cg14433497	chr15	76634516	76634517	ISL2	64843	5368	CGI	FALSE	TRUE	FALSE
cg14903685	chr15	70391316	70391317	TLE3	7090	-1059	CGI	TRUE	FALSE	FALSE
cg15284457	chr15	100258174	100258175	LYSMD4	145748	15450	Non-CGI	FALSE	TRUE	FALSE
cg16477190	chr15	72612853	72612854	PARP6	56965	-49224	CGI	TRUE	TRUE	FALSE
cg16805171	chr15	85174652	85174653	SCAND2P	54581	-37	CGI	TRUE	FALSE	FALSE
cg17168328	chr15	57210864	57210865	LOC145783	145783	-166	CGI	TRUE	TRUE	FALSE
cg17467550	chr15	40986702	40986703	LOC100505648	100505648	599	CGI	TRUE	TRUE	FALSE
cg17744158	chr15	52043805	52043806	TMOD2	29767	46	CGI	TRUE	FALSE	FALSE
cg18254123	chr15	80544661	80544662	LOC283688	283688	89484	CGI-S-Shore	FALSE	FALSE	TRUE
cg18567174	chr15	68126065	68126066	SKOR1	390598	8123	CGI	FALSE	TRUE	FALSE
cg20540209	chr15	76633981	76633982	ISL2	64843	4833	CGI	FALSE	TRUE	FALSE
cg20560283	chr15	67228949	67228950	SMAD3	4088	-129244	CGI	FALSE	FALSE	TRUE
cg22488745	chr15	53096763	53096764	ONECUT1	3175	-14553	CGI	FALSE	FALSE	TRUE
cg22935921	chr15	78556834	78556835	DNAJA4	55466	346	CGI	TRUE	TRUE	FALSE
cg23005885	chr15	90543450	90543451	ZNF710	374655	-1300	CGI-N-Shore	TRUE	FALSE	FALSE
cg24317647	chr15	85523201	85523202	PDE8A	5151	-541	CGI-N-Shore	TRUE	FALSE	FALSE
cg24500441	chr15	66274709	66274710	MIR4311	100422905	-57860	CGI	FALSE	TRUE	FALSE
cg27351321	chr15	89632159	89632160	ABHD2	11057	777	CGI	FALSE	TRUE	FALSE
cg00547727	chr16	714968	714969	RHOT2	89941	-3113	CGI-S-Shore	TRUE	TRUE	FALSE
cg00851389	chr16	56669681	56669682	MT1JP	4498	29	CGI	TRUE	TRUE	FALSE
cg01120902	chr16	68563994	68563995	ZFP90	146198	-52	CGI	TRUE	FALSE	FALSE
cg01684528	chr16	4233614	4233615	SRL	6345	58465	CGI	FALSE	FALSE	TRUE
cg01865825	chr16	850240	850241	GNG13	51764	491	CGI-N-Shore	FALSE	TRUE	FALSE
cg03104758	chr16	57219801	57219802	FAM192A	80011	173	CGI	TRUE	FALSE	FALSE
cg03877960	chr16	5079023	5079024	NAGPA-AS1	100507589	-4678	CGI-S-Shore	TRUE	TRUE	FALSE
cg04067574	chr16	87998207	87998208	BANP	54971	13968	CGI	FALSE	TRUE	FALSE
cg04131583	chr16	86529961	86529962	FENDRR	400550	12503	CGI	FALSE	TRUE	FALSE
cg05290300	chr16	80966763	80966764	CENPN	55839	-73338	CGI	FALSE	FALSE	TRUE
cg05456022	chr16	66968258	66968259	FAM96B	51647	60	CGI	TRUE	FALSE	FALSE
cg06202653	chr16	841423	841424	CHTF18	63922	2800	CGI	TRUE	TRUE	FALSE
cg07676361	chr16	80966860	80966861	CENPN	55839	-73241	CGI	FALSE	FALSE	TRUE
cg08251337	chr16	81040389	81040390	CMC2	56942	111	CGI	TRUE	FALSE	FALSE
cg08886020	chr16	1080388	1080389	SSTR5	6755	-42366	CGI	FALSE	FALSE	TRUE
cg08923669	chr16	420230	420231	MRPL28	10573	337	CGI	FALSE	TRUE	FALSE
cg09080920	chr16	928338	928339	PRR25	388199	72894	CGI	FALSE	TRUE	FALSE
cg09104050	chr16	68563912	68563913	ZFP90	146198	-134	CGI	TRUE	FALSE	FALSE
cg09250458	chr16	1139916	1139917	C1QTNF8	390664	6326	CGI	FALSE	TRUE	FALSE
cg09419444	chr16	69958792	69958793	MIR140	406932	-8190	Non-CGI	TRUE	TRUE	FALSE
cg09453103	chr16	1095865	1095866	SSTR5	6755	-26889	CGI	FALSE	FALSE	TRUE
cg09492451	chr16	54967389	54967390	IRX5	10265	2277	CGI	FALSE	TRUE	FALSE
cg09528825	chr16	28074388	28074389	GSG1L	146395	440	CGI	FALSE	TRUE	FALSE
cg09529296	chr16	30960483	30960484	ORAI3	93129	77	CGI	TRUE	FALSE	FALSE
cg10021295	chr16	66731183	66731184	CMTM4	146223	-572	CGI	TRUE	FALSE	FALSE
cg10056854	chr16	22019337	22019338	C16orf52	730094	377	CGI	TRUE	TRUE	FALSE
cg10060191	chr16	66282209	66282210	CDH5	1003	-118314	Non-CGI	FALSE	FALSE	TRUE
cg10123654	chr16	4162541	4162542	ADCY9	115	3643	CGI-N-Shore	FALSE	TRUE	FALSE
cg10450421	chr16	68564110	68564111	ZFP90	146198	61	CGI	TRUE	FALSE	FALSE
cg16660891	chr16	84828913	84828914	CRISPLD2	83716	-24672	CGI	FALSE	FALSE	TRUE
cg16801887	chr16	86541480	86541481	FENDRR	400550	984	CGI	FALSE	TRUE	FALSE
cg19769182	chr16	29823868	29823869	PRRT2	112476	458	CGI	TRUE	TRUE	FALSE
cg26666090	chr16	58549219	58549220	SETD6	79918	-162	CGI	TRUE	FALSE	FALSE
cg26764761	chr16	87682142	87682143	JPH3	57338	46700	CGI	FALSE	TRUE	FALSE
cg26860604	chr16	69958964	69958965	MIR140	406932	-8018	Non-CGI	TRUE	TRUE	FALSE
cg27086442	chr16	15149995	15149996	NTAN1	123803	-161	CGI	TRUE	TRUE	FALSE
cg27172745	chr16	88105698	88105699	BANP	54971	121459	CGI	FALSE	TRUE	FALSE
cg00143364	chr17	78605344	78605345	RPTOR	57521	86718	CGI-N-Shore	FALSE	TRUE	FALSE
cg01186980	chr17	75826713	75826714	FLJ45079	400624	53454	CGI-S-Shore	FALSE	FALSE	TRUE
cg02425140	chr17	259930	259931	C17orf97	400566	-186	CGI	TRUE	FALSE	FALSE
cg03130276	chr17	78161482	78161483	CARD14	79092	17648	CGI	TRUE	TRUE	FALSE
cg04309025	chr17	41476707	41476708	ARL4D	379	353	CGI-S-Shore	TRUE	TRUE	FALSE
cg04498198	chr17	27899966	27899967	TP53I13	90313	4226	CGI	FALSE	TRUE	FALSE
cg04864609	chr17	46178915	46178916	CBX1	10951	-31	CGI	TRUE	FALSE	FALSE
cg05207834	chr17	49199381	49199382	SPAG9	9043	-1154	CGI-S-Shore	TRUE	FALSE	FALSE
cg05332887	chr17	46675072	46675073	HOXB5	3215	-3968	CGI	TRUE	TRUE	FALSE
cg06529477	chr17	56709497	56709498	TEX14	56155	59917	CGI	FALSE	TRUE	FALSE
cg07438617	chr17	46655289	46655290	HOXB4	3214	452	CGI	TRUE	TRUE	FALSE
cg08457011	chr17	2659081	2659082	MIR1253	100302208	-7604	CGI	FALSE	FALSE	TRUE
cg08547691	chr17	9143754	9143755	NTN1	9423	218894	CGI	FALSE	TRUE	FALSE
cg08939850	chr17	78800806	78800807	CHMP6	79643	-164833	CGI	FALSE	TRUE	FALSE
cg09419402	chr17	21187779	21187780	MAP2K3	5606	-187	CGI	TRUE	FALSE	FALSE
cg09999194	chr17	77765305	77765306	CBX8	57332	5608	CGI	FALSE	FALSE	TRUE
cg10689404	chr17	35300645	35300646	AATF	26574	-5528	CGI	FALSE	TRUE	FALSE
cg11252953	chr17	80358829	80358830	HEXDC	284004	-17421	CGI	FALSE	TRUE	FALSE
cg11864309	chr17	53923100	53923101	PCTP	58488	94759	CGI-S-Shore	FALSE	FALSE	TRUE
cg11994674	chr17	47547767	47547768	NGFR	4804	-24886	CGI	FALSE	FALSE	TRUE
cg13213923	chr17	60885491	60885492	MARCH10	162333	212	CGI	TRUE	FALSE	FALSE
cg14126688	chr17	46671497	46671498	HOXB5	3215	-393	CGI	TRUE	TRUE	FALSE
cg14458834	chr17	46655394	46655395	HOXB4	3214	347	CGI	TRUE	TRUE	FALSE
cg15224767	chr17	2496745	2496746	PAFAH1B1	5048	-176	CGI	TRUE	FALSE	FALSE
cg15565065	chr17	46655476	46655477	HOXB4	3214	265	CGI	TRUE	TRUE	FALSE
cg15910686	chr17	78161479	78161480	CARD14	79092	17645	CGI	TRUE	TRUE	FALSE
cg16030119	chr17	46663394	46663395	HOXB3	3213	4235	CGI	FALSE	TRUE	FALSE
cg18434673	chr17	40333360	40333361	KCNH4	23415	-63	CGI	TRUE	FALSE	FALSE
cg19058189	chr17	1958090	1958091	HIC1	3090	641	CGI	TRUE	FALSE	FALSE
cg19079000	chr17	33288590	33288591	ZNF830	91603	40	CGI	TRUE	FALSE	FALSE
cg19188881	chr17	40912968	40912969	RAMP2	10266	-242	CGI	TRUE	FALSE	FALSE
cg19407385	chr17	43099144	43099145	DCAKD	79877	39327	CGI-N-Shore	FALSE	FALSE	TRUE
cg19585061	chr17	259924	259925	C17orf97	400566	-192	CGI	TRUE	FALSE	FALSE
cg19758151	chr17	49008556	49008557	TOB1	10140	-63216	CGI	FALSE	FALSE	TRUE
cg19816930	chr17	58218781	58218782	CA4	762	-8519	CGI	FALSE	FALSE	TRUE
cg20300175	chr17	27918316	27918317	ANKRD13B	124930	1514	CGI	TRUE	TRUE	FALSE
cg20994022	chr17	7197813	7197814	YBX2	51087	61	CGI	TRUE	FALSE	FALSE
cg21546671	chr17	46655387	46655388	HOXB4	3214	354	CGI	TRUE	TRUE	FALSE
cg22163463	chr17	6458640	6458641	PITPNM3	83394	1235	CGI-N-Shore	FALSE	TRUE	FALSE
cg22660147	chr17	46656093	46656094	HOXB4	3214	-349	CGI	TRUE	TRUE	FALSE
cg24140204	chr17	46019184	46019185	PNPO	55163	294	CGI	FALSE	TRUE	FALSE
cg24252287	chr17	40250379	40250380	DHX58	79132	14370	CGI	FALSE	FALSE	TRUE
cg25554283	chr17	63558259	63558260	AXIN2	8313	78922	CGI	TRUE	TRUE	FALSE
cg25587223	chr17	7905928	7905929	GUCY2D	3000	-58	CGI-N-Shore	TRUE	FALSE	FALSE
cg25895971	chr17	77904396	77904397	CBX4	8535	-91182	CGI-S-Shore	FALSE	FALSE	TRUE
cg26053771	chr17	8192194	8192195	RANGRF	29098	224	CGI	FALSE	TRUE	FALSE
cg26539818	chr17	17109691	17109692	FLCN	201163	30809	CGI	TRUE	TRUE	FALSE
cg27249422	chr17	40264678	40264679	DHX58	79132	71	Non-CGI	TRUE	FALSE	FALSE
cg27295781	chr17	16256667	16256668	CENPV	201161	143	CGI	TRUE	FALSE	FALSE
cg27427491	chr17	78079615	78079616	GAA	2548	4259	CGI	FALSE	TRUE	FALSE
cg11696361	chr18	42260979	42260980	SETBP1	26040	840	CGI-S-Shore	TRUE	TRUE	FALSE
cg12924510	chr18	514363	514364	COLEC12	81035	-13633	CGI-S-Shore	FALSE	FALSE	TRUE
cg14185670	chr18	56806716	56806717	SEC11C	90701	-407	CGI	TRUE	FALSE	FALSE
cg17911318	chr18	74962000	74962001	GALR1	2587	-6	CGI	TRUE	FALSE	FALSE
cg19237294	chr18	35065236	35065237	CELF4	56853	80762	CGI	FALSE	TRUE	FALSE
cg19886448	chr18	21269772	21269773	LAMA3	3909	209	CGI	TRUE	FALSE	FALSE
cg20914464	chr18	31803674	31803675	NOL4	8715	-158	CGI	TRUE	FALSE	FALSE
cg21484749	chr18	35146046	35146047	CELF4	56853	-45	CGI	TRUE	FALSE	FALSE
cg22335490	chr18	5544237	5544238	EPB41L3	23136	86403	CGI-S-Shore	TRUE	TRUE	FALSE
cg25772559	chr18	43913719	43913720	RNF165	494470	6945	CGI	TRUE	TRUE	FALSE
cg00503539	chr19	13858870	13858871	CCDC130	81576	16295	CGI	FALSE	TRUE	FALSE
cg01403948	chr19	7661617	7661618	CAMSAP3	57662	828	CGI	FALSE	TRUE	FALSE
cg01875838	chr19	10947446	10947447	TMED1	11018	-462	CGI	TRUE	FALSE	FALSE
cg02298956	chr19	57989134	57989135	ZNF772	400720	-195	CGI	TRUE	FALSE	FALSE
cg02691685	chr19	55851042	55851043	SUV420H2	84787	-177	CGI	TRUE	FALSE	FALSE
cg02935627	chr19	291306	291307	PPAP2C	8612	127	CGI	TRUE	TRUE	FALSE
cg04359527	chr19	7980718	7980719	TGFBR3L	100507588	-312	CGI-N-Shore	TRUE	FALSE	FALSE
cg04583149	chr19	1207124	1207125	STK11	6794	1325	CGI	TRUE	FALSE	FALSE
cg05368740	chr19	36246882	36246883	HSPB6	126393	1046	CGI	TRUE	TRUE	FALSE
cg05891007	chr19	4280361	4280362	SHD	56961	1762	CGI-S-Shore	FALSE	TRUE	FALSE
cg05896042	chr19	11450090	11450091	RAB3D	9545	252	CGI	FALSE	TRUE	FALSE
cg06379435	chr19	3344273	3344274	NFIC	4782	-15286	Non-CGI	FALSE	FALSE	TRUE
cg06882591	chr19	34397628	34397629	KCTD15	79047	109876	CGI	FALSE	FALSE	TRUE
cg07562135	chr19	39340654	39340655	HNRNPL	3191	2323	CGI	TRUE	TRUE	FALSE
cg07789559	chr19	47730030	47730031	MIR3190	100422899	-167	CGI	TRUE	TRUE	FALSE
cg08065231	chr19	9473684	9473685	ZNF177	7730	-10	CGI	TRUE	TRUE	FALSE
cg08371772	chr19	42828621	42828622	MEGF8	1954	-1138	CGI	TRUE	TRUE	FALSE
cg09386265	chr19	1313642	1313643	EFNA2	1943	27488	CGI-S-Shore	FALSE	FALSE	TRUE
cg09429435	chr19	12914994	12914995	PRDX2	7001	-2299	CGI	FALSE	FALSE	TRUE
cg10591771	chr19	3671118	3671119	PIP5K1C	23396	29357	CGI	FALSE	TRUE	FALSE
cg12975330	chr19	53228974	53228975	ZNF611	81856	9331	CGI	FALSE	TRUE	FALSE
cg14224545	chr19	2977617	2977618	TLE6	79816	80	CGI-S-Shore	TRUE	TRUE	FALSE
cg14230238	chr19	6066871	6066872	RFX2	5990	43791	Non-CGI	FALSE	TRUE	FALSE
cg15041373	chr19	39577941	39577942	PAPL	390928	2995	CGI-S-Shelf	FALSE	TRUE	FALSE
cg16624259	chr19	1503341	1503342	ADAMTSL5	339366	9845	CGI	FALSE	FALSE	TRUE
cg16655905	chr19	38755330	38755331	SPINT2	10653	231	CGI	TRUE	FALSE	FALSE
cg16872847	chr19	39893195	39893196	ZFP36	7538	-4290	CGI	FALSE	FALSE	TRUE
cg17700633	chr19	13263997	13263998	IER2	9592	2714	CGI	TRUE	TRUE	FALSE
cg18082014	chr19	46088293	46088294	GPR4	2828	17171	CGI	TRUE	TRUE	FALSE
cg18420266	chr19	19174767	19174768	SLC25A42	284439	-34	CGI	TRUE	FALSE	FALSE
cg18516833	chr19	57350313	57350314	PEG3	5178	1779	CGI	TRUE	TRUE	FALSE
cg19305095	chr19	1495386	1495387	REEP6	92840	4220	CGI	FALSE	TRUE	FALSE
cg20680720	chr19	37407216	37407217	ZNF568	374900	-13	CGI	TRUE	FALSE	FALSE
cg21938523	chr19	16222446	16222447	RAB8A	4218	-42	CGI	TRUE	FALSE	FALSE
cg22083602	chr19	35512707	35512708	SCN1B	6324	-8883	CGI	FALSE	TRUE	FALSE
cg22729335	chr19	2427816	2427817	TIMM13	26517	57	CGI	TRUE	FALSE	FALSE
cg23081925	chr19	38397704	38397705	SIPA1L3	23094	-162	CGI	TRUE	FALSE	FALSE
cg23301142	chr19	50354157	50354158	PTOV1	53635	164	CGI	TRUE	TRUE	FALSE
cg23524709	chr19	4636345	4636346	TNFAIP8L1	126282	-3180	CGI	FALSE	FALSE	TRUE
cg25735398	chr19	2717293	2717294	DIRAS1	148252	4095	CGI	TRUE	TRUE	FALSE
cg25875213	chr19	38183055	38183056	ZNF781	163115	159	CGI	TRUE	FALSE	FALSE
cg26257814	chr19	50553708	50553709	FLJ26850	400710	-227	CGI-N-Shore	TRUE	FALSE	FALSE
cg00539386	chr20	3662512	3662513	ADAM33	80332	224	CGI	FALSE	TRUE	FALSE
cg00845204	chr20	55964273	55964274	RBM38	55544	-2179	CGI-N-Shore	FALSE	TRUE	FALSE
cg01227027	chr20	61430899	61430900	MRGBP	55257	3093	CGI-N-Shore	FALSE	TRUE	FALSE
cg01663968	chr20	57582006	57582007	CTSZ	1522	301	CGI	FALSE	TRUE	FALSE
cg03524572	chr20	62284488	62284489	STMN3	50861	290	CGI	FALSE	TRUE	FALSE
cg03940047	chr20	62120117	62120118	EEF1A2	1917	10386	CGI	FALSE	TRUE	FALSE
cg04048259	chr20	57875346	57875347	EDN3	1908	-151	CGI-N-Shore	TRUE	FALSE	FALSE
cg04718428	chr20	30640512	30640513	HCK	3055	520	CGI	FALSE	TRUE	FALSE
cg06096175	chr20	60701350	60701351	LSM14B	149986	3832	CGI-S-Shelf	FALSE	TRUE	FALSE
cg07217075	chr20	17511826	17511827	BFSP1	631	38037	CGI	TRUE	TRUE	FALSE
cg11059239	chr20	36793726	36793727	TGM2	7052	-25	CGI	TRUE	FALSE	FALSE
cg14275127	chr20	54967374	54967375	AURKA	6790	-22	CGI	TRUE	FALSE	FALSE
cg15028052	chr20	62588587	62588588	UCKL1	54963	-786	CGI	TRUE	TRUE	FALSE
cg15371711	chr20	35169846	35169847	MYL9	10398	-49	CGI	TRUE	TRUE	FALSE
cg16397629	chr20	40093431	40093432	EMILIN3	90187	-97932	Non-CGI	FALSE	TRUE	FALSE
cg16507354	chr20	3869575	3869576	PANK2	80025	88	CGI	TRUE	TRUE	FALSE
cg16822939	chr20	43922174	43922175	RBPJL	11317	-13315	CGI-S-Shore	FALSE	TRUE	FALSE
cg18759209	chr20	55842071	55842072	BMP7	655	-363	CGI	TRUE	FALSE	FALSE
cg22645427	chr20	25129520	25129521	LOC284798	284798	-93	CGI	TRUE	FALSE	FALSE
cg22685975	chr20	51589889	51589890	TSHZ2	128553	942	CGI	FALSE	TRUE	FALSE
cg22853588	chr20	35169881	35169882	MYL9	10398	-14	CGI	TRUE	TRUE	FALSE
cg23582408	chr20	62130111	62130112	EEF1A2	1917	392	CGI-S-Shore	FALSE	TRUE	FALSE
cg24642439	chr20	33292090	33292091	TP53INP2	58476	-56	CGI	TRUE	FALSE	FALSE
cg24924779	chr20	49639998	49639999	KCNG1	3755	-322	CGI	TRUE	FALSE	FALSE
cg25505887	chr20	60545044	60545045	MIR1257	100302168	-16325	CGI	FALSE	FALSE	TRUE
cg25575688	chr20	305917	305918	SOX12	6666	-320	CGI	TRUE	FALSE	FALSE
cg26287345	chr20	35169886	35169887	MYL9	10398	-9	CGI	TRUE	TRUE	FALSE
cg14172108	chr21	34405553	34405554	OLIG2	10215	7336	CGI-N-Shore	FALSE	FALSE	TRUE
cg16719517	chr21	37442385	37442386	CBR1	873	99	CGI	TRUE	TRUE	FALSE
cg18349138	chr21	19617138	19617139	TMPRSS15	5651	158830	CGI	TRUE	TRUE	FALSE
cg27263741	chr21	43099365	43099366	LINC00111	54090	-95	CGI-N-Shelf	TRUE	FALSE	FALSE
cg27307781	chr21	37442289	37442290	CBR1	873	3	CGI	TRUE	TRUE	FALSE
cg00393435	chr22	39052596	39052597	FAM227A	646851	36	CGI	TRUE	FALSE	FALSE
cg03957481	chr22	50986962	50986963	KLHDC7B	113730	499	CGI	TRUE	FALSE	FALSE
cg06008724	chr22	45403507	45403508	PHF21B	112885	2300	CGI	FALSE	TRUE	FALSE
cg06845706	chr22	23733812	23733813	CES5AP1	649264	-9498	CGI-S-Shelf	FALSE	TRUE	FALSE
cg07264792	chr22	38054590	38054591	PDXP	57026	-145	CGI	TRUE	TRUE	FALSE
cg07312514	chr22	29711918	29711919	RASL10A	10633	-169	CGI	TRUE	FALSE	FALSE
cg08075329	chr22	42016431	42016432	DESI1	27351	628	CGI	TRUE	TRUE	FALSE
cg10455938	chr22	40058150	40058151	CACNA1I	8911	91391	CGI	FALSE	TRUE	FALSE
cg12232731	chr22	46451518	46451519	C22orf26	55267	-1493	CGI-S-Shore	TRUE	TRUE	FALSE
cg12511214	chr22	40058293	40058294	CACNA1I	8911	91534	CGI	FALSE	TRUE	FALSE
cg16981421	chr22	50529071	50529072	MOV10L1	54456	635	CGI	FALSE	TRUE	FALSE
cg17511741	chr22	51039434	51039435	MAPK8IP2	23542	302	CGI	FALSE	TRUE	FALSE
cg21625563	chr22	39152448	39152449	DNAL4	10126	37711	CGI-S-Shore	TRUE	TRUE	FALSE
cg21776003	chr22	24115096	24115097	MMP11	4320	59	CGI	TRUE	FALSE	FALSE
cg21874829	chr22	38808815	38808816	LOC400927	400927	-13883	CGI	FALSE	FALSE	TRUE
cg23327483	chr22	24110105	24110106	CHCHD10	400916	34	CGI	TRUE	FALSE	FALSE
cg27424226	chr22	38201142	38201143	H1F0	3005	27	CGI	TRUE	FALSE	FALSE
cg00282347	chr1	6241040	6241041	CHD5	26038	-845	CGI	TRUE	FALSE	FALSE
cg00505133	chr1	95320459	95320460	SLC44A3	126969	34557	Non-CGI	FALSE	TRUE	FALSE
cg00669623	chr1	1655867	1655868	CDK11A	728642	-75	CGI	TRUE	TRUE	FALSE
cg00714888	chr1	17287670	17287671	MFAP2	4237	20409	CGI-S-Shore	FALSE	TRUE	FALSE
cg00765655	chr1	6304199	6304200	HES3	390992	-51	CGI-S-Shore	TRUE	FALSE	FALSE
cg00923744	chr1	230204526	230204527	GALNT2	2590	10989	CGI-S-Shore	FALSE	TRUE	FALSE
cg00961792	chr1	207120407	207120408	PIGR	5284	-595	Non-CGI	TRUE	FALSE	FALSE
cg01001098	chr1	47691601	47691602	TAL1	6886	6289	CGI	TRUE	TRUE	FALSE
cg01620569	chr1	33502810	33502811	AK2	204	-297	CGI-S-Shore	TRUE	FALSE	FALSE
cg01715025	chr1	145683323	145683324	CD160	11126	32240	Non-CGI	FALSE	TRUE	FALSE
cg01718365	chr1	23345643	23345644	KDM1A	23028	-296	CGI-N-Shore	TRUE	FALSE	FALSE
cg01791104	chr1	27113753	27113754	PIGV	55650	-699	CGI-N-Shore	TRUE	FALSE	FALSE
cg02069772	chr1	154929317	154929318	PBXIP1	57326	-749	Non-CGI	TRUE	FALSE	FALSE
cg02070740	chr1	146763914	146763915	CHD1L	9557	49622	Non-CGI	FALSE	TRUE	FALSE
cg02191044	chr1	232940990	232940991	MAP10	54627	351	CGI-N-Shore	TRUE	FALSE	FALSE
cg02284814	chr1	202408140	202408141	PPP1R12B	4660	90309	CGI	FALSE	TRUE	FALSE
cg02421543	chr1	93810826	93810827	LOC100131564	100131564	540	CGI-N-Shore	TRUE	TRUE	FALSE
cg02486904	chr1	47999051	47999052	FOXD2	2306	97361	CGI	FALSE	FALSE	TRUE
cg02555074	chr1	27319884	27319885	TRNP1	388610	-309	CGI	TRUE	TRUE	FALSE
cg02635260	chr1	222988117	222988118	DISP1	84976	-312	CGI-N-Shore	TRUE	FALSE	FALSE
cg02763800	chr1	181287301	181287302	CACNA1E	777	-165383	CGI	FALSE	FALSE	TRUE
cg02814998	chr1	226926791	226926792	ITPKB	3707	83	CGI	TRUE	FALSE	FALSE
cg02902865	chr1	12679132	12679133	DHRS3	9249	-1311	CGI	TRUE	FALSE	FALSE
cg02974085	chr1	222990921	222990922	DISP1	84976	2489	CGI-S-Shelf	FALSE	TRUE	FALSE
cg03000585	chr1	78355339	78355340	NEXN	91624	1138	CGI-S-Shore	FALSE	TRUE	FALSE
cg03050965	chr1	101705237	101705238	S1PR1	1901	2931	CGI	TRUE	TRUE	FALSE
cg03442467	chr1	66797701	66797702	SGIP1	84251	-202122	Non-CGI	TRUE	TRUE	FALSE
cg03724010	chr1	1473443	1473444	TMEM240	339453	2295	CGI	FALSE	TRUE	FALSE
cg03818307	chr1	150480534	150480535	ECM1	1893	46	Non-CGI	TRUE	FALSE	FALSE
cg04055049	chr1	6321553	6321554	GPR153	387509	-517	CGI	TRUE	FALSE	FALSE
cg04113693	chr1	156890488	156890489	LRRC71	149499	63	CGI	TRUE	FALSE	FALSE
cg04215950	chr1	7125137	7125138	CAMTA1	23261	279752	CGI-S-Shore	FALSE	TRUE	FALSE
cg04243582	chr1	1655942	1655943	CDK11A	728642	-150	CGI	TRUE	TRUE	FALSE
cg04360147	chr1	27021709	27021710	ARID1A	8289	-811	CGI-S-Shore	TRUE	FALSE	FALSE
cg04567445	chr1	65730409	65730410	DNAJC6	9829	10260	CGI-N-Shore	TRUE	TRUE	FALSE
cg05376756	chr1	101493828	101493829	DPH5	51611	-2183	CGI-S-Shelf	FALSE	TRUE	FALSE
cg05654164	chr1	85725892	85725893	C1orf52	148423	-536	CGI-S-Shore	TRUE	FALSE	FALSE
cg05762488	chr1	64140332	64140333	PGM1	5236	81384	Non-CGI	FALSE	FALSE	TRUE
cg05776630	chr1	20015027	20015028	HTR6	3362	23246	Non-CGI	FALSE	TRUE	FALSE
cg05888707	chr1	118475999	118476000	WDR3	10885	3626	CGI-S-Shelf	TRUE	TRUE	FALSE
cg05959508	chr1	209929512	209929513	TRAF3IP3	80342	117	Non-CGI	TRUE	FALSE	FALSE
cg06239526	chr1	153747609	153747610	SLC27A3	11000	-157	CGI-N-Shore	TRUE	FALSE	FALSE
cg06393286	chr1	20879644	20879645	FAM43B	163933	711	CGI	TRUE	FALSE	FALSE
cg06544731	chr1	24738219	24738220	STPG1	90529	3366	CGI-N-Shore	FALSE	TRUE	FALSE
cg06758477	chr1	10240771	10240772	KIF1B	23095	-29991	Non-CGI	FALSE	TRUE	FALSE
cg06793307	chr1	1455374	1455375	ATAD3A	55210	7850	CGI	FALSE	TRUE	FALSE
cg06793600	chr1	42127247	42127248	EDN2	1907	-176902	CGI-N-Shore	FALSE	TRUE	FALSE
cg06926146	chr1	170629502	170629503	PRRX1	5396	-3809	CGI	FALSE	FALSE	TRUE
cg06981504	chr1	1234844	1234845	PUSL1	126789	-9148	CGI-S-Shore	TRUE	TRUE	FALSE
cg06989739	chr1	235709461	235709462	B3GALNT2	148789	-41679	Non-CGI	FALSE	FALSE	TRUE
cg07154958	chr1	95582416	95582417	TMEM56-RWDD3	100527978	-1061	CGI-N-Shore	TRUE	TRUE	FALSE
cg07476963	chr1	174127462	174127463	RABGAP1L	9910	-1088	CGI-N-Shore	TRUE	FALSE	FALSE
cg07820280	chr1	6532571	6532572	TNFRSF25	8718	-6315	CGI-S-Shore	TRUE	TRUE	FALSE
cg07978029	chr1	31316789	31316790	SDC3	9672	64689	Non-CGI	FALSE	FALSE	TRUE
cg08029299	chr1	201531514	201531515	RPS10P7	376693	42481	Non-CGI	FALSE	FALSE	TRUE
cg08541862	chr1	43829524	43829525	ELOVL1	64834	4173	CGI-N-Shelf	FALSE	TRUE	FALSE
cg08625289	chr1	59612492	59612493	HSD52	729467	-12	CGI	TRUE	FALSE	FALSE
cg08654262	chr1	85796055	85796056	BCL10	8915	-53467	Non-CGI	FALSE	TRUE	FALSE
cg08897924	chr1	52832660	52832661	CC2D1B	200014	-782	CGI-S-Shore	TRUE	FALSE	FALSE
cg08925398	chr1	202937011	202937012	CYB5R1	51706	-606	CGI-S-Shore	TRUE	FALSE	FALSE
cg09044743	chr1	2458238	2458239	PANK4	55229	-202	CGI	TRUE	FALSE	FALSE
cg09370016	chr1	100193837	100193838	FRRS1	391059	37510	Non-CGI	FALSE	TRUE	FALSE
cg09866757	chr1	91180334	91180335	BARHL2	343472	2458	CGI-N-Shore	FALSE	TRUE	FALSE
cg09871079	chr1	33359180	33359181	HPCA	3208	7081	CGI	FALSE	TRUE	FALSE
cg09922481	chr1	168698463	168698464	DPT	1805	-20	Non-CGI	TRUE	FALSE	FALSE
cg09942999	chr1	32707389	32707390	MTMR9LP	339483	-77	CGI-S-Shore	TRUE	FALSE	FALSE
cg09958801	chr1	154974950	154974951	ZBTB7B	51043	-154	CGI-S-Shore	TRUE	FALSE	FALSE
cg10027314	chr1	113064520	113064521	WNT2B	7482	54479	Non-CGI	FALSE	FALSE	TRUE
cg10061532	chr1	201886748	201886749	SHISA4	149345	28950	Non-CGI	FALSE	TRUE	FALSE
cg10098670	chr1	200299925	200299926	LINC00862	554279	42993	Non-CGI	FALSE	FALSE	TRUE
cg10402471	chr1	200377740	200377741	ZNF281	23528	1424	CGI-N-Shore	TRUE	TRUE	FALSE
cg10663017	chr1	159750305	159750306	DUSP23	54935	-452	CGI-N-Shore	TRUE	FALSE	FALSE
cg10712476	chr1	95163986	95163987	SLC44A3	126969	-121913	Non-CGI	FALSE	TRUE	FALSE
cg10985914	chr1	212769641	212769642	FAM71A	149647	-28146	Non-CGI	FALSE	TRUE	FALSE
cg10989261	chr1	6844145	6844146	CAMTA1	23261	-1237	CGI-N-Shore	TRUE	FALSE	FALSE
cg10989897	chr1	50513645	50513646	ELAVL4	1996	-39	CGI-N-Shore	TRUE	FALSE	FALSE
cg11208880	chr1	90287278	90287279	LRRC8D	55144	704	CGI	TRUE	TRUE	FALSE
cg11296230	chr1	29450836	29450837	TMEM200B	399474	-414	CGI	TRUE	FALSE	FALSE
cg11855555	chr1	68232134	68232135	GNG12-AS1	100289178	-65835	Non-CGI	FALSE	TRUE	FALSE
cg11952714	chr1	99126623	99126624	SNX7	51375	-611	CGI-N-Shore	TRUE	FALSE	FALSE
cg11960592	chr1	63154584	63154585	DOCK7	85440	-614	CGI-S-Shore	TRUE	FALSE	FALSE
cg12046375	chr1	150459886	150459887	TARS2	80222	-32	CGI	TRUE	FALSE	FALSE
cg12054080	chr1	220446043	220446044	RAB3GAP2	25782	-199	CGI	TRUE	FALSE	FALSE
cg12083024	chr1	3746511	3746512	CEP104	9731	27284	CGI	FALSE	TRUE	FALSE
cg12085314	chr1	94511426	94511427	ABCA4	24	75277	Non-CGI	FALSE	TRUE	FALSE
cg12425768	chr1	10269828	10269829	KIF1B	23095	-934	CGI-N-Shore	TRUE	FALSE	FALSE
cg12437148	chr1	236559305	236559306	EDARADD	128178	1624	CGI	FALSE	TRUE	FALSE
cg12473000	chr1	31196412	31196413	MATN1	4146	18	CGI-S-Shore	TRUE	TRUE	FALSE
cg12641660	chr1	117602129	117602130	TTF2	8458	-818	CGI	TRUE	FALSE	FALSE
cg12702354	chr1	77043128	77043129	ST6GALNAC5	81849	-290056	Non-CGI	FALSE	TRUE	FALSE
cg13132121	chr1	218653561	218653562	TGFB2	7042	134884	Non-CGI	FALSE	FALSE	TRUE
cg13175981	chr1	150552382	150552383	MCL1	4170	-167	CGI-S-Shore	TRUE	FALSE	FALSE
cg13866577	chr1	66797481	66797482	SGIP1	84251	-202342	Non-CGI	TRUE	TRUE	FALSE
cg13917151	chr1	27730185	27730186	GPR3	2827	11032	CGI	FALSE	FALSE	TRUE
cg14078231	chr1	15850601	15850602	CASP9	842	682	CGI	TRUE	TRUE	FALSE
cg14096207	chr1	223407010	223407011	TLR5	7100	-90385	Non-CGI	FALSE	TRUE	FALSE
cg14220777	chr1	20062329	20062330	TMCO4	255104	64427	Non-CGI	FALSE	TRUE	FALSE
cg14404418	chr1	85085337	85085338	C1orf180	439927	15364	CGI-N-Shore	FALSE	FALSE	TRUE
cg14453641	chr1	100315326	100315327	AGL	178	-312	CGI-N-Shore	TRUE	FALSE	FALSE
cg14528147	chr1	113001201	113001202	MIR4256	100422976	3252	Non-CGI	FALSE	TRUE	FALSE
cg14654495	chr1	204966338	204966339	CNTN2	6900	-45725	CGI	TRUE	TRUE	FALSE
cg14986357	chr1	44888866	44888867	RNF220	55182	17905	Non-CGI	TRUE	TRUE	FALSE
cg15166311	chr1	178007283	178007284	LOC730102	730102	-140	CGI	TRUE	FALSE	FALSE
cg15645961	chr1	52452113	52452114	RAB3B	5865	4321	CGI-N-Shelf	FALSE	TRUE	FALSE
cg15676719	chr1	167598521	167598522	RCSD1	92241	-951	CGI-N-Shore	TRUE	FALSE	FALSE
cg15991082	chr1	85872804	85872805	BCL10	8915	-130216	Non-CGI	FALSE	TRUE	FALSE
cg16107483	chr1	28199456	28199457	THEMIS2	9473	400	CGI	FALSE	TRUE	FALSE
cg16107628	chr1	159894061	159894062	TAGLN2	8407	1221	CGI-N-Shore	FALSE	TRUE	FALSE
cg16265859	chr1	19401069	19401070	IFFO2	126917	-118242	CGI-N-Shelf	TRUE	TRUE	FALSE
cg16619193	chr1	206643301	206643302	IKBKE	9641	-283	Non-CGI	TRUE	FALSE	FALSE
cg16691196	chr1	20508651	20508652	UBXN10	127733	-3925	CGI-N-Shelf	FALSE	FALSE	TRUE
cg16737215	chr1	95582666	95582667	TMEM56-RWDD3	100527978	-811	CGI	TRUE	TRUE	FALSE
cg16829306	chr1	21671508	21671509	ECE1	1889	524	CGI	FALSE	TRUE	FALSE
cg16907075	chr1	156022875	156022876	UBQLN4	56893	639	CGI-N-Shore	TRUE	TRUE	FALSE
cg17095728	chr1	231297516	231297517	TRIM67	440730	-1156	CGI	TRUE	FALSE	FALSE
cg17165580	chr1	156676581	156676582	CRABP2	1382	-972	CGI	TRUE	FALSE	FALSE
cg17355239	chr1	15736135	15736136	EFHD2	79180	-254	CGI	TRUE	FALSE	FALSE
cg17589124	chr1	6546732	6546733	TNFRSF25	8718	-20476	CGI-S-Shore	TRUE	TRUE	FALSE
cg17885806	chr1	165414491	165414492	RXRG	6258	99	CGI	TRUE	FALSE	FALSE
cg18148314	chr1	6425319	6425320	ACOT7	11332	28505	Non-CGI	FALSE	TRUE	FALSE
cg18923740	chr1	19971790	19971791	NBL1	4681	2066	CGI	TRUE	TRUE	FALSE
cg19526130	chr1	59612408	59612409	HSD52	729467	69	CGI-N-Shore	TRUE	FALSE	FALSE
cg19662687	chr1	161337679	161337680	C1orf192	257177	-14	Non-CGI	TRUE	FALSE	FALSE
cg19766609	chr1	67520234	67520235	SLC35D1	23169	-153	CGI-S-Shore	TRUE	FALSE	FALSE
cg19939130	chr1	158978468	158978469	IFI16	3428	8709	Non-CGI	TRUE	TRUE	FALSE
cg20283477	chr1	20693333	20693334	LOC339505	339505	61952	CGI-S-Shore	FALSE	TRUE	FALSE
cg20300776	chr1	88433987	88433988	LOC100505768	100505768	-596648	Non-CGI	FALSE	FALSE	TRUE
cg20944548	chr1	110214317	110214318	GSTM2	2946	15618	CGI-S-Shelf	FALSE	TRUE	FALSE
cg20996887	chr1	246136645	246136646	SMYD3	64754	533997	CGI-N-Shore	FALSE	TRUE	FALSE
cg21108215	chr1	183791720	183791721	APOBEC4	403314	-169271	Non-CGI	FALSE	TRUE	FALSE
cg21109518	chr1	43819313	43819314	CDC20	991	-5311	Non-CGI	FALSE	TRUE	FALSE
cg21205392	chr1	151035398	151035399	MLLT11	10962	3246	CGI-S-Shelf	FALSE	TRUE	FALSE
cg21266845	chr1	168698479	168698480	DPT	1805	-36	Non-CGI	TRUE	FALSE	FALSE
cg21268984	chr1	8720599	8720600	RERE	473	157098	Non-CGI	FALSE	TRUE	FALSE
cg21410100	chr1	19745731	19745732	CAPZB	832	66333	Non-CGI	FALSE	TRUE	FALSE
cg21578869	chr1	33841931	33841932	MIR3605	100500853	-43837	Non-CGI	TRUE	TRUE	FALSE
cg21601498	chr1	16678847	16678848	FBXO42	54455	99	CGI	TRUE	FALSE	FALSE
cg21647227	chr1	119527111	119527112	TBX15	6913	5066	CGI	FALSE	TRUE	FALSE
cg22007666	chr1	216896852	216896853	USH2A	7399	-300113	CGI-N-Shore	TRUE	TRUE	FALSE
cg22050733	chr1	17287205	17287206	MFAP2	4237	20874	CGI-N-Shore	FALSE	TRUE	FALSE
cg22336004	chr1	66258035	66258036	PDE4B	5142	-156	CGI	TRUE	FALSE	FALSE
cg22437405	chr1	38000170	38000171	SNIP1	79753	19731	Non-CGI	FALSE	FALSE	TRUE
cg22698489	chr1	159893696	159893697	TAGLN2	8407	1586	CGI-N-Shore	FALSE	TRUE	FALSE
cg22809683	chr1	182998916	182998917	LAMC1	3915	6320	Non-CGI	FALSE	TRUE	FALSE
cg23022778	chr1	236246704	236246705	NID1	4811	-18222	Non-CGI	FALSE	FALSE	TRUE
cg23037321	chr1	181003203	181003204	MR1	3140	641	Non-CGI	TRUE	TRUE	FALSE
cg23084506	chr1	13111908	13111909	PRAMEF5	343068	5841	Non-CGI	FALSE	TRUE	FALSE
cg23213217	chr1	224370155	224370156	DEGS1	8560	-753	CGI-N-Shore	TRUE	FALSE	FALSE
cg23591803	chr1	211816097	211816098	NEK2	4751	32873	Non-CGI	FALSE	FALSE	TRUE
cg24402067	chr1	41828101	41828102	SCMH1	22955	-120285	CGI	FALSE	FALSE	TRUE
cg24692177	chr1	86045936	86045937	CYR61	3491	-506	CGI	TRUE	FALSE	FALSE
cg25346122	chr1	198125440	198125441	NEK7	140609	-666	CGI-N-Shore	TRUE	FALSE	FALSE
cg25467652	chr1	11795976	11795977	AGTRAP	57085	-164	CGI-N-Shore	TRUE	FALSE	FALSE
cg25737788	chr1	15852955	15852956	DNAJC16	23341	-395	CGI	TRUE	FALSE	FALSE
cg26010028	chr1	178653297	178653298	MIR4424	100616328	6412	Non-CGI	FALSE	FALSE	TRUE
cg26554170	chr1	227968812	227968813	PRSS38	339501	-34604	Non-CGI	FALSE	TRUE	FALSE
cg26690474	chr1	53792921	53792922	LRP8	7804	898	CGI	TRUE	TRUE	FALSE
cg26815229	chr1	60392933	60392934	CYP2J2	1573	-509	CGI-S-Shore	TRUE	FALSE	FALSE
cg27310092	chr1	151945663	151945664	S100A10	6281	21049	Non-CGI	FALSE	FALSE	TRUE
cg27519691	chr1	77333074	77333075	ST6GALNAC5	81849	-110	CGI	TRUE	FALSE	FALSE
cg27563952	chr1	182557982	182557983	RNASEL	6041	410	Non-CGI	TRUE	TRUE	FALSE
ch.1.658177R	chr1	19489354	19489356	UBR4	23352	47389	Non-CGI	FALSE	TRUE	FALSE
ch.1.2890885R	chr1	150319305	150319307	RPRD2	23248	-17682	Non-CGI	FALSE	TRUE	FALSE
ch.1.180997836R	chr1	182731213	182731215	NPL	80896	-27368	Non-CGI	FALSE	FALSE	TRUE
cg00219921	chr2	87012810	87012811	CD8A	925	22707	CGI-N-Shelf	FALSE	TRUE	FALSE
cg00238468	chr2	128049602	128049603	ERCC3	2071	2148	CGI-N-Shore	TRUE	TRUE	FALSE
cg00486564	chr2	73151879	73151880	EMX1	2016	7274	CGI	FALSE	TRUE	FALSE
cg00775119	chr2	153406036	153406037	PRPF40A	55660	167937	Non-CGI	FALSE	TRUE	FALSE
cg00968638	chr2	43450965	43450966	ZFP36L2	678	2778	CGI-N-Shore	FALSE	TRUE	FALSE
cg00999904	chr2	3704751	3704752	ALLC	55821	-1033	CGI	TRUE	FALSE	FALSE
cg01098288	chr2	101179325	101179326	PDCL3	79031	-91	CGI	TRUE	FALSE	FALSE
cg01247454	chr2	190028935	190028936	COL5A2	1290	15668	Non-CGI	FALSE	TRUE	FALSE
cg01413880	chr2	216734826	216734827	LINC00607	646324	-26566	Non-CGI	FALSE	FALSE	TRUE
cg01418256	chr2	137523892	137523893	THSD7B	80731	776	CGI	FALSE	TRUE	FALSE
cg01620617	chr2	71128293	71128294	VAX2	25806	572	CGI	FALSE	TRUE	FALSE
cg01869273	chr2	112656949	112656950	MERTK	10461	757	CGI-S-Shore	FALSE	TRUE	FALSE
cg02543249	chr2	176867176	176867177	KIAA1715	80856	336	CGI	TRUE	TRUE	FALSE
cg02561014	chr2	164466724	164466725	FIGN	55137	125787	CGI	FALSE	TRUE	FALSE
cg02652597	chr2	85811292	85811293	VAMP5	10791	-237	CGI-N-Shore	TRUE	FALSE	FALSE
cg02879423	chr2	224806760	224806761	WDFY1	57590	3290	CGI-N-Shelf	FALSE	TRUE	FALSE
cg02888838	chr2	128459936	128459937	SFT2D3	84826	1338	CGI	TRUE	FALSE	FALSE
cg02916472	chr2	218151983	218151984	TNP1	7141	-427200	Non-CGI	FALSE	TRUE	FALSE
cg02965295	chr2	197944718	197944719	PGAP1	80055	-152198	Non-CGI	FALSE	TRUE	FALSE
cg03034696	chr2	47400023	47400024	C2orf61	285051	3715	CGI-N-Shelf	FALSE	TRUE	FALSE
cg03092930	chr2	132586330	132586331	C2orf27B	408029	-27095	CGI	FALSE	FALSE	TRUE
cg03145301	chr2	232527776	232527777	PTMA	5757	-45457	CGI	FALSE	FALSE	TRUE
cg03303515	chr2	47213998	47213999	MCFD2	90411	-45003	Non-CGI	FALSE	TRUE	FALSE
cg03641300	chr2	160917029	160917030	PLA2R1	22925	2095	CGI-N-Shore	FALSE	TRUE	FALSE
cg03888447	chr2	36607424	36607425	CRIM1	51232	24053	Non-CGI	FALSE	TRUE	FALSE
cg03989068	chr2	42106106	42106107	LOC388942	388942	1410	Non-CGI	FALSE	TRUE	FALSE
cg04133502	chr2	218058686	218058687	TNP1	7141	-333903	Non-CGI	FALSE	FALSE	TRUE
cg04423209	chr2	85663660	85663661	SH2D6	284948	17605	CGI-N-Shore	FALSE	TRUE	FALSE
cg04690395	chr2	19558507	19558508	OSR1	130497	-134	CGI	TRUE	FALSE	FALSE
cg04781648	chr2	27526436	27526437	UCN	7349	4692	CGI-N-Shelf	FALSE	TRUE	FALSE
cg05166976	chr2	242842459	242842460	CXXC11	285093	30572	CGI-S-Shore	FALSE	FALSE	TRUE
cg05208400	chr2	227538347	227538348	IRS1	3667	125157	Non-CGI	FALSE	FALSE	TRUE
cg05217331	chr2	231190414	231190415	SP140L	93349	-1478	Non-CGI	TRUE	TRUE	FALSE
cg05418915	chr2	196426178	196426179	SLC39A10	57181	-95352	Non-CGI	FALSE	FALSE	TRUE
cg06046912	chr2	55747633	55747634	CCDC104	112942	892	CGI	FALSE	TRUE	FALSE
cg06131211	chr2	36647539	36647540	CRIM1	51232	64168	Non-CGI	FALSE	TRUE	FALSE
cg06509239	chr2	19558569	19558570	OSR1	130497	-196	CGI	TRUE	FALSE	FALSE
cg06970082	chr2	15782968	15782969	DDX1	1653	51197	Non-CGI	FALSE	FALSE	TRUE
cg07065759	chr2	198017462	198017463	ANKRD44	91526	158057	Non-CGI	FALSE	TRUE	FALSE
cg07201475	chr2	151768348	151768349	RBM43	375287	350039	Non-CGI	FALSE	FALSE	TRUE
cg07800384	chr2	289254	289255	FAM150B	285016	-945	CGI-S-Shore	TRUE	FALSE	FALSE
cg07927396	chr2	10972660	10972661	PDIA6	10130	5441	CGI-S-Shore	TRUE	TRUE	FALSE
cg08160937	chr2	68698676	68698677	APLF	200558	3984	CGI-S-Shelf	FALSE	TRUE	FALSE
cg08206881	chr2	12317357	12317358	MIR4262	100422996	-340244	Non-CGI	FALSE	TRUE	FALSE
cg08312198	chr2	235961352	235961353	SH3BP4	23677	100723	CGI-N-Shore	FALSE	TRUE	FALSE
cg08515841	chr2	208029740	208029741	KLF7	8609	1829	CGI-N-Shore	FALSE	TRUE	FALSE
cg08729839	chr2	75059030	75059031	HK2	3099	-750	CGI-N-Shore	TRUE	FALSE	FALSE
cg08818866	chr2	33415906	33415907	LTBP1	4052	243536	Non-CGI	FALSE	TRUE	FALSE
cg08970020	chr2	64216731	64216732	VPS54	51542	29481	CGI	FALSE	TRUE	FALSE
cg09174690	chr2	121107018	121107019	INHBB	3625	3298	CGI	FALSE	TRUE	FALSE
cg09560533	chr2	241776193	241776194	KIF1A	547	-16467	CGI-S-Shelf	FALSE	FALSE	TRUE
cg09618309	chr2	99908962	99908963	LYG1	129530	12254	Non-CGI	FALSE	TRUE	FALSE
cg09669874	chr2	24836601	24836602	NCOA1	8648	49421	Non-CGI	FALSE	TRUE	FALSE
cg09672570	chr2	131810074	131810075	FAM168B	130074	40928	Non-CGI	FALSE	TRUE	FALSE
cg10504150	chr2	242749927	242749928	NEU4	129807	-231	CGI	TRUE	TRUE	FALSE
cg11324054	chr2	36825448	36825449	FEZ2	9637	-115	CGI-S-Shore	TRUE	FALSE	FALSE
cg11380108	chr2	75835911	75835912	MRPL19	9801	-37996	Non-CGI	FALSE	FALSE	TRUE
cg11495753	chr2	30006577	30006578	ALK	238	137898	Non-CGI	FALSE	TRUE	FALSE
cg11695601	chr2	175870435	175870436	CHN1	1123	-327	CGI-S-Shore	TRUE	FALSE	FALSE
cg11765003	chr2	220024730	220024731	SLC23A3	151295	10085	CGI-N-Shore	FALSE	TRUE	FALSE
cg12088387	chr2	237476950	237476951	CXCR7	57007	7525	CGI	TRUE	TRUE	FALSE
cg12323894	chr2	120124007	120124008	C2orf76	130355	395	CGI-N-Shore	TRUE	TRUE	FALSE
cg12341429	chr2	161887154	161887155	TANK	10010	-106310	Non-CGI	FALSE	FALSE	TRUE
cg12407784	chr2	29469976	29469977	CLIP4	79745	149404	Non-CGI	FALSE	TRUE	FALSE
cg12440105	chr2	239756128	239756129	TWIST2	117581	-543	CGI	TRUE	FALSE	FALSE
cg12666279	chr2	115918745	115918746	LOC389023	389023	173	CGI	TRUE	TRUE	FALSE
cg13355704	chr2	69968414	69968415	ANXA4	307	-711	CGI	TRUE	FALSE	FALSE
cg13368983	chr2	201995729	201995730	CFLAR	8837	14851	Non-CGI	TRUE	TRUE	FALSE
cg13436799	chr2	170218997	170218998	LRP2	4036	123	CGI	TRUE	FALSE	FALSE
cg13622261	chr2	220223201	220223202	RESP18	389075	-25301	CGI	FALSE	FALSE	TRUE
cg14211387	chr2	201677426	201677427	BZW1	9689	1156	CGI	FALSE	TRUE	FALSE
cg14342532	chr2	233916534	233916535	INPP5D	3635	-8500	Non-CGI	FALSE	FALSE	TRUE
cg14566801	chr2	209225123	209225124	PTH2R	5746	553	CGI	FALSE	TRUE	FALSE
cg14620184	chr2	29941470	29941471	ALK	238	203005	Non-CGI	FALSE	TRUE	FALSE
cg14928278	chr2	242611829	242611830	DTYMK	1841	14552	CGI	TRUE	TRUE	FALSE
cg15021525	chr2	103353676	103353677	TMEM182	130827	281	CGI-S-Shore	TRUE	TRUE	FALSE
cg15312261	chr2	180886778	180886779	CWC22	57703	-14937	CGI	FALSE	FALSE	TRUE
cg15350455	chr2	24270357	24270358	C2orf44	80304	-60	CGI	TRUE	FALSE	FALSE
cg15352315	chr2	160655036	160655037	CD302	9936	-269	CGI-S-Shore	TRUE	TRUE	FALSE
cg15555875	chr2	70057653	70057654	GMCL1	64395	834	CGI-S-Shore	FALSE	TRUE	FALSE
cg15656310	chr2	85843042	85843043	C2orf68	388969	-3862	CGI-N-Shore	TRUE	TRUE	FALSE
cg16096063	chr2	236720238	236720239	AGAP1	116987	317504	CGI-N-Shore	FALSE	TRUE	FALSE
cg16233797	chr2	20001490	20001491	FLJ12334	400946	-67123	Non-CGI	FALSE	FALSE	TRUE
cg16416261	chr2	37424104	37424105	LOC100505876	100505876	468	CGI	TRUE	TRUE	FALSE
cg16719560	chr2	85811421	85811422	VAMP5	10791	-108	CGI-N-Shore	TRUE	FALSE	FALSE
cg16750177	chr2	238839557	238839558	UBE2F-SCLY	100533179	-36028	Non-CGI	FALSE	FALSE	TRUE
cg16762595	chr2	8285209	8285210	LOC339788	339788	-168231	Non-CGI	FALSE	TRUE	FALSE
cg16844875	chr2	237476791	237476792	CXCR7	57007	7366	CGI	TRUE	TRUE	FALSE
cg17576375	chr2	105924659	105924660	TGFBRAP1	9392	21487	CGI	FALSE	TRUE	FALSE
cg17654419	chr2	102012904	102012905	CREG2	200407	-8938	Non-CGI	FALSE	FALSE	TRUE
cg18013012	chr2	220119233	220119234	TUBA4A	7277	95	CGI	TRUE	TRUE	FALSE
cg18070033	chr2	220025364	220025365	SLC23A3	151295	9451	CGI	FALSE	TRUE	FALSE
cg18091167	chr2	113952510	113952511	PSD4	23550	20949	CGI-N-Shelf	FALSE	TRUE	FALSE
cg18257574	chr2	43358343	43358344	ZFP36L2	678	95400	Non-CGI	FALSE	FALSE	TRUE
cg19003183	chr2	205994737	205994738	NRP2	8828	-552485	Non-CGI	FALSE	TRUE	FALSE
cg19067791	chr2	166809971	166809972	TTC21B	79809	375	CGI-N-Shore	FALSE	TRUE	FALSE
cg19197236	chr2	242698845	242698846	GAL3ST2	64090	-17393	CGI	FALSE	TRUE	FALSE
cg19364957	chr2	27579796	27579797	GTF3C2	2976	70	CGI	TRUE	FALSE	FALSE
cg19570155	chr2	36765605	36765606	FEZ2	9637	59725	Non-CGI	FALSE	TRUE	FALSE
cg19731602	chr2	219262309	219262310	CTDSP1	58190	-750	CGI-S-Shore	TRUE	FALSE	FALSE
cg19821589	chr2	170591199	170591200	KLHL23	151230	842	CGI-S-Shore	FALSE	TRUE	FALSE
cg20169521	chr2	202563587	202563588	MPP4	58538	-169	Non-CGI	TRUE	FALSE	FALSE
cg20428989	chr2	216715956	216715957	LINC00607	646324	-7696	Non-CGI	FALSE	FALSE	TRUE
cg20623601	chr2	46526843	46526844	EPAS1	2034	2301	CGI	FALSE	TRUE	FALSE
cg20801783	chr2	242693230	242693231	D2HGDH	728294	19199	CGI	FALSE	TRUE	FALSE
cg20895691	chr2	23641550	23641551	KLHL29	114818	33251	CGI-N-Shore	FALSE	TRUE	FALSE
cg21048700	chr2	189762162	189762163	COL3A1	1281	-76935	Non-CGI	FALSE	FALSE	TRUE
cg21315173	chr2	164557850	164557851	FIGN	55137	34661	Non-CGI	FALSE	TRUE	FALSE
cg21389013	chr2	27632056	27632057	PPM1G	5496	438	CGI	FALSE	TRUE	FALSE
cg21972382	chr2	29339076	29339077	CLIP4	79745	18504	CGI	FALSE	TRUE	FALSE
cg22071951	chr2	677898	677899	TMEM18	129787	-458	CGI-S-Shore	TRUE	FALSE	FALSE
cg22078934	chr2	28905057	28905058	PPP1CB	5500	-69553	Non-CGI	TRUE	FALSE	FALSE
cg22137471	chr2	46768030	46768031	RHOQ	23433	-1835	CGI-N-Shore	TRUE	TRUE	FALSE
cg22329027	chr2	3185412	3185413	TSSC1	7260	196239	CGI-S-Shore	FALSE	FALSE	TRUE
cg22409100	chr2	40658918	40658919	SLC8A1	6546	80655	Non-CGI	TRUE	TRUE	FALSE
cg22616506	chr2	99778931	99778932	LIPT1	51601	7512	Non-CGI	TRUE	TRUE	FALSE
cg22682693	chr2	164504401	164504402	FIGN	55137	88110	Non-CGI	FALSE	TRUE	FALSE
cg22734058	chr2	238578491	238578492	LRRFIP1	9208	42266	CGI	FALSE	TRUE	FALSE
cg22880456	chr2	98274984	98274985	ACTR1B	10120	5575	CGI	FALSE	TRUE	FALSE
cg23109606	chr2	85661127	85661128	SH2D6	284948	15072	CGI-N-Shelf	TRUE	TRUE	FALSE
cg23209285	chr2	236716052	236716053	AGAP1	116987	313318	CGI	FALSE	TRUE	FALSE
cg23571433	chr2	85980782	85980783	ATOH8	84913	-125	CGI	TRUE	FALSE	FALSE
cg23687288	chr2	37424015	37424016	LOC100505876	100505876	379	CGI	TRUE	TRUE	FALSE
cg23973955	chr2	75147230	75147231	POLE4	56655	-38543	CGI	FALSE	FALSE	TRUE
cg23975062	chr2	131862386	131862387	PLEKHB2	55041	-32	CGI-N-Shore	TRUE	FALSE	FALSE
cg24046888	chr2	46526785	46526786	EPAS1	2034	2243	CGI	FALSE	TRUE	FALSE
cg24599709	chr2	26578508	26578509	GPR113	165082	-8822	Non-CGI	FALSE	TRUE	FALSE
cg24632241	chr2	80530431	80530432	LRRTM1	347730	1054	CGI	TRUE	TRUE	FALSE
cg24663311	chr2	191224886	191224887	INPP1	3628	16689	Non-CGI	FALSE	TRUE	FALSE
cg24760922	chr2	54683707	54683708	SPTBN1	6711	252	CGI	TRUE	TRUE	FALSE
cg25053336	chr2	45161333	45161334	SIX3	6496	-7702	CGI	FALSE	FALSE	TRUE
cg25104233	chr2	18158708	18158709	KCNS3	3790	99593	Non-CGI	FALSE	FALSE	TRUE
cg25124739	chr2	46527098	46527099	EPAS1	2034	2556	CGI	FALSE	TRUE	FALSE
cg25339052	chr2	196399403	196399404	SLC39A10	57181	-122127	Non-CGI	FALSE	FALSE	TRUE
cg25587920	chr2	85604366	85604367	ELMOD3	84173	22522	Non-CGI	FALSE	TRUE	FALSE
cg25958062	chr2	242783729	242783730	PDCD1	5133	17327	CGI	FALSE	FALSE	TRUE
cg26427896	chr2	29686114	29686115	CLIP4	79745	365542	Non-CGI	FALSE	TRUE	FALSE
cg26537076	chr2	197458548	197458549	HECW2	57520	-1212	CGI	TRUE	FALSE	FALSE
cg26607429	chr2	40102810	40102811	SLC8A1-AS1	100128590	-41962	Non-CGI	FALSE	FALSE	TRUE
cg26672287	chr2	33391915	33391916	LTBP1	4052	219545	CGI-N-Shelf	FALSE	TRUE	FALSE
cg26780481	chr2	236772900	236772901	GBX2	2637	303750	CGI-N-Shore	FALSE	TRUE	FALSE
cg26788216	chr2	102844110	102844111	IL1RL2	8808	40676	Non-CGI	FALSE	TRUE	FALSE
cg26796670	chr2	232469021	232469022	C2orf57	165100	11445	CGI-N-Shore	FALSE	FALSE	TRUE
cg27170947	chr2	26402098	26402099	GAREML	150946	6137	CGI-S-Shore	TRUE	TRUE	FALSE
cg27228272	chr2	127772338	127772339	BIN1	274	92563	CGI-N-Shore	FALSE	FALSE	TRUE
cg27305009	chr2	175471320	175471321	WIPF1	7456	76305	Non-CGI	FALSE	TRUE	FALSE
cg27446671	chr2	242148787	242148788	ANO7	50636	20862	CGI	FALSE	TRUE	FALSE
cg27494897	chr2	151061125	151061126	RND3	390	283082	Non-CGI	FALSE	FALSE	TRUE
cg27506462	chr2	223184557	223184558	PAX3	5077	-20841	CGI	TRUE	FALSE	FALSE
ch.2.747167F	chr2	30383352	30383354	YPEL5	51646	13601	Non-CGI	FALSE	TRUE	FALSE
ch.2.4679874R	chr2	233430461	233430463	EIF4E2	9470	15103	Non-CGI	FALSE	TRUE	FALSE
cg00675650	chr3	172429335	172429336	NCEH1	57552	-326	CGI-S-Shore	TRUE	FALSE	FALSE
cg01039421	chr3	138045705	138045706	NME9	347736	3021	CGI-N-Shelf	TRUE	TRUE	FALSE
cg01313358	chr3	128841722	128841723	RAB43	339122	-728	CGI-S-Shore	TRUE	TRUE	FALSE
cg02084352	chr3	15105975	15105976	MRPS25	64432	839	CGI-N-Shore	FALSE	TRUE	FALSE
cg02944771	chr3	42057976	42057977	ULK4	54986	-54315	CGI-S-Shelf	FALSE	FALSE	TRUE
cg03376719	chr3	105086940	105086941	ALCAM	214	1382	CGI-S-Shore	FALSE	TRUE	FALSE
cg04155862	chr3	127541172	127541173	MGLL	11343	877	CGI-N-Shore	TRUE	TRUE	FALSE
cg04290349	chr3	129158183	129158184	MBD4	8930	667	CGI-N-Shore	TRUE	TRUE	FALSE
cg04470676	chr3	142858878	142858879	CHST2	9435	20259	Non-CGI	FALSE	FALSE	TRUE
cg04740522	chr3	112738055	112738056	C3orf17	25871	498	CGI	FALSE	TRUE	FALSE
cg04927429	chr3	149531388	149531389	RNF13	11342	912	CGI-S-Shore	FALSE	TRUE	FALSE
cg05062489	chr3	109404367	109404368	FLJ25363	401082	275529	Non-CGI	FALSE	FALSE	TRUE
cg05323324	chr3	194120023	194120024	GP5	2814	-27	CGI-S-Shore	TRUE	FALSE	FALSE
cg05431828	chr3	51534252	51534253	VPRBP	9730	-233	CGI	TRUE	FALSE	FALSE
cg05589743	chr3	41997020	41997021	ULK4	54986	6638	CGI	FALSE	TRUE	FALSE
cg05747448	chr3	81810940	81810941	GBE1	2632	8	CGI	TRUE	FALSE	FALSE
cg05980782	chr3	101567801	101567802	NFKBIZ	64332	20966	CGI-N-Shore	TRUE	TRUE	FALSE
cg07070178	chr3	183145849	183145850	MCF2L2	23101	4	CGI-S-Shore	TRUE	FALSE	FALSE
cg08017400	chr3	141203940	141203941	RASA2	5922	-1984	CGI-N-Shore	TRUE	FALSE	FALSE
cg08102294	chr3	13063918	13063919	IQSEC1	9922	50697	Non-CGI	FALSE	TRUE	FALSE
cg08198176	chr3	37494602	37494603	ITGA9	3680	788	CGI-S-Shore	FALSE	TRUE	FALSE
cg08738300	chr3	44038990	44038991	MIR138-1	406929	-116712	CGI-S-Shore	FALSE	FALSE	TRUE
cg08943374	chr3	38579095	38579096	EXOG	9941	41331	Non-CGI	FALSE	FALSE	TRUE
cg09618682	chr3	122921198	122921199	SEC22A	26984	423	CGI-S-Shore	FALSE	TRUE	FALSE
cg09681814	chr3	196730609	196730610	MFI2-AS1	100507057	831	CGI	FALSE	TRUE	FALSE
cg10110335	chr3	12197630	12197631	TIMP4	7079	3219	CGI-N-Shelf	FALSE	TRUE	FALSE
cg10167316	chr3	127780031	127780032	SEC61A1	29927	8818	Non-CGI	FALSE	TRUE	FALSE
cg10180092	chr3	171002363	171002364	TNIK	23043	175832	Non-CGI	FALSE	TRUE	FALSE
cg10387416	chr3	10290486	10290487	TATDN2	9797	308	CGI	TRUE	FALSE	FALSE
cg10397322	chr3	23244051	23244052	UBE2E2	7325	-600	CGI	TRUE	FALSE	FALSE
cg10527635	chr3	43389351	43389352	SNRK	54861	61346	CGI	FALSE	TRUE	FALSE
cg10541332	chr3	61237712	61237713	FHIT	2272	-578	CGI-S-Shore	TRUE	FALSE	FALSE
cg10586672	chr3	14514657	14514658	GRIP2	80852	68929	Non-CGI	FALSE	TRUE	FALSE
cg10776533	chr3	184037459	184037460	EIF4G1	1981	5175	Non-CGI	TRUE	TRUE	FALSE
cg11029367	chr3	124705145	124705146	MUC13	56667	-51549	Non-CGI	FALSE	TRUE	FALSE
cg11112833	chr3	54913073	54913074	LRTM1	57408	48997	Non-CGI	FALSE	TRUE	FALSE
cg11438039	chr3	62145697	62145698	ID2B	84099	-35304	Non-CGI	FALSE	TRUE	FALSE
cg11724602	chr3	197099072	197099073	DLG1	1739	-72928	Non-CGI	FALSE	FALSE	TRUE
cg11896170	chr3	160395073	160395074	ARL14	80117	124	Non-CGI	TRUE	FALSE	FALSE
cg12972064	chr3	171887393	171887394	FNDC3B	64778	129974	Non-CGI	FALSE	TRUE	FALSE
cg13447539	chr3	23244125	23244126	UBE2E2	7325	-526	CGI	TRUE	FALSE	FALSE
cg13474998	chr3	53165031	53165032	RFT1	91869	-560	CGI-S-Shore	TRUE	FALSE	FALSE
cg13581866	chr3	11138138	11138139	HRH1	3269	-40639	CGI-S-Shelf	FALSE	FALSE	TRUE
cg13609040	chr3	118960340	118960341	B4GALT4	8702	-587	CGI-S-Shore	TRUE	FALSE	FALSE
cg13640423	chr3	120412084	120412085	HGD	3081	-10665	Non-CGI	FALSE	TRUE	FALSE
cg13755270	chr3	188644844	188644845	TPRG1	285386	-20157	Non-CGI	FALSE	FALSE	TRUE
cg14701925	chr3	128980811	128980812	COPG1	22820	12357	Non-CGI	FALSE	TRUE	FALSE
cg14775960	chr3	126854109	126854110	PLXNA1	5361	146671	CGI-N-Shore	FALSE	FALSE	TRUE
cg14989661	chr3	38216354	38216355	OXSR1	9943	9327	Non-CGI	FALSE	TRUE	FALSE
cg15048948	chr3	196158458	196158459	UBXN7	26043	885	CGI	TRUE	TRUE	FALSE
cg15049549	chr3	48732213	48732214	NCKIPSD	51517	-8878	Non-CGI	FALSE	TRUE	FALSE
cg15825311	chr3	49948429	49948430	MST1R	4486	-7122	CGI-S-Shore	FALSE	TRUE	FALSE
cg16278514	chr3	55204279	55204280	LRTM1	57408	-242206	Non-CGI	FALSE	FALSE	TRUE
cg16414691	chr3	98534089	98534090	ST3GAL6	10402	82936	Non-CGI	FALSE	TRUE	FALSE
cg16577533	chr3	194114013	194114014	GP5	2814	5980	CGI-N-Shelf	FALSE	FALSE	TRUE
cg16840745	chr3	52091829	52091830	DUSP7	1849	-1367	CGI-S-Shore	TRUE	FALSE	FALSE
cg16913477	chr3	43124056	43124057	GTDC2	84892	23507	CGI-S-Shore	TRUE	TRUE	FALSE
cg16957824	chr3	133962408	133962409	RYK	6259	7176	Non-CGI	FALSE	TRUE	FALSE
cg17202781	chr3	5019217	5019218	BHLHE40	8553	-1878	CGI	TRUE	TRUE	FALSE
cg17300391	chr3	116164035	116164036	LSAMP	4045	348	CGI-S-Shore	TRUE	FALSE	FALSE
cg17574799	chr3	12525544	12525545	TSEN2	80746	-385	CGI-N-Shore	TRUE	FALSE	FALSE
cg17622527	chr3	64430390	64430391	PRICKLE2	166336	-219258	CGI	FALSE	FALSE	TRUE
cg17633431	chr3	122712138	122712139	SEMA5B	54437	35312	Non-CGI	TRUE	TRUE	FALSE
cg17858406	chr3	133720767	133720768	SLCO2A1	6578	28151	Non-CGI	FALSE	TRUE	FALSE
cg17913386	chr3	48632582	48632583	COL7A1	1294	9	CGI	TRUE	FALSE	FALSE
cg18081171	chr3	105086573	105086574	ALCAM	214	1015	CGI	FALSE	TRUE	FALSE
cg18257541	chr3	23244062	23244063	UBE2E2	7325	-589	CGI	TRUE	FALSE	FALSE
cg18267381	chr3	21792434	21792435	VENTXP7	391518	345215	CGI-N-Shore	TRUE	TRUE	FALSE
cg18291443	chr3	157178134	157178135	PTX3	5806	23553	Non-CGI	FALSE	TRUE	FALSE
cg18507138	chr3	26665242	26665243	LRRC3B	116135	941	CGI	TRUE	TRUE	FALSE
cg18766210	chr3	55525577	55525578	WNT5A	7474	-4245	CGI-S-Shore	FALSE	FALSE	TRUE
cg19450479	chr3	5018817	5018818	BHLHE40	8553	-2278	CGI	FALSE	TRUE	FALSE
cg19498178	chr3	17784871	17784872	TBC1D5	9779	-630	CGI-S-Shore	TRUE	FALSE	FALSE
cg20716989	chr3	187459481	187459482	BCL6	604	4030	CGI	FALSE	TRUE	FALSE
cg21436456	chr3	21792965	21792966	VENTXP7	391518	345746	CGI-S-Shore	TRUE	TRUE	FALSE
cg21860675	chr3	71586357	71586358	MIR1284	100302112	4881	Non-CGI	FALSE	TRUE	FALSE
cg22157146	chr3	15247244	15247245	COL6A4P1	344875	220	CGI-N-Shore	TRUE	FALSE	FALSE
cg22539014	chr3	52561347	52561348	NT5DC2	64943	7744	CGI-S-Shelf	FALSE	TRUE	FALSE
cg23147362	chr3	50375553	50375554	RASSF1	11186	2812	CGI	TRUE	TRUE	FALSE
cg24314564	chr3	188668940	188668941	TPRG1	285386	3936	CGI-S-Shelf	FALSE	TRUE	FALSE
cg24392939	chr3	97591258	97591259	MINA	84864	100035	Non-CGI	FALSE	TRUE	FALSE
cg24394097	chr3	155860792	155860793	KCNAB1	7881	22454	Non-CGI	TRUE	TRUE	FALSE
cg24445507	chr3	53044901	53044902	SFMBT1	51460	35186	Non-CGI	FALSE	TRUE	FALSE
cg25498969	chr3	136062740	136062741	PCCB	5096	93572	Non-CGI	FALSE	TRUE	FALSE
cg25982743	chr3	12200236	12200237	TIMP4	7079	613	CGI-N-Shore	TRUE	TRUE	FALSE
cg26158023	chr3	42881414	42881415	CCBP2	1238	35167	Non-CGI	FALSE	TRUE	FALSE
cg26353484	chr3	128903088	128903089	CNBP	7555	-277	CGI-S-Shore	TRUE	FALSE	FALSE
cg26368049	chr3	49572730	49572731	BSN-AS2	100132677	19067	CGI-S-Shelf	FALSE	TRUE	FALSE
cg27288595	chr3	141094238	141094239	ZBTB38	253461	51182	Non-CGI	FALSE	TRUE	FALSE
cg27381979	chr3	13537787	13537788	HDAC11	79885	16562	Non-CGI	FALSE	TRUE	FALSE
cg00935307	chr4	1581921	1581922	FAM53A	152877	104065	CGI-S-Shore	FALSE	FALSE	TRUE
cg01462829	chr4	11430903	11430904	HS3ST1	9957	-365	CGI	TRUE	FALSE	FALSE
cg01923775	chr4	169687969	169687970	CBR4	84869	243497	Non-CGI	FALSE	TRUE	FALSE
cg02655681	chr4	160173024	160173025	RAPGEF2	9693	-15972	CGI-S-Shore	FALSE	FALSE	TRUE
cg02774439	chr4	174451251	174451252	HAND2	9464	125	CGI	TRUE	FALSE	FALSE
cg02989600	chr4	101111617	101111618	DDIT4L	115265	36	CGI	TRUE	FALSE	FALSE
cg03311556	chr4	81108070	81108071	PRDM8	56978	2630	CGI-S-Shore	FALSE	TRUE	FALSE
cg03577139	chr4	24796988	24796989	SOD3	6649	-95	Non-CGI	TRUE	FALSE	FALSE
cg03946923	chr4	109093221	109093222	LEF1	51176	-3108	CGI	TRUE	TRUE	FALSE
cg03963654	chr4	141177084	141177085	SCOC	60592	-1354	CGI-S-Shelf	TRUE	FALSE	FALSE
cg04332373	chr4	15779642	15779643	CD38	952	-287	CGI-N-Shore	TRUE	FALSE	FALSE
cg06169041	chr4	166306860	166306861	MIR578	693163	-532	Non-CGI	TRUE	TRUE	FALSE
cg06184669	chr4	47034267	47034268	GABRB1	2560	971	CGI	FALSE	TRUE	FALSE
cg06982834	chr4	68586568	68586569	LOC550112	550112	19571	Non-CGI	FALSE	TRUE	FALSE
cg07711036	chr4	20529785	20529786	MIR218-1	407000	-111	Non-CGI	TRUE	TRUE	FALSE
cg07795325	chr4	114557667	114557668	CAMK2D	817	125414	Non-CGI	FALSE	TRUE	FALSE
cg08404328	chr4	56212072	56212073	SRD5A3	79644	-314	CGI-N-Shore	TRUE	FALSE	FALSE
cg09023584	chr4	2273606	2273607	MXD4	10608	-9866	CGI-N-Shelf	FALSE	TRUE	FALSE
cg09560763	chr4	81114251	81114252	PRDM8	56978	8811	CGI-S-Shelf	FALSE	TRUE	FALSE
cg09566023	chr4	48970898	48970899	CWH43	80157	-17365	Non-CGI	FALSE	FALSE	TRUE
cg09611363	chr4	76912323	76912324	SDAD1	55153	-209	CGI-S-Shore	TRUE	FALSE	FALSE
cg09635395	chr4	146601470	146601471	C4orf51	646603	113	Non-CGI	TRUE	FALSE	FALSE
cg10207052	chr4	147444204	147444205	SLC10A7	84068	-1080	CGI-S-Shore	TRUE	FALSE	FALSE
cg10373086	chr4	111544286	111544287	PITX2	5308	18991	CGI	TRUE	TRUE	FALSE
cg10695325	chr4	81106463	81106464	PRDM8	56978	1023	CGI-S-Shore	TRUE	TRUE	FALSE
cg10900313	chr4	152147390	152147391	SH3D19	152503	1790	Non-CGI	TRUE	TRUE	FALSE
cg11468363	chr4	87857418	87857419	AFF1	4299	1263	CGI	TRUE	TRUE	FALSE
cg12094402	chr4	3767402	3767403	ADRA2C	152	-892	CGI	TRUE	FALSE	FALSE
cg12229172	chr4	140587147	140587148	MGST2	4258	224	CGI	TRUE	FALSE	FALSE
cg12628070	chr4	169535234	169535235	PALLD	23022	117016	Non-CGI	FALSE	TRUE	FALSE
cg12947485	chr4	25310668	25310669	ZCCHC4	29063	-3726	CGI-N-Shelf	FALSE	FALSE	TRUE
cg13351830	chr4	78979947	78979948	FRAS1	80144	1222	CGI	FALSE	TRUE	FALSE
cg13978856	chr4	40918191	40918192	NSUN7	79730	166276	Non-CGI	FALSE	TRUE	FALSE
cg15345393	chr4	113210708	113210709	TIFA	92610	-3648	CGI-S-Shelf	FALSE	FALSE	TRUE
cg15603957	chr4	91049645	91049646	CCSER1	401145	960	CGI	FALSE	TRUE	FALSE
cg15645986	chr4	26585391	26585392	TBC1D19	55296	-153	CGI	TRUE	FALSE	FALSE
cg15885274	chr4	6891202	6891203	TBC1D14	57533	-19967	CGI	FALSE	FALSE	TRUE
cg16348068	chr4	1626504	1626505	FAM53A	152877	59482	CGI-S-Shore	FALSE	FALSE	TRUE
cg16532497	chr4	44448931	44448932	KCTD8	386617	1891	CGI-N-Shore	FALSE	TRUE	FALSE
cg17814479	chr4	155056945	155056946	SFRP2	6423	-346716	CGI	FALSE	FALSE	TRUE
cg18146246	chr4	1554677	1554678	FAM53A	152877	131309	CGI	FALSE	FALSE	TRUE
cg18672030	chr4	37668528	37668529	RELL1	768211	19469	CGI-N-Shore	FALSE	TRUE	FALSE
cg19129145	chr4	127877739	127877740	INTU	27152	-676346	CGI	FALSE	FALSE	TRUE
cg19487718	chr4	185747708	185747709	ACSL1	2180	-492	CGI	TRUE	FALSE	FALSE
cg19520201	chr4	53588360	53588361	SNORA26	677810	8943	CGI	FALSE	FALSE	TRUE
cg20342788	chr4	152242679	152242680	PRSS48	345062	44353	CGI-N-Shelf	FALSE	FALSE	TRUE
cg20601329	chr4	54231411	54231412	SCFD2	152579	829	CGI-N-Shore	TRUE	FALSE	FALSE
cg21059834	chr4	41884631	41884632	TMEM33	55161	-52504	CGI-S-Shore	TRUE	FALSE	FALSE
cg21129041	chr4	20528506	20528507	MIR218-1	407000	-1390	Non-CGI	TRUE	TRUE	FALSE
cg21183389	chr4	113761787	113761788	ANK2	287	22547	Non-CGI	FALSE	TRUE	FALSE
cg21411366	chr4	24797176	24797177	SOD3	6649	90	CGI-N-Shelf	TRUE	FALSE	FALSE
cg21530280	chr4	174451394	174451395	HAND2	9464	-15	CGI	TRUE	FALSE	FALSE
cg21618036	chr4	183621609	183621610	DCTD	1635	217019	Non-CGI	FALSE	TRUE	FALSE
cg21956614	chr4	129439073	129439074	PGRMC2	10424	-229088	Non-CGI	FALSE	TRUE	FALSE
cg22089942	chr4	84050283	84050284	PLAC8	51316	-14371	Non-CGI	FALSE	FALSE	TRUE
cg22391185	chr4	149364789	149364790	NR3C2	4306	-1116	CGI	TRUE	FALSE	FALSE
cg22906397	chr4	160204019	160204020	RAPGEF2	9693	15020	Non-CGI	FALSE	TRUE	FALSE
cg23038580	chr4	77184168	77184169	FAM47E-STBD1	100631383	11314	Non-CGI	FALSE	TRUE	FALSE
cg23664174	chr4	54357316	54357317	PDGFRA	5156	113495	Non-CGI	FALSE	TRUE	FALSE
cg23812325	chr4	56915719	56915720	CEP135	9662	100681	CGI	FALSE	FALSE	TRUE
cg23912454	chr4	156588387	156588388	GUCY1A3	2982	524	CGI	TRUE	TRUE	FALSE
cg24843443	chr4	169402197	169402198	DDX60L	91351	-558	CGI-S-Shore	TRUE	FALSE	FALSE
cg25403803	chr4	955905	955906	DGKQ	1609	11437	CGI	FALSE	TRUE	FALSE
cg25616573	chr4	156684300	156684301	GUCY1B3	2983	4173	CGI-S-Shelf	FALSE	TRUE	FALSE
cg26405979	chr4	8239303	8239304	HTRA3	94031	-32184	Non-CGI	FALSE	TRUE	FALSE
cg26582230	chr4	3371652	3371653	HGFAC	3083	-72072	CGI-N-Shore	TRUE	TRUE	FALSE
cg26642420	chr4	146601345	146601346	C4orf51	646603	-9	Non-CGI	TRUE	FALSE	FALSE
cg00106565	chr5	146784171	146784172	DPYSL3	1809	105446	Non-CGI	FALSE	TRUE	FALSE
cg00500100	chr5	140098250	140098251	VTRNA1-2	56663	-259	Non-CGI	TRUE	FALSE	FALSE
cg00520708	chr5	134181266	134181267	C5orf24	134553	-102	CGI-N-Shore	TRUE	FALSE	FALSE
cg00652942	chr5	170847313	170847314	FGF18	8817	645	CGI	FALSE	TRUE	FALSE
cg00799171	chr5	123987737	123987738	ZNF608	57507	96761	CGI-S-Shore	FALSE	TRUE	FALSE
cg00889769	chr5	114515341	114515342	TRIM36	55521	900	CGI	FALSE	TRUE	FALSE
cg00979195	chr5	132155965	132155966	SOWAHA	134548	6931	CGI-S-Shore	FALSE	FALSE	TRUE
cg01403803	chr5	123987218	123987219	ZNF608	57507	97280	CGI-N-Shore	FALSE	TRUE	FALSE
cg01784614	chr5	40841298	40841299	CARD6	84674	-110	Non-CGI	TRUE	FALSE	FALSE
cg01824349	chr5	98260405	98260406	CHD1	1105	1831	CGI-N-Shelf	FALSE	TRUE	FALSE
cg02312715	chr5	7926692	7926693	MTRR	4552	57474	Non-CGI	FALSE	FALSE	TRUE
cg02484352	chr5	131599890	131599891	PDLIM4	8572	6538	Non-CGI	FALSE	TRUE	FALSE
cg03967521	chr5	123987747	123987748	ZNF608	57507	96751	CGI-S-Shore	FALSE	TRUE	FALSE
cg04233770	chr5	137475002	137475003	NME5	8382	128	CGI	FALSE	TRUE	FALSE
cg04280969	chr5	126626092	126626093	MEGF10	84466	-362	CGI	TRUE	FALSE	FALSE
cg04470060	chr5	141870810	141870811	SPRY4	81848	-166189	Non-CGI	FALSE	FALSE	TRUE
cg04677344	chr5	76326870	76326871	AGGF1	55109	659	CGI	FALSE	TRUE	FALSE
cg05138787	chr5	14405925	14405926	FAM105A	54491	-175964	CGI	FALSE	TRUE	FALSE
cg05157516	chr5	175085577	175085578	HRH2	3274	536	CGI	FALSE	TRUE	FALSE
cg05164540	chr5	107896573	107896574	FBXL17	64839	-178773	CGI-S-Shore	FALSE	FALSE	TRUE
cg05168015	chr5	171880461	171880462	SH3PXD2B	285590	1064	CGI-N-Shore	FALSE	TRUE	FALSE
cg05202497	chr5	154317929	154317930	GEMIN5	25929	-152	CGI-S-Shore	TRUE	FALSE	FALSE
cg05613935	chr5	1667205	1667206	LOC728613	728613	-33084	CGI-N-Shore	FALSE	FALSE	TRUE
cg05959277	chr5	1807205	1807206	NDUFS6	4726	5708	CGI	FALSE	TRUE	FALSE
cg06161964	chr5	1884513	1884514	IRX4	50805	-1632	CGI-S-Shore	TRUE	FALSE	FALSE
cg06527989	chr5	176239974	176239975	UNC5A	90249	2413	CGI-S-Shore	FALSE	TRUE	FALSE
cg06565615	chr5	137957283	137957284	HSPA9	3313	-45964	Non-CGI	FALSE	FALSE	TRUE
cg06940792	chr5	126626557	126626558	MEGF10	84466	100	CGI	TRUE	FALSE	FALSE
cg07450552	chr5	138775419	138775420	DNAJC18	202052	-204	CGI-S-Shore	TRUE	FALSE	FALSE
cg07472398	chr5	130501141	130501142	HINT1	3094	-106	CGI-S-Shore	TRUE	FALSE	FALSE
cg07684019	chr5	139174529	139174530	PSD2	84249	-875	CGI-N-Shore	TRUE	FALSE	FALSE
cg07730039	chr5	74330737	74330738	GCNT4	51301	-4012	CGI-N-Shore	FALSE	FALSE	TRUE
cg08628875	chr5	33441799	33441800	TARS	6897	900	CGI-S-Shore	FALSE	TRUE	FALSE
cg09038885	chr5	159343148	159343149	ADRA1B	147	-590	CGI-N-Shore	TRUE	FALSE	FALSE
cg09588474	chr5	96519644	96519645	RIOK2	55781	-638	CGI	TRUE	FALSE	FALSE
cg09651708	chr5	97676915	97676916	RGMB	285704	-428082	Non-CGI	FALSE	FALSE	TRUE
cg10604528	chr5	87437959	87437960	TMEM161B	153396	126704	CGI	FALSE	FALSE	TRUE
cg10878230	chr5	96314976	96314977	LNPEP	4012	43629	Non-CGI	FALSE	TRUE	FALSE
cg11011625	chr5	140718283	140718284	PCDHGA2	56113	-69	CGI-N-Shore	TRUE	TRUE	FALSE
cg11888447	chr5	55705596	55705597	ANKRD55	79722	-176409	Non-CGI	FALSE	FALSE	TRUE
cg12598025	chr5	172091816	172091817	NEURL1B	54492	23539	Non-CGI	FALSE	TRUE	FALSE
cg13042527	chr5	1492873	1492874	LPCAT1	79888	31201	CGI-S-Shore	FALSE	TRUE	FALSE
cg13664919	chr5	883953	883954	BRD9	65980	8984	CGI	TRUE	TRUE	FALSE
cg13869401	chr5	54179537	54179538	ESM1	11082	101875	CGI	FALSE	FALSE	TRUE
cg13963033	chr5	126220247	126220248	LMNB1	4001	107931	Non-CGI	FALSE	TRUE	FALSE
cg13983903	chr5	57751418	57751419	PLK2	10769	4546	CGI-N-Shelf	FALSE	TRUE	FALSE
cg14759342	chr5	115911760	115911761	SEMA6A	57556	-1208	CGI	TRUE	FALSE	FALSE
cg14818279	chr5	148442554	148442555	SH3TC2	79628	181	Non-CGI	TRUE	FALSE	FALSE
cg14971998	chr5	139488181	139488182	PURA	5813	-5525	CGI	TRUE	FALSE	FALSE
cg15165154	chr5	139041014	139041015	CXXC5	51523	12712	CGI-S-Shore	FALSE	TRUE	FALSE
cg15693937	chr5	76429218	76429219	ZBED3	84327	-46187	Non-CGI	FALSE	TRUE	FALSE
cg16641358	chr5	15930438	15930439	MARCH11	441061	249457	CGI-S-Shore	FALSE	TRUE	FALSE
cg17046141	chr5	53173166	53173167	MIR581	693166	74261	Non-CGI	TRUE	FALSE	FALSE
cg17409809	chr5	1667128	1667129	LOC728613	728613	-33007	CGI-N-Shore	FALSE	FALSE	TRUE
cg17462107	chr5	66199867	66199868	CD180	4064	292748	Non-CGI	FALSE	TRUE	FALSE
cg17543112	chr5	131594335	131594336	PDLIM4	8572	983	CGI-S-Shore	FALSE	TRUE	FALSE
cg17629870	chr5	57756980	57756981	PLK2	10769	-1013	CGI-S-Shore	TRUE	FALSE	FALSE
cg17809170	chr5	149461325	149461326	CSF1R	1436	31608	Non-CGI	TRUE	TRUE	FALSE
cg17820459	chr5	150400531	150400532	GPX3	2878	531	CGI-S-Shore	FALSE	TRUE	FALSE
cg17876308	chr5	162864496	162864497	CCNG1	900	-79	CGI	TRUE	FALSE	FALSE
cg17879574	chr5	136646719	136646720	SPOCK1	6695	188297	Non-CGI	FALSE	TRUE	FALSE
cg18478038	chr5	70751223	70751224	BDP1	55814	-217	CGI-N-Shore	TRUE	FALSE	FALSE
cg19088984	chr5	100239319	100239320	ST8SIA4	7903	-331	CGI	TRUE	FALSE	FALSE
cg19486756	chr5	150281191	150281192	ZNF300	91975	3352	CGI-N-Shelf	FALSE	TRUE	FALSE
cg19870978	chr5	137673245	137673246	FAM53C	51307	20	CGI-N-Shore	TRUE	TRUE	FALSE
cg19979108	chr5	171870875	171870876	SH3PXD2B	285590	10650	Non-CGI	FALSE	TRUE	FALSE
cg20287640	chr5	131825644	131825645	IRF1	3659	5613	CGI-N-Shore	TRUE	TRUE	FALSE
cg20674891	chr5	148652108	148652109	AFAP1L1	134265	706	CGI	FALSE	TRUE	FALSE
cg21147203	chr5	134529659	134529660	LOC340073	340073	54206	CGI-S-Shelf	FALSE	TRUE	FALSE
cg21527584	chr5	121794326	121794327	SNCAIP	9627	146939	Non-CGI	FALSE	TRUE	FALSE
cg21530267	chr5	140481267	140481268	PCDHB3	56132	1032	CGI	TRUE	TRUE	FALSE
cg21677976	chr5	170171486	170171487	GABRP	2568	-39235	CGI	FALSE	FALSE	TRUE
cg21919857	chr5	180018102	180018103	SCGB3A1	92304	383	CGI	FALSE	TRUE	FALSE
cg22434226	chr5	139554488	139554489	CYSTM1	84418	-163	CGI	TRUE	FALSE	FALSE
cg22712893	chr5	159846553	159846554	SLU7	10569	-384	CGI-S-Shore	TRUE	FALSE	FALSE
cg23300372	chr5	71015432	71015433	CARTPT	9607	441	CGI	FALSE	TRUE	FALSE
cg24163613	chr5	75012816	75012817	POC5	134359	495	CGI-N-Shore	FALSE	TRUE	FALSE
cg24168884	chr5	140552153	140552154	PCDHB7	56129	-88	CGI-N-Shore	TRUE	FALSE	FALSE
cg24757562	chr5	174487132	174487133	MIR4634	100616202	308394	Non-CGI	FALSE	FALSE	TRUE
cg24975342	chr5	55193659	55193660	IL31RA	133396	46451	Non-CGI	FALSE	TRUE	FALSE
cg25110341	chr5	121836326	121836327	SNCAIP	9627	188939	Non-CGI	FALSE	FALSE	TRUE
cg25920839	chr5	169010408	169010409	SPDL1	54908	-228	CGI-N-Shore	TRUE	FALSE	FALSE
cg26302614	chr5	16465130	16465131	ZNF622	90441	762	CGI-N-Shore	FALSE	TRUE	FALSE
cg26670985	chr5	171482761	171482762	FBXW11	23291	-48883	Non-CGI	FALSE	TRUE	FALSE
cg26775866	chr5	159849193	159849194	PTTG1	9232	327	CGI-S-Shore	TRUE	TRUE	FALSE
cg26810146	chr5	41924792	41924793	FBXO4	26272	-562	CGI-N-Shore	TRUE	FALSE	FALSE
cg27350063	chr5	170175081	170175082	GABRP	2568	-35640	CGI-S-Shelf	FALSE	FALSE	TRUE
ch.5.1339988F	chr5	71435042	71435044	MIR4803	100616377	-30249	Non-CGI	FALSE	TRUE	FALSE
ch.5.2763962F	chr5	147115232	147115234	JAKMIP2	9832	47017	Non-CGI	FALSE	TRUE	FALSE
cg00136547	chr6	56507796	56507797	DST	667	208916	Non-CGI	TRUE	TRUE	FALSE
cg00374105	chr6	34843579	34843580	TAF11	6882	12238	Non-CGI	FALSE	TRUE	FALSE
cg00480033	chr6	13870551	13870552	RNF182	221687	-54124	CGI-N-Shore	FALSE	FALSE	TRUE
cg00579036	chr6	25138551	25138552	CMAHP	8418	28240	CGI-N-Shore	TRUE	TRUE	FALSE
cg00664405	chr6	1382670	1382671	FOXF2	2295	-7397	CGI	FALSE	FALSE	TRUE
cg00885461	chr6	37465801	37465802	CCDC167	154467	1897	CGI-N-Shore	FALSE	TRUE	FALSE
cg01114937	chr6	85474585	85474586	TBX18	9096	-685	CGI	TRUE	FALSE	FALSE
cg01274812	chr6	12404380	12404381	EDN1	1906	113850	Non-CGI	FALSE	FALSE	TRUE
cg01338705	chr6	157368215	157368216	MIR4466	100616154	-267349	Non-CGI	FALSE	TRUE	FALSE
cg01542644	chr6	26458326	26458327	BTN2A1	11120	172	CGI-N-Shore	TRUE	FALSE	FALSE
cg01611372	chr6	125372668	125372669	STL	7955	-88494	Non-CGI	FALSE	TRUE	FALSE
cg01769037	chr6	15246613	15246614	JARID2	3720	878	CGI-S-Shore	TRUE	TRUE	FALSE
cg01832737	chr6	166075022	166075023	PDE10A	10846	564	CGI	FALSE	TRUE	FALSE
cg02045355	chr6	26365194	26365195	BTN3A2	11118	-202	Non-CGI	TRUE	FALSE	FALSE
cg02525926	chr6	28880227	28880228	TRIM27	5987	11539	Non-CGI	FALSE	TRUE	FALSE
cg02535111	chr6	126306670	126306671	TRMT11	60487	-904	CGI-N-Shore	TRUE	FALSE	FALSE
cg02647297	chr6	3867369	3867370	FAM50B	26240	17736	Non-CGI	FALSE	FALSE	TRUE
cg02654940	chr6	34206400	34206401	HMGA1	3159	1822	CGI-S-Shore	TRUE	TRUE	FALSE
cg02832512	chr6	22113516	22113517	LOC729177	729177	33904	Non-CGI	FALSE	TRUE	FALSE
cg03229061	chr6	33048483	33048484	HLA-DPA1	3113	70	CGI	TRUE	TRUE	FALSE
cg03495053	chr6	169650832	169650833	THBS2	7058	3303	CGI-S-Shore	FALSE	TRUE	FALSE
cg04040884	chr6	2949127	2949128	SERPINB6	5269	23270	CGI	FALSE	TRUE	FALSE
cg04303920	chr6	73951939	73951940	KHDC1L	100129128	-16763	Non-CGI	FALSE	TRUE	FALSE
cg04385598	chr6	33424048	33424049	ZBTB9	221504	1691	CGI-S-Shore	TRUE	TRUE	FALSE
cg04486019	chr6	28510281	28510282	GPX5	2880	16491	CGI	FALSE	FALSE	TRUE
cg04627871	chr6	31703921	31703922	CLIC1	1192	418	CGI-N-Shelf	FALSE	TRUE	FALSE
cg04636765	chr6	168766666	168766667	DACT2	168002	-46263	CGI	FALSE	FALSE	TRUE
cg05002580	chr6	157514665	157514666	TMEM242	729515	230586	Non-CGI	FALSE	TRUE	FALSE
cg05208582	chr6	11216594	11216595	ERVFRD-1	405754	-104522	Non-CGI	FALSE	TRUE	FALSE
cg05362405	chr6	32822352	32822353	PSMB9	5698	413	CGI-S-Shore	TRUE	TRUE	FALSE
cg05494073	chr6	31781411	31781412	HSPA1A	3303	-1878	CGI-N-Shore	TRUE	TRUE	FALSE
cg06113776	chr6	33151943	33151944	COL11A2	1302	8300	Non-CGI	FALSE	TRUE	FALSE
cg06186820	chr6	28510514	28510515	GPX5	2880	16724	CGI	FALSE	FALSE	TRUE
cg06245776	chr6	31461748	31461749	MICB	4277	-908	CGI	TRUE	FALSE	FALSE
cg06417831	chr6	43596987	43596988	GTPBP2	54676	-50	CGI	TRUE	FALSE	FALSE
cg06671660	chr6	41068741	41068742	ADCY10P1	221442	-30	CGI	TRUE	TRUE	FALSE
cg06731192	chr6	28864079	28864080	TRIM27	5987	27687	CGI	TRUE	FALSE	FALSE
cg07400063	chr6	31126981	31126982	TCF19	6941	677	CGI	TRUE	TRUE	FALSE
cg07439316	chr6	31645405	31645406	LY6G5C	80741	6410	CGI-N-Shelf	FALSE	TRUE	FALSE
cg07479491	chr6	7726108	7726109	BMP6	654	-901	CGI-N-Shore	TRUE	FALSE	FALSE
cg07553475	chr6	21665800	21665801	LINC00340	401237	796	CGI	TRUE	TRUE	FALSE
cg07653289	chr6	30325734	30325735	RPP21	79897	12827	CGI-N-Shore	FALSE	FALSE	TRUE
cg07725163	chr6	72121351	72121352	MIR30A	407029	-8026	Non-CGI	FALSE	FALSE	TRUE
cg07810982	chr6	30157765	30157766	TRIM26	7726	23504	Non-CGI	FALSE	TRUE	FALSE
cg08136020	chr6	14735175	14735176	JARID2	3720	-510557	Non-CGI	FALSE	FALSE	TRUE
cg08204571	chr6	3259011	3259012	PSMG4	389362	-149	CGI	TRUE	TRUE	FALSE
cg08635134	chr6	30594456	30594457	ATAT1	79969	-155	CGI-N-Shore	TRUE	FALSE	FALSE
cg08692676	chr6	134299594	134299595	TBPL1	9519	26285	Non-CGI	FALSE	TRUE	FALSE
cg08976526	chr6	32337930	32337931	C6orf10	10665	1724	Non-CGI	FALSE	TRUE	FALSE
cg09184378	chr6	126698055	126698056	CENPW	387103	36801	Non-CGI	FALSE	FALSE	TRUE
cg09354380	chr6	106258324	106258325	PRDM1	639	-275869	Non-CGI	FALSE	FALSE	TRUE
cg09533063	chr6	135271589	135271590	ALDH8A1	64577	-328	Non-CGI	TRUE	FALSE	FALSE
cg09749813	chr6	85474209	85474210	TBX18	9096	-309	CGI	TRUE	FALSE	FALSE
cg09832267	chr6	31649372	31649373	LY6G5C	80741	2443	CGI	TRUE	TRUE	FALSE
cg10692140	chr6	30496072	30496073	PRR3	80742	-28412	Non-CGI	FALSE	FALSE	TRUE
cg10950723	chr6	31645677	31645678	LY6G5C	80741	6138	CGI-N-Shelf	FALSE	TRUE	FALSE
cg11064935	chr6	34164525	34164526	HMGA1	3159	-40050	CGI-S-Shore	FALSE	FALSE	TRUE
cg11075693	chr6	82461261	82461262	FAM46A	55603	1165	CGI	FALSE	TRUE	FALSE
cg11783815	chr6	33558433	33558434	LINC00336	401253	2680	CGI-N-Shelf	FALSE	TRUE	FALSE
cg11900861	chr6	21666666	21666667	LINC00340	401237	1662	CGI	TRUE	TRUE	FALSE
cg11938672	chr6	170055155	170055156	WDR27	253769	47002	CGI	FALSE	TRUE	FALSE
cg12308909	chr6	167042108	167042109	MIR1913	100302141	-119186	CGI	TRUE	TRUE	FALSE
cg12417720	chr6	108878861	108878862	FOXO3	2309	-2163	CGI	FALSE	FALSE	TRUE
cg12611439	chr6	38238063	38238064	BTBD9	114781	369859	Non-CGI	FALSE	TRUE	FALSE
cg12650685	chr6	3284109	3284110	PSMG4	389362	24946	CGI-N-Shore	FALSE	TRUE	FALSE
cg12762680	chr6	32822346	32822347	PSMB9	5698	407	CGI-S-Shore	TRUE	TRUE	FALSE
cg12914954	chr6	109396312	109396313	SESN1	27244	19394	Non-CGI	FALSE	TRUE	FALSE
cg12952190	chr6	33256441	33256442	WDR46	9277	861	CGI-N-Shore	TRUE	TRUE	FALSE
cg13212186	chr6	31166504	31166505	HCG27	253018	966	CGI-S-Shore	FALSE	TRUE	FALSE
cg13281171	chr6	10887003	10887004	GCM2	9247	-4904	CGI	TRUE	TRUE	FALSE
cg13336690	chr6	32976484	32976485	HLA-DOA	3111	903	CGI-S-Shore	FALSE	TRUE	FALSE
cg13396830	chr6	30181581	30181582	TRIM26	7726	-309	CGI	TRUE	FALSE	FALSE
cg13948987	chr6	55039259	55039260	HCRTR2	3062	187	CGI	TRUE	TRUE	FALSE
cg14068328	chr6	85474087	85474088	TBX18	9096	-187	CGI	TRUE	FALSE	FALSE
cg14096229	chr6	32374493	32374494	BTNL2	56244	405	Non-CGI	FALSE	TRUE	FALSE
cg14204081	chr6	170190660	170190661	LINC00574	80069	490	CGI	FALSE	TRUE	FALSE
cg14646893	chr6	143592425	143592426	ADAT2	134637	179414	Non-CGI	FALSE	TRUE	FALSE
cg14756795	chr6	31621299	31621300	BAG6	7917	-821	CGI-S-Shore	TRUE	TRUE	FALSE
cg14841796	chr6	29598285	29598286	GABBR1	2550	2675	CGI-S-Shore	FALSE	TRUE	FALSE
cg14910524	chr6	31541948	31541949	TNF	7124	-1400	Non-CGI	TRUE	TRUE	FALSE
cg15115757	chr6	32795627	32795628	HLA-DOB	3112	-10801	Non-CGI	FALSE	TRUE	FALSE
cg15712520	chr6	32049263	32049264	TNXB	7148	36206	CGI-S-Shelf	FALSE	TRUE	FALSE
cg16220567	chr6	31631762	31631763	CSNK2B	1460	-1893	CGI-N-Shore	TRUE	TRUE	FALSE
cg16331679	chr6	146920166	146920167	ADGB	79747	29	CGI	TRUE	FALSE	FALSE
cg16333440	chr6	28967766	28967767	ZNF311	282890	5325	Non-CGI	TRUE	TRUE	FALSE
cg16420756	chr6	5026219	5026220	RPP40	10799	-21947	CGI	FALSE	TRUE	FALSE
cg16513215	chr6	32164588	32164589	GPSM3	63940	-1287	CGI	TRUE	TRUE	FALSE
cg16523850	chr6	54156824	54156825	TINAG	27283	-16377	Non-CGI	FALSE	FALSE	TRUE
cg16630085	chr6	132580009	132580010	LOC100507254	100507254	124890	Non-CGI	FALSE	FALSE	TRUE
cg17232861	chr6	30128385	30128386	TRIM10	10107	324	CGI-N-Shelf	TRUE	FALSE	FALSE
cg17264271	chr6	152126938	152126939	ESR1	2099	115306	CGI-N-Shore	TRUE	TRUE	FALSE
cg17486314	chr6	90778227	90778228	GJA10	84694	174038	Non-CGI	FALSE	TRUE	FALSE
cg17531889	chr6	169568517	169568518	THBS2	7058	85618	CGI-S-Shore	FALSE	FALSE	TRUE
cg18007957	chr6	152011666	152011667	ESR1	2099	34	Non-CGI	TRUE	FALSE	FALSE
cg18019509	chr6	86370111	86370112	SNORD50A	26799	16973	Non-CGI	FALSE	FALSE	TRUE
cg18086664	chr6	31409706	31409707	HCP5	10866	-21249	CGI-S-Shore	FALSE	FALSE	TRUE
cg18322025	chr6	170055332	170055333	WDR27	253769	46825	CGI	FALSE	TRUE	FALSE
cg18505752	chr6	32808752	32808753	TAP2	6891	-2204	CGI-S-Shelf	FALSE	TRUE	FALSE
cg18670721	chr6	34113570	34113571	GRM4	2914	297	CGI	FALSE	TRUE	FALSE
cg18679635	chr6	6971315	6971316	RREB1	6239	-136513	Non-CGI	FALSE	FALSE	TRUE
cg19404567	chr6	33049494	33049495	HLA-DPA1	3113	-938	CGI-S-Shore	TRUE	TRUE	FALSE
cg19734655	chr6	39083175	39083176	SAYSD1	55776	-309	CGI-S-Shore	TRUE	FALSE	FALSE
cg20107184	chr6	46967866	46967867	GPR110	266977	42214	Non-CGI	FALSE	TRUE	FALSE
cg20496270	chr6	158653940	158653941	GTF2H5	404672	64560	CGI	FALSE	FALSE	TRUE
cg20782805	chr6	30623779	30623780	C6orf136	221545	8962	Non-CGI	FALSE	TRUE	FALSE
cg21293943	chr6	32337906	32337907	C6orf10	10665	1748	Non-CGI	FALSE	TRUE	FALSE
cg21679468	chr6	127785332	127785333	KIAA0408	9729	-4796	Non-CGI	FALSE	TRUE	FALSE
cg21723245	chr6	29973407	29973408	HCG9	10255	30514	CGI-N-Shore	TRUE	TRUE	FALSE
cg22388948	chr6	82460558	82460559	FAM46A	55603	1868	CGI-N-Shore	FALSE	TRUE	FALSE
cg22510079	chr6	32809403	32809404	LOC100507463	100507463	-2458	CGI-S-Shelf	FALSE	TRUE	FALSE
cg23192824	chr6	142738443	142738444	GPR126	57211	115386	Non-CGI	TRUE	TRUE	FALSE
cg23631909	chr6	137736680	137736681	OLIG3	167826	78849	CGI	FALSE	FALSE	TRUE
cg23788917	chr6	8435910	8435911	LOC100506207	100506207	53	CGI	TRUE	FALSE	FALSE
cg24331963	chr6	31084146	31084147	PSORS1C1	170679	1537	Non-CGI	FALSE	TRUE	FALSE
cg24465845	chr6	116359135	116359136	TPI1P3	728402	-757	Non-CGI	TRUE	TRUE	FALSE
cg24908097	chr6	116744279	116744280	FAM26F	441168	-38275	Non-CGI	FALSE	TRUE	FALSE
cg25247351	chr6	32908794	32908795	HLA-DMB	3109	51	Non-CGI	TRUE	FALSE	FALSE
cg25589070	chr6	11768095	11768096	ADTRP	84830	11183	CGI-N-Shelf	FALSE	TRUE	FALSE
cg26074411	chr6	169568564	169568565	THBS2	7058	85571	CGI-S-Shore	FALSE	FALSE	TRUE
cg26121436	chr6	30164267	30164268	TRIM26	7726	17002	CGI-N-Shelf	FALSE	TRUE	FALSE
cg26256916	chr6	26183823	26183824	HIST1H2BE	8344	-199	CGI-S-Shore	TRUE	FALSE	FALSE
cg26418589	chr6	28442796	28442797	ZSCAN23	222696	-31516	Non-CGI	TRUE	FALSE	FALSE
cg26433102	chr6	391441	391442	IRF4	3662	-296	CGI	TRUE	FALSE	FALSE
cg26460247	chr6	97372626	97372627	KLHL32	114792	129	CGI	TRUE	FALSE	FALSE
cg26771384	chr6	119252835	119252836	MCM9	254394	3490	CGI-N-Shelf	TRUE	TRUE	FALSE
cg26846959	chr6	143998958	143998959	PHACTR2	9749	69640	CGI-N-Shore	TRUE	TRUE	FALSE
cg26889844	chr6	130451373	130451374	L3MBTL3	84456	111644	Non-CGI	FALSE	TRUE	FALSE
cg27018424	chr6	33173425	33173426	HSD17B8	7923	1005	CGI-S-Shore	FALSE	TRUE	FALSE
cg27618777	chr6	32804628	32804629	TAP2	6891	1917	CGI-N-Shore	FALSE	TRUE	FALSE
ch.6.3213513F	chr6	162851709	162851711	PACRG	135138	-296452	Non-CGI	FALSE	TRUE	FALSE
cg00029246	chr7	137223417	137223418	PTN	5764	-194870	Non-CGI	FALSE	TRUE	FALSE
cg00039564	chr7	27780592	27780593	TAX1BP1	8887	1599	CGI	FALSE	TRUE	FALSE
cg00099393	chr7	157361621	157361622	MIR153-2	406945	5491	CGI	FALSE	TRUE	FALSE
cg00200074	chr7	103848802	103848803	ORC5	5001	-306	CGI	TRUE	FALSE	FALSE
cg00236141	chr7	1936854	1936855	MIR4655	100616160	-52964	CGI	FALSE	TRUE	FALSE
cg00355281	chr7	24323767	24323768	NPY	4852	-38	CGI	TRUE	FALSE	FALSE
cg00498010	chr7	4805943	4805944	AP5Z1	9907	-9317	CGI-S-Shore	FALSE	TRUE	FALSE
cg00546491	chr7	32111062	32111063	PDE1C	5137	227319	CGI-S-Shore	TRUE	TRUE	FALSE
cg00587042	chr7	42927968	42927969	PSMA2	5683	43835	CGI	FALSE	FALSE	TRUE
cg00622763	chr7	128556770	128556771	KCP	375616	-5996	CGI-S-Shore	FALSE	FALSE	TRUE
cg00933263	chr7	56434951	56434952	LOC650226	650226	81115	CGI	FALSE	FALSE	TRUE
cg01215762	chr7	27214126	27214127	MIR196B	442920	-4943	CGI	TRUE	TRUE	FALSE
cg01399219	chr7	44145110	44145111	AEBP1	165	1149	CGI-S-Shore	FALSE	TRUE	FALSE
cg01597641	chr7	155241970	155241971	EN2	2020	-8852	CGI	FALSE	FALSE	TRUE
cg01690872	chr7	132250373	132250374	PLXNA4	91584	83072	Non-CGI	FALSE	TRUE	FALSE
cg02360001	chr7	39683993	39683994	RALA	5898	20840	Non-CGI	FALSE	TRUE	FALSE
cg02420406	chr7	7606596	7606597	MIOS	54468	-18	CGI	TRUE	FALSE	FALSE
cg02439266	chr7	27150042	27150043	HOXA2	3199	-7647	CGI	FALSE	TRUE	FALSE
cg02858808	chr7	101829330	101829331	SH2B2	10603	-99073	CGI	FALSE	TRUE	FALSE
cg03150857	chr7	106300577	106300578	CCDC71L	168455	1055	CGI	TRUE	TRUE	FALSE
cg03167413	chr7	113723093	113723094	FOXP2	93986	-3270	CGI	FALSE	FALSE	TRUE
cg03483426	chr7	134671876	134671877	AGBL3	340351	616	CGI	FALSE	TRUE	FALSE
cg03485311	chr7	74070894	74070895	GTF2I	2969	-1134	CGI	TRUE	FALSE	FALSE
cg03592824	chr7	75666768	75666769	STYXL1	51657	10551	Non-CGI	FALSE	TRUE	FALSE
cg03870746	chr7	1068244	1068245	MIR339	442907	-5581	CGI-S-Shore	TRUE	TRUE	FALSE
cg04198139	chr7	157234129	157234130	DNAJB6	10049	104418	CGI	FALSE	FALSE	TRUE
cg04576426	chr7	148472073	148472074	CUL1	8454	77066	Non-CGI	FALSE	TRUE	FALSE
cg04897631	chr7	36453647	36453648	KIAA0895	23366	-23912	Non-CGI	FALSE	TRUE	FALSE
cg04962541	chr7	44789111	44789112	ZMIZ2	83637	930	CGI-S-Shore	FALSE	TRUE	FALSE
cg05155862	chr7	75969136	75969137	YWHAG	7532	19204	Non-CGI	FALSE	TRUE	FALSE
cg05924428	chr7	98565172	98565173	MIR3609	100500819	85898	CGI-N-Shelf	FALSE	TRUE	FALSE
cg06463109	chr7	100801566	100801567	MIR4653	100616117	-1186	CGI-S-Shelf	TRUE	TRUE	FALSE
cg06479434	chr7	128395929	128395930	CALU	813	16582	Non-CGI	FALSE	TRUE	FALSE
cg06819373	chr7	157463355	157463356	MIR153-2	406945	-96240	CGI-S-Shore	FALSE	TRUE	FALSE
cg06936290	chr7	13889871	13889872	ETV1	2115	141177	Non-CGI	FALSE	FALSE	TRUE
cg07492281	chr7	966947	966948	ADAP1	11033	48286	CGI-S-Shore	TRUE	TRUE	FALSE
cg07849009	chr7	105663410	105663411	SYPL1	6856	89645	Non-CGI	FALSE	TRUE	FALSE
cg08022244	chr7	157361759	157361760	MIR153-2	406945	5353	CGI	FALSE	TRUE	FALSE
cg08265392	chr7	151290088	151290089	RHEB	6009	-73077	Non-CGI	FALSE	TRUE	FALSE
cg08506775	chr7	100770286	100770287	SERPINE1	5054	-91	Non-CGI	TRUE	FALSE	FALSE
cg08560111	chr7	19147487	19147488	TWIST1	7291	9806	CGI	FALSE	FALSE	TRUE
cg08655844	chr7	55640714	55640715	VOPP1	81552	-513	CGI	TRUE	FALSE	FALSE
cg08817836	chr7	16955875	16955876	AGR3	155465	-34261	Non-CGI	FALSE	FALSE	TRUE
cg08938669	chr7	30174231	30174232	C7orf41	222166	-319	CGI-N-Shore	TRUE	FALSE	FALSE
cg09316347	chr7	139932132	139932133	LOC100134229	100134229	55070	CGI-S-Shore	FALSE	FALSE	TRUE
cg09416203	chr7	94928249	94928250	PON1	5444	97436	Non-CGI	FALSE	TRUE	FALSE
cg09438466	chr7	5161246	5161247	ZNF890P	645700	22929	CGI	FALSE	TRUE	FALSE
cg09696385	chr7	127528039	127528040	SND1-IT1	27099	-109521	Non-CGI	FALSE	TRUE	FALSE
cg09698220	chr7	1164030	1164031	C7orf50	84310	13861	CGI-S-Shore	FALSE	TRUE	FALSE
cg09714114	chr7	16439993	16439994	ISPD	729920	20952	CGI	FALSE	TRUE	FALSE
cg09798023	chr7	27161624	27161625	HOXA3	3200	5013	CGI-N-Shore	TRUE	TRUE	FALSE
cg09916174	chr7	134576049	134576050	AGBL3	340351	-95208	CGI-N-Shore	TRUE	TRUE	FALSE
cg10005961	chr7	151073760	151073761	WDR86-AS1	100131176	-32560	CGI	FALSE	TRUE	FALSE
cg10538202	chr7	154863338	154863339	LOC100128264	100128264	-70	CGI-S-Shore	TRUE	FALSE	FALSE
cg11464763	chr7	2044499	2044500	MIR4655	100616160	-160609	CGI	FALSE	TRUE	FALSE
cg11646259	chr7	34026657	34026658	BMPER	168667	82133	Non-CGI	FALSE	TRUE	FALSE
cg11814155	chr7	99998594	99998595	PILRA	29992	27525	Non-CGI	FALSE	TRUE	FALSE
cg11825059	chr7	14876371	14876372	DGKB	1607	66177	Non-CGI	FALSE	TRUE	FALSE
cg11967592	chr7	28725406	28725407	LOC100506497	100506497	-294175	Non-CGI	TRUE	TRUE	FALSE
cg12093519	chr7	19146441	19146442	TWIST1	7291	10852	CGI	FALSE	FALSE	TRUE
cg12128483	chr7	129691109	129691110	ZC3HC1	51530	122	CGI	TRUE	FALSE	FALSE
cg12211364	chr7	33384022	33384023	BBS9	27241	214869	Non-CGI	TRUE	TRUE	FALSE
cg12257156	chr7	158823799	158823800	LINC00689	154822	22753	CGI	FALSE	TRUE	FALSE
cg12525768	chr7	29689996	29689997	MIR550A3	100616354	30446	CGI	FALSE	TRUE	FALSE
cg12691229	chr7	149569946	149569947	ATP6V0E2	155066	-109	CGI-N-Shore	TRUE	TRUE	FALSE
cg12902183	chr7	45959833	45959834	IGFBP3	3486	1036	CGI-N-Shore	FALSE	TRUE	FALSE
cg13037895	chr7	2262292	2262293	MAD1L1	8379	10289	CGI-S-Shore	TRUE	TRUE	FALSE
cg13451242	chr7	134304526	134304527	BPGM	669	-27003	Non-CGI	FALSE	FALSE	TRUE
cg13577744	chr7	89840814	89840815	C7orf63	79846	-33672	CGI	TRUE	TRUE	FALSE
cg13639901	chr7	155556590	155556591	SHH	6469	48375	CGI	TRUE	TRUE	FALSE
cg14343652	chr7	130789013	130789014	FLJ43663	378805	5638	CGI-N-Shore	FALSE	TRUE	FALSE
cg14412967	chr7	51096971	51096972	GRB10	2887	-235811	CGI-S-Shore	FALSE	TRUE	FALSE
cg14464509	chr7	1265378	1265379	UNCX	340260	-7274	CGI-S-Shore	FALSE	FALSE	TRUE
cg14525527	chr7	51096783	51096784	GRB10	2887	-235623	CGI	FALSE	TRUE	FALSE
cg14649140	chr7	27214201	27214202	MIR196B	442920	-5018	CGI	TRUE	TRUE	FALSE
cg14757331	chr7	74211372	74211373	NCF1	653361	23062	CGI	FALSE	TRUE	FALSE
cg14785681	chr7	27223692	27223693	HOXA11	3207	1148	CGI	TRUE	TRUE	FALSE
cg14953379	chr7	141285961	141285962	AGK	55750	34882	Non-CGI	FALSE	TRUE	FALSE
cg15128917	chr7	149172002	149172003	ZNF777	27153	-13948	CGI	FALSE	TRUE	FALSE
cg15454385	chr7	556429	556430	PDGFA	5154	3050	CGI	FALSE	TRUE	FALSE
cg15893346	chr7	65447565	65447566	GUSB	2990	-263	CGI-S-Shore	TRUE	FALSE	FALSE
cg16224671	chr7	23146217	23146218	KLHL7	55975	863	CGI	TRUE	TRUE	FALSE
cg16539433	chr7	131888700	131888701	PLXNA4	91584	444745	Non-CGI	FALSE	TRUE	FALSE
cg16553024	chr7	116138462	116138463	MET	4233	-173995	CGI-N-Shore	TRUE	TRUE	FALSE
cg17450930	chr7	150065170	150065171	REPIN1	29803	-189	CGI-N-Shore	TRUE	FALSE	FALSE
cg17550566	chr7	2681436	2681437	TTYH3	80727	9832	CGI	FALSE	TRUE	FALSE
cg18442362	chr7	44677772	44677773	OGDH	4967	31650	Non-CGI	FALSE	TRUE	FALSE
cg18496858	chr7	116923473	116923474	WNT2	7472	39868	Non-CGI	FALSE	TRUE	FALSE
cg18947550	chr7	158756601	158756602	LINC00689	154822	-44442	CGI-S-Shelf	FALSE	FALSE	TRUE
cg19800407	chr7	103790855	103790856	ORC5	5001	57638	Non-CGI	FALSE	TRUE	FALSE
cg20458896	chr7	101847657	101847658	SH2B2	10603	-80746	CGI	FALSE	TRUE	FALSE
cg20899053	chr7	156803197	156803198	MNX1	3110	148	CGI	TRUE	FALSE	FALSE
cg21367783	chr7	4775278	4775279	AP5Z1	9907	-39982	CGI	FALSE	TRUE	FALSE
cg21526773	chr7	2240322	2240323	MAD1L1	8379	32259	CGI	FALSE	TRUE	FALSE
cg21572621	chr7	28998069	28998070	LOC100506497	100506497	-21512	CGI	TRUE	FALSE	FALSE
cg21785034	chr7	142494439	142494440	PRSS3P2	154754	15681	CGI	TRUE	TRUE	FALSE
cg21897367	chr7	142759657	142759658	OR6W1P	89883	1223	Non-CGI	TRUE	FALSE	FALSE
cg22362802	chr7	100859461	100859462	ZNHIT1	10467	-1522	CGI-N-Shore	TRUE	TRUE	FALSE
cg22387890	chr7	6145595	6145596	USP42	84132	1044	CGI-S-Shore	FALSE	TRUE	FALSE
cg22498251	chr7	19157710	19157711	TWIST1	7291	-414	CGI	TRUE	FALSE	FALSE
cg22541336	chr7	32106580	32106581	PDE1C	5137	231801	CGI-N-Shelf	FALSE	TRUE	FALSE
cg22891003	chr7	537740	537741	PDGFA	5154	21739	CGI	FALSE	TRUE	FALSE
cg23043143	chr7	2612101	2612102	IQCE	23288	13468	CGI	FALSE	TRUE	FALSE
cg23155118	chr7	32983012	32983013	RP9P	441212	-229	CGI-S-Shore	TRUE	TRUE	FALSE
cg23603376	chr7	19147382	19147383	TWIST1	7291	9911	CGI	FALSE	FALSE	TRUE
cg23697861	chr7	6616078	6616079	ZDHHC4	55146	-985	CGI-N-Shore	TRUE	FALSE	FALSE
cg23719508	chr7	2623999	2624000	IQCE	23288	25366	CGI	FALSE	TRUE	FALSE
cg23884358	chr7	184010	184011	FAM20C	56975	-8957	CGI	FALSE	FALSE	TRUE
cg24143766	chr7	97846988	97846989	BHLHA15	168620	5419	CGI-N-Shore	FALSE	TRUE	FALSE
cg24228819	chr7	136553868	136553869	CHRM2	1129	468	CGI	TRUE	TRUE	FALSE
cg24381682	chr7	45961419	45961420	IGFBP3	3486	-547	CGI	TRUE	FALSE	FALSE
cg24434368	chr7	116593263	116593264	ST7	7982	-116	CGI	TRUE	FALSE	FALSE
cg25815219	chr7	31827390	31827391	PPP1R17	10842	100758	Non-CGI	TRUE	TRUE	FALSE
cg25826546	chr7	100770060	100770061	SERPINE1	5054	-317	Non-CGI	TRUE	FALSE	FALSE
cg25906711	chr7	73249124	73249125	CLDN4	1364	3930	CGI-N-Shore	FALSE	TRUE	FALSE
cg26050906	chr7	50800202	50800203	GRB10	2887	60955	Non-CGI	TRUE	TRUE	FALSE
cg26441104	chr7	90822169	90822170	FZD1	8321	-71612	Non-CGI	FALSE	TRUE	FALSE
cg26463171	chr7	116105259	116105260	CAV1	857	175352	Non-CGI	FALSE	TRUE	FALSE
cg26918117	chr7	101603298	101603299	CUX1	1523	144113	CGI	FALSE	TRUE	FALSE
cg26951410	chr7	2317124	2317125	NUDT1	4521	35266	CGI	FALSE	TRUE	FALSE
cg27193735	chr7	90562815	90562816	FZD1	8321	-330966	Non-CGI	FALSE	TRUE	FALSE
ch.7.1264585R	chr7	55212640	55212642	EGFR	1956	125914	Non-CGI	FALSE	TRUE	FALSE
cg00093542	chr8	27144453	27144454	TRIM35	23087	24379	CGI-N-Shore	FALSE	TRUE	FALSE
cg00871453	chr8	124084640	124084641	WDR67	93594	-278	CGI	TRUE	FALSE	FALSE
cg00997969	chr8	30350644	30350645	RBPMS	11030	108699	Non-CGI	FALSE	TRUE	FALSE
cg01554383	chr8	74788931	74788932	UBE2W	55284	2177	CGI-N-Shore	FALSE	TRUE	FALSE
cg01580655	chr8	10649960	10649961	MIR1322	100302166	32991	Non-CGI	FALSE	TRUE	FALSE
cg01942003	chr8	144776547	144776548	BREA2	286076	-2736	CGI	FALSE	TRUE	FALSE
cg02243522	chr8	129061054	129061055	MIR1207	100302175	-342	Non-CGI	TRUE	TRUE	FALSE
cg02502679	chr8	80856224	80856225	MRPS28	28957	86280	Non-CGI	FALSE	TRUE	FALSE
cg02840697	chr8	24861141	24861142	NEFL	4747	-47009	CGI-S-Shore	FALSE	FALSE	TRUE
cg04600798	chr8	145640322	145640323	SLC39A4	55630	1949	CGI-S-Shore	TRUE	TRUE	FALSE
cg04610985	chr8	20237098	20237099	LZTS1	11178	-124294	Non-CGI	FALSE	FALSE	TRUE
cg04619120	chr8	62520228	62520229	ASPH	444	106969	Non-CGI	FALSE	TRUE	FALSE
cg05318516	chr8	37412156	37412157	ZNF703	80139	-141143	Non-CGI	FALSE	FALSE	TRUE
cg06050341	chr8	124552839	124552840	FBXO32	114907	652	CGI	FALSE	TRUE	FALSE
cg06070421	chr8	100026087	100026088	VPS13B	157680	592	CGI-S-Shore	TRUE	TRUE	FALSE
cg06441024	chr8	43059519	43059520	HGSNAT	138050	63926	CGI	FALSE	FALSE	TRUE
cg07216194	chr8	27182965	27182966	PTK2B	2185	13965	CGI-N-Shore	TRUE	TRUE	FALSE
cg07428430	chr8	1830352	1830353	ARHGEF10	9639	58202	CGI	TRUE	TRUE	FALSE
cg07560087	chr8	125739038	125739039	MTSS1	9788	1690	CGI-N-Shore	FALSE	TRUE	FALSE
cg07748154	chr8	23299120	23299121	ENTPD4	9583	16122	Non-CGI	FALSE	TRUE	FALSE
cg09498948	chr8	93116100	93116101	RUNX1T1	862	-645	CGI-S-Shore	TRUE	FALSE	FALSE
cg10064585	chr8	142186995	142186996	DENND3	22898	48274	CGI	FALSE	TRUE	FALSE
cg10210397	chr8	42410091	42410092	SLC20A2	6575	-13022	Non-CGI	FALSE	FALSE	TRUE
cg10239077	chr8	55294882	55294883	SOX17	64321	-75611	CGI	FALSE	FALSE	TRUE
cg10591701	chr8	133787386	133787387	PHF20L1	51105	-216	CGI-N-Shore	TRUE	FALSE	FALSE
cg11137615	chr8	69244343	69244344	LOC286189	286189	-616	CGI-S-Shore	TRUE	TRUE	FALSE
cg11209200	chr8	66635187	66635188	MTFR1	9650	78298	Non-CGI	FALSE	TRUE	FALSE
cg11947493	chr8	23021515	23021516	TNFRSF10D	8793	23	CGI	TRUE	FALSE	FALSE
cg12076863	chr8	99129132	99129133	HRSP12	10247	284	CGI-N-Shore	TRUE	TRUE	FALSE
cg12461568	chr8	122654231	122654232	HAS2	3037	-600	CGI	TRUE	TRUE	FALSE
cg13246007	chr8	17886267	17886268	ASAH1	427	56238	Non-CGI	FALSE	TRUE	FALSE
cg14193430	chr8	77806227	77806228	PEX2	5828	107051	Non-CGI	FALSE	FALSE	TRUE
cg14317001	chr8	144462776	144462777	RHPN1	114822	11750	CGI	FALSE	TRUE	FALSE
cg14733048	chr8	109095782	109095783	RSPO2	340419	129	CGI	TRUE	FALSE	FALSE
cg14737507	chr8	71135321	71135322	PRDM14	63978	-151758	Non-CGI	FALSE	TRUE	FALSE
cg14864369	chr8	99007318	99007319	SNORA72	26775	47125	Non-CGI	FALSE	TRUE	FALSE
cg15412102	chr8	12809642	12809643	KIAA1456	57604	6490	CGI-S-Shore	FALSE	TRUE	FALSE
cg16027376	chr8	144653975	144653976	MROH6	642475	951	CGI-S-Shore	FALSE	TRUE	FALSE
cg16623157	chr8	48385636	48385637	KIAA0146	23514	212146	Non-CGI	FALSE	TRUE	FALSE
cg16659043	chr8	119634612	119634613	SAMD12	401474	-377	CGI	TRUE	TRUE	FALSE
cg17103638	chr8	41542140	41542141	MIR486	619554	-24113	Non-CGI	FALSE	TRUE	FALSE
cg17477578	chr8	129552914	129552915	MIR1208	100302281	390551	Non-CGI	FALSE	FALSE	TRUE
cg18200385	chr8	145704685	145704686	FOXH1	8928	-2966	CGI-S-Shore	FALSE	FALSE	TRUE
cg18234130	chr8	27182889	27182890	PTK2B	2185	13889	CGI-N-Shore	TRUE	TRUE	FALSE
cg18794473	chr8	77617694	77617695	ZFHX4-AS1	100192378	-22183	CGI	TRUE	TRUE	FALSE
cg19106326	chr8	38575349	38575350	TACC1	6867	-10353	CGI-N-Shelf	FALSE	FALSE	TRUE
cg19128026	chr8	1792615	1792616	ARHGEF10	9639	20465	CGI-N-Shore	FALSE	TRUE	FALSE
cg19301681	chr8	141629876	141629877	2002-08-01	27161	15768	CGI	FALSE	TRUE	FALSE
cg19435547	chr8	141275160	141275161	TRAPPC9	83696	193516	Non-CGI	FALSE	TRUE	FALSE
cg19920183	chr8	81806219	81806220	ZNF704	619279	-19202	CGI	FALSE	FALSE	TRUE
cg20162696	chr8	102167694	102167695	ZNF706	51123	50264	Non-CGI	FALSE	FALSE	TRUE
cg20511966	chr8	141361266	141361267	TRAPPC9	83696	107410	CGI	FALSE	TRUE	FALSE
cg20769102	chr8	101162761	101162762	POLR2K	5440	-76	CGI-S-Shore	TRUE	FALSE	FALSE
cg21189492	chr8	42395162	42395163	C8orf40	114926	-1134	CGI-N-Shore	TRUE	TRUE	FALSE
cg21225797	chr8	110988248	110988249	KCNV1	27012	-171	CGI-S-Shore	TRUE	FALSE	FALSE
cg21234195	chr8	144489782	144489783	MAFA	389692	22818	CGI	FALSE	FALSE	TRUE
cg21745256	chr8	141520726	141520727	CHRAC1	54108	-669	CGI	TRUE	FALSE	FALSE
cg22454022	chr8	69646661	69646662	LOC100505718	100505718	369762	Non-CGI	FALSE	TRUE	FALSE
cg22727581	chr8	24812784	24812785	NEFL	4747	1345	CGI	FALSE	TRUE	FALSE
cg22783363	chr8	23021553	23021554	TNFRSF10D	8793	-12	CGI	TRUE	FALSE	FALSE
cg22851271	chr8	67340497	67340498	LOC100505676	100505676	713	CGI	TRUE	TRUE	FALSE
cg23138413	chr8	49320596	49320597	EFCAB1	79645	327272	Non-CGI	FALSE	FALSE	TRUE
cg23139584	chr8	56987506	56987507	RPS20	6224	-365	CGI-S-Shore	TRUE	FALSE	FALSE
cg23298114	chr8	118933411	118933412	EXT1	2131	190645	Non-CGI	FALSE	TRUE	FALSE
cg24811472	chr8	26481806	26481807	DPYSL2	1808	110096	Non-CGI	FALSE	TRUE	FALSE
cg25193323	chr8	125437986	125437987	TRMT12	55039	-25060	Non-CGI	FALSE	FALSE	TRUE
cg25229089	chr8	72984967	72984968	TRPA1	8989	2850	CGI-N-Shelf	FALSE	TRUE	FALSE
cg25766247	chr8	59714165	59714166	NSMAF	8439	-141760	Non-CGI	FALSE	FALSE	TRUE
cg25777549	chr8	25902400	25902401	EBF2	64641	238	CGI-S-Shore	TRUE	TRUE	FALSE
cg25876817	chr8	1382345	1382346	DLGAP2	9228	-67222	CGI-S-Shore	FALSE	FALSE	TRUE
cg26205981	chr8	24856821	24856822	NEFL	4747	-42689	CGI-N-Shore	FALSE	FALSE	TRUE
cg26407100	chr8	11726043	11726044	CTSB	1508	-396	CGI	TRUE	FALSE	FALSE
cg26535606	chr8	103664166	103664167	KLF10	7071	3815	CGI-N-Shore	FALSE	TRUE	FALSE
cg26753608	chr8	128938630	128938631	MIR1205	100302161	-34247	Non-CGI	FALSE	TRUE	FALSE
cg26848524	chr8	55294566	55294567	SOX17	64321	-75927	CGI-N-Shore	FALSE	FALSE	TRUE
cg02066682	chr9	79634037	79634038	FOXB2	442425	-532	CGI	TRUE	FALSE	FALSE
cg04038844	chr9	110399688	110399689	KLF4	9314	-147640	CGI-N-Shore	FALSE	FALSE	TRUE
cg04965820	chr9	129374235	129374236	LMX1B	4010	-2485	CGI	FALSE	FALSE	TRUE
cg05840553	chr9	130212635	130212636	RPL12	6136	1074	CGI-N-Shore	TRUE	TRUE	FALSE
cg06412582	chr9	138986379	138986380	NACC2	138151	750	CGI	FALSE	TRUE	FALSE
cg13595518	chr9	124413528	124413529	DAB2IP	153090	84128	CGI-N-Shore	FALSE	TRUE	FALSE
cg13667655	chr9	77707358	77707359	OSTF1	26578	3959	CGI-S-Shelf	FALSE	TRUE	FALSE
cg13744150	chr9	114394323	114394324	DNAJC25	548645	690	CGI-S-Shore	FALSE	TRUE	FALSE
cg13968218	chr9	127216047	127216048	GPR144	347088	2623	CGI	FALSE	TRUE	FALSE
cg13985445	chr9	90340577	90340578	CTSL1	1514	-395	CGI	TRUE	FALSE	FALSE
cg14187972	chr9	135013169	135013170	NTNG2	84628	-24163	CGI-N-Shelf	FALSE	FALSE	TRUE
cg14218480	chr9	139842749	139842750	LCN12	286256	-1252	CGI-N-Shore	TRUE	FALSE	FALSE
cg14234340	chr9	34127905	34127906	DCAF12	25853	-1133	CGI-S-Shore	TRUE	FALSE	FALSE
cg14278321	chr9	133558104	133558105	EXOSC2	23404	-11052	CGI	FALSE	TRUE	FALSE
cg14396035	chr9	35096980	35096981	PIGO	84720	-381	CGI-S-Shore	TRUE	FALSE	FALSE
cg14419310	chr9	85677330	85677331	RASEF	158158	711	CGI	FALSE	TRUE	FALSE
cg14457452	chr9	123257038	123257039	CDK5RAP2	55755	85397	CGI-N-Shore	FALSE	TRUE	FALSE
cg14502847	chr9	18490009	18490010	ADAMTSL1	92949	15929	Non-CGI	FALSE	TRUE	FALSE
cg14536239	chr9	128278422	128278423	MAPKAP1	79109	191089	Non-CGI	FALSE	TRUE	FALSE
cg14537247	chr9	126656547	126656548	DENND1A	57706	35868	Non-CGI	TRUE	TRUE	FALSE
cg14585967	chr9	118135710	118135711	DEC1	50514	231612	Non-CGI	FALSE	TRUE	FALSE
cg14655843	chr9	114688737	114688738	MIR4668	100616114	-5641	Non-CGI	FALSE	TRUE	FALSE
cg15067376	chr9	139257843	139257844	DNLZ	728489	396	CGI	FALSE	TRUE	FALSE
cg17301902	chr9	80263219	80263220	GNA14	9630	11	CGI	TRUE	FALSE	FALSE
cg20093661	chr9	140437771	140437772	PNPLA7	375775	7213	CGI	FALSE	TRUE	FALSE
cg20752438	chr9	35829112	35829113	TMEM8B	51754	-108	CGI	TRUE	FALSE	FALSE
cg21158781	chr9	82299929	82299930	TLE4	7091	113050	Non-CGI	FALSE	TRUE	FALSE
cg21190361	chr9	34459060	34459061	DNAI1	27019	248	CGI-S-Shore	TRUE	TRUE	FALSE
cg24293588	chr9	130186114	130186115	ZNF79	7633	-537	CGI-N-Shore	TRUE	FALSE	FALSE
cg00238318	chr10	94607950	94607951	EXOC6	54536	17014	CGI	TRUE	TRUE	FALSE
cg00291159	chr10	71389949	71389950	C10orf35	219738	-52	CGI	TRUE	FALSE	FALSE
cg00296121	chr10	13933247	13933248	PRPF18	8559	304307	CGI	FALSE	TRUE	FALSE
cg00595223	chr10	133879183	133879184	JAKMIP3	282973	-39128	CGI	FALSE	FALSE	TRUE
cg00636809	chr10	64577607	64577608	EGR2	1959	1318	CGI	TRUE	TRUE	FALSE
cg00780540	chr10	553457	553458	PRR26	414235	-142429	CGI	FALSE	TRUE	FALSE
cg00873937	chr10	69991564	69991565	ATOH7	220202	304	CGI	TRUE	FALSE	FALSE
cg00950497	chr10	116393423	116393424	ABLIM1	3983	134594	CGI-S-Shore	TRUE	TRUE	FALSE
cg01466017	chr10	17496720	17496721	ST8SIA6	338596	-465	CGI	TRUE	FALSE	FALSE
cg01816336	chr10	89265204	89265205	MINPP1	9562	980	CGI	TRUE	FALSE	FALSE
cg02827958	chr10	1099945	1099946	WDR37	22884	-2397	CGI-N-Shelf	FALSE	TRUE	FALSE
cg03000869	chr10	72059799	72059800	NPFFR1	64106	-16348	Non-CGI	FALSE	TRUE	FALSE
cg03037366	chr10	75012760	75012761	MRPS16	51021	-308	CGI	TRUE	TRUE	FALSE
cg03341641	chr10	49810606	49810607	ARHGAP22	58504	53702	CGI-N-Shelf	FALSE	TRUE	FALSE
cg03376308	chr10	3497811	3497812	PITRM1	10531	-282777	CGI-N-Shore	FALSE	TRUE	FALSE
cg03576422	chr10	28824551	28824552	WAC-AS1	220906	-3090	CGI-S-Shore	FALSE	TRUE	FALSE
cg03830401	chr10	70812585	70812586	SRGN	5552	-35241	Non-CGI	FALSE	FALSE	TRUE
cg04045419	chr10	28823091	28823092	WAC-AS1	220906	-1630	CGI	TRUE	TRUE	FALSE
cg04617948	chr10	129535138	129535139	FOXI2	399823	-398	CGI	TRUE	FALSE	FALSE
cg04733302	chr10	75118678	75118679	TTC18	118491	-60	CGI	TRUE	FALSE	FALSE
cg04873514	chr10	16478613	16478614	PTER	9317	-352	CGI	TRUE	FALSE	FALSE
cg05355436	chr10	63520873	63520874	C10orf107	219621	98153	Non-CGI	FALSE	TRUE	FALSE
cg06075311	chr10	105210937	105210938	CALHM2	51063	1719	CGI-N-Shore	TRUE	TRUE	FALSE
cg06422108	chr10	31610399	31610400	ZEB1-AS1	220930	-2374	CGI-S-Shore	TRUE	TRUE	FALSE
cg06451536	chr10	133767572	133767573	PPP2R2D	55844	19611	CGI	FALSE	TRUE	FALSE
cg06511701	chr10	22915590	22915591	PIP4K2A	5305	87911	Non-CGI	FALSE	TRUE	FALSE
cg06731125	chr10	21462653	21462654	NEBL	10529	461	CGI	FALSE	TRUE	FALSE
cg06790044	chr10	30323377	30323378	KIAA1462	57608	81041	Non-CGI	FALSE	TRUE	FALSE
cg06971773	chr10	71169083	71169084	TACR2	6865	7589	CGI-S-Shore	TRUE	TRUE	FALSE
cg07103504	chr10	120514672	120514673	CACUL1	143384	84	CGI	TRUE	FALSE	FALSE
cg08441475	chr10	127452066	127452067	MMP21	118856	12322	Non-CGI	FALSE	TRUE	FALSE
cg08612140	chr10	103543472	103543473	NPM3	10360	-301	CGI-S-Shore	TRUE	FALSE	FALSE
cg09301734	chr10	17495810	17495811	ST8SIA6	338596	442	CGI	FALSE	TRUE	FALSE
cg09622269	chr10	76803925	76803926	DUPD1	338599	14345	CGI-S-Shore	FALSE	TRUE	FALSE
cg09875661	chr10	3143354	3143355	PFKP	5214	33641	CGI	FALSE	TRUE	FALSE
cg10013645	chr10	35501529	35501530	CCNY	219771	-34422	CGI-N-Shelf	FALSE	TRUE	FALSE
cg10223233	chr10	64373395	64373396	ADO	84890	-191119	Non-CGI	FALSE	TRUE	FALSE
cg10224216	chr10	104210016	104210017	LOC100505761	100505761	441	CGI	TRUE	TRUE	FALSE
cg10314760	chr10	123353654	123353655	FGFR2	2263	4316	CGI-N-Shore	TRUE	TRUE	FALSE
cg10612915	chr10	97393449	97393450	ALDH18A1	5832	23116	Non-CGI	FALSE	TRUE	FALSE
cg11148307	chr10	134671663	134671664	NKX6-2	84504	-72125	CGI	FALSE	TRUE	FALSE
cg11310017	chr10	134062078	134062079	DPYSL4	10570	61663	CGI-N-Shore	FALSE	TRUE	FALSE
cg11647108	chr10	81967516	81967517	LINC00857	439990	49	CGI	TRUE	FALSE	FALSE
cg11839566	chr10	129090134	129090135	FAM196A	642938	-95711	Non-CGI	FALSE	TRUE	FALSE
cg11860238	chr10	134726665	134726666	NA	255352	29422	CGI	FALSE	TRUE	FALSE
cg12326923	chr10	134277889	134277890	C10orf91	170393	19174	CGI-N-Shore	FALSE	FALSE	TRUE
cg13456138	chr10	90753195	90753196	FAS-AS1	100302740	-462	CGI-S-Shore	TRUE	TRUE	FALSE
cg13848707	chr10	70321243	70321244	TET1	80312	1125	CGI	FALSE	TRUE	FALSE
cg14302224	chr10	105210980	105210981	CALHM2	51063	1676	CGI-N-Shore	TRUE	TRUE	FALSE
cg14526953	chr10	134901975	134901976	GPR123	84435	17541	CGI-S-Shore	FALSE	TRUE	FALSE
cg14614581	chr10	73844130	73844131	SPOCK2	9806	4658	CGI-N-Shelf	FALSE	TRUE	FALSE
cg14672137	chr10	13931052	13931053	PRPF18	8559	302112	CGI-N-Shore	FALSE	TRUE	FALSE
cg14765206	chr10	101744219	101744220	DNMBP	23268	25455	Non-CGI	FALSE	TRUE	FALSE
cg14816861	chr10	78675431	78675432	KCNMA1	3778	722144	Non-CGI	FALSE	TRUE	FALSE
cg15318570	chr10	22726874	22726875	LOC100499489	100499489	-15	CGI-S-Shore	TRUE	FALSE	FALSE
cg15439196	chr10	104676907	104676908	CNNM2	54805	-1166	CGI-N-Shore	TRUE	FALSE	FALSE
cg16241204	chr10	112071452	112071453	SMNDC1	10285	-6744	Non-CGI	FALSE	FALSE	TRUE
cg16380876	chr10	129785053	129785054	PTPRE	5791	79727	Non-CGI	TRUE	TRUE	FALSE
cg16489259	chr10	32438418	32438419	KIF5B	3799	-93046	Non-CGI	FALSE	FALSE	TRUE
cg16653534	chr10	49716328	49716329	ARHGAP22	58504	147980	Non-CGI	FALSE	TRUE	FALSE
cg16739342	chr10	12221327	12221328	CDC123	8872	-16632	Non-CGI	FALSE	TRUE	FALSE
cg16748694	chr10	126754386	126754387	MIR4296	100423041	-32946	CGI-S-Shelf	FALSE	TRUE	FALSE
cg16751329	chr10	126305849	126305850	LHPP	64077	155507	CGI	FALSE	TRUE	FALSE
cg16787600	chr10	106400880	106400881	SORCS3	22986	20	CGI-S-Shore	TRUE	FALSE	FALSE
cg17011709	chr10	94826053	94826054	CYP26C1	340665	5031	CGI	FALSE	TRUE	FALSE
cg17452301	chr10	134211620	134211621	PWWP2B	170394	917	CGI	FALSE	TRUE	FALSE
cg17853216	chr10	81002480	81002481	PPIF	10105	-104738	CGI	TRUE	TRUE	FALSE
cg17886654	chr10	90683002	90683003	STAMBPL1	57559	42975	Non-CGI	FALSE	TRUE	FALSE
cg17958516	chr10	80952606	80952607	ZMIZ1	57178	123813	Non-CGI	FALSE	TRUE	FALSE
cg18005828	chr10	120031911	120031912	FAM204A	63877	69926	Non-CGI	FALSE	FALSE	TRUE
cg18543130	chr10	116701397	116701398	TRUB1	142940	3481	CGI-S-Shelf	FALSE	TRUE	FALSE
cg18802022	chr10	100162831	100162832	MIR1287	100302133	-7766	CGI	FALSE	TRUE	FALSE
cg18918390	chr10	21605038	21605039	NEBL	10529	-141921	Non-CGI	FALSE	FALSE	TRUE
cg19685285	chr10	50010529	50010530	LRRC18	474354	111749	Non-CGI	TRUE	TRUE	FALSE
cg20184056	chr10	64323709	64323710	ADO	84890	-240805	Non-CGI	FALSE	TRUE	FALSE
cg20340720	chr10	104512523	104512524	WBP1L	54838	8795	Non-CGI	FALSE	TRUE	FALSE
cg20506783	chr10	49813412	49813413	ARHGAP22	58504	50896	CGI-S-Shore	TRUE	TRUE	FALSE
cg20598295	chr10	35099208	35099209	PARD3	56288	5043	CGI-N-Shelf	FALSE	TRUE	FALSE
cg20621021	chr10	72163541	72163542	EIF4EBP2	1979	-318	CGI-N-Shore	TRUE	FALSE	FALSE
cg21508714	chr10	112432393	112432394	RBM20	282996	28237	CGI-S-Shore	FALSE	TRUE	FALSE
cg22737985	chr10	71812168	71812169	H2AFY2	55506	-187	CGI	TRUE	FALSE	FALSE
cg22802366	chr10	134539909	134539910	NKX6-2	84504	59626	CGI	FALSE	TRUE	FALSE
cg23014871	chr10	43656166	43656167	CSGALNACT2	55454	22231	Non-CGI	FALSE	TRUE	FALSE
cg23705728	chr10	16564620	16564621	C1QL3	389941	-615	CGI-S-Shore	TRUE	FALSE	FALSE
cg23736728	chr10	134359751	134359752	INPP5A	3632	8397	CGI	FALSE	TRUE	FALSE
cg24386905	chr10	372859	372860	ZMYND11	10771	192453	CGI	FALSE	TRUE	FALSE
cg24640390	chr10	71336969	71336970	NEUROG3	50674	-3758	CGI	FALSE	FALSE	TRUE
cg24789723	chr10	102501346	102501347	PAX2	5076	-4120	CGI-S-Shore	FALSE	FALSE	TRUE
cg25453664	chr10	13933021	13933022	PRPF18	8559	304081	CGI	FALSE	TRUE	FALSE
cg25961733	chr10	134228239	134228240	PWWP2B	170394	17536	CGI-S-Shore	FALSE	TRUE	FALSE
cg26080545	chr10	15174924	15174925	PPIAP30	100192204	22420	Non-CGI	FALSE	TRUE	FALSE
cg26185379	chr10	91192088	91192089	LIPA	3988	-17705	Non-CGI	FALSE	TRUE	FALSE
cg26485946	chr10	1094306	1094307	WDR37	22884	-8036	CGI	TRUE	TRUE	FALSE
cg26562141	chr10	126805095	126805096	CTBP2	1488	44527	Non-CGI	FALSE	TRUE	FALSE
cg26568031	chr10	91313380	91313381	SLC16A12	387700	-18066	Non-CGI	FALSE	FALSE	TRUE
cg26640901	chr10	104536035	104536036	WBP1L	54838	32307	Non-CGI	TRUE	TRUE	FALSE
cg26699283	chr10	71892715	71892716	AIFM2	84883	-24	CGI	TRUE	FALSE	FALSE
cg27040468	chr10	60456715	60456716	FAM133CP	728640	-18058	Non-CGI	FALSE	TRUE	FALSE
cg27649073	chr10	104001259	104001260	PITX3	5309	-27	CGI	TRUE	FALSE	FALSE
cg00211661	chr11	72433619	72433620	PDE2A	5138	-48121	Non-CGI	TRUE	TRUE	FALSE
cg01078048	chr11	46935970	46935971	LRP4	4038	4201	CGI-N-Shelf	FALSE	TRUE	FALSE
cg01170276	chr11	64614859	64614860	CDC42BPG	55561	-2817	CGI-S-Shelf	FALSE	FALSE	TRUE
cg01292299	chr11	18008039	18008040	SERGEF	26297	26596	Non-CGI	FALSE	TRUE	FALSE
cg01591227	chr11	62538535	62538536	TAF6L	10629	-238	CGI	TRUE	FALSE	FALSE
cg01853079	chr11	108370607	108370608	KDELC2	143888	-1447	CGI-S-Shore	TRUE	FALSE	FALSE
cg02101355	chr11	121970694	121970695	MIR125B1	406911	-141	CGI-N-Shore	TRUE	TRUE	FALSE
cg03067994	chr11	102827000	102827001	MMP13	4322	-536	Non-CGI	TRUE	FALSE	FALSE
cg03148427	chr11	120110787	120110788	POU2F3	25833	3437	CGI	TRUE	TRUE	FALSE
cg03286387	chr11	1891050	1891051	MIR4298	100423021	-10283	CGI-S-Shore	TRUE	TRUE	FALSE
cg03402926	chr11	27340767	27340768	CCDC34	91057	44026	Non-CGI	FALSE	FALSE	TRUE
cg03891346	chr11	121970725	121970726	MIR125B1	406911	-172	CGI-N-Shore	TRUE	TRUE	FALSE
cg04287216	chr11	5700884	5700885	TRIM22	10346	-9931	CGI-N-Shelf	FALSE	TRUE	FALSE
cg04999352	chr11	63304614	63304615	RARRES3	5920	340	Non-CGI	FALSE	TRUE	FALSE
cg05065879	chr11	123229471	123229472	MIR4493	100616319	22747	CGI	FALSE	FALSE	TRUE
cg05466223	chr11	17158572	17158573	RPS13	6207	-59351	Non-CGI	FALSE	TRUE	FALSE
cg05524450	chr11	43598232	43598233	MIR129-2	406918	-4710	CGI	FALSE	FALSE	TRUE
cg05532892	chr11	14666436	14666437	PDE3B	5140	1166	CGI	TRUE	FALSE	FALSE
cg05585544	chr11	47624801	47624802	C1QTNF4	114900	-8839	Non-CGI	FALSE	FALSE	TRUE
cg05659420	chr11	593494	593495	PHRF1	57661	17010	CGI	FALSE	TRUE	FALSE
cg07329251	chr11	10476662	10476663	AMPD3	272	4793	CGI-S-Shelf	TRUE	TRUE	FALSE
cg07438103	chr11	47175143	47175144	ARFGAP2	84364	23531	Non-CGI	FALSE	TRUE	FALSE
cg07589064	chr11	65585931	65585932	SNX32	254122	-15477	CGI	FALSE	FALSE	TRUE
cg08036798	chr11	76839191	76839192	MYO7A	4647	-117	Non-CGI	TRUE	FALSE	FALSE
cg09449150	chr11	129731815	129731816	NFRKB	4798	33673	Non-CGI	FALSE	FALSE	TRUE
cg09851528	chr11	117778029	117778030	TMPRSS13	84000	22137	Non-CGI	FALSE	TRUE	FALSE
cg09873946	chr11	112132648	112132649	C11orf34	349633	-1064	Non-CGI	TRUE	TRUE	FALSE
cg10256976	chr11	20078682	20078683	DBX1	120237	103186	Non-CGI	FALSE	TRUE	FALSE
cg10687644	chr11	72527565	72527566	ATG16L2	89849	2113	CGI-S-Shore	FALSE	TRUE	FALSE
cg11122453	chr11	44981188	44981189	TP53I11	9537	-8347	CGI-S-Shelf	FALSE	FALSE	TRUE
cg11295902	chr11	64546368	64546369	SF1	7536	-51	CGI	TRUE	FALSE	FALSE
cg11466713	chr11	61488235	61488236	MYRF	745	-31884	Non-CGI	FALSE	TRUE	FALSE
cg11493596	chr11	129939049	129939050	APLP2	334	-665	CGI	TRUE	FALSE	FALSE
cg12122877	chr11	120857123	120857124	TBCEL	219899	-37678	CGI	FALSE	FALSE	TRUE
cg12155547	chr11	65194965	65194966	NEAT1	283131	4695	CGI-S-Shelf	TRUE	FALSE	FALSE
cg13173567	chr11	9172290	9172291	KRT8P41	283102	56379	Non-CGI	FALSE	TRUE	FALSE
cg13193591	chr11	120377997	120377998	GRIK4	2900	-4469	CGI-N-Shelf	FALSE	FALSE	TRUE
cg13255440	chr11	120461641	120461642	GRIK4	2900	79172	Non-CGI	FALSE	TRUE	FALSE
cg13606889	chr11	121335457	121335458	SORL1	6653	12544	Non-CGI	FALSE	TRUE	FALSE
cg13686012	chr11	101000655	101000656	PGR	5241	-110	CGI-S-Shore	TRUE	TRUE	FALSE
cg14076394	chr11	132458009	132458010	OPCML	4978	944392	Non-CGI	FALSE	TRUE	FALSE
cg14145762	chr11	111945650	111945651	C11orf57	55216	681	CGI-S-Shore	TRUE	TRUE	FALSE
cg14189304	chr11	47236932	47236933	DDB2	1643	438	CGI	TRUE	TRUE	FALSE
cg14215748	chr11	14522100	14522101	COPB1	1315	-658	CGI-S-Shore	TRUE	TRUE	FALSE
cg15083015	chr11	20625714	20625715	SLC6A5	9152	4767	CGI-N-Shore	FALSE	TRUE	FALSE
cg15115583	chr11	118042630	118042631	SCN2B	6327	4705	CGI-S-Shore	FALSE	TRUE	FALSE
cg15166492	chr11	119294705	119294706	THY1	7070	-458	CGI-S-Shore	TRUE	TRUE	FALSE
cg15920975	chr11	65194933	65194934	NEAT1	283131	4663	CGI-S-Shelf	TRUE	FALSE	FALSE
cg16129132	chr11	3182119	3182120	OSBPL5	114879	5848	CGI-S-Shore	FALSE	TRUE	FALSE
cg16174121	chr11	47736254	47736255	AGBL2	79841	672	CGI-N-Shore	TRUE	TRUE	FALSE
cg16423756	chr11	122526190	122526191	UBASH3B	84959	-206	CGI-N-Shore	TRUE	FALSE	FALSE
cg16578226	chr11	126055303	126055304	RPUSD4	84881	26282	CGI	FALSE	FALSE	TRUE
cg16713321	chr11	73577813	73577814	COA4	51287	10075	Non-CGI	FALSE	FALSE	TRUE
cg16828648	chr11	3829487	3829488	NUP98	4928	-10464	CGI	TRUE	TRUE	FALSE
cg16950941	chr11	66035639	66035640	RAB1B	81876	-415	CGI	TRUE	FALSE	FALSE
cg17501754	chr11	1891699	1891700	MIR4298	100423021	-10932	CGI-S-Shore	TRUE	TRUE	FALSE
cg17568039	chr11	70980922	70980923	SHANK2	22941	-45079	Non-CGI	FALSE	FALSE	TRUE
cg18089569	chr11	14996490	14996491	CALCA	796	-2657	CGI	FALSE	FALSE	TRUE
cg18224729	chr11	57559066	57559067	CTNND1	1500	38350	Non-CGI	TRUE	TRUE	FALSE
cg18430624	chr11	10326585	10326586	ADM	133	-55	CGI	TRUE	FALSE	FALSE
cg18804963	chr11	132456073	132456074	OPCML	4978	946328	Non-CGI	FALSE	TRUE	FALSE
cg19298498	chr11	102027686	102027687	YAP1	10413	46493	Non-CGI	FALSE	TRUE	FALSE
cg19350020	chr11	118489198	118489199	PHLDB1	23187	11984	CGI-N-Shelf	FALSE	TRUE	FALSE
cg19531130	chr11	101786659	101786660	ANGPTL5	253935	592	CGI-S-Shore	FALSE	TRUE	FALSE
cg19761149	chr11	131685205	131685206	NTM	50863	444833	Non-CGI	FALSE	TRUE	FALSE
cg20113732	chr11	20691180	20691181	NELL1	4745	62	CGI	TRUE	FALSE	FALSE
cg20135002	chr11	47629003	47629004	C1QTNF4	114900	-13041	Non-CGI	FALSE	FALSE	TRUE
cg20445727	chr11	110728789	110728790	ARHGAP20	57569	-144876	Non-CGI	FALSE	FALSE	TRUE
cg21038682	chr11	62314820	62314821	AHNAK	79026	-487	CGI	TRUE	FALSE	FALSE
cg21071237	chr11	130379621	130379622	ADAMTS15	170689	60751	Non-CGI	FALSE	FALSE	TRUE
cg21697812	chr11	33721714	33721715	C11orf91	100131378	570	CGI-N-Shore	FALSE	TRUE	FALSE
cg21818891	chr11	35310917	35310918	SLC1A2	6506	130691	Non-CGI	FALSE	TRUE	FALSE
cg22110158	chr11	130036542	130036543	ST14	6768	6859	Non-CGI	FALSE	TRUE	FALSE
cg22329286	chr11	46761054	46761055	F2	2147	20310	Non-CGI	FALSE	TRUE	FALSE
cg22390023	chr11	95997732	95997733	MIR1260B	100422991	-76868	Non-CGI	FALSE	TRUE	FALSE
cg22789945	chr11	68382427	68382428	GAL	51083	-69554	Non-CGI	FALSE	TRUE	FALSE
cg23299484	chr11	65239080	65239081	MALAT1	378938	-26151	Non-CGI	FALSE	FALSE	TRUE
cg23591869	chr11	111170648	111170649	C11orf93	120376	671	CGI	TRUE	TRUE	FALSE
cg23684410	chr11	116897558	116897559	SIK3	23387	71433	Non-CGI	FALSE	TRUE	FALSE
cg23809118	chr11	112045941	112045942	BCO2	83875	-265	Non-CGI	TRUE	FALSE	FALSE
cg23991263	chr11	46958558	46958559	C11orf49	79096	306	CGI-S-Shore	FALSE	TRUE	FALSE
cg24061542	chr11	44971593	44971594	TP53I11	9537	1245	CGI	TRUE	TRUE	FALSE
cg24213115	chr11	121970740	121970741	MIR125B1	406911	-187	CGI-N-Shore	TRUE	TRUE	FALSE
cg24374161	chr11	46582058	46582059	AMBRA1	55626	33511	Non-CGI	FALSE	TRUE	FALSE
cg24458846	chr11	66512593	66512594	C11orf80	79703	385	CGI	FALSE	TRUE	FALSE
cg24644201	chr11	46299066	46299067	CREB3L1	90993	-160	CGI-N-Shore	TRUE	FALSE	FALSE
cg24831888	chr11	124612215	124612216	NRGN	4900	2385	CGI-S-Shore	FALSE	TRUE	FALSE
cg24974454	chr11	74442061	74442062	CHRDL2	25884	123	CGI	TRUE	FALSE	FALSE
cg25054929	chr11	14438148	14438149	RRAS2	22800	-52095	Non-CGI	FALSE	FALSE	TRUE
cg25103007	chr11	8285724	8285725	LMO1	4004	4456	CGI-S-Shore	TRUE	TRUE	FALSE
cg25229114	chr11	110167701	110167702	RDX	5962	-263	CGI	TRUE	FALSE	FALSE
cg25395188	chr11	60897782	60897783	CD5	921	27851	CGI-S-Shore	FALSE	TRUE	FALSE
cg25529587	chr11	131982540	131982541	NTM	50863	742168	Non-CGI	FALSE	TRUE	FALSE
cg25606978	chr11	14665054	14665055	PSMA1	5682	124	CGI	TRUE	FALSE	FALSE
cg25890640	chr11	68610632	68610633	CPT1A	1374	-1232	CGI	TRUE	FALSE	FALSE
cg26034313	chr11	117110208	117110209	RNF214	257160	6803	Non-CGI	FALSE	TRUE	FALSE
cg26209718	chr11	85646615	85646616	CCDC83	220047	80470	CGI-S-Shore	FALSE	FALSE	TRUE
cg26363555	chr11	121973044	121973045	MIR125B1	406911	-2491	CGI-S-Shore	TRUE	TRUE	FALSE
cg26754214	chr11	65339691	65339692	FAM89B	23625	-127	CGI-S-Shore	TRUE	FALSE	FALSE
cg26906285	chr11	132935463	132935464	OPCML	4978	466938	CGI	FALSE	TRUE	FALSE
cg26980692	chr11	60719947	60719948	SLC15A3	51296	-689	CGI-S-Shore	TRUE	FALSE	FALSE
cg27121309	chr11	76731589	76731590	B3GNT6	192134	-13844	Non-CGI	FALSE	TRUE	FALSE
cg27254468	chr11	71175039	71175040	NADSYN1	55191	10821	CGI	FALSE	TRUE	FALSE
cg27598621	chr11	125034439	125034440	PKNOX2	63876	-118	CGI	TRUE	FALSE	FALSE
ch.11.150171F	chr11	3739920	3739922	CHRNA10	57053	-47305	Non-CGI	FALSE	TRUE	FALSE
cg00046744	chr12	12418545	12418546	LRP6	4040	1264	CGI	FALSE	TRUE	FALSE
cg00060649	chr12	67928800	67928801	DYRK2	8445	-113710	Non-CGI	FALSE	TRUE	FALSE
cg00294025	chr12	7276360	7276361	RBP5	83758	5104	Non-CGI	FALSE	TRUE	FALSE
cg00578414	chr12	133307618	133307619	ANKLE2	23141	30831	CGI-S-Shore	FALSE	TRUE	FALSE
cg00731749	chr12	56102034	56102035	ITGA7	3679	4053	CGI-S-Shore	TRUE	TRUE	FALSE
cg00792107	chr12	133181600	133181601	LRCOL1	100507055	5435	CGI-S-Shore	FALSE	TRUE	FALSE
cg00874320	chr12	133219044	133219045	P2RX2	22953	23640	CGI-N-Shore	TRUE	TRUE	FALSE
cg01127428	chr12	102133040	102133041	SYCP3	50511	208	CGI	FALSE	TRUE	FALSE
cg01316819	chr12	54982281	54982282	PPP1R1A	5502	160	CGI	TRUE	FALSE	FALSE
cg01354782	chr12	26522758	26522759	SSPN	8082	174488	Non-CGI	FALSE	TRUE	FALSE
cg01856529	chr12	54653091	54653092	CBX5	23468	20822	Non-CGI	TRUE	TRUE	FALSE
cg01870625	chr12	6981935	6981936	SPSB2	84727	584	CGI	TRUE	TRUE	FALSE
cg01975858	chr12	15907517	15907518	EPS8	2059	34991	Non-CGI	FALSE	TRUE	FALSE
cg02224164	chr12	57883315	57883316	ARHGAP9	64333	-717	CGI-S-Shore	TRUE	TRUE	FALSE
cg02571819	chr12	124017613	124017614	RILPL1	353116	650	CGI-N-Shore	FALSE	TRUE	FALSE
cg03064145	chr12	132314751	132314752	MMP17	4326	1809	CGI	FALSE	TRUE	FALSE
cg03417559	chr12	113914536	113914537	LHX5	64211	-4658	CGI	FALSE	FALSE	TRUE
cg03681383	chr12	25801522	25801523	IFLTD1	160492	-33	Non-CGI	TRUE	FALSE	FALSE
cg04018214	chr12	91572199	91572200	DCN	1634	4605	Non-CGI	TRUE	TRUE	FALSE
cg04050315	chr12	127212034	127212035	LOC100507206	100507206	-9517	CGI	FALSE	FALSE	TRUE
cg04339424	chr12	101673795	101673796	UTP20	27340	-108	CGI-N-Shore	TRUE	FALSE	FALSE
cg04878072	chr12	58259474	58259475	CTDSP2	10106	-18726	CGI	FALSE	FALSE	TRUE
cg04888037	chr12	126677203	126677204	LOC400084	400084	-209282	CGI-S-Shore	FALSE	FALSE	TRUE
cg05562851	chr12	121151805	121151806	UNC119B	84747	3973	CGI-S-Shelf	FALSE	TRUE	FALSE
cg05795313	chr12	48745136	48745137	ZNF641	121274	-106	CGI	TRUE	FALSE	FALSE
cg05974580	chr12	69863874	69863875	FRS2	10818	-253	CGI	TRUE	FALSE	FALSE
cg06760566	chr12	91583419	91583420	DCN	1634	-6612	Non-CGI	FALSE	FALSE	TRUE
cg07735427	chr12	94940689	94940690	LOC144486	144486	86909	Non-CGI	FALSE	FALSE	TRUE
cg07914866	chr12	66583431	66583432	IRAK3	11213	452	CGI	FALSE	TRUE	FALSE
cg08872738	chr12	50339482	50339483	AQP2	359	-5040	CGI	FALSE	FALSE	TRUE
cg09087462	chr12	13043900	13043901	GPRC5A	9052	-54	CGI-N-Shore	TRUE	FALSE	FALSE
cg09163317	chr12	58027197	58027198	B4GALNT1	2583	-211	CGI-S-Shore	TRUE	FALSE	FALSE
cg09676376	chr12	54779077	54779078	ZNF385A	25946	6004	Non-CGI	TRUE	TRUE	FALSE
cg09875444	chr12	52317302	52317303	ACVRL1	94	16609	CGI-N-Shore	FALSE	FALSE	TRUE
cg09973502	chr12	46766012	46766013	SLC38A2	54407	631	CGI	FALSE	TRUE	FALSE
cg10231675	chr12	2944493	2944494	NRIP2	83714	-271	Non-CGI	TRUE	FALSE	FALSE
cg10255237	chr12	90150622	90150623	LOC338758	338758	47889	Non-CGI	FALSE	FALSE	TRUE
cg10438575	chr12	117318251	117318252	HRK	8739	979	CGI	FALSE	TRUE	FALSE
cg10449070	chr12	112204506	112204507	ALDH2	217	-183	CGI	TRUE	FALSE	FALSE
cg10624583	chr12	53440492	53440493	TENC1	23371	-316	CGI-N-Shore	TRUE	TRUE	FALSE
cg10689512	chr12	4381019	4381020	CCND2	894	-1881	CGI	TRUE	FALSE	FALSE
cg11409060	chr12	14518540	14518541	ATF7IP	55729	-69	CGI-N-Shore	TRUE	FALSE	FALSE
cg11505240	chr12	6832856	6832857	COPS7A	50813	-292	CGI-N-Shore	TRUE	FALSE	FALSE
cg11661914	chr12	49180849	49180850	ADCY6	112	1969	CGI-N-Shore	FALSE	TRUE	FALSE
cg12067997	chr12	3583597	3583598	PRMT8	56341	93081	Non-CGI	TRUE	TRUE	FALSE
cg12635120	chr12	121345228	121345229	SPPL3	121665	-3072	CGI-S-Shelf	FALSE	FALSE	TRUE
cg12882907	chr12	96428593	96428594	LTA4H	4048	8703	CGI-N-Shore	TRUE	TRUE	FALSE
cg13371705	chr12	2452955	2452956	CACNA1C	775	290538	Non-CGI	FALSE	TRUE	FALSE
cg15820536	chr12	132195144	132195145	SFSWAP	6433	-489	CGI	TRUE	FALSE	FALSE
cg16010163	chr12	92898400	92898401	CLLU1OS	574016	-76475	Non-CGI	FALSE	FALSE	TRUE
cg16236296	chr12	3477153	3477154	PRMT8	56341	-13360	CGI-S-Shore	FALSE	FALSE	TRUE
cg16377117	chr12	57526305	57526306	STAT6	6778	-3421	CGI-S-Shelf	FALSE	TRUE	FALSE
cg16463378	chr12	6619248	6619249	SCARNA10	692148	-138	Non-CGI	TRUE	TRUE	FALSE
cg16931076	chr12	1702001	1702002	FBXL14	144699	1328	CGI-N-Shore	FALSE	TRUE	FALSE
cg18321976	chr12	53893000	53893001	MAP3K12	7786	442	CGI-N-Shore	TRUE	TRUE	FALSE
cg19184897	chr12	58282506	58282507	CTDSP2	10106	-41758	Non-CGI	FALSE	FALSE	TRUE
cg19611616	chr12	27397833	27397834	STK38L	23012	754	CGI-S-Shore	FALSE	TRUE	FALSE
cg19778647	chr12	24974720	24974721	BCAT1	586	127671	Non-CGI	FALSE	TRUE	FALSE
cg20132003	chr12	122079418	122079419	ORAI1	84876	14962	CGI	FALSE	TRUE	FALSE
cg20389635	chr12	28120054	28120055	PTHLH	5744	4860	CGI-N-Shore	FALSE	TRUE	FALSE
cg20645010	chr12	125438540	125438541	DHX37	57647	35125	CGI	TRUE	TRUE	FALSE
cg20882260	chr12	2374427	2374428	CACNA1C	775	212010	Non-CGI	FALSE	TRUE	FALSE
cg21169969	chr12	109747333	109747334	FOXN4	121643	-307	CGI	TRUE	FALSE	FALSE
cg21176475	chr12	122667627	122667628	IL31	386653	-8880	CGI-N-Shore	TRUE	TRUE	FALSE
cg21231944	chr12	82153410	82153411	PPFIA2	8499	-300	CGI	TRUE	FALSE	FALSE
cg21431690	chr12	101603932	101603933	SLC5A8	160728	82	CGI	TRUE	FALSE	FALSE
cg21490635	chr12	13349273	13349274	EMP1	2012	-327	Non-CGI	TRUE	FALSE	FALSE
cg21839972	chr12	7904168	7904169	CLEC4C	170482	-2098	CGI	FALSE	FALSE	TRUE
cg21869315	chr12	125425310	125425311	UBC	7316	-25722	CGI	TRUE	FALSE	FALSE
cg22125370	chr12	93966485	93966486	SOCS2-AS1	144481	-940	CGI	TRUE	TRUE	FALSE
cg22502382	chr12	32701732	32701733	FGD4	121512	62825	Non-CGI	FALSE	TRUE	FALSE
cg22754765	chr12	103889166	103889167	C12orf42	374470	581	CGI-N-Shore	FALSE	TRUE	FALSE
cg23097277	chr12	27676539	27676540	PPFIBP1	8496	-504	CGI-N-Shore	TRUE	FALSE	FALSE
cg23164459	chr12	6714715	6714716	CHD4	1108	1834	CGI-N-Shore	FALSE	TRUE	FALSE
cg23315892	chr12	26351840	26351841	SSPN	8082	3570	CGI-S-Shelf	FALSE	TRUE	FALSE
cg23677778	chr12	46950853	46950854	SLC38A2	54407	-184207	Non-CGI	FALSE	FALSE	TRUE
cg23918953	chr12	68915528	68915529	RAP1B	5908	-89089	Non-CGI	FALSE	FALSE	TRUE
cg23979954	chr12	25801601	25801602	IFLTD1	160492	-112	Non-CGI	TRUE	FALSE	FALSE
cg24905909	chr12	58027199	58027200	B4GALNT1	2583	-213	CGI-S-Shore	TRUE	FALSE	FALSE
cg24952640	chr12	3108225	3108226	TEAD4	7004	39746	Non-CGI	FALSE	TRUE	FALSE
cg25108548	chr12	13196954	13196955	KIAA1467	57613	-359	CGI-N-Shore	TRUE	FALSE	FALSE
cg25163611	chr12	102875301	102875302	IGF1	3479	-922	Non-CGI	TRUE	FALSE	FALSE
cg25626318	chr12	6676809	6676810	NOP2	4839	669	CGI-N-Shore	FALSE	TRUE	FALSE
cg26378403	chr12	30908310	30908311	CAPRIN2	65981	-861	CGI	TRUE	FALSE	FALSE
cg26643128	chr12	3409466	3409467	PRMT8	56341	-81047	Non-CGI	TRUE	FALSE	FALSE
cg26853536	chr12	125399964	125399965	UBC	7316	-376	CGI-S-Shore	TRUE	FALSE	FALSE
cg26962924	chr12	42632618	42632619	YAF2	10138	-463	CGI-S-Shore	TRUE	FALSE	FALSE
cg27366072	chr12	12222913	12222914	BCL2L14	79370	-963	Non-CGI	TRUE	TRUE	FALSE
ch.12.71364637R	chr12	73078370	73078372	TRHDE-AS1	283392	-411080	Non-CGI	FALSE	FALSE	TRUE
cg00181327	chr13	31439278	31439279	MEDAG	84935	-41032	Non-CGI	FALSE	FALSE	TRUE
cg01131395	chr13	47207812	47207813	LRCH1	23143	80515	Non-CGI	FALSE	TRUE	FALSE
cg01498098	chr13	23942776	23942777	SACS	26278	65063	Non-CGI	TRUE	TRUE	FALSE
cg01907829	chr13	113485760	113485761	MCF2L	23263	-137017	CGI	FALSE	TRUE	FALSE
cg02427330	chr13	76450676	76450677	LMO7	4008	256105	Non-CGI	FALSE	TRUE	FALSE
cg02491276	chr13	103052560	103052561	FGF14	2259	1562	CGI	FALSE	TRUE	FALSE
cg02995295	chr13	51796962	51796963	FAM124A	220108	491	CGI	FALSE	TRUE	FALSE
cg03242905	chr13	114081076	114081077	ADPRHL1	113622	26761	CGI	FALSE	TRUE	FALSE
cg04001071	chr13	47613485	47613486	HTR2A	3356	-142315	Non-CGI	FALSE	FALSE	TRUE
cg04547260	chr13	32605259	32605260	FRY	10129	-176	CGI	TRUE	TRUE	FALSE
cg05105314	chr13	32709857	32709858	FRY	10129	104419	Non-CGI	FALSE	TRUE	FALSE
cg06515235	chr13	28501021	28501022	PDX1	3651	6852	CGI	FALSE	FALSE	TRUE
cg07610765	chr13	111264322	111264323	CARKD	55739	-3483	CGI-N-Shelf	FALSE	FALSE	TRUE
cg07833269	chr13	25090733	25090734	PARP4	143	-3784	CGI-S-Shelf	FALSE	FALSE	TRUE
cg09375377	chr13	113390011	113390012	ATP11A	23250	45367	CGI	FALSE	TRUE	FALSE
cg09940377	chr13	28534873	28534874	CDX2	1045	8442	CGI	FALSE	FALSE	TRUE
cg10736330	chr13	99960957	99960958	GPR183	1880	-1207	Non-CGI	TRUE	TRUE	FALSE
cg10864680	chr13	108922274	108922275	TNFSF13B	10673	296	Non-CGI	TRUE	FALSE	FALSE
cg11015012	chr13	98087382	98087383	RAP2A	5911	906	CGI-S-Shore	FALSE	TRUE	FALSE
cg11184569	chr13	38004268	38004269	LINC00547	400121	-104807	Non-CGI	FALSE	FALSE	TRUE
cg11605750	chr13	114251402	114251403	TFDP1	7027	12398	CGI-N-Shelf	FALSE	TRUE	FALSE
cg11654553	chr13	22248917	22248918	FGF9	2254	3701	CGI	FALSE	TRUE	FALSE
cg11770323	chr13	80066032	80066033	NDFIP2	54602	10772	Non-CGI	FALSE	TRUE	FALSE
cg13897833	chr13	74562744	74562745	KLF12	11278	145648	Non-CGI	FALSE	TRUE	FALSE
cg14716311	chr13	52601031	52601032	ALG11	440138	14507	Non-CGI	TRUE	TRUE	FALSE
cg14933676	chr13	114185807	114185808	TMCO3	55002	40498	CGI	FALSE	TRUE	FALSE
cg16139934	chr13	23949939	23949940	SACS	26278	57900	CGI	TRUE	TRUE	FALSE
cg17718899	chr13	22773018	22773019	FGF9	2254	527802	Non-CGI	FALSE	TRUE	FALSE
cg19043800	chr13	37702050	37702051	CSNK1A1L	122011	-22248	Non-CGI	FALSE	FALSE	TRUE
cg21613620	chr13	97927242	97927243	MBNL2	10150	52667	Non-CGI	TRUE	TRUE	FALSE
cg21615841	chr13	113606825	113606826	MCF2L	23263	-15952	Non-CGI	FALSE	TRUE	FALSE
cg21942770	chr13	28501860	28501861	PDX1	3651	7691	CGI	FALSE	FALSE	TRUE
cg22125926	chr13	24144682	24144683	TNFRSF19	55504	172	Non-CGI	TRUE	FALSE	FALSE
cg22202381	chr13	102103051	102103052	ITGBL1	9358	-1913	CGI-N-Shelf	TRUE	FALSE	FALSE
cg22825961	chr13	112859362	112859363	SOX1	6656	137448	CGI	FALSE	FALSE	TRUE
cg22996489	chr13	97646736	97646737	OXGR1	27199	-131	CGI	TRUE	FALSE	FALSE
cg24392970	chr13	86373600	86373601	SLITRK6	84189	-116	Non-CGI	TRUE	FALSE	FALSE
cg24769969	chr13	36051666	36051667	MIR548F5	100302239	463714	CGI-S-Shore	FALSE	TRUE	FALSE
cg25324021	chr13	27261076	27261077	GPR12	2835	73844	Non-CGI	FALSE	TRUE	FALSE
cg26391794	chr13	49323899	49323900	CYSLTR2	57105	42945	Non-CGI	FALSE	FALSE	TRUE
cg27113856	chr13	20254907	20254908	MPHOSPH8	54737	47118	Non-CGI	FALSE	FALSE	TRUE
cg27163659	chr13	108868194	108868195	LIG4	3981	2520	CGI-S-Shore	TRUE	TRUE	FALSE
cg27485906	chr13	42136511	42136512	RGCC	28984	104968	Non-CGI	FALSE	FALSE	TRUE
ch.13.1117341F	chr13	76263533	76263535	LMO7	4008	68962	Non-CGI	FALSE	TRUE	FALSE
ch.13.1810252F	chr13	111928457	111928459	TEX29	121793	-44555	Non-CGI	FALSE	TRUE	FALSE
cg01115857	chr14	73695018	73695019	PAPLN	89932	-9185	Non-CGI	FALSE	FALSE	TRUE
cg01647204	chr14	100883459	100883460	WDR25	79446	40703	Non-CGI	FALSE	TRUE	FALSE
cg01811583	chr14	100225060	100225061	EML1	2009	20990	Non-CGI	FALSE	TRUE	FALSE
cg04398950	chr14	103395423	103395424	AMN	81693	6429	CGI	FALSE	TRUE	FALSE
cg04789362	chr14	105333334	105333335	CEP170B	283638	1683	CGI-S-Shore	FALSE	TRUE	FALSE
cg04989913	chr14	61115132	61115133	SIX1	6495	1021	CGI	FALSE	TRUE	FALSE
cg05315276	chr14	52981335	52981336	TXNDC16	57544	37964	Non-CGI	FALSE	TRUE	FALSE
cg05324894	chr14	105850192	105850193	TEX22	647310	-14726	CGI	FALSE	TRUE	FALSE
cg05381290	chr14	86080914	86080915	FLRT2	23768	84425	Non-CGI	FALSE	TRUE	FALSE
cg05879919	chr14	102976503	102976504	ANKRD9	122416	-374	CGI	TRUE	FALSE	FALSE
cg06881965	chr14	69600007	69600008	DCAF5	8816	19905	Non-CGI	FALSE	TRUE	FALSE
cg07040024	chr14	92959939	92959940	RIN3	79890	-20184	Non-CGI	FALSE	TRUE	FALSE
cg07564690	chr14	32597733	32597734	ARHGAP5	394	51543	CGI	FALSE	TRUE	FALSE
cg08154783	chr14	62302988	62302989	SNAPC1	6617	73912	CGI-S-Shelf	FALSE	FALSE	TRUE
cg09600096	chr14	61114550	61114551	SIX1	6495	1603	CGI	FALSE	TRUE	FALSE
cg09834049	chr14	23525720	23525721	CDH24	64403	1025	CGI-N-Shore	FALSE	TRUE	FALSE
cg09844399	chr14	25526434	25526435	STXBP6	29091	-7262	Non-CGI	FALSE	FALSE	TRUE
cg10115368	chr14	100435663	100435664	EVL	51466	-2486	CGI-N-Shore	FALSE	FALSE	TRUE
cg10205038	chr14	93052501	93052502	RIN3	79890	72375	Non-CGI	FALSE	TRUE	FALSE
cg10415607	chr14	105238745	105238746	SIVA1	10572	19274	CGI	TRUE	TRUE	FALSE
cg10741418	chr14	73927547	73927548	NUMB	8650	-2260	CGI-S-Shore	TRUE	FALSE	FALSE
cg10975863	chr14	68830704	68830705	ZFP36L1	677	432254	CGI	FALSE	TRUE	FALSE
cg11120865	chr14	21853037	21853038	SUPT16H	11198	-611	CGI-S-Shore	TRUE	FALSE	FALSE
cg11146971	chr14	27068354	27068355	NOVA1	4857	-1393	CGI-S-Shore	TRUE	FALSE	FALSE
cg11754857	chr14	103447354	103447355	AMN	81693	58360	CGI	FALSE	TRUE	FALSE
cg13803234	chr14	68830813	68830814	ZFP36L1	677	432145	CGI	FALSE	TRUE	FALSE
cg14183602	chr14	23367828	23367829	REM2	161253	15395	Non-CGI	FALSE	FALSE	TRUE
cg14245199	chr14	100540291	100540292	DEGS2	123099	85719	Non-CGI	FALSE	TRUE	FALSE
cg14856893	chr14	21099898	21099899	OR6S1	341799	9950	CGI	TRUE	FALSE	FALSE
cg15524567	chr14	64970745	64970746	ZBTB1	22890	41	CGI	TRUE	TRUE	FALSE
cg19692929	chr14	92575120	92575121	ATXN3	4287	-2154	CGI-S-Shelf	FALSE	FALSE	TRUE
cg19715557	chr14	61114755	61114756	SIX1	6495	1398	CGI	FALSE	TRUE	FALSE
cg19725377	chr14	69535979	69535980	DCAF5	8816	83933	Non-CGI	FALSE	TRUE	FALSE
cg19874726	chr14	61114476	61114477	SIX1	6495	1677	CGI	FALSE	TRUE	FALSE
cg19994779	chr14	105482622	105482623	CDCA4	55038	4801	Non-CGI	FALSE	TRUE	FALSE
cg20070837	chr14	105457758	105457759	C14orf79	122616	5141	CGI	FALSE	TRUE	FALSE
cg21054473	chr14	100438957	100438958	EVL	51466	805	CGI	FALSE	TRUE	FALSE
cg21223625	chr14	59332349	59332350	DACT1	51339	231562	Non-CGI	FALSE	FALSE	TRUE
cg21496948	chr14	104153614	104153615	XRCC3	7517	28207	CGI	TRUE	TRUE	FALSE
cg21574293	chr14	74079184	74079185	ACOT6	641372	-4362	CGI	FALSE	FALSE	TRUE
cg21954263	chr14	69620432	69620433	DCAF5	8816	-517	CGI	TRUE	FALSE	FALSE
cg23032032	chr14	38064513	38064514	FOXA1	3169	-23	CGI-S-Shore	TRUE	FALSE	FALSE
cg23039471	chr14	64932782	64932783	AKAP5	9495	564	CGI	FALSE	TRUE	FALSE
cg23280155	chr14	72219812	72219813	RGS6	9628	-179003	CGI	FALSE	FALSE	TRUE
cg23962018	chr14	103989349	103989350	CKB	1152	-152	CGI	TRUE	FALSE	FALSE
cg24141378	chr14	100759815	100759816	SLC25A29	123096	13043	CGI-S-Shore	FALSE	TRUE	FALSE
cg24256211	chr14	55035215	55035216	SAMD4A	23034	884	CGI	FALSE	TRUE	FALSE
cg24996979	chr14	74223355	74223356	MIR4505	100616158	-2093	CGI-N-Shelf	FALSE	TRUE	FALSE
cg25597366	chr14	51313361	51313362	NIN	51199	-15521	Non-CGI	FALSE	FALSE	TRUE
cg25682097	chr14	105954118	105954119	CRIP1	1396	860	CGI	FALSE	TRUE	FALSE
cg26074025	chr14	89467057	89467058	TTC8	123016	176559	Non-CGI	FALSE	FALSE	TRUE
cg26846476	chr14	24838993	24838994	NFATC4	4776	2847	CGI	TRUE	TRUE	FALSE
cg26933359	chr14	20937370	20937371	PNP	4860	-166	CGI	TRUE	FALSE	FALSE
cg27659677	chr14	58864722	58864723	TOMM20L	387990	2077	CGI-S-Shore	FALSE	TRUE	FALSE
ch.14.1378567F	chr14	89052127	89052129	ZC3H14	79882	22873	Non-CGI	FALSE	TRUE	FALSE
cg00024722	chr15	32163260	32163261	OTUD7A	161725	-267	CGI	TRUE	FALSE	FALSE
cg00122362	chr15	98965289	98965290	FAM169B	283777	92320	CGI	FALSE	FALSE	TRUE
cg00126739	chr15	69706375	69706376	KIF23	9493	-250	CGI-N-Shore	TRUE	FALSE	FALSE
cg00365880	chr15	64647465	64647466	CSNK1G1	53944	18501	CGI-N-Shore	FALSE	TRUE	FALSE
cg00413066	chr15	52405464	52405465	BCL2L10	10017	-491	CGI-S-Shore	TRUE	FALSE	FALSE
cg00918794	chr15	64454941	64454942	PPIB	5479	411	CGI-N-Shore	FALSE	TRUE	FALSE
cg01446731	chr15	80770633	80770634	ARNT2	9915	73940	Non-CGI	FALSE	TRUE	FALSE
cg01704999	chr15	65931192	65931193	SLC24A1	9187	27487	Non-CGI	FALSE	TRUE	FALSE
[truncated: 439 more rows]
