# Supplementary material for: H3K4me1 marks DNA regions hypomethylated during aging in human stem and differentiated cells
Source: HighWire-hosted journal article supplement (doi:10.1101/gr.169011.113), 2014-09-30
Supplement: Supplemental_Table_9.xlsx [file Supplemental_Table_9.xlsx]

## Sheet: ST9
Supplemental Table 9: List of divergent CpG sites identified in MSCs during aging
Target ID	Chromosome	start	end	nearest.gene	nearest.gene.id	disttotss	hmm.cpgi	prom.reg	intra.reg	inter.reg
cg00081799	chr1	6390793	6390794	ACOT7	11332	63031	Non-CGI	FALSE	TRUE	FALSE
cg00116430	chr1	94188268	94188269	MIR760	100126348	-124118	Non-CGI	FALSE	TRUE	FALSE
cg00149537	chr1	9409810	9409811	SPSB1	80176	56868	CGI-S-Shore	FALSE	TRUE	FALSE
cg00157179	chr1	2383687	2383688	PLCH2	9651	-24065	CGI-S-Shelf	FALSE	FALSE	TRUE
cg00160667	chr1	29587357	29587358	PTPRU	10076	24328	CGI	FALSE	TRUE	FALSE
cg00170536	chr1	244624558	244624559	C1orf101	257044	6878	CGI	TRUE	TRUE	FALSE
cg00249522	chr1	169878814	169878815	SCYL3	57147	-15737	Non-CGI	FALSE	FALSE	TRUE
cg00346208	chr1	20669905	20669906	VWA5B1	127731	52492	CGI	FALSE	TRUE	FALSE
cg00423597	chr1	33235531	33235532	KIAA1522	57648	28018	CGI-N-Shore	FALSE	TRUE	FALSE
cg00503383	chr1	91301651	91301652	BARHL2	343472	-118856	CGI	TRUE	TRUE	FALSE
cg00563824	chr1	209405064	209405065	MIR205HG	642587	-197102	CGI	FALSE	FALSE	TRUE
cg00564737	chr1	196847182	196847183	CFHR2	3080	-65750	CGI-N-Shore	FALSE	TRUE	FALSE
cg00569276	chr1	17446545	17446546	PADI2	11240	-596	CGI-S-Shore	TRUE	FALSE	FALSE
cg00701051	chr1	145385391	145385392	HFE2	148738	-27798	CGI	TRUE	FALSE	FALSE
cg00806311	chr1	244625112	244625113	C1orf101	257044	7432	CGI-S-Shore	FALSE	TRUE	FALSE
cg00823843	chr1	244094885	244094886	LOC339529	339529	14180	CGI	FALSE	TRUE	FALSE
cg00866690	chr1	2066631	2066632	C1orf86	199990	72539	CGI	FALSE	TRUE	FALSE
cg00951395	chr1	232941775	232941776	MAP10	54627	1136	CGI-S-Shore	TRUE	FALSE	FALSE
cg00973823	chr1	32226349	32226350	MIR4254	100423028	-2012	CGI	FALSE	TRUE	FALSE
cg01101459	chr1	234871477	234871478	LOC100506810	100506810	11687	Non-CGI	FALSE	FALSE	TRUE
cg01393939	chr1	87803705	87803706	LMO4	8543	9553	CGI-S-Shelf	FALSE	TRUE	FALSE
cg01553584	chr1	224400672	224400673	DEGS1	8560	29761	Non-CGI	FALSE	FALSE	TRUE
cg01795776	chr1	23003462	23003463	C1QB	713	23779	CGI-N-Shore	FALSE	FALSE	TRUE
cg01802898	chr1	16069621	16069622	TMEM82	388595	703	CGI	FALSE	TRUE	FALSE
cg01912586	chr1	119543661	119543662	TBX15	6913	-11481	CGI	FALSE	FALSE	TRUE
cg01959730	chr1	119548825	119548826	TBX15	6913	-16645	CGI-N-Shore	FALSE	FALSE	TRUE
cg01961086	chr1	3086487	3086488	MIR4251	100422968	41947	CGI	FALSE	TRUE	FALSE
cg02066716	chr1	2112006	2112007	C1orf86	199990	27164	CGI	TRUE	TRUE	FALSE
cg02083836	chr1	87617350	87617351	LOC339524	339524	158659	CGI	FALSE	TRUE	FALSE
cg02623028	chr1	23003569	23003570	C1QB	713	23886	CGI	FALSE	FALSE	TRUE
cg02637320	chr1	205561338	205561339	MFSD4	148808	23225	CGI	FALSE	TRUE	FALSE
cg03119829	chr1	64170964	64170965	ROR1	4919	-68724	Non-CGI	FALSE	FALSE	TRUE
cg03440588	chr1	47900320	47900321	FOXD2-AS1	84793	-6	CGI	TRUE	FALSE	FALSE
cg03449175	chr1	228645121	228645122	HIST3H2A	92815	437	CGI	TRUE	FALSE	FALSE
cg03449456	chr1	3191219	3191220	MIR4251	100422968	146679	CGI-N-Shore	FALSE	TRUE	FALSE
cg03514351	chr1	65991765	65991766	LEPR	3953	105633	CGI	FALSE	TRUE	FALSE
cg03601920	chr1	17445310	17445311	PADI2	11240	636	CGI-N-Shore	FALSE	TRUE	FALSE
cg03769939	chr1	25254129	25254130	RUNX3	864	37481	CGI-N-Shore	FALSE	TRUE	FALSE
cg04134748	chr1	3052175	3052176	MIR4251	100422968	7635	CGI	FALSE	TRUE	FALSE
cg04221877	chr1	25257515	25257516	RUNX3	864	34095	CGI	TRUE	TRUE	FALSE
cg04246763	chr1	87617811	87617812	LOC339524	339524	159120	CGI	FALSE	TRUE	FALSE
cg04248332	chr1	31423071	31423072	SNORD103A	692234	-1018	Non-CGI	TRUE	TRUE	FALSE
cg04250451	chr1	25257784	25257785	RUNX3	864	33826	CGI	TRUE	TRUE	FALSE
cg04293733	chr1	98511629	98511630	MIR137	406928	96	CGI	TRUE	TRUE	FALSE
cg04297819	chr1	22260125	22260126	HSPG2	3339	3623	CGI-N-Shelf	FALSE	TRUE	FALSE
cg04307831	chr1	246729669	246729670	CNST	163882	29	CGI	TRUE	FALSE	FALSE
cg04501188	chr1	47904171	47904172	FOXD2	2306	2481	CGI	TRUE	FALSE	FALSE
cg04560225	chr1	91195336	91195337	BARHL2	343472	-12541	CGI	FALSE	FALSE	TRUE
cg04567140	chr1	31000432	31000433	MATN1-AS1	100129196	-191185	Non-CGI	FALSE	FALSE	TRUE
cg04876124	chr1	3160911	3160912	MIR4251	100422968	116371	CGI	FALSE	TRUE	FALSE
cg04998420	chr1	153508511	153508512	S100A6	6277	204	CGI	TRUE	FALSE	FALSE
cg05117633	chr1	33502512	33502513	AK2	204	0	CGI	TRUE	FALSE	FALSE
cg05334053	chr1	3474202	3474203	MIR551A	693135	3150	CGI	FALSE	TRUE	FALSE
cg05656688	chr1	25254088	25254089	RUNX3	864	37522	CGI-N-Shore	FALSE	TRUE	FALSE
cg05723989	chr1	210407677	210407678	SERTAD4-AS1	574036	-210	CGI-S-Shore	TRUE	TRUE	FALSE
cg05794117	chr1	228394559	228394560	OBSCN	84033	-1300	Non-CGI	TRUE	TRUE	FALSE
cg06211724	chr1	183155437	183155438	LAMC2	3918	262	CGI	TRUE	FALSE	FALSE
cg06616057	chr1	209848306	209848307	G0S2	50486	-362	CGI-N-Shore	TRUE	FALSE	FALSE
cg06626599	chr1	41284135	41284136	KCNQ4	9132	34450	CGI	FALSE	TRUE	FALSE
cg06804846	chr1	6535492	6535493	TNFRSF25	8718	-9236	CGI-S-Shore	FALSE	TRUE	FALSE
cg06834177	chr1	6333843	6333844	GPR153	387509	-12807	CGI-N-Shelf	FALSE	TRUE	FALSE
cg07139495	chr1	246860416	246860417	SCCPDH	51097	-26960	CGI-S-Shore	FALSE	FALSE	TRUE
cg07143158	chr1	12609308	12609309	SNORA59B	677882	42007	CGI	FALSE	FALSE	TRUE
cg07236781	chr1	25291041	25291042	RUNX3	864	569	CGI	TRUE	TRUE	FALSE
cg07366503	chr1	228330085	228330086	GUK1	2987	2299	CGI-S-Shore	FALSE	TRUE	FALSE
cg07597386	chr1	3028338	3028339	MIR4251	100422968	-16199	CGI	FALSE	TRUE	FALSE
cg07790079	chr1	116021925	116021926	NGF	4803	-141067	CGI	FALSE	FALSE	TRUE
cg07917878	chr1	113041557	113041558	WNT2B	7482	31516	CGI-N-Shelf	FALSE	TRUE	FALSE
cg07996594	chr1	25257505	25257506	RUNX3	864	34105	CGI	TRUE	TRUE	FALSE
cg08007925	chr1	3332160	3332161	ARHGEF16	27237	-38985	CGI	FALSE	TRUE	FALSE
cg08130630	chr1	2312475	2312476	MORN1	79906	10516	CGI	FALSE	TRUE	FALSE
cg08231697	chr1	157165335	157165336	ETV3	2117	-56951	CGI	FALSE	FALSE	TRUE
cg08638320	chr1	47900265	47900266	FOXD2-AS1	84793	46	CGI	TRUE	FALSE	FALSE
cg08643618	chr1	1189466	1189467	FAM132A	388581	-7363	CGI	FALSE	TRUE	FALSE
cg08648047	chr1	11028561	11028562	C1orf127	148345	13531	Non-CGI	FALSE	TRUE	FALSE
cg08663263	chr1	1249367	1249368	ACAP3	116983	-4377	CGI	TRUE	TRUE	FALSE
cg08703872	chr1	151812421	151812422	C2CD4D	100191040	610	CGI	TRUE	TRUE	FALSE
cg08716217	chr1	2483719	2483720	LOC115110	115110	563	CGI	TRUE	FALSE	FALSE
cg08732750	chr1	87598351	87598352	LOC339524	339524	139660	CGI	TRUE	TRUE	FALSE
cg08845123	chr1	62784332	62784333	KANK4	163782	749	CGI	FALSE	TRUE	FALSE
cg08848903	chr1	92352293	92352294	TGFBR3	7049	19264	CGI	TRUE	TRUE	FALSE
cg08900371	chr1	210407556	210407557	SERTAD4-AS1	574036	-89	CGI	TRUE	TRUE	FALSE
cg08920249	chr1	209405771	209405772	MIR205HG	642587	-196395	CGI	FALSE	FALSE	TRUE
cg09025215	chr1	223316219	223316220	TLR5	7100	403	CGI-N-Shore	FALSE	TRUE	FALSE
cg09234454	chr1	94560697	94560698	ABCA4	24	26006	CGI	FALSE	TRUE	FALSE
cg09806671	chr1	165324679	165324680	LMX1A	4009	1271	CGI	FALSE	TRUE	FALSE
cg09990962	chr1	3164431	3164432	MIR4251	100422968	119891	CGI	FALSE	TRUE	FALSE
cg09993145	chr1	25291905	25291906	RUNX3	864	-292	CGI-S-Shore	TRUE	FALSE	FALSE
cg10013501	chr1	25257813	25257814	RUNX3	864	33797	CGI	TRUE	TRUE	FALSE
cg10103857	chr1	183210104	183210105	LAMC2	3918	54929	Non-CGI	FALSE	TRUE	FALSE
cg10210806	chr1	6514605	6514606	TNFRSF25	8718	11648	CGI	FALSE	TRUE	FALSE
cg10239860	chr1	71172023	71172024	CTH	1491	295121	CGI-N-Shore	TRUE	FALSE	FALSE
cg10577713	chr1	204401413	204401414	PPP1R15B	84919	-20468	Non-CGI	FALSE	TRUE	FALSE
cg10588310	chr1	3332000	3332001	ARHGEF16	27237	-39145	CGI-S-Shore	FALSE	TRUE	FALSE
cg10777461	chr1	10590481	10590482	PEX14	5195	55477	CGI-N-Shore	FALSE	TRUE	FALSE
cg10796749	chr1	10056837	10056838	RBP7	116362	-416	CGI-N-Shore	TRUE	FALSE	FALSE
cg10821610	chr1	19052235	19052236	PAX7	5081	94734	CGI-S-Shelf	FALSE	TRUE	FALSE
cg11250802	chr1	3207502	3207503	MIR4251	100422968	162962	CGI	FALSE	TRUE	FALSE
cg11397493	chr1	3307215	3307216	ARHGEF16	27237	-63930	CGI	FALSE	TRUE	FALSE
cg11400774	chr1	156051324	156051325	MEX3A	92312	463	CGI	TRUE	TRUE	FALSE
cg11521434	chr1	38227381	38227382	EPHA10	284656	3441	CGI	FALSE	TRUE	FALSE
cg11580676	chr1	156211415	156211416	BGLAP	632	-534	CGI-N-Shelf	TRUE	TRUE	FALSE
cg11649821	chr1	1859438	1859439	TMEM52	339456	-8697	CGI	TRUE	FALSE	FALSE
cg11668749	chr1	229568360	229568361	ACTA1	58	1481	CGI	FALSE	TRUE	FALSE
cg11704876	chr1	40025232	40025233	PPIEL	728448	136	CGI	FALSE	TRUE	FALSE
cg11787288	chr1	111506544	111506545	LRIF1	55791	20	CGI	TRUE	FALSE	FALSE
cg11806528	chr1	113051977	113051978	WNT2B	7482	41936	CGI	TRUE	TRUE	FALSE
cg11807529	chr1	17958884	17958885	ARHGEF10L	55160	92553	Non-CGI	FALSE	TRUE	FALSE
cg11823253	chr1	213154553	213154554	VASH2	79805	30665	Non-CGI	FALSE	TRUE	FALSE
cg11962640	chr1	19764686	19764687	CAPZB	832	47378	CGI	FALSE	TRUE	FALSE
cg12036877	chr1	156211896	156211897	BGLAP	632	-53	CGI-N-Shelf	TRUE	TRUE	FALSE
cg12396969	chr1	27319532	27319533	TRNP1	388610	-661	CGI-N-Shore	TRUE	TRUE	FALSE
cg12410370	chr1	43296526	43296527	CCDC23	374969	-13466	CGI	TRUE	TRUE	FALSE
cg12459932	chr1	25292018	25292019	RUNX3	864	-405	CGI-S-Shore	TRUE	FALSE	FALSE
cg12696328	chr1	227729680	227729681	ZNF678	339500	-21538	CGI	FALSE	FALSE	TRUE
cg12700145	chr1	31158200	31158201	MATN1-AS1	100129196	-33417	CGI	FALSE	FALSE	TRUE
cg12750745	chr1	44509022	44509023	KLF17	128209	-5006	Non-CGI	FALSE	FALSE	TRUE
cg12764034	chr1	75602846	75602847	LHX8	431707	8726	CGI	TRUE	TRUE	FALSE
cg12804283	chr1	240569726	240569727	GREM2	64388	205734	CGI	FALSE	TRUE	FALSE
cg13060114	chr1	36038950	36038951	TFAP2E	339488	-19	CGI	TRUE	TRUE	FALSE
cg13064658	chr1	212003989	212003990	LPGAT1	9926	123	CGI	TRUE	FALSE	FALSE
cg13071729	chr1	201617443	201617444	NAV1	89796	-5	CGI	TRUE	FALSE	FALSE
cg13132577	chr1	60392140	60392141	CYP2J2	1573	281	CGI-N-Shore	FALSE	TRUE	FALSE
cg13182731	chr1	32208634	32208635	MIR4254	100423028	15700	CGI	FALSE	TRUE	FALSE
cg13229078	chr1	234998769	234998770	LOC100506810	100506810	138979	Non-CGI	FALSE	FALSE	TRUE
cg13448978	chr1	27961796	27961797	FGR	2268	-68	CGI	TRUE	FALSE	FALSE
cg13471521	chr1	12244930	12244931	MIR4632	100616438	-6830	Non-CGI	FALSE	TRUE	FALSE
cg13474414	chr1	205500676	205500677	LOC284578	284578	25085	CGI-S-Shelf	FALSE	TRUE	FALSE
cg13933734	chr1	119550484	119550485	TBX15	6913	-18304	CGI	FALSE	FALSE	TRUE
cg14030258	chr1	29591301	29591302	PTPRU	10076	28272	CGI-S-Shelf	FALSE	TRUE	FALSE
cg14094639	chr1	1309477	1309478	AURKAIP1	54998	1339	CGI	FALSE	TRUE	FALSE
cg14181576	chr1	27961563	27961564	FGR	2268	162	CGI	FALSE	TRUE	FALSE
cg14258756	chr1	6158059	6158060	CHD5	26038	82133	CGI	FALSE	TRUE	FALSE
cg14415956	chr1	221737032	221737033	DUSP10	11221	178482	CGI	FALSE	FALSE	TRUE
cg14669362	chr1	36923510	36923511	MRPS15	64960	6528	Non-CGI	FALSE	TRUE	FALSE
cg14834391	chr1	2537342	2537343	FAM213B	127281	19442	CGI	FALSE	TRUE	FALSE
cg15014975	chr1	25257547	25257548	RUNX3	864	34063	CGI	TRUE	TRUE	FALSE
cg15090005	chr1	10058068	10058069	RBP7	116362	812	CGI	FALSE	TRUE	FALSE
cg15208524	chr1	10270712	10270713	KIF1B	23095	-50	CGI	TRUE	FALSE	FALSE
cg15467646	chr1	22141014	22141015	LDLRAD2	401944	2255	CGI	FALSE	TRUE	FALSE
cg15712177	chr1	25236296	25236297	RUNX3	864	55314	CGI-S-Shore	FALSE	TRUE	FALSE
cg15824045	chr1	205561193	205561194	MFSD4	148808	23080	CGI	FALSE	TRUE	FALSE
cg15831613	chr1	212780972	212780973	FAM71A	149647	-16815	CGI	TRUE	TRUE	FALSE
cg15831875	chr1	245986694	245986695	KIF26B	55083	668406	Non-CGI	FALSE	TRUE	FALSE
cg15929771	chr1	12466185	12466186	SNORA59B	677882	-101113	Non-CGI	FALSE	TRUE	FALSE
cg15963463	chr1	25253237	25253238	RUNX3	864	38373	CGI-N-Shore	FALSE	TRUE	FALSE
cg16020346	chr1	11761078	11761079	DRAXIN	374946	9296	CGI	FALSE	TRUE	FALSE
cg16038327	chr1	154322245	154322246	ATP8B2	57198	24208	CGI-N-Shelf	FALSE	TRUE	FALSE
cg16060635	chr1	12588654	12588655	SNORA59B	677882	21353	CGI-S-Shore	FALSE	FALSE	TRUE
cg16107724	chr1	31158299	31158300	MATN1-AS1	100129196	-33318	CGI	FALSE	FALSE	TRUE
cg16387254	chr1	231472287	231472288	EXOC8	149371	1289	CGI	TRUE	FALSE	FALSE
cg16409409	chr1	200861597	200861598	C1orf106	55765	969	CGI-S-Shore	FALSE	TRUE	FALSE
cg16430505	chr1	23551855	23551856	HTR1D	3352	-30632	Non-CGI	FALSE	FALSE	TRUE
cg16692196	chr1	85040371	85040372	CTBS	1486	-207	CGI-S-Shore	TRUE	FALSE	FALSE
cg17031656	chr1	109801247	109801248	CELSR2	1952	8605	CGI	FALSE	TRUE	FALSE
cg17284384	chr1	205649861	205649862	ELK4	2005	-230	CGI	TRUE	FALSE	FALSE
cg17296990	chr1	224528783	224528784	NVL	4931	-10891	CGI	FALSE	FALSE	TRUE
cg17491622	chr1	1369616	1369617	VWA1	64856	-1285	CGI	TRUE	FALSE	FALSE
cg17590234	chr1	66456912	66456913	PDE4B	5142	198718	Non-CGI	TRUE	TRUE	FALSE
cg17799946	chr1	91301962	91301963	BARHL2	343472	-119167	CGI-S-Shore	TRUE	TRUE	FALSE
cg17802005	chr1	235035687	235035688	LOC100506810	100506810	175897	CGI	FALSE	FALSE	TRUE
cg17886330	chr1	19204233	19204234	MIR4695	100616120	5539	CGI-S-Shore	FALSE	TRUE	FALSE
cg17940849	chr1	3193280	3193281	MIR4251	100422968	148740	CGI	FALSE	TRUE	FALSE
cg18196782	chr1	232941176	232941177	MAP10	54627	537	CGI	TRUE	FALSE	FALSE
cg18235734	chr1	91301731	91301732	BARHL2	343472	-118936	CGI	TRUE	TRUE	FALSE
cg18267790	chr1	27332632	27332633	FAM46B	115572	6699	CGI-N-Shore	FALSE	TRUE	FALSE
cg18436810	chr1	196619732	196619733	CFH	3075	-1274	Non-CGI	TRUE	FALSE	FALSE
cg18592195	chr1	227963171	227963172	JMJD4	65094	-40058	CGI	FALSE	TRUE	FALSE
cg18770350	chr1	236849966	236849967	ACTN2	88	195	CGI	TRUE	FALSE	FALSE
cg18877525	chr1	244303292	244303293	ZBTB18	10472	88730	CGI	FALSE	FALSE	TRUE
cg18934822	chr1	2191402	2191403	SKI	6497	31267	CGI	FALSE	TRUE	FALSE
cg19087171	chr1	234819745	234819746	LOC100506810	100506810	-40042	Non-CGI	FALSE	FALSE	TRUE
cg19508561	chr1	32740758	32740759	HDAC1	3065	-16948	CGI	FALSE	TRUE	FALSE
cg19637330	chr1	19110922	19110923	TAS1R2	80834	75231	CGI	FALSE	FALSE	TRUE
cg19639479	chr1	1374669	1374670	VWA1	64856	3765	CGI	FALSE	TRUE	FALSE
cg19697558	chr1	24646085	24646086	GRHL3	57822	272	CGI-N-Shelf	TRUE	TRUE	FALSE
cg19730691	chr1	119526437	119526438	TBX15	6913	5740	CGI	FALSE	TRUE	FALSE
cg19911801	chr1	2435632	2435633	PANK4	55229	22401	CGI	TRUE	TRUE	FALSE
cg20156999	chr1	249154285	249154286	ZNF692	55657	-969	CGI-S-Shore	TRUE	FALSE	FALSE
cg20263392	chr1	3462550	3462551	MIR551A	693135	14802	CGI-S-Shore	FALSE	TRUE	FALSE
cg20270863	chr1	210407484	210407485	SERTAD4-AS1	574036	-17	CGI	TRUE	TRUE	FALSE
cg20820767	chr1	45082840	45082841	TMEM53	79639	57257	CGI	FALSE	TRUE	FALSE
cg20823455	chr1	120166605	120166606	ZNF697	90874	23783	CGI	FALSE	TRUE	FALSE
cg21109485	chr1	11761296	11761297	DRAXIN	374946	9514	CGI	FALSE	TRUE	FALSE
cg21262776	chr1	3144113	3144114	MIR4251	100422968	99573	CGI	FALSE	TRUE	FALSE
cg21273275	chr1	24648328	24648329	GRHL3	57822	2515	CGI	TRUE	TRUE	FALSE
cg21299491	chr1	3057366	3057367	MIR4251	100422968	12826	CGI	FALSE	TRUE	FALSE
cg21391942	chr1	2259316	2259317	LOC100129534	100129534	24782	CGI	FALSE	TRUE	FALSE
cg21421701	chr1	212872679	212872680	BATF3	55509	646	CGI	FALSE	TRUE	FALSE
cg21854408	chr1	240161445	240161446	RPS7P5	645884	-9377	CGI	FALSE	FALSE	TRUE
cg21878149	chr1	221052023	221052024	HLX	3142	-718	CGI	TRUE	FALSE	FALSE
cg22167515	chr1	91192466	91192467	BARHL2	343472	-9671	CGI	FALSE	FALSE	TRUE
cg22234827	chr1	154947116	154947117	CKS1B	1163	0	CGI	TRUE	FALSE	FALSE
cg22343327	chr1	84819379	84819380	UOX	391051	44195	Non-CGI	FALSE	FALSE	TRUE
cg22371492	chr1	170637796	170637797	PRRX1	5396	4482	CGI	FALSE	TRUE	FALSE
cg22391718	chr1	110326285	110326286	EPS8L3	79574	-19640	Non-CGI	FALSE	FALSE	TRUE
cg22396632	chr1	3079212	3079213	MIR4251	100422968	34672	CGI	FALSE	TRUE	FALSE
cg22501998	chr1	38155367	38155368	C1orf109	54955	2519	CGI-N-Shore	FALSE	TRUE	FALSE
cg22506548	chr1	2996949	2996950	PRDM16	63976	11206	CGI	FALSE	TRUE	FALSE
cg22560020	chr1	246952914	246952915	LOC149134	149134	13598	CGI-S-Shore	TRUE	TRUE	FALSE
cg22712329	chr1	244624555	244624556	C1orf101	257044	6875	CGI	TRUE	TRUE	FALSE
cg22790758	chr1	15013167	15013168	KAZN	23254	87953	Non-CGI	FALSE	TRUE	FALSE
cg22863889	chr1	155910967	155910968	RXFP4	339403	-511	Non-CGI	TRUE	FALSE	FALSE
cg23015118	chr1	2232527	2232528	LOC100129534	100129534	51571	CGI	FALSE	TRUE	FALSE
cg23085167	chr1	3160739	3160740	MIR4251	100422968	116199	CGI	FALSE	TRUE	FALSE
cg23173688	chr1	86081894	86081895	CYR61	3491	35449	CGI	FALSE	FALSE	TRUE
cg23216745	chr1	154929762	154929763	PBXIP1	57326	-1194	Non-CGI	TRUE	TRUE	FALSE
cg23230478	chr1	6360620	6360621	GPR153	387509	-39584	CGI-N-Shore	FALSE	TRUE	FALSE
cg23371746	chr1	119532925	119532926	TBX15	6913	-745	CGI	TRUE	FALSE	FALSE
cg23602478	chr1	26503979	26503980	CNKSR1	10256	0	Non-CGI	TRUE	FALSE	FALSE
cg23622235	chr1	1064942	1064943	LOC254099	254099	-7453	CGI-S-Shore	FALSE	FALSE	TRUE
cg23647410	chr1	221051066	221051067	HLX	3142	-1675	CGI	TRUE	FALSE	FALSE
cg23677911	chr1	230256394	230256395	GALNT2	2590	62857	Non-CGI	FALSE	TRUE	FALSE
cg23971170	chr1	165326269	165326270	LMX1A	4009	-316	CGI	TRUE	FALSE	FALSE
cg24006721	chr1	25258225	25258226	RUNX3	864	33385	CGI	TRUE	TRUE	FALSE
cg24425838	chr1	151812435	151812436	C2CD4D	100191040	596	CGI	TRUE	TRUE	FALSE
cg24463471	chr1	25257978	25257979	RUNX3	864	33632	CGI	TRUE	TRUE	FALSE
cg24529814	chr1	3028457	3028458	MIR4251	100422968	-16080	CGI	FALSE	TRUE	FALSE
cg24599205	chr1	110754087	110754088	KCNC4	3749	750	CGI	TRUE	FALSE	FALSE
cg24639535	chr1	246023674	246023675	SMYD3	64754	646968	Non-CGI	FALSE	TRUE	FALSE
cg24641302	chr1	165087025	165087026	LMX1A	4009	238925	CGI-S-Shore	FALSE	FALSE	TRUE
cg24658517	chr1	221065322	221065323	HLX	3142	12578	CGI	FALSE	FALSE	TRUE
cg24679453	chr1	3079069	3079070	MIR4251	100422968	34529	CGI	FALSE	TRUE	FALSE
cg24683414	chr1	92952581	92952582	GFI1	2672	-147	CGI	TRUE	FALSE	FALSE
cg24843609	chr1	156211434	156211435	BGLAP	632	-515	CGI-N-Shelf	TRUE	TRUE	FALSE
cg24859236	chr1	9750213	9750214	C1orf200	644997	-35568	CGI	TRUE	TRUE	FALSE
cg24873592	chr1	32042092	32042093	TINAGL1	64129	5	Non-CGI	TRUE	FALSE	FALSE
cg25192855	chr1	209979283	209979284	IRF6	3664	235	CGI	FALSE	TRUE	FALSE
cg25409554	chr1	234871422	234871423	LOC100506810	100506810	11632	Non-CGI	FALSE	FALSE	TRUE
cg25882256	chr1	25257759	25257760	RUNX3	864	33851	CGI	TRUE	TRUE	FALSE
cg26048630	chr1	170640675	170640676	PRRX1	5396	7361	CGI-S-Shore	FALSE	TRUE	FALSE
cg26226110	chr1	1395945	1395946	ATAD3C	219293	10875	CGI-N-Shore	FALSE	TRUE	FALSE
cg26256263	chr1	25258146	25258147	RUNX3	864	33464	CGI	TRUE	TRUE	FALSE
cg26360612	chr1	23543300	23543301	HTR1D	3352	-22077	CGI-N-Shore	FALSE	FALSE	TRUE
cg26422458	chr1	79472452	79472453	ELTD1	64123	41	CGI	TRUE	FALSE	FALSE
cg26520930	chr1	41250117	41250118	KCNQ4	9132	432	CGI	FALSE	TRUE	FALSE
cg26524353	chr1	33352589	33352590	HPCA	3208	490	CGI-S-Shore	FALSE	TRUE	FALSE
cg26885220	chr1	65775570	65775571	DNAJC6	9829	55421	CGI	TRUE	TRUE	FALSE
cg26896569	chr1	45768490	45768491	LOC400752	400752	-1090	CGI-N-Shore	TRUE	FALSE	FALSE
cg27179680	chr1	205460879	205460880	CDK18	5129	-12803	Non-CGI	FALSE	FALSE	TRUE
cg27181349	chr1	36574854	36574855	COL8A2	1296	-9003	Non-CGI	FALSE	FALSE	TRUE
cg27314669	chr1	156822430	156822431	INSRR	3645	6280	CGI-S-Shelf	FALSE	TRUE	FALSE
cg27444751	chr1	3029051	3029052	MIR4251	100422968	-15486	CGI	FALSE	TRUE	FALSE
cg27631057	chr1	236651140	236651141	LGALS8	3964	-30372	Non-CGI	FALSE	FALSE	TRUE
cg00420922	chr2	101767891	101767892	TBC1D8	11138	-44	CGI	TRUE	FALSE	FALSE
cg01020413	chr2	66810487	66810488	MEIS1	4211	147954	CGI-S-Shore	FALSE	FALSE	TRUE
cg01089914	chr2	218843229	218843230	TNS1	7145	24487	CGI-N-Shore	FALSE	TRUE	FALSE
cg01269456	chr2	74154221	74154222	DGUOK	1716	267	CGI	FALSE	TRUE	FALSE
cg01420491	chr2	20834624	20834625	HS1BP3	64342	16238	Non-CGI	FALSE	TRUE	FALSE
cg01579289	chr2	71503740	71503741	ZNF638	27332	16	CGI	TRUE	FALSE	FALSE
cg01812947	chr2	240904978	240904979	MIR4786	100616417	-22466	CGI	FALSE	TRUE	FALSE
cg01841641	chr2	223169965	223169966	PAX3	5077	-6249	CGI-S-Shore	FALSE	FALSE	TRUE
cg01924952	chr2	8627933	8627934	LINC00299	339789	-159383	Non-CGI	FALSE	FALSE	TRUE
cg02069619	chr2	11885266	11885267	LPIN1	23175	67544	CGI-N-Shore	TRUE	TRUE	FALSE
cg02078517	chr2	75720511	75720512	EVA1A	84141	76335	CGI	FALSE	TRUE	FALSE
cg02109405	chr2	91671535	91671536	LOC654342	654342	176438	CGI	FALSE	FALSE	TRUE
cg02155398	chr2	45160490	45160491	SIX3	6496	-8545	CGI	FALSE	FALSE	TRUE
cg02367133	chr2	241612327	241612328	AQP12B	653437	9994	CGI	FALSE	FALSE	TRUE
cg02447239	chr2	235936137	235936138	SH3BP4	23677	75508	CGI	FALSE	TRUE	FALSE
cg02515309	chr2	232575911	232575912	MIR1244-1	100302285	-2111	CGI	FALSE	TRUE	FALSE
cg02700478	chr2	12856717	12856718	TRIB2	28951	-279	CGI	TRUE	FALSE	FALSE
cg03445151	chr2	23516881	23516882	KLHL29	114818	-91415	Non-CGI	FALSE	FALSE	TRUE
cg03480346	chr2	24232603	24232604	MFSD2B	388931	-348	CGI	TRUE	FALSE	FALSE
cg03531247	chr2	50573485	50573486	NRXN1	9378	686187	CGI-N-Shore	FALSE	TRUE	FALSE
cg03662049	chr2	164204829	164204830	FIGN	55137	387682	CGI	FALSE	FALSE	TRUE
cg03687070	chr2	16210108	16210109	MYCNOS	10408	-128262	Non-CGI	FALSE	FALSE	TRUE
cg03695591	chr2	223920391	223920392	KCNE4	23704	3528	CGI-S-Shelf	FALSE	FALSE	TRUE
cg04011338	chr2	238777587	238777588	RAMP1	10267	9399	CGI	FALSE	TRUE	FALSE
cg04157272	chr2	68017838	68017839	C1D	10438	272319	Non-CGI	FALSE	FALSE	TRUE
cg04351597	chr2	121523638	121523639	GLI2	2736	30438	Non-CGI	FALSE	TRUE	FALSE
cg04364261	chr2	219233650	219233651	C2orf62	375307	12070	CGI	TRUE	FALSE	FALSE
cg04667538	chr2	105372176	105372177	LOC284998	284998	1999	Non-CGI	TRUE	TRUE	FALSE
cg05509510	chr2	27006149	27006150	CENPA	1058	-2731	CGI-N-Shelf	FALSE	FALSE	TRUE
cg05783384	chr2	218843735	218843736	TNS1	7145	23981	CGI-S-Shore	TRUE	TRUE	FALSE
cg05864326	chr2	177030150	177030151	HOXD3	3232	1344	CGI	FALSE	TRUE	FALSE
cg06038358	chr2	128176007	128176008	PROC	5624	10	CGI-S-Shelf	TRUE	FALSE	FALSE
cg06118384	chr2	149645798	149645799	KIF5C	3800	13005	CGI	FALSE	TRUE	FALSE
cg06344576	chr2	220316415	220316416	SPEG	10290	16714	CGI-S-Shelf	TRUE	TRUE	FALSE
cg06398242	chr2	46049176	46049177	PRKCE	5581	170132	Non-CGI	FALSE	TRUE	FALSE
cg06621309	chr2	10443758	10443759	HPCAL1	3241	717	CGI	TRUE	TRUE	FALSE
cg06795827	chr2	3489129	3489130	ADI1	55256	34219	CGI-S-Shore	FALSE	FALSE	TRUE
cg06825448	chr2	240884925	240884926	MIR4786	100616417	-2413	CGI	FALSE	FALSE	TRUE
cg07075307	chr2	239695668	239695669	TWIST2	117581	-61003	CGI	FALSE	FALSE	TRUE
cg07531268	chr2	19551750	19551751	MIR4757	100616307	3559	CGI-S-Shore	FALSE	TRUE	FALSE
cg07772999	chr2	113993052	113993053	LOC654433	654433	-53	CGI	TRUE	TRUE	FALSE
cg07921384	chr2	220299740	220299741	SPEG	10290	39	CGI	TRUE	FALSE	FALSE
cg08076266	chr2	120190202	120190203	TMEM37	140738	755	CGI	FALSE	TRUE	FALSE
cg08077337	chr2	202900063	202900064	FZD7	8324	752	CGI	TRUE	FALSE	FALSE
cg08430329	chr2	73430374	73430375	NOTO	344022	987	CGI	FALSE	TRUE	FALSE
cg08467371	chr2	233180415	233180416	ALPP	250	-62931	Non-CGI	FALSE	TRUE	FALSE
cg08841544	chr2	9533755	9533756	ITGB1BP1	9270	29886	CGI-S-Shelf	FALSE	TRUE	FALSE
cg09042437	chr2	236643760	236643761	AGAP1	116987	241026	CGI	FALSE	TRUE	FALSE
cg09161446	chr2	240697468	240697469	LOC150935	150935	12913	CGI	FALSE	TRUE	FALSE
cg09238180	chr2	176993632	176993633	HOXD8	3234	-788	CGI	TRUE	FALSE	FALSE
cg09453076	chr2	235406275	235406276	ARL4C	10123	-581	CGI	TRUE	FALSE	FALSE
cg09514933	chr2	242605566	242605567	DTYMK	1841	20815	CGI-N-Shore	FALSE	TRUE	FALSE
cg09684233	chr2	175206966	175206967	SP9	100131390	7144	CGI	FALSE	FALSE	TRUE
cg09726982	chr2	220379016	220379017	ASIC4	55515	123	CGI-N-Shore	TRUE	FALSE	FALSE
cg10125317	chr2	176982230	176982231	HOXD10	3236	737	CGI	TRUE	FALSE	FALSE
cg10160614	chr2	239544973	239544974	LOC151171	151171	-80832	CGI-S-Shelf	FALSE	FALSE	TRUE
cg10515731	chr2	220378996	220378997	ASIC4	55515	103	CGI-N-Shore	TRUE	FALSE	FALSE
cg10599693	chr2	24300242	24300243	FAM228B	375190	513	CGI	TRUE	TRUE	FALSE
cg10767420	chr2	2581557	2581558	MYT1L	23040	-246511	CGI-N-Shelf	FALSE	FALSE	TRUE
cg10820045	chr2	198174542	198174543	ANKRD44	91526	977	CGI-N-Shore	FALSE	TRUE	FALSE
cg10830649	chr2	166650933	166650934	GALNT3	2591	234	CGI	TRUE	FALSE	FALSE
cg11229533	chr2	39893520	39893521	TMEM178A	130733	881	CGI	FALSE	TRUE	FALSE
cg11355217	chr2	109788188	109788189	MIR4265	100422863	-30143	CGI	FALSE	TRUE	FALSE
cg11395453	chr2	236643623	236643624	AGAP1	116987	240889	CGI	FALSE	TRUE	FALSE
cg11642891	chr2	3452563	3452564	TRAPPC12	51112	69116	CGI	FALSE	TRUE	FALSE
cg12162377	chr2	232261007	232261008	B3GNT7	93010	671	CGI	FALSE	TRUE	FALSE
cg12213062	chr2	220299653	220299654	SPEG	10290	-45	CGI	TRUE	FALSE	FALSE
cg12495283	chr2	105735689	105735690	MRPS9	64965	81205	CGI	FALSE	FALSE	TRUE
cg12524725	chr2	239427019	239427020	LOC151171	151171	37119	Non-CGI	FALSE	TRUE	FALSE
cg12619940	chr2	19551789	19551790	MIR4757	100616307	3598	CGI	FALSE	TRUE	FALSE
cg13008631	chr2	227663034	227663035	IRS1	3667	470	CGI	TRUE	FALSE	FALSE
cg13254588	chr2	40006314	40006315	THUMPD2	80745	100	CGI	TRUE	FALSE	FALSE
cg13274077	chr2	121334614	121334615	LOC84931	84931	-110688	CGI	FALSE	FALSE	TRUE
cg13278353	chr2	208635942	208635943	FZD5	7855	-1798	CGI	TRUE	FALSE	FALSE
cg13314434	chr2	239136349	239136350	LOC151174	151174	3967	CGI-S-Shore	FALSE	TRUE	FALSE
cg13345353	chr2	242715022	242715023	GAL3ST2	64090	-1216	CGI-S-Shore	TRUE	FALSE	FALSE
cg13546935	chr2	29033780	29033781	SPDYA	245711	28396	CGI	TRUE	TRUE	FALSE
cg13795465	chr2	31457061	31457062	EHD3	30845	180	CGI	TRUE	FALSE	FALSE
cg14131536	chr2	98340921	98340922	ZAP70	7535	10889	CGI	TRUE	TRUE	FALSE
cg14192401	chr2	233368543	233368544	ECEL1	9427	-16010	CGI	FALSE	FALSE	TRUE
cg14414903	chr2	240171712	240171713	MGC16025	85009	-54558	CGI	FALSE	TRUE	FALSE
cg14585167	chr2	709329	709330	TMEM18	129787	-31889	CGI	FALSE	FALSE	TRUE
cg14671764	chr2	1690592	1690593	PXDN	7837	57697	CGI-S-Shore	FALSE	TRUE	FALSE
cg14706297	chr2	43328266	43328267	ZFP36L2	678	125477	CGI	FALSE	FALSE	TRUE
cg14908680	chr2	241497846	241497847	DUSP28	285193	-1623	CGI-S-Shore	TRUE	TRUE	FALSE
cg14984341	chr2	97136729	97136730	NEURL3	93082	37115	CGI	FALSE	FALSE	TRUE
cg14994258	chr2	1647260	1647261	PXDN	7837	101029	Non-CGI	FALSE	TRUE	FALSE
cg15338159	chr2	106055507	106055508	FHL2	2274	-276	Non-CGI	TRUE	FALSE	FALSE
cg15750963	chr2	85645378	85645379	SH2D6	284948	-674	CGI-N-Shore	TRUE	FALSE	FALSE
cg16200531	chr2	135532566	135532567	TMEM163	81615	-7231	Non-CGI	FALSE	FALSE	TRUE
cg16260241	chr2	97215789	97215790	ARID5A	10865	13324	CGI-N-Shore	FALSE	TRUE	FALSE
cg16421411	chr2	10302391	10302392	C2orf48	348738	20409	Non-CGI	FALSE	TRUE	FALSE
cg16439198	chr2	38302674	38302675	CYP1B1	1545	647	CGI	FALSE	TRUE	FALSE
cg16472965	chr2	74881210	74881211	SEMA4F	10505	-181	CGI	TRUE	FALSE	FALSE
cg16873451	chr2	3106222	3106223	TSSC1	7260	275429	CGI-S-Shore	FALSE	TRUE	FALSE
cg16944964	chr2	228190352	228190353	MFF	56947	367	CGI	TRUE	TRUE	FALSE
cg17091056	chr2	54315563	54315564	ACYP2	98	-26845	Non-CGI	FALSE	FALSE	TRUE
cg17258703	chr2	237022779	237022780	GBX2	2637	53871	Non-CGI	FALSE	TRUE	FALSE
cg17300353	chr2	137522211	137522212	THSD7B	80731	-902	CGI-N-Shore	TRUE	FALSE	FALSE
cg17673769	chr2	46707773	46707774	TMEM247	388946	1068	CGI	FALSE	TRUE	FALSE
cg17815538	chr2	238536315	238536316	LRRFIP1	9208	90	CGI	TRUE	FALSE	FALSE
cg18406852	chr2	101010769	101010770	CHST10	9486	23359	CGI-S-Shore	FALSE	TRUE	FALSE
cg18844301	chr2	220379000	220379001	ASIC4	55515	107	CGI-N-Shore	TRUE	FALSE	FALSE
cg19075787	chr2	105372087	105372088	LOC284998	284998	2088	Non-CGI	TRUE	TRUE	FALSE
cg19269749	chr2	127951414	127951415	CYP27C1	339761	26238	CGI-S-Shore	FALSE	TRUE	FALSE
cg19426955	chr2	128422224	128422225	LIMS2	55679	17134	CGI-S-Shore	TRUE	TRUE	FALSE
cg19565305	chr2	178973019	178973020	PDE11A	50940	45	Non-CGI	TRUE	FALSE	FALSE
cg19610750	chr2	231714995	231714996	ITM2C	81618	-14624	CGI-S-Shore	FALSE	FALSE	TRUE
cg20002901	chr2	238777656	238777657	RAMP1	10267	9468	CGI	FALSE	TRUE	FALSE
cg20193363	chr2	947589	947590	SNTG2	54221	1034	CGI	FALSE	TRUE	FALSE
cg20225999	chr2	218843435	218843436	TNS1	7145	24281	CGI	FALSE	TRUE	FALSE
cg20495179	chr2	96689067	96689068	GPAT2	150763	12653	Non-CGI	FALSE	TRUE	FALSE
cg20506745	chr2	2581285	2581286	MYT1L	23040	-246239	CGI-N-Shelf	FALSE	FALSE	TRUE
cg20599798	chr2	31361760	31361761	GALNT14	79623	16306	CGI-S-Shore	TRUE	TRUE	FALSE
cg20624698	chr2	8092303	8092304	LOC339788	339788	24672	Non-CGI	FALSE	TRUE	FALSE
cg20679626	chr2	489360	489361	TMEM18	129787	188077	CGI	FALSE	FALSE	TRUE
cg20719980	chr2	36616441	36616442	CRIM1	51232	33070	Non-CGI	FALSE	TRUE	FALSE
cg20804050	chr2	119605441	119605442	EN1	2019	316	CGI-S-Shore	TRUE	FALSE	FALSE
cg21083314	chr2	27994244	27994245	MRPL33	9553	-338	CGI-N-Shore	TRUE	FALSE	FALSE
cg21384645	chr2	176957304	176957305	HOXD13	3239	-226	CGI	TRUE	FALSE	FALSE
cg22029015	chr2	236674257	236674258	AGAP1	116987	271523	CGI	FALSE	TRUE	FALSE
cg22061831	chr2	131721692	131721693	ARHGEF4	50649	48905	CGI	FALSE	TRUE	FALSE
cg22157027	chr2	10638113	10638114	ODC1	4953	-49659	CGI	FALSE	FALSE	TRUE
cg23032184	chr2	121523682	121523683	GLI2	2736	30482	Non-CGI	FALSE	TRUE	FALSE
cg23079012	chr2	8343710	8343711	LINC00299	339789	124837	Non-CGI	FALSE	TRUE	FALSE
cg23302730	chr2	201542610	201542611	AOX2P	344454	-17834	Non-CGI	FALSE	FALSE	TRUE
cg23371016	chr2	1565328	1565329	PXDN	7837	182961	CGI-N-Shore	FALSE	FALSE	TRUE
cg23413809	chr2	45233773	45233774	SIX2	10736	2767	CGI-S-Shore	FALSE	TRUE	FALSE
cg23424933	chr2	45157613	45157614	SIX3	6496	-11422	CGI	FALSE	FALSE	TRUE
cg23467747	chr2	237022740	237022741	GBX2	2637	53910	Non-CGI	FALSE	TRUE	FALSE
cg23927687	chr2	233766118	233766119	C2orf82	389084	31123	CGI	TRUE	TRUE	FALSE
cg24772753	chr2	171573419	171573420	SP5	389058	1561	CGI	FALSE	TRUE	FALSE
cg24995678	chr2	235936394	235936395	SH3BP4	23677	75765	CGI	FALSE	TRUE	FALSE
cg25033515	chr2	8234834	8234835	LOC339788	339788	-117856	Non-CGI	FALSE	TRUE	FALSE
cg25308803	chr2	109746735	109746736	SH3RF3-AS1	100287216	-159	CGI	TRUE	TRUE	FALSE
cg25946059	chr2	242973936	242973937	LOC728323	728323	-56906	CGI	FALSE	FALSE	TRUE
cg25954914	chr2	54785183	54785184	RPL23AP32	56969	28823	CGI	TRUE	TRUE	FALSE
cg26890182	chr2	135621176	135621177	ACMSD	130013	24989	Non-CGI	FALSE	TRUE	FALSE
cg27291468	chr2	9878816	9878817	TAF1B	9014	-104753	Non-CGI	FALSE	FALSE	TRUE
cg27405400	chr2	127839539	127839540	BIN1	274	25362	CGI-N-Shelf	TRUE	TRUE	FALSE
cg27506082	chr2	207139431	207139432	ZDBF2	57683	-90	CGI	TRUE	FALSE	FALSE
cg27604702	chr2	233793088	233793089	C2orf82	389084	58093	CGI	TRUE	TRUE	FALSE
cg00088464	chr3	128780893	128780894	GP9	2815	1247	CGI-N-Shore	TRUE	TRUE	FALSE
cg00702638	chr3	44803293	44803294	KIF15	56992	83	CGI	TRUE	FALSE	FALSE
cg01005211	chr3	72338583	72338584	LOC201617	201617	138174	Non-CGI	FALSE	FALSE	TRUE
cg01520402	chr3	142790398	142790399	CHST2	9435	-48218	Non-CGI	FALSE	FALSE	TRUE
cg01566555	chr3	125931744	125931745	ALDH1L1	10840	-32258	CGI-N-Shore	FALSE	FALSE	TRUE
cg01822130	chr3	96534005	96534006	EPHA6	285220	579	CGI	FALSE	TRUE	FALSE
cg02119363	chr3	179754603	179754604	PEX5L	51555	-85	CGI	TRUE	FALSE	FALSE
cg02220837	chr3	5024773	5024774	BHLHE40-AS1	100507582	-3126	CGI	FALSE	TRUE	FALSE
cg02251567	chr3	49459940	49459941	AMT	275	169	CGI-S-Shore	TRUE	TRUE	FALSE
cg02342415	chr3	12940876	12940877	RPL32	6161	-57794	CGI	FALSE	TRUE	FALSE
cg02578087	chr3	8671361	8671362	LINC00312	29931	57892	Non-CGI	FALSE	TRUE	FALSE
cg03287940	chr3	24537338	24537339	THRB	7068	-884	CGI	TRUE	FALSE	FALSE
cg03784611	chr3	196754501	196754502	MFI2	4241	2184	CGI-N-Shore	FALSE	TRUE	FALSE
cg03862437	chr3	194353432	194353433	TMEM44	93109	984	CGI-S-Shore	FALSE	TRUE	FALSE
cg04120686	chr3	169384410	169384411	MECOM	2122	-2846	CGI	FALSE	FALSE	TRUE
cg04350287	chr3	52326883	52326884	MIR135A1	406925	1439	Non-CGI	TRUE	TRUE	FALSE
cg04394267	chr3	55523950	55523951	WNT5A	7474	-2618	CGI	FALSE	FALSE	TRUE
cg05467676	chr3	72226965	72226966	LOC201617	201617	26556	Non-CGI	FALSE	FALSE	TRUE
cg05583921	chr3	42700678	42700679	ZBTB47	92999	5501	CGI-S-Shore	FALSE	TRUE	FALSE
cg05643613	chr3	11592649	11592650	VGLL4	9686	169569	CGI-N-Shore	FALSE	TRUE	FALSE
cg05726764	chr3	179399579	179399580	USP13	8975	28645	CGI	FALSE	TRUE	FALSE
cg05768427	chr3	127634188	127634189	KBTBD12	166348	-128	CGI	TRUE	FALSE	FALSE
cg06085877	chr3	42304966	42304967	CCK	885	2694	CGI-N-Shore	FALSE	TRUE	FALSE
cg06793267	chr3	57993846	57993847	FLNB	2317	-279	CGI-N-Shore	TRUE	FALSE	FALSE
cg07068191	chr3	192959176	192959177	HRASLS	57110	257	CGI	TRUE	FALSE	FALSE
cg07081887	chr3	128880349	128880350	ISY1-RAB43	100534599	-275	CGI	TRUE	FALSE	FALSE
cg07115462	chr3	12584270	12584271	LOC100129480	100129480	2691	Non-CGI	FALSE	TRUE	FALSE
cg07231955	chr3	169386507	169386508	MECOM	2122	-4943	CGI	FALSE	FALSE	TRUE
cg07357827	chr3	12200835	12200836	TIMP4	7079	14	CGI-S-Shore	TRUE	TRUE	FALSE
cg07448319	chr3	40547217	40547218	ZNF620	253639	-311	CGI-N-Shore	TRUE	FALSE	FALSE
cg07581811	chr3	184491461	184491462	VPS8	23355	-38468	CGI	FALSE	FALSE	TRUE
cg07744841	chr3	10857703	10857704	SLC6A11	6538	-212	CGI	TRUE	FALSE	FALSE
cg07757611	chr3	52559064	52559065	NT5DC2	64943	10027	CGI	FALSE	TRUE	FALSE
cg07864883	chr3	42743077	42743078	HHATL	57467	1240	Non-CGI	TRUE	TRUE	FALSE
cg08154107	chr3	183994073	183994074	CAMK2N2	94032	-14821	CGI	TRUE	TRUE	FALSE
cg08855170	chr3	27756139	27756140	EOMES	8320	8065	CGI	FALSE	FALSE	TRUE
cg08979515	chr3	111697575	111697576	ABHD10	55347	-251	CGI	TRUE	FALSE	FALSE
cg09009275	chr3	14220114	14220115	XPC	7508	56	CGI	TRUE	FALSE	FALSE
cg09087110	chr3	50540261	50540262	CACNA2D2	9254	629	CGI-N-Shore	FALSE	TRUE	FALSE
cg09380805	chr3	169384034	169384035	MECOM	2122	-2470	CGI-N-Shore	FALSE	FALSE	TRUE
cg10701252	chr3	55508585	55508586	WNT5A	7474	12744	CGI	FALSE	TRUE	FALSE
cg11118235	chr3	50284010	50284011	GNAI2	2771	20285	Non-CGI	TRUE	TRUE	FALSE
cg11390741	chr3	37807702	37807703	CTDSPL	10217	-95965	Non-CGI	FALSE	TRUE	FALSE
cg11733272	chr3	46940439	46940440	PTH1R	5745	21202	CGI	FALSE	TRUE	FALSE
cg11830761	chr3	126007485	126007486	KLF15	28999	68749	CGI	FALSE	FALSE	TRUE
cg11866943	chr3	52529351	52529352	STAB1	23166	-3	Non-CGI	TRUE	FALSE	FALSE
cg12177944	chr3	129322537	129322538	PLXND1	23129	3043	CGI-N-Shore	FALSE	TRUE	FALSE
cg12415479	chr3	129311698	129311699	PLXND1	23129	13882	Non-CGI	FALSE	TRUE	FALSE
cg12836959	chr3	147098568	147098569	ZIC4	84107	26026	CGI	FALSE	FALSE	TRUE
cg12934382	chr3	51741135	51741136	GRM2	2912	53	CGI	TRUE	FALSE	FALSE
cg13026730	chr3	71804139	71804140	EIF4E3	317649	-214	CGI	TRUE	FALSE	FALSE
cg14044282	chr3	61728795	61728796	PTPRG	5793	181551	CGI	FALSE	TRUE	FALSE
cg14637144	chr3	196750506	196750507	MFI2	4241	6179	CGI	FALSE	TRUE	FALSE
cg14875327	chr3	197081654	197081655	DLG1	1739	-55510	Non-CGI	FALSE	FALSE	TRUE
cg15159420	chr3	195545327	195545328	MUC4	4585	-6482	CGI	FALSE	FALSE	TRUE
cg15473186	chr3	53530075	53530076	CACNA1D	776	1043	CGI	FALSE	TRUE	FALSE
cg16529883	chr3	50191944	50191945	SEMA3F	6405	-902	CGI-N-Shore	TRUE	TRUE	FALSE
cg16924010	chr3	194018158	194018159	LOC100131551	100131551	12433	CGI-S-Shelf	FALSE	TRUE	FALSE
cg17321883	chr3	49756736	49756737	AMIGO3	386724	500	CGI	TRUE	TRUE	FALSE
cg17759082	chr3	122920507	122920508	SEC22A	26984	-265	CGI-N-Shore	TRUE	FALSE	FALSE
cg18531004	chr3	128564980	128564981	LOC653712	653712	25402	CGI	TRUE	FALSE	FALSE
cg18562578	chr3	55517853	55517854	WNT5A	7474	3476	CGI	FALSE	TRUE	FALSE
cg18768347	chr3	5024849	5024850	BHLHE40-AS1	100507582	-3202	CGI	FALSE	TRUE	FALSE
cg18768784	chr3	141516271	141516272	GRK7	131890	19227	CGI	FALSE	TRUE	FALSE
cg19388776	chr3	71835112	71835113	PROK2	60675	-754	CGI	TRUE	FALSE	FALSE
cg19955173	chr3	195603697	195603698	TNK2	10188	35117	CGI-S-Shore	FALSE	TRUE	FALSE
cg20037507	chr3	62363248	62363249	FEZF2	55079	-4057	CGI	FALSE	FALSE	TRUE
cg21177463	chr3	48732781	48732782	NCKIPSD	51517	-9446	Non-CGI	TRUE	TRUE	FALSE
cg21303011	chr3	24537177	24537178	THRB	7068	-723	CGI	TRUE	FALSE	FALSE
cg21664636	chr3	70432664	70432665	MITF	4286	644077	Non-CGI	FALSE	FALSE	TRUE
cg21788045	chr3	115984319	115984320	LSAMP	4045	180064	Non-CGI	FALSE	TRUE	FALSE
cg22259698	chr3	126137567	126137568	CCDC37	348807	23784	CGI-S-Shelf	FALSE	TRUE	FALSE
cg23189410	chr3	147125712	147125713	ZIC4	84107	-1115	CGI-S-Shore	TRUE	FALSE	FALSE
cg23456221	chr3	55518441	55518442	WNT5A	7474	2888	CGI	FALSE	TRUE	FALSE
cg24036280	chr3	62365402	62365403	FEZF2	55079	-6211	CGI-S-Shore	FALSE	FALSE	TRUE
cg24051057	chr3	112358409	112358410	CCDC80	151887	1566	Non-CGI	TRUE	TRUE	FALSE
cg24159247	chr3	4575483	4575484	ITPR1	3708	40450	Non-CGI	FALSE	TRUE	FALSE
cg24169875	chr3	42700203	42700204	ZBTB47	92999	5026	CGI	FALSE	TRUE	FALSE
cg24216596	chr3	55518142	55518143	WNT5A	7474	3187	CGI	FALSE	TRUE	FALSE
cg24888989	chr3	44803291	44803292	KIF15	56992	81	CGI	TRUE	FALSE	FALSE
cg24902987	chr3	138170766	138170767	ESYT3	83850	17350	CGI	FALSE	TRUE	FALSE
cg25164490	chr3	140812477	140812478	SPSB4	92369	41733	Non-CGI	FALSE	TRUE	FALSE
cg25221442	chr3	197183582	197183583	BDH1	622	116610	CGI	FALSE	FALSE	TRUE
cg25336332	chr3	24537309	24537310	THRB	7068	-855	CGI	TRUE	FALSE	FALSE
cg25743481	chr3	44803289	44803290	KIF15	56992	79	CGI	TRUE	FALSE	FALSE
cg26065870	chr3	52522591	52522592	STAB1	23166	-6763	CGI-S-Shore	TRUE	TRUE	FALSE
cg26263234	chr3	26666060	26666061	LRRC3B	116135	1759	CGI	TRUE	TRUE	FALSE
cg26292910	chr3	48732762	48732763	NCKIPSD	51517	-9427	Non-CGI	TRUE	TRUE	FALSE
cg26344982	chr3	5024811	5024812	BHLHE40-AS1	100507582	-3164	CGI	FALSE	TRUE	FALSE
cg27316567	chr3	149832476	149832477	LOC646903	646903	143409	Non-CGI	FALSE	FALSE	TRUE
cg27326062	chr3	109115422	109115423	FLJ25363	401082	-13413	CGI	FALSE	FALSE	TRUE
cg27364162	chr3	55517806	55517807	WNT5A	7474	3523	CGI	FALSE	TRUE	FALSE
cg00025972	chr4	187762312	187762313	FAT1	2195	-114461	Non-CGI	FALSE	FALSE	TRUE
cg00245896	chr4	8034100	8034101	AFAP1	60312	-92446	CGI-N-Shore	FALSE	TRUE	FALSE
cg00339488	chr4	155254194	155254195	DCHS2	54798	158734	CGI	FALSE	TRUE	FALSE
cg00485849	chr4	74486170	74486171	RASSF6	166824	168	Non-CGI	TRUE	FALSE	FALSE
cg00718036	chr4	108745325	108745326	SGMS2	166929	-394	CGI-N-Shore	TRUE	FALSE	FALSE
cg01203651	chr4	187762256	187762257	FAT1	2195	-114405	Non-CGI	FALSE	FALSE	TRUE
cg01572696	chr4	995849	995850	SLC26A1	10861	-8624	CGI	FALSE	TRUE	FALSE
cg01638225	chr4	1202930	1202931	LOC100130872	100130872	-179	CGI-S-Shore	TRUE	FALSE	FALSE
cg02071418	chr4	174439060	174439061	HAND2	9464	12316	CGI	FALSE	FALSE	TRUE
cg02650266	chr4	147558239	147558240	POU4F2	5458	-1804	CGI	TRUE	FALSE	FALSE
cg02674186	chr4	88784891	88784892	HSP90AB3P	3327	-28102	CGI-N-Shore	FALSE	FALSE	TRUE
cg02853152	chr4	6690702	6690703	S100P	6286	-4862	CGI	FALSE	FALSE	TRUE
cg02936451	chr4	62066211	62066212	LPHN3	23284	-761	CGI	TRUE	FALSE	FALSE
cg03184290	chr4	111550666	111550667	PITX2	5308	12611	CGI	FALSE	TRUE	FALSE
cg03463729	chr4	187666302	187666303	FAT1	2195	-18451	CGI-N-Shore	FALSE	FALSE	TRUE
cg04186606	chr4	680656	680657	MFSD7	84179	2315	CGI-S-Shore	TRUE	TRUE	FALSE
cg04228083	chr4	1202657	1202658	LOC100130872	100130872	91	CGI	TRUE	FALSE	FALSE
cg04997045	chr4	1240068	1240069	CTBP1	1487	2838	CGI	FALSE	TRUE	FALSE
cg05021846	chr4	48485293	48485294	SLC10A4	201780	-65	CGI	TRUE	FALSE	FALSE
cg05155840	chr4	174448841	174448842	HAND2	9464	2535	CGI	FALSE	TRUE	FALSE
cg05242526	chr4	86396103	86396104	ARHGAP24	83478	-179	CGI	TRUE	FALSE	FALSE
cg05267427	chr4	146831054	146831055	ZNF827	152485	28551	Non-CGI	FALSE	TRUE	FALSE
cg05551114	chr4	15376116	15376117	C1QTNF7	114905	34555	CGI-N-Shore	TRUE	TRUE	FALSE
cg05600350	chr4	4858598	4858599	MSX1	4487	-2792	CGI	FALSE	FALSE	TRUE
cg06219310	chr4	802229	802230	CPLX1	10815	17714	CGI-N-Shore	FALSE	TRUE	FALSE
cg06464962	chr4	74719289	74719290	PF4V1	5197	275	Non-CGI	FALSE	TRUE	FALSE
cg06966113	chr4	4873263	4873264	MSX1	4487	11870	CGI	FALSE	FALSE	TRUE
cg07538039	chr4	15376135	15376136	C1QTNF7	114905	34574	CGI-N-Shore	TRUE	TRUE	FALSE
cg07681935	chr4	174452461	174452462	NBLA00301	79804	851	CGI	TRUE	TRUE	FALSE
cg08219218	chr4	151503501	151503502	MAB21L2	10586	423	CGI	TRUE	TRUE	FALSE
cg08297751	chr4	174448705	174448706	HAND2	9464	2671	CGI	FALSE	TRUE	FALSE
cg08384155	chr4	119948360	119948361	MYOZ2	51778	-108577	Non-CGI	FALSE	TRUE	FALSE
cg08774969	chr4	1006240	1006241	FGFRL1	53834	1299	CGI	FALSE	TRUE	FALSE
cg08791953	chr4	8307888	8307889	HTRA3	94031	36398	CGI	FALSE	TRUE	FALSE
cg08886695	chr4	3369023	3369024	RGS12	6002	74267	CGI-S-Shelf	FALSE	TRUE	FALSE
cg09558281	chr4	27102927	27102928	STIM2	57620	240613	Non-CGI	FALSE	FALSE	TRUE
cg09781994	chr4	111548118	111548119	PITX2	5308	15159	CGI-N-Shore	FALSE	TRUE	FALSE
cg09884389	chr4	129731315	129731316	PHF17	79960	535	CGI-S-Shore	TRUE	TRUE	FALSE
cg10203211	chr4	185018682	185018683	ENPP6	133121	120430	CGI	FALSE	TRUE	FALSE
cg10334767	chr4	10459128	10459129	ZNF518B	85460	-95	CGI	TRUE	FALSE	FALSE
cg10391633	chr4	111558464	111558465	PITX2	5308	4813	CGI	TRUE	TRUE	FALSE
cg10754215	chr4	8073804	8073805	ABLIM2	84448	86753	CGI	TRUE	TRUE	FALSE
cg10930664	chr4	8307813	8307814	HTRA3	94031	36323	CGI	FALSE	TRUE	FALSE
cg11104416	chr4	1202861	1202862	LOC100130872	100130872	-110	CGI-S-Shore	TRUE	FALSE	FALSE
cg11236429	chr4	174459412	174459413	NBLA00301	79804	7802	CGI	FALSE	TRUE	FALSE
cg11553618	chr4	185905046	185905047	HELT	391723	-34947	CGI-N-Shore	FALSE	FALSE	TRUE
cg11951974	chr4	8608486	8608487	CPZ	8532	26268	CGI	FALSE	TRUE	FALSE
cg12379463	chr4	146727004	146727005	C4orf51	646603	125647	Non-CGI	FALSE	TRUE	FALSE
cg12525219	chr4	1228640	1228641	CTBP1	1487	14266	CGI	FALSE	TRUE	FALSE
cg12573747	chr4	3234417	3234418	MSANTD1	345222	-16348	CGI-S-Shelf	FALSE	TRUE	FALSE
cg13042918	chr4	119948542	119948543	MYOZ2	51778	-108395	Non-CGI	FALSE	TRUE	FALSE
cg13096007	chr4	24802340	24802341	SOD3	6649	5254	CGI	FALSE	TRUE	FALSE
cg13506653	chr4	54965863	54965864	GSX2	170825	-383	CGI	TRUE	TRUE	FALSE
cg13871187	chr4	7967393	7967394	AFAP1	60312	-25739	CGI	FALSE	TRUE	FALSE
cg14527262	chr4	1202653	1202654	LOC100130872	100130872	95	CGI	TRUE	FALSE	FALSE
cg14660125	chr4	89378460	89378461	HERC5	51191	191	CGI	TRUE	FALSE	FALSE
cg14686113	chr4	54965829	54965830	GSX2	170825	-417	CGI-N-Shore	TRUE	TRUE	FALSE
cg14704921	chr4	53728654	53728655	RASL11B	65997	158	CGI	TRUE	FALSE	FALSE
cg14717666	chr4	119862992	119862993	SYNPO2	171024	52995	Non-CGI	FALSE	TRUE	FALSE
cg14866595	chr4	4873442	4873443	MSX1	4487	12049	CGI	FALSE	FALSE	TRUE
cg14959746	chr4	7987834	7987835	AFAP1	60312	-46180	CGI	FALSE	TRUE	FALSE
cg15203271	chr4	1203168	1203169	LOC100130872	100130872	-417	CGI	TRUE	FALSE	FALSE
cg16364495	chr4	40859251	40859252	NSUN7	79730	107336	CGI	TRUE	TRUE	FALSE
cg16413428	chr4	6114627	6114628	JAKMIP1	152789	87689	CGI	TRUE	TRUE	FALSE
cg16823009	chr4	146823969	146823970	ZNF827	152485	35636	Non-CGI	FALSE	TRUE	FALSE
cg17023254	chr4	908859	908860	GAK	2580	17313	CGI	FALSE	TRUE	FALSE
cg17433772	chr4	151501739	151501740	MAB21L2	10586	-1336	CGI-S-Shore	TRUE	TRUE	FALSE
cg17764818	chr4	190750967	190750968	FRG1	2483	-111005	CGI	FALSE	FALSE	TRUE
cg17949969	chr4	8073790	8073791	ABLIM2	84448	86767	CGI	TRUE	TRUE	FALSE
cg18011273	chr4	7203326	7203327	SORCS2	57537	8951	CGI	FALSE	TRUE	FALSE
cg18999185	chr4	8386198	8386199	TRMT44	152992	-54404	CGI-N-Shelf	FALSE	TRUE	FALSE
cg19777067	chr4	174440103	174440104	HAND2	9464	11273	CGI	FALSE	FALSE	TRUE
cg20450979	chr4	176923542	176923543	GPM6A	2823	104	CGI	TRUE	FALSE	FALSE
cg20729813	chr4	7502429	7502430	MIR4274	100422826	40673	CGI-N-Shore	FALSE	TRUE	FALSE
cg21082272	chr4	1202966	1202967	LOC100130872	100130872	-215	CGI-S-Shore	TRUE	FALSE	FALSE
cg21150843	chr4	153641409	153641410	TMEM154	201799	-40091	Non-CGI	FALSE	FALSE	TRUE
cg21985631	chr4	175138377	175138378	CEP44	80817	-66449	CGI	FALSE	TRUE	FALSE
cg22017213	chr4	86851225	86851226	MIR4451	100616349	207603	Non-CGI	TRUE	TRUE	FALSE
cg22117825	chr4	174439478	174439479	HAND2	9464	11898	CGI	FALSE	FALSE	TRUE
cg22599477	chr4	25507245	25507246	ANAPC4	29945	128396	CGI	FALSE	FALSE	TRUE
cg22974236	chr4	4867979	4867980	MSX1	4487	6586	CGI	FALSE	FALSE	TRUE
cg23186787	chr4	4380004	4380005	NSG1	27065	30134	Non-CGI	FALSE	TRUE	FALSE
cg23210109	chr4	3250690	3250691	MSANTD1	345222	-75	CGI-N-Shore	TRUE	FALSE	FALSE
cg23442198	chr4	187126114	187126115	CYP4V2	285440	13439	CGI-S-Shore	FALSE	TRUE	FALSE
cg23447233	chr4	1295047	1295048	MAEA	10296	11374	CGI	FALSE	TRUE	FALSE
cg23663774	chr4	111555440	111555441	PITX2	5308	7837	CGI	TRUE	TRUE	FALSE
cg23735712	chr4	40858984	40858985	NSUN7	79730	107069	CGI	FALSE	TRUE	FALSE
cg24200107	chr4	189204296	189204297	LOC401164	401164	-117592	CGI	FALSE	FALSE	TRUE
cg24483247	chr4	5890411	5890412	CRMP1	1400	4372	CGI	TRUE	TRUE	FALSE
cg24919468	chr4	185195769	185195770	ENPP6	133121	-56654	Non-CGI	FALSE	FALSE	TRUE
cg24934400	chr4	4873966	4873967	MSX1	4487	12573	CGI	FALSE	FALSE	TRUE
cg25913520	chr4	13524041	13524042	LOC285547	285547	8998	CGI-N-Shore	FALSE	FALSE	TRUE
cg26590411	chr4	119199646	119199647	SNHG8	100093630	-269	CGI-N-Shore	TRUE	FALSE	FALSE
cg26708319	chr4	111552040	111552041	PITX2	5308	11237	CGI	FALSE	TRUE	FALSE
cg27096232	chr4	3287777	3287778	RGS12	6002	-6976	CGI	FALSE	FALSE	TRUE
cg27173148	chr4	1203001	1203002	LOC100130872	100130872	-250	CGI	TRUE	FALSE	FALSE
cg27218796	chr4	174448128	174448129	HAND2	9464	3248	CGI	FALSE	TRUE	FALSE
cg00213479	chr5	2038899	2038900	IRX4	50805	-156018	CGI	FALSE	FALSE	TRUE
cg00540540	chr5	167219531	167219532	WWC1	23286	-499532	Non-CGI	FALSE	TRUE	FALSE
cg00989249	chr5	177548398	177548399	N4BP3	23138	7841	CGI	TRUE	TRUE	FALSE
cg01010188	chr5	172753741	172753742	STC2	8614	2763	CGI	FALSE	TRUE	FALSE
cg01277506	chr5	80690205	80690206	ACOT12	134526	-216	CGI	TRUE	TRUE	FALSE
cg01885839	chr5	111017556	111017557	STARD4	134429	-169322	Non-CGI	FALSE	TRUE	FALSE
cg02061173	chr5	77805555	77805556	LHFPL2	10184	139091	CGI-N-Shore	FALSE	TRUE	FALSE
cg02081006	chr5	122430434	122430435	PRDM6	93166	5592	CGI	FALSE	TRUE	FALSE
cg02270010	chr5	175958651	175958652	RNF44	22838	6373	CGI-S-Shore	TRUE	TRUE	FALSE
cg02353814	chr5	135146660	135146661	SLC25A48	153328	-23703	Non-CGI	FALSE	FALSE	TRUE
cg03871267	chr5	67483475	67483476	PIK3R1	5295	-28107	CGI	FALSE	FALSE	TRUE
cg03999941	chr5	957511	957512	LOC100506688	100506688	39942	CGI-S-Shore	FALSE	FALSE	TRUE
cg04058281	chr5	980580	980581	LOC100506688	100506688	16873	CGI-S-Shore	FALSE	FALSE	TRUE
cg04073265	chr5	1442923	1442924	SLC6A3	6531	2618	CGI	FALSE	TRUE	FALSE
cg04101060	chr5	134364968	134364969	PITX1	5307	4994	CGI	FALSE	TRUE	FALSE
cg04187185	chr5	43396953	43396954	CCL28	56477	15533	CGI	FALSE	TRUE	FALSE
cg04466840	chr5	176784719	176784720	RGS14	10636	-123	CGI-N-Shore	TRUE	FALSE	FALSE
cg04500312	chr5	142054663	142054664	FGF1	2246	22970	Non-CGI	FALSE	TRUE	FALSE
cg04728073	chr5	133388535	133388536	VDAC1	7416	-47710	Non-CGI	FALSE	FALSE	TRUE
cg05017994	chr5	964562	964563	LOC100506688	100506688	32891	CGI-N-Shore	FALSE	FALSE	TRUE
cg05478818	chr5	40835740	40835741	RPL37	6167	-352	CGI	TRUE	FALSE	FALSE
cg05521538	chr5	1258994	1258995	SLC6A18	348932	33523	CGI-S-Shore	FALSE	TRUE	FALSE
cg05560697	chr5	141392853	141392854	GNPDA1	10007	-232	CGI-S-Shore	TRUE	FALSE	FALSE
cg05573381	chr5	1653258	1653259	LOC728613	728613	-19137	CGI-N-Shore	FALSE	FALSE	TRUE
cg06040811	chr5	88018605	88018606	LINC00461	645323	-37984	CGI	FALSE	TRUE	FALSE
cg06429214	chr5	110062417	110062418	TMEM232	642987	31	Non-CGI	TRUE	FALSE	FALSE
cg06532574	chr5	95295740	95295741	ELL2	22936	2033	CGI-N-Shore	FALSE	TRUE	FALSE
cg06564388	chr5	153855257	153855258	HAND1	9421	2565	CGI	FALSE	TRUE	FALSE
cg06850513	chr5	175955092	175955093	RNF44	22838	9932	CGI-N-Shore	FALSE	TRUE	FALSE
cg06951565	chr5	178420527	178420528	GRM6	2916	1595	CGI	FALSE	TRUE	FALSE
cg06976144	chr5	3182057	3182058	LOC285577	285577	354149	CGI	FALSE	FALSE	TRUE
cg07350977	chr5	27038836	27038837	CDH9	1007	-146	Non-CGI	TRUE	FALSE	FALSE
cg07492045	chr5	180257795	180257796	LINC00847	729678	835	CGI-N-Shore	TRUE	FALSE	FALSE
cg07525751	chr5	1416958	1416959	SLC6A3	6531	28583	CGI	FALSE	TRUE	FALSE
cg08373003	chr5	134367099	134367100	PITX1	5307	2863	CGI	TRUE	TRUE	FALSE
cg08698198	chr5	92684137	92684138	FLJ42709	441094	232864	CGI-N-Shore	FALSE	FALSE	TRUE
cg08705647	chr5	132608124	132608125	MIR1289-2	100302134	155272	Non-CGI	FALSE	TRUE	FALSE
cg09508356	chr5	1346092	1346093	CLPTM1L	81037	-1089	CGI	TRUE	FALSE	FALSE
cg09867598	chr5	122429517	122429518	PRDM6	93166	4675	CGI-N-Shore	FALSE	TRUE	FALSE
cg10441628	chr5	159399432	159399433	TTC1	7265	-36746	CGI	FALSE	TRUE	FALSE
cg10528482	chr5	525771	525772	SLC9A3	6550	-1221	CGI-S-Shore	TRUE	FALSE	FALSE
cg10864145	chr5	43397232	43397233	CCL28	56477	15254	CGI	TRUE	TRUE	FALSE
cg11021940	chr5	115299475	115299476	AQPEP	206338	1323	CGI	TRUE	TRUE	FALSE
cg11200917	chr5	151305111	151305112	GLRA1	2741	-713	CGI	TRUE	FALSE	FALSE
cg11403027	chr5	42971411	42971412	LOC648987	648987	47500	CGI	FALSE	FALSE	TRUE
cg11449873	chr5	179763055	179763056	GFPT2	9945	17258	CGI	FALSE	TRUE	FALSE
cg11625005	chr5	1295737	1295738	TERT	7015	-574	CGI	TRUE	FALSE	FALSE
cg11816734	chr5	3962434	3962435	IRX1	79192	366265	CGI	FALSE	FALSE	TRUE
cg11936311	chr5	178957434	178957435	RUFY1	80230	-20135	CGI	FALSE	FALSE	TRUE
cg11965881	chr5	171765653	171765654	UBTD2	92181	-54857	CGI-N-Shore	FALSE	TRUE	FALSE
cg12151443	chr5	14461314	14461315	FAM105A	54491	-120575	CGI	FALSE	TRUE	FALSE
cg12378867	chr5	7827486	7827487	C5orf49	134121	23776	CGI	FALSE	TRUE	FALSE
cg12436377	chr5	87440296	87440297	TMEM161B	153396	124367	CGI	FALSE	FALSE	TRUE
cg12634932	chr5	43397230	43397231	CCL28	56477	15256	CGI	TRUE	TRUE	FALSE
cg12833872	chr5	501863	501864	SLC9A3	6550	22684	CGI	FALSE	TRUE	FALSE
cg12980127	chr5	2129874	2129875	IRX4	50805	-246993	CGI	FALSE	FALSE	TRUE
cg13005202	chr5	1555844	1555845	LPCAT1	79888	-31767	CGI-S-Shelf	FALSE	FALSE	TRUE
cg13005591	chr5	79627474	79627475	SPZ1	84654	11683	CGI	FALSE	FALSE	TRUE
cg13340126	chr5	502034	502035	SLC9A3	6550	22513	CGI	FALSE	TRUE	FALSE
cg14098951	chr5	176875120	176875121	PRR7-AS1	340037	-174	CGI-S-Shore	TRUE	TRUE	FALSE
cg14462307	chr5	179267556	179267557	C5orf45	51149	18282	CGI	TRUE	TRUE	FALSE
cg14480446	chr5	87989154	87989155	LINC00461	645323	-8533	CGI	FALSE	FALSE	TRUE
cg14753321	chr5	176784914	176784915	RGS14	10636	69	CGI	TRUE	FALSE	FALSE
cg15640734	chr5	494837	494838	PP7080	25845	-21756	CGI-S-Shore	FALSE	TRUE	FALSE
cg15831743	chr5	122421924	122421925	PRDM6	93166	-2915	CGI-N-Shore	FALSE	FALSE	TRUE
cg15900444	chr5	139154848	139154849	PSD2	84249	-20556	CGI-N-Shore	FALSE	FALSE	TRUE
cg15911153	chr5	138730783	138730784	PROB1	389333	100	CGI	TRUE	FALSE	FALSE
cg16019898	chr5	140700602	140700603	TAF7	6879	-250	CGI	TRUE	FALSE	FALSE
cg16051228	chr5	1294576	1294577	TERT	7015	584	CGI	FALSE	TRUE	FALSE
cg16055026	chr5	87974547	87974548	LINC00461	645323	6071	CGI	TRUE	TRUE	FALSE
cg16272981	chr5	1489889	1489890	LPCAT1	79888	34185	CGI	FALSE	TRUE	FALSE
cg17290488	chr5	179281560	179281561	C5orf45	51149	4278	CGI-N-Shelf	FALSE	TRUE	FALSE
cg17438030	chr5	72526379	72526380	TMEM174	134288	57355	CGI	FALSE	FALSE	TRUE
cg17496661	chr5	3326343	3326344	LOC285577	285577	209863	CGI-S-Shore	FALSE	FALSE	TRUE
cg17654660	chr5	176784965	176784966	RGS14	10636	120	CGI	TRUE	FALSE	FALSE
cg17721879	chr5	158532473	158532474	EBF1	1879	-5684	CGI	FALSE	TRUE	FALSE
cg17742293	chr5	14461138	14461139	FAM105A	54491	-120751	CGI	FALSE	TRUE	FALSE
cg17777432	chr5	172068999	172069000	NEURL1B	54492	722	CGI	FALSE	TRUE	FALSE
cg18063312	chr5	72740737	72740738	BTF3	689	-53511	CGI	FALSE	FALSE	TRUE
cg18096962	chr5	72526232	72526233	TMEM174	134288	57208	CGI	FALSE	FALSE	TRUE
cg18104919	chr5	7851396	7851397	C5orf49	134121	-131	CGI	TRUE	FALSE	FALSE
cg18136932	chr5	7851231	7851232	C5orf49	134121	31	CGI	TRUE	FALSE	FALSE
cg18275316	chr5	3607063	3607064	IRX1	79192	10894	CGI-S-Shore	FALSE	FALSE	TRUE
cg18344930	chr5	87441081	87441082	TMEM161B	153396	123582	CGI	FALSE	FALSE	TRUE
cg18430895	chr5	10485607	10485608	ROPN1L	83853	43632	Non-CGI	FALSE	FALSE	TRUE
cg19023977	chr5	95276578	95276579	ELL2	22936	21195	Non-CGI	FALSE	TRUE	FALSE
cg19419291	chr5	95295965	95295966	ELL2	22936	1808	CGI	FALSE	TRUE	FALSE
cg19640581	chr5	501343	501344	SLC9A3	6550	23204	CGI	FALSE	TRUE	FALSE
cg19664328	chr5	178854502	178854503	ADAMTS2	9509	-82070	CGI	FALSE	FALSE	TRUE
cg19800026	chr5	14492945	14492946	FAM105A	54491	-88944	CGI	FALSE	TRUE	FALSE
cg19923650	chr5	172659730	172659731	NKX2-5	1482	2583	CGI	FALSE	TRUE	FALSE
cg21046148	chr5	72731905	72731906	BTF3	689	-62343	CGI	FALSE	FALSE	TRUE
cg21609106	chr5	38259214	38259215	EGFLAM	133584	702	CGI	FALSE	TRUE	FALSE
cg21747070	chr5	957535	957536	LOC100506688	100506688	39918	CGI-S-Shore	FALSE	FALSE	TRUE
cg22183049	chr5	139143972	139143973	PSD2	84249	-31432	CGI	FALSE	FALSE	TRUE
cg22213386	chr5	156887005	156887006	NIPAL4	348938	-20	CGI-N-Shore	TRUE	TRUE	FALSE
cg22647996	chr5	141393674	141393675	GNPDA1	10007	-1053	CGI-S-Shore	TRUE	FALSE	FALSE
cg22657492	chr5	137593488	137593489	GFRA3	2676	16763	CGI	FALSE	TRUE	FALSE
cg23010507	chr5	1555887	1555888	LPCAT1	79888	-31810	CGI-S-Shelf	FALSE	FALSE	TRUE
cg23018092	chr5	126626364	126626365	MEGF10	84466	-90	CGI	TRUE	FALSE	FALSE
cg23189951	chr5	1595048	1595049	SDHAP3	728609	-401	CGI-S-Shore	TRUE	FALSE	FALSE
cg23468002	chr5	158532401	158532402	EBF1	1879	-5612	CGI	FALSE	TRUE	FALSE
cg23475112	chr5	131725325	131725326	LOC553103	553103	-19716	Non-CGI	FALSE	TRUE	FALSE
cg23960088	chr5	34006894	34006895	AMACR	23600	1324	CGI-N-Shore	FALSE	TRUE	FALSE
cg24756698	chr5	1020022	1020023	NKD2	85409	10853	CGI	FALSE	TRUE	FALSE
cg25023816	chr5	146859772	146859773	DPYSL3	1809	29845	Non-CGI	FALSE	TRUE	FALSE
cg25338204	chr5	175955105	175955106	RNF44	22838	9919	CGI-N-Shore	FALSE	TRUE	FALSE
cg25612428	chr5	10649867	10649868	ANKRD33B	651746	85431	CGI	FALSE	TRUE	FALSE
cg25640822	chr5	134871645	134871646	NEUROG1	4762	-5	CGI	TRUE	FALSE	FALSE
cg25645199	chr5	171533681	171533682	STK10	6793	81663	CGI	FALSE	TRUE	FALSE
cg26182487	chr5	148521226	148521227	ABLIM3	22885	171	CGI	TRUE	TRUE	FALSE
cg26305817	chr5	172656055	172656056	NKX2-5	1482	6258	CGI-S-Shore	FALSE	FALSE	TRUE
cg26371061	chr5	71014857	71014858	CARTPT	9607	-131	CGI-N-Shore	TRUE	FALSE	FALSE
cg26446499	chr5	77253555	77253556	TBCA	6902	-181369	CGI	FALSE	FALSE	TRUE
cg26552361	chr5	172293806	172293807	ERGIC1	57222	32582	Non-CGI	TRUE	TRUE	FALSE
cg26612409	chr5	160335	160336	PLEKHG4B	153478	19961	CGI-N-Shore	FALSE	TRUE	FALSE
cg26676468	chr5	112539223	112539224	DCP2	167227	226815	CGI	FALSE	TRUE	FALSE
cg27087956	chr5	122430153	122430154	PRDM6	93166	5311	CGI	FALSE	TRUE	FALSE
cg00117005	chr6	33288995	33288996	DAXX	1616	1796	CGI-S-Shore	FALSE	TRUE	FALSE
cg00142106	chr6	29760769	29760770	HCG4	54435	79	CGI	TRUE	TRUE	FALSE
cg00524781	chr6	160523923	160523924	LOC729603	729603	9808	CGI	FALSE	TRUE	FALSE
cg00932808	chr6	14211322	14211323	CD83	9308	93834	CGI	FALSE	FALSE	TRUE
cg01286685	chr6	30039025	30039026	PPP1R11	6992	4092	CGI	FALSE	TRUE	FALSE
cg01597685	chr6	11591981	11591982	TMEM170B	100113407	53469	Non-CGI	FALSE	FALSE	TRUE
cg01622006	chr6	170463397	170463398	LOC154449	154449	108258	CGI	FALSE	FALSE	TRUE
cg01740766	chr6	44528958	44528959	MIR4642	100616352	125579	CGI-S-Shore	FALSE	FALSE	TRUE
cg01882991	chr6	6677756	6677757	LY86-AS1	285780	-54696	Non-CGI	FALSE	FALSE	TRUE
cg02578560	chr6	43243245	43243246	SLC22A7	10864	-22751	CGI	FALSE	TRUE	FALSE
cg02666566	chr6	2510173	2510174	C6orf195	154386	125123	CGI-N-Shore	FALSE	FALSE	TRUE
cg02692313	chr6	33048444	33048445	HLA-DPA1	3113	109	CGI	TRUE	TRUE	FALSE
cg02693505	chr6	140371628	140371629	MIR3668	100500879	-154759	Non-CGI	FALSE	TRUE	FALSE
cg02925367	chr6	32116905	32116906	PRRT1	80863	3953	CGI	FALSE	TRUE	FALSE
cg02954307	chr6	7269328	7269329	SSR1	6745	44211	CGI	FALSE	FALSE	TRUE
cg03130962	chr6	31111088	31111089	PSORS1C2	170680	-3960	Non-CGI	FALSE	TRUE	FALSE
cg03236802	chr6	32055316	32055317	TNXB	7148	30153	CGI	FALSE	TRUE	FALSE
cg03293507	chr6	30038975	30038976	PPP1R11	6992	4042	CGI	FALSE	TRUE	FALSE
cg03353699	chr6	30644693	30644694	DHX16	8449	-3862	CGI-S-Shelf	FALSE	TRUE	FALSE
cg03431741	chr6	41528502	41528503	FOXP4	116113	14337	CGI	FALSE	TRUE	FALSE
cg03440125	chr6	83075080	83075081	TPBG	7162	2156	CGI	TRUE	TRUE	FALSE
cg03560996	chr6	31733908	31733909	VWA7	80737	11198	CGI	FALSE	TRUE	FALSE
cg03605610	chr6	41394765	41394766	NCR2	9436	91236	CGI	FALSE	FALSE	TRUE
cg03783555	chr6	31828001	31828002	NEU1	4758	2706	CGI-N-Shore	FALSE	TRUE	FALSE
cg03796735	chr6	32632643	32632644	HLA-DQB1	3119	1821	CGI	TRUE	TRUE	FALSE
cg03995122	chr6	29894642	29894643	HCG4B	80868	-1213	CGI	TRUE	TRUE	FALSE
cg04200224	chr6	25652390	25652391	SCGN	10590	-37	CGI-N-Shore	TRUE	FALSE	FALSE
cg04389484	chr6	32037916	32037917	CYP21A2	1589	31822	CGI	FALSE	TRUE	FALSE
cg04851089	chr6	28953923	28953924	ZNF311	282890	19168	CGI-S-Shelf	FALSE	FALSE	TRUE
cg05103992	chr6	159290440	159290441	OSTCP1	202459	-11775	CGI-N-Shore	FALSE	FALSE	TRUE
cg05233877	chr6	31599162	31599163	SNORA38	677820	8305	CGI-N-Shore	FALSE	TRUE	FALSE
cg05436760	chr6	32149143	32149144	AGER	177	2954	CGI-S-Shelf	FALSE	TRUE	FALSE
cg05437823	chr6	50813676	50813677	TFAP2B	7021	27236	CGI	FALSE	TRUE	FALSE
cg05526015	chr6	170553845	170553846	LOC154449	154449	17810	CGI	FALSE	FALSE	TRUE
cg05575213	chr6	1621807	1621808	FOXC1	2296	11125	CGI	FALSE	FALSE	TRUE
cg05575614	chr6	106434354	106434355	PRDM1	639	-99839	CGI	FALSE	FALSE	TRUE
cg05583848	chr6	35265411	35265412	DEF6	50619	-182	CGI-N-Shore	TRUE	FALSE	FALSE
cg05612654	chr6	2375895	2375896	GMDS	2762	-130026	Non-CGI	FALSE	FALSE	TRUE
cg05628366	chr6	35744188	35744189	CLPSL2	389383	-202	CGI-N-Shore	TRUE	FALSE	FALSE
cg05714552	chr6	32118295	32118296	PRRT1	80863	2563	CGI	TRUE	TRUE	FALSE
cg05956452	chr6	158018138	158018139	MIR3692	100500899	67973	CGI	FALSE	TRUE	FALSE
cg06150925	chr6	108582894	108582895	SNX3	8724	-429	CGI-S-Shore	TRUE	FALSE	FALSE
cg06255955	chr6	32632639	32632640	HLA-DQB1	3119	1825	CGI	TRUE	TRUE	FALSE
cg06473276	chr6	39399221	39399222	KCNK16	83795	-108890	Non-CGI	TRUE	TRUE	FALSE
cg06687504	chr6	167263454	167263455	RPS6KA2	6196	12315	CGI	FALSE	TRUE	FALSE
cg06759058	chr6	28602864	28602865	SCAND3	114821	-47751	CGI	TRUE	FALSE	FALSE
cg07098566	chr6	33288891	33288892	DAXX	1616	1900	CGI	FALSE	TRUE	FALSE
cg07187855	chr6	30854161	30854162	DDR1	780	3466	CGI-S-Shore	FALSE	TRUE	FALSE
cg07189222	chr6	32847527	32847528	LOC100294145	100294145	-14424	CGI	FALSE	FALSE	TRUE
cg07386228	chr6	30029490	30029491	ZNRD1-AS1	80862	-72	CGI-S-Shore	TRUE	TRUE	FALSE
cg07481320	chr6	42739021	42739022	GLTSCR1L	23506	-10767	Non-CGI	FALSE	FALSE	TRUE
cg07508341	chr6	2510507	2510508	C6orf195	154386	124789	CGI-N-Shore	FALSE	FALSE	TRUE
cg07515565	chr6	1624386	1624387	FOXC1	2296	13704	CGI	FALSE	TRUE	FALSE
cg07572131	chr6	31430791	31430792	HCP5	10866	-164	CGI-N-Shore	TRUE	FALSE	FALSE
cg07601536	chr6	7248983	7248984	SSR1	6745	64556	CGI	FALSE	TRUE	FALSE
cg07654762	chr6	32030226	32030227	CYP21A2	1589	24132	CGI-S-Shore	FALSE	TRUE	FALSE
cg07710266	chr6	134436740	134436741	HMGA1P7	387065	2076	CGI	FALSE	TRUE	FALSE
cg07995179	chr6	85484287	85484288	TBX18	9096	-10387	CGI	FALSE	FALSE	TRUE
cg08424749	chr6	32117292	32117293	PRRT1	80863	3566	CGI	FALSE	TRUE	FALSE
cg08521178	chr6	170491202	170491203	LOC154449	154449	80453	CGI	FALSE	FALSE	TRUE
cg08550353	chr6	134497627	134497628	HMGA1P7	387065	-58808	CGI	TRUE	TRUE	FALSE
cg08660959	chr6	32044163	32044164	CYP21A2	1589	38069	CGI-N-Shelf	FALSE	TRUE	FALSE
cg08801479	chr6	32165200	32165201	GPSM3	63940	-1899	CGI-S-Shore	TRUE	TRUE	FALSE
cg08886973	chr6	166402416	166402417	LINC00473	90632	-888	CGI	TRUE	FALSE	FALSE
cg09322259	chr6	106434131	106434132	PRDM1	639	-100062	CGI	FALSE	FALSE	TRUE
cg09506504	chr6	106439790	106439791	PRDM1	639	-94403	CGI-N-Shore	FALSE	FALSE	TRUE
cg09571972	chr6	2104322	2104323	GMDS	2762	141544	Non-CGI	FALSE	TRUE	FALSE
cg09879382	chr6	17581248	17581249	FAM8A1	51439	-19268	CGI	FALSE	FALSE	TRUE
cg09996288	chr6	32055517	32055518	TNXB	7148	29952	CGI	FALSE	TRUE	FALSE
cg10098058	chr6	1400797	1400798	FOXF2	2295	10727	CGI	FALSE	FALSE	TRUE
cg10365469	chr6	168417097	168417098	KIF25	3834	17324	CGI	TRUE	TRUE	FALSE
cg10812186	chr6	32055146	32055147	TNXB	7148	30323	CGI	FALSE	TRUE	FALSE
cg10863922	chr6	2892150	2892151	SERPINB9	5272	11393	CGI	TRUE	TRUE	FALSE
cg10975897	chr6	15504844	15504845	DTNBP1	84062	158443	CGI	FALSE	TRUE	FALSE
cg11248330	chr6	27247663	27247664	PRSS16	10279	32160	CGI	FALSE	FALSE	TRUE
cg11631592	chr6	148869535	148869536	UST	10090	-198734	Non-CGI	FALSE	TRUE	FALSE
cg11733430	chr6	33262740	33262741	RGL2	5863	4423	CGI-N-Shelf	FALSE	TRUE	FALSE
cg11928184	chr6	16218683	16218684	GMPR	2766	-20126	CGI	FALSE	FALSE	TRUE
cg11945824	chr6	32116963	32116964	PRRT1	80863	3895	CGI	FALSE	TRUE	FALSE
cg12312338	chr6	33145571	33145572	COL11A2	1302	14672	Non-CGI	FALSE	TRUE	FALSE
cg12477370	chr6	45391852	45391853	SUPT3H	8464	-46181	CGI	FALSE	TRUE	FALSE
cg12707343	chr6	168418439	168418440	KIF25	3834	18666	CGI-S-Shore	TRUE	TRUE	FALSE
cg13027183	chr6	15504872	15504873	DTNBP1	84062	158415	CGI	FALSE	TRUE	FALSE
cg13056744	chr6	29894940	29894941	HCG4B	80868	-1511	CGI	TRUE	TRUE	FALSE
cg13099117	chr6	30538539	30538540	ABCF1	23	-629	CGI-N-Shore	TRUE	FALSE	FALSE
cg13130352	chr6	29796494	29796495	HLA-H	3136	880	CGI	TRUE	TRUE	FALSE
cg13280041	chr6	138866865	138866866	NHSL1	57224	26801	Non-CGI	FALSE	TRUE	FALSE
cg13307058	chr6	134497542	134497543	HMGA1P7	387065	-58723	CGI	TRUE	TRUE	FALSE
cg13351249	chr6	166140706	166140707	PDE10A	10846	-65117	CGI	FALSE	FALSE	TRUE
cg13612207	chr6	41604752	41604753	MDFI	4188	-1441	CGI	TRUE	FALSE	FALSE
cg13918754	chr6	30039380	30039381	RNF39	80352	4246	CGI	FALSE	TRUE	FALSE
cg14022523	chr6	166756177	166756178	LOC100289495	100289495	57	CGI	TRUE	FALSE	FALSE
cg14086013	chr6	41604740	41604741	MDFI	4188	-1453	CGI	TRUE	FALSE	FALSE
cg14186641	chr6	88876741	88876742	CNR1	1268	-973	CGI	TRUE	FALSE	FALSE
cg14291549	chr6	135818752	135818753	AHI1	54806	149	CGI	TRUE	FALSE	FALSE
cg14868222	chr6	31548340	31548341	LTB	4050	1860	CGI-N-Shore	FALSE	TRUE	FALSE
cg14931854	chr6	42738967	42738968	GLTSCR1L	23506	-10821	Non-CGI	FALSE	FALSE	TRUE
cg14983586	chr6	27206503	27206504	PRSS16	10279	-8997	CGI	TRUE	FALSE	FALSE
cg15070677	chr6	33288804	33288805	DAXX	1616	1987	CGI	FALSE	TRUE	FALSE
cg15562220	chr6	25652395	25652396	SCGN	10590	-32	CGI-N-Shore	TRUE	FALSE	FALSE
cg15697476	chr6	32055474	32055475	TNXB	7148	29995	CGI	FALSE	TRUE	FALSE
cg15847400	chr6	110011599	110011600	AKD1	221264	814	CGI-N-Shore	TRUE	TRUE	FALSE
cg15931205	chr6	29894820	29894821	HCG4B	80868	-1391	CGI	TRUE	TRUE	FALSE
cg15967709	chr6	28584081	28584082	SCAND3	114821	-28968	CGI	FALSE	FALSE	TRUE
cg15977685	chr6	168743593	168743594	DACT2	168002	-23190	CGI-N-Shelf	FALSE	FALSE	TRUE
cg16478536	chr6	408730	408731	IRF4	3662	16990	Non-CGI	FALSE	TRUE	FALSE
cg16530177	chr6	6320324	6320325	F13A1	2162	598	CGI	FALSE	TRUE	FALSE
cg16834823	chr6	32064218	32064219	TNXB	7148	21251	CGI	FALSE	TRUE	FALSE
cg16938363	chr6	1614285	1614286	FOXC1	2296	3603	CGI	FALSE	FALSE	TRUE
cg16945312	chr6	1393028	1393029	FOXF2	2295	2958	CGI-S-Shore	FALSE	TRUE	FALSE
cg17001689	chr6	32055525	32055526	TNXB	7148	29944	CGI	FALSE	TRUE	FALSE
cg17017189	chr6	40722397	40722398	LRFN2	57497	-167270	CGI-N-Shore	FALSE	FALSE	TRUE
cg17040800	chr6	134274286	134274287	TBPL1	9519	977	CGI	TRUE	TRUE	FALSE
cg17076443	chr6	112115190	112115191	FYN	2534	79463	Non-CGI	TRUE	TRUE	FALSE
cg17160525	chr6	163756931	163756932	DKFZp451B082	401282	11132	Non-CGI	FALSE	FALSE	TRUE
cg17394649	chr6	29760164	29760165	HCG4	54435	684	CGI	TRUE	TRUE	FALSE
cg17507887	chr6	50786511	50786512	TFAP2B	7021	71	CGI-N-Shore	TRUE	FALSE	FALSE
cg17674042	chr6	34482479	34482480	SPDEF	25803	41629	Non-CGI	TRUE	TRUE	FALSE
cg17684207	chr6	163746145	163746146	PACRG-AS1	285796	-639	CGI-S-Shelf	TRUE	FALSE	FALSE
cg17947992	chr6	2510180	2510181	C6orf195	154386	125116	CGI-N-Shore	FALSE	FALSE	TRUE
cg17983632	chr6	1621930	1621931	FOXC1	2296	11248	CGI	FALSE	FALSE	TRUE
cg18032046	chr6	28092343	28092344	ZSCAN16	80345	-42	CGI	TRUE	TRUE	FALSE
cg18207141	chr6	30585871	30585872	MRPS18B	28973	384	CGI	TRUE	TRUE	FALSE
cg18243760	chr6	32116780	32116781	PRRT1	80863	4078	CGI	FALSE	TRUE	FALSE
cg18361418	chr6	28499676	28499677	GPX5	2880	5886	Non-CGI	FALSE	TRUE	FALSE
cg18466674	chr6	31783545	31783546	HSPA1L	3305	-43	CGI	TRUE	TRUE	FALSE
cg18740289	chr6	2437142	2437143	GMDS	2762	-191273	Non-CGI	FALSE	TRUE	FALSE
cg18749015	chr6	45631363	45631364	SUPT3H	8464	-285692	CGI	FALSE	FALSE	TRUE
cg18782604	chr6	100895050	100895051	SIM1	6492	17753	CGI	FALSE	TRUE	FALSE
cg18912728	chr6	45631106	45631107	SUPT3H	8464	-285435	CGI	FALSE	FALSE	TRUE
cg19758859	chr6	148869489	148869490	UST	10090	-198780	Non-CGI	FALSE	TRUE	FALSE
cg19807376	chr6	32055447	32055448	TNXB	7148	30022	CGI	FALSE	TRUE	FALSE
cg19850024	chr6	7315506	7315507	SSR1	6745	-1964	CGI	TRUE	FALSE	FALSE
cg20450471	chr6	28584061	28584062	SCAND3	114821	-28948	CGI	FALSE	FALSE	TRUE
cg20710635	chr6	108582940	108582941	SNX3	8724	-475	CGI-S-Shore	TRUE	FALSE	FALSE
cg20839206	chr6	28584121	28584122	SCAND3	114821	-29008	CGI	FALSE	FALSE	TRUE
cg20847580	chr6	41528750	41528751	FOXP4	116113	14585	CGI	FALSE	TRUE	FALSE
cg20849032	chr6	33289243	33289244	DAXX	1616	1548	CGI-S-Shore	FALSE	TRUE	FALSE
cg20871586	chr6	134175678	134175679	MGC34034	154089	33392	CGI	FALSE	TRUE	FALSE
cg21002542	chr6	168785632	168785633	SMOC2	64094	-56197	CGI	FALSE	FALSE	TRUE
cg21176130	chr6	30458158	30458159	HLA-E	3133	974	CGI	FALSE	TRUE	FALSE
cg21366688	chr6	134491421	134491422	HMGA1P7	387065	-52602	CGI	FALSE	TRUE	FALSE
cg21460606	chr6	32055402	32055403	TNXB	7148	30067	CGI	FALSE	TRUE	FALSE
cg21553283	chr6	36602452	36602453	MIR3925	100500885	-12162	Non-CGI	FALSE	FALSE	TRUE
cg21697252	chr6	32056709	32056710	TNXB	7148	28760	CGI-S-Shore	FALSE	TRUE	FALSE
cg21710066	chr6	474967	474968	IRF4	3662	83227	CGI-S-Shore	FALSE	FALSE	TRUE
cg21796935	chr6	170065938	170065939	WDR27	253769	36219	CGI	TRUE	TRUE	FALSE
cg22153312	chr6	45524346	45524347	SUPT3H	8464	-178675	Non-CGI	FALSE	FALSE	TRUE
cg22416916	chr6	160542770	160542771	SLC22A1	6580	-91	Non-CGI	TRUE	FALSE	FALSE
cg22507772	chr6	6759831	6759832	LY86-AS1	285780	-136771	CGI	FALSE	FALSE	TRUE
cg22897615	chr6	32117079	32117080	PRRT1	80863	3779	CGI	FALSE	TRUE	FALSE
cg22954978	chr6	151228677	151228678	MTHFD1L	25902	41861	Non-CGI	FALSE	TRUE	FALSE
cg22985172	chr6	151258337	151258338	MTHFD1L	25902	71521	CGI-N-Shore	FALSE	TRUE	FALSE
cg23115390	chr6	45784526	45784527	CLIC5	53405	263557	Non-CGI	FALSE	FALSE	TRUE
cg23201513	chr6	28754198	28754199	LOC401242	401242	77254	CGI-S-Shore	FALSE	FALSE	TRUE
cg23694520	chr6	30029482	30029483	ZNRD1-AS1	80862	-64	CGI	TRUE	TRUE	FALSE
cg23793213	chr6	30039006	30039007	PPP1R11	6992	4073	CGI	FALSE	TRUE	FALSE
cg23864398	chr6	166140257	166140258	PDE10A	10846	-64668	CGI	FALSE	FALSE	TRUE
cg24055029	chr6	32055137	32055138	TNXB	7148	30332	CGI	FALSE	TRUE	FALSE
cg24138857	chr6	32055079	32055080	TNXB	7148	30390	CGI-N-Shore	FALSE	TRUE	FALSE
cg24311272	chr6	56820869	56820870	BEND6	221336	1095	CGI	TRUE	TRUE	FALSE
cg24391982	chr6	169629902	169629903	THBS2	7058	24233	CGI	FALSE	TRUE	FALSE
cg24408769	chr6	15506085	15506086	DTNBP1	84062	157202	CGI	FALSE	TRUE	FALSE
cg24520538	chr6	42739049	42739050	GLTSCR1L	23506	-10739	Non-CGI	FALSE	FALSE	TRUE
cg24724428	chr6	11044888	11044889	ELOVL2	54898	-263	CGI	TRUE	TRUE	FALSE
cg24744430	chr6	146864390	146864391	RAB32	10981	-436	CGI	TRUE	FALSE	FALSE
cg24881607	chr6	126080513	126080514	HEY2	23493	11732	CGI	FALSE	TRUE	FALSE
cg25117941	chr6	100915102	100915103	SIM1	6492	-2296	CGI	FALSE	FALSE	TRUE
cg25362652	chr6	106429769	106429770	PRDM1	639	-104424	CGI	FALSE	FALSE	TRUE
cg25394782	chr6	168785355	168785356	SMOC2	64094	-56474	CGI-S-Shore	FALSE	FALSE	TRUE
cg25417675	chr6	31651059	31651060	LY6G5C	80741	756	CGI	FALSE	TRUE	FALSE
cg25472257	chr6	33163566	33163567	COL11A2	1302	-3320	CGI-S-Shelf	FALSE	TRUE	FALSE
cg25494480	chr6	45387917	45387918	SUPT3H	8464	-42246	CGI	TRUE	TRUE	FALSE
cg25580405	chr6	30431274	30431275	HLA-E	3133	-25907	CGI-N-Shore	FALSE	FALSE	TRUE
cg25753473	chr6	170532835	170532836	LOC154449	154449	38820	CGI	FALSE	FALSE	TRUE
cg25930662	chr6	168121243	168121244	C6orf123	26238	76294	CGI-S-Shore	FALSE	FALSE	TRUE
cg26358286	chr6	45387395	45387396	SUPT3H	8464	-41724	CGI	FALSE	TRUE	FALSE
cg26433444	chr6	36932349	36932350	PI16	221476	16309	CGI-S-Shelf	FALSE	TRUE	FALSE
cg26512045	chr6	31111158	31111159	PSORS1C2	170680	-4030	Non-CGI	FALSE	TRUE	FALSE
cg26715952	chr6	62996119	62996120	KHDRBS2	202559	-18	CGI	TRUE	FALSE	FALSE
cg26849331	chr6	32116216	32116217	PRRT1	80863	4642	CGI	FALSE	TRUE	FALSE
cg26997880	chr6	32055370	32055371	TNXB	7148	30099	CGI	FALSE	TRUE	FALSE
cg27051937	chr6	33419580	33419581	ZBTB9	221504	-2774	CGI-N-Shelf	FALSE	TRUE	FALSE
cg27168291	chr6	33282997	33282998	TAPBP	6892	-832	CGI	TRUE	TRUE	FALSE
cg27475365	chr6	125476259	125476260	TPD52L1	7164	1379	CGI-S-Shore	FALSE	TRUE	FALSE
cg00031973	chr7	47783848	47783849	LINC00525	84847	-17224	CGI-S-Shore	FALSE	FALSE	TRUE
cg00254079	chr7	115850376	115850377	TES	26136	-169	CGI-N-Shore	TRUE	FALSE	FALSE
cg00373376	chr7	2130669	2130670	MAD1L1	8379	141912	CGI-S-Shore	FALSE	TRUE	FALSE
cg00852398	chr7	154862969	154862970	LOC100128264	100128264	296	CGI	TRUE	FALSE	FALSE
cg01275887	chr7	4747216	4747217	FOXK1	221937	63827	CGI	FALSE	TRUE	FALSE
cg01301117	chr7	1953969	1953970	MIR4655	100616160	-70079	CGI-S-Shore	FALSE	TRUE	FALSE
cg01357429	chr7	27285563	27285564	EVX1	2128	3398	CGI	FALSE	TRUE	FALSE
cg01462184	chr7	640820	640821	FLJ44511	441307	80791	CGI	FALSE	TRUE	FALSE
cg01574912	chr7	585154	585155	FLJ44511	441307	25125	CGI-N-Shore	FALSE	FALSE	TRUE
cg01580340	chr7	16891079	16891080	AGR3	155465	30532	CGI	FALSE	FALSE	TRUE
cg01593358	chr7	1154959	1154960	C7orf50	84310	22932	CGI-S-Shore	FALSE	TRUE	FALSE
cg01680010	chr7	96647117	96647118	DLX6-AS1	285987	-3739	CGI	FALSE	FALSE	TRUE
cg01687558	chr7	5647786	5647787	FSCN1	6624	15349	CGI	FALSE	FALSE	TRUE
cg01759597	chr7	96626788	96626789	DLX6	1750	-8500	CGI	FALSE	TRUE	FALSE
cg01860743	chr7	1435122	1435123	MICALL2	79778	63985	Non-CGI	FALSE	FALSE	TRUE
cg01888566	chr7	130126513	130126514	MEST	4232	496	CGI	FALSE	TRUE	FALSE
cg02229607	chr7	2759813	2759814	AMZ1	155185	40649	CGI-S-Shore	FALSE	FALSE	TRUE
cg02376703	chr7	143106130	143106131	EPHA1	2041	-144	CGI-S-Shore	TRUE	TRUE	FALSE
cg02885694	chr7	100807168	100807169	VGF	7425	1682	CGI	TRUE	TRUE	FALSE
cg02898094	chr7	96634914	96634915	DLX6	1750	-374	CGI	TRUE	TRUE	FALSE
cg02951883	chr7	2050386	2050387	MIR4655	100616160	-166496	CGI	FALSE	TRUE	FALSE
cg03113878	chr7	100091364	100091365	NYAP1	222950	9813	CGI	FALSE	TRUE	FALSE
cg03120555	chr7	630473	630474	FLJ44511	441307	70444	CGI-N-Shore	FALSE	TRUE	FALSE
cg03219611	chr7	129988837	129988838	CPA5	93979	4206	Non-CGI	FALSE	TRUE	FALSE
cg03313542	chr7	129845597	129845598	TMEM209	84928	-258	CGI-S-Shore	TRUE	FALSE	FALSE
cg03510186	chr7	155580742	155580743	SHH	6469	24223	CGI	FALSE	FALSE	TRUE
cg03906434	chr7	27231819	27231820	HOXA11-AS	221883	6791	CGI	FALSE	FALSE	TRUE
cg03907570	chr7	731254	731255	HEATR2	54919	-35082	CGI	FALSE	TRUE	FALSE
cg03975188	chr7	148131599	148131600	C7orf33	202865	-156056	Non-CGI	FALSE	FALSE	TRUE
cg04037970	chr7	54955965	54955966	SEC61G	23480	-129025	CGI-N-Shore	FALSE	FALSE	TRUE
cg04038179	chr7	127806902	127806903	MIR129-1	406917	-41021	CGI	FALSE	FALSE	TRUE
cg04102854	chr7	130005852	130005853	CPA1	1357	-14436	Non-CGI	FALSE	TRUE	FALSE
cg04191989	chr7	630914	630915	FLJ44511	441307	70885	CGI	FALSE	TRUE	FALSE
cg04599026	chr7	96634763	96634764	DLX6	1750	-525	CGI	TRUE	TRUE	FALSE
cg04696780	chr7	116139425	116139426	MET	4233	-173032	CGI	TRUE	TRUE	FALSE
cg04795774	chr7	150901733	150901734	ASB10	136371	-16813	CGI	FALSE	FALSE	TRUE
cg05143694	chr7	132299913	132299914	PLXNA4	91584	33532	CGI	FALSE	TRUE	FALSE
cg05285902	chr7	21582834	21582835	DNAH11	8701	0	CGI	TRUE	FALSE	FALSE
cg05339390	chr7	12726307	12726308	ARL4A	10124	-143	CGI	TRUE	FALSE	FALSE
cg05848863	chr7	16794078	16794079	TSPAN13	27075	726	CGI	FALSE	TRUE	FALSE
cg06139908	chr7	54614620	54614621	VSTM2A	222008	4600	CGI	FALSE	TRUE	FALSE
cg06145435	chr7	1022769	1022770	CYP2W1	54905	-64	CGI-N-Shore	TRUE	FALSE	FALSE
cg06195987	chr7	98100169	98100170	BAIAP2L1	55971	-69741	CGI	FALSE	FALSE	TRUE
cg06436185	chr7	151442351	151442352	PRKAG2-AS1	100505483	-131774	CGI	FALSE	TRUE	FALSE
cg06471596	chr7	101579936	101579937	CUX1	1523	120751	Non-CGI	FALSE	TRUE	FALSE
cg06496454	chr7	4807062	4807063	AP5Z1	9907	-8198	CGI	FALSE	TRUE	FALSE
cg06550177	chr7	5469535	5469536	TNRC18	84629	-4489	CGI	FALSE	FALSE	TRUE
cg06618764	chr7	2719090	2719091	AMZ1	155185	-71	CGI	TRUE	FALSE	FALSE
cg07039423	chr7	128531106	128531107	KCP	375616	19665	CGI	FALSE	TRUE	FALSE
cg07070039	chr7	6576529	6576530	GRID2IP	392862	14536	CGI-S-Shore	FALSE	TRUE	FALSE
cg07144666	chr7	6501749	6501750	KDELR2	11014	22098	Non-CGI	FALSE	TRUE	FALSE
cg07351675	chr7	1578263	1578264	MAFK	7975	7894	CGI	FALSE	TRUE	FALSE
cg07367144	chr7	151833529	151833530	GALNT11	63917	110750	Non-CGI	FALSE	TRUE	FALSE
cg07542748	chr7	4885643	4885644	PAPOLB	56903	15980	CGI	FALSE	TRUE	FALSE
cg07788369	chr7	96619068	96619069	DLX6	1750	-16220	CGI	FALSE	TRUE	FALSE
cg07993468	chr7	73389632	73389633	ELN	2006	-52793	CGI-N-Shelf	FALSE	FALSE	TRUE
cg08101303	chr7	96652222	96652223	DLX5	1749	1919	CGI	FALSE	TRUE	FALSE
cg08310360	chr7	1499057	1499058	MICALL2	79778	50	CGI	TRUE	FALSE	FALSE
cg08368520	chr7	4747026	4747027	FOXK1	221937	63637	CGI	FALSE	TRUE	FALSE
cg08474521	chr7	1315866	1315867	UNCX	340260	43211	CGI	FALSE	FALSE	TRUE
cg08545129	chr7	117854304	117854305	ANKRD7	56311	-10406	CGI	FALSE	FALSE	TRUE
cg08703857	chr7	2653651	2653652	TTYH3	80727	-17950	CGI	FALSE	TRUE	FALSE
cg08832603	chr7	96652481	96652482	DLX5	1749	1660	CGI-S-Shore	FALSE	TRUE	FALSE
cg08832624	chr7	98099917	98099918	BAIAP2L1	55971	-69489	CGI-N-Shore	FALSE	FALSE	TRUE
cg09516959	chr7	30721478	30721479	INMT	11185	-16121	CGI	FALSE	TRUE	FALSE
cg09937438	chr7	1095005	1095006	GPR146	115330	-2134	CGI	TRUE	TRUE	FALSE
cg10052687	chr7	73787374	73787375	GTF2IRD1	9569	-80744	CGI	FALSE	TRUE	FALSE
cg10092878	chr7	73038859	73038860	MLXIPL	51085	9	CGI	TRUE	FALSE	FALSE
cg10228500	chr7	143105595	143105596	EPHA1	2041	388	CGI-N-Shore	FALSE	TRUE	FALSE
cg10350880	chr7	100423220	100423221	EPHB4	2050	1921	CGI-S-Shore	TRUE	TRUE	FALSE
cg10364115	chr7	2560976	2560977	MIR4648	100616116	-5730	CGI-S-Shore	FALSE	TRUE	FALSE
cg10485664	chr7	121946036	121946037	FEZF1	389549	-1470	CGI	TRUE	TRUE	FALSE
cg10611760	chr7	100491714	100491715	ACHE	43	2823	CGI	TRUE	TRUE	FALSE
cg10659805	chr7	96631680	96631681	DLX6	1750	-3608	CGI	FALSE	TRUE	FALSE
cg10688297	chr7	2606824	2606825	IQCE	23288	8191	CGI	FALSE	TRUE	FALSE
cg11033688	chr7	1902804	1902805	MIR4655	100616160	-18914	CGI-N-Shore	FALSE	TRUE	FALSE
cg11196182	chr7	1989412	1989413	MIR4655	100616160	-105522	CGI	FALSE	TRUE	FALSE
cg11367354	chr7	96651983	96651984	DLX5	1749	2158	CGI	FALSE	TRUE	FALSE
cg11524642	chr7	1191861	1191862	ZFAND2A	90637	7992	CGI	FALSE	FALSE	TRUE
cg11642382	chr7	145813066	145813067	CNTNAP2	26047	-385	CGI	TRUE	FALSE	FALSE
cg11647481	chr7	4781704	4781705	AP5Z1	9907	-33556	CGI	FALSE	TRUE	FALSE
cg12017558	chr7	2289097	2289098	NUDT1	4521	7239	CGI-S-Shore	FALSE	TRUE	FALSE
cg12345672	chr7	127672658	127672659	LRRC4	64101	-1655	CGI	TRUE	TRUE	FALSE
cg12355813	chr7	107790375	107790376	LAMB4	22798	-19573	Non-CGI	FALSE	TRUE	FALSE
cg12404837	chr7	2130633	2130634	MAD1L1	8379	141948	CGI-S-Shore	FALSE	TRUE	FALSE
cg12510512	chr7	1717187	1717188	ELFN1	392617	-31609	CGI	FALSE	FALSE	TRUE
cg12548057	chr7	73389660	73389661	ELN	2006	-52765	CGI-N-Shelf	FALSE	FALSE	TRUE
cg12575883	chr7	1003710	1003711	ADAP1	11033	11523	CGI	FALSE	TRUE	FALSE
cg12739419	chr7	116140593	116140594	MET	4233	-171864	CGI-S-Shore	FALSE	TRUE	FALSE
cg12967164	chr7	1753637	1753638	ELFN1	392617	4838	Non-CGI	FALSE	TRUE	FALSE
cg12973591	chr7	93519473	93519474	TFPI2	7980	590	CGI	FALSE	TRUE	FALSE
cg13065683	chr7	39760443	39760444	LINC00265	349114	-12722	Non-CGI	FALSE	FALSE	TRUE
cg13151425	chr7	2561116	2561117	MIR4648	100616116	-5590	CGI	FALSE	TRUE	FALSE
cg13323756	chr7	29847108	29847109	WIPF3	644150	937	CGI	FALSE	TRUE	FALSE
cg13581527	chr7	1708566	1708567	ELFN1	392617	-40230	CGI-S-Shore	FALSE	FALSE	TRUE
cg13720395	chr7	75957902	75957903	HSPB1	3315	26026	CGI	FALSE	TRUE	FALSE
cg13888471	chr7	101207836	101207837	MYL10	93408	64738	CGI	FALSE	FALSE	TRUE
cg14085527	chr7	1068230	1068231	MIR339	442907	-5567	CGI	TRUE	TRUE	FALSE
cg14148253	chr7	1015460	1015461	ADAP1	11033	-224	CGI	TRUE	FALSE	FALSE
cg14203426	chr7	101723947	101723948	SH2B2	10603	-204456	CGI	FALSE	TRUE	FALSE
cg14260083	chr7	4876858	4876859	PAPOLB	56903	24765	CGI-S-Shore	FALSE	TRUE	FALSE
cg14391382	chr7	866102	866103	SUN1	23353	10907	CGI	FALSE	TRUE	FALSE
cg15388107	chr7	36700916	36700917	AOAH	313	63236	Non-CGI	FALSE	TRUE	FALSE
cg15564098	chr7	27281346	27281347	EVX1	2128	-816	CGI-S-Shore	TRUE	FALSE	FALSE
cg15755348	chr7	101768874	101768875	SH2B2	10603	-159529	Non-CGI	FALSE	TRUE	FALSE
cg15770446	chr7	101754758	101754759	SH2B2	10603	-173645	CGI-N-Shore	FALSE	TRUE	FALSE
cg15997393	chr7	1961869	1961870	MIR4655	100616160	-77979	CGI	FALSE	TRUE	FALSE
cg16061381	chr7	112430531	112430532	TMEM168	64418	-52	CGI	TRUE	FALSE	FALSE
cg16107907	chr7	102921442	102921443	DPY19L2P2	349152	-528	CGI	TRUE	FALSE	FALSE
cg16379337	chr7	115850450	115850451	TES	26136	-95	CGI-N-Shore	TRUE	FALSE	FALSE
cg16581738	chr7	705693	705694	HEATR2	54919	-60643	CGI	FALSE	TRUE	FALSE
cg16603578	chr7	51081446	51081447	GRB10	2887	-220286	Non-CGI	FALSE	FALSE	TRUE
cg16882450	chr7	127260350	127260351	PAX4	5078	-4367	CGI	FALSE	FALSE	TRUE
cg16911981	chr7	70061135	70061136	WBSCR17	64409	-536652	CGI-S-Shore	FALSE	TRUE	FALSE
cg16961816	chr7	96633530	96633531	DLX6	1750	-1758	CGI	TRUE	TRUE	FALSE
cg17150306	chr7	855575	855576	SUN1	23353	380	CGI	TRUE	TRUE	FALSE
cg17152484	chr7	124405757	124405758	GPR37	2861	-75	CGI	TRUE	FALSE	FALSE
cg17177213	chr7	126987682	126987683	ZNF800	168850	45083	CGI-N-Shore	FALSE	FALSE	TRUE
cg17467898	chr7	2289054	2289055	NUDT1	4521	7196	CGI-S-Shore	FALSE	TRUE	FALSE
cg17473795	chr7	139992610	139992611	SLC37A3	84255	105699	CGI	FALSE	FALSE	TRUE
cg17570276	chr7	6099250	6099251	EIF2AK1	27102	-389	CGI-S-Shore	TRUE	FALSE	FALSE
cg17713751	chr7	101723568	101723569	SH2B2	10603	-204835	CGI	FALSE	TRUE	FALSE
cg17881200	chr7	27138850	27138851	HOTAIRM1	100506311	3136	CGI	FALSE	TRUE	FALSE
cg18023771	chr7	24874132	24874133	DFNA5	1687	-76492	CGI-N-Shore	FALSE	TRUE	FALSE
cg18090197	chr7	99769602	99769603	GAL3ST4	79690	-3228	CGI-S-Shore	FALSE	TRUE	FALSE
cg18129805	chr7	1325993	1325994	UNCX	340260	53338	CGI	FALSE	FALSE	TRUE
cg18404925	chr7	6413861	6413862	RAC1	5879	-263	CGI-N-Shore	TRUE	FALSE	FALSE
cg18450582	chr7	95546539	95546540	DYNC1I1	1780	144720	CGI	FALSE	TRUE	FALSE
cg18502142	chr7	96622709	96622710	DLX6	1750	-12579	CGI	FALSE	TRUE	FALSE
cg18547659	chr7	75830863	75830864	SRRM3	222183	-351	CGI-N-Shore	TRUE	FALSE	FALSE
cg18790057	chr7	204337	204338	FAM20C	56975	11367	CGI	FALSE	TRUE	FALSE
cg18857889	chr7	23719661	23719662	FAM221A	340277	-86	CGI	TRUE	FALSE	FALSE
cg19033943	chr7	1140782	1140783	GPER	2852	18937	CGI	FALSE	TRUE	FALSE
cg19104757	chr7	226563	226564	FAM20C	56975	33593	CGI	FALSE	TRUE	FALSE
cg19131736	chr7	1902888	1902889	MIR4655	100616160	-18998	CGI	FALSE	TRUE	FALSE
cg19313311	chr7	74058031	74058032	GTF2I	2969	-13997	Non-CGI	FALSE	FALSE	TRUE
cg19480724	chr7	27285831	27285832	EVX1	2128	3666	CGI	FALSE	TRUE	FALSE
cg19588408	chr7	28848902	28848903	LOC100506497	100506497	-170679	Non-CGI	FALSE	TRUE	FALSE
cg20151476	chr7	1607408	1607409	PSMG3	84262	2258	CGI	FALSE	TRUE	FALSE
cg20161965	chr7	27171401	27171402	HOXA4	3201	-1001	CGI-S-Shore	TRUE	FALSE	FALSE
cg20304727	chr7	98255916	98255917	NPTX2	4885	9318	CGI-S-Shore	FALSE	TRUE	FALSE
cg20370909	chr7	4859229	4859230	MIR4656	100616465	-30958	CGI	FALSE	TRUE	FALSE
cg20670679	chr7	157561786	157561787	LOC100506585	100506585	-85489	CGI	FALSE	TRUE	FALSE
cg21008208	chr7	151454717	151454718	PRKAG2-AS1	100505483	-119408	CGI-S-Shore	FALSE	TRUE	FALSE
cg21451816	chr7	1468848	1468849	MICALL2	79778	30259	CGI-S-Shore	FALSE	FALSE	TRUE
cg21577472	chr7	2561029	2561030	MIR4648	100616116	-5677	CGI	FALSE	TRUE	FALSE
cg22086566	chr7	3989097	3989098	SDK1	221935	648016	CGI	FALSE	TRUE	FALSE
cg22100274	chr7	596062	596063	FLJ44511	441307	36033	CGI	FALSE	TRUE	FALSE
cg22500518	chr7	1585359	1585360	TMEM184A	202915	10705	CGI-S-Shore	FALSE	TRUE	FALSE
cg22676516	chr7	157808983	157808984	LOC100506585	100506585	161705	CGI	FALSE	TRUE	FALSE
cg22785556	chr7	1081061	1081062	GPR146	115330	-16078	CGI	FALSE	TRUE	FALSE
cg22964918	chr7	27286075	27286076	EVX1	2128	3910	CGI	FALSE	TRUE	FALSE
cg23050437	chr7	45197609	45197610	RAMP3	10268	241	CGI	FALSE	TRUE	FALSE
cg23214628	chr7	75989305	75989306	YWHAG	7532	-962	CGI-S-Shore	TRUE	FALSE	FALSE
cg23509665	chr7	158293697	158293698	MIR595	693180	31806	CGI	FALSE	TRUE	FALSE
cg23693738	chr7	1426361	1426362	MICALL2	79778	72746	CGI	FALSE	FALSE	TRUE
cg23714773	chr7	808081	808082	PRKAR1B	5575	-40767	CGI	TRUE	TRUE	FALSE
cg23742152	chr7	50849805	50849806	GRB10	2887	11352	CGI	FALSE	TRUE	FALSE
cg23752752	chr7	4778908	4778909	AP5Z1	9907	-36352	CGI	FALSE	TRUE	FALSE
cg23754918	chr7	2653733	2653734	TTYH3	80727	-17868	CGI	FALSE	TRUE	FALSE
cg23807071	chr7	1980222	1980223	MIR4655	100616160	-96332	CGI	TRUE	TRUE	FALSE
cg23843484	chr7	1560248	1560249	MAFK	7975	-10118	CGI-N-Shore	FALSE	FALSE	TRUE
cg24227481	chr7	73417185	73417186	ELN	2006	-25240	Non-CGI	FALSE	FALSE	TRUE
cg24525457	chr7	100091255	100091256	NYAP1	222950	9704	CGI	FALSE	TRUE	FALSE
cg24599249	chr7	90895027	90895028	FZD1	8321	1243	CGI	TRUE	FALSE	FALSE
cg25346720	chr7	73184981	73184982	CLDN3	1365	-380	CGI	TRUE	FALSE	FALSE
cg25430192	chr7	96643508	96643509	DLX6-AS1	285987	-130	CGI-S-Shore	TRUE	FALSE	FALSE
cg25454298	chr7	150815445	150815446	AGAP3	116988	32490	CGI	FALSE	TRUE	FALSE
cg25495650	chr7	633202	633203	FLJ44511	441307	73173	CGI	FALSE	TRUE	FALSE
cg25588389	chr7	2654420	2654421	TTYH3	80727	-17181	CGI	FALSE	FALSE	TRUE
cg25598840	chr7	27142618	27142619	HOXA2	3199	-223	CGI	TRUE	FALSE	FALSE
cg25783361	chr7	47783949	47783950	LINC00525	84847	-17123	CGI-S-Shore	FALSE	FALSE	TRUE
cg25797887	chr7	96627821	96627822	DLX6	1750	-7467	CGI-S-Shore	FALSE	TRUE	FALSE
cg25985355	chr7	65971099	65971100	LOC493754	493754	86270	CGI	FALSE	FALSE	TRUE
cg26105076	chr7	63561037	63561038	ZNF727	442319	55215	CGI	FALSE	FALSE	TRUE
cg26771315	chr7	139200259	139200260	CLEC2L	154790	-8413	Non-CGI	FALSE	FALSE	TRUE
cg26792755	chr7	140714919	140714920	MRPS33	51650	-137	CGI	TRUE	FALSE	FALSE
cg26830108	chr7	100813299	100813300	VGF	7425	-4446	CGI	FALSE	FALSE	TRUE
cg27032146	chr7	96652115	96652116	DLX5	1749	2026	CGI	FALSE	TRUE	FALSE
cg27092935	chr7	100744067	100744068	TRIM56	81844	15280	CGI-S-Shore	FALSE	FALSE	TRUE
cg27134084	chr7	129793154	129793155	TMEM209	84928	52182	CGI	FALSE	FALSE	TRUE
cg27180315	chr7	75831194	75831195	SRRM3	222183	-20	CGI	TRUE	FALSE	FALSE
cg27493411	chr7	101555711	101555712	CUX1	1523	96526	CGI-N-Shore	FALSE	TRUE	FALSE
cg27527630	chr7	29923538	29923539	WIPF3	644150	77367	CGI	FALSE	TRUE	FALSE
cg00219816	chr8	96280555	96280556	LOC100616530	100616530	-507	CGI-N-Shore	TRUE	TRUE	FALSE
cg00394718	chr8	120684921	120684922	ENPP2	5168	-33814	CGI	FALSE	FALSE	TRUE
cg00566369	chr8	144935784	144935785	NRBP2	340371	-11583	Non-CGI	FALSE	FALSE	TRUE
cg00829961	chr8	25909326	25909327	EBF2	64641	-6685	CGI	FALSE	TRUE	FALSE
cg01592801	chr8	99438942	99438943	KCNS2	3788	-306	CGI	TRUE	FALSE	FALSE
cg01923999	chr8	127568677	127568678	FAM84B	157638	2032	CGI-N-Shore	FALSE	TRUE	FALSE
cg02000426	chr8	1759815	1759816	MIR596	693181	-5580	CGI	FALSE	FALSE	TRUE
cg02298862	chr8	77596076	77596077	ZFHX4-AS1	100192378	-565	CGI-S-Shore	TRUE	TRUE	FALSE
cg02346342	chr8	74332435	74332436	STAU2-AS1	100128126	125	CGI	TRUE	FALSE	FALSE
cg02377900	chr8	41478738	41478739	MIR486	619554	39286	CGI	FALSE	TRUE	FALSE
cg02471153	chr8	99440331	99440332	KCNS2	3788	1080	CGI	TRUE	TRUE	FALSE
cg02694884	chr8	99411691	99411692	KCNS2	3788	-27557	Non-CGI	FALSE	FALSE	TRUE
cg03301200	chr8	99954557	99954558	STK3	6788	314	CGI	FALSE	TRUE	FALSE
cg03615269	chr8	116679830	116679831	TRPS1	7227	1396	CGI	FALSE	TRUE	FALSE
cg03631656	chr8	6420770	6420771	ANGPT2	285	12	CGI-S-Shore	TRUE	TRUE	FALSE
cg03726963	chr8	1808475	1808476	ARHGEF10	9639	36325	CGI	FALSE	TRUE	FALSE
cg04286438	chr8	144898672	144898673	SCRIB	23513	-1122	CGI	TRUE	TRUE	FALSE
cg05690644	chr8	97158015	97158016	GDF6	392255	15003	CGI	FALSE	TRUE	FALSE
cg05985821	chr8	328586	328587	FBXO25	26260	-28220	CGI	FALSE	FALSE	TRUE
cg06368590	chr8	116679763	116679764	TRPS1	7227	1463	CGI	FALSE	TRUE	FALSE
cg06763054	chr8	17270834	17270835	MTMR7	9108	204	CGI	TRUE	FALSE	FALSE
cg07011778	chr8	144105570	144105571	LY6E	4061	5667	CGI-S-Shore	FALSE	FALSE	TRUE
cg07223952	chr8	120684721	120684722	ENPP2	5168	-33614	CGI	FALSE	FALSE	TRUE
cg07532183	chr8	120684968	120684969	ENPP2	5168	-33861	CGI	FALSE	FALSE	TRUE
cg07651720	chr8	120685129	120685130	ENPP2	5168	-34022	CGI	FALSE	FALSE	TRUE
cg08194989	chr8	41655154	41655155	NKX6-3	157848	-11768	CGI	TRUE	TRUE	FALSE
cg08455275	chr8	145047979	145047980	PLEC	5339	2932	CGI	TRUE	TRUE	FALSE
cg08823244	chr8	686919	686920	ERICH1	157697	-5692	CGI	TRUE	FALSE	FALSE
cg08827060	chr8	102121621	102121622	FLJ42969	441374	57338	CGI	FALSE	FALSE	TRUE
cg08919494	chr8	61194111	61194112	CA8	767	-156	CGI	TRUE	FALSE	FALSE
cg09129067	chr8	103750904	103750905	KLF10	7071	-82920	CGI-N-Shore	FALSE	FALSE	TRUE
cg09210336	chr8	141034016	141034017	KCNK9	51305	-318716	CGI	FALSE	TRUE	FALSE
cg09559189	chr8	25898412	25898413	EBF2	64641	4226	CGI	FALSE	TRUE	FALSE
cg09578937	chr8	1896437	1896438	KBTBD11	9920	-25605	CGI	FALSE	TRUE	FALSE
cg10225865	chr8	54605566	54605567	ATP6V1H	51606	150282	CGI	FALSE	FALSE	TRUE
cg10715223	chr8	101661788	101661789	SNX31	169166	103	CGI	TRUE	FALSE	FALSE
cg10764196	chr8	10489270	10489271	RP1L1	94137	23345	CGI	FALSE	TRUE	FALSE
cg11125037	chr8	145104669	145104670	OPLAH	26873	10913	CGI	FALSE	FALSE	TRUE
cg11377730	chr8	17270604	17270605	MTMR7	9108	434	CGI	FALSE	TRUE	FALSE
cg11589287	chr8	1905343	1905344	KBTBD11	9920	-16699	CGI	FALSE	TRUE	FALSE
cg11774624	chr8	41480639	41480640	MIR486	619554	37385	CGI-S-Shore	FALSE	TRUE	FALSE
cg11783834	chr8	27469331	27469332	CLU	1191	2995	CGI-N-Shelf	TRUE	TRUE	FALSE
cg11878331	chr8	72469507	72469508	EYA1	2138	-195039	CGI	FALSE	FALSE	TRUE
cg12028740	chr8	3244626	3244627	MYOM2	9172	1251467	CGI-N-Shore	FALSE	TRUE	FALSE
cg12296772	chr8	17271067	17271068	MTMR7	9108	-26	CGI	TRUE	FALSE	FALSE
cg12396523	chr8	116680127	116680128	TRPS1	7227	1099	CGI	TRUE	TRUE	FALSE
cg12615766	chr8	59058273	59058274	FAM110B	90362	151159	CGI	TRUE	TRUE	FALSE
cg13093774	chr8	22089400	22089401	PHYHIP	9796	449	CGI-N-Shore	TRUE	FALSE	FALSE
cg13247663	chr8	59058254	59058255	FAM110B	90362	151140	CGI	TRUE	TRUE	FALSE
cg13462219	chr8	144649510	144649511	MROH6	642475	5416	CGI	FALSE	TRUE	FALSE
cg14326671	chr8	77585318	77585319	ZFHX4	79776	-8195	CGI	FALSE	TRUE	FALSE
cg14439572	chr8	102121398	102121399	FLJ42969	441374	57115	CGI	FALSE	FALSE	TRUE
cg14486338	chr8	99440279	99440280	KCNS2	3788	1028	CGI	TRUE	TRUE	FALSE
cg14499577	chr8	1414612	1414613	DLGAP2	9228	-34955	CGI-S-Shore	FALSE	FALSE	TRUE
cg14546712	chr8	41478669	41478670	MIR486	619554	39355	CGI	FALSE	TRUE	FALSE
cg14637067	chr8	10874215	10874216	MIR598	693183	18595	CGI	FALSE	TRUE	FALSE
cg14712794	chr8	25909299	25909300	EBF2	64641	-6658	CGI	FALSE	TRUE	FALSE
cg14743352	chr8	145734503	145734504	MFSD3	113655	-47	CGI	TRUE	FALSE	FALSE
cg14855519	chr8	25898191	25898192	EBF2	64641	4447	CGI	FALSE	TRUE	FALSE
cg14918359	chr8	134368479	134368480	NDRG1	10397	-58931	Non-CGI	FALSE	FALSE	TRUE
cg16011496	chr8	63057206	63057207	NKAIN3	286183	-104293	CGI	FALSE	FALSE	TRUE
cg16310415	chr8	25898539	25898540	EBF2	64641	4099	CGI-S-Shore	FALSE	TRUE	FALSE
cg16482314	chr8	77596069	77596070	ZFHX4-AS1	100192378	-558	CGI-S-Shore	TRUE	TRUE	FALSE
cg16663570	chr8	22014724	22014725	LGI3	203190	-379	CGI	TRUE	FALSE	FALSE
cg16847396	chr8	10489236	10489237	RP1L1	94137	23379	CGI	FALSE	TRUE	FALSE
cg17704026	chr8	145807555	145807556	C8orf82	414919	-53096	CGI	FALSE	TRUE	FALSE
cg17820365	chr8	97157856	97157857	GDF6	392255	15162	CGI	FALSE	TRUE	FALSE
cg18239431	chr8	25898220	25898221	EBF2	64641	4418	CGI	FALSE	TRUE	FALSE
cg18249580	chr8	65281496	65281497	LOC100130155	100130155	-4277	CGI-N-Shore	FALSE	FALSE	TRUE
cg18898125	chr8	24770381	24770382	NEFM	4741	-891	CGI-N-Shore	TRUE	FALSE	FALSE
cg19185544	chr8	22595422	22595423	EGR3	1960	-44606	CGI	FALSE	TRUE	FALSE
cg19889626	chr8	26047996	26047997	EBF2	64641	-145355	CGI	FALSE	TRUE	FALSE
cg20207219	chr8	69242509	69242510	C8orf34	116328	-446	CGI-N-Shore	TRUE	TRUE	FALSE
cg20636351	chr8	55087400	55087401	MRPL15	29088	39618	CGI	FALSE	FALSE	TRUE
cg20995030	chr8	143214333	143214334	MIR4472-1	100616268	-43365	CGI-N-Shore	FALSE	FALSE	TRUE
cg22231908	chr8	144815907	144815908	FAM83H	286077	5	CGI	TRUE	FALSE	FALSE
cg22258045	chr8	145002534	145002535	MIR661	724031	16911	CGI-S-Shore	FALSE	TRUE	FALSE
cg22324567	chr8	25899434	25899435	EBF2	64641	3204	CGI	FALSE	TRUE	FALSE
cg22845790	chr8	41694003	41694004	NKX6-3	157848	-50617	Non-CGI	FALSE	TRUE	FALSE
cg22857963	chr8	144358043	144358044	GLI4	2738	8435	CGI	FALSE	TRUE	FALSE
cg22882523	chr8	145107012	145107013	OPLAH	26873	8570	CGI	FALSE	TRUE	FALSE
cg22973468	chr8	54569817	54569818	ATP6V1H	51606	186031	CGI	FALSE	FALSE	TRUE
cg23205034	chr8	98116447	98116448	TSPYL5	85453	173727	Non-CGI	FALSE	TRUE	FALSE
cg23242862	chr8	65491152	65491153	BHLHE22	27319	-1641	CGI	TRUE	TRUE	FALSE
cg23287005	chr8	141588165	141588166	2002-08-01	27161	57479	CGI	FALSE	TRUE	FALSE
cg23346544	chr8	80731144	80731145	HEY1	23462	-51045	Non-CGI	FALSE	TRUE	FALSE
cg23493787	chr8	134829084	134829085	ST3GAL1	6482	-244900	Non-CGI	FALSE	FALSE	TRUE
cg24603408	chr8	22562397	22562398	EGR3	1960	-11581	CGI	FALSE	FALSE	TRUE
cg25206157	chr8	144368438	144368439	ZNF696	79943	-5119	CGI-S-Shore	FALSE	FALSE	TRUE
cg25900150	chr8	144601851	144601852	ZC3H3	23144	21767	CGI-S-Shelf	FALSE	TRUE	FALSE
cg26209487	chr8	56931739	56931740	SNORD54	26795	54719	Non-CGI	FALSE	FALSE	TRUE
cg26286901	chr8	22595307	22595308	EGR3	1960	-44491	CGI-N-Shore	FALSE	TRUE	FALSE
cg26394282	chr8	42122810	42122811	IKBKB	3551	-6008	Non-CGI	FALSE	FALSE	TRUE
cg26728390	chr8	145777781	145777782	C8orf82	414919	-23322	CGI-S-Shelf	FALSE	TRUE	FALSE
cg26883840	chr8	36942104	36942105	KCNU1	157855	300261	Non-CGI	FALSE	FALSE	TRUE
cg26925231	chr8	15094380	15094381	SGCZ	137868	1410	CGI	FALSE	TRUE	FALSE
cg27483474	chr8	143809371	143809372	THEM6	51337	749	CGI	TRUE	TRUE	FALSE
cg13406860	chr9	132881336	132881337	NCS1	23413	-53519	Non-CGI	FALSE	TRUE	FALSE
cg13470341	chr9	977490	977491	DMRT3	58524	525	CGI	FALSE	TRUE	FALSE
cg13496979	chr9	133308888	133308889	ASS1	445	-11204	CGI	FALSE	TRUE	FALSE
cg13520026	chr9	97810769	97810770	MIR23B	407011	-36719	CGI	FALSE	TRUE	FALSE
cg13541353	chr9	32426330	32426331	ACO1	48	41728	Non-CGI	FALSE	TRUE	FALSE
cg13623268	chr9	78912437	78912438	RFK	55312	97005	CGI-N-Shore	FALSE	TRUE	FALSE
cg13626632	chr9	124131165	124131166	STOM	2040	1378	CGI-N-Shore	FALSE	TRUE	FALSE
cg13683626	chr9	95478300	95478301	IPPK	64768	-45752	CGI-S-Shore	FALSE	TRUE	FALSE
cg13688262	chr9	35609485	35609486	MIR4667	100616214	1400	CGI-S-Shelf	FALSE	TRUE	FALSE
cg13725340	chr9	135432492	135432493	BARHL1	56751	-25499	CGI-S-Shore	FALSE	TRUE	FALSE
cg13762887	chr9	131517731	131517732	ZER1	10444	16465	Non-CGI	FALSE	TRUE	FALSE
cg13861122	chr9	91849710	91849711	SHC3	53358	-56027	CGI	FALSE	FALSE	TRUE
cg13938361	chr9	35679915	35679916	ARHGEF39	84904	-4051	CGI-S-Shelf	FALSE	TRUE	FALSE
cg13947534	chr9	135362421	135362422	C9orf171	389799	76809	CGI	FALSE	TRUE	FALSE
cg13964092	chr9	126773442	126773443	LHX2	9355	-445	CGI	TRUE	FALSE	FALSE
cg13971025	chr9	137996270	137996271	OLFM1	10439	29180	CGI-N-Shore	TRUE	TRUE	FALSE
cg13977827	chr9	14307195	14307196	NFIB	4781	91785	CGI	FALSE	TRUE	FALSE
cg14023309	chr9	140188408	140188409	NRARP	441478	8293	CGI-S-Shore	FALSE	FALSE	TRUE
cg14024893	chr9	139943146	139943147	NPDC1	56654	-2469	CGI-N-Shore	FALSE	TRUE	FALSE
cg14028671	chr9	139937558	139937559	NPDC1	56654	3116	CGI-S-Shelf	TRUE	TRUE	FALSE
cg14035368	chr9	139258938	139258939	DNLZ	728489	-696	CGI	TRUE	TRUE	FALSE
cg14040679	chr9	98811442	98811443	LOC158435	158435	-16677	CGI	FALSE	FALSE	TRUE
cg14064335	chr9	139540822	139540823	EGFL7	51162	-12484	CGI-S-Shore	FALSE	FALSE	TRUE
cg14087341	chr9	135232075	135232076	SETX	23064	-1702	CGI	TRUE	FALSE	FALSE
cg14092626	chr9	79629668	79629669	FOXB2	442425	-4901	CGI	FALSE	FALSE	TRUE
cg14188346	chr9	98811640	98811641	LOC158435	158435	-16479	CGI	FALSE	FALSE	TRUE
cg14189141	chr9	1042605	1042606	DMRT2	10655	-7739	CGI	FALSE	FALSE	TRUE
cg14236976	chr9	129377989	129377990	LMX1B	4010	1266	CGI	FALSE	TRUE	FALSE
cg14284797	chr9	136545056	136545057	DBH	1621	43570	CGI	FALSE	TRUE	FALSE
cg14294859	chr9	130862556	130862557	LOC100289019	100289019	18455	CGI-S-Shore	FALSE	TRUE	FALSE
cg14319286	chr9	117257579	117257580	DFNB31	25861	10155	Non-CGI	FALSE	TRUE	FALSE
cg14348741	chr9	139880223	139880224	LCNL1	401562	2777	CGI	FALSE	FALSE	TRUE
cg14362630	chr9	133308669	133308670	ASS1	445	-11423	CGI	FALSE	TRUE	FALSE
cg14436569	chr9	119085681	119085682	PAPPA	5069	169609	Non-CGI	FALSE	TRUE	FALSE
cg14459158	chr9	96720562	96720563	BARX1	56033	-2953	CGI-N-Shore	FALSE	FALSE	TRUE
cg14507433	chr9	96275894	96275895	FAM120AOS	158293	-60019	CGI-N-Shelf	FALSE	TRUE	FALSE
cg14601621	chr9	97848457	97848458	MIR3074	100422842	-80	CGI	TRUE	TRUE	FALSE
cg21163944	chr9	139730261	139730262	MIR4292	100422860	4851	CGI	TRUE	TRUE	FALSE
cg21232476	chr9	125667249	125667250	RC3H2	54542	311	CGI	FALSE	TRUE	FALSE
cg21232956	chr9	129677782	129677783	RALGPS1	9649	728	CGI	FALSE	TRUE	FALSE
cg21243944	chr9	137118148	137118149	RNU6ATAC	100151684	-88461	Non-CGI	FALSE	FALSE	TRUE
cg25287474	chr9	14693538	14693539	ZDHHC21	340481	-57	CGI	TRUE	FALSE	FALSE
cg00201819	chr10	134910421	134910422	GPR123	84435	25987	CGI	FALSE	TRUE	FALSE
cg00630724	chr10	103991299	103991300	ELOVL3	83401	5155	CGI	FALSE	TRUE	FALSE
cg01261351	chr10	118030292	118030293	GFRA1	2674	2832	CGI-N-Shore	FALSE	TRUE	FALSE
cg01316378	chr10	63629580	63629581	ARID5B	84159	-31431	CGI-S-Shore	FALSE	FALSE	TRUE
cg01464515	chr10	72254323	72254324	PALD1	27143	15758	Non-CGI	FALSE	TRUE	FALSE
cg02208820	chr10	577713	577714	PRR26	414235	-118173	CGI	FALSE	TRUE	FALSE
cg02220418	chr10	130831421	130831422	MGMT	4255	-434031	CGI	FALSE	FALSE	TRUE
cg02283485	chr10	81003020	81003021	PPIF	10105	-104198	CGI	TRUE	TRUE	FALSE
cg02446151	chr10	103330164	103330165	POLL	27343	17861	CGI	TRUE	FALSE	FALSE
cg02886408	chr10	133796164	133796165	BNIP3	664	-728	CGI	TRUE	FALSE	FALSE
cg02921122	chr10	126712074	126712075	MIR4296	100423041	9363	CGI	FALSE	TRUE	FALSE
cg03180457	chr10	43133994	43133995	ZNF33B	7582	-1	CGI	TRUE	FALSE	FALSE
cg03294704	chr10	132365913	132365914	MIR378C	100422867	395016	CGI	FALSE	FALSE	TRUE
cg03371778	chr10	132365775	132365776	MIR378C	100422867	395154	CGI	FALSE	FALSE	TRUE
cg03626186	chr10	5882466	5882467	GDI2	2665	-26953	CGI	FALSE	FALSE	TRUE
cg04007726	chr10	80981129	80981130	PPIF	10105	-126089	CGI	FALSE	TRUE	FALSE
cg04218760	chr10	45406644	45406645	TMEM72	643236	-118	Non-CGI	TRUE	TRUE	FALSE
cg04315947	chr10	98272633	98272634	TLL2	7093	1048	CGI	FALSE	TRUE	FALSE
cg04319685	chr10	134021501	134021502	DPYSL4	10570	21086	CGI	FALSE	TRUE	FALSE
cg04322572	chr10	43447618	43447619	RET	5979	-124897	CGI-S-Shore	FALSE	FALSE	TRUE
cg04453124	chr10	79596240	79596241	DLG5	9231	90106	Non-CGI	FALSE	TRUE	FALSE
cg04775315	chr10	71168737	71168738	TACR2	6865	7935	CGI	TRUE	TRUE	FALSE
cg05186311	chr10	131758454	131758455	EBF3	253738	3635	CGI	FALSE	TRUE	FALSE
cg05226959	chr10	131690763	131690764	MIR4297	100422873	-49124	CGI-N-Shore	FALSE	TRUE	FALSE
cg05653707	chr10	119304938	119304939	EMX2OS	196047	-358	CGI	TRUE	TRUE	FALSE
cg05655953	chr10	123810032	123810033	TACC2	10579	61342	Non-CGI	FALSE	TRUE	FALSE
cg05664664	chr10	75173569	75173570	ANXA7	310	270	CGI	FALSE	TRUE	FALSE
cg05757757	chr10	80008637	80008638	LINC00856	100132987	254	CGI	TRUE	FALSE	FALSE
cg06456154	chr10	119310356	119310357	EMX2OS	196047	-5776	CGI	FALSE	FALSE	TRUE
cg06636244	chr10	3572706	3572707	KLF6	1316	254765	CGI	FALSE	TRUE	FALSE
cg06697471	chr10	133606998	133606999	FLJ46300	399827	15535	CGI	FALSE	TRUE	FALSE
cg06874216	chr10	131477661	131477662	MIR4297	100422873	163975	CGI-N-Shore	FALSE	TRUE	FALSE
cg06888746	chr10	105517764	105517765	LOC100505839	100505839	11226	Non-CGI	FALSE	TRUE	FALSE
cg06902558	chr10	3141803	3141804	PFKP	5214	32090	CGI	FALSE	TRUE	FALSE
cg06966660	chr10	123923066	123923067	BTBD16	118663	-107753	CGI	TRUE	TRUE	FALSE
cg07421032	chr10	134756306	134756307	NA	255352	-216	CGI	TRUE	FALSE	FALSE
cg07450214	chr10	27389879	27389880	ANKRD26	22852	-451	CGI-S-Shore	TRUE	FALSE	FALSE
cg07503918	chr10	54068594	54068595	PRKG1-AS1	100506939	5292	CGI	FALSE	TRUE	FALSE
cg07600170	chr10	134064227	134064228	DPYSL4	10570	63812	CGI	TRUE	TRUE	FALSE
cg07785737	chr10	71176850	71176851	TACR2	6865	-175	Non-CGI	TRUE	FALSE	FALSE
cg08195405	chr10	103334202	103334203	POLL	27343	13823	CGI	FALSE	TRUE	FALSE
cg08325191	chr10	134756610	134756611	NA	255352	-520	CGI	TRUE	FALSE	FALSE
cg08732300	chr10	50506885	50506886	C10orf71	118461	-300	CGI-N-Shore	TRUE	FALSE	FALSE
cg08905239	chr10	72973765	72973766	UNC5B	219699	1472	CGI	FALSE	TRUE	FALSE
cg08908184	chr10	102890974	102890975	TLX1NB	100038246	-70	CGI-N-Shore	TRUE	FALSE	FALSE
cg09168604	chr10	88127188	88127189	GRID1	2894	-937	CGI	TRUE	FALSE	FALSE
cg09323395	chr10	134980671	134980672	KNDC1	85442	6699	CGI	TRUE	TRUE	FALSE
cg09979641	chr10	135021100	135021101	UTF1	8433	-22676	CGI	FALSE	TRUE	FALSE
cg10261325	chr10	29874759	29874760	MIR938	100126327	16514	CGI-N-Shore	FALSE	TRUE	FALSE
cg10595547	chr10	119310911	119310912	EMX2OS	196047	-6331	CGI	FALSE	FALSE	TRUE
cg10780890	chr10	102978277	102978278	LBX1	10660	10438	CGI	FALSE	FALSE	TRUE
cg10849393	chr10	94332706	94332707	IDE	3416	1144	CGI-N-Shore	FALSE	TRUE	FALSE
cg11430259	chr10	123355748	123355749	FGFR2	2263	2222	CGI	TRUE	TRUE	FALSE
cg12273284	chr10	12490844	12490845	CAMK1D	57118	99260	Non-CGI	FALSE	TRUE	FALSE
cg12664173	chr10	6220910	6220911	MIR3155B	100628560	-26684	CGI	FALSE	TRUE	FALSE
cg13361703	chr10	95653447	95653448	SLC35G1	159371	-281	CGI-N-Shore	TRUE	FALSE	FALSE
cg13896748	chr10	30872987	30872988	LYZL2	119180	45658	Non-CGI	FALSE	FALSE	TRUE
cg14159304	chr10	105212236	105212237	CALHM2	51063	420	CGI	TRUE	TRUE	FALSE
cg14435498	chr10	133251574	133251575	TCERG1L	256536	-141589	CGI	FALSE	FALSE	TRUE
cg14464551	chr10	130828619	130828620	MGMT	4255	-436833	CGI	FALSE	FALSE	TRUE
cg14471569	chr10	604523	604524	PRR26	414235	-91363	Non-CGI	FALSE	TRUE	FALSE
cg14537549	chr10	12393185	12393186	CAMK1D	57118	1601	CGI-S-Shore	FALSE	TRUE	FALSE
cg14606586	chr10	124899755	124899756	HMX3	340784	4187	CGI	FALSE	FALSE	TRUE
cg14673387	chr10	47008185	47008186	GPRIN2	9721	14638	CGI	FALSE	FALSE	TRUE
cg15205441	chr10	126782357	126782358	MIR4296	100423041	-60917	Non-CGI	FALSE	TRUE	FALSE
cg15228268	chr10	3146741	3146742	PFKP	5214	37028	CGI	TRUE	TRUE	FALSE
cg15920379	chr10	114886678	114886679	TCF7L2	6934	176668	CGI	FALSE	TRUE	FALSE
cg16234557	chr10	119292062	119292063	EMX2	2018	-9892	CGI-N-Shore	FALSE	TRUE	FALSE
cg17247873	chr10	134332277	134332278	INPP5A	3632	-19074	CGI	TRUE	FALSE	FALSE
cg17422774	chr10	124901928	124901929	HMX2	3167	-5708	CGI-S-Shore	FALSE	FALSE	TRUE
cg17608345	chr10	73822644	73822645	SPOCK2	9806	26144	CGI	FALSE	TRUE	FALSE
cg17677758	chr10	682125	682126	PRR26	414235	-13761	CGI-N-Shore	FALSE	TRUE	FALSE
cg17805624	chr10	134692989	134692990	NA	255352	63098	CGI	FALSE	TRUE	FALSE
cg17861863	chr10	1454387	1454388	ADARB2-AS1	642394	-114436	CGI	FALSE	TRUE	FALSE
cg17940587	chr10	89292231	89292232	MINPP1	9562	28007	Non-CGI	FALSE	TRUE	FALSE
cg18276125	chr10	102749041	102749042	C10orf2	56652	1747	CGI	TRUE	TRUE	FALSE
cg18403995	chr10	43134038	43134039	ZNF33B	7582	-45	CGI	TRUE	FALSE	FALSE
cg18477674	chr10	133793527	133793528	BNIP3	664	1906	CGI	FALSE	TRUE	FALSE
cg18675043	chr10	105453224	105453225	LOC100505839	100505839	-53311	CGI	TRUE	TRUE	FALSE
cg19297537	chr10	71142369	71142370	TACR2	6865	34303	CGI	FALSE	TRUE	FALSE
cg19912142	chr10	119494671	119494672	EMX2OS	196047	-190091	CGI	FALSE	FALSE	TRUE
cg19925204	chr10	119307692	119307693	EMX2OS	196047	-3112	CGI-S-Shore	FALSE	TRUE	FALSE
cg20133200	chr10	3141887	3141888	PFKP	5214	32174	CGI	FALSE	TRUE	FALSE
cg20170943	chr10	3536773	3536774	KLF6	1316	290698	CGI	FALSE	TRUE	FALSE
cg20241299	chr10	105362799	105362800	NEURL	9148	109063	CGI	FALSE	TRUE	FALSE
cg20251943	chr10	407721	407722	ZMYND11	10771	227315	CGI-N-Shore	FALSE	TRUE	FALSE
cg20281962	chr10	8089733	8089734	GATA3-AS1	399717	5712	CGI	FALSE	FALSE	TRUE
cg20345589	chr10	104179471	104179472	PSD	5662	218	CGI	TRUE	TRUE	FALSE
cg20595750	chr10	405225	405226	ZMYND11	10771	224819	CGI	FALSE	TRUE	FALSE
cg20668662	chr10	105452885	105452886	LOC100505839	100505839	-53650	CGI	TRUE	TRUE	FALSE
cg21373996	chr10	560669	560670	PRR26	414235	-135217	CGI-S-Shore	FALSE	TRUE	FALSE
cg22738219	chr10	13043313	13043314	CCDC3	83643	98398	CGI	TRUE	TRUE	FALSE
cg22773334	chr10	131569486	131569487	MIR4297	100422873	72150	CGI	FALSE	FALSE	TRUE
cg22792176	chr10	130274452	130274453	MKI67	4288	-349983	Non-CGI	FALSE	FALSE	TRUE
cg23249922	chr10	134231549	134231550	PWWP2B	170394	20846	CGI-S-Shore	FALSE	FALSE	TRUE
cg23361862	chr10	15256422	15256423	NMT2	9397	-45726	CGI	FALSE	TRUE	FALSE
cg23426945	chr10	77190054	77190055	ZNF503	84858	-28540	CGI-N-Shore	FALSE	FALSE	TRUE
cg23471067	chr10	133793477	133793478	BNIP3	664	1956	CGI	FALSE	TRUE	FALSE
cg23901444	chr10	49812963	49812964	ARHGAP22	58504	51345	CGI	TRUE	TRUE	FALSE
cg23943136	chr10	8095755	8095756	GATA3-AS1	399717	-307	CGI	TRUE	FALSE	FALSE
cg23954465	chr10	8078038	8078039	GATA3-AS1	399717	17407	CGI	FALSE	FALSE	TRUE
cg23962250	chr10	134755955	134755956	NA	255352	132	CGI	TRUE	FALSE	FALSE
cg24098326	chr10	123923050	123923051	BTBD16	118663	-107769	CGI	TRUE	TRUE	FALSE
cg24098603	chr10	105991578	105991579	WDR96	80217	540	CGI-N-Shore	FALSE	TRUE	FALSE
cg24202817	chr10	6220943	6220944	MIR3155B	100628560	-26717	CGI	FALSE	TRUE	FALSE
cg24234899	chr10	118922493	118922494	MIR3663	100500893	4790	CGI	FALSE	FALSE	TRUE
cg24280832	chr10	77871958	77871959	C10orf11	83938	329438	CGI	FALSE	TRUE	FALSE
cg24288527	chr10	93390347	93390348	PPP1R3C	5507	2509	CGI	FALSE	TRUE	FALSE
cg24677093	chr10	77166172	77166173	ZNF503	84858	-4658	CGI	FALSE	TRUE	FALSE
cg24725789	chr10	119310288	119310289	EMX2OS	196047	-5708	CGI-N-Shore	FALSE	FALSE	TRUE
cg24969520	chr10	45359715	45359716	TMEM72	643236	-47047	CGI	FALSE	TRUE	FALSE
cg25023298	chr10	77156697	77156698	ZNF503-AS2	100131213	-4587	CGI	FALSE	FALSE	TRUE
cg25123362	chr10	133793734	133793735	BNIP3	664	1699	CGI	FALSE	TRUE	FALSE
cg25400378	chr10	133558485	133558486	FLJ46300	399827	64048	CGI	FALSE	FALSE	TRUE
cg25552843	chr10	106088702	106088703	ITPRIP	85450	9458	Non-CGI	TRUE	TRUE	FALSE
cg25721039	chr10	49732419	49732420	ARHGAP22	58504	131889	CGI	FALSE	TRUE	FALSE
cg25828207	chr10	134261655	134261656	C10orf91	170393	2940	Non-CGI	FALSE	TRUE	FALSE
cg25830307	chr10	77871644	77871645	C10orf11	83938	329124	CGI-N-Shore	FALSE	TRUE	FALSE
cg25920406	chr10	35929369	35929370	FZD8	8325	991	CGI	TRUE	FALSE	FALSE
cg25949033	chr10	3149760	3149761	PITRM1-AS1	100507034	-34031	CGI	TRUE	TRUE	FALSE
cg26071526	chr10	123923273	123923274	BTBD16	118663	-107546	CGI	TRUE	TRUE	FALSE
cg26275858	chr10	131694689	131694690	MIR4297	100422873	-53050	CGI-N-Shore	FALSE	TRUE	FALSE
cg26285605	chr10	135050698	135050699	VENTX	27287	-708	CGI	TRUE	FALSE	FALSE
cg26395382	chr10	88728235	88728236	ADIRF	10974	46	CGI	TRUE	TRUE	FALSE
cg26425933	chr10	115999385	115999386	VWA2	340706	366	CGI	FALSE	TRUE	FALSE
cg26600802	chr10	115939115	115939116	TDRD1	56165	85	CGI	TRUE	FALSE	FALSE
cg26819718	chr10	77872170	77872171	C10orf11	83938	329650	CGI	FALSE	TRUE	FALSE
cg26820037	chr10	103534501	103534502	FGF8	2253	5623	CGI	FALSE	TRUE	FALSE
cg26984593	chr10	14051636	14051637	PRPF18	8559	422696	CGI-S-Shore	TRUE	TRUE	FALSE
cg27059598	chr10	21797661	21797662	C10orf114	399726	-11447	CGI-S-Shore	FALSE	FALSE	TRUE
cg27173819	chr10	134043635	134043636	DPYSL4	10570	43220	CGI-S-Shore	TRUE	TRUE	FALSE
cg27312979	chr10	97094453	97094454	PDLIM1	9124	-43671	Non-CGI	FALSE	TRUE	FALSE
cg00317879	chr11	68920611	68920612	TPCN2	219931	104260	CGI	FALSE	FALSE	TRUE
cg00350835	chr11	16838596	16838597	SOX6	55553	-78405	CGI	TRUE	TRUE	FALSE
cg00382572	chr11	2574042	2574043	KCNQ1	3784	107820	CGI	FALSE	TRUE	FALSE
cg00456892	chr11	124629925	124629926	ESAM	90952	2296	CGI	FALSE	TRUE	FALSE
cg01097384	chr11	1358675	1358676	LOC255512	255512	27736	CGI	FALSE	FALSE	TRUE
cg01120391	chr11	69924147	69924148	ANO1	55107	-259	CGI	TRUE	FALSE	FALSE
cg01195276	chr11	121567477	121567478	SORL1	6653	244564	Non-CGI	FALSE	FALSE	TRUE
cg01274643	chr11	1283946	1283947	TOLLIP	54472	46944	Non-CGI	FALSE	FALSE	TRUE
cg01280128	chr11	66034963	66034964	RAB1B	81876	-1091	CGI	TRUE	TRUE	FALSE
cg01541578	chr11	477804	477805	PTDSS2	81490	27523	CGI	FALSE	TRUE	FALSE
cg01963702	chr11	12188996	12188997	MICAL2	9645	73452	Non-CGI	FALSE	TRUE	FALSE
cg02046143	chr11	133797911	133797912	LOC283174	283174	-26275	CGI-N-Shelf	FALSE	TRUE	FALSE
cg02589685	chr11	2889629	2889630	KCNQ1DN	55539	-1632	CGI-N-Shore	TRUE	FALSE	FALSE
cg02907374	chr11	15095028	15095029	CALCB	797	-116	CGI	TRUE	FALSE	FALSE
cg03098782	chr11	130067861	130067862	ST14	6768	38178	CGI-S-Shore	FALSE	TRUE	FALSE
cg03142039	chr11	125931532	125931533	CDON	50937	1653	CGI-N-Shore	FALSE	TRUE	FALSE
cg03155200	chr11	2833259	2833260	KCNQ1DN	55539	-58002	Non-CGI	FALSE	TRUE	FALSE
cg03820779	chr11	2573972	2573973	KCNQ1	3784	107750	CGI	FALSE	TRUE	FALSE
cg03845683	chr11	64933489	64933490	SPDYC	387778	-4216	CGI	FALSE	FALSE	TRUE
cg04021962	chr11	441986	441987	ANO9	338440	23	Non-CGI	TRUE	FALSE	FALSE
cg04396791	chr11	70508180	70508181	MIR3664	100500844	210291	CGI	TRUE	TRUE	FALSE
cg04420309	chr11	66824445	66824446	RHOD	29984	155	CGI	TRUE	FALSE	FALSE
cg04421271	chr11	87908938	87908939	RAB38	23682	-302	CGI-S-Shore	TRUE	FALSE	FALSE
cg04800788	chr11	123396571	123396572	GRAMD1B	57476	42	Non-CGI	TRUE	FALSE	FALSE
cg04859117	chr11	2011341	2011342	MRPL23-AS1	100133545	-190	CGI-N-Shelf	TRUE	FALSE	FALSE
cg04968127	chr11	10715213	10715214	MRVI1	10335	320	Non-CGI	TRUE	FALSE	FALSE
cg05057976	chr11	65779667	65779668	CST6	1474	204	CGI	TRUE	FALSE	FALSE
cg05290058	chr11	2890551	2890552	KCNQ1DN	55539	-710	CGI	TRUE	FALSE	FALSE
cg05403655	chr11	125215457	125215458	FEZ1	9638	150747	Non-CGI	FALSE	TRUE	FALSE
cg05409391	chr11	1886783	1886784	MIR4298	100423021	-6016	Non-CGI	FALSE	TRUE	FALSE
cg05725263	chr11	66650560	66650561	LRFN4	78999	25683	Non-CGI	FALSE	TRUE	FALSE
cg05774229	chr11	76033097	76033098	PRKRIR	5612	58781	CGI	FALSE	FALSE	TRUE
cg05847772	chr11	118122973	118122974	MPZL3	196264	36	CGI	TRUE	FALSE	FALSE
cg05904366	chr11	442072	442073	ANO9	338440	-60	Non-CGI	TRUE	FALSE	FALSE
cg05984508	chr11	68098869	68098870	LRP5	4041	18760	CGI-S-Shelf	FALSE	TRUE	FALSE
cg06210783	chr11	68205335	68205336	PPP6R3	55291	-22849	CGI-N-Shore	FALSE	TRUE	FALSE
cg06223539	chr11	70517374	70517375	MIR3664	100500844	201097	CGI	FALSE	TRUE	FALSE
cg06282270	chr11	61062910	61062911	VWCE	220001	-121	CGI	TRUE	FALSE	FALSE
cg06522412	chr11	123172742	123172743	MIR4493	100616319	79476	CGI	FALSE	FALSE	TRUE
cg06573253	chr11	66032674	66032675	RAB1B	81876	-3380	CGI-N-Shelf	FALSE	TRUE	FALSE
cg06665913	chr11	113947036	113947037	ZBTB16	7704	16604	CGI	FALSE	TRUE	FALSE
cg06679296	chr11	1949032	1949033	TNNT3	7140	8232	CGI	FALSE	TRUE	FALSE
cg06885583	chr11	10715445	10715446	MRVI1	10335	88	Non-CGI	TRUE	FALSE	FALSE
cg06911753	chr11	47611236	47611237	FAM180B	399888	3005	CGI	FALSE	TRUE	FALSE
cg06996029	chr11	67017617	67017618	ADRBK1	156	-16286	CGI-N-Shore	FALSE	TRUE	FALSE
cg07067744	chr11	1421172	1421173	BRSK2	9024	10042	CGI-N-Shore	FALSE	TRUE	FALSE
cg07080244	chr11	120051676	120051677	OAF	220323	-30069	Non-CGI	FALSE	FALSE	TRUE
cg07333715	chr11	2292691	2292692	ASCL2	430	-508	CGI	TRUE	FALSE	FALSE
cg07408779	chr11	65315205	65315206	LTBP3	4054	11046	CGI	TRUE	TRUE	FALSE
cg07809301	chr11	112038173	112038174	TEX12	56158	77	CGI	TRUE	TRUE	FALSE
cg07979757	chr11	2828652	2828653	KCNQ1DN	55539	-62609	CGI	FALSE	TRUE	FALSE
cg07985116	chr11	68204497	68204498	PPP6R3	55291	-23687	CGI-N-Shore	FALSE	TRUE	FALSE
cg08069287	chr11	72868833	72868834	FCHSD2	9873	-15689	Non-CGI	FALSE	FALSE	TRUE
cg08145723	chr11	130029478	130029479	ST14	6768	-202	CGI	TRUE	FALSE	FALSE
cg08227583	chr11	2118566	2118567	MIR483	619552	36871	CGI	FALSE	FALSE	TRUE
cg08265933	chr11	76858759	76858760	MYO7A	4647	19448	CGI-N-Shore	FALSE	TRUE	FALSE
cg08387014	chr11	1848742	1848743	SYT8	90019	32	CGI-S-Shore	TRUE	FALSE	FALSE
cg08550441	chr11	65641035	65641036	EFEMP2	30008	-629	CGI	TRUE	FALSE	FALSE
cg08632909	chr11	70048796	70048797	FADD	8772	-471	CGI-N-Shore	TRUE	FALSE	FALSE
cg08668551	chr11	126873181	126873182	KIRREL3	84623	172	CGI	TRUE	FALSE	FALSE
cg08726248	chr11	637032	637033	DRD4	1815	-271	CGI	TRUE	FALSE	FALSE
cg08825225	chr11	128586960	128586961	FLI1-AS1	100507392	-21041	Non-CGI	FALSE	TRUE	FALSE
cg08885142	chr11	69264296	69264297	CCND1	595	-191575	CGI-S-Shelf	FALSE	FALSE	TRUE
cg09254350	chr11	2574026	2574027	KCNQ1	3784	107804	CGI	FALSE	TRUE	FALSE
cg09929831	chr11	15095585	15095586	CALCB	797	438	CGI	FALSE	TRUE	FALSE
cg10353539	chr11	113185349	113185350	TTC12	54970	97	CGI	TRUE	TRUE	FALSE
cg10405205	chr11	70261230	70261231	CTTN	2017	16617	CGI	FALSE	TRUE	FALSE
cg10542562	chr11	128556382	128556383	FLI1	2313	-46	CGI	TRUE	FALSE	FALSE
cg10547005	chr11	73372676	73372677	PLEKHB1	58473	15452	CGI-S-Shore	FALSE	TRUE	FALSE
cg10771851	chr11	68204486	68204487	PPP6R3	55291	-23698	CGI-N-Shore	FALSE	TRUE	FALSE
cg10900641	chr11	1767793	1767794	IFITM10	402778	4029	CGI-N-Shore	FALSE	TRUE	FALSE
cg10904972	chr11	119227328	119227329	C1QTNF5	114902	-9944	CGI	FALSE	TRUE	FALSE
cg11660146	chr11	120110688	120110689	POU2F3	25833	3338	CGI	TRUE	TRUE	FALSE
cg11854154	chr11	10472133	10472134	AMPD3	272	264	CGI	TRUE	TRUE	FALSE
cg12318400	chr11	10472159	10472160	AMPD3	272	290	CGI	TRUE	TRUE	FALSE
cg12355172	chr11	67418315	67418316	ACY3	91703	-184	CGI-S-Shore	TRUE	FALSE	FALSE
cg12536891	chr11	72044829	72044830	PHOX2A	401	-89608	Non-CGI	FALSE	TRUE	FALSE
cg12906748	chr11	8954576	8954577	C11orf16	56673	-22	Non-CGI	TRUE	FALSE	FALSE
cg13177786	chr11	10472099	10472100	AMPD3	272	230	CGI	TRUE	TRUE	FALSE
cg13253153	chr11	2826988	2826989	KCNQ1DN	55539	-64273	CGI	FALSE	TRUE	FALSE
cg13280108	chr11	70398751	70398752	CTTN	2017	154138	CGI	FALSE	TRUE	FALSE
cg13356117	chr11	113185561	113185562	TTC12	54970	309	CGI	TRUE	TRUE	FALSE
cg13601740	chr11	66627194	66627195	LRFN4	78999	2317	CGI-S-Shore	FALSE	TRUE	FALSE
cg13821914	chr11	2031890	2031891	H19	283120	-12824	CGI-N-Shore	FALSE	FALSE	TRUE
cg13851843	chr11	17498329	17498330	ABCC8	6833	118	CGI	TRUE	FALSE	FALSE
cg13883397	chr11	61900852	61900853	INCENP	3619	9406	CGI-S-Shelf	FALSE	TRUE	FALSE
cg14108978	chr11	73021145	73021146	ARHGEF17	9828	1481	CGI	TRUE	FALSE	FALSE
cg14177934	chr11	63529891	63529892	C11orf95	65998	6220	CGI-N-Shore	FALSE	TRUE	FALSE
cg14243481	chr11	7272867	7272868	SYT9	143425	12857	CGI	TRUE	TRUE	FALSE
cg14359435	chr11	119227592	119227593	C1QTNF5	114902	-10208	CGI	FALSE	TRUE	FALSE
cg14677673	chr11	972871	972872	AP2A2	161	47061	CGI-S-Shore	FALSE	TRUE	FALSE
cg14830082	chr11	130067806	130067807	ST14	6768	38123	CGI-S-Shore	FALSE	TRUE	FALSE
cg14981432	chr11	61555930	61555931	MIR611	693196	4101	CGI-N-Shelf	TRUE	TRUE	FALSE
cg15056794	chr11	121987155	121987156	BLID	414899	-231	Non-CGI	TRUE	TRUE	FALSE
cg15131371	chr11	123036897	123036898	CLMP	79827	29108	Non-CGI	FALSE	TRUE	FALSE
cg15505860	chr11	10715571	10715572	MRVI1	10335	-35	Non-CGI	TRUE	FALSE	FALSE
cg15567360	chr11	71322699	71322700	KRTAP5-11	440051	-28777	CGI	FALSE	FALSE	TRUE
cg15658484	chr11	66035446	66035447	RAB1B	81876	-608	CGI	TRUE	FALSE	FALSE
cg15701612	chr11	130253770	130253771	ADAMTS8	11095	44767	Non-CGI	FALSE	TRUE	FALSE
cg16005559	chr11	120040616	120040617	TRIM29	23650	-31752	CGI	FALSE	FALSE	TRUE
cg16570157	chr11	829783	829784	CD151	977	-3167	CGI	FALSE	TRUE	FALSE
cg16652651	chr11	10472161	10472162	AMPD3	272	292	CGI	TRUE	TRUE	FALSE
cg16997203	chr11	44972679	44972680	TP53I11	9537	159	CGI	TRUE	FALSE	FALSE
cg17037101	chr11	2161314	2161315	IGF2-AS	51214	-442	CGI	TRUE	TRUE	FALSE
cg17223748	chr11	1960093	1960094	MRPL23	6150	-8407	CGI	FALSE	FALSE	TRUE
cg17282004	chr11	47615333	47615334	C1QTNF4	114900	626	CGI-N-Shore	FALSE	TRUE	FALSE
cg17542333	chr11	10673844	10673845	MRVI1	10335	41689	Non-CGI	TRUE	TRUE	FALSE
cg18242131	chr11	16626109	16626110	C11orf58	10944	-134037	CGI	FALSE	TRUE	FALSE
cg18262591	chr11	68579970	68579971	CPT1A	1374	29427	CGI-N-Shelf	FALSE	TRUE	FALSE
cg18281160	chr11	115375341	115375342	CADM1	23705	-99	CGI	TRUE	FALSE	FALSE
cg18356785	chr11	47611780	47611781	FAM180B	399888	3549	CGI	TRUE	TRUE	FALSE
cg18729298	chr11	2555203	2555204	KCNQ1	3784	88981	CGI	FALSE	TRUE	FALSE
cg18971175	chr11	129183160	129183161	BARX2	8538	-62719	Non-CGI	FALSE	FALSE	TRUE
cg18987410	chr11	124791197	124791198	HEPN1	641654	2050	CGI	FALSE	TRUE	FALSE
cg19299755	chr11	116706051	116706052	APOA1	335	2285	CGI-N-Shore	FALSE	FALSE	TRUE
cg19450056	chr11	2118470	2118471	MIR483	619552	36967	CGI	FALSE	FALSE	TRUE
cg19684668	chr11	76290361	76290362	LRRC32	2615	91428	CGI-N-Shelf	FALSE	FALSE	TRUE
cg20023120	chr11	69830611	69830612	ANO1	55107	-93795	CGI-S-Shore	FALSE	FALSE	TRUE
cg20027133	chr11	35547514	35547515	PAMR1	25891	4332	CGI	TRUE	TRUE	FALSE
cg20210482	chr11	126286493	126286494	ST3GAL4	6484	60952	CGI-N-Shore	FALSE	TRUE	FALSE
cg20272155	chr11	1769462	1769463	IFITM10	402778	2360	CGI	FALSE	TRUE	FALSE
cg20638016	chr11	122852694	122852695	BSX	390259	-314	CGI	TRUE	FALSE	FALSE
cg20761187	chr11	133900924	133900925	LOC100128239	100128239	-1241	Non-CGI	TRUE	FALSE	FALSE
cg20771240	chr11	133906693	133906694	LOC100128239	100128239	4525	CGI	FALSE	TRUE	FALSE
cg20803849	chr11	68152309	68152310	LRP5	4041	72200	CGI-N-Shore	FALSE	TRUE	FALSE
cg20979732	chr11	64546243	64546244	SF1	7536	71	CGI	TRUE	FALSE	FALSE
cg21029769	chr11	130029515	130029516	ST14	6768	-165	CGI	TRUE	FALSE	FALSE
cg21127079	chr11	111154826	111154827	C11orf93	120376	-15148	CGI	FALSE	TRUE	FALSE
cg21635854	chr11	20184350	20184351	DBX1	120237	-2479	CGI	FALSE	FALSE	TRUE
cg21784768	chr11	537496	537497	LRRC56	115399	-24	CGI	TRUE	FALSE	FALSE
cg21936959	chr11	68782049	68782050	MRGPRF	116535	-1198	CGI	TRUE	TRUE	FALSE
cg22053861	chr11	65318683	65318684	LTBP3	4054	7568	CGI-S-Shelf	TRUE	TRUE	FALSE
cg22081905	chr11	2441442	2441443	TRPM5	29850	2831	CGI-N-Shore	FALSE	TRUE	FALSE
cg22202264	chr11	133816022	133816023	IGSF9B	22997	10856	Non-CGI	TRUE	TRUE	FALSE
cg22675922	chr11	2889840	2889841	KCNQ1DN	55539	-1421	CGI-N-Shore	TRUE	FALSE	FALSE
cg22996783	chr11	69213768	69213769	MYEOV	26579	152145	Non-CGI	FALSE	FALSE	TRUE
cg23100152	chr11	10472156	10472157	AMPD3	272	287	CGI	TRUE	TRUE	FALSE
cg23676551	chr11	2161374	2161375	IGF2-AS	51214	-382	CGI	TRUE	TRUE	FALSE
cg23831217	chr11	112037969	112037970	TEX12	56158	-124	CGI	TRUE	FALSE	FALSE
cg23935420	chr11	65123609	65123610	TIGD3	220359	1326	CGI	TRUE	TRUE	FALSE
cg24496349	chr11	67810905	67810906	TCIRG1	10312	4442	Non-CGI	TRUE	TRUE	FALSE
cg24716664	chr11	1006121	1006122	MUC6	4588	30583	CGI	FALSE	TRUE	FALSE
cg24862514	chr11	44972672	44972673	TP53I11	9537	166	CGI	TRUE	FALSE	FALSE
cg25101863	chr11	69650231	69650232	FGF3	2248	-16038	Non-CGI	FALSE	FALSE	TRUE
cg25246431	chr11	12398874	12398875	PARVA	55742	-150	CGI-N-Shore	TRUE	FALSE	FALSE
cg25590114	chr11	1661201	1661202	KRTAP5-5	439915	10167	CGI	FALSE	TRUE	FALSE
cg25899829	chr11	75046147	75046148	MIR326	442900	81	Non-CGI	TRUE	TRUE	FALSE
cg26304147	chr11	69924046	69924047	ANO1	55107	-360	CGI	TRUE	FALSE	FALSE
cg26457809	chr11	2890617	2890618	KCNQ1DN	55539	-644	CGI	TRUE	FALSE	FALSE
cg26608883	chr11	15095024	15095025	CALCB	797	-120	CGI	TRUE	FALSE	FALSE
cg26963044	chr11	46388433	46388434	MIR4688	100616368	-9517	CGI	FALSE	TRUE	FALSE
cg27234067	chr11	32460799	32460800	WT1-AS	51352	3513	CGI	TRUE	TRUE	FALSE
cg27323091	chr11	2721619	2721620	KCNQ1OT1	10984	-390	CGI	TRUE	TRUE	FALSE
cg27410186	chr11	128116707	128116708	ETS1	2113	340744	Non-CGI	FALSE	FALSE	TRUE
cg00056489	chr12	111856652	111856653	SH2B3	10019	12899	CGI	TRUE	TRUE	FALSE
cg00230120	chr12	1609346	1609347	LOC100292680	100292680	-309	CGI	TRUE	FALSE	FALSE
cg00723994	chr12	115105290	115105291	TBX3	6926	16677	CGI	FALSE	FALSE	TRUE
cg00960772	chr12	133127270	133127271	LRCOL1	100507055	59765	CGI	TRUE	TRUE	FALSE
cg01184975	chr12	114852091	114852092	TBX5	6910	-5843	CGI	FALSE	FALSE	TRUE
cg01273565	chr12	120128116	120128117	PRKAB1	5564	22358	CGI	FALSE	TRUE	FALSE
cg01352472	chr12	51154575	51154576	ATF1	466	-3212	CGI-N-Shelf	FALSE	FALSE	TRUE
cg01899676	chr12	106988413	106988414	RFX4	5992	11727	Non-CGI	FALSE	TRUE	FALSE
cg02053964	chr12	124950784	124950785	NCOR2	9612	101224	CGI	FALSE	TRUE	FALSE
cg02158978	chr12	133134938	133134939	LRCOL1	100507055	52097	CGI-S-Shore	FALSE	TRUE	FALSE
cg02905599	chr12	133249096	133249097	POLE	5426	14847	CGI-N-Shore	FALSE	TRUE	FALSE
cg03199745	chr12	54454445	54454446	FLJ12825	440101	2406	CGI	FALSE	TRUE	FALSE
cg03257341	chr12	49375499	49375500	WNT1	7471	3262	CGI	FALSE	TRUE	FALSE
cg03539204	chr12	656703	656704	B4GALNT3	283358	87159	CGI	FALSE	TRUE	FALSE
cg04241286	chr12	109728241	109728242	FOXN4	121643	18782	CGI-S-Shore	TRUE	TRUE	FALSE
cg04562909	chr12	114836014	114836015	TBX5-AS1	255480	-9984	CGI-S-Shore	FALSE	TRUE	FALSE
cg04792034	chr12	58263161	58263162	CTDSP2	10106	-22413	CGI-S-Shelf	FALSE	FALSE	TRUE
cg04804877	chr12	3862225	3862226	EFCAB4B	84766	139	CGI	TRUE	FALSE	FALSE
cg04826284	chr12	66563885	66563886	TMBIM4	51643	-77	CGI	TRUE	FALSE	FALSE
cg04879750	chr12	130590529	130590530	FLJ31485	440119	56237	CGI	FALSE	FALSE	TRUE
cg04956585	chr12	130604378	130604379	FLJ31485	440119	42388	CGI	FALSE	FALSE	TRUE
cg05142520	chr12	49364426	49364427	WNT10B	7480	1213	CGI-S-Shore	FALSE	TRUE	FALSE
cg05228634	chr12	93985196	93985197	SOCS2-AS1	144481	-19651	CGI-N-Shore	FALSE	FALSE	TRUE
cg05233774	chr12	66192970	66192971	HMGA2	8091	-24465	Non-CGI	FALSE	TRUE	FALSE
cg05932702	chr12	72148251	72148252	RAB21	23011	-405	CGI-N-Shore	TRUE	FALSE	FALSE
cg06242243	chr12	124992461	124992462	NCOR2	9612	59547	CGI-S-Shore	FALSE	TRUE	FALSE
cg06314111	chr12	58119915	58119916	LOC100130776	100130776	-106	CGI-N-Shore	TRUE	TRUE	FALSE
cg06892868	chr12	110211321	110211322	FAM222A-AS1	84983	-28	Non-CGI	TRUE	FALSE	FALSE
cg06930722	chr12	105114327	105114328	MIR3922	100500843	128915	CGI	FALSE	TRUE	FALSE
cg07161429	chr12	105114162	105114163	MIR3922	100500843	128750	CGI-N-Shore	FALSE	TRUE	FALSE
cg07216036	chr12	132950611	132950612	GALNT9	50614	-44705	Non-CGI	FALSE	FALSE	TRUE
cg07812715	chr12	117483086	117483087	TESC	54997	54163	CGI	FALSE	TRUE	FALSE
cg07967679	chr12	52626814	52626815	KRT7	3855	-138	CGI-N-Shore	TRUE	FALSE	FALSE
cg08036333	chr12	116382986	116382987	MIR620	693205	203471	CGI	FALSE	FALSE	TRUE
cg08192350	chr12	3862417	3862418	EFCAB4B	84766	-50	CGI	TRUE	FALSE	FALSE
cg08340737	chr12	54324544	54324545	HOXC13	3229	-8030	CGI-N-Shore	FALSE	FALSE	TRUE
cg08548429	chr12	117319856	117319857	HRK	8739	-623	CGI	TRUE	FALSE	FALSE
cg08710739	chr12	111470672	111470673	CUX2	23316	-1154	CGI-N-Shore	TRUE	FALSE	FALSE
cg08803500	chr12	54338824	54338825	HOXC13	3229	6247	CGI	FALSE	TRUE	FALSE
cg09263099	chr12	133160509	133160510	LRCOL1	100507055	26526	CGI	FALSE	TRUE	FALSE
cg09771916	chr12	132673274	132673275	NOC4L	79050	44280	CGI	FALSE	FALSE	TRUE
cg09825309	chr12	124990897	124990898	NCOR2	9612	61111	CGI	FALSE	TRUE	FALSE
cg10017293	chr12	51640305	51640306	DAZAP2	9802	7796	Non-CGI	FALSE	TRUE	FALSE
cg10104252	chr12	3563899	3563900	PRMT8	56341	73383	CGI-S-Shore	FALSE	TRUE	FALSE
cg10504392	chr12	110044639	110044640	MVK	4598	33138	Non-CGI	FALSE	FALSE	TRUE
cg10800464	chr12	109162641	109162642	CORO1C	23603	-37345	CGI	FALSE	FALSE	TRUE
cg11122301	chr12	122255844	122255845	SETD1B	23067	13205	CGI	FALSE	TRUE	FALSE
cg11548404	chr12	133076622	133076623	FBRSL1	57666	9464	CGI	FALSE	TRUE	FALSE
cg11892997	chr12	123482053	123482054	MIR4304	100422931	13220	Non-CGI	FALSE	TRUE	FALSE
cg12181579	chr12	114312919	114312920	RBM19	9904	91255	CGI-S-Shore	FALSE	TRUE	FALSE
cg12193731	chr12	52300911	52300912	ACVRL1	94	218	CGI	TRUE	TRUE	FALSE
cg12199406	chr12	6184176	6184177	VWF	7450	49658	CGI-N-Shore	FALSE	TRUE	FALSE
cg12437821	chr12	114852027	114852028	TBX5	6910	-5779	CGI	FALSE	FALSE	TRUE
cg12610207	chr12	114833950	114833951	TBX5-AS1	255480	-12048	CGI	FALSE	TRUE	FALSE
cg12668415	chr12	133297765	133297766	PGAM5	192111	33129	CGI-S-Shore	FALSE	TRUE	FALSE
cg12954245	chr12	62862960	62862961	MON2	23041	2362	CGI-S-Shelf	FALSE	TRUE	FALSE
cg13327785	chr12	132219529	132219530	SFSWAP	6433	23893	CGI	FALSE	TRUE	FALSE
cg13372458	chr12	95267153	95267154	KRT19P2	160313	38978	CGI	FALSE	FALSE	TRUE
cg13500029	chr12	75873039	75873040	GLIPR1	11010	-1472	Non-CGI	TRUE	FALSE	FALSE
cg13697193	chr12	12849138	12849139	GPR19	2842	-16	CGI	TRUE	FALSE	FALSE
cg14270220	chr12	49374982	49374983	WNT1	7471	2745	CGI	FALSE	TRUE	FALSE
cg14298966	chr12	49393226	49393227	DDN	23109	-137	CGI	TRUE	FALSE	FALSE
cg14312334	chr12	120242156	120242157	CIT	11113	72937	CGI	TRUE	TRUE	FALSE
cg14950169	chr12	54145841	54145842	CALCOCO1	57658	-24533	CGI	FALSE	FALSE	TRUE
cg15243578	chr12	123469284	123469285	ARL6IP4	51329	4403	CGI	FALSE	TRUE	FALSE
cg16133088	chr12	3862428	3862429	EFCAB4B	84766	-61	CGI	TRUE	FALSE	FALSE
cg16397032	chr12	114204091	114204092	RBM19	9904	200083	CGI	FALSE	TRUE	FALSE
cg16733705	chr12	85667616	85667617	ALX1	8092	-6418	CGI	FALSE	FALSE	TRUE
cg16844403	chr12	49372180	49372181	WNT1	7471	-54	CGI	TRUE	FALSE	FALSE
cg16889557	chr12	50426531	50426532	RACGAP1	29127	-7223	CGI-N-Shore	FALSE	FALSE	TRUE
cg17339927	chr12	132991124	132991125	FBRSL1	57666	-76031	CGI	FALSE	FALSE	TRUE
cg17402060	chr12	81108011	81108012	MYF5	4617	-2695	CGI-N-Shelf	FALSE	FALSE	TRUE
cg17405139	chr12	131601087	131601088	LOC116437	116437	-48467	Non-CGI	FALSE	TRUE	FALSE
cg19014335	chr12	50099568	50099569	FMNL3	91010	1627	CGI-N-Shore	FALSE	TRUE	FALSE
cg19351628	chr12	58246612	58246613	CTDSP2	10106	-5864	CGI	FALSE	FALSE	TRUE
cg19878987	chr12	21810999	21811000	LDHB	3945	-209	CGI-S-Shore	TRUE	FALSE	FALSE
cg20236513	chr12	109162748	109162749	CORO1C	23603	-37452	CGI-S-Shore	FALSE	FALSE	TRUE
cg20249252	chr12	114852308	114852309	TBX5	6910	-6060	CGI	FALSE	FALSE	TRUE
cg20315995	chr12	7280971	7280972	RBP5	83758	493	CGI-N-Shore	TRUE	TRUE	FALSE
cg20408693	chr12	46767289	46767290	SLC38A2	54407	-643	CGI	TRUE	FALSE	FALSE
cg20494738	chr12	124985889	124985890	NCOR2	9612	66119	CGI	FALSE	TRUE	FALSE
cg20640373	chr12	57637437	57637438	NDUFA4L2	56901	-2961	CGI	FALSE	TRUE	FALSE
cg21110337	chr12	113671028	113671029	TPCN1	53373	11767	Non-CGI	FALSE	TRUE	FALSE
cg21449429	chr12	130605112	130605113	FLJ31485	440119	41654	CGI	FALSE	FALSE	TRUE
cg21795074	chr12	129079614	129079615	SLC15A4	121260	228925	Non-CGI	FALSE	TRUE	FALSE
cg21836275	chr12	104235298	104235299	NT5DC3	51559	-322	CGI	TRUE	FALSE	FALSE
cg22229906	chr12	25055421	25055422	BCAT1	586	46970	CGI	TRUE	TRUE	FALSE
cg22376706	chr12	71314612	71314613	PTPRR	5801	-27	CGI-S-Shore	TRUE	FALSE	FALSE
cg22434506	chr12	6657818	6657819	IFFO1	25900	7429	CGI	FALSE	TRUE	FALSE
cg22844229	chr12	58013475	58013476	SLC26A10	65012	-216	CGI	TRUE	FALSE	FALSE
cg22927076	chr12	131849082	131849083	LOC116437	116437	199525	Non-CGI	FALSE	TRUE	FALSE
cg23505823	chr12	123215524	123215525	HCAR1	27198	-394	CGI-S-Shore	TRUE	FALSE	FALSE
cg23588713	chr12	56523270	56523271	ESYT1	23344	1283	CGI-S-Shore	FALSE	TRUE	FALSE
cg24392955	chr12	54454325	54454326	FLJ12825	440101	2286	CGI	FALSE	TRUE	FALSE
cg24502904	chr12	53399544	53399545	EIF4B	1975	-516	CGI-N-Shore	TRUE	FALSE	FALSE
cg25097398	chr12	127650901	127650902	LOC440117	440117	-291664	CGI	FALSE	FALSE	TRUE
cg25313172	chr12	52627272	52627273	KRT7	3855	317	CGI	TRUE	FALSE	FALSE
cg25664021	chr12	57595357	57595358	MIR1228	100302201	7069	CGI-N-Shore	FALSE	TRUE	FALSE
cg25769852	chr12	9914057	9914058	CD69	969	-559	Non-CGI	TRUE	FALSE	FALSE
cg25950278	chr12	49388412	49388413	DDN	23109	4674	CGI-N-Shore	FALSE	FALSE	TRUE
cg26116950	chr12	41582017	41582018	PDZRN4	29951	-231	CGI	TRUE	FALSE	FALSE
cg26415787	chr12	133414334	133414335	GOLGA3	2802	-8907	CGI	FALSE	FALSE	TRUE
cg26435961	chr12	133149563	133149564	LRCOL1	100507055	37472	CGI-S-Shore	FALSE	TRUE	FALSE
cg26527775	chr12	133758599	133758600	ZNF268	10795	51385	CGI-S-Shore	TRUE	TRUE	FALSE
cg26635208	chr12	93985537	93985538	SOCS2-AS1	144481	-19992	CGI-S-Shore	FALSE	FALSE	TRUE
cg26814987	chr12	124773668	124773669	FAM101A	144347	-40	CGI-N-Shore	TRUE	TRUE	FALSE
cg26955987	chr12	3862457	3862458	EFCAB4B	84766	-90	CGI	TRUE	FALSE	FALSE
cg27002516	chr12	111835267	111835268	SH2B3	10019	-8483	CGI-S-Shore	FALSE	FALSE	TRUE
cg27159962	chr12	50419799	50419800	RACGAP1	29127	-491	CGI-S-Shore	TRUE	FALSE	FALSE
cg27483455	chr12	50475360	50475361	SMARCD1	6602	-3621	CGI	FALSE	TRUE	FALSE
cg27505492	chr12	133187045	133187046	LRCOL1	100507055	-7	CGI	TRUE	FALSE	FALSE
cg00204802	chr13	113496682	113496683	MCF2L	23263	-126095	CGI-S-Shore	TRUE	TRUE	FALSE
cg00408315	chr13	114886700	114886701	RASA3	22821	11393	CGI-S-Shore	FALSE	TRUE	FALSE
cg02490942	chr13	113491766	113491767	MCF2L	23263	-131011	CGI	FALSE	TRUE	FALSE
cg02671880	chr13	95355117	95355118	SOX21	11166	9270	CGI	FALSE	FALSE	TRUE
cg03305853	chr13	111525469	111525470	LINC00346	283487	-2813	CGI-N-Shore	FALSE	FALSE	TRUE
cg03844550	chr13	114751235	114751236	RASA3	22821	146858	CGI	FALSE	TRUE	FALSE
cg04494562	chr13	101173774	101173775	GGACT	87769	67270	CGI	FALSE	TRUE	FALSE
cg04579966	chr13	24846221	24846222	C1QTNF9	338872	-37493	Non-CGI	FALSE	TRUE	FALSE
cg04769514	chr13	30088640	30088641	SLC7A1	6541	81183	CGI	FALSE	TRUE	FALSE
cg05092353	chr13	113777013	113777014	F10	2159	-98	CGI-S-Shelf	TRUE	FALSE	FALSE
cg06133910	chr13	34185230	34185231	STARD13	90627	65700	CGI	FALSE	TRUE	FALSE
cg07026882	chr13	113417167	113417168	ATP11A	23250	72523	CGI	FALSE	TRUE	FALSE
cg07037852	chr13	41109565	41109566	LINC00598	646982	-54421	CGI	FALSE	TRUE	FALSE
cg08400494	chr13	111318490	111318491	ING1	3621	-46591	CGI-N-Shore	FALSE	TRUE	FALSE
cg09714458	chr13	113807560	113807561	PROZ	8858	-5406	CGI	FALSE	FALSE	TRUE
cg10124548	chr13	114803738	114803739	RASA3	22821	94355	CGI	FALSE	TRUE	FALSE
cg10527300	chr13	110874326	110874327	COL4A1	1282	85168	Non-CGI	FALSE	TRUE	FALSE
cg11036962	chr13	99004479	99004480	MIR3170	100422881	143700	Non-CGI	FALSE	TRUE	FALSE
cg11244340	chr13	96743583	96743584	HS6ST3	266722	489	CGI	TRUE	FALSE	FALSE
cg11361121	chr13	78272390	78272391	MIR3665	100500861	-138	CGI	TRUE	FALSE	FALSE
cg11997708	chr13	114927854	114927855	RASA3	22821	-29758	CGI	FALSE	FALSE	TRUE
cg12405258	chr13	114927641	114927642	RASA3	22821	-29545	CGI	FALSE	FALSE	TRUE
cg13258563	chr13	36871962	36871963	CCDC169-SOHLH2	100526761	28	CGI	TRUE	FALSE	FALSE
cg13714437	chr13	114889530	114889531	RASA3	22821	8563	CGI	FALSE	TRUE	FALSE
cg14290855	chr13	114887133	114887134	RASA3	22821	10960	CGI	FALSE	TRUE	FALSE
cg14699932	chr13	114748340	114748341	RASA3	22821	149753	CGI	FALSE	TRUE	FALSE
cg14756202	chr13	113529568	113529569	MCF2L	23263	-93209	CGI-S-Shore	FALSE	TRUE	FALSE
cg14929266	chr13	113864086	113864087	CUL4A	8451	999	CGI	TRUE	TRUE	FALSE
cg15495091	chr13	113491819	113491820	MCF2L	23263	-130958	CGI	FALSE	TRUE	FALSE
cg16519487	chr13	20876063	20876064	GJB6	10804	-69528	CGI	FALSE	FALSE	TRUE
cg16555595	chr13	114201796	114201797	TFDP1	7027	-37205	CGI	FALSE	TRUE	FALSE
cg16872841	chr13	110993558	110993559	COL4A2	1284	33926	Non-CGI	FALSE	TRUE	FALSE
cg16919246	chr13	113529737	113529738	MCF2L	23263	-93040	CGI	FALSE	TRUE	FALSE
cg16956132	chr13	45946468	45946469	TPT1-AS1	100190939	30987	CGI-S-Shore	FALSE	TRUE	FALSE
cg16959787	chr13	113584179	113584180	MCF2L	23263	-38598	CGI-N-Shore	FALSE	TRUE	FALSE
cg16962442	chr13	114828455	114828456	RASA3	22821	69638	CGI	FALSE	TRUE	FALSE
cg17121140	chr13	111719003	111719004	ARHGEF7	8874	-48619	CGI	FALSE	FALSE	TRUE
cg17218041	chr13	113365319	113365320	ATP11A	23250	20675	CGI-N-Shore	FALSE	TRUE	FALSE
cg17226324	chr13	113496446	113496447	MCF2L	23263	-126331	CGI	TRUE	TRUE	FALSE
cg17312277	chr13	31306018	31306019	ALOX5AP	241	18402	CGI	FALSE	TRUE	FALSE
cg17495912	chr13	37006340	37006341	CCNA1	8900	682	CGI	TRUE	TRUE	FALSE
cg17672262	chr13	114867701	114867702	RASA3	22821	30392	CGI	FALSE	TRUE	FALSE
cg17775765	chr13	95354021	95354022	SOX21	11166	10366	CGI	FALSE	FALSE	TRUE
cg17919152	chr13	112858755	112858756	SOX1	6656	136841	CGI	FALSE	FALSE	TRUE
cg18030260	chr13	27884819	27884820	RASL11A	387496	40354	CGI-S-Shore	FALSE	FALSE	TRUE
cg18653350	chr13	24007836	24007837	SACS	26278	3	CGI-S-Shore	TRUE	FALSE	FALSE
cg18653560	chr13	113718453	113718454	F7	2155	-41650	CGI	FALSE	TRUE	FALSE
cg19185339	chr13	44971649	44971650	SERP2	387923	23670	Non-CGI	FALSE	TRUE	FALSE
cg19511382	chr13	32983610	32983611	N4BP2L1	90634	18703	CGI-N-Shore	FALSE	TRUE	FALSE
cg19666287	chr13	45945197	45945198	TPT1-AS1	100190939	29716	CGI-N-Shore	FALSE	TRUE	FALSE
cg19928955	chr13	34184932	34184933	STARD13	90627	65998	CGI-N-Shore	FALSE	TRUE	FALSE
cg21448145	chr13	103054752	103054753	FGF14	2259	-627	CGI-S-Shore	TRUE	FALSE	FALSE
cg21786786	chr13	113365464	113365465	ATP11A	23250	20820	CGI	FALSE	TRUE	FALSE
cg22369786	chr13	80911626	80911627	SPRY2	10253	3458	CGI	TRUE	TRUE	FALSE
cg23575603	chr13	50707753	50707754	DLEU2	8847	-8075	CGI	FALSE	TRUE	FALSE
cg23739746	chr13	114905867	114905868	RASA3	22821	-7771	CGI	FALSE	FALSE	TRUE
cg24028634	chr13	113584107	113584108	MCF2L	23263	-38670	CGI-N-Shore	FALSE	TRUE	FALSE
cg24913168	chr13	44971694	44971695	SERP2	387923	23715	Non-CGI	FALSE	TRUE	FALSE
cg24990494	chr13	32520050	32520051	FRY	10129	-85385	Non-CGI	FALSE	TRUE	FALSE
cg26597603	chr13	114056829	114056830	GRTP1	79774	-38365	CGI	FALSE	FALSE	TRUE
cg27518375	chr13	21303448	21303449	IL17D	53342	25965	CGI-N-Shore	TRUE	TRUE	FALSE
cg00687612	chr14	104625920	104625921	KIF26A	26153	20859	CGI	FALSE	TRUE	FALSE
cg00995807	chr14	104172224	104172225	XRCC3	7517	9597	CGI	FALSE	TRUE	FALSE
cg01163842	chr14	95235125	95235126	GSC	145258	1372	CGI	FALSE	TRUE	FALSE
cg01873886	chr14	54419825	54419826	BMP4	652	3727	CGI	FALSE	TRUE	FALSE
cg02098786	chr14	24801794	24801795	ADCY4	196883	2481	CGI	TRUE	TRUE	FALSE
cg02191312	chr14	52734397	52734398	PTGDR	5729	-32	CGI	TRUE	FALSE	FALSE
cg02918593	chr14	105184145	105184146	ADSSL1	122622	-6387	CGI	FALSE	TRUE	FALSE
cg03548062	chr14	101158251	101158252	LINC00523	283601	34645	CGI	FALSE	FALSE	TRUE
cg04141770	chr14	105048339	105048340	C14orf180	400258	2282	Non-CGI	FALSE	TRUE	FALSE
cg04333867	chr14	24567446	24567447	PCK2	5106	3962	CGI-S-Shelf	TRUE	TRUE	FALSE
cg04801085	chr14	103150012	103150013	RCOR1	23186	91015	CGI	FALSE	TRUE	FALSE
cg04847275	chr14	95693828	95693829	DICER1	23405	-69480	Non-CGI	FALSE	TRUE	FALSE
cg04921109	chr14	69952104	69952105	PLEKHD1	400224	632	CGI-S-Shore	FALSE	TRUE	FALSE
cg05050072	chr14	96707554	96707555	BDKRB1	623	-14991	CGI	FALSE	TRUE	FALSE
cg05302386	chr14	52734525	52734526	PTGDR	5729	93	CGI	TRUE	FALSE	FALSE
cg05854694	chr14	61123243	61123244	SIX1	6495	-7087	CGI	FALSE	FALSE	TRUE
cg06776201	chr14	73146496	73146497	DPF3	8110	214311	CGI	FALSE	TRUE	FALSE
cg06785999	chr14	60975964	60975965	SIX6	4990	25	CGI	TRUE	FALSE	FALSE
cg06867623	chr14	100891947	100891948	WDR25	79446	49191	Non-CGI	FALSE	TRUE	FALSE
cg08046044	chr14	54419614	54419615	BMP4	652	3938	CGI-S-Shore	FALSE	TRUE	FALSE
cg08230472	chr14	78083416	78083417	SPTLC2	9517	-305	CGI-S-Shore	TRUE	FALSE	FALSE
cg08266712	chr14	104979372	104979373	C14orf180	400258	-66682	Non-CGI	TRUE	FALSE	FALSE
cg09841842	chr14	51974848	51974849	FRMD6	122786	18992	Non-CGI	FALSE	TRUE	FALSE
cg10059810	chr14	67878690	67878691	PLEK2	26499	136	CGI	FALSE	TRUE	FALSE
cg10422233	chr14	103565915	103565916	EXOC3L4	91828	-564	CGI-N-Shelf	TRUE	FALSE	FALSE
cg10800989	chr14	99786193	99786194	BCL11B	64919	-48370	CGI-N-Shore	FALSE	FALSE	TRUE
cg10858480	chr14	61122774	61122775	SIX1	6495	-6618	CGI	FALSE	FALSE	TRUE
cg11082362	chr14	36003181	36003182	INSM2	84684	-65	CGI	TRUE	FALSE	FALSE
cg11086982	chr14	73736972	73736973	PAPLN	89932	32766	CGI	FALSE	TRUE	FALSE
cg11144753	chr14	103740065	103740066	EIF5	1983	-60426	CGI	FALSE	FALSE	TRUE
cg12100463	chr14	105259826	105259827	AKT1	207	2252	CGI-N-Shore	TRUE	TRUE	FALSE
cg12853633	chr14	57264919	57264920	OTX2	5015	12263	CGI	FALSE	FALSE	TRUE
cg13051728	chr14	68086375	68086376	ARG2	384	-202	CGI	TRUE	FALSE	FALSE
cg13255208	chr14	104165183	104165184	XRCC3	7517	16638	CGI	FALSE	TRUE	FALSE
cg13257690	chr14	101908752	101908753	MIR1247	100302145	118005	CGI	FALSE	FALSE	TRUE
cg13276428	chr14	105048531	105048532	C14orf180	400258	2474	Non-CGI	FALSE	TRUE	FALSE
cg13539545	chr14	60973823	60973824	SIX6	4990	-2113	CGI	FALSE	FALSE	TRUE
cg13775005	chr14	36002441	36002442	INSM2	84684	-805	CGI-N-Shore	TRUE	FALSE	FALSE
cg14022570	chr14	103989629	103989630	CKB	1152	-432	CGI	TRUE	FALSE	FALSE
cg14030882	chr14	61655919	61655920	PRKCH	5583	1631	Non-CGI	FALSE	TRUE	FALSE
cg14171369	chr14	75447688	75447689	EIF2B2	8892	-21922	CGI	FALSE	FALSE	TRUE
cg14307693	chr14	101471511	101471512	SNORD114-31	767612	11937	Non-CGI	FALSE	FALSE	TRUE
cg14906110	chr14	101528288	101528289	MIR377	494326	-97	CGI-S-Shore	TRUE	FALSE	FALSE
cg14920289	chr14	23821149	23821150	SLC22A17	51310	929	CGI	FALSE	TRUE	FALSE
cg15440688	chr14	95237637	95237638	GSC	145258	-1137	CGI	TRUE	FALSE	FALSE
cg16075268	chr14	24779793	24779794	LTB4R2	56413	435	CGI-N-Shore	TRUE	TRUE	FALSE
cg16279084	chr14	93347453	93347454	CHGA	1113	-41990	Non-CGI	FALSE	FALSE	TRUE
cg16403659	chr14	105908693	105908694	MTA1	9112	22506	CGI	FALSE	TRUE	FALSE
cg16503753	chr14	64319245	64319246	SYNE2	23224	-436	CGI	TRUE	FALSE	FALSE
cg16784943	chr14	93415143	93415144	CHGA	1113	25697	CGI-S-Shelf	FALSE	TRUE	FALSE
cg17929687	chr14	52734325	52734326	PTGDR	5729	-104	CGI	TRUE	FALSE	FALSE
cg18535437	chr14	60715218	60715219	PPM1A	5494	2747	CGI	TRUE	TRUE	FALSE
cg18604419	chr14	101513037	101513038	MIR487B	664616	244	CGI	TRUE	FALSE	FALSE
cg18639233	chr14	60975846	60975847	SIX6	4990	-90	CGI	TRUE	FALSE	FALSE
cg18674234	chr14	78107677	78107678	SPTLC2	9517	-24566	CGI-N-Shore	FALSE	FALSE	TRUE
cg19456540	chr14	60976285	60976286	SIX6	4990	346	CGI	TRUE	FALSE	FALSE
cg19506794	chr14	104979611	104979612	C14orf180	400258	-66443	Non-CGI	TRUE	FALSE	FALSE
cg19664185	chr14	105619511	105619512	JAG2	3714	15648	CGI-S-Shore	TRUE	TRUE	FALSE
cg19673233	chr14	104372322	104372323	C14orf2	9556	15579	CGI	FALSE	FALSE	TRUE
cg19706320	chr14	100204528	100204529	EML1	2009	458	Non-CGI	FALSE	TRUE	FALSE
cg19995595	chr14	93415197	93415198	CHGA	1113	25751	CGI-S-Shelf	FALSE	TRUE	FALSE
cg20268279	chr14	52219923	52219924	GNG2	54331	-94027	CGI	FALSE	FALSE	TRUE
cg20475486	chr14	70317075	70317076	SMOC1	64093	-29037	CGI	FALSE	FALSE	TRUE
cg20585530	chr14	60975912	60975913	SIX6	4990	-24	CGI	TRUE	FALSE	FALSE
cg20981086	chr14	101923256	101923257	MIR1247	100302145	103501	CGI	FALSE	FALSE	TRUE
cg21026830	chr14	60973517	60973518	SIX6	4990	-2419	CGI	FALSE	FALSE	TRUE
cg21820652	chr14	104902678	104902679	C14orf180	400258	-143376	Non-CGI	FALSE	FALSE	TRUE
cg22920967	chr14	104047722	104047723	KLC1	3831	18422	CGI-N-Shore	FALSE	TRUE	FALSE
cg23119063	chr14	99506767	99506768	BCL11B	64919	231053	CGI-N-Shore	FALSE	FALSE	TRUE
cg23201907	chr14	104741786	104741787	KIF26A	26153	136725	CGI	FALSE	FALSE	TRUE
cg23302649	chr14	29243690	29243691	C14orf23	387978	1779	CGI	FALSE	TRUE	FALSE
cg23458356	chr14	104568798	104568799	MIR203	406986	-14942	CGI-N-Shore	FALSE	TRUE	FALSE
cg23901592	chr14	90126322	90126323	FOXN3	1112	-40827	Non-CGI	FALSE	FALSE	TRUE
cg23934700	chr14	105126697	105126698	MIR4710	100616300	17387	CGI-S-Shore	FALSE	FALSE	TRUE
cg23998119	chr14	77600217	77600218	ZDHHC22	283576	7915	Non-CGI	FALSE	TRUE	FALSE
cg24127506	chr14	102050490	102050491	DIO3	1735	22801	CGI-N-Shore	FALSE	FALSE	TRUE
cg24755931	chr14	103407195	103407196	AMN	81693	18201	CGI-S-Shore	FALSE	TRUE	FALSE
cg25034766	chr14	75747332	75747333	FOS	2353	1850	CGI-S-Shore	FALSE	TRUE	FALSE
cg26967100	chr14	61104032	61104033	SIX1	6495	12121	CGI	FALSE	FALSE	TRUE
cg27170268	chr14	104171695	104171696	XRCC3	7517	10126	CGI	FALSE	TRUE	FALSE
cg27663123	chr14	91853682	91853683	CCDC88C	440193	30504	Non-CGI	FALSE	TRUE	FALSE
cg00032912	chr15	96887529	96887530	MIR1469	100302258	11038	CGI	FALSE	FALSE	TRUE
cg00870269	chr15	58782688	58782689	LIPC	3990	79912	CGI	FALSE	TRUE	FALSE
cg01176433	chr15	69754714	69754715	LOC145837	145837	-730	CGI	TRUE	FALSE	FALSE
cg01178680	chr15	74425552	74425553	ISLR2	57611	3836	CGI	TRUE	TRUE	FALSE
cg01837657	chr15	90039822	90039823	RHCG	51458	-22	CGI	TRUE	FALSE	FALSE
cg01950845	chr15	93632730	93632731	RGMA	56963	-286	CGI	TRUE	FALSE	FALSE
cg02010763	chr15	61044829	61044830	NARG2	79664	-273484	Non-CGI	FALSE	TRUE	FALSE
cg02326806	chr15	96887461	96887462	MIR1469	100302258	10970	CGI	FALSE	FALSE	TRUE
cg02607059	chr15	101632053	101632054	CHSY1	22856	160082	CGI-S-Shelf	FALSE	FALSE	TRUE
cg03479535	chr15	100889701	100889702	FLJ42289	388182	1220	CGI	TRUE	TRUE	FALSE
cg04861869	chr15	101728611	101728612	CHSY1	22856	63524	CGI-N-Shore	TRUE	TRUE	FALSE
cg05335955	chr15	83349264	83349265	AP3B2	8120	29369	CGI	TRUE	TRUE	FALSE
cg05417162	chr15	89959854	89959855	LOC254559	254559	48523	CGI	FALSE	FALSE	TRUE
cg07057579	chr15	95870112	95870113	LOC400456	400456	215	CGI	TRUE	FALSE	FALSE
cg07297039	chr15	74467626	74467627	ISLR	3671	1538	CGI	TRUE	TRUE	FALSE
cg07517944	chr15	51633816	51633817	GLDN	342035	102	CGI	TRUE	FALSE	FALSE
cg09495418	chr15	51634039	51634040	GLDN	342035	325	CGI	TRUE	FALSE	FALSE
cg09792204	chr15	28342183	28342184	OCA2	4948	2273	CGI	FALSE	TRUE	FALSE
cg10186131	chr15	96887560	96887561	MIR1469	100302258	11069	CGI	FALSE	FALSE	TRUE
cg10207553	chr15	65277977	65277978	SPG21	51324	4272	CGI-N-Shelf	FALSE	TRUE	FALSE
cg10310111	chr15	101200370	101200371	ASB7	140460	57614	CGI	FALSE	FALSE	TRUE
cg10495084	chr15	96889416	96889417	MIR1469	100302258	12925	CGI	FALSE	FALSE	TRUE
cg11332236	chr15	90039818	90039819	RHCG	51458	-18	CGI	TRUE	FALSE	FALSE
cg12017911	chr15	74421887	74421888	ISLR2	57611	171	CGI	TRUE	FALSE	FALSE
cg12309653	chr15	37170454	37170455	LOC145845	145845	8278	CGI	FALSE	TRUE	FALSE
cg12379383	chr15	96896940	96896941	MIR1469	100302258	20449	CGI	FALSE	FALSE	TRUE
cg12655112	chr15	42261154	42261155	EHD4	30844	3599	CGI-N-Shelf	FALSE	TRUE	FALSE
cg13166748	chr15	28437159	28437160	OCA2	4948	-92700	Non-CGI	FALSE	TRUE	FALSE
cg13373318	chr15	65686654	65686655	IGDCC3	9543	-16275	CGI-N-Shore	FALSE	TRUE	FALSE
cg14164908	chr15	65689433	65689434	IGDCC3	9543	-19054	CGI-S-Shore	TRUE	TRUE	FALSE
cg14397171	chr15	101728653	101728654	CHSY1	22856	63482	CGI-N-Shore	TRUE	TRUE	FALSE
cg16086559	chr15	96911531	96911532	MIR1469	100302258	35040	CGI	FALSE	FALSE	TRUE
cg16214653	chr15	100048500	100048501	MEF2A	4205	-57631	Non-CGI	FALSE	FALSE	TRUE
cg16275295	chr15	101661984	101661985	CHSY1	22856	130151	CGI	FALSE	FALSE	TRUE
cg16926502	chr15	74467709	74467710	ISLR	3671	1621	CGI	TRUE	TRUE	FALSE
cg17453840	chr15	83317526	83317527	CPEB1	64506	-797	CGI-S-Shore	TRUE	FALSE	FALSE
cg18076399	chr15	25423404	25423405	SNORD115-5	100033442	-479	Non-CGI	TRUE	TRUE	FALSE
cg18560204	chr15	83953709	83953710	BNC1	646	-240	CGI	TRUE	FALSE	FALSE
cg19461383	chr15	69325362	69325363	LINC00277	283673	-39902	CGI	FALSE	TRUE	FALSE
cg19993316	chr15	69452462	69452463	GLCE	26035	-509	CGI-N-Shore	TRUE	TRUE	FALSE
cg20314548	chr15	74426273	74426274	ISLR2	57611	4557	CGI	TRUE	TRUE	FALSE
cg20315346	chr15	41523051	41523052	EXD1	161829	-155	CGI	TRUE	FALSE	FALSE
cg20696050	chr15	25963402	25963403	MIR4715	100616474	130568	CGI-N-Shore	FALSE	TRUE	FALSE
cg20703122	chr15	28339563	28339564	OCA2	4948	4893	CGI-N-Shore	FALSE	TRUE	FALSE
cg20792895	chr15	23810334	23810335	MKRN3	7681	-118	CGI-N-Shore	TRUE	FALSE	FALSE
cg20855160	chr15	22798986	22798987	TUBGCP5	114791	-34407	CGI	TRUE	FALSE	FALSE
cg21074766	chr15	99069077	99069078	FAM169B	283777	-11465	Non-CGI	FALSE	FALSE	TRUE
cg21862903	chr15	40734369	40734370	BAHD1	22893	2448	CGI	FALSE	TRUE	FALSE
cg21935536	chr15	90338183	90338184	ANPEP	290	19887	Non-CGI	FALSE	TRUE	FALSE
cg22178798	chr15	96890626	96890627	MIR1469	100302258	14135	CGI-S-Shore	FALSE	FALSE	TRUE
cg22263434	chr15	90171846	90171847	KIF7	374654	26834	CGI	FALSE	TRUE	FALSE
cg22452230	chr15	69754698	69754699	LOC145837	145837	-746	CGI	TRUE	FALSE	FALSE
cg22459630	chr15	68121028	68121029	SKOR1	390598	3086	CGI	FALSE	TRUE	FALSE
cg22840361	chr15	96887919	96887920	MIR1469	100302258	11428	CGI	FALSE	FALSE	TRUE
cg23731272	chr15	67356838	67356839	SMAD3	4088	-1355	CGI	TRUE	FALSE	FALSE
cg23742887	chr15	34629998	34629999	SLC12A6	9990	265	CGI	TRUE	TRUE	FALSE
cg24625084	chr15	90171885	90171886	KIF7	374654	26795	CGI	FALSE	TRUE	FALSE
cg24654177	chr15	58791257	58791258	LIPC	3990	88481	Non-CGI	TRUE	TRUE	FALSE
cg24660635	chr15	28437148	28437149	OCA2	4948	-92689	Non-CGI	FALSE	TRUE	FALSE
cg24738311	chr15	89952632	89952633	LOC254559	254559	41301	CGI	FALSE	FALSE	TRUE
cg25356006	chr15	72472792	72472793	GRAMD2	196996	17342	CGI-N-Shelf	FALSE	TRUE	FALSE
cg25632853	chr15	73088954	73088955	ADPGK	83440	-12827	CGI	FALSE	TRUE	FALSE
cg25638626	chr15	68117903	68117904	SKOR1	390598	-36	CGI	TRUE	FALSE	FALSE
cg26590799	chr15	26915257	26915258	GABRA5	2558	-196607	CGI-N-Shore	FALSE	TRUE	FALSE
cg27177196	chr15	62654592	62654593	C2CD4B	388125	-197109	Non-CGI	FALSE	FALSE	TRUE
cg27501645	chr15	41795087	41795088	ITPKA	3706	9030	CGI	FALSE	TRUE	FALSE
cg27552679	chr15	74425757	74425758	ISLR2	57611	4041	CGI	TRUE	TRUE	FALSE
cg27578811	chr15	83316223	83316224	CPEB1	64506	503	CGI	TRUE	TRUE	FALSE
cg00239353	chr16	3115133	3115134	IL32	9235	-178	Non-CGI	TRUE	FALSE	FALSE
cg00333843	chr16	79627884	79627885	MAF	4094	6736	Non-CGI	TRUE	TRUE	FALSE
cg00525828	chr16	88094415	88094416	BANP	54971	110176	CGI	FALSE	TRUE	FALSE
cg00664609	chr16	2198075	2198076	RAB26	25837	-68	CGI-N-Shore	TRUE	FALSE	FALSE
cg00770784	chr16	75468297	75468298	CFDP1	10428	-909	CGI	TRUE	FALSE	FALSE
cg00806214	chr16	521912	521913	RAB11FIP3	9727	46243	CGI-N-Shore	FALSE	TRUE	FALSE
cg00808935	chr16	85215140	85215141	LOC400548	400548	44383	CGI-N-Shore	FALSE	FALSE	TRUE
cg00809164	chr16	56651049	56651050	MT1M	4499	-322	CGI	TRUE	TRUE	FALSE
cg00870837	chr16	1171361	1171362	C1QTNF8	390664	-25116	CGI	FALSE	FALSE	TRUE
cg00898447	chr16	75300795	75300796	BCAR1	9564	1154	CGI-S-Shore	TRUE	TRUE	FALSE
cg00928596	chr16	14403022	14403023	MIR365A	100126355	-118	Non-CGI	TRUE	FALSE	FALSE
cg00962254	chr16	678050	678051	WFIKKN1	117166	-2960	CGI	TRUE	TRUE	FALSE
cg01047631	chr16	54972573	54972574	IRX5	10265	7461	CGI	FALSE	FALSE	TRUE
cg01063579	chr16	86715152	86715153	FOXL1	2300	103036	CGI	FALSE	FALSE	TRUE
cg01095004	chr16	88454883	88454884	ZNF469	84627	-38994	CGI-S-Shore	FALSE	FALSE	TRUE
cg01147352	chr16	86767299	86767300	FOXL1	2300	155183	CGI	FALSE	FALSE	TRUE
cg01207684	chr16	4103167	4103168	ADCY9	115	63017	CGI	FALSE	TRUE	FALSE
cg01222216	chr16	2648276	2648277	LOC652276	652276	-5107	CGI-S-Shore	FALSE	TRUE	FALSE
cg01231543	chr16	68741748	68741749	CDH1	999	-29445	Non-CGI	FALSE	FALSE	TRUE
cg01269537	chr16	70415514	70415515	LOC100506083	100506083	-34863	CGI	FALSE	TRUE	FALSE
cg01692978	chr16	86860774	86860775	FOXL1	2300	248658	CGI-N-Shore	FALSE	FALSE	TRUE
cg01699600	chr16	88844726	88844727	PIEZO1	9780	6644	CGI-S-Shore	FALSE	TRUE	FALSE
cg01852063	chr16	1500567	1500568	CCDC154	645811	-6076	CGI	TRUE	TRUE	FALSE
cg01929285	chr16	368761	368762	LUC7L	55692	16803	CGI	FALSE	TRUE	FALSE
cg02000882	chr16	86542113	86542114	FENDRR	400550	351	CGI	FALSE	TRUE	FALSE
cg02032299	chr16	87541244	87541245	ZCCHC14	23174	-15783	CGI-N-Shore	FALSE	TRUE	FALSE
cg02043105	chr16	28877659	28877660	ATP2A1	487	-12148	CGI	TRUE	TRUE	FALSE
cg02059315	chr16	3989432	3989433	CREBBP	1387	-59310	CGI	FALSE	FALSE	TRUE
cg02067405	chr16	23193658	23193659	SCNN1G	6340	-380	CGI-N-Shore	TRUE	FALSE	FALSE
cg02187214	chr16	86599468	86599469	FOXC2	2303	-1387	CGI	TRUE	FALSE	FALSE
cg02202742	chr16	3695595	3695596	DNASE1	1773	-7343	Non-CGI	FALSE	FALSE	TRUE
cg02242345	chr16	66938788	66938789	CDH16	1014	14097	Non-CGI	FALSE	FALSE	TRUE
cg02449821	chr16	89641296	89641297	CPNE7	27132	-878	CGI	TRUE	FALSE	FALSE
cg02512202	chr16	2653250	2653251	LOC652276	652276	-133	CGI	TRUE	FALSE	FALSE
cg02533339	chr16	14403040	14403041	MIR365A	100126355	-100	Non-CGI	TRUE	FALSE	FALSE
cg02586198	chr16	29820119	29820120	MAZ	4150	2691	CGI	TRUE	TRUE	FALSE
cg02692912	chr16	24267226	24267227	CACNG3	10368	351	CGI	TRUE	FALSE	FALSE
cg02741882	chr16	29888096	29888097	LOC440356	440356	13091	CGI	FALSE	TRUE	FALSE
cg02765085	chr16	4003782	4003783	CREBBP	1387	-73660	CGI	FALSE	FALSE	TRUE
cg02803037	chr16	56702158	56702159	MT1G	4495	-180	CGI	TRUE	FALSE	FALSE
cg02830202	chr16	86953383	86953384	FOXL1	2300	341267	CGI	FALSE	FALSE	TRUE
cg03158310	chr16	2086235	2086236	SLC9A3R2	9351	9365	CGI	FALSE	TRUE	FALSE
cg03190266	chr16	86602533	86602534	FOXC2	2303	1675	CGI	TRUE	FALSE	FALSE
cg03314029	chr16	88496788	88496789	ZNF469	84627	2908	CGI	TRUE	FALSE	FALSE
cg03314158	chr16	2653280	2653281	LOC652276	652276	-103	CGI	TRUE	FALSE	FALSE
cg03346415	chr16	69854895	69854896	WWP2	11060	58620	Non-CGI	FALSE	TRUE	FALSE
cg03362815	chr16	50407774	50407775	BRD7	29117	-4928	Non-CGI	FALSE	FALSE	TRUE
cg03475660	chr16	75590309	75590310	TMEM231	79583	-138	CGI	TRUE	FALSE	FALSE
cg03699307	chr16	75600014	75600015	GABARAPL2	11345	-233	CGI	TRUE	FALSE	FALSE
cg03931865	chr16	47048107	47048108	DNAJA2	10294	-40481	CGI	FALSE	FALSE	TRUE
cg03981906	chr16	2732514	2732515	KCTD5	54442	18	CGI	TRUE	FALSE	FALSE
cg03983270	chr16	81731249	81731250	LOC100129617	100129617	32289	CGI	FALSE	TRUE	FALSE
cg04035353	chr16	89335133	89335134	ZNF778	197320	51021	CGI	FALSE	TRUE	FALSE
cg04265926	chr16	67694969	67694970	PARD6A	50855	117	CGI	TRUE	FALSE	FALSE
cg04287289	chr16	89883240	89883241	FANCA	2175	-174	CGI	TRUE	FALSE	FALSE
cg04317962	chr16	79623625	79623626	MAF	4094	10995	CGI	FALSE	FALSE	TRUE
cg04723449	chr16	23420567	23420568	COG7	91949	43943	CGI-S-Shore	FALSE	TRUE	FALSE
cg04906242	chr16	75150880	75150881	LDHD	197257	-209	CGI-S-Shore	TRUE	FALSE	FALSE
cg04946910	chr16	3243392	3243393	OR1F1	4992	-10853	CGI	TRUE	FALSE	FALSE
cg05057452	chr16	214970	214971	HBM	3042	-1001	CGI	TRUE	FALSE	FALSE
cg05110241	chr16	68378359	68378360	PRMT7	54496	33481	Non-CGI	FALSE	TRUE	FALSE
cg05383931	chr16	84336130	84336131	WFDC1	58189	7728	CGI	FALSE	TRUE	FALSE
cg05457730	chr16	86795490	86795491	FOXL1	2300	183374	CGI	FALSE	FALSE	TRUE
cg05540639	chr16	85352976	85352977	LOC727710	727710	-15973	CGI	FALSE	FALSE	TRUE
cg05565277	chr16	2502146	2502147	C16orf59	80178	-7967	CGI-S-Shore	FALSE	TRUE	FALSE
cg05599155	chr16	29188654	29188655	RRN3P2	653390	102490	CGI	FALSE	TRUE	FALSE
cg05813818	chr16	875966	875967	PRR25	388199	20522	CGI	FALSE	FALSE	TRUE
cg05955675	chr16	85206653	85206654	LOC400548	400548	35896	CGI-S-Shore	FALSE	FALSE	TRUE
cg06044662	chr16	30386144	30386145	MYLPF	29895	20	CGI-S-Shelf	TRUE	FALSE	FALSE
cg06088745	chr16	54317413	54317414	IRX3	79191	2963	CGI-S-Shore	FALSE	TRUE	FALSE
cg06099697	chr16	88539861	88539862	ZFPM1	161882	19846	CGI-S-Shore	FALSE	TRUE	FALSE
cg06110458	chr16	85256305	85256306	LINC00311	197196	-60257	CGI	FALSE	FALSE	TRUE
cg06349450	chr16	85867170	85867171	COX4I1	1327	33996	Non-CGI	FALSE	FALSE	TRUE
cg06505619	chr16	698072	698073	WDR90	197335	-1289	CGI-S-Shore	TRUE	TRUE	FALSE
cg06878649	chr16	84336112	84336113	WFDC1	58189	7710	CGI	FALSE	TRUE	FALSE
cg06916001	chr16	14403004	14403005	MIR365A	100126355	-136	Non-CGI	TRUE	FALSE	FALSE
cg06991955	chr16	2114232	2114233	TSC2	7249	16241	CGI	FALSE	TRUE	FALSE
cg07141215	chr16	4308070	4308071	LOC100507501	100507501	-4279	CGI	FALSE	TRUE	FALSE
cg07153665	chr16	66613206	66613207	CMTM2	146225	-143	CGI	TRUE	FALSE	FALSE
cg07230359	chr16	86466427	86466428	FENDRR	400550	76037	CGI	FALSE	FALSE	TRUE
cg07254066	chr16	54965895	54965896	IRX5	10265	783	CGI	TRUE	TRUE	FALSE
cg07294652	chr16	1370341	1370342	UBE2I	7329	11186	CGI	FALSE	TRUE	FALSE
cg07397579	chr16	88459662	88459663	ZNF469	84627	-34215	CGI	FALSE	FALSE	TRUE
cg07455504	chr16	1080144	1080145	SSTR5	6755	-42610	CGI-S-Shore	FALSE	FALSE	TRUE
cg07484910	chr16	84228377	84228378	ADAD2	161931	3653	CGI	FALSE	TRUE	FALSE
cg07598385	chr16	88566483	88566484	ZFPM1	161882	46468	CGI-S-Shore	FALSE	TRUE	FALSE
cg07613994	chr16	89634715	89634716	SNORD68	606500	6876	CGI-S-Shore	FALSE	FALSE	TRUE
cg07635227	chr16	4714815	4714816	NUDT16L1	84309	-28877	CGI-S-Shore	FALSE	TRUE	FALSE
cg07838270	chr16	86861522	86861523	FOXL1	2300	249406	CGI	FALSE	FALSE	TRUE
cg08322289	chr16	4525918	4525919	NMRAL1	57407	-1021	CGI-S-Shore	TRUE	TRUE	FALSE
cg08454455	chr16	54972371	54972372	IRX5	10265	7259	CGI	FALSE	FALSE	TRUE
cg08549241	chr16	89440133	89440134	LOC100287036	100287036	52591	CGI	FALSE	TRUE	FALSE
cg08587397	chr16	672930	672931	WFIKKN1	117166	-8080	CGI	FALSE	TRUE	FALSE
cg08595667	chr16	89445453	89445454	LOC100287036	100287036	57911	CGI-S-Shelf	FALSE	TRUE	FALSE
cg08645670	chr16	86612451	86612452	FOXL1	2300	335	CGI	TRUE	FALSE	FALSE
cg08732659	chr16	54973966	54973967	IRX5	10265	8854	CGI	FALSE	FALSE	TRUE
cg08806779	chr16	86965605	86965606	FOXL1	2300	353489	CGI	FALSE	FALSE	TRUE
cg08855903	chr16	2121747	2121748	MIR1225	100188847	18536	CGI-S-Shore	FALSE	TRUE	FALSE
cg08921185	chr16	2285536	2285537	DNASE1L2	1775	-886	CGI	TRUE	TRUE	FALSE
cg09012633	chr16	90114173	90114174	LOC100130015	100130015	16	CGI	TRUE	FALSE	FALSE
cg09275704	chr16	54317042	54317043	IRX3	79191	3334	CGI	FALSE	FALSE	TRUE
cg09286183	chr16	2042466	2042467	SYNGR3	9143	2519	CGI	FALSE	TRUE	FALSE
cg09364677	chr16	88480701	88480702	ZNF469	84627	-13176	CGI-S-Shore	FALSE	FALSE	TRUE
cg09407223	chr16	67302039	67302040	PLEKHG4	25894	-9372	Non-CGI	FALSE	TRUE	FALSE
cg09462089	chr16	58329456	58329457	PRSS54	221191	-504	Non-CGI	TRUE	FALSE	FALSE
cg09538603	chr16	11219986	11219987	RMI2	116028	-123518	Non-CGI	TRUE	TRUE	FALSE
cg09583024	chr16	67682005	67682006	RLTPR	146206	2974	CGI	FALSE	TRUE	FALSE
cg09602020	chr16	29188796	29188797	RRN3P2	653390	102632	CGI	FALSE	TRUE	FALSE
cg09615056	chr16	1478718	1478719	C16orf91	283951	625	CGI	FALSE	TRUE	FALSE
cg09615821	chr16	70749564	70749565	MTSS1L	92154	-29609	Non-CGI	FALSE	TRUE	FALSE
cg09660145	chr16	3018104	3018105	PAQR4	124222	-1236	CGI	TRUE	TRUE	FALSE
cg09681286	chr16	2334256	2334257	MIR4717	100616241	9634	CGI-N-Shore	FALSE	TRUE	FALSE
cg09787254	chr16	74808678	74808679	FA2H	79152	49	CGI	TRUE	FALSE	FALSE
cg09791621	chr16	1078722	1078723	SSTR5	6755	-44032	CGI	FALSE	FALSE	TRUE
cg09835421	chr16	68378352	68378353	PRMT7	54496	33474	Non-CGI	FALSE	TRUE	FALSE
cg10174683	chr16	85619974	85619975	GSE1	23199	-25053	CGI-S-Shore	FALSE	FALSE	TRUE
cg10177032	chr16	4103492	4103493	ADCY9	115	62692	CGI-S-Shore	FALSE	TRUE	FALSE
cg10272731	chr16	85614015	85614016	GSE1	23199	-31012	Non-CGI	FALSE	FALSE	TRUE
cg10332116	chr16	86795398	86795399	FOXL1	2300	183282	CGI	FALSE	FALSE	TRUE
cg10510742	chr16	30620917	30620918	ZNF689	115509	763	CGI	TRUE	TRUE	FALSE
cg16376627	chr16	89768522	89768523	SPATA2L	124044	-400	CGI	TRUE	FALSE	FALSE
cg16418105	chr16	876216	876217	PRR25	388199	20772	CGI	FALSE	FALSE	TRUE
cg16699861	chr16	30429204	30429205	ZNF771	51333	10468	CGI	FALSE	TRUE	FALSE
cg16727774	chr16	87958281	87958282	CA5A	763	11829	CGI-N-Shore	FALSE	TRUE	FALSE
cg16750777	chr16	50583441	50583442	NKD1	85407	1199	CGI-S-Shore	FALSE	TRUE	FALSE
cg16783204	chr16	89119371	89119372	ACSF3	197322	-40844	CGI	TRUE	FALSE	FALSE
cg16791016	chr16	85354618	85354619	LOC727710	727710	-17615	CGI-S-Shore	FALSE	FALSE	TRUE
cg18578405	chr16	12996057	12996058	SHISA9	729993	579	CGI	TRUE	FALSE	FALSE
cg19118262	chr16	69364643	69364644	PDF	64146	-144	CGI	TRUE	TRUE	FALSE
cg26470314	chr16	2039411	2039412	SYNGR3	9143	-533	CGI-N-Shore	TRUE	TRUE	FALSE
cg26559829	chr16	85206155	85206156	LOC400548	400548	35398	CGI	FALSE	FALSE	TRUE
cg26709988	chr16	84860918	84860919	CRISPLD2	83716	7330	CGI	FALSE	TRUE	FALSE
cg26736200	chr16	69951706	69951707	MIR140	406932	-15276	CGI-N-Shore	TRUE	TRUE	FALSE
cg26757376	chr16	2502116	2502117	C16orf59	80178	-7997	CGI-S-Shore	FALSE	TRUE	FALSE
cg26996656	chr16	880371	880372	PRR25	388199	24927	CGI	FALSE	FALSE	TRUE
cg27099358	chr16	1118909	1118910	SSTR5	6755	-3845	CGI-S-Shore	FALSE	TRUE	FALSE
cg27154941	chr16	84346910	84346911	WFDC1	58189	18508	CGI-S-Shore	FALSE	TRUE	FALSE
cg27179111	chr16	3627489	3627490	NLRC3	197358	-96	Non-CGI	TRUE	FALSE	FALSE
cg27309702	chr16	57792310	57792311	KATNB1	10300	22649	Non-CGI	FALSE	TRUE	FALSE
cg27391627	chr16	86704130	86704131	FOXL1	2300	92014	CGI	FALSE	FALSE	TRUE
cg27494164	chr16	87022483	87022484	C16orf95	100506581	328541	CGI	FALSE	FALSE	TRUE
cg27499105	chr16	86337823	86337824	LOC146513	146513	17785	CGI	FALSE	FALSE	TRUE
cg27570984	chr16	55125644	55125645	IRX5	10265	160532	Non-CGI	FALSE	FALSE	TRUE
cg27602981	chr16	89385820	89385821	LOC100287036	100287036	-1719	CGI-S-Shore	TRUE	TRUE	FALSE
cg27608563	chr16	81518041	81518042	CMIP	80790	39265	CGI	FALSE	TRUE	FALSE
cg00548708	chr17	48041547	48041548	DLX4	1748	-5013	CGI	FALSE	FALSE	TRUE
cg00691266	chr17	74015089	74015090	EVPL	2125	8416	CGI-S-Shelf	TRUE	TRUE	FALSE
cg00911794	chr17	1962132	1962133	HIC1	3090	4683	CGI	FALSE	TRUE	FALSE
cg01231183	chr17	79924542	79924543	NOTUM	147111	-5484	CGI	FALSE	FALSE	TRUE
cg01362515	chr17	39782091	39782092	KRT17	3872	-1208	Non-CGI	TRUE	TRUE	FALSE
cg01438365	chr17	59480470	59480471	TBX2	6909	3212	CGI-S-Shore	FALSE	TRUE	FALSE
cg01449677	chr17	76794888	76794889	CYTH1	9267	-16511	CGI	FALSE	TRUE	FALSE
cg01890836	chr17	17055584	17055585	FLCN	201163	84916	Non-CGI	FALSE	TRUE	FALSE
cg01977863	chr17	79167836	79167837	AATK	9625	-27963	CGI	TRUE	TRUE	FALSE
cg02022491	chr17	2323612	2323613	LOC284009	284009	-4881	CGI-N-Shore	FALSE	TRUE	FALSE
cg02090762	chr17	79503859	79503860	FSCN2	25794	8441	CGI	FALSE	TRUE	FALSE
cg02132714	chr17	46656690	46656691	MIR10A	406902	617	CGI	TRUE	TRUE	FALSE
cg02159489	chr17	79459563	79459564	ACTG1	71	20327	CGI-S-Shelf	FALSE	FALSE	TRUE
cg02236651	chr17	61777871	61777872	LIMD2	80774	172	CGI	TRUE	FALSE	FALSE
cg02238387	chr17	77964734	77964735	TBC1D16	125058	44911	CGI	FALSE	TRUE	FALSE
cg02262633	chr17	805469	805470	NXN	64359	77527	CGI-N-Shore	FALSE	TRUE	FALSE
cg02317299	chr17	1390182	1390183	MYO1C	4641	5817	CGI-S-Shore	TRUE	TRUE	FALSE
cg02407342	chr17	42988784	42988785	GFAP	2670	4134	CGI	FALSE	TRUE	FALSE
cg02497558	chr17	46608570	46608571	HOXB1	3211	-297	CGI-S-Shore	TRUE	FALSE	FALSE
cg02505674	chr17	34093892	34093893	C17orf50	146853	5975	CGI-S-Shore	FALSE	TRUE	FALSE
cg02647835	chr17	79952861	79952862	ASPSCR1	79058	17434	CGI	FALSE	TRUE	FALSE
cg02749463	chr17	46646359	46646360	HOXB4	3214	9382	CGI-S-Shore	FALSE	TRUE	FALSE
cg02806739	chr17	80273242	80273243	CD7	924	2236	CGI-S-Shore	FALSE	TRUE	FALSE
cg02864619	chr17	78933961	78933962	CHMP6	79643	-31678	CGI-N-Shore	FALSE	TRUE	FALSE
cg02965290	chr17	38108850	38108851	GSDMA	284110	-10374	CGI	FALSE	FALSE	TRUE
cg03049249	chr17	16593601	16593602	CCDC144A	9720	-36	CGI	TRUE	FALSE	FALSE
cg03069736	chr17	72542117	72542118	CD300C	10871	163	Non-CGI	TRUE	FALSE	FALSE
cg03255749	chr17	739405	739406	GLOD4	51031	-53833	CGI-S-Shore	FALSE	TRUE	FALSE
cg03840467	chr17	75278162	75278163	2009-09-01	10801	669	CGI	FALSE	TRUE	FALSE
cg03929677	chr17	80763460	80763461	ZNF750	79755	34469	CGI	FALSE	TRUE	FALSE
cg03936721	chr17	42386419	42386420	RUNDC3A	10900	491	CGI-S-Shore	TRUE	TRUE	FALSE
cg03989711	chr17	80970799	80970800	B3GNTL1	146712	38885	CGI-S-Shore	FALSE	TRUE	FALSE
cg04029455	chr17	80745235	80745236	TBCD	6904	35294	CGI	FALSE	TRUE	FALSE
cg04154281	chr17	42289838	42289839	UBTF	7343	9154	CGI-S-Shore	FALSE	TRUE	FALSE
cg04245057	chr17	59478450	59478451	TBX2	6909	1192	CGI	FALSE	TRUE	FALSE
cg04262140	chr17	46827626	46827627	HOXB13	10481	-21514	CGI	FALSE	FALSE	TRUE
cg04316233	chr17	16593613	16593614	CCDC144A	9720	-24	CGI	TRUE	FALSE	FALSE
cg04548336	chr17	75282102	75282103	2009-09-01	10801	4609	CGI-S-Shelf	TRUE	TRUE	FALSE
cg04701937	chr17	78992246	78992247	BAIAP2-AS1	440465	16271	CGI	FALSE	FALSE	TRUE
cg04817870	chr17	79963651	79963652	STRA13	201254	17120	CGI-S-Shore	FALSE	TRUE	FALSE
cg05044743	chr17	45929657	45929658	SP6	80320	3581	CGI	TRUE	TRUE	FALSE
cg05347965	chr17	55663256	55663257	MRPS23	51649	264175	Non-CGI	FALSE	TRUE	FALSE
cg05396212	chr17	39683705	39683706	KRT19	3880	934	CGI	FALSE	TRUE	FALSE
cg05633070	chr17	933118	933119	MIR3183	100422835	-7318	CGI	FALSE	TRUE	FALSE
cg05651778	chr17	60729731	60729732	MRC2	9902	24968	CGI	FALSE	TRUE	FALSE
[truncated: 11,808 more rows]
