# Supplementary material for: H3K4me1 marks DNA regions hypomethylated during aging in human stem and differentiated cells
Source: HighWire-hosted journal article supplement (doi:10.1101/gr.169011.113), 2014-09-30
Supplement: Supplemental_Table_10.xlsx [file Supplemental_Table_10.xlsx]

## Sheet: ST10
Supplemental Table 10: List of CpG sites identified in MSCs that showed low interindividual variability in both young and old individuals (LV)
Target ID	Chromosome	start	end	nearest.gene	nearest.gene.id	disttotss	hmm.cpgi	prom.reg	intra.reg	inter.reg
cg00002028	chr1	20960010	20960011	PINK1	65018	61	CGI	TRUE	FALSE	FALSE
cg00008647	chr1	207082900	207082901	IL24	11009	12111	CGI	FALSE	TRUE	FALSE
cg00009292	chr1	50882082	50882083	DMRTA2	63950	7035	CGI	FALSE	FALSE	TRUE
cg00021576	chr1	244211966	244211967	ZBTB18	10472	-2593	CGI	FALSE	FALSE	TRUE
cg00023492	chr1	19970710	19970711	NBL1	4681	986	CGI	TRUE	TRUE	FALSE
cg00031456	chr1	109234919	109234920	PRPF38B	55119	-11	CGI	TRUE	FALSE	FALSE
cg00035249	chr1	228270481	228270482	ARF1	375	119	CGI	TRUE	TRUE	FALSE
cg00040367	chr1	169337476	169337477	BLZF1	8548	281	CGI	TRUE	FALSE	FALSE
cg00042356	chr1	8021962	8021963	PARK7	11315	247	CGI	FALSE	TRUE	FALSE
cg00046018	chr1	202318086	202318087	PPP1R12B	4660	255	CGI	TRUE	FALSE	FALSE
cg00049400	chr1	119575742	119575743	TBX15	6913	-43562	Non-CGI	FALSE	TRUE	FALSE
cg00049718	chr1	115300559	115300560	CSDE1	7812	110	CGI	TRUE	FALSE	FALSE
cg00066671	chr1	102462590	102462591	OLFM3	118427	198	CGI	TRUE	FALSE	FALSE
cg00082497	chr1	32802133	32802134	MARCKSL1	65108	-298	CGI	TRUE	FALSE	FALSE
cg00085403	chr1	144932207	144932208	LOC653513	653513	107783	CGI	TRUE	TRUE	FALSE
cg00090103	chr1	155920763	155920764	RXFP4	339403	9282	CGI	TRUE	TRUE	FALSE
cg00091162	chr1	167906284	167906285	MPC2	25874	21	CGI	TRUE	TRUE	FALSE
cg00091285	chr1	98511031	98511032	MIR2682	100616452	-123	CGI	TRUE	TRUE	FALSE
cg00093900	chr1	204381012	204381013	PPP1R15B	84919	-67	CGI	TRUE	FALSE	FALSE
cg00097626	chr1	205782249	205782250	SLC41A1	254428	-87	CGI	TRUE	FALSE	FALSE
cg00099216	chr1	33430567	33430568	RNF19B	127544	-280	CGI	TRUE	FALSE	FALSE
cg00101986	chr1	25071756	25071757	CLIC4	25932	-2	CGI	TRUE	FALSE	FALSE
cg00102714	chr1	207925343	207925344	CD46	4179	-38	CGI	TRUE	FALSE	FALSE
cg00151676	chr1	1525452	1525453	C1orf233	643988	10022	Non-CGI	FALSE	FALSE	TRUE
cg00152515	chr1	64239440	64239441	ROR1	4919	-248	CGI-N-Shore	TRUE	FALSE	FALSE
cg00154064	chr1	249153132	249153133	ZNF692	55657	181	CGI	TRUE	TRUE	FALSE
cg00161970	chr1	167684333	167684334	MPZL1	9019	-6852	CGI	FALSE	FALSE	TRUE
cg00165011	chr1	202927535	202927536	ADIPOR1	51094	163	CGI	TRUE	TRUE	FALSE
cg00172330	chr1	28052294	28052295	FAM76A	199870	-194	CGI	TRUE	FALSE	FALSE
cg00172408	chr1	111991531	111991532	ATP5F1	515	68	CGI	TRUE	TRUE	FALSE
cg00173141	chr1	210466172	210466173	HHAT	55733	-35422	CGI	FALSE	FALSE	TRUE
cg00177390	chr1	185126125	185126126	SWT1	54823	-65	CGI	TRUE	FALSE	FALSE
cg00251536	chr1	45205438	45205439	KIF2C	11004	-50	CGI	TRUE	FALSE	FALSE
cg00254532	chr1	155243310	155243311	HCN3	57657	-4062	CGI	TRUE	TRUE	FALSE
cg00255821	chr1	47489413	47489414	CYP4Z1	199974	-43745	CGI	TRUE	TRUE	FALSE
cg00256767	chr1	203096899	203096900	ADORA1	134	62	CGI	TRUE	FALSE	FALSE
cg00290506	chr1	224804226	224804227	CNIH3	149111	46	CGI	TRUE	FALSE	FALSE
cg00290994	chr1	41848739	41848740	EDN2	1907	101603	CGI	FALSE	FALSE	TRUE
cg00297432	chr1	6484784	6484785	HES2	54626	-53	CGI	TRUE	FALSE	FALSE
cg00300039	chr1	38397432	38397433	INPP5B	3633	15295	CGI	TRUE	TRUE	FALSE
cg00306607	chr1	246729875	246729876	CNST	163882	235	CGI	TRUE	FALSE	FALSE
cg00309178	chr1	242011396	242011397	EXO1	9156	-95	CGI	TRUE	FALSE	FALSE
cg00309462	chr1	1840482	1840483	CALML6	163688	-5782	CGI	FALSE	FALSE	TRUE
cg00350652	chr1	109584526	109584527	WDR47	22911	322	CGI	TRUE	FALSE	FALSE
cg00354179	chr1	180881480	180881481	KIAA1614	57710	-831	CGI	TRUE	FALSE	FALSE
cg00357368	chr1	84972303	84972304	GNG5	2787	-40	CGI	TRUE	TRUE	FALSE
cg00371107	chr1	27023736	27023737	ARID1A	8289	1213	CGI	TRUE	FALSE	FALSE
cg00385863	chr1	41847974	41847975	EDN2	1907	102368	CGI	FALSE	FALSE	TRUE
cg00385906	chr1	117910225	117910226	MAN1A2	10905	139	CGI	TRUE	FALSE	FALSE
cg00388605	chr1	89150448	89150449	PKN2	5586	525	CGI	FALSE	TRUE	FALSE
cg00396230	chr1	23037116	23037117	EPHB2	2048	-213	CGI	TRUE	FALSE	FALSE
cg00396407	chr1	226374726	226374727	ACBD3	64746	-302	CGI	TRUE	FALSE	FALSE
cg00396625	chr1	225997836	225997837	EPHX1	2052	38	CGI	TRUE	FALSE	FALSE
cg00397635	chr1	53309162	53309163	ZYG11A	440590	978	CGI	FALSE	TRUE	FALSE
cg00404177	chr1	51425685	51425686	FAF1	11124	249	CGI	TRUE	FALSE	FALSE
cg00416727	chr1	172541012	172541013	SUCO	51430	38751	CGI	FALSE	TRUE	FALSE
cg00418146	chr1	10003430	10003431	LZIC	84328	-2	CGI	TRUE	FALSE	FALSE
cg00419040	chr1	236445386	236445387	ERO1LB	56605	-46	CGI	TRUE	FALSE	FALSE
cg00426921	chr1	120254845	120254846	PHGDH	26227	425	CGI	FALSE	TRUE	FALSE
cg00427454	chr1	151119109	151119110	SEMA6C	10500	29	CGI	TRUE	FALSE	FALSE
cg00450060	chr1	25756870	25756871	RHCE	6006	-186	CGI	TRUE	FALSE	FALSE
cg00450304	chr1	167599527	167599528	RCSD1	92241	52	CGI	TRUE	FALSE	FALSE
cg00455333	chr1	45205373	45205374	KIF2C	11004	-115	CGI	TRUE	FALSE	FALSE
cg00455424	chr1	65468815	65468816	JAK1	3716	-36195	CGI	TRUE	FALSE	FALSE
cg00466488	chr1	118148927	118148928	FAM46C	54855	322	CGI	FALSE	TRUE	FALSE
cg00468144	chr1	113008976	113008977	WNT2B	7482	-1062	CGI	TRUE	FALSE	FALSE
cg00498603	chr1	178511772	178511773	C1orf220	400798	-157	CGI	TRUE	TRUE	FALSE
cg00498612	chr1	185126641	185126642	TRMT1L	81627	-410	CGI	TRUE	TRUE	FALSE
cg00502963	chr1	150488444	150488445	ECM1	1893	7956	CGI-S-Shore	FALSE	FALSE	TRUE
cg00541565	chr1	23346403	23346404	KDM1A	23028	461	CGI	TRUE	FALSE	FALSE
cg00543329	chr1	36235839	36235840	CLSPN	63967	-287	CGI-S-Shore	TRUE	FALSE	FALSE
cg00544955	chr1	27719331	27719332	GPR3	2827	178	CGI	TRUE	TRUE	FALSE
cg00545681	chr1	95007593	95007594	F3	2152	-179	CGI	TRUE	FALSE	FALSE
cg00564831	chr1	91966400	91966401	CDC7	8317	-2	CGI	TRUE	FALSE	FALSE
cg00569385	chr1	151032336	151032337	MLLT11	10962	184	CGI	TRUE	FALSE	FALSE
cg00570896	chr1	51443449	51443450	CDKN2C	1031	9840	CGI	FALSE	FALSE	TRUE
cg00576014	chr1	161284450	161284451	SDHC	6391	283	CGI	FALSE	TRUE	FALSE
cg00576639	chr1	25756900	25756901	RHCE	6006	-216	CGI	TRUE	FALSE	FALSE
cg00579409	chr1	52869541	52869542	ORC1	4998	600	CGI	TRUE	TRUE	FALSE
cg00581482	chr1	154298344	154298345	ATP8B2	57198	307	CGI	TRUE	TRUE	FALSE
cg00583332	chr1	21503461	21503462	EIF4G3	8672	-79	CGI	TRUE	FALSE	FALSE
cg00631482	chr1	21949221	21949222	RAP1GAP	5909	46633	CGI	TRUE	TRUE	FALSE
cg00649606	chr1	169455416	169455417	SLC19A2	10560	-207	CGI	TRUE	FALSE	FALSE
cg00654709	chr1	93646505	93646506	CCDC18	343099	223	CGI	TRUE	TRUE	FALSE
cg00660163	chr1	156052512	156052513	LMNA	4000	142	CGI	TRUE	TRUE	FALSE
cg00660251	chr1	89991016	89991017	LRRC8B	23507	618	CGI	FALSE	TRUE	FALSE
cg00662489	chr1	25942827	25942828	MAN1C1	57134	-1130	CGI	TRUE	FALSE	FALSE
cg00662684	chr1	92495818	92495819	EPHX4	253152	284	CGI	TRUE	FALSE	FALSE
cg00666978	chr1	150947442	150947443	CERS2	29956	35	CGI	TRUE	FALSE	FALSE
cg00668227	chr1	33336241	33336242	FNDC5	252995	1839	CGI-N-Shore	FALSE	TRUE	FALSE
cg00668525	chr1	91966377	91966378	CDC7	8317	-25	CGI	TRUE	FALSE	FALSE
cg00682386	chr1	41249583	41249584	KCNQ4	9132	-99	CGI	TRUE	FALSE	FALSE
cg00689868	chr1	54955366	54955367	ACOT11	26027	-52562	CGI-S-Shore	FALSE	FALSE	TRUE
cg00690431	chr1	186649354	186649355	PTGS2	5743	203	CGI	FALSE	TRUE	FALSE
cg00691125	chr1	169455409	169455410	SLC19A2	10560	-200	CGI	TRUE	FALSE	FALSE
cg00692559	chr1	156737950	156737951	PRCC	5546	675	CGI	TRUE	FALSE	FALSE
cg00695362	chr1	40506212	40506213	CAP1	10487	-41	CGI	TRUE	FALSE	FALSE
cg00697033	chr1	92950379	92950380	GFI1	2672	2052	CGI	TRUE	TRUE	FALSE
cg00702693	chr1	153939769	153939770	SLC39A1	27173	417	CGI	TRUE	TRUE	FALSE
cg00754584	chr1	155197279	155197280	GBAP1	2630	11160	CGI	TRUE	TRUE	FALSE
cg00756215	chr1	55230057	55230058	PARS2	25973	167	CGI	FALSE	TRUE	FALSE
cg00758584	chr1	40254741	40254742	BMP8B	656	-207	CGI	TRUE	FALSE	FALSE
cg00760200	chr1	115053833	115053834	TRIM33	51592	-51	CGI	TRUE	FALSE	FALSE
cg00767644	chr1	174968745	174968746	CACYBP	27101	173	CGI	TRUE	FALSE	FALSE
cg00773459	chr1	84464645	84464646	TTLL7	79739	186	CGI	TRUE	FALSE	FALSE
cg00773965	chr1	7831173	7831174	VAMP3	9341	-154	CGI	TRUE	FALSE	FALSE
cg00776782	chr1	12677088	12677089	DHRS3	9249	730	CGI	TRUE	TRUE	FALSE
cg00777895	chr1	225965676	225965677	SRP9	6726	160	CGI	TRUE	FALSE	FALSE
cg00778544	chr1	151584659	151584660	SNX27	81609	-1	CGI	TRUE	FALSE	FALSE
cg00780805	chr1	3566701	3566702	WRAP73	49856	-29	CGI	TRUE	FALSE	FALSE
cg00781186	chr1	182809277	182809278	DHX9	1660	837	CGI	FALSE	TRUE	FALSE
cg00781875	chr1	156252398	156252399	SMG5	23381	220	CGI	TRUE	FALSE	FALSE
cg00783553	chr1	7023495	7023496	CAMTA1	23261	178110	CGI-S-Shore	FALSE	TRUE	FALSE
cg00783945	chr1	205538293	205538294	MFSD4	148808	180	CGI	TRUE	FALSE	FALSE
cg00785522	chr1	150521766	150521767	ADAMTSL4	54507	-130	CGI	TRUE	FALSE	FALSE
cg00787537	chr1	211307839	211307840	KCNH1	3756	-381	CGI-S-Shore	TRUE	FALSE	FALSE
cg00788461	chr1	48937753	48937754	SPATA6	54558	121	CGI	TRUE	FALSE	FALSE
cg00794227	chr1	28696966	28696967	PHACTR4	65979	872	CGI	FALSE	TRUE	FALSE
cg00794722	chr1	194087394	194087395	B3GALT2	8707	-931650	Non-CGI	FALSE	FALSE	TRUE
cg00817100	chr1	229543254	229543255	ACTA1	58	26587	CGI	FALSE	FALSE	TRUE
cg00832850	chr1	25943841	25943842	MAN1C1	57134	-116	CGI	TRUE	FALSE	FALSE
cg00851154	chr1	26690578	26690579	ZNF683	257101	8686	CGI-S-Shelf	FALSE	TRUE	FALSE
cg00855021	chr1	236767903	236767904	HEATR1	55127	-61	CGI	TRUE	FALSE	FALSE
cg00866484	chr1	52082670	52082671	OSBPL9	114883	39818	CGI	TRUE	TRUE	FALSE
cg00894481	chr1	15912201	15912202	AGMAT	79814	-595	CGI-S-Shore	TRUE	TRUE	FALSE
cg00906976	chr1	231664136	231664137	TSNAX-DISC1	100303453	-261	CGI	TRUE	FALSE	FALSE
cg00909514	chr1	200860534	200860535	C1orf106	55765	-91	CGI	TRUE	FALSE	FALSE
cg00912467	chr1	161369970	161369971	C1orf192	257177	-32305	CGI	TRUE	FALSE	FALSE
cg00924484	chr1	110753232	110753233	KCNC4	3749	-102	CGI	TRUE	FALSE	FALSE
cg00926874	chr1	226309722	226309723	H3F3AP4	440926	58043	CGI	FALSE	FALSE	TRUE
cg00929392	chr1	19283191	19283192	IFFO2	126917	-364	CGI	TRUE	FALSE	FALSE
cg00930078	chr1	224301953	224301954	FBXO28	23219	161	CGI	TRUE	FALSE	FALSE
cg00937518	chr1	23036868	23036869	EPHB2	2048	-461	CGI	TRUE	FALSE	FALSE
cg00939558	chr1	154301037	154301038	ATP8B2	57198	3000	CGI-N-Shore	TRUE	TRUE	FALSE
cg00953777	chr1	11714506	11714507	FBXO44	93611	73	CGI	TRUE	FALSE	FALSE
cg00956639	chr1	35659678	35659679	SFPQ	6421	-934	CGI-S-Shore	TRUE	FALSE	FALSE
cg00958381	chr1	3408036	3408037	ARHGEF16	27237	36888	Non-CGI	FALSE	TRUE	FALSE
cg00959725	chr1	33282965	33282966	S100PBP	64766	-76	CGI	TRUE	FALSE	FALSE
cg00960509	chr1	21671908	21671909	ECE1	1889	124	CGI	TRUE	FALSE	FALSE
cg00978910	chr1	172502140	172502141	SUCO	51430	-118	CGI	TRUE	FALSE	FALSE
cg00993191	chr1	10093703	10093704	UBE4B	10277	661	CGI	TRUE	FALSE	FALSE
cg00997411	chr1	205290916	205290917	NUAK2	81788	-32	CGI	TRUE	FALSE	FALSE
cg01000656	chr1	84971486	84971487	GNG5	2787	774	CGI	TRUE	TRUE	FALSE
cg01006648	chr1	212525522	212525523	SNORA16B	692157	-636	Non-CGI	TRUE	TRUE	FALSE
cg01016553	chr1	51810627	51810628	TTC39A	22996	156	CGI	FALSE	TRUE	FALSE
cg01020399	chr1	249153122	249153123	ZNF692	55657	191	CGI	TRUE	TRUE	FALSE
cg01047268	chr1	235257304	235257305	SNORA14B	677802	33946	CGI	FALSE	FALSE	TRUE
cg01051310	chr1	228194443	228194444	WNT3A	89780	-278	CGI	TRUE	FALSE	FALSE
cg01051642	chr1	2517410	2517411	FAM213B	127281	-487	CGI-N-Shore	TRUE	FALSE	FALSE
cg01053463	chr1	26186087	26186088	AUNIP	79000	-238	CGI	TRUE	FALSE	FALSE
cg01065413	chr1	222791514	222791515	MIA3	375056	69	CGI	TRUE	FALSE	FALSE
cg01074347	chr1	93427451	93427452	FAM69A	388650	-371	CGI	TRUE	FALSE	FALSE
cg01075305	chr1	1152914	1152915	TNFRSF4	7293	-3365	CGI	FALSE	TRUE	FALSE
cg01179140	chr1	234745907	234745908	IRF2BP2	359948	-635	CGI	TRUE	FALSE	FALSE
cg01188685	chr1	157963448	157963449	KIRREL	55243	384	CGI	TRUE	FALSE	FALSE
cg01364968	chr1	50834303	50834304	DMRTA2	63950	54814	CGI	FALSE	FALSE	TRUE
cg01394819	chr1	53527665	53527666	PODN	127435	-57	CGI	TRUE	FALSE	FALSE
cg01412524	chr1	46860243	46860244	FAAH	2166	303	CGI	FALSE	TRUE	FALSE
cg01412936	chr1	43637799	43637800	WDR65	149465	-200	CGI	TRUE	TRUE	FALSE
cg01414845	chr1	41157169	41157170	NFYC	4802	-71	CGI	TRUE	FALSE	FALSE
cg01416578	chr1	228297160	228297161	MRPL55	128308	-146	CGI	TRUE	FALSE	FALSE
cg01418261	chr1	47697663	47697664	TAL1	6886	227	CGI	TRUE	TRUE	FALSE
cg01419479	chr1	182360822	182360823	GLUL	2752	517	CGI	TRUE	FALSE	FALSE
cg01423147	chr1	89458345	89458346	RBMXL1	494115	296	CGI	TRUE	FALSE	FALSE
cg01423964	chr1	111217575	111217576	KCNA3	3738	78	CGI	TRUE	FALSE	FALSE
cg01425479	chr1	35658293	35658294	SFPQ	6421	448	CGI	TRUE	FALSE	FALSE
cg01446477	chr1	28696170	28696171	PHACTR4	65979	76	CGI	TRUE	FALSE	FALSE
cg01446576	chr1	160313037	160313038	NCSTN	23385	-24	CGI	TRUE	FALSE	FALSE
cg01511126	chr1	40506125	40506126	CAP1	10487	-128	CGI	TRUE	FALSE	FALSE
cg01513967	chr1	8484004	8484005	SLC45A1	50651	99613	CGI	TRUE	TRUE	FALSE
cg01514859	chr1	6557734	6557735	PLEKHG5	57449	22333	CGI	TRUE	TRUE	FALSE
cg01517656	chr1	6272055	6272056	RNF207	388591	5865	CGI-S-Shelf	FALSE	TRUE	FALSE
cg01522456	chr1	115632236	115632237	TSPAN2	10100	-114	CGI	TRUE	FALSE	FALSE
cg01523799	chr1	65613685	65613686	AK4	205	452	CGI	TRUE	TRUE	FALSE
cg01530317	chr1	3566579	3566580	WRAP73	49856	90	CGI	TRUE	FALSE	FALSE
cg01551350	chr1	160951675	160951676	ITLN2	142683	-27085	CGI-N-Shore	FALSE	FALSE	TRUE
cg01564068	chr1	110198568	110198569	GSTM2	2946	-128	CGI-N-Shore	TRUE	FALSE	FALSE
cg01566260	chr1	32180356	32180357	COL16A1	1307	-10587	CGI	FALSE	FALSE	TRUE
cg01603146	chr1	152009641	152009642	S100A11	6282	-129	CGI-S-Shore	TRUE	TRUE	FALSE
cg01624937	chr1	43997446	43997447	PTPRF	5792	898	CGI	FALSE	TRUE	FALSE
cg01711073	chr1	37980396	37980397	MEAF6	64769	-31	CGI	TRUE	FALSE	FALSE
cg01711146	chr1	70671364	70671365	SRSF11	9295	0	CGI	TRUE	FALSE	FALSE
cg01716667	chr1	44440209	44440210	ATP6V0B	533	-391	CGI	TRUE	FALSE	FALSE
cg01719793	chr1	16533434	16533435	ARHGEF19	128272	5668	CGI	FALSE	TRUE	FALSE
cg01719979	chr1	161015883	161015884	USF1	7391	-125	CGI	TRUE	FALSE	FALSE
cg01723710	chr1	202927445	202927446	ADIPOR1	51094	253	CGI	TRUE	TRUE	FALSE
cg01728493	chr1	17866589	17866590	ARHGEF10L	55160	258	CGI	FALSE	TRUE	FALSE
cg01730534	chr1	174968376	174968377	CACYBP	27101	-193	CGI	TRUE	FALSE	FALSE
cg01780466	chr1	145477253	145477254	LIX1L	128077	167	CGI	TRUE	FALSE	FALSE
cg01785417	chr1	11538721	11538722	PTCHD2	57540	-572	CGI-N-Shore	TRUE	FALSE	FALSE
cg01786075	chr1	165738056	165738057	UCK2	7371	-58674	CGI	TRUE	TRUE	FALSE
cg01796143	chr1	236687575	236687576	LGALS8-AS1	100287902	231	CGI	TRUE	TRUE	FALSE
cg01799338	chr1	36348937	36348938	2001-08-01	26523	13527	CGI	TRUE	TRUE	FALSE
cg01800926	chr1	9884565	9884566	CLSTN1	22883	-14	CGI	TRUE	FALSE	FALSE
cg01801182	chr1	46998715	46998716	MKNK1-AS1	100507423	-5651	CGI	FALSE	FALSE	TRUE
cg01802117	chr1	53393560	53393561	SCP2	6342	658	CGI	TRUE	TRUE	FALSE
cg01802344	chr1	155232042	155232043	SCAMP3	10067	132	CGI	TRUE	FALSE	FALSE
cg01802975	chr1	67519155	67519156	SLC35D1	23169	923	CGI	TRUE	TRUE	FALSE
cg01815035	chr1	180601046	180601047	XPR1	9213	-98	CGI-N-Shore	TRUE	FALSE	FALSE
cg01823416	chr1	47082372	47082373	MOB3C	148932	189	CGI	TRUE	TRUE	FALSE
cg01827717	chr1	90287312	90287313	LRRC8D	55144	738	CGI	TRUE	TRUE	FALSE
cg01832569	chr1	171711313	171711314	VAMP4	8674	64	CGI	TRUE	FALSE	FALSE
cg01860753	chr1	206730586	206730587	RASSF5	83593	49706	CGI	TRUE	TRUE	FALSE
cg01879507	chr1	61522716	61522717	NFIA	4774	-20228	CGI	FALSE	FALSE	TRUE
cg01902939	chr1	54304230	54304231	TMEM48	55706	-4	CGI	TRUE	FALSE	FALSE
cg01905420	chr1	247241693	247241694	ZNF670-ZNF695	100533111	420	CGI	FALSE	TRUE	FALSE
cg01905589	chr1	26856408	26856409	RPS6KA1	6195	158	CGI	TRUE	FALSE	FALSE
cg01907584	chr1	228604413	228604414	TRIM17	51127	168	CGI	TRUE	FALSE	FALSE
cg01910231	chr1	156721823	156721824	MRPL24	79590	-10899	CGI	TRUE	TRUE	FALSE
cg01911468	chr1	236768193	236768194	HEATR1	55127	-351	CGI	TRUE	FALSE	FALSE
cg01920657	chr1	65775145	65775146	DNAJC6	9829	54996	CGI	TRUE	TRUE	FALSE
cg01923523	chr1	3712654	3712655	LRRC47	57470	412	CGI	TRUE	FALSE	FALSE
cg01925393	chr1	24194307	24194308	FUCA1	2517	550	CGI-N-Shore	TRUE	TRUE	FALSE
cg01931502	chr1	161284176	161284177	SDHC	6391	9	CGI	TRUE	FALSE	FALSE
cg01932843	chr1	117113824	117113825	CD58	965	-108	CGI	TRUE	FALSE	FALSE
cg01936090	chr1	179923733	179923734	CEP350	9857	-173	CGI	TRUE	FALSE	FALSE
cg01936430	chr1	204380496	204380497	PPP1R15B	84919	446	CGI	TRUE	FALSE	FALSE
cg01939664	chr1	33722135	33722136	ZNF362	149076	-37	CGI	TRUE	FALSE	FALSE
cg01972394	chr1	19229528	19229529	ALDH4A1	8659	-234	CGI	TRUE	FALSE	FALSE
cg01979157	chr1	2161013	2161014	SKI	6497	878	CGI	TRUE	FALSE	FALSE
cg01990334	chr1	42801334	42801335	FOXJ3	22887	212	CGI	TRUE	FALSE	FALSE
cg02031397	chr1	42383598	42383599	HIVEP3	59269	117996	CGI-N-Shore	FALSE	TRUE	FALSE
cg02054059	chr1	245318817	245318818	KIF26B	55083	529	CGI	FALSE	TRUE	FALSE
cg02060408	chr1	150898663	150898664	SETDB1	9869	-150	CGI	TRUE	FALSE	FALSE
cg02066222	chr1	114354688	114354689	RSBN1	54665	380	CGI	TRUE	FALSE	FALSE
cg02069519	chr1	51985103	51985104	EPS15	2060	-107	CGI	TRUE	FALSE	FALSE
cg02079933	chr1	167599631	167599632	RCSD1	92241	156	CGI	TRUE	FALSE	FALSE
cg02084808	chr1	172413246	172413247	PIGC	5279	-15	CGI	TRUE	TRUE	FALSE
cg02100343	chr1	31538517	31538518	PUM1	9698	244	CGI	TRUE	TRUE	FALSE
cg02106828	chr1	236959224	236959225	MTR	4548	642	CGI	FALSE	TRUE	FALSE
cg02151754	chr1	202679191	202679192	SYT2	127833	358	CGI	FALSE	TRUE	FALSE
cg02157078	chr1	114888769	114888770	TRIM33	51592	165010	CGI	FALSE	FALSE	TRUE
cg02273146	chr1	24969618	24969619	SRRM1	10250	23	CGI	TRUE	FALSE	FALSE
cg02280855	chr1	229693798	229693799	ABCB10	23456	642	CGI	FALSE	TRUE	FALSE
cg02287630	chr1	101361426	101361427	SLC30A7	148867	-204	CGI	TRUE	FALSE	FALSE
cg02290803	chr1	40997356	40997357	ZNF684	127396	122	CGI	TRUE	FALSE	FALSE
cg02291204	chr1	227506526	227506527	CDC42BPA	8476	-699	CGI	TRUE	FALSE	FALSE
cg02303538	chr1	179199092	179199093	ABL2	27	-272	CGI	TRUE	FALSE	FALSE
cg02328440	chr1	235813839	235813840	GNG4	2786	213	CGI	TRUE	TRUE	FALSE
cg02337836	chr1	110210641	110210642	GSTM2	2946	11942	CGI	TRUE	TRUE	FALSE
cg02340083	chr1	50882006	50882007	DMRTA2	63950	7111	CGI	FALSE	FALSE	TRUE
cg02342257	chr1	3535872	3535873	TPRG1L	127262	-5682	Non-CGI	FALSE	FALSE	TRUE
cg02362686	chr1	150521404	150521405	ADAMTSL4	54507	-492	CGI	TRUE	FALSE	FALSE
cg02365918	chr1	231473713	231473714	SPRTN	83932	30	CGI	TRUE	FALSE	FALSE
cg02366575	chr1	91966307	91966308	CDC7	8317	-95	CGI	TRUE	FALSE	FALSE
cg02386725	chr1	162467755	162467756	UHMK1	127933	790	CGI	TRUE	TRUE	FALSE
cg02386921	chr1	26233035	26233036	MIR3917	100500808	-89	CGI	TRUE	TRUE	FALSE
cg02388783	chr1	151254619	151254620	ZNF687	57592	524	CGI	TRUE	TRUE	FALSE
cg02392774	chr1	53164140	53164141	SELRC1	65260	-101	CGI	TRUE	FALSE	FALSE
cg02395396	chr1	52435307	52435308	RAB3B	5865	21127	Non-CGI	FALSE	TRUE	FALSE
cg02396143	chr1	29063512	29063513	YTHDF2	51441	378	CGI	TRUE	TRUE	FALSE
cg02452585	chr1	43424823	43424824	SLC2A1	6513	22	CGI	TRUE	FALSE	FALSE
cg02454364	chr1	236156917	236156918	NID1	4811	71562	CGI-N-Shore	FALSE	TRUE	FALSE
cg02454885	chr1	193032741	193032742	UCHL5	51377	-3503	CGI-S-Shelf	FALSE	TRUE	FALSE
cg02458039	chr1	226111372	226111373	LEFTY1	10637	591	CGI-N-Shore	TRUE	TRUE	FALSE
cg02480412	chr1	227128060	227128061	ADCK3	56997	43470	CGI	TRUE	TRUE	FALSE
cg02482614	chr1	995013	995014	RNF223	401934	14672	CGI	TRUE	FALSE	FALSE
cg02483484	chr1	4716537	4716538	AJAP1	55966	1431	CGI	FALSE	TRUE	FALSE
cg02487499	chr1	33937968	33937969	ZSCAN20	7579	-262	CGI-N-Shore	TRUE	FALSE	FALSE
cg02490994	chr1	78148370	78148371	ZZZ3	26009	732	CGI	TRUE	TRUE	FALSE
cg02565672	chr1	161123809	161123810	UFC1	51506	274	CGI	TRUE	FALSE	FALSE
cg02567839	chr1	242612787	242612788	PLD5	200150	75209	Non-CGI	TRUE	TRUE	FALSE
cg02570527	chr1	10970165	10970166	C1orf127	148345	71927	Non-CGI	FALSE	FALSE	TRUE
cg02572448	chr1	8763403	8763404	RERE	473	114294	CGI	FALSE	TRUE	FALSE
cg02573276	chr1	2344586	2344587	PEX10	5192	-575	CGI	TRUE	FALSE	FALSE
cg02574509	chr1	240255377	240255378	FMN2	56776	191	CGI	TRUE	FALSE	FALSE
cg02581421	chr1	1209196	1209197	UBE2J2	118424	36	CGI	TRUE	FALSE	FALSE
cg02583234	chr1	22157799	22157800	LDLRAD2	401944	19040	Non-CGI	TRUE	TRUE	FALSE
cg02583576	chr1	154244824	154244825	HAX1	10456	-213	CGI	TRUE	FALSE	FALSE
cg02586249	chr1	45452521	45452522	EIF2B3	8891	-159	CGI-S-Shore	TRUE	FALSE	FALSE
cg02618553	chr1	27321145	27321146	TRNP1	388610	949	CGI	FALSE	TRUE	FALSE
cg02619167	chr1	65613297	65613298	AK4	205	64	CGI	TRUE	FALSE	FALSE
cg02620307	chr1	161283965	161283966	SDHC	6391	-199	CGI	TRUE	FALSE	FALSE
cg02624704	chr1	173446429	173446430	PRDX6	9588	-55	CGI	TRUE	FALSE	FALSE
cg02625929	chr1	221052350	221052351	HLX	3142	-391	CGI	TRUE	FALSE	FALSE
cg02628801	chr1	101701963	101701964	S1PR1	1901	-340	CGI	TRUE	FALSE	FALSE
cg02631286	chr1	32281722	32281723	SPOCD1	90853	-141	Non-CGI	TRUE	FALSE	FALSE
cg02642404	chr1	244998532	244998533	COX20	116228	-105	CGI	TRUE	FALSE	FALSE
cg02671019	chr1	24829462	24829463	RCAN3AS	100750325	-611	CGI	TRUE	TRUE	FALSE
cg02673436	chr1	193074497	193074498	GLRX2	51022	745	CGI	TRUE	TRUE	FALSE
cg02693249	chr1	205600567	205600568	ELK4	2005	49061	CGI	FALSE	TRUE	FALSE
cg02697423	chr1	168105857	168105858	GPR161	23432	962	CGI	TRUE	TRUE	FALSE
cg02698600	chr1	201450009	201450010	PHLDA3	23612	-11709	CGI	FALSE	FALSE	TRUE
cg02700833	chr1	6321181	6321182	GPR153	387509	-145	CGI	TRUE	FALSE	FALSE
cg02711976	chr1	36023590	36023591	KIAA0319L	79932	-38	CGI	TRUE	TRUE	FALSE
cg02737801	chr1	43638006	43638007	WDR65	149465	4	CGI	TRUE	TRUE	FALSE
cg02748427	chr1	92764574	92764575	GLMN	11146	-7	CGI	TRUE	FALSE	FALSE
cg02769781	chr1	1713676	1713677	NADK	65220	-2167	CGI	FALSE	FALSE	TRUE
cg02838178	chr1	201368613	201368614	LAD1	3898	54	CGI	TRUE	FALSE	FALSE
cg02847098	chr1	111991921	111991922	WDR77	79084	-90	CGI	TRUE	TRUE	FALSE
cg02850329	chr1	24829455	24829456	RCAN3AS	100750325	-604	CGI	TRUE	TRUE	FALSE
cg02850933	chr1	249167489	249167490	ZNF692	55657	-14173	CGI	TRUE	FALSE	FALSE
cg02853781	chr1	19229053	19229054	ALDH4A1	8659	238	CGI	TRUE	FALSE	FALSE
cg02858053	chr1	84971927	84971928	GNG5	2787	333	CGI	TRUE	TRUE	FALSE
cg02858985	chr1	115322961	115322962	SIKE1	80143	345	CGI-N-Shore	FALSE	TRUE	FALSE
cg02861733	chr1	153930593	153930594	CRTC2	200186	537	CGI	FALSE	TRUE	FALSE
cg02863087	chr1	180911577	180911578	KIAA1614	57710	29263	CGI	FALSE	TRUE	FALSE
cg02892595	chr1	40974440	40974441	EXO5	64789	6	CGI	TRUE	FALSE	FALSE
cg02892898	chr1	53169070	53169071	SELRC1	65260	-5031	CGI	FALSE	FALSE	TRUE
cg02895381	chr1	32666481	32666482	CCDC28B	79140	278	CGI	FALSE	TRUE	FALSE
cg02899039	chr1	249152378	249152379	ZNF692	55657	935	CGI-N-Shore	TRUE	TRUE	FALSE
cg02899939	chr1	46016331	46016332	AKR1A1	10327	-122	CGI-N-Shore	TRUE	FALSE	FALSE
cg02900441	chr1	15911134	15911135	AGMAT	79814	469	CGI-N-Shore	FALSE	TRUE	FALSE
cg02901985	chr1	236958430	236958431	MTR	4548	-149	CGI	TRUE	FALSE	FALSE
cg02924110	chr1	9243242	9243243	MIR34A	407040	-31405	CGI	TRUE	FALSE	FALSE
cg02926005	chr1	26496421	26496422	ZNF593	51042	32	CGI	TRUE	FALSE	FALSE
cg02931001	chr1	228604037	228604038	TRIM17	51127	544	CGI	FALSE	TRUE	FALSE
cg02933679	chr1	13910224	13910225	PDPN	10630	-26	CGI	TRUE	FALSE	FALSE
cg02953624	chr1	21503600	21503601	EIF4G3	8672	-218	CGI	TRUE	FALSE	FALSE
cg02956660	chr1	22207011	22207012	HSPG2	3339	56737	CGI-N-Shelf	FALSE	TRUE	FALSE
cg02957057	chr1	236228598	236228599	NID1	4811	-116	CGI	TRUE	FALSE	FALSE
cg02970394	chr1	167906350	167906351	MPC2	25874	-42	CGI	TRUE	TRUE	FALSE
cg02974928	chr1	181452044	181452045	CACNA1E	777	-640	CGI	TRUE	FALSE	FALSE
cg02986938	chr1	174968958	174968959	CACYBP	27101	386	CGI-S-Shore	TRUE	TRUE	FALSE
cg02988267	chr1	78149396	78149397	ZZZ3	26009	-291	CGI	TRUE	FALSE	FALSE
cg02990361	chr1	107599529	107599530	PRMT6	55170	261	CGI	TRUE	FALSE	FALSE
cg02994162	chr1	159915569	159915570	IGSF9	57549	-182	CGI	TRUE	FALSE	FALSE
cg02996314	chr1	32479425	32479426	KHDRBS1	10657	-64	CGI	TRUE	FALSE	FALSE
cg03001415	chr1	8877741	8877742	RERE	473	-41	CGI	TRUE	FALSE	FALSE
cg03003689	chr1	156674970	156674971	CRABP2	1382	636	CGI	FALSE	TRUE	FALSE
cg03041742	chr1	43147857	43147858	YBX1	4904	-207	CGI	TRUE	FALSE	FALSE
cg03043663	chr1	2344561	2344562	PEX10	5192	-550	CGI	TRUE	FALSE	FALSE
cg03046264	chr1	6614344	6614345	NOL9	79707	312	CGI	TRUE	FALSE	FALSE
cg03080561	chr1	97187140	97187141	PTBP2	58155	-33	CGI-N-Shore	TRUE	FALSE	FALSE
cg03104869	chr1	54665948	54665949	MRPL37	51253	107	CGI	TRUE	FALSE	FALSE
cg03106313	chr1	152009084	152009085	S100A11	6282	425	CGI	FALSE	TRUE	FALSE
cg03108114	chr1	45966048	45966049	MMACHC	25974	191	CGI	TRUE	FALSE	FALSE
cg03111285	chr1	230561693	230561694	PGBD5	79605	-48301	CGI	FALSE	FALSE	TRUE
cg03112680	chr1	178063192	178063193	RASAL2-AS1	100302401	-63	CGI	TRUE	FALSE	FALSE
cg03115649	chr1	179851535	179851536	TOR1AIP1	26092	114	CGI	TRUE	FALSE	FALSE
cg03115835	chr1	26758846	26758847	DHDDS	79947	72	CGI	TRUE	FALSE	FALSE
cg03119126	chr1	155532420	155532421	ASH1L	55870	163	CGI	TRUE	TRUE	FALSE
cg03120289	chr1	99470550	99470551	LPPR5	163404	-100	CGI	TRUE	TRUE	FALSE
cg03126043	chr1	205601084	205601085	ELK4	2005	48544	CGI	TRUE	TRUE	FALSE
cg03128469	chr1	228674880	228674881	RNF187	149603	-186	CGI	TRUE	FALSE	FALSE
cg03128534	chr1	43423976	43423977	SLC2A1-AS1	440584	-742	CGI	TRUE	TRUE	FALSE
cg03130910	chr1	234908226	234908227	LOC100506810	100506810	48436	CGI-N-Shore	FALSE	FALSE	TRUE
cg03132197	chr1	28696105	28696106	PHACTR4	65979	11	CGI-N-Shore	TRUE	FALSE	FALSE
cg03133876	chr1	16532990	16532991	ARHGEF19	128272	6112	CGI	FALSE	TRUE	FALSE
cg03140827	chr1	117909199	117909200	MAN1A2	10905	-884	CGI	TRUE	FALSE	FALSE
cg03147210	chr1	151882284	151882285	THEM4	117145	75	CGI	TRUE	FALSE	FALSE
cg03150322	chr1	212965260	212965261	TATDN3	128387	89	CGI	TRUE	FALSE	FALSE
cg03152577	chr1	54411898	54411899	LRRC42	115353	-137	CGI	TRUE	FALSE	FALSE
cg03152785	chr1	110753723	110753724	KCNC4	3749	386	CGI	TRUE	FALSE	FALSE
cg03189756	chr1	241803820	241803821	OPN3	23596	-118	CGI	TRUE	FALSE	FALSE
cg03202416	chr1	64936247	64936248	CACHD1	57685	-227	CGI	TRUE	FALSE	FALSE
cg03208016	chr1	180124071	180124072	QSOX1	5768	102	CGI	TRUE	FALSE	FALSE
cg03220161	chr1	70671186	70671187	LRRC40	55631	173	CGI	TRUE	FALSE	FALSE
cg03226554	chr1	28573817	28573818	ATPIF1	93974	11214	CGI	FALSE	FALSE	TRUE
cg03227570	chr1	17766306	17766307	RCC2	55920	-55	CGI	TRUE	FALSE	FALSE
cg03228824	chr1	160313057	160313058	NCSTN	23385	-4	CGI	TRUE	FALSE	FALSE
cg03256465	chr1	59249883	59249884	JUN	3725	-97	CGI	TRUE	FALSE	FALSE
cg03258346	chr1	67896128	67896129	SERBP1	26135	-4	CGI	TRUE	FALSE	FALSE
cg03262077	chr1	109505986	109505987	CLCC1	23155	123	CGI	TRUE	FALSE	FALSE
cg03316474	chr1	151138495	151138496	SCNM1	79005	-1	CGI	TRUE	TRUE	FALSE
cg03317280	chr1	228675123	228675124	RNF187	149603	54	CGI	TRUE	FALSE	FALSE
cg03324123	chr1	231004380	231004381	C1orf198	84886	953	CGI	TRUE	TRUE	FALSE
cg03332597	chr1	185125704	185125705	SWT1	54823	-486	CGI	TRUE	TRUE	FALSE
cg03339458	chr1	151300581	151300582	PI4KB	5298	-389	CGI	TRUE	FALSE	FALSE
cg03340119	chr1	246952508	246952509	LOC149134	149134	13192	CGI	TRUE	TRUE	FALSE
cg03341334	chr1	159750442	159750443	DUSP23	54935	-315	CGI	TRUE	FALSE	FALSE
cg03342366	chr1	47184735	47184736	EFCAB14	9813	0	CGI	TRUE	FALSE	FALSE
cg03347170	chr1	27648560	27648561	TMEM222	84065	-74	CGI	TRUE	FALSE	FALSE
cg03349767	chr1	205425790	205425791	MIR135B	442891	-8263	CGI	FALSE	TRUE	FALSE
cg03351412	chr1	154909251	154909252	PMVK	10654	231	CGI	TRUE	FALSE	FALSE
cg03388085	chr1	154245414	154245415	HAX1	10456	374	CGI-S-Shore	FALSE	TRUE	FALSE
cg03391055	chr1	34628843	34628844	CSMD2	114784	2598	CGI	FALSE	TRUE	FALSE
cg03393821	chr1	145610981	145610982	RNF115	27246	-53	CGI	TRUE	FALSE	FALSE
cg03397389	chr1	36397003	36397004	2003-08-01	192669	683	CGI	TRUE	TRUE	FALSE
cg03400317	chr1	24070409	24070410	TCEB3	6924	552	CGI	FALSE	TRUE	FALSE
cg03401357	chr1	46951477	46951478	DMBX1	127343	-21189	CGI	FALSE	FALSE	TRUE
cg03401580	chr1	147142653	147142654	ACP6	51205	-18	CGI	TRUE	FALSE	FALSE
cg03408556	chr1	247274709	247274710	C1orf229	388759	1008	CGI	TRUE	FALSE	FALSE
cg03421807	chr1	46712916	46712917	RAD54L	8438	-449	CGI	TRUE	FALSE	FALSE
cg03436453	chr1	27816827	27816828	WASF2	10163	-148	CGI	TRUE	FALSE	FALSE
cg03441257	chr1	150039089	150039090	VPS45	11311	-251	CGI	TRUE	FALSE	FALSE
cg03470088	chr1	24513939	24513940	IFNLR1	163702	-173	CGI	TRUE	FALSE	FALSE
cg03470396	chr1	40782458	40782459	COL9A2	1298	600	CGI	FALSE	TRUE	FALSE
cg03518179	chr1	156470915	156470916	MEF2D	4209	-385	CGI	TRUE	FALSE	FALSE
cg03519711	chr1	86046512	86046513	CYR61	3491	67	CGI	TRUE	FALSE	FALSE
cg03523193	chr1	113162646	113162647	ST7L	54879	-240	CGI	TRUE	TRUE	FALSE
cg03534305	chr1	26147165	26147166	MTFR1L	56181	767	CGI	TRUE	TRUE	FALSE
cg03535361	chr1	224544794	224544795	CNIH4	29097	198	CGI	FALSE	TRUE	FALSE
cg03538499	chr1	27941694	27941695	AHDC1	27245	-11332	CGI	FALSE	TRUE	FALSE
cg03546360	chr1	12675968	12675969	DHRS3	9249	1850	CGI-N-Shore	FALSE	TRUE	FALSE
cg03548242	chr1	109235690	109235691	PRPF38B	55119	757	CGI	FALSE	TRUE	FALSE
cg03580297	chr1	99729804	99729805	LPPR4	9890	-42	CGI-N-Shore	TRUE	FALSE	FALSE
cg03586437	chr1	226070052	226070053	TMEM63A	9725	366	CGI	TRUE	FALSE	FALSE
cg03587150	chr1	154193741	154193742	C1orf43	25912	-467	CGI	TRUE	TRUE	FALSE
cg03597143	chr1	46767790	46767791	LRRC41	10489	1246	CGI	TRUE	TRUE	FALSE
cg03601828	chr1	120174361	120174362	ZNF697	90874	16027	CGI	FALSE	TRUE	FALSE
cg03602124	chr1	113258101	113258102	PPM1J	333926	-150	CGI	TRUE	FALSE	FALSE
cg03603214	chr1	49242757	49242758	BEND5	79656	-209	CGI	TRUE	TRUE	FALSE
cg03605784	chr1	31769832	31769833	ZCCHC17	51538	-8	CGI	TRUE	FALSE	FALSE
cg03611151	chr1	24229581	24229582	CNR2	1269	10234	CGI	FALSE	TRUE	FALSE
cg03651583	chr1	33815695	33815696	MIR3605	100500853	-17601	CGI	TRUE	TRUE	FALSE
cg03653801	chr1	9747772	9747773	C1orf200	644997	-33127	CGI	TRUE	TRUE	FALSE
cg03655395	chr1	56943111	56943112	PPAP2B	8613	102144	CGI-N-Shore	FALSE	FALSE	TRUE
cg03705284	chr1	1051907	1051908	C1orf159	54991	-170	CGI	TRUE	FALSE	FALSE
cg03716942	chr1	1821981	1821982	GNB1	2782	543	CGI	FALSE	TRUE	FALSE
cg03732087	chr1	50489654	50489655	AGBL4	84871	-27	CGI	TRUE	FALSE	FALSE
cg03735492	chr1	16543759	16543760	ARHGEF19	128272	-4654	CGI	FALSE	FALSE	TRUE
cg03735847	chr1	860925	860926	SAMD11	148398	394	CGI	TRUE	TRUE	FALSE
cg03741406	chr1	40255103	40255104	BMP8B	656	-569	CGI	TRUE	FALSE	FALSE
cg03745431	chr1	226736713	226736714	C1orf95	375057	211	CGI	TRUE	FALSE	FALSE
cg03750567	chr1	27676637	27676638	SYTL1	84958	8153	CGI	FALSE	TRUE	FALSE
cg03754143	chr1	1981548	1981549	PRKCZ	5590	-359	CGI	TRUE	FALSE	FALSE
cg03754311	chr1	20879029	20879030	FAM43B	163933	96	CGI	TRUE	FALSE	FALSE
cg03755098	chr1	70876598	70876599	CTH	1491	-301	CGI	TRUE	FALSE	FALSE
cg03756514	chr1	150552138	150552139	MCL1	4170	74	CGI	TRUE	FALSE	FALSE
cg03758693	chr1	166944830	166944831	MAEL	84944	10	CGI	TRUE	FALSE	FALSE
cg03763387	chr1	182808220	182808221	DHX9	1660	-217	CGI	TRUE	FALSE	FALSE
cg03813443	chr1	232765924	232765925	SIPA1L2	57568	-114680	CGI	FALSE	FALSE	TRUE
cg03884414	chr1	38061497	38061498	GNL2	29889	87	CGI	TRUE	FALSE	FALSE
cg03894975	chr1	29586570	29586571	PTPRU	10076	23541	CGI	FALSE	TRUE	FALSE
cg03897866	chr1	181059633	181059634	IER5	51278	1994	CGI	TRUE	FALSE	FALSE
cg03902160	chr1	29586660	29586661	PTPRU	10076	23631	CGI	FALSE	TRUE	FALSE
cg03902951	chr1	22263856	22263857	HSPG2	3339	-105	CGI	TRUE	FALSE	FALSE
cg03909781	chr1	3664064	3664065	TP73-AS1	57212	-126	CGI	TRUE	FALSE	FALSE
cg03915268	chr1	28969692	28969693	TAF12	6883	-87	CGI	TRUE	FALSE	FALSE
cg03939875	chr1	46016565	46016566	AKR1A1	10327	109	CGI	TRUE	TRUE	FALSE
cg03940137	chr1	200708937	200708938	CAMSAP2	23271	250	CGI	TRUE	FALSE	FALSE
cg03946269	chr1	38259490	38259491	MANEAL	149175	-282	CGI	TRUE	FALSE	FALSE
cg03970039	chr1	6550645	6550646	TNFRSF25	8718	-24389	CGI	TRUE	TRUE	FALSE
cg03982820	chr1	40723960	40723961	ZMPSTE24	10269	226	CGI	TRUE	FALSE	FALSE
cg03990984	chr1	44820872	44820873	ERI3	79033	65	CGI	TRUE	FALSE	FALSE
cg03992926	chr1	186344761	186344762	TPR	7175	101	CGI	TRUE	TRUE	FALSE
cg04013393	chr1	19578177	19578178	MRTO4	51154	101	CGI	TRUE	FALSE	FALSE
cg04015594	chr1	2458098	2458099	PANK4	55229	-62	CGI	TRUE	FALSE	FALSE
cg04018299	chr1	155023650	155023651	ADAM15	8751	227	CGI	TRUE	TRUE	FALSE
cg04080067	chr1	205601196	205601197	ELK4	2005	48432	CGI	TRUE	TRUE	FALSE
cg04084401	chr1	211432139	211432140	RCOR3	55758	-567	CGI	TRUE	FALSE	FALSE
cg04096723	chr1	8414772	8414773	SLC45A1	50651	30381	CGI-S-Shore	FALSE	TRUE	FALSE
cg04100463	chr1	3540901	3540902	TPRG1L	127262	-653	CGI	TRUE	FALSE	FALSE
cg04101267	chr1	95538294	95538295	ALG14	199857	211	CGI	FALSE	TRUE	FALSE
cg04108127	chr1	222885781	222885782	BROX	148362	-123	CGI	TRUE	TRUE	FALSE
cg04122068	chr1	160068504	160068505	IGSF8	93185	112	CGI	TRUE	TRUE	FALSE
cg04123845	chr1	21044321	21044322	KIF17	57576	-3	CGI	TRUE	FALSE	FALSE
cg04125625	chr1	29564120	29564121	PTPRU	10076	1091	CGI	FALSE	TRUE	FALSE
cg04138155	chr1	243419250	243419251	SDCCAG8	10806	-55	CGI	TRUE	FALSE	FALSE
cg04140924	chr1	149857337	149857338	HIST2H2BE	8349	893	CGI	TRUE	FALSE	FALSE
cg04143106	chr1	153963266	153963267	RPS27	6232	26	CGI	TRUE	FALSE	FALSE
cg04143346	chr1	100315927	100315928	AGL	178	286	CGI	TRUE	FALSE	FALSE
cg04143372	chr1	153700876	153700877	INTS3	65123	326	CGI-S-Shore	TRUE	TRUE	FALSE
cg04157804	chr1	21766405	21766406	NBPF3	84224	-224	CGI	TRUE	FALSE	FALSE
cg04158730	chr1	242011433	242011434	EXO1	9156	-58	CGI	TRUE	FALSE	FALSE
cg04167064	chr1	46932305	46932306	LOC729041	729041	32805	CGI	FALSE	FALSE	TRUE
cg04205193	chr1	12079676	12079677	MIIP	60672	376	CGI	FALSE	TRUE	FALSE
cg04208114	chr1	59012469	59012470	OMA1	115209	-22	CGI	TRUE	FALSE	FALSE
cg04209911	chr1	177140145	177140146	FAM5B	57795	-486	CGI-N-Shore	TRUE	FALSE	FALSE
cg04237804	chr1	16940110	16940111	NBPF1	55672	-127	CGI	TRUE	FALSE	FALSE
cg04238348	chr1	215257222	215257223	KCNK2	3776	78336	CGI-S-Shore	FALSE	TRUE	FALSE
cg04248396	chr1	85155724	85155725	SSX2IP	117178	714	CGI	FALSE	TRUE	FALSE
cg04261791	chr1	109289295	109289296	STXBP3	6814	9	CGI	TRUE	FALSE	FALSE
cg04272632	chr1	34629400	34629401	CSMD2	114784	2041	CGI	FALSE	TRUE	FALSE
cg04275664	chr1	89149955	89149956	PKN2	5586	32	CGI	TRUE	TRUE	FALSE
cg04282138	chr1	98511226	98511227	MIR2682	100616452	-318	CGI	TRUE	TRUE	FALSE
cg04290779	chr1	41962067	41962068	EDN2	1907	-11722	CGI	FALSE	FALSE	TRUE
cg04292718	chr1	208084456	208084457	CD34	947	225	CGI	TRUE	FALSE	FALSE
cg04295733	chr1	166845736	166845737	TADA1	117143	-81	CGI	TRUE	FALSE	FALSE
cg04296885	chr1	155100420	155100421	EFNA1	1942	70	CGI	TRUE	FALSE	FALSE
cg04297152	chr1	179262983	179262984	SOAT1	6646	133	CGI	TRUE	FALSE	FALSE
cg04299080	chr1	38274753	38274754	YRDC	79693	-887	CGI-S-Shore	TRUE	TRUE	FALSE
cg04312406	chr1	226497240	226497241	LIN9	286826	314	CGI	TRUE	TRUE	FALSE
cg04314218	chr1	43919181	43919182	HYI	81888	477	CGI-N-Shore	TRUE	TRUE	FALSE
cg04316593	chr1	165667584	165667585	ALDH9A1	223	314	CGI	TRUE	TRUE	FALSE
cg04317543	chr1	156084516	156084517	LMNA	4000	32146	CGI-N-Shore	TRUE	TRUE	FALSE
cg04342538	chr1	43232911	43232912	C1orf50	79078	-3	CGI	TRUE	FALSE	FALSE
cg04351049	chr1	165325673	165325674	LMX1A	4009	277	CGI	TRUE	FALSE	FALSE
cg04353385	chr1	115124207	115124208	BCAS2	10286	56	CGI	TRUE	TRUE	FALSE
cg04362907	chr1	211688645	211688646	RD3	343035	-22385	CGI	FALSE	FALSE	TRUE
cg04364463	chr1	37498270	37498271	GRIK3	2899	1572	CGI-N-Shore	FALSE	TRUE	FALSE
cg04365817	chr1	101491640	101491641	DPH5	51611	2	CGI	TRUE	TRUE	FALSE
cg04366039	chr1	40366684	40366685	MYCL1	4610	1001	CGI-N-Shore	TRUE	TRUE	FALSE
cg04392971	chr1	161369648	161369649	C1orf192	257177	-31983	CGI	TRUE	FALSE	FALSE
cg04395739	chr1	155247196	155247197	HCN3	57657	-176	CGI	TRUE	TRUE	FALSE
cg04402095	chr1	156721844	156721845	MRPL24	79590	-10920	CGI	TRUE	TRUE	FALSE
cg04405332	chr1	167789609	167789610	ADCY10	55811	93842	CGI	FALSE	TRUE	FALSE
cg04439128	chr1	226497537	226497538	LIN9	286826	17	CGI	TRUE	FALSE	FALSE
cg04453065	chr1	86046661	86046662	CYR61	3491	216	CGI	TRUE	FALSE	FALSE
cg04504182	chr1	202777459	202777460	KDM5B	10765	88	CGI	TRUE	FALSE	FALSE
cg04504933	chr1	77685251	77685252	PIGK	10026	-118	CGI	TRUE	FALSE	FALSE
cg04558166	chr1	210001279	210001280	DIEXF	27042	-31	CGI	TRUE	FALSE	FALSE
cg04559183	chr1	2323427	2323428	RER1	11079	212	CGI	TRUE	TRUE	FALSE
cg04559609	chr1	101361710	101361711	SLC30A7	148867	77	CGI	TRUE	FALSE	FALSE
cg04562522	chr1	22469714	22469715	WNT4	54361	669	CGI	TRUE	TRUE	FALSE
cg04566392	chr1	202927073	202927074	ADIPOR1	51094	625	CGI	FALSE	TRUE	FALSE
cg04567169	chr1	173793730	173793731	CENPL	91687	45	CGI	TRUE	FALSE	FALSE
cg04567466	chr1	23894902	23894903	ID3	3399	-8616	CGI	FALSE	FALSE	TRUE
cg04575263	chr1	110882079	110882080	RBM15	64783	133	CGI	TRUE	FALSE	FALSE
cg04576042	chr1	35545182	35545183	ZMYM1	79830	209	CGI	FALSE	TRUE	FALSE
cg04580334	chr1	45805972	45805973	MUTYH	4595	168	CGI	TRUE	FALSE	FALSE
cg04604276	chr1	23670779	23670780	HNRNPR	10236	72	CGI	TRUE	FALSE	FALSE
cg04605084	chr1	91487590	91487591	ZNF644	84146	220	CGI	TRUE	FALSE	FALSE
cg04607100	chr1	15850698	15850699	CASP9	842	585	CGI	TRUE	TRUE	FALSE
cg04623088	chr1	151584743	151584744	SNX27	81609	80	CGI	TRUE	FALSE	FALSE
cg04701420	chr1	101701527	101701528	S1PR1	1901	-776	CGI-N-Shore	TRUE	FALSE	FALSE
cg04701473	chr1	161359506	161359507	C1orf192	257177	-21841	CGI	FALSE	FALSE	TRUE
cg04703241	chr1	99127056	99127057	SNX7	51375	-178	CGI	TRUE	FALSE	FALSE
cg04704227	chr1	19923429	19923430	C1orf151-NBL1	100532736	-40	CGI	TRUE	FALSE	FALSE
cg04704947	chr1	28167586	28167587	SCARNA1	677774	6673	Non-CGI	TRUE	TRUE	FALSE
cg04705273	chr1	173837298	173837299	ZBTB37	84614	77	CGI	TRUE	FALSE	FALSE
cg04705659	chr1	204329107	204329108	PLEKHA6	22874	-62	CGI-N-Shelf	TRUE	FALSE	FALSE
cg04705907	chr1	169764193	169764194	METTL18	92342	-161	CGI	TRUE	TRUE	FALSE
cg04706183	chr1	155579900	155579901	MSTO1	55154	-105	CGI	TRUE	FALSE	FALSE
cg04720785	chr1	51434666	51434667	CDKN2C	1031	1057	CGI	TRUE	FALSE	FALSE
cg04724058	chr1	150208087	150208088	ANP32E	81611	415	CGI-S-Shore	TRUE	FALSE	FALSE
cg04725029	chr1	15850746	15850747	CASP9	842	537	CGI	TRUE	TRUE	FALSE
cg04786142	chr1	234908381	234908382	LOC100506810	100506810	48591	CGI	FALSE	FALSE	TRUE
cg04787602	chr1	112282986	112282987	LOC100506343	100506343	522	CGI	TRUE	TRUE	FALSE
cg04788931	chr1	28241327	28241328	RPA2	6118	-90	CGI	TRUE	FALSE	FALSE
cg04838747	chr1	92950450	92950451	GFI1	2672	1981	CGI	TRUE	TRUE	FALSE
cg04840417	chr1	1243573	1243574	PUSL1	126789	-419	CGI	TRUE	TRUE	FALSE
cg04841346	chr1	145096723	145096724	SEC22B	9554	315	CGI	FALSE	TRUE	FALSE
cg04841648	chr1	182808313	182808314	DHX9	1660	-124	CGI	TRUE	FALSE	FALSE
cg04844391	chr1	222885834	222885835	BROX	148362	-70	CGI	TRUE	TRUE	FALSE
cg04847795	chr1	70820736	70820737	HHLA3	11147	242	CGI	TRUE	FALSE	FALSE
cg04856841	chr1	156308275	156308276	CCT3	7203	-68	CGI	TRUE	TRUE	FALSE
cg04874113	chr1	226271304	226271305	H3F3AP4	440926	19625	CGI	TRUE	FALSE	FALSE
cg04875476	chr1	156720919	156720920	MRPL24	79590	-9995	CGI	FALSE	TRUE	FALSE
cg04890457	chr1	167683730	167683731	MPZL1	9019	-7455	CGI	TRUE	FALSE	FALSE
cg04892409	chr1	170501224	170501225	GORAB	92344	-37	CGI	TRUE	FALSE	FALSE
cg04897742	chr1	16085148	16085149	FBLIM1	54751	1993	CGI	TRUE	TRUE	FALSE
cg04900427	chr1	43613567	43613568	FAM183A	440585	-25	CGI	TRUE	FALSE	FALSE
cg04902671	chr1	21058625	21058626	SH2D5	400745	703	CGI	FALSE	TRUE	FALSE
cg04932544	chr1	210111403	210111404	SYT14	255928	-133	CGI	TRUE	FALSE	FALSE
cg04933208	chr1	29586414	29586415	PTPRU	10076	23385	CGI	FALSE	TRUE	FALSE
cg04936970	chr1	40974132	40974133	EXO5	64789	-299	CGI	TRUE	FALSE	FALSE
cg04937080	chr1	58715532	58715533	OMA1	115209	296912	CGI	FALSE	TRUE	FALSE
cg04972775	chr1	95007573	95007574	F3	2152	-159	CGI	TRUE	FALSE	FALSE
cg04998419	chr1	40626967	40626968	RLF	6018	-72	CGI	TRUE	FALSE	FALSE
cg05002512	chr1	51425990	51425991	FAF1	11124	-53	CGI	TRUE	FALSE	FALSE
cg05004431	chr1	38455961	38455962	SF3A3	10946	-199	CGI	TRUE	FALSE	FALSE
cg05037680	chr1	155579817	155579818	MSTO1	55154	-188	CGI	TRUE	FALSE	FALSE
cg05043032	chr1	95583073	95583074	TMEM56-RWDD3	100527978	-404	CGI	TRUE	TRUE	FALSE
cg05043048	chr1	45266447	45266448	PLK3	1263	410	CGI	FALSE	TRUE	FALSE
cg05046525	chr1	35395821	35395822	DLGAP3	58512	-24836	CGI	FALSE	FALSE	TRUE
cg05065507	chr1	59042931	59042932	TACSTD2	4070	233	CGI	TRUE	FALSE	FALSE
cg05119385	chr1	244998681	244998682	COX20	116228	41	CGI	TRUE	FALSE	FALSE
cg05121790	chr1	12123554	12123555	TNFRSF8	943	119	CGI	TRUE	FALSE	FALSE
cg05125578	chr1	43613565	43613566	FAM183A	440585	-27	CGI	TRUE	FALSE	FALSE
cg05127153	chr1	6452942	6452943	ACOT7	11332	882	CGI	FALSE	TRUE	FALSE
cg05127440	chr1	226737766	226737767	C1orf95	375057	1264	CGI-S-Shore	FALSE	TRUE	FALSE
cg05129412	chr1	165600470	165600471	MGST3	4259	359	CGI	TRUE	FALSE	FALSE
cg05134232	chr1	109968980	109968981	PSMA5	5686	126	CGI	TRUE	TRUE	FALSE
cg05135015	chr1	153963304	153963305	RPS27	6232	64	CGI	FALSE	TRUE	FALSE
cg05135541	chr1	150039387	150039388	VPS45	11311	44	CGI	TRUE	FALSE	FALSE
cg05136099	chr1	33282968	33282969	S100PBP	64766	-73	CGI	TRUE	FALSE	FALSE
cg05139434	chr1	41328180	41328181	CITED4	163732	-161	CGI	TRUE	FALSE	FALSE
cg05157318	chr1	29508594	29508595	SRSF4	6429	41	CGI	TRUE	FALSE	FALSE
cg05159043	chr1	43282594	43282595	ERMAP	114625	-180	CGI-N-Shore	TRUE	TRUE	FALSE
cg05262634	chr1	38157968	38157969	C1orf109	54955	-79	CGI	TRUE	FALSE	FALSE
cg05265975	chr1	11865858	11865859	MTHFR	4524	300	CGI	TRUE	TRUE	FALSE
cg05267876	chr1	229644265	229644266	NUP133	55746	-176	CGI	TRUE	FALSE	FALSE
cg05270381	chr1	202976926	202976927	TMEM183A	92703	391	CGI	TRUE	TRUE	FALSE
cg05306153	chr1	55416414	55416415	TMEM61	199964	-30049	CGI	FALSE	FALSE	TRUE
cg05309964	chr1	156182615	156182616	PMF1-BGLAP	100527963	-162	CGI	TRUE	FALSE	FALSE
cg05336094	chr1	38512238	38512239	POU3F1	5453	210	CGI	TRUE	FALSE	FALSE
cg05347845	chr1	229569892	229569893	ACTA1	58	-48	CGI	TRUE	FALSE	FALSE
cg05352161	chr1	72748139	72748140	NEGR1	257194	264	CGI	TRUE	FALSE	FALSE
cg05353710	chr1	28586936	28586937	SESN2	83667	972	CGI	FALSE	TRUE	FALSE
cg05364211	chr1	213188787	213188788	ANGEL2	90806	379	CGI	TRUE	TRUE	FALSE
cg05364767	chr1	54587375	54587376	CDCP2	200008	32066	CGI	FALSE	FALSE	TRUE
cg05372549	chr1	11119861	11119862	SRM	6723	228	CGI	TRUE	FALSE	FALSE
cg05375728	chr1	58715539	58715540	OMA1	115209	296905	CGI	FALSE	TRUE	FALSE
cg05376185	chr1	47082869	47082870	MOB3C	148932	-305	CGI-S-Shore	TRUE	FALSE	FALSE
cg05377226	chr1	171810910	171810911	DNM3	26052	288	CGI	TRUE	FALSE	FALSE
cg05377596	chr1	61547973	61547974	NFIA	4774	5026	CGI	TRUE	TRUE	FALSE
cg05383153	chr1	178995099	178995100	FAM20B	9917	24	CGI	TRUE	FALSE	FALSE
cg05385496	chr1	28099963	28099964	STX12	23673	268	CGI	FALSE	TRUE	FALSE
cg05386151	chr1	205719341	205719342	NUCKS1	64710	29	CGI	TRUE	FALSE	FALSE
cg05387519	chr1	50489730	50489731	AGBL4	84871	-103	CGI	TRUE	FALSE	FALSE
cg05388468	chr1	193074664	193074665	GLRX2	51022	578	CGI	TRUE	TRUE	FALSE
cg05388840	chr1	41981911	41981912	EDN2	1907	-31566	CGI-N-Shore	FALSE	TRUE	FALSE
cg05396182	chr1	93544739	93544740	MTF2	22823	-51	CGI	TRUE	FALSE	FALSE
cg05445839	chr1	27023088	27023089	ARID1A	8289	565	CGI	TRUE	FALSE	FALSE
cg05527091	chr1	1046324	1046325	C1orf159	54991	5410	CGI-S-Shore	FALSE	TRUE	FALSE
cg05590267	chr1	244615585	244615586	ADSS	159	-148	CGI	TRUE	FALSE	FALSE
cg05597180	chr1	1976394	1976395	PRKCZ	5590	-5513	CGI	FALSE	FALSE	TRUE
cg05598845	chr1	145477534	145477535	LIX1L	128077	448	CGI	FALSE	TRUE	FALSE
cg05639679	chr1	33219593	33219594	KIAA1522	57648	12080	CGI	TRUE	TRUE	FALSE
cg05640069	chr1	94312038	94312039	MIR760	100126348	-348	CGI	TRUE	TRUE	FALSE
cg05642873	chr1	202858370	202858371	RABIF	5877	13	CGI	TRUE	FALSE	FALSE
cg05650458	chr1	228270764	228270765	ARF1	375	402	CGI	TRUE	TRUE	FALSE
cg05651283	chr1	53098912	53098913	FAM159A	348378	-152	CGI	TRUE	FALSE	FALSE
cg05653691	chr1	16175060	16175061	FLJ37453	729614	-417	CGI	TRUE	TRUE	FALSE
cg05653859	chr1	197170372	197170373	CRB1	23418	-218	CGI	TRUE	FALSE	FALSE
cg05654404	chr1	45452166	45452167	EIF2B3	8891	193	CGI	TRUE	FALSE	FALSE
cg05655671	chr1	184943630	184943631	FAM129A	116496	50	CGI	TRUE	FALSE	FALSE
cg05657805	chr1	40942785	40942786	ZFP69	339559	-515	CGI-N-Shore	TRUE	FALSE	FALSE
cg05659773	chr1	9791208	9791209	C1orf200	644997	-76563	CGI	FALSE	TRUE	FALSE
cg05696109	chr1	223316668	223316669	TLR5	7100	-43	CGI	TRUE	FALSE	FALSE
cg05697849	chr1	50513766	50513767	ELAVL4	1996	79	CGI	TRUE	FALSE	FALSE
cg05704639	chr1	43855450	43855451	MED8	112950	31	CGI	TRUE	FALSE	FALSE
cg05712296	chr1	151445973	151445974	POGZ	23126	-14031	CGI	FALSE	FALSE	TRUE
cg05720261	chr1	40105304	40105305	HEYL	26508	42	CGI	TRUE	FALSE	FALSE
cg05752786	chr1	202679755	202679756	SYT2	127833	-203	CGI-S-Shore	TRUE	FALSE	FALSE
cg05753589	chr1	2064765	2064766	C1orf86	199990	74405	CGI	FALSE	TRUE	FALSE
cg05759718	chr1	50489596	50489597	AGBL4	84871	28	CGI	TRUE	FALSE	FALSE
cg05764240	chr1	205425468	205425469	MIR135B	442891	-7941	CGI	FALSE	TRUE	FALSE
cg05764766	chr1	19638718	19638719	PQLC2	54896	-20	CGI	TRUE	FALSE	FALSE
cg05775451	chr1	228353712	228353713	IBA57	200205	282	CGI	TRUE	FALSE	FALSE
cg05780577	chr1	21113751	21113752	HP1BP3	50809	46	CGI	TRUE	FALSE	FALSE
cg05784314	chr1	153747728	153747729	SLC27A3	11000	-38	CGI	TRUE	FALSE	FALSE
cg05785298	chr1	204654622	204654623	LRRN2	10446	-24	CGI	TRUE	TRUE	FALSE
cg05786840	chr1	228195377	228195378	WNT3A	89780	653	CGI-S-Shore	FALSE	TRUE	FALSE
cg05788332	chr1	23810871	23810872	ASAP3	55616	184	CGI	TRUE	TRUE	FALSE
cg05788417	chr1	155053491	155053492	LOC100505666	100505666	-17023	CGI	FALSE	TRUE	FALSE
cg05792124	chr1	115053491	115053492	TRIM33	51592	288	CGI	TRUE	FALSE	FALSE
cg05793340	chr1	116518770	116518771	SLC22A15	55356	-347	CGI	TRUE	FALSE	FALSE
cg05796321	chr1	92950348	92950349	GFI1	2672	2083	CGI	TRUE	TRUE	FALSE
cg05797363	chr1	68962972	68962973	DEPDC1	55635	-172	CGI	TRUE	TRUE	FALSE
cg05806577	chr1	150849160	150849161	ARNT	405	82	CGI	TRUE	FALSE	FALSE
cg05810096	chr1	35734604	35734605	ZMYM4	9202	35	CGI	TRUE	FALSE	FALSE
cg05816868	chr1	26686860	26686861	AIM1L	55057	-6238	CGI	FALSE	FALSE	TRUE
cg05819172	chr1	33815750	33815751	MIR3605	100500853	-17656	CGI	TRUE	TRUE	FALSE
cg05888917	chr1	156626749	156626750	BCAN	63827	15008	CGI-N-Shore	FALSE	TRUE	FALSE
cg05919561	chr1	84465150	84465151	TTLL7	79739	-316	CGI	TRUE	FALSE	FALSE
cg05930400	chr1	36273677	36273678	2004-08-01	192670	-149	CGI	TRUE	FALSE	FALSE
cg05947402	chr1	110052352	110052353	AMIGO1	57463	-15	CGI	TRUE	FALSE	FALSE
cg05952202	chr1	1136401	1136402	TNFRSF18	8784	5686	CGI	FALSE	FALSE	TRUE
cg05962139	chr1	228871311	228871312	DUSP5P1	574029	90916	CGI	TRUE	TRUE	FALSE
cg05966983	chr1	36772666	36772667	SH3D21	79729	671	CGI	TRUE	TRUE	FALSE
cg05969021	chr1	23886005	23886006	ID3	3399	278	CGI	TRUE	FALSE	FALSE
cg05969530	chr1	169455344	169455345	SLC19A2	10560	-135	CGI	TRUE	FALSE	FALSE
cg05985501	chr1	33516621	33516622	AK2	204	-14108	CGI-N-Shore	FALSE	FALSE	TRUE
cg06035839	chr1	151119150	151119151	SEMA6C	10500	-9	CGI	TRUE	FALSE	FALSE
cg06038049	chr1	1259909	1259910	CPSF3L	54973	135	CGI	TRUE	TRUE	FALSE
cg06057576	chr1	27719045	27719046	GPR3	2827	-105	CGI	TRUE	FALSE	FALSE
cg06058618	chr1	155057452	155057453	LOC100505666	100505666	-20984	CGI	FALSE	TRUE	FALSE
cg06058681	chr1	38757813	38757814	LOC339442	339442	-77373	CGI	FALSE	FALSE	TRUE
cg06060191	chr1	99729790	99729791	LPPR4	9890	-56	CGI-N-Shore	TRUE	FALSE	FALSE
cg06078874	chr1	231114777	231114778	ARV1	64801	-44	CGI	TRUE	FALSE	FALSE
cg06079481	chr1	112282263	112282264	LOC100506343	100506343	-198	CGI	TRUE	TRUE	FALSE
cg06082821	chr1	94313460	94313461	BCAR3	8412	-753	CGI	TRUE	FALSE	FALSE
cg06087298	chr1	118149316	118149317	FAM46C	54855	711	CGI	FALSE	TRUE	FALSE
cg06087962	chr1	32671135	32671136	IQCC	55721	-99	CGI	TRUE	FALSE	FALSE
cg06091566	chr1	860621	860622	SAMD11	148398	90	CGI	TRUE	TRUE	FALSE
cg06096824	chr1	51443952	51443953	CDKN2C	1031	10343	CGI	FALSE	FALSE	TRUE
cg06098761	chr1	210405808	210405809	SERTAD4	56256	-385	CGI	TRUE	TRUE	FALSE
cg06124224	chr1	99470709	99470710	LPPR5	163404	-259	CGI	TRUE	TRUE	FALSE
cg06128920	chr1	1447374	1447375	ATAD3A	55210	-147	CGI	TRUE	FALSE	FALSE
cg06160440	chr1	155243364	155243365	HCN3	57657	-4008	CGI	TRUE	TRUE	FALSE
cg06161752	chr1	100715424	100715425	DBT	1629	-14	CGI	TRUE	FALSE	FALSE
cg06175825	chr1	55007736	55007737	ACOT11	26027	-192	CGI	TRUE	FALSE	FALSE
cg06177627	chr1	23751208	23751209	TCEA3	6920	51	CGI	TRUE	FALSE	FALSE
cg06187843	chr1	47973794	47973795	FOXD2	2306	72104	CGI	FALSE	FALSE	TRUE
cg06188019	chr1	3541438	3541439	TPRG1L	127262	-116	CGI	TRUE	FALSE	FALSE
cg06188229	chr1	226411818	226411819	MIXL1	83881	434	CGI	FALSE	TRUE	FALSE
cg06193633	chr1	236958574	236958575	MTR	4548	-5	CGI	TRUE	FALSE	FALSE
cg06193775	chr1	155145882	155145883	KRTCAP2	200185	-77	CGI	TRUE	TRUE	FALSE
cg06194536	chr1	220701829	220701830	MARK1	4139	260	CGI	TRUE	FALSE	FALSE
cg06199750	chr1	1510566	1510567	SSU72	29101	-303	CGI	TRUE	FALSE	FALSE
cg06200512	chr1	235267689	235267690	SNORA14B	677802	23561	CGI	FALSE	FALSE	TRUE
cg06203471	chr1	159750831	159750832	DUSP23	54935	71	CGI	TRUE	TRUE	FALSE
cg06208248	chr1	155232061	155232062	SCAMP3	10067	113	CGI	TRUE	FALSE	FALSE
cg06210887	chr1	156471006	156471007	MEF2D	4209	-476	CGI	TRUE	FALSE	FALSE
cg06211525	chr1	3272131	3272132	ARHGEF16	27237	-99014	CGI-N-Shore	FALSE	TRUE	FALSE
cg06211893	chr1	171810778	171810779	DNM3	26052	156	CGI	TRUE	FALSE	FALSE
cg06214983	chr1	38259501	38259502	MANEAL	149175	-271	CGI	TRUE	FALSE	FALSE
cg06217312	chr1	150552348	150552349	MCL1	4170	-133	CGI	TRUE	FALSE	FALSE
cg06218008	chr1	145589370	145589371	NUDT17	200035	63	CGI	TRUE	FALSE	FALSE
cg06218473	chr1	53164143	53164144	SELRC1	65260	-104	CGI	TRUE	FALSE	FALSE
cg06219592	chr1	28845213	28845214	RCC1	1104	12757	CGI	FALSE	TRUE	FALSE
cg06219821	chr1	12290367	12290368	VPS13D	55187	253	CGI	FALSE	TRUE	FALSE
cg06240849	chr1	47184738	47184739	EFCAB14	9813	-1	CGI	TRUE	FALSE	FALSE
cg06251129	chr1	155990657	155990658	SSR2	6746	99	CGI	FALSE	TRUE	FALSE
cg06267636	chr1	156308293	156308294	CCT3	7203	-86	CGI	TRUE	TRUE	FALSE
cg06268701	chr1	110091083	110091084	GNAI3	2773	-101	CGI	TRUE	FALSE	FALSE
cg06269281	chr1	54355570	54355571	YIPF1	54432	-82	CGI	TRUE	FALSE	FALSE
cg06269322	chr1	154580460	154580461	ADAR	103	19994	CGI	TRUE	TRUE	FALSE
cg06272678	chr1	46599128	46599129	TSPAN1	10103	-41619	CGI-S-Shore	TRUE	TRUE	FALSE
cg06321345	chr1	177150848	177150849	FAM5B	57795	10214	CGI	FALSE	TRUE	FALSE
cg06324094	chr1	153950482	153950483	JTB	10899	-30	CGI	TRUE	FALSE	FALSE
cg06324983	chr1	112281236	112281237	LOC100506343	100506343	-1225	CGI	TRUE	TRUE	FALSE
cg06347212	chr1	228270676	228270677	ARF1	375	314	CGI	TRUE	TRUE	FALSE
cg06347499	chr1	9599419	9599420	SLC25A33	84275	-107	CGI	TRUE	FALSE	FALSE
cg06353127	chr1	240775355	240775356	GREM2	64388	105	CGI	TRUE	FALSE	FALSE
cg06353611	chr1	151138509	151138510	SCNM1	79005	10	CGI	TRUE	TRUE	FALSE
cg06362348	chr1	20126660	20126661	TMCO4	255104	96	CGI	TRUE	TRUE	FALSE
cg06367472	chr1	36916193	36916194	OSCP1	127700	-106	CGI	TRUE	FALSE	FALSE
cg06368569	chr1	33283649	33283650	YARS	8565	-15	CGI	TRUE	TRUE	FALSE
cg06372391	chr1	62785079	62785080	KANK4	163782	2	CGI	TRUE	FALSE	FALSE
cg06377929	chr1	1407001	1407002	ATAD3B	83858	-161	CGI	TRUE	FALSE	FALSE
cg06419659	chr1	153600132	153600133	S100A1	6271	-739	Non-CGI	TRUE	TRUE	FALSE
cg06441968	chr1	40627537	40627538	RLF	6018	495	CGI	FALSE	TRUE	FALSE
cg06442790	chr1	89458396	89458397	RBMXL1	494115	245	CGI	TRUE	FALSE	FALSE
cg06443533	chr1	1182424	1182425	FAM132A	388581	-321	CGI	TRUE	FALSE	FALSE
cg06446937	chr1	26186070	26186071	AUNIP	79000	-221	CGI	TRUE	FALSE	FALSE
cg06509661	chr1	234614745	234614746	TARBP1	6894	102	CGI	TRUE	FALSE	FALSE
cg06523891	chr1	150849149	150849150	ARNT	405	93	CGI	TRUE	FALSE	FALSE
cg06525051	chr1	202927473	202927474	ADIPOR1	51094	225	CGI	TRUE	TRUE	FALSE
cg06528575	chr1	207082828	207082829	IL24	11009	12039	CGI	FALSE	TRUE	FALSE
cg06536150	chr1	2458209	2458210	PANK4	55229	-173	CGI	TRUE	FALSE	FALSE
cg06544141	chr1	27320384	27320385	TRNP1	388610	188	CGI	TRUE	TRUE	FALSE
cg06546406	chr1	39269756	39269757	MYCBP	26292	69292	CGI	FALSE	FALSE	TRUE
cg06622737	chr1	171750501	171750502	METTL13	51603	-258	CGI	TRUE	FALSE	FALSE
cg06622968	chr1	32859605	32859606	BSDC1	55108	455	CGI	FALSE	TRUE	FALSE
cg06623486	chr1	162531613	162531614	UAP1	6675	316	CGI	FALSE	TRUE	FALSE
cg06636527	chr1	144932473	144932474	LOC653513	653513	107517	CGI	TRUE	TRUE	FALSE
cg06637001	chr1	228463634	228463635	OBSCN	84033	67772	CGI	TRUE	TRUE	FALSE
cg06639121	chr1	38156209	38156210	C1orf109	54955	1677	CGI	TRUE	TRUE	FALSE
cg06639387	chr1	228594973	228594974	TRIM11	81559	-455	CGI	TRUE	FALSE	FALSE
cg06639788	chr1	100503523	100503524	HIAT1	64645	-264	CGI	TRUE	FALSE	FALSE
cg06643390	chr1	168106157	168106158	GPR161	23432	662	CGI	TRUE	TRUE	FALSE
cg06646493	chr1	116519019	116519020	SLC22A15	55356	-98	CGI	TRUE	FALSE	FALSE
cg06659614	chr1	152010183	152010184	S100A11	6282	-671	CGI-S-Shore	TRUE	TRUE	FALSE
cg06709324	chr1	179262897	179262898	SOAT1	6646	47	CGI	TRUE	FALSE	FALSE
cg06711176	chr1	44440709	44440710	ATP6V0B	533	106	CGI	TRUE	FALSE	FALSE
cg06712627	chr1	91966606	91966607	CDC7	8317	201	CGI	TRUE	TRUE	FALSE
cg06714284	chr1	235812840	235812841	GNG4	2786	1212	CGI	FALSE	TRUE	FALSE
cg06721528	chr1	40781824	40781825	COL9A2	1298	1234	CGI	FALSE	TRUE	FALSE
cg06744574	chr1	49242359	49242360	BEND5	79656	186	CGI	TRUE	TRUE	FALSE
cg06750832	chr1	111217691	111217692	KCNA3	3738	-35	CGI	TRUE	FALSE	FALSE
cg06752594	chr1	109825964	109825965	PSRC1	84722	-155	CGI	TRUE	FALSE	FALSE
cg06755661	chr1	43919542	43919543	HYI	81888	116	CGI	TRUE	TRUE	FALSE
cg06756667	chr1	205180740	205180741	DSTYK	25778	-12	CGI	TRUE	FALSE	FALSE
cg06758591	chr1	177140203	177140204	FAM5B	57795	-428	CGI	TRUE	FALSE	FALSE
cg06759265	chr1	35351793	35351794	DLGAP3	58512	19189	CGI	FALSE	TRUE	FALSE
cg06760068	chr1	6845484	6845485	CAMTA1	23261	99	CGI	TRUE	FALSE	FALSE
cg06760305	chr1	228566548	228566549	TRIM11	81559	27967	CGI	FALSE	TRUE	FALSE
cg06765909	chr1	36396899	36396900	2003-08-01	192669	579	CGI	TRUE	TRUE	FALSE
cg06770554	chr1	151020549	151020550	C1orf56	54964	289	CGI	TRUE	FALSE	FALSE
cg06775072	chr1	161993546	161993547	OLFML2B	25903	96	CGI	TRUE	FALSE	FALSE
cg06787675	chr1	155051759	155051760	LOC100505666	100505666	-15291	CGI	FALSE	TRUE	FALSE
cg06787764	chr1	46668870	46668871	LURAP1	541468	-134	CGI-N-Shore	TRUE	TRUE	FALSE
cg06788803	chr1	45805948	45805949	MUTYH	4595	192	CGI	TRUE	FALSE	FALSE
cg06790019	chr1	44435457	44435458	DPH2	1802	-194	CGI	TRUE	FALSE	FALSE
cg06796016	chr1	227751612	227751613	ZNF678	339500	391	CGI	FALSE	TRUE	FALSE
cg06796515	chr1	44071036	44071037	KDM4A	9682	-44759	CGI-S-Shore	FALSE	TRUE	FALSE
cg06802365	chr1	225117676	225117677	DNAH14	127602	319	CGI	FALSE	TRUE	FALSE
cg06802655	chr1	43232917	43232918	C1orf50	79078	0	CGI	TRUE	FALSE	FALSE
cg06802841	chr1	145477319	145477320	LIX1L	128077	233	CGI	TRUE	FALSE	FALSE
cg06803925	chr1	173793126	173793127	CENPL	91687	649	CGI	TRUE	TRUE	FALSE
cg06812225	chr1	204485782	204485783	MDM4	4194	274	CGI	FALSE	TRUE	FALSE
cg06812488	chr1	150240787	150240788	APH1A	51107	820	CGI-N-Shore	FALSE	TRUE	FALSE
cg06815194	chr1	155715510	155715511	MSTO2P	100129405	-97	CGI	TRUE	TRUE	FALSE
cg06849719	chr1	205399945	205399946	LEMD1	93273	-8730	CGI	FALSE	FALSE	TRUE
cg06850548	chr1	151138564	151138565	SCNM1	79005	65	CGI	TRUE	TRUE	FALSE
cg06851900	chr1	116915802	116915803	ATP1A1	476	797	CGI	TRUE	TRUE	FALSE
cg06854391	chr1	113499045	113499046	SLC16A1	6566	-69	CGI	TRUE	FALSE	FALSE
cg06854502	chr1	19923593	19923594	C1orf151-NBL1	100532736	121	CGI	TRUE	FALSE	FALSE
cg06859614	chr1	15943968	15943969	DDI2	84301	14	CGI	TRUE	FALSE	FALSE
cg06866616	chr1	2455264	2455265	PANK4	55229	2769	CGI	FALSE	TRUE	FALSE
cg06871311	chr1	178062849	178062850	RASAL2	9462	-13	CGI	TRUE	FALSE	FALSE
cg06875660	chr1	85040134	85040135	CTBS	1486	27	CGI	TRUE	FALSE	FALSE
cg06876479	chr1	222791170	222791171	MIA3	375056	-272	CGI	TRUE	FALSE	FALSE
cg06886207	chr1	211555968	211555969	LINC00467	84791	-127	CGI-N-Shore	TRUE	FALSE	FALSE
cg06888415	chr1	150336129	150336130	RPRD2	23248	-859	CGI-S-Shore	TRUE	FALSE	FALSE
cg06897921	chr1	148176490	148176491	FLJ39739	388685	-88	CGI	TRUE	TRUE	FALSE
cg06899053	chr1	33896703	33896704	PHC2	1912	-87	CGI	TRUE	FALSE	FALSE
cg06934615	chr1	183441736	183441737	SMG7	9887	229	CGI	TRUE	FALSE	FALSE
cg06946154	chr1	246887942	246887943	SCCPDH	51097	563	CGI	FALSE	TRUE	FALSE
cg06951217	chr1	100715402	100715403	DBT	1629	5	CGI	TRUE	FALSE	FALSE
cg06970370	chr1	121261077	121261078	EMBP1	647121	166	CGI	TRUE	FALSE	FALSE
cg06974961	chr1	23543805	23543806	HTR1D	3352	-22582	CGI	FALSE	FALSE	TRUE
cg06985534	chr1	117909609	117909610	MAN1A2	10905	-474	CGI	TRUE	FALSE	FALSE
cg06994324	chr1	65682156	65682157	DNAJC6	9829	-37990	Non-CGI	FALSE	TRUE	FALSE
cg06995549	chr1	43282720	43282721	ERMAP	114625	-54	CGI	TRUE	TRUE	FALSE
cg07011025	chr1	231114438	231114439	TTC13	79573	178	CGI	TRUE	FALSE	FALSE
cg07011115	chr1	145549079	145549080	ANKRD35	148741	-128	CGI	TRUE	FALSE	FALSE
cg07013994	chr1	51433955	51433956	CDKN2C	1031	346	CGI	TRUE	FALSE	FALSE
cg07029873	chr1	217311014	217311015	ESRRG	2104	81	CGI	TRUE	FALSE	FALSE
cg07031542	chr1	214567074	214567075	SMYD2	56950	112508	CGI-S-Shore	FALSE	TRUE	FALSE
cg07033820	chr1	32707210	32707211	MTMR9LP	339483	99	CGI-S-Shore	TRUE	FALSE	FALSE
cg07034850	chr1	23885086	23885087	ID3	3399	1197	CGI	FALSE	TRUE	FALSE
cg07049833	chr1	222791172	222791173	MIA3	375056	-270	CGI	TRUE	FALSE	FALSE
cg07090989	chr1	150241286	150241287	APH1A	51107	321	CGI	TRUE	FALSE	FALSE
cg07092593	chr1	32801733	32801734	MARCKSL1	65108	99	CGI	TRUE	FALSE	FALSE
cg07094487	chr1	46751642	46751643	LRRC41	10489	17394	Non-CGI	FALSE	TRUE	FALSE
cg07104388	chr1	110091050	110091051	GNAI3	2773	-134	CGI	TRUE	FALSE	FALSE
cg07105657	chr1	62902681	62902682	USP1	7398	705	CGI	TRUE	TRUE	FALSE
cg07107171	chr1	175712382	175712383	TNR	7143	368	Non-CGI	TRUE	FALSE	FALSE
cg07114770	chr1	144932136	144932137	LOC653513	653513	107854	CGI	TRUE	TRUE	FALSE
cg07116314	chr1	244998544	244998545	COX20	116228	-93	CGI	TRUE	FALSE	FALSE
cg07135388	chr1	160040411	160040412	KCNJ10	3766	-359	CGI	TRUE	FALSE	FALSE
cg07139317	chr1	11333383	11333384	UBIAD1	29914	127	CGI	TRUE	FALSE	FALSE
cg07142678	chr1	112162349	112162350	LOC100129269	100129269	-11408	CGI	TRUE	TRUE	FALSE
cg07144296	chr1	182584520	182584521	LOC284648	284648	244	CGI	TRUE	FALSE	FALSE
cg07146535	chr1	63782988	63782989	LINC00466	199899	-86	CGI	TRUE	FALSE	FALSE
cg07148880	chr1	200992788	200992789	KIF21B	23046	38	CGI	TRUE	FALSE	FALSE
cg07152001	chr1	109794492	109794493	CELSR2	1952	1850	CGI	TRUE	FALSE	FALSE
cg07155211	chr1	23695625	23695626	C1orf213	148898	160	CGI	TRUE	TRUE	FALSE
cg07166216	chr1	228297154	228297155	MRPL55	128308	-140	CGI	TRUE	FALSE	FALSE
cg07167781	chr1	89357317	89357318	GTF2B	2959	-15	CGI	TRUE	FALSE	FALSE
cg07174389	chr1	212732084	212732085	ATF3	467	-6590	CGI	FALSE	FALSE	TRUE
cg07175367	chr1	36863629	36863630	LSM10	84967	-135	CGI	TRUE	FALSE	FALSE
cg07176146	chr1	35325364	35325365	SMIM12	113444	51	CGI	TRUE	FALSE	FALSE
cg07179759	chr1	19229091	19229092	ALDH4A1	8659	200	CGI	TRUE	FALSE	FALSE
cg07183372	chr1	99127242	99127243	SNX7	51375	5	CGI	TRUE	FALSE	FALSE
cg07195508	chr1	67390935	67390936	MIER1	57708	356	CGI	TRUE	TRUE	FALSE
cg07212644	chr1	114301956	114301957	PHTF1	10745	140	CGI	TRUE	FALSE	FALSE
cg07221967	chr1	18969717	18969718	PAX7	5081	12216	CGI	FALSE	TRUE	FALSE
cg07226980	chr1	227506019	227506020	CDC42BPA	8476	-192	CGI	TRUE	FALSE	FALSE
cg07235071	chr1	151138996	151138997	SCNM1	79005	497	CGI-S-Shore	TRUE	TRUE	FALSE
cg07240937	chr1	153650963	153650964	NPR1	4881	-199	CGI	TRUE	FALSE	FALSE
cg07244326	chr1	161360101	161360102	C1orf192	257177	-22436	CGI	FALSE	FALSE	TRUE
cg07311565	chr1	16400060	16400061	FAM131C	348487	65	CGI	TRUE	FALSE	FALSE
cg07314391	chr1	150602100	150602101	ENSA	2029	-1	CGI	TRUE	FALSE	FALSE
cg07315993	chr1	150186050	150186051	ANP32E	81611	22452	CGI	FALSE	FALSE	TRUE
cg07317551	chr1	40157931	40157932	HPCAL4	51440	-841	CGI	TRUE	FALSE	FALSE
cg07320311	chr1	181057557	181057558	IER5	51278	-79	CGI	TRUE	FALSE	FALSE
cg07342512	chr1	65886002	65886003	LEPR	3953	-127	CGI	TRUE	FALSE	FALSE
cg07344147	chr1	154378025	154378026	IL6R	3570	355	CGI	TRUE	FALSE	FALSE
cg07346077	chr1	197115927	197115928	ASPM	259266	-102	CGI	TRUE	FALSE	FALSE
cg07346851	chr1	160370286	160370287	VANGL2	57216	54	CGI	TRUE	TRUE	FALSE
cg07348009	chr1	2985689	2985690	PRDM16	63976	-51	CGI	TRUE	FALSE	FALSE
cg07351084	chr1	33721459	33721460	ZNF362	149076	-713	CGI	TRUE	FALSE	FALSE
cg07351164	chr1	109826064	109826065	PSRC1	84722	-255	CGI	TRUE	FALSE	FALSE
cg07352425	chr1	15573655	15573656	FHAD1	114827	-111	CGI-N-Shore	TRUE	FALSE	FALSE
cg07354738	chr1	101491561	101491562	DPH5	51611	81	CGI	TRUE	FALSE	FALSE
cg07359730	chr1	67896138	67896139	SERBP1	26135	-14	CGI	TRUE	FALSE	FALSE
cg07361759	chr1	32688314	32688315	TMEM234	56063	-387	CGI	TRUE	TRUE	FALSE
cg07363543	chr1	224691275	224691276	WDR26	80232	-69273	Non-CGI	FALSE	FALSE	TRUE
cg07367434	chr1	40781135	40781136	COL9A2	1298	1923	CGI	FALSE	TRUE	FALSE
cg07374403	chr1	47134188	47134189	ATPAF1	64756	-88	CGI	TRUE	TRUE	FALSE
cg07377740	chr1	40349141	40349142	TRIT1	54802	34	CGI	TRUE	FALSE	FALSE
cg07379140	chr1	95538546	95538547	ALG14	199857	-38	CGI	TRUE	FALSE	FALSE
cg07384903	chr1	21503592	21503593	EIF4G3	8672	-210	CGI	TRUE	FALSE	FALSE
cg07386190	chr1	182361453	182361454	GLUL	2752	-111	CGI	TRUE	FALSE	FALSE
cg07387450	chr1	93646168	93646169	TMED5	50999	76	CGI	TRUE	FALSE	FALSE
cg07393057	chr1	89149638	89149639	PKN2	5586	-282	CGI	TRUE	TRUE	FALSE
cg07398561	chr1	114447571	114447572	AP4B1	10717	168	CGI	TRUE	FALSE	FALSE
cg07400628	chr1	6761934	6761935	DNAJC11	55735	30	CGI	TRUE	FALSE	FALSE
cg07424440	chr1	45453003	45453004	EIF2B3	8891	-641	CGI-S-Shore	TRUE	FALSE	FALSE
cg07424616	chr1	2457414	2457415	PANK4	55229	619	CGI	FALSE	TRUE	FALSE
cg07425541	chr1	236305663	236305664	GPR137B	7107	-167	CGI	TRUE	FALSE	FALSE
cg07453618	chr1	3541082	3541083	TPRG1L	127262	-472	CGI	TRUE	FALSE	FALSE
cg07477187	chr1	155243300	155243301	HCN3	57657	-4072	CGI	TRUE	TRUE	FALSE
cg07478791	chr1	31886160	31886161	SERINC2	347735	3747	CGI	TRUE	TRUE	FALSE
cg07479670	chr1	236227686	236227687	NID1	4811	793	CGI	TRUE	TRUE	FALSE
cg07483064	chr1	8938751	8938752	ENO1-AS1	100505975	-141	CGI	TRUE	FALSE	FALSE
cg07499546	chr1	40839445	40839446	SMAP2	64744	66	CGI	TRUE	FALSE	FALSE
cg07499643	chr1	43424067	43424068	SLC2A1-AS1	440584	-651	CGI	TRUE	TRUE	FALSE
cg07501049	chr1	981392	981393	AGRN	375790	25888	CGI	FALSE	TRUE	FALSE
cg07502168	chr1	214725311	214725312	PTPN14	5784	-286	CGI	TRUE	FALSE	FALSE
cg07533148	chr1	248020812	248020813	TRIM58	25893	310	CGI	TRUE	FALSE	FALSE
cg07551314	chr1	26190155	26190156	AUNIP	79000	-4306	CGI-S-Shelf	TRUE	TRUE	FALSE
cg07556773	chr1	155294010	155294011	RUSC1-AS1	284618	-71	CGI	TRUE	TRUE	FALSE
cg07558682	chr1	43148835	43148836	YBX1	4904	768	CGI	FALSE	TRUE	FALSE
cg07560662	chr1	117113232	117113233	CD58	965	481	CGI	FALSE	TRUE	FALSE
cg07564188	chr1	165667906	165667907	ALDH9A1	223	-5	CGI	TRUE	FALSE	FALSE
cg07566625	chr1	37980778	37980779	MEAF6	64769	-413	CGI	TRUE	FALSE	FALSE
cg07568665	chr1	100598901	100598902	TRMT13	54482	194	CGI	TRUE	TRUE	FALSE
cg07583884	chr1	226111804	226111805	LEFTY1	10637	159	CGI	TRUE	FALSE	FALSE
cg07584845	chr1	9970639	9970640	CTNNBIP1	56998	-322	CGI	TRUE	FALSE	FALSE
cg07590482	chr1	22109175	22109176	USP48	84196	511	CGI	FALSE	TRUE	FALSE
cg07594474	chr1	91966533	91966534	CDC7	8317	128	CGI	TRUE	TRUE	FALSE
cg07596209	chr1	14026618	14026619	PRDM2	7799	-115	CGI	TRUE	FALSE	FALSE
cg07602998	chr1	64240654	64240655	ROR1	4919	963	CGI	FALSE	TRUE	FALSE
cg07603056	chr1	47780160	47780161	STIL	6491	-340	CGI	TRUE	FALSE	FALSE
cg07700258	chr1	228327729	228327730	GUK1	2987	-54	CGI	TRUE	FALSE	FALSE
cg07700962	chr1	174968950	174968951	CACYBP	27101	378	CGI-S-Shore	TRUE	TRUE	FALSE
cg07706442	chr1	84971874	84971875	GNG5	2787	386	CGI	TRUE	TRUE	FALSE
cg07766612	chr1	26372887	26372888	SLC30A2	7780	-282	CGI	TRUE	FALSE	FALSE
cg07784526	chr1	120838320	120838321	FAM72B	653820	-683	CGI	TRUE	FALSE	FALSE
cg07785945	chr1	23346356	23346357	KDM1A	23028	414	CGI	TRUE	FALSE	FALSE
cg07786256	chr1	223254824	223254825	TLR5	7100	61798	CGI	FALSE	FALSE	TRUE
cg07793638	chr1	6675684	6675685	PHF13	148479	1927	CGI	FALSE	TRUE	FALSE
cg07797421	chr1	154833700	154833701	KCNN3	3782	9052	Non-CGI	TRUE	TRUE	FALSE
cg07804111	chr1	151735543	151735544	OAZ3	51686	97	CGI	TRUE	TRUE	FALSE
cg07804481	chr1	200639085	200639086	DDX59	83479	39	CGI	TRUE	FALSE	FALSE
cg07805542	chr1	9779309	9779310	C1orf200	644997	-64664	CGI-N-Shore	FALSE	TRUE	FALSE
cg07807690	chr1	41157266	41157267	NFYC	4802	23	CGI	TRUE	FALSE	FALSE
cg07808546	chr1	52456429	52456430	RAB3B	5865	5	CGI	TRUE	FALSE	FALSE
cg07821496	chr1	151762942	151762943	TDRKH	11022	66	CGI	TRUE	FALSE	FALSE
cg07822305	chr1	116961213	116961214	ATP1A1OS	84852	29	CGI	TRUE	FALSE	FALSE
cg07822469	chr1	182585393	182585394	LOC284648	284648	1117	CGI-S-Shore	TRUE	FALSE	FALSE
cg07823585	chr1	95392682	95392683	CNN3	1266	51	CGI	TRUE	FALSE	FALSE
cg07826235	chr1	167906354	167906355	MPC2	25874	-46	CGI	TRUE	TRUE	FALSE
cg07835254	chr1	65532761	65532762	MIR101-1	406893	-8569	CGI	FALSE	FALSE	TRUE
cg07836592	chr1	8002425	8002426	TNFRSF9	3604	798	CGI-N-Shore	FALSE	TRUE	FALSE
cg07838205	chr1	110091179	110091180	GNAI3	2773	-5	CGI	TRUE	FALSE	FALSE
cg07901143	chr1	3568707	3568708	TP73	7161	-420	CGI	TRUE	FALSE	FALSE
cg07905888	chr1	36023245	36023246	NCDN	23154	-146	CGI	TRUE	TRUE	FALSE
cg07909059	chr1	150039782	150039783	VPS45	11311	439	CGI	TRUE	TRUE	FALSE
cg07911682	chr1	51425659	51425660	FAF1	11124	275	CGI	TRUE	FALSE	FALSE
cg07916071	chr1	151227225	151227226	PSMD4	5710	27	CGI	TRUE	FALSE	FALSE
cg07925615	chr1	235191213	235191214	SNORA14B	677802	100037	Non-CGI	FALSE	FALSE	TRUE
cg07926531	chr1	33546695	33546696	ADC	113451	-17	CGI	TRUE	FALSE	FALSE
cg07944736	chr1	28908226	28908227	SNHG12	85028	155	CGI	TRUE	FALSE	FALSE
cg07945002	chr1	155165037	155165038	MIR92B	693235	68	CGI	TRUE	FALSE	FALSE
cg07945013	chr1	247267325	247267326	ZNF669	79862	347	CGI	TRUE	TRUE	FALSE
cg07952011	chr1	36395998	36395999	2003-08-01	192669	-319	CGI-N-Shore	TRUE	FALSE	FALSE
cg07954828	chr1	47903371	47903372	FOXD2	2306	1681	CGI	TRUE	FALSE	FALSE
cg07958878	chr1	8384595	8384596	SLC45A1	50651	204	CGI	TRUE	FALSE	FALSE
cg07962812	chr1	183441443	183441444	SMG7	9887	-61	CGI	TRUE	FALSE	FALSE
cg07963760	chr1	120612152	120612153	NOTCH2	4853	163	CGI	TRUE	FALSE	FALSE
cg07969588	chr1	110877876	110877877	LOC440600	440600	3915	CGI-N-Shelf	FALSE	TRUE	FALSE
cg07976644	chr1	55266932	55266933	TTC22	55001	7	CGI	TRUE	FALSE	FALSE
cg07996992	chr1	85040343	85040344	CTBS	1486	-179	CGI	TRUE	FALSE	FALSE
cg07998070	chr1	206785660	206785661	EIF2D	1939	242	CGI-N-Shore	TRUE	FALSE	FALSE
cg08006333	chr1	10927110	10927111	CASZ1	54897	-70402	CGI	FALSE	FALSE	TRUE
cg08007338	chr1	180123948	180123949	QSOX1	5768	-18	CGI	TRUE	FALSE	FALSE
cg08033383	chr1	110577378	110577379	STRIP1	85369	3178	CGI	TRUE	TRUE	FALSE
cg08038504	chr1	224803763	224803764	CNIH3	149111	-414	CGI	TRUE	FALSE	FALSE
cg08061330	chr1	20812353	20812354	CAMK2N1	55450	373	CGI	TRUE	FALSE	FALSE
cg08105352	chr1	114695261	114695262	SYT6	148281	1209	CGI	TRUE	TRUE	FALSE
cg08113093	chr1	38019707	38019708	SNIP1	79753	194	CGI	TRUE	FALSE	FALSE
cg08125719	chr1	205012449	205012450	CNTN2	6900	383	CGI	TRUE	TRUE	FALSE
cg08132177	chr1	856685	856686	LOC100130417	100130417	-1867	CGI	TRUE	FALSE	FALSE
cg08135278	chr1	226070709	226070710	TMEM63A	9725	-288	CGI	TRUE	FALSE	FALSE
cg08137080	chr1	16482430	16482431	EPHA2	1969	150	CGI	TRUE	FALSE	FALSE
cg08138025	chr1	36396366	36396367	2003-08-01	192669	46	CGI	TRUE	FALSE	FALSE
cg08138435	chr1	212874634	212874635	BATF3	55509	-1306	CGI-S-Shore	TRUE	FALSE	FALSE
cg08140891	chr1	154955627	154955628	FLAD1	80308	-141	CGI	TRUE	FALSE	FALSE
cg08141342	chr1	45308976	45308977	PTCH2	8643	-359	CGI	TRUE	FALSE	FALSE
cg08161158	chr1	2126151	2126152	C1orf86	199990	13019	CGI	TRUE	TRUE	FALSE
cg08162335	chr1	118148493	118148494	FAM46C	54855	-109	CGI	TRUE	FALSE	FALSE
cg08164852	chr1	28844593	28844594	RCC1	1104	12137	CGI	TRUE	TRUE	FALSE
cg08169827	chr1	32054766	32054767	TINAGL1	64129	12679	CGI	FALSE	FALSE	TRUE
cg08172057	chr1	43919477	43919478	HYI	81888	181	CGI	TRUE	TRUE	FALSE
cg08229358	chr1	179544765	179544766	NPHS2	7827	317	CGI	TRUE	FALSE	FALSE
cg08231251	chr1	27114322	27114323	PIGV	55650	-130	CGI	TRUE	FALSE	FALSE
cg08234308	chr1	65991176	65991177	LEPR	3953	105044	CGI	TRUE	TRUE	FALSE
cg08236358	chr1	151226941	151226942	PSMD4	5710	-254	CGI-N-Shore	TRUE	FALSE	FALSE
cg08243778	chr1	212458726	212458727	PPP2R5A	5525	-151	CGI	TRUE	FALSE	FALSE
cg08244959	chr1	18434774	18434775	IGSF21	84966	533	CGI	FALSE	TRUE	FALSE
cg08246520	chr1	25943862	25943863	MAN1C1	57134	-95	CGI	TRUE	FALSE	FALSE
cg08261032	chr1	23886002	23886003	ID3	3399	281	CGI	TRUE	FALSE	FALSE
cg08263226	chr1	23881409	23881410	ID3	3399	4874	CGI	FALSE	FALSE	TRUE
cg08269986	chr1	35735167	35735168	ZMYM4	9202	598	CGI-S-Shore	FALSE	TRUE	FALSE
cg08275633	chr1	11751631	11751632	MAD2L2	10459	45	CGI	TRUE	FALSE	FALSE
cg08438989	chr1	181999219	181999220	ZNF648	127665	31626	CGI	FALSE	FALSE	TRUE
cg08457409	chr1	100315729	100315730	AGL	178	88	CGI	TRUE	FALSE	FALSE
cg08458292	chr1	57890610	57890611	C8B	732	-458921	CGI	TRUE	TRUE	FALSE
cg08459369	chr1	27560835	27560836	WDTC1	23038	-170	CGI	TRUE	FALSE	FALSE
cg08460435	chr1	109203610	109203611	HENMT1	113802	536	CGI-N-Shore	TRUE	TRUE	FALSE
cg08468991	chr1	109506060	109506061	CLCC1	23155	49	CGI	TRUE	FALSE	FALSE
cg08470185	chr1	1334798	1334799	CCNL2	81669	-79	CGI	TRUE	FALSE	FALSE
cg08471814	chr1	2446073	2446074	PANK4	55229	11960	CGI-S-Shore	FALSE	TRUE	FALSE
cg08473456	chr1	151032324	151032325	MLLT11	10962	172	CGI	TRUE	FALSE	FALSE
cg08479688	chr1	234614740	234614741	TARBP1	6894	107	CGI	TRUE	FALSE	FALSE
cg08526814	chr1	94344811	94344812	DNTTIP2	30836	-48	CGI	TRUE	FALSE	FALSE
cg08532870	chr1	8086308	8086309	ERRFI1	54206	83	CGI	TRUE	FALSE	FALSE
cg08535928	chr1	246952495	246952496	LOC149134	149134	13179	CGI	TRUE	TRUE	FALSE
cg08544041	chr1	193074380	193074381	GLRX2	51022	862	CGI	FALSE	TRUE	FALSE
cg08623154	chr1	154192647	154192648	UBAP2L	9898	-6	CGI-N-Shore	TRUE	TRUE	FALSE
cg08633923	chr1	236959181	236959182	MTR	4548	599	CGI	FALSE	TRUE	FALSE
cg08635130	chr1	33430450	33430451	RNF19B	127544	-163	CGI	TRUE	FALSE	FALSE
cg08643472	chr1	16302298	16302299	ZBTB17	7709	327	CGI	FALSE	TRUE	FALSE
cg08643928	chr1	178694481	178694482	RALGPS2	55103	180	CGI	TRUE	FALSE	FALSE
cg08648409	chr1	39339180	39339181	MYCBP	26292	-129	CGI	TRUE	TRUE	FALSE
cg08649954	chr1	202114133	202114134	ARL8A	127829	-266	CGI	TRUE	FALSE	FALSE
cg08650426	chr1	180471293	180471294	ACBD6	84320	727	CGI-N-Shore	TRUE	FALSE	FALSE
cg08652487	chr1	229569795	229569796	ACTA1	58	46	CGI	TRUE	FALSE	FALSE
cg08655686	chr1	38100087	38100088	RSPO1	284654	506	CGI	FALSE	TRUE	FALSE
cg08661290	chr1	6674110	6674111	PHF13	148479	353	CGI	TRUE	FALSE	FALSE
cg08664810	chr1	92949973	92949974	GFI1	2672	2458	CGI	TRUE	TRUE	FALSE
cg08702399	chr1	44820996	44820997	ERI3	79033	-56	CGI	TRUE	FALSE	FALSE
cg08703055	chr1	2232481	2232482	LOC100129534	100129534	51617	CGI	FALSE	TRUE	FALSE
cg08706732	chr1	29448625	29448626	TMEM200B	399474	1794	CGI	TRUE	TRUE	FALSE
cg08706837	chr1	37940090	37940091	ZC3H12A	80149	-27	CGI	TRUE	FALSE	FALSE
cg08708209	chr1	221915487	221915488	DUSP10	11221	27	CGI	TRUE	FALSE	FALSE
cg08708599	chr1	244893918	244893919	DESI2	51029	77565	CGI	FALSE	FALSE	TRUE
cg08717488	chr1	205238158	205238159	TMCC2	9911	41119	CGI-N-Shore	TRUE	TRUE	FALSE
cg08719467	chr1	146714230	146714231	CHD1L	9557	-59	CGI	TRUE	FALSE	FALSE
cg08721840	chr1	155293541	155293542	RUSC1-AS1	284618	395	CGI	TRUE	TRUE	FALSE
cg08727443	chr1	35331649	35331650	SMIM12	113444	-6231	CGI	FALSE	TRUE	FALSE
cg08738570	chr1	1475265	1475266	TMEM240	339453	473	CGI	FALSE	TRUE	FALSE
cg08755040	chr1	180124539	180124540	QSOX1	5768	570	CGI	FALSE	TRUE	FALSE
cg08831354	chr1	155145252	155145253	TRIM46	80128	-167	CGI-N-Shore	TRUE	TRUE	FALSE
cg08845439	chr1	151512945	151512946	TUFT1	7286	163	CGI	FALSE	TRUE	FALSE
cg08847296	chr1	155278656	155278657	FDPS	2224	116	CGI	TRUE	FALSE	FALSE
cg08855861	chr1	52498679	52498680	KTI12	112970	791	CGI	TRUE	TRUE	FALSE
cg08864381	chr1	1590717	1590718	MMP23B	8510	23156	CGI	TRUE	TRUE	FALSE
cg08869383	chr1	11865661	11865662	MTHFR	4524	497	CGI	TRUE	TRUE	FALSE
cg08879403	chr1	45769557	45769558	LOC400752	400752	-23	CGI	TRUE	FALSE	FALSE
cg08888625	chr1	201508308	201508309	RPS10P7	376693	19275	CGI	FALSE	FALSE	TRUE
cg08893875	chr1	9970636	9970637	CTNNBIP1	56998	-319	CGI	TRUE	FALSE	FALSE
cg08895440	chr1	36184853	36184854	C1orf216	127703	-62	CGI	TRUE	FALSE	FALSE
cg08898653	chr1	20811220	20811221	CAMK2N1	55450	1506	CGI	FALSE	TRUE	FALSE
cg08906442	chr1	246939499	246939500	LOC149134	149134	183	CGI	TRUE	FALSE	FALSE
cg08911820	chr1	110026001	110026002	ATXN7L2	127002	-558	CGI-N-Shore	TRUE	FALSE	FALSE
cg08912058	chr1	6313858	6313859	GPR153	387509	7175	CGI-N-Shore	FALSE	TRUE	FALSE
cg08915090	chr1	202777584	202777585	KDM5B	10765	-34	CGI	TRUE	FALSE	FALSE
cg08926982	chr1	10270439	10270440	KIF1B	23095	-323	CGI	TRUE	FALSE	FALSE
cg08933505	chr1	214724899	214724900	PTPN14	5784	123	CGI	TRUE	FALSE	FALSE
cg08935021	chr1	28832541	28832542	RCC1	1104	85	CGI	TRUE	FALSE	FALSE
cg08939008	chr1	27152775	27152776	ZDHHC18	84243	-424	CGI-N-Shore	TRUE	TRUE	FALSE
cg08944080	chr1	156675950	156675951	CRABP2	1382	-341	CGI	TRUE	FALSE	FALSE
cg08945452	chr1	10854445	10854446	CASZ1	54897	2260	CGI	FALSE	TRUE	FALSE
cg09007163	chr1	27339621	27339622	FAM46B	115572	-287	CGI-S-Shore	TRUE	TRUE	FALSE
cg09008705	chr1	115880865	115880866	NGF	4803	-7	CGI	TRUE	FALSE	FALSE
cg09008891	chr1	231664439	231664440	TSNAX-DISC1	100303453	39	CGI	TRUE	FALSE	FALSE
cg09011945	chr1	206907514	206907515	IL10	3586	38323	Non-CGI	FALSE	TRUE	FALSE
cg09012784	chr1	109584868	109584869	WDR47	22911	-17	CGI	TRUE	FALSE	FALSE
cg09017894	chr1	95285790	95285791	SLC44A3	126969	-109	CGI	TRUE	FALSE	FALSE
cg09020330	chr1	224544535	224544536	CNIH4	29097	-58	CGI	TRUE	FALSE	FALSE
cg09030113	chr1	162531726	162531727	UAP1	6675	429	CGI	FALSE	TRUE	FALSE
cg09036220	chr1	33116718	33116719	RBBP4	5928	-29	CGI	TRUE	FALSE	FALSE
cg09059070	chr1	151584923	151584924	SNX27	81609	260	CGI	TRUE	FALSE	FALSE
cg09061759	chr1	65431709	65431710	JAK1	3716	908	CGI	FALSE	TRUE	FALSE
cg09065776	chr1	214776286	214776287	CENPF	1063	-244	CGI	TRUE	FALSE	FALSE
cg09066439	chr1	147142231	147142232	ACP6	51205	401	CGI	TRUE	FALSE	FALSE
cg09071690	chr1	59012457	59012458	OMA1	115209	-10	CGI	TRUE	FALSE	FALSE
cg09072381	chr1	3817038	3817039	LOC100133612	100133612	69	CGI	TRUE	FALSE	FALSE
cg09106948	chr1	154531641	154531642	UBE2Q1	55585	-520	CGI	TRUE	FALSE	FALSE
cg09107855	chr1	100598443	100598444	SASS6	163786	66	CGI	TRUE	FALSE	FALSE
cg09122657	chr1	9294913	9294914	H6PD	9563	49	CGI	TRUE	FALSE	FALSE
cg09123484	chr1	15853263	15853264	DNAJC16	23341	-87	CGI	TRUE	FALSE	FALSE
cg09126043	chr1	179923661	179923662	CEP350	9857	-245	CGI	TRUE	FALSE	FALSE
cg09129563	chr1	179198950	179198951	ABL2	27	-130	CGI	TRUE	FALSE	FALSE
cg09133422	chr1	155292660	155292661	RUSC1-AS1	284618	1276	CGI	TRUE	TRUE	FALSE
cg09133562	chr1	20126395	20126396	TMCO4	255104	361	CGI	TRUE	TRUE	FALSE
cg09135113	chr1	54304127	54304128	TMEM48	55706	96	CGI	TRUE	FALSE	FALSE
cg09143185	chr1	19923472	19923473	C1orf151-NBL1	100532736	0	CGI	TRUE	FALSE	FALSE
cg09144709	chr1	116915824	116915825	ATP1A1	476	819	CGI	TRUE	TRUE	FALSE
cg09150905	chr1	179851194	179851195	TOR1AIP1	26092	-224	CGI	TRUE	FALSE	FALSE
cg09152047	chr1	110282835	110282836	GSTM3	2947	823	CGI	FALSE	TRUE	FALSE
cg09152582	chr1	88928362	88928363	PKN2	5586	-221558	CGI	FALSE	FALSE	TRUE
cg09163958	chr1	213123886	213123887	VASH2	79805	0	CGI	TRUE	FALSE	FALSE
cg09166705	chr1	151170883	151170884	PIP5K1A	8394	-136	CGI	TRUE	FALSE	FALSE
cg09167119	chr1	218519576	218519577	TGFB2	7042	899	CGI	TRUE	FALSE	FALSE
cg09168548	chr1	32226684	32226685	MIR4254	100423028	-2347	CGI	FALSE	TRUE	FALSE
cg09170051	chr1	19229061	19229062	ALDH4A1	8659	230	CGI	TRUE	FALSE	FALSE
cg09174674	chr1	9884042	9884043	CLSTN1	22883	506	CGI	TRUE	FALSE	FALSE
cg09182375	chr1	22778849	22778850	ZBTB40	9923	504	CGI	FALSE	TRUE	FALSE
cg09185948	chr1	151119527	151119528	SEMA6C	10500	-386	CGI	TRUE	FALSE	FALSE
cg09216375	chr1	8378378	8378379	SLC45A1	50651	-6010	CGI	FALSE	FALSE	TRUE
cg09226051	chr1	247611502	247611503	OR2B11	127623	3780	CGI-N-Shore	FALSE	TRUE	FALSE
cg09228562	chr1	182808478	182808479	DHX9	1660	38	CGI	TRUE	FALSE	FALSE
cg09235837	chr1	180200750	180200751	LHX4	89884	1316	CGI	FALSE	TRUE	FALSE
cg09236098	chr1	1284316	1284317	DVL1	1855	174	CGI	TRUE	FALSE	FALSE
cg09247534	chr1	172502038	172502039	SUCO	51430	-220	CGI	TRUE	FALSE	FALSE
cg09252202	chr1	16693913	16693914	SZRD1	26099	329	CGI	FALSE	TRUE	FALSE
cg09258327	chr1	236305010	236305011	GPR137B	7107	-820	CGI	TRUE	FALSE	FALSE
cg09260603	chr1	206809102	206809103	DYRK3	8444	220	CGI	TRUE	FALSE	FALSE
cg09265377	chr1	245320016	245320017	KIF26B	55083	1728	CGI	FALSE	TRUE	FALSE
cg09268877	chr1	46152820	46152821	GPBP1L1	60313	-517	CGI	TRUE	FALSE	FALSE
cg09273119	chr1	35324774	35324775	SMIM12	113444	641	CGI-N-Shore	TRUE	TRUE	FALSE
cg09275000	chr1	153950158	153950159	JTB	10899	291	CGI	TRUE	FALSE	FALSE
cg09312767	chr1	29063505	29063506	YTHDF2	51441	371	CGI	TRUE	TRUE	FALSE
cg09315878	chr1	1152580	1152581	TNFRSF4	7293	-3031	CGI	FALSE	TRUE	FALSE
cg09318066	chr1	23884972	23884973	ID3	3399	1311	CGI	FALSE	TRUE	FALSE
cg09318375	chr1	67218090	67218091	TCTEX1D1	200132	-48	CGI	TRUE	FALSE	FALSE
cg09319202	chr1	111506715	111506716	LRIF1	55791	-148	CGI	TRUE	FALSE	FALSE
cg09320113	chr1	186799481	186799482	PLA2G4A	5321	1448	Non-CGI	FALSE	TRUE	FALSE
cg09323228	chr1	45965727	45965728	CCDC163P	126661	22	CGI	TRUE	FALSE	FALSE
cg09330979	chr1	114302082	114302083	PHTF1	10745	14	CGI	TRUE	FALSE	FALSE
cg09335306	chr1	169863169	169863170	SCYL3	57147	-92	CGI	TRUE	FALSE	FALSE
cg09352372	chr1	212838765	212838766	BATF3	55509	34560	CGI-N-Shore	FALSE	FALSE	TRUE
cg09358240	chr1	185126285	185126286	TRMT1L	81627	-54	CGI	TRUE	FALSE	FALSE
cg09361488	chr1	12677666	12677667	DHRS3	9249	152	CGI	TRUE	FALSE	FALSE
cg09363564	chr1	169337483	169337484	BLZF1	8548	288	CGI	TRUE	FALSE	FALSE
cg09363587	chr1	202183264	202183265	LGR6	59352	20145	CGI	TRUE	TRUE	FALSE
cg09372755	chr1	43919584	43919585	HYI	81888	74	CGI-S-Shore	TRUE	TRUE	FALSE
cg09372928	chr1	6845395	6845396	CAMTA1	23261	10	CGI	TRUE	FALSE	FALSE
cg09373211	chr1	154193749	154193750	C1orf43	25912	-475	CGI	TRUE	TRUE	FALSE
cg09414045	chr1	110162465	110162466	AMPD2	271	338	CGI	TRUE	TRUE	FALSE
cg09414948	chr1	16490791	16490792	EPHA2	1969	-8208	CGI-S-Shore	FALSE	FALSE	TRUE
cg09471221	chr1	94344512	94344513	DNTTIP2	30836	248	CGI	FALSE	TRUE	FALSE
cg09478268	chr1	111991669	111991670	WDR77	79084	159	CGI	TRUE	TRUE	FALSE
cg09500475	chr1	46152117	46152118	GPBP1L1	60313	183	CGI	TRUE	FALSE	FALSE
cg09501274	chr1	43233067	43233068	C1orf50	79078	150	CGI	TRUE	TRUE	FALSE
cg09509035	chr1	235490977	235490978	ARID4B	51742	553	CGI	TRUE	TRUE	FALSE
cg09511914	chr1	20878928	20878929	FAM43B	163933	-2	CGI	TRUE	FALSE	FALSE
cg09513672	chr1	28908770	28908771	SNHG12	85028	-386	CGI	TRUE	FALSE	FALSE
cg09517873	chr1	12656315	12656316	DHRS3	9249	21503	CGI	TRUE	TRUE	FALSE
cg09551172	chr1	100315427	100315428	AGL	178	-211	CGI-N-Shore	TRUE	FALSE	FALSE
cg09556632	chr1	40839764	40839765	SMAP2	64744	385	CGI	TRUE	FALSE	FALSE
cg09586322	chr1	32706085	32706086	MTMR9LP	339483	1224	CGI	TRUE	TRUE	FALSE
cg09685705	chr1	31274766	31274767	LAPTM5	7805	-44082	Non-CGI	FALSE	FALSE	TRUE
cg09686317	chr1	57111122	57111123	PRKAA2	5563	131	CGI	TRUE	FALSE	FALSE
cg09755617	chr1	36173937	36173938	C1orf216	127703	10851	CGI	FALSE	FALSE	TRUE
cg09756525	chr1	32707133	32707134	MTMR9LP	339483	176	CGI	TRUE	FALSE	FALSE
cg09765586	chr1	155294051	155294052	RUSC1-AS1	284618	-112	CGI	TRUE	TRUE	FALSE
cg09767598	chr1	220960017	220960018	MARC1	64757	-20	CGI-N-Shore	TRUE	FALSE	FALSE
cg09786013	chr1	220864119	220864120	C1orf115	79762	490	CGI	FALSE	TRUE	FALSE
cg09789536	chr1	896226	896227	KLHL17	339451	258	CGI	TRUE	TRUE	FALSE
cg09791324	chr1	154973945	154973946	ZBTB7B	51043	-1159	CGI	TRUE	FALSE	FALSE
cg09799690	chr1	247267708	247267709	ZNF669	79862	-33	CGI	TRUE	FALSE	FALSE
cg09801936	chr1	102462632	102462633	OLFM3	118427	156	CGI	TRUE	FALSE	FALSE
cg09805553	chr1	153895607	153895608	GATAD2B	57459	-155	CGI	TRUE	FALSE	FALSE
cg09806118	chr1	209958030	209958031	C1orf74	148304	-139	CGI	TRUE	FALSE	FALSE
cg09806633	chr1	36689896	36689897	THRAP3	9967	-119	CGI	TRUE	FALSE	FALSE
cg09808343	chr1	150266643	150266644	MRPS21	54460	373	CGI	TRUE	TRUE	FALSE
cg09809474	chr1	1840100	1840101	CALML6	163688	-6164	CGI	FALSE	FALSE	TRUE
cg09822051	chr1	150039084	150039085	VPS45	11311	-256	CGI	TRUE	FALSE	FALSE
cg09822538	chr1	107682798	107682799	NTNG1	22854	168	CGI	TRUE	FALSE	FALSE
cg09827532	chr1	42801087	42801088	FOXJ3	22887	459	CGI	TRUE	TRUE	FALSE
cg09827752	chr1	2461823	2461824	HES5	388585	-138	CGI	TRUE	FALSE	FALSE
cg09845133	chr1	95699825	95699826	RWDD3	25950	113	CGI	TRUE	TRUE	FALSE
cg09852199	chr1	203764897	203764898	ZC3H11A	9877	145	CGI	TRUE	FALSE	FALSE
cg09854746	chr1	168195074	168195075	SFT2D2	375035	-179	CGI	TRUE	FALSE	FALSE
cg09857259	chr1	201798166	201798167	IPO9	55705	-120	CGI-N-Shore	TRUE	FALSE	FALSE
cg09867184	chr1	153939684	153939685	SLC39A1	27173	502	CGI	TRUE	TRUE	FALSE
cg09867230	chr1	154972398	154972399	ZBTB7B	51043	-2706	CGI	FALSE	FALSE	TRUE
cg09889216	chr1	202777618	202777619	KDM5B	10765	-68	CGI	TRUE	FALSE	FALSE
cg09892426	chr1	241587493	241587494	RGS7	6000	-67014	CGI	FALSE	FALSE	TRUE
cg09896346	chr1	23751195	23751196	TCEA3	6920	64	CGI	TRUE	FALSE	FALSE
cg09897639	chr1	178063342	178063343	RASAL2-AS1	100302401	-213	CGI	TRUE	FALSE	FALSE
cg09898154	chr1	54665660	54665661	CYB5RL	606495	84	CGI	TRUE	FALSE	FALSE
cg09901932	chr1	62902081	62902082	USP1	7398	105	CGI	TRUE	FALSE	FALSE
cg09933215	chr1	31360239	31360240	SDC3	9672	21239	Non-CGI	FALSE	TRUE	FALSE
cg09938328	chr1	39325620	39325621	MYCBP	26292	13428	CGI	TRUE	TRUE	FALSE
cg09940756	chr1	226069930	226069931	TMEM63A	9725	488	CGI	FALSE	TRUE	FALSE
cg09988380	chr1	151431765	151431766	POGZ	23126	174	CGI	TRUE	FALSE	FALSE
cg09992883	chr1	41827373	41827374	SCMH1	22955	-119557	CGI	FALSE	FALSE	TRUE
cg10009930	chr1	9599403	9599404	SLC25A33	84275	-123	CGI	TRUE	FALSE	FALSE
cg10012640	chr1	92351216	92351217	TGFBR3	7049	20341	CGI	FALSE	TRUE	FALSE
cg10014674	chr1	33430585	33430586	RNF19B	127544	-298	CGI-S-Shore	TRUE	FALSE	FALSE
cg10021668	chr1	159751259	159751260	DUSP23	54935	499	CGI	FALSE	TRUE	FALSE
cg10022873	chr1	95699865	95699866	RWDD3	25950	153	CGI	TRUE	TRUE	FALSE
cg10025645	chr1	171711780	171711781	VAMP4	8674	-400	CGI	TRUE	FALSE	FALSE
cg10025945	chr1	111682281	111682282	CEPT1	10390	31	CGI	TRUE	TRUE	FALSE
cg10026473	chr1	45792540	45792541	HPDL	84842	-3	CGI	TRUE	FALSE	FALSE
cg10027085	chr1	213188722	213188723	ANGEL2	90806	444	CGI	TRUE	TRUE	FALSE
cg10057252	chr1	110036897	110036898	CYB561D1	284613	238	CGI	TRUE	TRUE	FALSE
cg10057318	chr1	91966336	91966337	CDC7	8317	-66	CGI	TRUE	FALSE	FALSE
cg10057631	chr1	204380960	204380961	PPP1R15B	84919	-15	CGI	TRUE	FALSE	FALSE
cg10062141	chr1	91172710	91172711	BARHL2	343472	10082	CGI	FALSE	FALSE	TRUE
cg10062258	chr1	65885702	65885703	LEPR	3953	-427	CGI-N-Shore	TRUE	FALSE	FALSE
cg10074513	chr1	3541656	3541657	TPRG1L	127262	99	CGI	TRUE	FALSE	FALSE
cg10092158	chr1	151584907	151584908	SNX27	81609	244	CGI	TRUE	FALSE	FALSE
cg10096873	chr1	92546470	92546471	BTBD8	284697	607	CGI	FALSE	TRUE	FALSE
cg10101749	chr1	40420689	40420690	MFSD2A	84879	-93	CGI	TRUE	FALSE	FALSE
cg10103442	chr1	222638853	222638854	HHIPL2	79802	82589	CGI	FALSE	FALSE	TRUE
cg10103446	chr1	77685150	77685151	PIGK	10026	-17	CGI	TRUE	FALSE	FALSE
cg10104810	chr1	120612147	120612148	NOTCH2	4853	168	CGI	TRUE	FALSE	FALSE
cg10107779	chr1	235491363	235491364	ARID4B	51742	167	CGI	TRUE	FALSE	FALSE
cg10108250	chr1	110026138	110026139	ATXN7L2	127002	-421	CGI-N-Shore	TRUE	FALSE	FALSE
cg10117795	chr1	2574549	2574550	MMEL1	79258	-10067	CGI	FALSE	TRUE	FALSE
cg10117958	chr1	161719605	161719606	DUSP12	11266	23	CGI	TRUE	FALSE	FALSE
cg10118002	chr1	6296095	6296096	ICMT	23463	-50	CGI	TRUE	FALSE	FALSE
cg10119933	chr1	174968457	174968458	CACYBP	27101	-112	CGI	TRUE	FALSE	FALSE
cg10122302	chr1	6051558	6051559	KCNAB2	8514	-798	CGI	TRUE	TRUE	FALSE
cg10126409	chr1	170633380	170633381	PRRX1	5396	66	CGI	TRUE	FALSE	FALSE
cg10126715	chr1	37500195	37500196	GRIK3	2899	-350	CGI	TRUE	FALSE	FALSE
cg10130860	chr1	43124230	43124231	PPIH	10465	181	CGI	TRUE	TRUE	FALSE
cg10176463	chr1	940782	940783	HES4	57801	-5229	CGI-N-Shore	FALSE	FALSE	TRUE
cg10178263	chr1	145473631	145473632	ANKRD34A	284615	3122	CGI	TRUE	TRUE	FALSE
cg10180406	chr1	186649877	186649878	PTGS2	5743	-317	CGI	TRUE	FALSE	FALSE
cg10200477	chr1	87801011	87801012	LMO4	8543	6859	CGI	FALSE	TRUE	FALSE
cg10202233	chr1	249168142	249168143	ZNF692	55657	-14826	CGI	TRUE	FALSE	FALSE
cg10204695	chr1	111991555	111991556	ATP5F1	515	92	CGI	TRUE	TRUE	FALSE
cg10205642	chr1	38019950	38019951	SNIP1	79753	-46	CGI	TRUE	FALSE	FALSE
cg10207527	chr1	894257	894258	NOC2L	26155	420	CGI	TRUE	TRUE	FALSE
cg10210571	chr1	231664364	231664365	TSNAX-DISC1	100303453	-33	CGI	TRUE	FALSE	FALSE
cg10210594	chr1	208132787	208132788	CD34	947	-48103	CGI	FALSE	FALSE	TRUE
cg10211861	chr1	59762176	59762177	FGGY	55277	-447	CGI	TRUE	FALSE	FALSE
cg10212705	chr1	154297848	154297849	ATP8B2	57198	-186	CGI	TRUE	FALSE	FALSE
cg10220895	chr1	228464137	228464138	OBSCN	84033	68275	CGI	TRUE	TRUE	FALSE
cg10225325	chr1	167683897	167683898	MPZL1	9019	-7288	CGI	TRUE	FALSE	FALSE
cg10228307	chr1	72747802	72747803	NEGR1	257194	601	CGI-N-Shore	FALSE	TRUE	FALSE
cg10228629	chr1	1406955	1406956	ATAD3B	83858	-207	CGI	TRUE	FALSE	FALSE
cg10228777	chr1	14925424	14925425	KAZN	23254	210	CGI	TRUE	FALSE	FALSE
cg10231742	chr1	111991923	111991924	WDR77	79084	-92	CGI	TRUE	TRUE	FALSE
cg10233455	chr1	11072622	11072623	TARDBP	23435	-55	CGI	TRUE	FALSE	FALSE
cg10234068	chr1	152083276	152083277	TCHHL1	126637	-21735	CGI	FALSE	TRUE	FALSE
cg10234282	chr1	207975342	207975343	MIR29C	407026	524	Non-CGI	TRUE	TRUE	FALSE
cg10240684	chr1	182808315	182808316	DHX9	1660	-122	CGI	TRUE	FALSE	FALSE
cg10241147	chr1	26147310	26147311	MTFR1L	56181	912	CGI	TRUE	TRUE	FALSE
cg10241280	chr1	169863088	169863089	SCYL3	57147	-11	CGI	TRUE	FALSE	FALSE
cg10248492	chr1	228647248	228647249	HIST3H2BB	128312	1439	CGI	TRUE	FALSE	FALSE
cg10283690	chr1	245027135	245027136	HNRNPU	3192	690	CGI	TRUE	FALSE	FALSE
cg10307600	chr1	33430314	33430315	RNF19B	127544	-27	CGI	TRUE	FALSE	FALSE
cg10311240	chr1	200639202	200639203	DDX59	83479	-75	CGI	TRUE	FALSE	FALSE
cg10313417	chr1	40420809	40420810	MFSD2A	84879	24	CGI	TRUE	FALSE	FALSE
cg10316490	chr1	190445197	190445198	FAM5C	339479	1560	CGI	TRUE	TRUE	FALSE
cg10316635	chr1	62208645	62208646	INADL	10207	495	CGI	FALSE	TRUE	FALSE
cg10318121	chr1	161172291	161172292	NDUFS2	4720	3185	CGI	TRUE	TRUE	FALSE
cg10322360	chr1	10535135	10535136	PEX14	5195	131	CGI	FALSE	TRUE	FALSE
cg10325398	chr1	45476990	45476991	HECTD3	79654	35	CGI	TRUE	FALSE	FALSE
cg10325600	chr1	220101785	220101786	SLC30A10	55532	30202	CGI	TRUE	TRUE	FALSE
cg10327276	chr1	6762116	6762117	DNAJC11	55735	-149	CGI	TRUE	FALSE	FALSE
cg10330832	chr1	246729585	246729586	TFB2M	64216	-19	CGI	TRUE	FALSE	FALSE
cg10333268	chr1	231004326	231004327	C1orf198	84886	1007	CGI	TRUE	TRUE	FALSE
cg10387458	chr1	93645817	93645818	TMED5	50999	427	CGI	TRUE	FALSE	FALSE
cg10390174	chr1	156675491	156675492	CRABP2	1382	115	CGI	TRUE	TRUE	FALSE
cg10409799	chr1	154600487	154600488	ADAR	103	-30	CGI	TRUE	FALSE	FALSE
cg10441013	chr1	160039990	160039991	KCNJ10	3766	59	CGI	TRUE	FALSE	FALSE
cg10445911	chr1	154971922	154971923	ZBTB7B	51043	-3182	CGI	FALSE	FALSE	TRUE
cg10483461	chr1	170043670	170043671	KIFAP3	22920	207	CGI	TRUE	FALSE	FALSE
cg10490227	chr1	40348903	40348904	TRIT1	54802	272	CGI	FALSE	TRUE	FALSE
cg10491652	chr1	156052205	156052206	LMNA	4000	-162	CGI	TRUE	FALSE	FALSE
cg10494282	chr1	44440945	44440946	ATP6V0B	533	342	CGI	TRUE	TRUE	FALSE
cg10495392	chr1	46806563	46806564	NSUN4	387338	172	CGI	TRUE	FALSE	FALSE
cg10499176	chr1	54965096	54965097	ACOT11	26027	-42832	CGI	FALSE	FALSE	TRUE
cg10504108	chr1	17294752	17294753	MFAP2	4237	13327	Non-CGI	TRUE	TRUE	FALSE
cg10505247	chr1	207226475	207226476	YOD1	55432	-149	CGI	TRUE	TRUE	FALSE
cg10515414	chr1	15650268	15650269	FHAD1	114827	76499	CGI-N-Shelf	FALSE	TRUE	FALSE
cg10518858	chr1	228594884	228594885	TRIM11	81559	-366	CGI	TRUE	FALSE	FALSE
cg10519082	chr1	245026741	245026742	HNRNPU	3192	1084	CGI	FALSE	TRUE	FALSE
cg10519406	chr1	197115545	197115546	ASPM	259266	277	CGI	TRUE	FALSE	FALSE
cg10519709	chr1	204347359	204347360	LINC00628	127841	-8511	CGI	FALSE	FALSE	TRUE
cg10530135	chr1	21022984	21022985	KIF17	57576	21331	CGI-N-Shore	FALSE	TRUE	FALSE
cg10530644	chr1	212965113	212965114	NSL1	25936	24	CGI	TRUE	FALSE	FALSE
cg10531737	chr1	247494767	247494768	ZNF496	84838	276	CGI	TRUE	FALSE	FALSE
cg10538929	chr1	22149812	22149813	LDLRAD2	401944	11053	CGI	FALSE	TRUE	FALSE
cg10539371	chr1	160313075	160313076	NCSTN	23385	11	CGI	TRUE	FALSE	FALSE
cg10539565	chr1	26560674	26560675	CEP85	64793	-17	CGI	TRUE	FALSE	FALSE
cg10555159	chr1	19971172	19971173	NBL1	4681	1448	CGI	TRUE	TRUE	FALSE
cg10555853	chr1	33516627	33516628	AK2	204	-14114	CGI	FALSE	FALSE	TRUE
cg10556076	chr1	166845741	166845742	TADA1	117143	-86	CGI	TRUE	FALSE	FALSE
cg10584797	chr1	26126588	26126589	SEPN1	57190	-77	CGI	TRUE	FALSE	FALSE
cg10592690	chr1	46769564	46769565	UQCRH	7388	183	CGI	TRUE	TRUE	FALSE
cg10594585	chr1	153756109	153756110	SLC27A3	11000	8340	CGI	FALSE	FALSE	TRUE
cg10632266	chr1	167691116	167691117	MPZL1	9019	-69	CGI	TRUE	FALSE	FALSE
cg10634096	chr1	156475258	156475259	MEF2D	4209	-4728	CGI	FALSE	FALSE	TRUE
cg10634619	chr1	3663435	3663436	TP73-AS1	57212	500	CGI	TRUE	FALSE	FALSE
cg10636391	chr1	45672074	45672075	ZSWIM5	57643	174	CGI	TRUE	FALSE	FALSE
cg10703813	chr1	29214067	29214068	EPB41	2035	463	CGI	FALSE	TRUE	FALSE
cg10708588	chr1	23810816	23810817	ASAP3	55616	239	CGI	TRUE	TRUE	FALSE
cg10709494	chr1	115323130	115323131	SIKE1	80143	176	CGI	TRUE	FALSE	FALSE
cg10711209	chr1	179545155	179545156	NPHS2	7827	-70	CGI	TRUE	FALSE	FALSE
cg10715425	chr1	6052497	6052498	NPHP4	261734	34	CGI	TRUE	FALSE	FALSE
cg10718813	chr1	90460949	90460950	ZNF326	284695	270	CGI	TRUE	TRUE	FALSE
cg10730174	chr1	170633559	170633560	PRRX1	5396	245	CGI	TRUE	FALSE	FALSE
cg10762109	chr1	48463113	48463114	TRABD2B	388630	-550	CGI	TRUE	FALSE	FALSE
cg10773309	chr1	32229411	32229412	BAI2	576	235	CGI	FALSE	TRUE	FALSE
cg10780495	chr1	8939136	8939137	ENO1	2023	13	CGI	TRUE	TRUE	FALSE
cg10781972	chr1	14075362	14075363	PRDM2	7799	48626	CGI	TRUE	TRUE	FALSE
cg10784298	chr1	46269397	46269398	MAST2	23139	111	CGI	TRUE	FALSE	FALSE
cg10798048	chr1	16399867	16399868	FAM131C	348487	258	CGI	FALSE	TRUE	FALSE
cg10803251	chr1	43312031	43312032	ZNF691	51058	-211	CGI	TRUE	FALSE	FALSE
cg10811340	chr1	183604510	183604511	ARPC5	10092	473	CGI	TRUE	TRUE	FALSE
cg10827893	chr1	214161368	214161369	PROX1	5629	81	CGI	TRUE	FALSE	FALSE
cg10829264	chr1	156024440	156024441	LAMTOR2	28956	-75	CGI	TRUE	FALSE	FALSE
cg10832495	chr1	92952103	92952104	GFI1	2672	328	CGI	TRUE	TRUE	FALSE
cg10835423	chr1	112162393	112162394	LOC100129269	100129269	-11452	CGI	TRUE	TRUE	FALSE
cg10837265	chr1	26758824	26758825	DHDDS	79947	50	CGI	TRUE	FALSE	FALSE
cg10842753	chr1	32757631	32757632	HDAC1	3065	-75	CGI	TRUE	FALSE	FALSE
cg10873475	chr1	65432386	65432387	JAK1	3716	231	CGI	TRUE	TRUE	FALSE
cg10877147	chr1	9648619	9648620	TMEM201	199953	-311	CGI	TRUE	FALSE	FALSE
cg10881360	chr1	24069720	24069721	TCEB3	6924	-134	CGI	TRUE	FALSE	FALSE
cg10892866	chr1	154934115	154934116	PYGO2	90780	141	CGI	TRUE	FALSE	FALSE
cg10895022	chr1	59235119	59235120	JUN	3725	14664	CGI	FALSE	FALSE	TRUE
cg10943191	chr1	1850414	1850415	TMEM52	339456	324	CGI	TRUE	TRUE	FALSE
cg10949451	chr1	6673306	6673307	PHF13	148479	-448	CGI	TRUE	FALSE	FALSE
cg10953131	chr1	17997665	17997666	ACTL8	81569	-84141	Non-CGI	FALSE	TRUE	FALSE
cg10954985	chr1	155051156	155051157	LOC100505666	100505666	-14688	CGI-N-Shore	TRUE	TRUE	FALSE
cg10955293	chr1	24117561	24117562	LYPLA2	11313	-83	CGI	TRUE	FALSE	FALSE
cg10957254	chr1	54411942	54411943	LRRC42	115353	-93	CGI	TRUE	FALSE	FALSE
cg10961551	chr1	84764612	84764613	SAMD13	148418	562	CGI	FALSE	TRUE	FALSE
cg10961604	chr1	27709771	27709772	CD164L2	388611	32	CGI	TRUE	FALSE	FALSE
cg10966083	chr1	220701817	220701818	MARK1	4139	248	CGI	TRUE	FALSE	FALSE
cg10971895	chr1	201438445	201438446	PHLDA3	23612	-145	CGI	TRUE	FALSE	FALSE
cg10993459	chr1	33177924	33177925	SYNC	81493	-9562	CGI-N-Shore	FALSE	FALSE	TRUE
cg11019437	chr1	221916662	221916663	DUSP10	11221	-1145	CGI	TRUE	FALSE	FALSE
cg11067756	chr1	161993675	161993676	OLFML2B	25903	-30	CGI	TRUE	FALSE	FALSE
cg11073926	chr1	43855438	43855439	MED8	112950	43	CGI	TRUE	FALSE	FALSE
cg11079823	chr1	76190140	76190141	ACADM	34	96	CGI	TRUE	FALSE	FALSE
cg11086275	chr1	180991441	180991442	STX6	10228	603	CGI	FALSE	TRUE	FALSE
cg11132352	chr1	161719642	161719643	DUSP12	11266	60	CGI	TRUE	FALSE	FALSE
cg11135003	chr1	225998164	225998165	EPHX1	2052	366	CGI	FALSE	TRUE	FALSE
cg11135720	chr1	47779824	47779825	STIL	6491	-4	CGI	TRUE	FALSE	FALSE
cg11141156	chr1	15251288	15251289	TMEM51-AS1	200197	227670	CGI	FALSE	TRUE	FALSE
cg11144217	chr1	1027520	1027521	RNF223	401934	-17832	CGI-S-Shore	TRUE	TRUE	FALSE
cg11159084	chr1	236767889	236767890	HEATR1	55127	-47	CGI	TRUE	FALSE	FALSE
cg11163777	chr1	27693474	27693475	MAP3K6	9064	-136	CGI	TRUE	FALSE	FALSE
cg11166348	chr1	7740267	7740268	VAMP3	9341	-91060	CGI	TRUE	TRUE	FALSE
cg11167537	chr1	32827430	32827431	FAM229A	100128071	412	CGI	TRUE	TRUE	FALSE
cg11185975	chr1	155715418	155715419	MSTO2P	100129405	-189	CGI	TRUE	TRUE	FALSE
cg11196904	chr1	10491304	10491305	APITD1-CORT	100526739	1144	CGI	TRUE	TRUE	FALSE
cg11201606	chr1	40254644	40254645	BMP8B	656	-110	CGI	TRUE	FALSE	FALSE
cg11202785	chr1	94884090	94884091	ABCD3	5825	156	CGI	TRUE	FALSE	FALSE
cg11206482	chr1	151170856	151170857	PIP5K1A	8394	-163	CGI	TRUE	FALSE	FALSE
cg11207852	chr1	91966655	91966656	CDC7	8317	250	CGI	TRUE	TRUE	FALSE
cg11215976	chr1	236849942	236849943	ACTN2	88	171	CGI	TRUE	FALSE	FALSE
cg11217193	chr1	12538341	12538342	SNORA59B	677882	-28957	CGI-N-Shore	FALSE	TRUE	FALSE
cg11219407	chr1	154531432	154531433	UBE2Q1	55585	-311	CGI	TRUE	FALSE	FALSE
cg11222527	chr1	226926964	226926965	ITPKB	3707	-87	CGI	TRUE	FALSE	FALSE
cg11225849	chr1	211500348	211500349	TRAF5	7188	390	CGI	FALSE	TRUE	FALSE
cg11227645	chr1	224544764	224544765	CNIH4	29097	168	CGI	FALSE	TRUE	FALSE
cg11228876	chr1	236227653	236227654	NID1	4811	826	CGI	TRUE	TRUE	FALSE
cg11235344	chr1	220701359	220701360	MARK1	4139	-207	CGI	TRUE	FALSE	FALSE
cg11237426	chr1	179545166	179545167	NPHS2	7827	-81	CGI	TRUE	FALSE	FALSE
cg11240755	chr1	26147348	26147349	MTFR1L	56181	950	CGI	TRUE	TRUE	FALSE
cg11242303	chr1	67773725	67773726	IL12RB2	3595	677	CGI	FALSE	TRUE	FALSE
cg11243683	chr1	202183605	202183606	LGR6	59352	20486	CGI	FALSE	TRUE	FALSE
cg11245657	chr1	11714873	11714874	FBXO2	26232	13	CGI	TRUE	TRUE	FALSE
cg11246695	chr1	145576023	145576024	PIAS3	10401	732	CGI	TRUE	TRUE	FALSE
cg11246731	chr1	231664302	231664303	TSNAX-DISC1	100303453	-95	CGI	TRUE	FALSE	FALSE
cg11248715	chr1	63787928	63787929	FOXD3	27022	-800	CGI	TRUE	FALSE	FALSE
cg11251232	chr1	93811340	93811341	LOC100131564	100131564	26	CGI	TRUE	FALSE	FALSE
cg11251349	chr1	33721607	33721608	ZNF362	149076	-565	CGI	TRUE	FALSE	FALSE
cg11279444	chr1	53099053	53099054	FAM159A	348378	-11	CGI	TRUE	FALSE	FALSE
cg11333835	chr1	23495430	23495431	LUZP1	7798	8869	CGI	TRUE	TRUE	FALSE
cg11335495	chr1	27216927	27216928	GPN2	54707	-57	CGI	TRUE	TRUE	FALSE
cg11341527	chr1	84971853	84971854	GNG5	2787	407	CGI	TRUE	TRUE	FALSE
cg11342332	chr1	10271217	10271218	KIF1B	23095	452	CGI	TRUE	TRUE	FALSE
cg11343894	chr1	153599704	153599705	S100A1	6271	-1167	Non-CGI	TRUE	TRUE	FALSE
cg11346541	chr1	228327680	228327681	GUK1	2987	-103	CGI	TRUE	FALSE	FALSE
cg11378242	chr1	244999800	244999801	COX20	116228	1160	CGI-S-Shore	FALSE	TRUE	FALSE
cg11379360	chr1	220263525	220263526	BPNT1	10380	-333	CGI-S-Shore	TRUE	TRUE	FALSE
cg11382055	chr1	233749410	233749411	KCNK1	3775	-338	CGI	TRUE	FALSE	FALSE
cg11382799	chr1	27930097	27930098	AHDC1	27245	262	CGI	TRUE	TRUE	FALSE
cg11384512	chr1	236767612	236767613	HEATR1	55127	227	CGI	FALSE	TRUE	FALSE
cg11386025	chr1	41284582	41284583	KCNQ4	9132	34897	CGI	FALSE	TRUE	FALSE
cg11388258	chr1	151484008	151484009	CGN	57530	145	CGI	FALSE	TRUE	FALSE
cg11391637	chr1	39249315	39249316	MYCBP	26292	89733	CGI-N-Shore	FALSE	FALSE	TRUE
cg11392667	chr1	165567492	165567493	LOC400794	400794	-16150	CGI	FALSE	FALSE	TRUE
cg11395536	chr1	150521958	150521959	ADAMTSL4	54507	59	CGI	TRUE	FALSE	FALSE
cg11396951	chr1	39492095	39492096	NDUFS5	4725	127	CGI	FALSE	TRUE	FALSE
cg11403890	chr1	41708077	41708078	SCMH1	22955	-261	CGI	TRUE	FALSE	FALSE
cg11404133	chr1	93544570	93544571	MTF2	22823	-220	CGI	TRUE	FALSE	FALSE
cg11408656	chr1	226497275	226497276	LIN9	286826	279	CGI	TRUE	TRUE	FALSE
cg11409796	chr1	173446294	173446295	LOC100506023	100506023	0	CGI	TRUE	FALSE	FALSE
cg11418036	chr1	202113262	202113263	ARL8A	127829	602	CGI	FALSE	TRUE	FALSE
cg11423323	chr1	181287803	181287804	CACNA1E	777	-164881	CGI	FALSE	FALSE	TRUE
cg11424962	chr1	42383900	42383901	HIVEP3	59269	117694	CGI	FALSE	TRUE	FALSE
cg11485704	chr1	226310475	226310476	H3F3AP4	440926	58796	CGI-S-Shore	FALSE	FALSE	TRUE
cg11503720	chr1	166944856	166944857	MAEL	84944	36	CGI	TRUE	FALSE	FALSE
cg11518657	chr1	67396239	67396240	MIER1	57708	5660	CGI	FALSE	TRUE	FALSE
cg11520162	chr1	2517947	2517948	FAM213B	127281	47	CGI	TRUE	FALSE	FALSE
cg11523538	chr1	244013970	244013971	AKT3	10000	-7083	CGI	FALSE	FALSE	TRUE
cg11523685	chr1	41157828	41157829	LOC100130557	100130557	103	CGI	TRUE	TRUE	FALSE
cg11528033	chr1	1890152	1890153	TMEM52	339456	-39411	CGI-S-Shore	FALSE	TRUE	FALSE
cg11528995	chr1	117210575	117210576	IGSF3	3321	-260	CGI	TRUE	FALSE	FALSE
cg11539038	chr1	11160073	11160074	EXOSC10	5394	-134	CGI	TRUE	FALSE	FALSE
cg11582116	chr1	36348991	36348992	2001-08-01	26523	13581	CGI	TRUE	TRUE	FALSE
cg11587315	chr1	223254976	223254977	TLR5	7100	61646	CGI	FALSE	FALSE	TRUE
cg11658588	chr1	78445757	78445758	DNAJB4	11080	822	CGI-S-Shore	TRUE	TRUE	FALSE
cg11663975	chr1	202936448	202936449	CYB5R1	51706	-43	CGI	TRUE	FALSE	FALSE
cg11669397	chr1	6295430	6295431	ICMT	23463	612	CGI-N-Shore	FALSE	TRUE	FALSE
cg11672054	chr1	228645482	228645483	HIST3H2A	92815	76	CGI	TRUE	FALSE	FALSE
cg11674844	chr1	27216367	27216368	GPN2	54707	500	CGI	TRUE	TRUE	FALSE
cg11674865	chr1	161591488	161591489	FCGR3B	2215	10263	CGI	TRUE	FALSE	FALSE
cg11675722	chr1	61542677	61542678	NFIA	4774	-267	CGI	TRUE	FALSE	FALSE
cg11677857	chr1	2560350	2560351	MMEL1	79258	4129	CGI	FALSE	TRUE	FALSE
cg11679177	chr1	241519652	241519653	RGS7	6000	824	CGI-N-Shore	TRUE	TRUE	FALSE
cg11684496	chr1	23504444	23504445	LUZP1	7798	-142	CGI	TRUE	FALSE	FALSE
cg11688696	chr1	155052192	155052193	LOC100505666	100505666	-15724	CGI	FALSE	TRUE	FALSE
cg11688768	chr1	111888734	111888735	PIFO	128344	-459	CGI	TRUE	FALSE	FALSE
cg11689813	chr1	229570052	229570053	ACTA1	58	-208	CGI	TRUE	FALSE	FALSE
cg11693425	chr1	36615253	36615254	TRAPPC3	27095	-185	CGI	TRUE	FALSE	FALSE
cg11696475	chr1	235813272	235813273	GNG4	2786	780	CGI	TRUE	TRUE	FALSE
cg11702274	chr1	54060214	54060215	DMRTB1	63948	135141	CGI	FALSE	TRUE	FALSE
cg11706775	chr1	52608467	52608468	ZFYVE9	9372	420	CGI	FALSE	TRUE	FALSE
cg11715981	chr1	229761582	229761583	TAF5L	27097	210	CGI	TRUE	TRUE	FALSE
cg11726631	chr1	955757	955758	AGRN	375790	253	CGI	FALSE	TRUE	FALSE
cg11726827	chr1	28879482	28879483	TRNAU1AP	54952	-45	CGI	TRUE	FALSE	FALSE
cg11727653	chr1	16339496	16339497	CLCNKA	1187	-5872	CGI	FALSE	FALSE	TRUE
cg11729413	chr1	3568692	3568693	TP73	7161	-435	CGI	TRUE	FALSE	FALSE
cg11733071	chr1	886543	886544	NOC2L	26155	8134	CGI	FALSE	TRUE	FALSE
cg11737843	chr1	17765054	17765055	RCC2	55920	1194	CGI	TRUE	TRUE	FALSE
cg11747516	chr1	2518503	2518504	FAM213B	127281	603	CGI	TRUE	TRUE	FALSE
cg11750116	chr1	155057442	155057443	LOC100505666	100505666	-20974	CGI	FALSE	TRUE	FALSE
cg11756095	chr1	32410614	32410615	PTP4A2	8073	-6625	CGI	FALSE	FALSE	TRUE
cg11758069	chr1	171750281	171750282	METTL13	51603	-478	CGI-N-Shore	TRUE	FALSE	FALSE
cg11786013	chr1	36622167	36622168	MAP7D1	55700	363	CGI	FALSE	TRUE	FALSE
cg11789864	chr1	229694784	229694785	ABCB10	23456	-341	CGI	TRUE	FALSE	FALSE
cg11798959	chr1	23857321	23857322	E2F2	1870	389	CGI	TRUE	FALSE	FALSE
cg11800675	chr1	3448148	3448149	MIR551A	693135	29204	CGI	TRUE	TRUE	FALSE
cg11803838	chr1	173446516	173446517	PRDX6	9588	29	CGI	TRUE	FALSE	FALSE
cg11813246	chr1	42846740	42846741	RIMKLA	284716	271	CGI	TRUE	FALSE	FALSE
cg11823463	chr1	156629982	156629983	NES	10763	17205	CGI	FALSE	FALSE	TRUE
cg11823511	chr1	91183697	91183698	BARHL2	343472	-902	CGI	TRUE	FALSE	FALSE
cg11828509	chr1	26146223	26146224	MTFR1L	56181	-172	CGI	TRUE	FALSE	FALSE
cg11831004	chr1	52834260	52834261	CC2D1B	200014	-2382	CGI	FALSE	FALSE	TRUE
cg11831711	chr1	91966971	91966972	CDC7	8317	566	CGI	FALSE	TRUE	FALSE
cg11832534	chr1	3563998	3563999	WRAP73	49856	2671	CGI-S-Shore	FALSE	TRUE	FALSE
cg11833275	chr1	32479650	32479651	KHDRBS1	10657	158	CGI	TRUE	FALSE	FALSE
cg11837377	chr1	230778283	230778284	COG2	22796	80	CGI	TRUE	FALSE	FALSE
cg11837766	chr1	64239631	64239632	ROR1	4919	-57	CGI	TRUE	FALSE	FALSE
cg11843502	chr1	7843515	7843516	PER3	8863	-863	CGI	TRUE	FALSE	FALSE
cg11844079	chr1	160001979	160001980	PIGM	93183	-195	CGI	TRUE	FALSE	FALSE
cg11851207	chr1	176176462	176176463	RFWD2	64326	-91	CGI	TRUE	FALSE	FALSE
cg11854871	chr1	110881943	110881944	RBM15	64783	0	CGI	TRUE	FALSE	FALSE
cg11856688	chr1	200708343	200708344	CAMSAP2	23271	-341	CGI	TRUE	FALSE	FALSE
cg11856822	chr1	247274777	247274778	C1orf229	388759	940	CGI	TRUE	FALSE	FALSE
cg11904887	chr1	20834802	20834803	MUL1	79594	-127	CGI	TRUE	FALSE	FALSE
cg11911250	chr1	155247191	155247192	HCN3	57657	-181	CGI	TRUE	TRUE	FALSE
cg11911399	chr1	108742837	108742838	SLC25A24	29957	135	CGI	TRUE	FALSE	FALSE
cg11912330	chr1	161228674	161228675	PCP4L1	654790	156	CGI	TRUE	FALSE	FALSE
cg11913218	chr1	10754156	10754157	CASZ1	54897	102549	CGI	FALSE	TRUE	FALSE
cg11947782	chr1	9775985	9775986	C1orf200	644997	-61340	CGI	TRUE	TRUE	FALSE
cg11949207	chr1	156698126	156698127	ISG20L2	81875	83	CGI	TRUE	TRUE	FALSE
cg11949866	chr1	10754891	10754892	CASZ1	54897	101814	CGI	TRUE	TRUE	FALSE
cg11950805	chr1	43824379	43824380	CDC20	991	-245	CGI	TRUE	FALSE	FALSE
cg11953272	chr1	53067965	53067966	GPX7	2882	-76	CGI	TRUE	FALSE	FALSE
cg11960115	chr1	41268130	41268131	KCNQ4	9132	18445	CGI	FALSE	TRUE	FALSE
cg11966583	chr1	166845478	166845479	TADA1	117143	174	CGI	TRUE	FALSE	FALSE
cg11967292	chr1	225997655	225997656	EPHX1	2052	-140	CGI	TRUE	FALSE	FALSE
cg11971027	chr1	153651147	153651148	NPR1	4881	-15	CGI	TRUE	FALSE	FALSE
cg11976407	chr1	33814857	33814858	MIR3605	100500853	-16763	CGI	FALSE	TRUE	FALSE
cg11980800	chr1	9748107	9748108	C1orf200	644997	-33462	CGI	TRUE	TRUE	FALSE
cg12035827	chr1	10855226	10855227	CASZ1	54897	1479	CGI	FALSE	TRUE	FALSE
cg12042448	chr1	177151076	177151077	FAM5B	57795	10442	CGI	FALSE	TRUE	FALSE
cg12048310	chr1	229762093	229762094	URB2	9816	111	CGI	TRUE	FALSE	FALSE
cg12054521	chr1	245318229	245318230	KIF26B	55083	-56	CGI	TRUE	FALSE	FALSE
cg12055914	chr1	28696088	28696089	PHACTR4	65979	-3	CGI-N-Shore	TRUE	FALSE	FALSE
cg12059112	chr1	181287684	181287685	CACNA1E	777	-165000	CGI	FALSE	FALSE	TRUE
cg12061711	chr1	229644143	229644144	NUP133	55746	-54	CGI	TRUE	FALSE	FALSE
cg12065228	chr1	19652788	19652789	PQLC2	54896	14047	Non-CGI	FALSE	TRUE	FALSE
cg12070152	chr1	40421272	40421273	MFSD2A	84879	487	CGI	TRUE	TRUE	FALSE
cg12070509	chr1	222638775	222638776	HHIPL2	79802	82667	CGI	FALSE	FALSE	TRUE
cg12073495	chr1	27929821	27929822	AHDC1	27245	538	CGI	FALSE	TRUE	FALSE
cg12073565	chr1	235530973	235530974	TBCE	6905	244	CGI	FALSE	TRUE	FALSE
cg12074084	chr1	45140087	45140088	TMEM53	79639	10	CGI	TRUE	FALSE	FALSE
cg12078486	chr1	155108334	155108335	SLC50A1	55974	45	CGI	TRUE	FALSE	FALSE
cg12100411	chr1	2518194	2518195	FAM213B	127281	294	CGI	TRUE	TRUE	FALSE
cg12132894	chr1	9189111	9189112	GPR157	80045	116	CGI	TRUE	FALSE	FALSE
cg12133393	chr1	3816695	3816696	C1orf174	339448	160	CGI	TRUE	TRUE	FALSE
cg12134716	chr1	113250120	113250121	RHOC	389	-94	CGI	TRUE	FALSE	FALSE
cg12140468	chr1	234509341	234509342	COA6	388753	126	CGI	TRUE	FALSE	FALSE
cg12141340	chr1	19890415	19890416	C1orf151-NBL1	100532736	-33054	Non-CGI	FALSE	FALSE	TRUE
cg12167830	chr1	57111108	57111109	PRKAA2	5563	117	CGI	TRUE	FALSE	FALSE
cg12213201	chr1	151431931	151431932	POGZ	23126	8	CGI	TRUE	FALSE	FALSE
cg12219387	chr1	1154157	1154158	TNFRSF4	7293	-4608	CGI	TRUE	TRUE	FALSE
cg12220178	chr1	156721612	156721613	MRPL24	79590	-10688	CGI	TRUE	TRUE	FALSE
cg12222095	chr1	12040222	12040223	MFN2	9927	-14	CGI	TRUE	FALSE	FALSE
cg12222459	chr1	29557230	29557231	MECR	51102	222	CGI	FALSE	TRUE	FALSE
cg12267222	chr1	203296843	203296844	BTG2	7832	22178	CGI	FALSE	FALSE	TRUE
cg12271199	chr1	59248280	59248281	JUN	3725	1503	CGI	TRUE	FALSE	FALSE
cg12275652	chr1	24127148	24127149	GALE	2582	144	CGI	TRUE	TRUE	FALSE
cg12298905	chr1	214162308	214162309	PROX1	5629	1021	CGI	FALSE	TRUE	FALSE
cg12387700	chr1	85514134	85514135	MCOLN3	55283	87	CGI	TRUE	FALSE	FALSE
cg12409601	chr1	45265955	45265956	PLK3	1263	-79	CGI	TRUE	FALSE	FALSE
cg12418357	chr1	31770205	31770206	ZCCHC17	51538	362	CGI	TRUE	TRUE	FALSE
cg12419491	chr1	29063485	29063486	YTHDF2	51441	351	CGI	TRUE	TRUE	FALSE
cg12427029	chr1	226496828	226496829	LIN9	286826	726	CGI	TRUE	TRUE	FALSE
cg12432552	chr1	109618601	109618602	TAF13	6884	21	CGI	TRUE	FALSE	FALSE
cg12433217	chr1	25758112	25758113	TMEM57	55219	723	CGI-S-Shore	TRUE	TRUE	FALSE
cg12444684	chr1	65431340	65431341	JAK1	3716	1277	CGI	FALSE	TRUE	FALSE
cg12450040	chr1	154975359	154975360	ZBTB7B	51043	252	CGI	TRUE	TRUE	FALSE
cg12450347	chr1	231175978	231175979	FAM89A	375061	15	CGI	TRUE	FALSE	FALSE
cg12458866	chr1	9353610	9353611	SPSB1	80176	668	CGI	FALSE	TRUE	FALSE
cg12461345	chr1	218519565	218519566	TGFB2	7042	888	CGI	TRUE	FALSE	FALSE
cg12467595	chr1	19920571	19920572	C1orf151-NBL1	100532736	-2898	CGI-N-Shelf	FALSE	FALSE	TRUE
cg12470011	chr1	205473662	205473663	CDK18	5129	-20	CGI-N-Shore	TRUE	FALSE	FALSE
cg12479630	chr1	28157569	28157570	PPP1R8	5511	316	CGI	TRUE	TRUE	FALSE
cg12480034	chr1	57890488	57890489	C8B	732	-458799	CGI	TRUE	TRUE	FALSE
cg12525514	chr1	1343260	1343261	MRPL20	55052	-566	CGI-S-Shore	TRUE	FALSE	FALSE
cg12525736	chr1	228269915	228269916	ARF1	375	-444	CGI	TRUE	FALSE	FALSE
cg12527909	chr1	109241986	109241987	PRPF38B	55119	7053	CGI	FALSE	TRUE	FALSE
cg12528403	chr1	40997196	40997197	ZNF684	127396	-35	CGI	TRUE	FALSE	FALSE
cg12549268	chr1	55008028	55008029	ACOT11	26027	97	CGI	TRUE	FALSE	FALSE
cg12550412	chr1	227730308	227730309	ZNF678	339500	-20910	CGI	FALSE	FALSE	TRUE
cg12576688	chr1	2344112	2344113	PEX10	5192	-101	CGI	TRUE	FALSE	FALSE
cg12578844	chr1	23346212	23346213	KDM1A	23028	270	CGI	TRUE	FALSE	FALSE
cg12593394	chr1	19923846	19923847	C1orf151-NBL1	100532736	374	CGI	FALSE	TRUE	FALSE
cg12595647	chr1	54411915	54411916	LRRC42	115353	-120	CGI	TRUE	FALSE	FALSE
cg12597281	chr1	208266216	208266217	PLXNA2	5362	151447	Non-CGI	FALSE	TRUE	FALSE
cg12602703	chr1	22109860	22109861	USP48	84196	-171	CGI	TRUE	FALSE	FALSE
cg12605679	chr1	36615054	36615055	TRAPPC3	27095	11	CGI	TRUE	FALSE	FALSE
cg12606857	chr1	118471938	118471939	GDAP2	54834	362	CGI	TRUE	TRUE	FALSE
cg12610519	chr1	16494002	16494003	EPHA2	1969	-11419	CGI-N-Shore	FALSE	FALSE	TRUE
cg12612238	chr1	15850501	15850502	CASP9	842	782	CGI	FALSE	TRUE	FALSE
cg12614442	chr1	147142665	147142666	ACP6	51205	-30	CGI	TRUE	FALSE	FALSE
cg12618546	chr1	32817463	32817464	FAM229A	100128071	10379	CGI	FALSE	FALSE	TRUE
cg12630409	chr1	36916195	36916196	OSCP1	127700	-108	CGI	TRUE	FALSE	FALSE
cg12630974	chr1	28655517	28655518	MED18	54797	3	CGI	TRUE	FALSE	FALSE
cg12634306	chr1	40098811	40098812	HEYL	26508	6535	CGI	TRUE	TRUE	FALSE
cg12643226	chr1	115829262	115829263	NGF	4803	51593	CGI	TRUE	TRUE	FALSE
cg12647165	chr1	994637	994638	RNF223	401934	15048	CGI	TRUE	FALSE	FALSE
cg12648677	chr1	1447365	1447366	ATAD3A	55210	-156	CGI	TRUE	FALSE	FALSE
cg12651044	chr1	150241550	150241551	APH1A	51107	57	CGI	TRUE	FALSE	FALSE
cg12655452	chr1	77685094	77685095	PIGK	10026	36	CGI	TRUE	FALSE	FALSE
cg12656020	chr1	91185028	91185029	BARHL2	343472	-2233	CGI	FALSE	FALSE	TRUE
cg12678006	chr1	155164622	155164623	MIR92B	693235	-344	CGI	TRUE	FALSE	FALSE
cg12687922	chr1	113257872	113257873	PPM1J	333926	76	CGI	TRUE	FALSE	FALSE
cg12690148	chr1	63788429	63788430	FOXD3	27022	-299	CGI	TRUE	FALSE	FALSE
cg12699174	chr1	156024477	156024478	LAMTOR2	28956	-38	CGI	TRUE	FALSE	FALSE
cg12714180	chr1	38512250	38512251	POU3F1	5453	198	CGI	TRUE	FALSE	FALSE
cg12720839	chr1	55008150	55008151	ACOT11	26027	219	CGI	FALSE	TRUE	FALSE
cg12726300	chr1	109584677	109584678	WDR47	22911	171	CGI	TRUE	FALSE	FALSE
cg12726784	chr1	155225142	155225143	FAM189B	10712	130	CGI	TRUE	FALSE	FALSE
cg12730826	chr1	205179972	205179973	DSTYK	25778	753	CGI-N-Shore	FALSE	TRUE	FALSE
cg12733759	chr1	2518117	2518118	FAM213B	127281	217	CGI	TRUE	TRUE	FALSE
cg12735263	chr1	39874887	39874888	KIAA0754	643314	-287	CGI	TRUE	TRUE	FALSE
cg12741345	chr1	155052737	155052738	LOC100505666	100505666	-16269	CGI	FALSE	TRUE	FALSE
cg12748890	chr1	27676205	27676206	SYTL1	84958	7721	CGI	FALSE	TRUE	FALSE
cg12753895	chr1	46216422	46216423	IPP	3652	61	CGI	TRUE	FALSE	FALSE
cg12754671	chr1	161171876	161171877	NDUFS2	4720	2770	CGI	TRUE	TRUE	FALSE
cg12761704	chr1	236767610	236767611	HEATR1	55127	229	CGI	FALSE	TRUE	FALSE
cg12768767	chr1	47779966	47779967	STIL	6491	-146	CGI	TRUE	FALSE	FALSE
cg12789062	chr1	38512663	38512664	POU3F1	5453	-212	CGI	TRUE	FALSE	FALSE
cg12793305	chr1	39325375	39325376	MYCBP	26292	13673	CGI	TRUE	TRUE	FALSE
cg12798035	chr1	150981329	150981330	PRUNE	58497	355	CGI	TRUE	TRUE	FALSE
cg12898849	chr1	178511736	178511737	C1orf220	400798	-193	CGI	TRUE	TRUE	FALSE
cg12900942	chr1	36689399	36689400	THRAP3	9967	-616	CGI	TRUE	FALSE	FALSE
cg12905085	chr1	32054510	32054511	TINAGL1	64129	12423	CGI	FALSE	FALSE	TRUE
cg12911256	chr1	6265879	6265880	RNF207	388591	-308	CGI	TRUE	FALSE	FALSE
cg13051071	chr1	145473392	145473393	ANKRD34A	284615	2883	CGI	TRUE	TRUE	FALSE
cg13057174	chr1	10857091	10857092	CASZ1	54897	-383	CGI-S-Shore	TRUE	FALSE	FALSE
cg13059411	chr1	112533221	112533222	KCND3	3752	-1443	CGI	TRUE	FALSE	FALSE
cg13061350	chr1	225840520	225840521	ENAH	55740	323	CGI	TRUE	FALSE	FALSE
cg13063202	chr1	90228758	90228759	LRRC8D	55144	-57813	CGI	FALSE	FALSE	TRUE
cg13064914	chr1	26799365	26799366	HMGN2	3151	462	CGI	FALSE	TRUE	FALSE
cg13077324	chr1	43124003	43124004	PPIH	10465	-43	CGI	TRUE	FALSE	FALSE
cg13080626	chr1	110753717	110753718	KCNC4	3749	380	CGI	TRUE	FALSE	FALSE
cg13085338	chr1	214776475	214776476	CENPF	1063	-55	CGI	TRUE	FALSE	FALSE
cg13093249	chr1	59281922	59281923	LOC100131060	100131060	31098	CGI	FALSE	TRUE	FALSE
cg13107428	chr1	197744541	197744542	DENND1B	163486	80	CGI	TRUE	FALSE	FALSE
cg13110034	chr1	145470261	145470262	POLR3GL	84265	124	CGI	TRUE	TRUE	FALSE
cg13114166	chr1	28241026	28241027	RPA2	6118	208	CGI	TRUE	FALSE	FALSE
cg13116840	chr1	234509193	234509194	COA6	388753	-19	CGI	TRUE	FALSE	FALSE
cg13134514	chr1	202780014	202780015	KDM5B	10765	-2464	CGI	FALSE	FALSE	TRUE
cg13148469	chr1	28969864	28969865	TAF12	6883	-259	CGI	TRUE	FALSE	FALSE
cg13150040	chr1	204381152	204381153	PPP1R15B	84919	-207	CGI	TRUE	FALSE	FALSE
cg13150171	chr1	41326892	41326893	CITED4	163732	1124	CGI-N-Shore	TRUE	FALSE	FALSE
cg13168437	chr1	93250863	93250864	EVI5	7813	7096	CGI	FALSE	TRUE	FALSE
cg13173898	chr1	41469587	41469588	SLFNL1-AS1	100507178	-10673	Non-CGI	FALSE	TRUE	FALSE
cg13179130	chr1	24070416	24070417	TCEB3	6924	559	CGI	FALSE	TRUE	FALSE
cg13180005	chr1	182360683	182360684	GLUL	2752	656	CGI	TRUE	TRUE	FALSE
cg13180787	chr1	24127146	24127147	GALE	2582	146	CGI	TRUE	TRUE	FALSE
cg13181052	chr1	40420675	40420676	MFSD2A	84879	-107	CGI	TRUE	FALSE	FALSE
cg13183282	chr1	155948244	155948245	ARHGEF2	9181	11618	CGI	TRUE	TRUE	FALSE
cg13183628	chr1	1259698	1259699	CPSF3L	54973	346	CGI	TRUE	TRUE	FALSE
cg13184734	chr1	178512007	178512008	C1orf220	400798	75	CGI	TRUE	TRUE	FALSE
cg13187885	chr1	246930969	246930970	LOC149134	149134	-8344	Non-CGI	FALSE	TRUE	FALSE
cg13195218	chr1	223900468	223900469	CAPN2	824	11172	CGI	TRUE	TRUE	FALSE
cg13199615	chr1	155146785	155146786	KRTCAP2	200185	-980	CGI	TRUE	TRUE	FALSE
cg13206411	chr1	197170200	197170201	CRB1	23418	-390	CGI	TRUE	FALSE	FALSE
cg13207501	chr1	38470665	38470666	FHL3	2275	520	CGI	FALSE	TRUE	FALSE
cg13210260	chr1	50889294	50889295	DMRTA2	63950	-174	CGI	TRUE	FALSE	FALSE
cg13213419	chr1	38156211	38156212	C1orf109	54955	1675	CGI	TRUE	TRUE	FALSE
cg13218803	chr1	32110519	32110520	PEF1	553115	317	CGI	TRUE	FALSE	FALSE
cg13223182	chr1	227015944	227015945	PSEN2	5664	-42327	CGI	FALSE	FALSE	TRUE
cg13229655	chr1	10532570	10532571	DFFA	1676	41	CGI	TRUE	FALSE	FALSE
cg13232021	chr1	32574089	32574090	KPNA6	23633	444	CGI	TRUE	TRUE	FALSE
cg13232357	chr1	151042823	151042824	GABPB2	126626	-255	CGI-N-Shore	TRUE	FALSE	FALSE
cg13233534	chr1	162531423	162531424	UAP1	6675	126	CGI	TRUE	FALSE	FALSE
cg13243329	chr1	212782207	212782208	FAM71A	149647	-15580	CGI	TRUE	TRUE	FALSE
cg13298734	chr1	236030503	236030504	MIR1537	100302139	-14142	CGI	TRUE	TRUE	FALSE
cg13298932	chr1	155100169	155100170	EFNA1	1942	-178	CGI	TRUE	FALSE	FALSE
cg13303553	chr1	33938226	33938227	ZSCAN20	7579	-4	CGI	TRUE	FALSE	FALSE
cg13305883	chr1	145438423	145438424	TXNIP	10628	-37	CGI	TRUE	FALSE	FALSE
cg13323097	chr1	205649211	205649212	ELK4	2005	417	CGI	FALSE	TRUE	FALSE
cg13356884	chr1	110881579	110881580	LOC440600	440600	212	CGI	TRUE	TRUE	FALSE
cg13362782	chr1	27332751	27332752	FAM46B	115572	6580	CGI	FALSE	TRUE	FALSE
cg13366587	chr1	117664538	117664539	TRIM45	80263	-126	CGI	TRUE	FALSE	FALSE
cg13367647	chr1	155213714	155213715	GBA	2629	937	CGI-N-Shore	FALSE	TRUE	FALSE
cg13371836	chr1	840274	840275	LOC100130417	100130417	14541	CGI	FALSE	FALSE	TRUE
cg13372766	chr1	228464049	228464050	OBSCN	84033	68187	CGI	TRUE	TRUE	FALSE
cg13379827	chr1	65468782	65468783	JAK1	3716	-36162	CGI	TRUE	FALSE	FALSE
cg13382707	chr1	161015776	161015777	USF1	7391	-18	CGI	TRUE	FALSE	FALSE
cg13386712	chr1	150849166	150849167	ARNT	405	76	CGI	TRUE	FALSE	FALSE
cg13392150	chr1	27648632	27648633	TMEM222	84065	-2	CGI	TRUE	FALSE	FALSE
cg13402217	chr1	151584375	151584376	SNX27	81609	-285	CGI-N-Shore	TRUE	FALSE	FALSE
cg13424097	chr1	1510427	1510428	SSU72	29101	-164	CGI	TRUE	FALSE	FALSE
cg13437164	chr1	22890048	22890049	EPHA8	2046	43	CGI	TRUE	FALSE	FALSE
cg13440781	chr1	168148262	168148263	TIPRL	261726	90	CGI	TRUE	FALSE	FALSE
cg13444964	chr1	236687053	236687054	LGALS8-AS1	100287902	753	CGI	TRUE	TRUE	FALSE
cg13450310	chr1	39874390	39874391	KIAA0754	643314	-784	CGI	TRUE	TRUE	FALSE
cg13452258	chr1	38218533	38218534	EPHA10	284656	12289	CGI	FALSE	TRUE	FALSE
cg13461447	chr1	1714001	1714002	NADK	65220	-2492	CGI	FALSE	FALSE	TRUE
cg13468764	chr1	936897	936898	HES4	57801	-1344	CGI	TRUE	FALSE	FALSE
cg13484546	chr1	16084939	16084940	FBLIM1	54751	1784	CGI	TRUE	TRUE	FALSE
cg13485746	chr1	162467911	162467912	UHMK1	127933	946	CGI	TRUE	TRUE	FALSE
cg13487185	chr1	29213677	29213678	EPB41	2035	73	CGI	TRUE	FALSE	FALSE
cg13488570	chr1	2222253	2222254	LOC100129534	100129534	61845	CGI-N-Shore	FALSE	TRUE	FALSE
cg13490827	chr1	46269305	46269306	MAST2	23139	19	CGI	TRUE	FALSE	FALSE
cg13491192	chr1	16679149	16679150	FBXO42	54455	-200	CGI	TRUE	FALSE	FALSE
cg13496323	chr1	185703548	185703549	HMCN1	83872	-133	CGI	TRUE	FALSE	FALSE
cg13498872	chr1	65720083	65720084	DNAJC6	9829	-63	CGI	TRUE	FALSE	FALSE
cg13499468	chr1	23494459	23494460	LUZP1	7798	9840	CGI	FALSE	TRUE	FALSE
cg13500195	chr1	226891357	226891358	ITPKB	3707	35517	CGI	FALSE	TRUE	FALSE
cg13501090	chr1	115212659	115212660	DENND2C	163259	383	CGI	TRUE	TRUE	FALSE
cg13501359	chr1	197881540	197881541	LHX9	56956	-93	CGI	TRUE	FALSE	FALSE
cg13546102	chr1	29241356	29241357	EPB41	2035	27752	CGI	FALSE	TRUE	FALSE
cg13547268	chr1	111746963	111746964	DENND2D	79961	66	CGI	TRUE	FALSE	FALSE
cg13548601	chr1	29450729	29450730	TMEM200B	399474	-307	CGI	TRUE	FALSE	FALSE
cg13550542	chr1	155904276	155904277	KIAA0907	22889	-87	CGI	TRUE	FALSE	FALSE
cg13554489	chr1	21835685	21835686	ALPL	249	-171	CGI	TRUE	FALSE	FALSE
cg13557139	chr1	156630023	156630024	NES	10763	17164	CGI	FALSE	FALSE	TRUE
cg13560259	chr1	112938982	112938983	CTTNBP2NL	55917	181	CGI	TRUE	TRUE	FALSE
cg13560871	chr1	220863766	220863767	C1orf115	79762	137	CGI	TRUE	FALSE	FALSE
cg13562446	chr1	51702078	51702079	RNF11	26994	132	CGI	TRUE	FALSE	FALSE
cg13567386	chr1	93913447	93913448	FNBP1L	54874	-239	CGI	TRUE	FALSE	FALSE
cg13568283	chr1	38099343	38099344	RSPO1	284654	1250	CGI	FALSE	TRUE	FALSE
cg13570831	chr1	239550303	239550304	CHRM3	1131	437	CGI	TRUE	FALSE	FALSE
cg13572289	chr1	114447746	114447747	AP4B1	10717	-4	CGI	TRUE	FALSE	FALSE
cg13576006	chr1	154193656	154193657	C1orf43	25912	-382	CGI	TRUE	TRUE	FALSE
cg13580321	chr1	93645478	93645479	TMED5	50999	766	CGI	TRUE	TRUE	FALSE
cg13625205	chr1	151584902	151584903	SNX27	81609	239	CGI	TRUE	FALSE	FALSE
cg13675469	chr1	174992539	174992540	MRPS14	63931	50	CGI	TRUE	FALSE	FALSE
cg13675568	chr1	44872075	44872076	RNF220	55182	1114	CGI	FALSE	TRUE	FALSE
cg13676787	chr1	179051132	179051133	TOR3A	64222	19	CGI	TRUE	FALSE	FALSE
cg13678973	chr1	50513870	50513871	ELAVL4	1996	183	CGI	FALSE	TRUE	FALSE
cg13679776	chr1	64936373	64936374	CACHD1	57685	-101	CGI	TRUE	FALSE	FALSE
cg13685951	chr1	177140322	177140323	FAM5B	57795	-309	CGI	TRUE	FALSE	FALSE
cg13687313	chr1	161136664	161136665	PPOX	5498	482	CGI	TRUE	TRUE	FALSE
cg13689737	chr1	42383644	42383645	HIVEP3	59269	117950	CGI-N-Shore	FALSE	TRUE	FALSE
cg13690588	chr1	28415118	28415119	EYA3	2140	28	CGI	TRUE	FALSE	FALSE
cg13690962	chr1	172502161	172502162	SUCO	51430	-97	CGI	TRUE	FALSE	FALSE
cg13693260	chr1	98386697	98386698	DPYD	1806	-81	CGI	TRUE	FALSE	FALSE
cg13724813	chr1	9353314	9353315	SPSB1	80176	372	CGI	FALSE	TRUE	FALSE
cg13764106	chr1	53527693	53527694	PODN	127435	-29	CGI	TRUE	FALSE	FALSE
cg13779567	chr1	233431268	233431269	PCNXL2	80003	189	CGI	TRUE	FALSE	FALSE
cg13786801	chr1	59042745	59042746	TACSTD2	4070	419	CGI	TRUE	FALSE	FALSE
cg13787193	chr1	202830826	202830827	LOC148709	148709	-54	CGI	TRUE	FALSE	FALSE
cg13788537	chr1	185703485	185703486	HMCN1	83872	-196	CGI	TRUE	FALSE	FALSE
cg13788820	chr1	26437324	26437325	PDIK1L	149420	-330	CGI	TRUE	FALSE	FALSE
cg13793178	chr1	26232731	26232732	MIR3917	100500808	212	CGI	TRUE	TRUE	FALSE
cg13795627	chr1	157015873	157015874	ARHGEF11	9826	-710	CGI	TRUE	FALSE	FALSE
cg13797285	chr1	115631930	115631931	TSPAN2	10100	189	CGI	FALSE	TRUE	FALSE
cg13802035	chr1	896316	896317	KLHL17	339451	348	CGI	TRUE	TRUE	FALSE
cg13804058	chr1	115880935	115880936	NGF	4803	-77	CGI	TRUE	FALSE	FALSE
cg13840194	chr1	10856202	10856203	CASZ1	54897	503	CGI	FALSE	TRUE	FALSE
cg13841804	chr1	150207467	150207468	ANP32E	81611	1035	CGI	TRUE	TRUE	FALSE
cg13844591	chr1	158150675	158150676	CD1D	912	937	CGI	TRUE	TRUE	FALSE
cg13847963	chr1	24514220	24514221	IFNLR1	163702	-454	CGI	TRUE	FALSE	FALSE
cg13848568	chr1	45965625	45965626	CCDC163P	126661	124	CGI	TRUE	FALSE	FALSE
cg13849378	chr1	241520331	241520332	RGS7	6000	145	CGI	TRUE	FALSE	FALSE
cg13850606	chr1	229543554	229543555	ACTA1	58	26287	CGI	FALSE	FALSE	TRUE
cg13852303	chr1	37980776	37980777	MEAF6	64769	-411	CGI	TRUE	FALSE	FALSE
cg13854500	chr1	31297305	31297306	LAPTM5	7805	-66621	CGI	FALSE	FALSE	TRUE
cg13855472	chr1	222886563	222886564	AIDA	64853	-36	CGI	TRUE	TRUE	FALSE
cg13860548	chr1	15853252	15853253	DNAJC16	23341	-98	CGI	TRUE	FALSE	FALSE
cg13862210	chr1	11796076	11796077	AGTRAP	57085	-64	CGI	TRUE	FALSE	FALSE
cg13870776	chr1	33352269	33352270	HPCA	3208	170	CGI	FALSE	TRUE	FALSE
cg13881199	chr1	231298177	231298178	TRIM67	440730	-495	CGI	TRUE	FALSE	FALSE
cg13892954	chr1	57110867	57110868	PRKAA2	5563	-121	CGI	TRUE	FALSE	FALSE
cg13896157	chr1	27286832	27286833	C1orf172	126695	67	CGI	FALSE	TRUE	FALSE
cg13897296	chr1	200379235	200379236	ZNF281	23528	-68	CGI	TRUE	FALSE	FALSE
cg13900113	chr1	41131309	41131310	RIMS3	9783	13	CGI	TRUE	FALSE	FALSE
cg13900327	chr1	24525989	24525990	LOC284632	284632	-739	Non-CGI	TRUE	FALSE	FALSE
cg13907181	chr1	234736119	234736120	IRF2BP2	359948	9150	CGI-S-Shore	FALSE	FALSE	TRUE
cg13910983	chr1	28241279	28241280	RPA2	6118	-42	CGI	TRUE	FALSE	FALSE
cg13921652	chr1	144931966	144931967	LOC653513	653513	108024	CGI	TRUE	TRUE	FALSE
cg13924868	chr1	213021261	213021262	C1orf227	149643	-269	Non-CGI	TRUE	FALSE	FALSE
cg13936911	chr1	109757083	109757084	SARS	6301	567	CGI	FALSE	TRUE	FALSE
cg13939859	chr1	91183519	91183520	BARHL2	343472	-724	CGI	TRUE	FALSE	FALSE
cg13943249	chr1	154244918	154244919	HAX1	10456	-119	CGI	TRUE	FALSE	FALSE
cg13946767	chr1	153599671	153599672	S100A1	6271	-1200	Non-CGI	TRUE	TRUE	FALSE
cg13947949	chr1	17766238	17766239	RCC2	55920	10	CGI-S-Shore	TRUE	FALSE	FALSE
cg13950210	chr1	45452319	45452320	EIF2B3	8891	40	CGI	TRUE	FALSE	FALSE
cg13950625	chr1	21995880	21995881	RAP1GAP	5909	-23	CGI	TRUE	FALSE	FALSE
cg13950948	chr1	156627399	156627400	BCAN	63827	15658	CGI	FALSE	TRUE	FALSE
cg13976045	chr1	211752571	211752572	SLC30A1	7779	-471	CGI	TRUE	FALSE	FALSE
cg13976253	chr1	202317780	202317781	PPP1R12B	4660	-48	CGI	TRUE	FALSE	FALSE
cg13984512	chr1	145438431	145438432	TXNIP	10628	-29	CGI	TRUE	FALSE	FALSE
cg14014471	chr1	178694459	178694460	RALGPS2	55103	158	CGI	TRUE	FALSE	FALSE
cg14022530	chr1	100598534	100598535	SASS6	163786	-22	CGI	TRUE	FALSE	FALSE
cg14023159	chr1	32646132	32646133	TXLNA	200081	786	CGI	FALSE	TRUE	FALSE
cg14024780	chr1	179262948	179262949	SOAT1	6646	98	CGI	TRUE	FALSE	FALSE
cg14025606	chr1	150487872	150487873	ECM1	1893	7384	CGI	FALSE	FALSE	TRUE
cg14028892	chr1	184943191	184943192	FAM129A	116496	489	CGI	FALSE	TRUE	FALSE
cg14031065	chr1	247241940	247241941	ZNF670-ZNF695	100533111	173	CGI	TRUE	FALSE	FALSE
cg14036923	chr1	40781129	40781130	COL9A2	1298	1929	CGI	FALSE	TRUE	FALSE
cg14039463	chr1	212004169	212004170	LPGAT1	9926	-54	CGI	TRUE	FALSE	FALSE
cg14086045	chr1	157963794	157963795	KIRREL	55243	730	CGI	FALSE	TRUE	FALSE
cg14086160	chr1	159895389	159895390	TAGLN2	8407	-104	CGI	TRUE	FALSE	FALSE
cg14093570	chr1	16679143	16679144	FBXO42	54455	-194	CGI	TRUE	FALSE	FALSE
cg14156405	chr1	241520286	241520287	RGS7	6000	190	CGI	TRUE	FALSE	FALSE
cg14157073	chr1	7765564	7765565	VAMP3	9341	-65763	CGI	FALSE	TRUE	FALSE
cg14160599	chr1	144932227	144932228	LOC653513	653513	107763	CGI	TRUE	TRUE	FALSE
cg14169801	chr1	116916416	116916417	ATP1A1	476	1411	CGI	TRUE	TRUE	FALSE
cg14170663	chr1	21503478	21503479	EIF4G3	8672	-96	CGI	TRUE	FALSE	FALSE
cg14170756	chr1	16563782	16563783	RSG1	79363	-122	CGI	TRUE	FALSE	FALSE
cg14170835	chr1	88418535	88418536	LOC100505768	100505768	-581196	Non-CGI	FALSE	FALSE	TRUE
cg14172633	chr1	185703557	185703558	HMCN1	83872	-124	CGI	TRUE	FALSE	FALSE
cg14179217	chr1	93913835	93913836	FNBP1L	54874	146	CGI	TRUE	FALSE	FALSE
cg14181387	chr1	36022775	36022776	NCDN	23154	-616	CGI	TRUE	TRUE	FALSE
cg14202380	chr1	47070052	47070053	MOB3C	148932	12509	CGI	TRUE	TRUE	FALSE
cg14204586	chr1	155931858	155931859	RXFP4	339403	20377	CGI	FALSE	TRUE	FALSE
cg14211117	chr1	246016737	246016738	SMYD3	64754	653905	Non-CGI	FALSE	TRUE	FALSE
cg14212631	chr1	197115504	197115505	ASPM	259266	318	CGI	TRUE	FALSE	FALSE
cg14212983	chr1	21985742	21985743	RAP1GAP	5909	10112	CGI-N-Shore	FALSE	TRUE	FALSE
cg14218042	chr1	4716578	4716579	AJAP1	55966	1472	CGI	FALSE	TRUE	FALSE
cg14219630	chr1	45987336	45987337	PRDX1	5052	1224	CGI	TRUE	TRUE	FALSE
cg14220628	chr1	167691236	167691237	MPZL1	9019	48	CGI	TRUE	FALSE	FALSE
cg14252954	chr1	114889371	114889372	TRIM33	51592	164408	CGI	FALSE	FALSE	TRUE
cg14279007	chr1	38512588	38512589	POU3F1	5453	-137	CGI	TRUE	FALSE	FALSE
cg14280964	chr1	37940281	37940282	ZC3H12A	80149	161	CGI	TRUE	TRUE	FALSE
cg14286274	chr1	211555998	211555999	LINC00467	84791	-97	CGI	TRUE	FALSE	FALSE
cg14297876	chr1	53704016	53704017	LOC100507564	100507564	-264	CGI	TRUE	TRUE	FALSE
cg14376275	chr1	171810570	171810571	DNM3	26052	-49	CGI	TRUE	FALSE	FALSE
cg14415733	chr1	39957204	39957205	BMP8A	353500	-112	CGI	TRUE	FALSE	FALSE
cg14416302	chr1	150534139	150534140	MIR4257	100422997	9733	CGI	FALSE	FALSE	TRUE
cg14417407	chr1	94313600	94313601	BCAR3	8412	-893	CGI	TRUE	FALSE	FALSE
cg14423177	chr1	92545898	92545899	BTBD8	284697	35	CGI	TRUE	FALSE	FALSE
cg14425609	chr1	65432479	65432480	JAK1	3716	138	CGI	TRUE	TRUE	FALSE
cg14455487	chr1	42800860	42800861	FOXJ3	22887	686	CGI	TRUE	TRUE	FALSE
cg14475772	chr1	150207136	150207137	ANP32E	81611	1366	CGI	TRUE	TRUE	FALSE
cg14508615	chr1	100598505	100598506	SASS6	163786	4	CGI	TRUE	FALSE	FALSE
cg14510299	chr1	27928494	27928495	AHDC1	27245	1865	CGI-N-Shore	FALSE	TRUE	FALSE
cg14513226	chr1	212003502	212003503	LPGAT1	9926	610	CGI	TRUE	TRUE	FALSE
cg14516704	chr1	25559564	25559565	SYF2	25949	-550	CGI-S-Shore	TRUE	FALSE	FALSE
cg14521523	chr1	115212675	115212676	DENND2C	163259	367	CGI	TRUE	TRUE	FALSE
cg14522884	chr1	235490708	235490709	ARID4B	51742	822	CGI	TRUE	TRUE	FALSE
cg14531560	chr1	16085371	16085372	FBLIM1	54751	2216	CGI	FALSE	TRUE	FALSE
cg14550570	chr1	3712988	3712989	LRRC47	57470	78	CGI	TRUE	FALSE	FALSE
cg14559881	chr1	229407077	229407078	RAB4A	5867	197	CGI	TRUE	FALSE	FALSE
cg14565781	chr1	45274513	45274514	BTBD19	149478	358	CGI-S-Shelf	TRUE	FALSE	FALSE
cg14565881	chr1	76190040	76190041	ACADM	34	-1	CGI	TRUE	FALSE	FALSE
cg14611745	chr1	227916287	227916288	LOC100130093	100130093	46	CGI	TRUE	FALSE	FALSE
cg14657417	chr1	2344183	2344184	PEX10	5192	-172	CGI	TRUE	FALSE	FALSE
cg14661383	chr1	228463720	228463721	OBSCN	84033	67858	CGI	TRUE	TRUE	FALSE
cg14661946	chr1	116694919	116694920	MAB21L3	126868	40542	CGI	FALSE	FALSE	TRUE
cg14669379	chr1	112058559	112058560	RAP1A	5906	-26494	CGI	FALSE	TRUE	FALSE
cg14669906	chr1	36396823	36396824	2003-08-01	192669	503	CGI	TRUE	TRUE	FALSE
cg14711183	chr1	100598736	100598737	TRMT13	54482	29	CGI	TRUE	FALSE	FALSE
cg14712186	chr1	91184413	91184414	BARHL2	343472	-1618	CGI	TRUE	FALSE	FALSE
cg14780540	chr1	247242157	247242158	ZNF670-ZNF695	100533111	-41	CGI	TRUE	FALSE	FALSE
cg14787290	chr1	118472449	118472450	WDR3	10885	76	CGI	TRUE	TRUE	FALSE
cg14788660	chr1	155278430	155278431	FDPS	2224	-107	CGI-N-Shore	TRUE	FALSE	FALSE
cg14789568	chr1	29508095	29508096	SRSF4	6429	540	CGI	FALSE	TRUE	FALSE
cg14790208	chr1	145610755	145610756	POLR3C	10623	127	CGI	TRUE	FALSE	FALSE
cg14790772	chr1	193090742	193090743	CDC73	79577	-344	CGI	TRUE	FALSE	FALSE
cg14825828	chr1	220219906	220219907	EPRS	2058	92	CGI	TRUE	TRUE	FALSE
cg14834760	chr1	33429891	33429892	RNF19B	127544	393	CGI	TRUE	FALSE	FALSE
cg14836864	chr1	45965990	45965991	MMACHC	25974	133	CGI	TRUE	FALSE	FALSE
cg14837478	chr1	31769623	31769624	SNRNP40	9410	19	CGI	TRUE	FALSE	FALSE
cg14838433	chr1	55446303	55446304	TMEM61	199964	-160	CGI	TRUE	FALSE	FALSE
cg14843772	chr1	93811463	93811464	DR1	1810	-13	CGI	TRUE	FALSE	FALSE
cg14848383	chr1	6685149	6685150	THAP3	90326	223	CGI	TRUE	TRUE	FALSE
cg14848555	chr1	171750797	171750798	METTL13	51603	35	CGI	TRUE	FALSE	FALSE
cg14852238	chr1	28562670	28562671	ATPIF1	93974	67	CGI	TRUE	FALSE	FALSE
cg14856698	chr1	2135945	2135946	C1orf86	199990	3225	CGI	FALSE	TRUE	FALSE
cg14859204	chr1	99126913	99126914	SNX7	51375	-321	CGI	TRUE	FALSE	FALSE
cg14912727	chr1	36916005	36916006	OSCP1	127700	79	CGI	TRUE	FALSE	FALSE
cg14913181	chr1	6845123	6845124	CAMTA1	23261	-259	CGI	TRUE	FALSE	FALSE
cg14962394	chr1	26249385	26249386	STMN1	3925	-16016	CGI	FALSE	FALSE	TRUE
cg14962774	chr1	118472841	118472842	WDR3	10885	468	CGI	TRUE	TRUE	FALSE
cg14975138	chr1	48463105	48463106	TRABD2B	388630	-542	CGI	TRUE	FALSE	FALSE
cg14976442	chr1	249120571	249120572	MIR3124	100422879	-3	CGI	TRUE	FALSE	FALSE
cg14976971	chr1	229478633	229478634	CCSAP	126731	53	CGI	FALSE	TRUE	FALSE
cg14978304	chr1	162039761	162039762	NOS1AP	9722	179	CGI	TRUE	FALSE	FALSE
cg14981573	chr1	70671146	70671147	LRRC40	55631	213	CGI	TRUE	FALSE	FALSE
cg14985478	chr1	86174138	86174139	ZNHIT6	54680	-21	CGI	TRUE	FALSE	FALSE
cg14985987	chr1	222763457	222763458	TAF1A	9015	-181	CGI	TRUE	FALSE	FALSE
cg14988142	chr1	229643771	229643772	NUP133	55746	315	CGI	FALSE	TRUE	FALSE
cg14993530	chr1	245027115	245027116	HNRNPU	3192	710	CGI	TRUE	FALSE	FALSE
cg15009352	chr1	22263925	22263926	HSPG2	3339	-174	CGI	TRUE	FALSE	FALSE
cg15014010	chr1	33816020	33816021	MIR3605	100500853	-17926	CGI	TRUE	TRUE	FALSE
cg15026696	chr1	15736072	15736073	EFHD2	79180	-317	CGI	TRUE	FALSE	FALSE
cg15030636	chr1	246768697	246768698	CNST	163882	39057	CGI-N-Shore	FALSE	TRUE	FALSE
cg15031661	chr1	240256603	240256604	FMN2	56776	1417	CGI	TRUE	FALSE	FALSE
cg15031826	chr1	208136952	208136953	CD34	947	-52268	CGI	FALSE	FALSE	TRUE
cg15031996	chr1	113615856	113615857	LRIG2	9860	24	CGI	TRUE	FALSE	FALSE
cg15042692	chr1	1243460	1243461	PUSL1	126789	-532	CGI	TRUE	TRUE	FALSE
cg15064304	chr1	153895398	153895399	GATAD2B	57459	51	CGI	TRUE	FALSE	FALSE
cg15064598	chr1	28879563	28879564	TRNAU1AP	54952	33	CGI	TRUE	FALSE	FALSE
cg15065069	chr1	154974120	154974121	ZBTB7B	51043	-984	CGI	TRUE	FALSE	FALSE
cg15070096	chr1	156470876	156470877	MEF2D	4209	-346	CGI	TRUE	FALSE	FALSE
cg15074876	chr1	110950234	110950235	LAMTOR5	10542	310	CGI	TRUE	FALSE	FALSE
cg15074930	chr1	164528467	164528468	PBX1	5087	-128	CGI-S-Shore	TRUE	FALSE	FALSE
cg15077558	chr1	109655543	109655544	C1orf194	127003	934	CGI	TRUE	TRUE	FALSE
cg15079326	chr1	110882112	110882113	RBM15	64783	166	CGI	TRUE	FALSE	FALSE
cg15084499	chr1	227505916	227505917	CDC42BPA	8476	-89	CGI	TRUE	FALSE	FALSE
cg15089025	chr1	161147190	161147191	B4GALT3	8703	566	CGI	FALSE	TRUE	FALSE
cg15103960	chr1	84764704	84764705	SAMD13	148418	654	CGI	FALSE	TRUE	FALSE
cg15108705	chr1	233749544	233749545	KCNK1	3775	-204	CGI	TRUE	FALSE	FALSE
cg15114107	chr1	228328228	228328229	GUK1	2987	442	CGI	FALSE	TRUE	FALSE
cg15119100	chr1	156675414	156675415	CRABP2	1382	192	CGI	TRUE	TRUE	FALSE
cg15123881	chr1	41328133	41328134	CITED4	163732	-114	CGI	TRUE	FALSE	FALSE
cg15148028	chr1	245755268	245755269	KIF26B	55083	436980	CGI-S-Shore	FALSE	TRUE	FALSE
cg15198235	chr1	214153645	214153646	PROX1	5629	-7639	CGI-S-Shore	FALSE	FALSE	TRUE
cg15202770	chr1	145397173	145397174	HFE2	148738	-16016	CGI	TRUE	FALSE	FALSE
cg15206621	chr1	180123983	180123984	QSOX1	5768	14	CGI	TRUE	FALSE	FALSE
cg15322430	chr1	40157251	40157252	HPCAL4	51440	-161	CGI	TRUE	FALSE	FALSE
cg15324448	chr1	40915647	40915648	ZFP69B	65243	-125	CGI	TRUE	FALSE	FALSE
cg15328582	chr1	168195103	168195104	SFT2D2	375035	-150	CGI	TRUE	FALSE	FALSE
cg15356516	chr1	221053513	221053514	HLX	3142	769	CGI	TRUE	FALSE	FALSE
cg15359501	chr1	184006496	184006497	GLT25D2	23127	380	CGI	TRUE	TRUE	FALSE
cg15386773	chr1	75139490	75139491	C1orf173	127254	-67	CGI-S-Shore	TRUE	FALSE	FALSE
cg15389472	chr1	182361528	182361529	GLUL	2752	-186	CGI	TRUE	FALSE	FALSE
cg15390554	chr1	2986366	2986367	PRDM16	63976	623	CGI-S-Shore	FALSE	TRUE	FALSE
cg15393441	chr1	67390937	67390938	MIER1	57708	358	CGI	TRUE	TRUE	FALSE
cg15454726	chr1	241587609	241587610	RGS7	6000	-67130	CGI	FALSE	FALSE	TRUE
cg15463775	chr1	93544534	93544535	MTF2	22823	-256	CGI	TRUE	FALSE	FALSE
cg15465571	chr1	17338208	17338209	ATP13A2	23400	213	CGI	FALSE	TRUE	FALSE
cg15468976	chr1	2106222	2106223	C1orf86	199990	32948	CGI	FALSE	TRUE	FALSE
cg15469507	chr1	32229259	32229260	BAI2	576	387	CGI	FALSE	TRUE	FALSE
cg15472210	chr1	232766496	232766497	SIPA1L2	57568	-115252	CGI	FALSE	FALSE	TRUE
cg15472574	chr1	43148457	43148458	YBX1	4904	390	CGI	FALSE	TRUE	FALSE
cg15482690	chr1	11072742	11072743	TARDBP	23435	62	CGI	TRUE	FALSE	FALSE
cg15487600	chr1	155113158	155113159	DPM3	54344	-161	CGI	TRUE	FALSE	FALSE
cg15492466	chr1	8484169	8484170	SLC45A1	50651	99778	CGI	TRUE	TRUE	FALSE
cg15496079	chr1	43282650	43282651	ERMAP	114625	-124	CGI	TRUE	TRUE	FALSE
cg15500320	chr1	59250642	59250643	LOC100131060	100131060	-179	CGI	TRUE	FALSE	FALSE
cg15503006	chr1	178994942	178994943	FAM20B	9917	-130	CGI	TRUE	FALSE	FALSE
cg15503098	chr1	184723524	184723525	EDEM3	80267	515	CGI	FALSE	TRUE	FALSE
cg15504469	chr1	44457406	44457407	CCDC24	149473	125	CGI	TRUE	TRUE	FALSE
cg15518042	chr1	40915896	40915897	ZFP69B	65243	121	CGI	TRUE	TRUE	FALSE
cg15522353	chr1	39547558	39547559	MACF1	23499	468	CGI	FALSE	TRUE	FALSE
cg15525053	chr1	211688778	211688779	RD3	343035	-22518	CGI	FALSE	FALSE	TRUE
cg15528052	chr1	182992114	182992115	LAMC1	3915	-479	CGI	TRUE	FALSE	FALSE
cg15543769	chr1	26496295	26496296	ZNF593	51042	-91	CGI	TRUE	FALSE	FALSE
cg15550572	chr1	2064441	2064442	C1orf86	199990	74729	CGI	FALSE	TRUE	FALSE
cg15556553	chr1	17765043	17765044	RCC2	55920	1205	CGI	TRUE	TRUE	FALSE
cg15556748	chr1	154946326	154946327	SHC1	6464	631	CGI	TRUE	TRUE	FALSE
cg15561201	chr1	24742518	24742519	NIPAL3	57185	272	CGI	TRUE	TRUE	FALSE
cg15572086	chr1	116961459	116961460	ATP1A1OS	84852	-214	CGI	TRUE	FALSE	FALSE
cg15575375	chr1	61649973	61649974	NFIA	4774	107026	CGI	FALSE	TRUE	FALSE
cg15576492	chr1	1015447	1015448	RNF223	401934	-5759	CGI	FALSE	FALSE	TRUE
cg15577575	chr1	145470249	145470250	POLR3GL	84265	136	CGI	TRUE	TRUE	FALSE
cg15583014	chr1	65468659	65468660	JAK1	3716	-36039	CGI	TRUE	FALSE	FALSE
cg15591198	chr1	10003340	10003341	LZIC	84328	85	CGI	TRUE	TRUE	FALSE
cg15592945	chr1	226736711	226736712	C1orf95	375057	209	CGI	TRUE	FALSE	FALSE
cg15598442	chr1	25175063	25175064	CLIC4	25932	103302	CGI	FALSE	FALSE	TRUE
cg15600987	chr1	151483609	151483610	CGN	57530	-251	CGI	TRUE	FALSE	FALSE
cg15604723	chr1	221915518	221915519	DUSP10	11221	-1	CGI	TRUE	FALSE	FALSE
cg15605315	chr1	45957053	45957054	TESK2	10420	-212	CGI	TRUE	FALSE	FALSE
cg15617137	chr1	110527798	110527799	AHCYL1	10768	410	CGI	TRUE	TRUE	FALSE
cg15623149	chr1	40041376	40041377	PABPC4	8761	1143	CGI	FALSE	TRUE	FALSE
cg15627710	chr1	154972140	154972141	ZBTB7B	51043	-2964	CGI	FALSE	FALSE	TRUE
cg15642292	chr1	150253842	150253843	C1orf51	148523	-1109	CGI-N-Shore	TRUE	FALSE	FALSE
cg15642534	chr1	7741065	7741066	VAMP3	9341	-90262	CGI	FALSE	TRUE	FALSE
cg15642704	chr1	32110673	32110674	PEF1	553115	163	CGI	TRUE	FALSE	FALSE
cg15644742	chr1	2344414	2344415	PEX10	5192	-403	CGI	TRUE	FALSE	FALSE
cg15644938	chr1	16679154	16679155	FBXO42	54455	-205	CGI	TRUE	FALSE	FALSE
cg15646763	chr1	22263836	22263837	HSPG2	3339	-85	CGI	TRUE	FALSE	FALSE
cg15651835	chr1	226497333	226497334	LIN9	286826	221	CGI	TRUE	FALSE	FALSE
cg15654121	chr1	34630944	34630945	CSMD2	114784	497	CGI	TRUE	TRUE	FALSE
cg15654259	chr1	116371187	116371188	NHLH2	4808	12558	CGI	FALSE	FALSE	TRUE
cg15673731	chr1	156084691	156084692	LMNA	4000	32321	CGI	TRUE	TRUE	FALSE
cg15674367	chr1	93914789	93914790	FNBP1L	54874	1100	CGI	FALSE	TRUE	FALSE
cg15677368	chr1	245133209	245133210	EFCAB2	84288	37	CGI	TRUE	FALSE	FALSE
cg15685943	chr1	115632272	115632273	TSPAN2	10100	-150	CGI	TRUE	FALSE	FALSE
cg15690092	chr1	26324909	26324910	PAFAH2	5051	-260	CGI	TRUE	FALSE	FALSE
cg15696662	chr1	46669221	46669222	LURAP1	541468	214	CGI	TRUE	TRUE	FALSE
cg15700160	chr1	224033971	224033972	TP53BP2	7159	-296	CGI	TRUE	FALSE	FALSE
cg15703070	chr1	227128038	227128039	ADCK3	56997	43448	CGI	TRUE	TRUE	FALSE
cg15705071	chr1	168105392	168105393	GPR161	23432	1427	CGI	TRUE	TRUE	FALSE
cg15707544	chr1	10093239	10093240	UBE4B	10277	197	CGI	TRUE	FALSE	FALSE
cg15712677	chr1	236157492	236157493	NID1	4811	70987	CGI-S-Shore	FALSE	TRUE	FALSE
cg15714196	chr1	45241175	45241176	RPS8	6202	-69	CGI	TRUE	FALSE	FALSE
cg15717853	chr1	182573596	182573597	RGS16	6004	-47	CGI	TRUE	FALSE	FALSE
cg15719572	chr1	40506319	40506320	CAP1	10487	63	CGI	TRUE	FALSE	FALSE
cg15730680	chr1	202927433	202927434	ADIPOR1	51094	265	CGI	TRUE	TRUE	FALSE
cg15818358	chr1	42501757	42501758	HIVEP3	59269	-160	CGI	TRUE	FALSE	FALSE
cg15822908	chr1	33502755	33502756	AK2	204	-242	CGI	TRUE	FALSE	FALSE
cg15823064	chr1	87794194	87794195	LMO4	8543	42	CGI	TRUE	FALSE	FALSE
cg15823180	chr1	150521836	150521837	ADAMTSL4	54507	-60	CGI	TRUE	FALSE	FALSE
cg15825501	chr1	936610	936611	HES4	57801	-1057	CGI	TRUE	FALSE	FALSE
cg15831200	chr1	110765724	110765725	KCNC4	3749	12387	CGI	FALSE	TRUE	FALSE
cg15834338	chr1	174128942	174128943	RABGAP1L	9910	389	CGI	FALSE	TRUE	FALSE
cg15842317	chr1	159824538	159824539	C1orf204	284677	597	CGI	FALSE	TRUE	FALSE
cg15891747	chr1	202896310	202896311	KLHL12	59349	1415	CGI	TRUE	TRUE	FALSE
cg15896098	chr1	45966115	45966116	MMACHC	25974	258	CGI-S-Shore	TRUE	TRUE	FALSE
cg15901550	chr1	17997619	17997620	ACTL8	81569	-84187	Non-CGI	FALSE	TRUE	FALSE
cg15923100	chr1	211432377	211432378	RCOR3	55758	-329	CGI	TRUE	FALSE	FALSE
cg15923298	chr1	153541104	153541105	S100A2	6273	-2797	CGI	FALSE	FALSE	TRUE
cg15931557	chr1	46598759	46598760	TSPAN1	10103	-41988	CGI	TRUE	TRUE	FALSE
cg15936121	chr1	153700431	153700432	INTS3	65123	-116	CGI	TRUE	FALSE	FALSE
cg15978014	chr1	40420635	40420636	MFSD2A	84879	-147	CGI	TRUE	FALSE	FALSE
cg15987885	chr1	183386054	183386055	NMNAT2	23057	1578	CGI	FALSE	TRUE	FALSE
cg15990192	chr1	116915626	116915627	ATP1A1	476	621	CGI	TRUE	TRUE	FALSE
cg15995771	chr1	59250858	59250859	LOC100131060	100131060	34	CGI	TRUE	FALSE	FALSE
cg16001793	chr1	161369711	161369712	C1orf192	257177	-32046	CGI	TRUE	FALSE	FALSE
cg16003102	chr1	241587783	241587784	RGS7	6000	-67304	CGI	FALSE	FALSE	TRUE
cg16010827	chr1	200708413	200708414	CAMSAP2	23271	-271	CGI	TRUE	FALSE	FALSE
cg16015113	chr1	36024366	36024367	KIAA0319L	79932	-814	CGI-S-Shore	TRUE	TRUE	FALSE
cg16015205	chr1	26606912	26606913	SH3BGRL3	83442	698	CGI-S-Shore	FALSE	TRUE	FALSE
cg16020249	chr1	27930640	27930641	AHDC1	27245	-278	CGI	TRUE	FALSE	FALSE
cg16023415	chr1	20692812	20692813	LOC339505	339505	62473	CGI	FALSE	TRUE	FALSE
cg16025468	chr1	119682959	119682960	WARS2	10352	334	CGI	TRUE	TRUE	FALSE
cg16028793	chr1	212004275	212004276	LPGAT1	9926	-160	CGI	TRUE	FALSE	FALSE
cg16033941	chr1	3527997	3527998	MEGF6	1953	60	CGI	TRUE	FALSE	FALSE
cg16036305	chr1	115053835	115053836	TRIM33	51592	-53	CGI	TRUE	FALSE	FALSE
cg16040838	chr1	12040142	12040143	MFN2	9927	-94	CGI	TRUE	FALSE	FALSE
cg16041806	chr1	173991823	173991824	RC3H1	149041	-29612	CGI	FALSE	FALSE	TRUE
cg16047970	chr1	155904158	155904159	KIAA0907	22889	28	CGI	TRUE	FALSE	FALSE
cg16049364	chr1	244080978	244080979	LOC339529	339529	273	CGI	FALSE	TRUE	FALSE
cg16053142	chr1	54871602	54871603	SSBP3	23648	488	CGI-S-Shore	FALSE	TRUE	FALSE
cg16094412	chr1	6266029	6266030	RNF207	388591	-158	CGI	TRUE	FALSE	FALSE
cg16095542	chr1	155023359	155023360	ADAM15	8751	-61	CGI	TRUE	TRUE	FALSE
cg16105510	chr1	44056971	44056972	KDM4A	9682	-58824	CGI	TRUE	TRUE	FALSE
cg16116244	chr1	16939841	16939842	NBPF1	55672	139	CGI	TRUE	FALSE	FALSE
cg16119246	chr1	210502114	210502115	HHAT	55733	517	CGI	TRUE	TRUE	FALSE
cg16121685	chr1	162467625	162467626	UHMK1	127933	660	CGI	TRUE	TRUE	FALSE
cg16127594	chr1	95393115	95393116	CNN3	1266	-379	CGI	TRUE	FALSE	FALSE
cg16140432	chr1	40943370	40943371	ZFP69	339559	67	CGI	TRUE	FALSE	FALSE
cg16140954	chr1	3816609	3816610	C1orf174	339448	246	CGI	TRUE	TRUE	FALSE
cg16145701	chr1	114472499	114472500	HIPK1	204851	502	CGI	TRUE	TRUE	FALSE
cg16147336	chr1	51435387	51435388	CDKN2C	1031	1778	CGI	TRUE	FALSE	FALSE
cg16163324	chr1	46712932	46712933	RAD54L	8438	-433	CGI	TRUE	FALSE	FALSE
cg16171526	chr1	155043744	155043745	LOC100505666	100505666	-7276	CGI	FALSE	TRUE	FALSE
cg16178998	chr1	231762459	231762460	DISC1	27185	-100	CGI	TRUE	TRUE	FALSE
cg16247817	chr1	153747686	153747687	SLC27A3	11000	-80	CGI	TRUE	FALSE	FALSE
cg16249798	chr1	38325439	38325440	MTF1	4520	-146	CGI	TRUE	FALSE	FALSE
cg16250330	chr1	184943561	184943562	FAM129A	116496	119	CGI	TRUE	FALSE	FALSE
cg16252637	chr1	231004649	231004650	C1orf198	84886	684	CGI	TRUE	TRUE	FALSE
cg16253132	chr1	113249942	113249943	RHOC	389	81	CGI	TRUE	FALSE	FALSE
cg16258463	chr1	93811274	93811275	LOC100131564	100131564	92	CGI	TRUE	TRUE	FALSE
cg16261581	chr1	84972327	84972328	GNG5	2787	-64	CGI	TRUE	TRUE	FALSE
cg16269418	chr1	155043883	155043884	LOC100505666	100505666	-7415	CGI	FALSE	TRUE	FALSE
cg16272484	chr1	17764695	17764696	RCC2	55920	1553	CGI	FALSE	TRUE	FALSE
cg16277479	chr1	13910209	13910210	PDPN	10630	-41	CGI	TRUE	FALSE	FALSE
cg16277706	chr1	90287101	90287102	LRRC8D	55144	527	CGI	TRUE	TRUE	FALSE
cg16290123	chr1	6663532	6663533	KLHL21	9903	-602	CGI	TRUE	FALSE	FALSE
cg16293981	chr1	203097362	203097363	ADORA1	134	525	CGI	TRUE	TRUE	FALSE
cg16296290	chr1	2136845	2136846	C1orf86	199990	2325	CGI	FALSE	TRUE	FALSE
cg16305186	chr1	46049705	46049706	NASP	4678	44	CGI	TRUE	FALSE	FALSE
cg16314058	chr1	43312353	43312354	ZNF691	51058	108	CGI	FALSE	TRUE	FALSE
cg16348470	chr1	34642609	34642610	C1orf94	84970	9984	CGI	TRUE	TRUE	FALSE
cg16352085	chr1	859719	859720	SAMD11	148398	-809	CGI	TRUE	FALSE	FALSE
cg16357661	chr1	242011898	242011899	EXO1	9156	404	CGI	TRUE	TRUE	FALSE
cg16358430	chr1	92952192	92952193	GFI1	2672	239	CGI	TRUE	TRUE	FALSE
cg16361301	chr1	218519549	218519550	TGFB2	7042	872	CGI	TRUE	FALSE	FALSE
cg16365729	chr1	244998894	244998895	COX20	116228	254	CGI	TRUE	FALSE	FALSE
cg16366349	chr1	97187803	97187804	PTBP2	58155	627	CGI	TRUE	TRUE	FALSE
cg16370586	chr1	181287636	181287637	CACNA1E	777	-165048	CGI	FALSE	FALSE	TRUE
cg16371752	chr1	150601789	150601790	ENSA	2029	307	CGI	TRUE	TRUE	FALSE
cg16376691	chr1	100315485	100315486	AGL	178	-153	CGI	TRUE	FALSE	FALSE
cg16379885	chr1	37500369	37500370	GRIK3	2899	-524	CGI	TRUE	FALSE	FALSE
cg16383389	chr1	94312390	94312391	MIR760	100126348	1	CGI	TRUE	TRUE	FALSE
cg16394260	chr1	93811744	93811745	DR1	1810	265	CGI	TRUE	FALSE	FALSE
cg16398686	chr1	94344260	94344261	DNTTIP2	30836	500	CGI	FALSE	TRUE	FALSE
cg16406833	chr1	3568710	3568711	TP73	7161	-417	CGI	TRUE	FALSE	FALSE
cg16409744	chr1	171750782	171750783	METTL13	51603	20	CGI	TRUE	FALSE	FALSE
cg16410706	chr1	212873963	212873964	BATF3	55509	-635	CGI	TRUE	FALSE	FALSE
cg16410890	chr1	227922863	227922864	JMJD4	65094	247	CGI	TRUE	TRUE	FALSE
cg16411216	chr1	9340507	9340508	SPSB1	80176	-12432	CGI	FALSE	FALSE	TRUE
cg16416718	chr1	6844519	6844520	CAMTA1	23261	-863	CGI	TRUE	FALSE	FALSE
cg16417258	chr1	919731	919732	C1orf170	84808	-2257	CGI-S-Shore	FALSE	FALSE	TRUE
cg16418374	chr1	40723914	40723915	ZMPSTE24	10269	180	CGI	TRUE	FALSE	FALSE
cg16431705	chr1	85742210	85742211	LOC646626	646626	168	CGI	TRUE	FALSE	FALSE
cg16488304	chr1	151119217	151119218	SEMA6C	10500	-76	CGI	TRUE	FALSE	FALSE
cg16489895	chr1	156890244	156890245	LRRC71	149499	-178	CGI	TRUE	FALSE	FALSE
cg16491046	chr1	247494983	247494984	ZNF496	84838	60	CGI	TRUE	FALSE	FALSE
cg16491909	chr1	154193730	154193731	C1orf43	25912	-456	CGI	TRUE	TRUE	FALSE
cg16508883	chr1	145092330	145092331	SEC22B	9554	-4075	Non-CGI	FALSE	TRUE	FALSE
cg16529307	chr1	89990087	89990088	LRRC8B	23507	-308	CGI	TRUE	FALSE	FALSE
cg16529530	chr1	32688001	32688002	TMEM234	56063	-74	CGI	TRUE	TRUE	FALSE
cg16531833	chr1	235324411	235324412	RBM34	23029	359	CGI	FALSE	TRUE	FALSE
cg16546309	chr1	244014035	244014036	AKT3	10000	-7148	CGI	FALSE	FALSE	TRUE
cg16549308	chr1	236228755	236228756	NID1	4811	-273	CGI	TRUE	FALSE	FALSE
cg16552589	chr1	197115834	197115835	ASPM	259266	-9	CGI-S-Shore	TRUE	FALSE	FALSE
cg16555184	chr1	149982714	149982715	OTUD7B	56957	-27	CGI	TRUE	FALSE	FALSE
cg16555761	chr1	38455748	38455749	SF3A3	10946	11	CGI	TRUE	FALSE	FALSE
cg16557308	chr1	52082719	52082720	OSBPL9	114883	39867	CGI	TRUE	TRUE	FALSE
cg16558908	chr1	33896237	33896238	PHC2	1912	376	CGI	TRUE	TRUE	FALSE
cg16562251	chr1	166845621	166845622	TADA1	117143	31	CGI	TRUE	FALSE	FALSE
cg16563230	chr1	4714991	4714992	AJAP1	55966	-112	CGI	TRUE	FALSE	FALSE
cg16573178	chr1	49242519	49242520	BEND5	79656	26	CGI	TRUE	TRUE	FALSE
cg16573901	chr1	38061607	38061608	GNL2	29889	-20	CGI	TRUE	FALSE	FALSE
cg16575025	chr1	112281790	112281791	LOC100506343	100506343	-671	CGI	TRUE	TRUE	FALSE
cg16577607	chr1	28585863	28585864	SESN2	83667	-98	CGI	TRUE	FALSE	FALSE
cg16578267	chr1	937048	937049	HES4	57801	-1495	CGI	TRUE	FALSE	FALSE
cg16587623	chr1	47184894	47184895	EFCAB14	9813	-157	CGI	TRUE	FALSE	FALSE
cg16591948	chr1	8716348	8716349	RERE	473	161349	CGI	FALSE	TRUE	FALSE
cg16592623	chr1	181057846	181057847	IER5	51278	207	CGI	TRUE	FALSE	FALSE
cg16596102	chr1	166134346	166134347	FAM78B	149297	1610	CGI	FALSE	TRUE	FALSE
cg16599770	chr1	114447605	114447606	AP4B1	10717	134	CGI	TRUE	FALSE	FALSE
cg16600297	chr1	155113178	155113179	DPM3	54344	-181	CGI	TRUE	FALSE	FALSE
cg16600927	chr1	200708027	200708028	CAMSAP2	23271	-657	CGI	TRUE	FALSE	FALSE
cg16601171	chr1	146644393	146644394	PRKAB2	5565	-263	CGI	TRUE	FALSE	FALSE
cg16601494	chr1	1475737	1475738	TMEM240	339453	1	CGI	TRUE	FALSE	FALSE
cg16632891	chr1	54872978	54872979	SSBP3	23648	-885	CGI	TRUE	FALSE	FALSE
cg16658130	chr1	40942841	40942842	ZFP69	339559	-459	CGI	TRUE	FALSE	FALSE
cg16661813	chr1	59012392	59012393	OMA1	115209	52	CGI	TRUE	FALSE	FALSE
cg16663855	chr1	9820950	9820951	CLSTN1	22883	63598	CGI-N-Shore	FALSE	TRUE	FALSE
cg16663955	chr1	25559140	25559141	SYF2	25949	-126	CGI	TRUE	FALSE	FALSE
cg16664859	chr1	226309452	226309453	H3F3AP4	440926	57773	CGI	FALSE	FALSE	TRUE
cg16676300	chr1	155658576	155658577	DAP3	7818	-304	CGI	TRUE	TRUE	FALSE
cg16678185	chr1	26946851	26946852	MIR1976	100302190	65817	CGI	FALSE	FALSE	TRUE
cg16680018	chr1	165667870	165667871	ALDH9A1	223	28	CGI	TRUE	FALSE	FALSE
cg16681083	chr1	44727237	44727238	DMAP1	55929	48111	Non-CGI	FALSE	TRUE	FALSE
cg16681977	chr1	11332969	11332970	UBIAD1	29914	-284	CGI	TRUE	FALSE	FALSE
cg16695835	chr1	90460886	90460887	ZNF326	284695	207	CGI	TRUE	TRUE	FALSE
cg16699316	chr1	36930075	36930076	MRPS15	64960	-34	CGI	TRUE	FALSE	FALSE
cg16702520	chr1	28157047	28157048	PPP1R8	5511	-203	CGI-N-Shore	TRUE	FALSE	FALSE
cg16704678	chr1	32230177	32230178	BAI2	576	-528	CGI	TRUE	FALSE	FALSE
cg16707128	chr1	38325974	38325975	MTF1	4520	-681	CGI	TRUE	FALSE	FALSE
cg16709384	chr1	113615408	113615409	LRIG2	9860	-421	CGI-N-Shore	TRUE	TRUE	FALSE
cg16718920	chr1	21113643	21113644	HP1BP3	50809	154	CGI	TRUE	TRUE	FALSE
cg16718986	chr1	17306967	17306968	MFAP2	4237	1112	CGI	FALSE	TRUE	FALSE
cg16720365	chr1	26758512	26758513	DHDDS	79947	-259	CGI	TRUE	FALSE	FALSE
cg16721191	chr1	185703526	185703527	HMCN1	83872	-155	CGI	TRUE	FALSE	FALSE
cg16730386	chr1	46269394	46269395	MAST2	23139	108	CGI	TRUE	FALSE	FALSE
cg16822216	chr1	44872502	44872503	RNF220	55182	1541	CGI	FALSE	TRUE	FALSE
cg16897415	chr1	161129615	161129616	USP21	27005	360	CGI	FALSE	TRUE	FALSE
cg16900814	chr1	173990879	173990880	RC3H1	149041	-28668	CGI	FALSE	FALSE	TRUE
cg16905926	chr1	173837512	173837513	ZBTB37	84614	291	CGI	TRUE	TRUE	FALSE
cg16907344	chr1	16174671	16174672	FLJ37453	729614	-28	CGI-S-Shore	TRUE	TRUE	FALSE
cg16925766	chr1	167683831	167683832	MPZL1	9019	-7354	CGI	TRUE	FALSE	FALSE
cg16964809	chr1	233463318	233463319	KIAA1804	84451	-194	CGI	TRUE	FALSE	FALSE
cg16985259	chr1	44412491	44412492	IPO13	9670	12	CGI	TRUE	FALSE	FALSE
cg16987804	chr1	247095607	247095608	AHCTF1	25909	-880	CGI	TRUE	FALSE	FALSE
cg16989107	chr1	46598393	46598394	TSPAN1	10103	-42354	CGI	TRUE	TRUE	FALSE
cg17001101	chr1	48462306	48462307	TRABD2B	388630	254	CGI	FALSE	TRUE	FALSE
cg17014953	chr1	77748136	77748137	AK5	26289	473	CGI	TRUE	TRUE	FALSE
cg17015897	chr1	155293692	155293693	RUSC1-AS1	284618	244	CGI	TRUE	TRUE	FALSE
cg17016978	chr1	155179223	155179224	THBS3	7059	-253	CGI-S-Shore	TRUE	TRUE	FALSE
cg17017152	chr1	61547389	61547390	NFIA	4774	4442	CGI-N-Shore	TRUE	TRUE	FALSE
cg17023648	chr1	23810750	23810751	ASAP3	55616	305	CGI	TRUE	TRUE	FALSE
cg17024258	chr1	160370982	160370983	VANGL2	57216	750	CGI	FALSE	TRUE	FALSE
cg17024643	chr1	214725274	214725275	PTPN14	5784	-249	CGI	TRUE	FALSE	FALSE
cg17025661	chr1	43147900	43147901	YBX1	4904	-164	CGI	TRUE	FALSE	FALSE
cg17034360	chr1	68629032	68629033	MIR1262	100302279	20259	CGI	FALSE	TRUE	FALSE
cg17036024	chr1	161359810	161359811	C1orf192	257177	-22145	CGI	FALSE	FALSE	TRUE
cg17057965	chr1	224301873	224301874	FBXO28	23219	81	CGI	TRUE	FALSE	FALSE
cg17078826	chr1	94713092	94713093	ARHGAP29	9411	27530	CGI	FALSE	TRUE	FALSE
cg17083411	chr1	203274503	203274504	LOC730227	730227	-49	CGI	TRUE	FALSE	FALSE
cg17087479	chr1	214156255	214156256	PROX1	5629	-5029	CGI	FALSE	FALSE	TRUE
cg17094927	chr1	154298080	154298081	ATP8B2	57198	43	CGI	TRUE	FALSE	FALSE
cg17097874	chr1	22968668	22968669	C1QC	714	-1448	Non-CGI	TRUE	FALSE	FALSE
cg17098415	chr1	995021	995022	RNF223	401934	14664	CGI	TRUE	FALSE	FALSE
cg17099671	chr1	2517236	2517237	FAM213B	127281	-661	CGI-N-Shore	TRUE	FALSE	FALSE
cg17101920	chr1	53192387	53192388	ZYG11B	79699	255	CGI	FALSE	TRUE	FALSE
cg17104843	chr1	213032108	213032109	FLVCR1	28982	510	CGI	TRUE	FALSE	FALSE
cg17105151	chr1	32666292	32666293	CCDC28B	79140	89	CGI	TRUE	FALSE	FALSE
cg17105358	chr1	162531703	162531704	UAP1	6675	406	CGI	FALSE	TRUE	FALSE
cg17110006	chr1	178007364	178007365	LOC730102	730102	-221	CGI-S-Shore	TRUE	FALSE	FALSE
cg17130063	chr1	215256448	215256449	KCNK2	3776	77562	CGI	TRUE	TRUE	FALSE
cg17138785	chr1	224622417	224622418	WDR26	80232	-415	CGI	TRUE	FALSE	FALSE
cg17142371	chr1	155278522	155278523	FDPS	2224	-15	CGI	TRUE	FALSE	FALSE
cg17148556	chr1	229643984	229643985	NUP133	55746	102	CGI	TRUE	FALSE	FALSE
cg17149882	chr1	27191573	27191574	SFN	2810	1939	CGI	TRUE	TRUE	FALSE
cg17151058	chr1	172502035	172502036	SUCO	51430	-223	CGI	TRUE	FALSE	FALSE
cg17160590	chr1	222886778	222886779	AIDA	64853	-251	CGI	TRUE	TRUE	FALSE
cg17161388	chr1	37940077	37940078	LOC728431	728431	-32	CGI	TRUE	FALSE	FALSE
[truncated: 66,929 more rows]
