# Supplementary material for: H3K4me1 marks DNA regions hypomethylated during aging in human stem and differentiated cells
Source: HighWire-hosted journal article supplement (doi:10.1101/gr.169011.113), 2014-09-30
Supplement: Supplemental_Table_11.xlsx [file Supplemental_Table_11.xlsx]

## Sheet: ST11
Supplemental Table 11: List of CpG sites identified in MSCs that showed high interindividual variability in both young and old individuals (HV)
Target ID	Chromosome	start	end	nearest.gene	nearest.gene.id	disttotss	hmm.cpgi	prom.reg	intra.reg	inter.reg
cg00003287	chr1	201346149	201346150	TNNT2	7139	654	Non-CGI	FALSE	TRUE	FALSE
cg00060374	chr1	1355235	1355236	ANKRD65	441869	1587	CGI	FALSE	TRUE	FALSE
cg00064255	chr1	90100012	90100013	LRRC8C	84230	1367	CGI	TRUE	TRUE	FALSE
cg00169776	chr1	2948512	2948513	ACTRT2	140625	10465	CGI	FALSE	FALSE	TRUE
cg00172812	chr1	23279685	23279686	LOC729059	729059	62656	CGI	FALSE	FALSE	TRUE
cg00228891	chr1	207818893	207818894	CR1L	1379	434	CGI	FALSE	TRUE	FALSE
cg00256155	chr1	47915647	47915648	FOXD2	2306	13957	CGI	FALSE	FALSE	TRUE
cg00304520	chr1	161582581	161582582	HSPA7	3311	6731	CGI	TRUE	FALSE	FALSE
cg00318756	chr1	67773020	67773021	IL12RB2	3595	-25	CGI	TRUE	FALSE	FALSE
cg00329300	chr1	161008462	161008463	TSTD1	100131187	310	CGI	FALSE	TRUE	FALSE
cg00341060	chr1	8377787	8377788	SLC45A1	50651	-6601	CGI-N-Shore	FALSE	FALSE	TRUE
cg00342358	chr1	92350112	92350113	TGFBR3	7049	21445	CGI-N-Shore	FALSE	TRUE	FALSE
cg00346985	chr1	46940516	46940517	DMBX1	127343	-32150	Non-CGI	FALSE	FALSE	TRUE
cg00349061	chr1	26371865	26371866	SLC30A2	7780	737	CGI-N-Shore	FALSE	TRUE	FALSE
cg00359395	chr1	22228153	22228154	HSPG2	3339	35595	Non-CGI	FALSE	TRUE	FALSE
cg00386984	chr1	2249617	2249618	LOC100129534	100129534	34481	CGI	FALSE	FALSE	TRUE
cg00448707	chr1	68512928	68512929	DIRAS3	9077	3551	CGI	TRUE	TRUE	FALSE
cg00465927	chr1	26190114	26190115	AUNIP	79000	-4265	CGI-S-Shelf	TRUE	TRUE	FALSE
cg00500789	chr1	43751370	43751371	C1orf210	149466	-81	Non-CGI	TRUE	FALSE	FALSE
cg00565688	chr1	3568212	3568213	TP73	7161	-915	CGI	TRUE	FALSE	FALSE
cg00571809	chr1	3397113	3397114	ARHGEF16	27237	25965	CGI	FALSE	TRUE	FALSE
cg00579423	chr1	180923076	180923077	KIAA1614	57710	40762	CGI	FALSE	TRUE	FALSE
cg00698771	chr1	113285940	113285941	FAM19A3	284467	22750	CGI-S-Shore	FALSE	FALSE	TRUE
cg00777636	chr1	6446216	6446217	ACOT7	11332	7608	Non-CGI	TRUE	TRUE	FALSE
cg00784581	chr1	20915592	20915593	CDA	978	147	Non-CGI	TRUE	FALSE	FALSE
cg00786952	chr1	21763130	21763131	NBPF3	84224	-3499	CGI	FALSE	FALSE	TRUE
cg00810939	chr1	24463749	24463750	IL22RA1	58985	6024	Non-CGI	TRUE	TRUE	FALSE
cg00822399	chr1	149146472	149146473	LOC388692	388692	-133002	CGI	FALSE	FALSE	TRUE
cg00827745	chr1	18692019	18692020	KLHDC7A	127707	-115403	CGI	FALSE	TRUE	FALSE
cg00889627	chr1	1959630	1959631	GABRD	2563	8861	CGI	FALSE	TRUE	FALSE
cg00914222	chr1	29585898	29585899	PTPRU	10076	22869	CGI-N-Shore	FALSE	TRUE	FALSE
cg00916255	chr1	170634931	170634932	PRRX1	5396	1617	CGI	FALSE	TRUE	FALSE
cg00965168	chr1	227974541	227974542	PRSS38	339501	-28875	CGI	FALSE	FALSE	TRUE
cg00981070	chr1	2046702	2046703	PRKCZ	5590	64792	CGI	FALSE	TRUE	FALSE
cg01022117	chr1	201258280	201258281	PKP1	5317	5699	Non-CGI	FALSE	TRUE	FALSE
cg01022121	chr1	2410885	2410886	PLCH2	9651	3130	CGI	TRUE	TRUE	FALSE
cg01066472	chr1	75591029	75591030	LHX8	431707	-3088	CGI	FALSE	FALSE	TRUE
cg01074104	chr1	41324394	41324395	CITED4	163732	3622	CGI-N-Shelf	FALSE	FALSE	TRUE
cg01074657	chr1	78511466	78511467	GIPC2	54810	-121	CGI	TRUE	FALSE	FALSE
cg01079738	chr1	182922427	182922428	SHCBP1L	81626	124	CGI	TRUE	FALSE	FALSE
cg01101873	chr1	3269478	3269479	ARHGEF16	27237	-101667	CGI	FALSE	TRUE	FALSE
cg01411786	chr1	201709390	201709391	MIR1231	100302158	-68347	CGI	FALSE	TRUE	FALSE
cg01413848	chr1	3081226	3081227	MIR4251	100422968	36686	CGI	FALSE	TRUE	FALSE
cg01426303	chr1	227962723	227962724	JMJD4	65094	-39610	CGI-N-Shore	FALSE	TRUE	FALSE
cg01439876	chr1	119543336	119543337	TBX15	6913	-11156	CGI	FALSE	FALSE	TRUE
cg01444643	chr1	55504848	55504849	PCSK9	255738	-299	CGI-N-Shore	TRUE	FALSE	FALSE
cg01514357	chr1	2105392	2105393	C1orf86	199990	33778	CGI	FALSE	TRUE	FALSE
cg01514538	chr1	2980380	2980381	FLJ42875	440556	-29	CGI	TRUE	FALSE	FALSE
cg01565291	chr1	245812674	245812675	KIF26B	55083	494386	Non-CGI	FALSE	TRUE	FALSE
cg01567173	chr1	240118350	240118351	RPS7P5	645884	-52472	Non-CGI	FALSE	FALSE	TRUE
cg01713438	chr1	175116228	175116229	KIAA0040	9674	45999	Non-CGI	FALSE	TRUE	FALSE
cg01720475	chr1	4542769	4542770	LOC284661	284661	70657	CGI	FALSE	FALSE	TRUE
cg01780585	chr1	36348359	36348360	2001-08-01	26523	12949	CGI-N-Shore	TRUE	TRUE	FALSE
cg01782826	chr1	167598958	167598959	RCSD1	92241	-514	CGI-N-Shore	TRUE	FALSE	FALSE
cg01914838	chr1	237167651	237167652	RYR2	6262	-38049	CGI	TRUE	FALSE	FALSE
cg01915516	chr1	3568243	3568244	TP73	7161	-884	CGI	TRUE	FALSE	FALSE
cg01949993	chr1	183155116	183155117	LAMC2	3918	-56	CGI-N-Shore	TRUE	FALSE	FALSE
cg02008416	chr1	55445880	55445881	TMEM61	199964	-583	CGI	TRUE	FALSE	FALSE
cg02054776	chr1	165326345	165326346	LMX1A	4009	-392	CGI-S-Shore	TRUE	FALSE	FALSE
cg02096887	chr1	10699831	10699832	CASZ1	54897	156874	CGI	FALSE	TRUE	FALSE
cg02237987	chr1	156897441	156897442	LRRC71	149499	7016	CGI	FALSE	TRUE	FALSE
cg02295872	chr1	228131977	228131978	WNT9A	7483	3697	CGI-N-Shelf	FALSE	TRUE	FALSE
cg02328793	chr1	6446234	6446235	ACOT7	11332	7590	Non-CGI	TRUE	TRUE	FALSE
cg02334770	chr1	1190798	1190799	FAM132A	388581	-8695	CGI	FALSE	TRUE	FALSE
cg02356786	chr1	243265016	243265017	LOC731275	731275	28	CGI	TRUE	FALSE	FALSE
cg02362103	chr1	119532773	119532774	TBX15	6913	-593	CGI-S-Shore	TRUE	FALSE	FALSE
cg02390319	chr1	3310268	3310269	ARHGEF16	27237	-60877	CGI	FALSE	TRUE	FALSE
cg02483735	chr1	37051530	37051531	CSF3R	1441	-102614	Non-CGI	FALSE	FALSE	TRUE
cg02576395	chr1	27884179	27884180	AHDC1	27245	46180	Non-CGI	FALSE	TRUE	FALSE
cg02577267	chr1	240656513	240656514	GREM2	64388	118947	CGI	TRUE	TRUE	FALSE
cg02630477	chr1	40388223	40388224	MYCL1	4610	-20535	CGI	FALSE	FALSE	TRUE
cg02710296	chr1	182921851	182921852	SHCBP1L	81626	700	CGI	FALSE	TRUE	FALSE
cg02769477	chr1	17012728	17012729	MIR3675	100500876	4977	CGI	FALSE	FALSE	TRUE
cg02773945	chr1	200011858	200011859	NR5A2	2494	15087	CGI	TRUE	TRUE	FALSE
cg02896835	chr1	92012615	92012616	CDC7	8317	46210	CGI	FALSE	FALSE	TRUE
cg02897008	chr1	4188697	4188698	LOC728716	728716	188024	CGI-S-Shore	FALSE	FALSE	TRUE
cg02959988	chr1	40075124	40075125	HEYL	26508	30222	CGI	FALSE	FALSE	TRUE
cg02960125	chr1	182025752	182025753	ZNF648	127665	5093	CGI	TRUE	TRUE	FALSE
cg02970551	chr1	25257191	25257192	RUNX3	864	34419	CGI	TRUE	TRUE	FALSE
cg03001333	chr1	2005560	2005561	PRKCZ	5590	23650	CGI	TRUE	TRUE	FALSE
cg03003335	chr1	1229351	1229352	SCNN1D	6339	13534	CGI	FALSE	TRUE	FALSE
cg03054277	chr1	228400217	228400218	OBSCN	84033	4355	CGI	FALSE	TRUE	FALSE
cg03056854	chr1	20005414	20005415	HTR6	3362	13633	CGI-N-Shore	FALSE	TRUE	FALSE
cg03102494	chr1	147801721	147801722	PPIAL4B	653505	153696	CGI	FALSE	TRUE	FALSE
cg03126058	chr1	3282757	3282758	ARHGEF16	27237	-88388	CGI	FALSE	TRUE	FALSE
cg03130248	chr1	245524538	245524539	KIF26B	55083	206250	CGI	FALSE	TRUE	FALSE
cg03148373	chr1	898852	898853	KLHL17	339451	2884	CGI	FALSE	TRUE	FALSE
cg03321020	chr1	11958326	11958327	KIAA2013	90231	28157	CGI	FALSE	FALSE	TRUE
cg03340606	chr1	1115575	1115576	TTLL10	254173	6288	CGI	TRUE	TRUE	FALSE
cg03343063	chr1	16023706	16023707	PLEKHM2	23207	12878	Non-CGI	FALSE	TRUE	FALSE
cg03470939	chr1	19669159	19669160	PQLC2	54896	30418	CGI	FALSE	TRUE	FALSE
cg03541887	chr1	248903323	248903324	LYPD8	646627	-171	Non-CGI	TRUE	FALSE	FALSE
cg03547078	chr1	1855303	1855304	TMEM52	339456	-4562	CGI	FALSE	TRUE	FALSE
cg03599978	chr1	219834537	219834538	RNU5F-1	26828	-212080	Non-CGI	FALSE	FALSE	TRUE
cg03601886	chr1	53649218	53649219	CPT2	1376	-12881	Non-CGI	FALSE	FALSE	TRUE
cg03607680	chr1	48450020	48450021	TRABD2B	388630	12540	CGI	FALSE	TRUE	FALSE
cg03612357	chr1	227162127	227162128	ADCK3	56997	77537	CGI-N-Shore	FALSE	TRUE	FALSE
cg03614954	chr1	24439418	24439419	MYOM3	127294	-752	CGI-S-Shore	TRUE	FALSE	FALSE
cg03650119	chr1	228346014	228346015	IBA57	200205	-7413	CGI	TRUE	TRUE	FALSE
cg03716999	chr1	6265802	6265803	RNF207	388591	-385	CGI-S-Shore	TRUE	FALSE	FALSE
cg03748376	chr1	248100585	248100586	OR2L13	284521	91	CGI	TRUE	FALSE	FALSE
cg03754582	chr1	35442255	35442256	ZMYM6NB	100506144	8691	CGI-N-Shore	FALSE	TRUE	FALSE
cg03760518	chr1	3634903	3634904	TP73-AS1	57212	29032	CGI	FALSE	TRUE	FALSE
cg03901660	chr1	221050459	221050460	HLX	3142	-2282	CGI	FALSE	FALSE	TRUE
cg03936663	chr1	218098422	218098423	SPATA17	128153	293726	CGI	FALSE	FALSE	TRUE
cg03951833	chr1	147801103	147801104	PPIAL4B	653505	154314	CGI	TRUE	TRUE	FALSE
cg03955334	chr1	5661803	5661804	MIR4417	100616489	37671	CGI-N-Shore	FALSE	TRUE	FALSE
cg03961283	chr1	223566761	223566762	C1orf65	164127	45	CGI	TRUE	FALSE	FALSE
cg03969696	chr1	150229580	150229581	CA14	23632	-636	Non-CGI	TRUE	FALSE	FALSE
cg03969902	chr1	2980546	2980547	FLJ42875	440556	-195	CGI	TRUE	FALSE	FALSE
cg03987199	chr1	29189655	29189656	EPB41	2035	-23946	CGI	FALSE	TRUE	FALSE
cg04025049	chr1	239987399	239987400	RPS7P5	645884	-183423	Non-CGI	FALSE	TRUE	FALSE
cg04028570	chr1	248100427	248100428	OR2L13	284521	-64	CGI	TRUE	FALSE	FALSE
cg04031507	chr1	35334359	35334360	SMIM12	113444	-8941	CGI	FALSE	TRUE	FALSE
cg04078980	chr1	228291486	228291487	C1orf35	79169	-463	CGI-S-Shore	TRUE	FALSE	FALSE
cg04093381	chr1	9292094	9292095	H6PD	9563	-2767	CGI-N-Shelf	FALSE	FALSE	TRUE
cg04117972	chr1	227635322	227635323	ZNF678	339500	-115896	CGI	FALSE	FALSE	TRUE
cg04123310	chr1	27677072	27677073	SYTL1	84958	8588	CGI	FALSE	TRUE	FALSE
cg04143909	chr1	234367322	234367323	MIR4671	100616380	-74889	CGI	FALSE	TRUE	FALSE
cg04166042	chr1	50896246	50896247	DMRTA2	63950	-7126	CGI-S-Shelf	FALSE	FALSE	TRUE
cg04205715	chr1	35259937	35259938	GJA4	2701	1765	CGI	TRUE	TRUE	FALSE
cg04218880	chr1	40388264	40388265	MYCL1	4610	-20576	CGI	FALSE	FALSE	TRUE
cg04233421	chr1	38679372	38679373	LOC339442	339442	1065	CGI-N-Shore	FALSE	TRUE	FALSE
cg04287574	chr1	201619622	201619623	NAV1	89796	2171	CGI	FALSE	TRUE	FALSE
cg04296699	chr1	151810904	151810905	LOC100132111	100132111	-39	CGI	TRUE	TRUE	FALSE
cg04314111	chr1	2003577	2003578	PRKCZ	5590	21667	CGI	TRUE	TRUE	FALSE
cg04315214	chr1	2043799	2043800	PRKCZ	5590	61889	CGI-S-Shelf	FALSE	TRUE	FALSE
cg04341461	chr1	2410006	2410007	PLCH2	9651	2251	CGI-S-Shore	TRUE	TRUE	FALSE
cg04360793	chr1	79472361	79472362	ELTD1	64123	132	CGI	TRUE	FALSE	FALSE
cg04484550	chr1	2980163	2980164	FLJ42875	440556	185	CGI	TRUE	FALSE	FALSE
cg04562683	chr1	3638722	3638723	TP73-AS1	57212	25213	CGI-S-Shelf	FALSE	TRUE	FALSE
cg04565261	chr1	240161061	240161062	RPS7P5	645884	-9761	CGI	FALSE	FALSE	TRUE
cg04571522	chr1	4468089	4468090	LOC284661	284661	-4020	CGI-N-Shelf	FALSE	FALSE	TRUE
cg04725166	chr1	7887271	7887272	PER3	8863	42890	CGI	FALSE	TRUE	FALSE
cg04778236	chr1	9400739	9400740	SPSB1	80176	47797	Non-CGI	FALSE	TRUE	FALSE
cg04781796	chr1	1959747	1959748	GABRD	2563	8978	CGI	FALSE	TRUE	FALSE
cg04850059	chr1	225883161	225883162	ENAH	55740	-42315	Non-CGI	FALSE	FALSE	TRUE
cg04892182	chr1	33231382	33231383	KIAA1522	57648	23869	Non-CGI	TRUE	TRUE	FALSE
cg04908380	chr1	47915862	47915863	FOXD2	2306	14172	CGI	FALSE	FALSE	TRUE
cg04926766	chr1	223567002	223567003	C1orf65	164127	286	CGI	TRUE	FALSE	FALSE
cg04981885	chr1	160991156	160991157	TSTD1	100131187	17616	CGI	TRUE	TRUE	FALSE
cg04990202	chr1	153581750	153581751	S100A16	140576	3762	Non-CGI	TRUE	TRUE	FALSE
cg05021743	chr1	151810893	151810894	LOC100132111	100132111	-50	CGI	TRUE	TRUE	FALSE
cg05053440	chr1	227748442	227748443	ZNF678	339500	-2776	CGI	FALSE	FALSE	TRUE
cg05139515	chr1	2896587	2896588	ACTRT2	140625	-41457	CGI-N-Shelf	FALSE	FALSE	TRUE
cg05162523	chr1	25240938	25240939	RUNX3	864	50672	CGI	FALSE	TRUE	FALSE
cg05303132	chr1	2984631	2984632	FLJ42875	440556	-341	CGI	TRUE	FALSE	FALSE
cg05304531	chr1	26797576	26797577	HMGN2	3151	-1324	CGI-N-Shore	TRUE	TRUE	FALSE
cg05337761	chr1	2121349	2121350	C1orf86	199990	17821	CGI	TRUE	TRUE	FALSE
cg05350800	chr1	178550844	178550845	C1orf220	400798	38912	Non-CGI	FALSE	FALSE	TRUE
cg05400883	chr1	244374397	244374398	C1orf100	200159	-141538	CGI	FALSE	FALSE	TRUE
cg05630111	chr1	150948030	150948031	CERS2	29956	-550	CGI-S-Shore	TRUE	FALSE	FALSE
cg05654059	chr1	1957805	1957806	GABRD	2563	7036	CGI	FALSE	TRUE	FALSE
cg05655011	chr1	29189486	29189487	EPB41	2035	-24115	CGI	FALSE	TRUE	FALSE
cg05656442	chr1	111175082	111175083	KCNA2	3737	-985	Non-CGI	TRUE	FALSE	FALSE
cg05694921	chr1	29587117	29587118	PTPRU	10076	24088	CGI	FALSE	TRUE	FALSE
cg05706898	chr1	1115920	1115921	TTLL10	254173	6633	CGI	TRUE	TRUE	FALSE
cg05781641	chr1	91870450	91870451	HFM1	164045	-23	CGI-S-Shore	TRUE	FALSE	FALSE
cg05803631	chr1	7844446	7844447	PER3	8863	65	CGI	TRUE	TRUE	FALSE
cg05845757	chr1	36039885	36039886	TFAP2E	339488	913	CGI	FALSE	TRUE	FALSE
cg05927190	chr1	54203548	54203549	GLIS1	148979	-3670	CGI	FALSE	FALSE	TRUE
cg05929019	chr1	183155154	183155155	LAMC2	3918	-18	CGI-N-Shore	TRUE	FALSE	FALSE
cg05930496	chr1	201646107	201646108	NAV1	89796	28656	Non-CGI	FALSE	TRUE	FALSE
cg05940691	chr1	241912764	241912765	WDR64	128025	97183	Non-CGI	FALSE	TRUE	FALSE
cg06033579	chr1	12662841	12662842	DHRS3	9249	14977	Non-CGI	FALSE	TRUE	FALSE
cg06087349	chr1	214154085	214154086	PROX1	5629	-7199	CGI-S-Shore	FALSE	FALSE	TRUE
cg06092702	chr1	163392909	163392910	NUF2	83540	101185	CGI	FALSE	FALSE	TRUE
cg06188545	chr1	156863643	156863644	PEAR1	375033	119	CGI	FALSE	TRUE	FALSE
cg06203364	chr1	2137307	2137308	C1orf86	199990	1863	CGI	FALSE	TRUE	FALSE
cg06221449	chr1	29102029	29102030	OPRD1	4985	-36623	CGI	FALSE	FALSE	TRUE
cg06221680	chr1	151689396	151689397	CELF3	11189	-105	Non-CGI	TRUE	TRUE	FALSE
cg06316219	chr1	2834040	2834041	ACTRT2	140625	-104004	CGI	FALSE	FALSE	TRUE
cg06320401	chr1	48176755	48176756	FOXD2	2306	275065	CGI	FALSE	FALSE	TRUE
cg06355129	chr1	156646293	156646294	NES	10763	894	CGI-N-Shore	TRUE	FALSE	FALSE
cg06377106	chr1	20618331	20618332	VWA5B1	127731	918	Non-CGI	FALSE	TRUE	FALSE
cg06379192	chr1	3157287	3157288	MIR4251	100422968	112747	CGI	FALSE	TRUE	FALSE
cg06419732	chr1	205498530	205498531	CDK18	5129	24845	CGI	FALSE	TRUE	FALSE
cg06511312	chr1	3459949	3459950	MIR551A	693135	17403	CGI-N-Shore	FALSE	TRUE	FALSE
cg06532546	chr1	2886654	2886655	ACTRT2	140625	-51390	CGI	FALSE	FALSE	TRUE
cg06615380	chr1	1072902	1072903	LOC254099	254099	504	CGI-S-Shore	FALSE	TRUE	FALSE
cg06637812	chr1	203293433	203293434	BTG2	7832	18768	CGI-N-Shelf	FALSE	FALSE	TRUE
cg06662140	chr1	18809297	18809298	KLHDC7A	127707	1872	CGI	TRUE	FALSE	FALSE
cg06745753	chr1	45190297	45190298	KIF2C	11004	-15191	CGI	FALSE	TRUE	FALSE
cg06748470	chr1	65467980	65467981	JAK1	3716	-35360	CGI	FALSE	TRUE	FALSE
cg06757383	chr1	2008579	2008580	PRKCZ	5590	26669	CGI	FALSE	TRUE	FALSE
cg06766016	chr1	45278971	45278972	BTBD19	149478	4816	CGI	FALSE	TRUE	FALSE
cg06800235	chr1	7692367	7692368	VAMP3	9341	-138960	Non-CGI	FALSE	TRUE	FALSE
cg06802641	chr1	1267252	1267253	TAS1R3	83756	525	CGI	FALSE	TRUE	FALSE
cg06809252	chr1	110612044	110612045	ALX3	257	1276	CGI	FALSE	TRUE	FALSE
cg06829686	chr1	47910843	47910844	FOXD2	2306	9153	CGI	FALSE	FALSE	TRUE
cg06866827	chr1	2948464	2948465	ACTRT2	140625	10417	CGI	FALSE	FALSE	TRUE
cg06895831	chr1	94587076	94587077	ABCA4	24	-370	Non-CGI	TRUE	FALSE	FALSE
cg06906952	chr1	244230760	244230761	ZBTB18	10472	16198	Non-CGI	FALSE	FALSE	TRUE
cg06936155	chr1	91192451	91192452	BARHL2	343472	-9656	CGI	FALSE	FALSE	TRUE
cg06939851	chr1	226112534	226112535	LEFTY1	10637	-568	CGI	TRUE	FALSE	FALSE
cg06942637	chr1	153633895	153633896	SNAPIN	23557	2749	CGI-S-Shelf	FALSE	TRUE	FALSE
cg06946837	chr1	53972003	53972004	DMRTB1	63948	46930	Non-CGI	FALSE	TRUE	FALSE
cg06955484	chr1	47695408	47695409	TAL1	6886	2482	CGI	TRUE	TRUE	FALSE
cg06993467	chr1	21966500	21966501	RAP1GAP	5909	29354	CGI	FALSE	TRUE	FALSE
cg07005055	chr1	113052167	113052168	WNT2B	7482	42126	CGI	FALSE	TRUE	FALSE
cg07008784	chr1	205498551	205498552	CDK18	5129	24866	CGI	FALSE	TRUE	FALSE
cg07015749	chr1	6085995	6085996	NPHP4	261734	-33461	CGI-N-Shore	TRUE	TRUE	FALSE
cg07105421	chr1	1905575	1905576	KIAA1751	85452	29699	CGI-N-Shore	FALSE	TRUE	FALSE
cg07105947	chr1	35586588	35586589	ZMYM1	79830	41615	CGI	FALSE	FALSE	TRUE
cg07135032	chr1	165322099	165322100	LMX1A	4009	3851	CGI	FALSE	TRUE	FALSE
cg07146104	chr1	16489048	16489049	EPHA2	1969	-6465	CGI	FALSE	FALSE	TRUE
cg07167423	chr1	36042986	36042987	TFAP2E	339488	4014	CGI	FALSE	TRUE	FALSE
cg07181952	chr1	1239999	1240000	PUSL1	126789	-3993	CGI-S-Shore	TRUE	TRUE	FALSE
cg07192718	chr1	55445837	55445838	TMEM61	199964	-626	CGI-N-Shore	TRUE	FALSE	FALSE
cg07204739	chr1	228238553	228238554	ARF1	375	-31806	Non-CGI	FALSE	TRUE	FALSE
cg07209987	chr1	10221203	10221204	KIF1B	23095	-49559	Non-CGI	FALSE	TRUE	FALSE
cg07233230	chr1	241912768	241912769	WDR64	128025	97187	Non-CGI	FALSE	TRUE	FALSE
cg07346648	chr1	1266657	1266658	TAS1R3	83756	-67	CGI-S-Shore	TRUE	FALSE	FALSE
cg07376547	chr1	48058877	48058878	FOXD2	2306	157187	CGI	FALSE	FALSE	TRUE
cg07425646	chr1	4221616	4221617	LOC728716	728716	220943	CGI	FALSE	FALSE	TRUE
cg07575466	chr1	40769708	40769709	COL9A2	1298	13350	CGI	FALSE	TRUE	FALSE
cg07584855	chr1	221055545	221055546	HLX	3142	2801	CGI	FALSE	TRUE	FALSE
cg07601804	chr1	9023134	9023135	CA6	765	17211	Non-CGI	FALSE	TRUE	FALSE
cg07700843	chr1	2391317	2391318	PLCH2	9651	-16435	CGI	FALSE	FALSE	TRUE
cg07806674	chr1	27994978	27994979	IFI6	2537	3744	CGI	FALSE	TRUE	FALSE
cg07817967	chr1	184721222	184721223	EDEM3	80267	2817	CGI-N-Shelf	FALSE	TRUE	FALSE
cg07825681	chr1	95975755	95975756	FLJ31662	440594	35461	Non-CGI	TRUE	FALSE	FALSE
cg07832006	chr1	115397374	115397375	SYCP1	6847	-79	CGI-N-Shore	TRUE	FALSE	FALSE
cg07832111	chr1	245846143	245846144	KIF26B	55083	527855	CGI-S-Shore	FALSE	TRUE	FALSE
cg07906262	chr1	41303570	41303571	CITED4	163732	24446	CGI	FALSE	TRUE	FALSE
cg07906828	chr1	2782967	2782968	TTC34	100287898	-76736	CGI-N-Shore	FALSE	FALSE	TRUE
cg07953201	chr1	245851802	245851803	KIF26B	55083	533514	CGI	FALSE	TRUE	FALSE
cg08128274	chr1	206832043	206832044	DYRK3	8444	23161	Non-CGI	FALSE	TRUE	FALSE
cg08130307	chr1	150510625	150510626	ADAMTSL4	54507	-11271	Non-CGI	FALSE	FALSE	TRUE
cg08133631	chr1	26527909	26527910	CATSPER4	378807	10789	Non-CGI	FALSE	TRUE	FALSE
cg08141956	chr1	17746840	17746841	RCC2	55920	19408	CGI-S-Shore	FALSE	TRUE	FALSE
cg08159989	chr1	205326071	205326072	KLHDC8A	55220	93	Non-CGI	TRUE	TRUE	FALSE
cg08241939	chr1	204700816	204700817	LRRN2	10446	-46218	Non-CGI	FALSE	FALSE	TRUE
cg08249619	chr1	205498018	205498019	CDK18	5129	24333	CGI-N-Shore	FALSE	TRUE	FALSE
cg08258582	chr1	48058985	48058986	FOXD2	2306	157295	CGI	FALSE	FALSE	TRUE
cg08264835	chr1	20716191	20716192	LOC339505	339505	39094	Non-CGI	FALSE	TRUE	FALSE
cg08456859	chr1	48450143	48450144	TRABD2B	388630	12417	CGI	FALSE	TRUE	FALSE
cg08484080	chr1	1986139	1986140	PRKCZ	5590	4229	CGI-N-Shore	FALSE	TRUE	FALSE
cg08531380	chr1	12270887	12270888	MIR4632	100616438	19124	Non-CGI	FALSE	FALSE	TRUE
cg08641866	chr1	1141790	1141791	TNFRSF18	8784	297	CGI	TRUE	FALSE	FALSE
cg08655953	chr1	2425888	2425889	PLCH2	9651	18133	CGI-S-Shore	FALSE	TRUE	FALSE
cg08709360	chr1	1003376	1003377	RNF223	401934	6309	CGI	FALSE	FALSE	TRUE
cg08713722	chr1	38942976	38942977	LOC339442	339442	-262536	CGI-S-Shore	FALSE	FALSE	TRUE
cg08715595	chr1	45009266	45009267	TMEM53	79639	130831	Non-CGI	FALSE	TRUE	FALSE
cg08843283	chr1	32826969	32826970	FAM229A	100128071	873	CGI	TRUE	TRUE	FALSE
cg08847173	chr1	31654792	31654793	NKAIN1	79570	57940	CGI	FALSE	TRUE	FALSE
cg08851727	chr1	6296770	6296771	ICMT	23463	-725	CGI	TRUE	FALSE	FALSE
cg08855395	chr1	231296818	231296819	TRIM67	440730	-1854	CGI	TRUE	FALSE	FALSE
cg08857729	chr1	67217826	67217827	TCTEX1D1	200132	-312	CGI	TRUE	FALSE	FALSE
cg08867825	chr1	102312608	102312609	DNAJA1P5	94236	-24957	Non-CGI	TRUE	TRUE	FALSE
cg08883223	chr1	197888880	197888881	LHX9	56956	7244	CGI	FALSE	TRUE	FALSE
cg08886482	chr1	9648699	9648700	TMEM201	199953	-231	CGI	TRUE	FALSE	FALSE
cg08886676	chr1	6328827	6328828	GPR153	387509	-7791	CGI	FALSE	TRUE	FALSE
cg08887707	chr1	3613723	3613724	TP73	7161	44593	CGI-N-Shore	TRUE	TRUE	FALSE
cg08892600	chr1	223538601	223538602	SUSD4	55061	-1056	CGI	TRUE	FALSE	FALSE
cg08926642	chr1	7887455	7887456	PER3	8863	43074	CGI	FALSE	TRUE	FALSE
cg09073059	chr1	1490216	1490217	TMEM240	339453	-14475	CGI-S-Shore	FALSE	TRUE	FALSE
cg09074856	chr1	2979817	2979818	FLJ42875	440556	531	CGI	TRUE	FALSE	FALSE
cg09126090	chr1	1534514	1534515	C1orf233	643988	960	CGI	TRUE	FALSE	FALSE
cg09143801	chr1	151105049	151105050	SEMA6C	10500	14089	CGI	FALSE	TRUE	FALSE
cg09179248	chr1	2046783	2046784	PRKCZ	5590	64873	CGI	FALSE	TRUE	FALSE
cg09179249	chr1	10732900	10732901	CASZ1	54897	123805	CGI	FALSE	TRUE	FALSE
cg09180894	chr1	3395053	3395054	ARHGEF16	27237	23905	CGI	FALSE	TRUE	FALSE
cg09227621	chr1	228225606	228225607	WNT3A	89780	30882	CGI	FALSE	TRUE	FALSE
cg09232440	chr1	39956722	39956723	BMP8A	353500	-594	CGI	TRUE	FALSE	FALSE
cg09250199	chr1	92415145	92415146	BRDT	676	216	CGI	TRUE	TRUE	FALSE
cg09251600	chr1	179781780	179781781	TOR1AIP2	163590	65159	CGI	FALSE	TRUE	FALSE
cg09254318	chr1	160079657	160079658	ATP1A2	477	-5861	Non-CGI	FALSE	FALSE	TRUE
cg09257635	chr1	228346181	228346182	IBA57	200205	-7246	CGI	TRUE	TRUE	FALSE
cg09272923	chr1	7730096	7730097	VAMP3	9341	-101231	Non-CGI	TRUE	TRUE	FALSE
cg09315172	chr1	1860133	1860134	TMEM52	339456	-9392	CGI-S-Shore	TRUE	FALSE	FALSE
cg09322616	chr1	2040400	2040401	PRKCZ	5590	58490	CGI	FALSE	TRUE	FALSE
cg09363841	chr1	37513479	37513480	GRIK3	2899	-13634	CGI	FALSE	FALSE	TRUE
cg09473826	chr1	175568216	175568217	TNR	7143	144534	CGI-N-Shore	FALSE	TRUE	FALSE
cg09506600	chr1	248100228	248100229	OR2L13	284521	-263	CGI	TRUE	FALSE	FALSE
cg09511896	chr1	228246937	228246938	ARF1	375	-23422	CGI	FALSE	TRUE	FALSE
cg09667775	chr1	6170013	6170014	CHD5	26038	70179	CGI	FALSE	TRUE	FALSE
cg09787089	chr1	54739176	54739177	MRPL37	51253	73335	Non-CGI	FALSE	TRUE	FALSE
cg09800633	chr1	3808169	3808170	C1orf174	339448	8686	CGI	FALSE	TRUE	FALSE
cg09804503	chr1	33231313	33231314	KIAA1522	57648	23800	Non-CGI	TRUE	TRUE	FALSE
cg09809932	chr1	6515597	6515598	TNFRSF25	8718	10656	CGI	FALSE	TRUE	FALSE
cg09810089	chr1	211652688	211652689	RD3	343035	13569	CGI	FALSE	TRUE	FALSE
cg09864227	chr1	1008207	1008208	RNF223	401934	1478	CGI-S-Shore	TRUE	TRUE	FALSE
cg09870910	chr1	1222942	1222943	SCNN1D	6339	7125	CGI	FALSE	TRUE	FALSE
cg09871471	chr1	121260900	121260901	EMBP1	647121	-8	CGI	TRUE	FALSE	FALSE
cg09896412	chr1	98519101	98519102	MIR137	406928	-7373	CGI	FALSE	FALSE	TRUE
cg10052561	chr1	40137185	40137186	NT5C1A	84618	523	CGI	FALSE	TRUE	FALSE
cg10089626	chr1	45969600	45969601	MMACHC	25974	3743	CGI-S-Shelf	FALSE	TRUE	FALSE
cg10092377	chr1	200880981	200880982	C1orf106	55765	20353	CGI	FALSE	TRUE	FALSE
cg10096100	chr1	26503862	26503863	CNKSR1	10256	-117	Non-CGI	TRUE	FALSE	FALSE
cg10121294	chr1	26516508	26516509	CATSPER4	378807	-609	Non-CGI	TRUE	FALSE	FALSE
cg10126324	chr1	1052600	1052601	C1orf159	54991	-863	CGI-S-Shore	TRUE	FALSE	FALSE
cg10146935	chr1	871308	871309	SAMD11	148398	10777	CGI	FALSE	TRUE	FALSE
cg10167378	chr1	228756711	228756712	DUSP5P1	574029	-23681	CGI	FALSE	FALSE	TRUE
cg10195763	chr1	2246864	2246865	LOC100129534	100129534	37234	CGI	FALSE	FALSE	TRUE
cg10197057	chr1	42612518	42612519	GUCA2B	2981	-6572	CGI-S-Shore	FALSE	FALSE	TRUE
cg10201191	chr1	3163472	3163473	MIR4251	100422968	118932	CGI	FALSE	TRUE	FALSE
cg10201533	chr1	917661	917662	C1orf170	84808	-187	CGI	TRUE	FALSE	FALSE
cg10208113	chr1	1179747	1179748	FAM132A	388581	2353	CGI	FALSE	TRUE	FALSE
cg10230190	chr1	85405081	85405082	LPAR3	23566	-46184	Non-CGI	FALSE	TRUE	FALSE
cg10386298	chr1	221050491	221050492	HLX	3142	-2250	CGI	FALSE	FALSE	TRUE
cg10400362	chr1	4832549	4832550	AJAP1	55966	117443	CGI	FALSE	TRUE	FALSE
cg10402321	chr1	26617780	26617781	SH3BGRL3	83442	11566	Non-CGI	FALSE	TRUE	FALSE
cg10493186	chr1	3134756	3134757	MIR4251	100422968	90216	CGI	FALSE	TRUE	FALSE
cg10501210	chr1	207997020	207997021	LOC148696	148696	5295	CGI-N-Shore	TRUE	FALSE	FALSE
cg10521153	chr1	91307077	91307078	BARHL2	343472	-124282	CGI	FALSE	TRUE	FALSE
cg10523679	chr1	76189770	76189771	ACADM	34	-271	CGI-N-Shore	TRUE	FALSE	FALSE
cg10533103	chr1	212688961	212688962	ATF3	467	-49713	CGI	FALSE	FALSE	TRUE
cg10622019	chr1	4221485	4221486	LOC728716	728716	220812	CGI	FALSE	FALSE	TRUE
cg10626816	chr1	39025249	39025250	MYCBP	26292	313799	CGI	FALSE	FALSE	TRUE
cg10627839	chr1	196866512	196866513	CFHR2	3080	-46420	CGI	FALSE	TRUE	FALSE
cg10633601	chr1	47696701	47696702	TAL1	6886	1189	CGI	TRUE	TRUE	FALSE
cg10636760	chr1	2904595	2904596	ACTRT2	140625	-33449	Non-CGI	FALSE	FALSE	TRUE
cg10781408	chr1	151810899	151810900	LOC100132111	100132111	-44	CGI	TRUE	TRUE	FALSE
cg10801633	chr1	10579190	10579191	PEX14	5195	44186	Non-CGI	FALSE	TRUE	FALSE
cg10815625	chr1	165323768	165323769	LMX1A	4009	2182	CGI	FALSE	TRUE	FALSE
cg10837110	chr1	1957711	1957712	GABRD	2563	6942	CGI	FALSE	TRUE	FALSE
cg10841756	chr1	161059267	161059268	PVRL4	81607	116	Non-CGI	TRUE	FALSE	FALSE
cg10959932	chr1	53661861	53661862	CPT2	1376	-238	CGI-N-Shore	TRUE	FALSE	FALSE
cg10962762	chr1	228075749	228075750	WNT9A	7483	59925	CGI	FALSE	FALSE	TRUE
cg10987926	chr1	1490906	1490907	TMEM240	339453	-15165	CGI-S-Shore	FALSE	TRUE	FALSE
cg10994944	chr1	32741152	32741153	HDAC1	3065	-16554	CGI	FALSE	TRUE	FALSE
cg11070193	chr1	26527870	26527871	CATSPER4	378807	10750	Non-CGI	FALSE	TRUE	FALSE
cg11142506	chr1	2900163	2900164	ACTRT2	140625	-37881	CGI	FALSE	FALSE	TRUE
cg11200797	chr1	1016470	1016471	RNF223	401934	-6782	CGI-S-Shore	FALSE	FALSE	TRUE
cg11214962	chr1	161280287	161280288	MPZ	4359	-524	CGI-N-Shelf	TRUE	FALSE	FALSE
cg11235921	chr1	917819	917820	C1orf170	84808	-345	CGI	TRUE	FALSE	FALSE
cg11333375	chr1	2316488	2316489	MORN1	79906	6503	CGI	FALSE	TRUE	FALSE
cg11348583	chr1	196746875	196746876	CFHR1	3078	-1415	Non-CGI	TRUE	TRUE	FALSE
cg11376198	chr1	19600730	19600731	AKR7L	246181	-161	CGI	TRUE	FALSE	FALSE
cg11388228	chr1	8410102	8410103	SLC45A1	50651	25711	CGI-N-Shelf	FALSE	FALSE	TRUE
cg11403907	chr1	98569645	98569646	MIR137	406928	-57917	Non-CGI	FALSE	FALSE	TRUE
cg11405475	chr1	203830200	203830201	SNRPE	6635	-525	CGI-N-Shore	TRUE	FALSE	FALSE
cg11406134	chr1	19202951	19202952	MIR4695	100616120	6821	CGI-N-Shore	FALSE	TRUE	FALSE
cg11414913	chr1	2799662	2799663	TTC34	100287898	-93431	CGI	FALSE	FALSE	TRUE
cg11517468	chr1	7023784	7023785	CAMTA1	23261	178399	CGI	FALSE	TRUE	FALSE
cg11582018	chr1	87598069	87598070	LOC339524	339524	139378	CGI	TRUE	TRUE	FALSE
cg11596090	chr1	5779163	5779164	MIR4689	100616421	143636	CGI	FALSE	FALSE	TRUE
cg11665991	chr1	50893469	50893470	DMRTA2	63950	-4349	CGI	FALSE	FALSE	TRUE
cg11681366	chr1	5772385	5772386	MIR4417	100616489	148253	CGI	FALSE	FALSE	TRUE
cg11692307	chr1	2426035	2426036	PLCH2	9651	18280	CGI-S-Shore	FALSE	TRUE	FALSE
cg11702368	chr1	50798572	50798573	DMRTA2	63950	90545	CGI-N-Shore	FALSE	FALSE	TRUE
cg11710123	chr1	3141992	3141993	MIR4251	100422968	97452	CGI	FALSE	TRUE	FALSE
cg11710659	chr1	153762434	153762435	SLC27A3	11000	14665	CGI	FALSE	FALSE	TRUE
cg11717597	chr1	156046546	156046547	MEX3A	92312	5241	CGI	FALSE	TRUE	FALSE
cg11721177	chr1	22919873	22919874	EPHA8	2046	29868	CGI	FALSE	TRUE	FALSE
cg11731300	chr1	161008542	161008543	TSTD1	100131187	230	CGI	FALSE	TRUE	FALSE
cg11732134	chr1	10732912	10732913	CASZ1	54897	123793	CGI	FALSE	TRUE	FALSE
cg11739633	chr1	156459986	156459987	MEF2D	4209	10541	Non-CGI	FALSE	TRUE	FALSE
cg11746651	chr1	3664612	3664613	TP73-AS1	57212	-674	CGI-S-Shore	TRUE	FALSE	FALSE
cg11793699	chr1	156814901	156814902	INSRR	3645	13809	CGI-N-Shore	FALSE	TRUE	FALSE
cg11801727	chr1	228659093	228659094	MIR4666A	100616308	9317	CGI	FALSE	FALSE	TRUE
cg11837181	chr1	3001002	3001003	PRDM16	63976	15259	CGI	FALSE	TRUE	FALSE
cg11853788	chr1	179561347	179561348	TDRD5	163589	598	CGI	FALSE	TRUE	FALSE
cg11953775	chr1	207597011	207597012	CR2	1380	-30632	CGI	FALSE	FALSE	TRUE
cg12037450	chr1	85513124	85513125	MCOLN3	55283	1097	CGI-N-Shore	TRUE	TRUE	FALSE
cg12040210	chr1	5540878	5540879	MIR4417	100616489	-83251	CGI	FALSE	FALSE	TRUE
cg12050271	chr1	2980399	2980400	FLJ42875	440556	-48	CGI	TRUE	FALSE	FALSE
cg12081870	chr1	205475130	205475131	CDK18	5129	1445	CGI-S-Shore	FALSE	TRUE	FALSE
cg12097325	chr1	1076431	1076432	LOC254099	254099	4033	CGI	FALSE	TRUE	FALSE
cg12131894	chr1	2257894	2257895	LOC100129534	100129534	26204	CGI	FALSE	TRUE	FALSE
cg12133451	chr1	227746453	227746454	ZNF678	339500	-4765	CGI	FALSE	FALSE	TRUE
cg12135344	chr1	6188120	6188121	CHD5	26038	52072	CGI	FALSE	TRUE	FALSE
cg12141218	chr1	209799248	209799249	MIR4260	100422894	-2392	Non-CGI	FALSE	TRUE	FALSE
cg12222949	chr1	184005360	184005361	GLT25D2	23127	1516	CGI-N-Shore	FALSE	TRUE	FALSE
cg12274407	chr1	1074226	1074227	LOC254099	254099	1828	CGI-S-Shore	FALSE	TRUE	FALSE
cg12278705	chr1	86045474	86045475	CYR61	3491	-968	CGI-S-Shore	TRUE	FALSE	FALSE
cg12391964	chr1	1986275	1986276	PRKCZ	5590	4365	CGI-S-Shore	FALSE	TRUE	FALSE
cg12403142	chr1	92012408	92012409	CDC7	8317	46003	CGI	FALSE	FALSE	TRUE
cg12406391	chr1	6520194	6520195	TNFRSF25	8718	6059	CGI	FALSE	TRUE	FALSE
cg12407057	chr1	1366206	1366207	VWA1	64856	-4695	CGI-S-Shelf	FALSE	FALSE	TRUE
cg12419176	chr1	32936996	32936997	ZBTB8A	653121	6337	CGI	FALSE	TRUE	FALSE
cg12426196	chr1	161008826	161008827	TSTD1	100131187	-51	CGI	TRUE	FALSE	FALSE
cg12426802	chr1	25175293	25175294	CLIC4	25932	103532	CGI	FALSE	FALSE	TRUE
cg12437277	chr1	228743235	228743236	DUSP5P1	574029	-37157	CGI	FALSE	FALSE	TRUE
cg12468255	chr1	201617056	201617057	NAV1	89796	-392	CGI-N-Shore	TRUE	FALSE	FALSE
cg12468708	chr1	5220736	5220737	MIR4417	100616489	-403393	Non-CGI	FALSE	FALSE	TRUE
cg12473697	chr1	2205770	2205771	SKI	6497	45635	CGI-S-Shore	FALSE	TRUE	FALSE
cg12479878	chr1	221054825	221054826	HLX	3142	2081	CGI	FALSE	TRUE	FALSE
cg12481266	chr1	205561806	205561807	MFSD4	148808	23693	CGI-S-Shore	FALSE	TRUE	FALSE
cg12486498	chr1	230975106	230975107	C1orf198	84886	30227	Non-CGI	FALSE	TRUE	FALSE
cg12623852	chr1	228075452	228075453	WNT9A	7483	60222	CGI	FALSE	FALSE	TRUE
cg12635191	chr1	3111644	3111645	MIR4251	100422968	67104	CGI	FALSE	TRUE	FALSE
cg12663426	chr1	155115785	155115786	DPM3	54344	-2788	CGI-S-Shelf	FALSE	FALSE	TRUE
cg12718519	chr1	2058417	2058418	PRKCZ	5590	76507	CGI	FALSE	TRUE	FALSE
cg12730853	chr1	64935328	64935329	CACHD1	57685	-1146	CGI-N-Shore	TRUE	FALSE	FALSE
cg12749132	chr1	151811364	151811365	LOC100132111	100132111	418	CGI	TRUE	TRUE	FALSE
cg12752420	chr1	43751363	43751364	C1orf210	149466	-74	Non-CGI	TRUE	FALSE	FALSE
cg12754571	chr1	247694271	247694272	GCSAML-AS1	148824	-164	CGI	TRUE	TRUE	FALSE
cg12798157	chr1	19600719	19600720	AKR7L	246181	-150	CGI	TRUE	FALSE	FALSE
cg12800122	chr1	3162454	3162455	MIR4251	100422968	117914	CGI	FALSE	TRUE	FALSE
cg12908607	chr1	44402522	44402523	ARTN	9048	3529	CGI-S-Shore	FALSE	TRUE	FALSE
cg13066703	chr1	211526705	211526706	TRAF5	7188	26747	Non-CGI	FALSE	TRUE	FALSE
cg13092405	chr1	228075423	228075424	WNT9A	7483	60251	CGI	FALSE	FALSE	TRUE
cg13098379	chr1	204839819	204839820	NFASC	23114	42036	Non-CGI	TRUE	TRUE	FALSE
cg13111532	chr1	1886543	1886544	TMEM52	339456	-35802	CGI	FALSE	TRUE	FALSE
cg13175786	chr1	3159615	3159616	MIR4251	100422968	115075	CGI	FALSE	TRUE	FALSE
cg13184177	chr1	27942087	27942088	AHDC1	27245	-11725	CGI	TRUE	TRUE	FALSE
cg13225830	chr1	9527173	9527174	SLC25A33	84275	-72353	Non-CGI	FALSE	FALSE	TRUE
cg13235366	chr1	44032202	44032203	PTPRF	5792	35654	CGI-S-Shore	FALSE	TRUE	FALSE
cg13300273	chr1	200842890	200842891	GPR25	2848	723	CGI	TRUE	FALSE	FALSE
cg13359699	chr1	92950125	92950126	GFI1	2672	2306	CGI	TRUE	TRUE	FALSE
cg13374701	chr1	27190088	27190089	SFN	2810	454	CGI	TRUE	TRUE	FALSE
cg13393580	chr1	1295077	1295078	MXRA8	54587	2078	CGI-N-Shore	TRUE	TRUE	FALSE
cg13420848	chr1	197888894	197888895	LHX9	56956	7258	CGI	FALSE	TRUE	FALSE
cg13426079	chr1	41284948	41284949	KCNQ4	9132	35263	CGI	FALSE	TRUE	FALSE
cg13433694	chr1	43637239	43637240	WDR65	149465	-760	CGI	TRUE	TRUE	FALSE
cg13466383	chr1	161008705	161008706	TSTD1	100131187	67	CGI	TRUE	FALSE	FALSE
cg13498757	chr1	152161927	152161928	RPTN	126638	-30222	CGI	FALSE	FALSE	TRUE
cg13547712	chr1	2850512	2850513	ACTRT2	140625	-87532	CGI	FALSE	FALSE	TRUE
cg13566436	chr1	25240865	25240866	RUNX3	864	50745	CGI-N-Shore	FALSE	TRUE	FALSE
cg13572638	chr1	227173653	227173654	ADCK3	56997	89063	CGI	FALSE	TRUE	FALSE
cg13683667	chr1	9527208	9527209	SLC25A33	84275	-72318	Non-CGI	FALSE	FALSE	TRUE
cg13781744	chr1	43250691	43250692	LOC100129924	100129924	-2968	CGI	FALSE	FALSE	TRUE
cg13863396	chr1	53661346	53661347	CPT2	1376	-753	CGI-N-Shore	TRUE	FALSE	FALSE
cg13867039	chr1	3159645	3159646	MIR4251	100422968	115105	CGI	FALSE	TRUE	FALSE
cg13897675	chr1	1374310	1374311	VWA1	64856	3406	CGI-N-Shore	FALSE	TRUE	FALSE
cg13906823	chr1	161008824	161008825	TSTD1	100131187	-49	CGI	TRUE	FALSE	FALSE
cg13924635	chr1	1168432	1168433	B3GALT6	126792	802	CGI	TRUE	FALSE	FALSE
cg13931996	chr1	4842898	4842899	AJAP1	55966	127792	CGI	FALSE	TRUE	FALSE
cg13935009	chr1	205497713	205497714	CDK18	5129	24028	CGI-N-Shore	FALSE	TRUE	FALSE
cg13936452	chr1	47911336	47911337	FOXD2	2306	9646	CGI	FALSE	FALSE	TRUE
cg13963793	chr1	223567173	223567174	C1orf65	164127	457	CGI	TRUE	FALSE	FALSE
cg13986670	chr1	11708792	11708793	FBXO44	93611	-5638	CGI-N-Shore	FALSE	TRUE	FALSE
cg14011486	chr1	26737247	26737248	LIN28A	79727	-20	CGI-S-Shore	TRUE	FALSE	FALSE
cg14015211	chr1	223315766	223315767	TLR5	7100	856	CGI-N-Shore	FALSE	TRUE	FALSE
cg14027288	chr1	180923683	180923684	KIAA1614	57710	41369	CGI	FALSE	TRUE	FALSE
cg14087168	chr1	156450669	156450670	MEF2D	4209	19858	CGI	FALSE	TRUE	FALSE
cg14089881	chr1	6296630	6296631	ICMT	23463	-585	CGI-S-Shore	TRUE	FALSE	FALSE
cg14166284	chr1	221055719	221055720	HLX	3142	2975	CGI	FALSE	TRUE	FALSE
cg14166948	chr1	1099563	1099564	MIR200B	406984	-2919	CGI	FALSE	FALSE	TRUE
cg14204433	chr1	7844775	7844776	PER3	8863	394	CGI	TRUE	TRUE	FALSE
cg14258143	chr1	32714146	32714147	FAM167B	84734	1327	CGI	FALSE	TRUE	FALSE
cg14264194	chr1	211652549	211652550	RD3	343035	13708	CGI	FALSE	TRUE	FALSE
cg14284055	chr1	24439399	24439400	MYOM3	127294	-733	CGI-S-Shore	TRUE	FALSE	FALSE
cg14373988	chr1	2345333	2345334	PEX10	5192	-1322	CGI-S-Shore	TRUE	FALSE	FALSE
cg14377596	chr1	201709135	201709136	MIR1231	100302158	-68602	CGI	TRUE	TRUE	FALSE
cg14417498	chr1	165322199	165322200	LMX1A	4009	3751	CGI	FALSE	TRUE	FALSE
cg14418633	chr1	2005489	2005490	PRKCZ	5590	23579	CGI	TRUE	TRUE	FALSE
cg14420230	chr1	183204836	183204837	LAMC2	3918	49661	Non-CGI	FALSE	TRUE	FALSE
cg14512089	chr1	160771850	160771851	LY9	4063	5921	CGI	FALSE	TRUE	FALSE
cg14515812	chr1	21978863	21978864	RAP1GAP	5909	16991	CGI	TRUE	TRUE	FALSE
cg14561217	chr1	210425254	210425255	SERTAD4-AS1	574036	-17787	CGI	FALSE	FALSE	TRUE
cg14564939	chr1	24438607	24438608	MYOM3	127294	56	CGI-N-Shore	TRUE	FALSE	FALSE
cg14565725	chr1	119532044	119532045	TBX15	6913	133	CGI	TRUE	FALSE	FALSE
cg14609025	chr1	119550983	119550984	TBX15	6913	-18803	CGI	FALSE	FALSE	TRUE
cg14615266	chr1	35586649	35586650	ZMYM1	79830	41676	CGI	FALSE	FALSE	TRUE
cg14654471	chr1	5937169	5937170	MIR4689	100616421	-14367	CGI-N-Shore	FALSE	TRUE	FALSE
cg14659662	chr1	54151053	54151054	GLIS1	148979	48822	Non-CGI	FALSE	TRUE	FALSE
cg14662355	chr1	165324810	165324811	LMX1A	4009	1140	CGI	TRUE	TRUE	FALSE
cg14663264	chr1	91192798	91192799	BARHL2	343472	-10003	CGI-S-Shore	FALSE	FALSE	TRUE
cg14669515	chr1	9386821	9386822	SPSB1	80176	33879	CGI-S-Shelf	FALSE	TRUE	FALSE
cg14789818	chr1	227748712	227748713	ZNF678	339500	-2506	CGI	FALSE	FALSE	TRUE
cg14836522	chr1	31375133	31375134	SDC3	9672	6345	Non-CGI	FALSE	TRUE	FALSE
cg14839558	chr1	1874488	1874489	TMEM52	339456	-23747	CGI	FALSE	FALSE	TRUE
cg14911892	chr1	1269219	1269220	TAS1R3	83756	2492	CGI-S-Shore	FALSE	TRUE	FALSE
cg14962509	chr1	36039655	36039656	TFAP2E	339488	683	CGI	FALSE	TRUE	FALSE
cg14981532	chr1	17215477	17215478	MIR3675	100500876	-29960	CGI-N-Shore	TRUE	TRUE	FALSE
cg15015892	chr1	151810887	151810888	LOC100132111	100132111	-56	CGI	TRUE	TRUE	FALSE
cg15107724	chr1	36054124	36054125	TFAP2E	339488	15152	CGI-N-Shelf	FALSE	TRUE	FALSE
cg15205428	chr1	6526051	6526052	TNFRSF25	8718	202	CGI-N-Shore	FALSE	TRUE	FALSE
cg15385853	chr1	3304131	3304132	ARHGEF16	27237	-67014	CGI	FALSE	TRUE	FALSE
cg15392919	chr1	2315397	2315398	MORN1	79906	7594	CGI-N-Shore	FALSE	TRUE	FALSE
cg15393025	chr1	244318867	244318868	ZBTB18	10472	104305	CGI	FALSE	FALSE	TRUE
cg15460899	chr1	205039083	205039084	TMEM81	388730	14503	CGI	FALSE	TRUE	FALSE
cg15496956	chr1	47701206	47701207	TAL1	6886	-3313	CGI-S-Shelf	FALSE	TRUE	FALSE
cg15498134	chr1	25246854	25246855	RUNX3	864	44756	Non-CGI	FALSE	TRUE	FALSE
cg15515265	chr1	2828198	2828199	ACTRT2	140625	-109846	CGI	FALSE	FALSE	TRUE
cg15519786	chr1	3266440	3266441	ARHGEF16	27237	-104705	CGI-N-Shelf	FALSE	TRUE	FALSE
cg15521792	chr1	145590148	145590149	NUDT17	200035	-712	CGI-S-Shore	TRUE	FALSE	FALSE
cg15574442	chr1	2437658	2437659	PANK4	55229	20375	CGI-S-Shore	FALSE	FALSE	TRUE
cg15580417	chr1	160053947	160053948	KCNJ9	3765	2586	CGI	FALSE	TRUE	FALSE
cg15597109	chr1	10711695	10711696	CASZ1	54897	145010	CGI	FALSE	TRUE	FALSE
cg15597364	chr1	22919937	22919938	EPHA8	2046	29932	CGI	FALSE	TRUE	FALSE
cg15618533	chr1	228548266	228548267	TRIM11	81559	46249	CGI	FALSE	TRUE	FALSE
cg15622158	chr1	26504019	26504020	CNKSR1	10256	37	Non-CGI	TRUE	FALSE	FALSE
cg15628917	chr1	60539559	60539560	C1orf87	127795	-116	CGI	TRUE	FALSE	FALSE
cg15684702	chr1	45297445	45297446	PTCH2	8643	11169	Non-CGI	TRUE	TRUE	FALSE
cg15691862	chr1	47905438	47905439	FOXD2	2306	3748	CGI	TRUE	FALSE	FALSE
cg15713103	chr1	933685	933686	HES4	57801	1865	CGI	FALSE	FALSE	TRUE
cg15730491	chr1	221068834	221068835	HLX	3142	16090	CGI	FALSE	FALSE	TRUE
cg15731035	chr1	6106539	6106540	NPHP4	261734	-54005	CGI	FALSE	TRUE	FALSE
cg15821544	chr1	43473840	43473841	SLC2A1	6513	-48992	CGI	FALSE	FALSE	TRUE
cg15824094	chr1	2429005	2429006	PLCH2	9651	21250	CGI-S-Shore	TRUE	TRUE	FALSE
cg15829056	chr1	54856415	54856416	SSBP3	23648	15675	CGI	FALSE	TRUE	FALSE
cg15829088	chr1	247802935	247802936	OR13G1	441933	33406	CGI	FALSE	FALSE	TRUE
cg15979173	chr1	91182128	91182129	BARHL2	343472	664	CGI	TRUE	FALSE	FALSE
cg16009734	chr1	65774867	65774868	DNAJC6	9829	54718	CGI	TRUE	TRUE	FALSE
cg16104263	chr1	3394709	3394710	ARHGEF16	27237	23561	CGI	FALSE	TRUE	FALSE
cg16110541	chr1	68679600	68679601	WLS	79971	18682	Non-CGI	FALSE	TRUE	FALSE
cg16137147	chr1	221067896	221067897	HLX	3142	15152	CGI	FALSE	FALSE	TRUE
cg16138910	chr1	11562134	11562135	PTCHD2	57540	22838	CGI-S-Shore	TRUE	TRUE	FALSE
cg16247183	chr1	225865110	225865111	ENAH	55740	-24264	CGI	FALSE	FALSE	TRUE
cg16254190	chr1	16483694	16483695	EPHA2	1969	-1111	CGI-S-Shore	TRUE	FALSE	FALSE
cg16277776	chr1	1490676	1490677	TMEM240	339453	-14935	CGI-S-Shore	FALSE	TRUE	FALSE
cg16298867	chr1	2833643	2833644	ACTRT2	140625	-104401	CGI-N-Shore	FALSE	FALSE	TRUE
cg16306900	chr1	182026435	182026436	ZNF648	127665	4410	CGI	TRUE	TRUE	FALSE
cg16312002	chr1	16554558	16554559	RSG1	79363	9099	CGI	FALSE	FALSE	TRUE
cg16355231	chr1	2344979	2344980	PEX10	5192	-968	CGI-S-Shore	TRUE	FALSE	FALSE
cg16366262	chr1	1118157	1118158	TTLL10	254173	8870	CGI	FALSE	TRUE	FALSE
cg16400631	chr1	91300215	91300216	BARHL2	343472	-117420	CGI	FALSE	TRUE	FALSE
cg16402893	chr1	155226099	155226100	FAM189B	10712	-824	CGI-S-Shore	TRUE	TRUE	FALSE
cg16410524	chr1	167604788	167604789	RCSD1	92241	5313	Non-CGI	FALSE	TRUE	FALSE
cg16430402	chr1	5947386	5947387	MIR4689	100616421	-24584	CGI	FALSE	TRUE	FALSE
cg16512390	chr1	228756714	228756715	DUSP5P1	574029	-23678	CGI	FALSE	FALSE	TRUE
cg16532282	chr1	226271799	226271800	H3F3AP4	440926	20120	CGI	FALSE	TRUE	FALSE
cg16600733	chr1	2266362	2266363	LOC100129534	100129534	17736	CGI	FALSE	TRUE	FALSE
cg16653138	chr1	2005180	2005181	PRKCZ	5590	23270	CGI	TRUE	TRUE	FALSE
cg16676676	chr1	228558987	228558988	TRIM11	81559	35528	CGI	FALSE	TRUE	FALSE
cg16679832	chr1	4008081	4008082	LOC728716	728716	7408	Non-CGI	FALSE	TRUE	FALSE
cg16716189	chr1	113261711	113261712	FAM19A3	284467	-1476	CGI	TRUE	FALSE	FALSE
cg16731157	chr1	24830054	24830055	RCAN3AS	100750325	-1203	CGI-S-Shore	TRUE	TRUE	FALSE
cg16814416	chr1	45272261	45272262	TCTEX1D4	343521	694	CGI-S-Shore	TRUE	TRUE	FALSE
cg16817668	chr1	32055006	32055007	TINAGL1	64129	12919	CGI-S-Shore	FALSE	FALSE	TRUE
cg16836311	chr1	25944712	25944713	MAN1C1	57134	752	CGI	TRUE	FALSE	FALSE
cg16897608	chr1	54159698	54159699	GLIS1	148979	40177	Non-CGI	FALSE	TRUE	FALSE
cg16926213	chr1	1841314	1841315	CALML6	163688	-4950	CGI-S-Shore	FALSE	FALSE	TRUE
cg16964673	chr1	3775206	3775207	DFFB	1677	1360	CGI	TRUE	TRUE	FALSE
cg16993043	chr1	200008026	200008027	NR5A2	2494	11255	CGI	TRUE	TRUE	FALSE
cg17006413	chr1	942451	942452	ISG15	9636	-6394	CGI	FALSE	FALSE	TRUE
cg17012160	chr1	240255691	240255692	FMN2	56776	505	CGI	TRUE	FALSE	FALSE
cg17025688	chr1	2107410	2107411	C1orf86	199990	31760	CGI	FALSE	TRUE	FALSE
cg17077180	chr1	38461687	38461688	SF3A3	10946	-5925	CGI	FALSE	FALSE	TRUE
cg17091049	chr1	1860127	1860128	TMEM52	339456	-9386	CGI-S-Shore	TRUE	FALSE	FALSE
cg17094363	chr1	1065864	1065865	LOC254099	254099	-6531	CGI-S-Shore	FALSE	FALSE	TRUE
cg17130982	chr1	1946008	1946009	GABRD	2563	-4758	CGI-N-Shore	FALSE	TRUE	FALSE
cg17147211	chr1	119544070	119544071	TBX15	6913	-11890	CGI	FALSE	FALSE	TRUE
cg17158913	chr1	10764886	10764887	CASZ1	54897	91819	CGI	FALSE	TRUE	FALSE
cg17165158	chr1	2182612	2182613	SKI	6497	22477	CGI	FALSE	TRUE	FALSE
cg17167852	chr1	55505189	55505190	PCSK9	255738	39	CGI	TRUE	FALSE	FALSE
cg17167920	chr1	154127537	154127538	NUP210L	91181	53	CGI	TRUE	FALSE	FALSE
cg17178900	chr1	205818956	205818957	PM20D1	148811	318	CGI	FALSE	TRUE	FALSE
cg17201124	chr1	1976627	1976628	PRKCZ	5590	-5280	CGI	FALSE	FALSE	TRUE
cg17210938	chr1	59043173	59043174	TACSTD2	4070	-6	CGI	TRUE	FALSE	FALSE
cg17222685	chr1	212820194	212820195	FAM71A	149647	22404	CGI	FALSE	FALSE	TRUE
cg17243628	chr1	9131783	9131784	SLC2A5	6518	16725	CGI	TRUE	TRUE	FALSE
cg17326555	chr1	119535693	119535694	TBX15	6913	-3513	CGI-S-Shore	FALSE	FALSE	TRUE
cg17329287	chr1	44870688	44870689	RNF220	55182	-270	CGI-N-Shore	TRUE	FALSE	FALSE
cg17330303	chr1	27189648	27189649	SFN	2810	14	CGI-N-Shore	TRUE	TRUE	FALSE
cg17443359	chr1	91300231	91300232	BARHL2	343472	-117436	CGI	FALSE	TRUE	FALSE
cg17449954	chr1	40105667	40105668	HEYL	26508	-318	CGI	TRUE	FALSE	FALSE
cg17455155	chr1	3056679	3056680	MIR4251	100422968	12139	CGI	FALSE	TRUE	FALSE
cg17456100	chr1	22140859	22140860	LDLRAD2	401944	2100	CGI	FALSE	TRUE	FALSE
cg17463633	chr1	238024463	238024464	LOC100130331	100130331	-1010	CGI-N-Shelf	TRUE	FALSE	FALSE
cg17471939	chr1	3600879	3600880	TP73	7161	31749	CGI	FALSE	TRUE	FALSE
cg17474650	chr1	52060542	52060543	OSBPL9	114883	17690	Non-CGI	FALSE	TRUE	FALSE
cg17479280	chr1	156466088	156466089	MEF2D	4209	4439	CGI-N-Shelf	FALSE	TRUE	FALSE
cg17479716	chr1	18276155	18276156	IGSF21	84966	-158083	Non-CGI	FALSE	FALSE	TRUE
cg17486066	chr1	34330045	34330046	HMGB4	127540	3968	Non-CGI	TRUE	TRUE	FALSE
cg17496659	chr1	3568245	3568246	TP73	7161	-882	CGI	TRUE	FALSE	FALSE
cg17503596	chr1	203764137	203764138	ZC3H11A	9877	-612	CGI-N-Shore	TRUE	FALSE	FALSE
cg17508302	chr1	161575716	161575717	HSPA7	3311	-131	CGI	TRUE	FALSE	FALSE
cg17519449	chr1	32205031	32205032	MIR4254	100423028	19303	CGI-N-Shelf	FALSE	TRUE	FALSE
cg17602126	chr1	40105687	40105688	HEYL	26508	-338	CGI-S-Shore	TRUE	FALSE	FALSE
cg17737409	chr1	230250010	230250011	GALNT2	2590	56473	CGI	FALSE	TRUE	FALSE
cg17739555	chr1	48059354	48059355	FOXD2	2306	157664	CGI-S-Shore	FALSE	FALSE	TRUE
cg17757848	chr1	166958583	166958584	MAEL	84944	13763	CGI	TRUE	TRUE	FALSE
cg17786206	chr1	29142254	29142255	OPRD1	4985	3599	CGI-S-Shelf	FALSE	TRUE	FALSE
cg17804348	chr1	3649473	3649474	TP73-AS1	57212	14462	CGI	FALSE	TRUE	FALSE
cg17808634	chr1	4275141	4275142	LOC284661	284661	-196968	Non-CGI	FALSE	FALSE	TRUE
cg17820022	chr1	2425860	2425861	PLCH2	9651	18105	CGI-S-Shore	FALSE	TRUE	FALSE
cg17820306	chr1	156339286	156339287	RHBG	57127	282	CGI-S-Shore	FALSE	TRUE	FALSE
cg17822947	chr1	207842917	207842918	CR1L	1379	24458	CGI	FALSE	TRUE	FALSE
cg17824277	chr1	13838127	13838128	LRRC38	126755	2113	CGI-N-Shore	FALSE	TRUE	FALSE
cg17826530	chr1	59280290	59280291	LOC100131060	100131060	29466	CGI	FALSE	TRUE	FALSE
cg17827328	chr1	36817299	36817300	EVA1B	55194	-27543	Non-CGI	FALSE	TRUE	FALSE
cg17833169	chr1	67600547	67600548	C1orf141	400757	104	CGI	FALSE	TRUE	FALSE
cg17841765	chr1	22560699	22560700	WNT4	54361	-90313	Non-CGI	FALSE	FALSE	TRUE
cg17848003	chr1	3704513	3704514	LRRC47	57470	8553	CGI	FALSE	TRUE	FALSE
cg17862152	chr1	203044930	203044931	MYOG	4656	10445	CGI	FALSE	TRUE	FALSE
cg17873612	chr1	23279531	23279532	LOC729059	729059	62810	CGI-N-Shore	FALSE	FALSE	TRUE
cg17927613	chr1	6187633	6187634	CHD5	26038	52559	CGI-N-Shore	FALSE	TRUE	FALSE
cg17928286	chr1	205414220	205414221	MIR135B	442891	3304	Non-CGI	FALSE	FALSE	TRUE
cg17941572	chr1	63784454	63784455	LINC00466	199899	-1552	CGI	TRUE	FALSE	FALSE
cg17966560	chr1	156357871	156357872	RHBG	57127	18867	CGI-N-Shore	FALSE	FALSE	TRUE
cg17974166	chr1	23280069	23280070	LOC729059	729059	62272	CGI	FALSE	FALSE	TRUE
cg18024358	chr1	3420815	3420816	ARHGEF16	27237	49667	CGI-S-Shelf	FALSE	TRUE	FALSE
cg18107144	chr1	32042157	32042158	TINAGL1	64129	70	Non-CGI	TRUE	FALSE	FALSE
cg18128887	chr1	24861708	24861709	NCMAP	400746	-20857	CGI-N-Shore	FALSE	TRUE	FALSE
cg18143535	chr1	95285405	95285406	SLC44A3	126969	-494	CGI	TRUE	TRUE	FALSE
cg18146737	chr1	92946700	92946701	GFI1	2672	5731	CGI	FALSE	TRUE	FALSE
cg18172051	chr1	29189940	29189941	EPB41	2035	-23661	CGI	FALSE	TRUE	FALSE
cg18181229	chr1	164545699	164545700	PBX1	5087	17101	CGI	FALSE	TRUE	FALSE
cg18202521	chr1	19600702	19600703	AKR7L	246181	-133	CGI	TRUE	FALSE	FALSE
cg18273417	chr1	153518418	153518419	S100A4	6275	-135	Non-CGI	TRUE	TRUE	FALSE
cg18279134	chr1	16394568	16394569	FAM131C	348487	5557	Non-CGI	FALSE	TRUE	FALSE
cg18318878	chr1	214159037	214159038	PROX1	5629	-2247	CGI	FALSE	FALSE	TRUE
cg18322510	chr1	236686618	236686619	LGALS8-AS1	100287902	1188	CGI-N-Shore	TRUE	TRUE	FALSE
cg18328206	chr1	206681378	206681379	RASSF5	83593	498	CGI	TRUE	FALSE	FALSE
cg18381051	chr1	2987645	2987646	PRDM16	63976	1902	CGI	FALSE	TRUE	FALSE
cg18388270	chr1	149212246	149212247	LOC388692	388692	-67228	CGI	TRUE	FALSE	FALSE
cg18397998	chr1	2125243	2125244	C1orf86	199990	13927	CGI	FALSE	TRUE	FALSE
cg18533397	chr1	110186005	110186006	GSTM2	2946	-12691	CGI-N-Shore	FALSE	FALSE	TRUE
cg18533966	chr1	19336603	19336604	IFFO2	126917	-53776	Non-CGI	FALSE	FALSE	TRUE
cg18537476	chr1	229252112	229252113	RAB4A	5867	-154765	Non-CGI	FALSE	FALSE	TRUE
cg18644793	chr1	2896778	2896779	ACTRT2	140625	-41266	CGI-N-Shelf	FALSE	FALSE	TRUE
cg18770052	chr1	5661886	5661887	MIR4417	100616489	37754	CGI	FALSE	TRUE	FALSE
cg18770446	chr1	1109983	1109984	TTLL10	254173	696	CGI	FALSE	TRUE	FALSE
cg18788664	chr1	221068171	221068172	HLX	3142	15427	CGI	FALSE	FALSE	TRUE
cg18792022	chr1	11709271	11709272	FBXO44	93611	-5159	CGI	FALSE	TRUE	FALSE
cg18859033	chr1	153581793	153581794	S100A16	140576	3719	Non-CGI	TRUE	TRUE	FALSE
cg18862597	chr1	17265457	17265458	MFAP2	4237	42622	CGI-N-Shore	TRUE	TRUE	FALSE
cg18890544	chr1	242220538	242220539	MAP1LC3C	440738	-58152	CGI	FALSE	FALSE	TRUE
cg18964375	chr1	33772147	33772148	MIR3605	100500853	25944	CGI-N-Shore	FALSE	FALSE	TRUE
cg19025786	chr1	2206662	2206663	SKI	6497	46527	CGI-S-Shore	FALSE	TRUE	FALSE
cg19081571	chr1	1190137	1190138	FAM132A	388581	-8034	CGI	FALSE	TRUE	FALSE
cg19163067	chr1	36042438	36042439	TFAP2E	339488	3466	CGI	FALSE	TRUE	FALSE
cg19259649	chr1	145571288	145571289	PIAS3	10401	-4000	CGI-N-Shelf	FALSE	FALSE	TRUE
cg19318393	chr1	223936508	223936509	CAPN2	824	47212	CGI	FALSE	TRUE	FALSE
cg19375537	chr1	46951589	46951590	DMBX1	127343	-21077	CGI	FALSE	FALSE	TRUE
cg19590532	chr1	25255920	25255921	RUNX3	864	35690	CGI	FALSE	TRUE	FALSE
cg19675142	chr1	116107015	116107016	VANGL1	81839	-77557	CGI	FALSE	FALSE	TRUE
cg19697382	chr1	7711079	7711080	VAMP3	9341	-120248	Non-CGI	FALSE	TRUE	FALSE
cg19757631	chr1	11118889	11118890	SRM	6723	1200	CGI	FALSE	TRUE	FALSE
cg19764599	chr1	75601276	75601277	LHX8	431707	7156	CGI	FALSE	TRUE	FALSE
cg19774846	chr1	25292225	25292226	RUNX3	864	-612	CGI-S-Shore	TRUE	FALSE	FALSE
cg19802390	chr1	2840177	2840178	ACTRT2	140625	-97867	CGI	FALSE	FALSE	TRUE
cg19810598	chr1	50892674	50892675	DMRTA2	63950	-3554	CGI	FALSE	FALSE	TRUE
cg19811087	chr1	91184501	91184502	BARHL2	343472	-1706	CGI	TRUE	FALSE	FALSE
cg19812400	chr1	203455997	203455998	OPTC	26254	-7272	CGI	FALSE	TRUE	FALSE
cg19820919	chr1	9380800	9380801	SPSB1	80176	27858	CGI	FALSE	TRUE	FALSE
cg19827875	chr1	201618284	201618285	NAV1	89796	833	CGI	TRUE	FALSE	FALSE
cg19856705	chr1	234667500	234667501	LOC100506795	100506795	23	CGI	TRUE	FALSE	FALSE
cg19866866	chr1	182026044	182026045	ZNF648	127665	4801	CGI	TRUE	TRUE	FALSE
cg19899395	chr1	46959349	46959350	DMBX1	127343	-13317	CGI-S-Shore	FALSE	FALSE	TRUE
cg19924619	chr1	165323692	165323693	LMX1A	4009	2258	CGI	FALSE	TRUE	FALSE
cg19928739	chr1	2089555	2089556	C1orf86	199990	49615	CGI	FALSE	TRUE	FALSE
cg19940077	chr1	200842282	200842283	GPR25	2848	115	CGI	TRUE	FALSE	FALSE
cg19999567	chr1	1022900	1022901	RNF223	401934	-13212	CGI	FALSE	TRUE	FALSE
cg20011075	chr1	4008090	4008091	LOC728716	728716	7417	Non-CGI	FALSE	TRUE	FALSE
cg20011248	chr1	227747268	227747269	ZNF678	339500	-3950	CGI	FALSE	FALSE	TRUE
cg20016673	chr1	108023366	108023367	NTNG1	22854	340736	CGI	FALSE	TRUE	FALSE
cg20141398	chr1	2928616	2928617	ACTRT2	140625	-9428	CGI	FALSE	FALSE	TRUE
cg20146541	chr1	248020697	248020698	TRIM58	25893	195	CGI	TRUE	FALSE	FALSE
cg20163085	chr1	10510396	10510397	CORT	1325	619	Non-CGI	FALSE	TRUE	FALSE
cg20263885	chr1	24882207	24882208	NCMAP	400746	-358	CGI	TRUE	FALSE	FALSE
cg20264068	chr1	207842927	207842928	CR1L	1379	24468	CGI	FALSE	TRUE	FALSE
cg20267580	chr1	85220130	85220131	SSX2IP	117178	-63689	CGI	FALSE	FALSE	TRUE
cg20274267	chr1	12164477	12164478	TNFRSF8	943	41042	Non-CGI	TRUE	TRUE	FALSE
cg20282303	chr1	236924392	236924393	MTR	4548	-34187	CGI	FALSE	TRUE	FALSE
cg20286956	chr1	39547918	39547919	MACF1	23499	828	CGI	TRUE	TRUE	FALSE
cg20293609	chr1	86048540	86048541	CYR61	3491	2095	CGI	TRUE	TRUE	FALSE
cg20298273	chr1	156897330	156897331	LRRC71	149499	6905	CGI	FALSE	TRUE	FALSE
cg20329210	chr1	228566080	228566081	TRIM11	81559	28435	CGI	FALSE	TRUE	FALSE
cg20434152	chr1	7120926	7120927	CAMTA1	23261	275541	CGI	FALSE	TRUE	FALSE
cg20462242	chr1	3227744	3227745	ARHGEF16	27237	-143401	CGI-N-Shore	FALSE	TRUE	FALSE
cg20462561	chr1	228890820	228890821	DUSP5P1	574029	110425	CGI	FALSE	FALSE	TRUE
cg20489026	chr1	160053931	160053932	KCNJ9	3765	2570	CGI	FALSE	TRUE	FALSE
cg20491991	chr1	167683013	167683014	MPZL1	9019	-8172	CGI	TRUE	FALSE	FALSE
cg20593826	chr1	59280370	59280371	LOC100131060	100131060	29546	CGI	FALSE	TRUE	FALSE
cg20608783	chr1	32220189	32220190	MIR4254	100423028	4145	CGI-N-Shore	FALSE	TRUE	FALSE
cg20611680	chr1	16554171	16554172	RSG1	79363	9486	CGI	FALSE	FALSE	TRUE
cg20613432	chr1	2799579	2799580	TTC34	100287898	-93348	CGI	FALSE	FALSE	TRUE
cg20615827	chr1	9515447	9515448	SLC25A33	84275	-84079	Non-CGI	FALSE	FALSE	TRUE
cg20686277	chr1	20238347	20238348	PLA2G2E	30814	11761	Non-CGI	FALSE	TRUE	FALSE
cg20699586	chr1	227748719	227748720	ZNF678	339500	-2499	CGI	FALSE	FALSE	TRUE
cg20704560	chr1	10698313	10698314	CASZ1	54897	158392	CGI-N-Shore	FALSE	TRUE	FALSE
cg20772512	chr1	38022359	38022360	DNALI1	7802	-159	CGI-N-Shore	TRUE	FALSE	FALSE
cg20801718	chr1	25255314	25255315	RUNX3	864	36296	CGI	FALSE	TRUE	FALSE
cg20803293	chr1	110254709	110254710	GSTM5	2949	-153	CGI	TRUE	FALSE	FALSE
cg20821842	chr1	231155945	231155946	MIR1182	100302132	-274	CGI	TRUE	TRUE	FALSE
cg20822337	chr1	161950791	161950792	OLFML2B	25903	42851	CGI-S-Shelf	FALSE	FALSE	TRUE
cg20826162	chr1	3511710	3511711	MEGF6	1953	16347	CGI-N-Shore	FALSE	TRUE	FALSE
cg20978923	chr1	12184574	12184575	TNFRSF1B	7133	-42484	CGI-N-Shelf	TRUE	TRUE	FALSE
cg20996124	chr1	1144203	1144204	TNFRSF18	8784	-2113	CGI	FALSE	FALSE	TRUE
cg21005416	chr1	21606617	21606618	LOC100506801	100506801	-13164	Non-CGI	TRUE	TRUE	FALSE
cg21140898	chr1	51442318	51442319	CDKN2C	1031	8709	CGI	FALSE	FALSE	TRUE
cg21155609	chr1	32713275	32713276	FAM167B	84734	456	CGI-N-Shore	TRUE	FALSE	FALSE
cg21156590	chr1	3420848	3420849	ARHGEF16	27237	49700	CGI-S-Shelf	FALSE	TRUE	FALSE
cg21160472	chr1	212782112	212782113	FAM71A	149647	-15675	CGI	TRUE	TRUE	FALSE
cg21211271	chr1	6265071	6265072	RNF207	388591	-1116	CGI	TRUE	FALSE	FALSE
cg21220721	chr1	6341230	6341231	GPR153	387509	-20194	CGI	FALSE	TRUE	FALSE
cg21297493	chr1	156357905	156357906	RHBG	57127	18901	CGI-N-Shore	FALSE	FALSE	TRUE
cg21303655	chr1	112438797	112438798	KCND3	3752	92978	CGI	FALSE	TRUE	FALSE
cg21470600	chr1	6040824	6040825	KCNAB2	8514	-11532	CGI-S-Shelf	FALSE	TRUE	FALSE
cg21535942	chr1	75199100	75199101	CRYZ	1429	-7	CGI	TRUE	FALSE	FALSE
cg21609640	chr1	166890380	166890381	TADA1	117143	-44725	CGI	FALSE	TRUE	FALSE
cg21679391	chr1	1286917	1286918	DVL1	1855	-2424	CGI	FALSE	FALSE	TRUE
cg21682432	chr1	3207419	3207420	MIR4251	100422968	162879	CGI	FALSE	TRUE	FALSE
cg21692450	chr1	46940325	46940326	DMBX1	127343	-32341	Non-CGI	FALSE	FALSE	TRUE
cg21786289	chr1	854966	854967	LOC100130417	100130417	-148	CGI-N-Shore	TRUE	FALSE	FALSE
cg21816308	chr1	39044140	39044141	MYCBP	26292	294908	CGI	FALSE	FALSE	TRUE
cg21854759	chr1	92012499	92012500	CDC7	8317	46094	CGI	FALSE	FALSE	TRUE
cg21859019	chr1	24882153	24882154	NCMAP	400746	-412	CGI-N-Shore	TRUE	FALSE	FALSE
cg21862126	chr1	1076296	1076297	LOC254099	254099	3898	CGI	TRUE	TRUE	FALSE
cg21863110	chr1	116380417	116380418	NHLH2	4808	3328	CGI	FALSE	TRUE	FALSE
cg21914290	chr1	170635960	170635961	PRRX1	5396	2646	CGI	FALSE	TRUE	FALSE
cg21936179	chr1	206786180	206786181	EIF2D	1939	-275	CGI-S-Shore	TRUE	FALSE	FALSE
cg21942218	chr1	7723420	7723421	VAMP3	9341	-107907	CGI	FALSE	TRUE	FALSE
cg21959334	chr1	228579038	228579039	TRIM11	81559	15477	CGI-N-Shelf	FALSE	FALSE	TRUE
cg22016671	chr1	4221401	4221402	LOC728716	728716	220728	CGI	FALSE	FALSE	TRUE
cg22039909	chr1	3635100	3635101	TP73-AS1	57212	28835	CGI-S-Shore	FALSE	TRUE	FALSE
cg22047469	chr1	1110107	1110108	TTLL10	254173	820	CGI	FALSE	TRUE	FALSE
cg22123915	chr1	86047807	86047808	CYR61	3491	1362	CGI	TRUE	TRUE	FALSE
cg22153463	chr1	85462885	85462886	MCOLN2	255231	-88	CGI	TRUE	FALSE	FALSE
cg22225207	chr1	13840712	13840713	LRRC38	126755	-469	CGI-S-Shore	TRUE	FALSE	FALSE
cg22226438	chr1	854766	854767	LOC100130417	100130417	49	CGI-N-Shore	TRUE	FALSE	FALSE
cg22337407	chr1	11046185	11046186	C1orf127	148345	-4090	Non-CGI	FALSE	FALSE	TRUE
cg22343877	chr1	175856781	175856782	SCARNA3	677679	80893	CGI	FALSE	FALSE	TRUE
cg22354782	chr1	115881132	115881133	NGF	4803	-274	CGI	TRUE	FALSE	FALSE
cg22372182	chr1	223566669	223566670	C1orf65	164127	-44	CGI-N-Shore	TRUE	FALSE	FALSE
cg22433862	chr1	28013341	28013342	IFI6	2537	-14616	Non-CGI	FALSE	FALSE	TRUE
cg22481448	chr1	27480668	27480669	SLC9A1	6548	781	CGI	TRUE	FALSE	FALSE
cg22483742	chr1	228286482	228286483	MIR3620	100500810	1517	CGI	FALSE	TRUE	FALSE
cg22495848	chr1	2425173	2425174	PLCH2	9651	17418	CGI	FALSE	TRUE	FALSE
cg22507154	chr1	91185233	91185234	BARHL2	343472	-2438	CGI	FALSE	FALSE	TRUE
cg22508928	chr1	10710134	10710135	CASZ1	54897	146571	CGI	FALSE	TRUE	FALSE
cg22514764	chr1	243637838	243637839	MIR4677	100616343	128359	CGI	FALSE	TRUE	FALSE
cg22604316	chr1	46958801	46958802	DMBX1	127343	-13865	CGI	FALSE	FALSE	TRUE
cg22679890	chr1	244319093	244319094	ZBTB18	10472	104531	CGI	FALSE	FALSE	TRUE
cg22692549	chr1	149145243	149145244	LOC388692	388692	-134231	CGI	FALSE	FALSE	TRUE
cg22694818	chr1	75595970	75595971	LHX8	431707	1850	CGI	TRUE	TRUE	FALSE
cg22698272	chr1	221054615	221054616	HLX	3142	1871	CGI	FALSE	TRUE	FALSE
cg22699361	chr1	854918	854919	LOC100130417	100130417	-100	CGI-N-Shore	TRUE	FALSE	FALSE
cg22711792	chr1	50883329	50883330	DMRTA2	63950	5788	CGI	FALSE	TRUE	FALSE
cg22714290	chr1	207992548	207992549	LOC148696	148696	823	CGI-S-Shore	TRUE	TRUE	FALSE
cg22721579	chr1	36787932	36787933	EVA1B	55194	1821	CGI	FALSE	TRUE	FALSE
cg22730047	chr1	161410551	161410552	FCGR2A	2212	-64652	CGI	TRUE	FALSE	FALSE
cg22789254	chr1	36550824	36550825	TEKT2	27285	1147	CGI-S-Shore	TRUE	TRUE	FALSE
cg22790377	chr1	228291668	228291669	C1orf35	79169	-645	CGI-S-Shore	TRUE	FALSE	FALSE
cg22796363	chr1	214477063	214477064	SMYD2	56950	22497	CGI-N-Shore	FALSE	TRUE	FALSE
cg22797514	chr1	44016023	44016024	PTPRF	5792	19475	Non-CGI	FALSE	TRUE	FALSE
cg22812770	chr1	52195547	52195548	MIR761	100313892	106525	CGI	TRUE	TRUE	FALSE
cg22853713	chr1	10732872	10732873	CASZ1	54897	123833	CGI	FALSE	TRUE	FALSE
cg22871908	chr1	111323421	111323422	CD53	963	-90398	CGI	FALSE	FALSE	TRUE
cg22942532	chr1	2089924	2089925	C1orf86	199990	49246	CGI-S-Shore	FALSE	TRUE	FALSE
cg23022656	chr1	42628585	42628586	GUCA2A	2980	1808	Non-CGI	FALSE	TRUE	FALSE
cg23025459	chr1	3134420	3134421	MIR4251	100422968	89880	CGI	FALSE	TRUE	FALSE
cg23037132	chr1	40105664	40105665	HEYL	26508	-315	CGI	TRUE	FALSE	FALSE
cg23068939	chr1	112016586	112016587	C1orf162	128346	-16	Non-CGI	TRUE	FALSE	FALSE
cg23072161	chr1	16489115	16489116	EPHA2	1969	-6532	CGI	FALSE	FALSE	TRUE
cg23087876	chr1	237947246	237947247	LOC100130331	100130331	-78227	CGI	FALSE	TRUE	FALSE
cg23089825	chr1	170630558	170630559	PRRX1	5396	-2753	CGI	FALSE	FALSE	TRUE
cg23109867	chr1	41304105	41304106	CITED4	163732	23911	CGI	FALSE	TRUE	FALSE
cg23173402	chr1	227635558	227635559	ZNF678	339500	-115660	CGI	FALSE	FALSE	TRUE
cg23218354	chr1	2885244	2885245	ACTRT2	140625	-52800	CGI	FALSE	FALSE	TRUE
cg23226914	chr1	247537224	247537225	ZNF496	84838	-42178	CGI	FALSE	FALSE	TRUE
cg23231666	chr1	10699975	10699976	CASZ1	54897	156730	CGI	FALSE	TRUE	FALSE
cg23237611	chr1	76262857	76262858	MSH4	4438	300	CGI	TRUE	FALSE	FALSE
cg23237976	chr1	236318493	236318494	GPR137B	7107	12660	Non-CGI	FALSE	TRUE	FALSE
cg23281527	chr1	18809531	18809532	KLHDC7A	127707	2106	CGI	TRUE	FALSE	FALSE
cg23590827	chr1	92683514	92683515	C1orf146	388649	-57	CGI	TRUE	FALSE	FALSE
cg23599716	chr1	44686794	44686795	DMAP1	55929	7668	Non-CGI	FALSE	TRUE	FALSE
cg23610373	chr1	149298587	149298588	LOC388692	388692	19110	CGI-S-Shore	TRUE	FALSE	FALSE
cg23626733	chr1	2345398	2345399	PEX10	5192	-1387	CGI-S-Shore	TRUE	FALSE	FALSE
cg23629166	chr1	2345368	2345369	PEX10	5192	-1357	CGI-S-Shore	TRUE	FALSE	FALSE
cg23635910	chr1	912055	912056	C1orf170	84808	5416	CGI	TRUE	TRUE	FALSE
cg23639308	chr1	159899714	159899715	TAGLN2	8407	-4429	CGI	TRUE	TRUE	FALSE
cg23651812	chr1	1104366	1104367	MIR429	554210	-17	CGI-S-Shore	TRUE	FALSE	FALSE
cg23844904	chr1	31319512	31319513	SDC3	9672	61966	Non-CGI	FALSE	FALSE	TRUE
cg23894854	chr1	112016615	112016616	C1orf162	128346	10	Non-CGI	TRUE	FALSE	FALSE
cg23930133	chr1	4231220	4231221	LOC728716	728716	230547	Non-CGI	FALSE	FALSE	TRUE
cg23969554	chr1	2979311	2979312	FLJ42875	440556	1037	CGI	TRUE	FALSE	FALSE
cg24033491	chr1	181382830	181382831	CACNA1E	777	-69854	CGI	FALSE	FALSE	TRUE
cg24035898	chr1	159825595	159825596	C1orf204	284677	-457	CGI	TRUE	TRUE	FALSE
cg24051554	chr1	151811620	151811621	LOC100132111	100132111	674	CGI	TRUE	TRUE	FALSE
cg24080008	chr1	38600199	38600200	MIR3659	100500801	45295	CGI	FALSE	FALSE	TRUE
cg24107728	chr1	53760337	53760338	LRP8	7804	33482	Non-CGI	FALSE	TRUE	FALSE
cg24150662	chr1	2949673	2949674	ACTRT2	140625	11626	CGI-S-Shore	FALSE	FALSE	TRUE
cg24161057	chr1	161008811	161008812	TSTD1	100131187	-36	CGI	TRUE	FALSE	FALSE
cg24250374	chr1	184591081	184591082	EDEM3	80267	132958	Non-CGI	FALSE	TRUE	FALSE
cg24315049	chr1	1871963	1871964	TMEM52	339456	-21222	CGI	FALSE	FALSE	TRUE
cg24346905	chr1	108023249	108023250	NTNG1	22854	340619	CGI	FALSE	TRUE	FALSE
cg24368383	chr1	1565856	1565857	MMP23B	8510	-1702	CGI	TRUE	TRUE	FALSE
cg24371534	chr1	3384929	3384930	ARHGEF16	27237	13781	Non-CGI	FALSE	TRUE	FALSE
cg24393673	chr1	102312610	102312611	DNAJA1P5	94236	-24955	Non-CGI	TRUE	TRUE	FALSE
cg24400630	chr1	89728035	89728036	GBP5	115362	10507	Non-CGI	FALSE	TRUE	FALSE
cg24405951	chr1	19337477	19337478	IFFO2	126917	-54650	Non-CGI	FALSE	FALSE	TRUE
cg24411961	chr1	34642396	34642397	C1orf94	84970	9771	CGI	TRUE	TRUE	FALSE
cg24426733	chr1	33938904	33938905	ZSCAN20	7579	671	CGI-S-Shore	FALSE	TRUE	FALSE
cg24427376	chr1	78354053	78354054	NEXN	91624	-145	CGI-N-Shore	TRUE	FALSE	FALSE
cg24429974	chr1	161195180	161195181	TOMM40L	84134	-651	Non-CGI	TRUE	FALSE	FALSE
cg24435747	chr1	24514557	24514558	IFNLR1	163702	-791	CGI-S-Shore	TRUE	FALSE	FALSE
cg24444923	chr1	23280477	23280478	LOC729059	729059	61864	CGI	FALSE	FALSE	TRUE
cg24463527	chr1	215648453	215648454	KCTD3	51133	-92280	Non-CGI	FALSE	FALSE	TRUE
cg24467349	chr1	110254835	110254836	GSTM5	2949	-27	CGI	TRUE	FALSE	FALSE
cg24484895	chr1	2771846	2771847	TTC34	100287898	-65615	CGI	FALSE	FALSE	TRUE
cg24506221	chr1	110230401	110230402	GSTM1	2944	-15	CGI	TRUE	FALSE	FALSE
cg24516259	chr1	2428864	2428865	PLCH2	9651	21109	CGI-S-Shore	TRUE	TRUE	FALSE
cg24544320	chr1	226825435	226825436	C1orf95	375057	88933	Non-CGI	FALSE	TRUE	FALSE
cg24596788	chr1	163392923	163392924	NUF2	83540	101199	CGI	FALSE	FALSE	TRUE
cg24634568	chr1	43250769	43250770	LOC100129924	100129924	-2890	CGI	FALSE	FALSE	TRUE
cg24635754	chr1	117318185	117318186	CD2	914	21098	CGI	FALSE	FALSE	TRUE
cg24673742	chr1	37501164	37501165	GRIK3	2899	-1319	CGI	TRUE	FALSE	FALSE
cg24740868	chr1	60539362	60539363	C1orf87	127795	78	CGI-N-Shore	TRUE	FALSE	FALSE
cg24741158	chr1	2844168	2844169	ACTRT2	140625	-93876	CGI	FALSE	FALSE	TRUE
cg24834436	chr1	54941132	54941133	ACOT11	26027	-66796	CGI-S-Shore	FALSE	FALSE	TRUE
cg24845595	chr1	156814488	156814489	INSRR	3645	14222	CGI-N-Shore	FALSE	TRUE	FALSE
cg24860169	chr1	46924753	46924754	LOC729041	729041	25253	CGI-S-Shelf	FALSE	FALSE	TRUE
cg24875017	chr1	17026258	17026259	MIR3675	100500876	18507	CGI	FALSE	TRUE	FALSE
cg24878594	chr1	11708564	11708565	FBXO44	93611	-5866	CGI-N-Shore	FALSE	TRUE	FALSE
cg24878868	chr1	3607401	3607402	TP73	7161	38271	CGI	TRUE	TRUE	FALSE
cg24932660	chr1	27709575	27709576	CD164L2	388611	228	CGI-N-Shore	FALSE	TRUE	FALSE
cg24939838	chr1	3164390	3164391	MIR4251	100422968	119850	CGI	FALSE	TRUE	FALSE
cg24955895	chr1	25425923	25425924	SYF2	25949	133088	Non-CGI	FALSE	FALSE	TRUE
cg25001102	chr1	221068935	221068936	HLX	3142	16191	CGI	FALSE	FALSE	TRUE
cg25001930	chr1	147801789	147801790	PPIAL4B	653505	153628	CGI	FALSE	TRUE	FALSE
cg25010788	chr1	31654453	31654454	NKAIN1	79570	58279	CGI	FALSE	TRUE	FALSE
cg25017620	chr1	247802802	247802803	OR13G1	441933	33539	CGI	FALSE	FALSE	TRUE
cg25020286	chr1	18956947	18956948	PAX7	5081	-551	CGI	TRUE	FALSE	FALSE
cg25035631	chr1	35586358	35586359	ZMYM1	79830	41385	CGI-N-Shore	FALSE	FALSE	TRUE
cg25063151	chr1	1290554	1290555	DVL1	1855	-6061	CGI	FALSE	TRUE	FALSE
cg25066665	chr1	150335507	150335508	RPRD2	23248	-1481	CGI	TRUE	FALSE	FALSE
cg25137711	chr1	48059173	48059174	FOXD2	2306	157483	CGI	FALSE	FALSE	TRUE
cg25137787	chr1	2863815	2863816	ACTRT2	140625	-74229	CGI	FALSE	FALSE	TRUE
cg25140783	chr1	24861872	24861873	NCMAP	400746	-20693	CGI-S-Shore	FALSE	TRUE	FALSE
cg25196088	chr1	7703835	7703836	VAMP3	9341	-127492	Non-CGI	FALSE	TRUE	FALSE
cg25197238	chr1	18335878	18335879	IGSF21	84966	-98360	Non-CGI	FALSE	FALSE	TRUE
cg25198049	chr1	151509723	151509724	TUFT1	7286	-3056	CGI-N-Shelf	FALSE	TRUE	FALSE
cg25208724	chr1	156163844	156163845	SLC25A44	9673	113	CGI	TRUE	FALSE	FALSE
cg25210835	chr1	110254828	110254829	GSTM5	2949	-34	CGI	TRUE	FALSE	FALSE
cg25220063	chr1	247802774	247802775	OR13G1	441933	33567	CGI	FALSE	FALSE	TRUE
cg25221984	chr1	145714143	145714144	CD160	11126	1420	CGI	FALSE	TRUE	FALSE
cg25282951	chr1	15095376	15095377	KAZN	23254	170162	Non-CGI	FALSE	TRUE	FALSE
cg25286482	chr1	13909821	13909822	PDPN	10630	-429	CGI	TRUE	FALSE	FALSE
cg25314600	chr1	2191354	2191355	SKI	6497	31219	CGI	FALSE	TRUE	FALSE
cg25349729	chr1	214560352	214560353	SMYD2	56950	105786	CGI-S-Shelf	FALSE	TRUE	FALSE
cg25363807	chr1	44703923	44703924	DMAP1	55929	24797	CGI	FALSE	TRUE	FALSE
cg25367431	chr1	2846836	2846837	ACTRT2	140625	-91208	CGI-S-Shore	FALSE	FALSE	TRUE
cg25367926	chr1	201196047	201196048	IGFN1	91156	36093	Non-CGI	FALSE	TRUE	FALSE
cg25372296	chr1	98510328	98510329	MIR2682	100616452	577	CGI	FALSE	TRUE	FALSE
cg25384089	chr1	1961628	1961629	GABRD	2563	10859	CGI	FALSE	TRUE	FALSE
cg25407979	chr1	204256846	204256847	PLEKHA6	22874	72196	Non-CGI	FALSE	TRUE	FALSE
cg25463742	chr1	10839574	10839575	CASZ1	54897	17131	CGI	FALSE	TRUE	FALSE
cg25469418	chr1	15541349	15541350	FHAD1	114827	-32417	CGI	FALSE	TRUE	FALSE
cg25470758	chr1	31280143	31280144	LAPTM5	7805	-49459	CGI	FALSE	FALSE	TRUE
cg25610515	chr1	23495577	23495578	LUZP1	7798	8722	CGI-S-Shore	TRUE	TRUE	FALSE
cg25757115	chr1	46913787	46913788	LOC729041	729041	14287	CGI-N-Shore	FALSE	FALSE	TRUE
cg25758394	chr1	3623859	3623860	TP73-AS1	57212	40076	CGI-S-Shore	FALSE	TRUE	FALSE
cg25851313	chr1	16400665	16400666	FAM131C	348487	-537	CGI-S-Shore	TRUE	FALSE	FALSE
cg25851789	chr1	217309794	217309795	ESRRG	2104	1301	CGI	FALSE	TRUE	FALSE
cg25973293	chr1	1061647	1061648	C1orf159	54991	-9910	CGI	FALSE	FALSE	TRUE
cg25980388	chr1	5870397	5870398	MIR4689	100616421	52402	Non-CGI	FALSE	FALSE	TRUE
cg26004771	chr1	178456093	178456094	TEX35	84066	-26117	CGI	FALSE	FALSE	TRUE
cg26017930	chr1	2232166	2232167	LOC100129534	100129534	51932	CGI	FALSE	TRUE	FALSE
cg26022183	chr1	156215655	156215656	PAQR6	79957	2186	CGI	TRUE	TRUE	FALSE
cg26027853	chr1	15541446	15541447	FHAD1	114827	-32320	CGI	TRUE	TRUE	FALSE
cg26047066	chr1	221069136	221069137	HLX	3142	16392	CGI	FALSE	FALSE	TRUE
cg26048025	chr1	200843156	200843157	GPR25	2848	989	CGI	TRUE	FALSE	FALSE
cg26055950	chr1	3600852	3600853	TP73	7161	31722	CGI	FALSE	TRUE	FALSE
cg26066912	chr1	228403357	228403358	OBSCN	84033	7495	CGI	TRUE	TRUE	FALSE
cg26109154	chr1	245411604	245411605	KIF26B	55083	93316	CGI	FALSE	TRUE	FALSE
cg26220594	chr1	19110978	19110979	TAS1R2	80834	75175	CGI	FALSE	FALSE	TRUE
cg26223536	chr1	212820166	212820167	FAM71A	149647	22376	CGI	FALSE	FALSE	TRUE
cg26227225	chr1	2121039	2121040	C1orf86	199990	18131	CGI	TRUE	TRUE	FALSE
cg26251854	chr1	229252074	229252075	RAB4A	5867	-154803	Non-CGI	FALSE	FALSE	TRUE
cg26273958	chr1	228509696	228509697	TRIM11	81559	84819	CGI	FALSE	TRUE	FALSE
cg26337312	chr1	165321741	165321742	LMX1A	4009	4209	CGI	FALSE	TRUE	FALSE
cg26347197	chr1	84326669	84326670	TTLL7	79739	138162	CGI-S-Shore	TRUE	FALSE	FALSE
cg26354017	chr1	205819088	205819089	PM20D1	148811	186	CGI	TRUE	FALSE	FALSE
cg26363759	chr1	9377984	9377985	SPSB1	80176	25042	CGI-S-Shore	FALSE	TRUE	FALSE
cg26426080	chr1	3039210	3039211	MIR4251	100422968	-5327	CGI	FALSE	TRUE	FALSE
cg26426745	chr1	151810485	151810486	LOC100132111	100132111	-458	CGI	TRUE	TRUE	FALSE
cg26516532	chr1	17475832	17475833	PADI2	11240	-29883	CGI	FALSE	FALSE	TRUE
cg26599630	chr1	4718212	4718213	AJAP1	55966	3106	CGI-S-Shore	FALSE	TRUE	FALSE
cg26612821	chr1	167586938	167586939	RCSD1	92241	-12534	Non-CGI	FALSE	FALSE	TRUE
cg26690034	chr1	75198963	75198964	TYW3	127253	126	CGI	TRUE	FALSE	FALSE
cg26785743	chr1	3673224	3673225	CCDC27	148870	4258	CGI	FALSE	TRUE	FALSE
cg26793227	chr1	16483658	16483659	EPHA2	1969	-1075	CGI-S-Shore	TRUE	FALSE	FALSE
cg26816907	chr1	197890812	197890813	LHX9	56956	9176	CGI-S-Shore	FALSE	TRUE	FALSE
cg26829322	chr1	11713867	11713868	FBXO44	93611	-563	CGI-N-Shore	TRUE	TRUE	FALSE
cg26864230	chr1	47911508	47911509	FOXD2	2306	9818	CGI	FALSE	FALSE	TRUE
cg26875450	chr1	150530531	150530532	MIR4257	100422997	6125	CGI-S-Shore	TRUE	TRUE	FALSE
cg26915952	chr1	178456270	178456271	TEX35	84066	-25940	CGI	FALSE	FALSE	TRUE
cg26917828	chr1	226825448	226825449	C1orf95	375057	88946	Non-CGI	FALSE	TRUE	FALSE
cg27046936	chr1	78956847	78956848	PTGFR	5737	118	CGI	TRUE	FALSE	FALSE
cg27166581	chr1	155044322	155044323	LOC100505666	100505666	-7854	CGI-S-Shore	FALSE	TRUE	FALSE
cg27180868	chr1	161008750	161008751	TSTD1	100131187	22	CGI	TRUE	FALSE	FALSE
cg27222785	chr1	1008091	1008092	RNF223	401934	1594	CGI-S-Shore	TRUE	TRUE	FALSE
cg27449973	chr1	2111912	2111913	C1orf86	199990	27258	CGI	TRUE	TRUE	FALSE
cg27541454	chr1	975551	975552	AGRN	375790	20047	CGI	FALSE	TRUE	FALSE
cg27558541	chr1	110350324	110350325	EPS8L3	79574	-43679	Non-CGI	FALSE	FALSE	TRUE
cg00018128	chr2	162275746	162275747	TBR1	10716	3125	CGI-S-Shore	FALSE	TRUE	FALSE
cg00028211	chr2	45028802	45028803	SIX3	6496	-140233	CGI	FALSE	FALSE	TRUE
cg00028678	chr2	131674175	131674176	ARHGEF4	50649	1388	CGI	TRUE	FALSE	FALSE
cg00034336	chr2	8684126	8684127	ID2	3398	-137985	CGI-N-Shore	FALSE	FALSE	TRUE
cg00035316	chr2	176993017	176993018	HOXD8	3234	-1403	CGI	TRUE	FALSE	FALSE
cg00073794	chr2	30041338	30041339	ALK	238	103137	Non-CGI	FALSE	TRUE	FALSE
cg00074365	chr2	64088479	64088480	UGP2	7360	20380	Non-CGI	FALSE	TRUE	FALSE
cg00156118	chr2	85473750	85473751	TGOLN2	10618	81667	Non-CGI	FALSE	TRUE	FALSE
cg00158539	chr2	1859035	1859036	PXDN	7837	-110743	CGI	FALSE	TRUE	FALSE
cg00206058	chr2	11750918	11750919	NTSR2	23620	59409	CGI	TRUE	TRUE	FALSE
cg00217080	chr2	4050767	4050768	LOC100505964	100505964	-29144	CGI	FALSE	FALSE	TRUE
cg00224807	chr2	238065650	238065651	COPS8	10920	71565	CGI	FALSE	FALSE	TRUE
cg00256789	chr2	241083754	241083755	OTOS	150677	-3680	Non-CGI	FALSE	FALSE	TRUE
cg00320539	chr2	1983439	1983440	PXDN	7837	-235147	CGI	FALSE	TRUE	FALSE
cg00367962	chr2	240508665	240508666	LOC150935	150935	-175887	Non-CGI	FALSE	FALSE	TRUE
cg00436996	chr2	77962212	77962213	LRRTM4	80059	-212709	CGI	FALSE	FALSE	TRUE
cg00442205	chr2	10984512	10984513	PDIA6	10130	-6408	Non-CGI	FALSE	FALSE	TRUE
cg00450617	chr2	1237239	1237240	TPO	7173	-140754	CGI	FALSE	TRUE	FALSE
cg00471645	chr2	11270192	11270193	FLJ33534	285150	2153	CGI	FALSE	TRUE	FALSE
cg00522231	chr2	9549277	9549278	ITGB1BP1	9270	14364	CGI-N-Shore	FALSE	TRUE	FALSE
cg00548824	chr2	3452407	3452408	TRAPPC12	51112	68960	CGI	FALSE	TRUE	FALSE
cg00551617	chr2	152152581	152152582	NMI	9111	-6150	CGI	FALSE	FALSE	TRUE
cg00603435	chr2	142889367	142889368	LRP1B	53353	-96	CGI-S-Shore	TRUE	FALSE	FALSE
cg00643897	chr2	30142677	30142678	ALK	238	1798	CGI-N-Shore	FALSE	TRUE	FALSE
cg00748431	chr2	175629917	175629918	CHRNA1	1134	-716	Non-CGI	TRUE	TRUE	FALSE
cg00782200	chr2	145280523	145280524	ZEB2-AS1	100303491	-2056	CGI	FALSE	FALSE	TRUE
cg00793935	chr2	234847769	234847770	TRPM8	79054	21725	CGI	TRUE	TRUE	FALSE
cg00803453	chr2	220349615	220349616	GMPPA	29926	-13970	CGI	FALSE	TRUE	FALSE
cg00883831	chr2	208636032	208636033	FZD5	7855	-1888	CGI	TRUE	FALSE	FALSE
cg00914384	chr2	5593580	5593581	SOX11	6664	-239217	Non-CGI	FALSE	FALSE	TRUE
cg00926215	chr2	223162049	223162050	CCDC140	151278	-815	CGI	TRUE	TRUE	FALSE
cg00982548	chr2	198649783	198649784	BOLL	66037	1153	CGI	TRUE	TRUE	FALSE
cg01048749	chr2	8724685	8724686	ID2	3398	-97426	CGI	FALSE	FALSE	TRUE
cg01120289	chr2	240725308	240725309	LOC150935	150935	40753	CGI-S-Shore	FALSE	FALSE	TRUE
cg01128482	chr2	177028621	177028622	HOXD3	3232	-182	CGI-S-Shore	TRUE	FALSE	FALSE
cg01243312	chr2	136422981	136422982	MIR128-1	406915	13	Non-CGI	TRUE	TRUE	FALSE
cg01268571	chr2	170624998	170624999	SSB	6741	-30322	CGI	FALSE	FALSE	TRUE
cg01295339	chr2	74729710	74729711	LBX2-AS1	151534	-32	CGI	TRUE	TRUE	FALSE
cg01299579	chr2	10830716	10830717	NOL10	79954	-603	CGI-S-Shore	TRUE	FALSE	FALSE
cg01352656	chr2	118561680	118561681	DDX18	8886	-10573	CGI	FALSE	FALSE	TRUE
cg01357713	chr2	219696528	219696529	PRKAG3	53632	-15	Non-CGI	TRUE	FALSE	FALSE
cg01407254	chr2	71787808	71787809	DYSF	8291	107054	CGI-S-Shore	FALSE	TRUE	FALSE
cg01414185	chr2	177017449	177017450	HOXD4	3233	1335	CGI	FALSE	TRUE	FALSE
cg01472882	chr2	85980609	85980610	ATOH8	84913	-298	CGI	TRUE	FALSE	FALSE
cg01577475	chr2	114033581	114033582	PAX8	7849	2915	CGI	FALSE	TRUE	FALSE
cg01585348	chr2	102862214	102862215	IL1RL2	8808	58780	Non-CGI	FALSE	FALSE	TRUE
cg01604404	chr2	237460590	237460591	CXCR7	57007	-8832	Non-CGI	FALSE	FALSE	TRUE
cg01615704	chr2	110873396	110873397	MALL	7851	745	CGI	TRUE	FALSE	FALSE
cg01620164	chr2	164590272	164590273	FIGN	55137	2239	CGI-N-Shelf	FALSE	TRUE	FALSE
cg01695225	chr2	73152672	73152673	EMX1	2016	8067	CGI	FALSE	TRUE	FALSE
cg01696784	chr2	235904501	235904502	SH3BP4	23677	43872	CGI	TRUE	TRUE	FALSE
cg01708273	chr2	176974060	176974061	HOXD11	3237	4809	CGI	FALSE	TRUE	FALSE
cg01854776	chr2	235904366	235904367	SH3BP4	23677	43737	CGI	TRUE	TRUE	FALSE
cg01898698	chr2	105472759	105472760	POU3F3	5455	789	CGI	TRUE	FALSE	FALSE
cg01940425	chr2	63276565	63276566	OTX1	5013	-625	CGI-S-Shore	TRUE	FALSE	FALSE
cg01987333	chr2	242750561	242750562	NEU4	129807	400	CGI	TRUE	TRUE	FALSE
cg02139853	chr2	236867685	236867686	GBX2	2637	208965	CGI	FALSE	TRUE	FALSE
cg02187231	chr2	71132993	71132994	VAX2	25806	5272	CGI-S-Shore	FALSE	TRUE	FALSE
cg02219197	chr2	128175300	128175301	PROC	5624	-694	CGI-S-Shore	TRUE	FALSE	FALSE
cg02271560	chr2	55450737	55450738	RPS27A	6233	-8300	CGI	FALSE	TRUE	FALSE
cg02288088	chr2	119615605	119615606	EN1	2019	-9845	CGI	FALSE	FALSE	TRUE
cg02301319	chr2	239930865	239930866	MIR4440	100616397	59743	CGI	FALSE	FALSE	TRUE
cg02338778	chr2	23840763	23840764	KLHL29	114818	232464	CGI-S-Shore	FALSE	TRUE	FALSE
cg02473600	chr2	128173750	128173751	PROC	5624	-2244	CGI	FALSE	FALSE	TRUE
cg02488942	chr2	105480687	105480688	POU3F3	5455	8717	CGI	FALSE	FALSE	TRUE
cg02491905	chr2	10975305	10975306	PDIA6	10130	2796	CGI-N-Shore	FALSE	TRUE	FALSE
cg02514003	chr2	1378035	1378036	TPO	7173	39	CGI-S-Shore	TRUE	FALSE	FALSE
cg02552255	chr2	103104330	103104331	SLC9A4	389015	14567	Non-CGI	FALSE	TRUE	FALSE
cg02565132	chr2	109559473	109559474	EDAR	10913	46353	CGI	FALSE	TRUE	FALSE
cg02577387	chr2	231855524	231855525	LOC348761	348761	5221	CGI	FALSE	TRUE	FALSE
cg02583418	chr2	105473340	105473341	POU3F3	5455	1370	CGI	TRUE	FALSE	FALSE
cg02611848	chr2	74875387	74875388	M1AP	130951	68	CGI	TRUE	TRUE	FALSE
cg02639181	chr2	8978042	8978043	KIDINS220	57498	-286	CGI-S-Shore	TRUE	FALSE	FALSE
cg02670123	chr2	173330395	173330396	ITGA6	3655	38312	Non-CGI	FALSE	TRUE	FALSE
cg02683114	chr2	24398427	24398428	FAM228A	653140	895	CGI	FALSE	TRUE	FALSE
cg02739346	chr2	119600519	119600520	EN1	2019	5238	CGI	FALSE	TRUE	FALSE
cg02751808	chr2	71125521	71125522	VAX2	25806	-2197	CGI-S-Shore	FALSE	FALSE	TRUE
cg02757970	chr2	25427350	25427351	POMC	5443	-35790	CGI	FALSE	FALSE	TRUE
cg02781088	chr2	113192302	113192303	RGPD8	727851	-239	CGI	TRUE	FALSE	FALSE
cg02800216	chr2	237542624	237542625	CXCR7	57007	73199	Non-CGI	FALSE	FALSE	TRUE
cg02832915	chr2	70188531	70188532	ASPRV1	151516	864	Non-CGI	TRUE	FALSE	FALSE
cg02869459	chr2	220349208	220349209	GMPPA	29926	-14377	CGI	FALSE	TRUE	FALSE
cg03020006	chr2	202483740	202483741	ALS2CR11	151254	163	CGI	TRUE	FALSE	FALSE
cg03042666	chr2	240014781	240014782	MIR4441	100616493	-7158	CGI-N-Shore	FALSE	TRUE	FALSE
cg03064626	chr2	61778147	61778148	XPO1	7514	-12728	Non-CGI	FALSE	FALSE	TRUE
cg03129884	chr2	95692727	95692728	MAL	4118	1247	CGI	FALSE	TRUE	FALSE
cg03148124	chr2	174890849	174890850	SP3	6670	-60418	CGI	FALSE	FALSE	TRUE
cg03167844	chr2	817733	817734	LOC339822	339822	46377	CGI	FALSE	TRUE	FALSE
cg03181248	chr2	175199670	175199671	SP9	100131390	-149	CGI	TRUE	FALSE	FALSE
cg03217587	chr2	239403003	239403004	LOC151171	151171	61135	CGI	FALSE	FALSE	TRUE
cg03279522	chr2	236773146	236773147	GBX2	2637	303504	CGI	FALSE	TRUE	FALSE
cg03295928	chr2	74669349	74669350	RTKN	6242	-288	CGI	TRUE	FALSE	FALSE
cg03314473	chr2	241083794	241083795	OTOS	150677	-3720	Non-CGI	FALSE	FALSE	TRUE
cg03350828	chr2	66804865	66804866	MEIS1	4211	142332	CGI-S-Shore	FALSE	FALSE	TRUE
cg03383508	chr2	119591097	119591098	EN1	2019	14660	CGI	FALSE	FALSE	TRUE
cg03438674	chr2	241372300	241372301	GPC1	2817	-2813	CGI-N-Shelf	FALSE	FALSE	TRUE
cg03538480	chr2	8785262	8785263	ID2	3398	-36849	CGI	FALSE	FALSE	TRUE
cg03545077	chr2	1498138	1498139	TPO	7173	120142	CGI	FALSE	TRUE	FALSE
cg03687084	chr2	162364203	162364204	TBR1	10716	91582	CGI-N-Shore	FALSE	FALSE	TRUE
cg03738707	chr2	128453335	128453336	SFT2D3	84826	-5260	CGI	FALSE	FALSE	TRUE
cg03832522	chr2	218898668	218898669	RUFY4	285180	-987	CGI	TRUE	FALSE	FALSE
cg03936315	chr2	233749813	233749814	C2orf82	389084	14818	CGI-S-Shore	FALSE	TRUE	FALSE
cg03965648	chr2	200333401	200333402	SATB2-AS1	150538	579	CGI-N-Shore	TRUE	TRUE	FALSE
cg03997167	chr2	2829723	2829724	MYT1L	23040	-494677	Non-CGI	FALSE	FALSE	TRUE
cg04003871	chr2	241290895	241290896	GPC1	2817	-84218	CGI	FALSE	FALSE	TRUE
cg04065338	chr2	121101472	121101473	INHBB	3625	-2245	CGI	FALSE	FALSE	TRUE
cg04076766	chr2	71212157	71212158	ANKRD53	79998	6581	CGI	FALSE	TRUE	FALSE
cg04156729	chr2	240646190	240646191	LOC150935	150935	-38362	CGI-N-Shelf	FALSE	FALSE	TRUE
cg04194947	chr2	177012191	177012192	MIR10B	406903	-2838	CGI	FALSE	FALSE	TRUE
cg04220104	chr2	179387853	179387854	TTN-AS1	100506866	298	CGI	TRUE	TRUE	FALSE
cg04227922	chr2	119615496	119615497	EN1	2019	-9736	CGI	FALSE	FALSE	TRUE
cg04319873	chr2	164205343	164205344	FIGN	55137	387168	CGI	FALSE	FALSE	TRUE
cg04321919	chr2	149866741	149866742	LYPD6B	130576	-28238	CGI	FALSE	TRUE	FALSE
cg04330597	chr2	235907735	235907736	SH3BP4	23677	47106	CGI	FALSE	TRUE	FALSE
cg04337538	chr2	16190816	16190817	MYCNOS	10408	-108970	Non-CGI	FALSE	FALSE	TRUE
cg04397433	chr2	110873394	110873395	MALL	7851	747	CGI	TRUE	FALSE	FALSE
cg04505076	chr2	21255298	21255299	APOB	338	11645	Non-CGI	FALSE	TRUE	FALSE
cg04522045	chr2	172958324	172958325	DLX1	1745	8115	CGI-N-Shore	FALSE	FALSE	TRUE
cg04588356	chr2	3473852	3473853	ADI1	55256	49496	CGI	FALSE	TRUE	FALSE
cg04623297	chr2	102051587	102051588	RFX8	731220	39576	Non-CGI	FALSE	TRUE	FALSE
cg04627863	chr2	234741670	234741671	HJURP	55355	21540	Non-CGI	FALSE	TRUE	FALSE
cg04657470	chr2	198365150	198365151	HSPD1	3329	-151	CGI	TRUE	FALSE	FALSE
cg04680436	chr2	242842668	242842669	CXXC11	285093	30781	CGI	FALSE	FALSE	TRUE
cg04682087	chr2	875946	875947	LOC339822	339822	-11833	CGI	FALSE	FALSE	TRUE
cg04709676	chr2	464466	464467	FAM150B	285016	-176157	CGI-N-Shore	FALSE	FALSE	TRUE
cg04747036	chr2	6072981	6072982	LOC150622	150622	161	Non-CGI	TRUE	FALSE	FALSE
cg04767734	chr2	172958009	172958010	DLX1	1745	7800	CGI-N-Shore	FALSE	FALSE	TRUE
cg04770020	chr2	1544321	1544322	TPO	7173	166325	CGI	FALSE	TRUE	FALSE
cg04789315	chr2	140505028	140505029	YY1P2	647012	850133	Non-CGI	FALSE	FALSE	TRUE
cg04791242	chr2	240428286	240428287	HDAC4	9759	-104939	CGI	FALSE	FALSE	TRUE
cg04864807	chr2	121412139	121412140	GLI2	2736	-81058	CGI	FALSE	FALSE	TRUE
cg04935434	chr2	177024947	177024948	HOXD3	3232	-3856	CGI	FALSE	FALSE	TRUE
cg04944682	chr2	92262463	92262464	ACTR3BP2	440888	133303	CGI	FALSE	FALSE	TRUE
cg04951371	chr2	3317860	3317861	TSSC1	7260	63791	CGI	FALSE	TRUE	FALSE
cg04983151	chr2	202483704	202483705	ALS2CR11	151254	199	CGI	TRUE	FALSE	FALSE
cg05021643	chr2	177029608	177029609	HOXD3	3232	802	CGI	FALSE	TRUE	FALSE
cg05113927	chr2	27531244	27531245	UCN	7349	-113	CGI	TRUE	FALSE	FALSE
cg05146544	chr2	134785775	134785776	MIR3679	100500878	-98919	CGI	FALSE	FALSE	TRUE
cg05148373	chr2	183387516	183387517	PDE1A	5136	-8	Non-CGI	TRUE	FALSE	FALSE
cg05165940	chr2	200329654	200329655	SATB2-AS1	150538	-3165	CGI	TRUE	TRUE	FALSE
cg05168012	chr2	102867275	102867276	IL18R1	8809	-60685	CGI	FALSE	FALSE	TRUE
cg05214685	chr2	223177493	223177494	PAX3	5077	-13777	CGI	FALSE	FALSE	TRUE
cg05225012	chr2	96055346	96055347	FAHD2A	51011	-13100	CGI	FALSE	FALSE	TRUE
cg05247661	chr2	30472410	30472411	LBH	81606	18012	Non-CGI	FALSE	TRUE	FALSE
cg05291025	chr2	233897149	233897150	NEU2	4759	-231	CGI-N-Shore	TRUE	FALSE	FALSE
cg05298696	chr2	70188691	70188692	ASPRV1	151516	704	Non-CGI	TRUE	FALSE	FALSE
cg05359249	chr2	220406470	220406471	TMEM198	130612	-1913	CGI	TRUE	TRUE	FALSE
cg05391892	chr2	208795620	208795621	PLEKHM3	389072	94662	CGI	FALSE	TRUE	FALSE
cg05413258	chr2	238707372	238707373	RBM44	375316	-14	CGI	TRUE	FALSE	FALSE
cg05422049	chr2	1595734	1595735	PXDN	7837	152555	CGI	FALSE	FALSE	TRUE
cg05494439	chr2	233310098	233310099	ALPI	248	-10733	Non-CGI	FALSE	FALSE	TRUE
cg05514256	chr2	45231891	45231892	SIX2	10736	4649	CGI	FALSE	FALSE	TRUE
cg05525812	chr2	177022646	177022647	HOXD3	3232	-6157	CGI	FALSE	FALSE	TRUE
cg05582690	chr2	128158906	128158907	PROC	5624	-17088	CGI-S-Shore	FALSE	FALSE	TRUE
cg05587394	chr2	23777246	23777247	KLHL29	114818	168947	CGI-N-Shore	FALSE	TRUE	FALSE
cg05669418	chr2	177022962	177022963	HOXD3	3232	-5841	CGI	FALSE	FALSE	TRUE
cg05672223	chr2	43328033	43328034	ZFP36L2	678	125710	CGI	FALSE	FALSE	TRUE
cg05674602	chr2	16153506	16153507	MYCNOS	10408	-71660	CGI-N-Shore	FALSE	FALSE	TRUE
cg05736236	chr2	222435214	222435215	EPHA4	2043	1794	CGI	FALSE	TRUE	FALSE
cg05766948	chr2	136783356	136783357	DARS	1615	-40133	CGI	FALSE	FALSE	TRUE
cg05779786	chr2	237028849	237028850	GBX2	2637	47801	CGI	FALSE	TRUE	FALSE
cg05852568	chr2	95537405	95537406	TEKT4	150483	172	CGI	TRUE	TRUE	FALSE
cg05875302	chr2	242844781	242844782	CXXC11	285093	32894	CGI	FALSE	FALSE	TRUE
cg05903289	chr2	130345205	130345206	LOC389033	389033	346683	CGI	FALSE	FALSE	TRUE
cg05979020	chr2	176981336	176981337	HOXD10	3236	-154	CGI	TRUE	FALSE	FALSE
cg05996160	chr2	16124662	16124663	MYCNOS	10408	-42816	CGI	FALSE	FALSE	TRUE
cg06010459	chr2	149634726	149634727	KIF5C	3800	1933	CGI	FALSE	TRUE	FALSE
cg06102419	chr2	239139911	239139912	LOC151174	151174	405	CGI-N-Shore	TRUE	TRUE	FALSE
cg06156640	chr2	3704363	3704364	ALLC	55821	-1421	CGI-N-Shore	TRUE	FALSE	FALSE
cg06193597	chr2	241896910	241896911	LOC200772	200772	9956	Non-CGI	FALSE	TRUE	FALSE
cg06201514	chr2	1817409	1817410	PXDN	7837	-69117	CGI	FALSE	TRUE	FALSE
cg06320642	chr2	3063448	3063449	TSSC1	7260	318203	CGI	FALSE	TRUE	FALSE
cg06360976	chr2	3452543	3452544	TRAPPC12	51112	69096	CGI	FALSE	TRUE	FALSE
cg06390651	chr2	177023667	177023668	HOXD3	3232	-5136	CGI	FALSE	FALSE	TRUE
cg06392126	chr2	228882353	228882354	DAW1	164781	146025	CGI	FALSE	TRUE	FALSE
cg06399427	chr2	161504772	161504773	RBMS1	5937	-154453	CGI-N-Shore	FALSE	FALSE	TRUE
cg06471380	chr2	240878436	240878437	MIR4786	100616417	4073	CGI	FALSE	FALSE	TRUE
cg06478504	chr2	240174613	240174614	MIR4269	100423043	-52542	CGI-S-Shore	FALSE	TRUE	FALSE
cg06500727	chr2	1417164	1417165	TPO	7173	39168	Non-CGI	TRUE	TRUE	FALSE
cg06520814	chr2	467034	467035	FAM150B	285016	-178725	CGI	FALSE	FALSE	TRUE
cg06545389	chr2	219906245	219906246	CCDC108	255101	0	CGI	TRUE	FALSE	FALSE
cg06627617	chr2	9471179	9471180	ITGB1BP1	9270	92462	CGI-N-Shore	FALSE	TRUE	FALSE
cg06636195	chr2	109533679	109533680	EDAR	10913	72147	Non-CGI	FALSE	TRUE	FALSE
cg06676049	chr2	23839842	23839843	KLHL29	114818	231543	CGI	FALSE	TRUE	FALSE
cg06736663	chr2	219754761	219754762	WNT10A	80326	9505	CGI-N-Shelf	FALSE	TRUE	FALSE
cg06741367	chr2	128453108	128453109	SFT2D3	84826	-5487	CGI-N-Shore	FALSE	FALSE	TRUE
cg06757994	chr2	15830903	15830904	DDX1	1653	99132	Non-CGI	TRUE	FALSE	FALSE
cg06760904	chr2	1827764	1827765	PXDN	7837	-79472	Non-CGI	FALSE	TRUE	FALSE
cg06797617	chr2	88649907	88649908	FOXI3	344167	102144	CGI-N-Shore	FALSE	FALSE	TRUE
cg06829186	chr2	233749749	233749750	C2orf82	389084	14754	CGI-S-Shore	FALSE	TRUE	FALSE
cg06833110	chr2	66673316	66673317	MEIS1	4211	10783	CGI	FALSE	TRUE	FALSE
cg06881093	chr2	114035983	114035984	PAX8	7849	513	CGI	TRUE	TRUE	FALSE
cg06916239	chr2	223162881	223162882	CCDC140	151278	14	CGI-S-Shore	TRUE	TRUE	FALSE
cg06946452	chr2	119606631	119606632	EN1	2019	-871	CGI	TRUE	FALSE	FALSE
cg06994420	chr2	66672553	66672554	MEIS1	4211	10020	CGI	FALSE	TRUE	FALSE
cg07150777	chr2	239996253	239996254	MIR4440	100616397	-5642	CGI-N-Shelf	FALSE	TRUE	FALSE
cg07163991	chr2	128381835	128381836	GPR17	2840	-21602	CGI-S-Shore	FALSE	TRUE	FALSE
cg07203423	chr2	74743009	74743010	TLX2	3196	2322	CGI	FALSE	TRUE	FALSE
cg07214164	chr2	105480254	105480255	POU3F3	5455	8284	CGI	FALSE	FALSE	TRUE
cg07218647	chr2	121338498	121338499	LOC84931	84931	-114572	CGI	FALSE	FALSE	TRUE
cg07316846	chr2	105484694	105484695	POU3F3	5455	12724	CGI	FALSE	TRUE	FALSE
cg07339783	chr2	176952826	176952827	EVX2	344191	-4135	CGI	FALSE	FALSE	TRUE
cg07455789	chr2	232419317	232419318	NMUR1	10316	-24134	Non-CGI	FALSE	FALSE	TRUE
cg07490070	chr2	97505464	97505465	ANKRD23	200539	4292	CGI	FALSE	TRUE	FALSE
cg07532089	chr2	71018354	71018355	FIGLA	344018	-578	CGI-S-Shore	TRUE	FALSE	FALSE
cg07537917	chr2	241836409	241836410	C2orf54	79919	-835	CGI-S-Shore	TRUE	FALSE	FALSE
cg07540421	chr2	71115680	71115681	VAX2	25806	-12038	CGI	FALSE	FALSE	TRUE
cg07591442	chr2	69615105	69615106	GFPT1	2673	-718	CGI-S-Shore	TRUE	FALSE	FALSE
cg07628769	chr2	241076208	241076209	MYEOV2	150678	-443	CGI	TRUE	FALSE	FALSE
cg07644196	chr2	105473969	105473970	POU3F3	5455	1999	CGI	FALSE	FALSE	TRUE
cg07673080	chr2	240241154	240241155	MIR4269	100423043	13996	CGI-S-Shore	FALSE	TRUE	FALSE
cg07679370	chr2	145795797	145795798	DKFZp686O1327	401014	370262	Non-CGI	FALSE	TRUE	FALSE
cg07702693	chr2	11118564	11118565	KCNF1	3754	66500	CGI	FALSE	FALSE	TRUE
cg07722359	chr2	239318105	239318106	ASB1	51665	-17519	CGI-N-Shore	FALSE	FALSE	TRUE
cg07752650	chr2	240399366	240399367	HDAC4	9759	-76019	CGI	FALSE	FALSE	TRUE
cg07755735	chr2	20870362	20870363	GDF7	151449	3937	CGI	FALSE	TRUE	FALSE
cg07811002	chr2	166535708	166535709	GALNT3	2591	115459	Non-CGI	FALSE	TRUE	FALSE
cg07815287	chr2	9345967	9345968	ASAP2	8853	-925	CGI-N-Shore	TRUE	FALSE	FALSE
cg07815799	chr2	131674140	131674141	ARHGEF4	50649	1353	CGI	TRUE	FALSE	FALSE
cg07835424	chr2	200327334	200327335	SATB2-AS1	150538	-5485	CGI	FALSE	TRUE	FALSE
cg07855242	chr2	1841068	1841069	PXDN	7837	-92776	CGI-N-Shore	FALSE	TRUE	FALSE
cg07916022	chr2	133402827	133402828	LYPD1	116372	26241	CGI	FALSE	TRUE	FALSE
cg07919936	chr2	451875	451876	FAM150B	285016	-163566	CGI	FALSE	FALSE	TRUE
cg07936672	chr2	97173713	97173714	NEURL3	93082	131	CGI	TRUE	FALSE	FALSE
cg07936950	chr2	172953134	172953135	DLX1	1745	2925	CGI	FALSE	TRUE	FALSE
cg08012278	chr2	237068350	237068351	GBX2	2637	8300	CGI	FALSE	FALSE	TRUE
cg08085232	chr2	65598271	65598272	SPRED2	200734	61383	Non-CGI	FALSE	TRUE	FALSE
cg08094235	chr2	3463558	3463559	ADI1	55256	59790	CGI-S-Shore	FALSE	TRUE	FALSE
cg08102264	chr2	129548428	129548429	HS6ST1	9394	-472256	CGI-S-Shore	FALSE	FALSE	TRUE
cg08107308	chr2	240234604	240234605	MIR4269	100423043	7446	CGI	FALSE	TRUE	FALSE
cg08147523	chr2	1276773	1276774	TPO	7173	-101220	Non-CGI	FALSE	TRUE	FALSE
cg08180229	chr2	6122814	6122815	LOC400940	400940	703	CGI-N-Shore	FALSE	TRUE	FALSE
cg08200420	chr2	241896967	241896968	LOC200772	200772	9899	Non-CGI	FALSE	TRUE	FALSE
cg08217163	chr2	66809959	66809960	MEIS1	4211	147426	CGI	FALSE	FALSE	TRUE
cg08310581	chr2	131797438	131797439	FAM168B	130074	53564	CGI	TRUE	TRUE	FALSE
cg08351100	chr2	200331917	200331918	SATB2-AS1	150538	-902	CGI-N-Shore	TRUE	TRUE	FALSE
cg08355260	chr2	74729429	74729430	LBX2-AS1	151534	-313	CGI	TRUE	TRUE	FALSE
cg08440178	chr2	2737278	2737279	MYT1L	23040	-402232	CGI	FALSE	FALSE	TRUE
cg08474164	chr2	177503596	177503597	LOC375295	375295	-1293	CGI	TRUE	FALSE	FALSE
cg08570472	chr2	26408040	26408041	GAREML	150946	12079	CGI	FALSE	TRUE	FALSE
cg08613144	chr2	133428836	133428837	LYPD1	116372	232	CGI	TRUE	FALSE	FALSE
cg08690859	chr2	200333729	200333730	SATB2-AS1	150538	907	CGI	TRUE	TRUE	FALSE
cg08750504	chr2	172946193	172946194	DLX1	1745	-4013	CGI	FALSE	FALSE	TRUE
cg08791424	chr2	208795653	208795654	PLEKHM3	389072	94629	CGI	FALSE	TRUE	FALSE
cg08800613	chr2	1595498	1595499	PXDN	7837	152791	CGI	FALSE	FALSE	TRUE
cg08813888	chr2	662396	662397	TMEM18	129787	15041	CGI-S-Shore	FALSE	FALSE	TRUE
cg08847856	chr2	106184698	106184699	LOC285000	285000	42316	CGI	FALSE	FALSE	TRUE
cg08940511	chr2	241922778	241922779	SNED1	25992	-15475	CGI-N-Shore	FALSE	TRUE	FALSE
cg08945850	chr2	15948558	15948559	MYCN	4613	-132123	CGI	FALSE	FALSE	TRUE
cg08976687	chr2	85515537	85515538	TGOLN2	10618	39880	Non-CGI	FALSE	TRUE	FALSE
cg08980304	chr2	3697378	3697379	ALLC	55821	-8406	CGI	FALSE	FALSE	TRUE
cg09001028	chr2	173599806	173599807	RAPGEF4	11069	-717	CGI-N-Shore	TRUE	TRUE	FALSE
cg09001939	chr2	11810534	11810535	NTSR2	23620	-204	CGI	TRUE	FALSE	FALSE
cg09015973	chr2	131673771	131673772	ARHGEF4	50649	984	CGI	TRUE	FALSE	FALSE
cg09059267	chr2	220223082	220223083	RESP18	389075	-25182	CGI	FALSE	FALSE	TRUE
cg09068086	chr2	110970204	110970205	NPHP1	4867	-7564	CGI	FALSE	TRUE	FALSE
cg09074113	chr2	20870087	20870088	GDF7	151449	3662	CGI	FALSE	TRUE	FALSE
cg09173768	chr2	176989349	176989350	HOXD9	3235	1935	CGI-S-Shore	FALSE	TRUE	FALSE
cg09234973	chr2	113975820	113975821	LOC654433	654433	-17285	Non-CGI	FALSE	TRUE	FALSE
cg09236434	chr2	99553642	99553643	KIAA1211L	343990	-957	CGI	TRUE	FALSE	FALSE
cg09257277	chr2	134492138	134492139	NCKAP5	344148	-166106	Non-CGI	FALSE	FALSE	TRUE
cg09283548	chr2	233404220	233404221	CHRNG	1146	-215	Non-CGI	TRUE	FALSE	FALSE
cg09286409	chr2	117829225	117829226	DDX18	8886	-743028	CGI-N-Shore	FALSE	FALSE	TRUE
cg09323727	chr2	176936436	176936437	EVX2	344191	12252	CGI	FALSE	FALSE	TRUE
cg09336899	chr2	233766002	233766003	C2orf82	389084	31007	CGI	FALSE	TRUE	FALSE
cg09340386	chr2	1605954	1605955	PXDN	7837	142335	CGI	FALSE	FALSE	TRUE
cg09361493	chr2	231715028	231715029	ITM2C	81618	-14591	CGI-S-Shore	FALSE	FALSE	TRUE
cg09385093	chr2	119607885	119607886	EN1	2019	-2125	CGI-S-Shore	FALSE	FALSE	TRUE
cg09508362	chr2	1377756	1377757	TPO	7173	-237	CGI-N-Shore	TRUE	FALSE	FALSE
cg09514310	chr2	171553350	171553351	LOC440925	440925	17725	Non-CGI	TRUE	FALSE	FALSE
cg09527270	chr2	25390385	25390386	POMC	5443	1172	CGI	FALSE	TRUE	FALSE
cg09535924	chr2	66671659	66671660	MEIS1	4211	9126	CGI	FALSE	TRUE	FALSE
cg09563922	chr2	121200209	121200210	LOC84931	84931	23714	CGI-S-Shore	FALSE	FALSE	TRUE
cg09601912	chr2	119591144	119591145	EN1	2019	14613	CGI	FALSE	FALSE	TRUE
cg09605095	chr2	5847414	5847415	SOX11	6664	14614	CGI	FALSE	FALSE	TRUE
cg09610018	chr2	121433074	121433075	GLI2	2736	-60123	CGI	FALSE	FALSE	TRUE
cg09616559	chr2	25921151	25921152	DTNB	1838	-24647	Non-CGI	TRUE	FALSE	FALSE
cg09717809	chr2	74375930	74375931	BOLA3-AS1	100507171	821	CGI-S-Shore	TRUE	TRUE	FALSE
cg09799983	chr2	38301756	38301757	CYP1B1	1545	1565	CGI	FALSE	TRUE	FALSE
cg09829013	chr2	215572390	215572391	BARD1	580	102036	Non-CGI	FALSE	FALSE	TRUE
cg09839592	chr2	239478514	239478515	LOC151171	151171	-14373	CGI	FALSE	FALSE	TRUE
cg09861583	chr2	238769419	238769420	RAMP1	10267	1231	CGI	FALSE	TRUE	FALSE
cg09974661	chr2	3642634	3642635	COLEC11	78989	-1	CGI	TRUE	FALSE	FALSE
cg09982942	chr2	112898400	112898401	FBLN7	129804	2437	CGI	FALSE	TRUE	FALSE
cg09991306	chr2	241975140	241975141	SNED1	25992	36884	CGI	FALSE	TRUE	FALSE
cg10012393	chr2	440148	440149	FAM150B	285016	-151839	CGI-S-Shore	FALSE	FALSE	TRUE
cg10012722	chr2	237085763	237085764	GBX2	2637	-9110	CGI	FALSE	FALSE	TRUE
cg10067510	chr2	48844971	48844972	GTF2A1L	11036	33	CGI	TRUE	TRUE	FALSE
cg10075506	chr2	1817351	1817352	PXDN	7837	-69059	CGI	FALSE	TRUE	FALSE
cg10078335	chr2	241535845	241535846	GPR35	2859	-8978	CGI	FALSE	TRUE	FALSE
cg10089801	chr2	203036235	203036236	SUMO1	7341	67085	CGI	FALSE	TRUE	FALSE
cg10142874	chr2	11917623	11917624	MIR4262	100422996	59487	CGI	FALSE	TRUE	FALSE
cg10147348	chr2	101584913	101584914	RPL31	6160	-33776	Non-CGI	FALSE	TRUE	FALSE
cg10159630	chr2	177037364	177037365	HOXD3	3232	8558	CGI	FALSE	TRUE	FALSE
cg10168149	chr2	200335558	200335559	SATB2	23314	429	CGI	TRUE	TRUE	FALSE
cg10178270	chr2	1913552	1913553	PXDN	7837	-165260	Non-CGI	FALSE	TRUE	FALSE
cg10236778	chr2	858127	858128	LOC339822	339822	5983	CGI	FALSE	TRUE	FALSE
cg10243004	chr2	128616167	128616168	POLR2D	5433	-437	CGI-S-Shore	TRUE	FALSE	FALSE
cg10258241	chr2	52856751	52856752	CHAC2	494143	-1138176	CGI-N-Shore	FALSE	FALSE	TRUE
cg10269365	chr2	223166989	223166990	PAX3	5077	-3273	CGI	TRUE	TRUE	FALSE
cg10357060	chr2	27124343	27124344	DPYSL5	56896	53373	Non-CGI	FALSE	TRUE	FALSE
cg10366439	chr2	110970249	110970250	NPHP1	4867	-7609	CGI	FALSE	TRUE	FALSE
cg10397934	chr2	242868376	242868377	CXXC11	285093	56489	CGI	FALSE	FALSE	TRUE
cg10398905	chr2	97406466	97406467	LMAN2L	81562	-652	CGI-S-Shore	TRUE	FALSE	FALSE
cg10429573	chr2	240746616	240746617	LOC150935	150935	62061	CGI-N-Shore	FALSE	FALSE	TRUE
cg10547527	chr2	198650123	198650124	BOLL	66037	813	CGI	TRUE	TRUE	FALSE
cg10549986	chr2	7018153	7018154	RSAD2	91543	356	Non-CGI	TRUE	FALSE	FALSE
cg10553204	chr2	20871195	20871196	GDF7	151449	4770	CGI	FALSE	TRUE	FALSE
cg10709593	chr2	172952883	172952884	DLX1	1745	2674	CGI	FALSE	TRUE	FALSE
cg10717312	chr2	241976244	241976245	SNED1	25992	37988	CGI	FALSE	TRUE	FALSE
cg10727812	chr2	211179707	211179708	MYL1	4632	186	Non-CGI	TRUE	FALSE	FALSE
cg10753836	chr2	176989485	176989486	HOXD9	3235	2071	CGI	FALSE	TRUE	FALSE
cg10808195	chr2	60442527	60442528	MIR4432	100616473	172051	Non-CGI	FALSE	FALSE	TRUE
cg10846682	chr2	238805257	238805258	RAMP1	10267	37069	Non-CGI	FALSE	TRUE	FALSE
cg10982364	chr2	200329670	200329671	SATB2-AS1	150538	-3149	CGI	TRUE	TRUE	FALSE
cg11380881	chr2	2829731	2829732	MYT1L	23040	-494685	Non-CGI	FALSE	FALSE	TRUE
cg11597131	chr2	176988939	176988940	HOXD9	3235	1525	CGI	FALSE	TRUE	FALSE
cg11669516	chr2	217501092	217501093	IGFBP2	3485	2964	CGI-S-Shore	FALSE	TRUE	FALSE
cg11726648	chr2	19561035	19561036	OSR1	130497	-2662	CGI	FALSE	FALSE	TRUE
cg11763394	chr2	113992921	113992922	LOC654433	654433	-184	CGI-N-Shore	TRUE	TRUE	FALSE
cg11904906	chr2	239140032	239140033	LOC151174	151174	284	CGI	TRUE	FALSE	FALSE
cg11946719	chr2	233216220	233216221	ALPP	250	-27126	CGI	FALSE	FALSE	TRUE
cg12044685	chr2	72370665	72370666	CYP26B1	56603	4296	CGI	FALSE	TRUE	FALSE
cg12058021	chr2	240019103	240019104	MIR4441	100616493	-11480	CGI	FALSE	TRUE	FALSE
cg12070646	chr2	71149811	71149812	ATP6V1B1	525	-13185	Non-CGI	FALSE	TRUE	FALSE
cg12161959	chr2	240868337	240868338	MIR4786	100616417	14172	CGI	FALSE	FALSE	TRUE
cg12231969	chr2	119605253	119605254	EN1	2019	504	CGI-S-Shore	TRUE	FALSE	FALSE
cg12236088	chr2	105275812	105275813	LOC284998	284998	98363	CGI	FALSE	FALSE	TRUE
cg12245706	chr2	71823484	71823485	DYSF	8291	142730	Non-CGI	FALSE	TRUE	FALSE
cg12302982	chr2	39471028	39471029	CDKL4	344387	-14354	CGI	FALSE	FALSE	TRUE
cg12305200	chr2	119607097	119607098	EN1	2019	-1337	CGI	TRUE	FALSE	FALSE
cg12433473	chr2	220406756	220406757	TMEM198	130612	-1627	CGI	TRUE	TRUE	FALSE
cg12436738	chr2	236579780	236579781	AGAP1	116987	177046	CGI	FALSE	TRUE	FALSE
cg12504882	chr2	176977374	176977375	HOXD10	3236	-4116	CGI	FALSE	FALSE	TRUE
cg12520549	chr2	162280741	162280742	TBR1	10716	8120	CGI	FALSE	TRUE	FALSE
cg12535642	chr2	120020901	120020902	STEAP3	55240	39516	CGI	FALSE	TRUE	FALSE
cg12564102	chr2	108086048	108086049	LOC729121	729121	357235	CGI	FALSE	FALSE	TRUE
cg12565126	chr2	24233931	24233932	MFSD2B	388931	977	CGI	TRUE	TRUE	FALSE
cg12602409	chr2	177039568	177039569	HOXD3	3232	10762	CGI	FALSE	TRUE	FALSE
cg12680131	chr2	1417153	1417154	TPO	7173	39157	Non-CGI	TRUE	TRUE	FALSE
cg12747584	chr2	6712764	6712765	LINC00487	400941	197676	Non-CGI	FALSE	FALSE	TRUE
cg12756150	chr2	241140248	241140249	OTOS	150677	-60174	Non-CGI	FALSE	FALSE	TRUE
cg12821876	chr2	496855	496856	TMEM18	129787	180582	CGI	FALSE	FALSE	TRUE
cg12877020	chr2	239996263	239996264	MIR4440	100616397	-5652	CGI-N-Shelf	FALSE	TRUE	FALSE
cg12889195	chr2	113992843	113992844	LOC654433	654433	-262	CGI-N-Shore	TRUE	TRUE	FALSE
cg12941754	chr2	242851406	242851407	CXXC11	285093	39519	CGI	FALSE	FALSE	TRUE
cg13007502	chr2	208795771	208795772	PLEKHM3	389072	94511	CGI	FALSE	TRUE	FALSE
cg13144059	chr2	201245077	201245078	SPATS2L	26010	74472	Non-CGI	FALSE	TRUE	FALSE
cg13174084	chr2	84517877	84517878	FUNDC2P2	388965	70	CGI	TRUE	FALSE	FALSE
cg13180315	chr2	177024294	177024295	HOXD3	3232	-4509	CGI	FALSE	FALSE	TRUE
cg13220917	chr2	242480249	242480250	BOK	666	-17895	CGI	FALSE	FALSE	TRUE
cg13224852	chr2	65519735	65519736	ACTR2	10097	64905	CGI	FALSE	FALSE	TRUE
cg13226232	chr2	128158601	128158602	PROC	5624	-17393	CGI	FALSE	FALSE	TRUE
cg13231954	chr2	8724414	8724415	ID2	3398	-97697	CGI	FALSE	FALSE	TRUE
cg13261971	chr2	45231226	45231227	SIX2	10736	5314	CGI-N-Shore	FALSE	FALSE	TRUE
cg13283952	chr2	121412005	121412006	GLI2	2736	-81192	CGI	FALSE	FALSE	TRUE
cg13316854	chr2	177027856	177027857	HOXD3	3232	-947	CGI	TRUE	FALSE	FALSE
cg13321077	chr2	220196755	220196756	RESP18	389075	1142	CGI	TRUE	TRUE	FALSE
cg13362112	chr2	97174246	97174247	NEURL3	93082	-399	CGI	TRUE	FALSE	FALSE
cg13393505	chr2	241386846	241386847	MIR149	406941	-8570	CGI	FALSE	TRUE	FALSE
cg13448968	chr2	220406543	220406544	TMEM198	130612	-1840	CGI	TRUE	TRUE	FALSE
cg13504055	chr2	102234418	102234419	MAP4K4	9448	-79745	Non-CGI	FALSE	FALSE	TRUE
cg13530938	chr2	239140190	239140191	LOC151174	151174	126	CGI	TRUE	FALSE	FALSE
cg13537237	chr2	241908681	241908682	LOC200772	200772	-1812	Non-CGI	TRUE	FALSE	FALSE
cg13597316	chr2	29287853	29287854	C2orf71	388939	9272	Non-CGI	FALSE	TRUE	FALSE
cg13650504	chr2	692026	692027	TMEM18	129787	-14586	CGI	FALSE	FALSE	TRUE
cg13656404	chr2	106959384	106959385	PLGLA	285189	-43383	CGI	FALSE	FALSE	TRUE
cg13687935	chr2	1895961	1895962	PXDN	7837	-147669	CGI	FALSE	TRUE	FALSE
cg13749477	chr2	241076189	241076190	MYEOV2	150678	-424	CGI	TRUE	FALSE	FALSE
cg13773247	chr2	42276988	42276989	PKDCC	91461	1826	CGI-S-Shore	FALSE	TRUE	FALSE
cg13828701	chr2	25457215	25457216	POMC	5443	-65655	CGI	FALSE	TRUE	FALSE
cg13831106	chr2	2119853	2119854	LOC730811	730811	-203149	CGI	FALSE	TRUE	FALSE
cg13832669	chr2	119609429	119609430	EN1	2019	-3669	CGI-S-Shore	FALSE	FALSE	TRUE
cg13872005	chr2	105275613	105275614	LOC284998	284998	98562	CGI	FALSE	FALSE	TRUE
cg13885205	chr2	197466195	197466196	HECW2	57520	-8859	Non-CGI	FALSE	FALSE	TRUE
cg13898875	chr2	36980923	36980924	VIT	5212	57089	Non-CGI	FALSE	TRUE	FALSE
cg13973086	chr2	469105	469106	FAM150B	285016	-180796	CGI	FALSE	FALSE	TRUE
cg14013597	chr2	131046122	131046123	CCDC115	84317	53798	CGI	FALSE	FALSE	TRUE
cg14020052	chr2	240174659	240174660	MIR4269	100423043	-52496	CGI	FALSE	TRUE	FALSE
cg14042190	chr2	2547089	2547090	MYT1L	23040	-212043	Non-CGI	FALSE	FALSE	TRUE
cg14056738	chr2	64549818	64549819	LINC00309	150992	-117198	Non-CGI	FALSE	FALSE	TRUE
cg14157435	chr2	206628692	206628693	NRP2	8828	81467	CGI-S-Shore	FALSE	TRUE	FALSE
cg14196395	chr2	71823517	71823518	DYSF	8291	142763	Non-CGI	FALSE	TRUE	FALSE
cg14245471	chr2	10567843	10567844	SNORA80B	100302743	19130	CGI	FALSE	FALSE	TRUE
cg14247008	chr2	242786046	242786047	PDCD1	5133	15010	CGI	FALSE	FALSE	TRUE
cg14253461	chr2	105363367	105363368	LOC284998	284998	10808	CGI-N-Shore	FALSE	TRUE	FALSE
cg14266287	chr2	239334506	239334507	ASB1	51665	-1118	CGI	TRUE	FALSE	FALSE
cg14274989	chr2	119606302	119606303	EN1	2019	-542	CGI	TRUE	FALSE	FALSE
cg14323539	chr2	928750	928751	SNTG2	54221	-17802	CGI	FALSE	FALSE	TRUE
cg14397893	chr2	23777302	23777303	KLHL29	114818	169003	CGI	FALSE	TRUE	FALSE
cg14410016	chr2	176986659	176986660	HOXD9	3235	-752	CGI	TRUE	FALSE	FALSE
cg14412622	chr2	75873674	75873675	MRPL19	9801	-233	CGI-N-Shore	TRUE	FALSE	FALSE
cg14417784	chr2	131009681	131009682	TUBA3E	112714	-53646	CGI	FALSE	FALSE	TRUE
cg14447606	chr2	72370328	72370329	CYP26B1	56603	4633	CGI	FALSE	TRUE	FALSE
cg14454796	chr2	242031694	242031695	MTERFD2	130916	10051	Non-CGI	FALSE	TRUE	FALSE
cg14459130	chr2	175199646	175199647	SP9	100131390	-173	CGI	TRUE	FALSE	FALSE
cg14461974	chr2	3318039	3318040	TSSC1	7260	63612	CGI-S-Shore	FALSE	TRUE	FALSE
cg14481208	chr2	74669375	74669376	RTKN	6242	-314	CGI	TRUE	FALSE	FALSE
cg14481911	chr2	242438436	242438437	STK25	10494	10522	CGI	FALSE	TRUE	FALSE
cg14499933	chr2	444769	444770	FAM150B	285016	-156460	CGI	FALSE	FALSE	TRUE
cg14659346	chr2	233246431	233246432	ALPP	250	3082	CGI	FALSE	TRUE	FALSE
cg14673618	chr2	45170322	45170323	SIX3	6496	1284	CGI	FALSE	TRUE	FALSE
cg14701108	chr2	3131293	3131294	TSSC1	7260	250358	CGI-S-Shelf	TRUE	FALSE	FALSE
cg14775296	chr2	66672841	66672842	MEIS1	4211	10308	CGI	FALSE	TRUE	FALSE
cg14780466	chr2	20870812	20870813	GDF7	151449	4387	CGI	FALSE	TRUE	FALSE
cg14793137	chr2	1480944	1480945	TPO	7173	102948	CGI	FALSE	TRUE	FALSE
cg14877896	chr2	74743839	74743840	TLX2	3196	3152	CGI	FALSE	TRUE	FALSE
cg14882311	chr2	42328410	42328411	PKDCC	91461	53248	CGI	FALSE	FALSE	TRUE
cg14900246	chr2	112655153	112655154	MERTK	10461	-1036	CGI	TRUE	FALSE	FALSE
cg14927745	chr2	241562485	241562486	GPR35	2859	17659	CGI	FALSE	TRUE	FALSE
cg14983225	chr2	163879745	163879746	KCNH7	90134	-184487	CGI-N-Shelf	FALSE	FALSE	TRUE
cg15015639	chr2	220282977	220282978	DES	1674	-120	CGI-N-Shore	TRUE	FALSE	FALSE
cg15072976	chr2	242715549	242715550	GAL3ST2	64090	-689	CGI-S-Shore	TRUE	FALSE	FALSE
cg15073784	chr2	105406666	105406667	LOC284998	284998	-32488	Non-CGI	FALSE	FALSE	TRUE
cg15099161	chr2	242710665	242710666	GAL3ST2	64090	-5573	CGI	FALSE	FALSE	TRUE
cg15123692	chr2	23886357	23886358	ATAD2B	54454	263577	CGI	FALSE	TRUE	FALSE
cg15144153	chr2	74663598	74663599	RTKN	6242	5460	CGI	FALSE	TRUE	FALSE
cg15160709	chr2	72357937	72357938	CYP26B1	56603	17024	CGI-N-Shore	FALSE	TRUE	FALSE
cg15162392	chr2	37571729	37571730	QPCT	25797	-22	CGI	TRUE	FALSE	FALSE
cg15262317	chr2	208632832	208632833	FZD5	7855	1309	CGI	TRUE	TRUE	FALSE
cg15326452	chr2	27371820	27371821	TCF23	150921	-123	CGI-N-Shore	TRUE	FALSE	FALSE
cg15341833	chr2	106776775	106776776	UXS1	80146	34018	CGI-N-Shore	FALSE	TRUE	FALSE
cg15371801	chr2	232348684	232348685	NCL	4691	-19478	CGI	FALSE	FALSE	TRUE
cg15375772	chr2	1507694	1507695	TPO	7173	129698	CGI	FALSE	TRUE	FALSE
cg15379170	chr2	233476236	233476237	EFHD1	80303	5468	Non-CGI	FALSE	TRUE	FALSE
cg15442058	chr2	231598059	231598060	CAB39	51719	20501	Non-CGI	FALSE	TRUE	FALSE
cg15454486	chr2	192543810	192543811	NABP1	64859	1011	CGI	TRUE	TRUE	FALSE
cg15506703	chr2	242844601	242844602	CXXC11	285093	32714	CGI	FALSE	FALSE	TRUE
cg15544633	chr2	99771531	99771532	LIPT1	51601	112	CGI	TRUE	TRUE	FALSE
cg15552158	chr2	172953270	172953271	DLX1	1745	3061	CGI	FALSE	TRUE	FALSE
cg15579587	chr2	238600061	238600062	LRRFIP1	9208	63836	CGI	TRUE	TRUE	FALSE
cg15607387	chr2	231714575	231714576	ITM2C	81618	-15044	CGI	FALSE	FALSE	TRUE
cg15714846	chr2	208631684	208631685	FZD5	7855	2457	CGI	FALSE	TRUE	FALSE
cg15732840	chr2	63274615	63274616	LOC100132215	100132215	1039	CGI	TRUE	TRUE	FALSE
cg15742848	chr2	169769501	169769502	G6PC2	57818	11750	Non-CGI	FALSE	FALSE	TRUE
cg15754594	chr2	106184688	106184689	LOC285000	285000	42326	CGI	FALSE	FALSE	TRUE
cg15775218	chr2	3286338	3286339	TSSC1	7260	95313	CGI	FALSE	TRUE	FALSE
cg15775921	chr2	223156136	223156137	CCDC140	151278	-6728	CGI-S-Shore	FALSE	TRUE	FALSE
cg15809077	chr2	112462079	112462080	ANAPC1	64682	179660	Non-CGI	FALSE	FALSE	TRUE
cg15809352	chr2	121748218	121748219	GLI2	2736	255018	CGI-S-Shore	FALSE	TRUE	FALSE
cg15833099	chr2	133402999	133403000	LYPD1	116372	26069	CGI	FALSE	TRUE	FALSE
cg15843262	chr2	25473895	25473896	MIR1301	100302246	77693	CGI	FALSE	TRUE	FALSE
cg15913725	chr2	3286479	3286480	TSSC1	7260	95172	CGI	FALSE	TRUE	FALSE
cg15928392	chr2	81694446	81694447	LRRTM1	347730	-1162958	CGI	FALSE	FALSE	TRUE
cg15981851	chr2	236773924	236773925	GBX2	2637	302726	CGI	FALSE	TRUE	FALSE
cg16151651	chr2	1609119	1609120	PXDN	7837	139170	CGI	FALSE	FALSE	TRUE
cg16155858	chr2	28636031	28636032	FOSL2	2355	20361	Non-CGI	FALSE	TRUE	FALSE
cg16179507	chr2	43295306	43295307	ZFP36L2	678	158437	CGI	FALSE	FALSE	TRUE
cg16240755	chr2	101959078	101959079	RNF149	284996	-33899	CGI	FALSE	FALSE	TRUE
cg16353174	chr2	129543148	129543149	HS6ST1	9394	-466976	CGI	FALSE	FALSE	TRUE
cg16361302	chr2	19561327	19561328	OSR1	130497	-2954	CGI	FALSE	FALSE	TRUE
cg16472050	chr2	172945698	172945699	DLX1	1745	-4508	CGI	FALSE	FALSE	TRUE
cg16580837	chr2	1846750	1846751	PXDN	7837	-98458	CGI	TRUE	TRUE	FALSE
cg16596103	chr2	233749413	233749414	C2orf82	389084	14418	CGI-S-Shore	FALSE	TRUE	FALSE
cg16653700	chr2	1232428	1232429	TPO	7173	-145565	CGI-N-Shore	FALSE	TRUE	FALSE
cg16700364	chr2	157178889	157178890	NR4A2	4929	10396	CGI	FALSE	FALSE	TRUE
cg16703008	chr2	29828479	29828480	ALK	238	315996	Non-CGI	FALSE	TRUE	FALSE
cg16786808	chr2	222434497	222434498	EPHA4	2043	2511	CGI-N-Shore	FALSE	TRUE	FALSE
cg16794506	chr2	119600002	119600003	EN1	2019	5755	CGI	FALSE	TRUE	FALSE
cg16798252	chr2	200334402	200334403	SATB2-AS1	150538	1580	CGI	TRUE	TRUE	FALSE
cg16842767	chr2	88316858	88316859	RGPD1	400966	-31548	CGI	FALSE	FALSE	TRUE
cg16843994	chr2	4704518	4704519	LOC727982	727982	-705	Non-CGI	TRUE	FALSE	FALSE
cg16865953	chr2	66808261	66808262	MEIS1	4211	145728	CGI-N-Shore	FALSE	FALSE	TRUE
cg16877087	chr2	161504834	161504835	RBMS1	5937	-154515	CGI	FALSE	FALSE	TRUE
cg16914890	chr2	242839615	242839616	CXXC11	285093	27728	CGI-N-Shore	FALSE	FALSE	TRUE
cg16987524	chr2	112939425	112939426	FBLN7	129804	43462	CGI	FALSE	TRUE	FALSE
cg17097782	chr2	19551860	19551861	MIR4757	100616307	3669	CGI	FALSE	TRUE	FALSE
cg17137077	chr2	162197875	162197876	PSMD14	10213	33088	CGI	TRUE	TRUE	FALSE
cg17147526	chr2	234072415	234072416	ATG16L1	55054	-87800	Non-CGI	FALSE	TRUE	FALSE
cg17277199	chr2	24397845	24397846	FAM228A	653140	313	CGI	TRUE	TRUE	FALSE
cg17322655	chr2	242802127	242802128	PDCD1	5133	-1068	CGI	TRUE	FALSE	FALSE
cg17376921	chr2	234776807	234776808	MSL3P1	151507	246	CGI	FALSE	TRUE	FALSE
cg17511968	chr2	219721165	219721166	WNT6	7475	-3379	CGI-N-Shelf	FALSE	FALSE	TRUE
cg17518215	chr2	172973241	172973242	DLX2	1746	-5762	CGI	FALSE	FALSE	TRUE
cg17526887	chr2	223918000	223918001	KCNE4	23704	1137	CGI	TRUE	TRUE	FALSE
cg17598339	chr2	170624727	170624728	SSB	6741	-30593	CGI	FALSE	FALSE	TRUE
cg17646392	chr2	237702390	237702391	CXCR7	57007	232965	CGI	FALSE	FALSE	TRUE
cg17676994	chr2	241405196	241405197	PP14571	100130449	-9078	CGI	FALSE	TRUE	FALSE
cg17681516	chr2	43295389	43295390	ZFP36L2	678	158354	CGI	FALSE	FALSE	TRUE
cg17696563	chr2	242756362	242756363	NEU4	129807	6201	CGI	FALSE	TRUE	FALSE
cg17737681	chr2	172952136	172952137	DLX1	1745	1927	CGI	FALSE	TRUE	FALSE
cg17738010	chr2	3452437	3452438	TRAPPC12	51112	68990	CGI	FALSE	TRUE	FALSE
cg17801295	chr2	241640826	241640827	AQP12A	375318	9563	CGI	FALSE	FALSE	TRUE
cg17802633	chr2	68871468	68871469	ARHGAP25	9938	-35276	CGI-S-Shore	TRUE	TRUE	FALSE
cg17818471	chr2	177012640	177012641	MIR10B	406903	-2389	CGI	FALSE	FALSE	TRUE
cg17818613	chr2	97527586	97527587	ANKRD39	51239	-3829	CGI	TRUE	TRUE	FALSE
cg17851061	chr2	11758591	11758592	NTSR2	23620	51736	CGI	FALSE	TRUE	FALSE
cg17851725	chr2	121269372	121269373	LOC84931	84931	-45446	Non-CGI	FALSE	FALSE	TRUE
cg17872886	chr2	3642732	3642733	COLEC11	78989	94	CGI	TRUE	FALSE	FALSE
cg17918270	chr2	1983484	1983485	PXDN	7837	-235192	CGI	FALSE	TRUE	FALSE
cg17939889	chr2	240174650	240174651	MIR4269	100423043	-52505	CGI	FALSE	TRUE	FALSE
cg17962090	chr2	127728910	127728911	BIN1	274	135991	CGI	FALSE	FALSE	TRUE
cg18093372	chr2	119607603	119607604	EN1	2019	-1843	CGI	TRUE	FALSE	FALSE
cg18110444	chr2	136743460	136743461	DARS	1615	-237	CGI	TRUE	FALSE	FALSE
cg18111139	chr2	223171052	223171053	PAX3	5077	-7336	CGI	FALSE	FALSE	TRUE
cg18115040	chr2	176981328	176981329	HOXD10	3236	-162	CGI	TRUE	FALSE	FALSE
cg18173235	chr2	119612382	119612383	EN1	2019	-6622	CGI	FALSE	FALSE	TRUE
cg18183163	chr2	171574141	171574142	SP5	389058	2283	CGI	FALSE	TRUE	FALSE
cg18278899	chr2	242606122	242606123	DTYMK	1841	20259	CGI	TRUE	TRUE	FALSE
cg18406033	chr2	223159869	223159870	CCDC140	151278	-2995	CGI	FALSE	TRUE	FALSE
cg18448949	chr2	176993089	176993090	HOXD8	3234	-1331	CGI	TRUE	FALSE	FALSE
cg18476766	chr2	240529742	240529743	LOC150935	150935	-154810	CGI-N-Shore	FALSE	FALSE	TRUE
cg18527574	chr2	222434303	222434304	EPHA4	2043	2705	CGI-N-Shore	FALSE	TRUE	FALSE
cg18549688	chr2	236299625	236299626	AGAP1	116987	-103106	CGI-N-Shore	FALSE	FALSE	TRUE
cg18587476	chr2	24397810	24397811	FAM228A	653140	278	CGI	TRUE	TRUE	FALSE
cg18623980	chr2	45240563	45240564	SIX2	10736	-4020	CGI	FALSE	FALSE	TRUE
cg18666930	chr2	3658894	3658895	COLEC11	78989	16256	CGI	FALSE	TRUE	FALSE
cg18669186	chr2	119614594	119614595	EN1	2019	-8834	CGI	FALSE	FALSE	TRUE
cg18703066	chr2	105363536	105363537	LOC284998	284998	10639	CGI	FALSE	TRUE	FALSE
cg18744355	chr2	1906949	1906950	PXDN	7837	-158657	Non-CGI	FALSE	TRUE	FALSE
cg18760534	chr2	2964910	2964911	TSSC1	7260	416741	CGI	FALSE	TRUE	FALSE
cg18762036	chr2	107872062	107872063	ST6GAL2	84620	-368498	CGI	FALSE	FALSE	TRUE
cg18954144	chr2	5896473	5896474	SOX11	6664	63673	Non-CGI	FALSE	FALSE	TRUE
cg18959907	chr2	54517309	54517310	TSPYL6	388951	-33899	Non-CGI	FALSE	TRUE	FALSE
cg18969008	chr2	10445016	10445017	HPCAL1	3241	1975	CGI	FALSE	TRUE	FALSE
cg19006220	chr2	4050719	4050720	LOC100505964	100505964	-29096	CGI	FALSE	FALSE	TRUE
cg19044706	chr2	241829685	241829686	C2orf54	79919	5886	CGI-S-Shore	FALSE	TRUE	FALSE
cg19051213	chr2	128281334	128281335	IWS1	55677	2751	CGI-N-Shelf	FALSE	TRUE	FALSE
cg19187155	chr2	232395269	232395270	NMUR1	10316	-86	CGI	TRUE	FALSE	FALSE
cg19224201	chr2	119615015	119615016	EN1	2019	-9255	CGI	FALSE	FALSE	TRUE
cg19273694	chr2	24233923	24233924	MFSD2B	388931	969	CGI	TRUE	TRUE	FALSE
cg19372063	chr2	11118387	11118388	KCNF1	3754	66323	CGI	FALSE	FALSE	TRUE
cg19407717	chr2	1544120	1544121	TPO	7173	166124	CGI	FALSE	TRUE	FALSE
cg19432688	chr2	1763410	1763411	PXDN	7837	-15118	CGI	FALSE	FALSE	TRUE
cg19506623	chr2	161265259	161265260	MIR4785	100616364	-865	CGI-S-Shore	TRUE	TRUE	FALSE
cg19506677	chr2	242878672	242878673	CXXC11	285093	66785	CGI	FALSE	FALSE	TRUE
cg19509393	chr2	177016490	177016491	HOXD4	3233	376	CGI	TRUE	FALSE	FALSE
cg19519747	chr2	177014555	177014556	MIR10B	406903	-474	CGI	TRUE	FALSE	FALSE
cg19534681	chr2	134785761	134785762	MIR3679	100500878	-98933	CGI	FALSE	FALSE	TRUE
cg19542849	chr2	100217960	100217961	REV1	51455	-111479	Non-CGI	FALSE	TRUE	FALSE
cg19581790	chr2	222644621	222644622	EPHA4	2043	-207610	Non-CGI	FALSE	FALSE	TRUE
cg19592277	chr2	54086854	54086855	GPR75	10936	314	CGI	FALSE	TRUE	FALSE
cg19656282	chr2	74742786	74742787	TLX2	3196	2099	CGI	FALSE	TRUE	FALSE
cg19707128	chr2	127635279	127635280	GYPC	2995	221594	CGI-N-Shore	FALSE	FALSE	TRUE
cg19714279	chr2	237077920	237077921	GBX2	2637	-1267	CGI-S-Shore	TRUE	FALSE	FALSE
cg19757382	chr2	241076313	241076314	MYEOV2	150678	-548	CGI	TRUE	FALSE	FALSE
cg19825600	chr2	3704501	3704502	ALLC	55821	-1283	CGI-N-Shore	TRUE	FALSE	FALSE
cg19865525	chr2	228029856	228029857	COL4A3	1285	574	CGI-S-Shore	TRUE	TRUE	FALSE
cg19867917	chr2	3642629	3642630	COLEC11	78989	-6	CGI	TRUE	FALSE	FALSE
cg19878627	chr2	54087184	54087185	GPR75	10936	-13	CGI	TRUE	FALSE	FALSE
cg19907479	chr2	3063476	3063477	TSSC1	7260	318175	CGI	FALSE	TRUE	FALSE
cg19911430	chr2	16430654	16430655	MYCNOS	10408	-348808	Non-CGI	FALSE	FALSE	TRUE
cg19916659	chr2	179387931	179387932	TTN-AS1	100506866	376	CGI	TRUE	TRUE	FALSE
cg19964303	chr2	220080850	220080851	ABCB6	10058	4322	CGI-N-Shelf	FALSE	TRUE	FALSE
cg19988482	chr2	394572	394573	FAM150B	285016	-106263	CGI	FALSE	FALSE	TRUE
cg19997179	chr2	620310	620311	TMEM18	129787	57127	CGI	FALSE	FALSE	TRUE
cg20011983	chr2	74347215	74347216	BOLA3	388962	27822	CGI-N-Shore	FALSE	FALSE	TRUE
cg20094506	chr2	241405084	241405085	PP14571	100130449	-8966	CGI	FALSE	TRUE	FALSE
cg20139706	chr2	237068750	237068751	GBX2	2637	7900	CGI	FALSE	FALSE	TRUE
cg20201270	chr2	45397874	45397875	UNQ6975	400952	84204	CGI	FALSE	FALSE	TRUE
cg20202112	chr2	74601685	74601686	SLC4A5	57835	-11130	Non-CGI	TRUE	TRUE	FALSE
cg20333904	chr2	240724165	240724166	LOC150935	150935	39610	CGI	FALSE	FALSE	TRUE
cg20348298	chr2	3193239	3193240	TSSC1	7260	188412	CGI	FALSE	TRUE	FALSE
cg20388707	chr2	233749442	233749443	C2orf82	389084	14447	CGI-S-Shore	FALSE	TRUE	FALSE
cg20391058	chr2	2295451	2295452	LOC730811	730811	-27551	CGI	FALSE	TRUE	FALSE
cg20428033	chr2	241562584	241562585	GPR35	2859	17758	CGI	FALSE	TRUE	FALSE
cg20499506	chr2	3173204	3173205	TSSC1	7260	208447	CGI-N-Shore	FALSE	FALSE	TRUE
cg20509869	chr2	220375605	220375606	ASIC4	55515	-3285	CGI-N-Shelf	FALSE	FALSE	TRUE
cg20512947	chr2	242889340	242889341	CXXC11	285093	77453	CGI	FALSE	FALSE	TRUE
cg20563269	chr2	129104576	129104577	HS6ST1	9394	-28404	CGI	FALSE	FALSE	TRUE
cg20698421	chr2	65217623	65217624	SLC1A4	6509	2043	CGI	FALSE	TRUE	FALSE
cg20702390	chr2	18766018	18766019	NT5C1B-RDH14	100526794	4826	CGI	TRUE	TRUE	FALSE
cg20722637	chr2	237542662	237542663	CXCR7	57007	73237	Non-CGI	FALSE	FALSE	TRUE
cg20785796	chr2	200326721	200326722	SATB2-AS1	150538	-6098	CGI	FALSE	TRUE	FALSE
cg20793665	chr2	232549224	232549225	PTMA	5757	-24009	CGI-S-Shelf	FALSE	FALSE	TRUE
cg20805133	chr2	242802192	242802193	PDCD1	5133	-1133	CGI-S-Shore	TRUE	FALSE	FALSE
cg20812153	chr2	164965951	164965952	FIGN	55137	-373437	CGI-S-Shore	FALSE	FALSE	TRUE
cg20824635	chr2	778731	778732	LOC339822	339822	85379	CGI-S-Shore	FALSE	FALSE	TRUE
cg20986935	chr2	6912382	6912383	LINC00487	400941	-1939	CGI-N-Shore	TRUE	FALSE	FALSE
cg21032567	chr2	795935	795936	LOC339822	339822	68175	CGI	FALSE	TRUE	FALSE
cg21119375	chr2	44393385	44393386	PPM1B	5495	-2613	CGI-N-Shore	FALSE	FALSE	TRUE
cg21124375	chr2	232765392	232765393	MIR1471	100302126	-8383	Non-CGI	FALSE	FALSE	TRUE
cg21270243	chr2	216176248	216176249	ATIC	471	-429	CGI-N-Shore	TRUE	FALSE	FALSE
cg21300993	chr2	237123218	237123219	GBX2	2637	-46565	CGI	FALSE	TRUE	FALSE
cg21463349	chr2	119600948	119600949	EN1	2019	4809	CGI	FALSE	TRUE	FALSE
cg21516302	chr2	131085498	131085499	CCDC115	84317	14422	CGI	FALSE	FALSE	TRUE
cg21519781	chr2	88849576	88849577	TEX37	200523	25406	CGI	FALSE	FALSE	TRUE
cg21531689	chr2	220253653	220253654	DNPEP	23549	11074	CGI-S-Shore	TRUE	TRUE	FALSE
cg21531908	chr2	109789810	109789811	MIR4265	100422863	-31765	CGI-S-Shore	FALSE	TRUE	FALSE
cg21550016	chr2	113992930	113992931	LOC654433	654433	-175	CGI	TRUE	TRUE	FALSE
cg21568106	chr2	66805366	66805367	MEIS1	4211	142833	CGI	FALSE	FALSE	TRUE
cg21570020	chr2	242758118	242758119	NEU4	129807	7957	CGI	FALSE	TRUE	FALSE
cg21610815	chr2	113994035	113994036	LOC654433	654433	927	CGI	TRUE	TRUE	FALSE
cg21665557	chr2	220427342	220427343	OBSL1	23363	8924	CGI	TRUE	TRUE	FALSE
cg21673812	chr2	242955404	242955405	LOC728323	728323	-75438	CGI	FALSE	FALSE	TRUE
cg21728844	chr2	233749736	233749737	C2orf82	389084	14741	CGI-S-Shore	FALSE	TRUE	FALSE
cg21748138	chr2	174251551	174251552	CDCA7	83879	31989	Non-CGI	FALSE	FALSE	TRUE
cg21759953	chr2	121748257	121748258	GLI2	2736	255057	CGI-S-Shore	FALSE	TRUE	FALSE
cg21856256	chr2	121200690	121200691	LOC84931	84931	23233	CGI	FALSE	FALSE	TRUE
cg21875802	chr2	45231382	45231383	SIX2	10736	5158	CGI	FALSE	FALSE	TRUE
cg21901277	chr2	132152297	132152298	LOC389043	389043	-8175	CGI	FALSE	FALSE	TRUE
cg22052672	chr2	74663416	74663417	RTKN	6242	5642	CGI	FALSE	TRUE	FALSE
cg22062537	chr2	241076198	241076199	MYEOV2	150678	-433	CGI	TRUE	FALSE	FALSE
cg22070462	chr2	26395155	26395156	GAREML	150946	-803	CGI	TRUE	FALSE	FALSE
cg22097599	chr2	70934701	70934702	ADD2	119	60672	CGI-S-Shore	FALSE	TRUE	FALSE
cg22116328	chr2	240868565	240868566	MIR4786	100616417	13944	CGI	FALSE	FALSE	TRUE
cg22129545	chr2	27531320	27531321	UCN	7349	-189	CGI	TRUE	FALSE	FALSE
cg22157099	chr2	15830172	15830173	DDX1	1653	98401	Non-CGI	TRUE	FALSE	FALSE
cg22199969	chr2	233323840	233323841	ALPI	248	3006	CGI	FALSE	TRUE	FALSE
cg22242842	chr2	85167149	85167150	KCMF1	56888	-31080	Non-CGI	FALSE	FALSE	TRUE
cg22344703	chr2	219736312	219736313	WNT10A	80326	-8941	CGI	FALSE	TRUE	FALSE
cg22350835	chr2	1868857	1868858	PXDN	7837	-120565	Non-CGI	FALSE	TRUE	FALSE
cg22365240	chr2	105374995	105374996	LOC284998	284998	-817	Non-CGI	TRUE	FALSE	FALSE
cg22387781	chr2	11636031	11636032	E2F6	1876	-29733	CGI	FALSE	FALSE	TRUE
cg22400015	chr2	220196714	220196715	RESP18	389075	1183	CGI	TRUE	TRUE	FALSE
cg22496339	chr2	162101262	162101263	PSMD14	10213	-63522	CGI	TRUE	FALSE	FALSE
cg22511877	chr2	1942942	1942943	PXDN	7837	-194650	CGI-S-Shore	FALSE	TRUE	FALSE
cg22573528	chr2	51254170	51254171	NRXN1	9378	5502	CGI-N-Shore	FALSE	TRUE	FALSE
cg22595460	chr2	119617128	119617129	EN1	2019	-11368	CGI-S-Shore	FALSE	FALSE	TRUE
cg22618405	chr2	86038802	86038803	LOC284950	284950	-3449	CGI-S-Shore	FALSE	FALSE	TRUE
cg22635676	chr2	241975971	241975972	SNED1	25992	37715	CGI	FALSE	TRUE	FALSE
cg22677715	chr2	162284644	162284645	TBR1	10716	12023	CGI	FALSE	FALSE	TRUE
cg22745354	chr2	928720	928721	SNTG2	54221	-17832	CGI	FALSE	FALSE	TRUE
cg22755142	chr2	16243377	16243378	MYCNOS	10408	-161531	Non-CGI	FALSE	FALSE	TRUE
cg22761176	chr2	173539542	173539543	RAPGEF4	11069	-60981	CGI	FALSE	FALSE	TRUE
cg22854985	chr2	174082101	174082102	MLK7-AS1	339751	64661	CGI	FALSE	TRUE	FALSE
cg22856324	chr2	72371255	72371256	CYP26B1	56603	3706	CGI	TRUE	TRUE	FALSE
cg22878388	chr2	105853796	105853797	GPR45	11250	-4402	CGI	FALSE	FALSE	TRUE
cg22879834	chr2	239169591	239169592	HES6	55502	-20909	Non-CGI	FALSE	TRUE	FALSE
cg22880770	chr2	97166341	97166342	NEURL3	93082	7503	CGI	FALSE	TRUE	FALSE
cg22884656	chr2	45157296	45157297	SIX3	6496	-11739	CGI	FALSE	FALSE	TRUE
cg22920501	chr2	26401640	26401641	GAREML	150946	5679	CGI-N-Shore	TRUE	TRUE	FALSE
cg22979783	chr2	72371261	72371262	CYP26B1	56603	3700	CGI	TRUE	TRUE	FALSE
cg23005797	chr2	10302462	10302463	C2orf48	348738	20480	Non-CGI	FALSE	TRUE	FALSE
cg23046231	chr2	201342582	201342583	KCTD18	130535	32208	CGI	FALSE	TRUE	FALSE
cg23056539	chr2	242977619	242977620	LOC728323	728323	-53223	CGI	FALSE	FALSE	TRUE
cg23062198	chr2	14774063	14774064	FAM84A	151354	1252	CGI	TRUE	TRUE	FALSE
cg23136742	chr2	26950956	26950957	KCNK3	3777	35374	CGI	FALSE	TRUE	FALSE
cg23151000	chr2	38302892	38302893	CYP1B1	1545	429	CGI	FALSE	TRUE	FALSE
cg23194912	chr2	3934048	3934049	LOC100505964	100505964	87572	Non-CGI	FALSE	FALSE	TRUE
cg23210278	chr2	220439623	220439624	INHA	3623	2668	CGI-S-Shelf	FALSE	TRUE	FALSE
cg23262213	chr2	172653274	172653275	SLC25A12	8604	97537	Non-CGI	FALSE	TRUE	FALSE
cg23279522	chr2	66659348	66659349	MEIS1	4211	-3182	CGI	FALSE	FALSE	TRUE
cg23325963	chr2	45160093	45160094	SIX3	6496	-8942	CGI	FALSE	FALSE	TRUE
cg23348270	chr2	176969612	176969613	HOXD11	3237	361	CGI	FALSE	TRUE	FALSE
cg23404877	chr2	85553759	85553760	TGOLN2	10618	1658	CGI	FALSE	TRUE	FALSE
cg23405152	chr2	121279886	121279887	LOC84931	84931	-55960	CGI	FALSE	FALSE	TRUE
cg23456409	chr2	120436430	120436431	TMEM177	80775	-311	CGI-N-Shore	TRUE	FALSE	FALSE
cg23491743	chr2	241989271	241989272	SNED1	25992	51015	CGI	FALSE	TRUE	FALSE
cg23536372	chr2	80136875	80136876	MIR4264	100422888	-260389	Non-CGI	FALSE	TRUE	FALSE
cg23546474	chr2	223163033	223163034	CCDC140	151278	166	CGI	TRUE	TRUE	FALSE
cg23557906	chr2	467112	467113	FAM150B	285016	-178803	CGI	FALSE	FALSE	TRUE
cg23649088	chr2	200775458	200775459	C2orf69	205327	-519	CGI-N-Shore	TRUE	FALSE	FALSE
cg23677712	chr2	9617768	9617769	IAH1	285148	3097	CGI-S-Shelf	FALSE	TRUE	FALSE
cg23681687	chr2	130636142	130636143	LOC389033	389033	55746	CGI-S-Shore	FALSE	FALSE	TRUE
cg23681745	chr2	202004875	202004876	CFLAR-AS1	65072	17638	CGI	TRUE	TRUE	FALSE
cg23718924	chr2	60778617	60778618	BCL11A	53335	2014	CGI	FALSE	TRUE	FALSE
cg23780110	chr2	26045244	26045245	ASXL2	55252	56066	CGI	FALSE	TRUE	FALSE
cg23875171	chr2	109622566	109622567	EDAR	10913	-16737	Non-CGI	FALSE	FALSE	TRUE
cg23899450	chr2	242787324	242787325	PDCD1	5133	13732	CGI	FALSE	FALSE	TRUE
cg23924370	chr2	88583805	88583806	THNSL2	55258	113990	CGI	FALSE	FALSE	TRUE
cg23940612	chr2	218898788	218898789	RUFY4	285180	-867	CGI	TRUE	FALSE	FALSE
cg23994043	chr2	200326725	200326726	SATB2-AS1	150538	-6094	CGI	FALSE	TRUE	FALSE
cg24133207	chr2	241395351	241395352	MIR149	406941	-65	CGI	TRUE	TRUE	FALSE
cg24152976	chr2	236100696	236100697	SH3BP4	23677	240067	Non-CGI	FALSE	FALSE	TRUE
cg24201793	chr2	9144764	9144765	MBOAT2	129642	-887	CGI-S-Shore	TRUE	FALSE	FALSE
cg24215159	chr2	4050695	4050696	LOC100505964	100505964	-29072	CGI	FALSE	FALSE	TRUE
cg24269074	chr2	119614489	119614490	EN1	2019	-8729	CGI	FALSE	FALSE	TRUE
cg24345062	chr2	200334439	200334440	SATB2	23314	1548	CGI	TRUE	TRUE	FALSE
cg24367840	chr2	162197869	162197870	PSMD14	10213	33082	CGI	TRUE	TRUE	FALSE
cg24399924	chr2	85980533	85980534	ATOH8	84913	-374	CGI	TRUE	FALSE	FALSE
cg24419520	chr2	106959257	106959258	PLGLA	285189	-43510	CGI	FALSE	FALSE	TRUE
cg24428372	chr2	314850	314851	FAM150B	285016	-26541	CGI	FALSE	FALSE	TRUE
cg24516106	chr2	72079413	72079414	CYP26B1	56603	295548	CGI-N-Shore	FALSE	FALSE	TRUE
cg24654266	chr2	115420053	115420054	DPP10	57628	220153	CGI	FALSE	TRUE	FALSE
cg24655222	chr2	27601647	27601648	ZNF513	130557	1962	CGI	FALSE	TRUE	FALSE
cg24673771	chr2	45180267	45180268	SIX3	6496	11229	CGI	FALSE	FALSE	TRUE
cg24741066	chr2	1656557	1656558	PXDN	7837	91732	CGI-S-Shelf	FALSE	TRUE	FALSE
cg24742614	chr2	223917590	223917591	KCNE4	23704	727	CGI-S-Shore	TRUE	TRUE	FALSE
cg24766821	chr2	186603639	186603640	FSIP2	401024	283	CGI	TRUE	FALSE	FALSE
cg24879782	chr2	19561482	19561483	OSR1	130497	-3109	CGI	FALSE	FALSE	TRUE
cg24887265	chr2	45233528	45233529	SIX2	10736	3012	CGI	FALSE	TRUE	FALSE
cg24919768	chr2	110873031	110873032	MALL	7851	1110	CGI	FALSE	TRUE	FALSE
cg25012185	chr2	225890792	225890793	MIR4439	100616207	-15534	Non-CGI	FALSE	TRUE	FALSE
cg25101898	chr2	236866987	236866988	GBX2	2637	209663	CGI-N-Shore	FALSE	TRUE	FALSE
cg25137403	chr2	177022172	177022173	HOXD4	3233	6058	CGI	FALSE	FALSE	TRUE
cg25138484	chr2	233242758	233242759	ALPP	250	-588	CGI-N-Shore	TRUE	FALSE	FALSE
cg25168494	chr2	63286355	63286356	OTX1	5013	9162	CGI	FALSE	FALSE	TRUE
cg25241559	chr2	241989379	241989380	SNED1	25992	51123	CGI	FALSE	TRUE	FALSE
cg25243455	chr2	114033360	114033361	PAX8	7849	3136	CGI-N-Shore	FALSE	TRUE	FALSE
cg25298319	chr2	233217079	233217080	ALPP	250	-26267	CGI	FALSE	FALSE	TRUE
cg25334934	chr2	121269348	121269349	LOC84931	84931	-45422	Non-CGI	FALSE	FALSE	TRUE
cg25353287	chr2	42277667	42277668	PKDCC	91461	2505	CGI-S-Shore	FALSE	TRUE	FALSE
cg25365544	chr2	238707589	238707590	RBM44	375316	200	CGI	FALSE	TRUE	FALSE
cg25393284	chr2	942653	942654	SNTG2	54221	-3899	CGI-N-Shelf	FALSE	FALSE	TRUE
cg25428553	chr2	105275706	105275707	LOC284998	284998	98469	CGI	FALSE	FALSE	TRUE
cg25428929	chr2	242606353	242606354	DTYMK	1841	20028	CGI	TRUE	TRUE	FALSE
cg25517810	chr2	105474385	105474386	POU3F3	5455	2415	CGI	FALSE	FALSE	TRUE
cg25534953	chr2	97174206	97174207	NEURL3	93082	-359	CGI	TRUE	FALSE	FALSE
cg25596297	chr2	223162875	223162876	CCDC140	151278	8	CGI-S-Shore	TRUE	TRUE	FALSE
cg25705148	chr2	72079498	72079499	CYP26B1	56603	295463	CGI	FALSE	FALSE	TRUE
cg25730564	chr2	236100751	236100752	SH3BP4	23677	240122	Non-CGI	FALSE	FALSE	TRUE
cg25740565	chr2	200335101	200335102	SATB2	23314	886	CGI	TRUE	TRUE	FALSE
cg25756780	chr2	121345047	121345048	LOC84931	84931	-121121	CGI	FALSE	FALSE	TRUE
cg25800500	chr2	97505275	97505276	ANKRD23	200539	4481	CGI-N-Shore	FALSE	TRUE	FALSE
cg25803107	chr2	6072744	6072745	LOC150622	150622	-73	Non-CGI	TRUE	FALSE	FALSE
cg25815024	chr2	219696567	219696568	PRKAG3	53632	-54	Non-CGI	TRUE	FALSE	FALSE
cg25916282	chr2	177023760	177023761	HOXD3	3232	-5043	CGI	FALSE	FALSE	TRUE
cg25950668	chr2	97530653	97530654	SEMA4C	54910	5080	CGI-S-Shelf	TRUE	TRUE	FALSE
cg25951210	chr2	177016619	177016620	HOXD4	3233	505	CGI	TRUE	FALSE	FALSE
cg25953239	chr2	176982342	176982343	HOXD10	3236	849	CGI	FALSE	TRUE	FALSE
cg25976672	chr2	235907796	235907797	SH3BP4	23677	47167	CGI	FALSE	TRUE	FALSE
cg26009192	chr2	120282200	120282201	SCTR	6344	-171	CGI	TRUE	FALSE	FALSE
cg26032417	chr2	241185226	241185227	OTOS	150677	-105152	CGI	FALSE	FALSE	TRUE
cg26053291	chr2	89064631	89064632	ANKRD36BP2	645784	-786	CGI	TRUE	FALSE	FALSE
cg26058474	chr2	241975035	241975036	SNED1	25992	36779	CGI	FALSE	TRUE	FALSE
cg26091021	chr2	177021826	177021827	HOXD4	3233	5712	CGI	FALSE	FALSE	TRUE
cg26092233	chr2	240697636	240697637	LOC150935	150935	13081	CGI	FALSE	TRUE	FALSE
cg26097391	chr2	54893211	54893212	EML6	400954	-58936	Non-CGI	FALSE	TRUE	FALSE
cg26132947	chr2	242933431	242933432	LOC728323	728323	-97411	CGI-N-Shore	FALSE	FALSE	TRUE
cg26154534	chr2	241076355	241076356	MYEOV2	150678	-590	CGI	TRUE	FALSE	FALSE
cg26267388	chr2	119591627	119591628	EN1	2019	14130	CGI	FALSE	FALSE	TRUE
cg26307926	chr2	71116765	71116766	VAX2	25806	-10953	CGI	FALSE	FALSE	TRUE
cg26317006	chr2	240428290	240428291	HDAC4	9759	-104943	CGI	FALSE	FALSE	TRUE
cg26344334	chr2	3718215	3718216	ALLC	55821	12428	CGI-S-Shelf	FALSE	TRUE	FALSE
cg26348348	chr2	133428993	133428994	LYPD1	116372	75	CGI-S-Shore	TRUE	FALSE	FALSE
cg26381970	chr2	241326952	241326953	GPC1	2817	-48161	CGI	FALSE	FALSE	TRUE
cg26383138	chr2	2119533	2119534	LOC730811	730811	-203469	CGI	FALSE	TRUE	FALSE
cg26385097	chr2	438095	438096	FAM150B	285016	-149786	CGI-N-Shore	FALSE	FALSE	TRUE
cg26396721	chr2	214171	214172	SH3YL1	26751	50637	CGI	FALSE	FALSE	TRUE
cg26447282	chr2	242874971	242874972	CXXC11	285093	63084	CGI	FALSE	FALSE	TRUE
cg26471497	chr2	172974819	172974820	DLX2	1746	-7340	CGI	FALSE	FALSE	TRUE
cg26474549	chr2	239432273	239432274	LOC151171	151171	31865	CGI	FALSE	TRUE	FALSE
cg26502666	chr2	29034052	29034053	SPDYA	245711	28668	CGI	FALSE	TRUE	FALSE
cg26533925	chr2	10384276	10384277	MIR4261	100422929	-51478	CGI	FALSE	FALSE	TRUE
cg26580609	chr2	18766140	18766141	NT5C1B-RDH14	100526794	4704	CGI	TRUE	TRUE	FALSE
cg26631984	chr2	17719375	17719376	VSNL1	7447	-2430	CGI-N-Shore	FALSE	FALSE	TRUE
cg26638005	chr2	131090049	131090050	CCDC115	84317	9871	CGI	FALSE	FALSE	TRUE
cg26638505	chr2	31806183	31806184	SRD5A2	6716	-142	CGI	TRUE	FALSE	FALSE
cg26669897	chr2	15909070	15909071	MYCN	4613	-171611	Non-CGI	FALSE	FALSE	TRUE
cg26700716	chr2	183730940	183730941	FRZB	2487	556	CGI	TRUE	FALSE	FALSE
cg26817877	chr2	173539621	173539622	RAPGEF4	11069	-60902	CGI	FALSE	FALSE	TRUE
cg26990102	chr2	119606746	119606747	EN1	2019	-986	CGI	TRUE	FALSE	FALSE
cg27091865	chr2	3826610	3826611	ALLC	55821	120823	CGI-N-Shore	FALSE	FALSE	TRUE
cg27104778	chr2	237542706	237542707	CXCR7	57007	73281	Non-CGI	FALSE	FALSE	TRUE
cg27107076	chr2	25050844	25050845	PTRHD1	391356	-34592	CGI	FALSE	TRUE	FALSE
cg27109600	chr2	200332025	200332026	SATB2-AS1	150538	-794	CGI-N-Shore	TRUE	TRUE	FALSE
cg27254040	chr2	51074881	51074882	NRXN1	9378	184791	Non-CGI	FALSE	TRUE	FALSE
cg27274377	chr2	1863615	1863616	PXDN	7837	-115323	CGI-N-Shore	FALSE	TRUE	FALSE
cg27344587	chr2	63275602	63275603	LOC100132215	100132215	52	CGI	TRUE	FALSE	FALSE
cg27364741	chr2	63281069	63281070	OTX1	5013	3876	CGI	TRUE	TRUE	FALSE
cg27404023	chr2	162283994	162283995	TBR1	10716	11373	CGI	FALSE	FALSE	TRUE
cg27406975	chr2	172955512	172955513	DLX1	1745	5303	CGI	FALSE	FALSE	TRUE
cg27485108	chr2	26951130	26951131	KCNK3	3777	35548	CGI	FALSE	TRUE	FALSE
cg27553988	chr2	1266573	1266574	TPO	7173	-111420	CGI	FALSE	TRUE	FALSE
cg27585222	chr2	114737730	114737731	LOC100499194	100499194	-168	CGI	TRUE	TRUE	FALSE
cg00028935	chr3	147114406	147114407	ZIC4	84107	10188	CGI	TRUE	TRUE	FALSE
cg00030422	chr3	38080704	38080705	DLEC1	9940	7	CGI	TRUE	FALSE	FALSE
cg00071984	chr3	60617504	60617505	FHIT	2272	619627	Non-CGI	FALSE	TRUE	FALSE
cg00166722	chr3	10149974	10149975	FANCD2OS	115795	-58	CGI	TRUE	FALSE	FALSE
cg00186462	chr3	100401284	100401285	TFG	10342	-26848	CGI	FALSE	TRUE	FALSE
cg00193283	chr3	10806047	10806048	LINC00606	285370	-169	Non-CGI	TRUE	FALSE	FALSE
cg00332802	chr3	118198779	118198780	IGSF11	152404	666117	Non-CGI	FALSE	FALSE	TRUE
cg00334063	chr3	147106010	147106011	ZIC4	84107	18584	CGI-N-Shore	FALSE	TRUE	FALSE
cg00345443	chr3	54121778	54121779	CACNA2D3	55799	-34913	CGI	FALSE	FALSE	TRUE
cg00804179	chr3	13083974	13083975	IQSEC1	9922	30641	CGI-S-Shore	FALSE	TRUE	FALSE
cg00817731	chr3	46759475	46759476	TMIE	259236	16651	CGI	TRUE	TRUE	FALSE
cg00893348	chr3	139353025	139353026	NMNAT3	349565	43858	CGI	FALSE	TRUE	FALSE
cg00907008	chr3	350892	350893	CHL1	10752	112612	CGI	FALSE	TRUE	FALSE
cg00969119	chr3	13325360	13325361	NUP210	23225	136447	CGI-S-Shore	FALSE	FALSE	TRUE
cg01025398	chr3	71833878	71833879	PROK2	60675	477	CGI	FALSE	TRUE	FALSE
cg01026256	chr3	183959088	183959089	MIR1224	100187716	-103	CGI-N-Shore	TRUE	TRUE	FALSE
cg01056889	chr3	27411030	27411031	NEK10	152110	-117	CGI	TRUE	FALSE	FALSE
cg01083380	chr3	168863860	168863861	MECOM	2122	517701	CGI-N-Shore	TRUE	TRUE	FALSE
cg01102073	chr3	128204813	128204814	GATA2	2624	7215	CGI-N-Shore	FALSE	TRUE	FALSE
cg01115389	chr3	194706051	194706052	LOC100507391	100507391	276900	CGI	FALSE	FALSE	TRUE
cg01370384	chr3	184053526	184053527	FAM131A	131408	-189	CGI-N-Shore	TRUE	FALSE	FALSE
cg01379240	chr3	138666144	138666145	C3orf72	401089	67	CGI	TRUE	FALSE	FALSE
cg01448562	chr3	133502909	133502910	SRPRB	58477	31	CGI	TRUE	FALSE	FALSE
cg01518889	chr3	128202493	128202494	GATA2	2624	9535	CGI	FALSE	TRUE	FALSE
cg01571001	chr3	128215433	128215434	GATA2	2624	-3402	CGI	FALSE	FALSE	TRUE
cg01788113	chr3	46759472	46759473	TMIE	259236	16648	CGI	TRUE	TRUE	FALSE
cg01797371	chr3	195578240	195578241	MUC4	4585	-39395	CGI-S-Shore	FALSE	FALSE	TRUE
cg01825295	chr3	147131617	147131618	ZIC1	7545	4435	CGI-S-Shore	FALSE	TRUE	FALSE
cg01857819	chr3	126711260	126711261	PLXNA1	5361	3822	CGI-S-Shelf	FALSE	TRUE	FALSE
cg01896761	chr3	13590444	13590445	FBLN2	2199	16619	CGI-N-Shore	TRUE	TRUE	FALSE
cg01911613	chr3	196325238	196325239	FBXO45	200933	29512	CGI	FALSE	FALSE	TRUE
cg01951420	chr3	121553821	121553822	IQCB1	9657	103	CGI	TRUE	FALSE	FALSE
cg01996116	chr3	42846907	42846908	CCBP2	1238	660	CGI-S-Shore	TRUE	TRUE	FALSE
cg02081052	chr3	147137327	147137328	ZIC1	7545	10145	CGI	FALSE	FALSE	TRUE
cg02253760	chr3	147077616	147077617	ZIC4	84107	46978	CGI-S-Shore	FALSE	FALSE	TRUE
cg02336104	chr3	71481486	71481487	MIR1284	100302112	109752	Non-CGI	FALSE	TRUE	FALSE
cg02352281	chr3	46139305	46139306	CCR3	1232	-65789	Non-CGI	FALSE	FALSE	TRUE
cg02387803	chr3	147123457	147123458	ZIC4	84107	1137	CGI-N-Shore	TRUE	TRUE	FALSE
cg02470871	chr3	119278637	119278638	CD80	941	-155	Non-CGI	TRUE	FALSE	FALSE
cg02524983	chr3	188012918	188012919	FLJ42393	401105	116586	Non-CGI	FALSE	TRUE	FALSE
cg02573703	chr3	181428547	181428548	SOX2	6657	-1163	CGI	TRUE	TRUE	FALSE
cg02577896	chr3	133174687	133174688	BFSP2	8419	55896	Non-CGI	TRUE	TRUE	FALSE
cg02611507	chr3	148804746	148804747	HLTF	6596	-404	CGI	TRUE	FALSE	FALSE
cg02641517	chr3	54169983	54169984	CACNA2D3	55799	13289	Non-CGI	FALSE	TRUE	FALSE
cg02647941	chr3	147127143	147127144	ZIC1	7545	-36	CGI	TRUE	FALSE	FALSE
cg02782426	chr3	40428986	40428987	ENTPD3	956	312	CGI	FALSE	TRUE	FALSE
cg02803925	chr3	195974300	195974301	SLC51A	200931	30916	CGI-S-Shelf	FALSE	TRUE	FALSE
cg02806645	chr3	138725153	138725154	PRR23A	729627	-42	CGI	TRUE	FALSE	FALSE
cg02834909	chr3	46759438	46759439	TMIE	259236	16614	CGI	TRUE	TRUE	FALSE
cg02860240	chr3	169530621	169530622	LRRC34	151827	-46	CGI	TRUE	FALSE	FALSE
cg02925229	chr3	139258948	139258949	RBP1	5947	-276	CGI-S-Shore	TRUE	FALSE	FALSE
cg02930239	chr3	138763670	138763671	PRR23C	389152	62	CGI	TRUE	FALSE	FALSE
cg02930432	chr3	50375483	50375484	RASSF1	11186	2882	CGI	TRUE	TRUE	FALSE
cg03022680	chr3	194117679	194117680	GP5	2814	2314	CGI	TRUE	TRUE	FALSE
cg03277049	chr3	156534076	156534077	LOC730091	730091	773	CGI	FALSE	TRUE	FALSE
cg03321003	chr3	89163804	89163805	EPHA3	2042	7129	CGI	FALSE	TRUE	FALSE
cg03467047	chr3	118864763	118864764	IGSF11	152404	133	CGI-N-Shore	TRUE	FALSE	FALSE
cg03470180	chr3	184210101	184210102	EPHB3	2049	-69484	CGI	FALSE	FALSE	TRUE
cg03515372	chr3	79551514	79551515	ROBO1	6091	265543	CGI	FALSE	TRUE	FALSE
cg03679504	chr3	46621556	46621557	LRRC2	79442	14	CGI-S-Shelf	TRUE	TRUE	FALSE
cg03826463	chr3	186211670	186211671	LOC253573	253573	-219	CGI	TRUE	FALSE	FALSE
cg03847932	chr3	73045556	73045557	PPP4R2	151987	-561	CGI-N-Shore	TRUE	FALSE	FALSE
cg03863817	chr3	96495925	96495926	EPHA6	285220	-37498	CGI	FALSE	FALSE	TRUE
cg03881775	chr3	147111135	147111136	ZIC4	84107	13459	CGI	TRUE	TRUE	FALSE
cg03900143	chr3	147111660	147111661	ZIC4	84107	12934	CGI	TRUE	TRUE	FALSE
cg04056669	chr3	195614059	195614060	TNK2	10188	24755	CGI	TRUE	TRUE	FALSE
cg04087740	chr3	71804142	71804143	EIF4E3	317649	-217	CGI	TRUE	FALSE	FALSE
cg04138502	chr3	123167522	123167523	ADCY5	111	-129	CGI	TRUE	FALSE	FALSE
cg04231050	chr3	133191297	133191298	BFSP2	8419	72506	CGI	FALSE	TRUE	FALSE
cg04238185	chr3	89164223	89164224	EPHA3	2042	7548	CGI-S-Shore	FALSE	TRUE	FALSE
cg04245305	chr3	195940754	195940755	ZDHHC19	131540	-2453	CGI	FALSE	FALSE	TRUE
cg04246526	chr3	43033200	43033201	FAM198A	729085	12440	Non-CGI	FALSE	TRUE	FALSE
cg04320255	chr3	71113313	71113314	MIR1284	100302112	477925	CGI-N-Shore	FALSE	TRUE	FALSE
cg04377724	chr3	9258433	9258434	SRGAP3	9901	32876	CGI	TRUE	TRUE	FALSE
cg04455646	chr3	10206344	10206345	IRAK2	3656	-217	CGI-N-Shore	TRUE	FALSE	FALSE
cg04457317	chr3	50567932	50567933	CACNA2D2	9254	-27039	CGI	FALSE	FALSE	TRUE
cg04467162	chr3	128764824	128764825	GP9	2815	-14819	CGI	FALSE	FALSE	TRUE
cg04468081	chr3	182983386	182983387	B3GNT5	84002	12353	Non-CGI	FALSE	TRUE	FALSE
cg04507915	chr3	32861407	32861408	TRIM71	131405	1896	CGI	FALSE	TRUE	FALSE
cg04535829	chr3	49694871	49694872	APEH	327	-16562	CGI	FALSE	TRUE	FALSE
cg04537229	chr3	186545622	186545623	ADIPOQ	9370	-14839	CGI-S-Shore	FALSE	FALSE	TRUE
cg04554240	chr3	138170552	138170553	ESYT3	83850	17136	CGI-N-Shore	FALSE	TRUE	FALSE
cg04682135	chr3	157260764	157260765	C3orf55	152078	-367	CGI	TRUE	FALSE	FALSE
cg04811592	chr3	69834386	69834387	MITF	4286	45799	Non-CGI	FALSE	TRUE	FALSE
cg04855678	chr3	195946921	195946922	SLC51A	200931	3537	CGI	FALSE	TRUE	FALSE
cg04913979	chr3	157821994	157821995	SHOX2	6474	1956	CGI	FALSE	TRUE	FALSE
cg04948892	chr3	181428462	181428463	SOX2	6657	-1248	CGI	TRUE	TRUE	FALSE
cg05091238	chr3	157813609	157813610	SHOX2	6474	10341	CGI-S-Shore	FALSE	FALSE	TRUE
cg05136476	chr3	53190709	53190710	PRKCD	5580	-4512	CGI	FALSE	FALSE	TRUE
cg05401764	chr3	157815808	157815809	SHOX2	6474	8142	CGI	FALSE	TRUE	FALSE
cg05409218	chr3	27756851	27756852	EOMES	8320	7353	CGI	FALSE	FALSE	TRUE
cg05513806	chr3	181438216	181438217	SOX2	6657	8503	CGI	FALSE	TRUE	FALSE
cg05657709	chr3	121742496	121742497	ILDR1	286676	-1368	CGI-S-Shore	TRUE	FALSE	FALSE
cg05716671	chr3	147131069	147131070	ZIC1	7545	3887	CGI-S-Shore	FALSE	TRUE	FALSE
cg05834845	chr3	195489306	195489307	MUC20	200958	41552	CGI	FALSE	TRUE	FALSE
cg05840612	chr3	46530275	46530276	LTF	4057	-3550	CGI	FALSE	FALSE	TRUE
cg05983061	chr3	39544192	39544193	MOBP	4336	35121	CGI	FALSE	TRUE	FALSE
cg06069310	chr3	38179874	38179875	MYD88	4615	-93	CGI	TRUE	FALSE	FALSE
cg06217323	chr3	75445502	75445503	FAM86DP	692099	38762	CGI	FALSE	FALSE	TRUE
cg06271087	chr3	65342546	65342547	MIR548A2	693126	636862	CGI	FALSE	TRUE	FALSE
cg06294561	chr3	141161580	141161581	RASA2	5922	-44344	CGI-N-Shore	TRUE	TRUE	FALSE
cg06322988	chr3	138725189	138725190	PRR23A	729627	-78	CGI	TRUE	FALSE	FALSE
cg06479057	chr3	112358468	112358469	CCDC80	151887	1507	Non-CGI	TRUE	TRUE	FALSE
cg06490988	chr3	128212001	128212002	GATA2	2624	27	CGI	TRUE	FALSE	FALSE
cg06494592	chr3	125709126	125709127	ROPN1B	152015	21097	CGI	FALSE	FALSE	TRUE
cg06597895	chr3	44935097	44935098	TGM4	7047	18998	Non-CGI	FALSE	TRUE	FALSE
cg06636831	chr3	45077369	45077370	CLEC3B	7123	9609	CGI	FALSE	TRUE	FALSE
cg06804344	chr3	128778699	128778700	GP9	2815	-944	CGI-N-Shelf	TRUE	FALSE	FALSE
cg07135614	chr3	138663230	138663231	FOXL2	668	2750	CGI	TRUE	FALSE	FALSE
cg07138366	chr3	186075879	186075880	DGKG	1608	4142	CGI-N-Shelf	FALSE	TRUE	FALSE
cg07220922	chr3	10806022	10806023	LINC00606	285370	-144	Non-CGI	TRUE	FALSE	FALSE
cg07250128	chr3	194833983	194833984	XXYLT1	152002	157910	CGI	FALSE	TRUE	FALSE
cg07276534	chr3	193534580	193534581	DPPA2P3	100128023	177445	Non-CGI	FALSE	FALSE	TRUE
cg07381000	chr3	53190613	53190614	PRKCD	5580	-4608	CGI	FALSE	FALSE	TRUE
cg07437373	chr3	134125814	134125815	MIR4788	100616281	-30853	CGI	FALSE	FALSE	TRUE
cg07452777	chr3	138725214	138725215	PRR23A	729627	-103	CGI	TRUE	FALSE	FALSE
cg07466705	chr3	11034749	11034750	SLC6A1	6529	328	CGI	FALSE	TRUE	FALSE
cg07611351	chr3	9258512	9258513	SRGAP3	9901	32797	CGI	TRUE	TRUE	FALSE
cg07613752	chr3	27756421	27756422	EOMES	8320	7783	CGI	FALSE	FALSE	TRUE
cg08013557	chr3	147115043	147115044	ZIC4	84107	9551	CGI	TRUE	TRUE	FALSE
cg08048268	chr3	133502702	133502703	SRPRB	58477	-173	CGI	TRUE	FALSE	FALSE
cg08105471	chr3	74439236	74439237	CNTN3	5067	131105	Non-CGI	FALSE	TRUE	FALSE
cg08121925	chr3	180588041	180588042	FXR1	8087	-42191	CGI	TRUE	TRUE	FALSE
cg08207895	chr3	50388901	50388902	NPRL2	10641	-414	CGI-S-Shore	TRUE	TRUE	FALSE
cg08281123	chr3	19791304	19791305	EFHB	151651	197195	CGI	FALSE	FALSE	TRUE
cg08357947	chr3	8000942	8000943	LMCD1-AS1	100288428	542400	Non-CGI	FALSE	TRUE	FALSE
cg08439880	chr3	133502540	133502541	SRPRB	58477	-335	CGI-N-Shore	TRUE	FALSE	FALSE
cg08443605	chr3	24872319	24872320	MIR4792	100616448	-309392	CGI	FALSE	FALSE	TRUE
cg08461247	chr3	13134432	13134433	IQSEC1	9922	-19814	Non-CGI	FALSE	FALSE	TRUE
cg08489309	chr3	54067965	54067966	CACNA2D3	55799	-88726	Non-CGI	FALSE	FALSE	TRUE
cg08516817	chr3	113160623	113160624	WDR52	55779	-261	CGI	TRUE	FALSE	FALSE
cg08521684	chr3	195488725	195488726	MUC20	200958	40971	CGI	FALSE	TRUE	FALSE
cg08538682	chr3	158390336	158390337	LXN	56925	144	Non-CGI	TRUE	TRUE	FALSE
cg08668199	chr3	127795571	127795572	SEC61A1	29927	24358	CGI	FALSE	TRUE	FALSE
cg08806578	chr3	51864587	51864588	IQCF3	401067	3696	Non-CGI	FALSE	TRUE	FALSE
cg08877188	chr3	195943579	195943580	SLC51A	200931	195	CGI	TRUE	FALSE	FALSE
cg09342567	chr3	178979013	178979014	KCNMB3	27094	5823	CGI	TRUE	TRUE	FALSE
cg09401099	chr3	156534380	156534381	LOC730091	730091	469	CGI	FALSE	TRUE	FALSE
cg09434534	chr3	118865026	118865027	C3orf30	152405	28	CGI-S-Shore	TRUE	FALSE	FALSE
cg09469667	chr3	9904687	9904688	RPUSD3	285367	-18984	CGI	FALSE	FALSE	TRUE
cg09591072	chr3	184301468	184301469	EPHB3	2049	21880	CGI	FALSE	FALSE	TRUE
cg10128511	chr3	98452940	98452941	ST3GAL6	10402	1787	CGI	FALSE	TRUE	FALSE
cg10144104	chr3	50518896	50518897	CACNA2D2	9254	21994	Non-CGI	FALSE	TRUE	FALSE
cg10313047	chr3	52351355	52351356	DNAH1	25981	1019	CGI-N-Shore	TRUE	TRUE	FALSE
cg10361095	chr3	42727425	42727426	KLHL40	131377	413	CGI	TRUE	FALSE	FALSE
cg10658438	chr3	194117018	194117019	GP5	2814	2975	CGI-N-Shore	FALSE	TRUE	FALSE
cg10752315	chr3	150238463	150238464	EIF2A	83939	-26109	CGI	FALSE	FALSE	TRUE
cg10755058	chr3	40428713	40428714	ENTPD3	956	39	CGI	TRUE	FALSE	FALSE
cg10791959	chr3	134516302	134516303	EPHB1	2047	2202	CGI	FALSE	TRUE	FALSE
cg10802528	chr3	197105334	197105335	DLG1	1739	-79190	Non-CGI	FALSE	FALSE	TRUE
cg10901368	chr3	181442137	181442138	SOX2	6657	12424	CGI	FALSE	TRUE	FALSE
cg10911980	chr3	43146909	43146910	GTDC2	84892	654	CGI-N-Shore	FALSE	TRUE	FALSE
cg11100465	chr3	14615134	14615135	GRIP2	80852	-31545	CGI-N-Shore	FALSE	FALSE	TRUE
cg11235602	chr3	39543776	39543777	MOBP	4336	34705	CGI	FALSE	TRUE	FALSE
cg11272515	chr3	147077468	147077469	ZIC4	84107	47126	CGI	FALSE	FALSE	TRUE
cg11361636	chr3	74662850	74662851	CNTN3	5067	-92506	CGI	FALSE	FALSE	TRUE
cg11594731	chr3	46940212	46940213	PTH1R	5745	20975	CGI	FALSE	TRUE	FALSE
cg11603443	chr3	58572520	58572521	FAM107A	11170	40815	CGI	FALSE	TRUE	FALSE
cg11612799	chr3	113933175	113933176	DRD3	1814	-14920	Non-CGI	TRUE	FALSE	FALSE
cg11615607	chr3	120004483	120004484	GPR156	165829	-41157	CGI-S-Shore	FALSE	FALSE	TRUE
cg11630135	chr3	13679166	13679167	LINC00620	285375	-13053	CGI	FALSE	TRUE	FALSE
cg11828621	chr3	27766252	27766253	EOMES	8320	-2045	CGI	FALSE	FALSE	TRUE
cg11883737	chr3	129276179	129276180	H1FOO	132243	14121	CGI	FALSE	TRUE	FALSE
cg11885357	chr3	138152902	138152903	ESYT3	83850	-511	CGI	TRUE	FALSE	FALSE
cg11921736	chr3	113160437	113160438	WDR52	55779	-75	CGI	TRUE	FALSE	FALSE
cg12019990	chr3	9032274	9032275	RAD18	56852	-27114	CGI-N-Shore	FALSE	TRUE	FALSE
cg12118013	chr3	134031948	134031949	AMOTL2	51421	62309	CGI	FALSE	FALSE	TRUE
cg12121643	chr3	185911796	185911797	ETV5	2119	-84894	CGI	FALSE	TRUE	FALSE
cg12177220	chr3	38080925	38080926	DLEC1	9940	228	CGI	TRUE	FALSE	FALSE
cg12204258	chr3	147131178	147131179	ZIC1	7545	3996	CGI	FALSE	TRUE	FALSE
cg12252865	chr3	13520771	13520772	HDAC11	79885	-451	CGI-N-Shore	TRUE	FALSE	FALSE
cg12258785	chr3	24537407	24537408	THRB	7068	-953	CGI	TRUE	FALSE	FALSE
cg12298268	chr3	139257866	139257867	RBP1	5947	803	CGI	FALSE	TRUE	FALSE
cg12307333	chr3	13663538	13663539	LINC00620	285375	-28681	CGI-N-Shore	FALSE	TRUE	FALSE
cg12326526	chr3	183209927	183209928	LOC100505687	100505687	44530	CGI	FALSE	TRUE	FALSE
cg12431087	chr3	71355122	71355123	MIR1284	100302112	236116	Non-CGI	TRUE	TRUE	FALSE
cg12595013	chr3	147128123	147128124	ZIC1	7545	941	CGI	TRUE	FALSE	FALSE
cg12841650	chr3	14615444	14615445	GRIP2	80852	-31855	CGI	FALSE	FALSE	TRUE
cg12892506	chr3	147113918	147113919	ZIC4	84107	10676	CGI	TRUE	TRUE	FALSE
cg12976582	chr3	50359583	50359584	HYAL2	8692	696	CGI	TRUE	TRUE	FALSE
cg12993163	chr3	157821407	157821408	SHOX2	6474	2543	CGI	FALSE	TRUE	FALSE
cg13033938	chr3	49824475	49824476	IP6K1	9807	-501	CGI-S-Shore	TRUE	FALSE	FALSE
cg13047869	chr3	10149882	10149883	FANCD2OS	115795	31	CGI	TRUE	FALSE	FALSE
cg13056927	chr3	42727915	42727916	KLHL40	131377	903	CGI	TRUE	FALSE	FALSE
cg13153394	chr3	45209196	45209197	CDCP1	64866	-21281	Non-CGI	FALSE	FALSE	TRUE
cg13284614	chr3	52569169	52569170	NT5DC2	64943	-75	CGI-S-Shore	TRUE	FALSE	FALSE
cg13303179	chr3	46759335	46759336	TMIE	259236	16511	CGI	TRUE	TRUE	FALSE
cg13323489	chr3	193587780	193587781	DPPA2P3	100128023	124245	CGI	FALSE	FALSE	TRUE
cg13343687	chr3	49843809	49843810	FAM212A	389119	3121	CGI-S-Shelf	FALSE	TRUE	FALSE
cg13421412	chr3	52529393	52529394	STAB1	23166	36	Non-CGI	TRUE	FALSE	FALSE
cg13460850	chr3	184302398	184302399	EPHB3	2049	22810	CGI-S-Shore	FALSE	FALSE	TRUE
cg13526469	chr3	13245693	13245694	IQSEC1	9922	-131075	CGI-N-Shore	FALSE	FALSE	TRUE
cg13707894	chr3	27674461	27674462	EOMES	8320	89743	CGI	FALSE	FALSE	TRUE
cg13752114	chr3	195489708	195489709	MUC20	200958	41954	CGI	FALSE	TRUE	FALSE
cg13960678	chr3	121980748	121980749	CSTA	1475	-63261	CGI	FALSE	TRUE	FALSE
cg14019186	chr3	158390074	158390075	LXN	56925	406	Non-CGI	FALSE	TRUE	FALSE
cg14218447	chr3	113418004	113418005	KIAA2018	205717	-2510	CGI-S-Shore	FALSE	FALSE	TRUE
cg14325153	chr3	138763899	138763900	PRR23C	389152	-164	CGI	TRUE	FALSE	FALSE
cg14339848	chr3	126062402	126062403	KLF15	28999	13832	CGI	FALSE	TRUE	FALSE
cg14463292	chr3	192289252	192289253	FGF12	2257	156134	Non-CGI	FALSE	TRUE	FALSE
cg14473344	chr3	142840240	142840241	CHST2	9435	1621	CGI	TRUE	TRUE	FALSE
cg14533390	chr3	65342843	65342844	MIR548A2	693126	637159	CGI	FALSE	TRUE	FALSE
cg14553506	chr3	183957794	183957795	MIR1224	100187716	-1397	CGI-N-Shore	TRUE	TRUE	FALSE
cg14567877	chr3	123071300	123071301	ADCY5	111	96090	Non-CGI	TRUE	TRUE	FALSE
cg14847243	chr3	184104362	184104363	CHRD	8646	6500	CGI	FALSE	TRUE	FALSE
cg14911395	chr3	50311213	50311214	C3orf45	132228	-5303	CGI	TRUE	TRUE	FALSE
cg14966362	chr3	26388072	26388073	LRRC3B	116135	-276226	Non-CGI	FALSE	FALSE	TRUE
cg14969094	chr3	156848003	156848004	LOC339894	339894	-7211	CGI-N-Shore	FALSE	FALSE	TRUE
cg15025640	chr3	14183669	14183670	TMEM43	79188	17228	Non-CGI	FALSE	TRUE	FALSE
cg15028458	chr3	58860290	58860291	C3orf67	200844	175466	Non-CGI	FALSE	TRUE	FALSE
cg15038286	chr3	128200723	128200724	GATA2	2624	11305	CGI-N-Shore	FALSE	TRUE	FALSE
cg15093769	chr3	139353058	139353059	NMNAT3	349565	43825	CGI	FALSE	TRUE	FALSE
cg15105326	chr3	147108916	147108917	ZIC4	84107	15678	CGI	FALSE	TRUE	FALSE
cg15135047	chr3	72149514	72149515	LOC201617	201617	-50892	CGI	TRUE	FALSE	FALSE
cg15142694	chr3	48694534	48694535	MIR4793	100616112	-12820	CGI	FALSE	TRUE	FALSE
cg15147215	chr3	52552868	52552869	NT5DC2	64943	16223	CGI	TRUE	TRUE	FALSE
cg15229124	chr3	139258912	139258913	RBP1	5947	-240	CGI	TRUE	FALSE	FALSE
cg15277914	chr3	154042611	154042612	DHX36	170506	-324	CGI-S-Shore	TRUE	FALSE	FALSE
cg15421087	chr3	41240855	41240856	CTNNB1	1499	4453	CGI	TRUE	TRUE	FALSE
cg15475553	chr3	181101204	181101205	SOX2-OT	347689	-180303	Non-CGI	FALSE	FALSE	TRUE
cg15497168	chr3	9642630	9642631	LHFPL4	375323	-47143	CGI	FALSE	FALSE	TRUE
cg15579376	chr3	138154754	138154755	ESYT3	83850	1338	CGI-S-Shore	FALSE	TRUE	FALSE
cg15630071	chr3	32861318	32861319	TRIM71	131405	1807	CGI	FALSE	TRUE	FALSE
cg15709989	chr3	185912227	185912228	ETV5	2119	-85325	CGI	FALSE	TRUE	FALSE
cg15868235	chr3	12486114	12486115	TSEN2	80746	-39815	Non-CGI	FALSE	FALSE	TRUE
cg16415457	chr3	23713441	23713442	UBE2E1	7324	-133941	CGI	FALSE	FALSE	TRUE
cg16468843	chr3	10370624	10370625	SEC13	6396	-7765	CGI	FALSE	TRUE	FALSE
cg16606324	chr3	10149918	10149919	FANCD2OS	115795	-2	CGI	TRUE	FALSE	FALSE
cg16705744	chr3	27756039	27756040	EOMES	8320	8165	CGI	FALSE	FALSE	TRUE
cg16768018	chr3	147108843	147108844	ZIC4	84107	15751	CGI	FALSE	TRUE	FALSE
cg16775939	chr3	197247220	197247221	BDH1	622	52972	CGI-S-Shore	FALSE	TRUE	FALSE
cg16822855	chr3	40428330	40428331	ENTPD3	956	-341	CGI-N-Shore	TRUE	FALSE	FALSE
cg16960810	chr3	13594910	13594911	FBLN2	2199	21085	CGI-N-Shore	FALSE	TRUE	FALSE
cg17025620	chr3	193587939	193587940	DPPA2P3	100128023	124086	CGI	FALSE	FALSE	TRUE
cg17295957	chr3	127006803	127006804	PLXNA1	5361	299365	CGI	FALSE	FALSE	TRUE
cg17342973	chr3	184301239	184301240	EPHB3	2049	21651	CGI	FALSE	FALSE	TRUE
cg17482033	chr3	147129778	147129779	ZIC1	7545	2596	CGI	FALSE	TRUE	FALSE
cg17534540	chr3	129024712	129024713	H1FX-AS1	339942	-10400	CGI	FALSE	FALSE	TRUE
cg17572056	chr3	195947062	195947063	SLC51A	200931	3678	CGI	FALSE	TRUE	FALSE
cg17611045	chr3	192289245	192289246	FGF12	2257	156141	Non-CGI	FALSE	TRUE	FALSE
cg17658717	chr3	45077254	45077255	CLEC3B	7123	9494	CGI	FALSE	TRUE	FALSE
cg17802213	chr3	185911316	185911317	ETV5	2119	-84414	CGI-N-Shore	FALSE	TRUE	FALSE
cg17822007	chr3	155463780	155463781	PLCH1	23007	-41782	CGI	FALSE	FALSE	TRUE
cg17884327	chr3	197840760	197840761	ANKRD18DP	348840	-33217	CGI	FALSE	FALSE	TRUE
cg17900356	chr3	53190593	53190594	PRKCD	5580	-4628	CGI	FALSE	FALSE	TRUE
cg18000598	chr3	194342907	194342908	TMEM44	93109	11509	CGI-N-Shore	FALSE	TRUE	FALSE
cg18004856	chr3	46029278	46029279	FYCO1	79443	8027	Non-CGI	FALSE	TRUE	FALSE
cg18026197	chr3	126422536	126422537	CHCHD6	84303	-580	CGI-N-Shore	TRUE	FALSE	FALSE
cg18099408	chr3	52552593	52552594	NT5DC2	64943	16498	CGI-N-Shore	TRUE	TRUE	FALSE
cg18129748	chr3	49941408	49941409	MST1R	4486	-101	CGI	TRUE	FALSE	FALSE
cg18171097	chr3	169532134	169532135	LRRC34	151827	-1559	CGI-S-Shore	TRUE	FALSE	FALSE
cg18172135	chr3	185912486	185912487	ETV5	2119	-85584	CGI-S-Shore	FALSE	TRUE	FALSE
cg18183817	chr3	13665008	13665009	LINC00620	285375	-27211	CGI-S-Shore	FALSE	TRUE	FALSE
cg18297437	chr3	147131332	147131333	ZIC1	7545	4150	CGI-S-Shore	FALSE	TRUE	FALSE
cg18337222	chr3	99595254	99595255	CMSS1	84319	58575	CGI	TRUE	TRUE	FALSE
cg18337363	chr3	52569053	52569054	NT5DC2	64943	38	CGI-S-Shore	TRUE	FALSE	FALSE
cg18406197	chr3	13590450	13590451	FBLN2	2199	16625	CGI-N-Shore	TRUE	TRUE	FALSE
cg18418186	chr3	184099432	184099433	CHRD	8646	1570	CGI	TRUE	TRUE	FALSE
cg18548864	chr3	112995278	112995279	BOC	91653	64865	Non-CGI	FALSE	TRUE	FALSE
cg18603228	chr3	13590439	13590440	FBLN2	2199	16614	CGI-N-Shore	TRUE	TRUE	FALSE
cg18697348	chr3	53926080	53926081	SELK	58515	-90	CGI	TRUE	FALSE	FALSE
cg18715709	chr3	185226302	185226303	TMEM41A	90407	-9456	Non-CGI	FALSE	TRUE	FALSE
cg18731398	chr3	123414733	123414734	MYLK-AS1	100506826	110329	Non-CGI	FALSE	TRUE	FALSE
cg18790741	chr3	13388921	13388922	NUP210	23225	72886	Non-CGI	FALSE	TRUE	FALSE
cg19029181	chr3	147130536	147130537	ZIC1	7545	3354	CGI	FALSE	TRUE	FALSE
cg19112357	chr3	13834712	13834713	WNT7A	7476	86904	CGI-N-Shore	FALSE	FALSE	TRUE
cg19113686	chr3	101406347	101406348	RPL24	6152	-783	CGI-S-Shore	TRUE	FALSE	FALSE
cg19211880	chr3	134088357	134088358	AMOTL2	51421	5900	CGI-N-Shelf	FALSE	TRUE	FALSE
cg19389001	chr3	122640778	122640779	LOC100129550	100129550	35417	CGI	FALSE	TRUE	FALSE
cg19434777	chr3	166528722	166528723	ZBBX	79740	569361	CGI	FALSE	FALSE	TRUE
cg19436429	chr3	178978985	178978986	KCNMB3	27094	5851	CGI	TRUE	TRUE	FALSE
cg19612450	chr3	42305186	42305187	CCK	885	2474	CGI	FALSE	TRUE	FALSE
cg19759549	chr3	128211096	128211097	GATA2	2624	932	CGI	FALSE	TRUE	FALSE
cg19764594	chr3	10806288	10806289	LINC00606	285370	-410	Non-CGI	TRUE	FALSE	FALSE
cg19860353	chr3	194756349	194756350	XXYLT1	152002	235544	CGI	FALSE	FALSE	TRUE
cg19873496	chr3	197105397	197105398	DLG1	1739	-79253	Non-CGI	FALSE	FALSE	TRUE
cg19944217	chr3	48727026	48727027	NCKIPSD	51517	-3691	CGI-S-Shelf	FALSE	TRUE	FALSE
cg19967421	chr3	46062881	46062882	XCR1	2829	6096	CGI	TRUE	TRUE	FALSE
cg20077230	chr3	67022852	67022853	KBTBD8	84541	-25873	CGI-S-Shore	FALSE	FALSE	TRUE
cg20276377	chr3	99595026	99595027	CMSS1	84319	58347	CGI	TRUE	TRUE	FALSE
cg20278854	chr3	195929492	195929493	ZDHHC19	131540	8806	CGI	FALSE	TRUE	FALSE
cg20693607	chr3	184319566	184319567	EPHB3	2049	39978	CGI	FALSE	FALSE	TRUE
cg20847228	chr3	50297087	50297088	SEMA3B	7869	-7951	CGI-N-Shore	TRUE	FALSE	FALSE
cg20916523	chr3	10184584	10184585	VHL	7428	1264	CGI-S-Shore	FALSE	TRUE	FALSE
cg20920097	chr3	127057149	127057150	TPRA1	131601	252417	CGI	FALSE	TRUE	FALSE
cg21090033	chr3	196065357	196065358	TM4SF19-TCTEX1D2	100534611	-65	Non-CGI	TRUE	FALSE	FALSE
cg21093807	chr3	56717625	56717626	FAM208A	23272	-489	CGI	TRUE	FALSE	FALSE
cg21096345	chr3	32432942	32432943	CMTM7	112616	-219	CGI-N-Shore	TRUE	FALSE	FALSE
cg21127068	chr3	147124417	147124418	ZIC4	84107	177	CGI-N-Shore	TRUE	FALSE	FALSE
cg21136104	chr3	142666320	142666321	PAQR9	344838	15856	CGI	FALSE	FALSE	TRUE
cg21141812	chr3	48556323	48556324	SHISA5	51246	-14094	Non-CGI	FALSE	TRUE	FALSE
cg21197336	chr3	193587490	193587491	DPPA2P3	100128023	124535	CGI	FALSE	FALSE	TRUE
cg21200353	chr3	183145532	183145533	MCF2L2	23101	321	CGI	FALSE	TRUE	FALSE
cg21394171	chr3	122755851	122755852	SEMA5B	54437	-8398	Non-CGI	FALSE	FALSE	TRUE
cg21399510	chr3	193922180	193922181	HES1	3280	68248	CGI	FALSE	FALSE	TRUE
cg21473142	chr3	27762095	27762096	EOMES	8320	2109	CGI-S-Shore	FALSE	TRUE	FALSE
cg21487550	chr3	127056955	127056956	TPRA1	131601	252611	CGI	FALSE	TRUE	FALSE
cg21611775	chr3	11058836	11058837	SLC6A1	6529	24415	CGI-N-Shore	TRUE	TRUE	FALSE
cg21621104	chr3	66468921	66468922	LRIG1	26018	81922	Non-CGI	FALSE	TRUE	FALSE
cg21662156	chr3	196753119	196753120	MFI2	4241	3566	CGI-S-Shore	FALSE	TRUE	FALSE
cg21792155	chr3	46940347	46940348	PTH1R	5745	21110	CGI	FALSE	TRUE	FALSE
cg21838625	chr3	10378056	10378057	SEC13	6396	-15197	CGI	TRUE	TRUE	FALSE
cg21856334	chr3	196754664	196754665	MFI2	4241	2021	CGI	FALSE	TRUE	FALSE
cg21864304	chr3	11746722	11746723	VGLL4	9686	15496	CGI	FALSE	TRUE	FALSE
cg22037648	chr3	50311009	50311010	C3orf45	132228	-5507	CGI	TRUE	TRUE	FALSE
cg22092811	chr3	99595145	99595146	CMSS1	84319	58466	CGI	TRUE	TRUE	FALSE
cg22120095	chr3	50488020	50488021	CACNA2D2	9254	52870	CGI	FALSE	TRUE	FALSE
cg22229016	chr3	50304279	50304280	SEMA3B	7869	-759	Non-CGI	TRUE	FALSE	FALSE
cg22607164	chr3	184349562	184349563	EPHB3	2049	69974	CGI	FALSE	FALSE	TRUE
cg22613854	chr3	194705954	194705955	LOC100507391	100507391	276803	CGI	FALSE	FALSE	TRUE
cg22620797	chr3	69061827	69061828	EOGT	285203	945	CGI	TRUE	TRUE	FALSE
cg22692725	chr3	52722452	52722453	SNORD19	692089	-802	CGI-S-Shore	TRUE	TRUE	FALSE
cg22843684	chr3	10806114	10806115	LINC00606	285370	-236	Non-CGI	TRUE	FALSE	FALSE
cg22978620	chr3	128210888	128210889	GATA2	2624	1140	CGI	FALSE	TRUE	FALSE
cg22988851	chr3	41752483	41752484	ULK4	54986	251175	Non-CGI	FALSE	TRUE	FALSE
cg22993195	chr3	49756301	49756302	AMIGO3	386724	935	CGI	TRUE	TRUE	FALSE
cg23052855	chr3	195929389	195929390	ZDHHC19	131540	8909	CGI-N-Shore	FALSE	TRUE	FALSE
cg23085666	chr3	125820924	125820925	SLC41A3	54946	-532	Non-CGI	TRUE	FALSE	FALSE
cg23181900	chr3	130368298	130368299	COL6A6	131873	89119	CGI	FALSE	TRUE	FALSE
cg23202468	chr3	42705828	42705829	ZBTB47	92999	10651	CGI	FALSE	TRUE	FALSE
cg23222057	chr3	59798132	59798133	C3orf67	200844	-762373	Non-CGI	FALSE	TRUE	FALSE
cg23363832	chr3	139258939	139258940	RBP1	5947	-267	CGI-S-Shore	TRUE	FALSE	FALSE
cg23513930	chr3	10334717	10334718	GHRL	51738	-85	Non-CGI	TRUE	TRUE	FALSE
cg23819669	chr3	128187274	128187275	DNAJB8	165721	-1182	Non-CGI	TRUE	TRUE	FALSE
cg23970189	chr3	53926101	53926102	SELK	58515	-111	CGI	TRUE	FALSE	FALSE
cg24000814	chr3	184301730	184301731	EPHB3	2049	22142	CGI	FALSE	FALSE	TRUE
cg24033633	chr3	57945695	57945696	FLNB	2317	-48430	Non-CGI	FALSE	FALSE	TRUE
cg24170085	chr3	15311269	15311270	CAPN7	23473	63535	Non-CGI	TRUE	TRUE	FALSE
cg24308560	chr3	49941425	49941426	MST1R	4486	-118	CGI-S-Shore	TRUE	FALSE	FALSE
cg24330379	chr3	48647389	48647390	UQCRC1	7384	-290	CGI	TRUE	FALSE	FALSE
cg24529771	chr3	178978849	178978850	KCNMB3	27094	5987	CGI	TRUE	TRUE	FALSE
cg24530147	chr3	138763894	138763895	PRR23C	389152	-159	CGI	TRUE	FALSE	FALSE
cg24576945	chr3	42743203	42743204	HHATL	57467	1114	Non-CGI	TRUE	TRUE	FALSE
cg24620761	chr3	147123199	147123200	ZIC4	84107	1395	CGI-N-Shore	TRUE	TRUE	FALSE
cg24691167	chr3	10749371	10749372	ATP2B2	491	343	CGI	FALSE	TRUE	FALSE
cg24782772	chr3	181428329	181428330	SOX2	6657	-1381	CGI	TRUE	TRUE	FALSE
cg24872425	chr3	138725335	138725336	PRR23A	729627	-224	CGI	TRUE	FALSE	FALSE
cg24892362	chr3	184319417	184319418	EPHB3	2049	39829	CGI	FALSE	FALSE	TRUE
cg24925929	chr3	122640935	122640936	LOC100129550	100129550	35574	CGI	FALSE	TRUE	FALSE
cg24938752	chr3	128294769	128294770	C3orf27	23434	158	Non-CGI	TRUE	FALSE	FALSE
cg24942922	chr3	120003547	120003548	GPR156	165829	-40221	CGI-N-Shore	FALSE	FALSE	TRUE
cg25120326	chr3	13591084	13591085	FBLN2	2199	17259	CGI-S-Shore	FALSE	TRUE	FALSE
cg25129124	chr3	42727489	42727490	KLHL40	131377	477	CGI	TRUE	FALSE	FALSE
cg25159927	chr3	49947934	49947935	MST1R	4486	-6627	CGI	FALSE	TRUE	FALSE
cg25221975	chr3	13663444	13663445	LINC00620	285375	-28775	CGI-N-Shore	FALSE	TRUE	FALSE
cg25262361	chr3	178978993	178978994	KCNMB3	27094	5843	CGI	TRUE	TRUE	FALSE
cg25436886	chr3	127056972	127056973	TPRA1	131601	252594	CGI	FALSE	TRUE	FALSE
cg25439655	chr3	122641248	122641249	LOC100129550	100129550	35887	CGI	FALSE	TRUE	FALSE
cg25457886	chr3	14339565	14339566	SLC6A6	6533	-104539	CGI	FALSE	FALSE	TRUE
cg25499397	chr3	51990575	51990576	GPR62	118442	1244	CGI	TRUE	FALSE	FALSE
cg25506747	chr3	157813810	157813811	SHOX2	6474	10140	CGI-S-Shore	FALSE	TRUE	FALSE
cg25513924	chr3	187009486	187009487	MASP1	5648	322	Non-CGI	TRUE	TRUE	FALSE
cg25646708	chr3	134031685	134031686	RYK	6259	-62098	CGI	FALSE	FALSE	TRUE
cg25736251	chr3	61235869	61235870	FHIT	2272	1262	CGI	FALSE	TRUE	FALSE
cg25821785	chr3	50403130	50403131	TMEM115	11070	-6190	CGI-S-Shore	FALSE	TRUE	FALSE
cg25831075	chr3	164915196	164915197	SLITRK3	22865	-726	CGI-S-Shore	TRUE	FALSE	FALSE
cg25921813	chr3	194797138	194797139	XXYLT1	152002	194755	Non-CGI	FALSE	TRUE	FALSE
cg26031678	chr3	13613505	13613506	FBLN2	2199	39680	CGI-S-Shore	FALSE	TRUE	FALSE
cg26151355	chr3	183226025	183226026	KLHL6	89857	47472	CGI	FALSE	TRUE	FALSE
cg26160218	chr3	24538388	24538389	THRB	7068	-1934	CGI-S-Shore	TRUE	FALSE	FALSE
cg26307117	chr3	46506552	46506553	LTF	4057	20170	CGI-S-Shore	TRUE	TRUE	FALSE
cg26312807	chr3	127057048	127057049	TPRA1	131601	252518	CGI	FALSE	TRUE	FALSE
cg26389316	chr3	9273803	9273804	SRGAP3	9901	17506	Non-CGI	FALSE	TRUE	FALSE
cg26398467	chr3	147087237	147087238	ZIC4	84107	37357	CGI-S-Shore	FALSE	FALSE	TRUE
cg26401673	chr3	43431343	43431344	SNRK	54861	103338	Non-CGI	FALSE	TRUE	FALSE
cg26432350	chr3	47040357	47040358	NRADDP	100129354	-12673	Non-CGI	FALSE	TRUE	FALSE
cg26554505	chr3	55516711	55516712	WNT5A	7474	4618	CGI	TRUE	TRUE	FALSE
cg26680097	chr3	70048832	70048833	MITF	4286	260245	CGI	TRUE	FALSE	FALSE
cg26692003	chr3	13063165	13063166	IQSEC1	9922	51450	Non-CGI	FALSE	TRUE	FALSE
cg27136844	chr3	147142355	147142356	ZIC1	7545	15173	CGI	FALSE	FALSE	TRUE
cg27244524	chr3	38494523	38494524	ACVR2B	93	-1265	CGI-N-Shore	TRUE	TRUE	FALSE
cg27314002	chr3	46506519	46506520	LTF	4057	20203	CGI-S-Shore	TRUE	TRUE	FALSE
cg27351619	chr3	42700108	42700109	ZBTB47	92999	4931	CGI	FALSE	TRUE	FALSE
cg27353899	chr3	195488922	195488923	MUC20	200958	41168	CGI	FALSE	TRUE	FALSE
cg27427514	chr3	193922037	193922038	HES1	3280	68105	CGI	FALSE	FALSE	TRUE
cg27622506	chr3	24537160	24537161	THRB	7068	-706	CGI	TRUE	FALSE	FALSE
cg27642784	chr3	157813670	157813671	SHOX2	6474	10280	CGI-S-Shore	FALSE	FALSE	TRUE
cg00135497	chr4	155661849	155661850	LRAT	9227	-3301	CGI	FALSE	TRUE	FALSE
cg00146756	chr4	6729110	6729111	BLOC1S4	55330	11267	CGI	FALSE	FALSE	TRUE
cg00316839	chr4	85414135	85414136	NKX6-1	4825	5250	CGI	FALSE	FALSE	TRUE
[truncated: 53,686 more rows]
