# Supplementary material for: H3K4me1 marks DNA regions hypomethylated during aging in human stem and differentiated cells
Source: HighWire-hosted journal article supplement (doi:10.1101/gr.169011.113), 2014-09-30
Supplement: Supplemental_Table_12.xlsx [file Supplemental_Table_12.xlsx]

## Sheet: ST12
Supplemental Table 12: Tissue-specificity of the genes established according to the behaviour of Blood DNA methylation variance during aging, according to “up tissue” analysis of DAVID.
	Category	Term	Genes	FDR
Convergent
	UP_TISSUE	Brain	MEF2B, SCN3B, CUL3, LPHN2, AGTR1, LPHN3, ZNF776, GRIN2D, BTBD3, LRRC7, CDH23, INA, TMEFF2, LRRC6, RREB1, C10ORF107, EOMES, GRIN2A, TOX2, KIAA1522, NPC1, GLUL, EGFLAM, ZNF785, RYR1, ROR1, UNC13A, CPSF3L, RAD21L1, RALGPS1, MOB2, TNRC18, DUSP10, CACNB1, CACNB4, FAM19A4, SULT4A1, IL17D, PFN1, UBASH3B, FAIM, C19ORF26, PHYHIPL, ZC3H13, ASXL3, ATP11A, NDC80, ACACB, ZSCAN1, GAS7, COL14A1, PKP2, RERE, CDC…	5.25747e-15
	UP_TISSUE	Cerebellum	SNCAIP, SRCIN1, IL16, SGMS1, SHF, SLC26A10, TSSC1, BDNF, ANK1, KCNK9, TRAK2, B3GALNT1, AAK1, PRRT1, GRID2, ZNF577, OSBP2, SNRPN, GRIN2A, EXD3, CBLN1, GRB10, LAMC2, COL24A1, HDLBP, SNAP91, GNAI2, ITGB4, TRIM72, SYPL2, MCF2L2, TTYH3, EIF3H, RNF165, NDRG4, SLC35F1, TTYH1, DIABLO, PCDHA12, RAP1GAP2, NOVA1, B4GALT5, PHYHIPL, GABRA1, ABR, C17ORF102, GRIN1, SLC6A15, GAS7, SNURF, RPL18A, CNIH4, TMOD2, TH…	0.0247995
Divergent
	UP_TISSUE	Brain	MEF2B, CDIPT, RADIL, MAP3K6, DIRAS1, ZNF776, PIP5KL1, PPAPDC3, DHX38, BTBD3, VPS4A, DHX36, DHX32, HIGD1A, LRRC3, C10ORF107, EOMES, VPS41, ISG20L2, MARK4, SARS2, MARK1, BRAP, EGFLAM, DOC2A, RCC2, SIPA1L1, FOXG1, ROR1, HLA-DRA, SCN1B, RALGPS1, HSD17B12, WARS2, FAM19A1, CACNB4, RCC1, FAM19A4, FAM19A5, ARIH2, IMPG1, DUSP15, KBTBD7, TECTB, PHYHIPL, ZC3H18, JTB, ATP11A, GAS2, HBA1, ATR, GAS8, UBE2L3, Z…	2.0411e-30
	UP_TISSUE	Amygdala	FLYWCH1, CADM4, C7ORF43, LYPD6, CADM2, RUSC1, SYT3, CCDC149, CLK1, BAK1, PGPEP1, NKPD1, ATXN10, CUL9, RAB24, RARA, PELI3, TIGD6, ITFG3, GNG7, TMIE, EMX2, PTPRR, ZNF649, TMEM130, DCTN4, DCTN1, TMEM132D, TMEM132C, C1ORF86, CRHR2, ZFP82, LHFPL5, CCR6, SIPA1L1, TMEM184B, SLC30A10, MYO18A, ZIM2, LPPR3, LPPR4, PCDH20, RER1, FAM19A1, CACNB4, WDR52, CRMP1, ALDH4A1, IQSEC1, SGIP1, PHYHIPL, ABR, ZNF620, HP…	0.000344107
	UP_TISSUE	Hippocampus	FLYWCH1, ALDH1L1, PLXNA4, NELL2, GRIK4, PPP2R5C, ITPKB, FGF12, ADORA1, CD47, PGPEP1, PACSIN1, ST3GAL2, SH2D5, CISD3, ZFP90, CHRNA4, RAPGEF4, OLIG2, FAM53B, RPRD1B, ATRNL1, SUCLG2, BAIAP3, HLA-L, RAN, KIF5A, ENC1, GRIN2A, HTR4, PTPRR, LIFR, ZDBF2, CTNNA2, CRHR1, SLITRK3, KCNT1, RASGRF2, FLII, AKAP6, RYR2, AKAP7, NEK6, FAM172A, LOC100130539, ZIM2, TMX1, PACS2, ME3, FIP1L1, CDK5R2, GCLC, ADORA2A, PC…	0.00106148
	UP_TISSUE	Fetal brain	LYPD1, ADCY1, PPP2R5C, AQP4, ITSN2, SLC26A11, FAM124A, ATP2B4, CRY2, GRIN2B, GRIN2D, SCD5, TIGD7, TMEM14A, PITX2, WNT10B, NODAL, DCDC2, TBR1, C10ORF2, RND3, HAS1, HTR7, HTR6, FOXG1, PRDM2, MADCAM1, MAPK8, MAPK7, ADAMTS5, SH3GL2, SH3GL1, LPPR5, ERBB4, LOC400891, C15ORF27, PXK, EPHB1, PPP1R3E, LHX1, BAI1, BAI2, PPP2R2B, NPHP1, TRPC3, C15ORF38, SMAD4, PCDH15, ABCG1, SFRP5, NTRK3, EPHA4, EPHA7, RNF20…	0.0209169
LV
	UP_TISSUE	Brain	SCN3A, SCN3B, SART3, AMOTL1, AMOTL2, LPHN2, LPHN3, PIP5KL1, BTBD1, RPLP0, BTBD2, BTBD3, LRRC7, HIGD1A, LPHN1, TMEFF2, LRRC3, LRRC6, SCN2B, NOXA1, BTBD7, BTBD9, SARS2, EGFLAM, TAGLN, HSD11B1, ADSL, HIGD2B, ORAI2, SCN1B, RALGPS1, CACNB1, CACNB3, CACNB4, ATN1, ZAP70, FAIM, DHX8, ACACA, PPAPDC1A, NXF1, ACACB, ZSCAN1, ZSCAN2, PARP3, ACAD11, PARP1, ACAD10, GFAP, NUAK1, KISS1R, CILP2, MGRN1, TICAM1, ANP…	1.24487e-69
	UP_TISSUE	Epithelium	RPLP2, WTAP, AMOTL1, SART3, SART1, MAP3K7, MAK16, ZNF775, PPAPDC2, RPLP0, RPLP1, PDHA2, CCAR1, MCRS1, BSG, TFPT, CYP1A1, ANKS3, PTBP1, UBE2J1, BSN, MARK2, JUP, EIF2AK1, RCC2, ASCC2, DHX29, SCYL1, PTRF, SIPA1L1, JUN, MYBBP1A, EIF2AK4, RALGPS2, DUSP10, CACNB1, GSTCD, RCC1, MYBL2, PFN1, PFN2, ATN1, SERF2, DHX57, DHX8, ZC3H14, DHX9, ZC3H13, ESRRA, ZC3H18, ACACA, NDC80, ATR, ATM, USF2, PRPSAP2, EI24, …	2.83652e-31
	UP_TISSUE	Placenta	MEF2B, MEF2A, ALPPL2, CDIPT, SCN3A, OSMR, VPS54, ASCC1, SYNCRIP, VPS53, GFER, WTAP, LOC400684, AMOTL2, SART1, ZNF775, PPAPDC3, DHX38, RPLP1, ZNF395, DHX30, DHX32, CCAR1, HIGD1B, SNORA7B, CYP1A1, PTBP1, LRRC1, MARK3, MARK2, JUP, PPP1CA, EIF2AK1, EGFLAM, HSD11B2, EIF2AK2, MYBBP1A, SCN1B, DUSP12, DUSP18, PFN1, CKLF, ALDH4A1, SERF2, ARNTL2, NTHL1, SPP1, SPOP, ZC3H14, DHX9, ACER3, ESRRA, ZC3H15, PAIP2…	1.97895e-16
	UP_TISSUE	Uterus	MEF2A, PGAM1, SYNCRIP, REST, RPL22L1, WTAP, ITSN1, OGDH, SART3, MED20, SHKBP1, MAP3K7, CUL3, MAMSTR, SH3YL1, USP54, MAK16, RAE1, MED26, PIK3C3, ZNF397, DHX30, TBPL1, PDPR, ARC, MCRS1, TFPT, KIF5B, OLFML2B, ZNF507, BTBD6, SERPING1, ZNF503, PKHD1L1, PROX2, GATS, ERMAP, RCC2, ASCC2, TAGLN, ZNF783, MED16, JUN, KIAA1524, PRKRIP1, MED18, PPP2R5E, EIF2AK2, EIF2AK4, RAD23B, ORAI1, NFKBIB, ZNF131, ZSCAN5A…	7.19714e-15
	UP_TISSUE	Lung	OXA1L, SYNCRIP, SNORA67, RADIL, WTAP, MAP3K7, ZNF777, MAP3K5, USP54, RPLP0, FOXF1, ZNF773, FOXF2, DHX34, PDHA2, ZNF394, PTBP2, TBPL1, HIGD1A, LPHN1, ACAA2, PTBP1, SIPA1L3, ZNF37A, JUP, ZNF787, PPP1CA, EGFLAM, PTRF, HACL1, CYP1B1, DNAH12, DUSP10, XAB2, ORAI3, T, PFN1, PFN2, DUSP14, KBTBD8, ISY1, ALDH4A1, SERF2, NTHL1, ESRRA, TAOK2, PPAPDC1B, DUSP23, JTB, DUSP22, NXF1, FNIP1, BFAR, EI24, DUSP26, PO…	9.99201e-13
	UP_TISSUE	Eye	PPP2R5D, MED25, MED24, SYNCRIP, RORB, SART3, B2M, APP, TAF5L, MAP3K5, CUL7, RPLP1, PTBP2, CDH23, BSG, PDPN, PCID2, LIG1, MARK4, NCAPD3, GATS, SARS2, THY1, SSTR2, GLUL, MED15, SCYL1, MAPK3, ABAT, ADSL, MYBBP1A, ADSS, ZNF516, MTX2, CRTC1, MYBL2, RCC1, TMEM50B, SLC29A3, SLC29A2, LPCAT1, VWA5B2, KBTBD4, SLC29A4, AHNAK2, DHX57, LAPTM4B, ACER3, PAIP2, FOXRED2, ESRRG, ACACA, GARS, PIBF1, VDAC2, GAS7, RE…	2.85028e-10
	UP_TISSUE	Muscle	MEF2C, SCAF1, LDHB, KIFC1, XRCC3, RPL19, TUBB2B, PGF, RORA, MED22, AMOTL1, KIAA0319L, OGDH, KIFC3, WDR74, ACTG1, RPLP0, SH3BGR, ITFG1, CCAR1, MTERFD1, KIF5B, TADA2A, PCBD1, UBE2J1, MYLK2, CCDC137, PROX1, TOX2, WDR83, PPP1CA, GLUL, SERPINF1, PTRF, RCC2, ZWINT, ST14, EIF2S2, RYR1, RPS13, TGIF2, YME1L1, MAPK7, EIF2AK4, HIGD2A, HSPA1A, HSPA1B, DUSP11, RCC1, DIDO1, ACP1, ATP6V0B, ATP6V0C, LOC407835, S…	8.8195e-10
	UP_TISSUE	Skin	PDP1, VPS54, PGAM1, ZNF781, RPLP2, GFER, VPRBP, MED22, RADIL, SART3, AMOTL1, B2M, TMEM140, CUL3, MAP3K6, USP54, MC1R, SERPINE2, SBSN, BTBD2, MED27, ZNF394, TMEM14C, HIGD1A, CCAR1, TFPT, PTBP1, EXD3, ZNF503, MYH9, EIF2AK1, ASCC2, MED16, ASCC3, MED17, BACE2, MAPK9, HIGD2A, CPSF3L, DCBLD2, PPP2R3A, HSD17B14, CHCHD1, PABPC4, CHCHD3, RER1, ARF6, CHCHD5, ARF5, ATP12A, SERPINH1, ACSBG1, ZNF513, LOC40783…	3.68342e-09
	UP_TISSUE	Lymph	XRCC3, VKORC1L1, SURF6, RPL13, PGAM1, NAA15, INTS1, PVRIG, SGMS1, WDR81, RUNDC1, FLI1, MAT1A, RPLP0, DHX30, ZNF43, DDRGK1, NCF4, RCOR1, ZHX2, OLFML2A, ERGIC1, NME6, TMEM134, ZNF789, ZWINT, SMARCAL1, MAPK3, ZZZ3, RPS10, ACAA1, CPSF3L, HADHA, KIAA1009, RPS26, LYL1, C1ORF50, ZNF799, TMEM123, CDC123, HLA-DOA, RECQL4, ODC1, RPSA, UNC119, SPNS3, SPHK2, C15ORF39, NDC80, FXR2, FNIP2, LOC648987, SYNE1, NA…	2.94736e-08
	UP_TISSUE	Platelet	PEAR1, LTBP1, C6ORF25, PTGS1, MAP3K7, PGR, ACTG1, ACBD3, MAP3K5, ERO1LB, APP, RPLP1, PDHA2, RAB27B, GNG5, YARS, BCL2L14, TNIK, MYH9, MARK2, ST13, MAPK1, MYO18B, PPP1CA, F5, FLII, PELO, CD226, MYO18A, SH3GL1, LY6G6D, LY6G6F, UBA7, NAGK, HADHB, LOC407835, PPP1R3D, CDC42EP1, UBASH3B, RCHY1, GIT1, GPD2, NPLOC4, MAP2K2, VDAC2, SEPT11, EMILIN1, VDAC1, LASP1, MAP4, SLC9A1, LIMA1, PDIA3, UBE2G1, RTN1, AS…	1.45995e-07
	UP_TISSUE	Kidney	ALDH8A1, OXA1L, BTD, AURKAIP1, SCN3A, VKORC1L1, CRHBP, PPP2R5D, RPLP2, RORC, SYNCRIP, MED21, ITSN1, AMOTL2, TMEM141, ZNF777, EPC2, PGAM5, ZNF396, ZNF394, DHX32, IKBKAP, PDPN, LRRC2, NOXA1, CRTAP, KIF5C, USHBP1, SCYL3, LPCAT2, MECOM, MARK2, EGFLAM, MED15, CD320, HSD11B2, PMP22, UNC13B, KLRC1, SH3GL1, SCN1B, PABPC4, NFKBIA, FAM19A1, ATP12A, VPS72, SCRIB, KBTBD2, ARIH2, SLC29A3, C1ORF56, UBASH3B, SL…	2.23627e-07
	UP_TISSUE	Spleen	SLC9A9, SCAF1, A2M, PEAR1, LTBP3, NAA16, SNORA67, AMOTL1, WDR81, ISG20, WDR73, HIST1H2BI, MAP3K9, ZNF773, ZNF395, LSM3, C15ORF53, ADAM8, CDH23, GBP5, NCF2, CRYAA, C10ORF105, PCID2, RXRA, PTBP1, MYLK4, UBE2J1, OLFML2A, ZNF503, MYH9, SSPN, BCL2L11, ZNF234, GLUL, ZNF789, EGFLAM, UNC13D, MED15, ZZZ3, MAPK7, FCHSD1, TNFRSF6B, CRTC3, ZNF614, ACP5, PRRC1, XAB2, PPP1R3E, NPHP3, SGK223, IL23A, LPCAT1, KBT…	2.19608e-06
	UP_TISSUE	Colon	ALPPL2, OSMR, PPP2R5D, LDHD, VPS52, RORC, CLPTM1L, LPHN3, BTBD2, RPLP0, FOXF1, PATZ1, ZNF394, CDH24, DHX32, TMEFF2, LRRC2, NOXA1, VPS45, LPCAT3, LPCAT4, MARK2, GLUL, ASCC2, ZWINT, MED18, HLA-DRA, CPSF3L, HACL1, CRTC1, CHCHD2, CHCHD4, SLC29A1, SH3BP5L, PFN1, TMEM125, RAC1, NAT10, DHX58, ESRRA, ZNF529, FOXRED2, ATP11B, ZNF524, SEPT11, CYP7B1, CDC42BPG, FAM151A, PKP3, AKNAD1, PARP8, CDC42BPA, BTBD10…	2.37579e-06
	UP_TISSUE	Fetal brain cortex	LDHB, SNCB, TUBB2B, TUBB2A, SNCA, PGAM1, MC1R, RPLP0, DDAH2, DDAH1, DCTN2, ST13, PGLS, NME2, EGFLAM, NME1, DBN1, FUS, ALDOA, LMNB1, LMNB2, HSPA1A, HSPA1B, ACAT2, CALR, ACAT1, TAGLN3, HNRNPA3, PEA15, PFN2, TPI1, CRMP1, IDH1, RPSA, LGALS1, PHB, VDAC2, HNRNPA1, SEPT11, VDAC1, PPA1, HYOU1, CCT5, RABEP1, ARF1, HEBP2, TMOD2, PCNA, CRYM, GFAP, SEPHS1, PDIA3, ATP5B, RPLP0P2, CKB, EFHD2, HSPH1, RBM4B, MAP…	3.82673e-05
	UP_TISSUE	Cervix carcinoma	XRCC5, RPL17, HRAS, XRCC3, XRCC2, HM13, XRCC6, ASCC1, INTS1, MED24, SYNCRIP, MED23, H1FX, ZFP91, ACBD3, HIST1H2BK, CUL9, RPLP0, DHX33, RPL11, PTBP2, HIGD1A, CUL1, CLNS1A, PAN2, POLK, IKBKAP, GTPBP4, PLD1, MCRS1, PAN3, POLH, RAN, EMG1, RCOR1, MTPAP, OPTN, MED13, GCC1, RAD1, JUP, DCLRE1C, RPS19, SCYL1, MED15, ASCC2, SPAG5, ASCC3, MED16, MED17, RYR3, SERBP1, NLE1, RPS12, SRP72, TGFB1I1, SIVA1, PUS1,…	4.71581e-05
	UP_TISSUE	Cajal-Retzius cell	LDHB, SEPT2, TUBB2B, TUBB2A, PITPNA, CAPZA2, PGAM1, EIF5A, CBX3, SYNCRIP, SELENBP1, CBX1, CCT3, ACTG1, GSTM2, TTR, APOA1, MC1R, TARDBP, AKR7A2, DDAH2, DDAH1, TXNL1, RAN, HNRNPA2B1, ERP29, PDXP, EEF2, PSMA2, PSMA1, NME2, PGLS, PA2G4, NME1, STMN1, MDH1, MPST, ALDOA, LMNB1, STRAP, GRB2, GLUD1, HSPA1A, STIP1, HSPA1B, CALR, PSMA7, NAGK, ACAT2, ACP1, CAPZB, TAGLN3, AHSG, HNRNPA3, HNRNPL, TUBB, TPI1, HN…	0.000132569
	UP_TISSUE	Pancreas	MEF2A, AURKAIP1, GBGT1, AMOTL2, APP, RPLP0, TMEM14C, MECOM, LPCAT3, ZNF787, PPP1CA, UNC13D, TMEM136, PTRF, BACE1, MAPK7, EIF2AK3, ACAA1, RALGPS1, NFKBIE, RAD23A, NFKBIB, HSD17B12, PFN1, TMEM50A, INS, RAC1, CKLF, CASZ1, SERF2, SPPL3, PCIF1, DUSP22, AIDA, PARP8, SPNS1, ZNFX1, EZH2, GPLD1, RNF185, RNF186, LRRC17, LY9, MMP28, MAP1LC3B, SNAP47, CEACAM6, IAH1, HYAL1, TMCO6, AIFM3, ANP32B, ARHGEF19, ELM…	0.000140324
	UP_TISSUE	Cervix	TGOLN2, PLEKHM2, RPL13, RPL15, INTS3, ZNF638, HMHA1, HIST1H2BK, CLK3, PGAM5, RPLP0, ILK, PHTF1, C9ORF43, PDPR, TYRO3, CYP1A1, TTC7A, MARK3, ERGIC2, DCAF5, AQR, MED15, ZNF786, SH3GL1, ACP6, CHCHD3, ZNF511, ASL, MTIF3, NPHP3, C19ORF24, SPOP, ZNF622, RPSA, ESRRA, PTGR1, ZC3H18, JTB, VDAC2, LACTB2, FXR1, ARF1, FNBP4, ACAD11, PLCXD2, DPP3, GAS2L3, LIMA1, HTATIP2, TAF1D, TTC27, RPLP0P2, RTN3, MTHFD2, P…	0.00124514
	UP_TISSUE	Liver	ALDH8A1, BTD, VPS52, GFER, SYNCRIP, RPLP2, LPHN2, CLPTM1L, APP, MAP3K4, RPLP0, ACAA2, BSG, PCBD1, PTBP1, CYP1A2, UBE2J2, THY1, ERMAP, PPP1CA, CD163L1, HSD11B1, DKFZP779M0652, EIF2AK3, ACAA1, HLA-DRA, DNAH10, ADSS, HSD17B13, HSD17B12, PRRC1, ASL, ALDH4A1, SPP1, SPPL3, ACACA, PPAPDC1B, ATP11B, PIBF1, ACACB, GAS1, CAMK2N1, USF2, COL14A1, RGS3, LASP1, RGS5, FOXA2, CYP2C18, FOXA3, CWC15, GPLD1, GTSE1,…	0.0052767
HV
	UP_TISSUE	Brain	GDA, SCN3A, SCN3B, AMOTL1, SART3, AMOTL2, LPHN2, LPHN3, PIP5KL1, BTBD1, RPLP0, BTBD2, BTBD3, LRRC7, HIGD1A, LPHN1, TMEFF2, LRRC6, TMEFF1, SCN2B, SCN2A, BTBD7, SARS2, BTBD9, EGFLAM, TAGLN, HSD11B1, ADSL, HIGD2B, ORAI2, SCN1A, SCN1B, RALGPS1, CACNB1, CACNB2, CACNB3, CACNB4, ATN1, ZAP70, FAIM, DHX8, ACACA, PPAPDC1A, NXF1, ACACB, ZSCAN1, ZSCAN2, PARP3, ACAD11, PARP1, ACAD10, GFAP, NUAK1, KISS1R, CILP…	7.38992e-89
	UP_TISSUE	Epithelium	RPLP2, WTAP, AMOTL1, SART3, SART1, MAP3K7, MAK16, ZNF775, PPAPDC2, RPLP0, RPLP1, VPS4B, PDHA2, CCAR1, MCRS1, BSG, TFPT, CYP1A1, BRAF, ANKS3, PTBP1, UBE2J1, BSN, MARK2, JUP, EIF2AK1, RCC2, ASCC2, DHX29, SCYL1, PTRF, SIPA1L1, JUN, MYBBP1A, EIF2AK4, RALGPS2, SDAD1, OSTF1, DUSP10, CACNB1, GSTCD, RCC1, MYBL2, PFN1, PFN2, ATN1, SERF2, DHX57, DHX8, ZC3H14, DHX9, ZC3H13, ESRRA, ZC3H18, TAOK1, ACACA, NDC8…	8.3119e-56
	UP_TISSUE	Placenta	MEF2B, MEF2A, CDIPT, SCN3A, OSMR, VPS54, ASCC1, SYNCRIP, GFER, VPS53, WTAP, LOC400684, AMOTL2, SART1, ZNF775, PPAPDC3, DHX38, RPLP1, ZNF395, DHX30, DHX32, CCAR1, CYP1A1, BRAF, PTBP1, LRRC1, MARK3, MARK2, JUP, PPP1CA, EIF2AK1, EGFLAM, HSD11B2, EIF2AK2, MYBBP1A, SCN1B, DUSP12, DUSP18, PFN1, CKLF, ALDH4A1, SERF2, ARNTL2, NTHL1, SPP1, SPOP, ZC3H14, DHX9, ACER3, ESRRA, ZC3H15, TAOK1, PAIP2, PAIP1, TAO…	1.17875e-21
	UP_TISSUE	Uterus	MEF2A, PGAM1, SYNCRIP, REST, RPL22L1, WTAP, ITSN1, OGDH, SART3, MED20, SHKBP1, MAP3K7, CUL3, OGN, MAMSTR, SH3YL1, USP54, MAK16, RAE1, MED26, PIK3C3, ZNF397, LOC653653, JAGN1, DHX30, TBPL1, ARC, MCRS1, TFPT, KIF5B, OLFML2B, ZNF507, BTBD6, SERPING1, ZNF503, PKHD1L1, PROX2, ERMAP, ZNF788, RCC2, ASCC2, TAGLN, ZNF783, MED16, JUN, KIAA1524, PRKRIP1, MED18, PPP2R5E, CHORDC1, EIF2AK2, EIF2AK4, RAD23B, OR…	1.19069e-19
	UP_TISSUE	Eye	PPP2R5D, MED25, MED24, SYNCRIP, RORB, SART3, B2M, APP, TAF5L, MAP3K5, CUL7, RPLP1, PTBP2, CDH23, BSG, PDPN, PCID2, LIG1, MARK4, NCAPD3, SARS2, THY1, SSTR2, GLUL, MED15, SCYL1, MAPK3, ABAT, ADSL, MYBBP1A, ADSS, ZNF516, MTX2, CRTC1, RCC1, MYBL2, TMEM50B, SLC29A3, SLC29A2, LPCAT1, VWA5B2, KBTBD4, SLC29A4, AHNAK2, DHX57, LAPTM4B, ACER3, PAIP2, FOXRED2, ESRRG, ACACA, GARS, PIBF1, VDAC2, GAS7, RERG, TM…	4.07343e-18
	UP_TISSUE	Muscle	MEF2C, SCAF1, LDHB, KIFC1, XRCC3, RPL19, TUBB2B, RPL14, PGF, RP9, RORA, AMOTL1, KIAA0319L, OGDH, KIFC3, WDR74, ACTG1, INTS4, RPLP0, SH3BGR, ITFG1, CCAR1, MTERFD1, GATM, KIF5B, TADA2A, PCBD1, UBE2J1, MYLK2, CCDC137, PROX1, TOX2, WDR83, PPP1CA, GLUL, SERPINF1, PTRF, RCC2, ZWINT, ST14, EIF2S2, RYR1, RPS13, TGIF2, YME1L1, MAPK7, EIF2AK4, HIGD2A, TMEM121, HSPA1A, HSPA1B, DUSP11, RCC1, DIDO1, ACP1, ATP…	2.49496e-14
	UP_TISSUE	Lung	OXA1L, SYNCRIP, SNORA67, RADIL, WTAP, MAP3K7, ZNF777, MAP3K5, USP54, RPLP0, FOXF1, ZNF773, FOXF2, VPS4B, DHX34, PDHA2, ZNF394, PTBP2, TBPL1, HIGD1A, LPHN1, ACAA2, NDNL2, PTBP1, SIPA1L3, ZNF37A, JUP, ZNF787, PPP1CA, EGFLAM, PTRF, HACL1, CYP1B1, DNAH12, DNAH14, DUSP10, XAB2, ORAI3, T, PFN1, PFN2, DUSP14, KBTBD8, ISY1, ALDH4A1, SERF2, NTHL1, ESRRA, TAOK2, PPAPDC1B, DUSP23, JTB, DUSP22, NXF1, HBA1, F…	6.4726e-12
	UP_TISSUE	Skin	PDP1, VPS54, PGAM1, ZNF781, RPLP2, GFER, VPRBP, ITSN2, RADIL, SART3, AMOTL1, B2M, TMEM140, CUL3, MAP3K6, CUL2, USP54, MC1R, SERPINE2, BTBD2, MED27, VPS4B, LOC653653, ZNF394, TMEM14C, HIGD1A, CCAR1, TFPT, AIG1, PTBP1, EXD3, ZNF503, MYH9, PTPDC1, EIF2AK1, ASCC2, MED16, ASCC3, MED17, BACE2, MC2R, MAPK9, HIGD2A, CPSF3L, DCBLD2, PPP2R3A, HSD17B14, CHCHD1, PABPC4, CHCHD3, RER1, ARF6, CHCHD5, ARF5, ATP1…	1.06637e-10
	UP_TISSUE	Cervix carcinoma	XRCC5, ITGB3BP, RPL17, HRAS, XRCC3, XRCC2, HM13, RPL14, XRCC6, ASCC1, INTS1, SYNCRIP, MED24, MED23, H1FX, ZFP91, ACBD3, HIST1H2BK, CUL9, RPLP0, DHX33, RPL11, PTBP2, HIGD1A, CUL1, CLNS1A, PAN2, POLK, IKBKAP, KRR1, GTPBP4, PLD1, MCRS1, PAN3, POLH, RAN, EMG1, RCOR1, MTPAP, OPTN, MED13, GCC1, RAD1, JUP, DCLRE1C, RPS19, BAZ1A, SCYL1, MED15, ASCC2, SPAG5, ASCC3, MED16, MED17, RYR3, SERBP1, NLE1, RPS12,…	1.90313e-09
	UP_TISSUE	Platelet	PEAR1, LTBP1, C6ORF25, PTGS1, MAP3K7, PGR, ACTG1, ACBD3, MAP3K5, ERO1LB, APP, RPLP1, VPS4B, PDHA2, RAB27B, GNG5, SYK, YARS, BCL2L14, TNIK, MYH9, MARK2, ST13, MAPK1, PPP1CA, RPS14, FLII, PELO, GRAP2, MYO18A, SH3GL1, LY6G6F, OSTF1, NAGK, HADHB, DTD1, LOC407835, PPP1R3D, CDC42EP1, UBASH3B, RCHY1, GIT1, GPD2, NPLOC4, TAOK1, MAP2K2, HBA1, VDAC2, SEPT11, EMILIN1, VDAC1, LASP1, MAP4, SLC9A1, LIMA1, PDIA…	1.37826e-08
	UP_TISSUE	Lymph	XRCC3, VKORC1L1, SURF6, RPL13, PGAM1, NAA15, INTS1, SGMS1, WDR81, RUNDC1, FLI1, MAT1A, RPLP0, DHX30, SYK, DDRGK1, RCOR1, ZHX2, ERGIC1, NME6, TMEM134, ZNF789, ZWINT, SMARCAL1, MAPK3, ZZZ3, RPS10, ACAA1, CPSF3L, HADHA, KIAA1009, RPS26, LYL1, C1ORF50, ZNF799, TMEM123, CDC123, HLA-DOA, RECQL4, ODC1, RPSA, UNC119, SPNS3, SPHK2, C15ORF39, NDC80, FXR2, FNIP2, LOC648987, SYNE1, NAA40, MAP4, POP4, C19ORF1…	1.66038e-07
	UP_TISSUE	Kidney	CTHRC1, OXA1L, BTD, AURKAIP1, SCN3A, VKORC1L1, CRHBP, PPP2R5D, RPLP2, RORC, SYNCRIP, MED21, ITSN1, AMOTL2, TMEM141, CUL2, ZNF777, EPC2, PGAM5, ZNF396, ZNF394, VNN2, DHX32, IKBKAP, PCBD2, GATM, PDPN, LRRC2, CRTAP, KIF5C, USHBP1, SCYL3, LPCAT2, MECOM, MARK2, EGFLAM, MED15, CD320, HSD11B2, PMP22, UNC13B, KLRC1, SH3GL1, HSD17B11, OSTF1, SCN1B, PABPC4, NFKBIA, FAM19A1, ATP12A, VPS72, SCRIB, KBTBD2, AR…	2.19064e-07
	UP_TISSUE	Fetal brain	MEF2C, MASP1, PPP2R5B, PPP2R5D, PPP2R5C, ITSN2, SART3, ITSN1, APP, GRIN2B, GRIN2D, ZNF394, TIGD7, MAP2K5, TMEM14A, SH3GL3, INA, IKBKAP, CGRRF1, NODAL, CRTAP, PTPRS, DCDC2, C10ORF2, DCDC1, RYR3, FOXG1, ZGLP1, PPP2R5E, MADCAM1, MAPK8, YME1L1, MAPK7, EIF2AK3, SH3GL2, ADAMTS5, SH3GL1, HSPBAP1, PPP2R3A, ERBB4, MIPOL1, C15ORF27, NFKBIE, CACNB2, TRPT1, CACNB3, DAAM1, KCNJ2, DTD1, PPP1R3E, DUSP18, ARIH1,…	5.76004e-07
	UP_TISSUE	Fetal brain cortex	LDHB, TUBB2B, SNCB, TUBB2A, SNCA, PGAM1, CCT2, MC1R, RPLP0, DDAH2, DDAH1, INA, DCTN2, ST13, NME2, PGLS, EGFLAM, NME1, DBN1, ALDOA, FUS, LMNB1, LMNB2, HSPA1A, HSPA1B, CALR, ACAT2, TAGLN3, ACAT1, HNRNPA3, PEA15, PFN2, TPI1, CRMP1, IDH1, RPSA, LGALS1, PHB, VDAC2, HNRNPA1, SEPT11, PPA1, VDAC1, HYOU1, CCT5, ARF1, RABEP1, HEBP2, TMOD2, PCNA, CRYM, GFAP, SEPHS1, PDIA3, ATP5B, CKB, EFHD2, HSPH1, RBM4B, M…	8.16002e-06
	UP_TISSUE	Cajal-Retzius cell	LDHB, SEPT2, TUBB2B, TUBB2A, PITPNA, CAPZA2, PGAM1, EIF5A, CBX3, SYNCRIP, SELENBP1, CCT2, CBX1, CCT3, ACTG1, GSTM2, HIST1H2BM, MC1R, TARDBP, AKR7A2, DDAH2, DDAH1, INA, TXNL1, RAN, HNRNPA2B1, ERP29, PDXP, EEF2, PSMA2, PSMA1, NME2, PGLS, PA2G4, NME1, STMN1, MDH1, MPST, ALDOA, LMNB1, STRAP, GRB2, GLUD1, HSPA1A, STIP1, HSPA1B, CALR, PSMA7, NAGK, ACAT2, ACP1, CAPZB, TAGLN3, HNRNPA3, HNRNPL, TUBB, TPI1…	2.55974e-05
	UP_TISSUE	Ovary	SLC9A9, SLC2A4RG, PLEKHM2, RPL14, BTC, ASCC1, PGAM1, NAA15, RPLP2, RCE1, CCDC146, ZNF251, ACBD4, CUL3, ACTG1, SHKBP1, CLPTM1L, ACBD3, TMEM147, ZNF777, DIRAS2, CLK2, INTS4, PPP1R1B, BTBD2, CH25H, HIST1H2BI, YEATS2, RPL12, TRAPPC2P1, ITFG2, ITFG3, SYK, GBP5, ZNF44, PCID2, RXRA, PTBP1, SIPA1L2, COLEC11, UBE2J2, MARK4, LPCAT4, BCL2L10, OGFOD1, ADAMTS7, MKS1, NPC2, EIF2AK1, JUN, RPS14, HSD11B2, ACAA1,…	0.000140439
	UP_TISSUE	Bone marrow	XRCC4, LDHA, PPP2R5D, PPP2R5C, MED24, SNORA67, CLK1, MYLIP, ITSN2, SART3, OGDH, WTAP, ITSN1, ZNF253, HMHA1, HIST1H2BN, MAP3K4, FLI1, CUL7, DHX38, LSM5, GIT2, DHX34, TLK1, MTERFD3, HIGD1A, ADAM9, KRR1, OPA1, ZNF644, RCOR1, ESPL1, SPIRE1, NCAPD3, TMEM131, NCAPD2, BTBD8, CTDSPL2, RAD1, TMEM135, GRB10, EIF2AK1, TAGLN, BACE2, FCHSD2, VGLL4, CHORDC1, PLEKHM1P, HSD17B11, ORAI1, OSTF1, ATP5SL, ZNF516, MY…	0.000187566
	UP_TISSUE	Melanoma	MOCOS, FASTKD2, VKORC1L1, RNF213, WDR81, HMCN1, RAVER2, ZFP90, FAP, CDCA2, DHX33, FAM103A1, ESCO1, PTPRK, CRLS1, ZNF48, UGCG, EXD2, CCR6, RCC2, MED15, ASCC3, KIAA1524, ZNF786, ADAMTS1, CDCA7L, ANAPC7, EIF2AK4, SUPT6H, C7ORF60, ENPP2, DHFRL1, XAB2, PDSS2, AGGF1, STX17, AHNAK2, MAML3, SNRNP35, OR2C3, MGAT4B, GIT1, NPLOC4, SMYD3, MCAM, ZNF526, EPHA3, GPR153, PARP8, C19ORF12, ABCF1, NIF3L1, CRNKL1, V…	0.00105125
	UP_TISSUE	Liver	BTD, VPS52, GFER, SYNCRIP, RPLP2, LPHN2, CLPTM1L, OGN, APP, MAP3K4, RPLP0, VPS4B, VNN3, ACAA2, BSG, BRAF, PCBD1, PTBP1, CYP1A2, UBE2J2, THY1, ERMAP, PPP1CA, HSD11B1, DKFZP779M0652, EIF2AK3, ACAA1, HLA-DRA, HSD17B11, DNAH10, ADSS, OSTF1, SDAD1, HSD17B13, HSD17B12, PRRC1, ASL, DUSP19, KLKB1, ALDH4A1, SPP1, SPPL3, ACACA, PPAPDC1B, ATP11B, PIBF1, ACACB, GAS1, USF2, CAMK2N1, COL14A1, LASP1, RGS5, CYP2…	0.00161947
	UP_TISSUE	Colon	GDA, OSMR, PPP2R5D, LDHD, VPS52, RORC, CLPTM1L, LPHN3, ISG15, BTBD2, RPLP0, FOXF1, PATZ1, ZNF394, CDH24, DHX32, TMEFF2, LRRC2, VPS45, LPCAT3, LPCAT4, MARK2, GLUL, ASCC2, ZWINT, MED18, HLA-DRA, CPSF3L, HSD17B11, HACL1, CRTC1, CHCHD2, CHCHD4, SLC29A1, SH3BP5L, PFN1, KLKB1, RAC1, NAT10, DHX58, ESRRA, ZNF529, FOXRED2, ATP11B, ZNF524, SEPT11, CYP7B1, CDC42BPG, FAM151A, PKP3, AKNAD1, PARP8, CDC42BPA, B…	0.00508306
	UP_TISSUE	Amygdala	FLYWCH1, MEF2A, C21ORF128, SCN3B, RUSC1, CCDC149, INTS3, CLK1, KIAA0319L, WTAP, FLJ22184, OGN, APP, RUNDC1, PGPEP1, USP54, CUL9, AIF1L, TLK1, RPL11, SMOX, TIGD6, ITFG3, LRRC7, GNG7, NWD1, TMEFF1, ZNF506, TMIE, BTBD7, PTPRR, ZNF649, TMEM130, PTPDC1, TMEM132D, BTBD9, TMEM132C, THY1, C1ORF86, EIF2AK1, DHX29, SIPA1L1, EIF2S2, SLC30A10, MYBBP1A, MYO18A, DBNDD1, ZNF611, PCDH20, RHPN2, RER1, FAM19A2, FA…	0.00944303
	UP_TISSUE	Trachea	DLC1, HGSNAT, MASP1, STOML3, OGDH, FAM92B, B2M, VPS13C, WDR78, WWP2, C1ORF106, RSPH3, AIF1L, ERAP2, CHRNA7, MRPL32, FHAD1, OXR1, CRISP3, GBP6, RRP7B, CYP1A1, DUOXA1, RRP7A, PLD5, UGCG, MATN1, APOLD1, CDHR3, UBR3, TC2N, CTNNA3, ACAP3, LPAR6, PARP14, CCR2, PDGFRA, TMEM184A, PIAS1, GLG1, TP53TG1, DNAH12, GCNT2, NEK3, LOC400891, PFKFB2, HSD17B13, STK17B, ARF6, ZNF619, ATP12A, ZNF615, PUS7, THTPA, MAC…	0.0231825
	UP_TISSUE	Heart	XRCC5, DLC1, MEF2B, MEF2A, CDIPT, LTBP4, PGD, XRCC6, NAA15, SELENBP1, RADIL, CCDC141, WDR72, PPP1R1C, SH3BGR, ZNF107, VPS4A, C15ORF56, MAP2K7, IBTK, SCN2B, CRYAB, C16ORF62, KIAA1804, HMG20B, SERPING1, VPS41, ZUFSP, CCDC132, PITPNM2, WDR89, ADAMTS1, ATPIF1, CHORDC1, SCN1B, C15ORF26, MIPOL1, CACNB1, CACNB2, PRRC1, MTIF2, KCNJ2, HADHB, PEA15, CDC42EP2, RPS27, SLC29A2, CDC42EP3, NUDC, UNC45A, ZNF528,…	0.0240559
	UP_TISSUE	Cervix	TGOLN2, PLEKHM2, RPL13, ZNF57, RPL15, INTS3, ZNF638, HMHA1, HIST1H2BK, CLK3, PGAM5, RPLP0, ILK, PHTF1, C9ORF43, TYRO3, CYP1A1, TTC7A, MARK3, ERGIC2, DCAF5, AQR, MED15, ZNF786, TMPRSS11B, SH3GL1, ACP6, CHCHD3, ZNF511, ASL, MTIF3, NPHP3, PVRL3, C19ORF24, SPOP, ZNF622, RPSA, ESRRA, ZC3H18, JTB, VDAC2, LACTB2, FXR1, ARF1, FNBP4, ACAD11, PLCXD2, DPP3, GAS2L3, LIMA1, HTATIP2, TAF1D, TTC27, RTN3, MTHFD2…	0.0320228
	UP_TISSUE	Colon carcinoma	RNASEL, CDX1, CDX2, OCLN, ALDH1L1, CNDP2, U2AF2, FAM110B, CDKN2AIPNL, TSPAN8, CBX8, IQGAP1, SLC35A3, CUL3, ST3GAL4, SRRM2, SND1, WDR77, SRRM1, RAB21, CLNS1A, BRAF, PTBP1, QDPR, CTNNA1, PYCR1, PYCR2, PPP1CA, RPS18, KRT18, NAPEPLD, RAB19, GTF2IRD1, PDE5A, LRRC66, VGLL3, RAB10, LRPPRC, ALDOA, TNFRSF6B, TSHZ1, AHCY, COPZ1, PTK7, UBE2V2, BCL2L1, CHEK2, CALR, LOC407835, TPI1, GADD45GIP1, PSMB6, KRAS, H…	0.0478271
