# Supplementary material for: H3K4me1 marks DNA regions hypomethylated during aging in human stem and differentiated cells
Source: HighWire-hosted journal article supplement (doi:10.1101/gr.169011.113), 2014-09-30
Supplement: Supplemental_Table_13.xlsx [file Supplemental_Table_13.xlsx]

## Sheet: ST13
Supplemental Table 13: GO (top 20) of the genes established according to the behaviour of blood DNA methylation variance during aging.
	GO ID	Term	FDR
Convergent
	GO:0007399	nervous system development	3.2136e-25
	GO:0007275	multicellular organismal development	9.6408e-25
	GO:0048856	anatomical structure development	1.12064e-24
	GO:0048731	system development	3.2136e-24
	GO:0009653	anatomical structure morphogenesis	3.4608e-23
	GO:0032502	developmental process	3.4608e-23
	GO:0044707	single-multicellular organism process	1.05943e-22
	GO:0032501	multicellular organismal process	1.6686e-22
	GO:0044767	single-organism developmental process	1.04373e-20
	GO:0048468	cell development	9.3936e-20
	GO:0022008	neurogenesis	4.944e-19
	GO:0030154	cell differentiation	6.18e-19
	GO:0048699	generation of neurons	1.82548e-18
	GO:0030182	neuron differentiation	1.87166e-18
	GO:0009887	organ morphogenesis	1.2978e-17
	GO:0045165	cell fate commitment	1.2978e-17
	GO:0048513	organ development	3.48988e-17
	GO:0048869	cellular developmental process	4.12e-17
	GO:0007156	homophilic cell adhesion	4.16337e-16
	GO:0035637	multicellular organismal signaling	1.45848e-15
Divergent
	GO:0007399	nervous system development	0
	GO:0048731	system development	0
	GO:0048856	anatomical structure development	0
	GO:0022008	neurogenesis	0
	GO:0007275	multicellular organismal development	0
	GO:0019226	transmission of nerve impulse	0
	GO:0007268	synaptic transmission	0
	GO:0035637	multicellular organismal signaling	0
	GO:0048699	generation of neurons	6.4168e-27
	GO:0032502	developmental process	2.9616e-25
	GO:0007267	cell-cell signaling	2.9616e-25
	GO:0030182	neuron differentiation	2.9616e-25
	GO:0044707	single-multicellular organism process	1.67824e-24
	GO:0032501	multicellular organismal process	5.21806e-24
	GO:0048468	cell development	5.21806e-24
	GO:0050877	neurological system process	8.22667e-23
	GO:0009653	anatomical structure morphogenesis	8.22667e-23
	GO:0044767	single-organism developmental process	4.936e-22
	GO:0048869	cellular developmental process	3.81418e-21
	GO:0030154	cell differentiation	4.52467e-21
LV
	GO:0009987	cellular process	6.9216e-17
	GO:0071840	cellular component organization or bioge...	3.4608e-14
	GO:0016043	cellular component organization	3.7904e-14
	GO:0051641	cellular localization	3.2136e-12
	GO:0043412	macromolecule modification	7.21824e-12
	GO:0044267	cellular protein metabolic process	8.24e-12
	GO:0006464	cellular protein modification process	1.0506e-11
	GO:0036211	protein modification process	1.0506e-11
	GO:0044237	cellular metabolic process	3.57067e-11
	GO:0048523	negative regulation of cellular process	1.12364e-10
	GO:0051179	localization	1.12364e-10
	GO:0006796	phosphate-containing compound metabolic ...	2.472e-10
	GO:0048519	negative regulation of biological proces...	3.17829e-10
	GO:0016192	vesicle-mediated transport	3.17829e-10
	GO:0070727	cellular macromolecule localization	3.6256e-10
	GO:0051649	establishment of localization in cell	3.78071e-10
	GO:0006793	phosphorus metabolic process	3.78071e-10
	GO:0046907	intracellular transport	4.66933e-10
	GO:0034613	cellular protein localization	4.68379e-10
	GO:0044763	single-organism cellular process	5.4384e-10
HV
	GO:0044260	cellular macromolecule metabolic process	0
	GO:0044237	cellular metabolic process	0
	GO:0009987	cellular process	1.80383e-24
	GO:0006139	nucleobase-containing compound metabolic...	1.80383e-24
	GO:0007049	cell cycle	2.2239e-24
	GO:0071840	cellular component organization or bioge...	2.2239e-24
	GO:0016043	cellular component organization	1.38376e-23
	GO:0046483	heterocycle metabolic process	6.83643e-23
	GO:0022402	cell cycle process	7.06e-23
	GO:0010467	gene expression	1.9768e-22
	GO:0006725	cellular aromatic compound metabolic pro...	4.55762e-22
	GO:0034641	cellular nitrogen compound metabolic pro...	8.8956e-22
	GO:0090304	nucleic acid metabolic process	1.07825e-21
	GO:0043170	macromolecule metabolic process	3.00638e-21
	GO:0034645	cellular macromolecule biosynthetic proc...	9.12369e-21
	GO:0016070	RNA metabolic process	8.825e-20
	GO:0009059	macromolecule biosynthetic process	1.38376e-18
	GO:0006807	nitrogen compound metabolic process	1.85325e-18
	GO:0006996	organelle organization	2.03494e-18
	GO:0044238	primary metabolic process	2.27881e-18
