# Supplementary material for: H3K4me1 marks DNA regions hypomethylated during aging in human stem and differentiated cells
Source: HighWire-hosted journal article supplement (doi:10.1101/gr.169011.113), 2014-09-30
Supplement: Supplemental_Table_14.xlsx [file Supplemental_Table_14.xlsx]

## Sheet: ST14
Supplemental Table 14: List of CpG sites where the Euclidean distance (ED) between MZ twins increased (> 2-fold) with age
Target ID	Chromosome	start	end	nearest.gene	nearest.gene.id	disttotss	hmm.cpgi	prom.reg	intra.reg	inter.reg
cg00001583	chr1	200011786	200011787	NR5A2	2494	15015	CGI	TRUE	TRUE	FALSE
cg00007036	chr1	33742089	33742090	ZNF362	149076	19914	CGI	FALSE	TRUE	FALSE
cg00026222	chr1	2144244	2144245	C1orf86	199990	-5071	CGI	FALSE	FALSE	TRUE
cg00031456	chr1	109234919	109234920	PRPF38B	55119	-11	CGI	TRUE	FALSE	FALSE
cg00035249	chr1	228270481	228270482	ARF1	375	119	CGI	TRUE	TRUE	FALSE
cg00036263	chr1	245852353	245852354	KIF26B	55083	534065	CGI	FALSE	TRUE	FALSE
cg00069860	chr1	44883227	44883228	RNF220	55182	12266	CGI	FALSE	TRUE	FALSE
cg00102714	chr1	207925343	207925344	CD46	4179	-38	CGI	TRUE	FALSE	FALSE
cg00113194	chr1	884869	884870	NOC2L	26155	9808	CGI-N-Shore	FALSE	TRUE	FALSE
cg00116430	chr1	94188268	94188269	MIR760	100126348	-124118	Non-CGI	FALSE	TRUE	FALSE
cg00157179	chr1	2383687	2383688	PLCH2	9651	-24065	CGI-S-Shelf	FALSE	FALSE	TRUE
cg00172330	chr1	28052294	28052295	FAM76A	199870	-194	CGI	TRUE	FALSE	FALSE
cg00173141	chr1	210466172	210466173	HHAT	55733	-35422	CGI	FALSE	FALSE	TRUE
cg00254532	chr1	155243310	155243311	HCN3	57657	-4062	CGI	TRUE	TRUE	FALSE
cg00256155	chr1	47915647	47915648	FOXD2	2306	13957	CGI	FALSE	FALSE	TRUE
cg00329300	chr1	161008462	161008463	TSTD1	100131187	310	CGI	FALSE	TRUE	FALSE
cg00345792	chr1	27877772	27877773	AHDC1	27245	52587	CGI	TRUE	TRUE	FALSE
cg00349061	chr1	26371865	26371866	SLC30A2	7780	737	CGI-N-Shore	FALSE	TRUE	FALSE
cg00371368	chr1	239550378	239550379	CHRM3	1131	512	CGI	TRUE	FALSE	FALSE
cg00397635	chr1	53309162	53309163	ZYG11A	440590	978	CGI	FALSE	TRUE	FALSE
cg00418071	chr1	86073001	86073002	CYR61	3491	26556	Non-CGI	FALSE	FALSE	TRUE
cg00426822	chr1	39546536	39546537	MACF1	23499	-551	CGI-N-Shore	TRUE	FALSE	FALSE
cg00564737	chr1	196847182	196847183	CFHR2	3080	-65750	CGI-N-Shore	FALSE	TRUE	FALSE
cg00565688	chr1	3568212	3568213	TP73	7161	-915	CGI	TRUE	FALSE	FALSE
cg00570896	chr1	51443449	51443450	CDKN2C	1031	9840	CGI	FALSE	FALSE	TRUE
cg00659878	chr1	229706242	229706243	ABCB10	23456	-11799	Non-CGI	FALSE	FALSE	TRUE
cg00691240	chr1	52498502	52498503	KTI12	112970	968	CGI	TRUE	TRUE	FALSE
cg00754103	chr1	165910821	165910822	MIR3658	100500832	33662	CGI	FALSE	FALSE	TRUE
cg00756215	chr1	55230057	55230058	PARS2	25973	167	CGI	FALSE	TRUE	FALSE
cg00764612	chr1	150255213	150255214	C1orf51	148523	259	CGI	TRUE	TRUE	FALSE
cg00772714	chr1	15479360	15479361	TMEM51	55092	331	CGI	TRUE	TRUE	FALSE
cg00777636	chr1	6446216	6446217	ACOT7	11332	7608	Non-CGI	TRUE	TRUE	FALSE
cg00778905	chr1	3541386	3541387	TPRG1L	127262	-168	CGI	TRUE	FALSE	FALSE
cg00787537	chr1	211307839	211307840	KCNH1	3756	-381	CGI-S-Shore	TRUE	FALSE	FALSE
cg00812299	chr1	61508853	61508854	NFIA	4774	-34091	CGI	FALSE	FALSE	TRUE
cg00851154	chr1	26690578	26690579	ZNF683	257101	8686	CGI-S-Shelf	FALSE	TRUE	FALSE
cg00889627	chr1	1959630	1959631	GABRD	2563	8861	CGI	FALSE	TRUE	FALSE
cg00891176	chr1	201082731	201082732	CACNA1S	779	-1036	CGI-N-Shore	TRUE	FALSE	FALSE
cg00894697	chr1	20826246	20826247	MUL1	79594	8426	CGI-N-Shore	FALSE	TRUE	FALSE
cg00929392	chr1	19283191	19283192	IFFO2	126917	-364	CGI	TRUE	FALSE	FALSE
cg00931619	chr1	6052495	6052496	NPHP4	261734	36	CGI	TRUE	FALSE	FALSE
cg00941229	chr1	149982400	149982401	OTUD7B	56957	284	CGI	TRUE	FALSE	FALSE
cg00951395	chr1	232941775	232941776	MAP10	54627	1136	CGI-S-Shore	TRUE	FALSE	FALSE
cg00959725	chr1	33282965	33282966	S100PBP	64766	-76	CGI	TRUE	FALSE	FALSE
cg00969680	chr1	113466087	113466088	AKR7A2P1	246182	114	CGI	TRUE	TRUE	FALSE
cg00970752	chr1	15711443	15711444	EFHD2	79180	-24946	Non-CGI	FALSE	TRUE	FALSE
cg00987080	chr1	32930837	32930838	ZBTB8A	653121	178	CGI	FALSE	TRUE	FALSE
cg00988148	chr1	179555635	179555636	TDRD5	163589	-5111	CGI	FALSE	FALSE	TRUE
cg00997310	chr1	3789280	3789281	DFFB	1677	15434	CGI-N-Shore	FALSE	TRUE	FALSE
cg01065413	chr1	222791514	222791515	MIA3	375056	69	CGI	TRUE	FALSE	FALSE
cg01074657	chr1	78511466	78511467	GIPC2	54810	-121	CGI	TRUE	FALSE	FALSE
cg01079738	chr1	182922427	182922428	SHCBP1L	81626	124	CGI	TRUE	FALSE	FALSE
cg01103597	chr1	25242147	25242148	RUNX3	864	49463	CGI-S-Shore	FALSE	TRUE	FALSE
cg01134183	chr1	46860260	46860261	FAAH	2166	320	CGI	FALSE	TRUE	FALSE
cg01395650	chr1	197170599	197170600	CRB1	23418	6	CGI	TRUE	FALSE	FALSE
cg01398941	chr1	55271902	55271903	C1orf177	163747	165	CGI	FALSE	TRUE	FALSE
cg01411786	chr1	201709390	201709391	MIR1231	100302158	-68347	CGI	FALSE	TRUE	FALSE
cg01430725	chr1	36930006	36930007	MRPS15	64960	32	CGI	TRUE	FALSE	FALSE
cg01444643	chr1	55504848	55504849	PCSK9	255738	-299	CGI-N-Shore	TRUE	FALSE	FALSE
cg01550055	chr1	119543216	119543217	TBX15	6913	-11036	CGI	FALSE	FALSE	TRUE
cg01566242	chr1	150266242	150266243	MRPS21	54460	-25	CGI	TRUE	FALSE	FALSE
cg01712692	chr1	240986708	240986709	GREM2	64388	-211245	CGI	FALSE	TRUE	FALSE
cg01716680	chr1	35259750	35259751	GJA4	2701	1578	CGI-S-Shore	TRUE	TRUE	FALSE
cg01728493	chr1	17866589	17866590	ARHGEF10L	55160	258	CGI	FALSE	TRUE	FALSE
cg01780585	chr1	36348359	36348360	2001-08-01	26523	12949	CGI-N-Shore	TRUE	TRUE	FALSE
cg01782790	chr1	163393050	163393051	NUF2	83540	101326	CGI-S-Shore	FALSE	FALSE	TRUE
cg01905589	chr1	26856408	26856409	RPS6KA1	6195	158	CGI	TRUE	FALSE	FALSE
cg01924755	chr1	45805834	45805835	MUTYH	4595	306	CGI	TRUE	TRUE	FALSE
cg01928145	chr1	28282258	28282259	XKR8	55113	-4244	CGI-N-Shelf	FALSE	TRUE	FALSE
cg01972394	chr1	19229528	19229529	ALDH4A1	8659	-234	CGI	TRUE	FALSE	FALSE
cg02100343	chr1	31538517	31538518	PUM1	9698	244	CGI	TRUE	TRUE	FALSE
cg02275243	chr1	5920514	5920515	MIR4689	100616421	2285	CGI-S-Shore	FALSE	FALSE	TRUE
cg02276822	chr1	3559697	3559698	WRAP73	49856	6972	CGI	FALSE	TRUE	FALSE
cg02296931	chr1	1144658	1144659	TNFRSF18	8784	-2568	CGI	FALSE	FALSE	TRUE
cg02338271	chr1	171868115	171868116	DNM3	26052	57493	Non-CGI	FALSE	TRUE	FALSE
cg02356786	chr1	243265016	243265017	LOC731275	731275	28	CGI	TRUE	FALSE	FALSE
cg02395396	chr1	52435307	52435308	RAB3B	5865	21127	Non-CGI	FALSE	TRUE	FALSE
cg02448276	chr1	11845238	11845239	MTHFR	4524	20920	Non-CGI	FALSE	TRUE	FALSE
cg02572448	chr1	8763403	8763404	RERE	473	114294	CGI	FALSE	TRUE	FALSE
cg02574421	chr1	17306627	17306628	MFAP2	4237	1452	CGI	FALSE	TRUE	FALSE
cg02586249	chr1	45452521	45452522	EIF2B3	8891	-159	CGI-S-Shore	TRUE	FALSE	FALSE
cg02620307	chr1	161283965	161283966	SDHC	6391	-199	CGI	TRUE	FALSE	FALSE
cg02623028	chr1	23003569	23003570	C1QB	713	23886	CGI	FALSE	FALSE	TRUE
cg02624558	chr1	202777611	202777612	KDM5B	10765	-61	CGI	TRUE	FALSE	FALSE
cg02633690	chr1	235667903	235667904	B3GALNT2	148789	-121	CGI	TRUE	FALSE	FALSE
cg02638691	chr1	209849185	209849186	G0S2	50486	514	CGI	TRUE	TRUE	FALSE
cg02666627	chr1	18931477	18931478	PAX7	5081	-26021	CGI	FALSE	FALSE	TRUE
cg02711976	chr1	36023590	36023591	KIAA0319L	79932	-38	CGI	TRUE	TRUE	FALSE
cg02892286	chr1	214153377	214153378	PROX1	5629	-7907	CGI	FALSE	FALSE	TRUE
cg02899039	chr1	249152378	249152379	ZNF692	55657	935	CGI-N-Shore	TRUE	TRUE	FALSE
cg02900441	chr1	15911134	15911135	AGMAT	79814	469	CGI-N-Shore	FALSE	TRUE	FALSE
cg02927682	chr1	54844424	54844425	SSBP3	23648	27666	Non-CGI	FALSE	TRUE	FALSE
cg02928797	chr1	6566337	6566338	PLEKHG5	57449	13730	CGI	FALSE	TRUE	FALSE
cg02933679	chr1	13910224	13910225	PDPN	10630	-26	CGI	TRUE	FALSE	FALSE
cg02935904	chr1	55267293	55267294	TTC22	55001	-351	CGI-S-Shore	TRUE	FALSE	FALSE
cg02974126	chr1	10092691	10092692	UBE4B	10277	-348	CGI	TRUE	FALSE	FALSE
cg03043663	chr1	2344561	2344562	PEX10	5192	-550	CGI	TRUE	FALSE	FALSE
cg03075534	chr1	240161447	240161448	RPS7P5	645884	-9375	CGI	FALSE	FALSE	TRUE
cg03102494	chr1	147801721	147801722	PPIAL4B	653505	153696	CGI	FALSE	TRUE	FALSE
cg03111285	chr1	230561693	230561694	PGBD5	79605	-48301	CGI	FALSE	FALSE	TRUE
cg03112680	chr1	178063192	178063193	RASAL2-AS1	100302401	-63	CGI	TRUE	FALSE	FALSE
cg03130248	chr1	245524538	245524539	KIF26B	55083	206250	CGI	FALSE	TRUE	FALSE
cg03132197	chr1	28696105	28696106	PHACTR4	65979	11	CGI-N-Shore	TRUE	FALSE	FALSE
cg03133876	chr1	16532990	16532991	ARHGEF19	128272	6112	CGI	FALSE	TRUE	FALSE
cg03189756	chr1	241803820	241803821	OPN3	23596	-118	CGI	TRUE	FALSE	FALSE
cg03226554	chr1	28573817	28573818	ATPIF1	93974	11214	CGI	FALSE	FALSE	TRUE
cg03254465	chr1	3240227	3240228	ARHGEF16	27237	-130918	CGI	FALSE	TRUE	FALSE
cg03342366	chr1	47184735	47184736	EFCAB14	9813	0	CGI	TRUE	FALSE	FALSE
cg03347170	chr1	27648560	27648561	TMEM222	84065	-74	CGI	TRUE	FALSE	FALSE
cg03397389	chr1	36397003	36397004	2003-08-01	192669	683	CGI	TRUE	TRUE	FALSE
cg03425468	chr1	155164676	155164677	MIR92B	693235	-290	CGI	TRUE	FALSE	FALSE
cg03427058	chr1	1565025	1565026	MMP23B	8510	-2533	CGI	TRUE	TRUE	FALSE
cg03525385	chr1	112438746	112438747	KCND3	3752	93029	CGI	FALSE	TRUE	FALSE
cg03526459	chr1	146549940	146549941	LOC728989	728989	-35340	CGI	TRUE	FALSE	FALSE
cg03526503	chr1	28198483	28198484	THEMIS2	9473	-570	CGI-N-Shore	TRUE	FALSE	FALSE
cg03530210	chr1	109584673	109584674	WDR47	22911	175	CGI	TRUE	FALSE	FALSE
cg03587150	chr1	154193741	154193742	C1orf43	25912	-467	CGI	TRUE	TRUE	FALSE
cg03605784	chr1	31769832	31769833	ZCCHC17	51538	-8	CGI	TRUE	FALSE	FALSE
cg03752218	chr1	47696788	47696789	TAL1	6886	1102	CGI	TRUE	TRUE	FALSE
cg03763387	chr1	182808220	182808221	DHX9	1660	-217	CGI	TRUE	FALSE	FALSE
cg03769927	chr1	27480849	27480850	SLC9A1	6548	600	CGI-S-Shore	TRUE	FALSE	FALSE
cg03769939	chr1	25254129	25254130	RUNX3	864	37481	CGI-N-Shore	FALSE	TRUE	FALSE
cg03771099	chr1	1917911	1917912	KIAA1751	85452	17363	CGI-S-Shore	FALSE	TRUE	FALSE
cg03971454	chr1	43770557	43770558	TIE1	7075	3990	CGI-N-Shore	TRUE	TRUE	FALSE
cg03973866	chr1	16270229	16270230	ZBTB17	7709	32396	CGI	FALSE	TRUE	FALSE
cg03984347	chr1	45190262	45190263	KIF2C	11004	-15226	CGI	FALSE	TRUE	FALSE
cg03987199	chr1	29189655	29189656	EPB41	2035	-23946	CGI	FALSE	TRUE	FALSE
cg04012515	chr1	1911386	1911387	KIAA1751	85452	23888	CGI	FALSE	TRUE	FALSE
cg04025150	chr1	34642862	34642863	C1orf94	84970	10237	CGI	TRUE	TRUE	FALSE
cg04028570	chr1	248100427	248100428	OR2L13	284521	-64	CGI	TRUE	FALSE	FALSE
cg04078980	chr1	228291486	228291487	C1orf35	79169	-463	CGI-S-Shore	TRUE	FALSE	FALSE
cg04102734	chr1	209406725	209406726	MIR205HG	642587	-195441	CGI	FALSE	FALSE	TRUE
cg04125625	chr1	29564120	29564121	PTPRU	10076	1091	CGI	FALSE	TRUE	FALSE
cg04138112	chr1	167090618	167090619	DUSP27	92235	26546	CGI-N-Shore	FALSE	TRUE	FALSE
cg04143909	chr1	234367322	234367323	MIR4671	100616380	-74889	CGI	FALSE	TRUE	FALSE
cg04166042	chr1	50896246	50896247	DMRTA2	63950	-7126	CGI-S-Shelf	FALSE	FALSE	TRUE
cg04279832	chr1	3548991	3548992	TPRG1L	127262	7434	CGI	FALSE	TRUE	FALSE
cg04312406	chr1	226497240	226497241	LIN9	286826	314	CGI	TRUE	TRUE	FALSE
cg04363624	chr1	47697965	47697966	TAL1	6886	-72	CGI	TRUE	TRUE	FALSE
cg04392971	chr1	161369648	161369649	C1orf192	257177	-31983	CGI	TRUE	FALSE	FALSE
cg04400972	chr1	117665053	117665054	TRIM45	80263	-641	CGI	TRUE	FALSE	FALSE
cg04484550	chr1	2980163	2980164	FLJ42875	440556	185	CGI	TRUE	FALSE	FALSE
cg04484947	chr1	32931323	32931324	ZBTB8A	653121	664	CGI-S-Shore	FALSE	TRUE	FALSE
cg04486873	chr1	34644252	34644253	C1orf94	84970	11627	CGI-S-Shore	FALSE	TRUE	FALSE
cg04501188	chr1	47904171	47904172	FOXD2	2306	2481	CGI	TRUE	FALSE	FALSE
cg04504182	chr1	202777459	202777460	KDM5B	10765	88	CGI	TRUE	FALSE	FALSE
cg04510788	chr1	37498900	37498901	GRIK3	2899	942	CGI	FALSE	TRUE	FALSE
cg04552470	chr1	20669792	20669793	VWA5B1	127731	52379	CGI	FALSE	TRUE	FALSE
cg04703227	chr1	19923504	19923505	C1orf151-NBL1	100532736	32	CGI	TRUE	FALSE	FALSE
cg04780572	chr1	111097901	111097902	KCNA10	3744	-36103	CGI-N-Shore	FALSE	FALSE	TRUE
cg04835163	chr1	74663899	74663900	FPGT-TNNI3K	100526835	2	CGI	TRUE	FALSE	FALSE
cg04850059	chr1	225883161	225883162	ENAH	55740	-42315	Non-CGI	FALSE	FALSE	TRUE
cg04865841	chr1	3566992	3566993	WRAP73	49856	-320	CGI-S-Shore	TRUE	FALSE	FALSE
cg04867733	chr1	77747987	77747988	AK5	26289	324	CGI	TRUE	FALSE	FALSE
cg04868078	chr1	197898229	197898230	LHX9	56956	16593	Non-CGI	FALSE	TRUE	FALSE
cg04869838	chr1	147801437	147801438	PPIAL4B	653505	153980	CGI	TRUE	TRUE	FALSE
cg04886391	chr1	23345709	23345710	KDM1A	23028	-230	CGI-N-Shore	TRUE	FALSE	FALSE
cg04892409	chr1	170501224	170501225	GORAB	92344	-37	CGI	TRUE	FALSE	FALSE
cg04897742	chr1	16085148	16085149	FBLIM1	54751	1993	CGI	TRUE	TRUE	FALSE
cg04916289	chr1	53704498	53704499	LOC100507564	100507564	215	CGI	TRUE	FALSE	FALSE
cg04935181	chr1	47133953	47133954	ATPAF1	64756	144	CGI	TRUE	TRUE	FALSE
cg04990202	chr1	153581750	153581751	S100A16	140576	3762	Non-CGI	TRUE	TRUE	FALSE
cg05120156	chr1	228290290	228290291	C1orf35	79169	730	CGI	FALSE	TRUE	FALSE
cg05340578	chr1	234634996	234634997	TARBP1	6894	-20146	Non-CGI	FALSE	FALSE	TRUE
cg05352303	chr1	220445520	220445521	RAB3GAP2	25782	321	CGI	FALSE	TRUE	FALSE
cg05388840	chr1	41981911	41981912	EDN2	1907	-31566	CGI-N-Shore	FALSE	TRUE	FALSE
cg05394663	chr1	228248785	228248786	ARF1	375	-21574	CGI	FALSE	TRUE	FALSE
cg05445839	chr1	27023088	27023089	ARID1A	8289	565	CGI	TRUE	FALSE	FALSE
cg05523370	chr1	150293897	150293898	PRPF3	9129	-29	CGI	TRUE	FALSE	FALSE
cg05594095	chr1	6476916	6476917	HES2	54626	7812	CGI-N-Shelf	FALSE	TRUE	FALSE
cg05630111	chr1	150948030	150948031	CERS2	29956	-550	CGI-S-Shore	TRUE	FALSE	FALSE
cg05637536	chr1	154475068	154475069	TDRD10	126668	372	CGI	TRUE	FALSE	FALSE
cg05639522	chr1	247681581	247681582	GCSAML	148823	11186	CGI	TRUE	TRUE	FALSE
cg05642789	chr1	1564482	1564483	MMP23B	8510	-3076	CGI-S-Shore	TRUE	TRUE	FALSE
cg05650453	chr1	7432644	7432645	VAMP3	9341	-398683	Non-CGI	FALSE	TRUE	FALSE
cg05656688	chr1	25254088	25254089	RUNX3	864	37522	CGI-N-Shore	FALSE	TRUE	FALSE
cg05697866	chr1	2437200	2437201	PANK4	55229	20833	CGI	FALSE	FALSE	TRUE
cg05721645	chr1	246729578	246729579	TFB2M	64216	-12	CGI	TRUE	FALSE	FALSE
cg05725080	chr1	244615276	244615277	ADSS	159	158	CGI	TRUE	FALSE	FALSE
cg05797770	chr1	16470667	16470668	EPHA2	1969	11913	CGI-N-Shore	FALSE	TRUE	FALSE
cg05802073	chr1	53581841	53581842	SLC1A7	6512	26446	Non-CGI	TRUE	TRUE	FALSE
cg05802452	chr1	228194476	228194477	WNT3A	89780	-245	CGI	TRUE	FALSE	FALSE
cg05921170	chr1	153346191	153346192	S100A12	6283	1882	Non-CGI	FALSE	TRUE	FALSE
cg05923595	chr1	33547713	33547714	ADC	113451	998	CGI	TRUE	TRUE	FALSE
cg05930400	chr1	36273677	36273678	2004-08-01	192670	-149	CGI	TRUE	FALSE	FALSE
cg05947402	chr1	110052352	110052353	AMIGO1	57463	-15	CGI	TRUE	FALSE	FALSE
cg05955287	chr1	54303980	54303981	TMEM48	55706	243	CGI	TRUE	FALSE	FALSE
cg05962079	chr1	2428333	2428334	PLCH2	9651	20578	CGI	TRUE	TRUE	FALSE
cg05968270	chr1	65533502	65533503	MIR101-1	406893	-9310	CGI	FALSE	FALSE	TRUE
cg06034096	chr1	74663680	74663681	LRRIQ3	127255	189	CGI	TRUE	FALSE	FALSE
cg06092702	chr1	163392909	163392910	NUF2	83540	101185	CGI	FALSE	FALSE	TRUE
cg06098761	chr1	210405808	210405809	SERTAD4	56256	-385	CGI	TRUE	TRUE	FALSE
cg06173481	chr1	153658650	153658651	NPR1	4881	7485	CGI-N-Shelf	FALSE	TRUE	FALSE
cg06178322	chr1	16010345	16010346	PLEKHM2	23207	-480	CGI-N-Shore	TRUE	FALSE	FALSE
cg06194479	chr1	118472240	118472241	GDAP2	54834	60	CGI	TRUE	FALSE	FALSE
cg06201907	chr1	113249974	113249975	RHOC	389	49	CGI	TRUE	FALSE	FALSE
cg06205922	chr1	1473141	1473142	TMEM240	339453	2597	CGI-S-Shore	FALSE	TRUE	FALSE
cg06216400	chr1	155161161	155161162	MUC1	4582	1543	CGI	TRUE	TRUE	FALSE
cg06217312	chr1	150552348	150552349	MCL1	4170	-133	CGI	TRUE	FALSE	FALSE
cg06320401	chr1	48176755	48176756	FOXD2	2306	275065	CGI	FALSE	FALSE	TRUE
cg06346857	chr1	21877579	21877580	ALPL	249	41720	Non-CGI	TRUE	TRUE	FALSE
cg06346974	chr1	65775059	65775060	DNAJC6	9829	54910	CGI	TRUE	TRUE	FALSE
cg06350097	chr1	161474970	161474971	FCGR2A	2212	-233	Non-CGI	TRUE	FALSE	FALSE
cg06359703	chr1	41847297	41847298	EDN2	1907	103045	CGI-N-Shore	FALSE	FALSE	TRUE
cg06368558	chr1	26735884	26735885	LIN28A	79727	-1383	CGI-S-Shore	TRUE	FALSE	FALSE
cg06372391	chr1	62785079	62785080	KANK4	163782	2	CGI	TRUE	FALSE	FALSE
cg06443533	chr1	1182424	1182425	FAM132A	388581	-321	CGI	TRUE	FALSE	FALSE
cg06444282	chr1	20669975	20669976	VWA5B1	127731	52562	CGI	FALSE	TRUE	FALSE
cg06456464	chr1	9352752	9352753	SPSB1	80176	-187	CGI	TRUE	FALSE	FALSE
cg06524630	chr1	205898442	205898443	SLC26A9	115019	14144	Non-CGI	TRUE	TRUE	FALSE
cg06525051	chr1	202927473	202927474	ADIPOR1	51094	225	CGI	TRUE	TRUE	FALSE
cg06619807	chr1	8011102	8011103	TNFRSF9	3604	-7876	CGI-N-Shore	FALSE	FALSE	TRUE
cg06641388	chr1	12655240	12655241	DHRS3	9249	22578	CGI-N-Shore	FALSE	TRUE	FALSE
cg06645033	chr1	50890678	50890679	DMRTA2	63950	-1558	CGI	TRUE	FALSE	FALSE
cg06649280	chr1	24438781	24438782	MYOM3	127294	-115	CGI	TRUE	FALSE	FALSE
cg06650246	chr1	206897270	206897271	MAPKAPK2	9261	38904	Non-CGI	FALSE	TRUE	FALSE
cg06750897	chr1	164545553	164545554	PBX1	5087	16955	CGI	FALSE	TRUE	FALSE
cg06772309	chr1	17571896	17571897	PADI3	51702	-3695	CGI-S-Shelf	FALSE	TRUE	FALSE
cg06804846	chr1	6535492	6535493	TNFRSF25	8718	-9236	CGI-S-Shore	FALSE	TRUE	FALSE
cg06866616	chr1	2455264	2455265	PANK4	55229	2769	CGI	FALSE	TRUE	FALSE
cg06866827	chr1	2948464	2948465	ACTRT2	140625	10417	CGI	FALSE	FALSE	TRUE
cg06899053	chr1	33896703	33896704	PHC2	1912	-87	CGI	TRUE	FALSE	FALSE
cg06909773	chr1	22151328	22151329	LDLRAD2	401944	12569	CGI-S-Shore	FALSE	TRUE	FALSE
cg06925975	chr1	23946267	23946268	MDS2	259283	38281	CGI	FALSE	TRUE	FALSE
cg06935598	chr1	211433485	211433486	RCOR3	55758	776	CGI	TRUE	TRUE	FALSE
cg06946154	chr1	246887942	246887943	SCCPDH	51097	563	CGI	FALSE	TRUE	FALSE
cg06966242	chr1	4832432	4832433	AJAP1	55966	117326	CGI	FALSE	TRUE	FALSE
cg06978943	chr1	984992	984993	RNF223	401934	24693	CGI	FALSE	TRUE	FALSE
cg06988368	chr1	147142773	147142774	ACP6	51205	-138	CGI	TRUE	FALSE	FALSE
cg06995880	chr1	61516444	61516445	NFIA	4774	-26500	CGI	FALSE	FALSE	TRUE
cg07008784	chr1	205498551	205498552	CDK18	5129	24866	CGI	FALSE	TRUE	FALSE
cg07029226	chr1	2104223	2104224	C1orf86	199990	34947	CGI-S-Shore	FALSE	TRUE	FALSE
cg07029873	chr1	217311014	217311015	ESRRG	2104	81	CGI	TRUE	FALSE	FALSE
cg07049833	chr1	222791172	222791173	MIA3	375056	-270	CGI	TRUE	FALSE	FALSE
cg07091412	chr1	20810651	20810652	CAMK2N1	55450	2075	CGI	FALSE	TRUE	FALSE
cg07104388	chr1	110091050	110091051	GNAI3	2773	-134	CGI	TRUE	FALSE	FALSE
cg07105891	chr1	21031312	21031313	KIF17	57576	13003	CGI	FALSE	TRUE	FALSE
cg07105947	chr1	35586588	35586589	ZMYM1	79830	41615	CGI	FALSE	FALSE	TRUE
cg07114770	chr1	144932136	144932137	LOC653513	653513	107854	CGI	TRUE	TRUE	FALSE
cg07135408	chr1	236908002	236908003	MTR	4548	-50577	Non-CGI	FALSE	TRUE	FALSE
cg07149609	chr1	170630734	170630735	PRRX1	5396	-2577	CGI	FALSE	FALSE	TRUE
cg07155336	chr1	107683775	107683776	NTNG1	22854	1145	CGI	FALSE	TRUE	FALSE
cg07209987	chr1	10221203	10221204	KIF1B	23095	-49559	Non-CGI	FALSE	TRUE	FALSE
cg07309943	chr1	236445064	236445065	ERO1LB	56605	273	CGI	TRUE	FALSE	FALSE
cg07367434	chr1	40781135	40781136	COL9A2	1298	1923	CGI	FALSE	TRUE	FALSE
cg07379140	chr1	95538546	95538547	ALG14	199857	-38	CGI	TRUE	FALSE	FALSE
cg07382920	chr1	3567646	3567647	WRAP73	49856	-974	CGI	TRUE	FALSE	FALSE
cg07536847	chr1	18957232	18957233	PAX7	5081	-266	CGI	TRUE	FALSE	FALSE
cg07576219	chr1	55012408	55012409	ACOT11	26027	4477	CGI-S-Shelf	TRUE	TRUE	FALSE
cg07599786	chr1	201618654	201618655	NAV1	89796	1203	CGI	FALSE	TRUE	FALSE
cg07605211	chr1	223538359	223538360	SUSD4	55061	-814	CGI	TRUE	FALSE	FALSE
cg07719884	chr1	43824467	43824468	CDC20	991	-157	CGI	TRUE	FALSE	FALSE
cg07719898	chr1	200274728	200274729	LINC00862	554279	68190	CGI-S-Shelf	FALSE	FALSE	TRUE
cg07723921	chr1	112531332	112531333	KCND3	3752	443	CGI-N-Shore	TRUE	TRUE	FALSE
cg07789132	chr1	164290751	164290752	PBX1	5087	-237844	CGI	FALSE	FALSE	TRUE
cg07792636	chr1	27878409	27878410	AHDC1	27245	51950	CGI	TRUE	TRUE	FALSE
cg07793638	chr1	6675684	6675685	PHF13	148479	1927	CGI	FALSE	TRUE	FALSE
cg07799314	chr1	159899530	159899531	TAGLN2	8407	-4245	CGI	TRUE	TRUE	FALSE
cg07802625	chr1	32281665	32281666	SPOCD1	90853	-84	Non-CGI	TRUE	FALSE	FALSE
cg07821364	chr1	2411137	2411138	PLCH2	9651	3382	CGI	TRUE	TRUE	FALSE
cg07836663	chr1	2066167	2066168	C1orf86	199990	73003	CGI	FALSE	TRUE	FALSE
cg07906262	chr1	41303570	41303571	CITED4	163732	24446	CGI	FALSE	TRUE	FALSE
cg07952381	chr1	23040723	23040724	EPHB2	2048	3391	CGI-S-Shore	FALSE	TRUE	FALSE
cg07953201	chr1	245851802	245851803	KIF26B	55083	533514	CGI	FALSE	TRUE	FALSE
cg07959491	chr1	204347150	204347151	LINC00628	127841	-8302	CGI	FALSE	FALSE	TRUE
cg07970040	chr1	9789165	9789166	C1orf200	644997	-74520	CGI	FALSE	TRUE	FALSE
cg07972116	chr1	2822822	2822823	ACTRT2	140625	-115222	CGI	FALSE	FALSE	TRUE
cg08008854	chr1	146643751	146643752	PRKAB2	5565	376	CGI	FALSE	TRUE	FALSE
cg08036524	chr1	3426422	3426423	MIR551A	693135	50930	CGI-S-Shore	FALSE	TRUE	FALSE
cg08109624	chr1	242220925	242220926	MAP1LC3C	440738	-58539	CGI	FALSE	FALSE	TRUE
cg08121453	chr1	248855364	248855365	OR14I1	401994	-9758	CGI	FALSE	FALSE	TRUE
cg08121652	chr1	48381824	48381825	TRABD2B	388630	80736	Non-CGI	FALSE	TRUE	FALSE
cg08146977	chr1	31628259	31628260	NKAIN1	79570	84473	CGI	FALSE	FALSE	TRUE
cg08231697	chr1	157165335	157165336	ETV3	2117	-56951	CGI	FALSE	FALSE	TRUE
cg08231710	chr1	1566687	1566688	MMP23B	8510	-871	CGI	TRUE	FALSE	FALSE
cg08249619	chr1	205498018	205498019	CDK18	5129	24333	CGI-N-Shore	FALSE	TRUE	FALSE
cg08264835	chr1	20716191	20716192	LOC339505	339505	39094	Non-CGI	FALSE	TRUE	FALSE
cg08272731	chr1	75602167	75602168	LHX8	431707	8047	CGI	FALSE	TRUE	FALSE
cg08273935	chr1	2518354	2518355	FAM213B	127281	454	CGI	TRUE	TRUE	FALSE
cg08274380	chr1	109419600	109419601	GPSM2	29899	-1	CGI	TRUE	TRUE	FALSE
cg08355353	chr1	113217657	113217658	MOV10	4343	608	CGI	TRUE	TRUE	FALSE
cg08479603	chr1	19638460	19638461	AKR7A2	8574	178	CGI	TRUE	FALSE	FALSE
cg08529295	chr1	245132782	245132783	EFCAB2	84288	-387	CGI-N-Shore	TRUE	FALSE	FALSE
cg08643472	chr1	16302298	16302299	ZBTB17	7709	327	CGI	FALSE	TRUE	FALSE
cg08655686	chr1	38100087	38100088	RSPO1	284654	506	CGI	FALSE	TRUE	FALSE
cg08706732	chr1	29448625	29448626	TMEM200B	399474	1794	CGI	TRUE	TRUE	FALSE
cg08709360	chr1	1003376	1003377	RNF223	401934	6309	CGI	FALSE	FALSE	TRUE
cg08709672	chr1	206224334	206224335	AVPR1B	553	50	CGI-S-Shore	TRUE	FALSE	FALSE
cg08719467	chr1	146714230	146714231	CHD1L	9557	-59	CGI	TRUE	FALSE	FALSE
cg08719577	chr1	3528355	3528356	MEGF6	1953	-295	CGI	TRUE	FALSE	FALSE
cg08732750	chr1	87598351	87598352	LOC339524	339524	139660	CGI	TRUE	TRUE	FALSE
cg08845123	chr1	62784332	62784333	KANK4	163782	749	CGI	FALSE	TRUE	FALSE
cg08845439	chr1	151512945	151512946	TUFT1	7286	163	CGI	FALSE	TRUE	FALSE
cg08856919	chr1	8484157	8484158	SLC45A1	50651	99766	CGI	TRUE	TRUE	FALSE
cg08867825	chr1	102312608	102312609	DNAJA1P5	94236	-24957	Non-CGI	TRUE	TRUE	FALSE
cg08876274	chr1	3028230	3028231	MIR4251	100422968	-16307	CGI	FALSE	TRUE	FALSE
cg08881871	chr1	228503693	228503694	TRIM11	81559	90822	CGI	FALSE	TRUE	FALSE
cg08887707	chr1	3613723	3613724	TP73	7161	44593	CGI-N-Shore	TRUE	TRUE	FALSE
cg08900371	chr1	210407556	210407557	SERTAD4-AS1	574036	-89	CGI	TRUE	TRUE	FALSE
cg08915090	chr1	202777584	202777585	KDM5B	10765	-34	CGI	TRUE	FALSE	FALSE
cg08926642	chr1	7887455	7887456	PER3	8863	43074	CGI	FALSE	TRUE	FALSE
cg08926982	chr1	10270439	10270440	KIF1B	23095	-323	CGI	TRUE	FALSE	FALSE
cg08928753	chr1	43770707	43770708	TIE1	7075	4140	CGI	TRUE	TRUE	FALSE
cg08937380	chr1	55446131	55446132	TMEM61	199964	-332	CGI	TRUE	FALSE	FALSE
cg09030189	chr1	202163291	202163292	LGR6	59352	172	CGI	TRUE	FALSE	FALSE
cg09062638	chr1	23003490	23003491	C1QB	713	23807	CGI-N-Shore	FALSE	FALSE	TRUE
cg09075558	chr1	228246780	228246781	ARF1	375	-23579	CGI	FALSE	TRUE	FALSE
cg09106903	chr1	217309568	217309569	ESRRG	2104	1527	CGI	FALSE	TRUE	FALSE
cg09107594	chr1	247877081	247877082	OR6F1	343169	-1023	Non-CGI	TRUE	FALSE	FALSE
cg09117878	chr1	109289049	109289050	STXBP3	6814	-234	CGI-N-Shore	TRUE	FALSE	FALSE
cg09133006	chr1	206680888	206680889	RASSF5	83593	8	CGI	TRUE	FALSE	FALSE
cg09144608	chr1	2098929	2098930	C1orf86	199990	40241	CGI-S-Shore	TRUE	TRUE	FALSE
cg09166705	chr1	151170883	151170884	PIP5K1A	8394	-136	CGI	TRUE	FALSE	FALSE
cg09182724	chr1	193075640	193075641	GLRX2	51022	-395	CGI-S-Shore	TRUE	FALSE	FALSE
cg09223698	chr1	218497686	218497687	TGFB2	7042	-20988	CGI-N-Shore	FALSE	TRUE	FALSE
cg09232430	chr1	21616825	21616826	LOC100506801	100506801	-2956	CGI	TRUE	TRUE	FALSE
cg09255966	chr1	2334136	2334137	PEX10	5192	9872	CGI	FALSE	TRUE	FALSE
cg09265619	chr1	6659205	6659206	KLHL21	9903	3722	CGI	FALSE	TRUE	FALSE
cg09276842	chr1	1155026	1155027	TNFRSF4	7293	-5477	CGI	TRUE	TRUE	FALSE
cg09321097	chr1	226187056	226187057	SDE2	163859	8	CGI	TRUE	FALSE	FALSE
cg09364122	chr1	942198	942199	HES4	57801	-6645	CGI-N-Shore	FALSE	FALSE	TRUE
cg09411356	chr1	228395756	228395757	OBSCN	84033	-103	CGI-N-Shelf	TRUE	TRUE	FALSE
cg09414948	chr1	16490791	16490792	EPHA2	1969	-8208	CGI-S-Shore	FALSE	FALSE	TRUE
cg09470268	chr1	18617697	18617698	IGSF21	84966	183456	CGI	FALSE	TRUE	FALSE
cg09502069	chr1	224372558	224372559	DEGS1	8560	1647	CGI-S-Shore	FALSE	TRUE	FALSE
cg09586322	chr1	32706085	32706086	MTMR9LP	339483	1224	CGI	TRUE	TRUE	FALSE
cg09637004	chr1	41483537	41483538	SLFNL1-AS1	100507178	3274	CGI	TRUE	TRUE	FALSE
cg09662920	chr1	78511433	78511434	GIPC2	54810	-154	CGI	TRUE	FALSE	FALSE
cg09755039	chr1	161129745	161129746	USP21	27005	490	CGI	FALSE	TRUE	FALSE
cg09763175	chr1	57110722	57110723	PRKAA2	5563	-266	CGI	TRUE	FALSE	FALSE
cg09769134	chr1	67217769	67217770	TCTEX1D1	200132	-369	CGI-N-Shore	TRUE	FALSE	FALSE
cg09796501	chr1	26233435	26233436	STMN1	3925	-66	CGI	TRUE	FALSE	FALSE
cg09807229	chr1	179051699	179051700	TOR3A	64222	586	CGI	FALSE	TRUE	FALSE
cg09824328	chr1	43425412	43425413	SLC2A1	6513	-564	CGI-S-Shore	TRUE	TRUE	FALSE
cg09867184	chr1	153939684	153939685	SLC39A1	27173	502	CGI	TRUE	TRUE	FALSE
cg09871695	chr1	227506513	227506514	CDC42BPA	8476	-686	CGI	TRUE	FALSE	FALSE
cg09897416	chr1	149859252	149859253	HIST2H2AB	317772	212	CGI	TRUE	FALSE	FALSE
cg10014674	chr1	33430585	33430586	RNF19B	127544	-298	CGI-S-Shore	TRUE	FALSE	FALSE
cg10038185	chr1	68517273	68517274	DIRAS3	9077	-791	CGI	TRUE	TRUE	FALSE
cg10096873	chr1	92546470	92546471	BTBD8	284697	607	CGI	FALSE	TRUE	FALSE
cg10103446	chr1	77685150	77685151	PIGK	10026	-17	CGI	TRUE	FALSE	FALSE
cg10108612	chr1	19203999	19204000	MIR4695	100616120	5773	CGI	FALSE	TRUE	FALSE
cg10121294	chr1	26516508	26516509	CATSPER4	378807	-609	Non-CGI	TRUE	FALSE	FALSE
cg10127162	chr1	197170891	197170892	CRB1	23418	298	CGI	TRUE	TRUE	FALSE
cg10196558	chr1	155043921	155043922	LOC100505666	100505666	-7453	CGI	FALSE	TRUE	FALSE
cg10207181	chr1	147801090	147801091	PPIAL4B	653505	154327	CGI-N-Shore	TRUE	TRUE	FALSE
cg10208113	chr1	1179747	1179748	FAM132A	388581	2353	CGI	FALSE	TRUE	FALSE
cg10210571	chr1	231664364	231664365	TSNAX-DISC1	100303453	-33	CGI	TRUE	FALSE	FALSE
cg10211861	chr1	59762176	59762177	FGGY	55277	-447	CGI	TRUE	FALSE	FALSE
cg10313417	chr1	40420809	40420810	MFSD2A	84879	24	CGI	TRUE	FALSE	FALSE
cg10314909	chr1	2524890	2524891	FAM213B	127281	6990	CGI-S-Shore	FALSE	TRUE	FALSE
cg10333268	chr1	231004326	231004327	C1orf198	84886	1007	CGI	TRUE	TRUE	FALSE
cg10387458	chr1	93645817	93645818	TMED5	50999	427	CGI	TRUE	FALSE	FALSE
cg10433463	chr1	1889099	1889100	TMEM52	339456	-38358	CGI	FALSE	TRUE	FALSE
cg10440578	chr1	115397857	115397858	SYCP1	6847	401	CGI	FALSE	TRUE	FALSE
cg10530644	chr1	212965113	212965114	NSL1	25936	24	CGI	TRUE	FALSE	FALSE
cg10533103	chr1	212688961	212688962	ATF3	467	-49713	CGI	FALSE	FALSE	TRUE
cg10578696	chr1	65532742	65532743	MIR101-1	406893	-8550	CGI	FALSE	FALSE	TRUE
cg10620434	chr1	5586357	5586358	MIR4417	100616489	-37772	CGI	FALSE	FALSE	TRUE
cg10626236	chr1	1631100	1631101	MMP23A	8511	-276	CGI	TRUE	TRUE	FALSE
cg10629420	chr1	3377918	3377919	ARHGEF16	27237	6770	CGI	FALSE	TRUE	FALSE
cg10636760	chr1	2904595	2904596	ACTRT2	140625	-33449	Non-CGI	FALSE	FALSE	TRUE
cg10709494	chr1	115323130	115323131	SIKE1	80143	176	CGI	TRUE	FALSE	FALSE
cg10785099	chr1	200969816	200969817	KIF21B	23046	23010	CGI	FALSE	TRUE	FALSE
cg10827434	chr1	84944976	84944977	RPF1	80135	55	CGI	TRUE	FALSE	FALSE
cg10839663	chr1	113261613	113261614	FAM19A3	284467	-1574	CGI	TRUE	FALSE	FALSE
cg10877147	chr1	9648619	9648620	TMEM201	199953	-311	CGI	TRUE	FALSE	FALSE
cg10888031	chr1	2938799	2938800	ACTRT2	140625	752	CGI	TRUE	FALSE	FALSE
cg10950111	chr1	228337379	228337380	GJC2	57165	-34	Non-CGI	TRUE	FALSE	FALSE
cg10951786	chr1	104068603	104068604	RNPC3	55599	24	CGI	TRUE	FALSE	FALSE
cg10963061	chr1	158147729	158147730	CD1D	912	-2006	CGI	FALSE	FALSE	TRUE
cg10983617	chr1	978664	978665	AGRN	375790	23160	CGI-S-Shore	FALSE	TRUE	FALSE
cg10992267	chr1	82268588	82268589	LPHN2	23266	496742	CGI	FALSE	TRUE	FALSE
cg11166453	chr1	247681781	247681782	GCSAML	148823	11386	CGI	TRUE	TRUE	FALSE
cg11176493	chr1	228248237	228248238	ARF1	375	-22122	CGI-S-Shore	FALSE	TRUE	FALSE
cg11185975	chr1	155715418	155715419	MSTO2P	100129405	-189	CGI	TRUE	TRUE	FALSE
cg11200797	chr1	1016470	1016471	RNF223	401934	-6782	CGI-S-Shore	FALSE	FALSE	TRUE
cg11222217	chr1	10732519	10732520	CASZ1	54897	124186	CGI-N-Shore	FALSE	TRUE	FALSE
cg11235152	chr1	67600687	67600688	C1orf141	400757	-33	CGI	TRUE	FALSE	FALSE
cg11235921	chr1	917819	917820	C1orf170	84808	-345	CGI	TRUE	FALSE	FALSE
cg11237215	chr1	244806055	244806056	DESI2	51029	-10295	CGI-N-Shore	FALSE	FALSE	TRUE
cg11378242	chr1	244999800	244999801	COX20	116228	1160	CGI-S-Shore	FALSE	TRUE	FALSE
cg11390151	chr1	2387810	2387811	PLCH2	9651	-19942	CGI	FALSE	FALSE	TRUE
cg11401257	chr1	226926945	226926946	ITPKB	3707	-68	CGI	TRUE	FALSE	FALSE
cg11414913	chr1	2799662	2799663	TTC34	100287898	-93431	CGI	FALSE	FALSE	TRUE
cg11415975	chr1	24194453	24194454	FUCA1	2517	404	CGI	TRUE	FALSE	FALSE
cg11428724	chr1	18957632	18957633	PAX7	5081	131	CGI	TRUE	FALSE	FALSE
cg11505113	chr1	213125130	213125131	VASH2	79805	1242	CGI-S-Shore	TRUE	TRUE	FALSE
cg11521998	chr1	1536054	1536055	C1orf233	643988	-577	CGI	TRUE	FALSE	FALSE
cg11523538	chr1	244013970	244013971	AKT3	10000	-7083	CGI	FALSE	FALSE	TRUE
cg11524235	chr1	33351587	33351588	HPCA	3208	-509	CGI-N-Shore	TRUE	FALSE	FALSE
cg11528995	chr1	117210575	117210576	IGSF3	3321	-260	CGI	TRUE	FALSE	FALSE
cg11570511	chr1	16543021	16543022	ARHGEF19	128272	-3916	CGI	FALSE	FALSE	TRUE
cg11574055	chr1	117077116	117077117	CD58	965	36597	CGI	FALSE	TRUE	FALSE
cg11574975	chr1	112058304	112058305	RAP1A	5906	-26749	CGI	FALSE	TRUE	FALSE
cg11582018	chr1	87598069	87598070	LOC339524	339524	139378	CGI	TRUE	TRUE	FALSE
cg11589139	chr1	229567139	229567140	ACTA1	58	2702	CGI-N-Shore	FALSE	TRUE	FALSE
cg11661940	chr1	201776894	201776895	MIR1231	100302158	-843	Non-CGI	TRUE	TRUE	FALSE
cg11666087	chr1	49242513	49242514	BEND5	79656	32	CGI	TRUE	TRUE	FALSE
cg11688696	chr1	155052192	155052193	LOC100505666	100505666	-15724	CGI	FALSE	TRUE	FALSE
cg11689813	chr1	229570052	229570053	ACTA1	58	-208	CGI	TRUE	FALSE	FALSE
cg11692307	chr1	2426035	2426036	PLCH2	9651	18280	CGI-S-Shore	FALSE	TRUE	FALSE
cg11706999	chr1	249105862	249105863	SH3BP5L	80851	14290	CGI-N-Shore	FALSE	TRUE	FALSE
cg11715828	chr1	44884150	44884151	RNF220	55182	13189	CGI-S-Shore	FALSE	TRUE	FALSE
cg11717597	chr1	156046546	156046547	MEX3A	92312	5241	CGI	FALSE	TRUE	FALSE
cg11721177	chr1	22919873	22919874	EPHA8	2046	29868	CGI	FALSE	TRUE	FALSE
cg11723801	chr1	156646485	156646486	NES	10763	702	CGI	TRUE	FALSE	FALSE
cg11732134	chr1	10732912	10732913	CASZ1	54897	123793	CGI	FALSE	TRUE	FALSE
cg11746651	chr1	3664612	3664613	TP73-AS1	57212	-674	CGI-S-Shore	TRUE	FALSE	FALSE
cg11817309	chr1	249152443	249152444	ZNF692	55657	870	CGI-N-Shore	TRUE	TRUE	FALSE
cg11819639	chr1	202311208	202311209	UBE2T	29089	-113	CGI	TRUE	FALSE	FALSE
cg11821626	chr1	150947403	150947404	CERS2	29956	74	CGI	TRUE	FALSE	FALSE
cg11831004	chr1	52834260	52834261	CC2D1B	200014	-2382	CGI	FALSE	FALSE	TRUE
cg11834658	chr1	21611224	21611225	LOC100506801	100506801	-8557	Non-CGI	FALSE	TRUE	FALSE
cg11857025	chr1	109633344	109633345	TMEM167B	56900	-57	CGI	TRUE	FALSE	FALSE
cg11913218	chr1	10754156	10754157	CASZ1	54897	102549	CGI	FALSE	TRUE	FALSE
cg11951427	chr1	35351903	35351904	DLGAP3	58512	19079	CGI-S-Shore	FALSE	TRUE	FALSE
cg12070724	chr1	205238533	205238534	TMCC2	9911	41494	CGI	TRUE	TRUE	FALSE
cg12081443	chr1	4037236	4037237	LOC728716	728716	36563	CGI	FALSE	FALSE	TRUE
cg12097325	chr1	1076431	1076432	LOC254099	254099	4033	CGI	FALSE	TRUE	FALSE
cg12140144	chr1	2984275	2984276	FLJ42875	440556	12	CGI	TRUE	FALSE	FALSE
cg12141218	chr1	209799248	209799249	MIR4260	100422894	-2392	Non-CGI	FALSE	TRUE	FALSE
cg12141340	chr1	19890415	19890416	C1orf151-NBL1	100532736	-33054	Non-CGI	FALSE	FALSE	TRUE
cg12167830	chr1	57111108	57111109	PRKAA2	5563	117	CGI	TRUE	FALSE	FALSE
cg12219387	chr1	1154157	1154158	TNFRSF4	7293	-4608	CGI	TRUE	TRUE	FALSE
cg12222949	chr1	184005360	184005361	GLT25D2	23127	1516	CGI-N-Shore	FALSE	TRUE	FALSE
cg12297374	chr1	19038550	19038551	PAX7	5081	81049	Non-CGI	FALSE	TRUE	FALSE
cg12400807	chr1	23752503	23752504	TCEA3	6920	-1241	CGI-S-Shore	TRUE	FALSE	FALSE
cg12404281	chr1	165414806	165414807	RXRG	6258	-213	CGI-S-Shore	TRUE	FALSE	FALSE
cg12406391	chr1	6520194	6520195	TNFRSF25	8718	6059	CGI	FALSE	TRUE	FALSE
cg12406825	chr1	117452407	117452408	PTGFRN	5738	-280	CGI	TRUE	FALSE	FALSE
cg12417362	chr1	201617355	201617356	NAV1	89796	-93	CGI	TRUE	FALSE	FALSE
cg12467595	chr1	19920571	19920572	C1orf151-NBL1	100532736	-2898	CGI-N-Shelf	FALSE	FALSE	TRUE
cg12469361	chr1	982189	982190	AGRN	375790	26685	CGI	FALSE	TRUE	FALSE
cg12473697	chr1	2205770	2205771	SKI	6497	45635	CGI-S-Shore	FALSE	TRUE	FALSE
cg12485685	chr1	63384921	63384922	ATG4C	84938	135143	Non-CGI	FALSE	FALSE	TRUE
cg12581547	chr1	62657689	62657690	L1TD1	54596	-2783	CGI-N-Shelf	FALSE	FALSE	TRUE
cg12601945	chr1	18958924	18958925	PAX7	5081	1423	CGI	FALSE	TRUE	FALSE
cg12610519	chr1	16494002	16494003	EPHA2	1969	-11419	CGI-N-Shore	FALSE	FALSE	TRUE
cg12629448	chr1	152733025	152733026	KPRP	448834	2518	CGI	TRUE	TRUE	FALSE
cg12634306	chr1	40098811	40098812	HEYL	26508	6535	CGI	TRUE	TRUE	FALSE
cg12651044	chr1	150241550	150241551	APH1A	51107	57	CGI	TRUE	FALSE	FALSE
cg12663321	chr1	46972470	46972471	DMBX1	127343	-196	Non-CGI	TRUE	FALSE	FALSE
cg12666727	chr1	42128487	42128488	EDN2	1907	-178142	CGI	FALSE	TRUE	FALSE
cg12690066	chr1	153662408	153662409	NPR1	4881	11243	CGI	FALSE	TRUE	FALSE
cg12730853	chr1	64935328	64935329	CACHD1	57685	-1146	CGI-N-Shore	TRUE	FALSE	FALSE
cg12741345	chr1	155052737	155052738	LOC100505666	100505666	-16269	CGI	FALSE	TRUE	FALSE
cg12742432	chr1	27677860	27677861	SYTL1	84958	9376	CGI	FALSE	TRUE	FALSE
cg12751404	chr1	11866034	11866035	MTHFR	4524	124	CGI	TRUE	FALSE	FALSE
cg12753558	chr1	247464072	247464073	ZNF496	84838	30971	CGI	FALSE	TRUE	FALSE
cg12754571	chr1	247694271	247694272	GCSAML-AS1	148824	-164	CGI	TRUE	TRUE	FALSE
cg12758973	chr1	247694275	247694276	GCSAML-AS1	148824	-168	CGI	TRUE	TRUE	FALSE
cg12768681	chr1	20879547	20879548	FAM43B	163933	614	CGI	TRUE	FALSE	FALSE
cg12902497	chr1	8938815	8938816	ENO1-AS1	100505975	-77	CGI	TRUE	FALSE	FALSE
cg12905085	chr1	32054510	32054511	TINAGL1	64129	12423	CGI	FALSE	FALSE	TRUE
cg13056990	chr1	4736099	4736100	AJAP1	55966	20993	CGI	FALSE	TRUE	FALSE
cg13060157	chr1	113286610	113286611	FAM19A3	284467	23420	CGI	FALSE	FALSE	TRUE
cg13064658	chr1	212003989	212003990	LPGAT1	9926	123	CGI	TRUE	FALSE	FALSE
cg13067553	chr1	147782452	147782453	PPIAL4B	653505	172965	CGI	TRUE	TRUE	FALSE
cg13077490	chr1	10459573	10459574	PGD	5226	487	CGI	FALSE	TRUE	FALSE
cg13112404	chr1	182921688	182921689	SHCBP1L	81626	863	CGI	FALSE	TRUE	FALSE
cg13115616	chr1	17338059	17338060	ATP13A2	23400	362	CGI	FALSE	TRUE	FALSE
cg13182731	chr1	32208634	32208635	MIR4254	100423028	15700	CGI	FALSE	TRUE	FALSE
cg13184736	chr1	68299409	68299410	GNG12	55970	-253	CGI	TRUE	TRUE	FALSE
cg13207501	chr1	38470665	38470666	FHL3	2275	520	CGI	FALSE	TRUE	FALSE
cg13209113	chr1	3272732	3272733	ARHGEF16	27237	-98413	CGI-N-Shore	FALSE	TRUE	FALSE
cg13232357	chr1	151042823	151042824	GABPB2	126626	-255	CGI-N-Shore	TRUE	FALSE	FALSE
cg13234569	chr1	207818036	207818037	CR1L	1379	-420	CGI-N-Shore	TRUE	FALSE	FALSE
cg13362546	chr1	1102960	1102961	MIR200A	406983	-281	CGI	TRUE	FALSE	FALSE
cg13391456	chr1	24127242	24127243	GALE	2582	50	CGI	TRUE	FALSE	FALSE
cg13393580	chr1	1295077	1295078	MXRA8	54587	2078	CGI-N-Shore	TRUE	TRUE	FALSE
cg13426876	chr1	18691894	18691895	KLHDC7A	127707	-115528	CGI	FALSE	TRUE	FALSE
cg13437711	chr1	91317248	91317249	BARHL2	343472	-134453	CGI	TRUE	FALSE	FALSE
cg13455634	chr1	213823255	213823256	PROX1-AS1	100505832	316351	Non-CGI	FALSE	FALSE	TRUE
cg13460643	chr1	209848845	209848846	G0S2	50486	174	CGI	TRUE	FALSE	FALSE
cg13498757	chr1	152161927	152161928	RPTN	126638	-30222	CGI	FALSE	FALSE	TRUE
cg13556604	chr1	203274688	203274689	BTG2	7832	23	CGI	TRUE	FALSE	FALSE
cg13566436	chr1	25240865	25240866	RUNX3	864	50745	CGI-N-Shore	FALSE	TRUE	FALSE
cg13675568	chr1	44872075	44872076	RNF220	55182	1114	CGI	FALSE	TRUE	FALSE
cg13697378	chr1	68512845	68512846	DIRAS3	9077	3634	CGI	TRUE	TRUE	FALSE
cg13779567	chr1	233431268	233431269	PCNXL2	80003	189	CGI	TRUE	FALSE	FALSE
cg13786801	chr1	59042745	59042746	TACSTD2	4070	419	CGI	TRUE	FALSE	FALSE
cg13803688	chr1	110610452	110610453	ALX3	257	2868	CGI	FALSE	TRUE	FALSE
cg13850606	chr1	229543554	229543555	ACTA1	58	26287	CGI	FALSE	FALSE	TRUE
cg13851144	chr1	6239475	6239476	CHD5	26038	717	CGI	FALSE	TRUE	FALSE
cg13857689	chr1	26672613	26672614	AIM1L	55057	8006	Non-CGI	FALSE	TRUE	FALSE
cg13892954	chr1	57110867	57110868	PRKAA2	5563	-121	CGI	TRUE	FALSE	FALSE
cg13898430	chr1	25292274	25292275	RUNX3	864	-661	CGI-S-Shore	TRUE	FALSE	FALSE
cg13912858	chr1	109939840	109939841	SORT1	6272	721	CGI-N-Shore	FALSE	TRUE	FALSE
cg13914636	chr1	3623102	3623103	TP73-AS1	57212	40833	CGI	FALSE	TRUE	FALSE
cg13921652	chr1	144931966	144931967	LOC653513	653513	108024	CGI	TRUE	TRUE	FALSE
cg13931925	chr1	179545216	179545217	NPHS2	7827	-131	CGI	TRUE	FALSE	FALSE
cg13935009	chr1	205497713	205497714	CDK18	5129	24028	CGI-N-Shore	FALSE	TRUE	FALSE
cg13950210	chr1	45452319	45452320	EIF2B3	8891	40	CGI	TRUE	FALSE	FALSE
cg13993673	chr1	3447740	3447741	MIR551A	693135	29612	CGI	TRUE	TRUE	FALSE
cg14010405	chr1	89357911	89357912	GTF2B	2959	-609	CGI-S-Shore	TRUE	FALSE	FALSE
cg14015211	chr1	223315766	223315767	TLR5	7100	856	CGI-N-Shore	FALSE	TRUE	FALSE
cg14034757	chr1	209759145	209759146	CAMK1G	57172	2099	CGI	FALSE	TRUE	FALSE
cg14083421	chr1	7122639	7122640	CAMTA1	23261	277254	CGI	FALSE	TRUE	FALSE
cg14089881	chr1	6296630	6296631	ICMT	23463	-585	CGI-S-Shore	TRUE	FALSE	FALSE
cg14151682	chr1	20959926	20959927	PINK1	65018	-20	CGI	TRUE	FALSE	FALSE
cg14158583	chr1	161059458	161059459	PVRL4	81607	-72	Non-CGI	TRUE	FALSE	FALSE
cg14178748	chr1	153652247	153652248	NPR1	4881	1082	CGI	TRUE	FALSE	FALSE
cg14179389	chr1	92947961	92947962	GFI1	2672	4470	CGI	FALSE	TRUE	FALSE
cg14200569	chr1	3051925	3051926	MIR4251	100422968	7385	CGI	FALSE	TRUE	FALSE
cg14206273	chr1	10734693	10734694	CASZ1	54897	122012	CGI-S-Shore	FALSE	TRUE	FALSE
cg14212983	chr1	21985742	21985743	RAP1GAP	5909	10112	CGI-N-Shore	FALSE	TRUE	FALSE
cg14216290	chr1	109825773	109825774	PSRC1	84722	33	CGI	TRUE	FALSE	FALSE
cg14216876	chr1	2717193	2717194	TTC34	100287898	-10962	CGI	FALSE	FALSE	TRUE
cg14288281	chr1	1093457	1093458	MIR200B	406984	-9025	CGI	FALSE	FALSE	TRUE
cg14415733	chr1	39957204	39957205	BMP8A	353500	-112	CGI	TRUE	FALSE	FALSE
cg14422488	chr1	32538997	32538998	TMEM39B	55116	493	CGI	FALSE	TRUE	FALSE
cg14455487	chr1	42800860	42800861	FOXJ3	22887	686	CGI	TRUE	TRUE	FALSE
cg14477263	chr1	1168550	1168551	B3GALT6	126792	920	CGI	TRUE	FALSE	FALSE
cg14511923	chr1	7842369	7842370	PER3	8863	-2009	CGI-N-Shore	FALSE	FALSE	TRUE
cg14522793	chr1	38157567	38157568	C1orf109	54955	319	CGI	TRUE	TRUE	FALSE
cg14522944	chr1	1961743	1961744	GABRD	2563	10974	CGI	FALSE	TRUE	FALSE
cg14531560	chr1	16085371	16085372	FBLIM1	54751	2216	CGI	FALSE	TRUE	FALSE
cg14531564	chr1	1154853	1154854	TNFRSF4	7293	-5304	CGI-S-Shore	TRUE	TRUE	FALSE
cg14565265	chr1	90308951	90308952	LRRC8D	55144	22377	CGI	FALSE	TRUE	FALSE
cg14615266	chr1	35586649	35586650	ZMYM1	79830	41676	CGI	FALSE	FALSE	TRUE
cg14662119	chr1	153950267	153950268	JTB	10899	182	CGI	TRUE	FALSE	FALSE
cg14663264	chr1	91192798	91192799	BARHL2	343472	-10003	CGI-S-Shore	FALSE	FALSE	TRUE
cg14667685	chr1	39249604	39249605	MYCBP	26292	89444	CGI	FALSE	FALSE	TRUE
cg14709479	chr1	1108924	1108925	TTLL10	254173	-360	CGI	TRUE	TRUE	FALSE
cg14788660	chr1	155278430	155278431	FDPS	2224	-107	CGI-N-Shore	TRUE	FALSE	FALSE
cg14790208	chr1	145610755	145610756	POLR3C	10623	127	CGI	TRUE	FALSE	FALSE
cg14795268	chr1	1341852	1341853	MRPL20	55052	839	CGI	FALSE	TRUE	FALSE
cg14836248	chr1	7209987	7209988	CAMTA1	23261	364602	CGI	FALSE	TRUE	FALSE
cg14838433	chr1	55446303	55446304	TMEM61	199964	-160	CGI	TRUE	FALSE	FALSE
cg14852384	chr1	229569877	229569878	ACTA1	58	-33	CGI	TRUE	FALSE	FALSE
cg14992232	chr1	20811153	20811154	CAMK2N1	55450	1573	CGI	FALSE	TRUE	FALSE
cg15015892	chr1	151810887	151810888	LOC100132111	100132111	-56	CGI	TRUE	TRUE	FALSE
cg15030449	chr1	2780395	2780396	TTC34	100287898	-74164	CGI-S-Shore	FALSE	FALSE	TRUE
cg15036616	chr1	15930123	15930124	DDI2	84301	-13828	CGI	FALSE	FALSE	TRUE
cg15076663	chr1	18023561	18023562	ACTL8	81569	-58245	CGI	FALSE	TRUE	FALSE
cg15084543	chr1	79472408	79472409	ELTD1	64123	85	CGI	TRUE	FALSE	FALSE
cg15097019	chr1	28241038	28241039	RPA2	6118	196	CGI	TRUE	FALSE	FALSE
cg15099632	chr1	165738557	165738558	UCK2	7371	-58173	CGI	TRUE	TRUE	FALSE
cg15108640	chr1	240071966	240071967	RPS7P5	645884	-98856	CGI	TRUE	TRUE	FALSE
cg15116327	chr1	32741619	32741620	HDAC1	3065	-16087	CGI	FALSE	TRUE	FALSE
cg15154191	chr1	3527782	3527783	MEGF6	1953	275	CGI	TRUE	FALSE	FALSE
cg15202378	chr1	180199443	180199444	LHX4	89884	9	CGI	TRUE	FALSE	FALSE
cg15207993	chr1	153591313	153591314	S100A14	57402	-2504	Non-CGI	FALSE	TRUE	FALSE
cg15386773	chr1	75139490	75139491	C1orf173	127254	-67	CGI-S-Shore	TRUE	FALSE	FALSE
cg15472210	chr1	232766496	232766497	SIPA1L2	57568	-115252	CGI	FALSE	FALSE	TRUE
cg15481858	chr1	223972634	223972635	TP53BP2	7159	61038	Non-CGI	FALSE	TRUE	FALSE
cg15492552	chr1	1297576	1297577	MXRA8	54587	-418	CGI-S-Shore	TRUE	FALSE	FALSE
cg15521792	chr1	145590148	145590149	NUDT17	200035	-712	CGI-S-Shore	TRUE	FALSE	FALSE
cg15522353	chr1	39547558	39547559	MACF1	23499	468	CGI	FALSE	TRUE	FALSE
cg15550572	chr1	2064441	2064442	C1orf86	199990	74729	CGI	FALSE	TRUE	FALSE
cg15555335	chr1	20208763	20208764	OTUD3	23252	-123	CGI	TRUE	FALSE	FALSE
cg15558129	chr1	219347279	219347280	LYPLAL1	127018	86	CGI	TRUE	FALSE	FALSE
cg15561613	chr1	245851610	245851611	KIF26B	55083	533322	CGI	FALSE	TRUE	FALSE
cg15580417	chr1	160053947	160053948	KCNJ9	3765	2586	CGI	FALSE	TRUE	FALSE
cg15604190	chr1	6052593	6052594	NPHP4	261734	-59	CGI	TRUE	FALSE	FALSE
cg15628917	chr1	60539559	60539560	C1orf87	127795	-116	CGI	TRUE	FALSE	FALSE
cg15642292	chr1	150253842	150253843	C1orf51	148523	-1109	CGI-N-Shore	TRUE	FALSE	FALSE
cg15653910	chr1	20799948	20799949	CAMK2N1	55450	12778	CGI-S-Shore	FALSE	FALSE	TRUE
cg15684811	chr1	59250924	59250925	LOC100131060	100131060	100	CGI	TRUE	FALSE	FALSE
cg15685922	chr1	156045208	156045209	MEX3A	92312	6579	CGI-N-Shore	FALSE	TRUE	FALSE
cg15694180	chr1	155023435	155023436	ADAM15	8751	12	CGI	TRUE	TRUE	FALSE
cg15705054	chr1	154927709	154927710	PBXIP1	57326	856	Non-CGI	TRUE	TRUE	FALSE
cg15717853	chr1	182573596	182573597	RGS16	6004	-47	CGI	TRUE	FALSE	FALSE
cg15818358	chr1	42501757	42501758	HIVEP3	59269	-160	CGI	TRUE	FALSE	FALSE
cg15824543	chr1	1695391	1695392	NADK	65220	16115	CGI-N-Shore	FALSE	TRUE	FALSE
cg15891747	chr1	202896310	202896311	KLHL12	59349	1415	CGI	TRUE	TRUE	FALSE
cg15892864	chr1	161444516	161444517	FCGR2A	2212	-30687	CGI-S-Shore	FALSE	FALSE	TRUE
cg15934415	chr1	115212914	115212915	DENND2C	163259	128	CGI	TRUE	FALSE	FALSE
cg15934879	chr1	26495928	26495929	ZNF593	51042	-458	CGI-N-Shore	TRUE	FALSE	FALSE
cg15979171	chr1	2171212	2171213	SKI	6497	11077	CGI	FALSE	TRUE	FALSE
cg16023415	chr1	20692812	20692813	LOC339505	339505	62473	CGI	FALSE	TRUE	FALSE
cg16026015	chr1	16060480	16060481	SLC25A34	284723	-2327	CGI	FALSE	TRUE	FALSE
cg16028201	chr1	62784802	62784803	KANK4	163782	279	CGI	TRUE	FALSE	FALSE
cg16029875	chr1	204320179	204320180	PLEKHA6	22874	8863	Non-CGI	FALSE	TRUE	FALSE
cg16049941	chr1	228466971	228466972	OBSCN	84033	71109	CGI	TRUE	TRUE	FALSE
cg16134717	chr1	11752494	11752495	DRAXIN	374946	712	CGI	TRUE	TRUE	FALSE
cg16136338	chr1	20208717	20208718	OTUD3	23252	-169	CGI-N-Shore	TRUE	FALSE	FALSE
cg16145216	chr1	42385662	42385663	HIVEP3	59269	115932	CGI-S-Shore	TRUE	TRUE	FALSE
cg16169620	chr1	155827015	155827016	GON4L	54856	2174	CGI	TRUE	TRUE	FALSE
cg16247817	chr1	153747686	153747687	SLC27A3	11000	-80	CGI	TRUE	FALSE	FALSE
cg16258463	chr1	93811274	93811275	LOC100131564	100131564	92	CGI	TRUE	TRUE	FALSE
cg16272425	chr1	2337198	2337199	PEX10	5192	6810	CGI	FALSE	TRUE	FALSE
cg16306900	chr1	182026435	182026436	ZNF648	127665	4410	CGI	TRUE	TRUE	FALSE
cg16314291	chr1	31886585	31886586	SERINC2	347735	4172	CGI	TRUE	TRUE	FALSE
cg16353957	chr1	197880663	197880664	LHX9	56956	-970	CGI	TRUE	FALSE	FALSE
cg16358430	chr1	92952192	92952193	GFI1	2672	239	CGI	TRUE	TRUE	FALSE
cg16384593	chr1	1840436	1840437	CALML6	163688	-5828	CGI	FALSE	FALSE	TRUE
cg16388674	chr1	1910431	1910432	KIAA1751	85452	24843	CGI	FALSE	TRUE	FALSE
cg16391955	chr1	50881185	50881186	DMRTA2	63950	7932	CGI	FALSE	FALSE	TRUE
cg16411979	chr1	117603108	117603109	TTF2	8458	158	CGI	FALSE	TRUE	FALSE
cg16427321	chr1	10917344	10917345	CASZ1	54897	-60636	CGI-N-Shore	FALSE	FALSE	TRUE
cg16430166	chr1	232941468	232941469	MAP10	54627	829	CGI	TRUE	FALSE	FALSE
cg16430402	chr1	5947386	5947387	MIR4689	100616421	-24584	CGI	FALSE	TRUE	FALSE
cg16488304	chr1	151119217	151119218	SEMA6C	10500	-76	CGI	TRUE	FALSE	FALSE
cg16575694	chr1	1273375	1273376	TAS1R3	83756	6648	CGI-S-Shore	FALSE	TRUE	FALSE
cg16580496	chr1	38156394	38156395	C1orf109	54955	1492	CGI	TRUE	TRUE	FALSE
cg16598600	chr1	50891456	50891457	DMRTA2	63950	-2336	CGI	FALSE	FALSE	TRUE
cg16648140	chr1	2434046	2434047	PANK4	55229	23987	CGI	FALSE	TRUE	FALSE
cg16658130	chr1	40942841	40942842	ZFP69	339559	-459	CGI	TRUE	FALSE	FALSE
cg16678437	chr1	245133033	245133034	EFCAB2	84288	-136	CGI	TRUE	FALSE	FALSE
cg16680547	chr1	14027567	14027568	PRDM2	7799	831	CGI-S-Shore	FALSE	TRUE	FALSE
cg16691821	chr1	2375627	2375628	PEX10	5192	-31616	CGI	FALSE	FALSE	TRUE
cg16701939	chr1	112533260	112533261	KCND3	3752	-1482	CGI	TRUE	FALSE	FALSE
cg16704678	chr1	32230177	32230178	BAI2	576	-528	CGI	TRUE	FALSE	FALSE
cg16716189	chr1	113261711	113261712	FAM19A3	284467	-1476	CGI	TRUE	FALSE	FALSE
cg16721191	chr1	185703526	185703527	HMCN1	83872	-155	CGI	TRUE	FALSE	FALSE
cg16815379	chr1	165797173	165797174	TMCO1	54499	-180	CGI	TRUE	TRUE	FALSE
cg16824301	chr1	182573155	182573156	RGS16	6004	391	CGI-N-Shore	FALSE	TRUE	FALSE
cg16900814	chr1	173990879	173990880	RC3H1	149041	-28668	CGI	FALSE	FALSE	TRUE
cg16909962	chr1	229406711	229406712	RAB4A	5867	-166	CGI	TRUE	FALSE	FALSE
cg16993579	chr1	202311052	202311053	UBE2T	29089	40	CGI	TRUE	FALSE	FALSE
cg17024258	chr1	160370982	160370983	VANGL2	57216	750	CGI	FALSE	TRUE	FALSE
cg17024643	chr1	214725274	214725275	PTPN14	5784	-249	CGI	TRUE	FALSE	FALSE
cg17074213	chr1	92351695	92351696	TGFBR3	7049	19862	CGI	TRUE	TRUE	FALSE
cg17077171	chr1	155658509	155658510	DAP3	7818	-371	CGI	TRUE	TRUE	FALSE
cg17098415	chr1	995021	995022	RNF223	401934	14664	CGI	TRUE	FALSE	FALSE
cg17101920	chr1	53192387	53192388	ZYG11B	79699	255	CGI	FALSE	TRUE	FALSE
cg17104258	chr1	167090646	167090647	DUSP27	92235	26574	CGI	FALSE	TRUE	FALSE
cg17104843	chr1	213032108	213032109	FLVCR1	28982	510	CGI	TRUE	FALSE	FALSE
cg17122213	chr1	1564920	1564921	MMP23B	8510	-2638	CGI	FALSE	TRUE	FALSE
cg17130982	chr1	1946008	1946009	GABRD	2563	-4758	CGI-N-Shore	FALSE	TRUE	FALSE
cg17131030	chr1	115632576	115632577	TSPAN2	10100	-454	CGI	TRUE	FALSE	FALSE
cg17142722	chr1	1363280	1363281	TMEM88B	643965	1771	CGI	FALSE	FALSE	TRUE
cg17154605	chr1	44821233	44821234	ERI3	79033	-293	CGI-S-Shore	TRUE	FALSE	FALSE
cg17158913	chr1	10764886	10764887	CASZ1	54897	91819	CGI	FALSE	TRUE	FALSE
cg17161388	chr1	37940077	37940078	LOC728431	728431	-32	CGI	TRUE	FALSE	FALSE
cg17165158	chr1	2182612	2182613	SKI	6497	22477	CGI	FALSE	TRUE	FALSE
cg17178218	chr1	7352249	7352250	VAMP3	9341	-479078	Non-CGI	FALSE	TRUE	FALSE
cg17182302	chr1	116961525	116961526	ATP1A1OS	84852	-280	CGI-S-Shore	TRUE	FALSE	FALSE
cg17184491	chr1	41483645	41483646	SLFNL1-AS1	100507178	3382	CGI-S-Shore	TRUE	TRUE	FALSE
cg17217195	chr1	3673328	3673329	CCDC27	148870	4362	CGI	FALSE	TRUE	FALSE
cg17239770	chr1	2540942	2540943	FAM213B	127281	23042	CGI	FALSE	TRUE	FALSE
cg17243637	chr1	44871099	44871100	RNF220	55182	138	CGI	TRUE	FALSE	FALSE
cg17286074	chr1	3315497	3315498	ARHGEF16	27237	-55648	CGI	FALSE	TRUE	FALSE
cg17412901	chr1	3332705	3332706	ARHGEF16	27237	-38440	CGI-S-Shore	FALSE	TRUE	FALSE
cg17420036	chr1	22182143	22182144	LDLRAD2	401944	43384	Non-CGI	FALSE	TRUE	FALSE
cg17423498	chr1	242011256	242011257	EXO1	9156	-235	CGI	TRUE	FALSE	FALSE
cg17456100	chr1	22140859	22140860	LDLRAD2	401944	2100	CGI	FALSE	TRUE	FALSE
cg17463745	chr1	16554402	16554403	RSG1	79363	9255	CGI	FALSE	FALSE	TRUE
cg17475085	chr1	112525092	112525093	KCND3	3752	6683	CGI	FALSE	TRUE	FALSE
cg17503596	chr1	203764137	203764138	ZC3H11A	9877	-612	CGI-N-Shore	TRUE	FALSE	FALSE
cg17506588	chr1	2365491	2365492	PEX10	5192	-21480	CGI	FALSE	FALSE	TRUE
cg17513182	chr1	153894941	153894942	GATAD2B	57459	508	CGI	FALSE	TRUE	FALSE
cg17589325	chr1	201924583	201924584	TIMM17A	10440	-34	CGI	TRUE	FALSE	FALSE
cg17589890	chr1	210857205	210857206	HHAT	55733	355608	CGI	FALSE	TRUE	FALSE
cg17592853	chr1	29587255	29587256	PTPRU	10076	24226	CGI	FALSE	TRUE	FALSE
cg17600851	chr1	85462857	85462858	MCOLN2	255231	-60	CGI	TRUE	FALSE	FALSE
cg17716664	chr1	165204799	165204800	LMX1A	4009	121151	CGI	FALSE	TRUE	FALSE
cg17722231	chr1	1851035	1851036	TMEM52	339456	-294	CGI	TRUE	FALSE	FALSE
cg17786206	chr1	29142254	29142255	OPRD1	4985	3599	CGI-S-Shelf	FALSE	TRUE	FALSE
cg17809276	chr1	172501547	172501548	SUCO	51430	-711	CGI	TRUE	FALSE	FALSE
cg17820306	chr1	156339286	156339287	RHBG	57127	282	CGI-S-Shore	FALSE	TRUE	FALSE
cg17827328	chr1	36817299	36817300	EVA1B	55194	-27543	Non-CGI	FALSE	TRUE	FALSE
cg17833169	chr1	67600547	67600548	C1orf141	400757	104	CGI	FALSE	TRUE	FALSE
cg17836940	chr1	26758808	26758809	DHDDS	79947	34	CGI	TRUE	FALSE	FALSE
cg17838705	chr1	112298602	112298603	FAM212B	55924	-182	CGI	TRUE	FALSE	FALSE
cg17841765	chr1	22560699	22560700	WNT4	54361	-90313	Non-CGI	FALSE	FALSE	TRUE
cg17841782	chr1	59762205	59762206	FGGY	55277	-418	CGI	TRUE	FALSE	FALSE
cg17848003	chr1	3704513	3704514	LRRC47	57470	8553	CGI	FALSE	TRUE	FALSE
cg17854320	chr1	24829245	24829246	RCAN3AS	100750325	-394	CGI	TRUE	TRUE	FALSE
cg17873612	chr1	23279531	23279532	LOC729059	729059	62810	CGI-N-Shore	FALSE	FALSE	TRUE
cg17908602	chr1	117317903	117317904	CD2	914	20816	CGI	FALSE	FALSE	TRUE
cg17928286	chr1	205414220	205414221	MIR135B	442891	3304	Non-CGI	FALSE	FALSE	TRUE
cg17940849	chr1	3193280	3193281	MIR4251	100422968	148740	CGI	FALSE	TRUE	FALSE
cg17941572	chr1	63784454	63784455	LINC00466	199899	-1552	CGI	TRUE	FALSE	FALSE
cg17947461	chr1	87797169	87797170	LMO4	8543	3017	CGI	TRUE	TRUE	FALSE
cg17949727	chr1	38412684	38412685	INPP5B	3633	43	Non-CGI	TRUE	FALSE	FALSE
cg17973565	chr1	153606594	153606595	S100A13	6284	-25	CGI	TRUE	FALSE	FALSE
cg17974166	chr1	23280069	23280070	LOC729059	729059	62272	CGI	FALSE	FALSE	TRUE
cg18021902	chr1	3567119	3567120	WRAP73	49856	-447	CGI-S-Shore	TRUE	FALSE	FALSE
cg18086187	chr1	10057158	10057159	RBP7	116362	-95	CGI	TRUE	FALSE	FALSE
cg18128887	chr1	24861708	24861709	NCMAP	400746	-20857	CGI-N-Shore	FALSE	TRUE	FALSE
cg18131141	chr1	36043002	36043003	TFAP2E	339488	4030	CGI	FALSE	TRUE	FALSE
cg18133145	chr1	16060689	16060690	SLC25A34	284723	-2118	CGI	FALSE	TRUE	FALSE
cg18136681	chr1	24969531	24969532	SRRM1	10250	-61	CGI	TRUE	FALSE	FALSE
cg18146737	chr1	92946700	92946701	GFI1	2672	5731	CGI	FALSE	TRUE	FALSE
cg18158385	chr1	95392678	95392679	CNN3	1266	55	CGI	TRUE	FALSE	FALSE
cg18172804	chr1	146714232	146714233	CHD1L	9557	-57	CGI	TRUE	FALSE	FALSE
cg18174258	chr1	247275326	247275327	C1orf229	388759	391	CGI	TRUE	FALSE	FALSE
cg18192083	chr1	6086254	6086255	NPHP4	261734	-33720	CGI-N-Shore	TRUE	TRUE	FALSE
cg18194353	chr1	100315666	100315667	AGL	178	25	CGI	TRUE	FALSE	FALSE
cg18198730	chr1	247681584	247681585	GCSAML	148823	11189	CGI	TRUE	TRUE	FALSE
cg18275321	chr1	70820640	70820641	HHLA3	11147	146	CGI	TRUE	FALSE	FALSE
cg18279134	chr1	16394568	16394569	FAM131C	348487	5557	Non-CGI	FALSE	TRUE	FALSE
cg18324862	chr1	6328955	6328956	GPR153	387509	-7919	CGI	FALSE	TRUE	FALSE
cg18325794	chr1	32083737	32083738	HCRTR1	3061	435	CGI	TRUE	TRUE	FALSE
cg18344652	chr1	95393096	95393097	CNN3	1266	-360	CGI	TRUE	FALSE	FALSE
cg18387017	chr1	1167389	1167390	SDF4	51150	56	CGI	TRUE	FALSE	FALSE
cg18434712	chr1	32817681	32817682	FAM229A	100128071	10161	CGI	FALSE	FALSE	TRUE
cg18788524	chr1	145096602	145096603	SEC22B	9554	194	CGI	TRUE	TRUE	FALSE
cg18794839	chr1	215256262	215256263	KCNK2	3776	77376	CGI	TRUE	TRUE	FALSE
cg18814048	chr1	151580708	151580709	SNX27	81609	-3952	CGI-N-Shelf	FALSE	FALSE	TRUE
cg18862597	chr1	17265457	17265458	MFAP2	4237	42622	CGI-N-Shore	TRUE	TRUE	FALSE
cg18877525	chr1	244303292	244303293	ZBTB18	10472	88730	CGI	FALSE	FALSE	TRUE
cg18878886	chr1	21031238	21031239	KIF17	57576	13077	CGI	FALSE	TRUE	FALSE
cg18885107	chr1	46664327	46664328	LURAP1	541468	-4677	CGI-S-Shore	TRUE	TRUE	FALSE
cg18935813	chr1	111149153	111149154	KCNA2	3737	24941	CGI	TRUE	TRUE	FALSE
cg19081571	chr1	1190137	1190138	FAM132A	388581	-8034	CGI	FALSE	TRUE	FALSE
cg19082003	chr1	231004179	231004180	C1orf198	84886	1154	CGI	TRUE	TRUE	FALSE
cg19084726	chr1	145075538	145075539	PDE4DIP	9659	646	CGI	FALSE	TRUE	FALSE
cg19159602	chr1	29557611	29557612	MECR	51102	-156	CGI	TRUE	FALSE	FALSE
cg19236794	chr1	1181769	1181770	FAM132A	388581	331	CGI	FALSE	TRUE	FALSE
cg19241954	chr1	208421318	208421319	PLXNA2	5362	-3652	CGI-S-Shelf	FALSE	FALSE	TRUE
cg19249107	chr1	55505954	55505955	PCSK9	255738	804	CGI	TRUE	TRUE	FALSE
cg19265480	chr1	147781887	147781888	PPIAL4B	653505	173530	CGI	TRUE	TRUE	FALSE
cg19304150	chr1	114696350	114696351	SYT6	148281	120	CGI	TRUE	FALSE	FALSE
cg19306368	chr1	59235016	59235017	JUN	3725	14767	CGI	FALSE	FALSE	TRUE
cg19317333	chr1	3319433	3319434	ARHGEF16	27237	-51712	CGI-N-Shore	TRUE	TRUE	FALSE
cg19356191	chr1	116371337	116371338	NHLH2	4808	12408	CGI	FALSE	FALSE	TRUE
cg19361865	chr1	220922163	220922164	MARC2	54996	486	CGI	FALSE	TRUE	FALSE
cg19367540	chr1	112531802	112531803	KCND3	3752	-24	CGI	TRUE	FALSE	FALSE
cg19374457	chr1	44412380	44412381	IPO13	9670	-96	CGI	TRUE	FALSE	FALSE
cg19414591	chr1	91190582	91190583	BARHL2	343472	-7787	CGI	FALSE	FALSE	TRUE
cg19590227	chr1	10755322	10755323	CASZ1	54897	101383	CGI	TRUE	TRUE	FALSE
cg19598416	chr1	223936812	223936813	CAPN2	824	47516	CGI	FALSE	TRUE	FALSE
cg19601664	chr1	117284614	117284615	CD2	914	-12470	CGI	FALSE	FALSE	TRUE
cg19645639	chr1	113500384	113500385	SLC16A1	6566	-1408	CGI-S-Shore	TRUE	TRUE	FALSE
cg19694978	chr1	40420603	40420604	MFSD2A	84879	-179	CGI	TRUE	FALSE	FALSE
cg19706449	chr1	47133793	47133794	ATPAF1	64756	304	CGI	TRUE	TRUE	FALSE
cg19726343	chr1	7515595	7515596	VAMP3	9341	-315732	CGI-N-Shore	FALSE	TRUE	FALSE
cg19730691	chr1	119526437	119526438	TBX15	6913	5740	CGI	FALSE	TRUE	FALSE
cg19732653	chr1	245848798	245848799	KIF26B	55083	530510	CGI	FALSE	TRUE	FALSE
cg19756726	chr1	11596578	11596579	PTCHD2	57540	57282	CGI	FALSE	TRUE	FALSE
cg19803229	chr1	2005320	2005321	PRKCZ	5590	23410	CGI	TRUE	TRUE	FALSE
cg19811087	chr1	91184501	91184502	BARHL2	343472	-1706	CGI	TRUE	FALSE	FALSE
cg19811864	chr1	155036142	155036143	EFNA3	1944	-69	CGI	TRUE	TRUE	FALSE
cg19820919	chr1	9380800	9380801	SPSB1	80176	27858	CGI	FALSE	TRUE	FALSE
cg19827716	chr1	181287967	181287968	CACNA1E	777	-164717	CGI	FALSE	FALSE	TRUE
cg19827787	chr1	23763612	23763613	TCEA3	6920	-12350	CGI	TRUE	TRUE	FALSE
cg19856705	chr1	234667500	234667501	LOC100506795	100506795	23	CGI	TRUE	FALSE	FALSE
cg20011075	chr1	4008090	4008091	LOC728716	728716	7417	Non-CGI	FALSE	TRUE	FALSE
cg20144521	chr1	2237543	2237544	LOC100129534	100129534	46555	CGI	FALSE	TRUE	FALSE
cg20146241	chr1	24861604	24861605	NCMAP	400746	-20961	CGI-N-Shore	FALSE	TRUE	FALSE
cg20163085	chr1	10510396	10510397	CORT	1325	619	Non-CGI	FALSE	TRUE	FALSE
cg20168230	chr1	37499649	37499650	GRIK3	2899	193	CGI	TRUE	FALSE	FALSE
cg20242752	chr1	179713091	179713092	FAM163A	148753	16175	CGI	FALSE	TRUE	FALSE
cg20255817	chr1	1597454	1597455	MMP23B	8510	29893	CGI	FALSE	TRUE	FALSE
cg20271029	chr1	46859845	46859846	FAAH	2166	-92	CGI	TRUE	FALSE	FALSE
cg20282741	chr1	53704012	53704013	LOC100507564	100507564	-268	CGI	TRUE	TRUE	FALSE
cg20296524	chr1	234614614	234614615	TARBP1	6894	233	CGI	TRUE	FALSE	FALSE
cg20298273	chr1	156897330	156897331	LRRC71	149499	6905	CGI	FALSE	TRUE	FALSE
cg20303021	chr1	223316476	223316477	TLR5	7100	146	CGI	FALSE	TRUE	FALSE
cg20311863	chr1	91184126	91184127	BARHL2	343472	-1331	CGI	TRUE	FALSE	FALSE
cg20313496	chr1	155579807	155579808	MSTO1	55154	-198	CGI	TRUE	FALSE	FALSE
cg20314620	chr1	3816831	3816832	C1orf174	339448	24	CGI	TRUE	FALSE	FALSE
cg20327061	chr1	6640478	6640479	ZBTB48	3104	421	CGI	FALSE	TRUE	FALSE
cg20335425	chr1	153363264	153363265	S100A8	6279	398	Non-CGI	FALSE	TRUE	FALSE
cg20413202	chr1	10056853	10056854	RBP7	116362	-400	CGI-N-Shore	TRUE	FALSE	FALSE
cg20511194	chr1	45987619	45987620	PRDX1	5052	941	CGI	TRUE	TRUE	FALSE
cg20511268	chr1	45805845	45805846	MUTYH	4595	295	CGI	TRUE	TRUE	FALSE
cg20594982	chr1	976707	976708	AGRN	375790	21203	CGI	FALSE	TRUE	FALSE
cg20611911	chr1	3567930	3567931	TP73	7161	-1197	CGI	TRUE	FALSE	FALSE
cg20613337	chr1	21113199	21113200	HP1BP3	50809	598	CGI	TRUE	TRUE	FALSE
cg20613432	chr1	2799579	2799580	TTC34	100287898	-93348	CGI	FALSE	FALSE	TRUE
cg20630560	chr1	228395858	228395859	OBSCN	84033	-1	CGI-N-Shelf	TRUE	TRUE	FALSE
cg20673091	chr1	2541236	2541237	MMEL1	79258	23243	CGI-S-Shore	FALSE	TRUE	FALSE
cg20707222	chr1	76540222	76540223	ST6GALNAC3	256435	-165	CGI	TRUE	FALSE	FALSE
cg20773915	chr1	6171788	6171789	CHD5	26038	68404	CGI	FALSE	TRUE	FALSE
cg20792512	chr1	22469190	22469191	WNT4	54361	1193	CGI	FALSE	TRUE	FALSE
cg20801456	chr1	226099031	226099032	LEFTY1	10637	12932	CGI	FALSE	TRUE	FALSE
cg20810398	chr1	11159847	11159848	EXOSC10	5394	89	CGI	TRUE	FALSE	FALSE
cg20815701	chr1	110454063	110454064	CSF1	1435	829	CGI-S-Shore	FALSE	TRUE	FALSE
cg20826345	chr1	2350197	2350198	PEX10	5192	-6186	CGI-S-Shore	FALSE	FALSE	TRUE
cg20828333	chr1	5927556	5927557	MIR4689	100616421	-4754	CGI-S-Shore	FALSE	TRUE	FALSE
cg20846236	chr1	32645337	32645338	TXLNA	200081	-6	CGI	TRUE	FALSE	FALSE
cg20847090	chr1	23763959	23763960	TCEA3	6920	-12697	CGI-S-Shore	TRUE	TRUE	FALSE
cg20869257	chr1	201252948	201252949	PKP1	5317	367	CGI	TRUE	FALSE	FALSE
cg20994490	chr1	63988814	63988815	ITGB3BP	23421	128	CGI	TRUE	FALSE	FALSE
cg21010995	chr1	5927942	5927943	MIR4689	100616421	-5140	CGI-S-Shore	TRUE	TRUE	FALSE
cg21113740	chr1	79472343	79472344	ELTD1	64123	150	CGI	TRUE	FALSE	FALSE
cg21140898	chr1	51442318	51442319	CDKN2C	1031	8709	CGI	FALSE	FALSE	TRUE
cg21147983	chr1	11897631	11897632	NPPA-AS1	100379251	-2743	CGI	FALSE	TRUE	FALSE
cg21273275	chr1	24648328	24648329	GRHL3	57822	2515	CGI	TRUE	TRUE	FALSE
cg21302420	chr1	112162376	112162377	LOC100129269	100129269	-11435	CGI	TRUE	TRUE	FALSE
cg21399703	chr1	247681439	247681440	GCSAML	148823	11044	CGI	TRUE	TRUE	FALSE
cg21409895	chr1	59012418	59012419	OMA1	115209	26	CGI	TRUE	FALSE	FALSE
cg21440584	chr1	231155682	231155683	MIR1182	100302132	-11	CGI-N-Shore	TRUE	TRUE	FALSE
cg21455438	chr1	208084436	208084437	CD34	947	245	CGI	TRUE	FALSE	FALSE
cg21576698	chr1	46767971	46767972	LRRC41	10489	1065	CGI	TRUE	TRUE	FALSE
cg21604357	chr1	3027471	3027472	MIR4251	100422968	-17066	CGI-N-Shore	FALSE	TRUE	FALSE
cg21609640	chr1	166890380	166890381	TADA1	117143	-44725	CGI	FALSE	TRUE	FALSE
cg21646186	chr1	110052458	110052459	AMIGO1	57463	-121	CGI	TRUE	FALSE	FALSE
cg21679391	chr1	1286917	1286918	DVL1	1855	-2424	CGI	FALSE	FALSE	TRUE
cg21693788	chr1	244998183	244998184	COX20	116228	-454	CGI	TRUE	FALSE	FALSE
cg21774754	chr1	212873477	212873478	BATF3	55509	-149	CGI	TRUE	FALSE	FALSE
cg21778193	chr1	1098070	1098071	MIR200B	406984	-4412	CGI	FALSE	FALSE	TRUE
cg21818533	chr1	203299859	203299860	FMOD	2331	20428	CGI-S-Shelf	FALSE	FALSE	TRUE
cg21826784	chr1	11795937	11795938	AGTRAP	57085	-203	CGI-N-Shore	TRUE	FALSE	FALSE
cg21830313	chr1	3528077	3528078	MEGF6	1953	-17	CGI	TRUE	FALSE	FALSE
cg21848143	chr1	39269995	39269996	MYCBP	26292	69053	CGI	FALSE	FALSE	TRUE
cg21863110	chr1	116380417	116380418	NHLH2	4808	3328	CGI	FALSE	TRUE	FALSE
cg21868050	chr1	155231980	155231981	SCAMP3	10067	194	CGI	TRUE	FALSE	FALSE
cg21877201	chr1	47070058	47070059	MOB3C	148932	12503	CGI	TRUE	TRUE	FALSE
cg21906083	chr1	160772137	160772138	LY9	4063	6208	CGI	FALSE	TRUE	FALSE
cg21908235	chr1	146551744	146551745	LOC728989	728989	-37144	CGI	FALSE	FALSE	TRUE
cg21915639	chr1	46769308	46769309	UQCRH	7388	-70	CGI	TRUE	FALSE	FALSE
cg21930399	chr1	94883754	94883755	ABCD3	5825	-177	CGI	TRUE	FALSE	FALSE
cg21936179	chr1	206786180	206786181	EIF2D	1939	-275	CGI-S-Shore	TRUE	FALSE	FALSE
cg21943599	chr1	179333589	179333590	AXDND1	126859	-1264	CGI-N-Shore	TRUE	FALSE	FALSE
cg21959334	chr1	228579038	228579039	TRIM11	81559	15477	CGI-N-Shelf	FALSE	FALSE	TRUE
cg22042144	chr1	211432745	211432746	RCOR3	55758	36	CGI	TRUE	FALSE	FALSE
cg22109530	chr1	178310534	178310535	TEX35	84066	-171676	Non-CGI	TRUE	TRUE	FALSE
cg22123915	chr1	86047807	86047808	CYR61	3491	1362	CGI	TRUE	TRUE	FALSE
cg22167515	chr1	91192466	91192467	BARHL2	343472	-9671	CGI	FALSE	FALSE	TRUE
cg22234529	chr1	3616498	3616499	TP73	7161	47368	CGI	FALSE	TRUE	FALSE
cg22333259	chr1	19394757	19394758	IFFO2	126917	-111930	Non-CGI	FALSE	FALSE	TRUE
cg22337407	chr1	11046185	11046186	C1orf127	148345	-4090	Non-CGI	FALSE	FALSE	TRUE
cg22343327	chr1	84819379	84819380	UOX	391051	44195	Non-CGI	FALSE	FALSE	TRUE
cg22371492	chr1	170637796	170637797	PRRX1	5396	4482	CGI	FALSE	TRUE	FALSE
cg22372182	chr1	223566669	223566670	C1orf65	164127	-44	CGI-N-Shore	TRUE	FALSE	FALSE
cg22376366	chr1	1275137	1275138	TAS1R3	83756	8410	CGI	TRUE	TRUE	FALSE
cg22380385	chr1	1885948	1885949	TMEM52	339456	-35207	CGI-N-Shore	FALSE	TRUE	FALSE
cg22389730	chr1	161697241	161697242	FCRLB	127943	5906	CGI	FALSE	TRUE	FALSE
cg22391718	chr1	110326285	110326286	EPS8L3	79574	-19640	Non-CGI	FALSE	FALSE	TRUE
cg22399423	chr1	169075400	169075401	ATP1B1	481	-545	CGI	TRUE	FALSE	FALSE
cg22433862	chr1	28013341	28013342	IFI6	2537	-14616	Non-CGI	FALSE	FALSE	TRUE
cg22451657	chr1	6558088	6558089	PLEKHG5	57449	21979	CGI	TRUE	TRUE	FALSE
cg22488975	chr1	184724009	184724010	EDEM3	80267	30	CGI	TRUE	FALSE	FALSE
cg22492252	chr1	16302707	16302708	ZBTB17	7709	-79	CGI-S-Shore	TRUE	FALSE	FALSE
cg22495848	chr1	2425173	2425174	PLCH2	9651	17418	CGI	FALSE	TRUE	FALSE
cg22527425	chr1	21044753	21044754	KIF17	57576	-435	CGI	TRUE	FALSE	FALSE
cg22536808	chr1	45965870	45965871	MMACHC	25974	13	CGI	TRUE	FALSE	FALSE
cg22608265	chr1	3351106	3351107	ARHGEF16	27237	-20039	CGI	FALSE	TRUE	FALSE
cg22609277	chr1	111746873	111746874	DENND2D	79961	156	CGI	FALSE	TRUE	FALSE
cg22619719	chr1	1891578	1891579	TMEM52	339456	-40837	CGI-S-Shore	FALSE	TRUE	FALSE
cg22621686	chr1	35260256	35260257	GJA4	2701	2084	CGI	TRUE	TRUE	FALSE
cg22675207	chr1	33631052	33631053	TRIM62	55223	16617	Non-CGI	FALSE	TRUE	FALSE
cg22682031	chr1	151585010	151585011	SNX27	81609	347	CGI	FALSE	TRUE	FALSE
cg22690212	chr1	145438435	145438436	TXNIP	10628	-25	CGI	TRUE	FALSE	FALSE
cg22700015	chr1	228743131	228743132	DUSP5P1	574029	-37261	CGI	FALSE	FALSE	TRUE
cg22708961	chr1	2254245	2254246	LOC100129534	100129534	29853	CGI	FALSE	TRUE	FALSE
cg22712840	chr1	2026193	2026194	PRKCZ	5590	44283	CGI	FALSE	TRUE	FALSE
cg22728128	chr1	112299491	112299492	FAM212B	55924	-1071	CGI-S-Shore	TRUE	TRUE	FALSE
cg22789900	chr1	226411715	226411716	MIXL1	83881	331	CGI	TRUE	FALSE	FALSE
cg22790758	chr1	15013167	15013168	KAZN	23254	87953	Non-CGI	FALSE	TRUE	FALSE
cg22795216	chr1	47078649	47078650	MOB3C	148932	3912	CGI	FALSE	TRUE	FALSE
cg22851420	chr1	40149650	40149651	HPCAL4	51440	7437	CGI	FALSE	TRUE	FALSE
cg22857567	chr1	33116716	33116717	RBBP4	5928	-31	CGI	TRUE	FALSE	FALSE
cg22871801	chr1	19245969	19245970	ALDH4A1	8659	-16675	CGI	FALSE	TRUE	FALSE
cg23002761	chr1	16085642	16085643	FBLIM1	54751	2487	CGI	FALSE	TRUE	FALSE
cg23015118	chr1	2232527	2232528	LOC100129534	100129534	51571	CGI	FALSE	TRUE	FALSE
cg23021014	chr1	24477083	24477084	IL22RA1	58985	-7307	CGI	FALSE	FALSE	TRUE
cg23022344	chr1	24969466	24969467	SRRM1	10250	-126	CGI	TRUE	FALSE	FALSE
cg23029526	chr1	21616984	21616985	LOC100506801	100506801	-2797	CGI	TRUE	TRUE	FALSE
cg23049458	chr1	62660624	62660625	L1TD1	54596	149	CGI	FALSE	TRUE	FALSE
cg23087108	chr1	1120617	1120618	TTLL10	254173	11330	CGI	FALSE	TRUE	FALSE
cg23093692	chr1	234367145	234367146	MIR4671	100616380	-75066	CGI	FALSE	TRUE	FALSE
cg23098018	chr1	9775755	9775756	C1orf200	644997	-61110	CGI	TRUE	TRUE	FALSE
cg23098020	chr1	153651886	153651887	NPR1	4881	721	CGI	TRUE	FALSE	FALSE
cg23163013	chr1	3606892	3606893	TP73	7161	37762	CGI-N-Shore	TRUE	TRUE	FALSE
cg23166857	chr1	1149501	1149502	TNFRSF4	7293	45	CGI	TRUE	FALSE	FALSE
cg23166865	chr1	63539729	63539730	LINC00466	199899	243170	CGI	FALSE	FALSE	TRUE
cg23231974	chr1	11994899	11994900	PLOD1	5351	174	CGI	TRUE	FALSE	FALSE
cg23236404	chr1	26232706	26232707	MIR3917	100500808	237	CGI	TRUE	TRUE	FALSE
cg23239574	chr1	228653136	228653137	MIR4666A	100616308	3360	CGI	TRUE	FALSE	FALSE
cg23244095	chr1	1476269	1476270	TMEM240	339453	-528	CGI	TRUE	FALSE	FALSE
cg23257934	chr1	234858982	234858983	LOC100506810	100506810	-805	Non-CGI	TRUE	FALSE	FALSE
cg23281527	chr1	18809531	18809532	KLHDC7A	127707	2106	CGI	TRUE	FALSE	FALSE
cg23291161	chr1	201368914	201368915	LAD1	3898	-244	CGI	TRUE	FALSE	FALSE
cg23394673	chr1	1149211	1149212	TNFRSF4	7293	335	CGI	FALSE	TRUE	FALSE
cg23599716	chr1	44686794	44686795	DMAP1	55929	7668	Non-CGI	FALSE	TRUE	FALSE
cg23606286	chr1	145470592	145470593	ANKRD34A	284615	83	CGI	TRUE	FALSE	FALSE
cg23613205	chr1	246887766	246887767	SCCPDH	51097	387	CGI	TRUE	FALSE	FALSE
cg23618323	chr1	184723951	184723952	EDEM3	80267	88	CGI	TRUE	FALSE	FALSE
cg23624671	chr1	63833285	63833286	ALG6	29929	23	CGI	TRUE	FALSE	FALSE
cg23630468	chr1	200379166	200379167	ZNF281	23528	0	CGI	TRUE	FALSE	FALSE
cg23650482	chr1	150266227	150266228	MRPS21	54460	-40	CGI	TRUE	FALSE	FALSE
cg23665250	chr1	2450022	2450023	PANK4	55229	8011	CGI	FALSE	TRUE	FALSE
cg23670372	chr1	10732290	10732291	CASZ1	54897	124415	CGI-N-Shore	FALSE	TRUE	FALSE
cg23695504	chr1	247275344	247275345	C1orf229	388759	373	CGI	TRUE	FALSE	FALSE
cg23723105	chr1	68150193	68150194	GADD45A	1647	-665	CGI-N-Shore	TRUE	FALSE	FALSE
cg23730181	chr1	70033739	70033740	LRRC7	57554	870	CGI	TRUE	FALSE	FALSE
cg23779106	chr1	161719820	161719821	DUSP12	11266	238	CGI	TRUE	FALSE	FALSE
cg23807924	chr1	246860361	246860362	SCCPDH	51097	-27015	CGI-S-Shore	FALSE	FALSE	TRUE
cg23842386	chr1	225840831	225840832	ENAH	55740	12	CGI	TRUE	FALSE	FALSE
cg23847109	chr1	40783060	40783061	COL9A2	1298	0	CGI	TRUE	FALSE	FALSE
cg23857197	chr1	224033831	224033832	TP53BP2	7159	-156	CGI	TRUE	FALSE	FALSE
cg23890506	chr1	155023350	155023351	ADAM15	8751	-70	CGI	TRUE	TRUE	FALSE
cg23931819	chr1	1245076	1245077	ACAP3	116983	-86	CGI	TRUE	TRUE	FALSE
cg23971170	chr1	165326269	165326270	LMX1A	4009	-316	CGI	TRUE	FALSE	FALSE
cg23981150	chr1	161111090	161111091	DEDD	9191	-8611	CGI	FALSE	FALSE	TRUE
cg23984035	chr1	2719864	2719865	TTC34	100287898	-13633	CGI-N-Shore	FALSE	FALSE	TRUE
cg23987789	chr1	7842406	7842407	PER3	8863	-1972	CGI-N-Shore	TRUE	FALSE	FALSE
cg23992403	chr1	226012347	226012348	EPHX1	2052	14549	Non-CGI	TRUE	TRUE	FALSE
cg23992410	chr1	214160848	214160849	PROX1	5629	-436	CGI	TRUE	FALSE	FALSE
cg24003898	chr1	36348317	36348318	2001-08-01	26523	12907	CGI-N-Shore	TRUE	TRUE	FALSE
cg24040576	chr1	246670459	246670460	SMYD3	64754	183	CGI	TRUE	FALSE	FALSE
cg24043628	chr1	225960108	225960109	SRP9	6726	-5405	Non-CGI	FALSE	FALSE	TRUE
cg24080008	chr1	38600199	38600200	MIR3659	100500801	45295	CGI	FALSE	FALSE	TRUE
cg24090393	chr1	1560804	1560805	MMP23B	8510	-6754	CGI	FALSE	TRUE	FALSE
cg24143129	chr1	22921120	22921121	EPHA8	2046	31115	CGI-S-Shore	FALSE	TRUE	FALSE
cg24153003	chr1	151736681	151736682	MRPL9	65005	-640	CGI-S-Shore	TRUE	TRUE	FALSE
cg24154024	chr1	228550401	228550402	TRIM11	81559	44114	CGI-S-Shelf	FALSE	TRUE	FALSE
cg24155871	chr1	75139347	75139348	C1orf173	127254	73	CGI	TRUE	FALSE	FALSE
cg24162759	chr1	224622126	224622127	WDR26	80232	-124	CGI	TRUE	FALSE	FALSE
cg24296484	chr1	154298543	154298544	ATP8B2	57198	506	CGI-S-Shore	TRUE	TRUE	FALSE
cg24304972	chr1	9663509	9663510	TMEM201	199953	14576	CGI-N-Shore	FALSE	TRUE	FALSE
cg24306982	chr1	119549312	119549313	TBX15	6913	-17132	CGI	FALSE	FALSE	TRUE
cg24314057	chr1	192778043	192778044	RGS2	5997	-124	CGI	TRUE	FALSE	FALSE
cg24326661	chr1	154909296	154909297	PMVK	10654	186	CGI	TRUE	FALSE	FALSE
cg24343413	chr1	151735844	151735845	MRPL9	65005	194	CGI	TRUE	TRUE	FALSE
cg24364143	chr1	33005702	33005703	ZBTB8A	653121	75043	CGI	FALSE	TRUE	FALSE
cg24375409	chr1	38200920	38200921	EPHA10	284656	29902	CGI-N-Shore	FALSE	TRUE	FALSE
cg24393673	chr1	102312610	102312611	DNAJA1P5	94236	-24955	Non-CGI	TRUE	TRUE	FALSE
cg24397815	chr1	50798944	50798945	DMRTA2	63950	90173	CGI	FALSE	FALSE	TRUE
cg24400630	chr1	89728035	89728036	GBP5	115362	10507	Non-CGI	FALSE	TRUE	FALSE
cg24408603	chr1	179851256	179851257	TOR1AIP1	26092	-162	CGI	TRUE	FALSE	FALSE
cg24444923	chr1	23280477	23280478	LOC729059	729059	61864	CGI	FALSE	FALSE	TRUE
cg24452347	chr1	24229300	24229301	CNR2	1269	10515	CGI	FALSE	TRUE	FALSE
cg24458833	chr1	28286034	28286035	XKR8	55113	-468	CGI-S-Shore	TRUE	FALSE	FALSE
cg24466241	chr1	53308908	53308909	ZYG11A	440590	724	CGI	FALSE	TRUE	FALSE
cg24484895	chr1	2771846	2771847	TTC34	100287898	-65615	CGI	FALSE	FALSE	TRUE
cg24486037	chr1	151345181	151345182	SELENBP1	8991	-16	Non-CGI	TRUE	FALSE	FALSE
cg24499975	chr1	236958184	236958185	MTR	4548	-395	CGI-N-Shore	TRUE	FALSE	FALSE
cg24508409	chr1	112298175	112298176	DDX20	11218	-13	CGI	TRUE	TRUE	FALSE
cg24517252	chr1	249200781	249200782	PGBD2	267002	338	CGI	FALSE	TRUE	FALSE
cg24524850	chr1	44496039	44496040	SLC6A9	6536	1093	CGI	FALSE	TRUE	FALSE
cg24544320	chr1	226825435	226825436	C1orf95	375057	88933	Non-CGI	FALSE	TRUE	FALSE
cg24550298	chr1	8386089	8386090	SLC45A1	50651	1698	CGI	FALSE	TRUE	FALSE
cg24588482	chr1	160370253	160370254	VANGL2	57216	21	CGI	TRUE	TRUE	FALSE
cg24592462	chr1	42801081	42801082	FOXJ3	22887	465	CGI	TRUE	TRUE	FALSE
cg24593630	chr1	26496180	26496181	ZNF593	51042	-206	CGI-N-Shore	TRUE	FALSE	FALSE
cg24597774	chr1	9400775	9400776	SPSB1	80176	47833	Non-CGI	FALSE	TRUE	FALSE
cg24634568	chr1	43250769	43250770	LOC100129924	100129924	-2890	CGI	FALSE	FALSE	TRUE
cg24641302	chr1	165087025	165087026	LMX1A	4009	238925	CGI-S-Shore	FALSE	FALSE	TRUE
cg24641654	chr1	1860337	1860338	TMEM52	339456	-9596	CGI-S-Shore	TRUE	FALSE	FALSE
cg24645681	chr1	160952703	160952704	ITLN2	142683	-28113	CGI	FALSE	FALSE	TRUE
cg24658517	chr1	221065322	221065323	HLX	3142	12578	CGI	FALSE	FALSE	TRUE
cg24674680	chr1	227174512	227174513	ADCK3	56997	89922	CGI-S-Shore	FALSE	TRUE	FALSE
cg24680497	chr1	3343694	3343695	ARHGEF16	27237	-27451	CGI	FALSE	TRUE	FALSE
cg24695972	chr1	117113752	117113753	CD58	965	-36	CGI	TRUE	FALSE	FALSE
cg24709511	chr1	2251570	2251571	LOC100129534	100129534	32528	CGI-S-Shore	FALSE	FALSE	TRUE
cg24713770	chr1	20649959	20649960	VWA5B1	127731	32546	Non-CGI	FALSE	TRUE	FALSE
cg24718367	chr1	11740508	11740509	MAD2L2	10459	11168	CGI	FALSE	TRUE	FALSE
cg24720336	chr1	151170427	151170428	PIP5K1A	8394	-592	CGI-N-Shore	TRUE	FALSE	FALSE
cg24880044	chr1	204913460	204913461	CNTN2	6900	-98603	Non-CGI	TRUE	TRUE	FALSE
cg24924936	chr1	78957203	78957204	PTGFR	5737	474	CGI	FALSE	TRUE	FALSE
cg24934561	chr1	3663902	3663903	TP73-AS1	57212	33	CGI	TRUE	FALSE	FALSE
cg24940499	chr1	29508807	29508808	SRSF4	6429	-169	CGI	TRUE	FALSE	FALSE
cg24943329	chr1	27319836	27319837	TRNP1	388610	-357	CGI	TRUE	TRUE	FALSE
cg25001930	chr1	147801789	147801790	PPIAL4B	653505	153628	CGI	FALSE	TRUE	FALSE
cg25007722	chr1	247803033	247803034	OR13G1	441933	33308	CGI	FALSE	FALSE	TRUE
cg25018801	chr1	48191031	48191032	TRABD2B	388630	271529	CGI	FALSE	FALSE	TRUE
cg25031777	chr1	164528501	164528502	PBX1	5087	-94	CGI-S-Shore	TRUE	FALSE	FALSE
cg25035631	chr1	35586358	35586359	ZMYM1	79830	41385	CGI-N-Shore	FALSE	FALSE	TRUE
cg25061864	chr1	247464677	247464678	ZNF496	84838	30366	CGI-S-Shore	FALSE	TRUE	FALSE
cg25066040	chr1	936229	936230	HES4	57801	-676	CGI	TRUE	FALSE	FALSE
cg25104133	chr1	178501588	178501589	C1orf220	400798	-10341	Non-CGI	FALSE	TRUE	FALSE
cg25104186	chr1	34098967	34098968	ZSCAN20	7579	160734	CGI	FALSE	TRUE	FALSE
cg25108841	chr1	20959920	20959921	PINK1	65018	-26	CGI	TRUE	FALSE	FALSE
cg25147376	chr1	166890293	166890294	TADA1	117143	-44638	CGI	FALSE	TRUE	FALSE
cg25149069	chr1	233464229	233464230	KIAA1804	84451	714	CGI	TRUE	FALSE	FALSE
cg25149396	chr1	184943512	184943513	FAM129A	116496	168	CGI	TRUE	FALSE	FALSE
cg25191850	chr1	233749633	233749634	KCNK1	3775	-115	CGI	TRUE	FALSE	FALSE
cg25198049	chr1	151509723	151509724	TUFT1	7286	-3056	CGI-N-Shelf	FALSE	TRUE	FALSE
cg25201881	chr1	114695527	114695528	SYT6	148281	943	CGI	TRUE	TRUE	FALSE
cg25203031	chr1	66999813	66999814	SGIP1	84251	-10	CGI-S-Shore	TRUE	FALSE	FALSE
cg25204440	chr1	209979598	209979599	IRF6	3664	-77	CGI	TRUE	FALSE	FALSE
cg25215298	chr1	860022	860023	SAMD11	148398	-506	CGI	TRUE	FALSE	FALSE
cg25221196	chr1	2387967	2387968	PLCH2	9651	-19785	CGI	FALSE	FALSE	TRUE
cg25286333	chr1	6269448	6269449	RNF207	388591	3258	CGI	FALSE	TRUE	FALSE
cg25288420	chr1	78511713	78511714	GIPC2	54810	123	CGI	TRUE	FALSE	FALSE
cg25340966	chr1	119532195	119532196	TBX15	6913	-15	CGI	TRUE	FALSE	FALSE
cg25346059	chr1	154599894	154599895	ADAR	103	560	CGI	FALSE	TRUE	FALSE
cg25370592	chr1	6454097	6454098	ACOT7	11332	-270	CGI	TRUE	FALSE	FALSE
cg25408237	chr1	9656984	9656985	TMEM201	199953	8051	Non-CGI	TRUE	TRUE	FALSE
cg25408271	chr1	91486822	91486823	ZNF644	84146	988	CGI-N-Shore	FALSE	TRUE	FALSE
cg25410842	chr1	150521647	150521648	ADAMTSL4	54507	-249	CGI	TRUE	FALSE	FALSE
cg25552937	chr1	4842472	4842473	AJAP1	55966	127366	CGI-N-Shore	FALSE	TRUE	FALSE
cg25594899	chr1	1182226	1182227	FAM132A	388581	-123	CGI	TRUE	FALSE	FALSE
cg25622154	chr1	228657536	228657537	MIR4666A	100616308	7760	CGI	FALSE	FALSE	TRUE
cg25723050	chr1	224804222	224804223	CNIH3	149111	42	CGI	TRUE	FALSE	FALSE
cg25729922	chr1	20834612	20834613	MUL1	79594	60	CGI	TRUE	FALSE	FALSE
cg25755804	chr1	111813307	111813308	CHIAP2	149620	-9837	CGI-N-Shore	FALSE	FALSE	TRUE
cg25756066	chr1	85931083	85931084	DDAH1	23576	112961	CGI	TRUE	TRUE	FALSE
cg25758134	chr1	100503766	100503767	HIAT1	64645	-21	CGI	TRUE	FALSE	FALSE
cg25851313	chr1	16400665	16400666	FAM131C	348487	-537	CGI-S-Shore	TRUE	FALSE	FALSE
cg25947945	chr1	201368946	201368947	LAD1	3898	-276	CGI	TRUE	FALSE	FALSE
cg25973293	chr1	1061647	1061648	C1orf159	54991	-9910	CGI	FALSE	FALSE	TRUE
cg25975165	chr1	2444426	2444427	PANK4	55229	13607	CGI	FALSE	TRUE	FALSE
cg25980388	chr1	5870397	5870398	MIR4689	100616421	52402	Non-CGI	FALSE	FALSE	TRUE
cg26003818	chr1	231474059	231474060	SPRTN	83932	376	CGI	TRUE	FALSE	FALSE
cg26011771	chr1	32671304	32671305	IQCC	55721	67	CGI	TRUE	FALSE	FALSE
cg26030770	chr1	36912487	36912488	OSCP1	127700	3597	CGI-N-Shelf	FALSE	TRUE	FALSE
cg26034375	chr1	31907354	31907355	SERINC2	347735	24941	Non-CGI	FALSE	TRUE	FALSE
cg26044038	chr1	113261488	113261489	FAM19A3	284467	-1699	CGI-N-Shore	TRUE	FALSE	FALSE
cg26047066	chr1	221069136	221069137	HLX	3142	16392	CGI	FALSE	FALSE	TRUE
cg26052730	chr1	248020331	248020332	TRIM58	25893	-168	CGI-N-Shore	TRUE	FALSE	FALSE
cg26164879	chr1	38599626	38599627	MIR3659	100500801	44722	CGI-N-Shore	FALSE	FALSE	TRUE
cg26218412	chr1	220921611	220921612	MARC2	54996	-63	CGI	TRUE	FALSE	FALSE
cg26220673	chr1	221064700	221064701	HLX	3142	11956	CGI	FALSE	FALSE	TRUE
cg26222311	chr1	976227	976228	AGRN	375790	20723	CGI	FALSE	TRUE	FALSE
cg26225694	chr1	180205253	180205254	LHX4	89884	5819	CGI	FALSE	TRUE	FALSE
cg26251123	chr1	145472579	145472580	ANKRD34A	284615	2070	CGI	TRUE	TRUE	FALSE
cg26252027	chr1	2012218	2012219	PRKCZ	5590	30308	CGI	FALSE	TRUE	FALSE
cg26262605	chr1	93427691	93427692	FAM69A	388650	-611	CGI	TRUE	FALSE	FALSE
cg26303165	chr1	228401758	228401759	OBSCN	84033	5896	CGI	TRUE	TRUE	FALSE
cg26308425	chr1	29508658	29508659	SRSF4	6429	-20	CGI	TRUE	FALSE	FALSE
cg26336773	chr1	175014805	175014806	TNN	63923	-22187	CGI	FALSE	FALSE	TRUE
cg26418147	chr1	205743515	205743516	RAB7L1	8934	1093	CGI-N-Shore	FALSE	TRUE	FALSE
cg26422458	chr1	79472452	79472453	ELTD1	64123	41	CGI	TRUE	FALSE	FALSE
cg26433208	chr1	41445556	41445557	CTPS1	1503	548	CGI	FALSE	TRUE	FALSE
cg26549034	chr1	150337202	150337203	RPRD2	23248	211	CGI	TRUE	FALSE	FALSE
cg26562638	chr1	226130366	226130367	LEFTY2	7044	-1282	CGI-S-Shelf	TRUE	FALSE	FALSE
cg26606184	chr1	207495047	207495048	CD55	1604	229	CGI	TRUE	FALSE	FALSE
cg26681210	chr1	160040182	160040183	KCNJ10	3766	-130	CGI	TRUE	FALSE	FALSE
cg26783079	chr1	2434058	2434059	PANK4	55229	23975	CGI	FALSE	TRUE	FALSE
cg26816907	chr1	197890812	197890813	LHX9	56956	9176	CGI-S-Shore	FALSE	TRUE	FALSE
cg26820223	chr1	150898727	150898728	SETDB1	9869	-86	CGI	TRUE	FALSE	FALSE
cg26831566	chr1	20693014	20693015	LOC339505	339505	62271	CGI	FALSE	TRUE	FALSE
cg26862690	chr1	46152339	46152340	GPBP1L1	60313	-36	CGI	TRUE	FALSE	FALSE
cg26864230	chr1	47911508	47911509	FOXD2	2306	9818	CGI	FALSE	FALSE	TRUE
cg26875805	chr1	166890429	166890430	TADA1	117143	-44774	CGI	FALSE	TRUE	FALSE
cg26884773	chr1	235256863	235256864	SNORA14B	677802	34387	CGI	FALSE	FALSE	TRUE
cg26886056	chr1	143276895	143276896	LOC100130000	100130000	-410233	CGI	FALSE	FALSE	TRUE
cg26907082	chr1	18971840	18971841	PAX7	5081	14339	CGI	FALSE	TRUE	FALSE
cg26912890	chr1	214724875	214724876	PTPN14	5784	147	CGI	TRUE	FALSE	FALSE
cg26938364	chr1	2985527	2985528	PRDM16	63976	-213	CGI	TRUE	FALSE	FALSE
cg26985289	chr1	9884622	9884623	CLSTN1	22883	-71	CGI	TRUE	FALSE	FALSE
cg27012203	chr1	11865920	11865921	MTHFR	4524	238	CGI	TRUE	TRUE	FALSE
cg27176828	chr1	209848550	209848551	G0S2	50486	-118	CGI	TRUE	FALSE	FALSE
cg27222785	chr1	1008091	1008092	RNF223	401934	1594	CGI-S-Shore	TRUE	TRUE	FALSE
cg27299712	chr1	6550532	6550533	TNFRSF25	8718	-24276	CGI	TRUE	TRUE	FALSE
cg27314669	chr1	156822430	156822431	INSRR	3645	6280	CGI-S-Shelf	FALSE	TRUE	FALSE
cg27332243	chr1	154842767	154842768	KCNN3	3782	-12	CGI-S-Shelf	TRUE	FALSE	FALSE
cg27393126	chr1	75139364	75139365	C1orf173	127254	56	CGI	TRUE	FALSE	FALSE
cg27399414	chr1	9884593	9884594	CLSTN1	22883	-42	CGI	TRUE	FALSE	FALSE
cg27447006	chr1	23763279	23763280	TCEA3	6920	-12017	CGI	TRUE	TRUE	FALSE
cg27508545	chr1	10240017	10240018	KIF1B	23095	-30745	Non-CGI	FALSE	TRUE	FALSE
cg27510182	chr1	58715553	58715554	OMA1	115209	296891	CGI	FALSE	TRUE	FALSE
cg27546066	chr1	228248599	228248600	ARF1	375	-21760	CGI	FALSE	TRUE	FALSE
cg27547283	chr1	156698502	156698503	RRNAD1	51093	238	CGI	TRUE	FALSE	FALSE
cg27549720	chr1	19992167	19992168	HTR6	3362	386	CGI	TRUE	FALSE	FALSE
cg27566521	chr1	9970633	9970634	CTNNBIP1	56998	-316	CGI	TRUE	FALSE	FALSE
cg27571196	chr1	201253259	201253260	PKP1	5317	678	CGI	FALSE	TRUE	FALSE
cg27573593	chr1	9778887	9778888	C1orf200	644997	-64242	CGI-N-Shore	FALSE	TRUE	FALSE
cg27578760	chr1	157490623	157490624	FCRL5	83416	31685	CGI	FALSE	TRUE	FALSE
cg00097146	chr2	45171818	45171819	SIX3	6496	2780	CGI	FALSE	TRUE	FALSE
cg00158539	chr2	1859035	1859036	PXDN	7837	-110743	CGI	FALSE	TRUE	FALSE
cg00164941	chr2	73523056	73523057	EGR4	1961	-2226	CGI-S-Shelf	FALSE	FALSE	TRUE
cg00209038	chr2	48982683	48982684	LHCGR	3973	195	CGI	TRUE	TRUE	FALSE
cg00216693	chr2	131913247	131913248	PLEKHB2	55041	50826	CGI	FALSE	TRUE	FALSE
cg00261688	chr2	190305566	190305567	WDR75	84128	-591	CGI-N-Shore	TRUE	FALSE	FALSE
cg00310375	chr2	85906657	85906658	SFTPB	6439	-10792	Non-CGI	FALSE	FALSE	TRUE
cg00331740	chr2	241513689	241513690	RNPEPL1	57140	5684	CGI-S-Shore	TRUE	TRUE	FALSE
cg00366814	chr2	75061219	75061220	HK2	3099	1436	CGI	TRUE	FALSE	FALSE
cg00590251	chr2	119980583	119980584	STEAP3	55240	-799	CGI-N-Shore	TRUE	FALSE	FALSE
cg00593536	chr2	139538222	139538223	NXPH2	11249	-410	CGI	TRUE	FALSE	FALSE
cg00609296	chr2	3461755	3461756	ADI1	55256	61593	CGI	FALSE	TRUE	FALSE
cg00619126	chr2	105459775	105459776	LOC100506421	100506421	8157	CGI	FALSE	TRUE	FALSE
cg00667937	chr2	168572563	168572564	B3GALT1	8708	-102617	CGI	FALSE	FALSE	TRUE
cg00701946	chr2	54087200	54087201	GPR75	10936	-29	CGI	TRUE	FALSE	FALSE
cg00705280	chr2	219866493	219866494	MIR375	494324	-62	CGI	TRUE	FALSE	FALSE
cg00765765	chr2	150176791	150176792	LYPD6	130574	-9706	CGI-N-Shore	FALSE	FALSE	TRUE
cg00782200	chr2	145280523	145280524	ZEB2-AS1	100303491	-2056	CGI	FALSE	FALSE	TRUE
cg00860808	chr2	171670500	171670501	GAD1	2571	-2698	CGI	FALSE	FALSE	TRUE
cg00872414	chr2	23913322	23913323	ATAD2B	54454	236612	CGI-N-Shore	TRUE	TRUE	FALSE
cg00885843	chr2	131058072	131058073	CCDC115	84317	41848	CGI	FALSE	FALSE	TRUE
cg00900124	chr2	69969033	69969034	ANXA4	307	-92	CGI	TRUE	FALSE	FALSE
cg01020413	chr2	66810487	66810488	MEIS1	4211	147954	CGI-S-Shore	FALSE	FALSE	TRUE
cg01077058	chr2	241083864	241083865	OTOS	150677	-3790	Non-CGI	FALSE	FALSE	TRUE
cg01100175	chr2	149645880	149645881	KIF5C	3800	13087	CGI	FALSE	TRUE	FALSE
cg01102158	chr2	3381484	3381485	TSSC1	7260	167	CGI	TRUE	FALSE	FALSE
cg01114124	chr2	240171748	240171749	MGC16025	85009	-54594	CGI	FALSE	TRUE	FALSE
cg01128642	chr2	19558808	19558809	OSR1	130497	-435	CGI	TRUE	FALSE	FALSE
cg01144148	chr2	24163529	24163530	UBXN2A	165324	13373	CGI	FALSE	TRUE	FALSE
cg01206537	chr2	201171336	201171337	SPATS2L	26010	731	CGI	TRUE	TRUE	FALSE
cg01227744	chr2	20644371	20644372	RHOB	388	-2462	CGI-N-Shore	FALSE	FALSE	TRUE
cg01299579	chr2	10830716	10830717	NOL10	79954	-603	CGI-S-Shore	TRUE	FALSE	FALSE
cg01308931	chr2	120517826	120517827	PTPN4	5775	618	CGI	TRUE	FALSE	FALSE
cg01313518	chr2	25584954	25584955	DNMT3A	1788	-19494	CGI	FALSE	FALSE	TRUE
cg01315092	chr2	120980375	120980376	TMEM185B	79134	607	CGI	TRUE	FALSE	FALSE
cg01400712	chr2	25352206	25352207	POMC	5443	39351	CGI-N-Shelf	FALSE	TRUE	FALSE
cg01403596	chr2	92045973	92045974	GGT8P	645367	82604	CGI	FALSE	FALSE	TRUE
cg01405040	chr2	176964137	176964138	HOXD12	3238	-391	CGI	TRUE	FALSE	FALSE
cg01419831	chr2	162283705	162283706	TBR1	10716	11084	CGI	FALSE	FALSE	TRUE
cg01422370	chr2	73384389	73384390	RAB11FIP5	26056	-44242	CGI	FALSE	FALSE	TRUE
cg01589412	chr2	62133120	62133121	COMMD1	150684	316	CGI	FALSE	TRUE	FALSE
cg01598371	chr2	37423428	37423429	LOC100505876	100505876	-205	CGI-N-Shore	TRUE	TRUE	FALSE
cg01613965	chr2	91848124	91848125	LOC654342	654342	-148	CGI	TRUE	FALSE	FALSE
cg01614598	chr2	38152364	38152365	RMDN2	151393	-96	CGI	TRUE	FALSE	FALSE
cg01660407	chr2	101008576	101008577	CHST10	9486	25552	CGI-N-Shore	FALSE	TRUE	FALSE
cg01708273	chr2	176974060	176974061	HOXD11	3237	4809	CGI	FALSE	TRUE	FALSE
cg01724041	chr2	208393966	208393967	CREB1	1385	-648	CGI-N-Shore	TRUE	FALSE	FALSE
cg01725586	chr2	131513735	131513736	AMER3	205147	657	CGI	TRUE	TRUE	FALSE
cg01726823	chr2	65454860	65454861	ACTR2	10097	30	CGI	TRUE	FALSE	FALSE
cg01741999	chr2	219137824	219137825	PNKD	25953	2708	CGI-S-Shelf	FALSE	TRUE	FALSE
cg01744130	chr2	86667850	86667851	KDM3A	55818	-419	CGI-N-Shore	TRUE	FALSE	FALSE
cg01789478	chr2	182545485	182545486	NEUROD1	4760	-92	CGI	TRUE	FALSE	FALSE
cg01821656	chr2	2190118	2190119	LOC730811	730811	-132884	CGI	FALSE	TRUE	FALSE
cg01879591	chr2	242954430	242954431	LOC728323	728323	-76412	CGI	FALSE	FALSE	TRUE
cg01971203	chr2	183473411	183473412	PDE1A	5136	-85903	CGI	FALSE	FALSE	TRUE
cg02089380	chr2	158732891	158732892	ACVR1	90	-516	CGI	TRUE	FALSE	FALSE
cg02093176	chr2	3660939	3660940	COLEC11	78989	18301	CGI-S-Shore	FALSE	TRUE	FALSE
cg02111748	chr2	43903650	43903651	LOC728819	728819	-188	CGI	TRUE	TRUE	FALSE
cg02149880	chr2	216878419	216878420	MREG	55686	-72	CGI	TRUE	TRUE	FALSE
cg02160608	chr2	113956634	113956635	PSD4	23550	25073	CGI	TRUE	TRUE	FALSE
cg02178630	chr2	218678534	218678535	DIRC3	729582	-57217	Non-CGI	TRUE	TRUE	FALSE
cg02208776	chr2	198365119	198365120	HSPD1	3329	-120	CGI	TRUE	FALSE	FALSE
cg02324737	chr2	172543905	172543906	DYNC1I2	1781	-75	CGI	TRUE	FALSE	FALSE
cg02343254	chr2	3583963	3583964	RNASEH1	246243	21975	Non-CGI	FALSE	FALSE	TRUE
cg02343720	chr2	241516354	241516355	RNPEPL1	57140	8349	CGI-S-Shelf	FALSE	TRUE	FALSE
cg02467646	chr2	27546052	27546053	MPV17	4358	2493	CGI	TRUE	TRUE	FALSE
cg02513202	chr2	150970076	150970077	RND3	390	374131	Non-CGI	FALSE	FALSE	TRUE
cg02657760	chr2	219157083	219157084	TMBIM1	64114	195	CGI	FALSE	TRUE	FALSE
cg02694427	chr2	176964512	176964513	HOXD12	3238	-16	CGI	TRUE	FALSE	FALSE
cg02763032	chr2	74425761	74425762	MTHFD2	10797	70	CGI	TRUE	FALSE	FALSE
cg02773086	chr2	177027440	177027441	HOXD3	3232	-1363	CGI	TRUE	FALSE	FALSE
cg02785604	chr2	131676136	131676137	ARHGEF4	50649	3349	CGI-S-Shore	FALSE	TRUE	FALSE
cg02828023	chr2	107503834	107503835	ST6GAL2	84620	-270	CGI	TRUE	FALSE	FALSE
cg02861056	chr2	68592345	68592346	PLEK	5341	22	Non-CGI	TRUE	FALSE	FALSE
cg02929766	chr2	131100454	131100455	IMP4	92856	-33	CGI	TRUE	FALSE	FALSE
cg02938936	chr2	3718203	3718204	ALLC	55821	12416	CGI-S-Shelf	FALSE	TRUE	FALSE
cg03035921	chr2	122407209	122407210	LOC254128	254128	-19	CGI	TRUE	FALSE	FALSE
cg03042666	chr2	240014781	240014782	MIR4441	100616493	-7158	CGI-N-Shore	FALSE	TRUE	FALSE
cg03074424	chr2	183989067	183989068	NUP35	129401	4316	CGI	TRUE	TRUE	FALSE
cg03075561	chr2	201936709	201936710	NDUFB3	4709	246	CGI	TRUE	FALSE	FALSE
cg03128101	chr2	74405376	74405377	MOB1A	55233	617	CGI	FALSE	TRUE	FALSE
cg03129884	chr2	95692727	95692728	MAL	4118	1247	CGI	FALSE	TRUE	FALSE
cg03170725	chr2	27498214	27498215	SLC30A3	7781	-25	CGI-N-Shore	TRUE	FALSE	FALSE
cg03175635	chr2	203736521	203736522	ICA1L	130026	-149	CGI	TRUE	FALSE	FALSE
cg03181248	chr2	175199670	175199671	SP9	100131390	-149	CGI	TRUE	FALSE	FALSE
cg03203239	chr2	74735315	74735316	PCGF1	84759	-493	CGI	TRUE	FALSE	FALSE
cg03205007	chr2	55845736	55845737	SMEK2	57223	-622	CGI	TRUE	FALSE	FALSE
cg03257743	chr2	11123616	11123617	KCNF1	3754	71552	Non-CGI	FALSE	FALSE	TRUE
cg03263168	chr2	158732716	158732717	ACVR1	90	-341	CGI	TRUE	FALSE	FALSE
cg03279522	chr2	236773146	236773147	GBX2	2637	303504	CGI	FALSE	TRUE	FALSE
cg03304664	chr2	151282496	151282497	RND3	390	61711	Non-CGI	FALSE	FALSE	TRUE
cg03307465	chr2	40679519	40679520	SLC8A1	6546	60054	CGI	TRUE	TRUE	FALSE
cg03309786	chr2	232574968	232574969	PTMA	5757	1732	CGI	TRUE	TRUE	FALSE
cg03326215	chr2	2328391	2328392	LOC730811	730811	5386	Non-CGI	FALSE	TRUE	FALSE
cg03438674	chr2	241372300	241372301	GPC1	2817	-2813	CGI-N-Shelf	FALSE	FALSE	TRUE
cg03445663	chr2	242170236	242170237	ANO7	50636	42311	CGI-S-Shore	FALSE	TRUE	FALSE
cg03450948	chr2	177053274	177053275	HOXD1	3231	-31	CGI	TRUE	TRUE	FALSE
cg03531247	chr2	50573485	50573486	NRXN1	9378	686187	CGI-N-Shore	FALSE	TRUE	FALSE
cg03538480	chr2	8785262	8785263	ID2	3398	-36849	CGI	FALSE	FALSE	TRUE
cg03645581	chr2	27440176	27440177	CAD	790	-80	CGI	TRUE	FALSE	FALSE
cg03674127	chr2	71693870	71693871	DYSF	8291	13116	CGI	TRUE	TRUE	FALSE
cg03717315	chr2	74881780	74881781	SEMA4F	10505	386	CGI	FALSE	TRUE	FALSE
cg03753681	chr2	20866500	20866501	GDF7	151449	75	CGI	TRUE	FALSE	FALSE
cg03754165	chr2	60780427	60780428	BCL11A	53335	204	CGI-S-Shore	TRUE	FALSE	FALSE
cg03801179	chr2	20212423	20212424	MATN3	4148	30	CGI	TRUE	FALSE	FALSE
cg03803336	chr2	32582034	32582035	BIRC6	57448	-60	CGI	TRUE	FALSE	FALSE
cg03817939	chr2	75788231	75788232	EVA1A	84141	8615	CGI	TRUE	TRUE	FALSE
cg03964958	chr2	176964720	176964721	HOXD12	3238	189	CGI	TRUE	FALSE	FALSE
cg03997167	chr2	2829723	2829724	MYT1L	23040	-494677	Non-CGI	FALSE	FALSE	TRUE
cg04011897	chr2	240014762	240014763	MIR4441	100616493	-7139	CGI-N-Shore	FALSE	TRUE	FALSE
cg04020079	chr2	68546688	68546689	CNRIP1	25927	493	CGI	TRUE	TRUE	FALSE
cg04060001	chr2	207024261	207024262	NDUFS1	4719	-17	CGI	TRUE	FALSE	FALSE
cg04076766	chr2	71212157	71212158	ANKRD53	79998	6581	CGI	FALSE	TRUE	FALSE
cg04092513	chr2	200819919	200819920	C2orf47	79568	-119	CGI	TRUE	TRUE	FALSE
cg04194947	chr2	177012191	177012192	MIR10B	406903	-2838	CGI	FALSE	FALSE	TRUE
cg04201253	chr2	177022517	177022518	HOXD3	3232	-6286	CGI	FALSE	FALSE	TRUE
cg04202122	chr2	29116540	29116541	WDR43	23160	-991	CGI-N-Shore	TRUE	FALSE	FALSE
cg04220104	chr2	179387853	179387854	TTN-AS1	100506866	298	CGI	TRUE	TRUE	FALSE
cg04415176	chr2	176957842	176957843	HOXD13	3239	309	CGI	TRUE	FALSE	FALSE
cg04458869	chr2	169312687	169312688	CERS6	253782	-146	CGI	TRUE	FALSE	FALSE
cg04532229	chr2	103235411	103235412	SLC9A2	6549	-753	CGI	TRUE	FALSE	FALSE
cg04547220	chr2	84743558	84743559	DNAH6	1768	-19	CGI	TRUE	FALSE	FALSE
cg04647948	chr2	206950423	206950424	INO80D	54891	481	CGI	TRUE	TRUE	FALSE
cg04864807	chr2	121412139	121412140	GLI2	2736	-81058	CGI	FALSE	FALSE	TRUE
cg04869568	chr2	602153	602154	TMEM18	129787	75284	CGI	FALSE	FALSE	TRUE
cg04881214	chr2	44395864	44395865	PPM1B	5495	-134	CGI	TRUE	FALSE	FALSE
cg04937609	chr2	23852064	23852065	KLHL29	114818	243765	CGI	FALSE	TRUE	FALSE
cg04942334	chr2	235405480	235405481	ARL4C	10123	211	CGI	TRUE	FALSE	FALSE
cg04947065	chr2	3606037	3606038	LOC100506054	100506054	60	CGI	TRUE	FALSE	FALSE
cg05059031	chr2	99061275	99061276	INPP4A	3631	-44	CGI	TRUE	FALSE	FALSE
cg05099387	chr2	177053292	177053293	HOXD1	3231	-13	CGI	TRUE	TRUE	FALSE
cg05168033	chr2	56150942	56150943	EFEMP1	2202	354	CGI	TRUE	FALSE	FALSE
cg05224659	chr2	43295595	43295596	ZFP36L2	678	158148	CGI	FALSE	FALSE	TRUE
cg05225012	chr2	96055346	96055347	FAHD2A	51011	-13100	CGI	FALSE	FALSE	TRUE
cg05228485	chr2	242089741	242089742	PASK	23178	-346	CGI	TRUE	TRUE	FALSE
cg05350188	chr2	26785353	26785354	C2orf70	339778	-126	CGI	TRUE	FALSE	FALSE
cg05359249	chr2	220406470	220406471	TMEM198	130612	-1913	CGI	TRUE	TRUE	FALSE
cg05361673	chr2	235962928	235962929	SH3BP4	23677	102299	CGI-S-Shore	FALSE	TRUE	FALSE
cg05371711	chr2	241506007	241506008	RNPEPL1	57140	-1995	CGI	TRUE	FALSE	FALSE
cg05514256	chr2	45231891	45231892	SIX2	10736	4649	CGI	FALSE	FALSE	TRUE
cg05633391	chr2	11052558	11052559	KCNF1	3754	494	CGI	TRUE	FALSE	FALSE
cg05655534	chr2	62798448	62798449	TMEM17	200728	-35667	CGI	FALSE	FALSE	TRUE
cg05687686	chr2	180726697	180726698	ZNF385B	151126	-464	CGI	TRUE	FALSE	FALSE
cg05714155	chr2	172974735	172974736	DLX2	1746	-7256	CGI	FALSE	FALSE	TRUE
cg05845831	chr2	232476255	232476256	C2orf57	165100	18679	CGI-N-Shelf	FALSE	FALSE	TRUE
cg05864326	chr2	177030150	177030151	HOXD3	3232	1344	CGI	FALSE	TRUE	FALSE
cg05868531	chr2	232348602	232348603	NCL	4691	-19396	CGI	FALSE	FALSE	TRUE
cg05880944	chr2	242616965	242616966	DTYMK	1841	9416	CGI	TRUE	TRUE	FALSE
cg05885936	chr2	132088912	132088913	WTH3DI	150786	32817	CGI	FALSE	TRUE	FALSE
cg05903289	chr2	130345205	130345206	LOC389033	389033	346683	CGI	FALSE	FALSE	TRUE
cg05904194	chr2	85132663	85132664	TMSB10	9168	-98	CGI	TRUE	FALSE	FALSE
cg05995360	chr2	236044874	236044875	SH3BP4	23677	184245	CGI	FALSE	FALSE	TRUE
cg06003267	chr2	583872	583873	TMEM18	129787	93565	CGI	FALSE	FALSE	TRUE
cg06094323	chr2	128145662	128145663	PROC	5624	-30332	CGI	FALSE	FALSE	TRUE
cg06119201	chr2	116152853	116152854	LOC389023	389023	-233932	Non-CGI	FALSE	TRUE	FALSE
cg06127335	chr2	242011247	242011248	MTERFD2	130916	30498	CGI	FALSE	TRUE	FALSE
cg06201514	chr2	1817409	1817410	PXDN	7837	-69117	CGI	FALSE	TRUE	FALSE
cg06216650	chr2	558183	558184	TMEM18	129787	119254	CGI	FALSE	FALSE	TRUE
cg06287431	chr2	26205517	26205518	KIF3C	3797	-73	CGI	TRUE	FALSE	FALSE
cg06360703	chr2	169482790	169482791	MIR4774	100616356	43336	Non-CGI	FALSE	TRUE	FALSE
cg06373804	chr2	242888333	242888334	CXXC11	285093	76446	CGI	FALSE	FALSE	TRUE
cg06478094	chr2	47630251	47630252	MSH2	4436	44	CGI	TRUE	FALSE	FALSE
cg06530490	chr2	118981783	118981784	INSIG2	51141	135732	CGI	FALSE	FALSE	TRUE
cg06538660	chr2	202645935	202645936	ALS2	57679	-39	CGI	TRUE	FALSE	FALSE
cg06554749	chr2	238384406	238384407	MLPH	79083	-10645	CGI	FALSE	FALSE	TRUE
cg06616775	chr2	202316682	202316683	STRADB	55437	289	CGI	TRUE	TRUE	FALSE
cg06638795	chr2	42719933	42719934	KCNG3	170850	1302	CGI	TRUE	TRUE	FALSE
cg06638913	chr2	235883680	235883681	SH3BP4	23677	23051	CGI	FALSE	TRUE	FALSE
cg06642617	chr2	73461528	73461529	CCT7	10574	163	CGI	TRUE	TRUE	FALSE
cg06674731	chr2	154335014	154335015	RPRM	56475	306	CGI	TRUE	FALSE	FALSE
cg06704122	chr2	119604702	119604703	EN1	2019	1055	CGI	TRUE	FALSE	FALSE
cg06716968	chr2	11864461	11864462	LPIN1	23175	46739	Non-CGI	TRUE	TRUE	FALSE
cg06825448	chr2	240884925	240884926	MIR4786	100616417	-2413	CGI	FALSE	FALSE	TRUE
cg06848802	chr2	75275958	75275959	POLE4	56655	90182	Non-CGI	FALSE	TRUE	FALSE
cg06852824	chr2	231582109	231582110	CAB39	51719	4551	CGI-S-Shelf	FALSE	TRUE	FALSE
cg06898946	chr2	73172128	73172129	EMX1	2016	27523	Non-CGI	FALSE	TRUE	FALSE
cg06900899	chr2	241393833	241393834	MIR149	406941	-1583	CGI	TRUE	TRUE	FALSE
cg06906472	chr2	107502801	107502802	ST6GAL2	84620	760	CGI	TRUE	TRUE	FALSE
cg06913508	chr2	207630136	207630137	FASTKD2	22868	23	CGI	TRUE	FALSE	FALSE
cg07025650	chr2	54710513	54710514	SPTBN1	6711	27058	CGI-N-Shore	FALSE	TRUE	FALSE
cg07049977	chr2	37458536	37458537	CEBPZ	10153	202	CGI	TRUE	TRUE	FALSE
cg07078979	chr2	34128696	34128697	MYADML	151325	-175411	CGI	FALSE	FALSE	TRUE
cg07106432	chr2	27593462	27593463	SNX17	9784	98	CGI	TRUE	FALSE	FALSE
cg07158434	chr2	232571157	232571158	PTMA	5757	-2076	CGI	TRUE	FALSE	FALSE
cg07161827	chr2	71680559	71680560	DYSF	8291	-192	CGI-N-Shore	TRUE	FALSE	FALSE
cg07177569	chr2	187454747	187454748	ITGAV	3685	-41	CGI	TRUE	FALSE	FALSE
cg07186154	chr2	108603244	108603245	SLC5A7	60482	248	CGI	FALSE	TRUE	FALSE
cg07211384	chr2	86668246	86668247	KDM3A	55818	-23	CGI	TRUE	FALSE	FALSE
cg07212778	chr2	119916510	119916511	C1QL2	165257	-38	CGI	TRUE	FALSE	FALSE
cg07258910	chr2	72079276	72079277	CYP26B1	56603	295685	CGI-N-Shore	FALSE	FALSE	TRUE
cg07323141	chr2	239140169	239140170	LOC151174	151174	147	CGI	TRUE	FALSE	FALSE
cg07417218	chr2	242255421	242255422	HDLBP	3069	-305	CGI	TRUE	TRUE	FALSE
cg07428089	chr2	176046170	176046171	ATP5G3	518	318	CGI	TRUE	TRUE	FALSE
cg07467448	chr2	96068411	96068412	FAHD2A	51011	-35	CGI	TRUE	FALSE	FALSE
cg07532089	chr2	71018354	71018355	FIGLA	344018	-578	CGI-S-Shore	TRUE	FALSE	FALSE
cg07536910	chr2	176948105	176948106	EVX2	344191	583	CGI	TRUE	FALSE	FALSE
cg07537917	chr2	241836409	241836410	C2orf54	79919	-835	CGI-S-Shore	TRUE	FALSE	FALSE
cg07561442	chr2	24163383	24163384	UBXN2A	165324	13227	CGI	TRUE	TRUE	FALSE
cg07582400	chr2	239010679	239010680	ESPNL	339768	1727	CGI-S-Shore	FALSE	TRUE	FALSE
cg07585513	chr2	212389424	212389425	MIR548F2	100313771	901658	CGI-S-Shore	FALSE	TRUE	FALSE
cg07594247	chr2	113993304	113993305	LOC654433	654433	196	CGI	TRUE	TRUE	FALSE
cg07620889	chr2	227700566	227700567	RHBDD1	84236	-103	CGI	TRUE	FALSE	FALSE
cg07654559	chr2	74710618	74710619	CCDC142	84865	-260	CGI	TRUE	TRUE	FALSE
cg07690287	chr2	185998337	185998338	ZNF804A	91752	535243	CGI-S-Shore	FALSE	FALSE	TRUE
cg07722359	chr2	239318105	239318106	ASB1	51665	-17519	CGI-N-Shore	FALSE	FALSE	TRUE
cg07772170	chr2	220480954	220480955	SLC4A3	6508	-11336	Non-CGI	FALSE	TRUE	FALSE
cg07772999	chr2	113993052	113993053	LOC654433	654433	-53	CGI	TRUE	TRUE	FALSE
cg07791671	chr2	242255336	242255337	HDLBP	3069	-220	CGI	TRUE	TRUE	FALSE
cg07867558	chr2	219524465	219524466	BCS1L	617	85	CGI	TRUE	FALSE	FALSE
cg07901206	chr2	129250690	129250691	HS6ST1	9394	-174518	CGI	FALSE	FALSE	TRUE
cg07939836	chr2	176949533	176949534	EVX2	344191	-842	CGI	TRUE	FALSE	FALSE
cg07949777	chr2	128388876	128388877	GPR17	2840	-14561	Non-CGI	FALSE	TRUE	FALSE
cg08012278	chr2	237068350	237068351	GBX2	2637	8300	CGI	FALSE	FALSE	TRUE
cg08025512	chr2	220110385	220110386	STK16	8576	192	CGI	TRUE	TRUE	FALSE
cg08026651	chr2	84743142	84743143	DNAH6	1768	-435	CGI-N-Shore	TRUE	FALSE	FALSE
cg08045488	chr2	241076526	241076527	MYEOV2	150678	-761	CGI	TRUE	FALSE	FALSE
cg08077337	chr2	202900063	202900064	FZD7	8324	752	CGI	TRUE	FALSE	FALSE
cg08084860	chr2	237080340	237080341	GBX2	2637	-3687	CGI	FALSE	FALSE	TRUE
cg08085232	chr2	65598271	65598272	SPRED2	200734	61383	Non-CGI	FALSE	TRUE	FALSE
cg08135327	chr2	134877962	134877963	MIR3679	100500878	-6732	CGI	FALSE	FALSE	TRUE
cg08146621	chr2	158453928	158453929	ACVR1C	130399	31469	CGI	TRUE	TRUE	FALSE
cg08213337	chr2	178937673	178937674	PDE11A	50940	35391	CGI	TRUE	TRUE	FALSE
cg08235500	chr2	26467844	26467845	HADHB	3032	227	CGI	TRUE	FALSE	FALSE
cg08266974	chr2	10567273	10567274	SNORA80B	100302743	19700	CGI	FALSE	TRUE	FALSE
cg08279055	chr2	46707678	46707679	TMEM247	388946	973	CGI-N-Shore	FALSE	TRUE	FALSE
cg08385249	chr2	128433373	128433374	LIMS2	55679	5985	CGI	TRUE	TRUE	FALSE
cg08569786	chr2	23616768	23616769	KLHL29	114818	8469	Non-CGI	FALSE	TRUE	FALSE
cg08625192	chr2	242997938	242997939	LOC728323	728323	-32904	CGI	FALSE	FALSE	TRUE
cg08690859	chr2	200333729	200333730	SATB2-AS1	150538	907	CGI	TRUE	TRUE	FALSE
cg08699640	chr2	240061327	240061328	MIR4441	100616493	-53704	CGI	FALSE	TRUE	FALSE
cg08700893	chr2	875896	875897	LOC339822	339822	-11783	CGI	FALSE	FALSE	TRUE
cg08750504	chr2	172946193	172946194	DLX1	1745	-4013	CGI	FALSE	FALSE	TRUE
cg08761102	chr2	38303844	38303845	CYP1B1	1545	-520	CGI-S-Shore	TRUE	FALSE	FALSE
cg08786077	chr2	37571732	37571733	QPCT	25797	-19	CGI	TRUE	FALSE	FALSE
cg08786481	chr2	38830091	38830092	HNRPLL	92906	85	CGI	TRUE	FALSE	FALSE
cg08800878	chr2	73152809	73152810	EMX1	2016	8204	CGI	FALSE	TRUE	FALSE
cg08862564	chr2	208395069	208395070	CREB1	1385	452	CGI	FALSE	TRUE	FALSE
cg08871052	chr2	42274619	42274620	PKDCC	91461	-540	CGI	TRUE	FALSE	FALSE
cg08940762	chr2	233415810	233415811	EIF4E2	9470	452	CGI	TRUE	TRUE	FALSE
cg08979281	chr2	239999829	239999830	MIR4441	100616493	7791	CGI	FALSE	TRUE	FALSE
cg09001939	chr2	11810534	11810535	NTSR2	23620	-204	CGI	TRUE	FALSE	FALSE
cg09119654	chr2	61293073	61293074	KIAA1841	84542	66	CGI	TRUE	FALSE	FALSE
cg09132607	chr2	43903582	43903583	LOC728819	728819	-120	CGI	TRUE	TRUE	FALSE
cg09235217	chr2	232263030	232263031	B3GNT7	93010	2694	CGI	FALSE	TRUE	FALSE
cg09235936	chr2	242170211	242170212	ANO7	50636	42286	CGI-S-Shore	FALSE	TRUE	FALSE
cg09249637	chr2	11314846	11314847	PQLC3	130814	19305	Non-CGI	FALSE	TRUE	FALSE
cg09253914	chr2	37311580	37311581	GPATCH11	253635	-12	CGI	TRUE	FALSE	FALSE
cg09279240	chr2	180726252	180726253	ZNF385B	151126	-19	CGI	TRUE	FALSE	FALSE
cg09305577	chr2	96874663	96874664	STARD7	56910	-89	CGI	TRUE	FALSE	FALSE
cg09323727	chr2	176936436	176936437	EVX2	344191	12252	CGI	FALSE	FALSE	TRUE
cg09333532	chr2	61764274	61764275	XPO1	7514	1142	CGI	TRUE	TRUE	FALSE
cg09336899	chr2	233766002	233766003	C2orf82	389084	31007	CGI	FALSE	TRUE	FALSE
cg09351254	chr2	242088885	242088886	PPP1R7	5510	-137	CGI	TRUE	TRUE	FALSE
cg09410607	chr2	217237040	217237041	MARCH4	57574	-289	CGI	TRUE	FALSE	FALSE
cg09426834	chr2	946648	946649	SNTG2	54221	93	CGI	TRUE	FALSE	FALSE
cg09438147	chr2	210636533	210636534	UNC80	285175	-182	CGI	TRUE	FALSE	FALSE
cg09456297	chr2	38304066	38304067	CYP1B1	1545	-742	CGI	TRUE	FALSE	FALSE
cg09484039	chr2	183731310	183731311	FRZB	2487	186	CGI	TRUE	FALSE	FALSE
cg09557766	chr2	239847650	239847651	FLJ43879	401039	313	Non-CGI	FALSE	TRUE	FALSE
cg09563922	chr2	121200209	121200210	LOC84931	84931	23714	CGI-S-Shore	FALSE	FALSE	TRUE
cg09580478	chr2	16689509	16689510	FAM49A	81553	157623	CGI	FALSE	FALSE	TRUE
cg09590377	chr2	8597389	8597390	LINC00299	339789	-128839	CGI	FALSE	FALSE	TRUE
cg09717809	chr2	74375930	74375931	BOLA3-AS1	100507171	821	CGI-S-Shore	TRUE	TRUE	FALSE
cg09761959	chr2	2754829	2754830	MYT1L	23040	-419783	CGI	FALSE	FALSE	TRUE
cg09840623	chr2	42396402	42396403	EML4	27436	-86	CGI	TRUE	FALSE	FALSE
cg09987596	chr2	131513705	131513706	AMER3	205147	627	CGI	TRUE	TRUE	FALSE
cg09997497	chr2	183902928	183902929	NCKAP1	10787	299	CGI	TRUE	FALSE	FALSE
cg10042319	chr2	232394971	232394972	NMUR1	10316	209	CGI	FALSE	TRUE	FALSE
cg10076508	chr2	135672394	135672395	LOC100129961	100129961	3780	CGI-N-Shelf	FALSE	TRUE	FALSE
cg10122865	chr2	63284132	63284133	OTX1	5013	6939	CGI	FALSE	TRUE	FALSE
cg10159630	chr2	177037364	177037365	HOXD3	3232	8558	CGI	FALSE	TRUE	FALSE
cg10168149	chr2	200335558	200335559	SATB2	23314	429	CGI	TRUE	TRUE	FALSE
cg10239991	chr2	240046227	240046228	MIR4441	100616493	-38604	CGI	FALSE	TRUE	FALSE
cg10258395	chr2	240026647	240026648	MIR4441	100616493	-19024	CGI-N-Shelf	FALSE	TRUE	FALSE
cg10328259	chr2	3321226	3321227	TSSC1	7260	60425	CGI	FALSE	TRUE	FALSE
cg10365657	chr2	85051143	85051144	TRABD2A	129293	57107	Non-CGI	FALSE	TRUE	FALSE
cg10429608	chr2	238864632	238864633	UBE2F-SCLY	100533179	-10953	CGI	FALSE	FALSE	TRUE
cg10523140	chr2	101768941	101768942	TBC1D8	11138	-1094	CGI-S-Shore	TRUE	FALSE	FALSE
cg10534439	chr2	69969029	69969030	ANXA4	307	-96	CGI	TRUE	FALSE	FALSE
cg10557743	chr2	99552633	99552634	KIAA1211L	343990	49	CGI	TRUE	FALSE	FALSE
cg10582499	chr2	232675501	232675502	COPS7B	64708	29055	Non-CGI	FALSE	FALSE	TRUE
cg10773869	chr2	70057052	70057053	GMCL1	64395	233	CGI	TRUE	FALSE	FALSE
cg10803714	chr2	69399575	69399576	MIR3126	100423030	68760	Non-CGI	FALSE	TRUE	FALSE
cg10820693	chr2	237994591	237994592	COPS8	10920	506	CGI	TRUE	FALSE	FALSE
cg10825617	chr2	236659069	236659070	AGAP1	116987	256335	Non-CGI	FALSE	TRUE	FALSE
cg10846328	chr2	127818131	127818132	BIN1	274	46770	CGI	FALSE	TRUE	FALSE
cg10848792	chr2	62732892	62732893	TMEM17	200728	29886	CGI	FALSE	TRUE	FALSE
cg10900202	chr2	131674361	131674362	ARHGEF4	50649	1574	CGI	TRUE	FALSE	FALSE
cg10908460	chr2	176950736	176950737	EVX2	344191	-2045	CGI	FALSE	FALSE	TRUE
cg10954469	chr2	71115370	71115371	VAX2	25806	-12348	CGI	FALSE	FALSE	TRUE
cg10981275	chr2	3381760	3381761	TSSC1	7260	-106	CGI	TRUE	FALSE	FALSE
cg10992590	chr2	130940487	130940488	SMPD4	55627	-163	CGI-S-Shore	TRUE	TRUE	FALSE
cg10996058	chr2	119915729	119915730	C1QL2	165257	740	CGI	TRUE	FALSE	FALSE
cg11041835	chr2	189156425	189156426	GULP1	51454	28	CGI	TRUE	FALSE	FALSE
cg11115502	chr2	24299379	24299380	SF3B14	51639	-64	CGI	TRUE	FALSE	FALSE
cg11125589	chr2	74153979	74153980	DGUOK	1716	25	CGI	TRUE	FALSE	FALSE
cg11236515	chr2	74213762	74213763	TET3	200424	-59686	CGI-S-Shore	FALSE	FALSE	TRUE
cg11274314	chr2	242480504	242480505	BOK	666	-17640	CGI	FALSE	FALSE	TRUE
cg11277143	chr2	10334372	10334373	MIR4261	100422929	-1574	Non-CGI	TRUE	TRUE	FALSE
cg11284316	chr2	210636398	210636399	UNC80	285175	-317	CGI	TRUE	FALSE	FALSE
cg11284414	chr2	232573146	232573147	PTMA	5757	-87	CGI	TRUE	FALSE	FALSE
cg11310125	chr2	113239311	113239312	TTL	150465	-430	CGI	TRUE	FALSE	FALSE
cg11348442	chr2	220117784	220117785	TUBA4B	80086	-179	CGI	TRUE	TRUE	FALSE
cg11349715	chr2	54557882	54557883	C2orf73	129852	-187	CGI	TRUE	FALSE	FALSE
cg11350208	chr2	133033202	133033203	ANKRD30BL	554226	-17659	CGI-S-Shelf	FALSE	FALSE	TRUE
cg11380327	chr2	24715213	24715214	NCOA1	8648	-71964	CGI	FALSE	FALSE	TRUE
cg11397369	chr2	231920762	231920763	PSMD1	5707	-814	CGI-N-Shore	TRUE	FALSE	FALSE
cg11418389	chr2	95978534	95978535	KCNIP3	30818	15461	CGI	FALSE	TRUE	FALSE
cg11491749	chr2	39665186	39665187	MAP4K3	8491	-966	CGI	TRUE	TRUE	FALSE
cg11565042	chr2	105858730	105858731	GPR45	11250	529	CGI	TRUE	FALSE	FALSE
cg11642891	chr2	3452563	3452564	TRAPPC12	51112	69116	CGI	FALSE	TRUE	FALSE
cg11669516	chr2	217501092	217501093	IGFBP2	3485	2964	CGI-S-Shore	FALSE	TRUE	FALSE
cg11707035	chr2	240253573	240253574	MIR2467	100616360	19924	CGI	FALSE	TRUE	FALSE
cg11719885	chr2	224903487	224903488	SERPINE2	5270	547	CGI	TRUE	TRUE	FALSE
cg11763394	chr2	113992921	113992922	LOC654433	654433	-184	CGI-N-Shore	TRUE	TRUE	FALSE
cg11788289	chr2	214148976	214148977	LOC100130451	100130451	-46	CGI-N-Shore	TRUE	FALSE	FALSE
cg11794625	chr2	223521104	223521105	FARSB	10056	-276	CGI-S-Shore	TRUE	FALSE	FALSE
cg11826338	chr2	98274951	98274952	ACTR1B	10120	5608	CGI	FALSE	TRUE	FALSE
cg11838463	chr2	219081756	219081757	ARPC2	10109	-116	CGI	TRUE	FALSE	FALSE
cg11946719	chr2	233216220	233216221	ALPP	250	-27126	CGI	FALSE	FALSE	TRUE
cg11989674	chr2	175351902	175351903	GPR155	151556	-90	CGI	TRUE	FALSE	FALSE
cg11990559	chr2	240727278	240727279	LOC150935	150935	42723	CGI-S-Shore	FALSE	FALSE	TRUE
cg12018718	chr2	8684089	8684090	ID2	3398	-138022	CGI-N-Shore	FALSE	FALSE	TRUE
cg12159419	chr2	217277556	217277557	SMARCAL1	50485	418	CGI-S-Shore	TRUE	TRUE	FALSE
cg12161959	chr2	240868337	240868338	MIR4786	100616417	14172	CGI	FALSE	FALSE	TRUE
cg12191096	chr2	74692545	74692546	MOGS	7841	-7	CGI	TRUE	FALSE	FALSE
cg12307638	chr2	233323532	233323533	ALPI	248	2698	CGI	FALSE	TRUE	FALSE
cg12345955	chr2	60781546	60781547	BCL11A	53335	-912	CGI	TRUE	FALSE	FALSE
cg12463851	chr2	237477186	237477187	CXCR7	57007	7761	CGI	TRUE	TRUE	FALSE
cg12518410	chr2	109745812	109745813	SH3RF3	344558	-183	CGI	TRUE	FALSE	FALSE
cg12529868	chr2	61698413	61698414	USP34	9736	-563	CGI	TRUE	FALSE	FALSE
cg12535642	chr2	120020901	120020902	STEAP3	55240	39516	CGI	FALSE	TRUE	FALSE
cg12547218	chr2	240153820	240153821	MGC16025	85009	-36666	CGI-S-Shore	FALSE	TRUE	FALSE
cg12571629	chr2	445430	445431	FAM150B	285016	-157121	CGI	FALSE	FALSE	TRUE
cg12573849	chr2	105470711	105470712	POU3F3	5455	-1256	CGI	TRUE	FALSE	FALSE
cg12637786	chr2	220355222	220355223	GMPPA	29926	-8363	Non-CGI	FALSE	TRUE	FALSE
cg12756150	chr2	241140248	241140249	OTOS	150677	-60174	Non-CGI	FALSE	FALSE	TRUE
cg12847502	chr2	43437911	43437912	ZFP36L2	678	15832	Non-CGI	FALSE	FALSE	TRUE
cg12889195	chr2	113992843	113992844	LOC654433	654433	-262	CGI-N-Shore	TRUE	TRUE	FALSE
cg12903638	chr2	210636350	210636351	UNC80	285175	-365	CGI-N-Shore	TRUE	FALSE	FALSE
cg12908608	chr2	198380725	198380726	MOB4	25843	429	CGI	TRUE	TRUE	FALSE
cg12912690	chr2	239197457	239197458	PER2	8864	1284	CGI	TRUE	TRUE	FALSE
cg12928264	chr2	54683404	54683405	SPTBN1	6711	-48	CGI	TRUE	FALSE	FALSE
cg12942414	chr2	47596912	47596913	EPCAM	4072	624	CGI	FALSE	TRUE	FALSE
cg12943539	chr2	27851867	27851868	CCDC121	79635	29	CGI	TRUE	TRUE	FALSE
cg13008631	chr2	227663034	227663035	IRS1	3667	470	CGI	TRUE	FALSE	FALSE
cg13047596	chr2	233735017	233735018	C2orf82	389084	22	Non-CGI	TRUE	FALSE	FALSE
cg13086402	chr2	210674064	210674065	UNC80	285175	37346	CGI	FALSE	TRUE	FALSE
cg13172254	chr2	46843974	46843975	PIGF	5281	275	CGI	TRUE	TRUE	FALSE
cg13220917	chr2	242480249	242480250	BOK	666	-17895	CGI	FALSE	FALSE	TRUE
cg13231954	chr2	8724414	8724415	ID2	3398	-97697	CGI	FALSE	FALSE	TRUE
cg13257636	chr2	29338109	29338110	CLIP4	79745	17537	CGI	TRUE	TRUE	FALSE
cg13274077	chr2	121334614	121334615	LOC84931	84931	-110688	CGI	FALSE	FALSE	TRUE
cg13314434	chr2	239136349	239136350	LOC151174	151174	3967	CGI-S-Shore	FALSE	TRUE	FALSE
cg13316854	chr2	177027856	177027857	HOXD3	3232	-947	CGI	TRUE	FALSE	FALSE
cg13321077	chr2	220196755	220196756	RESP18	389075	1142	CGI	TRUE	TRUE	FALSE
cg13362112	chr2	97174246	97174247	NEURL3	93082	-399	CGI	TRUE	FALSE	FALSE
cg13388615	chr2	242878809	242878810	CXXC11	285093	66922	CGI	FALSE	FALSE	TRUE
cg13414444	chr2	239344617	239344618	ASB1	51665	8990	CGI	FALSE	TRUE	FALSE
cg13492070	chr2	217236785	217236786	MARCH4	57574	-34	CGI	TRUE	FALSE	FALSE
cg13522279	chr2	144635077	144635078	GTDC1	79712	455004	Non-CGI	FALSE	FALSE	TRUE
cg13530938	chr2	239140190	239140191	LOC151174	151174	126	CGI	TRUE	FALSE	FALSE
cg13575058	chr2	198380465	198380466	MOB4	25843	169	CGI	TRUE	TRUE	FALSE
cg13664964	chr2	43454185	43454186	LOC100129726	100129726	-163	CGI	TRUE	FALSE	FALSE
cg13686059	chr2	11101549	11101550	KCNF1	3754	49485	CGI	FALSE	FALSE	TRUE
cg13699355	chr2	468179	468180	FAM150B	285016	-179870	CGI	FALSE	FALSE	TRUE
cg13703721	chr2	220363632	220363633	GMPPA	29926	44	CGI	TRUE	FALSE	FALSE
cg13767070	chr2	194367276	194367277	PCGEM1	64002	752704	CGI	FALSE	FALSE	TRUE
cg13773083	chr2	220197274	220197275	RESP18	389075	623	CGI	TRUE	TRUE	FALSE
cg13831124	chr2	220253143	220253144	DNPEP	23549	11584	CGI	TRUE	TRUE	FALSE
cg13836422	chr2	20189711	20189712	WDR35	57539	171	CGI	FALSE	TRUE	FALSE
cg13851334	chr2	10686975	10686976	ODC1	4953	-98521	CGI	FALSE	FALSE	TRUE
cg13886554	chr2	112895695	112895696	FBLN7	129804	-265	CGI-N-Shore	TRUE	FALSE	FALSE
cg13895867	chr2	237076164	237076165	GBX2	2637	486	CGI	TRUE	FALSE	FALSE
cg13899678	chr2	105478933	105478934	POU3F3	5455	6963	CGI	FALSE	FALSE	TRUE
cg14005211	chr2	171676925	171676926	GAD1	2571	3724	CGI	FALSE	TRUE	FALSE
cg14157435	chr2	206628692	206628693	NRP2	8828	81467	CGI-S-Shore	FALSE	TRUE	FALSE
cg14161159	chr2	132481826	132481827	C2orf27A	29798	1761	CGI	FALSE	TRUE	FALSE
cg14163802	chr2	206547479	206547480	NRP2	8828	254	CGI	TRUE	FALSE	FALSE
cg14226755	chr2	236923322	236923323	GBX2	2637	153328	CGI-N-Shore	FALSE	TRUE	FALSE
cg14247008	chr2	242786046	242786047	PDCD1	5133	15010	CGI	FALSE	FALSE	TRUE
cg14273450	chr2	26624934	26624935	CCDC164	92749	149	CGI	TRUE	FALSE	FALSE
cg14274989	chr2	119606302	119606303	EN1	2019	-542	CGI	TRUE	FALSE	FALSE
cg14323539	chr2	928750	928751	SNTG2	54221	-17802	CGI	FALSE	FALSE	TRUE
cg14348756	chr2	79739934	79739935	MIR4264	100422888	136549	CGI	TRUE	TRUE	FALSE
cg14383422	chr2	201450962	201450963	AOX1	316	230	CGI	FALSE	TRUE	FALSE
cg14385008	chr2	3469154	3469155	ADI1	55256	54194	CGI	FALSE	TRUE	FALSE
cg14410016	chr2	176986659	176986660	HOXD9	3235	-752	CGI	TRUE	FALSE	FALSE
cg14411266	chr2	40679582	40679583	SLC8A1	6546	59991	CGI	TRUE	TRUE	FALSE
cg14453187	chr2	129492760	129492761	HS6ST1	9394	-416588	CGI	FALSE	FALSE	TRUE
cg14501281	chr2	10360265	10360266	MIR4261	100422929	-27467	CGI-N-Shore	FALSE	FALSE	TRUE
cg14507868	chr2	107503819	107503820	ST6GAL2	84620	-255	CGI	TRUE	FALSE	FALSE
cg14526718	chr2	176932840	176932841	EVX2	344191	15848	CGI	FALSE	FALSE	TRUE
cg14530444	chr2	239432329	239432330	LOC151171	151171	31809	CGI	FALSE	TRUE	FALSE
cg14552895	chr2	64068982	64068983	UGP2	7360	883	CGI	TRUE	TRUE	FALSE
cg14595315	chr2	101609869	101609870	RPL31	6160	-8820	CGI	FALSE	TRUE	FALSE
cg14608581	chr2	70122240	70122241	SNRNP27	11017	1164	CGI-S-Shore	FALSE	TRUE	FALSE
cg14636113	chr2	240742128	240742129	LOC150935	150935	57573	CGI-S-Shelf	FALSE	FALSE	TRUE
cg14649507	chr2	231735037	231735038	ITM2C	81618	5415	Non-CGI	FALSE	TRUE	FALSE
cg14659346	chr2	233246431	233246432	ALPP	250	3082	CGI	FALSE	TRUE	FALSE
cg14661464	chr2	99953763	99953764	EIF5B	9669	-69	CGI	TRUE	TRUE	FALSE
cg14664764	chr2	128433157	128433158	LIMS2	55679	6201	CGI	TRUE	TRUE	FALSE
cg14715696	chr2	176945122	176945123	EVX2	344191	3566	CGI	FALSE	TRUE	FALSE
cg14731653	chr2	219858154	219858155	CRYBA2	1412	-26	CGI	TRUE	FALSE	FALSE
cg14733936	chr2	70476139	70476140	TIA1	7072	-359	CGI	TRUE	FALSE	FALSE
cg14755414	chr2	9531144	9531145	ITGB1BP1	9270	32497	CGI	FALSE	TRUE	FALSE
cg14882311	chr2	42328410	42328411	PKDCC	91461	53248	CGI	FALSE	FALSE	TRUE
cg14917329	chr2	106468318	106468319	NCK2	8440	106797	Non-CGI	TRUE	TRUE	FALSE
cg14917572	chr2	3580506	3580507	RNASEH1	246243	25432	Non-CGI	FALSE	FALSE	TRUE
cg14927745	chr2	241562485	241562486	GPR35	2859	17659	CGI	FALSE	TRUE	FALSE
cg14935163	chr2	1488638	1488639	TPO	7173	110642	CGI	FALSE	TRUE	FALSE
cg14940308	chr2	73144644	73144645	EMX1	2016	39	CGI	TRUE	FALSE	FALSE
cg14994258	chr2	1647260	1647261	PXDN	7837	101029	Non-CGI	FALSE	TRUE	FALSE
cg15099667	chr2	219134699	219134700	AAMP	14	192	CGI	TRUE	FALSE	FALSE
cg15133748	chr2	3714379	3714380	ALLC	55821	8592	CGI	FALSE	TRUE	FALSE
cg15237819	chr2	19558375	19558376	OSR1	130497	-2	CGI	TRUE	FALSE	FALSE
cg15311822	chr2	9144618	9144619	MBOAT2	129642	-741	CGI	TRUE	FALSE	FALSE
cg15319457	chr2	239148132	239148133	HES6	55502	547	CGI	FALSE	TRUE	FALSE
cg15400238	chr2	154335640	154335641	RPRM	56475	-317	CGI	TRUE	FALSE	FALSE
cg15423357	chr2	25149977	25149978	ADCY3	109	-7921	CGI	FALSE	FALSE	TRUE
cg15579587	chr2	238600061	238600062	LRRFIP1	9208	63836	CGI	TRUE	TRUE	FALSE
cg15605030	chr2	95992762	95992763	KCNIP3	30818	29689	CGI-S-Shore	FALSE	TRUE	FALSE
cg15607387	chr2	231714575	231714576	ITM2C	81618	-15044	CGI	FALSE	FALSE	TRUE
cg15612053	chr2	233899246	233899247	NEU2	4759	1863	CGI	FALSE	TRUE	FALSE
cg15742519	chr2	190627263	190627264	OSGEPL1	64172	688	CGI-N-Shore	FALSE	TRUE	FALSE
cg15754594	chr2	106184688	106184689	LOC285000	285000	42326	CGI	FALSE	FALSE	TRUE
cg15769486	chr2	85132558	85132559	TMSB10	9168	-203	CGI	TRUE	FALSE	FALSE
cg15770238	chr2	11822287	11822288	LPIN1	23175	4565	CGI-N-Shore	FALSE	TRUE	FALSE
cg15806038	chr2	3601756	3601757	RNASEH1	246243	4182	CGI-N-Shelf	FALSE	TRUE	FALSE
cg15833099	chr2	133402999	133403000	LYPD1	116372	26069	CGI	FALSE	TRUE	FALSE
cg15893070	chr2	190445551	190445552	SLC40A1	30061	2931	CGI	TRUE	TRUE	FALSE
cg15910994	chr2	97001734	97001735	NCAPH	23397	249	CGI	FALSE	TRUE	FALSE
cg15911409	chr2	237481080	237481081	CXCR7	57007	11655	CGI-S-Shelf	FALSE	TRUE	FALSE
cg15929228	chr2	240323491	240323492	HDAC4	9759	-144	CGI	TRUE	FALSE	FALSE
cg15981851	chr2	236773924	236773925	GBX2	2637	302726	CGI	FALSE	TRUE	FALSE
cg16023545	chr2	237076726	237076727	GBX2	2637	-73	CGI	TRUE	FALSE	FALSE
cg16200531	chr2	135532566	135532567	TMEM163	81615	-7231	Non-CGI	FALSE	FALSE	TRUE
cg16203330	chr2	65658524	65658525	SPRED2	200734	1130	CGI	FALSE	TRUE	FALSE
cg16205389	chr2	239079215	239079216	KLHL30	377007	31851	Non-CGI	FALSE	TRUE	FALSE
cg16227748	chr2	232186992	232186993	MIR4777	100616317	-40425	Non-CGI	FALSE	TRUE	FALSE
cg16259268	chr2	233470724	233470725	EFHD1	80303	-41	CGI	TRUE	FALSE	FALSE
cg16327883	chr2	112812775	112812776	TMEM87B	84910	-23	CGI	TRUE	FALSE	FALSE
cg16405026	chr2	145281942	145281943	ZEB2-AS1	100303491	-3475	CGI	FALSE	FALSE	TRUE
cg16440561	chr2	220312854	220312855	SPEG	10290	13153	CGI	TRUE	TRUE	FALSE
cg16517634	chr2	8977876	8977877	KIDINS220	57498	-120	CGI	TRUE	FALSE	FALSE
cg16585651	chr2	119532230	119532231	EN1	2019	73527	CGI	FALSE	FALSE	TRUE
cg16640855	chr2	182543233	182543234	CERKL	375298	2146	CGI	TRUE	TRUE	FALSE
cg16723488	chr2	21266947	21266948	APOB	338	-1	CGI	TRUE	FALSE	FALSE
cg16781647	chr2	73151595	73151596	EMX1	2016	6990	CGI	FALSE	TRUE	FALSE
cg16832267	chr2	18060102	18060103	KCNS3	3790	987	CGI	FALSE	TRUE	FALSE
cg16838838	chr2	85641023	85641024	CAPG	822	145	CGI	FALSE	TRUE	FALSE
cg16926316	chr2	219256101	219256102	CTDSP1	58190	-6958	CGI	FALSE	TRUE	FALSE
cg16989378	chr2	230786828	230786829	TRIP12	9320	-172	CGI	TRUE	FALSE	FALSE
cg17032565	chr2	110260096	110260097	2010-09-01	151011	111685	CGI-S-Shore	FALSE	TRUE	FALSE
cg17148976	chr2	131594925	131594926	ARHGEF4	50649	-77859	CGI	TRUE	FALSE	FALSE
cg17156255	chr2	27632527	27632528	PPM1G	5496	-30	CGI	TRUE	FALSE	FALSE
cg17156491	chr2	43259508	43259509	ZFP36L2	678	194235	Non-CGI	FALSE	FALSE	TRUE
cg17168093	chr2	85531486	85531487	TGOLN2	10618	23931	Non-CGI	FALSE	TRUE	FALSE
cg17177632	chr2	131512961	131512962	AMER3	205147	-114	CGI-N-Shore	TRUE	FALSE	FALSE
cg17178336	chr2	219925246	219925247	IHH	3549	-7	CGI	TRUE	FALSE	FALSE
cg17186168	chr2	11810403	11810404	NTSR2	23620	-73	CGI	TRUE	FALSE	FALSE
cg17245188	chr2	149632709	149632710	KIF5C	3800	-81	CGI	TRUE	FALSE	FALSE
cg17246140	chr2	43020264	43020265	HAAO	23498	-512	CGI	TRUE	FALSE	FALSE
cg17257554	chr2	242004824	242004825	MTERFD2	130916	36921	CGI	TRUE	TRUE	FALSE
cg17263026	chr2	121453143	121453144	GLI2	2736	-40054	CGI-N-Shore	FALSE	FALSE	TRUE
cg17332338	chr2	38763354	38763355	HNRPLL	92906	66822	CGI	FALSE	FALSE	TRUE
cg17360854	chr2	161224771	161224772	MIR4785	100616364	39620	Non-CGI	FALSE	TRUE	FALSE
cg17418743	chr2	16689423	16689424	FAM49A	81553	157709	CGI	FALSE	FALSE	TRUE
cg17459215	chr2	66298242	66298243	MIR4778	100616464	287216	Non-CGI	FALSE	TRUE	FALSE
cg17530231	chr2	237082534	237082535	GBX2	2637	-5881	CGI	FALSE	FALSE	TRUE
cg17590938	chr2	97202435	97202436	ARID5A	10865	-27	CGI	TRUE	FALSE	FALSE
cg17669542	chr2	84743555	84743556	DNAH6	1768	-22	CGI	TRUE	FALSE	FALSE
cg17673769	chr2	46707773	46707774	TMEM247	388946	1068	CGI	FALSE	TRUE	FALSE
cg17693669	chr2	8711075	8711076	ID2	3398	-111036	CGI	FALSE	FALSE	TRUE
cg17745211	chr2	74725369	74725370	LBX2-AS1	151534	-4373	CGI	FALSE	TRUE	FALSE
cg17842354	chr2	214149035	214149036	SPAG16	79582	-79	CGI	TRUE	FALSE	FALSE
cg17850055	chr2	239403239	239403240	LOC151171	151171	60899	CGI	FALSE	FALSE	TRUE
cg17851725	chr2	121269372	121269373	LOC84931	84931	-45446	Non-CGI	FALSE	FALSE	TRUE
cg17933107	chr2	27334851	27334852	CGREF1	10669	7142	CGI	TRUE	TRUE	FALSE
cg17939889	chr2	240174650	240174651	MIR4269	100423043	-52505	CGI	FALSE	TRUE	FALSE
cg17945962	chr2	67939740	67939741	ETAA1	54465	315297	Non-CGI	FALSE	FALSE	TRUE
cg17962090	chr2	127728910	127728911	BIN1	274	135991	CGI	FALSE	FALSE	TRUE
cg17974674	chr2	241451567	241451568	DUSP28	285193	-47902	Non-CGI	FALSE	TRUE	FALSE
cg17976576	chr2	128432610	128432611	LIMS2	55679	6748	CGI	TRUE	TRUE	FALSE
cg18030798	chr2	158155471	158155472	ERMN	57471	28673	CGI	FALSE	TRUE	FALSE
cg18077971	chr2	223164867	223164868	PAX3	5077	-1151	CGI	TRUE	TRUE	FALSE
cg18098774	chr2	107084802	107084803	RGPD3	653489	0	CGI	TRUE	FALSE	FALSE
cg18126883	chr2	112641630	112641631	ANAPC1	64682	109	CGI	TRUE	FALSE	FALSE
cg18148375	chr2	1926535	1926536	PXDN	7837	-178243	CGI	TRUE	TRUE	FALSE
cg18182399	chr2	220283175	220283176	DES	1674	75	CGI	TRUE	FALSE	FALSE
cg18192325	chr2	105854051	105854052	GPR45	11250	-4147	CGI-S-Shore	FALSE	FALSE	TRUE
cg18206867	chr2	62422351	62422352	B3GNT2	10678	-909	CGI	TRUE	FALSE	FALSE
cg18219563	chr2	27487458	27487459	SLC30A3	7781	10728	CGI	TRUE	TRUE	FALSE
cg18279994	chr2	54950960	54950961	EML6	400954	-1187	CGI	TRUE	FALSE	FALSE
cg18303215	chr2	44059003	44059004	ABCG5	64240	6999	CGI	TRUE	TRUE	FALSE
cg18310707	chr2	70121019	70121020	SNRNP27	11017	-54	CGI-N-Shore	TRUE	FALSE	FALSE
cg18334412	chr2	152955206	152955207	CACNB4	785	385	CGI	TRUE	TRUE	FALSE
cg18339598	chr2	238065252	238065253	COPS8	10920	71167	CGI	FALSE	FALSE	TRUE
cg18386867	chr2	39347986	39347987	SOS1	6654	3498	CGI	TRUE	TRUE	FALSE
cg18406033	chr2	223159869	223159870	CCDC140	151278	-2995	CGI	FALSE	TRUE	FALSE
cg18406852	chr2	101010769	101010770	CHST10	9486	23359	CGI-S-Shore	FALSE	TRUE	FALSE
cg18430156	chr2	187558795	187558796	FAM171B	165215	5	CGI	TRUE	FALSE	FALSE
cg18524934	chr2	97164073	97164074	NEURL3	93082	9771	CGI-N-Shelf	FALSE	TRUE	FALSE
cg18543164	chr2	22409266	22409267	LOC645949	645949	-475741	CGI	FALSE	FALSE	TRUE
cg18549688	chr2	236299625	236299626	AGAP1	116987	-103106	CGI-N-Shore	FALSE	FALSE	TRUE
cg18667659	chr2	99438903	99438904	MGAT4A	11320	-91313	CGI	FALSE	TRUE	FALSE
cg18669186	chr2	119614594	119614595	EN1	2019	-8834	CGI	FALSE	FALSE	TRUE
cg18686665	chr2	629121	629122	TMEM18	129787	48316	CGI	FALSE	FALSE	TRUE
cg18703066	chr2	105363536	105363537	LOC284998	284998	10639	CGI	FALSE	TRUE	FALSE
cg18731976	chr2	11485413	11485414	ROCK2	9475	-701	CGI	TRUE	FALSE	FALSE
cg18734842	chr2	75787193	75787194	EVA1A	84141	9653	CGI-N-Shore	FALSE	TRUE	FALSE
cg18743464	chr2	131089942	131089943	CCDC115	84317	9978	CGI	FALSE	FALSE	TRUE
cg18762104	chr2	97535692	97535693	SEMA4C	54910	41	CGI	TRUE	FALSE	FALSE
cg18794122	chr2	1652585	1652586	PXDN	7837	95704	CGI	FALSE	TRUE	FALSE
cg18845578	chr2	240003174	240003175	MIR4441	100616493	4446	CGI	FALSE	TRUE	FALSE
cg18867200	chr2	71116698	71116699	VAX2	25806	-11020	CGI	FALSE	FALSE	TRUE
cg18941818	chr2	157184553	157184554	NR4A2	4929	4732	CGI	TRUE	TRUE	FALSE
cg18969008	chr2	10445016	10445017	HPCAL1	3241	1975	CGI	FALSE	TRUE	FALSE
cg18985828	chr2	467799	467800	FAM150B	285016	-179490	CGI	FALSE	FALSE	TRUE
cg19025700	chr2	106016179	106016180	FHL2	2274	39049	CGI	TRUE	TRUE	FALSE
cg19053239	chr2	149645394	149645395	KIF5C	3800	12601	CGI-N-Shore	FALSE	TRUE	FALSE
cg19177701	chr2	111435858	111435859	BUB1	699	-173	CGI	TRUE	FALSE	FALSE
cg19197830	chr2	170681574	170681575	METTL5	29081	-153	CGI	TRUE	FALSE	FALSE
cg19205847	chr2	239800268	239800269	TWIST2	117581	43594	CGI-S-Shore	FALSE	FALSE	TRUE
cg19224201	chr2	119615015	119615016	EN1	2019	-9255	CGI	FALSE	FALSE	TRUE
cg19303849	chr2	145090156	145090157	GTDC1	79712	-72	CGI	TRUE	FALSE	FALSE
cg19390934	chr2	242027520	242027521	MTERFD2	130916	14225	CGI-S-Shore	FALSE	TRUE	FALSE
cg19399165	chr2	27301252	27301253	EMILIN1	11117	-181	CGI-N-Shore	TRUE	FALSE	FALSE
cg19432688	chr2	1763410	1763411	PXDN	7837	-15118	CGI	FALSE	FALSE	TRUE
cg19456914	chr2	241530156	241530157	CAPN10	11132	4022	CGI	FALSE	TRUE	FALSE
cg19486585	chr2	109151054	109151055	LIMS1	3987	242	CGI	TRUE	TRUE	FALSE
cg19504661	chr2	239542427	239542428	LOC151171	151171	-78286	CGI	FALSE	FALSE	TRUE
cg19538089	chr2	171673547	171673548	GAD1	2571	346	CGI	TRUE	FALSE	FALSE
cg19540797	chr2	3607301	3607302	LOC100506054	100506054	1324	CGI-S-Shore	TRUE	TRUE	FALSE
cg19560692	chr2	20646664	20646665	RHOB	388	-169	CGI	TRUE	FALSE	FALSE
cg19576736	chr2	120240175	120240176	SCTR	6344	41851	Non-CGI	FALSE	TRUE	FALSE
cg19719653	chr2	120124522	120124523	DBI	1622	17	CGI	TRUE	FALSE	FALSE
cg19752861	chr2	74153213	74153214	DGUOK	1716	-738	CGI-N-Shore	TRUE	FALSE	FALSE
cg19757382	chr2	241076313	241076314	MYEOV2	150678	-548	CGI	TRUE	FALSE	FALSE
cg19863227	chr2	98280523	98280524	ACTR1B	10120	36	CGI	TRUE	FALSE	FALSE
cg19863760	chr2	74667680	74667681	RTKN	6242	1378	CGI	TRUE	TRUE	FALSE
cg19878627	chr2	54087184	54087185	GPR75	10936	-13	CGI	TRUE	FALSE	FALSE
cg19893929	chr2	16105823	16105824	MYCNOS	10408	-23977	Non-CGI	FALSE	FALSE	TRUE
cg19906093	chr2	191045697	191045698	C2orf88	84281	43210	CGI	TRUE	TRUE	FALSE
cg19908362	chr2	240029909	240029910	MIR4441	100616493	-22286	CGI	FALSE	TRUE	FALSE
cg19910796	chr2	131449749	131449750	CYP4F30P	100132708	12125	CGI-N-Shore	TRUE	FALSE	FALSE
cg19936585	chr2	139259770	139259771	SPOPL	339745	419	CGI	FALSE	TRUE	FALSE
cg19961545	chr2	54087066	54087067	GPR75	10936	102	CGI	TRUE	FALSE	FALSE
cg19979107	chr2	175351956	175351957	GPR155	151556	-144	CGI	TRUE	FALSE	FALSE
cg20019365	chr2	219134978	219134979	AAMP	14	-84	CGI	TRUE	FALSE	FALSE
cg20042692	chr2	55450874	55450875	RPS27A	6233	-8163	CGI-S-Shore	FALSE	TRUE	FALSE
cg20057198	chr2	731561	731562	TMEM18	129787	-54121	CGI	FALSE	FALSE	TRUE
cg20072442	chr2	80530255	80530256	LRRTM1	347730	1230	CGI	TRUE	TRUE	FALSE
cg20093808	chr2	9563643	9563644	ITGB1BP1	9270	0	CGI	TRUE	FALSE	FALSE
cg20095674	chr2	210673274	210673275	UNC80	285175	36556	CGI-N-Shore	FALSE	TRUE	FALSE
cg20139706	chr2	237068750	237068751	GBX2	2637	7900	CGI	FALSE	FALSE	TRUE
cg20201270	chr2	45397874	45397875	UNQ6975	400952	84204	CGI	FALSE	FALSE	TRUE
cg20225749	chr2	946127	946128	SNTG2	54221	-425	CGI	TRUE	FALSE	FALSE
cg20296532	chr2	120282272	120282273	SCTR	6344	-243	CGI	TRUE	FALSE	FALSE
cg20314884	chr2	220108094	220108095	GLB1L	79411	2035	CGI	FALSE	TRUE	FALSE
cg20340806	chr2	74405946	74405947	MOB1A	55233	47	CGI	TRUE	FALSE	FALSE
cg20365074	chr2	189157191	189157192	GULP1	51454	794	CGI	TRUE	TRUE	FALSE
cg20389472	chr2	171568526	171568527	LOC440925	440925	2549	CGI	FALSE	FALSE	TRUE
cg20391058	chr2	2295451	2295452	LOC730811	730811	-27551	CGI	FALSE	TRUE	FALSE
cg20398486	chr2	176944442	176944443	EVX2	344191	4246	CGI	FALSE	FALSE	TRUE
cg20457942	chr2	3605983	3605984	LOC100506054	100506054	6	CGI	TRUE	FALSE	FALSE
cg20491914	chr2	26915349	26915350	KCNK3	3777	-230	CGI-N-Shore	TRUE	FALSE	FALSE
cg20495333	chr2	121107947	121107948	INHBB	3625	4227	CGI	FALSE	TRUE	FALSE
cg20558320	chr2	235210313	235210314	ARL4C	10123	195378	Non-CGI	FALSE	FALSE	TRUE
cg20608192	chr2	113194973	113194974	RGPD8	727851	-2910	CGI-S-Shelf	FALSE	FALSE	TRUE
cg20649017	chr2	176980837	176980838	HOXD10	3236	-653	CGI	TRUE	FALSE	FALSE
cg20679271	chr2	128350442	128350443	GPR17	2840	-52995	CGI	FALSE	TRUE	FALSE
cg20679626	chr2	489360	489361	TMEM18	129787	188077	CGI	FALSE	FALSE	TRUE
cg20690483	chr2	96874741	96874742	STARD7	56910	-167	CGI	TRUE	TRUE	FALSE
cg20691617	chr2	85142974	85142975	TMSB10	9168	10210	CGI	FALSE	FALSE	TRUE
cg20709008	chr2	182545934	182545935	NEUROD1	4760	-541	CGI	TRUE	FALSE	FALSE
cg20731257	chr2	87883497	87883498	MIR4435-1	100616499	-45775	CGI-N-Shore	FALSE	TRUE	FALSE
cg20804191	chr2	237076171	237076172	GBX2	2637	479	CGI	TRUE	FALSE	FALSE
cg20842253	chr2	27529788	27529789	UCN	7349	1340	CGI	FALSE	TRUE	FALSE
cg20852890	chr2	99552737	99552738	KIAA1211L	343990	-52	CGI	TRUE	FALSE	FALSE
cg20856893	chr2	242997758	242997759	LOC728323	728323	-33084	CGI	FALSE	FALSE	TRUE
cg20931705	chr2	101042998	101042999	CHST10	9486	-8867	CGI	FALSE	FALSE	TRUE
cg21061994	chr2	866867	866868	LOC339822	339822	-2754	CGI-S-Shore	FALSE	FALSE	TRUE
cg21076935	chr2	10861602	10861603	ATP6V1C2	245973	-171	CGI	TRUE	FALSE	FALSE
cg21082122	chr2	3307517	3307518	TSSC1	7260	74134	CGI	FALSE	TRUE	FALSE
cg21083314	chr2	27994244	27994245	MRPL33	9553	-338	CGI-N-Shore	TRUE	FALSE	FALSE
cg21117965	chr2	220325369	220325370	SPEG	10290	25668	Non-CGI	TRUE	TRUE	FALSE
cg21119375	chr2	44393385	44393386	PPM1B	5495	-2613	CGI-N-Shore	FALSE	FALSE	TRUE
cg21122225	chr2	238832508	238832509	UBE2F-SCLY	100533179	-43077	CGI	FALSE	FALSE	TRUE
cg21135616	chr2	240294246	240294247	MIR2467	100616360	-20746	CGI	FALSE	TRUE	FALSE
cg21149147	chr2	201753800	201753801	PPIL3	53938	47	CGI	TRUE	FALSE	FALSE
cg21155418	chr2	264767	264768	SH3YL1	26751	41	CGI	TRUE	TRUE	FALSE
cg21233275	chr2	136634095	136634096	MCM6	4175	-83	CGI	TRUE	FALSE	FALSE
cg21239227	chr2	2111623	2111624	LOC730811	730811	-211379	Non-CGI	FALSE	TRUE	FALSE
cg21270243	chr2	216176248	216176249	ATIC	471	-429	CGI-N-Shore	TRUE	FALSE	FALSE
cg21272465	chr2	239140296	239140297	LOC151174	151174	20	CGI	TRUE	FALSE	FALSE
cg21273584	chr2	503065	503066	TMEM18	129787	174372	CGI	FALSE	FALSE	TRUE
cg21311850	chr2	210867278	210867279	RPE	6120	-72	CGI	TRUE	FALSE	FALSE
cg21384492	chr2	241938321	241938322	SNED1	25992	65	CGI	TRUE	FALSE	FALSE
cg21450708	chr2	27008453	27008454	CENPA	1058	-427	CGI	TRUE	FALSE	FALSE
cg21463554	chr2	495912	495913	TMEM18	129787	181525	CGI	FALSE	FALSE	TRUE
cg21475150	chr2	101618248	101618249	RPL31	6160	-441	CGI-N-Shore	TRUE	FALSE	FALSE
cg21485895	chr2	200321016	200321017	SATB2-AS1	150538	-11803	CGI	TRUE	TRUE	FALSE
cg21488538	chr2	98964436	98964437	CNGA3	1261	1817	CGI	FALSE	TRUE	FALSE
cg21531908	chr2	109789810	109789811	MIR4265	100422863	-31765	CGI-S-Shore	FALSE	TRUE	FALSE
cg21550016	chr2	113992930	113992931	LOC654433	654433	-175	CGI	TRUE	TRUE	FALSE
cg21579828	chr2	148601738	148601739	ACVR2A	92	-346	CGI	TRUE	FALSE	FALSE
cg21583565	chr2	174219336	174219337	CDCA7	83879	-223	CGI	TRUE	FALSE	FALSE
cg21594328	chr2	206830726	206830727	INO80D	54891	120178	Non-CGI	FALSE	FALSE	TRUE
cg21665164	chr2	95787889	95787890	MRPS5	64969	-134	CGI	TRUE	FALSE	FALSE
cg21674835	chr2	239039107	239039108	KLHL30	377007	-8254	CGI	FALSE	TRUE	FALSE
cg21759953	chr2	121748257	121748258	GLI2	2736	255057	CGI-S-Shore	FALSE	TRUE	FALSE
cg21821308	chr2	9533606	9533607	ITGB1BP1	9270	30035	CGI-S-Shelf	FALSE	TRUE	FALSE
cg21847751	chr2	232379328	232379329	LINC00471	151477	-277	CGI	TRUE	FALSE	FALSE
cg21855830	chr2	127963489	127963490	CYP27C1	339761	14163	CGI-S-Shore	TRUE	TRUE	FALSE
cg21926875	chr2	47596410	47596411	EPCAM	4072	122	CGI	TRUE	FALSE	FALSE
cg21949333	chr2	230136146	230136147	PID1	55022	-88	CGI	TRUE	FALSE	FALSE
cg21990808	chr2	228336774	228336775	AGFG1	3267	-112	CGI	TRUE	FALSE	FALSE
cg22016870	chr2	237980832	237980833	COPS8	10920	-13250	Non-CGI	FALSE	TRUE	FALSE
cg22070462	chr2	26395155	26395156	GAREML	150946	-803	CGI	TRUE	FALSE	FALSE
cg22107710	chr2	55289198	55289199	RTN4	57142	-11463	CGI	FALSE	FALSE	TRUE
cg22112075	chr2	85658146	85658147	SH2D6	284948	12091	Non-CGI	FALSE	TRUE	FALSE
cg22116328	chr2	240868565	240868566	MIR4786	100616417	13944	CGI	FALSE	FALSE	TRUE
cg22157099	chr2	15830172	15830173	DDX1	1653	98401	Non-CGI	TRUE	FALSE	FALSE
cg22190437	chr2	229045417	229045418	SPHKAP	80309	942	CGI	FALSE	TRUE	FALSE
cg22277636	chr2	218621320	218621321	DIRC3	729582	-3	CGI	TRUE	FALSE	FALSE
cg22306928	chr2	219866424	219866425	MIR375	494324	4	CGI	TRUE	FALSE	FALSE
cg22385827	chr2	211036478	211036479	KANSL1L	151050	-426	CGI	TRUE	FALSE	FALSE
cg22400015	chr2	220196714	220196715	RESP18	389075	1183	CGI	TRUE	TRUE	FALSE
cg22400703	chr2	68545995	68545996	CNRIP1	25927	1186	CGI	FALSE	TRUE	FALSE
cg22475025	chr2	43864340	43864341	PLEKHH2	130271	-97	CGI-N-Shore	TRUE	FALSE	FALSE
cg22488859	chr2	38303831	38303832	CYP1B1	1545	-507	CGI-S-Shore	TRUE	FALSE	FALSE
cg22496339	chr2	162101262	162101263	PSMD14	10213	-63522	CGI	TRUE	FALSE	FALSE
cg22511877	chr2	1942942	1942943	PXDN	7837	-194650	CGI-S-Shore	FALSE	TRUE	FALSE
cg22545206	chr2	118617499	118617500	DDX18	8886	45243	CGI	FALSE	FALSE	TRUE
cg22650617	chr2	71017541	71017542	FIGLA	344018	232	CGI	TRUE	FALSE	FALSE
cg22670147	chr2	115419740	115419741	DPP10	57628	219840	CGI	FALSE	TRUE	FALSE
cg22712983	chr2	219187374	219187375	TMBIM1	64114	-30093	CGI-N-Shore	TRUE	TRUE	FALSE
cg22745354	chr2	928720	928721	SNTG2	54221	-17832	CGI	FALSE	FALSE	TRUE
cg22866015	chr2	133174136	133174137	GPR39	2863	-9	CGI	TRUE	FALSE	FALSE
cg22903655	chr2	27580036	27580037	GTF3C2	2976	-167	CGI	TRUE	FALSE	FALSE
cg22923268	chr2	128784914	128784915	SAP130	79595	717	CGI	TRUE	TRUE	FALSE
cg22923398	chr2	132919865	132919866	MIR663B	100313824	94786	CGI	TRUE	TRUE	FALSE
cg23009452	chr2	25264872	25264873	EFR3B	22979	-99	CGI	TRUE	FALSE	FALSE
cg23039201	chr2	27851887	27851888	CCDC121	79635	9	CGI	TRUE	TRUE	FALSE
cg23040685	chr2	1093532	1093533	SNTG2	54221	146977	CGI	FALSE	TRUE	FALSE
cg23045258	chr2	228029046	228029047	COL4A4	1286	227	CGI	TRUE	FALSE	FALSE
cg23051046	chr2	223177574	223177575	PAX3	5077	-13858	CGI	FALSE	FALSE	TRUE
cg23051299	chr2	75938289	75938290	GCFC2	6936	-177	CGI	TRUE	FALSE	FALSE
cg23069877	chr2	3486221	3486222	ADI1	55256	37127	CGI-N-Shore	FALSE	TRUE	FALSE
cg23107161	chr2	27938371	27938372	SUPT7L	9913	-51921	CGI	FALSE	TRUE	FALSE
cg23136742	chr2	26950956	26950957	KCNK3	3777	35374	CGI	FALSE	TRUE	FALSE
cg23241628	chr2	55278043	55278044	RTN4	57142	-308	CGI	TRUE	FALSE	FALSE
cg23256664	chr2	48757477	48757478	STON1	11037	168	CGI	FALSE	TRUE	FALSE
cg23279522	chr2	66659348	66659349	MEIS1	4211	-3182	CGI	FALSE	FALSE	TRUE
cg23279792	chr2	242987510	242987511	LOC728323	728323	-43332	CGI	FALSE	FALSE	TRUE
cg23325963	chr2	45160093	45160094	SIX3	6496	-8942	CGI	FALSE	FALSE	TRUE
cg23348270	chr2	176969612	176969613	HOXD11	3237	361	CGI	FALSE	TRUE	FALSE
cg23420260	chr2	177053285	177053286	HOXD1	3231	-20	CGI	TRUE	TRUE	FALSE
cg23491599	chr2	155554688	155554689	KCNJ3	3760	-403	CGI	TRUE	FALSE	FALSE
cg23541422	chr2	8714363	8714364	ID2	3398	-107748	CGI	FALSE	FALSE	TRUE
cg23547017	chr2	177030171	177030172	HOXD3	3232	1365	CGI	FALSE	TRUE	FALSE
cg23563438	chr2	173292207	173292208	ITGA6	3655	124	CGI	TRUE	TRUE	FALSE
cg23621652	chr2	207630148	207630149	FASTKD2	22868	35	CGI	TRUE	FALSE	FALSE
cg23649088	chr2	200775458	200775459	C2orf69	205327	-519	CGI-N-Shore	TRUE	FALSE	FALSE
cg23650279	chr2	239072961	239072962	KLHL30	377007	25597	CGI	TRUE	TRUE	FALSE
cg23655816	chr2	162164767	162164768	PSMD14	10213	-17	CGI	TRUE	FALSE	FALSE
cg23668184	chr2	5836713	5836714	SOX11	6664	3913	CGI	TRUE	FALSE	FALSE
cg23687269	chr2	732577	732578	TMEM18	129787	-55137	CGI	FALSE	FALSE	TRUE
cg23780110	chr2	26045244	26045245	ASXL2	55252	56066	CGI	FALSE	TRUE	FALSE
cg23807890	chr2	228736357	228736358	DAW1	164781	29	CGI	TRUE	FALSE	FALSE
cg23811268	chr2	20189267	20189268	WDR35	57539	615	CGI-N-Shore	FALSE	TRUE	FALSE
cg23897319	chr2	241366765	241366766	GPC1	2817	-8348	Non-CGI	FALSE	FALSE	TRUE
cg23899450	chr2	242787324	242787325	PDCD1	5133	13732	CGI	FALSE	FALSE	TRUE
cg23923070	chr2	71558899	71558900	ZNF638	27332	55175	CGI	TRUE	TRUE	FALSE
cg23927687	chr2	233766118	233766119	C2orf82	389084	31123	CGI	TRUE	TRUE	FALSE
cg23948843	chr2	164204752	164204753	FIGN	55137	387759	CGI	FALSE	FALSE	TRUE
cg23977011	chr2	220437318	220437319	INHA	3623	363	CGI-S-Shore	TRUE	FALSE	FALSE
cg23977821	chr2	24270452	24270453	C2orf44	80304	-155	CGI	TRUE	FALSE	FALSE
cg23978155	chr2	204400166	204400167	RAPH1	65059	-107	CGI	TRUE	FALSE	FALSE
cg23993463	chr2	234847856	234847857	TRPM8	79054	21812	CGI	FALSE	TRUE	FALSE
cg24011073	chr2	11917787	11917788	MIR4262	100422996	59323	CGI	FALSE	TRUE	FALSE
cg24071726	chr2	171571151	171571152	LOC440925	440925	-73	CGI	TRUE	FALSE	FALSE
cg24079702	chr2	106015771	106015772	FHL2	2274	39457	CGI	TRUE	TRUE	FALSE
cg24194413	chr2	192746039	192746040	SDPR	8436	-34032	CGI-N-Shore	FALSE	FALSE	TRUE
cg24215279	chr2	1518383	1518384	TPO	7173	140387	CGI-S-Shelf	FALSE	TRUE	FALSE
cg24229662	chr2	121499644	121499645	GLI2	2736	6444	CGI	FALSE	TRUE	FALSE
cg24231380	chr2	242813914	242813915	CXXC11	285093	2027	CGI	FALSE	TRUE	FALSE
cg24301350	chr2	200776224	200776225	C2orf69	205327	244	CGI	TRUE	FALSE	FALSE
cg24345062	chr2	200334439	200334440	SATB2	23314	1548	CGI	TRUE	TRUE	FALSE
cg24364967	chr2	55450577	55450578	RPS27A	6233	-8460	CGI	FALSE	TRUE	FALSE
cg24393552	chr2	239014989	239014990	ESPNL	339768	6037	Non-CGI	TRUE	TRUE	FALSE
cg24403033	chr2	112812772	112812773	TMEM87B	84910	-26	CGI	TRUE	FALSE	FALSE
cg24419828	chr2	201171294	201171295	SPATS2L	26010	689	CGI	TRUE	TRUE	FALSE
cg24478096	chr2	160761085	160761086	LY75-CD302	100526664	180	CGI	FALSE	TRUE	FALSE
cg24478803	chr2	26786046	26786047	C2orf70	339778	564	CGI	FALSE	TRUE	FALSE
cg24519533	chr2	135226787	135226788	MGAT5	4249	214956	CGI	FALSE	TRUE	FALSE
cg24551396	chr2	242895660	242895661	CXXC11	285093	83773	CGI	FALSE	FALSE	TRUE
cg24575676	chr2	180726035	180726036	ZNF385B	151126	195	CGI	TRUE	FALSE	FALSE
cg24586870	chr2	233198590	233198591	ALPP	250	-44756	CGI-N-Shore	FALSE	TRUE	FALSE
cg24603464	chr2	238395852	238395853	MLPH	79083	798	CGI	TRUE	TRUE	FALSE
cg24607290	chr2	64751503	64751504	AFTPH	54812	63	CGI	TRUE	FALSE	FALSE
cg24609304	chr2	32483287	32483288	NLRC4	58484	7523	CGI	FALSE	TRUE	FALSE
cg24617723	chr2	187714003	187714004	ZSWIM2	151112	-105	CGI	TRUE	FALSE	FALSE
cg24631450	chr2	234262952	234262953	DGKD	8527	-199	CGI-S-Shore	TRUE	FALSE	FALSE
cg24633978	chr2	176972581	176972582	HOXD11	3237	3330	CGI	TRUE	TRUE	FALSE
cg24673771	chr2	45180267	45180268	SIX3	6496	11229	CGI	FALSE	FALSE	TRUE
cg24678040	chr2	242659424	242659425	D2HGDH	728294	-14604	CGI-N-Shore	FALSE	TRUE	FALSE
cg24681695	chr2	170550946	170550947	CCDC173	129881	-14	CGI	TRUE	FALSE	FALSE
cg24688655	chr2	200331977	200331978	SATB2-AS1	150538	-842	CGI-N-Shore	TRUE	TRUE	FALSE
cg24744501	chr2	207024175	207024176	NDUFS1	4719	66	CGI	TRUE	FALSE	FALSE
cg24746100	chr2	88751786	88751787	FOXI3	344167	265	CGI	TRUE	FALSE	FALSE
cg24767315	chr2	241525811	241525812	CAPN10	11132	-320	CGI	TRUE	FALSE	FALSE
cg24769499	chr2	120189242	120189243	TMEM37	140738	-202	CGI	TRUE	FALSE	FALSE
cg24885082	chr2	11051973	11051974	KCNF1	3754	-88	CGI	TRUE	FALSE	FALSE
cg24887265	chr2	45233528	45233529	SIX2	10736	3012	CGI	FALSE	TRUE	FALSE
cg24915947	chr2	210636783	210636784	UNC80	285175	65	CGI	TRUE	FALSE	FALSE
cg24923516	chr2	127955156	127955157	CYP27C1	339761	22496	Non-CGI	FALSE	TRUE	FALSE
cg24927800	chr2	220283214	220283215	DES	1674	114	CGI	TRUE	FALSE	FALSE
cg24941797	chr2	241526520	241526521	CAPN10	11132	386	CGI	FALSE	TRUE	FALSE
cg24980657	chr2	150177277	150177278	LYPD6	130574	-9220	CGI	FALSE	FALSE	TRUE
cg24996605	chr2	128381653	128381654	GPR17	2840	-21784	CGI	FALSE	TRUE	FALSE
cg25023043	chr2	84743684	84743685	DNAH6	1768	104	CGI	TRUE	FALSE	FALSE
cg25036284	chr2	26402008	26402009	GAREML	150946	6047	CGI	TRUE	TRUE	FALSE
cg25137582	chr2	157474713	157474714	GPD2	2820	182747	CGI	FALSE	FALSE	TRUE
cg25240445	chr2	37458543	37458544	CEBPZ	10153	195	CGI	TRUE	TRUE	FALSE
cg25242471	chr2	219738732	219738733	WNT10A	80326	-6521	CGI	FALSE	TRUE	FALSE
cg25298319	chr2	233217079	233217080	ALPP	250	-26267	CGI	FALSE	FALSE	TRUE
cg25337514	chr2	9285975	9285976	ASAP2	8853	-60917	CGI-N-Shore	FALSE	FALSE	TRUE
cg25347419	chr2	177043501	177043502	HOXD1	3231	-9804	CGI-S-Shore	TRUE	TRUE	FALSE
cg25442273	chr2	132183108	132183109	LOC401010	401010	19357	CGI-S-Shore	FALSE	FALSE	TRUE
cg25471520	chr2	166813804	166813805	TTC21B	79809	-3455	CGI	FALSE	FALSE	TRUE
cg25479788	chr2	79220217	79220218	REG3G	130120	-32607	CGI	FALSE	FALSE	TRUE
cg25534953	chr2	97174206	97174207	NEURL3	93082	-359	CGI	TRUE	FALSE	FALSE
cg25567448	chr2	97175065	97175066	NEURL3	93082	-1218	CGI	TRUE	FALSE	FALSE
cg25568091	chr2	113032874	113032875	ZC3H6	376940	-302	CGI	TRUE	FALSE	FALSE
cg25590579	chr2	45838450	45838451	SRBD1	55133	-16	CGI	TRUE	FALSE	FALSE
cg25618271	chr2	119532118	119532119	EN1	2019	73639	CGI	FALSE	FALSE	TRUE
cg25656144	chr2	28614171	28614172	FOSL2	2355	-1496	CGI	TRUE	TRUE	FALSE
cg25711575	chr2	178937477	178937478	PDE11A	50940	35587	CGI	TRUE	TRUE	FALSE
cg25793693	chr2	166810089	166810090	TTC21B	79809	257	CGI	FALSE	TRUE	FALSE
cg25804718	chr2	69870025	69870026	AAK1	22848	950	CGI-N-Shore	TRUE	TRUE	FALSE
cg25815054	chr2	165697978	165697979	COBLL1	22837	698	CGI	TRUE	TRUE	FALSE
cg25878063	chr2	159736477	159736478	DAPL1	92196	84647	CGI	FALSE	FALSE	TRUE
cg25928603	chr2	200323017	200323018	SATB2-AS1	150538	-9802	CGI	TRUE	TRUE	FALSE
cg25942789	chr2	241696788	241696789	KIF1A	547	62935	CGI	FALSE	TRUE	FALSE
cg25942990	chr2	177014996	177014997	MIR10B	406903	-33	CGI	TRUE	FALSE	FALSE
cg25950548	chr2	70475801	70475802	TIA1	7072	-21	CGI	TRUE	FALSE	FALSE
cg25953239	chr2	176982342	176982343	HOXD10	3236	849	CGI	FALSE	TRUE	FALSE
cg25976672	chr2	235907796	235907797	SH3BP4	23677	47167	CGI	FALSE	TRUE	FALSE
cg26009192	chr2	120282200	120282201	SCTR	6344	-171	CGI	TRUE	FALSE	FALSE
cg26012578	chr2	122125185	122125186	TFCP2L1	29842	-82406	Non-CGI	FALSE	TRUE	FALSE
cg26036375	chr2	122660039	122660040	TSN	7247	146917	Non-CGI	FALSE	FALSE	TRUE
cg26056277	chr2	166982925	166982926	SCN1A	6323	22715	Non-CGI	FALSE	TRUE	FALSE
cg26095658	chr2	71017887	71017888	FIGLA	344018	-111	CGI	TRUE	FALSE	FALSE
cg26097549	chr2	36582467	36582468	LOC100288911	100288911	244	CGI	TRUE	FALSE	FALSE
cg26127425	chr2	238382343	238382344	MLPH	79083	-12708	CGI-N-Shore	FALSE	FALSE	TRUE
cg26149275	chr2	176950007	176950008	EVX2	344191	-1316	CGI	TRUE	FALSE	FALSE
cg26153054	chr2	132152814	132152815	LOC389043	389043	-7658	CGI	FALSE	FALSE	TRUE
cg26154534	chr2	241076355	241076356	MYEOV2	150678	-590	CGI	TRUE	FALSE	FALSE
cg26267388	chr2	119591627	119591628	EN1	2019	14130	CGI	FALSE	FALSE	TRUE
cg26302994	chr2	44395983	44395984	PPM1B	5495	-15	CGI	TRUE	FALSE	FALSE
cg26359150	chr2	145281519	145281520	ZEB2-AS1	100303491	-3052	CGI	FALSE	FALSE	TRUE
cg26378982	chr2	11053937	11053938	KCNF1	3754	1873	CGI	TRUE	FALSE	FALSE
cg26467069	chr2	151344296	151344297	RND3	390	-86	CGI-S-Shore	TRUE	FALSE	FALSE
cg26500773	chr2	232646331	232646332	COPS7B	64708	-112	CGI	TRUE	FALSE	FALSE
cg26585007	chr2	112655072	112655073	MERTK	10461	-1117	CGI	TRUE	FALSE	FALSE
cg26627956	chr2	202004766	202004767	CFLAR-AS1	65072	17747	CGI	TRUE	TRUE	FALSE
cg26638005	chr2	131090049	131090050	CCDC115	84317	9871	CGI	FALSE	FALSE	TRUE
cg26641275	chr2	239971554	239971555	MIR4440	100616397	19054	CGI	FALSE	TRUE	FALSE
cg26645509	chr2	118944144	118944145	INSIG2	51141	98093	CGI	FALSE	FALSE	TRUE
cg26703456	chr2	226264821	226264822	NYAP2	57624	-779	Non-CGI	TRUE	FALSE	FALSE
cg26797073	chr2	131129811	131129812	PTPN18	26469	16230	CGI	TRUE	TRUE	FALSE
cg26855801	chr2	45176983	45176984	SIX3	6496	7945	CGI	FALSE	FALSE	TRUE
cg26890182	chr2	135621176	135621177	ACMSD	130013	24989	Non-CGI	FALSE	TRUE	FALSE
cg26983710	chr2	154728202	154728203	GALNT13	114805	-222	CGI	TRUE	FALSE	FALSE
cg27005255	chr2	198365139	198365140	HSPD1	3329	-140	CGI	TRUE	FALSE	FALSE
cg27139836	chr2	219868065	219868066	MIR375	494324	-1634	CGI	TRUE	TRUE	FALSE
cg27166649	chr2	182521528	182521529	CERKL	375298	23851	CGI	TRUE	TRUE	FALSE
cg27169860	chr2	66218712	66218713	MIR4778	100616464	366746	Non-CGI	FALSE	TRUE	FALSE
cg27211198	chr2	121776456	121776457	TFCP2L1	29842	266320	CGI	FALSE	FALSE	TRUE
cg27235690	chr2	55496390	55496391	MTIF2	4528	-5	CGI	TRUE	FALSE	FALSE
cg27242549	chr2	113012627	113012628	ZC3H8	84524	35	CGI	TRUE	FALSE	FALSE
cg27252970	chr2	220348312	220348313	GMPPA	29926	-15273	CGI	FALSE	TRUE	FALSE
cg27254442	chr2	176962284	176962285	HOXD12	3238	-2244	CGI	FALSE	FALSE	TRUE
cg27254871	chr2	206750458	206750459	INO80D	54891	200446	CGI-N-Shore	FALSE	FALSE	TRUE
cg27291468	chr2	9878816	9878817	TAF1B	9014	-104753	Non-CGI	FALSE	FALSE	TRUE
cg27403609	chr2	11101403	11101404	KCNF1	3754	49339	CGI	FALSE	FALSE	TRUE
cg27405400	chr2	127839539	127839540	BIN1	274	25362	CGI-N-Shelf	TRUE	TRUE	FALSE
cg27406975	chr2	172955512	172955513	DLX1	1745	5303	CGI	FALSE	FALSE	TRUE
cg27419327	chr2	241853823	241853824	C2orf54	79919	-18249	CGI	FALSE	FALSE	TRUE
cg27485108	chr2	26951130	26951131	KCNK3	3777	35548	CGI	FALSE	TRUE	FALSE
cg27533019	chr2	99553078	99553079	KIAA1211L	343990	-393	CGI	TRUE	FALSE	FALSE
cg27604702	chr2	233793088	233793089	C2orf82	389084	58093	CGI	TRUE	TRUE	FALSE
cg27664844	chr2	119532486	119532487	EN1	2019	73271	CGI	FALSE	FALSE	TRUE
cg00089486	chr3	157816330	157816331	SHOX2	6474	7620	CGI-S-Shore	FALSE	TRUE	FALSE
cg00099023	chr3	52189007	52189008	POC1A	25886	-300	CGI	TRUE	FALSE	FALSE
cg00186462	chr3	100401284	100401285	TFG	10342	-26848	CGI	FALSE	TRUE	FALSE
cg00323305	chr3	24537182	24537183	THRB	7068	-728	CGI	TRUE	FALSE	FALSE
cg00375819	chr3	11033866	11033867	SLC6A1	6529	-552	CGI-N-Shore	TRUE	FALSE	FALSE
cg00656387	chr3	40428638	40428639	ENTPD3	956	-33	CGI-N-Shore	TRUE	FALSE	FALSE
cg00735667	chr3	74663796	74663797	CNTN3	5067	-93452	CGI	FALSE	FALSE	TRUE
cg00744083	chr3	38648200	38648201	SCN5A	6331	42962	Non-CGI	TRUE	TRUE	FALSE
cg00813746	chr3	50275558	50275559	GNAI2	2771	11833	CGI	FALSE	TRUE	FALSE
cg00891242	chr3	157828165	157828166	RSRC1	51319	272	CGI	FALSE	TRUE	FALSE
cg00906762	chr3	148805118	148805119	HLTF	6596	-776	CGI	TRUE	FALSE	FALSE
cg00908291	chr3	140771786	140771787	SPSB4	92369	1042	CGI	FALSE	TRUE	FALSE
cg00968241	chr3	156543833	156543834	LEKR1	389170	-261	CGI-N-Shore	TRUE	FALSE	FALSE
cg00987743	chr3	49581113	49581114	BSN-AS2	100132677	10684	CGI-S-Shelf	FALSE	FALSE	TRUE
cg01005211	chr3	72338583	72338584	LOC201617	201617	138174	Non-CGI	FALSE	FALSE	TRUE
cg01079515	chr3	195576629	195576630	MUC4	4585	-37784	CGI	FALSE	FALSE	TRUE
cg01106145	chr3	43663861	43663862	ANO10	55129	-300	CGI	TRUE	FALSE	FALSE
cg01139553	chr3	193493033	193493034	OPA1	4976	182099	CGI-S-Shelf	FALSE	FALSE	TRUE
cg01296889	chr3	54122032	54122033	CACNA2D3	55799	-34659	CGI	FALSE	FALSE	TRUE
cg01336855	chr3	64673923	64673924	ADAMTS9	56999	-557	CGI	TRUE	TRUE	FALSE
cg01353464	chr3	38180116	38180117	MYD88	4615	146	CGI	TRUE	FALSE	FALSE
cg01376826	chr3	147129826	147129827	ZIC1	7545	2644	CGI	FALSE	TRUE	FALSE
cg01379240	chr3	138666144	138666145	C3orf72	401089	67	CGI	TRUE	FALSE	FALSE
cg01566555	chr3	125931744	125931745	ALDH1L1	10840	-32258	CGI-N-Shore	FALSE	FALSE	TRUE
cg01822130	chr3	96534005	96534006	EPHA6	285220	579	CGI	FALSE	TRUE	FALSE
cg01825295	chr3	147131617	147131618	ZIC1	7545	4435	CGI-S-Shore	FALSE	TRUE	FALSE
cg01845051	chr3	41361925	41361926	CTNNB1	1499	125523	Non-CGI	FALSE	TRUE	FALSE
cg01884537	chr3	9005400	9005401	RAD18	56852	-240	CGI	TRUE	FALSE	FALSE
cg01894743	chr3	133614786	133614787	RAB6B	51560	-94	CGI	TRUE	FALSE	FALSE
cg01896761	chr3	13590444	13590445	FBLN2	2199	16619	CGI-N-Shore	TRUE	TRUE	FALSE
cg01951420	chr3	121553821	121553822	IQCB1	9657	103	CGI	TRUE	FALSE	FALSE
cg02053257	chr3	10353648	10353649	SEC13	6396	9208	Non-CGI	FALSE	TRUE	FALSE
cg02056280	chr3	178866391	178866392	PIK3CA	5290	79	CGI	TRUE	TRUE	FALSE
cg02062140	chr3	169781664	169781665	GPR160	26996	25928	CGI	FALSE	TRUE	FALSE
cg02202980	chr3	119421868	119421869	MAATS1	89876	0	CGI-S-Shore	TRUE	FALSE	FALSE
cg02221302	chr3	62304629	62304630	PTPRG-AS1	100506994	-6	CGI	TRUE	FALSE	FALSE
cg02222844	chr3	48694451	48694452	MIR4793	100616112	-12737	CGI	FALSE	TRUE	FALSE
cg02231066	chr3	52567130	52567131	NT5DC2	64943	1961	CGI	FALSE	TRUE	FALSE
cg02253760	chr3	147077616	147077617	ZIC4	84107	46978	CGI-S-Shore	FALSE	FALSE	TRUE
cg02306995	chr3	122635049	122635050	LOC100129550	100129550	29688	CGI-S-Shelf	FALSE	TRUE	FALSE
cg02312542	chr3	126064371	126064372	KLF15	28999	11863	CGI-S-Shore	FALSE	TRUE	FALSE
cg02389617	chr3	186501375	186501376	EIF4A2	1974	13	CGI	TRUE	FALSE	FALSE
cg02398045	chr3	148804489	148804490	HLTF	6596	-147	CGI	TRUE	FALSE	FALSE
cg02504211	chr3	194815434	194815435	XXYLT1	152002	176459	CGI	FALSE	TRUE	FALSE
cg02567082	chr3	186080180	186080181	DGKG	1608	-156	CGI	TRUE	FALSE	FALSE
cg02569554	chr3	197280980	197280981	BDH1	622	19212	CGI-N-Shore	FALSE	TRUE	FALSE
cg02605996	chr3	148664754	148664755	GYG1	2992	-44439	CGI	FALSE	FALSE	TRUE
cg02627110	chr3	47823531	47823532	SMARCC1	6599	63	CGI	TRUE	FALSE	FALSE
cg02700891	chr3	129693586	129693587	TRH	7200	471	CGI	TRUE	FALSE	FALSE
cg02721516	chr3	122920941	122920942	SEC22A	26984	166	CGI	FALSE	TRUE	FALSE
cg02738081	chr3	184971844	184971845	EHHADH	1962	40	CGI	TRUE	FALSE	FALSE
cg02738677	chr3	133265129	133265130	CDV3	55573	-27303	Non-CGI	FALSE	FALSE	TRUE
cg02741226	chr3	118892305	118892306	UPK1B	7348	-118	Non-CGI	TRUE	FALSE	FALSE
cg02771240	chr3	193789377	193789378	HES1	3280	-64552	CGI-S-Shore	FALSE	FALSE	TRUE
cg02782426	chr3	40428986	40428987	ENTPD3	956	312	CGI	FALSE	TRUE	FALSE
cg02803925	chr3	195974300	195974301	SLC51A	200931	30916	CGI-S-Shelf	FALSE	TRUE	FALSE
cg02806645	chr3	138725153	138725154	PRR23A	729627	-42	CGI	TRUE	FALSE	FALSE
cg02858214	chr3	182400605	182400606	ATP11B	23200	-110684	CGI	FALSE	FALSE	TRUE
cg02930239	chr3	138763670	138763671	PRR23C	389152	62	CGI	TRUE	FALSE	FALSE
cg03385233	chr3	122785932	122785933	PDIA5	10954	75	CGI	TRUE	FALSE	FALSE
cg03414569	chr3	184971699	184971700	EHHADH	1962	185	CGI	TRUE	TRUE	FALSE
cg03540175	chr3	49236946	49236947	CCDC36	339834	1084	CGI	TRUE	TRUE	FALSE
cg03550219	chr3	25705846	25705847	MIR4442	100616477	582	CGI	TRUE	TRUE	FALSE
cg03556653	chr3	115231501	115231502	GAP43	2596	-110648	CGI	FALSE	FALSE	TRUE
cg03668835	chr3	17784171	17784172	TBC1D5	9779	67	CGI	TRUE	FALSE	FALSE
cg03670164	chr3	178789707	178789708	ZMAT3	64393	-50	CGI	TRUE	FALSE	FALSE
cg03679504	chr3	46621556	46621557	LRRC2	79442	14	CGI-S-Shelf	TRUE	TRUE	FALSE
cg03760927	chr3	100120682	100120683	TOMM70A	9868	-439	CGI	TRUE	FALSE	FALSE
cg03792947	chr3	107244719	107244720	BBX	56987	2935	CGI	FALSE	TRUE	FALSE
cg03802069	chr3	137482593	137482594	SOX14	8403	-539	CGI	TRUE	FALSE	FALSE
cg03862437	chr3	194353432	194353433	TMEM44	93109	984	CGI-S-Shore	FALSE	TRUE	FALSE
cg03863817	chr3	96495925	96495926	EPHA6	285220	-37498	CGI	FALSE	FALSE	TRUE
cg03881775	chr3	147111135	147111136	ZIC4	84107	13459	CGI	TRUE	TRUE	FALSE
cg03981074	chr3	183959062	183959063	MIR1224	100187716	-129	CGI-N-Shore	TRUE	TRUE	FALSE
cg03986829	chr3	62358234	62358235	FEZF2	55079	954	CGI	TRUE	TRUE	FALSE
cg03994820	chr3	350682	350683	CHL1	10752	112402	CGI	FALSE	TRUE	FALSE
cg04066019	chr3	16554466	16554467	RFTN1	23180	754	CGI	FALSE	TRUE	FALSE
cg04072910	chr3	129290078	129290079	H1FOO	132243	28020	CGI-S-Shore	FALSE	TRUE	FALSE
cg04222358	chr3	2140256	2140257	CNTN4	152330	-292	CGI	TRUE	FALSE	FALSE
cg04231050	chr3	133191297	133191298	BFSP2	8419	72506	CGI	FALSE	TRUE	FALSE
cg04231166	chr3	185655124	185655125	TRA2B	6434	798	CGI	TRUE	TRUE	FALSE
cg04322483	chr3	42544020	42544021	VIPR1	7433	13228	CGI	TRUE	TRUE	FALSE
cg04343162	chr3	196044948	196044949	TCTEX1D2	255758	215	CGI	TRUE	TRUE	FALSE
cg04412755	chr3	46939978	46939979	PTH1R	5745	20741	CGI	FALSE	TRUE	FALSE
cg04419871	chr3	197409435	197409436	MIR922	100126321	-7987	CGI	FALSE	TRUE	FALSE
cg04457317	chr3	50567932	50567933	CACNA2D2	9254	-27039	CGI	FALSE	FALSE	TRUE
cg04467162	chr3	128764824	128764825	GP9	2815	-14819	CGI	FALSE	FALSE	TRUE
cg04468081	chr3	182983386	182983387	B3GNT5	84002	12353	Non-CGI	FALSE	TRUE	FALSE
cg04469346	chr3	126373967	126373968	TXNRD3	114112	0	CGI	TRUE	FALSE	FALSE
cg04527018	chr3	126261298	126261299	C3orf22	152065	16458	CGI	FALSE	TRUE	FALSE
cg04537229	chr3	186545622	186545623	ADIPOQ	9370	-14839	CGI-S-Shore	FALSE	FALSE	TRUE
cg04554240	chr3	138170552	138170553	ESYT3	83850	17136	CGI-N-Shore	FALSE	TRUE	FALSE
cg04562217	chr3	79815718	79815719	ROBO1	6091	1339	CGI	FALSE	TRUE	FALSE
cg04602284	chr3	119422283	119422284	MAATS1	89876	413	CGI	FALSE	TRUE	FALSE
cg04614380	chr3	50192449	50192450	SEMA3F	6405	-397	CGI	TRUE	TRUE	FALSE
cg04678713	chr3	197236889	197236890	BDH1	622	63303	CGI	FALSE	TRUE	FALSE
cg04741853	chr3	44037189	44037190	MIR138-1	406929	-118513	CGI	FALSE	FALSE	TRUE
cg04791456	chr3	57505743	57505744	DNAH12	201625	24326	CGI	FALSE	TRUE	FALSE
cg04807594	chr3	148415747	148415748	AGTR1	185	88	CGI	TRUE	FALSE	FALSE
cg04808658	chr3	52470040	52470041	SEMA3G	56920	9001	Non-CGI	FALSE	TRUE	FALSE
cg04888849	chr3	9970020	9970021	CRELD1	78987	-5502	Non-CGI	TRUE	TRUE	FALSE
cg04924511	chr3	10334731	10334732	GHRL	51738	-99	Non-CGI	TRUE	TRUE	FALSE
cg04949981	chr3	46796026	46796027	PRSS46	100287362	-18104	CGI-S-Shelf	TRUE	TRUE	FALSE
cg05142211	chr3	181430485	181430486	SOX2	6657	772	CGI	TRUE	TRUE	FALSE
cg05147070	chr3	160283469	160283470	KPNA4	3840	-92	CGI	TRUE	FALSE	FALSE
cg05385623	chr3	57994101	57994102	FLNB	2317	-24	CGI	TRUE	FALSE	FALSE
cg05431334	chr3	25831755	25831756	OXSM	54995	191	CGI-S-Shore	TRUE	TRUE	FALSE
cg05452836	chr3	146262174	146262175	PLSCR1	5359	452	CGI	FALSE	TRUE	FALSE
cg05467012	chr3	12595696	12595697	MKRN2	23609	-2896	CGI	FALSE	FALSE	TRUE
cg05551922	chr3	49396232	49396233	GPX1	2876	-440	CGI	TRUE	FALSE	FALSE
cg05666842	chr3	126423272	126423273	CHCHD6	84303	153	CGI	FALSE	TRUE	FALSE
cg05677579	chr3	51976245	51976246	PARP3	10039	-114	CGI	TRUE	FALSE	FALSE
cg05726764	chr3	179399579	179399580	USP13	8975	28645	CGI	FALSE	TRUE	FALSE
cg05768427	chr3	127634188	127634189	KBTBD12	166348	-128	CGI	TRUE	FALSE	FALSE
cg05882938	chr3	186857284	186857285	RPL39L	116832	-20	CGI	TRUE	FALSE	FALSE
cg05983061	chr3	39544192	39544193	MOBP	4336	35121	CGI	FALSE	TRUE	FALSE
cg06150369	chr3	129118661	129118662	RPL32P3	132241	-378	CGI	TRUE	FALSE	FALSE
cg06371443	chr3	121949308	121949309	CASR	846	46777	CGI-S-Shore	FALSE	TRUE	FALSE
cg06508320	chr3	179660149	179660150	PEX5L	51555	94366	CGI-N-Shore	FALSE	TRUE	FALSE
cg06598836	chr3	2140699	2140700	CNTN4	152330	148	CGI	FALSE	TRUE	FALSE
cg06637517	chr3	52407344	52407345	BAP1	8314	36663	CGI	FALSE	TRUE	FALSE
cg06651450	chr3	32860909	32860910	TRIM71	131405	1398	CGI	FALSE	TRUE	FALSE
cg06698795	chr3	126260615	126260616	C3orf22	152065	17141	CGI	FALSE	TRUE	FALSE
cg06705862	chr3	128151236	128151237	DNAJB8-AS1	285224	-31199	CGI-N-Shore	FALSE	FALSE	TRUE
cg06825957	chr3	49591628	49591629	BSN-AS2	100132677	169	CGI	TRUE	FALSE	FALSE
cg06842518	chr3	197476315	197476316	FYTTD1	84248	-107	CGI	TRUE	FALSE	FALSE
cg07079407	chr3	122233852	122233853	KPNA1	3836	-65	CGI	TRUE	FALSE	FALSE
cg07099588	chr3	126006495	126006496	KLF15	28999	69739	CGI-N-Shore	FALSE	FALSE	TRUE
cg07225362	chr3	9975367	9975368	CRELD1	78987	-155	CGI	TRUE	TRUE	FALSE
cg07248043	chr3	125314337	125314338	OSBPL11	114885	42	CGI	TRUE	FALSE	FALSE
cg07330230	chr3	125899925	125899926	ALDH1L1	10840	-439	CGI	TRUE	TRUE	FALSE
cg07351192	chr3	5137773	5137774	ARL8B	55207	-26155	CGI	FALSE	FALSE	TRUE
cg07448319	chr3	40547217	40547218	ZNF620	253639	-311	CGI-N-Shore	TRUE	FALSE	FALSE
cg07552157	chr3	142720316	142720317	LOC100289361	100289361	-6	CGI	TRUE	FALSE	FALSE
cg07580707	chr3	14220061	14220062	XPC	7508	109	CGI	TRUE	FALSE	FALSE
cg07638884	chr3	77088763	77088764	ROBO2	6092	1102117	CGI	TRUE	TRUE	FALSE
cg07693931	chr3	158449734	158449735	RARRES1	5918	539	CGI	FALSE	TRUE	FALSE
cg07696485	chr3	36986642	36986643	TRANK1	9881	-93	CGI	TRUE	FALSE	FALSE
cg07755390	chr3	124931736	124931737	SLC12A8	84561	66353	CGI	TRUE	TRUE	FALSE
cg07805480	chr3	195544580	195544581	MUC4	4585	-5735	CGI-N-Shore	FALSE	FALSE	TRUE
cg07805699	chr3	159481815	159481816	IL12A	3592	-224806	CGI	TRUE	TRUE	FALSE
cg07851808	chr3	14988835	14988836	NR2C2	7182	-399	CGI	TRUE	TRUE	FALSE
cg07865967	chr3	5028809	5028810	BHLHE40-AS1	100507582	-7162	CGI	FALSE	FALSE	TRUE
cg07889826	chr3	50127152	50127153	RBM5	10181	810	CGI-S-Shore	FALSE	TRUE	FALSE
cg08049060	chr3	50396974	50396975	TMEM115	11070	-34	CGI	TRUE	FALSE	FALSE
cg08154107	chr3	183994073	183994074	CAMK2N2	94032	-14821	CGI	TRUE	TRUE	FALSE
cg08162476	chr3	13064001	13064002	IQSEC1	9922	50614	Non-CGI	FALSE	TRUE	FALSE
cg08216768	chr3	127175552	127175553	TPRA1	131601	134014	CGI	FALSE	FALSE	TRUE
cg08281123	chr3	19791304	19791305	EFHB	151651	197195	CGI	FALSE	FALSE	TRUE
cg08421685	chr3	238611	238612	CHL1	10752	331	CGI	TRUE	FALSE	FALSE
cg08443605	chr3	24872319	24872320	MIR4792	100616448	-309392	CGI	FALSE	FALSE	TRUE
cg08519233	chr3	105085521	105085522	ALCAM	214	-34	CGI	TRUE	FALSE	FALSE
cg08668199	chr3	127795571	127795572	SEC61A1	29927	24358	CGI	FALSE	TRUE	FALSE
cg08828664	chr3	149688512	149688513	PFN2	5217	227	CGI	TRUE	FALSE	FALSE
cg08887694	chr3	53880378	53880379	CHDH	55349	40	CGI	TRUE	FALSE	FALSE
cg08888203	chr3	10149979	10149980	FANCD2OS	115795	-63	CGI	TRUE	FALSE	FALSE
cg08942682	chr3	197409980	197409981	MIR922	100126321	-8532	CGI	FALSE	TRUE	FALSE
cg08978399	chr3	194835888	194835889	XXYLT1	152002	156005	CGI	FALSE	TRUE	FALSE
cg09000779	chr3	136867925	136867926	IL20RB	53833	191217	Non-CGI	FALSE	FALSE	TRUE
cg09024340	chr3	55520476	55520477	WNT5A	7474	853	CGI	FALSE	TRUE	FALSE
cg09221314	chr3	69063234	69063235	EOGT	285203	-459	CGI-S-Shore	TRUE	FALSE	FALSE
cg09342567	chr3	178979013	178979014	KCNMB3	27094	5823	CGI	TRUE	TRUE	FALSE
cg09435674	chr3	46933864	46933865	PTH1R	5745	14627	CGI	FALSE	TRUE	FALSE
cg09475741	chr3	42577716	42577717	VIPR1	7433	46924	CGI	FALSE	TRUE	FALSE
cg09618015	chr3	183959073	183959074	MIR1224	100187716	-118	CGI-N-Shore	TRUE	TRUE	FALSE
[truncated: 44,765 more rows]
