# Supplementary material for: H3K4me1 marks DNA regions hypomethylated during aging in human stem and differentiated cells
Source: HighWire-hosted journal article supplement (doi:10.1101/gr.169011.113), 2014-09-30
Supplement: Supplemental_Table_15.xlsx [file Supplemental_Table_15.xlsx]

## Sheet: ST15
Supplemental Table 15: List of CpG sites where the increase in Euclidean distance (ED) (> 2-fold) with age was higher than could be accounted for solely by interindividual variability
Target ID	Chromosome	start	end	nearest.gene	nearest.gene.id	disttotss	hmm.cpgi	prom.reg	intra.reg	inter.reg
cg00001583	chr1	200011786	200011787	NR5A2	2494	15015	CGI	TRUE	TRUE	FALSE
cg00007036	chr1	33742089	33742090	ZNF362	149076	19914	CGI	FALSE	TRUE	FALSE
cg00026222	chr1	2144244	2144245	C1orf86	199990	-5071	CGI	FALSE	FALSE	TRUE
cg00069860	chr1	44883227	44883228	RNF220	55182	12266	CGI	FALSE	TRUE	FALSE
cg00173141	chr1	210466172	210466173	HHAT	55733	-35422	CGI	FALSE	FALSE	TRUE
cg00256155	chr1	47915647	47915648	FOXD2	2306	13957	CGI	FALSE	FALSE	TRUE
cg00345792	chr1	27877772	27877773	AHDC1	27245	52587	CGI	TRUE	TRUE	FALSE
cg00349061	chr1	26371865	26371866	SLC30A2	7780	737	CGI-N-Shore	FALSE	TRUE	FALSE
cg00397635	chr1	53309162	53309163	ZYG11A	440590	978	CGI	FALSE	TRUE	FALSE
cg00418071	chr1	86073001	86073002	CYR61	3491	26556	Non-CGI	FALSE	FALSE	TRUE
cg00426822	chr1	39546536	39546537	MACF1	23499	-551	CGI-N-Shore	TRUE	FALSE	FALSE
cg00565688	chr1	3568212	3568213	TP73	7161	-915	CGI	TRUE	FALSE	FALSE
cg00691240	chr1	52498502	52498503	KTI12	112970	968	CGI	TRUE	TRUE	FALSE
cg00754103	chr1	165910821	165910822	MIR3658	100500832	33662	CGI	FALSE	FALSE	TRUE
cg00764612	chr1	150255213	150255214	C1orf51	148523	259	CGI	TRUE	TRUE	FALSE
cg00772714	chr1	15479360	15479361	TMEM51	55092	331	CGI	TRUE	TRUE	FALSE
cg00812299	chr1	61508853	61508854	NFIA	4774	-34091	CGI	FALSE	FALSE	TRUE
cg00894697	chr1	20826246	20826247	MUL1	79594	8426	CGI-N-Shore	FALSE	TRUE	FALSE
cg00929392	chr1	19283191	19283192	IFFO2	126917	-364	CGI	TRUE	FALSE	FALSE
cg00951395	chr1	232941775	232941776	MAP10	54627	1136	CGI-S-Shore	TRUE	FALSE	FALSE
cg00959725	chr1	33282965	33282966	S100PBP	64766	-76	CGI	TRUE	FALSE	FALSE
cg00970752	chr1	15711443	15711444	EFHD2	79180	-24946	Non-CGI	FALSE	TRUE	FALSE
cg00987080	chr1	32930837	32930838	ZBTB8A	653121	178	CGI	FALSE	TRUE	FALSE
cg00988148	chr1	179555635	179555636	TDRD5	163589	-5111	CGI	FALSE	FALSE	TRUE
cg01074657	chr1	78511466	78511467	GIPC2	54810	-121	CGI	TRUE	FALSE	FALSE
cg01079738	chr1	182922427	182922428	SHCBP1L	81626	124	CGI	TRUE	FALSE	FALSE
cg01134183	chr1	46860260	46860261	FAAH	2166	320	CGI	FALSE	TRUE	FALSE
cg01398941	chr1	55271902	55271903	C1orf177	163747	165	CGI	FALSE	TRUE	FALSE
cg01444643	chr1	55504848	55504849	PCSK9	255738	-299	CGI-N-Shore	TRUE	FALSE	FALSE
cg01550055	chr1	119543216	119543217	TBX15	6913	-11036	CGI	FALSE	FALSE	TRUE
cg01728493	chr1	17866589	17866590	ARHGEF10L	55160	258	CGI	FALSE	TRUE	FALSE
cg01782790	chr1	163393050	163393051	NUF2	83540	101326	CGI-S-Shore	FALSE	FALSE	TRUE
cg01905589	chr1	26856408	26856409	RPS6KA1	6195	158	CGI	TRUE	FALSE	FALSE
cg01972394	chr1	19229528	19229529	ALDH4A1	8659	-234	CGI	TRUE	FALSE	FALSE
cg02296931	chr1	1144658	1144659	TNFRSF18	8784	-2568	CGI	FALSE	FALSE	TRUE
cg02356786	chr1	243265016	243265017	LOC731275	731275	28	CGI	TRUE	FALSE	FALSE
cg02448276	chr1	11845238	11845239	MTHFR	4524	20920	Non-CGI	FALSE	TRUE	FALSE
cg02572448	chr1	8763403	8763404	RERE	473	114294	CGI	FALSE	TRUE	FALSE
cg02574421	chr1	17306627	17306628	MFAP2	4237	1452	CGI	FALSE	TRUE	FALSE
cg02586249	chr1	45452521	45452522	EIF2B3	8891	-159	CGI-S-Shore	TRUE	FALSE	FALSE
cg02620307	chr1	161283965	161283966	SDHC	6391	-199	CGI	TRUE	FALSE	FALSE
cg02633690	chr1	235667903	235667904	B3GALNT2	148789	-121	CGI	TRUE	FALSE	FALSE
cg02892286	chr1	214153377	214153378	PROX1	5629	-7907	CGI	FALSE	FALSE	TRUE
cg02927682	chr1	54844424	54844425	SSBP3	23648	27666	Non-CGI	FALSE	TRUE	FALSE
cg02928797	chr1	6566337	6566338	PLEKHG5	57449	13730	CGI	FALSE	TRUE	FALSE
cg02933679	chr1	13910224	13910225	PDPN	10630	-26	CGI	TRUE	FALSE	FALSE
cg02935904	chr1	55267293	55267294	TTC22	55001	-351	CGI-S-Shore	TRUE	FALSE	FALSE
cg02974126	chr1	10092691	10092692	UBE4B	10277	-348	CGI	TRUE	FALSE	FALSE
cg03075534	chr1	240161447	240161448	RPS7P5	645884	-9375	CGI	FALSE	FALSE	TRUE
cg03112680	chr1	178063192	178063193	RASAL2-AS1	100302401	-63	CGI	TRUE	FALSE	FALSE
cg03130248	chr1	245524538	245524539	KIF26B	55083	206250	CGI	FALSE	TRUE	FALSE
cg03132197	chr1	28696105	28696106	PHACTR4	65979	11	CGI-N-Shore	TRUE	FALSE	FALSE
cg03189756	chr1	241803820	241803821	OPN3	23596	-118	CGI	TRUE	FALSE	FALSE
cg03254465	chr1	3240227	3240228	ARHGEF16	27237	-130918	CGI	FALSE	TRUE	FALSE
cg03397389	chr1	36397003	36397004	2003-08-01	192669	683	CGI	TRUE	TRUE	FALSE
cg03425468	chr1	155164676	155164677	MIR92B	693235	-290	CGI	TRUE	FALSE	FALSE
cg03525385	chr1	112438746	112438747	KCND3	3752	93029	CGI	FALSE	TRUE	FALSE
cg03526459	chr1	146549940	146549941	LOC728989	728989	-35340	CGI	TRUE	FALSE	FALSE
cg03526503	chr1	28198483	28198484	THEMIS2	9473	-570	CGI-N-Shore	TRUE	FALSE	FALSE
cg03530210	chr1	109584673	109584674	WDR47	22911	175	CGI	TRUE	FALSE	FALSE
cg03763387	chr1	182808220	182808221	DHX9	1660	-217	CGI	TRUE	FALSE	FALSE
cg03769939	chr1	25254129	25254130	RUNX3	864	37481	CGI-N-Shore	FALSE	TRUE	FALSE
cg03771099	chr1	1917911	1917912	KIAA1751	85452	17363	CGI-S-Shore	FALSE	TRUE	FALSE
cg03984347	chr1	45190262	45190263	KIF2C	11004	-15226	CGI	FALSE	TRUE	FALSE
cg03987199	chr1	29189655	29189656	EPB41	2035	-23946	CGI	FALSE	TRUE	FALSE
cg04012515	chr1	1911386	1911387	KIAA1751	85452	23888	CGI	FALSE	TRUE	FALSE
cg04025150	chr1	34642862	34642863	C1orf94	84970	10237	CGI	TRUE	TRUE	FALSE
cg04028570	chr1	248100427	248100428	OR2L13	284521	-64	CGI	TRUE	FALSE	FALSE
cg04078980	chr1	228291486	228291487	C1orf35	79169	-463	CGI-S-Shore	TRUE	FALSE	FALSE
cg04102734	chr1	209406725	209406726	MIR205HG	642587	-195441	CGI	FALSE	FALSE	TRUE
cg04138112	chr1	167090618	167090619	DUSP27	92235	26546	CGI-N-Shore	FALSE	TRUE	FALSE
cg04312406	chr1	226497240	226497241	LIN9	286826	314	CGI	TRUE	TRUE	FALSE
cg04400972	chr1	117665053	117665054	TRIM45	80263	-641	CGI	TRUE	FALSE	FALSE
cg04484550	chr1	2980163	2980164	FLJ42875	440556	185	CGI	TRUE	FALSE	FALSE
cg04486873	chr1	34644252	34644253	C1orf94	84970	11627	CGI-S-Shore	FALSE	TRUE	FALSE
cg04501188	chr1	47904171	47904172	FOXD2	2306	2481	CGI	TRUE	FALSE	FALSE
cg04510788	chr1	37498900	37498901	GRIK3	2899	942	CGI	FALSE	TRUE	FALSE
cg04552470	chr1	20669792	20669793	VWA5B1	127731	52379	CGI	FALSE	TRUE	FALSE
cg04703227	chr1	19923504	19923505	C1orf151-NBL1	100532736	32	CGI	TRUE	FALSE	FALSE
cg04780572	chr1	111097901	111097902	KCNA10	3744	-36103	CGI-N-Shore	FALSE	FALSE	TRUE
cg04850059	chr1	225883161	225883162	ENAH	55740	-42315	Non-CGI	FALSE	FALSE	TRUE
cg04865841	chr1	3566992	3566993	WRAP73	49856	-320	CGI-S-Shore	TRUE	FALSE	FALSE
cg04867733	chr1	77747987	77747988	AK5	26289	324	CGI	TRUE	FALSE	FALSE
cg04897742	chr1	16085148	16085149	FBLIM1	54751	1993	CGI	TRUE	TRUE	FALSE
cg04916289	chr1	53704498	53704499	LOC100507564	100507564	215	CGI	TRUE	FALSE	FALSE
cg04935181	chr1	47133953	47133954	ATPAF1	64756	144	CGI	TRUE	TRUE	FALSE
cg04990202	chr1	153581750	153581751	S100A16	140576	3762	Non-CGI	TRUE	TRUE	FALSE
cg05340578	chr1	234634996	234634997	TARBP1	6894	-20146	Non-CGI	FALSE	FALSE	TRUE
cg05388840	chr1	41981911	41981912	EDN2	1907	-31566	CGI-N-Shore	FALSE	TRUE	FALSE
cg05445839	chr1	27023088	27023089	ARID1A	8289	565	CGI	TRUE	FALSE	FALSE
cg05523370	chr1	150293897	150293898	PRPF3	9129	-29	CGI	TRUE	FALSE	FALSE
cg05594095	chr1	6476916	6476917	HES2	54626	7812	CGI-N-Shelf	FALSE	TRUE	FALSE
cg05637536	chr1	154475068	154475069	TDRD10	126668	372	CGI	TRUE	FALSE	FALSE
cg05650453	chr1	7432644	7432645	VAMP3	9341	-398683	Non-CGI	FALSE	TRUE	FALSE
cg05656688	chr1	25254088	25254089	RUNX3	864	37522	CGI-N-Shore	FALSE	TRUE	FALSE
cg05725080	chr1	244615276	244615277	ADSS	159	158	CGI	TRUE	FALSE	FALSE
cg05797770	chr1	16470667	16470668	EPHA2	1969	11913	CGI-N-Shore	FALSE	TRUE	FALSE
cg05921170	chr1	153346191	153346192	S100A12	6283	1882	Non-CGI	FALSE	TRUE	FALSE
cg05930400	chr1	36273677	36273678	2004-08-01	192670	-149	CGI	TRUE	FALSE	FALSE
cg05947402	chr1	110052352	110052353	AMIGO1	57463	-15	CGI	TRUE	FALSE	FALSE
cg05955287	chr1	54303980	54303981	TMEM48	55706	243	CGI	TRUE	FALSE	FALSE
cg05962079	chr1	2428333	2428334	PLCH2	9651	20578	CGI	TRUE	TRUE	FALSE
cg05968270	chr1	65533502	65533503	MIR101-1	406893	-9310	CGI	FALSE	FALSE	TRUE
cg06092702	chr1	163392909	163392910	NUF2	83540	101185	CGI	FALSE	FALSE	TRUE
cg06201907	chr1	113249974	113249975	RHOC	389	49	CGI	TRUE	FALSE	FALSE
cg06205922	chr1	1473141	1473142	TMEM240	339453	2597	CGI-S-Shore	FALSE	TRUE	FALSE
cg06216400	chr1	155161161	155161162	MUC1	4582	1543	CGI	TRUE	TRUE	FALSE
cg06320401	chr1	48176755	48176756	FOXD2	2306	275065	CGI	FALSE	FALSE	TRUE
cg06346974	chr1	65775059	65775060	DNAJC6	9829	54910	CGI	TRUE	TRUE	FALSE
cg06350097	chr1	161474970	161474971	FCGR2A	2212	-233	Non-CGI	TRUE	FALSE	FALSE
cg06359703	chr1	41847297	41847298	EDN2	1907	103045	CGI-N-Shore	FALSE	FALSE	TRUE
cg06368558	chr1	26735884	26735885	LIN28A	79727	-1383	CGI-S-Shore	TRUE	FALSE	FALSE
cg06443533	chr1	1182424	1182425	FAM132A	388581	-321	CGI	TRUE	FALSE	FALSE
cg06444282	chr1	20669975	20669976	VWA5B1	127731	52562	CGI	FALSE	TRUE	FALSE
cg06641388	chr1	12655240	12655241	DHRS3	9249	22578	CGI-N-Shore	FALSE	TRUE	FALSE
cg06645033	chr1	50890678	50890679	DMRTA2	63950	-1558	CGI	TRUE	FALSE	FALSE
cg06750897	chr1	164545553	164545554	PBX1	5087	16955	CGI	FALSE	TRUE	FALSE
cg06772309	chr1	17571896	17571897	PADI3	51702	-3695	CGI-S-Shelf	FALSE	TRUE	FALSE
cg06909773	chr1	22151328	22151329	LDLRAD2	401944	12569	CGI-S-Shore	FALSE	TRUE	FALSE
cg06925975	chr1	23946267	23946268	MDS2	259283	38281	CGI	FALSE	TRUE	FALSE
cg06935598	chr1	211433485	211433486	RCOR3	55758	776	CGI	TRUE	TRUE	FALSE
cg06966242	chr1	4832432	4832433	AJAP1	55966	117326	CGI	FALSE	TRUE	FALSE
cg06978943	chr1	984992	984993	RNF223	401934	24693	CGI	FALSE	TRUE	FALSE
cg06995880	chr1	61516444	61516445	NFIA	4774	-26500	CGI	FALSE	FALSE	TRUE
cg07008784	chr1	205498551	205498552	CDK18	5129	24866	CGI	FALSE	TRUE	FALSE
cg07104388	chr1	110091050	110091051	GNAI3	2773	-134	CGI	TRUE	FALSE	FALSE
cg07105891	chr1	21031312	21031313	KIF17	57576	13003	CGI	FALSE	TRUE	FALSE
cg07105947	chr1	35586588	35586589	ZMYM1	79830	41615	CGI	FALSE	FALSE	TRUE
cg07114770	chr1	144932136	144932137	LOC653513	653513	107854	CGI	TRUE	TRUE	FALSE
cg07149609	chr1	170630734	170630735	PRRX1	5396	-2577	CGI	FALSE	FALSE	TRUE
cg07155336	chr1	107683775	107683776	NTNG1	22854	1145	CGI	FALSE	TRUE	FALSE
cg07209987	chr1	10221203	10221204	KIF1B	23095	-49559	Non-CGI	FALSE	TRUE	FALSE
cg07309943	chr1	236445064	236445065	ERO1LB	56605	273	CGI	TRUE	FALSE	FALSE
cg07367434	chr1	40781135	40781136	COL9A2	1298	1923	CGI	FALSE	TRUE	FALSE
cg07382920	chr1	3567646	3567647	WRAP73	49856	-974	CGI	TRUE	FALSE	FALSE
cg07536847	chr1	18957232	18957233	PAX7	5081	-266	CGI	TRUE	FALSE	FALSE
cg07576219	chr1	55012408	55012409	ACOT11	26027	4477	CGI-S-Shelf	TRUE	TRUE	FALSE
cg07599786	chr1	201618654	201618655	NAV1	89796	1203	CGI	FALSE	TRUE	FALSE
cg07605211	chr1	223538359	223538360	SUSD4	55061	-814	CGI	TRUE	FALSE	FALSE
cg07719898	chr1	200274728	200274729	LINC00862	554279	68190	CGI-S-Shelf	FALSE	FALSE	TRUE
cg07789132	chr1	164290751	164290752	PBX1	5087	-237844	CGI	FALSE	FALSE	TRUE
cg07799314	chr1	159899530	159899531	TAGLN2	8407	-4245	CGI	TRUE	TRUE	FALSE
cg07821364	chr1	2411137	2411138	PLCH2	9651	3382	CGI	TRUE	TRUE	FALSE
cg07836663	chr1	2066167	2066168	C1orf86	199990	73003	CGI	FALSE	TRUE	FALSE
cg07952381	chr1	23040723	23040724	EPHB2	2048	3391	CGI-S-Shore	FALSE	TRUE	FALSE
cg07953201	chr1	245851802	245851803	KIF26B	55083	533514	CGI	FALSE	TRUE	FALSE
cg07970040	chr1	9789165	9789166	C1orf200	644997	-74520	CGI	FALSE	TRUE	FALSE
cg08008854	chr1	146643751	146643752	PRKAB2	5565	376	CGI	FALSE	TRUE	FALSE
cg08121652	chr1	48381824	48381825	TRABD2B	388630	80736	Non-CGI	FALSE	TRUE	FALSE
cg08146977	chr1	31628259	31628260	NKAIN1	79570	84473	CGI	FALSE	FALSE	TRUE
cg08231697	chr1	157165335	157165336	ETV3	2117	-56951	CGI	FALSE	FALSE	TRUE
cg08231710	chr1	1566687	1566688	MMP23B	8510	-871	CGI	TRUE	FALSE	FALSE
cg08272731	chr1	75602167	75602168	LHX8	431707	8047	CGI	FALSE	TRUE	FALSE
cg08274380	chr1	109419600	109419601	GPSM2	29899	-1	CGI	TRUE	TRUE	FALSE
cg08655686	chr1	38100087	38100088	RSPO1	284654	506	CGI	FALSE	TRUE	FALSE
cg08709360	chr1	1003376	1003377	RNF223	401934	6309	CGI	FALSE	FALSE	TRUE
cg08709672	chr1	206224334	206224335	AVPR1B	553	50	CGI-S-Shore	TRUE	FALSE	FALSE
cg08845123	chr1	62784332	62784333	KANK4	163782	749	CGI	FALSE	TRUE	FALSE
cg08845439	chr1	151512945	151512946	TUFT1	7286	163	CGI	FALSE	TRUE	FALSE
cg08867825	chr1	102312608	102312609	DNAJA1P5	94236	-24957	Non-CGI	TRUE	TRUE	FALSE
cg08881871	chr1	228503693	228503694	TRIM11	81559	90822	CGI	FALSE	TRUE	FALSE
cg08926642	chr1	7887455	7887456	PER3	8863	43074	CGI	FALSE	TRUE	FALSE
cg08926982	chr1	10270439	10270440	KIF1B	23095	-323	CGI	TRUE	FALSE	FALSE
cg09030189	chr1	202163291	202163292	LGR6	59352	172	CGI	TRUE	FALSE	FALSE
cg09106903	chr1	217309568	217309569	ESRRG	2104	1527	CGI	FALSE	TRUE	FALSE
cg09117878	chr1	109289049	109289050	STXBP3	6814	-234	CGI-N-Shore	TRUE	FALSE	FALSE
cg09144608	chr1	2098929	2098930	C1orf86	199990	40241	CGI-S-Shore	TRUE	TRUE	FALSE
cg09166705	chr1	151170883	151170884	PIP5K1A	8394	-136	CGI	TRUE	FALSE	FALSE
cg09182724	chr1	193075640	193075641	GLRX2	51022	-395	CGI-S-Shore	TRUE	FALSE	FALSE
cg09223698	chr1	218497686	218497687	TGFB2	7042	-20988	CGI-N-Shore	FALSE	TRUE	FALSE
cg09232430	chr1	21616825	21616826	LOC100506801	100506801	-2956	CGI	TRUE	TRUE	FALSE
cg09662920	chr1	78511433	78511434	GIPC2	54810	-154	CGI	TRUE	FALSE	FALSE
cg09763175	chr1	57110722	57110723	PRKAA2	5563	-266	CGI	TRUE	FALSE	FALSE
cg09796501	chr1	26233435	26233436	STMN1	3925	-66	CGI	TRUE	FALSE	FALSE
cg09807229	chr1	179051699	179051700	TOR3A	64222	586	CGI	FALSE	TRUE	FALSE
cg09824328	chr1	43425412	43425413	SLC2A1	6513	-564	CGI-S-Shore	TRUE	TRUE	FALSE
cg09871695	chr1	227506513	227506514	CDC42BPA	8476	-686	CGI	TRUE	FALSE	FALSE
cg09897416	chr1	149859252	149859253	HIST2H2AB	317772	212	CGI	TRUE	FALSE	FALSE
cg10014674	chr1	33430585	33430586	RNF19B	127544	-298	CGI-S-Shore	TRUE	FALSE	FALSE
cg10196558	chr1	155043921	155043922	LOC100505666	100505666	-7453	CGI	FALSE	TRUE	FALSE
cg10207181	chr1	147801090	147801091	PPIAL4B	653505	154327	CGI-N-Shore	TRUE	TRUE	FALSE
cg10210571	chr1	231664364	231664365	TSNAX-DISC1	100303453	-33	CGI	TRUE	FALSE	FALSE
cg10211861	chr1	59762176	59762177	FGGY	55277	-447	CGI	TRUE	FALSE	FALSE
cg10387458	chr1	93645817	93645818	TMED5	50999	427	CGI	TRUE	FALSE	FALSE
cg10620434	chr1	5586357	5586358	MIR4417	100616489	-37772	CGI	FALSE	FALSE	TRUE
cg10636760	chr1	2904595	2904596	ACTRT2	140625	-33449	Non-CGI	FALSE	FALSE	TRUE
cg10785099	chr1	200969816	200969817	KIF21B	23046	23010	CGI	FALSE	TRUE	FALSE
cg10827434	chr1	84944976	84944977	RPF1	80135	55	CGI	TRUE	FALSE	FALSE
cg10839663	chr1	113261613	113261614	FAM19A3	284467	-1574	CGI	TRUE	FALSE	FALSE
cg10951786	chr1	104068603	104068604	RNPC3	55599	24	CGI	TRUE	FALSE	FALSE
cg10963061	chr1	158147729	158147730	CD1D	912	-2006	CGI	FALSE	FALSE	TRUE
cg10983617	chr1	978664	978665	AGRN	375790	23160	CGI-S-Shore	FALSE	TRUE	FALSE
cg10992267	chr1	82268588	82268589	LPHN2	23266	496742	CGI	FALSE	TRUE	FALSE
cg11222217	chr1	10732519	10732520	CASZ1	54897	124186	CGI-N-Shore	FALSE	TRUE	FALSE
cg11235152	chr1	67600687	67600688	C1orf141	400757	-33	CGI	TRUE	FALSE	FALSE
cg11235921	chr1	917819	917820	C1orf170	84808	-345	CGI	TRUE	FALSE	FALSE
cg11390151	chr1	2387810	2387811	PLCH2	9651	-19942	CGI	FALSE	FALSE	TRUE
cg11414913	chr1	2799662	2799663	TTC34	100287898	-93431	CGI	FALSE	FALSE	TRUE
cg11428724	chr1	18957632	18957633	PAX7	5081	131	CGI	TRUE	FALSE	FALSE
cg11523538	chr1	244013970	244013971	AKT3	10000	-7083	CGI	FALSE	FALSE	TRUE
cg11524235	chr1	33351587	33351588	HPCA	3208	-509	CGI-N-Shore	TRUE	FALSE	FALSE
cg11528995	chr1	117210575	117210576	IGSF3	3321	-260	CGI	TRUE	FALSE	FALSE
cg11574055	chr1	117077116	117077117	CD58	965	36597	CGI	FALSE	TRUE	FALSE
cg11574975	chr1	112058304	112058305	RAP1A	5906	-26749	CGI	FALSE	TRUE	FALSE
cg11589139	chr1	229567139	229567140	ACTA1	58	2702	CGI-N-Shore	FALSE	TRUE	FALSE
cg11666087	chr1	49242513	49242514	BEND5	79656	32	CGI	TRUE	TRUE	FALSE
cg11688696	chr1	155052192	155052193	LOC100505666	100505666	-15724	CGI	FALSE	TRUE	FALSE
cg11706999	chr1	249105862	249105863	SH3BP5L	80851	14290	CGI-N-Shore	FALSE	TRUE	FALSE
cg11715828	chr1	44884150	44884151	RNF220	55182	13189	CGI-S-Shore	FALSE	TRUE	FALSE
cg11717597	chr1	156046546	156046547	MEX3A	92312	5241	CGI	FALSE	TRUE	FALSE
cg11723801	chr1	156646485	156646486	NES	10763	702	CGI	TRUE	FALSE	FALSE
cg11819639	chr1	202311208	202311209	UBE2T	29089	-113	CGI	TRUE	FALSE	FALSE
cg11831004	chr1	52834260	52834261	CC2D1B	200014	-2382	CGI	FALSE	FALSE	TRUE
cg12081443	chr1	4037236	4037237	LOC728716	728716	36563	CGI	FALSE	FALSE	TRUE
cg12097325	chr1	1076431	1076432	LOC254099	254099	4033	CGI	FALSE	TRUE	FALSE
cg12140144	chr1	2984275	2984276	FLJ42875	440556	12	CGI	TRUE	FALSE	FALSE
cg12141340	chr1	19890415	19890416	C1orf151-NBL1	100532736	-33054	Non-CGI	FALSE	FALSE	TRUE
cg12167830	chr1	57111108	57111109	PRKAA2	5563	117	CGI	TRUE	FALSE	FALSE
cg12222949	chr1	184005360	184005361	GLT25D2	23127	1516	CGI-N-Shore	FALSE	TRUE	FALSE
cg12404281	chr1	165414806	165414807	RXRG	6258	-213	CGI-S-Shore	TRUE	FALSE	FALSE
cg12406825	chr1	117452407	117452408	PTGFRN	5738	-280	CGI	TRUE	FALSE	FALSE
cg12417362	chr1	201617355	201617356	NAV1	89796	-93	CGI	TRUE	FALSE	FALSE
cg12473697	chr1	2205770	2205771	SKI	6497	45635	CGI-S-Shore	FALSE	TRUE	FALSE
cg12485685	chr1	63384921	63384922	ATG4C	84938	135143	Non-CGI	FALSE	FALSE	TRUE
cg12601945	chr1	18958924	18958925	PAX7	5081	1423	CGI	FALSE	TRUE	FALSE
cg12610519	chr1	16494002	16494003	EPHA2	1969	-11419	CGI-N-Shore	FALSE	FALSE	TRUE
cg12742432	chr1	27677860	27677861	SYTL1	84958	9376	CGI	FALSE	TRUE	FALSE
cg12751404	chr1	11866034	11866035	MTHFR	4524	124	CGI	TRUE	FALSE	FALSE
cg12754571	chr1	247694271	247694272	GCSAML-AS1	148824	-164	CGI	TRUE	TRUE	FALSE
cg12758973	chr1	247694275	247694276	GCSAML-AS1	148824	-168	CGI	TRUE	TRUE	FALSE
cg12768681	chr1	20879547	20879548	FAM43B	163933	614	CGI	TRUE	FALSE	FALSE
cg13067553	chr1	147782452	147782453	PPIAL4B	653505	172965	CGI	TRUE	TRUE	FALSE
cg13077490	chr1	10459573	10459574	PGD	5226	487	CGI	FALSE	TRUE	FALSE
cg13115616	chr1	17338059	17338060	ATP13A2	23400	362	CGI	FALSE	TRUE	FALSE
cg13184736	chr1	68299409	68299410	GNG12	55970	-253	CGI	TRUE	TRUE	FALSE
cg13207501	chr1	38470665	38470666	FHL3	2275	520	CGI	FALSE	TRUE	FALSE
cg13362546	chr1	1102960	1102961	MIR200A	406983	-281	CGI	TRUE	FALSE	FALSE
cg13455634	chr1	213823255	213823256	PROX1-AS1	100505832	316351	Non-CGI	FALSE	FALSE	TRUE
cg13460643	chr1	209848845	209848846	G0S2	50486	174	CGI	TRUE	FALSE	FALSE
cg13556604	chr1	203274688	203274689	BTG2	7832	23	CGI	TRUE	FALSE	FALSE
cg13697378	chr1	68512845	68512846	DIRAS3	9077	3634	CGI	TRUE	TRUE	FALSE
cg13803688	chr1	110610452	110610453	ALX3	257	2868	CGI	FALSE	TRUE	FALSE
cg13850606	chr1	229543554	229543555	ACTA1	58	26287	CGI	FALSE	FALSE	TRUE
cg13851144	chr1	6239475	6239476	CHD5	26038	717	CGI	FALSE	TRUE	FALSE
cg13857689	chr1	26672613	26672614	AIM1L	55057	8006	Non-CGI	FALSE	TRUE	FALSE
cg13892954	chr1	57110867	57110868	PRKAA2	5563	-121	CGI	TRUE	FALSE	FALSE
cg13912858	chr1	109939840	109939841	SORT1	6272	721	CGI-N-Shore	FALSE	TRUE	FALSE
cg13931925	chr1	179545216	179545217	NPHS2	7827	-131	CGI	TRUE	FALSE	FALSE
cg13950210	chr1	45452319	45452320	EIF2B3	8891	40	CGI	TRUE	FALSE	FALSE
cg14015211	chr1	223315766	223315767	TLR5	7100	856	CGI-N-Shore	FALSE	TRUE	FALSE
cg14034757	chr1	209759145	209759146	CAMK1G	57172	2099	CGI	FALSE	TRUE	FALSE
cg14083421	chr1	7122639	7122640	CAMTA1	23261	277254	CGI	FALSE	TRUE	FALSE
cg14089881	chr1	6296630	6296631	ICMT	23463	-585	CGI-S-Shore	TRUE	FALSE	FALSE
cg14158583	chr1	161059458	161059459	PVRL4	81607	-72	Non-CGI	TRUE	FALSE	FALSE
cg14178748	chr1	153652247	153652248	NPR1	4881	1082	CGI	TRUE	FALSE	FALSE
cg14179389	chr1	92947961	92947962	GFI1	2672	4470	CGI	FALSE	TRUE	FALSE
cg14200569	chr1	3051925	3051926	MIR4251	100422968	7385	CGI	FALSE	TRUE	FALSE
cg14212983	chr1	21985742	21985743	RAP1GAP	5909	10112	CGI-N-Shore	FALSE	TRUE	FALSE
cg14288281	chr1	1093457	1093458	MIR200B	406984	-9025	CGI	FALSE	FALSE	TRUE
cg14415733	chr1	39957204	39957205	BMP8A	353500	-112	CGI	TRUE	FALSE	FALSE
cg14477263	chr1	1168550	1168551	B3GALT6	126792	920	CGI	TRUE	FALSE	FALSE
cg14511923	chr1	7842369	7842370	PER3	8863	-2009	CGI-N-Shore	FALSE	FALSE	TRUE
cg14522793	chr1	38157567	38157568	C1orf109	54955	319	CGI	TRUE	TRUE	FALSE
cg14531564	chr1	1154853	1154854	TNFRSF4	7293	-5304	CGI-S-Shore	TRUE	TRUE	FALSE
cg14615266	chr1	35586649	35586650	ZMYM1	79830	41676	CGI	FALSE	FALSE	TRUE
cg14662119	chr1	153950267	153950268	JTB	10899	182	CGI	TRUE	FALSE	FALSE
cg14663264	chr1	91192798	91192799	BARHL2	343472	-10003	CGI-S-Shore	FALSE	FALSE	TRUE
cg14709479	chr1	1108924	1108925	TTLL10	254173	-360	CGI	TRUE	TRUE	FALSE
cg14790208	chr1	145610755	145610756	POLR3C	10623	127	CGI	TRUE	FALSE	FALSE
cg14795268	chr1	1341852	1341853	MRPL20	55052	839	CGI	FALSE	TRUE	FALSE
cg14838433	chr1	55446303	55446304	TMEM61	199964	-160	CGI	TRUE	FALSE	FALSE
cg14852384	chr1	229569877	229569878	ACTA1	58	-33	CGI	TRUE	FALSE	FALSE
cg15076663	chr1	18023561	18023562	ACTL8	81569	-58245	CGI	FALSE	TRUE	FALSE
cg15154191	chr1	3527782	3527783	MEGF6	1953	275	CGI	TRUE	FALSE	FALSE
cg15202378	chr1	180199443	180199444	LHX4	89884	9	CGI	TRUE	FALSE	FALSE
cg15386773	chr1	75139490	75139491	C1orf173	127254	-67	CGI-S-Shore	TRUE	FALSE	FALSE
cg15481858	chr1	223972634	223972635	TP53BP2	7159	61038	Non-CGI	FALSE	TRUE	FALSE
cg15492552	chr1	1297576	1297577	MXRA8	54587	-418	CGI-S-Shore	TRUE	FALSE	FALSE
cg15555335	chr1	20208763	20208764	OTUD3	23252	-123	CGI	TRUE	FALSE	FALSE
cg15558129	chr1	219347279	219347280	LYPLAL1	127018	86	CGI	TRUE	FALSE	FALSE
cg15561613	chr1	245851610	245851611	KIF26B	55083	533322	CGI	FALSE	TRUE	FALSE
cg15580417	chr1	160053947	160053948	KCNJ9	3765	2586	CGI	FALSE	TRUE	FALSE
cg15628917	chr1	60539559	60539560	C1orf87	127795	-116	CGI	TRUE	FALSE	FALSE
cg15653910	chr1	20799948	20799949	CAMK2N1	55450	12778	CGI-S-Shore	FALSE	FALSE	TRUE
cg15684811	chr1	59250924	59250925	LOC100131060	100131060	100	CGI	TRUE	FALSE	FALSE
cg15694180	chr1	155023435	155023436	ADAM15	8751	12	CGI	TRUE	TRUE	FALSE
cg15705054	chr1	154927709	154927710	PBXIP1	57326	856	Non-CGI	TRUE	TRUE	FALSE
cg15717853	chr1	182573596	182573597	RGS16	6004	-47	CGI	TRUE	FALSE	FALSE
cg15818358	chr1	42501757	42501758	HIVEP3	59269	-160	CGI	TRUE	FALSE	FALSE
cg15824543	chr1	1695391	1695392	NADK	65220	16115	CGI-N-Shore	FALSE	TRUE	FALSE
cg15892864	chr1	161444516	161444517	FCGR2A	2212	-30687	CGI-S-Shore	FALSE	FALSE	TRUE
cg16028201	chr1	62784802	62784803	KANK4	163782	279	CGI	TRUE	FALSE	FALSE
cg16049941	chr1	228466971	228466972	OBSCN	84033	71109	CGI	TRUE	TRUE	FALSE
cg16134717	chr1	11752494	11752495	DRAXIN	374946	712	CGI	TRUE	TRUE	FALSE
cg16145216	chr1	42385662	42385663	HIVEP3	59269	115932	CGI-S-Shore	TRUE	TRUE	FALSE
cg16306900	chr1	182026435	182026436	ZNF648	127665	4410	CGI	TRUE	TRUE	FALSE
cg16314291	chr1	31886585	31886586	SERINC2	347735	4172	CGI	TRUE	TRUE	FALSE
cg16391955	chr1	50881185	50881186	DMRTA2	63950	7932	CGI	FALSE	FALSE	TRUE
cg16430166	chr1	232941468	232941469	MAP10	54627	829	CGI	TRUE	FALSE	FALSE
cg16575694	chr1	1273375	1273376	TAS1R3	83756	6648	CGI-S-Shore	FALSE	TRUE	FALSE
cg16678437	chr1	245133033	245133034	EFCAB2	84288	-136	CGI	TRUE	FALSE	FALSE
cg16691821	chr1	2375627	2375628	PEX10	5192	-31616	CGI	FALSE	FALSE	TRUE
cg16701939	chr1	112533260	112533261	KCND3	3752	-1482	CGI	TRUE	FALSE	FALSE
cg16704678	chr1	32230177	32230178	BAI2	576	-528	CGI	TRUE	FALSE	FALSE
cg16900814	chr1	173990879	173990880	RC3H1	149041	-28668	CGI	FALSE	FALSE	TRUE
cg16909962	chr1	229406711	229406712	RAB4A	5867	-166	CGI	TRUE	FALSE	FALSE
cg17024258	chr1	160370982	160370983	VANGL2	57216	750	CGI	FALSE	TRUE	FALSE
cg17024643	chr1	214725274	214725275	PTPN14	5784	-249	CGI	TRUE	FALSE	FALSE
cg17074213	chr1	92351695	92351696	TGFBR3	7049	19862	CGI	TRUE	TRUE	FALSE
cg17077171	chr1	155658509	155658510	DAP3	7818	-371	CGI	TRUE	TRUE	FALSE
cg17101920	chr1	53192387	53192388	ZYG11B	79699	255	CGI	FALSE	TRUE	FALSE
cg17104258	chr1	167090646	167090647	DUSP27	92235	26574	CGI	FALSE	TRUE	FALSE
cg17122213	chr1	1564920	1564921	MMP23B	8510	-2638	CGI	FALSE	TRUE	FALSE
cg17130982	chr1	1946008	1946009	GABRD	2563	-4758	CGI-N-Shore	FALSE	TRUE	FALSE
cg17131030	chr1	115632576	115632577	TSPAN2	10100	-454	CGI	TRUE	FALSE	FALSE
cg17142722	chr1	1363280	1363281	TMEM88B	643965	1771	CGI	FALSE	FALSE	TRUE
cg17154605	chr1	44821233	44821234	ERI3	79033	-293	CGI-S-Shore	TRUE	FALSE	FALSE
cg17158913	chr1	10764886	10764887	CASZ1	54897	91819	CGI	FALSE	TRUE	FALSE
cg17182302	chr1	116961525	116961526	ATP1A1OS	84852	-280	CGI-S-Shore	TRUE	FALSE	FALSE
cg17239770	chr1	2540942	2540943	FAM213B	127281	23042	CGI	FALSE	TRUE	FALSE
cg17412901	chr1	3332705	3332706	ARHGEF16	27237	-38440	CGI-S-Shore	FALSE	TRUE	FALSE
cg17463745	chr1	16554402	16554403	RSG1	79363	9255	CGI	FALSE	FALSE	TRUE
cg17475085	chr1	112525092	112525093	KCND3	3752	6683	CGI	FALSE	TRUE	FALSE
cg17503596	chr1	203764137	203764138	ZC3H11A	9877	-612	CGI-N-Shore	TRUE	FALSE	FALSE
cg17513182	chr1	153894941	153894942	GATAD2B	57459	508	CGI	FALSE	TRUE	FALSE
cg17592853	chr1	29587255	29587256	PTPRU	10076	24226	CGI	FALSE	TRUE	FALSE
cg17716664	chr1	165204799	165204800	LMX1A	4009	121151	CGI	FALSE	TRUE	FALSE
cg17809276	chr1	172501547	172501548	SUCO	51430	-711	CGI	TRUE	FALSE	FALSE
cg17833169	chr1	67600547	67600548	C1orf141	400757	104	CGI	FALSE	TRUE	FALSE
cg17836940	chr1	26758808	26758809	DHDDS	79947	34	CGI	TRUE	FALSE	FALSE
cg17838705	chr1	112298602	112298603	FAM212B	55924	-182	CGI	TRUE	FALSE	FALSE
cg17848003	chr1	3704513	3704514	LRRC47	57470	8553	CGI	FALSE	TRUE	FALSE
cg17873612	chr1	23279531	23279532	LOC729059	729059	62810	CGI-N-Shore	FALSE	FALSE	TRUE
cg17940849	chr1	3193280	3193281	MIR4251	100422968	148740	CGI	FALSE	TRUE	FALSE
cg17947461	chr1	87797169	87797170	LMO4	8543	3017	CGI	TRUE	TRUE	FALSE
cg17949727	chr1	38412684	38412685	INPP5B	3633	43	Non-CGI	TRUE	FALSE	FALSE
cg17974166	chr1	23280069	23280070	LOC729059	729059	62272	CGI	FALSE	FALSE	TRUE
cg18131141	chr1	36043002	36043003	TFAP2E	339488	4030	CGI	FALSE	TRUE	FALSE
cg18133145	chr1	16060689	16060690	SLC25A34	284723	-2118	CGI	FALSE	TRUE	FALSE
cg18146737	chr1	92946700	92946701	GFI1	2672	5731	CGI	FALSE	TRUE	FALSE
cg18174258	chr1	247275326	247275327	C1orf229	388759	391	CGI	TRUE	FALSE	FALSE
cg18192083	chr1	6086254	6086255	NPHP4	261734	-33720	CGI-N-Shore	TRUE	TRUE	FALSE
cg18279134	chr1	16394568	16394569	FAM131C	348487	5557	Non-CGI	FALSE	TRUE	FALSE
cg18325794	chr1	32083737	32083738	HCRTR1	3061	435	CGI	TRUE	TRUE	FALSE
cg18344652	chr1	95393096	95393097	CNN3	1266	-360	CGI	TRUE	FALSE	FALSE
cg18387017	chr1	1167389	1167390	SDF4	51150	56	CGI	TRUE	FALSE	FALSE
cg18434712	chr1	32817681	32817682	FAM229A	100128071	10161	CGI	FALSE	FALSE	TRUE
cg18788524	chr1	145096602	145096603	SEC22B	9554	194	CGI	TRUE	TRUE	FALSE
cg18794839	chr1	215256262	215256263	KCNK2	3776	77376	CGI	TRUE	TRUE	FALSE
cg18862597	chr1	17265457	17265458	MFAP2	4237	42622	CGI-N-Shore	TRUE	TRUE	FALSE
cg18878886	chr1	21031238	21031239	KIF17	57576	13077	CGI	FALSE	TRUE	FALSE
cg18935813	chr1	111149153	111149154	KCNA2	3737	24941	CGI	TRUE	TRUE	FALSE
cg19084726	chr1	145075538	145075539	PDE4DIP	9659	646	CGI	FALSE	TRUE	FALSE
cg19236794	chr1	1181769	1181770	FAM132A	388581	331	CGI	FALSE	TRUE	FALSE
cg19241954	chr1	208421318	208421319	PLXNA2	5362	-3652	CGI-S-Shelf	FALSE	FALSE	TRUE
cg19304150	chr1	114696350	114696351	SYT6	148281	120	CGI	TRUE	FALSE	FALSE
cg19317333	chr1	3319433	3319434	ARHGEF16	27237	-51712	CGI-N-Shore	TRUE	TRUE	FALSE
cg19356191	chr1	116371337	116371338	NHLH2	4808	12408	CGI	FALSE	FALSE	TRUE
cg19361865	chr1	220922163	220922164	MARC2	54996	486	CGI	FALSE	TRUE	FALSE
cg19367540	chr1	112531802	112531803	KCND3	3752	-24	CGI	TRUE	FALSE	FALSE
cg19414591	chr1	91190582	91190583	BARHL2	343472	-7787	CGI	FALSE	FALSE	TRUE
cg19590227	chr1	10755322	10755323	CASZ1	54897	101383	CGI	TRUE	TRUE	FALSE
cg19645639	chr1	113500384	113500385	SLC16A1	6566	-1408	CGI-S-Shore	TRUE	TRUE	FALSE
cg19694978	chr1	40420603	40420604	MFSD2A	84879	-179	CGI	TRUE	FALSE	FALSE
cg19726343	chr1	7515595	7515596	VAMP3	9341	-315732	CGI-N-Shore	FALSE	TRUE	FALSE
cg19756726	chr1	11596578	11596579	PTCHD2	57540	57282	CGI	FALSE	TRUE	FALSE
cg19811864	chr1	155036142	155036143	EFNA3	1944	-69	CGI	TRUE	TRUE	FALSE
cg19820919	chr1	9380800	9380801	SPSB1	80176	27858	CGI	FALSE	TRUE	FALSE
cg19827787	chr1	23763612	23763613	TCEA3	6920	-12350	CGI	TRUE	TRUE	FALSE
cg20168230	chr1	37499649	37499650	GRIK3	2899	193	CGI	TRUE	FALSE	FALSE
cg20242752	chr1	179713091	179713092	FAM163A	148753	16175	CGI	FALSE	TRUE	FALSE
cg20255817	chr1	1597454	1597455	MMP23B	8510	29893	CGI	FALSE	TRUE	FALSE
cg20271029	chr1	46859845	46859846	FAAH	2166	-92	CGI	TRUE	FALSE	FALSE
cg20282741	chr1	53704012	53704013	LOC100507564	100507564	-268	CGI	TRUE	TRUE	FALSE
cg20296524	chr1	234614614	234614615	TARBP1	6894	233	CGI	TRUE	FALSE	FALSE
cg20298273	chr1	156897330	156897331	LRRC71	149499	6905	CGI	FALSE	TRUE	FALSE
cg20303021	chr1	223316476	223316477	TLR5	7100	146	CGI	FALSE	TRUE	FALSE
cg20311863	chr1	91184126	91184127	BARHL2	343472	-1331	CGI	TRUE	FALSE	FALSE
cg20313496	chr1	155579807	155579808	MSTO1	55154	-198	CGI	TRUE	FALSE	FALSE
cg20314620	chr1	3816831	3816832	C1orf174	339448	24	CGI	TRUE	FALSE	FALSE
cg20611911	chr1	3567930	3567931	TP73	7161	-1197	CGI	TRUE	FALSE	FALSE
cg20613432	chr1	2799579	2799580	TTC34	100287898	-93348	CGI	FALSE	FALSE	TRUE
cg20630560	chr1	228395858	228395859	OBSCN	84033	-1	CGI-N-Shelf	TRUE	TRUE	FALSE
cg20707222	chr1	76540222	76540223	ST6GALNAC3	256435	-165	CGI	TRUE	FALSE	FALSE
cg20773915	chr1	6171788	6171789	CHD5	26038	68404	CGI	FALSE	TRUE	FALSE
cg20792512	chr1	22469190	22469191	WNT4	54361	1193	CGI	FALSE	TRUE	FALSE
cg20801456	chr1	226099031	226099032	LEFTY1	10637	12932	CGI	FALSE	TRUE	FALSE
cg20810398	chr1	11159847	11159848	EXOSC10	5394	89	CGI	TRUE	FALSE	FALSE
cg20815701	chr1	110454063	110454064	CSF1	1435	829	CGI-S-Shore	FALSE	TRUE	FALSE
cg20826345	chr1	2350197	2350198	PEX10	5192	-6186	CGI-S-Shore	FALSE	FALSE	TRUE
cg20846236	chr1	32645337	32645338	TXLNA	200081	-6	CGI	TRUE	FALSE	FALSE
cg21010995	chr1	5927942	5927943	MIR4689	100616421	-5140	CGI-S-Shore	TRUE	TRUE	FALSE
cg21113740	chr1	79472343	79472344	ELTD1	64123	150	CGI	TRUE	FALSE	FALSE
cg21302420	chr1	112162376	112162377	LOC100129269	100129269	-11435	CGI	TRUE	TRUE	FALSE
cg21409895	chr1	59012418	59012419	OMA1	115209	26	CGI	TRUE	FALSE	FALSE
cg21440584	chr1	231155682	231155683	MIR1182	100302132	-11	CGI-N-Shore	TRUE	TRUE	FALSE
cg21455438	chr1	208084436	208084437	CD34	947	245	CGI	TRUE	FALSE	FALSE
cg21609640	chr1	166890380	166890381	TADA1	117143	-44725	CGI	FALSE	TRUE	FALSE
cg21646186	chr1	110052458	110052459	AMIGO1	57463	-121	CGI	TRUE	FALSE	FALSE
cg21679391	chr1	1286917	1286918	DVL1	1855	-2424	CGI	FALSE	FALSE	TRUE
cg21693788	chr1	244998183	244998184	COX20	116228	-454	CGI	TRUE	FALSE	FALSE
cg21774754	chr1	212873477	212873478	BATF3	55509	-149	CGI	TRUE	FALSE	FALSE
cg21778193	chr1	1098070	1098071	MIR200B	406984	-4412	CGI	FALSE	FALSE	TRUE
cg21830313	chr1	3528077	3528078	MEGF6	1953	-17	CGI	TRUE	FALSE	FALSE
cg21863110	chr1	116380417	116380418	NHLH2	4808	3328	CGI	FALSE	TRUE	FALSE
cg21868050	chr1	155231980	155231981	SCAMP3	10067	194	CGI	TRUE	FALSE	FALSE
cg21908235	chr1	146551744	146551745	LOC728989	728989	-37144	CGI	FALSE	FALSE	TRUE
cg21915639	chr1	46769308	46769309	UQCRH	7388	-70	CGI	TRUE	FALSE	FALSE
cg22042144	chr1	211432745	211432746	RCOR3	55758	36	CGI	TRUE	FALSE	FALSE
cg22109530	chr1	178310534	178310535	TEX35	84066	-171676	Non-CGI	TRUE	TRUE	FALSE
cg22123915	chr1	86047807	86047808	CYR61	3491	1362	CGI	TRUE	TRUE	FALSE
cg22167515	chr1	91192466	91192467	BARHL2	343472	-9671	CGI	FALSE	FALSE	TRUE
cg22333259	chr1	19394757	19394758	IFFO2	126917	-111930	Non-CGI	FALSE	FALSE	TRUE
cg22337407	chr1	11046185	11046186	C1orf127	148345	-4090	Non-CGI	FALSE	FALSE	TRUE
cg22343327	chr1	84819379	84819380	UOX	391051	44195	Non-CGI	FALSE	FALSE	TRUE
cg22371492	chr1	170637796	170637797	PRRX1	5396	4482	CGI	FALSE	TRUE	FALSE
cg22376366	chr1	1275137	1275138	TAS1R3	83756	8410	CGI	TRUE	TRUE	FALSE
cg22389730	chr1	161697241	161697242	FCRLB	127943	5906	CGI	FALSE	TRUE	FALSE
cg22399423	chr1	169075400	169075401	ATP1B1	481	-545	CGI	TRUE	FALSE	FALSE
cg22451657	chr1	6558088	6558089	PLEKHG5	57449	21979	CGI	TRUE	TRUE	FALSE
cg22488975	chr1	184724009	184724010	EDEM3	80267	30	CGI	TRUE	FALSE	FALSE
cg22492252	chr1	16302707	16302708	ZBTB17	7709	-79	CGI-S-Shore	TRUE	FALSE	FALSE
cg22495848	chr1	2425173	2425174	PLCH2	9651	17418	CGI	FALSE	TRUE	FALSE
cg22536808	chr1	45965870	45965871	MMACHC	25974	13	CGI	TRUE	FALSE	FALSE
cg22609277	chr1	111746873	111746874	DENND2D	79961	156	CGI	FALSE	TRUE	FALSE
cg22619719	chr1	1891578	1891579	TMEM52	339456	-40837	CGI-S-Shore	FALSE	TRUE	FALSE
cg22682031	chr1	151585010	151585011	SNX27	81609	347	CGI	FALSE	TRUE	FALSE
cg22690212	chr1	145438435	145438436	TXNIP	10628	-25	CGI	TRUE	FALSE	FALSE
cg22712840	chr1	2026193	2026194	PRKCZ	5590	44283	CGI	FALSE	TRUE	FALSE
cg22728128	chr1	112299491	112299492	FAM212B	55924	-1071	CGI-S-Shore	TRUE	TRUE	FALSE
cg22789900	chr1	226411715	226411716	MIXL1	83881	331	CGI	TRUE	FALSE	FALSE
cg22790758	chr1	15013167	15013168	KAZN	23254	87953	Non-CGI	FALSE	TRUE	FALSE
cg22795216	chr1	47078649	47078650	MOB3C	148932	3912	CGI	FALSE	TRUE	FALSE
cg22871801	chr1	19245969	19245970	ALDH4A1	8659	-16675	CGI	FALSE	TRUE	FALSE
cg23002761	chr1	16085642	16085643	FBLIM1	54751	2487	CGI	FALSE	TRUE	FALSE
cg23015118	chr1	2232527	2232528	LOC100129534	100129534	51571	CGI	FALSE	TRUE	FALSE
cg23029526	chr1	21616984	21616985	LOC100506801	100506801	-2797	CGI	TRUE	TRUE	FALSE
cg23087108	chr1	1120617	1120618	TTLL10	254173	11330	CGI	FALSE	TRUE	FALSE
cg23093692	chr1	234367145	234367146	MIR4671	100616380	-75066	CGI	FALSE	TRUE	FALSE
cg23098018	chr1	9775755	9775756	C1orf200	644997	-61110	CGI	TRUE	TRUE	FALSE
cg23166857	chr1	1149501	1149502	TNFRSF4	7293	45	CGI	TRUE	FALSE	FALSE
cg23166865	chr1	63539729	63539730	LINC00466	199899	243170	CGI	FALSE	FALSE	TRUE
cg23231974	chr1	11994899	11994900	PLOD1	5351	174	CGI	TRUE	FALSE	FALSE
cg23236404	chr1	26232706	26232707	MIR3917	100500808	237	CGI	TRUE	TRUE	FALSE
cg23281527	chr1	18809531	18809532	KLHDC7A	127707	2106	CGI	TRUE	FALSE	FALSE
cg23291161	chr1	201368914	201368915	LAD1	3898	-244	CGI	TRUE	FALSE	FALSE
cg23394673	chr1	1149211	1149212	TNFRSF4	7293	335	CGI	FALSE	TRUE	FALSE
cg23599716	chr1	44686794	44686795	DMAP1	55929	7668	Non-CGI	FALSE	TRUE	FALSE
cg23606286	chr1	145470592	145470593	ANKRD34A	284615	83	CGI	TRUE	FALSE	FALSE
cg23613205	chr1	246887766	246887767	SCCPDH	51097	387	CGI	TRUE	FALSE	FALSE
cg23618323	chr1	184723951	184723952	EDEM3	80267	88	CGI	TRUE	FALSE	FALSE
cg23665250	chr1	2450022	2450023	PANK4	55229	8011	CGI	FALSE	TRUE	FALSE
cg23670372	chr1	10732290	10732291	CASZ1	54897	124415	CGI-N-Shore	FALSE	TRUE	FALSE
cg23695504	chr1	247275344	247275345	C1orf229	388759	373	CGI	TRUE	FALSE	FALSE
cg23730181	chr1	70033739	70033740	LRRC7	57554	870	CGI	TRUE	FALSE	FALSE
cg23807924	chr1	246860361	246860362	SCCPDH	51097	-27015	CGI-S-Shore	FALSE	FALSE	TRUE
cg23847109	chr1	40783060	40783061	COL9A2	1298	0	CGI	TRUE	FALSE	FALSE
cg23890506	chr1	155023350	155023351	ADAM15	8751	-70	CGI	TRUE	TRUE	FALSE
cg23931819	chr1	1245076	1245077	ACAP3	116983	-86	CGI	TRUE	TRUE	FALSE
cg23984035	chr1	2719864	2719865	TTC34	100287898	-13633	CGI-N-Shore	FALSE	FALSE	TRUE
cg23987789	chr1	7842406	7842407	PER3	8863	-1972	CGI-N-Shore	TRUE	FALSE	FALSE
cg23992410	chr1	214160848	214160849	PROX1	5629	-436	CGI	TRUE	FALSE	FALSE
cg24040576	chr1	246670459	246670460	SMYD3	64754	183	CGI	TRUE	FALSE	FALSE
cg24043628	chr1	225960108	225960109	SRP9	6726	-5405	Non-CGI	FALSE	FALSE	TRUE
cg24143129	chr1	22921120	22921121	EPHA8	2046	31115	CGI-S-Shore	FALSE	TRUE	FALSE
cg24154024	chr1	228550401	228550402	TRIM11	81559	44114	CGI-S-Shelf	FALSE	TRUE	FALSE
cg24296484	chr1	154298543	154298544	ATP8B2	57198	506	CGI-S-Shore	TRUE	TRUE	FALSE
cg24306982	chr1	119549312	119549313	TBX15	6913	-17132	CGI	FALSE	FALSE	TRUE
cg24314057	chr1	192778043	192778044	RGS2	5997	-124	CGI	TRUE	FALSE	FALSE
cg24343413	chr1	151735844	151735845	MRPL9	65005	194	CGI	TRUE	TRUE	FALSE
cg24364143	chr1	33005702	33005703	ZBTB8A	653121	75043	CGI	FALSE	TRUE	FALSE
cg24375409	chr1	38200920	38200921	EPHA10	284656	29902	CGI-N-Shore	FALSE	TRUE	FALSE
cg24393673	chr1	102312610	102312611	DNAJA1P5	94236	-24955	Non-CGI	TRUE	TRUE	FALSE
cg24397815	chr1	50798944	50798945	DMRTA2	63950	90173	CGI	FALSE	FALSE	TRUE
cg24400630	chr1	89728035	89728036	GBP5	115362	10507	Non-CGI	FALSE	TRUE	FALSE
cg24444923	chr1	23280477	23280478	LOC729059	729059	61864	CGI	FALSE	FALSE	TRUE
cg24452347	chr1	24229300	24229301	CNR2	1269	10515	CGI	FALSE	TRUE	FALSE
cg24484895	chr1	2771846	2771847	TTC34	100287898	-65615	CGI	FALSE	FALSE	TRUE
cg24486037	chr1	151345181	151345182	SELENBP1	8991	-16	Non-CGI	TRUE	FALSE	FALSE
cg24499975	chr1	236958184	236958185	MTR	4548	-395	CGI-N-Shore	TRUE	FALSE	FALSE
cg24508409	chr1	112298175	112298176	DDX20	11218	-13	CGI	TRUE	TRUE	FALSE
cg24592462	chr1	42801081	42801082	FOXJ3	22887	465	CGI	TRUE	TRUE	FALSE
cg24593630	chr1	26496180	26496181	ZNF593	51042	-206	CGI-N-Shore	TRUE	FALSE	FALSE
cg24597774	chr1	9400775	9400776	SPSB1	80176	47833	Non-CGI	FALSE	TRUE	FALSE
cg24634568	chr1	43250769	43250770	LOC100129924	100129924	-2890	CGI	FALSE	FALSE	TRUE
cg24641302	chr1	165087025	165087026	LMX1A	4009	238925	CGI-S-Shore	FALSE	FALSE	TRUE
cg24645681	chr1	160952703	160952704	ITLN2	142683	-28113	CGI	FALSE	FALSE	TRUE
cg24674680	chr1	227174512	227174513	ADCK3	56997	89922	CGI-S-Shore	FALSE	TRUE	FALSE
cg24709511	chr1	2251570	2251571	LOC100129534	100129534	32528	CGI-S-Shore	FALSE	FALSE	TRUE
cg24713770	chr1	20649959	20649960	VWA5B1	127731	32546	Non-CGI	FALSE	TRUE	FALSE
cg24718367	chr1	11740508	11740509	MAD2L2	10459	11168	CGI	FALSE	TRUE	FALSE
cg24720336	chr1	151170427	151170428	PIP5K1A	8394	-592	CGI-N-Shore	TRUE	FALSE	FALSE
cg24924936	chr1	78957203	78957204	PTGFR	5737	474	CGI	FALSE	TRUE	FALSE
cg24934561	chr1	3663902	3663903	TP73-AS1	57212	33	CGI	TRUE	FALSE	FALSE
cg24940499	chr1	29508807	29508808	SRSF4	6429	-169	CGI	TRUE	FALSE	FALSE
cg25007722	chr1	247803033	247803034	OR13G1	441933	33308	CGI	FALSE	FALSE	TRUE
cg25031777	chr1	164528501	164528502	PBX1	5087	-94	CGI-S-Shore	TRUE	FALSE	FALSE
cg25104186	chr1	34098967	34098968	ZSCAN20	7579	160734	CGI	FALSE	TRUE	FALSE
cg25147376	chr1	166890293	166890294	TADA1	117143	-44638	CGI	FALSE	TRUE	FALSE
cg25149069	chr1	233464229	233464230	KIAA1804	84451	714	CGI	TRUE	FALSE	FALSE
cg25191850	chr1	233749633	233749634	KCNK1	3775	-115	CGI	TRUE	FALSE	FALSE
cg25198049	chr1	151509723	151509724	TUFT1	7286	-3056	CGI-N-Shelf	FALSE	TRUE	FALSE
cg25201881	chr1	114695527	114695528	SYT6	148281	943	CGI	TRUE	TRUE	FALSE
cg25204440	chr1	209979598	209979599	IRF6	3664	-77	CGI	TRUE	FALSE	FALSE
cg25221196	chr1	2387967	2387968	PLCH2	9651	-19785	CGI	FALSE	FALSE	TRUE
cg25286333	chr1	6269448	6269449	RNF207	388591	3258	CGI	FALSE	TRUE	FALSE
cg25288420	chr1	78511713	78511714	GIPC2	54810	123	CGI	TRUE	FALSE	FALSE
cg25346059	chr1	154599894	154599895	ADAR	103	560	CGI	FALSE	TRUE	FALSE
cg25408237	chr1	9656984	9656985	TMEM201	199953	8051	Non-CGI	TRUE	TRUE	FALSE
cg25622154	chr1	228657536	228657537	MIR4666A	100616308	7760	CGI	FALSE	FALSE	TRUE
cg25755804	chr1	111813307	111813308	CHIAP2	149620	-9837	CGI-N-Shore	FALSE	FALSE	TRUE
cg25756066	chr1	85931083	85931084	DDAH1	23576	112961	CGI	TRUE	TRUE	FALSE
cg25758134	chr1	100503766	100503767	HIAT1	64645	-21	CGI	TRUE	FALSE	FALSE
cg25947945	chr1	201368946	201368947	LAD1	3898	-276	CGI	TRUE	FALSE	FALSE
cg26003818	chr1	231474059	231474060	SPRTN	83932	376	CGI	TRUE	FALSE	FALSE
cg26011771	chr1	32671304	32671305	IQCC	55721	67	CGI	TRUE	FALSE	FALSE
cg26030770	chr1	36912487	36912488	OSCP1	127700	3597	CGI-N-Shelf	FALSE	TRUE	FALSE
cg26034375	chr1	31907354	31907355	SERINC2	347735	24941	Non-CGI	FALSE	TRUE	FALSE
cg26044038	chr1	113261488	113261489	FAM19A3	284467	-1699	CGI-N-Shore	TRUE	FALSE	FALSE
cg26047066	chr1	221069136	221069137	HLX	3142	16392	CGI	FALSE	FALSE	TRUE
cg26052730	chr1	248020331	248020332	TRIM58	25893	-168	CGI-N-Shore	TRUE	FALSE	FALSE
cg26164879	chr1	38599626	38599627	MIR3659	100500801	44722	CGI-N-Shore	FALSE	FALSE	TRUE
cg26303165	chr1	228401758	228401759	OBSCN	84033	5896	CGI	TRUE	TRUE	FALSE
cg26418147	chr1	205743515	205743516	RAB7L1	8934	1093	CGI-N-Shore	FALSE	TRUE	FALSE
cg26422458	chr1	79472452	79472453	ELTD1	64123	41	CGI	TRUE	FALSE	FALSE
cg26549034	chr1	150337202	150337203	RPRD2	23248	211	CGI	TRUE	FALSE	FALSE
cg26606184	chr1	207495047	207495048	CD55	1604	229	CGI	TRUE	FALSE	FALSE
cg26816907	chr1	197890812	197890813	LHX9	56956	9176	CGI-S-Shore	FALSE	TRUE	FALSE
cg26820223	chr1	150898727	150898728	SETDB1	9869	-86	CGI	TRUE	FALSE	FALSE
cg26862690	chr1	46152339	46152340	GPBP1L1	60313	-36	CGI	TRUE	FALSE	FALSE
cg26864230	chr1	47911508	47911509	FOXD2	2306	9818	CGI	FALSE	FALSE	TRUE
cg26875805	chr1	166890429	166890430	TADA1	117143	-44774	CGI	FALSE	TRUE	FALSE
cg26907082	chr1	18971840	18971841	PAX7	5081	14339	CGI	FALSE	TRUE	FALSE
cg26912890	chr1	214724875	214724876	PTPN14	5784	147	CGI	TRUE	FALSE	FALSE
cg26985289	chr1	9884622	9884623	CLSTN1	22883	-71	CGI	TRUE	FALSE	FALSE
cg27176828	chr1	209848550	209848551	G0S2	50486	-118	CGI	TRUE	FALSE	FALSE
cg27222785	chr1	1008091	1008092	RNF223	401934	1594	CGI-S-Shore	TRUE	TRUE	FALSE
cg27299712	chr1	6550532	6550533	TNFRSF25	8718	-24276	CGI	TRUE	TRUE	FALSE
cg27314669	chr1	156822430	156822431	INSRR	3645	6280	CGI-S-Shelf	FALSE	TRUE	FALSE
cg27393126	chr1	75139364	75139365	C1orf173	127254	56	CGI	TRUE	FALSE	FALSE
cg27447006	chr1	23763279	23763280	TCEA3	6920	-12017	CGI	TRUE	TRUE	FALSE
cg27547283	chr1	156698502	156698503	RRNAD1	51093	238	CGI	TRUE	FALSE	FALSE
cg27549720	chr1	19992167	19992168	HTR6	3362	386	CGI	TRUE	FALSE	FALSE
cg27566521	chr1	9970633	9970634	CTNNBIP1	56998	-316	CGI	TRUE	FALSE	FALSE
cg27578760	chr1	157490623	157490624	FCRL5	83416	31685	CGI	FALSE	TRUE	FALSE
cg00097146	chr2	45171818	45171819	SIX3	6496	2780	CGI	FALSE	TRUE	FALSE
cg00164941	chr2	73523056	73523057	EGR4	1961	-2226	CGI-S-Shelf	FALSE	FALSE	TRUE
cg00209038	chr2	48982683	48982684	LHCGR	3973	195	CGI	TRUE	TRUE	FALSE
cg00261688	chr2	190305566	190305567	WDR75	84128	-591	CGI-N-Shore	TRUE	FALSE	FALSE
cg00366814	chr2	75061219	75061220	HK2	3099	1436	CGI	TRUE	FALSE	FALSE
cg00590251	chr2	119980583	119980584	STEAP3	55240	-799	CGI-N-Shore	TRUE	FALSE	FALSE
cg00593536	chr2	139538222	139538223	NXPH2	11249	-410	CGI	TRUE	FALSE	FALSE
cg00619126	chr2	105459775	105459776	LOC100506421	100506421	8157	CGI	FALSE	TRUE	FALSE
cg00667937	chr2	168572563	168572564	B3GALT1	8708	-102617	CGI	FALSE	FALSE	TRUE
cg00701946	chr2	54087200	54087201	GPR75	10936	-29	CGI	TRUE	FALSE	FALSE
cg00705280	chr2	219866493	219866494	MIR375	494324	-62	CGI	TRUE	FALSE	FALSE
cg00782200	chr2	145280523	145280524	ZEB2-AS1	100303491	-2056	CGI	FALSE	FALSE	TRUE
cg00885843	chr2	131058072	131058073	CCDC115	84317	41848	CGI	FALSE	FALSE	TRUE
cg00900124	chr2	69969033	69969034	ANXA4	307	-92	CGI	TRUE	FALSE	FALSE
cg01100175	chr2	149645880	149645881	KIF5C	3800	13087	CGI	FALSE	TRUE	FALSE
cg01102158	chr2	3381484	3381485	TSSC1	7260	167	CGI	TRUE	FALSE	FALSE
cg01114124	chr2	240171748	240171749	MGC16025	85009	-54594	CGI	FALSE	TRUE	FALSE
cg01128642	chr2	19558808	19558809	OSR1	130497	-435	CGI	TRUE	FALSE	FALSE
cg01144148	chr2	24163529	24163530	UBXN2A	165324	13373	CGI	FALSE	TRUE	FALSE
cg01299579	chr2	10830716	10830717	NOL10	79954	-603	CGI-S-Shore	TRUE	FALSE	FALSE
cg01308931	chr2	120517826	120517827	PTPN4	5775	618	CGI	TRUE	FALSE	FALSE
cg01313518	chr2	25584954	25584955	DNMT3A	1788	-19494	CGI	FALSE	FALSE	TRUE
cg01315092	chr2	120980375	120980376	TMEM185B	79134	607	CGI	TRUE	FALSE	FALSE
cg01405040	chr2	176964137	176964138	HOXD12	3238	-391	CGI	TRUE	FALSE	FALSE
cg01419831	chr2	162283705	162283706	TBR1	10716	11084	CGI	FALSE	FALSE	TRUE
cg01422370	chr2	73384389	73384390	RAB11FIP5	26056	-44242	CGI	FALSE	FALSE	TRUE
cg01598371	chr2	37423428	37423429	LOC100505876	100505876	-205	CGI-N-Shore	TRUE	TRUE	FALSE
cg01708273	chr2	176974060	176974061	HOXD11	3237	4809	CGI	FALSE	TRUE	FALSE
cg01726823	chr2	65454860	65454861	ACTR2	10097	30	CGI	TRUE	FALSE	FALSE
cg01741999	chr2	219137824	219137825	PNKD	25953	2708	CGI-S-Shelf	FALSE	TRUE	FALSE
cg01789478	chr2	182545485	182545486	NEUROD1	4760	-92	CGI	TRUE	FALSE	FALSE
cg01879591	chr2	242954430	242954431	LOC728323	728323	-76412	CGI	FALSE	FALSE	TRUE
cg01971203	chr2	183473411	183473412	PDE1A	5136	-85903	CGI	FALSE	FALSE	TRUE
cg02111748	chr2	43903650	43903651	LOC728819	728819	-188	CGI	TRUE	TRUE	FALSE
cg02149880	chr2	216878419	216878420	MREG	55686	-72	CGI	TRUE	TRUE	FALSE
cg02343254	chr2	3583963	3583964	RNASEH1	246243	21975	Non-CGI	FALSE	FALSE	TRUE
cg02343720	chr2	241516354	241516355	RNPEPL1	57140	8349	CGI-S-Shelf	FALSE	TRUE	FALSE
cg02467646	chr2	27546052	27546053	MPV17	4358	2493	CGI	TRUE	TRUE	FALSE
cg02657760	chr2	219157083	219157084	TMBIM1	64114	195	CGI	FALSE	TRUE	FALSE
cg02694427	chr2	176964512	176964513	HOXD12	3238	-16	CGI	TRUE	FALSE	FALSE
cg02773086	chr2	177027440	177027441	HOXD3	3232	-1363	CGI	TRUE	FALSE	FALSE
cg02828023	chr2	107503834	107503835	ST6GAL2	84620	-270	CGI	TRUE	FALSE	FALSE
cg03035921	chr2	122407209	122407210	LOC254128	254128	-19	CGI	TRUE	FALSE	FALSE
cg03074424	chr2	183989067	183989068	NUP35	129401	4316	CGI	TRUE	TRUE	FALSE
cg03129884	chr2	95692727	95692728	MAL	4118	1247	CGI	FALSE	TRUE	FALSE
cg03181248	chr2	175199670	175199671	SP9	100131390	-149	CGI	TRUE	FALSE	FALSE
cg03203239	chr2	74735315	74735316	PCGF1	84759	-493	CGI	TRUE	FALSE	FALSE
cg03205007	chr2	55845736	55845737	SMEK2	57223	-622	CGI	TRUE	FALSE	FALSE
cg03257743	chr2	11123616	11123617	KCNF1	3754	71552	Non-CGI	FALSE	FALSE	TRUE
cg03307465	chr2	40679519	40679520	SLC8A1	6546	60054	CGI	TRUE	TRUE	FALSE
cg03438674	chr2	241372300	241372301	GPC1	2817	-2813	CGI-N-Shelf	FALSE	FALSE	TRUE
cg03445663	chr2	242170236	242170237	ANO7	50636	42311	CGI-S-Shore	FALSE	TRUE	FALSE
cg03450948	chr2	177053274	177053275	HOXD1	3231	-31	CGI	TRUE	TRUE	FALSE
cg03531247	chr2	50573485	50573486	NRXN1	9378	686187	CGI-N-Shore	FALSE	TRUE	FALSE
cg03538480	chr2	8785262	8785263	ID2	3398	-36849	CGI	FALSE	FALSE	TRUE
cg03645581	chr2	27440176	27440177	CAD	790	-80	CGI	TRUE	FALSE	FALSE
cg03674127	chr2	71693870	71693871	DYSF	8291	13116	CGI	TRUE	TRUE	FALSE
cg03717315	chr2	74881780	74881781	SEMA4F	10505	386	CGI	FALSE	TRUE	FALSE
cg03753681	chr2	20866500	20866501	GDF7	151449	75	CGI	TRUE	FALSE	FALSE
cg03754165	chr2	60780427	60780428	BCL11A	53335	204	CGI-S-Shore	TRUE	FALSE	FALSE
cg03801179	chr2	20212423	20212424	MATN3	4148	30	CGI	TRUE	FALSE	FALSE
cg03964958	chr2	176964720	176964721	HOXD12	3238	189	CGI	TRUE	FALSE	FALSE
cg04011897	chr2	240014762	240014763	MIR4441	100616493	-7139	CGI-N-Shore	FALSE	TRUE	FALSE
cg04076766	chr2	71212157	71212158	ANKRD53	79998	6581	CGI	FALSE	TRUE	FALSE
cg04194947	chr2	177012191	177012192	MIR10B	406903	-2838	CGI	FALSE	FALSE	TRUE
cg04201253	chr2	177022517	177022518	HOXD3	3232	-6286	CGI	FALSE	FALSE	TRUE
cg04202122	chr2	29116540	29116541	WDR43	23160	-991	CGI-N-Shore	TRUE	FALSE	FALSE
cg04220104	chr2	179387853	179387854	TTN-AS1	100506866	298	CGI	TRUE	TRUE	FALSE
cg04415176	chr2	176957842	176957843	HOXD13	3239	309	CGI	TRUE	FALSE	FALSE
cg04458869	chr2	169312687	169312688	CERS6	253782	-146	CGI	TRUE	FALSE	FALSE
cg04532229	chr2	103235411	103235412	SLC9A2	6549	-753	CGI	TRUE	FALSE	FALSE
cg04547220	chr2	84743558	84743559	DNAH6	1768	-19	CGI	TRUE	FALSE	FALSE
cg04864807	chr2	121412139	121412140	GLI2	2736	-81058	CGI	FALSE	FALSE	TRUE
cg04942334	chr2	235405480	235405481	ARL4C	10123	211	CGI	TRUE	FALSE	FALSE
cg05099387	chr2	177053292	177053293	HOXD1	3231	-13	CGI	TRUE	TRUE	FALSE
cg05168033	chr2	56150942	56150943	EFEMP1	2202	354	CGI	TRUE	FALSE	FALSE
cg05350188	chr2	26785353	26785354	C2orf70	339778	-126	CGI	TRUE	FALSE	FALSE
cg05714155	chr2	172974735	172974736	DLX2	1746	-7256	CGI	FALSE	FALSE	TRUE
cg05864326	chr2	177030150	177030151	HOXD3	3232	1344	CGI	FALSE	TRUE	FALSE
cg05885936	chr2	132088912	132088913	WTH3DI	150786	32817	CGI	FALSE	TRUE	FALSE
cg05904194	chr2	85132663	85132664	TMSB10	9168	-98	CGI	TRUE	FALSE	FALSE
cg05995360	chr2	236044874	236044875	SH3BP4	23677	184245	CGI	FALSE	FALSE	TRUE
cg06201514	chr2	1817409	1817410	PXDN	7837	-69117	CGI	FALSE	TRUE	FALSE
cg06216650	chr2	558183	558184	TMEM18	129787	119254	CGI	FALSE	FALSE	TRUE
cg06287431	chr2	26205517	26205518	KIF3C	3797	-73	CGI	TRUE	FALSE	FALSE
cg06360703	chr2	169482790	169482791	MIR4774	100616356	43336	Non-CGI	FALSE	TRUE	FALSE
cg06538660	chr2	202645935	202645936	ALS2	57679	-39	CGI	TRUE	FALSE	FALSE
cg06642617	chr2	73461528	73461529	CCT7	10574	163	CGI	TRUE	TRUE	FALSE
cg06674731	chr2	154335014	154335015	RPRM	56475	306	CGI	TRUE	FALSE	FALSE
cg06704122	chr2	119604702	119604703	EN1	2019	1055	CGI	TRUE	FALSE	FALSE
cg06825448	chr2	240884925	240884926	MIR4786	100616417	-2413	CGI	FALSE	FALSE	TRUE
cg06848802	chr2	75275958	75275959	POLE4	56655	90182	Non-CGI	FALSE	TRUE	FALSE
cg06852824	chr2	231582109	231582110	CAB39	51719	4551	CGI-S-Shelf	FALSE	TRUE	FALSE
cg06900899	chr2	241393833	241393834	MIR149	406941	-1583	CGI	TRUE	TRUE	FALSE
cg06906472	chr2	107502801	107502802	ST6GAL2	84620	760	CGI	TRUE	TRUE	FALSE
cg06913508	chr2	207630136	207630137	FASTKD2	22868	23	CGI	TRUE	FALSE	FALSE
cg07049977	chr2	37458536	37458537	CEBPZ	10153	202	CGI	TRUE	TRUE	FALSE
cg07158434	chr2	232571157	232571158	PTMA	5757	-2076	CGI	TRUE	FALSE	FALSE
cg07161827	chr2	71680559	71680560	DYSF	8291	-192	CGI-N-Shore	TRUE	FALSE	FALSE
cg07177569	chr2	187454747	187454748	ITGAV	3685	-41	CGI	TRUE	FALSE	FALSE
cg07186154	chr2	108603244	108603245	SLC5A7	60482	248	CGI	FALSE	TRUE	FALSE
cg07212778	chr2	119916510	119916511	C1QL2	165257	-38	CGI	TRUE	FALSE	FALSE
cg07258910	chr2	72079276	72079277	CYP26B1	56603	295685	CGI-N-Shore	FALSE	FALSE	TRUE
cg07323141	chr2	239140169	239140170	LOC151174	151174	147	CGI	TRUE	FALSE	FALSE
cg07417218	chr2	242255421	242255422	HDLBP	3069	-305	CGI	TRUE	TRUE	FALSE
cg07532089	chr2	71018354	71018355	FIGLA	344018	-578	CGI-S-Shore	TRUE	FALSE	FALSE
cg07536910	chr2	176948105	176948106	EVX2	344191	583	CGI	TRUE	FALSE	FALSE
cg07537917	chr2	241836409	241836410	C2orf54	79919	-835	CGI-S-Shore	TRUE	FALSE	FALSE
cg07594247	chr2	113993304	113993305	LOC654433	654433	196	CGI	TRUE	TRUE	FALSE
cg07654559	chr2	74710618	74710619	CCDC142	84865	-260	CGI	TRUE	TRUE	FALSE
cg07722359	chr2	239318105	239318106	ASB1	51665	-17519	CGI-N-Shore	FALSE	FALSE	TRUE
cg07772999	chr2	113993052	113993053	LOC654433	654433	-53	CGI	TRUE	TRUE	FALSE
cg07901206	chr2	129250690	129250691	HS6ST1	9394	-174518	CGI	FALSE	FALSE	TRUE
cg07939836	chr2	176949533	176949534	EVX2	344191	-842	CGI	TRUE	FALSE	FALSE
cg08012278	chr2	237068350	237068351	GBX2	2637	8300	CGI	FALSE	FALSE	TRUE
cg08077337	chr2	202900063	202900064	FZD7	8324	752	CGI	TRUE	FALSE	FALSE
cg08085232	chr2	65598271	65598272	SPRED2	200734	61383	Non-CGI	FALSE	TRUE	FALSE
cg08135327	chr2	134877962	134877963	MIR3679	100500878	-6732	CGI	FALSE	FALSE	TRUE
cg08146621	chr2	158453928	158453929	ACVR1C	130399	31469	CGI	TRUE	TRUE	FALSE
cg08213337	chr2	178937673	178937674	PDE11A	50940	35391	CGI	TRUE	TRUE	FALSE
cg08266974	chr2	10567273	10567274	SNORA80B	100302743	19700	CGI	FALSE	TRUE	FALSE
cg08385249	chr2	128433373	128433374	LIMS2	55679	5985	CGI	TRUE	TRUE	FALSE
cg08569786	chr2	23616768	23616769	KLHL29	114818	8469	Non-CGI	FALSE	TRUE	FALSE
cg08625192	chr2	242997938	242997939	LOC728323	728323	-32904	CGI	FALSE	FALSE	TRUE
cg08699640	chr2	240061327	240061328	MIR4441	100616493	-53704	CGI	FALSE	TRUE	FALSE
cg08750504	chr2	172946193	172946194	DLX1	1745	-4013	CGI	FALSE	FALSE	TRUE
cg08786077	chr2	37571732	37571733	QPCT	25797	-19	CGI	TRUE	FALSE	FALSE
cg08862564	chr2	208395069	208395070	CREB1	1385	452	CGI	FALSE	TRUE	FALSE
cg08871052	chr2	42274619	42274620	PKDCC	91461	-540	CGI	TRUE	FALSE	FALSE
cg08940762	chr2	233415810	233415811	EIF4E2	9470	452	CGI	TRUE	TRUE	FALSE
cg08979281	chr2	239999829	239999830	MIR4441	100616493	7791	CGI	FALSE	TRUE	FALSE
cg09119654	chr2	61293073	61293074	KIAA1841	84542	66	CGI	TRUE	FALSE	FALSE
cg09132607	chr2	43903582	43903583	LOC728819	728819	-120	CGI	TRUE	TRUE	FALSE
cg09235217	chr2	232263030	232263031	B3GNT7	93010	2694	CGI	FALSE	TRUE	FALSE
cg09235936	chr2	242170211	242170212	ANO7	50636	42286	CGI-S-Shore	FALSE	TRUE	FALSE
cg09253914	chr2	37311580	37311581	GPATCH11	253635	-12	CGI	TRUE	FALSE	FALSE
cg09279240	chr2	180726252	180726253	ZNF385B	151126	-19	CGI	TRUE	FALSE	FALSE
cg09305577	chr2	96874663	96874664	STARD7	56910	-89	CGI	TRUE	FALSE	FALSE
cg09323727	chr2	176936436	176936437	EVX2	344191	12252	CGI	FALSE	FALSE	TRUE
cg09410607	chr2	217237040	217237041	MARCH4	57574	-289	CGI	TRUE	FALSE	FALSE
cg09438147	chr2	210636533	210636534	UNC80	285175	-182	CGI	TRUE	FALSE	FALSE
cg09456297	chr2	38304066	38304067	CYP1B1	1545	-742	CGI	TRUE	FALSE	FALSE
cg09580478	chr2	16689509	16689510	FAM49A	81553	157623	CGI	FALSE	FALSE	TRUE
cg09590377	chr2	8597389	8597390	LINC00299	339789	-128839	CGI	FALSE	FALSE	TRUE
cg09761959	chr2	2754829	2754830	MYT1L	23040	-419783	CGI	FALSE	FALSE	TRUE
cg09987596	chr2	131513705	131513706	AMER3	205147	627	CGI	TRUE	TRUE	FALSE
cg09997497	chr2	183902928	183902929	NCKAP1	10787	299	CGI	TRUE	FALSE	FALSE
cg10122865	chr2	63284132	63284133	OTX1	5013	6939	CGI	FALSE	TRUE	FALSE
cg10239991	chr2	240046227	240046228	MIR4441	100616493	-38604	CGI	FALSE	TRUE	FALSE
cg10429608	chr2	238864632	238864633	UBE2F-SCLY	100533179	-10953	CGI	FALSE	FALSE	TRUE
cg10534439	chr2	69969029	69969030	ANXA4	307	-96	CGI	TRUE	FALSE	FALSE
cg10557743	chr2	99552633	99552634	KIAA1211L	343990	49	CGI	TRUE	FALSE	FALSE
cg10582499	chr2	232675501	232675502	COPS7B	64708	29055	Non-CGI	FALSE	FALSE	TRUE
cg10803714	chr2	69399575	69399576	MIR3126	100423030	68760	Non-CGI	FALSE	TRUE	FALSE
cg10825617	chr2	236659069	236659070	AGAP1	116987	256335	Non-CGI	FALSE	TRUE	FALSE
cg10846328	chr2	127818131	127818132	BIN1	274	46770	CGI	FALSE	TRUE	FALSE
cg10848792	chr2	62732892	62732893	TMEM17	200728	29886	CGI	FALSE	TRUE	FALSE
cg10900202	chr2	131674361	131674362	ARHGEF4	50649	1574	CGI	TRUE	FALSE	FALSE
cg10981275	chr2	3381760	3381761	TSSC1	7260	-106	CGI	TRUE	FALSE	FALSE
cg11041835	chr2	189156425	189156426	GULP1	51454	28	CGI	TRUE	FALSE	FALSE
cg11274314	chr2	242480504	242480505	BOK	666	-17640	CGI	FALSE	FALSE	TRUE
cg11277143	chr2	10334372	10334373	MIR4261	100422929	-1574	Non-CGI	TRUE	TRUE	FALSE
cg11349715	chr2	54557882	54557883	C2orf73	129852	-187	CGI	TRUE	FALSE	FALSE
cg11350208	chr2	133033202	133033203	ANKRD30BL	554226	-17659	CGI-S-Shelf	FALSE	FALSE	TRUE
cg11380327	chr2	24715213	24715214	NCOA1	8648	-71964	CGI	FALSE	FALSE	TRUE
cg11669516	chr2	217501092	217501093	IGFBP2	3485	2964	CGI-S-Shore	FALSE	TRUE	FALSE
cg11707035	chr2	240253573	240253574	MIR2467	100616360	19924	CGI	FALSE	TRUE	FALSE
cg11763394	chr2	113992921	113992922	LOC654433	654433	-184	CGI-N-Shore	TRUE	TRUE	FALSE
cg11946719	chr2	233216220	233216221	ALPP	250	-27126	CGI	FALSE	FALSE	TRUE
cg11990559	chr2	240727278	240727279	LOC150935	150935	42723	CGI-S-Shore	FALSE	FALSE	TRUE
cg12161959	chr2	240868337	240868338	MIR4786	100616417	14172	CGI	FALSE	FALSE	TRUE
cg12191096	chr2	74692545	74692546	MOGS	7841	-7	CGI	TRUE	FALSE	FALSE
cg12307638	chr2	233323532	233323533	ALPI	248	2698	CGI	FALSE	TRUE	FALSE
cg12345955	chr2	60781546	60781547	BCL11A	53335	-912	CGI	TRUE	FALSE	FALSE
cg12535642	chr2	120020901	120020902	STEAP3	55240	39516	CGI	FALSE	TRUE	FALSE
cg12547218	chr2	240153820	240153821	MGC16025	85009	-36666	CGI-S-Shore	FALSE	TRUE	FALSE
cg12571629	chr2	445430	445431	FAM150B	285016	-157121	CGI	FALSE	FALSE	TRUE
cg12573849	chr2	105470711	105470712	POU3F3	5455	-1256	CGI	TRUE	FALSE	FALSE
cg12637786	chr2	220355222	220355223	GMPPA	29926	-8363	Non-CGI	FALSE	TRUE	FALSE
cg12756150	chr2	241140248	241140249	OTOS	150677	-60174	Non-CGI	FALSE	FALSE	TRUE
cg12847502	chr2	43437911	43437912	ZFP36L2	678	15832	Non-CGI	FALSE	FALSE	TRUE
cg12889195	chr2	113992843	113992844	LOC654433	654433	-262	CGI-N-Shore	TRUE	TRUE	FALSE
cg12908608	chr2	198380725	198380726	MOB4	25843	429	CGI	TRUE	TRUE	FALSE
cg12942414	chr2	47596912	47596913	EPCAM	4072	624	CGI	FALSE	TRUE	FALSE
cg13047596	chr2	233735017	233735018	C2orf82	389084	22	Non-CGI	TRUE	FALSE	FALSE
cg13172254	chr2	46843974	46843975	PIGF	5281	275	CGI	TRUE	TRUE	FALSE
cg13220917	chr2	242480249	242480250	BOK	666	-17895	CGI	FALSE	FALSE	TRUE
cg13231954	chr2	8724414	8724415	ID2	3398	-97697	CGI	FALSE	FALSE	TRUE
cg13257636	chr2	29338109	29338110	CLIP4	79745	17537	CGI	TRUE	TRUE	FALSE
cg13314434	chr2	239136349	239136350	LOC151174	151174	3967	CGI-S-Shore	FALSE	TRUE	FALSE
cg13316854	chr2	177027856	177027857	HOXD3	3232	-947	CGI	TRUE	FALSE	FALSE
cg13492070	chr2	217236785	217236786	MARCH4	57574	-34	CGI	TRUE	FALSE	FALSE
cg13664964	chr2	43454185	43454186	LOC100129726	100129726	-163	CGI	TRUE	FALSE	FALSE
cg13686059	chr2	11101549	11101550	KCNF1	3754	49485	CGI	FALSE	FALSE	TRUE
cg13767070	chr2	194367276	194367277	PCGEM1	64002	752704	CGI	FALSE	FALSE	TRUE
cg13773083	chr2	220197274	220197275	RESP18	389075	623	CGI	TRUE	TRUE	FALSE
cg13831124	chr2	220253143	220253144	DNPEP	23549	11584	CGI	TRUE	TRUE	FALSE
cg13886554	chr2	112895695	112895696	FBLN7	129804	-265	CGI-N-Shore	TRUE	FALSE	FALSE
cg13895867	chr2	237076164	237076165	GBX2	2637	486	CGI	TRUE	FALSE	FALSE
cg13899678	chr2	105478933	105478934	POU3F3	5455	6963	CGI	FALSE	FALSE	TRUE
cg14005211	chr2	171676925	171676926	GAD1	2571	3724	CGI	FALSE	TRUE	FALSE
cg14157435	chr2	206628692	206628693	NRP2	8828	81467	CGI-S-Shore	FALSE	TRUE	FALSE
cg14226755	chr2	236923322	236923323	GBX2	2637	153328	CGI-N-Shore	FALSE	TRUE	FALSE
cg14247008	chr2	242786046	242786047	PDCD1	5133	15010	CGI	FALSE	FALSE	TRUE
cg14273450	chr2	26624934	26624935	CCDC164	92749	149	CGI	TRUE	FALSE	FALSE
cg14323539	chr2	928750	928751	SNTG2	54221	-17802	CGI	FALSE	FALSE	TRUE
cg14348756	chr2	79739934	79739935	MIR4264	100422888	136549	CGI	TRUE	TRUE	FALSE
cg14411266	chr2	40679582	40679583	SLC8A1	6546	59991	CGI	TRUE	TRUE	FALSE
cg14453187	chr2	129492760	129492761	HS6ST1	9394	-416588	CGI	FALSE	FALSE	TRUE
cg14507868	chr2	107503819	107503820	ST6GAL2	84620	-255	CGI	TRUE	FALSE	FALSE
cg14526718	chr2	176932840	176932841	EVX2	344191	15848	CGI	FALSE	FALSE	TRUE
cg14530444	chr2	239432329	239432330	LOC151171	151171	31809	CGI	FALSE	TRUE	FALSE
cg14552895	chr2	64068982	64068983	UGP2	7360	883	CGI	TRUE	TRUE	FALSE
cg14595315	chr2	101609869	101609870	RPL31	6160	-8820	CGI	FALSE	TRUE	FALSE
cg14608581	chr2	70122240	70122241	SNRNP27	11017	1164	CGI-S-Shore	FALSE	TRUE	FALSE
cg14636113	chr2	240742128	240742129	LOC150935	150935	57573	CGI-S-Shelf	FALSE	FALSE	TRUE
cg14649507	chr2	231735037	231735038	ITM2C	81618	5415	Non-CGI	FALSE	TRUE	FALSE
cg14659346	chr2	233246431	233246432	ALPP	250	3082	CGI	FALSE	TRUE	FALSE
cg14715696	chr2	176945122	176945123	EVX2	344191	3566	CGI	FALSE	TRUE	FALSE
cg14731653	chr2	219858154	219858155	CRYBA2	1412	-26	CGI	TRUE	FALSE	FALSE
cg14733936	chr2	70476139	70476140	TIA1	7072	-359	CGI	TRUE	FALSE	FALSE
cg14882311	chr2	42328410	42328411	PKDCC	91461	53248	CGI	FALSE	FALSE	TRUE
cg14917329	chr2	106468318	106468319	NCK2	8440	106797	Non-CGI	TRUE	TRUE	FALSE
cg14917572	chr2	3580506	3580507	RNASEH1	246243	25432	Non-CGI	FALSE	FALSE	TRUE
cg14927745	chr2	241562485	241562486	GPR35	2859	17659	CGI	FALSE	TRUE	FALSE
cg14935163	chr2	1488638	1488639	TPO	7173	110642	CGI	FALSE	TRUE	FALSE
cg15133748	chr2	3714379	3714380	ALLC	55821	8592	CGI	FALSE	TRUE	FALSE
cg15311822	chr2	9144618	9144619	MBOAT2	129642	-741	CGI	TRUE	FALSE	FALSE
cg15319457	chr2	239148132	239148133	HES6	55502	547	CGI	FALSE	TRUE	FALSE
cg15400238	chr2	154335640	154335641	RPRM	56475	-317	CGI	TRUE	FALSE	FALSE
cg15423357	chr2	25149977	25149978	ADCY3	109	-7921	CGI	FALSE	FALSE	TRUE
cg15579587	chr2	238600061	238600062	LRRFIP1	9208	63836	CGI	TRUE	TRUE	FALSE
cg15605030	chr2	95992762	95992763	KCNIP3	30818	29689	CGI-S-Shore	FALSE	TRUE	FALSE
cg15769486	chr2	85132558	85132559	TMSB10	9168	-203	CGI	TRUE	FALSE	FALSE
cg15770238	chr2	11822287	11822288	LPIN1	23175	4565	CGI-N-Shore	FALSE	TRUE	FALSE
cg15893070	chr2	190445551	190445552	SLC40A1	30061	2931	CGI	TRUE	TRUE	FALSE
cg15929228	chr2	240323491	240323492	HDAC4	9759	-144	CGI	TRUE	FALSE	FALSE
cg15981851	chr2	236773924	236773925	GBX2	2637	302726	CGI	FALSE	TRUE	FALSE
cg16023545	chr2	237076726	237076727	GBX2	2637	-73	CGI	TRUE	FALSE	FALSE
cg16203330	chr2	65658524	65658525	SPRED2	200734	1130	CGI	FALSE	TRUE	FALSE
cg16327883	chr2	112812775	112812776	TMEM87B	84910	-23	CGI	TRUE	FALSE	FALSE
cg16440561	chr2	220312854	220312855	SPEG	10290	13153	CGI	TRUE	TRUE	FALSE
cg16585651	chr2	119532230	119532231	EN1	2019	73527	CGI	FALSE	FALSE	TRUE
cg16723488	chr2	21266947	21266948	APOB	338	-1	CGI	TRUE	FALSE	FALSE
cg16838838	chr2	85641023	85641024	CAPG	822	145	CGI	FALSE	TRUE	FALSE
cg17032565	chr2	110260096	110260097	2010-09-01	151011	111685	CGI-S-Shore	FALSE	TRUE	FALSE
cg17156255	chr2	27632527	27632528	PPM1G	5496	-30	CGI	TRUE	FALSE	FALSE
cg17156491	chr2	43259508	43259509	ZFP36L2	678	194235	Non-CGI	FALSE	FALSE	TRUE
cg17168093	chr2	85531486	85531487	TGOLN2	10618	23931	Non-CGI	FALSE	TRUE	FALSE
cg17178336	chr2	219925246	219925247	IHH	3549	-7	CGI	TRUE	FALSE	FALSE
cg17186168	chr2	11810403	11810404	NTSR2	23620	-73	CGI	TRUE	FALSE	FALSE
cg17246140	chr2	43020264	43020265	HAAO	23498	-512	CGI	TRUE	FALSE	FALSE
cg17332338	chr2	38763354	38763355	HNRPLL	92906	66822	CGI	FALSE	FALSE	TRUE
cg17360854	chr2	161224771	161224772	MIR4785	100616364	39620	Non-CGI	FALSE	TRUE	FALSE
cg17673769	chr2	46707773	46707774	TMEM247	388946	1068	CGI	FALSE	TRUE	FALSE
cg17745211	chr2	74725369	74725370	LBX2-AS1	151534	-4373	CGI	FALSE	TRUE	FALSE
cg17850055	chr2	239403239	239403240	LOC151171	151171	60899	CGI	FALSE	FALSE	TRUE
cg17851725	chr2	121269372	121269373	LOC84931	84931	-45446	Non-CGI	FALSE	FALSE	TRUE
cg17945962	chr2	67939740	67939741	ETAA1	54465	315297	Non-CGI	FALSE	FALSE	TRUE
cg17962090	chr2	127728910	127728911	BIN1	274	135991	CGI	FALSE	FALSE	TRUE
cg17974674	chr2	241451567	241451568	DUSP28	285193	-47902	Non-CGI	FALSE	TRUE	FALSE
cg18077971	chr2	223164867	223164868	PAX3	5077	-1151	CGI	TRUE	TRUE	FALSE
cg18098774	chr2	107084802	107084803	RGPD3	653489	0	CGI	TRUE	FALSE	FALSE
cg18126883	chr2	112641630	112641631	ANAPC1	64682	109	CGI	TRUE	FALSE	FALSE
cg18182399	chr2	220283175	220283176	DES	1674	75	CGI	TRUE	FALSE	FALSE
cg18192325	chr2	105854051	105854052	GPR45	11250	-4147	CGI-S-Shore	FALSE	FALSE	TRUE
cg18303215	chr2	44059003	44059004	ABCG5	64240	6999	CGI	TRUE	TRUE	FALSE
cg18386867	chr2	39347986	39347987	SOS1	6654	3498	CGI	TRUE	TRUE	FALSE
cg18406033	chr2	223159869	223159870	CCDC140	151278	-2995	CGI	FALSE	TRUE	FALSE
cg18406852	chr2	101010769	101010770	CHST10	9486	23359	CGI-S-Shore	FALSE	TRUE	FALSE
cg18543164	chr2	22409266	22409267	LOC645949	645949	-475741	CGI	FALSE	FALSE	TRUE
cg18549688	chr2	236299625	236299626	AGAP1	116987	-103106	CGI-N-Shore	FALSE	FALSE	TRUE
cg18669186	chr2	119614594	119614595	EN1	2019	-8834	CGI	FALSE	FALSE	TRUE
cg18686665	chr2	629121	629122	TMEM18	129787	48316	CGI	FALSE	FALSE	TRUE
cg18731976	chr2	11485413	11485414	ROCK2	9475	-701	CGI	TRUE	FALSE	FALSE
cg18734842	chr2	75787193	75787194	EVA1A	84141	9653	CGI-N-Shore	FALSE	TRUE	FALSE
cg18867200	chr2	71116698	71116699	VAX2	25806	-11020	CGI	FALSE	FALSE	TRUE
cg18941818	chr2	157184553	157184554	NR4A2	4929	4732	CGI	TRUE	TRUE	FALSE
cg18969008	chr2	10445016	10445017	HPCAL1	3241	1975	CGI	FALSE	TRUE	FALSE
cg18985828	chr2	467799	467800	FAM150B	285016	-179490	CGI	FALSE	FALSE	TRUE
cg19025700	chr2	106016179	106016180	FHL2	2274	39049	CGI	TRUE	TRUE	FALSE
cg19053239	chr2	149645394	149645395	KIF5C	3800	12601	CGI-N-Shore	FALSE	TRUE	FALSE
cg19205847	chr2	239800268	239800269	TWIST2	117581	43594	CGI-S-Shore	FALSE	FALSE	TRUE
cg19303849	chr2	145090156	145090157	GTDC1	79712	-72	CGI	TRUE	FALSE	FALSE
cg19399165	chr2	27301252	27301253	EMILIN1	11117	-181	CGI-N-Shore	TRUE	FALSE	FALSE
cg19486585	chr2	109151054	109151055	LIMS1	3987	242	CGI	TRUE	TRUE	FALSE
cg19504661	chr2	239542427	239542428	LOC151171	151171	-78286	CGI	FALSE	FALSE	TRUE
cg19538089	chr2	171673547	171673548	GAD1	2571	346	CGI	TRUE	FALSE	FALSE
cg19560692	chr2	20646664	20646665	RHOB	388	-169	CGI	TRUE	FALSE	FALSE
cg19576736	chr2	120240175	120240176	SCTR	6344	41851	Non-CGI	FALSE	TRUE	FALSE
cg19719653	chr2	120124522	120124523	DBI	1622	17	CGI	TRUE	FALSE	FALSE
cg19752861	chr2	74153213	74153214	DGUOK	1716	-738	CGI-N-Shore	TRUE	FALSE	FALSE
cg19757382	chr2	241076313	241076314	MYEOV2	150678	-548	CGI	TRUE	FALSE	FALSE
cg19863227	chr2	98280523	98280524	ACTR1B	10120	36	CGI	TRUE	FALSE	FALSE
cg19863760	chr2	74667680	74667681	RTKN	6242	1378	CGI	TRUE	TRUE	FALSE
cg19878627	chr2	54087184	54087185	GPR75	10936	-13	CGI	TRUE	FALSE	FALSE
cg19893929	chr2	16105823	16105824	MYCNOS	10408	-23977	Non-CGI	FALSE	FALSE	TRUE
cg19936585	chr2	139259770	139259771	SPOPL	339745	419	CGI	FALSE	TRUE	FALSE
cg19961545	chr2	54087066	54087067	GPR75	10936	102	CGI	TRUE	FALSE	FALSE
cg20042692	chr2	55450874	55450875	RPS27A	6233	-8163	CGI-S-Shore	FALSE	TRUE	FALSE
cg20057198	chr2	731561	731562	TMEM18	129787	-54121	CGI	FALSE	FALSE	TRUE
cg20093808	chr2	9563643	9563644	ITGB1BP1	9270	0	CGI	TRUE	FALSE	FALSE
cg20095674	chr2	210673274	210673275	UNC80	285175	36556	CGI-N-Shore	FALSE	TRUE	FALSE
cg20139706	chr2	237068750	237068751	GBX2	2637	7900	CGI	FALSE	FALSE	TRUE
cg20225749	chr2	946127	946128	SNTG2	54221	-425	CGI	TRUE	FALSE	FALSE
cg20314884	chr2	220108094	220108095	GLB1L	79411	2035	CGI	FALSE	TRUE	FALSE
cg20340806	chr2	74405946	74405947	MOB1A	55233	47	CGI	TRUE	FALSE	FALSE
cg20365074	chr2	189157191	189157192	GULP1	51454	794	CGI	TRUE	TRUE	FALSE
cg20389472	chr2	171568526	171568527	LOC440925	440925	2549	CGI	FALSE	FALSE	TRUE
cg20391058	chr2	2295451	2295452	LOC730811	730811	-27551	CGI	FALSE	TRUE	FALSE
cg20398486	chr2	176944442	176944443	EVX2	344191	4246	CGI	FALSE	FALSE	TRUE
cg20457942	chr2	3605983	3605984	LOC100506054	100506054	6	CGI	TRUE	FALSE	FALSE
cg20608192	chr2	113194973	113194974	RGPD8	727851	-2910	CGI-S-Shelf	FALSE	FALSE	TRUE
cg20649017	chr2	176980837	176980838	HOXD10	3236	-653	CGI	TRUE	FALSE	FALSE
cg20679626	chr2	489360	489361	TMEM18	129787	188077	CGI	FALSE	FALSE	TRUE
cg20690483	chr2	96874741	96874742	STARD7	56910	-167	CGI	TRUE	TRUE	FALSE
cg20709008	chr2	182545934	182545935	NEUROD1	4760	-541	CGI	TRUE	FALSE	FALSE
cg20731257	chr2	87883497	87883498	MIR4435-1	100616499	-45775	CGI-N-Shore	FALSE	TRUE	FALSE
cg20804191	chr2	237076171	237076172	GBX2	2637	479	CGI	TRUE	FALSE	FALSE
cg20842253	chr2	27529788	27529789	UCN	7349	1340	CGI	FALSE	TRUE	FALSE
cg20852890	chr2	99552737	99552738	KIAA1211L	343990	-52	CGI	TRUE	FALSE	FALSE
cg20931705	chr2	101042998	101042999	CHST10	9486	-8867	CGI	FALSE	FALSE	TRUE
cg21061994	chr2	866867	866868	LOC339822	339822	-2754	CGI-S-Shore	FALSE	FALSE	TRUE
cg21076935	chr2	10861602	10861603	ATP6V1C2	245973	-171	CGI	TRUE	FALSE	FALSE
cg21082122	chr2	3307517	3307518	TSSC1	7260	74134	CGI	FALSE	TRUE	FALSE
cg21117965	chr2	220325369	220325370	SPEG	10290	25668	Non-CGI	TRUE	TRUE	FALSE
cg21122225	chr2	238832508	238832509	UBE2F-SCLY	100533179	-43077	CGI	FALSE	FALSE	TRUE
cg21149147	chr2	201753800	201753801	PPIL3	53938	47	CGI	TRUE	FALSE	FALSE
cg21233275	chr2	136634095	136634096	MCM6	4175	-83	CGI	TRUE	FALSE	FALSE
cg21239227	chr2	2111623	2111624	LOC730811	730811	-211379	Non-CGI	FALSE	TRUE	FALSE
cg21270243	chr2	216176248	216176249	ATIC	471	-429	CGI-N-Shore	TRUE	FALSE	FALSE
cg21273584	chr2	503065	503066	TMEM18	129787	174372	CGI	FALSE	FALSE	TRUE
cg21384492	chr2	241938321	241938322	SNED1	25992	65	CGI	TRUE	FALSE	FALSE
cg21450708	chr2	27008453	27008454	CENPA	1058	-427	CGI	TRUE	FALSE	FALSE
cg21485895	chr2	200321016	200321017	SATB2-AS1	150538	-11803	CGI	TRUE	TRUE	FALSE
cg21488538	chr2	98964436	98964437	CNGA3	1261	1817	CGI	FALSE	TRUE	FALSE
cg21550016	chr2	113992930	113992931	LOC654433	654433	-175	CGI	TRUE	TRUE	FALSE
cg21847751	chr2	232379328	232379329	LINC00471	151477	-277	CGI	TRUE	FALSE	FALSE
cg21855830	chr2	127963489	127963490	CYP27C1	339761	14163	CGI-S-Shore	TRUE	TRUE	FALSE
cg21949333	chr2	230136146	230136147	PID1	55022	-88	CGI	TRUE	FALSE	FALSE
cg21990808	chr2	228336774	228336775	AGFG1	3267	-112	CGI	TRUE	FALSE	FALSE
cg22016870	chr2	237980832	237980833	COPS8	10920	-13250	Non-CGI	FALSE	TRUE	FALSE
cg22112075	chr2	85658146	85658147	SH2D6	284948	12091	Non-CGI	FALSE	TRUE	FALSE
cg22116328	chr2	240868565	240868566	MIR4786	100616417	13944	CGI	FALSE	FALSE	TRUE
cg22157099	chr2	15830172	15830173	DDX1	1653	98401	Non-CGI	TRUE	FALSE	FALSE
cg22385827	chr2	211036478	211036479	KANSL1L	151050	-426	CGI	TRUE	FALSE	FALSE
cg22400015	chr2	220196714	220196715	RESP18	389075	1183	CGI	TRUE	TRUE	FALSE
cg22400703	chr2	68545995	68545996	CNRIP1	25927	1186	CGI	FALSE	TRUE	FALSE
cg22488859	chr2	38303831	38303832	CYP1B1	1545	-507	CGI-S-Shore	TRUE	FALSE	FALSE
cg22545206	chr2	118617499	118617500	DDX18	8886	45243	CGI	FALSE	FALSE	TRUE
cg22650617	chr2	71017541	71017542	FIGLA	344018	232	CGI	TRUE	FALSE	FALSE
cg22670147	chr2	115419740	115419741	DPP10	57628	219840	CGI	FALSE	TRUE	FALSE
cg22712983	chr2	219187374	219187375	TMBIM1	64114	-30093	CGI-N-Shore	TRUE	TRUE	FALSE
cg22866015	chr2	133174136	133174137	GPR39	2863	-9	CGI	TRUE	FALSE	FALSE
cg22903655	chr2	27580036	27580037	GTF3C2	2976	-167	CGI	TRUE	FALSE	FALSE
cg22923268	chr2	128784914	128784915	SAP130	79595	717	CGI	TRUE	TRUE	FALSE
cg23039201	chr2	27851887	27851888	CCDC121	79635	9	CGI	TRUE	TRUE	FALSE
cg23107161	chr2	27938371	27938372	SUPT7L	9913	-51921	CGI	FALSE	TRUE	FALSE
cg23279522	chr2	66659348	66659349	MEIS1	4211	-3182	CGI	FALSE	FALSE	TRUE
cg23279792	chr2	242987510	242987511	LOC728323	728323	-43332	CGI	FALSE	FALSE	TRUE
cg23348270	chr2	176969612	176969613	HOXD11	3237	361	CGI	FALSE	TRUE	FALSE
cg23420260	chr2	177053285	177053286	HOXD1	3231	-20	CGI	TRUE	TRUE	FALSE
cg23541422	chr2	8714363	8714364	ID2	3398	-107748	CGI	FALSE	FALSE	TRUE
cg23547017	chr2	177030171	177030172	HOXD3	3232	1365	CGI	FALSE	TRUE	FALSE
cg23621652	chr2	207630148	207630149	FASTKD2	22868	35	CGI	TRUE	FALSE	FALSE
cg23668184	chr2	5836713	5836714	SOX11	6664	3913	CGI	TRUE	FALSE	FALSE
cg23687269	chr2	732577	732578	TMEM18	129787	-55137	CGI	FALSE	FALSE	TRUE
cg23780110	chr2	26045244	26045245	ASXL2	55252	56066	CGI	FALSE	TRUE	FALSE
cg23807890	chr2	228736357	228736358	DAW1	164781	29	CGI	TRUE	FALSE	FALSE
cg23899450	chr2	242787324	242787325	PDCD1	5133	13732	CGI	FALSE	FALSE	TRUE
cg23923070	chr2	71558899	71558900	ZNF638	27332	55175	CGI	TRUE	TRUE	FALSE
cg23948843	chr2	164204752	164204753	FIGN	55137	387759	CGI	FALSE	FALSE	TRUE
cg23977821	chr2	24270452	24270453	C2orf44	80304	-155	CGI	TRUE	FALSE	FALSE
cg23978155	chr2	204400166	204400167	RAPH1	65059	-107	CGI	TRUE	FALSE	FALSE
cg24011073	chr2	11917787	11917788	MIR4262	100422996	59323	CGI	FALSE	TRUE	FALSE
cg24079702	chr2	106015771	106015772	FHL2	2274	39457	CGI	TRUE	TRUE	FALSE
cg24301350	chr2	200776224	200776225	C2orf69	205327	244	CGI	TRUE	FALSE	FALSE
cg24345062	chr2	200334439	200334440	SATB2	23314	1548	CGI	TRUE	TRUE	FALSE
cg24364967	chr2	55450577	55450578	RPS27A	6233	-8460	CGI	FALSE	TRUE	FALSE
cg24393552	chr2	239014989	239014990	ESPNL	339768	6037	Non-CGI	TRUE	TRUE	FALSE
cg24403033	chr2	112812772	112812773	TMEM87B	84910	-26	CGI	TRUE	FALSE	FALSE
cg24478096	chr2	160761085	160761086	LY75-CD302	100526664	180	CGI	FALSE	TRUE	FALSE
cg24603464	chr2	238395852	238395853	MLPH	79083	798	CGI	TRUE	TRUE	FALSE
cg24607290	chr2	64751503	64751504	AFTPH	54812	63	CGI	TRUE	FALSE	FALSE
cg24609304	chr2	32483287	32483288	NLRC4	58484	7523	CGI	FALSE	TRUE	FALSE
cg24617723	chr2	187714003	187714004	ZSWIM2	151112	-105	CGI	TRUE	FALSE	FALSE
cg24633978	chr2	176972581	176972582	HOXD11	3237	3330	CGI	TRUE	TRUE	FALSE
cg24673771	chr2	45180267	45180268	SIX3	6496	11229	CGI	FALSE	FALSE	TRUE
cg24688655	chr2	200331977	200331978	SATB2-AS1	150538	-842	CGI-N-Shore	TRUE	TRUE	FALSE
cg24744501	chr2	207024175	207024176	NDUFS1	4719	66	CGI	TRUE	FALSE	FALSE
cg24746100	chr2	88751786	88751787	FOXI3	344167	265	CGI	TRUE	FALSE	FALSE
cg24887265	chr2	45233528	45233529	SIX2	10736	3012	CGI	FALSE	TRUE	FALSE
cg24915947	chr2	210636783	210636784	UNC80	285175	65	CGI	TRUE	FALSE	FALSE
cg24927800	chr2	220283214	220283215	DES	1674	114	CGI	TRUE	FALSE	FALSE
cg24941797	chr2	241526520	241526521	CAPN10	11132	386	CGI	FALSE	TRUE	FALSE
cg25023043	chr2	84743684	84743685	DNAH6	1768	104	CGI	TRUE	FALSE	FALSE
cg25036284	chr2	26402008	26402009	GAREML	150946	6047	CGI	TRUE	TRUE	FALSE
cg25137582	chr2	157474713	157474714	GPD2	2820	182747	CGI	FALSE	FALSE	TRUE
cg25242471	chr2	219738732	219738733	WNT10A	80326	-6521	CGI	FALSE	TRUE	FALSE
cg25298319	chr2	233217079	233217080	ALPP	250	-26267	CGI	FALSE	FALSE	TRUE
cg25337514	chr2	9285975	9285976	ASAP2	8853	-60917	CGI-N-Shore	FALSE	FALSE	TRUE
cg25347419	chr2	177043501	177043502	HOXD1	3231	-9804	CGI-S-Shore	TRUE	TRUE	FALSE
cg25442273	chr2	132183108	132183109	LOC401010	401010	19357	CGI-S-Shore	FALSE	FALSE	TRUE
cg25479788	chr2	79220217	79220218	REG3G	130120	-32607	CGI	FALSE	FALSE	TRUE
cg25568091	chr2	113032874	113032875	ZC3H6	376940	-302	CGI	TRUE	FALSE	FALSE
cg25711575	chr2	178937477	178937478	PDE11A	50940	35587	CGI	TRUE	TRUE	FALSE
cg25793693	chr2	166810089	166810090	TTC21B	79809	257	CGI	FALSE	TRUE	FALSE
cg25878063	chr2	159736477	159736478	DAPL1	92196	84647	CGI	FALSE	FALSE	TRUE
cg25928603	chr2	200323017	200323018	SATB2-AS1	150538	-9802	CGI	TRUE	TRUE	FALSE
cg25942990	chr2	177014996	177014997	MIR10B	406903	-33	CGI	TRUE	FALSE	FALSE
cg25950548	chr2	70475801	70475802	TIA1	7072	-21	CGI	TRUE	FALSE	FALSE
cg25953239	chr2	176982342	176982343	HOXD10	3236	849	CGI	FALSE	TRUE	FALSE
cg26012578	chr2	122125185	122125186	TFCP2L1	29842	-82406	Non-CGI	FALSE	TRUE	FALSE
cg26095658	chr2	71017887	71017888	FIGLA	344018	-111	CGI	TRUE	FALSE	FALSE
cg26097549	chr2	36582467	36582468	LOC100288911	100288911	244	CGI	TRUE	FALSE	FALSE
cg26149275	chr2	176950007	176950008	EVX2	344191	-1316	CGI	TRUE	FALSE	FALSE
cg26153054	chr2	132152814	132152815	LOC389043	389043	-7658	CGI	FALSE	FALSE	TRUE
cg26359150	chr2	145281519	145281520	ZEB2-AS1	100303491	-3052	CGI	FALSE	FALSE	TRUE
cg26467069	chr2	151344296	151344297	RND3	390	-86	CGI-S-Shore	TRUE	FALSE	FALSE
cg26585007	chr2	112655072	112655073	MERTK	10461	-1117	CGI	TRUE	FALSE	FALSE
cg26627956	chr2	202004766	202004767	CFLAR-AS1	65072	17747	CGI	TRUE	TRUE	FALSE
cg26641275	chr2	239971554	239971555	MIR4440	100616397	19054	CGI	FALSE	TRUE	FALSE
cg26645509	chr2	118944144	118944145	INSIG2	51141	98093	CGI	FALSE	FALSE	TRUE
cg26890182	chr2	135621176	135621177	ACMSD	130013	24989	Non-CGI	FALSE	TRUE	FALSE
cg26983710	chr2	154728202	154728203	GALNT13	114805	-222	CGI	TRUE	FALSE	FALSE
cg27005255	chr2	198365139	198365140	HSPD1	3329	-140	CGI	TRUE	FALSE	FALSE
cg27211198	chr2	121776456	121776457	TFCP2L1	29842	266320	CGI	FALSE	FALSE	TRUE
cg27235690	chr2	55496390	55496391	MTIF2	4528	-5	CGI	TRUE	FALSE	FALSE
cg27252970	chr2	220348312	220348313	GMPPA	29926	-15273	CGI	FALSE	TRUE	FALSE
cg27254442	chr2	176962284	176962285	HOXD12	3238	-2244	CGI	FALSE	FALSE	TRUE
cg27254871	chr2	206750458	206750459	INO80D	54891	200446	CGI-N-Shore	FALSE	FALSE	TRUE
cg27403609	chr2	11101403	11101404	KCNF1	3754	49339	CGI	FALSE	FALSE	TRUE
cg27405400	chr2	127839539	127839540	BIN1	274	25362	CGI-N-Shelf	TRUE	TRUE	FALSE
cg27406975	chr2	172955512	172955513	DLX1	1745	5303	CGI	FALSE	FALSE	TRUE
cg27419327	chr2	241853823	241853824	C2orf54	79919	-18249	CGI	FALSE	FALSE	TRUE
cg27485108	chr2	26951130	26951131	KCNK3	3777	35548	CGI	FALSE	TRUE	FALSE
cg27533019	chr2	99553078	99553079	KIAA1211L	343990	-393	CGI	TRUE	FALSE	FALSE
cg27604702	chr2	233793088	233793089	C2orf82	389084	58093	CGI	TRUE	TRUE	FALSE
cg27664844	chr2	119532486	119532487	EN1	2019	73271	CGI	FALSE	FALSE	TRUE
cg00323305	chr3	24537182	24537183	THRB	7068	-728	CGI	TRUE	FALSE	FALSE
cg00375819	chr3	11033866	11033867	SLC6A1	6529	-552	CGI-N-Shore	TRUE	FALSE	FALSE
cg00735667	chr3	74663796	74663797	CNTN3	5067	-93452	CGI	FALSE	FALSE	TRUE
cg00813746	chr3	50275558	50275559	GNAI2	2771	11833	CGI	FALSE	TRUE	FALSE
cg00908291	chr3	140771786	140771787	SPSB4	92369	1042	CGI	FALSE	TRUE	FALSE
cg00968241	chr3	156543833	156543834	LEKR1	389170	-261	CGI-N-Shore	TRUE	FALSE	FALSE
cg01079515	chr3	195576629	195576630	MUC4	4585	-37784	CGI	FALSE	FALSE	TRUE
cg01296889	chr3	54122032	54122033	CACNA2D3	55799	-34659	CGI	FALSE	FALSE	TRUE
cg01379240	chr3	138666144	138666145	C3orf72	401089	67	CGI	TRUE	FALSE	FALSE
cg01566555	chr3	125931744	125931745	ALDH1L1	10840	-32258	CGI-N-Shore	FALSE	FALSE	TRUE
cg01822130	chr3	96534005	96534006	EPHA6	285220	579	CGI	FALSE	TRUE	FALSE
cg01825295	chr3	147131617	147131618	ZIC1	7545	4435	CGI-S-Shore	FALSE	TRUE	FALSE
cg01845051	chr3	41361925	41361926	CTNNB1	1499	125523	Non-CGI	FALSE	TRUE	FALSE
cg01884537	chr3	9005400	9005401	RAD18	56852	-240	CGI	TRUE	FALSE	FALSE
cg01896761	chr3	13590444	13590445	FBLN2	2199	16619	CGI-N-Shore	TRUE	TRUE	FALSE
cg02202980	chr3	119421868	119421869	MAATS1	89876	0	CGI-S-Shore	TRUE	FALSE	FALSE
cg02221302	chr3	62304629	62304630	PTPRG-AS1	100506994	-6	CGI	TRUE	FALSE	FALSE
cg02222844	chr3	48694451	48694452	MIR4793	100616112	-12737	CGI	FALSE	TRUE	FALSE
cg02231066	chr3	52567130	52567131	NT5DC2	64943	1961	CGI	FALSE	TRUE	FALSE
cg02306995	chr3	122635049	122635050	LOC100129550	100129550	29688	CGI-S-Shelf	FALSE	TRUE	FALSE
cg02312542	chr3	126064371	126064372	KLF15	28999	11863	CGI-S-Shore	FALSE	TRUE	FALSE
cg02398045	chr3	148804489	148804490	HLTF	6596	-147	CGI	TRUE	FALSE	FALSE
cg02567082	chr3	186080180	186080181	DGKG	1608	-156	CGI	TRUE	FALSE	FALSE
cg02569554	chr3	197280980	197280981	BDH1	622	19212	CGI-N-Shore	FALSE	TRUE	FALSE
cg02605996	chr3	148664754	148664755	GYG1	2992	-44439	CGI	FALSE	FALSE	TRUE
cg02721516	chr3	122920941	122920942	SEC22A	26984	166	CGI	FALSE	TRUE	FALSE
cg02741226	chr3	118892305	118892306	UPK1B	7348	-118	Non-CGI	TRUE	FALSE	FALSE
cg02782426	chr3	40428986	40428987	ENTPD3	956	312	CGI	FALSE	TRUE	FALSE
cg02803925	chr3	195974300	195974301	SLC51A	200931	30916	CGI-S-Shelf	FALSE	TRUE	FALSE
cg03414569	chr3	184971699	184971700	EHHADH	1962	185	CGI	TRUE	TRUE	FALSE
cg03540175	chr3	49236946	49236947	CCDC36	339834	1084	CGI	TRUE	TRUE	FALSE
cg03556653	chr3	115231501	115231502	GAP43	2596	-110648	CGI	FALSE	FALSE	TRUE
cg03679504	chr3	46621556	46621557	LRRC2	79442	14	CGI-S-Shelf	TRUE	TRUE	FALSE
cg03760927	chr3	100120682	100120683	TOMM70A	9868	-439	CGI	TRUE	FALSE	FALSE
cg03792947	chr3	107244719	107244720	BBX	56987	2935	CGI	FALSE	TRUE	FALSE
cg03862437	chr3	194353432	194353433	TMEM44	93109	984	CGI-S-Shore	FALSE	TRUE	FALSE
cg03863817	chr3	96495925	96495926	EPHA6	285220	-37498	CGI	FALSE	FALSE	TRUE
cg03881775	chr3	147111135	147111136	ZIC4	84107	13459	CGI	TRUE	TRUE	FALSE
cg03986829	chr3	62358234	62358235	FEZF2	55079	954	CGI	TRUE	TRUE	FALSE
cg04222358	chr3	2140256	2140257	CNTN4	152330	-292	CGI	TRUE	FALSE	FALSE
cg04231166	chr3	185655124	185655125	TRA2B	6434	798	CGI	TRUE	TRUE	FALSE
cg04322483	chr3	42544020	42544021	VIPR1	7433	13228	CGI	TRUE	TRUE	FALSE
cg04343162	chr3	196044948	196044949	TCTEX1D2	255758	215	CGI	TRUE	TRUE	FALSE
cg04457317	chr3	50567932	50567933	CACNA2D2	9254	-27039	CGI	FALSE	FALSE	TRUE
cg04467162	chr3	128764824	128764825	GP9	2815	-14819	CGI	FALSE	FALSE	TRUE
cg04469346	chr3	126373967	126373968	TXNRD3	114112	0	CGI	TRUE	FALSE	FALSE
cg04554240	chr3	138170552	138170553	ESYT3	83850	17136	CGI-N-Shore	FALSE	TRUE	FALSE
cg04562217	chr3	79815718	79815719	ROBO1	6091	1339	CGI	FALSE	TRUE	FALSE
cg04678713	chr3	197236889	197236890	BDH1	622	63303	CGI	FALSE	TRUE	FALSE
cg04807594	chr3	148415747	148415748	AGTR1	185	88	CGI	TRUE	FALSE	FALSE
cg04924511	chr3	10334731	10334732	GHRL	51738	-99	Non-CGI	TRUE	TRUE	FALSE
cg05142211	chr3	181430485	181430486	SOX2	6657	772	CGI	TRUE	TRUE	FALSE
cg05431334	chr3	25831755	25831756	OXSM	54995	191	CGI-S-Shore	TRUE	TRUE	FALSE
cg05551922	chr3	49396232	49396233	GPX1	2876	-440	CGI	TRUE	FALSE	FALSE
cg05666842	chr3	126423272	126423273	CHCHD6	84303	153	CGI	FALSE	TRUE	FALSE
cg05726764	chr3	179399579	179399580	USP13	8975	28645	CGI	FALSE	TRUE	FALSE
cg05768427	chr3	127634188	127634189	KBTBD12	166348	-128	CGI	TRUE	FALSE	FALSE
cg05882938	chr3	186857284	186857285	RPL39L	116832	-20	CGI	TRUE	FALSE	FALSE
cg06371443	chr3	121949308	121949309	CASR	846	46777	CGI-S-Shore	FALSE	TRUE	FALSE
cg06598836	chr3	2140699	2140700	CNTN4	152330	148	CGI	FALSE	TRUE	FALSE
cg06637517	chr3	52407344	52407345	BAP1	8314	36663	CGI	FALSE	TRUE	FALSE
cg06705862	chr3	128151236	128151237	DNAJB8-AS1	285224	-31199	CGI-N-Shore	FALSE	FALSE	TRUE
cg06825957	chr3	49591628	49591629	BSN-AS2	100132677	169	CGI	TRUE	FALSE	FALSE
cg06842518	chr3	197476315	197476316	FYTTD1	84248	-107	CGI	TRUE	FALSE	FALSE
cg07099588	chr3	126006495	126006496	KLF15	28999	69739	CGI-N-Shore	FALSE	FALSE	TRUE
cg07225362	chr3	9975367	9975368	CRELD1	78987	-155	CGI	TRUE	TRUE	FALSE
cg07330230	chr3	125899925	125899926	ALDH1L1	10840	-439	CGI	TRUE	TRUE	FALSE
cg07351192	chr3	5137773	5137774	ARL8B	55207	-26155	CGI	FALSE	FALSE	TRUE
cg07552157	chr3	142720316	142720317	LOC100289361	100289361	-6	CGI	TRUE	FALSE	FALSE
cg07693931	chr3	158449734	158449735	RARRES1	5918	539	CGI	FALSE	TRUE	FALSE
cg07755390	chr3	124931736	124931737	SLC12A8	84561	66353	CGI	TRUE	TRUE	FALSE
cg07805480	chr3	195544580	195544581	MUC4	4585	-5735	CGI-N-Shore	FALSE	FALSE	TRUE
cg07805699	chr3	159481815	159481816	IL12A	3592	-224806	CGI	TRUE	TRUE	FALSE
cg07865967	chr3	5028809	5028810	BHLHE40-AS1	100507582	-7162	CGI	FALSE	FALSE	TRUE
cg07889826	chr3	50127152	50127153	RBM5	10181	810	CGI-S-Shore	FALSE	TRUE	FALSE
cg08281123	chr3	19791304	19791305	EFHB	151651	197195	CGI	FALSE	FALSE	TRUE
cg08421685	chr3	238611	238612	CHL1	10752	331	CGI	TRUE	FALSE	FALSE
cg08443605	chr3	24872319	24872320	MIR4792	100616448	-309392	CGI	FALSE	FALSE	TRUE
cg08668199	chr3	127795571	127795572	SEC61A1	29927	24358	CGI	FALSE	TRUE	FALSE
cg08888203	chr3	10149979	10149980	FANCD2OS	115795	-63	CGI	TRUE	FALSE	FALSE
cg08942682	chr3	197409980	197409981	MIR922	100126321	-8532	CGI	FALSE	TRUE	FALSE
cg08978399	chr3	194835888	194835889	XXYLT1	152002	156005	CGI	FALSE	TRUE	FALSE
cg09221314	chr3	69063234	69063235	EOGT	285203	-459	CGI-S-Shore	TRUE	FALSE	FALSE
cg09435674	chr3	46933864	46933865	PTH1R	5745	14627	CGI	FALSE	TRUE	FALSE
cg09618015	chr3	183959073	183959074	MIR1224	100187716	-118	CGI-N-Shore	TRUE	TRUE	FALSE
cg09805010	chr3	24536077	24536078	THRB	7068	374	CGI	FALSE	TRUE	FALSE
cg10237854	chr3	195539463	195539464	MUC4	4585	-618	CGI-S-Shelf	TRUE	FALSE	FALSE
cg10347032	chr3	183543704	183543705	MAP6D1	79929	-310	CGI	TRUE	FALSE	FALSE
cg10349197	chr3	52801074	52801075	NEK4	6787	3889	CGI-N-Shelf	FALSE	TRUE	FALSE
cg10545536	chr3	45635693	45635694	LIMD1	8994	-628	CGI	TRUE	FALSE	FALSE
cg10729496	chr3	10149963	10149964	FANCD2OS	115795	-47	CGI	TRUE	FALSE	FALSE
cg10908625	chr3	152881181	152881182	RAP2B	5912	1151	CGI	TRUE	FALSE	FALSE
cg10923475	chr3	194406558	194406559	FAM43A	131583	-62	CGI	TRUE	FALSE	FALSE
cg10996014	chr3	49449848	49449849	TCTA	6988	208	CGI	TRUE	FALSE	FALSE
cg11161853	chr3	67705044	67705045	SUCLG2	8801	-5	CGI	TRUE	FALSE	FALSE
cg11235498	chr3	140771656	140771657	SPSB4	92369	912	CGI	FALSE	TRUE	FALSE
cg11384281	chr3	64009226	64009227	PSMD6	9861	430	CGI	TRUE	TRUE	FALSE
cg11585767	chr3	112280782	112280783	SLC35A5	55032	-111	CGI	TRUE	FALSE	FALSE
cg11603443	chr3	58572520	58572521	FAM107A	11170	40815	CGI	FALSE	TRUE	FALSE
cg11612799	chr3	113933175	113933176	DRD3	1814	-14920	Non-CGI	TRUE	FALSE	FALSE
cg11902004	chr3	50263894	50263895	GNAI2	2771	169	CGI	TRUE	FALSE	FALSE
cg11921736	chr3	113160437	113160438	WDR52	55779	-75	CGI	TRUE	FALSE	FALSE
cg12065366	chr3	238618	238619	CHL1	10752	338	CGI	TRUE	FALSE	FALSE
cg12121643	chr3	185911796	185911797	ETV5	2119	-84894	CGI	FALSE	TRUE	FALSE
cg12370175	chr3	123031942	123031943	SEC22A	26984	111167	Non-CGI	FALSE	TRUE	FALSE
cg12371681	chr3	125239117	125239118	SNX4	8723	-58	CGI	TRUE	FALSE	FALSE
cg12392528	chr3	12838028	12838029	CAND2	23066	-141	CGI	TRUE	FALSE	FALSE
cg12468774	chr3	49236860	49236861	CCDC36	339834	998	CGI	TRUE	TRUE	FALSE
cg12612091	chr3	52279902	52279903	PPM1M	132160	92	CGI	TRUE	FALSE	FALSE
cg12698784	chr3	119813316	119813317	GSK3B	2932	-51	CGI	TRUE	FALSE	FALSE
cg12902206	chr3	52351487	52351488	DNAH1	25981	1151	CGI	TRUE	TRUE	FALSE
cg12934382	chr3	51741135	51741136	GRM2	2912	53	CGI	TRUE	FALSE	FALSE
cg12987059	chr3	33067108	33067109	TMPPE	643853	71204	CGI-N-Shore	FALSE	TRUE	FALSE
cg13018177	chr3	66018851	66018852	MAGI1	9223	5656	Non-CGI	FALSE	TRUE	FALSE
cg13024018	chr3	133380790	133380791	TOPBP1	11073	-52	CGI	TRUE	FALSE	FALSE
cg13153394	chr3	45209196	45209197	CDCP1	64866	-21281	Non-CGI	FALSE	FALSE	TRUE
cg13234063	chr3	134092608	134092609	AMOTL2	51421	1649	CGI	FALSE	TRUE	FALSE
cg13239297	chr3	50192725	50192726	SEMA3F	6405	-121	CGI	TRUE	TRUE	FALSE
cg13264183	chr3	126194992	126194993	ZXDC	79364	-229	CGI	TRUE	FALSE	FALSE
cg13323489	chr3	193587780	193587781	DPPA2P3	100128023	124245	CGI	FALSE	FALSE	TRUE
cg13331200	chr3	85008587	85008588	CADM2	253559	453	CGI	TRUE	FALSE	FALSE
cg13334788	chr3	197232612	197232613	BDH1	622	67580	CGI	FALSE	FALSE	TRUE
cg13562542	chr3	71803339	71803340	GPR27	2850	137	CGI	TRUE	TRUE	FALSE
cg13602813	chr3	13920840	13920841	WNT7A	7476	776	CGI	FALSE	TRUE	FALSE
cg13766687	chr3	57200331	57200332	IL17RD	54756	3998	CGI-S-Shore	TRUE	TRUE	FALSE
cg13889508	chr3	11059010	11059011	SLC6A1	6529	24589	CGI	FALSE	TRUE	FALSE
cg13960678	chr3	121980748	121980749	CSTA	1475	-63261	CGI	FALSE	TRUE	FALSE
cg14016680	chr3	197687242	197687243	LMLN	89782	170	CGI	TRUE	TRUE	FALSE
cg14051544	chr3	170303286	170303287	SLC7A14	57709	575	CGI	FALSE	TRUE	FALSE
cg14054013	chr3	49894103	49894104	TRAIP	10293	-110	CGI	TRUE	FALSE	FALSE
cg14565407	chr3	23032259	23032260	UBE2E2	7325	-212392	CGI	FALSE	FALSE	TRUE
cg14611399	chr3	87138203	87138204	VGLL3	389136	-97945	CGI	TRUE	FALSE	FALSE
cg14659179	chr3	119859180	119859181	GSK3B	2932	-45915	CGI	FALSE	FALSE	TRUE
cg14727205	chr3	57543027	57543028	PDE12	201626	1045	CGI	TRUE	FALSE	FALSE
cg14750948	chr3	147130477	147130478	ZIC1	7545	3295	CGI	FALSE	TRUE	FALSE
cg14781521	chr3	129063090	129063091	H1FX	8971	-27969	CGI	FALSE	FALSE	TRUE
cg14784335	chr3	27770490	27770491	EOMES	8320	-6283	CGI	FALSE	FALSE	TRUE
cg14875327	chr3	197081654	197081655	DLG1	1739	-55510	Non-CGI	FALSE	FALSE	TRUE
cg14975798	chr3	111835839	111835840	MIR567	693152	4190	Non-CGI	FALSE	TRUE	FALSE
cg15028458	chr3	58860290	58860291	C3orf67	200844	175466	Non-CGI	FALSE	TRUE	FALSE
cg15038286	chr3	128200723	128200724	GATA2	2624	11305	CGI-N-Shore	FALSE	TRUE	FALSE
cg15264020	chr3	61674210	61674211	PTPRG	5793	126966	Non-CGI	FALSE	TRUE	FALSE
cg15320272	chr3	48677773	48677774	MIR4793	100616112	3938	CGI	FALSE	TRUE	FALSE
cg15325658	chr3	79815782	79815783	ROBO1	6091	1275	CGI	FALSE	TRUE	FALSE
cg15511738	chr3	48700027	48700028	CELSR3	1951	9952	CGI	TRUE	TRUE	FALSE
cg15579376	chr3	138154754	138154755	ESYT3	83850	1338	CGI-S-Shore	FALSE	TRUE	FALSE
cg15593298	chr3	142681996	142681997	PAQR9	344838	180	CGI	TRUE	FALSE	FALSE
cg15738605	chr3	186080208	186080209	DGKG	1608	-184	CGI	TRUE	FALSE	FALSE
cg15739717	chr3	136537790	136537791	SLC35G2	80723	-69	CGI	TRUE	FALSE	FALSE
cg15764058	chr3	66024691	66024692	MAGI1	9223	-181	CGI	TRUE	FALSE	FALSE
cg15874300	chr3	3221199	3221200	CRBN	51185	200	CGI	FALSE	TRUE	FALSE
cg15954675	chr3	63542363	63542364	SNTN	132203	-95979	Non-CGI	FALSE	TRUE	FALSE
cg15975282	chr3	170588055	170588056	RPL22L1	200916	-9	CGI	TRUE	FALSE	FALSE
cg16225429	chr3	50365552	50365553	TUSC2	11334	114	CGI	TRUE	FALSE	FALSE
cg16266007	chr3	16646983	16646984	DAZL	1618	21	CGI	TRUE	FALSE	FALSE
cg16270079	chr3	48456686	48456687	PLXNB1	5364	14772	Non-CGI	TRUE	TRUE	FALSE
cg16276063	chr3	181421703	181421704	SOX2	6657	-8007	CGI	FALSE	TRUE	FALSE
cg16532176	chr3	156393537	156393538	TIPARP-AS1	100287227	-34	CGI	TRUE	TRUE	FALSE
cg16619395	chr3	154145868	154145869	GPR149	344758	1634	CGI	FALSE	TRUE	FALSE
cg16768018	chr3	147108843	147108844	ZIC4	84107	15751	CGI	FALSE	TRUE	FALSE
cg16771578	chr3	125899895	125899896	ALDH1L1	10840	-409	CGI	TRUE	TRUE	FALSE
cg16795821	chr3	142720237	142720238	LOC100289361	100289361	70	CGI	TRUE	FALSE	FALSE
cg16811230	chr3	39149235	39149236	TTC21A	199223	82	CGI	TRUE	FALSE	FALSE
cg16817826	chr3	62356323	62356324	FEZF2	55079	2865	CGI	FALSE	TRUE	FALSE
cg16927040	chr3	187388128	187388129	SST	6750	71	CGI	TRUE	FALSE	FALSE
cg16951566	chr3	39093671	39093672	WDR48	57599	163	CGI	FALSE	TRUE	FALSE
cg16972079	chr3	183853295	183853296	EIF2B5	8893	484	CGI	TRUE	FALSE	FALSE
cg17199247	chr3	3842717	3842718	LRRN1	57633	1595	CGI	TRUE	TRUE	FALSE
cg17246714	chr3	55519186	55519187	WNT5A	7474	2143	CGI	FALSE	TRUE	FALSE
cg17280346	chr3	147126703	147126704	ZIC1	7545	-476	CGI	TRUE	FALSE	FALSE
cg17293936	chr3	185911519	185911520	ETV5	2119	-84617	CGI	FALSE	TRUE	FALSE
cg17334114	chr3	133646504	133646505	C3orf36	80111	2150	CGI	FALSE	FALSE	TRUE
cg17656513	chr3	47324533	47324534	KIF9	64147	-195	CGI	TRUE	FALSE	FALSE
cg17978425	chr3	10289658	10289659	TATDN2	9797	-517	CGI-N-Shore	TRUE	FALSE	FALSE
cg18004856	chr3	46029278	46029279	FYCO1	79443	8027	Non-CGI	FALSE	TRUE	FALSE
cg18094781	chr3	25469430	25469431	MIR4442	100616477	236998	CGI	TRUE	TRUE	FALSE
cg18115215	chr3	132757090	132757091	TMEM108	66000	-79	CGI	TRUE	FALSE	FALSE
cg18128437	chr3	167453397	167453398	SERPINI1	5274	-33	CGI	TRUE	FALSE	FALSE
cg18339722	chr3	58308388	58308389	PXK	54899	-10227	Non-CGI	FALSE	FALSE	TRUE
cg18516471	chr3	42978248	42978249	KRBOX1	100506243	413	CGI	TRUE	TRUE	FALSE
cg18530113	chr3	123752536	123752537	KALRN	8997	-4	CGI	TRUE	FALSE	FALSE
cg18647275	chr3	49840361	49840362	FAM212A	389119	-324	CGI	TRUE	FALSE	FALSE
cg18698690	chr3	129612569	129612570	LOC100507032	100507032	-143	CGI	TRUE	FALSE	FALSE
cg18813448	chr3	137893807	137893808	DBR1	51163	-15	CGI	TRUE	FALSE	FALSE
cg19029181	chr3	147130536	147130537	ZIC1	7545	3354	CGI	FALSE	TRUE	FALSE
cg19032951	chr3	185541450	185541451	IGF2BP2	10644	1375	CGI	FALSE	TRUE	FALSE
cg19456938	chr3	114012806	114012807	TIGIT	201633	651	Non-CGI	TRUE	FALSE	FALSE
cg19547144	chr3	129147553	129147554	EFCAB12	90288	-58	CGI	TRUE	FALSE	FALSE
cg19604222	chr3	99979547	99979548	TBC1D23	55773	-137	CGI	TRUE	FALSE	FALSE
cg19631064	chr3	197807355	197807356	ANKRD18DP	348840	185	CGI	TRUE	FALSE	FALSE
cg19727641	chr3	138067606	138067607	MRAS	22808	1115	CGI	TRUE	TRUE	FALSE
cg19815327	chr3	32023353	32023354	OSBPL10	114884	-10	CGI	TRUE	FALSE	FALSE
cg19932227	chr3	119298432	119298433	ADPRH	141	-89	CGI	TRUE	FALSE	FALSE
cg19973659	chr3	129612905	129612906	LOC100507032	100507032	190	CGI-S-Shore	TRUE	TRUE	FALSE
cg20103104	chr3	97541445	97541446	ARL6	84100	57849	CGI	FALSE	TRUE	FALSE
cg20402382	chr3	49711530	49711531	APEH	327	94	CGI	TRUE	FALSE	FALSE
cg20498859	chr3	154145810	154145811	GPR149	344758	1692	CGI	FALSE	TRUE	FALSE
cg20559608	chr3	131754012	131754013	CPNE4	131034	250240	CGI	TRUE	TRUE	FALSE
cg20850873	chr3	10149803	10149804	FANCD2OS	115795	110	CGI-N-Shore	TRUE	FALSE	FALSE
cg20888142	chr3	12045662	12045663	SYN2	6854	-198	CGI	TRUE	FALSE	FALSE
cg20953187	chr3	45837898	45837899	SLC6A20	54716	135	CGI	TRUE	FALSE	FALSE
cg21197774	chr3	192126742	192126743	FGF12	2257	318644	CGI	TRUE	TRUE	FALSE
cg21211594	chr3	105587814	105587815	CBLB	868	450	CGI	TRUE	TRUE	FALSE
cg21217577	chr3	129694683	129694684	TRH	7200	1568	CGI	FALSE	TRUE	FALSE
cg21459229	chr3	137834755	137834756	DZIP1L	199221	-303	CGI-S-Shore	TRUE	FALSE	FALSE
cg21496658	chr3	154797677	154797678	MME	4311	55763	CGI	TRUE	TRUE	FALSE
cg21574739	chr3	39199069	39199070	CSRNP1	64651	-3015	CGI-S-Shelf	FALSE	FALSE	TRUE
cg21664636	chr3	70432664	70432665	MITF	4286	644077	Non-CGI	FALSE	FALSE	TRUE
cg21741562	chr3	87138387	87138388	VGLL3	389136	-98129	CGI	TRUE	FALSE	FALSE
cg21798964	chr3	138553774	138553775	PIK3CB	5291	-75588	CGI	FALSE	FALSE	TRUE
cg21818713	chr3	22413582	22413583	ZNF385D	79750	539	CGI	FALSE	TRUE	FALSE
cg22092811	chr3	99595145	99595146	CMSS1	84319	58466	CGI	TRUE	TRUE	FALSE
cg22304507	chr3	136537863	136537864	SLC35G2	80723	1	CGI	TRUE	FALSE	FALSE
cg22613854	chr3	194705954	194705955	LOC100507391	100507391	276803	CGI	FALSE	FALSE	TRUE
cg22617878	chr3	10417183	10417184	MIR885	100126334	19061	Non-CGI	FALSE	TRUE	FALSE
cg22706947	chr3	50336986	50336987	NAT6	24142	-86	CGI	TRUE	FALSE	FALSE
cg22816651	chr3	47554949	47554950	ELP6	54859	248	CGI	FALSE	TRUE	FALSE
cg22818988	chr3	3168509	3168510	TRNT1	51095	-89	CGI	TRUE	FALSE	FALSE
cg22934568	chr3	48884614	48884615	PRKAR2A	5576	654	CGI	TRUE	TRUE	FALSE
cg22988851	chr3	41752483	41752484	ULK4	54986	251175	Non-CGI	FALSE	TRUE	FALSE
cg23182840	chr3	4344661	4344662	SETMAR	6419	-325	CGI-N-Shore	TRUE	TRUE	FALSE
cg23243038	chr3	32859558	32859559	TRIM71	131405	47	CGI	TRUE	FALSE	FALSE
cg23500122	chr3	172167610	172167611	GHSR	2693	-1363	CGI	TRUE	FALSE	FALSE
cg23513930	chr3	10334717	10334718	GHRL	51738	-85	Non-CGI	TRUE	TRUE	FALSE
cg23548719	chr3	101395035	101395036	LOC100009676	100009676	-237	CGI	TRUE	TRUE	FALSE
cg23727520	chr3	121741145	121741146	ILDR1	286676	-17	CGI	TRUE	FALSE	FALSE
cg23816347	chr3	126113640	126113641	CCDC37	348807	-140	CGI	TRUE	FALSE	FALSE
cg24029308	chr3	135684468	135684469	PPP2R3A	5523	-45	CGI	TRUE	FALSE	FALSE
cg24072474	chr3	140770013	140770014	SPSB4	92369	-728	CGI	TRUE	FALSE	FALSE
cg24082730	chr3	126076366	126076367	KLF15	28999	-129	CGI	TRUE	FALSE	FALSE
cg24086758	chr3	49507844	49507845	DAG1	1605	1707	CGI	TRUE	TRUE	FALSE
cg24279418	chr3	13974286	13974287	FGD5P1	100132526	-265	CGI	TRUE	FALSE	FALSE
cg24308560	chr3	49941425	49941426	MST1R	4486	-118	CGI-S-Shore	TRUE	FALSE	FALSE
cg24631360	chr3	111698088	111698089	ABHD10	55347	259	CGI	FALSE	TRUE	FALSE
cg24672173	chr3	40657199	40657200	ZNF621	285268	90822	CGI	FALSE	FALSE	TRUE
cg24771349	chr3	187457475	187457476	BCL6	604	6036	CGI	FALSE	TRUE	FALSE
cg24837026	chr3	155607265	155607266	GMPS	8833	18939	Non-CGI	FALSE	TRUE	FALSE
cg24847685	chr3	147087653	147087654	ZIC4	84107	36941	CGI	FALSE	FALSE	TRUE
cg24902039	chr3	38691248	38691249	SCN5A	6331	-83	CGI	TRUE	FALSE	FALSE
cg24945701	chr3	62362783	62362784	FEZF2	55079	-3592	CGI	FALSE	FALSE	TRUE
cg24950336	chr3	113464879	113464880	NAA50	80218	239	CGI	TRUE	FALSE	FALSE
cg25145905	chr3	9975420	9975421	CRELD1	78987	-102	CGI	TRUE	TRUE	FALSE
cg25333181	chr3	129290604	129290605	H1FOO	132243	28546	CGI-S-Shore	FALSE	TRUE	FALSE
cg25347958	chr3	166834160	166834161	ZBBX	79740	263923	Non-CGI	FALSE	FALSE	TRUE
cg25509174	chr3	142607511	142607512	PCOLCE2	26577	532	CGI	FALSE	TRUE	FALSE
cg25528121	chr3	14860793	14860794	FGD5	152273	323	CGI-N-Shore	TRUE	FALSE	FALSE
cg25598371	chr3	193854008	193854009	HES1	3280	76	CGI	TRUE	FALSE	FALSE
cg25805709	chr3	44596770	44596771	ZKSCAN7	55888	56	CGI	TRUE	FALSE	FALSE
cg25870420	chr3	37493949	37493950	ITGA9	3680	135	CGI	TRUE	FALSE	FALSE
cg26058714	chr3	168864111	168864112	MECOM	2122	517450	CGI	TRUE	TRUE	FALSE
cg26076428	chr3	127175109	127175110	TPRA1	131601	134457	CGI-S-Shore	FALSE	FALSE	TRUE
cg26107590	chr3	57261519	57261520	APPL1	26060	-244	CGI	TRUE	FALSE	FALSE
cg26115216	chr3	138739916	138739917	PRR23B	389151	-147	CGI-S-Shore	TRUE	FALSE	FALSE
cg26115449	chr3	180707572	180707573	DNAJC19	131118	-9	CGI	TRUE	FALSE	FALSE
cg26151355	chr3	183226025	183226026	KLHL6	89857	47472	CGI	FALSE	TRUE	FALSE
cg27014380	chr3	133393454	133393455	TOPBP1	11073	-12716	CGI	FALSE	FALSE	TRUE
cg27199820	chr3	6903019	6903020	GRM7	2917	216	CGI	TRUE	FALSE	FALSE
cg27237834	chr3	132165326	132165327	DNAJC13	23317	28772	Non-CGI	FALSE	TRUE	FALSE
cg27326062	chr3	109115422	109115423	FLJ25363	401082	-13413	CGI	FALSE	FALSE	TRUE
cg27351619	chr3	42700108	42700109	ZBTB47	92999	4931	CGI	FALSE	TRUE	FALSE
cg27353899	chr3	195488922	195488923	MUC20	200958	41168	CGI	FALSE	TRUE	FALSE
cg27363788	chr3	197500836	197500837	LRCH3	84859	-17307	CGI	FALSE	TRUE	FALSE
cg27364162	chr3	55517806	55517807	WNT5A	7474	3523	CGI	FALSE	TRUE	FALSE
cg27400923	chr3	185826929	185826930	ETV5	2119	-27	CGI	TRUE	FALSE	FALSE
cg27495769	chr3	192636118	192636119	MB21D2	151963	-167	CGI	TRUE	FALSE	FALSE
cg27575495	chr3	146490184	146490185	PLSCR5	389158	-166180	CGI	FALSE	FALSE	TRUE
cg00025972	chr4	187762312	187762313	FAT1	2195	-114461	Non-CGI	FALSE	FALSE	TRUE
cg00349895	chr4	154073501	154073502	TRIM2	23321	-767	CGI	TRUE	FALSE	FALSE
cg00525145	chr4	1803443	1803444	FGFR3	2261	8403	CGI	FALSE	TRUE	FALSE
cg00699993	chr4	158141570	158141571	GRIA2	2891	274	CGI	TRUE	TRUE	FALSE
cg00714184	chr4	155664242	155664243	LRAT	9227	-908	CGI	TRUE	TRUE	FALSE
cg00740803	chr4	113143664	113143665	AP1AR	55435	-9229	CGI	FALSE	FALSE	TRUE
cg00859465	chr4	36246342	36246343	ARAP2	116984	-362	CGI	TRUE	TRUE	FALSE
cg00906130	chr4	175443797	175443798	HPGD	3248	245	CGI	TRUE	FALSE	FALSE
cg01275038	chr4	7287492	7287493	MIR4798	100616471	-24683	CGI-N-Shore	FALSE	TRUE	FALSE
cg01345586	chr4	2435944	2435945	LOC402160	402160	15242	CGI-S-Shelf	FALSE	TRUE	FALSE
cg01425021	chr4	1995036	1995037	MIR943	100126332	-6831	CGI-S-Shore	TRUE	TRUE	FALSE
cg01552919	chr4	901847	901848	GAK	2580	24325	CGI	FALSE	TRUE	FALSE
cg01572696	chr4	995849	995850	SLC26A1	10861	-8624	CGI	FALSE	TRUE	FALSE
cg01573825	chr4	169931453	169931454	CBR4	84869	13	CGI	TRUE	FALSE	FALSE
cg01648609	chr4	2049057	2049058	C4orf48	401115	5336	CGI	FALSE	FALSE	TRUE
cg01682615	chr4	2845235	2845236	ADD1	118	-347	CGI	TRUE	FALSE	FALSE
cg01694488	chr4	1580172	1580173	FAM53A	152877	105814	CGI	FALSE	FALSE	TRUE
cg01777861	chr4	56023843	56023844	KDR	3791	-32080	CGI	FALSE	FALSE	TRUE
cg01795199	chr4	1808807	1808808	FGFR3	2261	13767	CGI	FALSE	TRUE	FALSE
cg01943657	chr4	102268799	102268800	FLJ20021	90024	-133	CGI	TRUE	FALSE	FALSE
cg01966532	chr4	3704824	3704825	LOC100133461	100133461	-25241	Non-CGI	FALSE	FALSE	TRUE
cg02090418	chr4	113333269	113333270	NEUROG2	63973	104057	CGI	FALSE	TRUE	FALSE
cg02108033	chr4	17783294	17783295	FAM184B	27146	-158	CGI	TRUE	FALSE	FALSE
cg02348751	chr4	183064035	183064036	TENM3	55714	-1103	CGI	TRUE	TRUE	FALSE
cg02524099	chr4	1037816	1037817	FGFRL1	53834	32875	CGI	FALSE	FALSE	TRUE
cg02617981	chr4	3449663	3449664	HGFAC	3083	5936	CGI	FALSE	TRUE	FALSE
cg02650266	chr4	147558239	147558240	POU4F2	5458	-1804	CGI	TRUE	FALSE	FALSE
cg02759110	chr4	141489859	141489860	UCP1	7350	98	CGI	TRUE	FALSE	FALSE
cg02968883	chr4	160277142	160277143	RAPGEF2	9693	88143	Non-CGI	FALSE	TRUE	FALSE
cg03081615	chr4	8007156	8007157	AFAP1	60312	-65502	CGI	FALSE	TRUE	FALSE
cg03112087	chr4	142053720	142053721	RNF150	57484	894	CGI	TRUE	FALSE	FALSE
cg03184290	chr4	111550666	111550667	PITX2	5308	12611	CGI	FALSE	TRUE	FALSE
cg03248158	chr4	122632918	122632919	ANXA5	308	-14770	Non-CGI	FALSE	FALSE	TRUE
cg03292388	chr4	8594514	8594515	CPZ	8532	12296	CGI	TRUE	TRUE	FALSE
cg03313172	chr4	47033197	47033198	GABRB1	2560	-96	CGI-N-Shore	TRUE	FALSE	FALSE
cg03466779	chr4	7666141	7666142	AFAP1-AS1	84740	-89674	CGI	FALSE	TRUE	FALSE
cg03730969	chr4	99916055	99916056	METAP1	23173	-731	CGI-S-Shore	TRUE	FALSE	FALSE
cg03736795	chr4	174444307	174444308	HAND2	9464	7069	CGI	FALSE	FALSE	TRUE
cg03905413	chr4	41883172	41883173	TMEM33	55161	-53963	CGI	FALSE	TRUE	FALSE
cg04026169	chr4	85422265	85422266	NKX6-1	4825	-2877	CGI-S-Shore	FALSE	FALSE	TRUE
cg04184019	chr4	85424288	85424289	NKX6-1	4825	-4900	CGI	FALSE	FALSE	TRUE
cg04190870	chr4	115519516	115519517	UGT8	7368	-93	CGI	TRUE	FALSE	FALSE
cg04256347	chr4	141677674	141677675	TBC1D9	23158	-202	CGI	TRUE	FALSE	FALSE
cg04422289	chr4	48833305	48833306	OCIAD1	54940	244	CGI	TRUE	TRUE	FALSE
cg04643145	chr4	94753403	94753404	ATOH1	474	3324	CGI	FALSE	FALSE	TRUE
cg04643822	chr4	82965250	82965251	HNRNPD	3184	329897	CGI	FALSE	FALSE	TRUE
cg04742135	chr4	1800154	1800155	FGFR3	2261	5114	CGI-N-Shore	FALSE	TRUE	FALSE
cg04789602	chr4	1535659	1535660	CRIPAK	285464	150318	CGI	FALSE	FALSE	TRUE
cg04997045	chr4	1240068	1240069	CTBP1	1487	2838	CGI	FALSE	TRUE	FALSE
cg05006473	chr4	1504481	1504482	CRIPAK	285464	119140	CGI	FALSE	FALSE	TRUE
cg05100113	chr4	39460672	39460673	LIAS	11019	6	CGI	TRUE	FALSE	FALSE
cg05144635	chr4	7218707	7218708	SORCS2	57537	24332	CGI-S-Shore	FALSE	TRUE	FALSE
cg05376754	chr4	3825845	3825846	ADRA2C	152	57548	CGI	FALSE	FALSE	TRUE
cg05581451	chr4	111553999	111554000	PITX2	5308	9278	CGI	FALSE	TRUE	FALSE
cg05600350	chr4	4858598	4858599	MSX1	4487	-2792	CGI	FALSE	FALSE	TRUE
cg05733497	chr4	7968351	7968352	AFAP1	60312	-26697	CGI	FALSE	TRUE	FALSE
cg05787653	chr4	3597859	3597860	FLJ35424	285492	19262	CGI	FALSE	FALSE	TRUE
cg05807991	chr4	118006808	118006809	TRAM1L1	133022	-71	CGI	TRUE	FALSE	FALSE
cg05842457	chr4	7044863	7044864	CCDC96	257236	-134	CGI	TRUE	TRUE	FALSE
cg05867387	chr4	170679069	170679070	C4orf27	54969	22	CGI	TRUE	FALSE	FALSE
cg05874882	chr4	1763078	1763079	FGFR3	2261	-31959	CGI	FALSE	FALSE	TRUE
cg05887630	chr4	8256315	8256316	HTRA3	94031	-15172	CGI	FALSE	FALSE	TRUE
cg06252028	chr4	3726255	3726256	ADRA2C	152	-42039	CGI	FALSE	FALSE	TRUE
cg06340552	chr4	142054329	142054330	RNF150	57484	285	CGI	TRUE	FALSE	FALSE
cg06374962	chr4	111531926	111531927	PITX2	5308	31351	CGI	FALSE	FALSE	TRUE
cg06485940	chr4	40859293	40859294	NSUN7	79730	107378	CGI-S-Shore	TRUE	TRUE	FALSE
cg06544643	chr4	140036662	140036663	ELF2	1998	23987	CGI-S-Shore	FALSE	TRUE	FALSE
cg06634862	chr4	54457645	54457646	LNX1	84708	61035	Non-CGI	TRUE	TRUE	FALSE
cg06672737	chr4	778827	778828	LOC100129917	100129917	-3190	CGI	FALSE	TRUE	FALSE
cg06775055	chr4	18023265	18023266	LCORL	254251	216	CGI	TRUE	FALSE	FALSE
cg06796944	chr4	185570679	185570680	CASP3	836	-49	CGI	TRUE	FALSE	FALSE
cg06812693	chr4	26323246	26323247	RBPJ	3516	1913	CGI	FALSE	TRUE	FALSE
cg06821199	chr4	779230	779231	LOC100129917	100129917	-3593	CGI	FALSE	TRUE	FALSE
cg07108441	chr4	186508724	186508725	PDLIM3	27295	-52011	CGI	FALSE	TRUE	FALSE
cg07276861	chr4	76862355	76862356	NAAA	27163	-188	CGI	TRUE	FALSE	FALSE
cg07456114	chr4	185940036	185940037	HELT	391723	40	CGI	TRUE	FALSE	FALSE
cg07467562	chr4	135248622	135248623	PABPC4L	132430	-125718	CGI	TRUE	FALSE	FALSE
cg07536144	chr4	26030582	26030583	C4orf52	389203	114767	CGI	FALSE	FALSE	TRUE
cg07681935	chr4	174452461	174452462	NBLA00301	79804	851	CGI	TRUE	TRUE	FALSE
cg07837556	chr4	118006750	118006751	TRAM1L1	133022	-13	CGI	TRUE	FALSE	FALSE
cg07917127	chr4	99064746	99064747	STPG2	285555	-354	CGI	TRUE	FALSE	FALSE
cg07951488	chr4	41992560	41992561	SLC30A9	10463	36	CGI	TRUE	FALSE	FALSE
cg08288806	chr4	3076271	3076272	HTT-AS1	100750326	-29	CGI	TRUE	FALSE	FALSE
cg08468299	chr4	1276510	1276511	MAEA	10296	-7160	CGI	FALSE	TRUE	FALSE
cg08512702	chr4	13548915	13548916	LOC285548	285548	531	CGI	TRUE	FALSE	FALSE
cg08604785	chr4	899970	899971	GAK	2580	26202	CGI	FALSE	TRUE	FALSE
cg08712866	chr4	157997526	157997527	GLRB	2743	248	CGI	TRUE	TRUE	FALSE
cg08775137	chr4	41880319	41880320	TMEM33	55161	-56816	CGI	FALSE	FALSE	TRUE
cg08812889	chr4	174439925	174439926	HAND2	9464	11451	CGI	FALSE	FALSE	TRUE
cg08825286	chr4	10089919	10089920	MIR3138	100423011	-9602	CGI	FALSE	TRUE	FALSE
cg09082903	chr4	164253207	164253208	NPY1R	4886	738	CGI	FALSE	TRUE	FALSE
cg09111223	chr4	93225086	93225087	GRID2	2895	-462	CGI	TRUE	FALSE	FALSE
cg09112514	chr4	55096230	55096231	GSX2	170825	129981	CGI	FALSE	TRUE	FALSE
cg09150065	chr4	42158732	42158733	BEND4	389206	-3836	CGI-S-Shelf	FALSE	FALSE	TRUE
cg09157302	chr4	25656830	25656831	SLC34A2	10568	-603	CGI-N-Shore	TRUE	FALSE	FALSE
cg09333785	chr4	8202491	8202492	SH3TC1	54436	1430	CGI	FALSE	TRUE	FALSE
cg09344644	chr4	2757922	2757923	TNIP2	79155	179	CGI	TRUE	FALSE	FALSE
cg09412808	chr4	57180590	57180591	AASDH	132949	73046	CGI	FALSE	TRUE	FALSE
cg09532284	chr4	16084247	16084248	PROM1	8842	1374	CGI	FALSE	TRUE	FALSE
cg09772954	chr4	172734514	172734515	GALNTL6	442117	-59	CGI	TRUE	FALSE	FALSE
cg09795809	chr4	183062729	183062730	TENM3	55714	-2409	CGI	FALSE	TRUE	FALSE
cg09867290	chr4	174431730	174431731	HAND2	9464	19646	CGI-S-Shore	FALSE	FALSE	TRUE
cg09948192	chr4	7069943	7069944	GRPEL1	80273	-142	CGI	TRUE	FALSE	FALSE
cg09978860	chr4	56023921	56023922	KDR	3791	-32158	CGI	FALSE	FALSE	TRUE
cg10058464	chr4	81257211	81257212	C4orf22	255119	336	CGI	FALSE	TRUE	FALSE
cg10160807	chr4	3677497	3677498	LOC100133461	100133461	2083	Non-CGI	FALSE	TRUE	FALSE
cg10192893	chr4	41747895	41747896	PHOX2B	8929	3090	CGI	FALSE	TRUE	FALSE
cg10277927	chr4	118006825	118006826	TRAM1L1	133022	-88	CGI	TRUE	FALSE	FALSE
cg10503298	chr4	1217221	1217222	LOC100130872	100130872	-14470	CGI-S-Shore	FALSE	TRUE	FALSE
cg10521403	chr4	1763211	1763212	FGFR3	2261	-31826	CGI	FALSE	FALSE	TRUE
cg10620993	chr4	68265891	68265892	CENPC1	1060	145363	Non-CGI	FALSE	FALSE	TRUE
cg10652057	chr4	8651068	8651069	CPZ	8532	68850	CGI	FALSE	FALSE	TRUE
cg10683341	chr4	39639289	39639290	SMIM14	201895	1190	CGI	TRUE	TRUE	FALSE
cg10713951	chr4	7044983	7044984	TADA2B	93624	-171	CGI	TRUE	TRUE	FALSE
cg10740902	chr4	55991683	55991684	KDR	3791	77	CGI	TRUE	FALSE	FALSE
cg10825234	chr4	1041061	1041062	FGFRL1	53834	36120	CGI	FALSE	FALSE	TRUE
cg10981736	chr4	1242757	1242758	CTBP1	1487	149	CGI	TRUE	FALSE	FALSE
cg11026330	chr4	18023101	18023102	LCORL	254251	380	CGI	FALSE	TRUE	FALSE
cg11187796	chr4	3767169	3767170	ADRA2C	152	-1125	CGI	TRUE	FALSE	FALSE
cg11372436	chr4	24797007	24797008	SOD3	6649	-76	Non-CGI	TRUE	FALSE	FALSE
cg11697812	chr4	39699390	39699391	UBE2K	3093	-272	CGI-N-Shore	TRUE	FALSE	FALSE
cg11723848	chr4	96470286	96470287	UNC5C	8633	73	CGI	TRUE	FALSE	FALSE
cg11864499	chr4	2936740	2936741	NOP14-AS1	317648	113	CGI	TRUE	FALSE	FALSE
cg11969330	chr4	187125413	187125414	CYP4V2	285440	12738	CGI	TRUE	TRUE	FALSE
cg12221318	chr4	8648164	8648165	CPZ	8532	65946	CGI	FALSE	FALSE	TRUE
cg12573119	chr4	78977690	78977691	FRAS1	80144	-1032	CGI	TRUE	FALSE	FALSE
cg12726927	chr4	7941431	7941432	AFAP1	60312	220	CGI	TRUE	FALSE	FALSE
cg13053505	chr4	4854459	4854460	MSX1	4487	-6931	CGI-N-Shore	FALSE	FALSE	TRUE
cg13074295	chr4	3749413	3749414	ADRA2C	152	-18881	CGI	FALSE	FALSE	TRUE
cg13139972	chr4	107957430	107957431	DKK2	27123	247414	CGI	TRUE	TRUE	FALSE
cg13184723	chr4	16228062	16228063	TAPT1	202018	97	CGI	TRUE	FALSE	FALSE
cg13184823	chr4	187476599	187476600	MTNR1A	4543	-61	CGI	TRUE	FALSE	FALSE
cg13192013	chr4	160188736	160188737	RAPGEF2	9693	-260	Non-CGI	TRUE	FALSE	FALSE
cg13243661	chr4	189717968	189717969	LOC401164	401164	396077	CGI	FALSE	FALSE	TRUE
cg13298070	chr4	189580507	189580508	LOC401164	401164	258616	CGI	FALSE	FALSE	TRUE
cg13321967	chr4	53617679	53617680	ERVMER34-1	100288413	126	CGI	TRUE	FALSE	FALSE
cg13732058	chr4	28829667	28829668	MIR4275	100422937	8462	CGI	FALSE	FALSE	TRUE
cg13778078	chr4	785160	785161	LOC100129917	100129917	-9523	CGI	FALSE	TRUE	FALSE
cg13938963	chr4	68411314	68411315	CENPC1	1060	-57	CGI	TRUE	FALSE	FALSE
cg13978156	chr4	183168121	183168122	MIR1305	100302270	77674	CGI	FALSE	TRUE	FALSE
cg14266050	chr4	2845671	2845672	ADD1	118	86	CGI	TRUE	FALSE	FALSE
cg14339068	chr4	6311034	6311035	WFS1	7466	39456	CGI	FALSE	FALSE	TRUE
cg14451728	chr4	57092248	57092249	KIAA1211	57482	55886	Non-CGI	FALSE	TRUE	FALSE
cg14466863	chr4	1188421	1188422	LOC100130872	100130872	14327	CGI	FALSE	TRUE	FALSE
cg14527262	chr4	1202653	1202654	LOC100130872	100130872	95	CGI	TRUE	FALSE	FALSE
cg14529598	chr4	8098851	8098852	ABLIM2	84448	61706	CGI-S-Shore	FALSE	TRUE	FALSE
cg14557232	chr4	1368966	1368967	CRIPAK	285464	-16372	CGI	FALSE	TRUE	FALSE
cg14815724	chr4	48271893	48271894	TEC	7006	-78	CGI	TRUE	FALSE	FALSE
cg14832317	chr4	13526597	13526598	LOC285547	285547	6442	CGI	FALSE	FALSE	TRUE
cg15132749	chr4	3785927	3785928	ADRA2C	152	17630	CGI-S-Shore	FALSE	FALSE	TRUE
cg15205559	chr4	188736172	188736173	ZFP42	132625	-180751	CGI	FALSE	FALSE	TRUE
cg15441006	chr4	139110589	139110590	SLC7A11	23657	52912	Non-CGI	FALSE	TRUE	FALSE
cg15543566	chr4	87515467	87515468	PTPN13	5783	0	CGI	TRUE	FALSE	FALSE
cg15565319	chr4	40057545	40057546	N4BP2	55728	-977	CGI	TRUE	TRUE	FALSE
cg15724272	chr4	89513644	89513645	HERC3	8916	-1	CGI	TRUE	FALSE	FALSE
cg15854548	chr4	4643278	4643279	LOC100507266	100507266	99419	Non-CGI	FALSE	TRUE	FALSE
cg15945785	chr4	170304303	170304304	SH3RF1	57630	-112053	Non-CGI	FALSE	FALSE	TRUE
cg16026922	chr4	41259044	41259045	UCHL1	7345	145	CGI	FALSE	TRUE	FALSE
cg16150307	chr4	157119998	157119999	CTSO	1519	-244949	CGI	FALSE	FALSE	TRUE
cg16162668	chr4	122873147	122873148	TRPC3	7222	-237	CGI	TRUE	FALSE	FALSE
cg16292168	chr4	13549494	13549495	LOC285548	285548	-45	CGI	TRUE	FALSE	FALSE
cg16296880	chr4	39367793	39367794	RFC1	5981	206	CGI	FALSE	TRUE	FALSE
cg16324579	chr4	83934054	83934055	LIN54	132660	-13	CGI	TRUE	FALSE	FALSE
cg16461251	chr4	104640833	104640834	TACR3	6870	138	CGI	TRUE	FALSE	FALSE
cg16528272	chr4	3502518	3502519	LRPAP1	4043	31704	CGI	FALSE	TRUE	FALSE
cg16700392	chr4	156680207	156680208	GUCY1B3	2983	80	CGI	TRUE	FALSE	FALSE
cg16786756	chr4	187422114	187422115	LOC285441	285441	96	CGI	TRUE	FALSE	FALSE
cg16851482	chr4	6955953	6955954	TBC1D14	57533	44781	CGI	FALSE	TRUE	FALSE
cg16885470	chr4	1643073	1643074	FAM53A	152877	42913	CGI-S-Shore	FALSE	TRUE	FALSE
cg16942223	chr4	6050460	6050461	MIR378D1	100616201	-125404	CGI-N-Shelf	FALSE	TRUE	FALSE
cg16957523	chr4	11431359	11431360	HS3ST1	9957	-821	CGI	TRUE	FALSE	FALSE
cg17160751	chr4	104641250	104641251	TACR3	6870	-276	CGI	TRUE	FALSE	FALSE
cg17187287	chr4	115519593	115519594	UGT8	7368	-16	CGI	TRUE	FALSE	FALSE
cg17214381	chr4	188916668	188916669	ZFP42	132625	-255	CGI	TRUE	FALSE	FALSE
cg17275700	chr4	91049007	91049008	CCSER1	401145	322	CGI	FALSE	TRUE	FALSE
cg17362483	chr4	177420127	177420128	SPCS3	60559	179036	Non-CGI	FALSE	FALSE	TRUE
cg17436946	chr4	39699568	39699569	UBE2K	3093	-94	CGI	TRUE	FALSE	FALSE
cg17473165	chr4	105411756	105411757	CXXC4	80319	4300	CGI-N-Shore	TRUE	TRUE	FALSE
cg17574471	chr4	1834678	1834679	LETM1	3954	23294	CGI	FALSE	TRUE	FALSE
cg17627921	chr4	7301823	7301824	MIR4798	100616471	-10352	CGI-S-Shore	FALSE	TRUE	FALSE
cg17631454	chr4	49308567	49308568	CWH43	80157	320301	CGI-N-Shore	FALSE	FALSE	TRUE
cg17672050	chr4	53579353	53579354	SNORA26	677810	-61	CGI-S-Shore	TRUE	TRUE	FALSE
cg17717282	chr4	81307915	81307916	C4orf22	255119	51040	CGI	FALSE	TRUE	FALSE
cg17868445	chr4	83294709	83294710	HNRNPD	3184	438	CGI	TRUE	FALSE	FALSE
cg17896776	chr4	172733760	172733761	GALNTL6	442117	-813	CGI-N-Shore	TRUE	FALSE	FALSE
cg17898823	chr4	25032472	25032473	LGI2	55203	-57	CGI	TRUE	FALSE	FALSE
cg18021716	chr4	75230944	75230945	EREG	2069	83	CGI	TRUE	FALSE	FALSE
cg18123043	chr4	1022462	1022463	FGFRL1	53834	17521	CGI-N-Shore	FALSE	FALSE	TRUE
cg18123319	chr4	73433788	73433789	ADAMTS3	9508	726	CGI-N-Shore	FALSE	TRUE	FALSE
cg18132212	chr4	40751843	40751844	NSUN7	79730	-69	CGI	TRUE	FALSE	FALSE
cg18314424	chr4	184718605	184718606	STOX2	56977	-107902	CGI	FALSE	FALSE	TRUE
cg18347642	chr4	21950766	21950767	KCNIP4	80333	-391	CGI	TRUE	FALSE	FALSE
cg18352616	chr4	3374830	3374831	HGFAC	3083	-68894	CGI	FALSE	TRUE	FALSE
cg18515868	chr4	1304836	1304837	MAEA	10296	21163	CGI	FALSE	TRUE	FALSE
cg18804985	chr4	74965226	74965227	CXCL2	2920	-228	CGI	TRUE	FALSE	FALSE
cg19170015	chr4	74734714	74734715	CXCL1	2919	-393	CGI-N-Shore	TRUE	FALSE	FALSE
cg19326382	chr4	185913864	185913865	HELT	391723	-26129	CGI	FALSE	FALSE	TRUE
cg19563433	chr4	6957112	6957113	TBC1D14	57533	45940	CGI-S-Shore	FALSE	TRUE	FALSE
cg19660515	chr4	74285329	74285330	AFP	174	-11524	Non-CGI	FALSE	TRUE	FALSE
cg19739468	chr4	1986914	1986915	MIR943	100126332	1288	CGI	FALSE	TRUE	FALSE
cg19759671	chr4	183063459	183063460	TENM3	55714	-1679	CGI	TRUE	TRUE	FALSE
cg19780352	chr4	169798931	169798932	CBR4	84869	132535	CGI	TRUE	TRUE	FALSE
cg19908812	chr4	164253006	164253007	NPY1R	4886	939	CGI	FALSE	TRUE	FALSE
cg20332645	chr4	1400869	1400870	CRIPAK	285464	15528	CGI	FALSE	FALSE	TRUE
cg20591353	chr4	4171354	4171355	OTOP1	133060	57265	CGI	FALSE	FALSE	TRUE
cg20608348	chr4	1204225	1204226	LOC100130872	100130872	-1474	CGI-S-Shore	TRUE	FALSE	FALSE
cg20710842	chr4	140201262	140201263	MGARP	84709	228	CGI	TRUE	FALSE	FALSE
cg20740157	chr4	83720629	83720630	SCD5	79966	-618	CGI-S-Shore	TRUE	FALSE	FALSE
cg20964594	chr4	8594324	8594325	CPZ	8532	12106	CGI-N-Shore	TRUE	TRUE	FALSE
cg21013745	chr4	7512425	7512426	MIR4274	100422826	50669	CGI	FALSE	TRUE	FALSE
cg21108841	chr4	24914750	24914751	CCDC149	91050	67074	CGI	TRUE	TRUE	FALSE
cg21150843	chr4	153641409	153641410	TMEM154	201799	-40091	Non-CGI	FALSE	FALSE	TRUE
cg21599230	chr4	118006619	118006620	TRAM1L1	133022	115	CGI	TRUE	FALSE	FALSE
cg21722242	chr4	2464050	2464051	RNF4	6047	-6743	CGI	FALSE	TRUE	FALSE
cg21782409	chr4	96470887	96470888	UNC5C	8633	-525	CGI	TRUE	FALSE	FALSE
cg21942184	chr4	719614	719615	PCGF3	10336	20040	CGI	FALSE	TRUE	FALSE
cg21954109	chr4	6675619	6675620	LOC93622	93622	-200	CGI	TRUE	FALSE	FALSE
cg22127491	chr4	140217063	140217064	NAA15	80155	-5611	CGI	TRUE	TRUE	FALSE
cg22140614	chr4	887730	887731	GAK	2580	38442	CGI	FALSE	TRUE	FALSE
cg22270027	chr4	81128234	81128235	PRDM8	56978	22794	CGI	FALSE	FALSE	TRUE
cg22631127	chr4	174291105	174291106	SAP30	8819	-986	CGI	TRUE	FALSE	FALSE
cg22718636	chr4	961658	961659	DGKQ	1609	5684	CGI	FALSE	TRUE	FALSE
cg22736383	chr4	8024970	8024971	AFAP1	60312	-83316	CGI	FALSE	TRUE	FALSE
cg23300732	chr4	5053496	5053497	STK32B	55351	-29	CGI	TRUE	FALSE	FALSE
cg23365637	chr4	8271792	8271793	HTRA3	94031	302	CGI	TRUE	FALSE	FALSE
cg23447233	chr4	1295047	1295048	MAEA	10296	11374	CGI	FALSE	TRUE	FALSE
cg23494874	chr4	83812516	83812517	THAP9	79725	-9319	CGI	TRUE	TRUE	FALSE
cg23605991	chr4	618114	618115	PDE6B	5158	-1247	CGI-N-Shore	TRUE	FALSE	FALSE
cg23649435	chr4	184826421	184826422	STOX2	56977	-86	CGI	TRUE	FALSE	FALSE
cg23663824	chr4	187112650	187112651	CYP4V2	285440	-22	CGI	TRUE	FALSE	FALSE
cg23680026	chr4	119200183	119200184	SNORA24	677809	-160	CGI	TRUE	TRUE	FALSE
cg23690302	chr4	190276895	190276896	HSP90AA4P	3323	-117402	CGI	FALSE	FALSE	TRUE
cg23713724	chr4	21306051	21306052	KCNIP4-IT1	359822	548758	CGI	TRUE	TRUE	FALSE
cg23806894	chr4	111535528	111535529	PITX2	5308	27749	CGI	FALSE	FALSE	TRUE
cg23893620	chr4	20884385	20884386	PACRGL	133015	186479	Non-CGI	TRUE	TRUE	FALSE
cg23939001	chr4	940644	940645	TMEM175	84286	14381	CGI-S-Shore	FALSE	TRUE	FALSE
cg24023289	chr4	109087312	109087313	LEF1-AS1	641518	-1367	CGI	TRUE	TRUE	FALSE
cg24061702	chr4	100871534	100871535	H2AFZ	3015	-21	CGI	TRUE	FALSE	FALSE
cg24183909	chr4	118006747	118006748	TRAM1L1	133022	-10	CGI	TRUE	FALSE	FALSE
cg24269412	chr4	1340602	1340603	UVSSA	57654	-500	CGI	TRUE	FALSE	FALSE
cg24395452	chr4	52943197	52943198	SPATA18	132671	25603	CGI	FALSE	TRUE	FALSE
cg24529941	chr4	146100818	146100819	OTUD4	54726	12	CGI	TRUE	FALSE	FALSE
cg24531494	chr4	121993049	121993050	NDNF	79625	622	CGI	FALSE	TRUE	FALSE
cg24560729	chr4	1342394	1342395	UVSSA	57654	1289	CGI	FALSE	TRUE	FALSE
cg24686357	chr4	48272266	48272267	TEC	7006	-451	CGI	TRUE	FALSE	FALSE
cg24693053	chr4	682834	682835	MFSD7	84179	137	CGI	TRUE	FALSE	FALSE
cg24721899	chr4	13543985	13543986	NKX3-2	579	2127	CGI	FALSE	TRUE	FALSE
cg24796651	chr4	76912348	76912349	SDAD1	55153	-234	CGI-S-Shore	TRUE	FALSE	FALSE
cg24978835	chr4	76912244	76912245	SDAD1	55153	-130	CGI	TRUE	FALSE	FALSE
cg24980653	chr4	1399235	1399236	CRIPAK	285464	13894	CGI-S-Shore	FALSE	FALSE	TRUE
cg25007799	chr4	1579657	1579658	FAM53A	152877	106329	CGI	TRUE	FALSE	FALSE
cg25034424	chr4	1513089	1513090	CRIPAK	285464	127748	CGI-S-Shore	FALSE	FALSE	TRUE
cg25054754	chr4	169754328	169754329	CBR4	84869	177138	CGI	FALSE	TRUE	FALSE
cg25060172	chr4	76555980	76555981	CDKL2	8999	-258	CGI	TRUE	FALSE	FALSE
cg25107254	chr4	187476455	187476456	MTNR1A	4543	80	CGI	TRUE	FALSE	FALSE
cg25243082	chr4	40267141	40267142	RHOH	399	68613	Non-CGI	FALSE	FALSE	TRUE
cg25262044	chr4	107958491	107958492	DKK2	27123	246353	CGI	TRUE	TRUE	FALSE
cg25354926	chr4	812611	812612	CPLX1	10815	7332	CGI	FALSE	TRUE	FALSE
cg25377796	chr4	8643957	8643958	CPZ	8532	61739	CGI-S-Shore	FALSE	FALSE	TRUE
cg25444386	chr4	55990944	55990945	KDR	3791	816	CGI	FALSE	TRUE	FALSE
cg25449950	chr4	24797174	24797175	SOD3	6649	88	CGI-N-Shelf	TRUE	FALSE	FALSE
cg25512518	chr4	44728647	44728648	GNPDA2	132789	-34	CGI	TRUE	FALSE	FALSE
cg25615081	chr4	80329402	80329403	GK2	2712	-29	CGI	TRUE	FALSE	FALSE
cg25670583	chr4	715865	715866	PCGF3	10336	16291	CGI	FALSE	TRUE	FALSE
cg25970575	chr4	6010164	6010165	MIR378D1	100616201	-85108	CGI	FALSE	FALSE	TRUE
cg25978090	chr4	2011084	2011085	NELFA	7469	-121	CGI	TRUE	FALSE	FALSE
cg25987564	chr4	6010075	6010076	MIR378D1	100616201	-85019	CGI	FALSE	FALSE	TRUE
cg26039254	chr4	52917541	52917542	SPATA18	132671	-50	CGI	TRUE	FALSE	FALSE
cg26306909	chr4	37455485	37455486	C4orf19	55286	-65	CGI	TRUE	FALSE	FALSE
cg26330987	chr4	7027124	7027125	CCDC96	257236	17602	CGI	FALSE	TRUE	FALSE
cg26775961	chr4	71553999	71554000	UTP3	57050	-195	CGI	TRUE	FALSE	FALSE
cg26831119	chr4	111550830	111550831	PITX2	5308	12447	CGI	FALSE	TRUE	FALSE
cg26988159	chr4	152682272	152682273	PET112	5188	-96	CGI	TRUE	FALSE	FALSE
cg27191207	chr4	124320678	124320679	SPRY1	10252	2721	CGI-S-Shore	TRUE	TRUE	FALSE
cg27219598	chr4	148538521	148538522	TMEM184C	55751	-16	CGI	TRUE	FALSE	FALSE
cg27264049	chr4	13537872	13537873	LOC285547	285547	-4830	CGI	FALSE	FALSE	TRUE
cg27270116	chr4	184319589	184319590	CDKN2AIP	55602	-46198	CGI-N-Shore	FALSE	FALSE	TRUE
cg27453479	chr4	4292053	4292054	ZBTB49	166793	128	CGI	TRUE	FALSE	FALSE
cg27475132	chr4	187645120	187645121	FAT1	2195	2728	CGI	TRUE	TRUE	FALSE
cg00048832	chr5	161274631	161274632	GABRA1	2554	433	CGI	TRUE	TRUE	FALSE
cg00059399	chr5	2008272	2008273	IRX4	50805	-125391	CGI	FALSE	FALSE	TRUE
cg00096810	chr5	178753432	178753433	ADAMTS2	9509	18997	CGI	FALSE	TRUE	FALSE
cg00124993	chr5	135416412	135416413	VTRNA2-1	100126299	-125	CGI	TRUE	FALSE	FALSE
cg00223136	chr5	3609364	3609365	IRX1	79192	13195	CGI-S-Shelf	FALSE	FALSE	TRUE
cg00251610	chr5	158527817	158527818	EBF1	1879	-1028	CGI	TRUE	FALSE	FALSE
cg00332937	chr5	72740460	72740461	BTF3	689	-53788	CGI	FALSE	FALSE	TRUE
cg00530568	chr5	135587383	135587384	LOC389332	389332	-58531	CGI	FALSE	TRUE	FALSE
cg00574530	chr5	134872064	134872065	NEUROG1	4762	-424	CGI	TRUE	FALSE	FALSE
cg00642460	chr5	176827697	176827698	PFN3	345456	-59	CGI	TRUE	FALSE	FALSE
cg01019082	chr5	62073161	62073162	LRRC70	100130733	198598	Non-CGI	FALSE	FALSE	TRUE
cg01088410	chr5	170739179	170739180	TLX3	30012	2890	CGI-S-Shore	FALSE	FALSE	TRUE
cg01183017	chr5	76114822	76114823	F2RL1	2150	-9	CGI	TRUE	FALSE	FALSE
cg01207734	chr5	79950934	79950935	DHFR	1719	-133	CGI-S-Shore	TRUE	TRUE	FALSE
cg01232040	chr5	172024892	172024893	NEURL1B	54492	-43382	Non-CGI	FALSE	FALSE	TRUE
cg01256882	chr5	1271100	1271101	TERT	7015	24060	CGI	FALSE	TRUE	FALSE
cg01587896	chr5	50678925	50678926	ISL1	3670	-31	CGI	TRUE	FALSE	FALSE
cg01889143	chr5	134825791	134825792	TIFAB	497189	-37701	CGI	FALSE	FALSE	TRUE
cg01906733	chr5	6491443	6491444	UBE2QL1	134111	42706	CGI-N-Shore	FALSE	TRUE	FALSE
cg01916762	chr5	59996028	59996029	DEPDC1B	55789	-34	CGI	TRUE	FALSE	FALSE
cg01982455	chr5	149829250	149829251	RPS14	6208	67	CGI	TRUE	TRUE	FALSE
cg01995468	chr5	176544135	176544136	NSD1	64324	-15943	CGI	FALSE	FALSE	TRUE
cg02010196	chr5	146889275	146889276	DPYSL3	1809	342	CGI	TRUE	FALSE	FALSE
cg02034689	chr5	54518136	54518137	MCIN	345643	5005	CGI	FALSE	TRUE	FALSE
cg02037307	chr5	134363562	134363563	PITX1	5307	6400	CGI	FALSE	TRUE	FALSE
cg02081006	chr5	122430434	122430435	PRDM6	93166	5592	CGI	FALSE	TRUE	FALSE
cg02103891	chr5	171769408	171769409	UBTD2	92181	-58612	CGI-S-Shelf	FALSE	TRUE	FALSE
cg02164153	chr5	172068145	172068146	NEURL1B	54492	-129	CGI	TRUE	FALSE	FALSE
cg02328545	chr5	180030008	180030009	SCGB3A1	92304	-11520	CGI-S-Shore	FALSE	TRUE	FALSE
cg02345266	chr5	1008964	1008965	NKD2	85409	-202	CGI	TRUE	FALSE	FALSE
cg02452944	chr5	140810109	140810110	PCDHGA12	26025	-47	CGI-N-Shore	TRUE	TRUE	FALSE
cg02496256	chr5	31193844	31193845	CDH6	1004	81	CGI-N-Shore	TRUE	FALSE	FALSE
cg02549492	chr5	95066568	95066569	RHOBTB3	22836	13230	CGI-N-Shore	TRUE	TRUE	FALSE
cg02599293	chr5	137090023	137090024	HNRNPA0	10949	14	CGI	TRUE	TRUE	FALSE
cg02606808	chr5	71403502	71403503	MAP1B	4131	383	CGI	TRUE	FALSE	FALSE
cg02707176	chr5	140798758	140798759	PCDHGB7	56099	1543	CGI	TRUE	TRUE	FALSE
cg02762440	chr5	71014792	71014793	CARTPT	9607	-196	CGI-N-Shore	TRUE	FALSE	FALSE
cg03318614	chr5	140174612	140174613	PCDHA2	56146	167	CGI	TRUE	TRUE	FALSE
cg03537301	chr5	56246561	56246562	MIER3	166968	20939	CGI	FALSE	TRUE	FALSE
cg03540794	chr5	2112109	2112110	IRX4	50805	-229228	CGI	FALSE	FALSE	TRUE
cg03828328	chr5	140744556	140744557	PCDHGA5	56110	657	CGI	TRUE	TRUE	FALSE
cg03866757	chr5	172484412	172484413	CREBRF	153222	1056	CGI	TRUE	TRUE	FALSE
cg04058281	chr5	980580	980581	LOC100506688	100506688	16873	CGI-S-Shore	FALSE	FALSE	TRUE
cg04148483	chr5	43484102	43484103	C5orf28	64417	-109	CGI	TRUE	FALSE	FALSE
cg04213700	chr5	118309460	118309461	MIR1244-1	100302285	-819	CGI	TRUE	TRUE	FALSE
cg04293725	chr5	93447600	93447601	FAM172A	83989	-195	CGI	TRUE	FALSE	FALSE
cg04299200	chr5	534332	534333	MIR4456	100616381	1663	CGI	FALSE	FALSE	TRUE
cg04439218	chr5	37839407	37839408	GDNF	2668	373	CGI	TRUE	TRUE	FALSE
cg04518342	chr5	131593106	131593107	PDLIM4	8572	-243	CGI	TRUE	TRUE	FALSE
cg04541368	chr5	92909429	92909430	FLJ42709	441094	7572	CGI-S-Shore	FALSE	TRUE	FALSE
cg04562394	chr5	126073718	126073719	LMNB1	4001	-38595	Non-CGI	FALSE	FALSE	TRUE
cg04648847	chr5	74063095	74063096	NSA2	10412	-6	CGI	TRUE	FALSE	FALSE
cg04652536	chr5	99381840	99381841	LOC100133050	100133050	342116	CGI	TRUE	FALSE	FALSE
cg04672769	chr5	140070921	140070922	HARS	3035	48	CGI	TRUE	FALSE	FALSE
cg04693014	chr5	180645302	180645303	MIR4638	100616342	4329	CGI	TRUE	FALSE	FALSE
cg05021796	chr5	180632114	180632115	TRIM7	81786	61	CGI	TRUE	FALSE	FALSE
cg05176146	chr5	147763541	147763542	FBXO38	81545	-3	CGI	TRUE	FALSE	FALSE
cg05201970	chr5	45696206	45696207	HCN1	348980	12	CGI	TRUE	FALSE	FALSE
cg05224707	chr5	171881549	171881550	SH3PXD2B	285590	-21	CGI	TRUE	FALSE	FALSE
cg05262724	chr5	31908436	31908437	MIR4279	100422874	27827	CGI	FALSE	TRUE	FALSE
cg05477834	chr5	140536175	140536176	PCDHB17	54661	594	CGI	TRUE	FALSE	FALSE
cg05509352	chr5	142092851	142092852	FGF1	2246	-15215	CGI	FALSE	FALSE	TRUE
cg05593182	chr5	142092835	142092836	FGF1	2246	-15199	CGI	FALSE	FALSE	TRUE
cg05625559	chr5	6775922	6775923	MIR4278	100422999	52110	CGI-S-Shore	FALSE	FALSE	TRUE
cg05634287	chr5	148931071	148931072	CSNK1A1	1452	-63	CGI	TRUE	FALSE	FALSE
cg05656566	chr5	178593924	178593925	ZNF354C	30832	106316	CGI	FALSE	TRUE	FALSE
cg05686497	chr5	127874587	127874588	FBN2	2201	-670	CGI	TRUE	FALSE	FALSE
cg05852276	chr5	140579470	140579471	PCDHB11	56125	121	CGI-N-Shore	TRUE	FALSE	FALSE
cg05904966	chr5	7851031	7851032	C5orf49	134121	231	CGI	TRUE	FALSE	FALSE
cg06183338	chr5	178004204	178004205	COL23A1	91522	13350	CGI	FALSE	TRUE	FALSE
cg06536614	chr5	135416381	135416382	VTRNA2-1	100126299	-94	CGI	TRUE	FALSE	FALSE
cg06585708	chr5	3602413	3602414	IRX1	79192	6244	CGI	FALSE	FALSE	TRUE
cg06599677	chr5	178322856	178322857	ZFP2	80108	-58	CGI	TRUE	FALSE	FALSE
cg06651505	chr5	166802425	166802426	TENM2	57451	90581	CGI	FALSE	TRUE	FALSE
cg06742628	chr5	16886424	16886425	MYO10	4651	49959	Non-CGI	FALSE	TRUE	FALSE
cg06847624	chr5	176827671	176827672	PFN3	345456	-33	CGI	TRUE	FALSE	FALSE
cg06850283	chr5	44389769	44389770	FGF10	2255	-984	CGI	TRUE	FALSE	FALSE
cg06918474	chr5	126205081	126205082	LMNB1	4001	92765	CGI	FALSE	TRUE	FALSE
cg07019536	chr5	14872207	14872208	ANKH	56172	-319	CGI	TRUE	FALSE	FALSE
cg07039560	chr5	140683681	140683682	SLC25A2	83884	-68	CGI	TRUE	FALSE	FALSE
cg07143328	chr5	177366442	177366443	PROP1	5626	56799	CGI	FALSE	FALSE	TRUE
cg07233159	chr5	121414322	121414323	LOX	4015	-266	CGI-S-Shore	TRUE	FALSE	FALSE
cg07252851	chr5	74063056	74063057	GFM2	84340	-13	CGI	TRUE	FALSE	FALSE
cg07266144	chr5	131607372	131607373	PDLIM4	8572	14020	CGI	FALSE	TRUE	FALSE
cg07270078	chr5	50678712	50678713	ISL1	3670	-244	CGI	TRUE	FALSE	FALSE
cg07315372	chr5	43557521	43557522	PAIP1	10605	0	CGI	TRUE	FALSE	FALSE
cg07363961	chr5	539880	539881	MIR4456	100616381	-3882	CGI-S-Shore	FALSE	FALSE	TRUE
cg07413150	chr5	176918920	176918921	PDLIM7	9260	5680	CGI	TRUE	TRUE	FALSE
cg07442479	chr5	37839769	37839770	GDNF	2668	11	CGI	TRUE	FALSE	FALSE
cg07565505	chr5	1887300	1887301	IRX4	50805	-4419	CGI	FALSE	FALSE	TRUE
cg07666882	chr5	102898223	102898224	NUDT12	83594	265	CGI	FALSE	TRUE	FALSE
cg07697189	chr5	171766855	171766856	UBTD2	92181	-56059	CGI-S-Shore	FALSE	TRUE	FALSE
cg07760269	chr5	760077	760078	TPPP	11076	-66566	CGI-S-Shore	FALSE	FALSE	TRUE
cg07781035	chr5	134871778	134871779	NEUROG1	4762	-138	CGI	TRUE	FALSE	FALSE
cg07834743	chr5	5139610	5139611	ADAMTS16	170690	-831	CGI	TRUE	FALSE	FALSE
cg08235864	chr5	2751822	2751823	IRX2	153572	-52	CGI-S-Shore	TRUE	FALSE	FALSE
cg08239858	chr5	2739131	2739132	IRX2	153572	12636	CGI	FALSE	FALSE	TRUE
cg08371532	chr5	172982357	172982358	LOC285593	285593	-24287	CGI-N-Shore	FALSE	FALSE	TRUE
cg08472341	chr5	17670475	17670476	LOC401177	401177	-283055	Non-CGI	FALSE	FALSE	TRUE
cg08480826	chr5	87981253	87981254	LINC00461	645323	-632	CGI	TRUE	FALSE	FALSE
cg08537847	chr5	148810203	148810204	MIR143	406935	1721	Non-CGI	TRUE	TRUE	FALSE
cg08560074	chr5	169532686	169532687	FOXI1	2299	-229	CGI-N-Shore	TRUE	FALSE	FALSE
cg08609445	chr5	1729137	1729138	MIR4277	100422966	-20153	CGI	FALSE	FALSE	TRUE
cg08621406	chr5	35618280	35618281	SPEF2	79925	290	CGI	FALSE	TRUE	FALSE
cg08767686	chr5	51426	51427	PLEKHG4B	153478	-88945	CGI-S-Shore	FALSE	FALSE	TRUE
cg08957484	chr5	132083532	132083533	CCNI2	645121	394	CGI	TRUE	FALSE	FALSE
cg08979191	chr5	132113734	132113735	2008-09-01	23176	-172	CGI-S-Shore	TRUE	FALSE	FALSE
cg09088988	chr5	146614298	146614299	STK32A	202374	-279	CGI	TRUE	FALSE	FALSE
cg09528265	chr5	146258195	146258196	PPP2R2B	5521	202857	CGI	TRUE	TRUE	FALSE
cg09542997	chr5	179621502	179621503	RASGEF1C	255426	14626	CGI	FALSE	TRUE	FALSE
cg09639151	chr5	140810920	140810921	PCDHGA12	26025	761	CGI	TRUE	TRUE	FALSE
cg09648333	chr5	145826742	145826743	TCERG1	10915	-129	CGI	TRUE	FALSE	FALSE
cg09693432	chr5	7851280	7851281	C5orf49	134121	-15	CGI	TRUE	FALSE	FALSE
cg09792008	chr5	44389062	44389063	FGF10	2255	-277	CGI	TRUE	FALSE	FALSE
cg09800974	chr5	178688272	178688273	ADAMTS2	9509	84157	CGI-S-Shore	FALSE	TRUE	FALSE
cg09847476	chr5	141293803	141293804	KIAA0141	9812	-9580	CGI	FALSE	FALSE	TRUE
cg10453230	chr5	174148198	174148199	MSX2	4488	-3375	CGI	FALSE	FALSE	TRUE
cg10513943	chr5	83042603	83042604	HAPLN1	1404	-25706	CGI	FALSE	FALSE	TRUE
cg10528482	chr5	525771	525772	SLC9A3	6550	-1221	CGI-S-Shore	TRUE	FALSE	FALSE
cg10530883	chr5	3596207	3596208	IRX1	79192	38	CGI	TRUE	FALSE	FALSE
cg10933186	chr5	140719302	140719303	PCDHGA2	56113	947	CGI	TRUE	TRUE	FALSE
cg11093640	chr5	176308026	176308027	HK3	3101	18305	CGI	FALSE	TRUE	FALSE
cg11096629	chr5	132148948	132148949	SOWAHA	134548	-83	CGI	TRUE	FALSE	FALSE
cg11105358	chr5	176758052	176758053	MXD3	83463	-18759	CGI	FALSE	FALSE	TRUE
cg11123744	chr5	1201479	1201480	SLC6A19	340024	-229	CGI	TRUE	FALSE	FALSE
cg11143131	chr5	131608246	131608247	PDLIM4	8572	14894	CGI	FALSE	TRUE	FALSE
cg11206381	chr5	158737792	158737793	IL12B	3593	19687	CGI	FALSE	FALSE	TRUE
cg11248182	chr5	138774785	138774786	DNAJC18	202052	427	CGI	FALSE	TRUE	FALSE
cg11284842	chr5	92931817	92931818	NR2F1	7025	12773	CGI	FALSE	FALSE	TRUE
cg11339965	chr5	93954434	93954435	ANKRD32	84250	42	CGI	TRUE	FALSE	FALSE
cg11354603	chr5	4230769	4230770	IRX1	79192	634600	CGI	FALSE	FALSE	TRUE
cg11410813	chr5	41925120	41925121	FBXO4	26272	-234	CGI	TRUE	FALSE	FALSE
cg11606461	chr5	112629604	112629605	TSSK1B	83942	141122	CGI	FALSE	TRUE	FALSE
cg11608150	chr5	135415948	135415949	VTRNA2-1	100126299	336	CGI	FALSE	FALSE	TRUE
cg11631871	chr5	171710573	171710574	UBTD2	92181	220	CGI	FALSE	TRUE	FALSE
cg11686819	chr5	2137080	2137081	IRX4	50805	-254199	CGI	FALSE	FALSE	TRUE
cg11711420	chr5	50679290	50679291	ISL1	3670	331	CGI	TRUE	FALSE	FALSE
cg11793978	chr5	135188477	135188478	SLC25A48	153328	18111	CGI	FALSE	TRUE	FALSE
cg11830096	chr5	140865433	140865434	PCDHGC4	56098	691	CGI	TRUE	TRUE	FALSE
cg11843238	chr5	131593191	131593192	PDLIM4	8572	-158	CGI	TRUE	TRUE	FALSE
cg11954680	chr5	140254793	140254794	PCDHA12	56137	-136	CGI-N-Shore	TRUE	TRUE	FALSE
cg12168164	chr5	33441063	33441064	TARS	6897	164	CGI	TRUE	FALSE	FALSE
cg12180613	chr5	132158560	132158561	SHROOM1	134549	8028	CGI-N-Shore	FALSE	TRUE	FALSE
cg12325536	chr5	87968658	87968659	MIR9-2	407047	-5900	CGI	FALSE	TRUE	FALSE
cg12355862	chr5	148205911	148205912	ADRB2	154	-243	CGI	TRUE	TRUE	FALSE
cg12363903	chr5	134526269	134526270	LOC340073	340073	57596	CGI	FALSE	TRUE	FALSE
cg12368524	chr5	158758705	158758706	LOC285626	285626	178	CGI	TRUE	FALSE	FALSE
cg12402800	chr5	56204917	56204918	SETD9	133383	-168	CGI-N-Shore	TRUE	FALSE	FALSE
cg12453014	chr5	119801142	119801143	PRR16	51334	1122	CGI	FALSE	TRUE	FALSE
cg12477903	chr5	176829557	176829558	PFN3	345456	-1919	CGI	TRUE	TRUE	FALSE
cg12487540	chr5	140734931	140734932	PCDHGA4	56111	162	CGI	TRUE	TRUE	FALSE
cg12600378	chr5	52405361	52405362	MOCS2	4338	235	CGI	TRUE	TRUE	FALSE
cg12833872	chr5	501863	501864	SLC9A3	6550	22684	CGI	FALSE	TRUE	FALSE
cg12940822	chr5	127873397	127873398	FBN2	2201	517	CGI	TRUE	FALSE	FALSE
cg12995800	chr5	151304312	151304313	GLRA1	2741	83	CGI	TRUE	FALSE	FALSE
cg13004182	chr5	172665707	172665708	NKX2-5	1482	-3391	CGI	FALSE	FALSE	TRUE
cg13031251	chr5	77268734	77268735	TBCA	6902	-196548	CGI	FALSE	FALSE	TRUE
cg13276570	chr5	10567643	10567644	ANKRD33B	651746	3207	CGI-S-Shore	FALSE	TRUE	FALSE
cg13403503	chr5	1359585	1359586	CLPTM1L	81037	-14582	CGI	FALSE	FALSE	TRUE
cg13647155	chr5	176046497	176046498	GPRIN1	114787	-9365	CGI	FALSE	FALSE	TRUE
cg13648373	chr5	55291004	55291005	IL6ST	3572	-182	CGI	TRUE	FALSE	FALSE
cg13717023	chr5	53606639	53606640	ARL15	54622	-235	CGI	TRUE	FALSE	FALSE
cg13904970	chr5	123987667	123987668	ZNF608	57507	96831	CGI	FALSE	TRUE	FALSE
cg13944219	chr5	65440479	65440480	SREK1	140890	393	CGI	TRUE	TRUE	FALSE
cg13985234	chr5	138582143	138582144	SNHG4	724102	-27296	Non-CGI	FALSE	FALSE	TRUE
cg14450273	chr5	35266759	35266760	PRLR	5618	-35935	Non-CGI	FALSE	FALSE	TRUE
cg14451382	chr5	1876397	1876398	IRX4	50805	6481	CGI	FALSE	FALSE	TRUE
cg14477868	chr5	92938260	92938261	MIR2277	100313887	18232	CGI	FALSE	FALSE	TRUE
cg14492773	chr5	56469900	56469901	GPBP1	65056	124	CGI	TRUE	FALSE	FALSE
cg14502484	chr5	1446208	1446209	SLC6A3	6531	-664	CGI	TRUE	FALSE	FALSE
cg14546471	chr5	65892027	65892028	MAST4	375449	-147	CGI	TRUE	FALSE	FALSE
cg14557064	chr5	1752840	1752841	MIR4277	100422966	-43856	CGI	FALSE	FALSE	TRUE
cg14560022	chr5	172189315	172189316	DUSP1	1843	8886	CGI-N-Shore	FALSE	FALSE	TRUE
cg14647640	chr5	1257147	1257148	SLC6A18	348932	31676	CGI	FALSE	TRUE	FALSE
cg14732324	chr5	528621	528622	SLC9A3	6550	-4071	CGI	FALSE	FALSE	TRUE
cg14824848	chr5	145214744	145214745	PRELID2	153768	153	CGI	TRUE	FALSE	FALSE
cg14844341	chr5	139089549	139089550	CXXC5	51523	61247	CGI	FALSE	FALSE	TRUE
cg14871923	chr5	176244740	176244741	UNC5A	90249	7179	CGI	FALSE	TRUE	FALSE
cg15042995	chr5	156693055	156693056	CYFIP2	26999	-34	CGI	TRUE	FALSE	FALSE
cg15108727	chr5	3104873	3104874	C5orf38	153571	352610	CGI	FALSE	FALSE	TRUE
cg15188908	chr5	1840272	1840273	NDUFS6	4726	38775	CGI	FALSE	FALSE	TRUE
cg15197065	chr5	78985562	78985563	CMYA5	202333	-95	CGI	TRUE	FALSE	FALSE
cg15288179	chr5	32585739	32585740	SUB1	10923	133	CGI	FALSE	TRUE	FALSE
cg15409013	chr5	5139855	5139856	ADAMTS16	170690	-586	CGI	TRUE	FALSE	FALSE
cg15421363	chr5	131826865	131826866	IRF1	3659	4392	CGI	TRUE	TRUE	FALSE
cg15545486	chr5	180688281	180688282	TRIM52	84851	-161	CGI	TRUE	FALSE	FALSE
cg15553598	chr5	175792973	175792974	ARL10	285598	470	CGI	FALSE	TRUE	FALSE
cg15650209	chr5	1866463	1866464	IRX4	50805	16415	CGI	FALSE	FALSE	TRUE
cg15713707	chr5	169930905	169930906	KCNMB1	3779	-114266	CGI-N-Shore	TRUE	TRUE	FALSE
cg15829642	chr5	140744983	140744984	PCDHGA5	56110	1084	CGI	TRUE	TRUE	FALSE
cg15911153	chr5	138730783	138730784	PROB1	389333	100	CGI	TRUE	FALSE	FALSE
cg15927720	chr5	168728149	168728150	SLIT3	6586	-15	CGI	TRUE	FALSE	FALSE
cg15949044	chr5	140864549	140864550	PCDHGC4	56098	-190	CGI	TRUE	TRUE	FALSE
cg16027343	chr5	180632948	180632949	TRIM7	81786	-770	CGI	TRUE	FALSE	FALSE
cg16099804	chr5	83680253	83680254	EDIL3	10085	356	CGI	TRUE	FALSE	FALSE
cg16151151	chr5	50683467	50683468	ISL1	3670	4508	CGI	FALSE	TRUE	FALSE
cg16257051	chr5	153862183	153862184	HAND1	9421	-4358	CGI	FALSE	FALSE	TRUE
cg16294152	chr5	418696	418697	C5orf55	116349	24560	CGI-S-Shore	FALSE	TRUE	FALSE
cg16318053	chr5	50679147	50679148	ISL1	3670	188	CGI	TRUE	FALSE	FALSE
cg16420798	chr5	146614386	146614387	STK32A	202374	-191	CGI	TRUE	FALSE	FALSE
cg16485558	chr5	63461566	63461567	RNF180	285671	-103	CGI	TRUE	FALSE	FALSE
cg16512661	chr5	2743620	2743621	IRX2	153572	8147	CGI	FALSE	FALSE	TRUE
cg16593646	chr5	71616216	71616217	PTCD2	79810	15	CGI	TRUE	FALSE	FALSE
cg16635016	chr5	176292569	176292570	HK3	3101	33762	CGI	FALSE	TRUE	FALSE
cg16671301	chr5	1289283	1289284	TERT	7015	5877	CGI	FALSE	TRUE	FALSE
cg16703956	chr5	1446217	1446218	SLC6A3	6531	-673	CGI	TRUE	FALSE	FALSE
cg17030055	chr5	24645065	24645066	CDH10	1008	18	Non-CGI	TRUE	FALSE	FALSE
cg17039936	chr5	89769860	89769861	MBLAC2	153364	723	CGI	TRUE	FALSE	FALSE
cg17178888	chr5	159739851	159739852	CCNJL	79616	26746	CGI	TRUE	TRUE	FALSE
cg17279652	chr5	180622276	180622277	TRIM7	81786	9899	CGI	FALSE	TRUE	FALSE
cg17329494	chr5	65018961	65018962	NLN	57486	937	CGI-S-Shore	TRUE	TRUE	FALSE
cg17368581	chr5	72512191	72512192	TMEM174	134288	43167	CGI	FALSE	FALSE	TRUE
cg17415451	chr5	11589049	11589050	CTNND2	1501	315059	Non-CGI	TRUE	TRUE	FALSE
cg17417198	chr5	77590955	77590956	AP3B1	8546	-426	CGI	TRUE	FALSE	FALSE
cg17465930	chr5	138630302	138630303	SNORA74A	26821	15832	CGI	FALSE	TRUE	FALSE
cg17487170	chr5	133451259	133451260	TCF7	6932	856	CGI	TRUE	TRUE	FALSE
cg17555825	chr5	76924190	76924191	OTP	23440	10330	CGI	FALSE	FALSE	TRUE
cg17721879	chr5	158532473	158532474	EBF1	1879	-5684	CGI	FALSE	TRUE	FALSE
cg17733824	chr5	1099592	1099593	SLC12A7	10723	12578	CGI	FALSE	TRUE	FALSE
cg17840719	chr5	178368253	178368254	ZNF454	285676	58	CGI	TRUE	FALSE	FALSE
cg17996329	chr5	176057427	176057428	SNCB	6620	128	CGI	TRUE	FALSE	FALSE
cg18000693	chr5	20616486	20616487	CDH18	1016	-40503	CGI	FALSE	TRUE	FALSE
cg18022036	chr5	19288941	19288942	CDH18	1016	1287039	CGI	FALSE	FALSE	TRUE
cg18045100	chr5	3764541	3764542	IRX1	79192	168372	CGI	FALSE	FALSE	TRUE
cg18084215	chr5	125936716	125936717	PHAX	51808	108	CGI	TRUE	FALSE	FALSE
cg18250028	chr5	71015523	71015524	CARTPT	9607	532	CGI	FALSE	TRUE	FALSE
cg18274480	chr5	145713863	145713864	POU4F3	5459	-4722	CGI	FALSE	FALSE	TRUE
cg18275316	chr5	3607063	3607064	IRX1	79192	10894	CGI-S-Shore	FALSE	FALSE	TRUE
cg18456747	chr5	94957269	94957270	GPR150	285601	1288	CGI-S-Shore	TRUE	FALSE	FALSE
cg18507379	chr5	140787507	140787508	PCDHGB6	56100	-261	CGI	TRUE	TRUE	FALSE
cg18512156	chr5	172661970	172661971	NKX2-5	1482	343	CGI	TRUE	FALSE	FALSE
cg18631996	chr5	139526080	139526081	IGIP	492311	20558	CGI	FALSE	FALSE	TRUE
cg18640250	chr5	1855934	1855935	IRX4	50805	26944	CGI	FALSE	FALSE	TRUE
cg18671773	chr5	141016477	141016478	RELL2	285613	-38	CGI	TRUE	FALSE	FALSE
cg18725076	chr5	11904912	11904913	CTNND2	1501	-801	CGI-S-Shore	TRUE	FALSE	FALSE
cg18765565	chr5	669397	669398	TPPP	11076	24111	CGI	FALSE	TRUE	FALSE
cg18782991	chr5	140479979	140479980	PCDHB3	56132	-253	CGI-N-Shore	TRUE	TRUE	FALSE
cg18839637	chr5	140723684	140723685	PCDHGA3	56112	82	CGI	TRUE	TRUE	FALSE
cg19078576	chr5	17217877	17217878	BASP1	10409	126	CGI	TRUE	FALSE	FALSE
cg19096358	chr5	178547695	178547696	ZNF354C	30832	60087	CGI	FALSE	TRUE	FALSE
cg19101154	chr5	1524249	1524250	LPCAT1	79888	-172	CGI	TRUE	FALSE	FALSE
cg19437285	chr5	148650972	148650973	AFAP1L1	134265	-427	CGI	TRUE	FALSE	FALSE
cg19503640	chr5	1503763	1503764	LPCAT1	79888	20311	CGI	FALSE	TRUE	FALSE
cg19504702	chr5	153862394	153862395	HAND1	9421	-4569	CGI	FALSE	FALSE	TRUE
cg19726536	chr5	179225537	179225538	MIR1229	100302156	-190	CGI-S-Shore	TRUE	TRUE	FALSE
cg19734801	chr5	131281112	131281113	ACSL6	23305	66756	CGI	FALSE	TRUE	FALSE
cg19748485	chr5	140743927	140743928	PCDHGA5	56110	28	CGI	TRUE	TRUE	FALSE
cg19806642	chr5	178422140	178422141	GRM6	2916	-15	CGI	TRUE	FALSE	FALSE
cg19897330	chr5	180018201	180018202	SCGB3A1	92304	284	CGI	FALSE	TRUE	FALSE
cg19951105	chr5	131134354	131134355	RAPGEF6	51735	-1597	CGI-S-Shore	TRUE	FALSE	FALSE
cg19978181	chr5	76923988	76923989	OTP	23440	10532	CGI	FALSE	FALSE	TRUE
cg20563910	chr5	174152033	174152034	MSX2	4488	457	CGI	TRUE	FALSE	FALSE
cg20727434	chr5	170740547	170740548	TLX3	30012	4258	CGI	FALSE	FALSE	TRUE
cg21012711	chr5	179921286	179921287	CNOT6	57472	-129	CGI	TRUE	FALSE	FALSE
cg21042902	chr5	176873577	176873578	PRR7	80758	-217	CGI	TRUE	TRUE	FALSE
cg21151287	chr5	14488003	14488004	FAM105A	54491	-93886	CGI	FALSE	TRUE	FALSE
cg21231288	chr5	54529787	54529788	CCNO	10309	-278	CGI	TRUE	FALSE	FALSE
cg21545862	chr5	174159294	174159295	MSX2	4488	7718	CGI	FALSE	FALSE	TRUE
cg21614303	chr5	134366377	134366378	PITX1	5307	3585	CGI-S-Shore	FALSE	TRUE	FALSE
cg21627409	chr5	140810106	140810107	PCDHGA12	26025	-50	CGI-N-Shore	TRUE	TRUE	FALSE
cg21747070	chr5	957535	957536	LOC100506688	100506688	39918	CGI-S-Shore	FALSE	FALSE	TRUE
cg21757970	chr5	4867543	4867544	LOC340094	340094	-166927	CGI-S-Shore	FALSE	FALSE	TRUE
cg21800232	chr5	79866368	79866369	ANKRD34B	340120	-63	CGI	TRUE	FALSE	FALSE
cg21938261	chr5	146257862	146257863	PPP2R2B	5521	203190	CGI	TRUE	TRUE	FALSE
cg22056094	chr5	140719962	140719963	PCDHGA2	56113	1607	CGI	TRUE	TRUE	FALSE
cg22139166	chr5	124071107	124071108	ZNF608	57507	13391	Non-CGI	FALSE	TRUE	FALSE
cg22156700	chr5	72732486	72732487	BTF3	689	-61762	CGI	FALSE	FALSE	TRUE
cg22510662	chr5	36202853	36202854	NADKD1	133686	39403	Non-CGI	FALSE	TRUE	FALSE
cg22574802	chr5	44388596	44388597	FGF10	2255	186	CGI-N-Shore	TRUE	FALSE	FALSE
cg22637837	chr5	140730092	140730093	PCDHGB1	56104	263	CGI-S-Shore	TRUE	TRUE	FALSE
cg22711621	chr5	65017248	65017249	SGTB	54557	691	CGI	TRUE	TRUE	FALSE
cg22924680	chr5	43557135	43557136	PAIP1	10605	384	CGI	TRUE	TRUE	FALSE
cg22985016	chr5	497397	497398	PP7080	25845	-24316	CGI-S-Shore	FALSE	TRUE	FALSE
cg22995692	chr5	141263164	141263165	PCDH1	5097	-5219	CGI	FALSE	FALSE	TRUE
cg23221052	chr5	179740743	179740744	MAPK9	5601	-21671	CGI	FALSE	TRUE	FALSE
cg23244790	chr5	140811102	140811103	PCDHGA12	26025	943	CGI	TRUE	TRUE	FALSE
cg23280778	chr5	34915766	34915767	BRIX1	55299	-52	CGI	TRUE	TRUE	FALSE
cg23357526	chr5	177790659	177790660	AGXT2L2	85007	-130855	Non-CGI	FALSE	TRUE	FALSE
cg23481438	chr5	150537565	150537566	ANXA6	309	-121	CGI-S-Shore	TRUE	FALSE	FALSE
cg23491790	chr5	1053774	1053775	MIR4635	100616479	9313	CGI	FALSE	TRUE	FALSE
cg24585418	chr5	179059426	179059427	HNRNPH1	3187	-7755	CGI	FALSE	FALSE	TRUE
cg24769403	chr5	159414366	159414367	TTC1	7265	-21812	CGI	FALSE	FALSE	TRUE
cg24805089	chr5	176860947	176860948	GRK6	2870	7259	CGI	FALSE	TRUE	FALSE
cg24854181	chr5	6823241	6823242	MIR4278	100422999	4791	CGI	FALSE	FALSE	TRUE
cg24908814	chr5	132947725	132947726	FSTL4	23105	496	CGI	FALSE	TRUE	FALSE
cg24940370	chr5	1835328	1835329	NDUFS6	4726	33831	CGI	FALSE	FALSE	TRUE
cg24943459	chr5	1039407	1039408	MIR4635	100616479	23680	CGI	FALSE	FALSE	TRUE
cg24963443	chr5	180673122	180673123	GNB2L1	10399	-2215	CGI	FALSE	FALSE	TRUE
cg24984653	chr5	83018280	83018281	HAPLN1	1404	-1383	CGI	TRUE	FALSE	FALSE
cg25025437	chr5	75377968	75377969	SV2C	22987	-1335	CGI	TRUE	FALSE	FALSE
cg25090514	chr5	2038743	2038744	IRX4	50805	-155862	CGI	FALSE	FALSE	TRUE
cg25131453	chr5	110428033	110428034	WDR36	134430	162	CGI	TRUE	FALSE	FALSE
cg25142702	chr5	6378806	6378807	MED10	84246	-166	CGI	TRUE	FALSE	FALSE
cg25328403	chr5	179159884	179159885	MAML1	9794	32	CGI	TRUE	FALSE	FALSE
cg25338204	chr5	175955105	175955106	RNF44	22838	9919	CGI-N-Shore	FALSE	TRUE	FALSE
cg25340688	chr5	135416398	135416399	VTRNA2-1	100126299	-111	CGI	TRUE	FALSE	FALSE
cg25373100	chr5	76506484	76506485	PDE8B	8622	-220	CGI	TRUE	FALSE	FALSE
cg25440811	chr5	149535765	149535766	PDGFRB	5159	-342	Non-CGI	TRUE	FALSE	FALSE
cg25442600	chr5	1888033	1888034	IRX4	50805	-5152	CGI-S-Shore	FALSE	FALSE	TRUE
cg25449484	chr5	92929372	92929373	NR2F1	7025	10328	CGI	FALSE	TRUE	FALSE
cg25477576	chr5	167696167	167696168	WWC1	23286	-22896	CGI-N-Shore	FALSE	FALSE	TRUE
cg25500080	chr5	140346199	140346200	PCDHAC2	56134	451	CGI	TRUE	TRUE	FALSE
cg25568066	chr5	126205045	126205046	LMNB1	4001	92729	CGI	FALSE	TRUE	FALSE
cg25592564	chr5	4866442	4866443	LOC340094	340094	-168028	CGI	FALSE	FALSE	TRUE
cg25613061	chr5	177823856	177823857	AGXT2L2	85007	-164052	CGI	FALSE	TRUE	FALSE
cg25645199	chr5	171533681	171533682	STK10	6793	81663	CGI	FALSE	TRUE	FALSE
cg25664622	chr5	40679863	40679864	PTGER4	5734	-167	CGI	TRUE	FALSE	FALSE
cg25667000	chr5	176270808	176270809	UNC5A	90249	33247	CGI	FALSE	TRUE	FALSE
cg25669900	chr5	133861733	133861734	PHF15	23338	1666	CGI	TRUE	TRUE	FALSE
cg25962358	chr5	140347293	140347294	PCDHAC2	56134	1545	CGI	TRUE	TRUE	FALSE
cg26078977	chr5	59189467	59189468	PART1	25859	-594071	CGI	TRUE	TRUE	FALSE
cg26135573	chr5	179059668	179059669	HNRNPH1	3187	-7997	CGI	FALSE	FALSE	TRUE
cg26144909	chr5	2262036	2262037	IRX4	50805	-379155	CGI	FALSE	FALSE	TRUE
cg26195356	chr5	2743601	2743602	IRX2	153572	8166	CGI	FALSE	FALSE	TRUE
cg26286839	chr5	79378955	79378956	THBS4	7060	47784	CGI-S-Shore	FALSE	TRUE	FALSE
cg26301389	chr5	139048106	139048107	CXXC5	51523	19804	CGI	FALSE	TRUE	FALSE
cg26328633	chr5	135416394	135416395	VTRNA2-1	100126299	-107	CGI	TRUE	FALSE	FALSE
cg26330510	chr5	1155853	1155854	SLC12A7	10723	-43680	CGI	FALSE	FALSE	TRUE
cg26422488	chr5	16935950	16935951	MYO10	4651	433	CGI	TRUE	FALSE	FALSE
cg26437826	chr5	76936361	76936362	OTP	23440	-1838	CGI	TRUE	FALSE	FALSE
cg26479667	chr5	3339581	3339582	LOC285577	285577	196625	CGI	FALSE	FALSE	TRUE
cg26517171	chr5	170735347	170735348	TLX3	30012	-939	CGI	TRUE	FALSE	FALSE
cg26541920	chr5	524127	524128	SLC9A3	6550	420	CGI	FALSE	TRUE	FALSE
cg26605683	chr5	172751269	172751270	STC2	8614	5235	CGI	FALSE	TRUE	FALSE
cg26624732	chr5	70746330	70746331	BDP1	55814	-5110	Non-CGI	FALSE	FALSE	TRUE
cg26664161	chr5	135265937	135265938	FBXL21	26223	-67	CGI	TRUE	FALSE	FALSE
cg26817546	chr5	135538704	135538705	LOC389332	389332	-9852	Non-CGI	FALSE	FALSE	TRUE
cg26827966	chr5	172189374	172189375	DUSP1	1843	8827	CGI	FALSE	FALSE	TRUE
cg26841017	chr5	34929960	34929961	DNAJC21	134218	261	CGI	TRUE	FALSE	FALSE
cg26886462	chr5	155108449	155108450	SGCD	6444	-26612	CGI	FALSE	FALSE	TRUE
cg26896946	chr5	135416405	135416406	VTRNA2-1	100126299	-118	CGI	TRUE	FALSE	FALSE
cg26900724	chr5	176901661	176901662	DBN1	1627	-966	CGI-S-Shore	TRUE	FALSE	FALSE
cg27090784	chr5	147862681	147862682	FBXO38	81545	99134	CGI-S-Shore	FALSE	TRUE	FALSE
cg27107171	chr5	119799864	119799865	PRR16	51334	-153	CGI-N-Shore	TRUE	FALSE	FALSE
cg27122725	chr5	142781723	142781724	NR3C1	2908	33352	CGI	TRUE	TRUE	FALSE
cg27145495	chr5	1910693	1910694	IRX4	50805	-27812	CGI	FALSE	FALSE	TRUE
cg27638727	chr5	36066944	36066945	UGT3A2	167127	77	Non-CGI	TRUE	FALSE	FALSE
cg00070899	chr6	34024479	34024480	MIR1275	100302123	-56650	CGI	FALSE	TRUE	FALSE
cg00090619	chr6	33160286	33160287	COL11A2	1302	-40	CGI	TRUE	FALSE	FALSE
cg00344870	chr6	16761174	16761175	ATXN1	6310	545	CGI	FALSE	TRUE	FALSE
cg00364016	chr6	10113648	10113649	LOC100130275	100130275	-298901	Non-CGI	FALSE	TRUE	FALSE
cg00472801	chr6	62995876	62995877	KHDRBS2	202559	222	CGI	TRUE	FALSE	FALSE
cg00520393	chr6	7313623	7313624	SSR1	6745	-81	CGI	TRUE	FALSE	FALSE
cg00525277	chr6	32064239	32064240	TNXB	7148	21230	CGI	FALSE	TRUE	FALSE
cg00534550	chr6	33281526	33281527	TAPBP	6892	636	CGI	FALSE	TRUE	FALSE
cg00621943	chr6	31646236	31646237	LY6G5C	80741	5579	CGI-N-Shelf	FALSE	TRUE	FALSE
cg00641409	chr6	21666778	21666779	LINC00340	401237	1774	CGI	TRUE	TRUE	FALSE
cg00740861	chr6	35772794	35772795	LHFPL5	222662	-275	CGI	TRUE	FALSE	FALSE
cg00799826	chr6	30071200	30071201	TRIM31	11074	9665	CGI	FALSE	TRUE	FALSE
cg00872984	chr6	32063991	32063992	TNXB	7148	21478	CGI	FALSE	TRUE	FALSE
cg01152056	chr6	166260319	166260320	LINC00602	441177	-140718	CGI	FALSE	TRUE	FALSE
cg01153979	chr6	79577195	79577196	IRAK1BP1	134728	5	CGI	TRUE	FALSE	FALSE
cg01345395	chr6	170525514	170525515	LOC154449	154449	46141	CGI-N-Shelf	FALSE	FALSE	TRUE
cg01402746	chr6	30616468	30616469	C6orf136	221545	1651	CGI-S-Shore	FALSE	TRUE	FALSE
cg01445151	chr6	3445256	3445257	SLC22A23	63027	11535	Non-CGI	TRUE	TRUE	FALSE
cg01461410	chr6	85473773	85473774	TBX18	9096	124	CGI	TRUE	FALSE	FALSE
cg01905633	chr6	3849391	3849392	FAM50B	26240	-239	CGI	TRUE	FALSE	FALSE
cg02001200	chr6	28864703	28864704	TRIM27	5987	27063	CGI	TRUE	FALSE	FALSE
cg02106850	chr6	85474093	85474094	TBX18	9096	-193	CGI	TRUE	FALSE	FALSE
cg02183231	chr6	46459224	46459225	RCAN2	10231	578	CGI	TRUE	TRUE	FALSE
cg02192490	chr6	168085530	168085531	C6orf123	26238	112007	Non-CGI	TRUE	TRUE	FALSE
cg02279224	chr6	144386160	144386161	PLAGL1	5325	-424	CGI	TRUE	FALSE	FALSE
cg02287436	chr6	26970418	26970419	LOC100270746	100270746	17665	Non-CGI	FALSE	TRUE	FALSE
cg02391713	chr6	105400985	105400986	LIN28B	389421	-3936	CGI	FALSE	FALSE	TRUE
cg02401102	chr6	117923454	117923455	GOPC	57120	249	CGI	TRUE	FALSE	FALSE
cg02526986	chr6	117198743	117198744	RFX6	222546	366	CGI-S-Shore	FALSE	TRUE	FALSE
cg02562419	chr6	159049626	159049627	DYNLT1	6993	16176	CGI	FALSE	TRUE	FALSE
cg02601318	chr6	30882384	30882385	VARS2	57176	795	CGI	TRUE	TRUE	FALSE
cg02621130	chr6	166267729	166267730	LINC00602	441177	-133308	CGI	FALSE	TRUE	FALSE
cg02662362	chr6	33084814	33084815	HLA-DPB2	3116	4520	CGI	FALSE	TRUE	FALSE
cg02735058	chr6	16181250	16181251	MIR4639	100616269	39471	CGI	FALSE	FALSE	TRUE
cg02781060	chr6	41341168	41341169	NCR2	9436	37639	CGI	FALSE	FALSE	TRUE
cg02862674	chr6	44238426	44238427	TMEM151B	441151	-52	CGI	TRUE	FALSE	FALSE
cg02895156	chr6	105401601	105401602	LIN28B	389421	-3320	CGI	FALSE	FALSE	TRUE
cg03007511	chr6	27205383	27205384	PRSS16	10279	-10117	CGI-N-Shore	TRUE	FALSE	FALSE
cg03024372	chr6	54711476	54711477	FAM83B	222584	-91	CGI	TRUE	FALSE	FALSE
cg03063185	chr6	86303159	86303160	SNX14	57231	468	CGI	FALSE	TRUE	FALSE
cg03108344	chr6	150326762	150326763	RAET1K	646024	-481	CGI-S-Shore	TRUE	FALSE	FALSE
cg03124091	chr6	30640593	30640594	DHX16	8449	235	CGI	TRUE	TRUE	FALSE
cg03198009	chr6	29648604	29648605	ZFP57	346171	-3672	CGI	FALSE	FALSE	TRUE
cg03214422	chr6	11538071	11538072	TMEM170B	100113407	-438	CGI	TRUE	FALSE	FALSE
cg03298716	chr6	168196351	168196352	C6orf123	26238	1186	CGI-N-Shore	FALSE	TRUE	FALSE
cg03325733	chr6	146864759	146864760	RAB32	10981	-67	CGI	TRUE	FALSE	FALSE
cg03329755	chr6	167189272	167189273	RPS6KA2	6196	86497	CGI	FALSE	TRUE	FALSE
cg03347739	chr6	53787668	53787669	MLIP	90523	-96044	Non-CGI	FALSE	TRUE	FALSE
cg03422527	chr6	32154568	32154569	AGER	177	-2468	CGI-N-Shelf	FALSE	TRUE	FALSE
cg03438552	chr6	32805548	32805549	TAP2	6891	997	CGI-N-Shore	TRUE	TRUE	FALSE
cg03475293	chr6	7051303	7051304	RREB1	6239	-56525	CGI	FALSE	FALSE	TRUE
cg03521696	chr6	29795595	29795596	HLA-H	3136	-16	CGI	TRUE	TRUE	FALSE
cg03597347	chr6	28058909	28058910	ZSCAN12P1	221584	-18	CGI	TRUE	TRUE	FALSE
cg03637007	chr6	86548232	86548233	SNHG5	387066	-159780	CGI	FALSE	FALSE	TRUE
cg03641492	chr6	168859954	168859955	SMOC2	64094	18122	CGI-S-Shore	FALSE	TRUE	FALSE
cg03709091	chr6	48036409	48036410	PTCHD4	442213	42532	CGI	TRUE	TRUE	FALSE
cg03761477	chr6	41472416	41472417	FOXP4	116113	-41746	CGI	FALSE	TRUE	FALSE
cg03824617	chr6	146920113	146920114	ADGB	79747	-21	CGI	TRUE	FALSE	FALSE
cg03903398	chr6	33967989	33967990	MIR1275	100302123	-160	CGI-N-Shore	TRUE	FALSE	FALSE
cg04014105	chr6	110797476	110797477	SLC22A16	85413	366	CGI	TRUE	TRUE	FALSE
cg04017513	chr6	30658894	30658895	NRM	11270	162	CGI	TRUE	FALSE	FALSE
cg04191297	chr6	33359192	33359193	KIFC1	3833	-119	CGI	TRUE	FALSE	FALSE
cg04194745	chr6	44119578	44119579	CAPN11	11131	-6968	CGI-N-Shore	FALSE	TRUE	FALSE
cg04221606	chr6	151646552	151646553	ZBTB2	57621	66123	CGI-N-Shore	TRUE	TRUE	FALSE
cg04227237	chr6	52529066	52529067	LOC730101	730101	-131	CGI	TRUE	FALSE	FALSE
cg04227254	chr6	31856329	31856330	EHMT2	10919	9133	CGI	FALSE	TRUE	FALSE
cg04249522	chr6	166218512	166218513	PDE10A	10846	-142923	CGI	FALSE	TRUE	FALSE
cg04406454	chr6	10398494	10398495	LOC100130275	100130275	-14055	CGI	FALSE	TRUE	FALSE
cg04450994	chr6	3318592	3318593	PSMG4	389362	59429	Non-CGI	FALSE	TRUE	FALSE
cg04520169	chr6	29894195	29894196	HCG4B	80868	-766	CGI	TRUE	TRUE	FALSE
cg04600618	chr6	43612980	43612981	RSPH9	221421	212	CGI	TRUE	FALSE	FALSE
cg04623837	chr6	29943414	29943415	HCG9	10255	521	CGI	FALSE	TRUE	FALSE
cg04768479	chr6	30095292	30095293	TRIM40	135644	-8591	CGI	TRUE	FALSE	FALSE
cg05022673	chr6	56819429	56819430	BEND6	221336	-342	CGI	TRUE	FALSE	FALSE
cg05106897	chr6	34433775	34433776	PACSIN1	29993	-76	CGI	TRUE	FALSE	FALSE
cg05151867	chr6	74073965	74073966	KHDC3L	154288	1564	CGI	FALSE	FALSE	TRUE
cg05183646	chr6	134491143	134491144	HMGA1P7	387065	-52324	CGI	FALSE	TRUE	FALSE
cg05298677	chr6	36355542	36355543	ETV7	51513	33	CGI	TRUE	FALSE	FALSE
cg05402854	chr6	111408840	111408841	SLC16A10	117247	58	CGI	TRUE	FALSE	FALSE
cg05404698	chr6	28956247	28956248	ZNF311	282890	16844	CGI-N-Shore	TRUE	FALSE	FALSE
cg05452406	chr6	10881891	10881892	GCM2	9247	205	CGI-N-Shore	FALSE	TRUE	FALSE
cg05495478	chr6	164172519	164172520	QKI	9444	336843	CGI	FALSE	TRUE	FALSE
cg05504194	chr6	160182624	160182625	ACAT2	39	-363	CGI	TRUE	TRUE	FALSE
cg05513455	chr6	105388269	105388270	LIN28B	389421	-16652	CGI-N-Shore	FALSE	FALSE	TRUE
cg05587282	chr6	75915885	75915886	COL12A1	1303	-261	CGI	TRUE	FALSE	FALSE
cg05680111	chr6	32047122	32047123	TNXB	7148	38347	CGI-S-Shore	FALSE	TRUE	FALSE
cg05755900	chr6	33258515	33258516	PFDN6	10471	1136	CGI-S-Shore	TRUE	TRUE	FALSE
cg05795316	chr6	168790253	168790254	SMOC2	64094	-51576	CGI-S-Shore	FALSE	FALSE	TRUE
cg05826626	chr6	32820862	32820863	TAP1	6890	884	CGI	TRUE	FALSE	FALSE
cg05843339	chr6	143268816	143268817	HIVEP2	3097	-2477	CGI	FALSE	FALSE	TRUE
cg05871781	chr6	31620172	31620173	APOM	55937	-47	CGI	TRUE	TRUE	FALSE
cg05920635	chr6	55039622	55039623	HCRTR2	3062	550	CGI	FALSE	TRUE	FALSE
cg05927817	chr6	18020357	18020358	KIF13A	63971	-32502	CGI	FALSE	FALSE	TRUE
cg05942459	chr6	101846805	101846806	GRIK2	2898	135	CGI	TRUE	TRUE	FALSE
cg05950711	chr6	56112590	56112591	COL21A1	81578	146300	CGI-S-Shore	TRUE	TRUE	FALSE
cg05959834	chr6	26108372	26108373	HIST1H1T	3010	-7	CGI	TRUE	FALSE	FALSE
cg05960309	chr6	71337681	71337682	SMAP1	60682	-39796	CGI	FALSE	FALSE	TRUE
cg06558014	chr6	100051116	100051117	PRDM13	59336	-3532	CGI	FALSE	FALSE	TRUE
cg06759058	chr6	28602864	28602865	SCAND3	114821	-47751	CGI	TRUE	FALSE	FALSE
cg06815976	chr6	32164816	32164817	GPSM3	63940	-1515	CGI-S-Shore	TRUE	TRUE	FALSE
cg06921943	chr6	33267569	33267570	RGL2	5863	-403	CGI	TRUE	TRUE	FALSE
cg06928741	chr6	31691430	31691431	C6orf25	80739	308	CGI	TRUE	TRUE	FALSE
cg06953601	chr6	52441809	52441810	TRAM2	9697	51	CGI	TRUE	FALSE	FALSE
cg07178031	chr6	27778236	27778237	HIST1H3H	8357	2258	CGI	TRUE	FALSE	FALSE
cg07219955	chr6	46703538	46703539	PLA2G7	7941	-107	CGI-S-Shore	TRUE	FALSE	FALSE
cg07292773	chr6	156718177	156718178	ARID1B	57492	-380885	CGI	FALSE	FALSE	TRUE
cg07411432	chr6	108487100	108487101	NR2E1	7101	-113	CGI	TRUE	FALSE	FALSE
cg07507918	chr6	144385806	144385807	PLAGL1	5325	-70	CGI	TRUE	FALSE	FALSE
cg07515565	chr6	1624386	1624387	FOXC1	2296	13704	CGI	FALSE	TRUE	FALSE
cg07718321	chr6	96025334	96025335	MANEA	79694	-37	CGI	TRUE	FALSE	FALSE
cg07739478	chr6	31692234	31692235	C6orf25	80739	1112	CGI-S-Shore	FALSE	TRUE	FALSE
cg07797068	chr6	31774620	31774621	LSM2	57819	139	CGI	TRUE	FALSE	FALSE
cg07923390	chr6	35109242	35109243	TCP11	6954	-54	CGI	TRUE	FALSE	FALSE
cg08001895	chr6	94129582	94129583	EPHA7	2045	-281	CGI	TRUE	FALSE	FALSE
cg08057899	chr6	32122460	32122461	LOC100507547	100507547	-317	CGI	TRUE	TRUE	FALSE
cg08173692	chr6	166721155	166721156	PRR18	285800	714	CGI	TRUE	FALSE	FALSE
cg08194879	chr6	123317569	123317570	CLVS2	134829	-11	CGI	TRUE	FALSE	FALSE
cg08342332	chr6	4079704	4079705	C6orf201	404220	263	CGI	TRUE	TRUE	FALSE
cg08375234	chr6	169274118	169274119	THBS2	7058	380017	CGI	FALSE	FALSE	TRUE
cg08383338	chr6	46703225	46703226	PLA2G7	7941	203	CGI	TRUE	TRUE	FALSE
cg08384314	chr6	30711680	30711681	IER3	8870	645	CGI	TRUE	TRUE	FALSE
cg08547352	chr6	38128956	38128957	ZFAND3	60685	341648	CGI	FALSE	FALSE	TRUE
cg08548396	chr6	30095549	30095550	TRIM40	135644	-8334	CGI	TRUE	FALSE	FALSE
cg08550317	chr6	3850732	3850733	FAM50B	26240	1099	CGI	TRUE	TRUE	FALSE
cg08597764	chr6	3752433	3752434	PXDC1	221749	-186	CGI	TRUE	FALSE	FALSE
cg08709879	chr6	33359098	33359099	KIFC1	3833	-213	CGI-N-Shore	TRUE	FALSE	FALSE
cg08791234	chr6	33267781	33267782	RGL2	5863	-615	CGI	TRUE	TRUE	FALSE
cg08866794	chr6	42104596	42104597	C6orf132	647024	6117	Non-CGI	FALSE	TRUE	FALSE
cg08880054	chr6	32820868	32820869	TAP1	6890	878	CGI	TRUE	FALSE	FALSE
cg09060588	chr6	88299742	88299743	RARS2	57038	-6	CGI	TRUE	FALSE	FALSE
cg09086201	chr6	50692495	50692496	TFAP2D	83741	11237	CGI	FALSE	TRUE	FALSE
cg09086442	chr6	168079212	168079213	C6orf123	26238	118325	CGI	FALSE	TRUE	FALSE
[truncated: 22,786 more rows]
