# Supplementary material for: H3K4me1 marks DNA regions hypomethylated during aging in human stem and differentiated cells
Source: HighWire-hosted journal article supplement (doi:10.1101/gr.169011.113), 2014-09-30
Supplement: Supplemental_Table_16.xlsx [file Supplemental_Table_16.xlsx]

## Sheet: ST16
Supplemental Table 16: List of CpG sites where the increase in Euclidean distance (ED) (> 2-fold) with age was less than could be accounted for solely by interindividual variability
Target ID	Chromosome	start	end	nearest.gene	nearest.gene.id	disttotss	hmm.cpgi	prom.reg	intra.reg	inter.reg
cg00031456	chr1	109234919	109234920	PRPF38B	55119	-11	CGI	TRUE	FALSE	FALSE
cg00035249	chr1	228270481	228270482	ARF1	375	119	CGI	TRUE	TRUE	FALSE
cg00036263	chr1	245852353	245852354	KIF26B	55083	534065	CGI	FALSE	TRUE	FALSE
cg00102714	chr1	207925343	207925344	CD46	4179	-38	CGI	TRUE	FALSE	FALSE
cg00113194	chr1	884869	884870	NOC2L	26155	9808	CGI-N-Shore	FALSE	TRUE	FALSE
cg00116430	chr1	94188268	94188269	MIR760	100126348	-124118	Non-CGI	FALSE	TRUE	FALSE
cg00157179	chr1	2383687	2383688	PLCH2	9651	-24065	CGI-S-Shelf	FALSE	FALSE	TRUE
cg00172330	chr1	28052294	28052295	FAM76A	199870	-194	CGI	TRUE	FALSE	FALSE
cg00254532	chr1	155243310	155243311	HCN3	57657	-4062	CGI	TRUE	TRUE	FALSE
cg00329300	chr1	161008462	161008463	TSTD1	100131187	310	CGI	FALSE	TRUE	FALSE
cg00371368	chr1	239550378	239550379	CHRM3	1131	512	CGI	TRUE	FALSE	FALSE
cg00564737	chr1	196847182	196847183	CFHR2	3080	-65750	CGI-N-Shore	FALSE	TRUE	FALSE
cg00570896	chr1	51443449	51443450	CDKN2C	1031	9840	CGI	FALSE	FALSE	TRUE
cg00659878	chr1	229706242	229706243	ABCB10	23456	-11799	Non-CGI	FALSE	FALSE	TRUE
cg00756215	chr1	55230057	55230058	PARS2	25973	167	CGI	FALSE	TRUE	FALSE
cg00777636	chr1	6446216	6446217	ACOT7	11332	7608	Non-CGI	TRUE	TRUE	FALSE
cg00778905	chr1	3541386	3541387	TPRG1L	127262	-168	CGI	TRUE	FALSE	FALSE
cg00787537	chr1	211307839	211307840	KCNH1	3756	-381	CGI-S-Shore	TRUE	FALSE	FALSE
cg00851154	chr1	26690578	26690579	ZNF683	257101	8686	CGI-S-Shelf	FALSE	TRUE	FALSE
cg00889627	chr1	1959630	1959631	GABRD	2563	8861	CGI	FALSE	TRUE	FALSE
cg00891176	chr1	201082731	201082732	CACNA1S	779	-1036	CGI-N-Shore	TRUE	FALSE	FALSE
cg00931619	chr1	6052495	6052496	NPHP4	261734	36	CGI	TRUE	FALSE	FALSE
cg00941229	chr1	149982400	149982401	OTUD7B	56957	284	CGI	TRUE	FALSE	FALSE
cg00969680	chr1	113466087	113466088	AKR7A2P1	246182	114	CGI	TRUE	TRUE	FALSE
cg00997310	chr1	3789280	3789281	DFFB	1677	15434	CGI-N-Shore	FALSE	TRUE	FALSE
cg01065413	chr1	222791514	222791515	MIA3	375056	69	CGI	TRUE	FALSE	FALSE
cg01103597	chr1	25242147	25242148	RUNX3	864	49463	CGI-S-Shore	FALSE	TRUE	FALSE
cg01395650	chr1	197170599	197170600	CRB1	23418	6	CGI	TRUE	FALSE	FALSE
cg01411786	chr1	201709390	201709391	MIR1231	100302158	-68347	CGI	FALSE	TRUE	FALSE
cg01430725	chr1	36930006	36930007	MRPS15	64960	32	CGI	TRUE	FALSE	FALSE
cg01566242	chr1	150266242	150266243	MRPS21	54460	-25	CGI	TRUE	FALSE	FALSE
cg01712692	chr1	240986708	240986709	GREM2	64388	-211245	CGI	FALSE	TRUE	FALSE
cg01716680	chr1	35259750	35259751	GJA4	2701	1578	CGI-S-Shore	TRUE	TRUE	FALSE
cg01780585	chr1	36348359	36348360	2001-08-01	26523	12949	CGI-N-Shore	TRUE	TRUE	FALSE
cg01924755	chr1	45805834	45805835	MUTYH	4595	306	CGI	TRUE	TRUE	FALSE
cg01928145	chr1	28282258	28282259	XKR8	55113	-4244	CGI-N-Shelf	FALSE	TRUE	FALSE
cg02100343	chr1	31538517	31538518	PUM1	9698	244	CGI	TRUE	TRUE	FALSE
cg02275243	chr1	5920514	5920515	MIR4689	100616421	2285	CGI-S-Shore	FALSE	FALSE	TRUE
cg02276822	chr1	3559697	3559698	WRAP73	49856	6972	CGI	FALSE	TRUE	FALSE
cg02338271	chr1	171868115	171868116	DNM3	26052	57493	Non-CGI	FALSE	TRUE	FALSE
cg02395396	chr1	52435307	52435308	RAB3B	5865	21127	Non-CGI	FALSE	TRUE	FALSE
cg02623028	chr1	23003569	23003570	C1QB	713	23886	CGI	FALSE	FALSE	TRUE
cg02624558	chr1	202777611	202777612	KDM5B	10765	-61	CGI	TRUE	FALSE	FALSE
cg02638691	chr1	209849185	209849186	G0S2	50486	514	CGI	TRUE	TRUE	FALSE
cg02666627	chr1	18931477	18931478	PAX7	5081	-26021	CGI	FALSE	FALSE	TRUE
cg02711976	chr1	36023590	36023591	KIAA0319L	79932	-38	CGI	TRUE	TRUE	FALSE
cg02899039	chr1	249152378	249152379	ZNF692	55657	935	CGI-N-Shore	TRUE	TRUE	FALSE
cg02900441	chr1	15911134	15911135	AGMAT	79814	469	CGI-N-Shore	FALSE	TRUE	FALSE
cg03043663	chr1	2344561	2344562	PEX10	5192	-550	CGI	TRUE	FALSE	FALSE
cg03102494	chr1	147801721	147801722	PPIAL4B	653505	153696	CGI	FALSE	TRUE	FALSE
cg03111285	chr1	230561693	230561694	PGBD5	79605	-48301	CGI	FALSE	FALSE	TRUE
cg03133876	chr1	16532990	16532991	ARHGEF19	128272	6112	CGI	FALSE	TRUE	FALSE
cg03226554	chr1	28573817	28573818	ATPIF1	93974	11214	CGI	FALSE	FALSE	TRUE
cg03342366	chr1	47184735	47184736	EFCAB14	9813	0	CGI	TRUE	FALSE	FALSE
cg03347170	chr1	27648560	27648561	TMEM222	84065	-74	CGI	TRUE	FALSE	FALSE
cg03427058	chr1	1565025	1565026	MMP23B	8510	-2533	CGI	TRUE	TRUE	FALSE
cg03587150	chr1	154193741	154193742	C1orf43	25912	-467	CGI	TRUE	TRUE	FALSE
cg03605784	chr1	31769832	31769833	ZCCHC17	51538	-8	CGI	TRUE	FALSE	FALSE
cg03752218	chr1	47696788	47696789	TAL1	6886	1102	CGI	TRUE	TRUE	FALSE
cg03769927	chr1	27480849	27480850	SLC9A1	6548	600	CGI-S-Shore	TRUE	FALSE	FALSE
cg03971454	chr1	43770557	43770558	TIE1	7075	3990	CGI-N-Shore	TRUE	TRUE	FALSE
cg03973866	chr1	16270229	16270230	ZBTB17	7709	32396	CGI	FALSE	TRUE	FALSE
cg04125625	chr1	29564120	29564121	PTPRU	10076	1091	CGI	FALSE	TRUE	FALSE
cg04143909	chr1	234367322	234367323	MIR4671	100616380	-74889	CGI	FALSE	TRUE	FALSE
cg04166042	chr1	50896246	50896247	DMRTA2	63950	-7126	CGI-S-Shelf	FALSE	FALSE	TRUE
cg04279832	chr1	3548991	3548992	TPRG1L	127262	7434	CGI	FALSE	TRUE	FALSE
cg04363624	chr1	47697965	47697966	TAL1	6886	-72	CGI	TRUE	TRUE	FALSE
cg04392971	chr1	161369648	161369649	C1orf192	257177	-31983	CGI	TRUE	FALSE	FALSE
cg04484947	chr1	32931323	32931324	ZBTB8A	653121	664	CGI-S-Shore	FALSE	TRUE	FALSE
cg04504182	chr1	202777459	202777460	KDM5B	10765	88	CGI	TRUE	FALSE	FALSE
cg04835163	chr1	74663899	74663900	FPGT-TNNI3K	100526835	2	CGI	TRUE	FALSE	FALSE
cg04868078	chr1	197898229	197898230	LHX9	56956	16593	Non-CGI	FALSE	TRUE	FALSE
cg04869838	chr1	147801437	147801438	PPIAL4B	653505	153980	CGI	TRUE	TRUE	FALSE
cg04886391	chr1	23345709	23345710	KDM1A	23028	-230	CGI-N-Shore	TRUE	FALSE	FALSE
cg04892409	chr1	170501224	170501225	GORAB	92344	-37	CGI	TRUE	FALSE	FALSE
cg05120156	chr1	228290290	228290291	C1orf35	79169	730	CGI	FALSE	TRUE	FALSE
cg05352303	chr1	220445520	220445521	RAB3GAP2	25782	321	CGI	FALSE	TRUE	FALSE
cg05394663	chr1	228248785	228248786	ARF1	375	-21574	CGI	FALSE	TRUE	FALSE
cg05630111	chr1	150948030	150948031	CERS2	29956	-550	CGI-S-Shore	TRUE	FALSE	FALSE
cg05639522	chr1	247681581	247681582	GCSAML	148823	11186	CGI	TRUE	TRUE	FALSE
cg05642789	chr1	1564482	1564483	MMP23B	8510	-3076	CGI-S-Shore	TRUE	TRUE	FALSE
cg05697866	chr1	2437200	2437201	PANK4	55229	20833	CGI	FALSE	FALSE	TRUE
cg05721645	chr1	246729578	246729579	TFB2M	64216	-12	CGI	TRUE	FALSE	FALSE
cg05802073	chr1	53581841	53581842	SLC1A7	6512	26446	Non-CGI	TRUE	TRUE	FALSE
cg05802452	chr1	228194476	228194477	WNT3A	89780	-245	CGI	TRUE	FALSE	FALSE
cg05923595	chr1	33547713	33547714	ADC	113451	998	CGI	TRUE	TRUE	FALSE
cg06034096	chr1	74663680	74663681	LRRIQ3	127255	189	CGI	TRUE	FALSE	FALSE
cg06098761	chr1	210405808	210405809	SERTAD4	56256	-385	CGI	TRUE	TRUE	FALSE
cg06173481	chr1	153658650	153658651	NPR1	4881	7485	CGI-N-Shelf	FALSE	TRUE	FALSE
cg06178322	chr1	16010345	16010346	PLEKHM2	23207	-480	CGI-N-Shore	TRUE	FALSE	FALSE
cg06194479	chr1	118472240	118472241	GDAP2	54834	60	CGI	TRUE	FALSE	FALSE
cg06217312	chr1	150552348	150552349	MCL1	4170	-133	CGI	TRUE	FALSE	FALSE
cg06346857	chr1	21877579	21877580	ALPL	249	41720	Non-CGI	TRUE	TRUE	FALSE
cg06372391	chr1	62785079	62785080	KANK4	163782	2	CGI	TRUE	FALSE	FALSE
cg06456464	chr1	9352752	9352753	SPSB1	80176	-187	CGI	TRUE	FALSE	FALSE
cg06524630	chr1	205898442	205898443	SLC26A9	115019	14144	Non-CGI	TRUE	TRUE	FALSE
cg06525051	chr1	202927473	202927474	ADIPOR1	51094	225	CGI	TRUE	TRUE	FALSE
cg06619807	chr1	8011102	8011103	TNFRSF9	3604	-7876	CGI-N-Shore	FALSE	FALSE	TRUE
cg06649280	chr1	24438781	24438782	MYOM3	127294	-115	CGI	TRUE	FALSE	FALSE
cg06650246	chr1	206897270	206897271	MAPKAPK2	9261	38904	Non-CGI	FALSE	TRUE	FALSE
cg06804846	chr1	6535492	6535493	TNFRSF25	8718	-9236	CGI-S-Shore	FALSE	TRUE	FALSE
cg06866616	chr1	2455264	2455265	PANK4	55229	2769	CGI	FALSE	TRUE	FALSE
cg06866827	chr1	2948464	2948465	ACTRT2	140625	10417	CGI	FALSE	FALSE	TRUE
cg06899053	chr1	33896703	33896704	PHC2	1912	-87	CGI	TRUE	FALSE	FALSE
cg06946154	chr1	246887942	246887943	SCCPDH	51097	563	CGI	FALSE	TRUE	FALSE
cg06988368	chr1	147142773	147142774	ACP6	51205	-138	CGI	TRUE	FALSE	FALSE
cg07029226	chr1	2104223	2104224	C1orf86	199990	34947	CGI-S-Shore	FALSE	TRUE	FALSE
cg07029873	chr1	217311014	217311015	ESRRG	2104	81	CGI	TRUE	FALSE	FALSE
cg07049833	chr1	222791172	222791173	MIA3	375056	-270	CGI	TRUE	FALSE	FALSE
cg07091412	chr1	20810651	20810652	CAMK2N1	55450	2075	CGI	FALSE	TRUE	FALSE
cg07135408	chr1	236908002	236908003	MTR	4548	-50577	Non-CGI	FALSE	TRUE	FALSE
cg07379140	chr1	95538546	95538547	ALG14	199857	-38	CGI	TRUE	FALSE	FALSE
cg07719884	chr1	43824467	43824468	CDC20	991	-157	CGI	TRUE	FALSE	FALSE
cg07723921	chr1	112531332	112531333	KCND3	3752	443	CGI-N-Shore	TRUE	TRUE	FALSE
cg07792636	chr1	27878409	27878410	AHDC1	27245	51950	CGI	TRUE	TRUE	FALSE
cg07793638	chr1	6675684	6675685	PHF13	148479	1927	CGI	FALSE	TRUE	FALSE
cg07802625	chr1	32281665	32281666	SPOCD1	90853	-84	Non-CGI	TRUE	FALSE	FALSE
cg07906262	chr1	41303570	41303571	CITED4	163732	24446	CGI	FALSE	TRUE	FALSE
cg07959491	chr1	204347150	204347151	LINC00628	127841	-8302	CGI	FALSE	FALSE	TRUE
cg07972116	chr1	2822822	2822823	ACTRT2	140625	-115222	CGI	FALSE	FALSE	TRUE
cg08036524	chr1	3426422	3426423	MIR551A	693135	50930	CGI-S-Shore	FALSE	TRUE	FALSE
cg08109624	chr1	242220925	242220926	MAP1LC3C	440738	-58539	CGI	FALSE	FALSE	TRUE
cg08121453	chr1	248855364	248855365	OR14I1	401994	-9758	CGI	FALSE	FALSE	TRUE
cg08249619	chr1	205498018	205498019	CDK18	5129	24333	CGI-N-Shore	FALSE	TRUE	FALSE
cg08264835	chr1	20716191	20716192	LOC339505	339505	39094	Non-CGI	FALSE	TRUE	FALSE
cg08273935	chr1	2518354	2518355	FAM213B	127281	454	CGI	TRUE	TRUE	FALSE
cg08355353	chr1	113217657	113217658	MOV10	4343	608	CGI	TRUE	TRUE	FALSE
cg08479603	chr1	19638460	19638461	AKR7A2	8574	178	CGI	TRUE	FALSE	FALSE
cg08529295	chr1	245132782	245132783	EFCAB2	84288	-387	CGI-N-Shore	TRUE	FALSE	FALSE
cg08643472	chr1	16302298	16302299	ZBTB17	7709	327	CGI	FALSE	TRUE	FALSE
cg08706732	chr1	29448625	29448626	TMEM200B	399474	1794	CGI	TRUE	TRUE	FALSE
cg08719467	chr1	146714230	146714231	CHD1L	9557	-59	CGI	TRUE	FALSE	FALSE
cg08719577	chr1	3528355	3528356	MEGF6	1953	-295	CGI	TRUE	FALSE	FALSE
cg08732750	chr1	87598351	87598352	LOC339524	339524	139660	CGI	TRUE	TRUE	FALSE
cg08856919	chr1	8484157	8484158	SLC45A1	50651	99766	CGI	TRUE	TRUE	FALSE
cg08876274	chr1	3028230	3028231	MIR4251	100422968	-16307	CGI	FALSE	TRUE	FALSE
cg08887707	chr1	3613723	3613724	TP73	7161	44593	CGI-N-Shore	TRUE	TRUE	FALSE
cg08900371	chr1	210407556	210407557	SERTAD4-AS1	574036	-89	CGI	TRUE	TRUE	FALSE
cg08915090	chr1	202777584	202777585	KDM5B	10765	-34	CGI	TRUE	FALSE	FALSE
cg08928753	chr1	43770707	43770708	TIE1	7075	4140	CGI	TRUE	TRUE	FALSE
cg08937380	chr1	55446131	55446132	TMEM61	199964	-332	CGI	TRUE	FALSE	FALSE
cg09062638	chr1	23003490	23003491	C1QB	713	23807	CGI-N-Shore	FALSE	FALSE	TRUE
cg09075558	chr1	228246780	228246781	ARF1	375	-23579	CGI	FALSE	TRUE	FALSE
cg09107594	chr1	247877081	247877082	OR6F1	343169	-1023	Non-CGI	TRUE	FALSE	FALSE
cg09133006	chr1	206680888	206680889	RASSF5	83593	8	CGI	TRUE	FALSE	FALSE
cg09255966	chr1	2334136	2334137	PEX10	5192	9872	CGI	FALSE	TRUE	FALSE
cg09265619	chr1	6659205	6659206	KLHL21	9903	3722	CGI	FALSE	TRUE	FALSE
cg09276842	chr1	1155026	1155027	TNFRSF4	7293	-5477	CGI	TRUE	TRUE	FALSE
cg09321097	chr1	226187056	226187057	SDE2	163859	8	CGI	TRUE	FALSE	FALSE
cg09364122	chr1	942198	942199	HES4	57801	-6645	CGI-N-Shore	FALSE	FALSE	TRUE
cg09411356	chr1	228395756	228395757	OBSCN	84033	-103	CGI-N-Shelf	TRUE	TRUE	FALSE
cg09414948	chr1	16490791	16490792	EPHA2	1969	-8208	CGI-S-Shore	FALSE	FALSE	TRUE
cg09470268	chr1	18617697	18617698	IGSF21	84966	183456	CGI	FALSE	TRUE	FALSE
cg09502069	chr1	224372558	224372559	DEGS1	8560	1647	CGI-S-Shore	FALSE	TRUE	FALSE
cg09586322	chr1	32706085	32706086	MTMR9LP	339483	1224	CGI	TRUE	TRUE	FALSE
cg09637004	chr1	41483537	41483538	SLFNL1-AS1	100507178	3274	CGI	TRUE	TRUE	FALSE
cg09755039	chr1	161129745	161129746	USP21	27005	490	CGI	FALSE	TRUE	FALSE
cg09769134	chr1	67217769	67217770	TCTEX1D1	200132	-369	CGI-N-Shore	TRUE	FALSE	FALSE
cg09867184	chr1	153939684	153939685	SLC39A1	27173	502	CGI	TRUE	TRUE	FALSE
cg10038185	chr1	68517273	68517274	DIRAS3	9077	-791	CGI	TRUE	TRUE	FALSE
cg10096873	chr1	92546470	92546471	BTBD8	284697	607	CGI	FALSE	TRUE	FALSE
cg10103446	chr1	77685150	77685151	PIGK	10026	-17	CGI	TRUE	FALSE	FALSE
cg10108612	chr1	19203999	19204000	MIR4695	100616120	5773	CGI	FALSE	TRUE	FALSE
cg10121294	chr1	26516508	26516509	CATSPER4	378807	-609	Non-CGI	TRUE	FALSE	FALSE
cg10127162	chr1	197170891	197170892	CRB1	23418	298	CGI	TRUE	TRUE	FALSE
cg10208113	chr1	1179747	1179748	FAM132A	388581	2353	CGI	FALSE	TRUE	FALSE
cg10313417	chr1	40420809	40420810	MFSD2A	84879	24	CGI	TRUE	FALSE	FALSE
cg10314909	chr1	2524890	2524891	FAM213B	127281	6990	CGI-S-Shore	FALSE	TRUE	FALSE
cg10333268	chr1	231004326	231004327	C1orf198	84886	1007	CGI	TRUE	TRUE	FALSE
cg10433463	chr1	1889099	1889100	TMEM52	339456	-38358	CGI	FALSE	TRUE	FALSE
cg10440578	chr1	115397857	115397858	SYCP1	6847	401	CGI	FALSE	TRUE	FALSE
cg10530644	chr1	212965113	212965114	NSL1	25936	24	CGI	TRUE	FALSE	FALSE
cg10533103	chr1	212688961	212688962	ATF3	467	-49713	CGI	FALSE	FALSE	TRUE
cg10578696	chr1	65532742	65532743	MIR101-1	406893	-8550	CGI	FALSE	FALSE	TRUE
cg10626236	chr1	1631100	1631101	MMP23A	8511	-276	CGI	TRUE	TRUE	FALSE
cg10629420	chr1	3377918	3377919	ARHGEF16	27237	6770	CGI	FALSE	TRUE	FALSE
cg10709494	chr1	115323130	115323131	SIKE1	80143	176	CGI	TRUE	FALSE	FALSE
cg10877147	chr1	9648619	9648620	TMEM201	199953	-311	CGI	TRUE	FALSE	FALSE
cg10888031	chr1	2938799	2938800	ACTRT2	140625	752	CGI	TRUE	FALSE	FALSE
cg10950111	chr1	228337379	228337380	GJC2	57165	-34	Non-CGI	TRUE	FALSE	FALSE
cg11166453	chr1	247681781	247681782	GCSAML	148823	11386	CGI	TRUE	TRUE	FALSE
cg11176493	chr1	228248237	228248238	ARF1	375	-22122	CGI-S-Shore	FALSE	TRUE	FALSE
cg11185975	chr1	155715418	155715419	MSTO2P	100129405	-189	CGI	TRUE	TRUE	FALSE
cg11200797	chr1	1016470	1016471	RNF223	401934	-6782	CGI-S-Shore	FALSE	FALSE	TRUE
cg11237215	chr1	244806055	244806056	DESI2	51029	-10295	CGI-N-Shore	FALSE	FALSE	TRUE
cg11378242	chr1	244999800	244999801	COX20	116228	1160	CGI-S-Shore	FALSE	TRUE	FALSE
cg11401257	chr1	226926945	226926946	ITPKB	3707	-68	CGI	TRUE	FALSE	FALSE
cg11415975	chr1	24194453	24194454	FUCA1	2517	404	CGI	TRUE	FALSE	FALSE
cg11505113	chr1	213125130	213125131	VASH2	79805	1242	CGI-S-Shore	TRUE	TRUE	FALSE
cg11521998	chr1	1536054	1536055	C1orf233	643988	-577	CGI	TRUE	FALSE	FALSE
cg11570511	chr1	16543021	16543022	ARHGEF19	128272	-3916	CGI	FALSE	FALSE	TRUE
cg11582018	chr1	87598069	87598070	LOC339524	339524	139378	CGI	TRUE	TRUE	FALSE
cg11661940	chr1	201776894	201776895	MIR1231	100302158	-843	Non-CGI	TRUE	TRUE	FALSE
cg11689813	chr1	229570052	229570053	ACTA1	58	-208	CGI	TRUE	FALSE	FALSE
cg11692307	chr1	2426035	2426036	PLCH2	9651	18280	CGI-S-Shore	FALSE	TRUE	FALSE
cg11721177	chr1	22919873	22919874	EPHA8	2046	29868	CGI	FALSE	TRUE	FALSE
cg11732134	chr1	10732912	10732913	CASZ1	54897	123793	CGI	FALSE	TRUE	FALSE
cg11746651	chr1	3664612	3664613	TP73-AS1	57212	-674	CGI-S-Shore	TRUE	FALSE	FALSE
cg11817309	chr1	249152443	249152444	ZNF692	55657	870	CGI-N-Shore	TRUE	TRUE	FALSE
cg11821626	chr1	150947403	150947404	CERS2	29956	74	CGI	TRUE	FALSE	FALSE
cg11834658	chr1	21611224	21611225	LOC100506801	100506801	-8557	Non-CGI	FALSE	TRUE	FALSE
cg11857025	chr1	109633344	109633345	TMEM167B	56900	-57	CGI	TRUE	FALSE	FALSE
cg11913218	chr1	10754156	10754157	CASZ1	54897	102549	CGI	FALSE	TRUE	FALSE
cg11951427	chr1	35351903	35351904	DLGAP3	58512	19079	CGI-S-Shore	FALSE	TRUE	FALSE
cg12070724	chr1	205238533	205238534	TMCC2	9911	41494	CGI	TRUE	TRUE	FALSE
cg12141218	chr1	209799248	209799249	MIR4260	100422894	-2392	Non-CGI	FALSE	TRUE	FALSE
cg12219387	chr1	1154157	1154158	TNFRSF4	7293	-4608	CGI	TRUE	TRUE	FALSE
cg12297374	chr1	19038550	19038551	PAX7	5081	81049	Non-CGI	FALSE	TRUE	FALSE
cg12400807	chr1	23752503	23752504	TCEA3	6920	-1241	CGI-S-Shore	TRUE	FALSE	FALSE
cg12406391	chr1	6520194	6520195	TNFRSF25	8718	6059	CGI	FALSE	TRUE	FALSE
cg12467595	chr1	19920571	19920572	C1orf151-NBL1	100532736	-2898	CGI-N-Shelf	FALSE	FALSE	TRUE
cg12469361	chr1	982189	982190	AGRN	375790	26685	CGI	FALSE	TRUE	FALSE
cg12581547	chr1	62657689	62657690	L1TD1	54596	-2783	CGI-N-Shelf	FALSE	FALSE	TRUE
cg12629448	chr1	152733025	152733026	KPRP	448834	2518	CGI	TRUE	TRUE	FALSE
cg12634306	chr1	40098811	40098812	HEYL	26508	6535	CGI	TRUE	TRUE	FALSE
cg12651044	chr1	150241550	150241551	APH1A	51107	57	CGI	TRUE	FALSE	FALSE
cg12663321	chr1	46972470	46972471	DMBX1	127343	-196	Non-CGI	TRUE	FALSE	FALSE
cg12666727	chr1	42128487	42128488	EDN2	1907	-178142	CGI	FALSE	TRUE	FALSE
cg12690066	chr1	153662408	153662409	NPR1	4881	11243	CGI	FALSE	TRUE	FALSE
cg12730853	chr1	64935328	64935329	CACHD1	57685	-1146	CGI-N-Shore	TRUE	FALSE	FALSE
cg12741345	chr1	155052737	155052738	LOC100505666	100505666	-16269	CGI	FALSE	TRUE	FALSE
cg12753558	chr1	247464072	247464073	ZNF496	84838	30971	CGI	FALSE	TRUE	FALSE
cg12902497	chr1	8938815	8938816	ENO1-AS1	100505975	-77	CGI	TRUE	FALSE	FALSE
cg12905085	chr1	32054510	32054511	TINAGL1	64129	12423	CGI	FALSE	FALSE	TRUE
cg13056990	chr1	4736099	4736100	AJAP1	55966	20993	CGI	FALSE	TRUE	FALSE
cg13060157	chr1	113286610	113286611	FAM19A3	284467	23420	CGI	FALSE	FALSE	TRUE
cg13112404	chr1	182921688	182921689	SHCBP1L	81626	863	CGI	FALSE	TRUE	FALSE
cg13182731	chr1	32208634	32208635	MIR4254	100423028	15700	CGI	FALSE	TRUE	FALSE
cg13209113	chr1	3272732	3272733	ARHGEF16	27237	-98413	CGI-N-Shore	FALSE	TRUE	FALSE
cg13232357	chr1	151042823	151042824	GABPB2	126626	-255	CGI-N-Shore	TRUE	FALSE	FALSE
cg13234569	chr1	207818036	207818037	CR1L	1379	-420	CGI-N-Shore	TRUE	FALSE	FALSE
cg13391456	chr1	24127242	24127243	GALE	2582	50	CGI	TRUE	FALSE	FALSE
cg13393580	chr1	1295077	1295078	MXRA8	54587	2078	CGI-N-Shore	TRUE	TRUE	FALSE
cg13426876	chr1	18691894	18691895	KLHDC7A	127707	-115528	CGI	FALSE	TRUE	FALSE
cg13437711	chr1	91317248	91317249	BARHL2	343472	-134453	CGI	TRUE	FALSE	FALSE
cg13566436	chr1	25240865	25240866	RUNX3	864	50745	CGI-N-Shore	FALSE	TRUE	FALSE
cg13675568	chr1	44872075	44872076	RNF220	55182	1114	CGI	FALSE	TRUE	FALSE
cg13779567	chr1	233431268	233431269	PCNXL2	80003	189	CGI	TRUE	FALSE	FALSE
cg13786801	chr1	59042745	59042746	TACSTD2	4070	419	CGI	TRUE	FALSE	FALSE
cg13898430	chr1	25292274	25292275	RUNX3	864	-661	CGI-S-Shore	TRUE	FALSE	FALSE
cg13914636	chr1	3623102	3623103	TP73-AS1	57212	40833	CGI	FALSE	TRUE	FALSE
cg13921652	chr1	144931966	144931967	LOC653513	653513	108024	CGI	TRUE	TRUE	FALSE
cg13935009	chr1	205497713	205497714	CDK18	5129	24028	CGI-N-Shore	FALSE	TRUE	FALSE
cg13993673	chr1	3447740	3447741	MIR551A	693135	29612	CGI	TRUE	TRUE	FALSE
cg14010405	chr1	89357911	89357912	GTF2B	2959	-609	CGI-S-Shore	TRUE	FALSE	FALSE
cg14151682	chr1	20959926	20959927	PINK1	65018	-20	CGI	TRUE	FALSE	FALSE
cg14206273	chr1	10734693	10734694	CASZ1	54897	122012	CGI-S-Shore	FALSE	TRUE	FALSE
cg14216290	chr1	109825773	109825774	PSRC1	84722	33	CGI	TRUE	FALSE	FALSE
cg14216876	chr1	2717193	2717194	TTC34	100287898	-10962	CGI	FALSE	FALSE	TRUE
cg14422488	chr1	32538997	32538998	TMEM39B	55116	493	CGI	FALSE	TRUE	FALSE
cg14455487	chr1	42800860	42800861	FOXJ3	22887	686	CGI	TRUE	TRUE	FALSE
cg14522944	chr1	1961743	1961744	GABRD	2563	10974	CGI	FALSE	TRUE	FALSE
cg14531560	chr1	16085371	16085372	FBLIM1	54751	2216	CGI	FALSE	TRUE	FALSE
cg14565265	chr1	90308951	90308952	LRRC8D	55144	22377	CGI	FALSE	TRUE	FALSE
cg14667685	chr1	39249604	39249605	MYCBP	26292	89444	CGI	FALSE	FALSE	TRUE
cg14788660	chr1	155278430	155278431	FDPS	2224	-107	CGI-N-Shore	TRUE	FALSE	FALSE
cg14836248	chr1	7209987	7209988	CAMTA1	23261	364602	CGI	FALSE	TRUE	FALSE
cg14992232	chr1	20811153	20811154	CAMK2N1	55450	1573	CGI	FALSE	TRUE	FALSE
cg15015892	chr1	151810887	151810888	LOC100132111	100132111	-56	CGI	TRUE	TRUE	FALSE
cg15030449	chr1	2780395	2780396	TTC34	100287898	-74164	CGI-S-Shore	FALSE	FALSE	TRUE
cg15036616	chr1	15930123	15930124	DDI2	84301	-13828	CGI	FALSE	FALSE	TRUE
cg15084543	chr1	79472408	79472409	ELTD1	64123	85	CGI	TRUE	FALSE	FALSE
cg15097019	chr1	28241038	28241039	RPA2	6118	196	CGI	TRUE	FALSE	FALSE
cg15099632	chr1	165738557	165738558	UCK2	7371	-58173	CGI	TRUE	TRUE	FALSE
cg15108640	chr1	240071966	240071967	RPS7P5	645884	-98856	CGI	TRUE	TRUE	FALSE
cg15116327	chr1	32741619	32741620	HDAC1	3065	-16087	CGI	FALSE	TRUE	FALSE
cg15207993	chr1	153591313	153591314	S100A14	57402	-2504	Non-CGI	FALSE	TRUE	FALSE
cg15472210	chr1	232766496	232766497	SIPA1L2	57568	-115252	CGI	FALSE	FALSE	TRUE
cg15521792	chr1	145590148	145590149	NUDT17	200035	-712	CGI-S-Shore	TRUE	FALSE	FALSE
cg15522353	chr1	39547558	39547559	MACF1	23499	468	CGI	FALSE	TRUE	FALSE
cg15550572	chr1	2064441	2064442	C1orf86	199990	74729	CGI	FALSE	TRUE	FALSE
cg15604190	chr1	6052593	6052594	NPHP4	261734	-59	CGI	TRUE	FALSE	FALSE
cg15642292	chr1	150253842	150253843	C1orf51	148523	-1109	CGI-N-Shore	TRUE	FALSE	FALSE
cg15685922	chr1	156045208	156045209	MEX3A	92312	6579	CGI-N-Shore	FALSE	TRUE	FALSE
cg15891747	chr1	202896310	202896311	KLHL12	59349	1415	CGI	TRUE	TRUE	FALSE
cg15934415	chr1	115212914	115212915	DENND2C	163259	128	CGI	TRUE	FALSE	FALSE
cg15934879	chr1	26495928	26495929	ZNF593	51042	-458	CGI-N-Shore	TRUE	FALSE	FALSE
cg15979171	chr1	2171212	2171213	SKI	6497	11077	CGI	FALSE	TRUE	FALSE
cg16023415	chr1	20692812	20692813	LOC339505	339505	62473	CGI	FALSE	TRUE	FALSE
cg16026015	chr1	16060480	16060481	SLC25A34	284723	-2327	CGI	FALSE	TRUE	FALSE
cg16029875	chr1	204320179	204320180	PLEKHA6	22874	8863	Non-CGI	FALSE	TRUE	FALSE
cg16136338	chr1	20208717	20208718	OTUD3	23252	-169	CGI-N-Shore	TRUE	FALSE	FALSE
cg16169620	chr1	155827015	155827016	GON4L	54856	2174	CGI	TRUE	TRUE	FALSE
cg16247817	chr1	153747686	153747687	SLC27A3	11000	-80	CGI	TRUE	FALSE	FALSE
cg16258463	chr1	93811274	93811275	LOC100131564	100131564	92	CGI	TRUE	TRUE	FALSE
cg16272425	chr1	2337198	2337199	PEX10	5192	6810	CGI	FALSE	TRUE	FALSE
cg16353957	chr1	197880663	197880664	LHX9	56956	-970	CGI	TRUE	FALSE	FALSE
cg16358430	chr1	92952192	92952193	GFI1	2672	239	CGI	TRUE	TRUE	FALSE
cg16384593	chr1	1840436	1840437	CALML6	163688	-5828	CGI	FALSE	FALSE	TRUE
cg16388674	chr1	1910431	1910432	KIAA1751	85452	24843	CGI	FALSE	TRUE	FALSE
cg16411979	chr1	117603108	117603109	TTF2	8458	158	CGI	FALSE	TRUE	FALSE
cg16427321	chr1	10917344	10917345	CASZ1	54897	-60636	CGI-N-Shore	FALSE	FALSE	TRUE
cg16430402	chr1	5947386	5947387	MIR4689	100616421	-24584	CGI	FALSE	TRUE	FALSE
cg16488304	chr1	151119217	151119218	SEMA6C	10500	-76	CGI	TRUE	FALSE	FALSE
cg16580496	chr1	38156394	38156395	C1orf109	54955	1492	CGI	TRUE	TRUE	FALSE
cg16598600	chr1	50891456	50891457	DMRTA2	63950	-2336	CGI	FALSE	FALSE	TRUE
cg16648140	chr1	2434046	2434047	PANK4	55229	23987	CGI	FALSE	TRUE	FALSE
cg16658130	chr1	40942841	40942842	ZFP69	339559	-459	CGI	TRUE	FALSE	FALSE
cg16680547	chr1	14027567	14027568	PRDM2	7799	831	CGI-S-Shore	FALSE	TRUE	FALSE
cg16716189	chr1	113261711	113261712	FAM19A3	284467	-1476	CGI	TRUE	FALSE	FALSE
cg16721191	chr1	185703526	185703527	HMCN1	83872	-155	CGI	TRUE	FALSE	FALSE
cg16815379	chr1	165797173	165797174	TMCO1	54499	-180	CGI	TRUE	TRUE	FALSE
cg16824301	chr1	182573155	182573156	RGS16	6004	391	CGI-N-Shore	FALSE	TRUE	FALSE
cg16993579	chr1	202311052	202311053	UBE2T	29089	40	CGI	TRUE	FALSE	FALSE
cg17098415	chr1	995021	995022	RNF223	401934	14664	CGI	TRUE	FALSE	FALSE
cg17104843	chr1	213032108	213032109	FLVCR1	28982	510	CGI	TRUE	FALSE	FALSE
cg17161388	chr1	37940077	37940078	LOC728431	728431	-32	CGI	TRUE	FALSE	FALSE
cg17165158	chr1	2182612	2182613	SKI	6497	22477	CGI	FALSE	TRUE	FALSE
cg17178218	chr1	7352249	7352250	VAMP3	9341	-479078	Non-CGI	FALSE	TRUE	FALSE
cg17184491	chr1	41483645	41483646	SLFNL1-AS1	100507178	3382	CGI-S-Shore	TRUE	TRUE	FALSE
cg17217195	chr1	3673328	3673329	CCDC27	148870	4362	CGI	FALSE	TRUE	FALSE
cg17243637	chr1	44871099	44871100	RNF220	55182	138	CGI	TRUE	FALSE	FALSE
cg17286074	chr1	3315497	3315498	ARHGEF16	27237	-55648	CGI	FALSE	TRUE	FALSE
cg17420036	chr1	22182143	22182144	LDLRAD2	401944	43384	Non-CGI	FALSE	TRUE	FALSE
cg17423498	chr1	242011256	242011257	EXO1	9156	-235	CGI	TRUE	FALSE	FALSE
cg17456100	chr1	22140859	22140860	LDLRAD2	401944	2100	CGI	FALSE	TRUE	FALSE
cg17506588	chr1	2365491	2365492	PEX10	5192	-21480	CGI	FALSE	FALSE	TRUE
cg17589325	chr1	201924583	201924584	TIMM17A	10440	-34	CGI	TRUE	FALSE	FALSE
cg17589890	chr1	210857205	210857206	HHAT	55733	355608	CGI	FALSE	TRUE	FALSE
cg17600851	chr1	85462857	85462858	MCOLN2	255231	-60	CGI	TRUE	FALSE	FALSE
cg17722231	chr1	1851035	1851036	TMEM52	339456	-294	CGI	TRUE	FALSE	FALSE
cg17786206	chr1	29142254	29142255	OPRD1	4985	3599	CGI-S-Shelf	FALSE	TRUE	FALSE
cg17820306	chr1	156339286	156339287	RHBG	57127	282	CGI-S-Shore	FALSE	TRUE	FALSE
cg17827328	chr1	36817299	36817300	EVA1B	55194	-27543	Non-CGI	FALSE	TRUE	FALSE
cg17841765	chr1	22560699	22560700	WNT4	54361	-90313	Non-CGI	FALSE	FALSE	TRUE
cg17841782	chr1	59762205	59762206	FGGY	55277	-418	CGI	TRUE	FALSE	FALSE
cg17854320	chr1	24829245	24829246	RCAN3AS	100750325	-394	CGI	TRUE	TRUE	FALSE
cg17908602	chr1	117317903	117317904	CD2	914	20816	CGI	FALSE	FALSE	TRUE
cg17928286	chr1	205414220	205414221	MIR135B	442891	3304	Non-CGI	FALSE	FALSE	TRUE
cg17941572	chr1	63784454	63784455	LINC00466	199899	-1552	CGI	TRUE	FALSE	FALSE
cg17973565	chr1	153606594	153606595	S100A13	6284	-25	CGI	TRUE	FALSE	FALSE
cg18021902	chr1	3567119	3567120	WRAP73	49856	-447	CGI-S-Shore	TRUE	FALSE	FALSE
cg18086187	chr1	10057158	10057159	RBP7	116362	-95	CGI	TRUE	FALSE	FALSE
cg18128887	chr1	24861708	24861709	NCMAP	400746	-20857	CGI-N-Shore	FALSE	TRUE	FALSE
cg18136681	chr1	24969531	24969532	SRRM1	10250	-61	CGI	TRUE	FALSE	FALSE
cg18158385	chr1	95392678	95392679	CNN3	1266	55	CGI	TRUE	FALSE	FALSE
cg18172804	chr1	146714232	146714233	CHD1L	9557	-57	CGI	TRUE	FALSE	FALSE
cg18194353	chr1	100315666	100315667	AGL	178	25	CGI	TRUE	FALSE	FALSE
cg18198730	chr1	247681584	247681585	GCSAML	148823	11189	CGI	TRUE	TRUE	FALSE
cg18275321	chr1	70820640	70820641	HHLA3	11147	146	CGI	TRUE	FALSE	FALSE
cg18324862	chr1	6328955	6328956	GPR153	387509	-7919	CGI	FALSE	TRUE	FALSE
cg18814048	chr1	151580708	151580709	SNX27	81609	-3952	CGI-N-Shelf	FALSE	FALSE	TRUE
cg18877525	chr1	244303292	244303293	ZBTB18	10472	88730	CGI	FALSE	FALSE	TRUE
cg18885107	chr1	46664327	46664328	LURAP1	541468	-4677	CGI-S-Shore	TRUE	TRUE	FALSE
cg19081571	chr1	1190137	1190138	FAM132A	388581	-8034	CGI	FALSE	TRUE	FALSE
cg19082003	chr1	231004179	231004180	C1orf198	84886	1154	CGI	TRUE	TRUE	FALSE
cg19159602	chr1	29557611	29557612	MECR	51102	-156	CGI	TRUE	FALSE	FALSE
cg19249107	chr1	55505954	55505955	PCSK9	255738	804	CGI	TRUE	TRUE	FALSE
cg19265480	chr1	147781887	147781888	PPIAL4B	653505	173530	CGI	TRUE	TRUE	FALSE
cg19306368	chr1	59235016	59235017	JUN	3725	14767	CGI	FALSE	FALSE	TRUE
cg19374457	chr1	44412380	44412381	IPO13	9670	-96	CGI	TRUE	FALSE	FALSE
cg19598416	chr1	223936812	223936813	CAPN2	824	47516	CGI	FALSE	TRUE	FALSE
cg19601664	chr1	117284614	117284615	CD2	914	-12470	CGI	FALSE	FALSE	TRUE
cg19706449	chr1	47133793	47133794	ATPAF1	64756	304	CGI	TRUE	TRUE	FALSE
cg19730691	chr1	119526437	119526438	TBX15	6913	5740	CGI	FALSE	TRUE	FALSE
cg19732653	chr1	245848798	245848799	KIF26B	55083	530510	CGI	FALSE	TRUE	FALSE
cg19803229	chr1	2005320	2005321	PRKCZ	5590	23410	CGI	TRUE	TRUE	FALSE
cg19811087	chr1	91184501	91184502	BARHL2	343472	-1706	CGI	TRUE	FALSE	FALSE
cg19827716	chr1	181287967	181287968	CACNA1E	777	-164717	CGI	FALSE	FALSE	TRUE
cg19856705	chr1	234667500	234667501	LOC100506795	100506795	23	CGI	TRUE	FALSE	FALSE
cg20011075	chr1	4008090	4008091	LOC728716	728716	7417	Non-CGI	FALSE	TRUE	FALSE
cg20144521	chr1	2237543	2237544	LOC100129534	100129534	46555	CGI	FALSE	TRUE	FALSE
cg20146241	chr1	24861604	24861605	NCMAP	400746	-20961	CGI-N-Shore	FALSE	TRUE	FALSE
cg20163085	chr1	10510396	10510397	CORT	1325	619	Non-CGI	FALSE	TRUE	FALSE
cg20327061	chr1	6640478	6640479	ZBTB48	3104	421	CGI	FALSE	TRUE	FALSE
cg20335425	chr1	153363264	153363265	S100A8	6279	398	Non-CGI	FALSE	TRUE	FALSE
cg20413202	chr1	10056853	10056854	RBP7	116362	-400	CGI-N-Shore	TRUE	FALSE	FALSE
cg20511194	chr1	45987619	45987620	PRDX1	5052	941	CGI	TRUE	TRUE	FALSE
cg20511268	chr1	45805845	45805846	MUTYH	4595	295	CGI	TRUE	TRUE	FALSE
cg20594982	chr1	976707	976708	AGRN	375790	21203	CGI	FALSE	TRUE	FALSE
cg20613337	chr1	21113199	21113200	HP1BP3	50809	598	CGI	TRUE	TRUE	FALSE
cg20673091	chr1	2541236	2541237	MMEL1	79258	23243	CGI-S-Shore	FALSE	TRUE	FALSE
cg20828333	chr1	5927556	5927557	MIR4689	100616421	-4754	CGI-S-Shore	FALSE	TRUE	FALSE
cg20847090	chr1	23763959	23763960	TCEA3	6920	-12697	CGI-S-Shore	TRUE	TRUE	FALSE
cg20869257	chr1	201252948	201252949	PKP1	5317	367	CGI	TRUE	FALSE	FALSE
cg20994490	chr1	63988814	63988815	ITGB3BP	23421	128	CGI	TRUE	FALSE	FALSE
cg21140898	chr1	51442318	51442319	CDKN2C	1031	8709	CGI	FALSE	FALSE	TRUE
cg21147983	chr1	11897631	11897632	NPPA-AS1	100379251	-2743	CGI	FALSE	TRUE	FALSE
cg21273275	chr1	24648328	24648329	GRHL3	57822	2515	CGI	TRUE	TRUE	FALSE
cg21399703	chr1	247681439	247681440	GCSAML	148823	11044	CGI	TRUE	TRUE	FALSE
cg21576698	chr1	46767971	46767972	LRRC41	10489	1065	CGI	TRUE	TRUE	FALSE
cg21604357	chr1	3027471	3027472	MIR4251	100422968	-17066	CGI-N-Shore	FALSE	TRUE	FALSE
cg21818533	chr1	203299859	203299860	FMOD	2331	20428	CGI-S-Shelf	FALSE	FALSE	TRUE
cg21826784	chr1	11795937	11795938	AGTRAP	57085	-203	CGI-N-Shore	TRUE	FALSE	FALSE
cg21848143	chr1	39269995	39269996	MYCBP	26292	69053	CGI	FALSE	FALSE	TRUE
cg21877201	chr1	47070058	47070059	MOB3C	148932	12503	CGI	TRUE	TRUE	FALSE
cg21906083	chr1	160772137	160772138	LY9	4063	6208	CGI	FALSE	TRUE	FALSE
cg21930399	chr1	94883754	94883755	ABCD3	5825	-177	CGI	TRUE	FALSE	FALSE
cg21936179	chr1	206786180	206786181	EIF2D	1939	-275	CGI-S-Shore	TRUE	FALSE	FALSE
cg21943599	chr1	179333589	179333590	AXDND1	126859	-1264	CGI-N-Shore	TRUE	FALSE	FALSE
cg21959334	chr1	228579038	228579039	TRIM11	81559	15477	CGI-N-Shelf	FALSE	FALSE	TRUE
cg22234529	chr1	3616498	3616499	TP73	7161	47368	CGI	FALSE	TRUE	FALSE
cg22372182	chr1	223566669	223566670	C1orf65	164127	-44	CGI-N-Shore	TRUE	FALSE	FALSE
cg22380385	chr1	1885948	1885949	TMEM52	339456	-35207	CGI-N-Shore	FALSE	TRUE	FALSE
cg22391718	chr1	110326285	110326286	EPS8L3	79574	-19640	Non-CGI	FALSE	FALSE	TRUE
cg22433862	chr1	28013341	28013342	IFI6	2537	-14616	Non-CGI	FALSE	FALSE	TRUE
cg22527425	chr1	21044753	21044754	KIF17	57576	-435	CGI	TRUE	FALSE	FALSE
cg22608265	chr1	3351106	3351107	ARHGEF16	27237	-20039	CGI	FALSE	TRUE	FALSE
cg22621686	chr1	35260256	35260257	GJA4	2701	2084	CGI	TRUE	TRUE	FALSE
cg22675207	chr1	33631052	33631053	TRIM62	55223	16617	Non-CGI	FALSE	TRUE	FALSE
cg22700015	chr1	228743131	228743132	DUSP5P1	574029	-37261	CGI	FALSE	FALSE	TRUE
cg22708961	chr1	2254245	2254246	LOC100129534	100129534	29853	CGI	FALSE	TRUE	FALSE
cg22851420	chr1	40149650	40149651	HPCAL4	51440	7437	CGI	FALSE	TRUE	FALSE
cg22857567	chr1	33116716	33116717	RBBP4	5928	-31	CGI	TRUE	FALSE	FALSE
cg23021014	chr1	24477083	24477084	IL22RA1	58985	-7307	CGI	FALSE	FALSE	TRUE
cg23022344	chr1	24969466	24969467	SRRM1	10250	-126	CGI	TRUE	FALSE	FALSE
cg23049458	chr1	62660624	62660625	L1TD1	54596	149	CGI	FALSE	TRUE	FALSE
cg23098020	chr1	153651886	153651887	NPR1	4881	721	CGI	TRUE	FALSE	FALSE
cg23163013	chr1	3606892	3606893	TP73	7161	37762	CGI-N-Shore	TRUE	TRUE	FALSE
cg23239574	chr1	228653136	228653137	MIR4666A	100616308	3360	CGI	TRUE	FALSE	FALSE
cg23244095	chr1	1476269	1476270	TMEM240	339453	-528	CGI	TRUE	FALSE	FALSE
cg23257934	chr1	234858982	234858983	LOC100506810	100506810	-805	Non-CGI	TRUE	FALSE	FALSE
cg23624671	chr1	63833285	63833286	ALG6	29929	23	CGI	TRUE	FALSE	FALSE
cg23630468	chr1	200379166	200379167	ZNF281	23528	0	CGI	TRUE	FALSE	FALSE
cg23650482	chr1	150266227	150266228	MRPS21	54460	-40	CGI	TRUE	FALSE	FALSE
cg23723105	chr1	68150193	68150194	GADD45A	1647	-665	CGI-N-Shore	TRUE	FALSE	FALSE
cg23779106	chr1	161719820	161719821	DUSP12	11266	238	CGI	TRUE	FALSE	FALSE
cg23842386	chr1	225840831	225840832	ENAH	55740	12	CGI	TRUE	FALSE	FALSE
cg23857197	chr1	224033831	224033832	TP53BP2	7159	-156	CGI	TRUE	FALSE	FALSE
cg23971170	chr1	165326269	165326270	LMX1A	4009	-316	CGI	TRUE	FALSE	FALSE
cg23981150	chr1	161111090	161111091	DEDD	9191	-8611	CGI	FALSE	FALSE	TRUE
cg23992403	chr1	226012347	226012348	EPHX1	2052	14549	Non-CGI	TRUE	TRUE	FALSE
cg24003898	chr1	36348317	36348318	2001-08-01	26523	12907	CGI-N-Shore	TRUE	TRUE	FALSE
cg24080008	chr1	38600199	38600200	MIR3659	100500801	45295	CGI	FALSE	FALSE	TRUE
cg24090393	chr1	1560804	1560805	MMP23B	8510	-6754	CGI	FALSE	TRUE	FALSE
cg24153003	chr1	151736681	151736682	MRPL9	65005	-640	CGI-S-Shore	TRUE	TRUE	FALSE
cg24155871	chr1	75139347	75139348	C1orf173	127254	73	CGI	TRUE	FALSE	FALSE
cg24162759	chr1	224622126	224622127	WDR26	80232	-124	CGI	TRUE	FALSE	FALSE
cg24304972	chr1	9663509	9663510	TMEM201	199953	14576	CGI-N-Shore	FALSE	TRUE	FALSE
cg24326661	chr1	154909296	154909297	PMVK	10654	186	CGI	TRUE	FALSE	FALSE
cg24408603	chr1	179851256	179851257	TOR1AIP1	26092	-162	CGI	TRUE	FALSE	FALSE
cg24458833	chr1	28286034	28286035	XKR8	55113	-468	CGI-S-Shore	TRUE	FALSE	FALSE
cg24466241	chr1	53308908	53308909	ZYG11A	440590	724	CGI	FALSE	TRUE	FALSE
cg24517252	chr1	249200781	249200782	PGBD2	267002	338	CGI	FALSE	TRUE	FALSE
cg24524850	chr1	44496039	44496040	SLC6A9	6536	1093	CGI	FALSE	TRUE	FALSE
cg24544320	chr1	226825435	226825436	C1orf95	375057	88933	Non-CGI	FALSE	TRUE	FALSE
cg24550298	chr1	8386089	8386090	SLC45A1	50651	1698	CGI	FALSE	TRUE	FALSE
cg24588482	chr1	160370253	160370254	VANGL2	57216	21	CGI	TRUE	TRUE	FALSE
cg24641654	chr1	1860337	1860338	TMEM52	339456	-9596	CGI-S-Shore	TRUE	FALSE	FALSE
cg24658517	chr1	221065322	221065323	HLX	3142	12578	CGI	FALSE	FALSE	TRUE
cg24680497	chr1	3343694	3343695	ARHGEF16	27237	-27451	CGI	FALSE	TRUE	FALSE
cg24695972	chr1	117113752	117113753	CD58	965	-36	CGI	TRUE	FALSE	FALSE
cg24880044	chr1	204913460	204913461	CNTN2	6900	-98603	Non-CGI	TRUE	TRUE	FALSE
cg24943329	chr1	27319836	27319837	TRNP1	388610	-357	CGI	TRUE	TRUE	FALSE
cg25001930	chr1	147801789	147801790	PPIAL4B	653505	153628	CGI	FALSE	TRUE	FALSE
cg25018801	chr1	48191031	48191032	TRABD2B	388630	271529	CGI	FALSE	FALSE	TRUE
cg25035631	chr1	35586358	35586359	ZMYM1	79830	41385	CGI-N-Shore	FALSE	FALSE	TRUE
cg25061864	chr1	247464677	247464678	ZNF496	84838	30366	CGI-S-Shore	FALSE	TRUE	FALSE
cg25066040	chr1	936229	936230	HES4	57801	-676	CGI	TRUE	FALSE	FALSE
cg25104133	chr1	178501588	178501589	C1orf220	400798	-10341	Non-CGI	FALSE	TRUE	FALSE
cg25108841	chr1	20959920	20959921	PINK1	65018	-26	CGI	TRUE	FALSE	FALSE
cg25149396	chr1	184943512	184943513	FAM129A	116496	168	CGI	TRUE	FALSE	FALSE
cg25203031	chr1	66999813	66999814	SGIP1	84251	-10	CGI-S-Shore	TRUE	FALSE	FALSE
cg25215298	chr1	860022	860023	SAMD11	148398	-506	CGI	TRUE	FALSE	FALSE
cg25340966	chr1	119532195	119532196	TBX15	6913	-15	CGI	TRUE	FALSE	FALSE
cg25370592	chr1	6454097	6454098	ACOT7	11332	-270	CGI	TRUE	FALSE	FALSE
cg25408271	chr1	91486822	91486823	ZNF644	84146	988	CGI-N-Shore	FALSE	TRUE	FALSE
cg25410842	chr1	150521647	150521648	ADAMTSL4	54507	-249	CGI	TRUE	FALSE	FALSE
cg25552937	chr1	4842472	4842473	AJAP1	55966	127366	CGI-N-Shore	FALSE	TRUE	FALSE
cg25594899	chr1	1182226	1182227	FAM132A	388581	-123	CGI	TRUE	FALSE	FALSE
cg25723050	chr1	224804222	224804223	CNIH3	149111	42	CGI	TRUE	FALSE	FALSE
cg25729922	chr1	20834612	20834613	MUL1	79594	60	CGI	TRUE	FALSE	FALSE
cg25851313	chr1	16400665	16400666	FAM131C	348487	-537	CGI-S-Shore	TRUE	FALSE	FALSE
cg25973293	chr1	1061647	1061648	C1orf159	54991	-9910	CGI	FALSE	FALSE	TRUE
cg25975165	chr1	2444426	2444427	PANK4	55229	13607	CGI	FALSE	TRUE	FALSE
cg25980388	chr1	5870397	5870398	MIR4689	100616421	52402	Non-CGI	FALSE	FALSE	TRUE
cg26218412	chr1	220921611	220921612	MARC2	54996	-63	CGI	TRUE	FALSE	FALSE
cg26220673	chr1	221064700	221064701	HLX	3142	11956	CGI	FALSE	FALSE	TRUE
cg26222311	chr1	976227	976228	AGRN	375790	20723	CGI	FALSE	TRUE	FALSE
cg26225694	chr1	180205253	180205254	LHX4	89884	5819	CGI	FALSE	TRUE	FALSE
cg26251123	chr1	145472579	145472580	ANKRD34A	284615	2070	CGI	TRUE	TRUE	FALSE
cg26252027	chr1	2012218	2012219	PRKCZ	5590	30308	CGI	FALSE	TRUE	FALSE
cg26262605	chr1	93427691	93427692	FAM69A	388650	-611	CGI	TRUE	FALSE	FALSE
cg26308425	chr1	29508658	29508659	SRSF4	6429	-20	CGI	TRUE	FALSE	FALSE
cg26336773	chr1	175014805	175014806	TNN	63923	-22187	CGI	FALSE	FALSE	TRUE
cg26433208	chr1	41445556	41445557	CTPS1	1503	548	CGI	FALSE	TRUE	FALSE
cg26562638	chr1	226130366	226130367	LEFTY2	7044	-1282	CGI-S-Shelf	TRUE	FALSE	FALSE
cg26681210	chr1	160040182	160040183	KCNJ10	3766	-130	CGI	TRUE	FALSE	FALSE
cg26783079	chr1	2434058	2434059	PANK4	55229	23975	CGI	FALSE	TRUE	FALSE
cg26831566	chr1	20693014	20693015	LOC339505	339505	62271	CGI	FALSE	TRUE	FALSE
cg26884773	chr1	235256863	235256864	SNORA14B	677802	34387	CGI	FALSE	FALSE	TRUE
cg26886056	chr1	143276895	143276896	LOC100130000	100130000	-410233	CGI	FALSE	FALSE	TRUE
cg26938364	chr1	2985527	2985528	PRDM16	63976	-213	CGI	TRUE	FALSE	FALSE
cg27012203	chr1	11865920	11865921	MTHFR	4524	238	CGI	TRUE	TRUE	FALSE
cg27332243	chr1	154842767	154842768	KCNN3	3782	-12	CGI-S-Shelf	TRUE	FALSE	FALSE
cg27399414	chr1	9884593	9884594	CLSTN1	22883	-42	CGI	TRUE	FALSE	FALSE
cg27508545	chr1	10240017	10240018	KIF1B	23095	-30745	Non-CGI	FALSE	TRUE	FALSE
cg27510182	chr1	58715553	58715554	OMA1	115209	296891	CGI	FALSE	TRUE	FALSE
cg27546066	chr1	228248599	228248600	ARF1	375	-21760	CGI	FALSE	TRUE	FALSE
cg27571196	chr1	201253259	201253260	PKP1	5317	678	CGI	FALSE	TRUE	FALSE
cg27573593	chr1	9778887	9778888	C1orf200	644997	-64242	CGI-N-Shore	FALSE	TRUE	FALSE
cg00158539	chr2	1859035	1859036	PXDN	7837	-110743	CGI	FALSE	TRUE	FALSE
cg00216693	chr2	131913247	131913248	PLEKHB2	55041	50826	CGI	FALSE	TRUE	FALSE
cg00310375	chr2	85906657	85906658	SFTPB	6439	-10792	Non-CGI	FALSE	FALSE	TRUE
cg00331740	chr2	241513689	241513690	RNPEPL1	57140	5684	CGI-S-Shore	TRUE	TRUE	FALSE
cg00609296	chr2	3461755	3461756	ADI1	55256	61593	CGI	FALSE	TRUE	FALSE
cg00765765	chr2	150176791	150176792	LYPD6	130574	-9706	CGI-N-Shore	FALSE	FALSE	TRUE
cg00860808	chr2	171670500	171670501	GAD1	2571	-2698	CGI	FALSE	FALSE	TRUE
cg00872414	chr2	23913322	23913323	ATAD2B	54454	236612	CGI-N-Shore	TRUE	TRUE	FALSE
cg01020413	chr2	66810487	66810488	MEIS1	4211	147954	CGI-S-Shore	FALSE	FALSE	TRUE
cg01077058	chr2	241083864	241083865	OTOS	150677	-3790	Non-CGI	FALSE	FALSE	TRUE
cg01206537	chr2	201171336	201171337	SPATS2L	26010	731	CGI	TRUE	TRUE	FALSE
cg01227744	chr2	20644371	20644372	RHOB	388	-2462	CGI-N-Shore	FALSE	FALSE	TRUE
cg01400712	chr2	25352206	25352207	POMC	5443	39351	CGI-N-Shelf	FALSE	TRUE	FALSE
cg01403596	chr2	92045973	92045974	GGT8P	645367	82604	CGI	FALSE	FALSE	TRUE
cg01589412	chr2	62133120	62133121	COMMD1	150684	316	CGI	FALSE	TRUE	FALSE
cg01613965	chr2	91848124	91848125	LOC654342	654342	-148	CGI	TRUE	FALSE	FALSE
cg01614598	chr2	38152364	38152365	RMDN2	151393	-96	CGI	TRUE	FALSE	FALSE
cg01660407	chr2	101008576	101008577	CHST10	9486	25552	CGI-N-Shore	FALSE	TRUE	FALSE
cg01724041	chr2	208393966	208393967	CREB1	1385	-648	CGI-N-Shore	TRUE	FALSE	FALSE
cg01725586	chr2	131513735	131513736	AMER3	205147	657	CGI	TRUE	TRUE	FALSE
cg01744130	chr2	86667850	86667851	KDM3A	55818	-419	CGI-N-Shore	TRUE	FALSE	FALSE
cg01821656	chr2	2190118	2190119	LOC730811	730811	-132884	CGI	FALSE	TRUE	FALSE
cg02089380	chr2	158732891	158732892	ACVR1	90	-516	CGI	TRUE	FALSE	FALSE
cg02093176	chr2	3660939	3660940	COLEC11	78989	18301	CGI-S-Shore	FALSE	TRUE	FALSE
cg02160608	chr2	113956634	113956635	PSD4	23550	25073	CGI	TRUE	TRUE	FALSE
cg02178630	chr2	218678534	218678535	DIRC3	729582	-57217	Non-CGI	TRUE	TRUE	FALSE
cg02324737	chr2	172543905	172543906	DYNC1I2	1781	-75	CGI	TRUE	FALSE	FALSE
cg02513202	chr2	150970076	150970077	RND3	390	374131	Non-CGI	FALSE	FALSE	TRUE
cg02763032	chr2	74425761	74425762	MTHFD2	10797	70	CGI	TRUE	FALSE	FALSE
cg02785604	chr2	131676136	131676137	ARHGEF4	50649	3349	CGI-S-Shore	FALSE	TRUE	FALSE
cg02861056	chr2	68592345	68592346	PLEK	5341	22	Non-CGI	TRUE	FALSE	FALSE
cg02929766	chr2	131100454	131100455	IMP4	92856	-33	CGI	TRUE	FALSE	FALSE
cg02938936	chr2	3718203	3718204	ALLC	55821	12416	CGI-S-Shelf	FALSE	TRUE	FALSE
cg03042666	chr2	240014781	240014782	MIR4441	100616493	-7158	CGI-N-Shore	FALSE	TRUE	FALSE
cg03075561	chr2	201936709	201936710	NDUFB3	4709	246	CGI	TRUE	FALSE	FALSE
cg03128101	chr2	74405376	74405377	MOB1A	55233	617	CGI	FALSE	TRUE	FALSE
cg03170725	chr2	27498214	27498215	SLC30A3	7781	-25	CGI-N-Shore	TRUE	FALSE	FALSE
cg03175635	chr2	203736521	203736522	ICA1L	130026	-149	CGI	TRUE	FALSE	FALSE
cg03263168	chr2	158732716	158732717	ACVR1	90	-341	CGI	TRUE	FALSE	FALSE
cg03279522	chr2	236773146	236773147	GBX2	2637	303504	CGI	FALSE	TRUE	FALSE
cg03304664	chr2	151282496	151282497	RND3	390	61711	Non-CGI	FALSE	FALSE	TRUE
cg03309786	chr2	232574968	232574969	PTMA	5757	1732	CGI	TRUE	TRUE	FALSE
cg03326215	chr2	2328391	2328392	LOC730811	730811	5386	Non-CGI	FALSE	TRUE	FALSE
cg03803336	chr2	32582034	32582035	BIRC6	57448	-60	CGI	TRUE	FALSE	FALSE
cg03817939	chr2	75788231	75788232	EVA1A	84141	8615	CGI	TRUE	TRUE	FALSE
cg03997167	chr2	2829723	2829724	MYT1L	23040	-494677	Non-CGI	FALSE	FALSE	TRUE
cg04020079	chr2	68546688	68546689	CNRIP1	25927	493	CGI	TRUE	TRUE	FALSE
cg04060001	chr2	207024261	207024262	NDUFS1	4719	-17	CGI	TRUE	FALSE	FALSE
cg04092513	chr2	200819919	200819920	C2orf47	79568	-119	CGI	TRUE	TRUE	FALSE
cg04647948	chr2	206950423	206950424	INO80D	54891	481	CGI	TRUE	TRUE	FALSE
cg04869568	chr2	602153	602154	TMEM18	129787	75284	CGI	FALSE	FALSE	TRUE
cg04881214	chr2	44395864	44395865	PPM1B	5495	-134	CGI	TRUE	FALSE	FALSE
cg04937609	chr2	23852064	23852065	KLHL29	114818	243765	CGI	FALSE	TRUE	FALSE
cg04947065	chr2	3606037	3606038	LOC100506054	100506054	60	CGI	TRUE	FALSE	FALSE
cg05059031	chr2	99061275	99061276	INPP4A	3631	-44	CGI	TRUE	FALSE	FALSE
cg05224659	chr2	43295595	43295596	ZFP36L2	678	158148	CGI	FALSE	FALSE	TRUE
cg05225012	chr2	96055346	96055347	FAHD2A	51011	-13100	CGI	FALSE	FALSE	TRUE
cg05228485	chr2	242089741	242089742	PASK	23178	-346	CGI	TRUE	TRUE	FALSE
cg05359249	chr2	220406470	220406471	TMEM198	130612	-1913	CGI	TRUE	TRUE	FALSE
cg05361673	chr2	235962928	235962929	SH3BP4	23677	102299	CGI-S-Shore	FALSE	TRUE	FALSE
cg05371711	chr2	241506007	241506008	RNPEPL1	57140	-1995	CGI	TRUE	FALSE	FALSE
cg05514256	chr2	45231891	45231892	SIX2	10736	4649	CGI	FALSE	FALSE	TRUE
cg05633391	chr2	11052558	11052559	KCNF1	3754	494	CGI	TRUE	FALSE	FALSE
cg05655534	chr2	62798448	62798449	TMEM17	200728	-35667	CGI	FALSE	FALSE	TRUE
cg05687686	chr2	180726697	180726698	ZNF385B	151126	-464	CGI	TRUE	FALSE	FALSE
cg05845831	chr2	232476255	232476256	C2orf57	165100	18679	CGI-N-Shelf	FALSE	FALSE	TRUE
cg05868531	chr2	232348602	232348603	NCL	4691	-19396	CGI	FALSE	FALSE	TRUE
cg05880944	chr2	242616965	242616966	DTYMK	1841	9416	CGI	TRUE	TRUE	FALSE
cg05903289	chr2	130345205	130345206	LOC389033	389033	346683	CGI	FALSE	FALSE	TRUE
cg06003267	chr2	583872	583873	TMEM18	129787	93565	CGI	FALSE	FALSE	TRUE
cg06094323	chr2	128145662	128145663	PROC	5624	-30332	CGI	FALSE	FALSE	TRUE
cg06119201	chr2	116152853	116152854	LOC389023	389023	-233932	Non-CGI	FALSE	TRUE	FALSE
cg06127335	chr2	242011247	242011248	MTERFD2	130916	30498	CGI	FALSE	TRUE	FALSE
cg06373804	chr2	242888333	242888334	CXXC11	285093	76446	CGI	FALSE	FALSE	TRUE
cg06478094	chr2	47630251	47630252	MSH2	4436	44	CGI	TRUE	FALSE	FALSE
cg06530490	chr2	118981783	118981784	INSIG2	51141	135732	CGI	FALSE	FALSE	TRUE
cg06554749	chr2	238384406	238384407	MLPH	79083	-10645	CGI	FALSE	FALSE	TRUE
cg06616775	chr2	202316682	202316683	STRADB	55437	289	CGI	TRUE	TRUE	FALSE
cg06638795	chr2	42719933	42719934	KCNG3	170850	1302	CGI	TRUE	TRUE	FALSE
cg06638913	chr2	235883680	235883681	SH3BP4	23677	23051	CGI	FALSE	TRUE	FALSE
cg06716968	chr2	11864461	11864462	LPIN1	23175	46739	Non-CGI	TRUE	TRUE	FALSE
cg06898946	chr2	73172128	73172129	EMX1	2016	27523	Non-CGI	FALSE	TRUE	FALSE
cg07025650	chr2	54710513	54710514	SPTBN1	6711	27058	CGI-N-Shore	FALSE	TRUE	FALSE
cg07078979	chr2	34128696	34128697	MYADML	151325	-175411	CGI	FALSE	FALSE	TRUE
cg07106432	chr2	27593462	27593463	SNX17	9784	98	CGI	TRUE	FALSE	FALSE
cg07211384	chr2	86668246	86668247	KDM3A	55818	-23	CGI	TRUE	FALSE	FALSE
cg07428089	chr2	176046170	176046171	ATP5G3	518	318	CGI	TRUE	TRUE	FALSE
cg07467448	chr2	96068411	96068412	FAHD2A	51011	-35	CGI	TRUE	FALSE	FALSE
cg07561442	chr2	24163383	24163384	UBXN2A	165324	13227	CGI	TRUE	TRUE	FALSE
cg07582400	chr2	239010679	239010680	ESPNL	339768	1727	CGI-S-Shore	FALSE	TRUE	FALSE
cg07585513	chr2	212389424	212389425	MIR548F2	100313771	901658	CGI-S-Shore	FALSE	TRUE	FALSE
cg07620889	chr2	227700566	227700567	RHBDD1	84236	-103	CGI	TRUE	FALSE	FALSE
cg07690287	chr2	185998337	185998338	ZNF804A	91752	535243	CGI-S-Shore	FALSE	FALSE	TRUE
cg07772170	chr2	220480954	220480955	SLC4A3	6508	-11336	Non-CGI	FALSE	TRUE	FALSE
cg07791671	chr2	242255336	242255337	HDLBP	3069	-220	CGI	TRUE	TRUE	FALSE
cg07867558	chr2	219524465	219524466	BCS1L	617	85	CGI	TRUE	FALSE	FALSE
cg07949777	chr2	128388876	128388877	GPR17	2840	-14561	Non-CGI	FALSE	TRUE	FALSE
cg08025512	chr2	220110385	220110386	STK16	8576	192	CGI	TRUE	TRUE	FALSE
cg08026651	chr2	84743142	84743143	DNAH6	1768	-435	CGI-N-Shore	TRUE	FALSE	FALSE
cg08045488	chr2	241076526	241076527	MYEOV2	150678	-761	CGI	TRUE	FALSE	FALSE
cg08084860	chr2	237080340	237080341	GBX2	2637	-3687	CGI	FALSE	FALSE	TRUE
cg08235500	chr2	26467844	26467845	HADHB	3032	227	CGI	TRUE	FALSE	FALSE
cg08279055	chr2	46707678	46707679	TMEM247	388946	973	CGI-N-Shore	FALSE	TRUE	FALSE
cg08690859	chr2	200333729	200333730	SATB2-AS1	150538	907	CGI	TRUE	TRUE	FALSE
cg08700893	chr2	875896	875897	LOC339822	339822	-11783	CGI	FALSE	FALSE	TRUE
cg08761102	chr2	38303844	38303845	CYP1B1	1545	-520	CGI-S-Shore	TRUE	FALSE	FALSE
cg08786481	chr2	38830091	38830092	HNRPLL	92906	85	CGI	TRUE	FALSE	FALSE
cg08800878	chr2	73152809	73152810	EMX1	2016	8204	CGI	FALSE	TRUE	FALSE
cg09001939	chr2	11810534	11810535	NTSR2	23620	-204	CGI	TRUE	FALSE	FALSE
cg09249637	chr2	11314846	11314847	PQLC3	130814	19305	Non-CGI	FALSE	TRUE	FALSE
cg09333532	chr2	61764274	61764275	XPO1	7514	1142	CGI	TRUE	TRUE	FALSE
cg09336899	chr2	233766002	233766003	C2orf82	389084	31007	CGI	FALSE	TRUE	FALSE
cg09351254	chr2	242088885	242088886	PPP1R7	5510	-137	CGI	TRUE	TRUE	FALSE
cg09426834	chr2	946648	946649	SNTG2	54221	93	CGI	TRUE	FALSE	FALSE
cg09484039	chr2	183731310	183731311	FRZB	2487	186	CGI	TRUE	FALSE	FALSE
cg09557766	chr2	239847650	239847651	FLJ43879	401039	313	Non-CGI	FALSE	TRUE	FALSE
cg09563922	chr2	121200209	121200210	LOC84931	84931	23714	CGI-S-Shore	FALSE	FALSE	TRUE
cg09717809	chr2	74375930	74375931	BOLA3-AS1	100507171	821	CGI-S-Shore	TRUE	TRUE	FALSE
cg09840623	chr2	42396402	42396403	EML4	27436	-86	CGI	TRUE	FALSE	FALSE
cg10042319	chr2	232394971	232394972	NMUR1	10316	209	CGI	FALSE	TRUE	FALSE
cg10076508	chr2	135672394	135672395	LOC100129961	100129961	3780	CGI-N-Shelf	FALSE	TRUE	FALSE
cg10159630	chr2	177037364	177037365	HOXD3	3232	8558	CGI	FALSE	TRUE	FALSE
cg10168149	chr2	200335558	200335559	SATB2	23314	429	CGI	TRUE	TRUE	FALSE
cg10258395	chr2	240026647	240026648	MIR4441	100616493	-19024	CGI-N-Shelf	FALSE	TRUE	FALSE
cg10328259	chr2	3321226	3321227	TSSC1	7260	60425	CGI	FALSE	TRUE	FALSE
cg10365657	chr2	85051143	85051144	TRABD2A	129293	57107	Non-CGI	FALSE	TRUE	FALSE
cg10523140	chr2	101768941	101768942	TBC1D8	11138	-1094	CGI-S-Shore	TRUE	FALSE	FALSE
cg10773869	chr2	70057052	70057053	GMCL1	64395	233	CGI	TRUE	FALSE	FALSE
cg10820693	chr2	237994591	237994592	COPS8	10920	506	CGI	TRUE	FALSE	FALSE
cg10908460	chr2	176950736	176950737	EVX2	344191	-2045	CGI	FALSE	FALSE	TRUE
cg10954469	chr2	71115370	71115371	VAX2	25806	-12348	CGI	FALSE	FALSE	TRUE
cg10992590	chr2	130940487	130940488	SMPD4	55627	-163	CGI-S-Shore	TRUE	TRUE	FALSE
cg10996058	chr2	119915729	119915730	C1QL2	165257	740	CGI	TRUE	FALSE	FALSE
cg11115502	chr2	24299379	24299380	SF3B14	51639	-64	CGI	TRUE	FALSE	FALSE
cg11125589	chr2	74153979	74153980	DGUOK	1716	25	CGI	TRUE	FALSE	FALSE
cg11236515	chr2	74213762	74213763	TET3	200424	-59686	CGI-S-Shore	FALSE	FALSE	TRUE
cg11284316	chr2	210636398	210636399	UNC80	285175	-317	CGI	TRUE	FALSE	FALSE
cg11284414	chr2	232573146	232573147	PTMA	5757	-87	CGI	TRUE	FALSE	FALSE
cg11310125	chr2	113239311	113239312	TTL	150465	-430	CGI	TRUE	FALSE	FALSE
cg11348442	chr2	220117784	220117785	TUBA4B	80086	-179	CGI	TRUE	TRUE	FALSE
cg11397369	chr2	231920762	231920763	PSMD1	5707	-814	CGI-N-Shore	TRUE	FALSE	FALSE
cg11418389	chr2	95978534	95978535	KCNIP3	30818	15461	CGI	FALSE	TRUE	FALSE
cg11491749	chr2	39665186	39665187	MAP4K3	8491	-966	CGI	TRUE	TRUE	FALSE
cg11565042	chr2	105858730	105858731	GPR45	11250	529	CGI	TRUE	FALSE	FALSE
cg11642891	chr2	3452563	3452564	TRAPPC12	51112	69116	CGI	FALSE	TRUE	FALSE
cg11719885	chr2	224903487	224903488	SERPINE2	5270	547	CGI	TRUE	TRUE	FALSE
cg11788289	chr2	214148976	214148977	LOC100130451	100130451	-46	CGI-N-Shore	TRUE	FALSE	FALSE
cg11794625	chr2	223521104	223521105	FARSB	10056	-276	CGI-S-Shore	TRUE	FALSE	FALSE
cg11826338	chr2	98274951	98274952	ACTR1B	10120	5608	CGI	FALSE	TRUE	FALSE
cg11838463	chr2	219081756	219081757	ARPC2	10109	-116	CGI	TRUE	FALSE	FALSE
cg11989674	chr2	175351902	175351903	GPR155	151556	-90	CGI	TRUE	FALSE	FALSE
cg12018718	chr2	8684089	8684090	ID2	3398	-138022	CGI-N-Shore	FALSE	FALSE	TRUE
cg12159419	chr2	217277556	217277557	SMARCAL1	50485	418	CGI-S-Shore	TRUE	TRUE	FALSE
cg12463851	chr2	237477186	237477187	CXCR7	57007	7761	CGI	TRUE	TRUE	FALSE
cg12518410	chr2	109745812	109745813	SH3RF3	344558	-183	CGI	TRUE	FALSE	FALSE
cg12529868	chr2	61698413	61698414	USP34	9736	-563	CGI	TRUE	FALSE	FALSE
cg12903638	chr2	210636350	210636351	UNC80	285175	-365	CGI-N-Shore	TRUE	FALSE	FALSE
cg12912690	chr2	239197457	239197458	PER2	8864	1284	CGI	TRUE	TRUE	FALSE
cg12928264	chr2	54683404	54683405	SPTBN1	6711	-48	CGI	TRUE	FALSE	FALSE
cg12943539	chr2	27851867	27851868	CCDC121	79635	29	CGI	TRUE	TRUE	FALSE
cg13008631	chr2	227663034	227663035	IRS1	3667	470	CGI	TRUE	FALSE	FALSE
cg13086402	chr2	210674064	210674065	UNC80	285175	37346	CGI	FALSE	TRUE	FALSE
cg13321077	chr2	220196755	220196756	RESP18	389075	1142	CGI	TRUE	TRUE	FALSE
cg13362112	chr2	97174246	97174247	NEURL3	93082	-399	CGI	TRUE	FALSE	FALSE
cg13388615	chr2	242878809	242878810	CXXC11	285093	66922	CGI	FALSE	FALSE	TRUE
cg13414444	chr2	239344617	239344618	ASB1	51665	8990	CGI	FALSE	TRUE	FALSE
cg13522279	chr2	144635077	144635078	GTDC1	79712	455004	Non-CGI	FALSE	FALSE	TRUE
cg13575058	chr2	198380465	198380466	MOB4	25843	169	CGI	TRUE	TRUE	FALSE
cg13699355	chr2	468179	468180	FAM150B	285016	-179870	CGI	FALSE	FALSE	TRUE
cg13703721	chr2	220363632	220363633	GMPPA	29926	44	CGI	TRUE	FALSE	FALSE
cg13836422	chr2	20189711	20189712	WDR35	57539	171	CGI	FALSE	TRUE	FALSE
cg13851334	chr2	10686975	10686976	ODC1	4953	-98521	CGI	FALSE	FALSE	TRUE
cg14161159	chr2	132481826	132481827	C2orf27A	29798	1761	CGI	FALSE	TRUE	FALSE
cg14163802	chr2	206547479	206547480	NRP2	8828	254	CGI	TRUE	FALSE	FALSE
cg14274989	chr2	119606302	119606303	EN1	2019	-542	CGI	TRUE	FALSE	FALSE
cg14383422	chr2	201450962	201450963	AOX1	316	230	CGI	FALSE	TRUE	FALSE
cg14385008	chr2	3469154	3469155	ADI1	55256	54194	CGI	FALSE	TRUE	FALSE
cg14410016	chr2	176986659	176986660	HOXD9	3235	-752	CGI	TRUE	FALSE	FALSE
cg14501281	chr2	10360265	10360266	MIR4261	100422929	-27467	CGI-N-Shore	FALSE	FALSE	TRUE
cg14661464	chr2	99953763	99953764	EIF5B	9669	-69	CGI	TRUE	TRUE	FALSE
cg14664764	chr2	128433157	128433158	LIMS2	55679	6201	CGI	TRUE	TRUE	FALSE
cg14755414	chr2	9531144	9531145	ITGB1BP1	9270	32497	CGI	FALSE	TRUE	FALSE
cg14940308	chr2	73144644	73144645	EMX1	2016	39	CGI	TRUE	FALSE	FALSE
cg14994258	chr2	1647260	1647261	PXDN	7837	101029	Non-CGI	FALSE	TRUE	FALSE
cg15099667	chr2	219134699	219134700	AAMP	14	192	CGI	TRUE	FALSE	FALSE
cg15237819	chr2	19558375	19558376	OSR1	130497	-2	CGI	TRUE	FALSE	FALSE
cg15607387	chr2	231714575	231714576	ITM2C	81618	-15044	CGI	FALSE	FALSE	TRUE
cg15612053	chr2	233899246	233899247	NEU2	4759	1863	CGI	FALSE	TRUE	FALSE
cg15742519	chr2	190627263	190627264	OSGEPL1	64172	688	CGI-N-Shore	FALSE	TRUE	FALSE
cg15754594	chr2	106184688	106184689	LOC285000	285000	42326	CGI	FALSE	FALSE	TRUE
cg15806038	chr2	3601756	3601757	RNASEH1	246243	4182	CGI-N-Shelf	FALSE	TRUE	FALSE
cg15833099	chr2	133402999	133403000	LYPD1	116372	26069	CGI	FALSE	TRUE	FALSE
cg15910994	chr2	97001734	97001735	NCAPH	23397	249	CGI	FALSE	TRUE	FALSE
cg15911409	chr2	237481080	237481081	CXCR7	57007	11655	CGI-S-Shelf	FALSE	TRUE	FALSE
cg16200531	chr2	135532566	135532567	TMEM163	81615	-7231	Non-CGI	FALSE	FALSE	TRUE
cg16205389	chr2	239079215	239079216	KLHL30	377007	31851	Non-CGI	FALSE	TRUE	FALSE
cg16227748	chr2	232186992	232186993	MIR4777	100616317	-40425	Non-CGI	FALSE	TRUE	FALSE
cg16259268	chr2	233470724	233470725	EFHD1	80303	-41	CGI	TRUE	FALSE	FALSE
cg16405026	chr2	145281942	145281943	ZEB2-AS1	100303491	-3475	CGI	FALSE	FALSE	TRUE
cg16517634	chr2	8977876	8977877	KIDINS220	57498	-120	CGI	TRUE	FALSE	FALSE
cg16640855	chr2	182543233	182543234	CERKL	375298	2146	CGI	TRUE	TRUE	FALSE
cg16781647	chr2	73151595	73151596	EMX1	2016	6990	CGI	FALSE	TRUE	FALSE
cg16832267	chr2	18060102	18060103	KCNS3	3790	987	CGI	FALSE	TRUE	FALSE
cg16926316	chr2	219256101	219256102	CTDSP1	58190	-6958	CGI	FALSE	TRUE	FALSE
cg16989378	chr2	230786828	230786829	TRIP12	9320	-172	CGI	TRUE	FALSE	FALSE
cg17148976	chr2	131594925	131594926	ARHGEF4	50649	-77859	CGI	TRUE	FALSE	FALSE
cg17177632	chr2	131512961	131512962	AMER3	205147	-114	CGI-N-Shore	TRUE	FALSE	FALSE
cg17245188	chr2	149632709	149632710	KIF5C	3800	-81	CGI	TRUE	FALSE	FALSE
cg17257554	chr2	242004824	242004825	MTERFD2	130916	36921	CGI	TRUE	TRUE	FALSE
cg17263026	chr2	121453143	121453144	GLI2	2736	-40054	CGI-N-Shore	FALSE	FALSE	TRUE
cg17418743	chr2	16689423	16689424	FAM49A	81553	157709	CGI	FALSE	FALSE	TRUE
cg17459215	chr2	66298242	66298243	MIR4778	100616464	287216	Non-CGI	FALSE	TRUE	FALSE
cg17530231	chr2	237082534	237082535	GBX2	2637	-5881	CGI	FALSE	FALSE	TRUE
cg17590938	chr2	97202435	97202436	ARID5A	10865	-27	CGI	TRUE	FALSE	FALSE
cg17669542	chr2	84743555	84743556	DNAH6	1768	-22	CGI	TRUE	FALSE	FALSE
cg17693669	chr2	8711075	8711076	ID2	3398	-111036	CGI	FALSE	FALSE	TRUE
cg17842354	chr2	214149035	214149036	SPAG16	79582	-79	CGI	TRUE	FALSE	FALSE
cg17933107	chr2	27334851	27334852	CGREF1	10669	7142	CGI	TRUE	TRUE	FALSE
cg17939889	chr2	240174650	240174651	MIR4269	100423043	-52505	CGI	FALSE	TRUE	FALSE
cg17976576	chr2	128432610	128432611	LIMS2	55679	6748	CGI	TRUE	TRUE	FALSE
cg18030798	chr2	158155471	158155472	ERMN	57471	28673	CGI	FALSE	TRUE	FALSE
cg18148375	chr2	1926535	1926536	PXDN	7837	-178243	CGI	TRUE	TRUE	FALSE
cg18206867	chr2	62422351	62422352	B3GNT2	10678	-909	CGI	TRUE	FALSE	FALSE
cg18219563	chr2	27487458	27487459	SLC30A3	7781	10728	CGI	TRUE	TRUE	FALSE
cg18279994	chr2	54950960	54950961	EML6	400954	-1187	CGI	TRUE	FALSE	FALSE
cg18310707	chr2	70121019	70121020	SNRNP27	11017	-54	CGI-N-Shore	TRUE	FALSE	FALSE
cg18334412	chr2	152955206	152955207	CACNB4	785	385	CGI	TRUE	TRUE	FALSE
cg18339598	chr2	238065252	238065253	COPS8	10920	71167	CGI	FALSE	FALSE	TRUE
cg18430156	chr2	187558795	187558796	FAM171B	165215	5	CGI	TRUE	FALSE	FALSE
cg18524934	chr2	97164073	97164074	NEURL3	93082	9771	CGI-N-Shelf	FALSE	TRUE	FALSE
cg18667659	chr2	99438903	99438904	MGAT4A	11320	-91313	CGI	FALSE	TRUE	FALSE
cg18703066	chr2	105363536	105363537	LOC284998	284998	10639	CGI	FALSE	TRUE	FALSE
cg18743464	chr2	131089942	131089943	CCDC115	84317	9978	CGI	FALSE	FALSE	TRUE
cg18762104	chr2	97535692	97535693	SEMA4C	54910	41	CGI	TRUE	FALSE	FALSE
cg18794122	chr2	1652585	1652586	PXDN	7837	95704	CGI	FALSE	TRUE	FALSE
cg18845578	chr2	240003174	240003175	MIR4441	100616493	4446	CGI	FALSE	TRUE	FALSE
cg19177701	chr2	111435858	111435859	BUB1	699	-173	CGI	TRUE	FALSE	FALSE
cg19197830	chr2	170681574	170681575	METTL5	29081	-153	CGI	TRUE	FALSE	FALSE
cg19224201	chr2	119615015	119615016	EN1	2019	-9255	CGI	FALSE	FALSE	TRUE
cg19390934	chr2	242027520	242027521	MTERFD2	130916	14225	CGI-S-Shore	FALSE	TRUE	FALSE
cg19456914	chr2	241530156	241530157	CAPN10	11132	4022	CGI	FALSE	TRUE	FALSE
cg19540797	chr2	3607301	3607302	LOC100506054	100506054	1324	CGI-S-Shore	TRUE	TRUE	FALSE
cg19906093	chr2	191045697	191045698	C2orf88	84281	43210	CGI	TRUE	TRUE	FALSE
cg19908362	chr2	240029909	240029910	MIR4441	100616493	-22286	CGI	FALSE	TRUE	FALSE
cg19910796	chr2	131449749	131449750	CYP4F30P	100132708	12125	CGI-N-Shore	TRUE	FALSE	FALSE
cg19979107	chr2	175351956	175351957	GPR155	151556	-144	CGI	TRUE	FALSE	FALSE
cg20019365	chr2	219134978	219134979	AAMP	14	-84	CGI	TRUE	FALSE	FALSE
cg20072442	chr2	80530255	80530256	LRRTM1	347730	1230	CGI	TRUE	TRUE	FALSE
cg20201270	chr2	45397874	45397875	UNQ6975	400952	84204	CGI	FALSE	FALSE	TRUE
cg20296532	chr2	120282272	120282273	SCTR	6344	-243	CGI	TRUE	FALSE	FALSE
cg20491914	chr2	26915349	26915350	KCNK3	3777	-230	CGI-N-Shore	TRUE	FALSE	FALSE
cg20495333	chr2	121107947	121107948	INHBB	3625	4227	CGI	FALSE	TRUE	FALSE
cg20558320	chr2	235210313	235210314	ARL4C	10123	195378	Non-CGI	FALSE	FALSE	TRUE
cg20679271	chr2	128350442	128350443	GPR17	2840	-52995	CGI	FALSE	TRUE	FALSE
cg20691617	chr2	85142974	85142975	TMSB10	9168	10210	CGI	FALSE	FALSE	TRUE
cg20856893	chr2	242997758	242997759	LOC728323	728323	-33084	CGI	FALSE	FALSE	TRUE
cg21083314	chr2	27994244	27994245	MRPL33	9553	-338	CGI-N-Shore	TRUE	FALSE	FALSE
cg21119375	chr2	44393385	44393386	PPM1B	5495	-2613	CGI-N-Shore	FALSE	FALSE	TRUE
cg21135616	chr2	240294246	240294247	MIR2467	100616360	-20746	CGI	FALSE	TRUE	FALSE
cg21155418	chr2	264767	264768	SH3YL1	26751	41	CGI	TRUE	TRUE	FALSE
cg21272465	chr2	239140296	239140297	LOC151174	151174	20	CGI	TRUE	FALSE	FALSE
cg21311850	chr2	210867278	210867279	RPE	6120	-72	CGI	TRUE	FALSE	FALSE
cg21463554	chr2	495912	495913	TMEM18	129787	181525	CGI	FALSE	FALSE	TRUE
cg21475150	chr2	101618248	101618249	RPL31	6160	-441	CGI-N-Shore	TRUE	FALSE	FALSE
cg21531908	chr2	109789810	109789811	MIR4265	100422863	-31765	CGI-S-Shore	FALSE	TRUE	FALSE
cg21579828	chr2	148601738	148601739	ACVR2A	92	-346	CGI	TRUE	FALSE	FALSE
cg21583565	chr2	174219336	174219337	CDCA7	83879	-223	CGI	TRUE	FALSE	FALSE
cg21594328	chr2	206830726	206830727	INO80D	54891	120178	Non-CGI	FALSE	FALSE	TRUE
cg21665164	chr2	95787889	95787890	MRPS5	64969	-134	CGI	TRUE	FALSE	FALSE
cg21674835	chr2	239039107	239039108	KLHL30	377007	-8254	CGI	FALSE	TRUE	FALSE
cg21759953	chr2	121748257	121748258	GLI2	2736	255057	CGI-S-Shore	FALSE	TRUE	FALSE
cg21821308	chr2	9533606	9533607	ITGB1BP1	9270	30035	CGI-S-Shelf	FALSE	TRUE	FALSE
cg21926875	chr2	47596410	47596411	EPCAM	4072	122	CGI	TRUE	FALSE	FALSE
cg22070462	chr2	26395155	26395156	GAREML	150946	-803	CGI	TRUE	FALSE	FALSE
cg22107710	chr2	55289198	55289199	RTN4	57142	-11463	CGI	FALSE	FALSE	TRUE
cg22190437	chr2	229045417	229045418	SPHKAP	80309	942	CGI	FALSE	TRUE	FALSE
cg22277636	chr2	218621320	218621321	DIRC3	729582	-3	CGI	TRUE	FALSE	FALSE
cg22306928	chr2	219866424	219866425	MIR375	494324	4	CGI	TRUE	FALSE	FALSE
cg22475025	chr2	43864340	43864341	PLEKHH2	130271	-97	CGI-N-Shore	TRUE	FALSE	FALSE
cg22511877	chr2	1942942	1942943	PXDN	7837	-194650	CGI-S-Shore	FALSE	TRUE	FALSE
cg22745354	chr2	928720	928721	SNTG2	54221	-17832	CGI	FALSE	FALSE	TRUE
cg22923398	chr2	132919865	132919866	MIR663B	100313824	94786	CGI	TRUE	TRUE	FALSE
cg23009452	chr2	25264872	25264873	EFR3B	22979	-99	CGI	TRUE	FALSE	FALSE
cg23040685	chr2	1093532	1093533	SNTG2	54221	146977	CGI	FALSE	TRUE	FALSE
cg23045258	chr2	228029046	228029047	COL4A4	1286	227	CGI	TRUE	FALSE	FALSE
cg23051046	chr2	223177574	223177575	PAX3	5077	-13858	CGI	FALSE	FALSE	TRUE
cg23051299	chr2	75938289	75938290	GCFC2	6936	-177	CGI	TRUE	FALSE	FALSE
cg23069877	chr2	3486221	3486222	ADI1	55256	37127	CGI-N-Shore	FALSE	TRUE	FALSE
cg23136742	chr2	26950956	26950957	KCNK3	3777	35374	CGI	FALSE	TRUE	FALSE
cg23241628	chr2	55278043	55278044	RTN4	57142	-308	CGI	TRUE	FALSE	FALSE
cg23256664	chr2	48757477	48757478	STON1	11037	168	CGI	FALSE	TRUE	FALSE
cg23325963	chr2	45160093	45160094	SIX3	6496	-8942	CGI	FALSE	FALSE	TRUE
cg23491599	chr2	155554688	155554689	KCNJ3	3760	-403	CGI	TRUE	FALSE	FALSE
cg23563438	chr2	173292207	173292208	ITGA6	3655	124	CGI	TRUE	TRUE	FALSE
cg23649088	chr2	200775458	200775459	C2orf69	205327	-519	CGI-N-Shore	TRUE	FALSE	FALSE
cg23650279	chr2	239072961	239072962	KLHL30	377007	25597	CGI	TRUE	TRUE	FALSE
cg23655816	chr2	162164767	162164768	PSMD14	10213	-17	CGI	TRUE	FALSE	FALSE
cg23811268	chr2	20189267	20189268	WDR35	57539	615	CGI-N-Shore	FALSE	TRUE	FALSE
cg23897319	chr2	241366765	241366766	GPC1	2817	-8348	Non-CGI	FALSE	FALSE	TRUE
cg23927687	chr2	233766118	233766119	C2orf82	389084	31123	CGI	TRUE	TRUE	FALSE
cg23977011	chr2	220437318	220437319	INHA	3623	363	CGI-S-Shore	TRUE	FALSE	FALSE
cg23993463	chr2	234847856	234847857	TRPM8	79054	21812	CGI	FALSE	TRUE	FALSE
cg24071726	chr2	171571151	171571152	LOC440925	440925	-73	CGI	TRUE	FALSE	FALSE
cg24194413	chr2	192746039	192746040	SDPR	8436	-34032	CGI-N-Shore	FALSE	FALSE	TRUE
cg24215279	chr2	1518383	1518384	TPO	7173	140387	CGI-S-Shelf	FALSE	TRUE	FALSE
cg24229662	chr2	121499644	121499645	GLI2	2736	6444	CGI	FALSE	TRUE	FALSE
cg24231380	chr2	242813914	242813915	CXXC11	285093	2027	CGI	FALSE	TRUE	FALSE
cg24419828	chr2	201171294	201171295	SPATS2L	26010	689	CGI	TRUE	TRUE	FALSE
cg24478803	chr2	26786046	26786047	C2orf70	339778	564	CGI	FALSE	TRUE	FALSE
cg24519533	chr2	135226787	135226788	MGAT5	4249	214956	CGI	FALSE	TRUE	FALSE
cg24551396	chr2	242895660	242895661	CXXC11	285093	83773	CGI	FALSE	FALSE	TRUE
cg24575676	chr2	180726035	180726036	ZNF385B	151126	195	CGI	TRUE	FALSE	FALSE
cg24586870	chr2	233198590	233198591	ALPP	250	-44756	CGI-N-Shore	FALSE	TRUE	FALSE
cg24631450	chr2	234262952	234262953	DGKD	8527	-199	CGI-S-Shore	TRUE	FALSE	FALSE
cg24678040	chr2	242659424	242659425	D2HGDH	728294	-14604	CGI-N-Shore	FALSE	TRUE	FALSE
cg24681695	chr2	170550946	170550947	CCDC173	129881	-14	CGI	TRUE	FALSE	FALSE
cg24767315	chr2	241525811	241525812	CAPN10	11132	-320	CGI	TRUE	FALSE	FALSE
cg24769499	chr2	120189242	120189243	TMEM37	140738	-202	CGI	TRUE	FALSE	FALSE
cg24885082	chr2	11051973	11051974	KCNF1	3754	-88	CGI	TRUE	FALSE	FALSE
cg24923516	chr2	127955156	127955157	CYP27C1	339761	22496	Non-CGI	FALSE	TRUE	FALSE
cg24980657	chr2	150177277	150177278	LYPD6	130574	-9220	CGI	FALSE	FALSE	TRUE
cg24996605	chr2	128381653	128381654	GPR17	2840	-21784	CGI	FALSE	TRUE	FALSE
cg25240445	chr2	37458543	37458544	CEBPZ	10153	195	CGI	TRUE	TRUE	FALSE
cg25471520	chr2	166813804	166813805	TTC21B	79809	-3455	CGI	FALSE	FALSE	TRUE
cg25534953	chr2	97174206	97174207	NEURL3	93082	-359	CGI	TRUE	FALSE	FALSE
cg25567448	chr2	97175065	97175066	NEURL3	93082	-1218	CGI	TRUE	FALSE	FALSE
cg25590579	chr2	45838450	45838451	SRBD1	55133	-16	CGI	TRUE	FALSE	FALSE
cg25618271	chr2	119532118	119532119	EN1	2019	73639	CGI	FALSE	FALSE	TRUE
cg25656144	chr2	28614171	28614172	FOSL2	2355	-1496	CGI	TRUE	TRUE	FALSE
cg25804718	chr2	69870025	69870026	AAK1	22848	950	CGI-N-Shore	TRUE	TRUE	FALSE
cg25815054	chr2	165697978	165697979	COBLL1	22837	698	CGI	TRUE	TRUE	FALSE
cg25942789	chr2	241696788	241696789	KIF1A	547	62935	CGI	FALSE	TRUE	FALSE
cg25976672	chr2	235907796	235907797	SH3BP4	23677	47167	CGI	FALSE	TRUE	FALSE
cg26009192	chr2	120282200	120282201	SCTR	6344	-171	CGI	TRUE	FALSE	FALSE
cg26036375	chr2	122660039	122660040	TSN	7247	146917	Non-CGI	FALSE	FALSE	TRUE
cg26056277	chr2	166982925	166982926	SCN1A	6323	22715	Non-CGI	FALSE	TRUE	FALSE
cg26127425	chr2	238382343	238382344	MLPH	79083	-12708	CGI-N-Shore	FALSE	FALSE	TRUE
cg26154534	chr2	241076355	241076356	MYEOV2	150678	-590	CGI	TRUE	FALSE	FALSE
cg26267388	chr2	119591627	119591628	EN1	2019	14130	CGI	FALSE	FALSE	TRUE
cg26302994	chr2	44395983	44395984	PPM1B	5495	-15	CGI	TRUE	FALSE	FALSE
cg26378982	chr2	11053937	11053938	KCNF1	3754	1873	CGI	TRUE	FALSE	FALSE
cg26500773	chr2	232646331	232646332	COPS7B	64708	-112	CGI	TRUE	FALSE	FALSE
cg26638005	chr2	131090049	131090050	CCDC115	84317	9871	CGI	FALSE	FALSE	TRUE
cg26703456	chr2	226264821	226264822	NYAP2	57624	-779	Non-CGI	TRUE	FALSE	FALSE
cg26797073	chr2	131129811	131129812	PTPN18	26469	16230	CGI	TRUE	TRUE	FALSE
cg26855801	chr2	45176983	45176984	SIX3	6496	7945	CGI	FALSE	FALSE	TRUE
cg27139836	chr2	219868065	219868066	MIR375	494324	-1634	CGI	TRUE	TRUE	FALSE
cg27166649	chr2	182521528	182521529	CERKL	375298	23851	CGI	TRUE	TRUE	FALSE
cg27169860	chr2	66218712	66218713	MIR4778	100616464	366746	Non-CGI	FALSE	TRUE	FALSE
cg27242549	chr2	113012627	113012628	ZC3H8	84524	35	CGI	TRUE	FALSE	FALSE
cg27291468	chr2	9878816	9878817	TAF1B	9014	-104753	Non-CGI	FALSE	FALSE	TRUE
cg00089486	chr3	157816330	157816331	SHOX2	6474	7620	CGI-S-Shore	FALSE	TRUE	FALSE
cg00099023	chr3	52189007	52189008	POC1A	25886	-300	CGI	TRUE	FALSE	FALSE
cg00186462	chr3	100401284	100401285	TFG	10342	-26848	CGI	FALSE	TRUE	FALSE
cg00656387	chr3	40428638	40428639	ENTPD3	956	-33	CGI-N-Shore	TRUE	FALSE	FALSE
cg00744083	chr3	38648200	38648201	SCN5A	6331	42962	Non-CGI	TRUE	TRUE	FALSE
cg00891242	chr3	157828165	157828166	RSRC1	51319	272	CGI	FALSE	TRUE	FALSE
cg00906762	chr3	148805118	148805119	HLTF	6596	-776	CGI	TRUE	FALSE	FALSE
cg00987743	chr3	49581113	49581114	BSN-AS2	100132677	10684	CGI-S-Shelf	FALSE	FALSE	TRUE
cg01005211	chr3	72338583	72338584	LOC201617	201617	138174	Non-CGI	FALSE	FALSE	TRUE
cg01106145	chr3	43663861	43663862	ANO10	55129	-300	CGI	TRUE	FALSE	FALSE
cg01139553	chr3	193493033	193493034	OPA1	4976	182099	CGI-S-Shelf	FALSE	FALSE	TRUE
cg01336855	chr3	64673923	64673924	ADAMTS9	56999	-557	CGI	TRUE	TRUE	FALSE
cg01353464	chr3	38180116	38180117	MYD88	4615	146	CGI	TRUE	FALSE	FALSE
cg01376826	chr3	147129826	147129827	ZIC1	7545	2644	CGI	FALSE	TRUE	FALSE
cg01894743	chr3	133614786	133614787	RAB6B	51560	-94	CGI	TRUE	FALSE	FALSE
cg01951420	chr3	121553821	121553822	IQCB1	9657	103	CGI	TRUE	FALSE	FALSE
cg02053257	chr3	10353648	10353649	SEC13	6396	9208	Non-CGI	FALSE	TRUE	FALSE
cg02056280	chr3	178866391	178866392	PIK3CA	5290	79	CGI	TRUE	TRUE	FALSE
cg02062140	chr3	169781664	169781665	GPR160	26996	25928	CGI	FALSE	TRUE	FALSE
cg02253760	chr3	147077616	147077617	ZIC4	84107	46978	CGI-S-Shore	FALSE	FALSE	TRUE
cg02389617	chr3	186501375	186501376	EIF4A2	1974	13	CGI	TRUE	FALSE	FALSE
cg02504211	chr3	194815434	194815435	XXYLT1	152002	176459	CGI	FALSE	TRUE	FALSE
cg02627110	chr3	47823531	47823532	SMARCC1	6599	63	CGI	TRUE	FALSE	FALSE
cg02700891	chr3	129693586	129693587	TRH	7200	471	CGI	TRUE	FALSE	FALSE
cg02738081	chr3	184971844	184971845	EHHADH	1962	40	CGI	TRUE	FALSE	FALSE
cg02738677	chr3	133265129	133265130	CDV3	55573	-27303	Non-CGI	FALSE	FALSE	TRUE
cg02771240	chr3	193789377	193789378	HES1	3280	-64552	CGI-S-Shore	FALSE	FALSE	TRUE
cg02806645	chr3	138725153	138725154	PRR23A	729627	-42	CGI	TRUE	FALSE	FALSE
cg02858214	chr3	182400605	182400606	ATP11B	23200	-110684	CGI	FALSE	FALSE	TRUE
cg02930239	chr3	138763670	138763671	PRR23C	389152	62	CGI	TRUE	FALSE	FALSE
cg03385233	chr3	122785932	122785933	PDIA5	10954	75	CGI	TRUE	FALSE	FALSE
cg03550219	chr3	25705846	25705847	MIR4442	100616477	582	CGI	TRUE	TRUE	FALSE
cg03668835	chr3	17784171	17784172	TBC1D5	9779	67	CGI	TRUE	FALSE	FALSE
cg03670164	chr3	178789707	178789708	ZMAT3	64393	-50	CGI	TRUE	FALSE	FALSE
cg03802069	chr3	137482593	137482594	SOX14	8403	-539	CGI	TRUE	FALSE	FALSE
cg03981074	chr3	183959062	183959063	MIR1224	100187716	-129	CGI-N-Shore	TRUE	TRUE	FALSE
cg03994820	chr3	350682	350683	CHL1	10752	112402	CGI	FALSE	TRUE	FALSE
cg04066019	chr3	16554466	16554467	RFTN1	23180	754	CGI	FALSE	TRUE	FALSE
cg04072910	chr3	129290078	129290079	H1FOO	132243	28020	CGI-S-Shore	FALSE	TRUE	FALSE
cg04231050	chr3	133191297	133191298	BFSP2	8419	72506	CGI	FALSE	TRUE	FALSE
cg04412755	chr3	46939978	46939979	PTH1R	5745	20741	CGI	FALSE	TRUE	FALSE
cg04419871	chr3	197409435	197409436	MIR922	100126321	-7987	CGI	FALSE	TRUE	FALSE
cg04468081	chr3	182983386	182983387	B3GNT5	84002	12353	Non-CGI	FALSE	TRUE	FALSE
cg04527018	chr3	126261298	126261299	C3orf22	152065	16458	CGI	FALSE	TRUE	FALSE
cg04537229	chr3	186545622	186545623	ADIPOQ	9370	-14839	CGI-S-Shore	FALSE	FALSE	TRUE
cg04602284	chr3	119422283	119422284	MAATS1	89876	413	CGI	FALSE	TRUE	FALSE
cg04614380	chr3	50192449	50192450	SEMA3F	6405	-397	CGI	TRUE	TRUE	FALSE
cg04741853	chr3	44037189	44037190	MIR138-1	406929	-118513	CGI	FALSE	FALSE	TRUE
cg04791456	chr3	57505743	57505744	DNAH12	201625	24326	CGI	FALSE	TRUE	FALSE
cg04808658	chr3	52470040	52470041	SEMA3G	56920	9001	Non-CGI	FALSE	TRUE	FALSE
cg04888849	chr3	9970020	9970021	CRELD1	78987	-5502	Non-CGI	TRUE	TRUE	FALSE
cg04949981	chr3	46796026	46796027	PRSS46	100287362	-18104	CGI-S-Shelf	TRUE	TRUE	FALSE
cg05147070	chr3	160283469	160283470	KPNA4	3840	-92	CGI	TRUE	FALSE	FALSE
cg05385623	chr3	57994101	57994102	FLNB	2317	-24	CGI	TRUE	FALSE	FALSE
cg05452836	chr3	146262174	146262175	PLSCR1	5359	452	CGI	FALSE	TRUE	FALSE
cg05467012	chr3	12595696	12595697	MKRN2	23609	-2896	CGI	FALSE	FALSE	TRUE
cg05677579	chr3	51976245	51976246	PARP3	10039	-114	CGI	TRUE	FALSE	FALSE
cg05983061	chr3	39544192	39544193	MOBP	4336	35121	CGI	FALSE	TRUE	FALSE
cg06150369	chr3	129118661	129118662	RPL32P3	132241	-378	CGI	TRUE	FALSE	FALSE
cg06508320	chr3	179660149	179660150	PEX5L	51555	94366	CGI-N-Shore	FALSE	TRUE	FALSE
cg06651450	chr3	32860909	32860910	TRIM71	131405	1398	CGI	FALSE	TRUE	FALSE
cg06698795	chr3	126260615	126260616	C3orf22	152065	17141	CGI	FALSE	TRUE	FALSE
cg07079407	chr3	122233852	122233853	KPNA1	3836	-65	CGI	TRUE	FALSE	FALSE
cg07248043	chr3	125314337	125314338	OSBPL11	114885	42	CGI	TRUE	FALSE	FALSE
cg07448319	chr3	40547217	40547218	ZNF620	253639	-311	CGI-N-Shore	TRUE	FALSE	FALSE
cg07580707	chr3	14220061	14220062	XPC	7508	109	CGI	TRUE	FALSE	FALSE
cg07638884	chr3	77088763	77088764	ROBO2	6092	1102117	CGI	TRUE	TRUE	FALSE
cg07696485	chr3	36986642	36986643	TRANK1	9881	-93	CGI	TRUE	FALSE	FALSE
cg07851808	chr3	14988835	14988836	NR2C2	7182	-399	CGI	TRUE	TRUE	FALSE
cg08049060	chr3	50396974	50396975	TMEM115	11070	-34	CGI	TRUE	FALSE	FALSE
cg08154107	chr3	183994073	183994074	CAMK2N2	94032	-14821	CGI	TRUE	TRUE	FALSE
cg08162476	chr3	13064001	13064002	IQSEC1	9922	50614	Non-CGI	FALSE	TRUE	FALSE
cg08216768	chr3	127175552	127175553	TPRA1	131601	134014	CGI	FALSE	FALSE	TRUE
cg08519233	chr3	105085521	105085522	ALCAM	214	-34	CGI	TRUE	FALSE	FALSE
cg08828664	chr3	149688512	149688513	PFN2	5217	227	CGI	TRUE	FALSE	FALSE
cg08887694	chr3	53880378	53880379	CHDH	55349	40	CGI	TRUE	FALSE	FALSE
cg09000779	chr3	136867925	136867926	IL20RB	53833	191217	Non-CGI	FALSE	FALSE	TRUE
cg09024340	chr3	55520476	55520477	WNT5A	7474	853	CGI	FALSE	TRUE	FALSE
cg09342567	chr3	178979013	178979014	KCNMB3	27094	5823	CGI	TRUE	TRUE	FALSE
cg09475741	chr3	42577716	42577717	VIPR1	7433	46924	CGI	FALSE	TRUE	FALSE
cg09677287	chr3	42815903	42815904	CCDC13	152206	-1157	CGI-S-Shore	TRUE	FALSE	FALSE
cg09710790	chr3	4534905	4534906	ITPR1	3708	-125	CGI	TRUE	FALSE	FALSE
cg10176160	chr3	184279528	184279529	EPHB3	2049	-57	CGI	TRUE	FALSE	FALSE
cg10460643	chr3	53205536	53205537	PRKCD	5580	10312	Non-CGI	FALSE	TRUE	FALSE
cg10604373	chr3	194004692	194004693	LOC100131551	100131551	25899	Non-CGI	FALSE	FALSE	TRUE
cg10747115	chr3	124931627	124931628	SLC12A8	84561	66462	CGI	TRUE	TRUE	FALSE
cg10748086	chr3	13009316	13009317	IQSEC1	9922	105299	CGI	TRUE	TRUE	FALSE
cg11118681	chr3	39149366	39149367	TTC21A	199223	213	CGI	TRUE	TRUE	FALSE
cg11166759	chr3	24870785	24870786	MIR4792	100616448	-307858	CGI	FALSE	FALSE	TRUE
cg11235602	chr3	39543776	39543777	MOBP	4336	34705	CGI	FALSE	TRUE	FALSE
cg11325267	chr3	137480853	137480854	SOX14	8403	-2279	CGI	FALSE	FALSE	TRUE
cg11381843	chr3	142681401	142681402	PAQR9	344838	775	CGI	TRUE	FALSE	FALSE
cg11615607	chr3	120004483	120004484	GPR156	165829	-41157	CGI-S-Shore	FALSE	FALSE	TRUE
cg11733272	chr3	46940439	46940440	PTH1R	5745	21202	CGI	FALSE	TRUE	FALSE
cg11733675	chr3	173115689	173115690	NLGN1	22871	-553	CGI	TRUE	FALSE	FALSE
cg11830761	chr3	126007485	126007486	KLF15	28999	68749	CGI	FALSE	FALSE	TRUE
cg11929643	chr3	48700391	48700392	CELSR3	1951	9588	CGI	TRUE	TRUE	FALSE
cg12019990	chr3	9032274	9032275	RAD18	56852	-27114	CGI-N-Shore	FALSE	TRUE	FALSE
cg12118013	chr3	134031948	134031949	AMOTL2	51421	62309	CGI	FALSE	FALSE	TRUE
cg12233334	chr3	49056086	49056087	MIR425	494337	1579	CGI	TRUE	TRUE	FALSE
cg12298268	chr3	139257866	139257867	RBP1	5947	803	CGI	FALSE	TRUE	FALSE
cg12333618	chr3	172859037	172859038	SPATA16	83893	19	Non-CGI	TRUE	FALSE	FALSE
cg12335473	chr3	15140786	15140787	ZFYVE20	64145	-130	CGI	TRUE	FALSE	FALSE
cg12359592	chr3	138048777	138048778	NME9	347736	-48	CGI	TRUE	FALSE	FALSE
cg12377709	chr3	139108535	139108536	COPB2	9276	-12	CGI	TRUE	FALSE	FALSE
cg12423338	chr3	99944194	99944195	TBC1D23	55773	-35490	CGI	FALSE	FALSE	TRUE
cg12616683	chr3	127323572	127323573	MCM2	4171	6318	CGI	TRUE	TRUE	FALSE
cg12624667	chr3	36986555	36986556	TRANK1	9881	-6	CGI	TRUE	FALSE	FALSE
cg12662555	chr3	57742520	57742521	SLMAP	7871	-652	CGI	TRUE	FALSE	FALSE
cg12668309	chr3	53529387	53529388	CACNA1D	776	355	CGI	FALSE	TRUE	FALSE
cg12702506	chr3	195938201	195938202	ZDHHC19	131540	97	CGI-S-Shelf	TRUE	FALSE	FALSE
cg12702981	chr3	119528656	119528657	NR1I2	8856	29324	CGI-S-Shore	TRUE	TRUE	FALSE
cg12739914	chr3	195552429	195552430	MUC4	4585	-13584	CGI	FALSE	FALSE	TRUE
cg12798564	chr3	75263641	75263642	FAM86DP	692099	220623	CGI-N-Shore	FALSE	FALSE	TRUE
cg13047869	chr3	10149882	10149883	FANCD2OS	115795	31	CGI	TRUE	FALSE	FALSE
cg13056927	chr3	42727915	42727916	KLHL40	131377	903	CGI	TRUE	FALSE	FALSE
cg13141009	chr3	179660224	179660225	PEX5L	51555	94291	CGI	FALSE	TRUE	FALSE
cg13327336	chr3	50403312	50403313	TMEM115	11070	-6372	CGI-S-Shore	FALSE	TRUE	FALSE
cg13341668	chr3	50359909	50359910	HYAL2	8692	370	CGI	TRUE	TRUE	FALSE
cg13352455	chr3	53230110	53230111	PRKCD	5580	34886	CGI	FALSE	FALSE	TRUE
cg13431226	chr3	139062594	139062595	MRPS22	56945	-202	CGI-N-Shore	TRUE	FALSE	FALSE
cg13514996	chr3	113829347	113829348	QTRTD1	79691	53735	Non-CGI	FALSE	FALSE	TRUE
cg13575638	chr3	9440081	9440082	SETD5	55209	677	CGI	TRUE	TRUE	FALSE
cg13577493	chr3	50541078	50541079	CACNA2D2	9254	-185	CGI	TRUE	FALSE	FALSE
cg13581422	chr3	130236522	130236523	COL6A6	131873	-42654	CGI	FALSE	FALSE	TRUE
cg13878677	chr3	13060915	13060916	IQSEC1	9922	53700	Non-CGI	FALSE	TRUE	FALSE
cg14019951	chr3	174095086	174095087	NAALADL2	254827	-482023	CGI	FALSE	FALSE	TRUE
cg14044874	chr3	14545362	14545363	GRIP2	80852	38224	Non-CGI	FALSE	TRUE	FALSE
cg14098532	chr3	111717874	111717875	TAGLN3	29114	287	CGI-N-Shore	TRUE	FALSE	FALSE
cg14224441	chr3	11743273	11743274	VGLL4	9686	18945	CGI-N-Shelf	FALSE	TRUE	FALSE
cg14310703	chr3	126006903	126006904	KLF15	28999	69331	CGI	FALSE	FALSE	TRUE
cg14473344	chr3	142840240	142840241	CHST2	9435	1621	CGI	TRUE	TRUE	FALSE
cg14522847	chr3	15919537	15919538	MIR563	693148	4258	CGI	TRUE	FALSE	FALSE
cg14557185	chr3	149374763	149374764	WWTR1-AS1	100128025	-1232	CGI	TRUE	TRUE	FALSE
cg14560001	chr3	44038250	44038251	MIR138-1	406929	-117452	CGI	FALSE	FALSE	TRUE
cg14567877	chr3	123071300	123071301	ADCY5	111	96090	Non-CGI	TRUE	TRUE	FALSE
cg14779951	chr3	129147541	129147542	EFCAB12	90288	-46	CGI	TRUE	FALSE	FALSE
cg14919823	chr3	14166510	14166511	TMEM43	79188	69	CGI	TRUE	FALSE	FALSE
cg15029402	chr3	184349370	184349371	EPHB3	2049	69782	CGI	FALSE	FALSE	TRUE
cg15037661	chr3	23986935	23986936	NR1D2	9975	183	CGI	TRUE	TRUE	FALSE
cg15105326	chr3	147108916	147108917	ZIC4	84107	15678	CGI	FALSE	TRUE	FALSE
cg15106134	chr3	181428466	181428467	SOX2	6657	-1244	CGI	TRUE	TRUE	FALSE
cg15265785	chr3	156877897	156877898	CCNL1	57018	583	CGI	TRUE	FALSE	FALSE
cg15347189	chr3	187387999	187388000	SST	6750	200	CGI	TRUE	FALSE	FALSE
cg15904821	chr3	141206028	141206029	RASA2	5922	101	CGI	TRUE	FALSE	FALSE
cg15924583	chr3	47045470	47045471	NRADDP	100129354	-7560	CGI-N-Shore	FALSE	TRUE	FALSE
cg15992420	chr3	194118166	194118167	GP5	2814	1827	CGI	TRUE	TRUE	FALSE
cg16014122	chr3	48506326	48506327	TREX1	11277	5139	Non-CGI	TRUE	TRUE	FALSE
cg16016176	chr3	119298513	119298514	ADPRH	141	-8	CGI	TRUE	FALSE	FALSE
cg16182936	chr3	13060741	13060742	IQSEC1	9922	53874	Non-CGI	FALSE	TRUE	FALSE
cg16207084	chr3	56588801	56588802	CCDC66	285331	-2381	CGI-N-Shelf	FALSE	FALSE	TRUE
cg16240162	chr3	147106890	147106891	ZIC4	84107	17704	CGI-S-Shore	FALSE	TRUE	FALSE
cg16240572	chr3	134204857	134204858	ANAPC13	25847	6	CGI	TRUE	FALSE	FALSE
cg16436210	chr3	16705740	16705741	DAZL	1618	-58733	Non-CGI	FALSE	FALSE	TRUE
cg16441144	chr3	130533733	130533734	ATP2C1	27032	-35634	CGI	FALSE	FALSE	TRUE
cg16450309	chr3	170626822	170626823	EIF5A2	56648	-395	CGI	TRUE	FALSE	FALSE
cg16468914	chr3	50242735	50242736	SLC38A3	10991	42	CGI	TRUE	FALSE	FALSE
cg16586182	chr3	47516702	47516703	SCAP	22937	741	CGI	FALSE	TRUE	FALSE
cg16589135	chr3	44063404	44063405	MIR138-1	406929	-92298	CGI	FALSE	FALSE	TRUE
cg16705744	chr3	27756039	27756040	EOMES	8320	8165	CGI	FALSE	FALSE	TRUE
cg17053415	chr3	47021126	47021127	NBEAL2	23218	-45	CGI	TRUE	FALSE	FALSE
cg17182512	chr3	27754137	27754138	EOMES	8320	10067	CGI	FALSE	FALSE	TRUE
cg17295957	chr3	127006803	127006804	PLXNA1	5361	299365	CGI	FALSE	FALSE	TRUE
cg17309592	chr3	49591741	49591742	BSN-AS2	100132677	56	CGI	TRUE	FALSE	FALSE
cg17482114	chr3	123103936	123103937	ADCY5	111	63454	Non-CGI	FALSE	TRUE	FALSE
cg17527142	chr3	49027225	49027226	P4HTM	54681	-114	CGI	TRUE	FALSE	FALSE
cg17822007	chr3	155463780	155463781	PLCH1	23007	-41782	CGI	FALSE	FALSE	TRUE
cg17876742	chr3	26388044	26388045	LRRC3B	116135	-276254	Non-CGI	FALSE	FALSE	TRUE
cg18140433	chr3	190580898	190580899	GMNC	647309	-432	CGI	TRUE	FALSE	FALSE
cg18172135	chr3	185912486	185912487	ETV5	2119	-85584	CGI-S-Shore	FALSE	TRUE	FALSE
cg18252903	chr3	147072643	147072644	ZIC4	84107	51951	CGI	FALSE	FALSE	TRUE
cg18337222	chr3	99595254	99595255	CMSS1	84319	58575	CGI	TRUE	TRUE	FALSE
cg18514406	chr3	48885405	48885406	PRKAR2A	5576	-134	CGI	TRUE	FALSE	FALSE
cg18639129	chr3	194817200	194817201	XXYLT1	152002	174693	CGI-S-Shore	FALSE	TRUE	FALSE
cg18772127	chr3	32443496	32443497	CMTM7	112616	10332	CGI-S-Shore	FALSE	TRUE	FALSE
cg19155557	chr3	41240643	41240644	CTNNB1	1499	4241	CGI	TRUE	TRUE	FALSE
cg19188060	chr3	184017239	184017240	PSMD2	5708	216	CGI	TRUE	TRUE	FALSE
cg19219068	chr3	48617067	48617068	MIR711	100313843	-656	Non-CGI	TRUE	TRUE	FALSE
cg19393219	chr3	139048338	139048339	MRPS22	56945	-14458	Non-CGI	FALSE	FALSE	TRUE
cg19436429	chr3	178978985	178978986	KCNMB3	27094	5851	CGI	TRUE	TRUE	FALSE
cg19459834	chr3	154042278	154042279	DHX36	170506	6	CGI	TRUE	FALSE	FALSE
cg19600115	chr3	26666855	26666856	LRRC3B	116135	2554	CGI-S-Shore	TRUE	TRUE	FALSE
cg19628164	chr3	143689916	143689917	C3orf58	205428	-722	CGI	TRUE	FALSE	FALSE
cg19827650	chr3	42744301	42744302	HHATL	57467	16	Non-CGI	TRUE	FALSE	FALSE
cg20038252	chr3	126854933	126854934	PLXNA1	5361	147495	CGI-S-Shore	FALSE	FALSE	TRUE
cg20137461	chr3	169782135	169782136	GPR160	26996	26399	CGI	FALSE	TRUE	FALSE
cg20280415	chr3	48644361	48644362	UQCRC1	7384	2735	CGI-N-Shelf	FALSE	TRUE	FALSE
cg20717205	chr3	44690179	44690180	ZNF35	7584	-52	CGI-N-Shore	TRUE	FALSE	FALSE
cg20920097	chr3	127057149	127057150	TPRA1	131601	252417	CGI	FALSE	TRUE	FALSE
cg20977992	chr3	13461859	13461860	NUP210	23225	-49	CGI	TRUE	FALSE	FALSE
cg20985755	chr3	24536474	24536475	THRB	7068	-20	CGI	TRUE	FALSE	FALSE
cg21093807	chr3	56717625	56717626	FAM208A	23272	-489	CGI	TRUE	FALSE	FALSE
cg21394171	chr3	122755851	122755852	SEMA5B	54437	-8398	Non-CGI	FALSE	FALSE	TRUE
cg21453451	chr3	181414237	181414238	SOX2	6657	-15473	CGI	FALSE	TRUE	FALSE
cg21487550	chr3	127056955	127056956	TPRA1	131601	252611	CGI	FALSE	TRUE	FALSE
cg21662156	chr3	196753119	196753120	MFI2	4241	3566	CGI-S-Shore	FALSE	TRUE	FALSE
cg21751983	chr3	73674433	73674434	PDZRN3	23024	-360	CGI	TRUE	FALSE	FALSE
cg21766308	chr3	151178904	151178905	IGSF10	285313	-2406	CGI	FALSE	FALSE	TRUE
cg21852757	chr3	179424616	179424617	USP13	8975	53682	Non-CGI	FALSE	TRUE	FALSE
cg22157823	chr3	47517263	47517264	SCAP	22937	180	CGI	FALSE	TRUE	FALSE
cg22498996	chr3	148415624	148415625	AGTR1	185	-32	CGI	TRUE	FALSE	FALSE
cg22814764	chr3	126911953	126911954	PLXNA1	5361	204515	CGI	TRUE	FALSE	FALSE
cg22984571	chr3	186490656	186490657	EIF4A2	1974	-10703	CGI	FALSE	FALSE	TRUE
cg23087992	chr3	181430208	181430209	SOX2	6657	495	CGI	TRUE	TRUE	FALSE
cg23162967	chr3	105587981	105587982	CBLB	868	283	CGI	TRUE	TRUE	FALSE
cg23198707	chr3	112023284	112023285	SLC9C1	285335	-10209	Non-CGI	FALSE	TRUE	FALSE
cg23434122	chr3	40518435	40518436	ZNF619	285267	-167	CGI-N-Shore	TRUE	FALSE	FALSE
cg23509745	chr3	184045221	184045222	SNORD66	692107	1736	CGI-S-Shore	FALSE	TRUE	FALSE
cg23514324	chr3	12329213	12329214	PPARG	5468	-134	CGI	TRUE	FALSE	FALSE
cg23660805	chr3	53195174	53195175	PRKCD	5580	-47	CGI	TRUE	FALSE	FALSE
cg24100506	chr3	44903551	44903552	TMEM42	131616	142	CGI	TRUE	FALSE	FALSE
cg24199400	chr3	113160430	113160431	WDR52	55779	-68	CGI	TRUE	FALSE	FALSE
cg24371438	chr3	183967690	183967691	ECE2	9718	244	CGI	TRUE	TRUE	FALSE
cg24391471	chr3	44974926	44974927	EXOSC7	23016	-41822	Non-CGI	FALSE	TRUE	FALSE
cg24398023	chr3	49449349	49449350	RHOA	387	175	CGI	TRUE	FALSE	FALSE
cg24576945	chr3	42743203	42743204	HHATL	57467	1114	Non-CGI	TRUE	TRUE	FALSE
cg24620761	chr3	147123199	147123200	ZIC4	84107	1395	CGI-N-Shore	TRUE	TRUE	FALSE
cg24632247	chr3	35680890	35680891	ARPP21	10777	-189	CGI	TRUE	FALSE	FALSE
cg24768999	chr3	127394912	127394913	ABTB1	80325	3130	CGI-S-Shelf	TRUE	TRUE	FALSE
cg24827726	chr3	14581937	14581938	GRIP2	80852	1649	Non-CGI	TRUE	TRUE	FALSE
cg24896299	chr3	123303721	123303722	PTPLB	201562	201	CGI	TRUE	FALSE	FALSE
cg24919342	chr3	127399204	127399205	ABTB1	80325	7422	CGI	FALSE	TRUE	FALSE
cg24940967	chr3	45837197	45837198	SLC6A20	54716	836	CGI-N-Shore	FALSE	TRUE	FALSE
cg24954670	chr3	50337092	50337093	NAT6	24142	-192	CGI	TRUE	FALSE	FALSE
cg24971036	chr3	125093764	125093765	ZNF148	7707	432	CGI	FALSE	TRUE	FALSE
cg25007165	chr3	183165436	183165437	LOC100505687	100505687	39	CGI	TRUE	FALSE	FALSE
cg25129124	chr3	42727489	42727490	KLHL40	131377	477	CGI	TRUE	FALSE	FALSE
cg25146976	chr3	9550667	9550668	LHFPL4	375323	44817	CGI	FALSE	TRUE	FALSE
cg25153601	chr3	194406474	194406475	FAM43A	131583	-146	CGI	TRUE	FALSE	FALSE
cg25159927	chr3	49947934	49947935	MST1R	4486	-6627	CGI	FALSE	TRUE	FALSE
cg25198428	chr3	72496181	72496182	RYBP	23429	-406	CGI	TRUE	FALSE	FALSE
cg25436886	chr3	127056972	127056973	TPRA1	131601	252594	CGI	FALSE	TRUE	FALSE
cg25445931	chr3	142575504	142575505	PCOLCE2	26577	32539	Non-CGI	FALSE	TRUE	FALSE
cg25506747	chr3	157813810	157813811	SHOX2	6474	10140	CGI-S-Shore	FALSE	TRUE	FALSE
cg25513924	chr3	187009486	187009487	MASP1	5648	322	Non-CGI	TRUE	TRUE	FALSE
cg25611254	chr3	124931985	124931986	SLC12A8	84561	66104	CGI	TRUE	TRUE	FALSE
cg25645064	chr3	147096130	147096131	ZIC4	84107	28464	CGI-N-Shelf	FALSE	FALSE	TRUE
cg25716846	chr3	42641998	42641999	NKTR	4820	-147	CGI	TRUE	TRUE	FALSE
cg25743481	chr3	44803289	44803290	KIF15	56992	79	CGI	TRUE	FALSE	FALSE
cg25821785	chr3	50403130	50403131	TMEM115	11070	-6190	CGI-S-Shore	FALSE	TRUE	FALSE
cg26162331	chr3	39322541	39322542	CX3CR1	1524	683	Non-CGI	TRUE	TRUE	FALSE
cg26350347	chr3	30936397	30936398	GADL1	339896	-243	CGI-S-Shore	TRUE	FALSE	FALSE
cg26460030	chr3	69134087	69134088	ARL6IP5	10550	-1	CGI-N-Shore	TRUE	FALSE	FALSE
cg26554505	chr3	55516711	55516712	WNT5A	7474	4618	CGI	TRUE	TRUE	FALSE
cg27222803	chr3	193310868	193310869	OPA1	4976	-63	CGI	TRUE	FALSE	FALSE
cg27279460	chr3	111697713	111697714	ABHD10	55347	-113	CGI	TRUE	FALSE	FALSE
cg27335386	chr3	195808921	195808922	TFRC	7037	109	CGI	TRUE	FALSE	FALSE
cg27402499	chr3	15469042	15469043	METTL6	131965	0	CGI	TRUE	FALSE	FALSE
cg27549834	chr3	39850412	39850413	MYRIP	25924	-889	CGI	TRUE	FALSE	FALSE
cg27604613	chr3	105588211	105588212	CBLB	868	53	CGI	TRUE	FALSE	FALSE
cg00043819	chr4	185942529	185942530	HELT	391723	2533	CGI	FALSE	FALSE	TRUE
cg00233079	chr4	108745587	108745588	SGMS2	166929	-132	CGI	TRUE	FALSE	FALSE
cg00316839	chr4	85414135	85414136	NKX6-1	4825	5250	CGI	FALSE	FALSE	TRUE
cg00354941	chr4	48833206	48833207	OCIAD1	54940	145	CGI	TRUE	FALSE	FALSE
cg00393585	chr4	165878091	165878092	FAM218A	152756	-7	CGI	TRUE	TRUE	FALSE
cg00463561	chr4	110737452	110737453	GAR1	54433	785	CGI	TRUE	TRUE	FALSE
cg00663077	chr4	188916709	188916710	ZFP42	132625	-214	CGI	TRUE	FALSE	FALSE
cg00677217	chr4	3747401	3747402	ADRA2C	152	-20893	CGI	FALSE	FALSE	TRUE
cg00696756	chr4	152020723	152020724	RPS3A	6189	-29	CGI	TRUE	FALSE	FALSE
cg00811051	chr4	100868099	100868100	DNAJB14	79982	-219	CGI	TRUE	FALSE	FALSE
cg00940891	chr4	1006016	1006017	FGFRL1	53834	1075	CGI	TRUE	TRUE	FALSE
cg01281776	chr4	20253595	20253596	SLIT2	9353	-1638	CGI	TRUE	FALSE	FALSE
cg01718788	chr4	78740310	78740311	CNOT6L	246175	232	CGI	FALSE	TRUE	FALSE
cg01899437	chr4	24914441	24914442	CCDC149	91050	67383	CGI	TRUE	TRUE	FALSE
cg02044219	chr4	25032562	25032563	LGI2	55203	-147	CGI	TRUE	FALSE	FALSE
cg02428792	chr4	25090597	25090598	LGI2	55203	-58182	CGI-S-Shore	FALSE	FALSE	TRUE
cg02552216	chr4	184426031	184426032	ING2	3622	-187	CGI	TRUE	FALSE	FALSE
cg02725493	chr4	8025039	8025040	AFAP1	60312	-83385	CGI	FALSE	TRUE	FALSE
cg02829845	chr4	188963260	188963261	ZFP42	132625	46334	CGI	FALSE	FALSE	TRUE
cg02930317	chr4	146100881	146100882	OTUD4	54726	-48	CGI	TRUE	FALSE	FALSE
cg02956372	chr4	967467	967468	DGKQ	1609	-122	CGI	TRUE	FALSE	FALSE
cg03142411	chr4	3375410	3375411	HGFAC	3083	-68314	CGI	FALSE	TRUE	FALSE
cg03214478	chr4	1355389	1355390	UVSSA	57654	14284	CGI	FALSE	TRUE	FALSE
cg03222374	chr4	3773996	3773997	ADRA2C	152	5699	CGI	FALSE	FALSE	TRUE
cg03838806	chr4	6477277	6477278	PPP2R2C	5522	88048	CGI-S-Shelf	FALSE	TRUE	FALSE
cg03921860	chr4	57458733	57458734	ARL9	132946	87357	CGI	FALSE	FALSE	TRUE
cg04085768	chr4	113333052	113333053	NEUROG2	63973	104274	CGI	TRUE	TRUE	FALSE
cg04195548	chr4	1206004	1206005	LOC100130872	100130872	-3253	CGI	FALSE	TRUE	FALSE
cg04355093	chr4	85887382	85887383	WDFY3	23001	160	CGI	TRUE	FALSE	FALSE
cg04380635	chr4	83812509	83812510	THAP9	79725	-9326	CGI	TRUE	TRUE	FALSE
cg04498802	chr4	4292234	4292235	ZBTB49	166793	309	CGI	TRUE	TRUE	FALSE
cg04589118	chr4	2848840	2848841	ADD1	118	3255	CGI-S-Shelf	FALSE	TRUE	FALSE
cg04764131	chr4	16228633	16228634	TAPT1-AS1	202020	346	CGI	TRUE	FALSE	FALSE
cg05161119	chr4	785696	785697	LOC100129917	100129917	-10059	CGI	FALSE	TRUE	FALSE
cg05273429	chr4	1983380	1983381	MIR943	100126332	4822	CGI-S-Shore	FALSE	TRUE	FALSE
cg05352767	chr4	186347434	186347435	UFSP2	55325	-294	CGI	TRUE	FALSE	FALSE
cg05756848	chr4	84457469	84457470	AGPAT9	84803	207	CGI	TRUE	TRUE	FALSE
cg05767633	chr4	88140994	88140995	KLHL8	57563	678	CGI	FALSE	TRUE	FALSE
cg05961809	chr4	154710523	154710524	SFRP2	6423	-294	CGI	TRUE	FALSE	FALSE
cg06034885	chr4	17812352	17812353	DCAF16	54876	27	CGI	TRUE	FALSE	FALSE
cg06062125	chr4	76598767	76598768	G3BP2	9908	-99	CGI	TRUE	FALSE	FALSE
cg06074123	chr4	56660460	56660461	LOC644145	644145	-25775	CGI	FALSE	FALSE	TRUE
cg06132727	chr4	174422191	174422192	HAND2	9464	29185	CGI	FALSE	FALSE	TRUE
cg06382894	chr4	138453502	138453503	PCDH18	54510	144	CGI	TRUE	FALSE	FALSE
cg06424065	chr4	6247640	6247641	WFS1	7466	-23935	CGI	FALSE	FALSE	TRUE
cg06481168	chr4	165878055	165878056	FAM218A	152756	-43	CGI-N-Shore	TRUE	TRUE	FALSE
cg06545742	chr4	1723058	1723059	TMEM129	92305	24	CGI	TRUE	FALSE	FALSE
cg06995558	chr4	7044990	7044991	TADA2B	93624	-164	CGI	TRUE	TRUE	FALSE
cg07080653	chr4	54374249	54374250	PDGFRA	5156	130428	Non-CGI	FALSE	TRUE	FALSE
cg07171111	chr4	10462903	10462904	ZNF518B	85460	-3870	CGI	FALSE	FALSE	TRUE
cg07196207	chr4	83812271	83812272	THAP9	79725	-9564	CGI	TRUE	TRUE	FALSE
cg07242805	chr4	2264197	2264198	MXD4	10608	-457	CGI	TRUE	FALSE	FALSE
cg07509992	chr4	3742224	3742225	ADRA2C	152	-26070	CGI	FALSE	FALSE	TRUE
cg07640645	chr4	175204879	175204880	CEP44	80817	50	CGI	TRUE	FALSE	FALSE
cg07658508	chr4	973177	973178	DGKQ	1609	-5832	CGI-N-Shore	FALSE	TRUE	FALSE
cg07976816	chr4	6883843	6883844	TBC1D14	57533	-27326	CGI-N-Shore	FALSE	TRUE	FALSE
cg07997294	chr4	113437801	113437802	NEUROG2	63973	-472	CGI	TRUE	FALSE	FALSE
cg08032641	chr4	3873418	3873419	FAM86EP	348926	83728	CGI	FALSE	FALSE	TRUE
cg08102414	chr4	1570791	1570792	FAM53A	152877	115195	CGI	FALSE	FALSE	TRUE
cg08267183	chr4	7057302	7057303	LOC100129931	100129931	-9343	CGI	TRUE	TRUE	FALSE
cg08346159	chr4	164265012	164265013	NPY5R	4889	-77	CGI	TRUE	FALSE	FALSE
cg08388763	chr4	20986246	20986247	PACRGL	133015	288340	CGI-S-Shore	TRUE	TRUE	FALSE
cg08492624	chr4	83206108	83206109	HNRNPD	3184	89039	CGI	FALSE	FALSE	TRUE
cg08718490	chr4	52943099	52943100	SPATA18	132671	25505	CGI	FALSE	TRUE	FALSE
cg08854306	chr4	91048557	91048558	CCSER1	401145	-125	CGI	TRUE	FALSE	FALSE
cg08947915	chr4	1742463	1742464	TACC3	10460	19245	CGI	FALSE	TRUE	FALSE
cg09070522	chr4	57774717	57774718	REST	5978	674	CGI	TRUE	TRUE	FALSE
cg09111071	chr4	38665154	38665155	KLF3	51274	-634	CGI	TRUE	TRUE	FALSE
cg09125779	chr4	57547999	57548000	HOPX	84525	-126	Non-CGI	TRUE	FALSE	FALSE
cg09780241	chr4	111535597	111535598	PITX2	5308	27680	CGI	FALSE	FALSE	TRUE
cg09796800	chr4	128651518	128651519	SLC25A31	83447	-35	CGI	TRUE	FALSE	FALSE
cg09986292	chr4	13525605	13525606	LOC285547	285547	7434	CGI	FALSE	FALSE	TRUE
cg09994756	chr4	8185163	8185164	SH3TC1	54436	-15895	Non-CGI	FALSE	FALSE	TRUE
cg10132348	chr4	6784379	6784380	KIAA0232	9778	-78	CGI	TRUE	FALSE	FALSE
cg10184864	chr4	9693329	9693330	DRD5	1816	-89927	CGI	FALSE	FALSE	TRUE
cg10664842	chr4	7710280	7710281	AFAP1-AS1	84740	-45535	CGI	FALSE	TRUE	FALSE
cg10744200	chr4	24844162	24844163	SOD3	6649	47076	Non-CGI	FALSE	TRUE	FALSE
cg10748160	chr4	6202384	6202385	JAKMIP1	152789	-65	CGI	TRUE	FALSE	FALSE
cg10754215	chr4	8073804	8073805	ABLIM2	84448	86753	CGI	TRUE	TRUE	FALSE
cg10755899	chr4	1772151	1772152	FGFR3	2261	-22886	CGI	FALSE	FALSE	TRUE
cg10783050	chr4	185377277	185377278	IRF2	3660	18447	CGI	FALSE	TRUE	FALSE
cg10911275	chr4	158965418	158965419	FAM198B	51313	128782	CGI	FALSE	FALSE	TRUE
cg11078084	chr4	4864902	4864903	MSX1	4487	3509	CGI	FALSE	TRUE	FALSE
cg11229771	chr4	640503	640504	PDE6B	5158	21139	CGI	FALSE	TRUE	FALSE
cg11300971	chr4	89619038	89619039	NAP1L5	266812	-14	CGI	TRUE	TRUE	FALSE
cg11317690	chr4	6347280	6347281	WFS1	7466	75702	CGI	FALSE	TRUE	FALSE
cg11396712	chr4	187527289	187527290	MTNR1A	4543	-50751	CGI-S-Shelf	FALSE	TRUE	FALSE
cg11398097	chr4	100484902	100484903	TRMT10A	93587	285	CGI	TRUE	TRUE	FALSE
cg11416384	chr4	37246827	37246828	KIAA1239	57495	136	CGI	TRUE	FALSE	FALSE
cg11505338	chr4	55991850	55991851	KDR	3791	-87	CGI	TRUE	FALSE	FALSE
cg11630554	chr4	165878136	165878137	FAM218A	152756	35	CGI	TRUE	TRUE	FALSE
cg11777917	chr4	1804816	1804817	FGFR3	2261	9776	CGI	FALSE	TRUE	FALSE
cg11976233	chr4	56719715	56719716	EXOC1	55763	-99	CGI-N-Shore	TRUE	FALSE	FALSE
cg12452946	chr4	128886867	128886868	MFSD8	256471	270	CGI	TRUE	TRUE	FALSE
cg12455762	chr4	40859095	40859096	NSUN7	79730	107180	CGI	TRUE	TRUE	FALSE
cg12838192	chr4	121993196	121993197	NDNF	79625	475	CGI	TRUE	FALSE	FALSE
cg13035290	chr4	7738930	7738931	AFAP1-AS1	84740	-16885	CGI	FALSE	TRUE	FALSE
cg13036321	chr4	166248467	166248468	MSMO1	6307	-349	CGI-N-Shore	TRUE	FALSE	FALSE
cg13101767	chr4	907758	907759	GAK	2580	18414	CGI	FALSE	TRUE	FALSE
cg13191718	chr4	39184141	39184142	WDR19	57728	116	CGI	TRUE	FALSE	FALSE
cg13197406	chr4	57687839	57687840	SPINK2	6691	52	CGI	TRUE	FALSE	FALSE
cg13348530	chr4	7283184	7283185	MIR4798	100616471	-28991	CGI	FALSE	TRUE	FALSE
cg13506653	chr4	54965863	54965864	GSX2	170825	-383	CGI	TRUE	TRUE	FALSE
cg13511000	chr4	94750997	94750998	ATOH1	474	918	CGI	TRUE	FALSE	FALSE
cg13644262	chr4	6449564	6449565	PPP2R2C	5522	115761	CGI-N-Shore	FALSE	TRUE	FALSE
cg13764248	chr4	3234933	3234934	MSANTD1	345222	-15832	CGI-S-Shelf	FALSE	TRUE	FALSE
cg14069049	chr4	11430698	11430699	HS3ST1	9957	-160	CGI	TRUE	FALSE	FALSE
cg14094333	chr4	38666051	38666052	KLF3	51274	260	CGI	TRUE	TRUE	FALSE
cg14102066	chr4	147867120	147867121	TTC29	83894	-85	CGI	TRUE	FALSE	FALSE
cg14108327	chr4	890186	890187	GAK	2580	35986	CGI-S-Shore	FALSE	TRUE	FALSE
cg14349667	chr4	81189706	81189707	FGF5	2250	1963	CGI-S-Shore	FALSE	TRUE	FALSE
cg14561596	chr4	133045178	133045179	PCDH10	57575	-1025290	CGI	FALSE	FALSE	TRUE
cg14595558	chr4	7789738	7789739	AFAP1-AS1	84740	33920	CGI	FALSE	TRUE	FALSE
cg14717666	chr4	119862992	119862993	SYNPO2	171024	52995	Non-CGI	FALSE	TRUE	FALSE
cg14742802	chr4	8153998	8153999	ABLIM2	84448	6559	CGI	FALSE	TRUE	FALSE
cg14817655	chr4	188916724	188916725	ZFP42	132625	-199	CGI	TRUE	FALSE	FALSE
cg14840727	chr4	7783969	7783970	AFAP1-AS1	84740	28151	Non-CGI	FALSE	TRUE	FALSE
cg14866200	chr4	42399843	42399844	SHISA3	152573	-11	CGI	TRUE	FALSE	FALSE
cg14919643	chr4	1367748	1367749	CRIPAK	285464	-17590	CGI	FALSE	TRUE	FALSE
cg15111822	chr4	3425910	3425911	HGFAC	3083	-17814	CGI-S-Shore	FALSE	TRUE	FALSE
cg15165230	chr4	3630746	3630747	LOC100133461	100133461	48834	CGI	FALSE	FALSE	TRUE
cg15287410	chr4	3502575	3502576	LRPAP1	4043	31647	CGI	FALSE	TRUE	FALSE
cg15296129	chr4	109542144	109542145	RPL34	6164	421	CGI	TRUE	TRUE	FALSE
cg15642673	chr4	3704880	3704881	LOC100133461	100133461	-25297	Non-CGI	FALSE	FALSE	TRUE
cg15852258	chr4	154605258	154605259	TLR2	7097	-181	CGI	TRUE	FALSE	FALSE
cg15874062	chr4	143767647	143767648	INPP4B	8821	-42	CGI	TRUE	FALSE	FALSE
cg16117799	chr4	81106857	81106858	PRDM8	56978	1417	CGI	FALSE	TRUE	FALSE
cg16147221	chr4	10020634	10020635	SLC2A9	56606	21236	CGI	FALSE	TRUE	FALSE
cg16220124	chr4	13549839	13549840	LOC285548	285548	-390	CGI	TRUE	FALSE	FALSE
cg16364495	chr4	40859251	40859252	NSUN7	79730	107336	CGI	TRUE	TRUE	FALSE
cg16547110	chr4	154605262	154605263	TLR2	7097	-177	CGI	TRUE	FALSE	FALSE
cg16784566	chr4	3514627	3514628	LRPAP1	4043	19595	CGI	FALSE	TRUE	FALSE
cg16786640	chr4	3485263	3485264	DOK7	285489	20229	CGI-N-Shore	TRUE	TRUE	FALSE
cg16792066	chr4	185570396	185570397	CASP3	836	231	CGI	TRUE	TRUE	FALSE
cg17036949	chr4	2937134	2937135	NOP14-AS1	317648	507	CGI	TRUE	FALSE	FALSE
cg17089511	chr4	2438721	2438722	LOC402160	402160	18019	CGI	FALSE	TRUE	FALSE
cg17949969	chr4	8073790	8073791	ABLIM2	84448	86767	CGI	TRUE	TRUE	FALSE
cg18168751	chr4	974821	974822	IDUA	3425	-5962	CGI	FALSE	TRUE	FALSE
cg18295838	chr4	15005434	15005435	CPEB2	132864	1135	CGI	TRUE	FALSE	FALSE
cg18351939	chr4	41883164	41883165	TMEM33	55161	-53971	CGI	FALSE	TRUE	FALSE
cg18638914	chr4	779568	779569	LOC100129917	100129917	-3931	CGI	FALSE	TRUE	FALSE
cg18755653	chr4	108910870	108910871	HADH	3033	0	CGI	TRUE	FALSE	FALSE
cg18866267	chr4	3310044	3310045	RGS12	6002	15288	CGI	TRUE	TRUE	FALSE
cg19019849	chr4	13533145	13533146	LOC285547	285547	-103	CGI	TRUE	FALSE	FALSE
cg19168309	chr4	99850801	99850802	EIF4E	1977	983	CGI	TRUE	FALSE	FALSE
cg19346473	chr4	97047135	97047136	PDHA2	5161	285895	CGI	FALSE	FALSE	TRUE
cg19593680	chr4	7374669	7374670	PSAPL1	768239	62029	CGI-S-Shore	FALSE	TRUE	FALSE
cg19769188	chr4	1379448	1379449	CRIPAK	285464	-5890	CGI	FALSE	TRUE	FALSE
cg19780308	chr4	140754450	140754451	MGST2	4258	167527	Non-CGI	FALSE	TRUE	FALSE
cg19936614	chr4	187627811	187627812	FAT1	2195	20037	CGI-N-Shore	FALSE	TRUE	FALSE
cg19955849	chr4	140095286	140095287	ELF2	1998	-34634	CGI-N-Shelf	FALSE	FALSE	TRUE
cg19999682	chr4	14864863	14864864	LOC441009	441009	138804	CGI-S-Shore	FALSE	TRUE	FALSE
cg20107996	chr4	12886669	12886670	HSP90AB2P	391634	-448366	Non-CGI	FALSE	FALSE	TRUE
cg20125971	chr4	56458333	56458334	PDCL2	132954	44	CGI	TRUE	FALSE	FALSE
cg20478578	chr4	79103030	79103031	FRAS1	80144	124305	CGI	FALSE	TRUE	FALSE
cg20519524	chr4	8472938	8472939	ACOX3	8310	-30485	CGI	FALSE	TRUE	FALSE
cg20533530	chr4	3443694	3443695	HGFAC	3083	-30	CGI-N-Shelf	TRUE	FALSE	FALSE
cg20697094	chr4	165878037	165878038	FAM218A	152756	-61	CGI-N-Shore	TRUE	TRUE	FALSE
cg20699200	chr4	6675674	6675675	LOC93622	93622	-145	CGI	TRUE	FALSE	FALSE
cg20764212	chr4	6331035	6331036	WFS1	7466	59457	CGI	FALSE	TRUE	FALSE
cg20948258	chr4	789807	789808	LOC100129917	100129917	-14170	CGI	FALSE	TRUE	FALSE
cg20978694	chr4	2061804	2061805	NAT8L	339983	564	CGI	FALSE	TRUE	FALSE
cg21012788	chr4	8642306	8642307	CPZ	8532	60088	CGI-N-Shore	FALSE	FALSE	TRUE
cg21041888	chr4	187622164	187622165	FAT1	2195	25684	CGI	FALSE	TRUE	FALSE
cg21077885	chr4	47465763	47465764	COMMD8	54951	-86	CGI	TRUE	FALSE	FALSE
cg21329599	chr4	7194519	7194520	SORCS2	57537	144	CGI	TRUE	FALSE	FALSE
cg21366198	chr4	185655624	185655625	MLF1IP	79682	-337	CGI	TRUE	FALSE	FALSE
cg21397393	chr4	1107706	1107707	RNF212	285498	-353	CGI	TRUE	FALSE	FALSE
cg21657059	chr4	154711470	154711471	SFRP2	6423	-1241	CGI	TRUE	FALSE	FALSE
cg21732915	chr4	156588072	156588073	GUCY1A3	2982	209	CGI-N-Shore	TRUE	FALSE	FALSE
cg21952115	chr4	141174990	141174991	SCOC	60592	-3448	CGI-S-Shore	FALSE	FALSE	TRUE
cg22083643	chr4	128886446	128886447	C4orf29	80167	-13	CGI	TRUE	TRUE	FALSE
cg22103164	chr4	155702409	155702410	RBM46	166863	-16	CGI	TRUE	FALSE	FALSE
cg22115892	chr4	177198411	177198412	ASB5	140458	-8037	Non-CGI	FALSE	FALSE	TRUE
cg22351267	chr4	1526253	1526254	CRIPAK	285464	140912	CGI	FALSE	FALSE	TRUE
cg22475974	chr4	3748341	3748342	ADRA2C	152	-19953	CGI	FALSE	FALSE	TRUE
cg22646324	chr4	3768078	3768079	ADRA2C	152	-216	CGI	TRUE	FALSE	FALSE
cg22873539	chr4	147554210	147554211	POU4F2	5458	-5833	CGI	FALSE	FALSE	TRUE
cg23377495	chr4	100963223	100963224	LOC256880	256880	91586	Non-CGI	FALSE	FALSE	TRUE
cg23462514	chr4	1107585	1107586	RNF212	285498	-232	CGI	TRUE	FALSE	FALSE
cg23475278	chr4	128651543	128651544	SLC25A31	83447	-10	CGI	TRUE	FALSE	FALSE
cg23629643	chr4	77547320	77547321	MIR4450	100616299	52598	Non-CGI	FALSE	TRUE	FALSE
cg23675401	chr4	4867481	4867482	MSX1	4487	6088	CGI	FALSE	FALSE	TRUE
cg23804620	chr4	6690894	6690895	S100P	6286	-4670	CGI	FALSE	FALSE	TRUE
cg23978161	chr4	77870897	77870898	2011-09-01	55752	1	CGI	TRUE	FALSE	FALSE
cg24013618	chr4	870925	870926	CPLX1	10815	-50979	CGI	FALSE	TRUE	FALSE
cg24015522	chr4	2944550	2944551	NOP14-AS1	317648	7923	CGI	FALSE	TRUE	FALSE
cg24023097	chr4	152330337	152330338	FAM160A1	729830	-59	CGI	TRUE	FALSE	FALSE
cg24093763	chr4	11431253	11431254	HS3ST1	9957	-715	CGI	TRUE	FALSE	FALSE
cg24232092	chr4	1364344	1364345	CRIPAK	285464	-20994	CGI	FALSE	TRUE	FALSE
cg24454219	chr4	492856	492857	PIGG	54872	-131	CGI-N-Shore	TRUE	FALSE	FALSE
cg24483247	chr4	5890411	5890412	CRMP1	1400	4372	CGI	TRUE	TRUE	FALSE
cg24512097	chr4	156298332	156298333	MAP9	79884	-209	CGI	TRUE	FALSE	FALSE
cg24526669	chr4	828198	828199	CPLX1	10815	-8252	CGI	FALSE	FALSE	TRUE
cg24740896	chr4	8442590	8442591	ACOX3	8310	-137	CGI	TRUE	TRUE	FALSE
cg25018951	chr4	25235369	25235370	LOC285540	285540	73074	CGI-N-Shore	TRUE	TRUE	FALSE
cg25053798	chr4	89206063	89206064	PPM1K	152926	-174	CGI	TRUE	FALSE	FALSE
cg25137687	chr4	74904521	74904522	CXCL3	2921	-30	CGI	TRUE	FALSE	FALSE
cg25174438	chr4	85403915	85403916	NKX6-1	4825	15470	CGI	FALSE	FALSE	TRUE
cg25964517	chr4	78034545	78034546	CCNI	10983	-37419	CGI	FALSE	FALSE	TRUE
cg26105156	chr4	81951953	81951954	BMP3	651	-164	CGI	TRUE	FALSE	FALSE
cg26265657	chr4	122618170	122618171	ANXA5	308	-22	CGI	TRUE	FALSE	FALSE
cg26401028	chr4	3516534	3516535	LRPAP1	4043	17688	CGI	FALSE	TRUE	FALSE
cg26546685	chr4	100870642	100870643	H2AFZ	3015	868	CGI	TRUE	TRUE	FALSE
cg26633084	chr4	56660328	56660329	LOC644145	644145	-25907	CGI	FALSE	FALSE	TRUE
cg26675664	chr4	1408936	1408937	CRIPAK	285464	23595	CGI	FALSE	FALSE	TRUE
cg26695837	chr4	37688098	37688099	RELL1	768211	-98	CGI	TRUE	FALSE	FALSE
cg26814276	chr4	172734266	172734267	GALNTL6	442117	-307	CGI	TRUE	FALSE	FALSE
cg26839512	chr4	52918489	52918490	SPATA18	132671	895	CGI	FALSE	TRUE	FALSE
cg26860935	chr4	1407989	1407990	CRIPAK	285464	22648	CGI-S-Shore	FALSE	FALSE	TRUE
cg27207756	chr4	1607291	1607292	FAM53A	152877	78695	CGI	FALSE	FALSE	TRUE
cg27207796	chr4	17783322	17783323	FAM184B	27146	-186	CGI	TRUE	FALSE	FALSE
cg27451230	chr4	77870891	77870892	2011-09-01	55752	-2	CGI	TRUE	FALSE	FALSE
cg27574071	chr4	1219498	1219499	LOC100130872	100130872	-16747	CGI	FALSE	TRUE	FALSE
cg27577070	chr4	2263840	2263841	MXD4	10608	-100	CGI	TRUE	FALSE	FALSE
cg00042478	chr5	14710790	14710791	FAM105B	90268	46006	CGI	FALSE	TRUE	FALSE
cg00131372	chr5	148651363	148651364	AFAP1L1	134265	-36	CGI	TRUE	FALSE	FALSE
cg00426310	chr5	139030390	139030391	CXXC5	51523	2088	CGI	FALSE	TRUE	FALSE
cg00558737	chr5	153418398	153418399	FAM114A2	10827	97	CGI	TRUE	TRUE	FALSE
cg01022678	chr5	52095538	52095539	ITGA1	3672	11763	CGI	FALSE	TRUE	FALSE
cg01171355	chr5	1087281	1087282	MIR4635	100616479	-24191	CGI	FALSE	TRUE	FALSE
cg01287088	chr5	176827392	176827393	PFN3	345456	243	CGI	TRUE	FALSE	FALSE
cg01474424	chr5	155754231	155754232	PPP1R2P3	153743	-523316	Non-CGI	TRUE	TRUE	FALSE
cg01781963	chr5	61028748	61028749	C5orf64	285668	95111	CGI	FALSE	TRUE	FALSE
cg01808736	chr5	219908	219909	SDHA	6389	1551	CGI-S-Shore	TRUE	TRUE	FALSE
cg01862688	chr5	140480872	140480873	PCDHB3	56132	637	CGI	TRUE	TRUE	FALSE
cg02004641	chr5	140306181	140306182	PCDHAC1	56135	-119	CGI	TRUE	TRUE	FALSE
cg02074191	chr5	140779461	140779462	PCDHGB5	56101	1765	CGI	TRUE	TRUE	FALSE
cg02083373	chr5	74807542	74807543	POLK	51426	-113	CGI	TRUE	TRUE	FALSE
cg02150369	chr5	52775702	52775703	FST	10468	-560	CGI	TRUE	FALSE	FALSE
cg02162286	chr5	5887361	5887362	FLJ33360	401172	450042	CGI	FALSE	FALSE	TRUE
cg02265379	chr5	87898506	87898507	MIR9-2	407047	64249	CGI-N-Shore	FALSE	TRUE	FALSE
cg02304092	chr5	126409227	126409228	C5orf63	401207	-42	CGI	TRUE	FALSE	FALSE
cg02444433	chr5	23507469	23507470	PRDM9	56979	-253	CGI	TRUE	FALSE	FALSE
cg02671458	chr5	178801812	178801813	ADAMTS2	9509	-29380	CGI-S-Shore	FALSE	FALSE	TRUE
cg02692390	chr5	172657465	172657466	NKX2-5	1482	4848	CGI-S-Shore	FALSE	FALSE	TRUE
cg02722596	chr5	140762957	140762958	PCDHGA7	56108	489	CGI	TRUE	TRUE	FALSE
cg02741440	chr5	41509882	41509883	PLCXD3	345557	846	CGI	FALSE	TRUE	FALSE
cg03235119	chr5	176449645	176449646	ZNF346	23567	-50	CGI	TRUE	FALSE	FALSE
cg03323696	chr5	59189120	59189121	PART1	25859	-594418	CGI	TRUE	TRUE	FALSE
cg03625177	chr5	135364556	135364557	TGFBI	7045	-26	CGI-N-Shore	TRUE	FALSE	FALSE
cg03727213	chr5	177740217	177740218	AGXT2L2	85007	-80413	CGI	FALSE	TRUE	FALSE
cg03839288	chr5	1183107	1183108	SLC6A19	340024	-18601	CGI	FALSE	FALSE	TRUE
cg03902565	chr5	43603176	43603177	NNT	23530	384	CGI	TRUE	TRUE	FALSE
cg03993109	chr5	178594649	178594650	ZNF354C	30832	107041	CGI-S-Shore	FALSE	TRUE	FALSE
cg04057238	chr5	71713446	71713447	ZNF366	167465	89801	CGI	FALSE	FALSE	TRUE
cg04124626	chr5	41509934	41509935	PLCXD3	345557	794	CGI	FALSE	TRUE	FALSE
cg04134803	chr5	150080579	150080580	RBM22	55696	88	CGI	TRUE	FALSE	FALSE
cg04223420	chr5	134363877	134363878	PITX1	5307	6085	CGI	FALSE	TRUE	FALSE
cg04223424	chr5	42994776	42994777	LOC648987	648987	24135	CGI	TRUE	FALSE	FALSE
cg04248271	chr5	158524404	158524405	EBF1	1879	2382	CGI	TRUE	TRUE	FALSE
cg04306069	chr5	98175255	98175256	FLJ35946	503569	-66466	CGI-N-Shore	FALSE	FALSE	TRUE
cg04493143	chr5	147862421	147862422	FBXO38	81545	98874	CGI	FALSE	TRUE	FALSE
cg04612169	chr5	134398791	134398792	PITX1	5307	-28826	Non-CGI	FALSE	TRUE	FALSE
cg04633600	chr5	101632286	101632287	SLCO4C1	353189	-32	CGI	TRUE	FALSE	FALSE
cg04823499	chr5	65222365	65222366	ERBB2IP	55914	-15	CGI	TRUE	FALSE	FALSE
cg04992127	chr5	2751854	2751855	IRX2	153572	-84	CGI-S-Shore	TRUE	FALSE	FALSE
cg05016408	chr5	150326174	150326175	ZNF300P1	134466	-27	CGI	TRUE	FALSE	FALSE
cg05173828	chr5	1382175	1382176	CLPTM1L	81037	-37172	CGI-S-Shore	TRUE	FALSE	FALSE
cg05212464	chr5	154071076	154071077	LARP1	23367	-21384	CGI	FALSE	FALSE	TRUE
cg05214690	chr5	178772203	178772204	ADAMTS2	9509	226	CGI	TRUE	FALSE	FALSE
cg05574515	chr5	178632502	178632503	ADAMTS2	9509	139927	CGI-S-Shore	FALSE	TRUE	FALSE
cg05578452	chr5	179255653	179255654	MGAT4B	11282	-21700	Non-CGI	FALSE	TRUE	FALSE
cg05606376	chr5	38446192	38446193	MIR3650	100500824	111469	CGI	FALSE	TRUE	FALSE
cg05706117	chr5	38258451	38258452	EGFLAM	133584	-58	CGI	TRUE	FALSE	FALSE
cg05714559	chr5	149980682	149980683	SYNPO	11346	39	Non-CGI	TRUE	FALSE	FALSE
cg05922971	chr5	43121458	43121459	ZNF131	7690	472	CGI	TRUE	TRUE	FALSE
cg05928650	chr5	52285130	52285131	ITGA2	3673	-24	CGI	TRUE	FALSE	FALSE
cg05948408	chr5	88178572	88178573	MEF2C	4208	21348	CGI-N-Shore	FALSE	TRUE	FALSE
cg06010443	chr5	178594583	178594584	ZNF354C	30832	106975	CGI-S-Shore	FALSE	TRUE	FALSE
cg06593603	chr5	1218042	1218043	SLC6A18	348932	-7426	CGI	FALSE	TRUE	FALSE
cg06609496	chr5	1174426	1174427	SLC6A19	340024	-27282	CGI-S-Shore	FALSE	TRUE	FALSE
cg06610368	chr5	86564371	86564372	RASA1	5921	300	CGI	TRUE	FALSE	FALSE
cg06781712	chr5	19988288	19988289	CDH18	1016	587692	CGI-N-Shore	TRUE	TRUE	FALSE
cg06802812	chr5	40679165	40679166	PTGER4	5734	-865	CGI-N-Shore	TRUE	FALSE	FALSE
cg06857674	chr5	175110641	175110642	HRH2	3274	25600	Non-CGI	TRUE	TRUE	FALSE
cg06883126	chr5	140457585	140457586	PCDHB2	56133	-16650	CGI	FALSE	FALSE	TRUE
cg06904356	chr5	1849983	1849984	IRX4	50805	32895	CGI-N-Shore	FALSE	FALSE	TRUE
cg07011961	chr5	23507594	23507595	PRDM9	56979	-128	CGI	TRUE	FALSE	FALSE
cg07028258	chr5	1300819	1300820	TERT	7015	-5656	CGI	FALSE	FALSE	TRUE
cg07041883	chr5	76476158	76476159	PDE8B	8622	-30546	CGI	FALSE	FALSE	TRUE
cg07167946	chr5	1878205	1878206	IRX4	50805	4673	CGI	FALSE	TRUE	FALSE
cg07264189	chr5	131132424	131132425	RAPGEF6	51735	330	CGI	FALSE	TRUE	FALSE
cg07360792	chr5	122425702	122425703	PRDM6	93166	860	CGI	TRUE	TRUE	FALSE
cg07389500	chr5	137681244	137681245	KDM3B	51780	-7039	CGI	FALSE	TRUE	FALSE
cg07432626	chr5	146889536	146889537	DPYSL3	1809	81	CGI	TRUE	FALSE	FALSE
cg07459121	chr5	1092793	1092794	SLC12A7	10723	19377	CGI-S-Shore	FALSE	TRUE	FALSE
cg07489502	chr5	140811642	140811643	PCDHGA12	26025	1483	CGI	TRUE	TRUE	FALSE
cg07595776	chr5	77253990	77253991	TBCA	6902	-181804	CGI	FALSE	FALSE	TRUE
cg07747251	chr5	1868357	1868358	IRX4	50805	14521	CGI	FALSE	FALSE	TRUE
cg07752120	chr5	70746259	70746260	BDP1	55814	-5181	Non-CGI	FALSE	FALSE	TRUE
cg08340453	chr5	118309333	118309334	MIR1244-1	100302285	-946	CGI-N-Shore	TRUE	TRUE	FALSE
cg08436104	chr5	38168076	38168077	EGFLAM	133584	-90433	Non-CGI	FALSE	FALSE	TRUE
cg08513100	chr5	133706722	133706723	CDKL3	51265	11	CGI-N-Shore	TRUE	FALSE	FALSE
cg08609839	chr5	1380611	1380612	CLPTM1L	81037	-35608	CGI	TRUE	FALSE	FALSE
cg08717980	chr5	1386005	1386006	CLPTM1L	81037	-41002	CGI	FALSE	FALSE	TRUE
cg08840551	chr5	56718349	56718350	ACTBL2	345651	60285	CGI	FALSE	FALSE	TRUE
cg08888487	chr5	1124759	1124760	SLC12A7	10723	-12586	CGI	FALSE	FALSE	TRUE
cg09049672	chr5	159343481	159343482	ADRA1B	147	-257	CGI	TRUE	FALSE	FALSE
cg09077340	chr5	153418539	153418540	MFAP3	4238	19	CGI	TRUE	FALSE	FALSE
cg09442149	chr5	2564582	2564583	IRX2	153572	187185	CGI	FALSE	FALSE	TRUE
cg09497020	chr5	893046	893047	TRIP13	9319	76	CGI	TRUE	FALSE	FALSE
cg09499856	chr5	41510325	41510326	PLCXD3	345557	403	CGI	FALSE	TRUE	FALSE
cg09570348	chr5	140768251	140768252	PCDHGB4	8641	798	CGI	TRUE	TRUE	FALSE
cg09648809	chr5	1207231	1207232	SLC6A19	340024	5520	CGI	FALSE	TRUE	FALSE
cg09867598	chr5	122429517	122429518	PRDM6	93166	4675	CGI-N-Shore	FALSE	TRUE	FALSE
cg10200291	chr5	126409007	126409008	C5orf63	401207	175	CGI-N-Shore	FALSE	TRUE	FALSE
cg10552847	chr5	74632966	74632967	HMGCR	3156	811	CGI	TRUE	TRUE	FALSE
cg10596434	chr5	171878353	171878354	SH3PXD2B	285590	3172	CGI-N-Shelf	FALSE	TRUE	FALSE
cg10666364	chr5	179125825	179125826	CANX	821	396	CGI	TRUE	TRUE	FALSE
cg10812634	chr5	126409211	126409212	C5orf63	401207	-26	CGI	TRUE	FALSE	FALSE
cg10815272	chr5	49962509	49962510	PARP8	79668	775	CGI	TRUE	TRUE	FALSE
cg10986814	chr5	109025713	109025714	MAN2A1	4124	556	CGI	TRUE	FALSE	FALSE
cg11027354	chr5	10761677	10761678	DAP	1611	-289	CGI	TRUE	FALSE	FALSE
cg11229797	chr5	1462612	1462613	SLC6A3	6531	-17068	CGI	FALSE	TRUE	FALSE
cg11245681	chr5	176166754	176166755	UNC5A	90249	-70804	CGI	FALSE	FALSE	TRUE
cg11252048	chr5	160974004	160974005	GABRB2	2561	1124	CGI	TRUE	TRUE	FALSE
cg11350889	chr5	34656553	34656554	RAI14	26064	119	CGI	TRUE	FALSE	FALSE
cg11421768	chr5	912712	912713	TRIP13	9319	19742	CGI	FALSE	TRUE	FALSE
cg11452391	chr5	16180315	16180316	MARCH11	441061	-417	CGI	TRUE	FALSE	FALSE
cg11560600	chr5	121462562	121462563	ZNF474	133923	-2651	Non-CGI	FALSE	FALSE	TRUE
cg11601664	chr5	55189	55190	PLEKHG4B	153478	-85182	CGI	FALSE	FALSE	TRUE
cg11609571	chr5	145215629	145215630	PRELID2	153768	-729	CGI	TRUE	FALSE	FALSE
cg11624524	chr5	172097289	172097290	NEURL1B	54492	29012	CGI	FALSE	TRUE	FALSE
cg11842953	chr5	1218561	1218562	SLC6A18	348932	-6907	CGI	FALSE	TRUE	FALSE
cg11902539	chr5	1241183	1241184	SLC6A18	348932	15712	CGI-N-Shore	FALSE	TRUE	FALSE
cg11911653	chr5	2170490	2170491	IRX4	50805	-287609	CGI	FALSE	FALSE	TRUE
cg12193929	chr5	140237485	140237486	PCDHA10	56139	1850	CGI	TRUE	TRUE	FALSE
cg12317217	chr5	140203603	140203604	PCDHA5	56143	2241	CGI-S-Shore	TRUE	TRUE	FALSE
cg12328282	chr5	162888000	162888001	HMMR	3161	482	CGI	TRUE	TRUE	FALSE
cg12461576	chr5	111755432	111755433	FLJ11235	54508	151	CGI	TRUE	FALSE	FALSE
cg12467264	chr5	175200071	175200072	CPLX2	10814	-23537	CGI	FALSE	FALSE	TRUE
cg12552261	chr5	112820674	112820675	MCC	4163	3851	CGI-N-Shelf	FALSE	TRUE	FALSE
cg12606933	chr5	157078573	157078574	SOX30	11063	19913	CGI	TRUE	TRUE	FALSE
cg12608723	chr5	176208949	176208950	UNC5A	90249	-28609	Non-CGI	FALSE	FALSE	TRUE
cg12842302	chr5	78809010	78809011	HOMER1	9456	688	CGI	TRUE	FALSE	FALSE
cg12980127	chr5	2129874	2129875	IRX4	50805	-246993	CGI	FALSE	FALSE	TRUE
cg13033070	chr5	3188312	3188313	LOC285577	285577	347894	CGI	FALSE	FALSE	TRUE
cg13355253	chr5	2726310	2726311	IRX2	153572	25457	CGI	FALSE	FALSE	TRUE
cg13375518	chr5	107060430	107060431	EFNA5	1946	-53833	CGI-N-Shore	FALSE	FALSE	TRUE
cg13911629	chr5	110075178	110075179	SLC25A46	91137	1315	CGI	FALSE	TRUE	FALSE
cg13912115	chr5	33936362	33936363	RXFP3	51289	-127	CGI	TRUE	FALSE	FALSE
cg13922021	chr5	76115974	76115975	F2RL1	2150	1140	CGI	FALSE	TRUE	FALSE
cg14135025	chr5	55776721	55776722	ANKRD55	79722	-247534	CGI	FALSE	FALSE	TRUE
cg14621323	chr5	176827161	176827162	PFN3	345456	474	CGI	TRUE	FALSE	FALSE
cg14827778	chr5	135266896	135266897	FBXL21	26223	889	CGI-S-Shore	FALSE	TRUE	FALSE
cg14854287	chr5	423894	423895	C5orf55	116349	19362	CGI-S-Shore	FALSE	TRUE	FALSE
cg14981610	chr5	1079057	1079058	MIR4635	100616479	-15967	CGI	FALSE	TRUE	FALSE
cg15037541	chr5	3394498	3394499	LOC285577	285577	141708	CGI	FALSE	FALSE	TRUE
cg15143268	chr5	14405920	14405921	FAM105A	54491	-175969	CGI	FALSE	TRUE	FALSE
cg15200711	chr5	1507775	1507776	LPCAT1	79888	16299	CGI-S-Shore	FALSE	TRUE	FALSE
cg15389068	chr5	140475049	140475050	PCDHB2	56133	811	CGI	TRUE	TRUE	FALSE
cg15421305	chr5	134385984	134385985	PITX1	5307	-16019	CGI	FALSE	TRUE	FALSE
cg15530916	chr5	2006086	2006087	IRX4	50805	-123205	CGI	FALSE	FALSE	TRUE
cg15833158	chr5	20305818	20305819	CDH18	1016	270162	CGI	FALSE	TRUE	FALSE
cg15954782	chr5	132113191	132113192	2008-09-01	23176	368	CGI	TRUE	TRUE	FALSE
cg16139202	chr5	134662788	134662789	H2AFY	9555	72787	CGI	FALSE	TRUE	FALSE
cg16272981	chr5	1489889	1489890	LPCAT1	79888	34185	CGI	FALSE	TRUE	FALSE
cg16358034	chr5	53815303	53815304	SNX18	112574	1713	CGI	TRUE	FALSE	FALSE
cg16392754	chr5	172388746	172388747	RPL26L1	51121	2306	CGI-S-Shore	FALSE	TRUE	FALSE
cg16443866	chr5	172756558	172756559	STC2	8614	-51	CGI	TRUE	FALSE	FALSE
cg16463100	chr5	176827833	176827834	PFN3	345456	-195	CGI-S-Shore	TRUE	FALSE	FALSE
cg16513905	chr5	137879008	137879009	ETF1	2107	-75	CGI	TRUE	FALSE	FALSE
cg16527418	chr5	98175367	98175368	FLJ35946	503569	-66578	CGI	FALSE	FALSE	TRUE
cg16622906	chr5	140529775	140529776	PCDHB6	56130	-62	CGI	TRUE	FALSE	FALSE
cg16662877	chr5	176943764	176943765	DDX41	51428	201	CGI	TRUE	TRUE	FALSE
cg17032533	chr5	175964269	175964270	RNF44	22838	755	CGI	TRUE	TRUE	FALSE
cg17045804	chr5	32710009	32710010	NPR3	4883	-732	CGI	TRUE	FALSE	FALSE
cg17054060	chr5	3606081	3606082	IRX1	79192	9912	CGI	FALSE	FALSE	TRUE
cg17480669	chr5	40835317	40835318	RPL37	6167	68	CGI	TRUE	FALSE	FALSE
cg17681524	chr5	21802422	21802423	PMCHL1	5369	-340037	Non-CGI	FALSE	TRUE	FALSE
cg17772342	chr5	134871686	134871687	NEUROG1	4762	-46	CGI	TRUE	FALSE	FALSE
cg17772763	chr5	6659801	6659802	SRD5A1	6715	26300	Non-CGI	FALSE	TRUE	FALSE
cg17870484	chr5	2515708	2515709	IRX2	153572	236059	CGI	FALSE	FALSE	TRUE
cg17946497	chr5	172198141	172198142	DUSP1	1843	60	CGI	TRUE	FALSE	FALSE
cg17977795	chr5	55290997	55290998	IL6ST	3572	-175	CGI	TRUE	FALSE	FALSE
cg18045973	chr5	3269604	3269605	LOC285577	285577	266602	CGI-N-Shore	FALSE	FALSE	TRUE
cg18101138	chr5	4942469	4942470	LOC340094	340094	-92001	CGI	FALSE	FALSE	TRUE
cg18328894	chr5	175224563	175224564	CPLX2	10814	952	CGI	FALSE	TRUE	FALSE
cg18487598	chr5	178735372	178735373	ADAMTS2	9509	37057	CGI	FALSE	TRUE	FALSE
cg18710053	chr5	126409061	126409062	C5orf63	401207	121	CGI-N-Shore	FALSE	TRUE	FALSE
cg18869404	chr5	76937348	76937349	OTP	23440	-2825	CGI	FALSE	FALSE	TRUE
cg19021412	chr5	2103257	2103258	IRX4	50805	-220376	CGI	FALSE	FALSE	TRUE
cg19023046	chr5	93446954	93446955	FAM172A	83989	448	CGI	FALSE	TRUE	FALSE
cg19026977	chr5	172999989	172999990	LOC285593	285593	-6655	CGI-N-Shore	FALSE	FALSE	TRUE
cg19075208	chr5	94890810	94890811	ARSK	153642	-13	CGI	TRUE	FALSE	FALSE
cg19426594	chr5	490116	490117	PP7080	25845	-17035	CGI-S-Shore	FALSE	TRUE	FALSE
cg19581963	chr5	177708528	177708529	AGXT2L2	85007	-48724	CGI	FALSE	TRUE	FALSE
cg19606356	chr5	86563843	86563844	RASA1	5921	-225	CGI	TRUE	FALSE	FALSE
cg19837938	chr5	23507458	23507459	PRDM9	56979	-264	CGI	TRUE	FALSE	FALSE
cg20455854	chr5	139040849	139040850	CXXC5	51523	12547	CGI	FALSE	TRUE	FALSE
cg20683802	chr5	172982489	172982490	LOC285593	285593	-24155	CGI	FALSE	FALSE	TRUE
cg20970354	chr5	176202215	176202216	UNC5A	90249	-35343	Non-CGI	FALSE	FALSE	TRUE
cg21043815	chr5	134241104	134241105	PCBD2	84105	293	CGI	FALSE	TRUE	FALSE
cg21050001	chr5	36662804	36662805	SLC1A3	6507	56346	CGI	FALSE	TRUE	FALSE
cg21101222	chr5	151138161	151138162	ATOX1	475	47	CGI	TRUE	FALSE	FALSE
cg21144714	chr5	149829517	149829518	RPS14	6208	-197	CGI	TRUE	FALSE	FALSE
cg21489753	chr5	137667158	137667159	FAM53C	51307	-6064	CGI	TRUE	TRUE	FALSE
cg21638645	chr5	1800072	1800073	MRPL36	64979	-115	CGI	TRUE	FALSE	FALSE
cg21799206	chr5	10563665	10563666	ANKRD33B	651746	-768	CGI	TRUE	FALSE	FALSE
cg21901643	chr5	160973008	160973009	GABRB2	2561	2120	CGI-N-Shore	FALSE	TRUE	FALSE
cg22001924	chr5	162887193	162887194	NUDCD2	134492	-49	CGI	TRUE	FALSE	FALSE
cg22054885	chr5	23507450	23507451	PRDM9	56979	-272	CGI	TRUE	FALSE	FALSE
cg22134370	chr5	784832	784833	ZDHHC11	79844	66267	CGI	FALSE	FALSE	TRUE
cg22160448	chr5	170734856	170734857	TLX3	30012	-1430	CGI-N-Shore	TRUE	FALSE	FALSE
cg22165524	chr5	1213187	1213188	SLC6A19	340024	11476	CGI-S-Shore	FALSE	TRUE	FALSE
cg22425359	chr5	2415878	2415879	IRX2	153572	335889	CGI	FALSE	FALSE	TRUE
cg22686881	chr5	170737255	170737256	TLX3	30012	966	CGI	TRUE	TRUE	FALSE
cg22702334	chr5	155061	155062	PLEKHG4B	153478	14687	CGI-N-Shore	FALSE	TRUE	FALSE
cg22905511	chr5	126409198	126409199	C5orf63	401207	-13	CGI	TRUE	FALSE	FALSE
cg23130957	chr5	1657346	1657347	LOC728613	728613	-23225	CGI-S-Shelf	FALSE	FALSE	TRUE
cg23243652	chr5	72921812	72921813	ARHGEF28	64283	-169	CGI	TRUE	FALSE	FALSE
cg23256297	chr5	123987523	123987524	ZNF608	57507	96975	CGI	FALSE	TRUE	FALSE
cg23279355	chr5	78985592	78985593	CMYA5	202333	-65	CGI	TRUE	FALSE	FALSE
cg23408285	chr5	135210551	135210552	IL9	3578	20963	Non-CGI	FALSE	TRUE	FALSE
cg23421262	chr5	121647546	121647547	SNCAIP	9627	159	CGI	TRUE	TRUE	FALSE
cg23949969	chr5	180219412	180219413	MGAT1	4245	23127	CGI	TRUE	TRUE	FALSE
cg24059022	chr5	1095923	1095924	SLC12A7	10723	16247	CGI-N-Shore	FALSE	TRUE	FALSE
cg24667575	chr5	172097064	172097065	NEURL1B	54492	28787	CGI	FALSE	TRUE	FALSE
cg24678700	chr5	76011138	76011139	F2R	2149	-728	CGI	TRUE	FALSE	FALSE
cg24756698	chr5	1020022	1020023	NKD2	85409	10853	CGI	FALSE	TRUE	FALSE
cg24833819	chr5	42924552	42924553	LOC648987	648987	94359	CGI	FALSE	FALSE	TRUE
cg24910410	chr5	180258265	180258266	LINC00847	729678	1305	CGI	TRUE	TRUE	FALSE
cg25097904	chr5	141736095	141736096	SPRY4	81848	-31474	CGI-N-Shore	FALSE	FALSE	TRUE
cg25224048	chr5	38467248	38467249	MIR3650	100500824	90413	CGI-N-Shore	FALSE	FALSE	TRUE
cg25346175	chr5	149737078	149737079	TCOF1	6949	-122	CGI	TRUE	FALSE	FALSE
cg25363885	chr5	146258463	146258464	PPP2R2B	5521	202589	CGI	TRUE	TRUE	FALSE
cg25472530	chr5	23507617	23507618	PRDM9	56979	-105	CGI	TRUE	FALSE	FALSE
cg25482900	chr5	167956911	167956912	FBLL1	345630	328	CGI	TRUE	FALSE	FALSE
cg25523087	chr5	76382975	76382976	ZBED3	84327	53	CGI	TRUE	TRUE	FALSE
cg25568703	chr5	8217236	8217237	LOC729506	729506	240439	Non-CGI	FALSE	FALSE	TRUE
cg25720804	chr5	170736389	170736390	TLX3	30012	100	CGI	TRUE	FALSE	FALSE
cg25923609	chr5	3607092	3607093	IRX1	79192	10923	CGI-S-Shore	FALSE	FALSE	TRUE
cg25930161	chr5	178551993	178551994	ZNF354C	30832	64385	CGI	FALSE	TRUE	FALSE
cg25962264	chr5	171433896	171433897	FBXW11	23291	-18	CGI	TRUE	FALSE	FALSE
cg26078244	chr5	1112110	1112111	SLC12A7	10723	60	CGI	TRUE	FALSE	FALSE
cg26101089	chr5	148724889	148724890	GRPEL2	134266	-86	CGI	TRUE	FALSE	FALSE
cg26161368	chr5	91018691	91018692	ARRDC3	57561	-339541	Non-CGI	FALSE	FALSE	TRUE
cg26317613	chr5	79784006	79784007	FAM151B	167555	205	CGI	FALSE	TRUE	FALSE
cg26327666	chr5	76937963	76937964	OTP	23440	-3440	CGI-S-Shore	FALSE	FALSE	TRUE
cg26353287	chr5	42954090	42954091	LOC648987	648987	64821	CGI-S-Shore	FALSE	FALSE	TRUE
cg26425305	chr5	3592526	3592527	IRX1	79192	-3640	CGI	FALSE	FALSE	TRUE
cg26446499	chr5	77253555	77253556	TBCA	6902	-181369	CGI	FALSE	FALSE	TRUE
cg26458142	chr5	22053875	22053876	PMCHL1	5369	-88584	Non-CGI	FALSE	TRUE	FALSE
cg26548492	chr5	135170171	135170172	SLC25A48	153328	-192	CGI-N-Shore	TRUE	FALSE	FALSE
cg26552361	chr5	172293806	172293807	ERGIC1	57222	32582	Non-CGI	TRUE	TRUE	FALSE
cg26619047	chr5	139028068	139028069	CXXC5	51523	-231	CGI	TRUE	FALSE	FALSE
cg26665016	chr5	1170868	1170869	SLC6A19	340024	-30840	CGI	FALSE	FALSE	TRUE
cg26720682	chr5	1325111	1325112	MIR4457	100616235	-15618	CGI	FALSE	TRUE	FALSE
cg26789779	chr5	37839943	37839944	GDNF	2668	-160	CGI	TRUE	FALSE	FALSE
cg26986928	chr5	3059243	3059244	C5orf38	153571	306980	CGI	FALSE	FALSE	TRUE
cg26993466	chr5	1546899	1546900	LPCAT1	79888	-22822	CGI-N-Shore	FALSE	FALSE	TRUE
cg27009633	chr5	126366552	126366553	MARCH3	115123	-111	CGI	TRUE	FALSE	FALSE
cg27011712	chr5	52856452	52856453	NDUFS4	4724	-11	CGI	TRUE	FALSE	FALSE
cg27057288	chr5	175843241	175843242	CLTB	1212	297	CGI	TRUE	FALSE	FALSE
cg27090289	chr5	179290641	179290642	C5orf45	51149	-4800	CGI-N-Shore	FALSE	TRUE	FALSE
cg27097438	chr5	126409153	126409154	C5orf63	401207	29	CGI	TRUE	FALSE	FALSE
cg27649348	chr5	42944030	42944031	LOC648987	648987	74881	CGI-N-Shore	FALSE	FALSE	TRUE
cg00005083	chr6	46655543	46655544	TDRD6	221400	-67	CGI	TRUE	FALSE	FALSE
cg00084338	chr6	170595920	170595921	DLL1	28514	3775	CGI	FALSE	TRUE	FALSE
cg00098819	chr6	168615442	168615443	DACT2	168002	104958	CGI	FALSE	FALSE	TRUE
cg00115458	chr6	33141305	33141306	COL11A2	1302	18938	Non-CGI	FALSE	TRUE	FALSE
cg00175859	chr6	138428631	138428632	PERP	64065	27	CGI	TRUE	FALSE	FALSE
cg00186529	chr6	170452864	170452865	LOC154449	154449	118791	CGI	FALSE	FALSE	TRUE
cg00355613	chr6	32064956	32064957	TNXB	7148	20513	CGI	FALSE	TRUE	FALSE
cg00366934	chr6	135503837	135503838	MYB	4602	1383	CGI-S-Shore	FALSE	TRUE	FALSE
cg00406022	chr6	31691696	31691697	C6orf25	80739	574	CGI	FALSE	TRUE	FALSE
cg00512454	chr6	36709214	36709215	CDKN1A	1026	64976	Non-CGI	FALSE	TRUE	FALSE
cg00613752	chr6	110300308	110300309	GPR6	2830	9	CGI	TRUE	TRUE	FALSE
cg00678158	chr6	30538836	30538837	ABCF1	23	-332	CGI	TRUE	FALSE	FALSE
cg00722097	chr6	111195976	111195977	CDK19	23097	-59138	CGI	TRUE	TRUE	FALSE
cg00956573	chr6	32940570	32940571	BRD2	6046	4132	CGI	TRUE	TRUE	FALSE
cg00991794	chr6	125284212	125284213	STL	7955	-38	CGI	TRUE	FALSE	FALSE
cg01070355	chr6	24126330	24126331	NRSN1	140767	-82	CGI-N-Shore	TRUE	FALSE	FALSE
cg01170201	chr6	32820976	32820977	TAP1	6890	770	CGI	TRUE	FALSE	FALSE
cg01380710	chr6	46459138	46459139	RCAN2	10231	664	CGI	TRUE	TRUE	FALSE
cg01509330	chr6	170535724	170535725	LOC154449	154449	35931	CGI	FALSE	FALSE	TRUE
cg01516851	chr6	28945338	28945339	ZNF311	282890	27753	CGI	FALSE	FALSE	TRUE
cg01536956	chr6	33165577	33165578	SLC39A7	7922	-3024	CGI-N-Shelf	TRUE	TRUE	FALSE
cg01668653	chr6	35733710	35733711	CLPSL2	389383	-10680	CGI	FALSE	FALSE	TRUE
cg01696603	chr6	125623444	125623445	HDDC2	51020	-161	CGI-S-Shore	TRUE	FALSE	FALSE
cg01748414	chr6	2698014	2698015	MYLK4	340156	53138	Non-CGI	FALSE	TRUE	FALSE
cg01769908	chr6	42665741	42665742	PRPH2	5961	24615	Non-CGI	FALSE	TRUE	FALSE
cg01927730	chr6	168955764	168955765	SMOC2	64094	113932	CGI-S-Shore	FALSE	TRUE	FALSE
cg02145102	chr6	31276418	31276419	HLA-C	3107	-36504	CGI	FALSE	TRUE	FALSE
cg02196294	chr6	39197260	39197261	KCNK5	8645	-8	CGI	TRUE	FALSE	FALSE
cg02266771	chr6	27218966	27218967	PRSS16	10279	3463	CGI	TRUE	TRUE	FALSE
cg02285791	chr6	27550747	27550748	ZNF184	7738	-109849	CGI	FALSE	FALSE	TRUE
cg02524205	chr6	167559851	167559852	GPR31	2853	11466	CGI-N-Shore	FALSE	FALSE	TRUE
cg02631680	chr6	44094852	44094853	MRPL14	64928	337	CGI	TRUE	TRUE	FALSE
cg02712746	chr6	13574844	13574845	SIRT5	23408	82	CGI	TRUE	FALSE	FALSE
cg02740007	chr6	164506581	164506582	QKI	9444	670905	CGI-S-Shore	FALSE	FALSE	TRUE
cg02766845	chr6	28956577	28956578	ZNF311	282890	16514	CGI	TRUE	FALSE	FALSE
cg02816367	chr6	112081490	112081491	FYN	2534	113163	Non-CGI	TRUE	TRUE	FALSE
cg02846841	chr6	28945341	28945342	ZNF311	282890	27750	CGI	FALSE	FALSE	TRUE
cg02964065	chr6	32729545	32729546	HLA-DQB2	3120	1783	CGI	FALSE	TRUE	FALSE
cg03228602	chr6	7888995	7888996	TXNDC5	81567	22050	CGI	FALSE	TRUE	FALSE
cg03252829	chr6	39282164	39282165	KCNK17	89822	71	CGI	TRUE	FALSE	FALSE
cg03265892	chr6	142468362	142468363	VTA1	51534	-46	CGI	TRUE	FALSE	FALSE
cg03338924	chr6	13015106	13015107	LOC100130357	100130357	280710	CGI	FALSE	TRUE	FALSE
cg03354771	chr6	36646473	36646474	CDKN1A	1026	2235	CGI	TRUE	TRUE	FALSE
cg03400828	chr6	44310324	44310325	AARS2	57505	-29260	CGI	TRUE	TRUE	FALSE
cg03527422	chr6	99282736	99282737	POU3F2	5454	155	CGI	TRUE	FALSE	FALSE
cg03560996	chr6	31733908	31733909	VWA7	80737	11198	CGI	FALSE	TRUE	FALSE
cg03562759	chr6	33132611	33132612	COL11A2	1302	27632	CGI-S-Shelf	FALSE	TRUE	FALSE
cg03605610	chr6	41394765	41394766	NCR2	9436	91236	CGI	FALSE	FALSE	TRUE
cg03671443	chr6	28891045	28891046	TRIM27	5987	721	CGI	TRUE	FALSE	FALSE
cg03680932	chr6	16306683	16306684	GMPR	2766	67871	CGI	FALSE	TRUE	FALSE
cg03897425	chr6	169224956	169224957	SMOC2	64094	383124	CGI-N-Shore	FALSE	FALSE	TRUE
cg03980370	chr6	139117543	139117544	ECT2L	345930	294	CGI-S-Shore	FALSE	TRUE	FALSE
cg04112181	chr6	168680286	168680287	DACT2	168002	40114	CGI	FALSE	FALSE	TRUE
cg04136781	chr6	32129786	32129787	EGFL8	80864	-2594	Non-CGI	FALSE	TRUE	FALSE
cg04186657	chr6	29690893	29690894	HLA-F	3134	-222	CGI-N-Shore	TRUE	FALSE	FALSE
cg04246357	chr6	158589294	158589295	SERAC1	84947	16	CGI	TRUE	FALSE	FALSE
cg04254454	chr6	26123398	26123399	HIST1H2BC	8347	732	CGI	TRUE	TRUE	FALSE
cg04406910	chr6	31926623	31926624	SKIV2L	6499	41	CGI	TRUE	TRUE	FALSE
cg04471092	chr6	169246889	169246890	SMOC2	64094	405057	CGI	FALSE	FALSE	TRUE
cg04505252	chr6	15244745	15244746	JARID2	3720	-987	CGI	TRUE	FALSE	FALSE
cg04543938	chr6	28956426	28956427	ZNF311	282890	16665	CGI	TRUE	FALSE	FALSE
cg04650654	chr6	28505429	28505430	GPX5	2880	11639	CGI	TRUE	FALSE	FALSE
cg04695233	chr6	1766129	1766130	FOXC1	2296	155447	CGI	FALSE	TRUE	FALSE
cg04766529	chr6	137144557	137144558	PEX7	5191	854	CGI-S-Shore	FALSE	TRUE	FALSE
cg04806553	chr6	36651994	36651995	CDKN1A	1026	7756	CGI	FALSE	TRUE	FALSE
cg04851935	chr6	46703193	46703194	PLA2G7	7941	235	CGI	TRUE	TRUE	FALSE
cg04947136	chr6	20032627	20032628	MBOAT1	154141	180041	CGI	FALSE	FALSE	TRUE
cg05085230	chr6	133562461	133562462	EYA4	2070	724	CGI	TRUE	TRUE	FALSE
cg05103992	chr6	159290440	159290441	OSTCP1	202459	-11775	CGI-N-Shore	FALSE	FALSE	TRUE
cg05209770	chr6	89827644	89827645	SRSF12	135295	154	CGI	TRUE	FALSE	FALSE
cg05225634	chr6	156718288	156718289	ARID1B	57492	-380774	CGI	FALSE	FALSE	TRUE
cg05371064	chr6	119671176	119671177	MAN1A1	4121	-249	CGI	TRUE	FALSE	FALSE
cg05482498	chr6	28866178	28866179	TRIM27	5987	25588	CGI-S-Shore	FALSE	FALSE	TRUE
cg05583848	chr6	35265411	35265412	DEF6	50619	-182	CGI-N-Shore	TRUE	FALSE	FALSE
cg05667097	chr6	31691481	31691482	C6orf25	80739	359	CGI	TRUE	TRUE	FALSE
cg05796763	chr6	33422910	33422911	ZBTB9	221504	553	CGI-S-Shore	TRUE	TRUE	FALSE
cg05877222	chr6	156952186	156952187	ARID1B	57492	-146876	CGI	FALSE	FALSE	TRUE
cg05943655	chr6	43636172	43636173	MRPS18A	55168	19375	Non-CGI	FALSE	TRUE	FALSE
cg06099048	chr6	32164151	32164152	GPSM3	63940	-850	CGI	TRUE	TRUE	FALSE
cg06140764	chr6	30539234	30539235	ABCF1	23	63	CGI	TRUE	FALSE	FALSE
cg06421138	chr6	111750934	111750935	TRAF3IP2-AS1	643749	-53739	Non-CGI	FALSE	TRUE	FALSE
cg06500074	chr6	14844874	14844875	JARID2	3720	-400858	CGI	FALSE	FALSE	TRUE
cg06531476	chr6	170525018	170525019	LOC154449	154449	46637	CGI-N-Shelf	FALSE	FALSE	TRUE
cg06590170	chr6	33969828	33969829	MIR1275	100302123	-1999	CGI	TRUE	FALSE	FALSE
cg06642177	chr6	134496341	134496342	HMGA1P7	387065	-57522	CGI	TRUE	TRUE	FALSE
cg06739029	chr6	19837421	19837422	ID4	3400	-194	CGI	TRUE	FALSE	FALSE
cg06824988	chr6	31852982	31852983	SLC44A4	80736	-6158	CGI-S-Shore	TRUE	TRUE	FALSE
cg06924241	chr6	43613395	43613396	RSPH9	221421	627	CGI-S-Shore	FALSE	TRUE	FALSE
cg07014308	chr6	31691597	31691598	C6orf25	80739	475	CGI	FALSE	TRUE	FALSE
cg07094194	chr6	31130273	31130274	TCF19	6941	3969	CGI-S-Shelf	FALSE	TRUE	FALSE
cg07124687	chr6	28956332	28956333	ZNF311	282890	16759	CGI	TRUE	FALSE	FALSE
cg07143470	chr6	56111812	56111813	COL21A1	81578	147078	CGI-N-Shore	FALSE	TRUE	FALSE
cg07182669	chr6	2903535	2903536	SERPINB9	5272	8	CGI	TRUE	FALSE	FALSE
cg07250080	chr6	32822278	32822279	PSMB9	5698	339	CGI	TRUE	TRUE	FALSE
cg07281125	chr6	166984691	166984692	MIR1913	100302141	-61769	CGI	FALSE	TRUE	FALSE
cg07310318	chr6	150185595	150185596	LRP11	84918	-114	CGI	TRUE	TRUE	FALSE
cg07434707	chr6	91296135	91296136	MAP3K7	6885	770	CGI-N-Shore	FALSE	TRUE	FALSE
cg07485685	chr6	35696061	35696062	FKBP5	2289	334	CGI	FALSE	TRUE	FALSE
cg07522416	chr6	39016326	39016327	GLP1R	2740	-229	CGI-N-Shore	TRUE	FALSE	FALSE
cg07562139	chr6	168147329	168147330	C6orf123	26238	50208	Non-CGI	FALSE	FALSE	TRUE
cg07608094	chr6	32134964	32134965	EGFL8	80864	2581	CGI	FALSE	TRUE	FALSE
cg07723322	chr6	31855434	31855435	SLC44A4	80736	-8610	CGI-N-Shore	FALSE	TRUE	FALSE
cg07898446	chr6	3849294	3849295	FAM50B	26240	-336	CGI	TRUE	FALSE	FALSE
cg07931783	chr6	49431133	49431134	CENPQ	55166	36	CGI	TRUE	FALSE	FALSE
cg08062329	chr6	30524553	30524554	PRR3	80742	66	CGI	TRUE	FALSE	FALSE
cg08180257	chr6	138483500	138483501	KIAA1244	57221	446	CGI	FALSE	TRUE	FALSE
cg08355568	chr6	7108248	7108249	RREB1	6239	417	CGI-S-Shore	TRUE	TRUE	FALSE
cg08377819	chr6	28956268	28956269	ZNF311	282890	16823	CGI	TRUE	FALSE	FALSE
cg08390760	chr6	28973318	28973319	ZNF311	282890	-224	CGI	TRUE	FALSE	FALSE
cg08392126	chr6	46459694	46459695	RCAN2	10231	108	CGI	TRUE	FALSE	FALSE
cg08660959	chr6	32044163	32044164	CYP21A2	1589	38069	CGI-N-Shelf	FALSE	TRUE	FALSE
cg08727218	chr6	87832318	87832319	CGA	1081	-27452	CGI	FALSE	FALSE	TRUE
cg08782481	chr6	27839916	27839917	HIST1H3I	8354	181	CGI	TRUE	FALSE	FALSE
cg08958294	chr6	146350131	146350132	GRM1	2911	1348	CGI	TRUE	TRUE	FALSE
cg08979319	chr6	100896055	100896056	SIM1	6492	16748	CGI	FALSE	TRUE	FALSE
cg08985785	chr6	39196340	39196341	KCNK5	8645	909	CGI	FALSE	TRUE	FALSE
cg09085041	chr6	166233021	166233022	PDE10A	10846	-157432	CGI	FALSE	TRUE	FALSE
cg09230467	chr6	31510163	31510164	DDX39B	7919	87	CGI	TRUE	TRUE	FALSE
cg09374123	chr6	150379008	150379009	ULBP3	79465	11273	CGI	FALSE	FALSE	TRUE
cg09427809	chr6	31804562	31804563	SNORD52	26797	-289	CGI-S-Shore	TRUE	TRUE	FALSE
cg09454230	chr6	166144656	166144657	PDE10A	10846	-69067	CGI	FALSE	FALSE	TRUE
cg09556826	chr6	28956259	28956260	ZNF311	282890	16832	CGI	TRUE	FALSE	FALSE
cg09682190	chr6	136571455	136571456	MTFR2	113115	-5	CGI	TRUE	FALSE	FALSE
cg09739413	chr6	32729498	32729499	HLA-DQB2	3120	1830	CGI	FALSE	TRUE	FALSE
cg09817162	chr6	27185676	27185677	PRSS16	10279	-29824	CGI	FALSE	FALSE	TRUE
cg09834205	chr6	150185198	150185199	LRP11	84918	280	CGI	TRUE	FALSE	FALSE
cg10099585	chr6	36853529	36853530	PPIL1	51645	-10728	CGI-N-Shore	TRUE	TRUE	FALSE
cg10135588	chr6	91004932	91004933	BACH2	60468	1693	CGI	FALSE	TRUE	FALSE
cg10169261	chr6	71122912	71122913	FAM135A	57579	-193	CGI	TRUE	FALSE	FALSE
cg10169971	chr6	83902988	83902989	RWDD2A	112611	-42	CGI	TRUE	TRUE	FALSE
cg10196102	chr6	30434311	30434312	HLA-E	3133	-22870	CGI-S-Shore	FALSE	FALSE	TRUE
cg10397527	chr6	32977217	32977218	HLA-DOA	3111	170	CGI-S-Shore	FALSE	TRUE	FALSE
cg10574148	chr6	135504383	135504384	MYB	4602	1929	CGI	FALSE	TRUE	FALSE
cg10601230	chr6	163289702	163289703	PARK2	5071	-140867	CGI	FALSE	TRUE	FALSE
cg10618979	chr6	150042818	150042819	LATS1	9113	-3425	CGI-S-Shelf	FALSE	FALSE	TRUE
cg10628782	chr6	31620229	31620230	APOM	55937	7	CGI	TRUE	FALSE	FALSE
cg10875454	chr6	7313615	7313616	SSR1	6745	-73	CGI	TRUE	FALSE	FALSE
cg10919664	chr6	28945322	28945323	ZNF311	282890	27769	CGI	FALSE	FALSE	TRUE
cg10941255	chr6	100677004	100677005	MCHR2	84539	-234889	CGI	FALSE	FALSE	TRUE
cg10963893	chr6	31670957	31670958	MIR4646	100616230	-2088	CGI	TRUE	TRUE	FALSE
cg11007366	chr6	18155579	18155580	KDM1B	221656	-38	CGI	TRUE	FALSE	FALSE
cg11012835	chr6	32821289	32821290	TAP1	6890	457	CGI	TRUE	FALSE	FALSE
cg11022236	chr6	564588	564589	HUS1B	135458	92374	CGI-S-Shore	FALSE	TRUE	FALSE
cg11111423	chr6	33290629	33290630	DAXX	1616	162	CGI	TRUE	TRUE	FALSE
cg11114063	chr6	147524085	147524086	STXBP5	134957	-1407	CGI	TRUE	TRUE	FALSE
cg11118422	chr6	28557883	28557884	SCAND3	114821	-2770	CGI	FALSE	TRUE	FALSE
cg11192541	chr6	30434109	30434110	HLA-E	3133	-23072	CGI	FALSE	FALSE	TRUE
cg11209988	chr6	31856189	31856190	EHMT2	10919	9273	CGI-N-Shore	FALSE	TRUE	FALSE
cg11251925	chr6	32166310	32166311	GPSM3	63940	-3009	CGI-S-Shore	TRUE	TRUE	FALSE
cg11315021	chr6	168580545	168580546	FRMD1	79981	-100705	CGI-N-Shore	FALSE	FALSE	TRUE
cg11322464	chr6	125475385	125475386	TPD52L1	7164	505	CGI	TRUE	TRUE	FALSE
cg11557932	chr6	4806305	4806306	CDYL	9425	99911	Non-CGI	FALSE	TRUE	FALSE
cg11569946	chr6	35227318	35227319	ZNF76	7629	631	CGI	TRUE	TRUE	FALSE
cg11579646	chr6	170390236	170390237	LOC154449	154449	181419	Non-CGI	FALSE	FALSE	TRUE
cg11637682	chr6	147124984	147124985	LOC729176	729176	-23	CGI	TRUE	TRUE	FALSE
cg11723406	chr6	160180425	160180426	ACAT2	39	-2562	CGI-N-Shelf	FALSE	FALSE	TRUE
cg11733430	chr6	33262740	33262741	RGL2	5863	4423	CGI-N-Shelf	FALSE	TRUE	FALSE
cg11772919	chr6	33245328	33245329	B3GALT4	8705	410	CGI	TRUE	FALSE	FALSE
cg11801452	chr6	31869521	31869522	ZBTB12	221527	246	CGI	TRUE	TRUE	FALSE
cg12086421	chr6	68535378	68535379	BAI3	577	-810252	CGI	FALSE	FALSE	TRUE
cg12177182	chr6	168918116	168918117	SMOC2	64094	76284	CGI	FALSE	TRUE	FALSE
cg12291586	chr6	149813417	149813418	ZC3H12D	340152	-7268	CGI	FALSE	FALSE	TRUE
cg12349884	chr6	27106988	27106989	HIST1H4I	8294	-98	CGI-N-Shore	TRUE	TRUE	FALSE
cg12588917	chr6	29692082	29692083	HLA-F	3134	964	CGI	FALSE	TRUE	FALSE
cg12745203	chr6	40722429	40722430	LRFN2	57497	-167302	CGI-N-Shore	FALSE	FALSE	TRUE
cg12835524	chr6	35109485	35109486	TCP11	6954	-297	CGI	TRUE	FALSE	FALSE
cg12910494	chr6	150262965	150262966	ULBP2	80328	-169	CGI	TRUE	FALSE	FALSE
cg12927641	chr6	109611667	109611668	CCDC162P	221262	-3837	CGI	FALSE	FALSE	TRUE
cg12963312	chr6	52441723	52441724	TRAM2	9697	137	CGI	TRUE	FALSE	FALSE
cg12967914	chr6	30043106	30043107	RNF39	80352	520	CGI	TRUE	FALSE	FALSE
cg13225750	chr6	31744033	31744034	VWA7	80737	1073	CGI-S-Shore	FALSE	TRUE	FALSE
cg13250324	chr6	170591863	170591864	DLL1	28514	7832	CGI	FALSE	TRUE	FALSE
cg13268374	chr6	33282313	33282314	TAPBP	6892	-148	CGI	TRUE	TRUE	FALSE
cg13289019	chr6	3849350	3849351	FAM50B	26240	-280	CGI	TRUE	FALSE	FALSE
cg13297865	chr6	80657415	80657416	ELOVL4	6785	-99	CGI	TRUE	FALSE	FALSE
cg13307058	chr6	134497542	134497543	HMGA1P7	387065	-58723	CGI	TRUE	TRUE	FALSE
cg13371788	chr6	117586817	117586818	VGLL2	245806	95	CGI	TRUE	FALSE	FALSE
cg13435432	chr6	108489292	108489293	NR2E1	7101	2076	CGI	FALSE	TRUE	FALSE
cg13477849	chr6	97345728	97345729	NDUFAF4	29078	37	CGI	TRUE	FALSE	FALSE
cg13666253	chr6	109169484	109169485	ARMC2	84071	-133	CGI	TRUE	FALSE	FALSE
cg13726504	chr6	10884706	10884707	GCM2	9247	-2607	CGI-S-Shore	FALSE	TRUE	FALSE
cg13934406	chr6	32120878	32120879	PRRT1	80863	-17	CGI	TRUE	TRUE	FALSE
cg13991849	chr6	45390099	45390100	SUPT3H	8464	-44428	CGI	TRUE	TRUE	FALSE
cg14099160	chr6	108280315	108280316	SEC63	11231	-832	CGI-S-Shore	TRUE	FALSE	FALSE
cg14186641	chr6	88876741	88876742	CNR1	1268	-973	CGI	TRUE	FALSE	FALSE
cg14203970	chr6	155363859	155363860	TIAM2	26230	210027	Non-CGI	FALSE	TRUE	FALSE
cg14436871	chr6	39759955	39759956	DAAM2	23500	-202	CGI-N-Shore	TRUE	FALSE	FALSE
cg14441480	chr6	32729500	32729501	HLA-DQB2	3120	1828	CGI	FALSE	TRUE	FALSE
cg14536697	chr6	32291368	32291369	C6orf10	10665	48286	Non-CGI	FALSE	TRUE	FALSE
cg14999947	chr6	33422918	33422919	ZBTB9	221504	561	CGI-S-Shore	TRUE	TRUE	FALSE
cg15026241	chr6	28784980	28784981	LOC401242	401242	46472	CGI	FALSE	FALSE	TRUE
cg15226275	chr6	116381976	116381977	FRK	2444	-54	Non-CGI	TRUE	FALSE	FALSE
cg15401922	chr6	157802439	157802440	ZDHHC14	79683	-116	CGI	TRUE	FALSE	FALSE
cg15409746	chr6	136610914	136610915	BCLAF1	9774	73	CGI	TRUE	FALSE	FALSE
cg15420785	chr6	34216928	34216929	C6orf1	221491	-23	CGI	TRUE	FALSE	FALSE
cg15553989	chr6	64346784	64346785	PHF3	23469	1058	CGI	FALSE	TRUE	FALSE
cg15572180	chr6	30689205	30689206	TUBB	203068	1047	CGI	TRUE	TRUE	FALSE
cg15599146	chr6	157802928	157802929	ZDHHC14	79683	370	CGI	TRUE	FALSE	FALSE
cg15649774	chr6	31515286	31515287	NFKBIL1	4795	657	Non-CGI	TRUE	TRUE	FALSE
cg15659132	chr6	26577336	26577337	ABT1	29777	-19833	CGI	TRUE	FALSE	FALSE
cg15866928	chr6	32134512	32134513	EGFL8	80864	2129	CGI	FALSE	TRUE	FALSE
cg15923936	chr6	91318412	91318413	MAP3K7	6885	-21504	CGI-N-Shore	FALSE	FALSE	TRUE
cg15971980	chr6	150254442	150254443	ULBP2	80328	-8692	Non-CGI	TRUE	FALSE	FALSE
cg15977685	chr6	168743593	168743594	DACT2	168002	-23190	CGI-N-Shelf	FALSE	FALSE	TRUE
cg16108230	chr6	117584815	117584816	VGLL2	245806	-1904	CGI-S-Shore	TRUE	FALSE	FALSE
cg16416464	chr6	32037735	32037736	CYP21A2	1589	31641	CGI	FALSE	TRUE	FALSE
cg16493566	chr6	153304236	153304237	FBXO5	26271	502	CGI	TRUE	TRUE	FALSE
cg16570995	chr6	37138163	37138164	PIM1	5292	240	CGI	TRUE	FALSE	FALSE
cg16668921	chr6	107077373	107077374	QRSL1	55278	-66	CGI	TRUE	TRUE	FALSE
cg16716345	chr6	34216949	34216950	C6orf1	221491	-44	CGI	TRUE	FALSE	FALSE
cg16901727	chr6	47221087	47221088	TNFRSF21	27242	56591	Non-CGI	FALSE	TRUE	FALSE
cg17037491	chr6	25280491	25280492	LRRC16A	55604	834	CGI	FALSE	TRUE	FALSE
cg17093809	chr6	125474841	125474842	TPD52L1	7164	-36	CGI	TRUE	FALSE	FALSE
cg17094014	chr6	41605343	41605344	MDFI	4188	-850	CGI	TRUE	FALSE	FALSE
cg17177454	chr6	31940406	31940407	DOM3Z	1797	-373	CGI	TRUE	TRUE	FALSE
cg17247293	chr6	168197921	168197922	C6orf123	26238	-381	CGI	TRUE	FALSE	FALSE
cg17330295	chr6	31747026	31747027	VWA7	80737	-1917	CGI	TRUE	TRUE	FALSE
cg17502394	chr6	43251710	43251711	SLC22A7	10864	-14286	CGI	TRUE	TRUE	FALSE
cg17549725	chr6	163712522	163712523	PACRG-AS1	285796	32981	CGI	FALSE	TRUE	FALSE
cg17569438	chr6	29768230	29768231	HCG4	54435	-7379	CGI	FALSE	FALSE	TRUE
cg17615061	chr6	31620208	31620209	APOM	55937	-11	CGI	TRUE	FALSE	FALSE
cg17627829	chr6	30292258	30292259	TRIM39	56658	-1996	CGI-N-Shore	TRUE	TRUE	FALSE
cg17642201	chr6	159549216	159549217	FNDC1	84624	-41211	CGI-N-Shore	FALSE	FALSE	TRUE
cg17754510	chr6	10391412	10391413	LOC100130275	100130275	-21137	CGI	FALSE	FALSE	TRUE
cg17767659	chr6	41888922	41888923	BYSL	705	-41	CGI	TRUE	FALSE	FALSE
cg17828223	chr6	153304819	153304820	FBXO5	26271	-78	CGI	TRUE	FALSE	FALSE
cg17949403	chr6	3299629	3299630	PSMG4	389362	40466	Non-CGI	FALSE	TRUE	FALSE
cg18269503	chr6	26104560	26104561	HIST1H4C	8364	383	CGI-S-Shore	TRUE	FALSE	FALSE
cg18338863	chr6	114178495	114178496	MARCKS	4082	-30	CGI	TRUE	FALSE	FALSE
cg18347921	chr6	29975366	29975367	HCG9	10255	32473	CGI	FALSE	TRUE	FALSE
cg18425786	chr6	142410235	142410236	NMBR	4829	-298	CGI-S-Shore	TRUE	FALSE	FALSE
cg18445760	chr6	31837445	31837446	NEU1	4758	-6735	Non-CGI	FALSE	TRUE	FALSE
cg18455405	chr6	16306552	16306553	GMPR	2766	67740	CGI-S-Shore	FALSE	TRUE	FALSE
cg18582581	chr6	144471433	144471434	STX11	8676	-219	CGI	TRUE	FALSE	FALSE
cg18588052	chr6	111408752	111408753	SLC16A10	117247	-27	CGI	TRUE	FALSE	FALSE
cg18630125	chr6	14677373	14677374	CD83	9308	559885	Non-CGI	FALSE	FALSE	TRUE
cg18640564	chr6	90142888	90142889	ANKRD6	22881	-7	CGI	TRUE	FALSE	FALSE
cg18729896	chr6	31126345	31126346	TCF19	6941	41	CGI	TRUE	FALSE	FALSE
cg18730387	chr6	31633303	31633304	CSNK2B	1460	-352	CGI	TRUE	TRUE	FALSE
cg18803104	chr6	28956324	28956325	ZNF311	282890	16767	CGI	TRUE	FALSE	FALSE
cg18860790	chr6	84937415	84937416	KIAA1009	22832	-79	CGI	TRUE	FALSE	FALSE
cg19033035	chr6	128841969	128841970	PTPRK	5796	-98	CGI	TRUE	FALSE	FALSE
cg19082069	chr6	26018534	26018535	HIST1H1A	3024	-493	CGI-S-Shore	TRUE	FALSE	FALSE
cg19384531	chr6	50692252	50692253	TFAP2D	83741	10994	CGI	FALSE	TRUE	FALSE
cg19482086	chr6	160211437	160211438	MRPL18	29074	414	CGI	TRUE	TRUE	FALSE
cg19519310	chr6	1389367	1389368	FOXF2	2295	-700	CGI	TRUE	FALSE	FALSE
cg19592336	chr6	28129416	28129417	ZKSCAN8	7745	19699	CGI	TRUE	FALSE	FALSE
cg19681793	chr6	169651645	169651646	THBS2	7058	2490	CGI-S-Shelf	FALSE	TRUE	FALSE
cg19692318	chr6	131384600	131384601	EPB41L2	2037	-137	CGI	TRUE	FALSE	FALSE
cg19732154	chr6	32164558	32164559	GPSM3	63940	-1257	CGI	TRUE	TRUE	FALSE
cg19964491	chr6	32016236	32016237	CYP21A2	1589	10142	CGI	TRUE	TRUE	FALSE
cg19984781	chr6	30710898	30710899	FLOT1	10211	-444	CGI	TRUE	FALSE	FALSE
cg20148850	chr6	10422227	10422228	TFAP2A	7020	-2429	CGI	FALSE	FALSE	TRUE
cg20180370	chr6	50691003	50691004	TFAP2D	83741	9745	CGI-S-Shore	FALSE	TRUE	FALSE
cg20234976	chr6	100895907	100895908	SIM1	6492	16896	CGI	FALSE	TRUE	FALSE
cg20246315	chr6	30166614	30166615	TRIM26	7726	14655	CGI	TRUE	TRUE	FALSE
cg20419110	chr6	43478491	43478492	LRRC73	221424	-66	CGI	TRUE	FALSE	FALSE
cg20635821	chr6	18011761	18011762	KIF13A	63971	-23906	CGI	FALSE	FALSE	TRUE
cg20729891	chr6	110500390	110500391	WASF1	8936	815	CGI	TRUE	TRUE	FALSE
cg20755651	chr6	168841574	168841575	SMOC2	64094	-255	CGI	TRUE	FALSE	FALSE
cg20906291	chr6	10382103	10382104	LOC100130275	100130275	-30446	CGI	FALSE	FALSE	TRUE
cg20935933	chr6	143382018	143382019	AIG1	51390	1517	CGI	TRUE	TRUE	FALSE
cg21053741	chr6	31525861	31525862	NFKBIL1	4795	11232	Non-CGI	FALSE	TRUE	FALSE
cg21104965	chr6	117869453	117869454	GOPC	57120	54250	CGI	FALSE	TRUE	FALSE
cg21153898	chr6	29521788	29521789	UBD	10537	5912	CGI	FALSE	FALSE	TRUE
cg21156577	chr6	32163485	32163486	GPSM3	63940	-184	CGI	TRUE	TRUE	FALSE
cg21178851	chr6	160500620	160500621	LOC729603	729603	-13492	CGI-N-Shore	FALSE	TRUE	FALSE
cg21229979	chr6	163746175	163746176	PACRG-AS1	285796	-669	CGI-S-Shelf	TRUE	FALSE	FALSE
cg21234474	chr6	34204646	34204647	HMGA1	3159	68	CGI	TRUE	FALSE	FALSE
cg21506565	chr6	31691506	31691507	C6orf25	80739	384	CGI	TRUE	TRUE	FALSE
cg21574429	chr6	143381827	143381828	AIG1	51390	1326	CGI	TRUE	TRUE	FALSE
cg21620139	chr6	31691535	31691536	C6orf25	80739	413	CGI	FALSE	TRUE	FALSE
cg21668166	chr6	151125885	151125886	MTHFD1L	25902	-60928	Non-CGI	FALSE	TRUE	FALSE
cg21705063	chr6	108279337	108279338	SEC63	11231	143	CGI	TRUE	FALSE	FALSE
cg21825888	chr6	31670505	31670506	MIR4646	100616230	-1636	CGI-N-Shore	TRUE	TRUE	FALSE
cg21918786	chr6	109611834	109611835	CCDC162P	221262	-3670	CGI	FALSE	FALSE	TRUE
cg22036966	chr6	26183576	26183577	HIST1H2BE	8344	-446	CGI	TRUE	FALSE	FALSE
cg22235293	chr6	31691539	31691540	C6orf25	80739	417	CGI	FALSE	TRUE	FALSE
cg22237300	chr6	52171973	52171974	MCM3	4172	-22390	CGI	FALSE	FALSE	TRUE
cg22259126	chr6	32020750	32020751	CYP21A2	1589	14656	Non-CGI	FALSE	TRUE	FALSE
cg22389871	chr6	82463023	82463024	FAM46A	55603	-594	CGI	TRUE	FALSE	FALSE
cg22389949	chr6	152003038	152003039	ESR1	2099	-8591	CGI	FALSE	FALSE	TRUE
cg22401907	chr6	16353242	16353243	GMPR	2766	114430	CGI-N-Shore	FALSE	TRUE	FALSE
cg22685807	chr6	28945189	28945190	ZNF311	282890	27902	CGI	FALSE	FALSE	TRUE
cg22748740	chr6	28973350	28973351	ZNF311	282890	-256	CGI	TRUE	FALSE	FALSE
cg22827707	chr6	34100899	34100900	GRM4	2914	12968	Non-CGI	TRUE	TRUE	FALSE
cg23059700	chr6	36238213	36238214	PNPLA1	285848	27267	Non-CGI	TRUE	TRUE	FALSE
cg23076086	chr6	112194849	112194850	FYN	2534	-193	CGI	TRUE	FALSE	FALSE
cg23143796	chr6	33359770	33359771	KIFC1	3833	456	CGI	TRUE	FALSE	FALSE
cg23205538	chr6	162444494	162444495	PACRG	135138	-703668	Non-CGI	FALSE	TRUE	FALSE
cg23249710	chr6	117996544	117996545	NUS1	116150	-71	CGI	TRUE	FALSE	FALSE
cg23249717	chr6	167507105	167507106	GPR31	2853	64212	CGI	FALSE	TRUE	FALSE
cg23412900	chr6	136611125	136611126	BCLAF1	9774	-135	CGI	TRUE	FALSE	FALSE
cg23414861	chr6	74064064	74064065	DPPA5	340168	-64	CGI	TRUE	FALSE	FALSE
cg23493127	chr6	144164392	144164393	LTV1	84946	-114	CGI	TRUE	FALSE	FALSE
cg23664192	chr6	34725288	34725289	SNRPC	6631	416	CGI	TRUE	FALSE	FALSE
cg23752963	chr6	31502386	31502387	SNORD117	692233	1838	CGI-N-Shore	TRUE	TRUE	FALSE
cg23833452	chr6	146864752	146864753	RAB32	10981	-74	CGI	TRUE	FALSE	FALSE
cg23969311	chr6	45387257	45387258	SUPT3H	8464	-41586	CGI-N-Shore	FALSE	TRUE	FALSE
cg23997263	chr6	96462814	96462815	FUT9	10690	-1029	CGI-N-Shore	TRUE	FALSE	FALSE
cg24011531	chr6	114180173	114180174	MARCKS	4082	1645	CGI	FALSE	TRUE	FALSE
cg24039778	chr6	169632351	169632352	THBS2	7058	21784	CGI	FALSE	TRUE	FALSE
cg24123116	chr6	168704154	168704155	DACT2	168002	16246	CGI-N-Shelf	FALSE	FALSE	TRUE
cg24276787	chr6	30045068	30045069	RNF39	80352	-1439	CGI-S-Shore	TRUE	FALSE	FALSE
cg24363146	chr6	36515174	36515175	STK38	11329	71	CGI	TRUE	FALSE	FALSE
cg24376689	chr6	32016336	32016337	CYP21A2	1589	10242	CGI	TRUE	TRUE	FALSE
cg24444521	chr6	28104462	28104463	ZKSCAN8	7745	-5252	CGI-N-Shore	FALSE	TRUE	FALSE
cg24488218	chr6	33239779	33239780	VPS52	6293	-39	CGI	TRUE	FALSE	FALSE
cg24499517	chr6	111408763	111408764	SLC16A10	117247	-16	CGI	TRUE	FALSE	FALSE
cg24515095	chr6	31502471	31502472	SNORD117	692233	1753	CGI	TRUE	TRUE	FALSE
cg24627332	chr6	76059450	76059451	LOC100506804	100506804	64719	CGI-N-Shore	FALSE	TRUE	FALSE
cg24728018	chr6	123317875	123317876	CLVS2	134829	292	CGI	TRUE	FALSE	FALSE
cg24772267	chr6	72130742	72130743	LINC00472	79940	-293	CGI	TRUE	FALSE	FALSE
cg24845763	chr6	30172746	30172747	TRIM26	7726	8523	Non-CGI	TRUE	TRUE	FALSE
cg24847163	chr6	29600980	29600981	GABBR1	2550	-17	CGI	TRUE	FALSE	FALSE
cg24896692	chr6	18387562	18387563	RNF144B	255488	-17	CGI	TRUE	FALSE	FALSE
cg24966702	chr6	168720476	168720477	DACT2	168002	-73	CGI	TRUE	FALSE	FALSE
cg25051341	chr6	100061307	100061308	PRDM13	59336	6656	CGI	FALSE	TRUE	FALSE
cg25095032	chr6	31696423	31696424	DDAH2	23564	1614	CGI	FALSE	TRUE	FALSE
cg25147604	chr6	7540971	7540972	DSP	1832	-897	CGI	TRUE	FALSE	FALSE
cg25192717	chr6	33423156	33423157	ZBTB9	221504	799	CGI-S-Shore	TRUE	TRUE	FALSE
cg25267258	chr6	29274620	29274621	OR14J1	442191	152	Non-CGI	TRUE	FALSE	FALSE
cg25288068	chr6	28793681	28793682	LOC401242	401242	37771	CGI	FALSE	FALSE	TRUE
cg25374640	chr6	170599090	170599091	DLL1	28514	605	CGI	FALSE	TRUE	FALSE
cg25414597	chr6	166571880	166571881	T	6862	10249	CGI-N-Shore	FALSE	TRUE	FALSE
cg25460984	chr6	1608396	1608397	FOXC1	2296	-2283	CGI-S-Shore	FALSE	FALSE	TRUE
cg25472539	chr6	32037978	32037979	CYP21A2	1589	31884	CGI-S-Shore	FALSE	TRUE	FALSE
cg25689730	chr6	86303462	86303463	SNX14	57231	165	CGI	TRUE	TRUE	FALSE
cg25694032	chr6	164507164	164507165	QKI	9444	671488	CGI	FALSE	FALSE	TRUE
cg25946722	chr6	105307729	105307730	HACE1	57531	63	CGI	TRUE	FALSE	FALSE
cg26506725	chr6	31587990	31587991	PRRC2A	7916	-458	CGI	TRUE	FALSE	FALSE
cg26531923	chr6	24646364	24646365	KIAA0319	9856	17	CGI	TRUE	FALSE	FALSE
cg26723570	chr6	170102133	170102134	WDR27	253769	24	CGI	TRUE	FALSE	FALSE
cg26776742	chr6	117002360	117002361	KPNA5	3841	-5	CGI	TRUE	FALSE	FALSE
cg26870584	chr6	75914046	75914047	COL12A1	1303	1575	CGI	TRUE	TRUE	FALSE
cg27005847	chr6	31845879	31845880	SLC44A4	80736	942	CGI-N-Shore	TRUE	TRUE	FALSE
cg27149530	chr6	692947	692948	EXOC2	55770	160	CGI	FALSE	TRUE	FALSE
cg27158308	chr6	10838807	10838808	MAK	4117	-18	CGI	TRUE	TRUE	FALSE
cg27225990	chr6	3157784	3157785	TUBB2A	7280	0	CGI	TRUE	FALSE	FALSE
cg27311710	chr6	107349326	107349327	C6orf203	51250	-79	CGI	TRUE	FALSE	FALSE
cg27369307	chr6	73332843	73332844	KCNQ5	56479	1271	CGI	FALSE	TRUE	FALSE
cg27627038	chr6	475038	475039	IRF4	3662	83298	CGI-S-Shore	FALSE	FALSE	TRUE
cg00095859	chr7	1336729	1336730	UNCX	340260	64074	CGI	FALSE	FALSE	TRUE
cg00106345	chr7	27138396	27138397	HOTAIRM1	100506311	2682	CGI	FALSE	TRUE	FALSE
cg00111463	chr7	77137824	77137825	PTPN12	5782	-28947	CGI	FALSE	FALSE	TRUE
cg00120157	chr7	4349460	4349461	FOXK1	221937	-333926	CGI-S-Shore	FALSE	FALSE	TRUE
cg00129269	chr7	127228222	127228223	ARF5	381	-182	CGI	TRUE	FALSE	FALSE
cg00271522	chr7	1264195	1264196	UNCX	340260	-8457	CGI	FALSE	FALSE	TRUE
cg00350060	chr7	5821305	5821306	RNF216	54476	54	CGI	TRUE	FALSE	FALSE
cg00418216	chr7	27227847	27227848	HOXA11-AS	221883	2819	CGI	TRUE	TRUE	FALSE
cg00852675	chr7	150105086	150105087	LOC728743	728743	7295	CGI	FALSE	TRUE	FALSE
cg00870179	chr7	27219516	27219517	HOXA10-HOXA9	100534589	362	CGI	TRUE	FALSE	FALSE
cg00934312	chr7	149570931	149570932	ATP6V0E2-AS1	401431	18	CGI	TRUE	FALSE	FALSE
cg00943382	chr7	156786185	156786186	MNX1	3110	17160	CGI	FALSE	FALSE	TRUE
cg01078824	chr7	27220047	27220048	HOXA10-HOXA9	100534589	-166	CGI-S-Shore	TRUE	FALSE	FALSE
cg01104724	chr7	56297564	56297565	NUPR1L	389493	-113473	CGI	FALSE	FALSE	TRUE
cg01277155	chr7	103086237	103086238	SLC26A5	375611	385	CGI	FALSE	TRUE	FALSE
cg01426853	chr7	123673549	123673550	TMEM229A	730130	-25	CGI	TRUE	TRUE	FALSE
cg01455568	chr7	155261034	155261035	EN2	2020	10209	CGI	FALSE	FALSE	TRUE
cg01497501	chr7	1200135	1200136	ZFAND2A	90637	-279	CGI	TRUE	FALSE	FALSE
cg01580340	chr7	16891079	16891080	AGR3	155465	30532	CGI	FALSE	FALSE	TRUE
cg01624004	chr7	150745494	150745495	ASIC3	9311	-109	CGI-N-Shore	TRUE	FALSE	FALSE
cg01718447	chr7	30722327	30722328	INMT	11185	-15272	CGI	TRUE	TRUE	FALSE
cg01727302	chr7	24321351	24321352	NPY	4852	-2454	CGI-N-Shore	FALSE	FALSE	TRUE
cg01753241	chr7	1587459	1587460	TMEM184A	202915	8605	CGI	FALSE	TRUE	FALSE
cg01793704	chr7	130126024	130126025	MEST	4232	7	CGI-N-Shore	TRUE	FALSE	FALSE
cg01841651	chr7	105672016	105672017	SYPL1	6856	81039	Non-CGI	FALSE	TRUE	FALSE
cg01886004	chr7	1923613	1923614	MIR4655	100616160	-39723	CGI	FALSE	TRUE	FALSE
cg01889169	chr7	927986	927987	GET4	51608	36398	CGI	FALSE	TRUE	FALSE
cg02126753	chr7	44143998	44143999	AEBP1	165	37	CGI	TRUE	FALSE	FALSE
cg02482233	chr7	56031952	56031953	GBAS	2631	-316	CGI-N-Shore	TRUE	FALSE	FALSE
cg02661879	chr7	128470614	128470615	FLNC	2318	130	CGI	TRUE	FALSE	FALSE
cg02665399	chr7	611060	611061	FLJ44511	441307	51031	CGI	FALSE	TRUE	FALSE
cg02716317	chr7	3470434	3470435	SDK1	221935	129353	Non-CGI	FALSE	TRUE	FALSE
cg02869364	chr7	1081709	1081710	GPR146	115330	-15430	CGI	FALSE	TRUE	FALSE
cg02888048	chr7	98335163	98335164	NPTX2	4885	88565	Non-CGI	FALSE	FALSE	TRUE
cg02925800	chr7	102789617	102789618	NAPEPLD	222236	388	CGI	TRUE	TRUE	FALSE
cg02991118	chr7	4823955	4823956	MIR4656	100616465	4313	CGI	FALSE	TRUE	FALSE
cg03027977	chr7	138916033	138916034	UBN2	254048	-196	CGI	TRUE	FALSE	FALSE
cg03345106	chr7	43622578	43622579	STK17A	9263	-112	CGI	TRUE	FALSE	FALSE
cg03379100	chr7	128494225	128494226	ATP6V1F	9296	-8630	CGI	FALSE	TRUE	FALSE
cg03413097	chr7	156811422	156811423	LOC645249	645249	7870	CGI	FALSE	FALSE	TRUE
cg03644984	chr7	82286378	82286379	CACNA2D1	781	-213346	CGI	FALSE	FALSE	TRUE
cg03653726	chr7	2769253	2769254	AMZ1	155185	50089	CGI	FALSE	TRUE	FALSE
cg03729566	chr7	1059678	1059679	MIR339	442907	2982	CGI	FALSE	TRUE	FALSE
cg03771448	chr7	128431278	128431279	CCDC136	64753	-184	CGI	TRUE	FALSE	FALSE
cg03885264	chr7	73275316	73275317	WBSCR28	135886	-171	Non-CGI	TRUE	FALSE	FALSE
cg03899827	chr7	158905377	158905378	VIPR2	7434	32270	CGI	FALSE	TRUE	FALSE
cg03930209	chr7	156735466	156735467	NOM1	64434	-6949	CGI	FALSE	FALSE	TRUE
cg04005938	chr7	148334417	148334418	C7orf33	202865	46759	CGI	FALSE	FALSE	TRUE
cg04025965	chr7	150779110	150779111	FASTK	10922	-1158	CGI-S-Shore	TRUE	TRUE	FALSE
cg04109092	chr7	2647852	2647853	TTYH3	80727	-23749	CGI-S-Shore	FALSE	TRUE	FALSE
cg04149039	chr7	155249019	155249020	EN2	2020	-1803	CGI-S-Shore	TRUE	FALSE	FALSE
cg04258219	chr7	155142415	155142416	INSIG1	3638	52928	CGI	FALSE	FALSE	TRUE
cg04501438	chr7	21466669	21466670	SP4	6671	-1018	CGI	TRUE	FALSE	FALSE
cg04892724	chr7	4275784	4275785	FOXK1	221937	-407602	CGI	FALSE	TRUE	FALSE
cg04898026	chr7	149487677	149487678	SSPO	23145	14545	CGI	FALSE	TRUE	FALSE
cg05008927	chr7	856200	856201	SUN1	23353	1005	CGI	TRUE	TRUE	FALSE
cg05342467	chr7	2029732	2029733	MIR4655	100616160	-145842	CGI-S-Shore	FALSE	TRUE	FALSE
cg05369791	chr7	130131146	130131147	MESTIT1	317751	-132	CGI	TRUE	TRUE	FALSE
cg05398580	chr7	100816682	100816683	NAT16	375607	6873	CGI	FALSE	TRUE	FALSE
cg05637092	chr7	610887	610888	FLJ44511	441307	50858	CGI	FALSE	TRUE	FALSE
cg05967120	chr7	100064619	100064620	C7orf61	402573	-2724	Non-CGI	FALSE	TRUE	FALSE
cg05986417	chr7	157233209	157233210	DNAJB6	10049	103498	CGI	FALSE	FALSE	TRUE
cg06235000	chr7	116593769	116593770	ST7-OT4	338069	-182	CGI	TRUE	TRUE	FALSE
cg06239616	chr7	154705941	154705942	LOC100132707	100132707	-14284	CGI	FALSE	FALSE	TRUE
cg06324957	chr7	34118611	34118612	BMPER	168667	174087	CGI	FALSE	TRUE	FALSE
cg06332777	chr7	4118685	4118686	FOXK1	221937	-564701	CGI	FALSE	TRUE	FALSE
cg06368429	chr7	98778343	98778344	KPNA7	402569	26744	CGI-N-Shore	FALSE	TRUE	FALSE
cg06386408	chr7	150924450	150924451	ABCF2	10061	-132	CGI	TRUE	FALSE	FALSE
cg06471596	chr7	101579936	101579937	CUX1	1523	120751	Non-CGI	FALSE	TRUE	FALSE
cg06715976	chr7	27135769	27135770	HOTAIRM1	100506311	55	CGI	TRUE	FALSE	FALSE
cg06875413	chr7	130115737	130115738	MEST	4232	-10277	Non-CGI	FALSE	FALSE	TRUE
cg06887471	chr7	149157803	149157804	ZNF777	27153	248	CGI	FALSE	TRUE	FALSE
cg07063559	chr7	64043012	64043013	LOC641746	641746	23	CGI-N-Shore	TRUE	TRUE	FALSE
cg07067171	chr7	32996829	32996830	FKBP9	11328	-174	CGI	TRUE	TRUE	FALSE
cg07076816	chr7	38351154	38351155	TARP	445347	6433	CGI	FALSE	TRUE	FALSE
cg07084376	chr7	156336589	156336590	LINC00244	64433	3403	CGI	FALSE	FALSE	TRUE
cg07227743	chr7	154474113	154474114	LOC100132707	100132707	-246112	CGI-S-Shore	FALSE	TRUE	FALSE
cg07241084	chr7	47493388	47493389	TNS3	64759	128352	Non-CGI	FALSE	TRUE	FALSE
cg07241675	chr7	99067143	99067144	ATP5J2-PTCD1	100526740	-3318	CGI	TRUE	FALSE	FALSE
cg07300192	chr7	1903385	1903386	MIR4655	100616160	-19495	CGI-S-Shore	FALSE	TRUE	FALSE
cg07302677	chr7	128550862	128550863	KCP	375616	-88	CGI	TRUE	FALSE	FALSE
cg07476339	chr7	154706964	154706965	LOC100132707	100132707	-13261	CGI-S-Shore	FALSE	FALSE	TRUE
cg07525471	chr7	1332973	1332974	UNCX	340260	60318	CGI-S-Shore	FALSE	FALSE	TRUE
cg07552315	chr7	45431891	45431892	ADCY1	107	-181846	CGI	FALSE	FALSE	TRUE
cg07568298	chr7	129710119	129710120	KLHDC10	23008	-228	CGI-N-Shore	TRUE	FALSE	FALSE
cg07571734	chr7	151479894	151479895	PRKAG2-AS1	100505483	-94231	CGI-N-Shore	FALSE	TRUE	FALSE
cg07591089	chr7	140372755	140372756	ADCK2	90956	-196	CGI	TRUE	FALSE	FALSE
cg07681084	chr7	156685826	156685827	LMBR1	64327	74	CGI	TRUE	FALSE	FALSE
cg07838272	chr7	116164670	116164671	MET	4233	-147787	CGI	TRUE	TRUE	FALSE
cg07926691	chr7	38670987	38670988	AMPH	273	178	CGI	TRUE	FALSE	FALSE
cg07960450	chr7	45614300	45614301	ADCY1	107	560	CGI	TRUE	TRUE	FALSE
cg07969984	chr7	93204350	93204351	CALCR	799	-307	CGI	TRUE	FALSE	FALSE
cg08021734	chr7	1955141	1955142	MIR4655	100616160	-71251	CGI	FALSE	TRUE	FALSE
cg08101036	chr7	27153655	27153656	HOXA2	3199	-11260	CGI	FALSE	TRUE	FALSE
cg08142860	chr7	155089394	155089395	INSIG1	3638	-90	CGI	TRUE	FALSE	FALSE
cg08203284	chr7	27171528	27171529	HOXA4	3201	-1128	CGI-S-Shore	TRUE	FALSE	FALSE
cg08543278	chr7	1295706	1295707	UNCX	340260	23051	CGI	FALSE	FALSE	TRUE
cg08552401	chr7	99728793	99728794	MBLAC1	255374	4472	CGI	FALSE	FALSE	TRUE
cg08604097	chr7	8480865	8480866	NXPH1	30010	7279	CGI	FALSE	TRUE	FALSE
cg08627377	chr7	112095256	112095257	C7orf53	286006	-25650	CGI-S-Shelf	FALSE	TRUE	FALSE
cg08684580	chr7	98029266	98029267	BAIAP2L1	55971	1159	CGI-N-Shore	FALSE	TRUE	FALSE
cg08690634	chr7	158785469	158785470	LINC00689	154822	-15574	CGI	FALSE	FALSE	TRUE
cg08829140	chr7	101559608	101559609	CUX1	1523	100423	CGI	FALSE	TRUE	FALSE
cg08832624	chr7	98099917	98099918	BAIAP2L1	55971	-69489	CGI-N-Shore	FALSE	FALSE	TRUE
cg08832906	chr7	139208852	139208853	CLEC2L	154790	177	CGI	TRUE	FALSE	FALSE
cg09134205	chr7	154003215	154003216	DPP6	1804	418795	CGI	FALSE	TRUE	FALSE
[truncated: 19,910 more rows]
