# Supplementary material for: H3K4me1 marks DNA regions hypomethylated during aging in human stem and differentiated cells
Source: HighWire-hosted journal article supplement (doi:10.1101/gr.169011.113), 2014-09-30
Supplement: Supplemental_Table_17.xlsx [file Supplemental_Table_17.xlsx]

## Sheet: ST17
Supplemental Table 17: List of CpG sites where the Euclidean distance (ED) between MZ twins decreased (> 2-fold) with age
Target ID	Chromosome	start	end	nearest.gene	nearest.gene.id	disttotss	hmm.cpgi	prom.reg	intra.reg	inter.reg
cg00003202	chr1	151319512	151319513	RFX5	5993	255	CGI	FALSE	TRUE	FALSE
cg00007898	chr1	205180627	205180628	DSTYK	25778	98	CGI	TRUE	FALSE	FALSE
cg00021933	chr1	86082316	86082317	CYR61	3491	35871	CGI-S-Shore	FALSE	FALSE	TRUE
cg00097573	chr1	202830495	202830496	LOC148709	148709	-385	CGI	TRUE	TRUE	FALSE
cg00101986	chr1	25071756	25071757	CLIC4	25932	-2	CGI	TRUE	FALSE	FALSE
cg00114029	chr1	35351407	35351408	DLGAP3	58512	19575	CGI	FALSE	TRUE	FALSE
cg00115313	chr1	193029121	193029122	UCHL5	51377	114	CGI	TRUE	TRUE	FALSE
cg00173405	chr1	1335424	1335425	LOC148413	148413	513	CGI	TRUE	TRUE	FALSE
cg00309462	chr1	1840482	1840483	CALML6	163688	-5782	CGI	FALSE	FALSE	TRUE
cg00311883	chr1	235099120	235099121	SNORA14B	677802	192130	Non-CGI	FALSE	TRUE	FALSE
cg00325919	chr1	156595847	156595848	HAPLN2	60484	6760	CGI-S-Shore	FALSE	FALSE	TRUE
cg00347563	chr1	78511600	78511601	GIPC2	54810	10	CGI	TRUE	FALSE	FALSE
cg00354179	chr1	180881480	180881481	KIAA1614	57710	-831	CGI	TRUE	FALSE	FALSE
cg00396230	chr1	23037116	23037117	EPHB2	2048	-213	CGI	TRUE	FALSE	FALSE
cg00396407	chr1	226374726	226374727	ACBD3	64746	-302	CGI	TRUE	FALSE	FALSE
cg00543329	chr1	36235839	36235840	CLSPN	63967	-287	CGI-S-Shore	TRUE	FALSE	FALSE
cg00545681	chr1	95007593	95007594	F3	2152	-179	CGI	TRUE	FALSE	FALSE
cg00583535	chr1	201159906	201159907	IGFN1	91156	-45	Non-CGI	TRUE	FALSE	FALSE
cg00660251	chr1	89991016	89991017	LRRC8B	23507	618	CGI	FALSE	TRUE	FALSE
cg00687095	chr1	176176785	176176786	RFWD2	64326	-414	CGI	TRUE	FALSE	FALSE
cg00757789	chr1	27560710	27560711	WDTC1	23038	-295	CGI-N-Shore	TRUE	FALSE	FALSE
cg00776782	chr1	12677088	12677089	DHRS3	9249	730	CGI	TRUE	TRUE	FALSE
cg00807959	chr1	48176281	48176282	FOXD2	2306	274591	CGI	FALSE	FALSE	TRUE
cg00903998	chr1	216897293	216897294	USH2A	7399	-300554	CGI-S-Shore	TRUE	TRUE	FALSE
cg00913953	chr1	6189040	6189041	CHD5	26038	51152	CGI	FALSE	TRUE	FALSE
cg00918422	chr1	11115051	11115052	SRM	6723	5038	CGI-S-Shore	FALSE	TRUE	FALSE
cg00953309	chr1	16460784	16460785	EPHA2	1969	21796	CGI	FALSE	TRUE	FALSE
cg00962913	chr1	179712281	179712282	FAM163A	148753	15365	CGI	TRUE	TRUE	FALSE
cg00968203	chr1	117284465	117284466	CD2	914	-12619	CGI	FALSE	FALSE	TRUE
cg00992913	chr1	156698515	156698516	RRNAD1	51093	251	CGI	TRUE	FALSE	FALSE
cg01022171	chr1	224033107	224033108	TP53BP2	7159	565	CGI	FALSE	TRUE	FALSE
cg01058717	chr1	1487068	1487069	TMEM240	339453	-11327	CGI-N-Shore	FALSE	TRUE	FALSE
cg01420426	chr1	41832032	41832033	EDN2	1907	118310	CGI-N-Shore	FALSE	FALSE	TRUE
cg01423964	chr1	111217575	111217576	KCNA3	3738	78	CGI	TRUE	FALSE	FALSE
cg01434197	chr1	153508553	153508554	S100A6	6277	162	CGI	TRUE	FALSE	FALSE
cg01553584	chr1	224400672	224400673	DEGS1	8560	29761	Non-CGI	FALSE	FALSE	TRUE
cg01558040	chr1	116184423	116184424	VANGL1	81839	-149	CGI	TRUE	FALSE	FALSE
cg01576340	chr1	9970659	9970660	CTNNBIP1	56998	-342	CGI	TRUE	FALSE	FALSE
cg01717636	chr1	46216399	46216400	IPP	3652	84	CGI	TRUE	FALSE	FALSE
cg01780466	chr1	145477253	145477254	LIX1L	128077	167	CGI	TRUE	FALSE	FALSE
cg01786314	chr1	92950123	92950124	GFI1	2672	2308	CGI	TRUE	TRUE	FALSE
cg01787565	chr1	245318209	245318210	KIF26B	55083	-76	CGI	TRUE	FALSE	FALSE
cg01799338	chr1	36348937	36348938	2001-08-01	26523	13527	CGI	TRUE	TRUE	FALSE
cg01916743	chr1	2238932	2238933	LOC100129534	100129534	45166	CGI	FALSE	TRUE	FALSE
cg01932091	chr1	29213675	29213676	EPB41	2035	71	CGI	TRUE	FALSE	FALSE
cg01970427	chr1	2006896	2006897	PRKCZ	5590	24986	CGI	FALSE	TRUE	FALSE
cg01979157	chr1	2161013	2161014	SKI	6497	878	CGI	TRUE	FALSE	FALSE
cg02096887	chr1	10699831	10699832	CASZ1	54897	156874	CGI	FALSE	TRUE	FALSE
cg02107269	chr1	27248138	27248139	NUDC	10726	-84	CGI	TRUE	TRUE	FALSE
cg02151754	chr1	202679191	202679192	SYT2	127833	358	CGI	FALSE	TRUE	FALSE
cg02152120	chr1	118727840	118727841	SPAG17	200162	6	CGI	TRUE	FALSE	FALSE
cg02331143	chr1	42128043	42128044	EDN2	1907	-177698	CGI	FALSE	TRUE	FALSE
cg02367828	chr1	1872033	1872034	TMEM52	339456	-21292	CGI	FALSE	FALSE	TRUE
cg02392774	chr1	53164140	53164141	SELRC1	65260	-101	CGI	TRUE	FALSE	FALSE
cg02482614	chr1	995013	995014	RNF223	401934	14672	CGI	TRUE	FALSE	FALSE
cg02583234	chr1	22157799	22157800	LDLRAD2	401944	19040	Non-CGI	TRUE	TRUE	FALSE
cg02631286	chr1	32281722	32281723	SPOCD1	90853	-141	Non-CGI	TRUE	FALSE	FALSE
cg02769781	chr1	1713676	1713677	NADK	65220	-2167	CGI	FALSE	FALSE	TRUE
cg02847589	chr1	22778394	22778395	ZBTB40	9923	49	CGI	TRUE	FALSE	FALSE
cg02901753	chr1	200117055	200117056	FAM58BP	339521	-65599	CGI	FALSE	TRUE	FALSE
cg02971920	chr1	1095607	1095608	MIR200B	406984	-6875	CGI	FALSE	FALSE	TRUE
cg02994162	chr1	159915569	159915570	IGSF9	57549	-182	CGI	TRUE	FALSE	FALSE
cg03001875	chr1	234614834	234614835	TARBP1	6894	13	CGI	TRUE	FALSE	FALSE
cg03115835	chr1	26758846	26758847	DHDDS	79947	72	CGI	TRUE	FALSE	FALSE
cg03126043	chr1	205601084	205601085	ELK4	2005	48544	CGI	TRUE	TRUE	FALSE
cg03129717	chr1	87795122	87795123	LMO4	8543	970	CGI	FALSE	TRUE	FALSE
cg03220945	chr1	205537877	205537878	MFSD4	148808	-233	CGI	TRUE	FALSE	FALSE
cg03227570	chr1	17766306	17766307	RCC2	55920	-55	CGI	TRUE	FALSE	FALSE
cg03258346	chr1	67896128	67896129	SERBP1	26135	-4	CGI	TRUE	FALSE	FALSE
cg03303757	chr1	11120145	11120146	SRM	6723	-53	CGI	TRUE	FALSE	FALSE
cg03401580	chr1	147142653	147142654	ACP6	51205	-18	CGI	TRUE	FALSE	FALSE
cg03421440	chr1	92414520	92414521	BRDT	676	-406	CGI-N-Shore	TRUE	FALSE	FALSE
cg03437914	chr1	155179138	155179139	THBS3	7059	-168	CGI	TRUE	TRUE	FALSE
cg03470088	chr1	24513939	24513940	IFNLR1	163702	-173	CGI	TRUE	FALSE	FALSE
cg03546360	chr1	12675968	12675969	DHRS3	9249	1850	CGI-N-Shore	FALSE	TRUE	FALSE
cg03607891	chr1	66099615	66099616	PDE4B	5142	-158576	Non-CGI	FALSE	TRUE	FALSE
cg03614954	chr1	24439418	24439419	MYOM3	127294	-752	CGI-S-Shore	TRUE	FALSE	FALSE
cg03636215	chr1	38512601	38512602	POU3F1	5453	-150	CGI	TRUE	FALSE	FALSE
cg03716942	chr1	1821981	1821982	GNB1	2782	543	CGI	FALSE	TRUE	FALSE
cg03745244	chr1	16399725	16399726	FAM131C	348487	400	CGI	FALSE	TRUE	FALSE
cg03861428	chr1	17380702	17380703	SDHB	6390	-36	CGI	TRUE	FALSE	FALSE
cg03884587	chr1	177150934	177150935	FAM5B	57795	10300	CGI	FALSE	TRUE	FALSE
cg03901660	chr1	221050459	221050460	HLX	3142	-2282	CGI	FALSE	FALSE	TRUE
cg03902160	chr1	29586660	29586661	PTPRU	10076	23631	CGI	FALSE	TRUE	FALSE
cg03957204	chr1	154377970	154377971	IL6R	3570	300	CGI	TRUE	FALSE	FALSE
cg03970039	chr1	6550645	6550646	TNFRSF25	8718	-24389	CGI	TRUE	TRUE	FALSE
cg03971828	chr1	25071582	25071583	CLIC4	25932	-176	CGI	TRUE	FALSE	FALSE
cg03987003	chr1	145516092	145516093	GNRHR2	114814	-15	CGI	TRUE	FALSE	FALSE
cg04025728	chr1	6259688	6259689	RPL22	6146	-8	CGI	TRUE	FALSE	FALSE
cg04080067	chr1	205601196	205601197	ELK4	2005	48432	CGI	TRUE	TRUE	FALSE
cg04083753	chr1	9258836	9258837	H6PD	9563	-36025	CGI	FALSE	FALSE	TRUE
cg04134399	chr1	246231142	246231143	SMYD3	64754	439500	Non-CGI	FALSE	TRUE	FALSE
cg04158115	chr1	36863305	36863306	LSM10	84967	186	CGI	FALSE	TRUE	FALSE
cg04161137	chr1	22974180	22974181	C1QC	714	4061	CGI	FALSE	TRUE	FALSE
cg04275664	chr1	89149955	89149956	PKN2	5586	32	CGI	TRUE	TRUE	FALSE
cg04307831	chr1	246729669	246729670	CNST	163882	29	CGI	TRUE	FALSE	FALSE
cg04490108	chr1	150337032	150337033	RPRD2	23248	41	CGI	TRUE	FALSE	FALSE
cg04509266	chr1	207991597	207991598	LOC148696	148696	-125	CGI-N-Shore	TRUE	TRUE	FALSE
cg04570362	chr1	9871402	9871403	CLSTN1	22883	13146	Non-CGI	FALSE	TRUE	FALSE
cg04707332	chr1	119528018	119528019	TBX15	6913	4159	CGI	FALSE	TRUE	FALSE
cg04837461	chr1	212587676	212587677	TMEM206	55248	589	CGI	FALSE	TRUE	FALSE
cg04845625	chr1	202287435	202287436	UBE2T	29089	23657	CGI	FALSE	TRUE	FALSE
cg04875476	chr1	156720919	156720920	MRPL24	79590	-9995	CGI	FALSE	TRUE	FALSE
cg04910183	chr1	193090988	193090989	CDC73	79577	-98	CGI	TRUE	FALSE	FALSE
cg04933208	chr1	29586414	29586415	PTPRU	10076	23385	CGI	FALSE	TRUE	FALSE
cg04944491	chr1	245938453	245938454	KIF26B	55083	620165	CGI	FALSE	TRUE	FALSE
cg05035248	chr1	1020820	1020821	RNF223	401934	-11132	CGI-S-Shore	FALSE	TRUE	FALSE
cg05043431	chr1	229406934	229406935	RAB4A	5867	54	CGI	TRUE	FALSE	FALSE
cg05048680	chr1	1342566	1342567	MRPL20	55052	125	CGI	TRUE	FALSE	FALSE
cg05264881	chr1	15375148	15375149	TMEM51-AS1	200197	103810	CGI	FALSE	TRUE	FALSE
cg05270922	chr1	101775452	101775453	S1PR1	1901	73146	CGI	FALSE	FALSE	TRUE
cg05301102	chr1	180992117	180992118	STX6	10228	-70	CGI	TRUE	FALSE	FALSE
cg05302064	chr1	5922686	5922687	MIR4689	100616421	113	CGI-N-Shore	FALSE	FALSE	TRUE
cg05365220	chr1	94375159	94375160	GCLM	2730	-146	CGI	TRUE	FALSE	FALSE
cg05388468	chr1	193074664	193074665	GLRX2	51022	578	CGI	TRUE	TRUE	FALSE
cg05393563	chr1	45672071	45672072	ZSWIM5	57643	177	CGI	TRUE	FALSE	FALSE
cg05625889	chr1	25944100	25944101	MAN1C1	57134	140	CGI	TRUE	FALSE	FALSE
cg05640069	chr1	94312038	94312039	MIR760	100126348	-348	CGI	TRUE	TRUE	FALSE
cg05660803	chr1	212459290	212459291	PPP2R5A	5525	410	CGI	TRUE	FALSE	FALSE
cg05710142	chr1	33223592	33223593	KIAA1522	57648	16079	CGI-S-Shelf	FALSE	TRUE	FALSE
cg05787193	chr1	84543369	84543370	PRKACB	5567	-374	CGI	TRUE	FALSE	FALSE
cg05803631	chr1	7844446	7844447	PER3	8863	65	CGI	TRUE	TRUE	FALSE
cg05923687	chr1	63795711	63795712	FOXD3	27022	6980	CGI	FALSE	FALSE	TRUE
cg05930370	chr1	224545104	224545105	CNIH4	29097	508	CGI	FALSE	TRUE	FALSE
cg06033579	chr1	12662841	12662842	DHRS3	9249	14977	Non-CGI	FALSE	TRUE	FALSE
cg06057576	chr1	27719045	27719046	GPR3	2827	-105	CGI	TRUE	FALSE	FALSE
cg06078874	chr1	231114777	231114778	ARV1	64801	-44	CGI	TRUE	FALSE	FALSE
cg06092654	chr1	202780290	202780291	KDM5B	10765	-2740	CGI	FALSE	FALSE	TRUE
cg06128920	chr1	1447374	1447375	ATAD3A	55210	-147	CGI	TRUE	FALSE	FALSE
cg06187080	chr1	232573578	232573579	SIPA1L2	57568	77663	Non-CGI	FALSE	TRUE	FALSE
cg06219821	chr1	12290367	12290368	VPS13D	55187	253	CGI	FALSE	TRUE	FALSE
cg06444984	chr1	153651297	153651298	NPR1	4881	132	CGI	TRUE	FALSE	FALSE
cg06512514	chr1	32479141	32479142	KHDRBS1	10657	-348	CGI	TRUE	FALSE	FALSE
cg06515144	chr1	179545091	179545092	NPHS2	7827	-6	CGI	TRUE	FALSE	FALSE
cg06527865	chr1	234746497	234746498	IRF2BP2	359948	-1225	CGI	TRUE	FALSE	FALSE
cg06528214	chr1	178995107	178995108	FAM20B	9917	32	CGI	TRUE	FALSE	FALSE
cg06620092	chr1	114697523	114697524	SYT6	148281	-1050	CGI	TRUE	FALSE	FALSE
cg06632353	chr1	11322381	11322382	MTOR	2475	225	CGI	FALSE	TRUE	FALSE
cg06637812	chr1	203293433	203293434	BTG2	7832	18768	CGI-N-Shelf	FALSE	FALSE	TRUE
cg06639788	chr1	100503523	100503524	HIAT1	64645	-264	CGI	TRUE	FALSE	FALSE
cg06646682	chr1	1273442	1273443	TAS1R3	83756	6715	CGI	FALSE	TRUE	FALSE
cg06650698	chr1	3558138	3558139	WRAP73	49856	8531	CGI	FALSE	TRUE	FALSE
cg06753883	chr1	12079449	12079450	MIIP	60672	149	CGI	TRUE	FALSE	FALSE
cg06755661	chr1	43919542	43919543	HYI	81888	116	CGI	TRUE	TRUE	FALSE
cg06765909	chr1	36396899	36396900	2003-08-01	192669	579	CGI	TRUE	TRUE	FALSE
cg06796869	chr1	228471009	228471010	OBSCN	84033	75147	CGI	FALSE	TRUE	FALSE
cg06842519	chr1	85666970	85666971	SYDE2	84144	-241	CGI	TRUE	FALSE	FALSE
cg06852298	chr1	247615658	247615659	OR2B11	127623	-373	CGI-S-Shore	TRUE	FALSE	FALSE
cg06872500	chr1	153508523	153508524	S100A6	6277	192	CGI	TRUE	FALSE	FALSE
cg06875189	chr1	111682593	111682594	DRAM2	128338	243	CGI	TRUE	TRUE	FALSE
cg06934615	chr1	183441736	183441737	SMG7	9887	229	CGI	TRUE	FALSE	FALSE
cg06936155	chr1	91192451	91192452	BARHL2	343472	-9656	CGI	FALSE	FALSE	TRUE
cg06940705	chr1	14924712	14924713	KAZN	23254	-499	CGI	TRUE	FALSE	FALSE
cg06942637	chr1	153633895	153633896	SNAPIN	23557	2749	CGI-S-Shelf	FALSE	TRUE	FALSE
cg06982544	chr1	150254546	150254547	C1orf51	148523	-405	CGI	TRUE	FALSE	FALSE
cg06982917	chr1	43282933	43282934	CCDC23	374969	124	CGI	TRUE	TRUE	FALSE
cg06985534	chr1	117909609	117909610	MAN1A2	10905	-474	CGI	TRUE	FALSE	FALSE
cg06985721	chr1	55464653	55464654	BSND	7809	35	CGI-S-Shore	TRUE	FALSE	FALSE
cg07010359	chr1	20209420	20209421	OTUD3	23252	531	CGI	FALSE	TRUE	FALSE
cg07011357	chr1	92949813	92949814	GFI1	2672	2618	CGI	TRUE	TRUE	FALSE
cg07015775	chr1	86174125	86174126	ZNHIT6	54680	-8	CGI	TRUE	FALSE	FALSE
cg07017209	chr1	220263177	220263178	BPNT1	10380	12	CGI	TRUE	TRUE	FALSE
cg07103618	chr1	228337366	228337367	GJC2	57165	-47	Non-CGI	TRUE	FALSE	FALSE
cg07151560	chr1	111991897	111991898	WDR77	79084	-66	CGI	TRUE	TRUE	FALSE
cg07152177	chr1	231004507	231004508	C1orf198	84886	826	CGI	TRUE	TRUE	FALSE
cg07172756	chr1	22213908	22213909	HSPG2	3339	49840	CGI	FALSE	TRUE	FALSE
cg07201754	chr1	39491318	39491319	NDUFS5	4725	-647	CGI-N-Shore	TRUE	FALSE	FALSE
cg07219542	chr1	110210770	110210771	GSTM2	2946	12071	CGI	TRUE	TRUE	FALSE
cg07221967	chr1	18969717	18969718	PAX7	5081	12216	CGI	FALSE	TRUE	FALSE
cg07236781	chr1	25291041	25291042	RUNX3	864	569	CGI	TRUE	TRUE	FALSE
cg07243241	chr1	35545205	35545206	ZMYM1	79830	232	CGI	FALSE	TRUE	FALSE
cg07344096	chr1	7724122	7724123	VAMP3	9341	-107205	CGI	FALSE	TRUE	FALSE
cg07346851	chr1	160370286	160370287	VANGL2	57216	54	CGI	TRUE	TRUE	FALSE
cg07367222	chr1	3053584	3053585	MIR4251	100422968	9044	CGI-S-Shore	FALSE	TRUE	FALSE
cg07398561	chr1	114447571	114447572	AP4B1	10717	168	CGI	TRUE	FALSE	FALSE
cg07425541	chr1	236305663	236305664	GPR137B	7107	-167	CGI	TRUE	FALSE	FALSE
cg07479786	chr1	150967828	150967829	FAM63A	55793	13024	Non-CGI	FALSE	TRUE	FALSE
cg07502168	chr1	214725311	214725312	PTPN14	5784	-286	CGI	TRUE	FALSE	FALSE
cg07550869	chr1	3302283	3302284	ARHGEF16	27237	-68862	CGI-N-Shore	FALSE	TRUE	FALSE
cg07574241	chr1	26126996	26126997	SEPN1	57190	328	CGI	FALSE	TRUE	FALSE
cg07590482	chr1	22109175	22109176	USP48	84196	511	CGI	FALSE	TRUE	FALSE
cg07706442	chr1	84971874	84971875	GNG5	2787	386	CGI	TRUE	TRUE	FALSE
cg07788537	chr1	2799876	2799877	TTC34	100287898	-93645	CGI	FALSE	FALSE	TRUE
cg07790615	chr1	237205174	237205175	RYR2	6262	-526	CGI	TRUE	FALSE	FALSE
cg07962812	chr1	183441443	183441444	SMG7	9887	-61	CGI	TRUE	FALSE	FALSE
cg08104202	chr1	169396712	169396713	C1orf114	57821	33193	CGI	TRUE	TRUE	FALSE
cg08125719	chr1	205012449	205012450	CNTN2	6900	383	CGI	TRUE	TRUE	FALSE
cg08128087	chr1	33593457	33593458	ADC	113451	46742	CGI-S-Shore	FALSE	FALSE	TRUE
cg08128274	chr1	206832043	206832044	DYRK3	8444	23161	Non-CGI	FALSE	TRUE	FALSE
cg08138435	chr1	212874634	212874635	BATF3	55509	-1306	CGI-S-Shore	TRUE	FALSE	FALSE
cg08241939	chr1	204700816	204700817	LRRN2	10446	-46218	Non-CGI	FALSE	FALSE	TRUE
cg08261858	chr1	246887303	246887304	SCCPDH	51097	-73	CGI-N-Shore	TRUE	FALSE	FALSE
cg08275633	chr1	11751631	11751632	MAD2L2	10459	45	CGI	TRUE	FALSE	FALSE
cg08277003	chr1	26827064	26827065	HMGN2	3151	28161	CGI	FALSE	FALSE	TRUE
cg08457158	chr1	41367714	41367715	CITED4	163732	-39695	Non-CGI	FALSE	FALSE	TRUE
cg08458292	chr1	57890610	57890611	C8B	732	-458921	CGI	TRUE	TRUE	FALSE
cg08468375	chr1	173887101	173887102	SERPINC1	462	-584	Non-CGI	TRUE	FALSE	FALSE
cg08468991	chr1	109506060	109506061	CLCC1	23155	49	CGI	TRUE	FALSE	FALSE
cg08479976	chr1	90286333	90286334	LRRC8D	55144	-238	CGI	TRUE	FALSE	FALSE
cg08623154	chr1	154192647	154192648	UBAP2L	9898	-6	CGI-N-Shore	TRUE	TRUE	FALSE
cg08638697	chr1	45454370	45454371	EIF2B3	8891	-2008	CGI-S-Shore	FALSE	FALSE	TRUE
cg08661290	chr1	6674110	6674111	PHF13	148479	353	CGI	TRUE	FALSE	FALSE
cg08706837	chr1	37940090	37940091	ZC3H12A	80149	-27	CGI	TRUE	FALSE	FALSE
cg08748615	chr1	39957298	39957299	BMP8A	353500	-18	CGI	TRUE	FALSE	FALSE
cg08831354	chr1	155145252	155145253	TRIM46	80128	-167	CGI-N-Shore	TRUE	TRUE	FALSE
cg08844894	chr1	12226961	12226962	TNFRSF1B	7133	-97	CGI	TRUE	FALSE	FALSE
cg08857729	chr1	67217826	67217827	TCTEX1D1	200132	-312	CGI	TRUE	FALSE	FALSE
cg08894131	chr1	147231061	147231062	GJA5	2702	14421	Non-CGI	TRUE	TRUE	FALSE
cg08930741	chr1	59369549	59369550	LOC100131060	100131060	118725	CGI	FALSE	FALSE	TRUE
cg08935021	chr1	28832541	28832542	RCC1	1104	85	CGI	TRUE	FALSE	FALSE
cg09030113	chr1	162531726	162531727	UAP1	6675	429	CGI	FALSE	TRUE	FALSE
cg09107855	chr1	100598443	100598444	SASS6	163786	66	CGI	TRUE	FALSE	FALSE
cg09135754	chr1	2863146	2863147	ACTRT2	140625	-74898	CGI-N-Shore	FALSE	FALSE	TRUE
cg09179249	chr1	10732900	10732901	CASZ1	54897	123805	CGI	FALSE	TRUE	FALSE
cg09258327	chr1	236305010	236305011	GPR137B	7107	-820	CGI	TRUE	FALSE	FALSE
cg09318375	chr1	67218090	67218091	TCTEX1D1	200132	-48	CGI	TRUE	FALSE	FALSE
cg09327714	chr1	91316253	91316254	BARHL2	343472	-133458	CGI-N-Shore	FALSE	TRUE	FALSE
cg09367891	chr1	107599246	107599247	PRMT6	55170	-19	CGI	TRUE	FALSE	FALSE
cg09510180	chr1	10895978	10895979	CASZ1	54897	-39270	CGI	FALSE	FALSE	TRUE
cg09515767	chr1	47903385	47903386	FOXD2	2306	1695	CGI	TRUE	FALSE	FALSE
cg09583777	chr1	94703079	94703080	ARHGAP29	9411	37543	CGI	TRUE	TRUE	FALSE
cg09754868	chr1	16175872	16175873	FLJ37453	729614	-1229	CGI	TRUE	TRUE	FALSE
cg09767598	chr1	220960017	220960018	MARC1	64757	-20	CGI-N-Shore	TRUE	FALSE	FALSE
cg09791324	chr1	154973945	154973946	ZBTB7B	51043	-1159	CGI	TRUE	FALSE	FALSE
cg09799690	chr1	247267708	247267709	ZNF669	79862	-33	CGI	TRUE	FALSE	FALSE
cg09818520	chr1	151162600	151162601	VPS72	6944	38	CGI	TRUE	FALSE	FALSE
cg09865676	chr1	43389888	43389889	SLC2A1-AS1	440584	-34830	CGI	FALSE	FALSE	TRUE
cg09867230	chr1	154972398	154972399	ZBTB7B	51043	-2706	CGI	FALSE	FALSE	TRUE
cg09896346	chr1	23751195	23751196	TCEA3	6920	64	CGI	TRUE	FALSE	FALSE
cg09933215	chr1	31360239	31360240	SDC3	9672	21239	Non-CGI	FALSE	TRUE	FALSE
cg09935045	chr1	57111199	57111200	PRKAA2	5563	208	CGI	FALSE	TRUE	FALSE
cg10011777	chr1	2451511	2451512	PANK4	55229	6522	CGI	FALSE	TRUE	FALSE
cg10053149	chr1	28908509	28908510	SNHG12	85028	-125	CGI	TRUE	FALSE	FALSE
cg10057528	chr1	2116747	2116748	C1orf86	199990	22423	CGI	FALSE	TRUE	FALSE
cg10059687	chr1	6526129	6526130	TNFRSF25	8718	124	CGI-N-Shore	TRUE	FALSE	FALSE
cg10130860	chr1	43124230	43124231	PPIH	10465	181	CGI	TRUE	TRUE	FALSE
cg10174867	chr1	225117431	225117432	DNAH14	127602	74	CGI	TRUE	FALSE	FALSE
cg10180406	chr1	186649877	186649878	PTGS2	5743	-317	CGI	TRUE	FALSE	FALSE
cg10231603	chr1	155829206	155829207	GON4L	54856	-14	CGI	TRUE	FALSE	FALSE
cg10241147	chr1	26147310	26147311	MTFR1L	56181	912	CGI	TRUE	TRUE	FALSE
cg10241701	chr1	117113180	117113181	CD58	965	533	CGI	FALSE	TRUE	FALSE
cg10327320	chr1	26147299	26147300	MTFR1L	56181	901	CGI	TRUE	TRUE	FALSE
cg10390174	chr1	156675491	156675492	CRABP2	1382	115	CGI	TRUE	TRUE	FALSE
cg10390736	chr1	40420692	40420693	MFSD2A	84879	-90	CGI	TRUE	FALSE	FALSE
cg10430904	chr1	45769554	45769555	LOC400752	400752	-26	CGI	TRUE	FALSE	FALSE
cg10445911	chr1	154971922	154971923	ZBTB7B	51043	-3182	CGI	FALSE	FALSE	TRUE
cg10503906	chr1	35545014	35545015	ZMYM1	79830	41	CGI	TRUE	FALSE	FALSE
cg10519004	chr1	3314443	3314444	ARHGEF16	27237	-56702	CGI-S-Shore	FALSE	TRUE	FALSE
cg10522587	chr1	120166026	120166027	LINC00622	644242	-24111	CGI	FALSE	TRUE	FALSE
cg10574377	chr1	18908098	18908099	PAX7	5081	-49400	Non-CGI	FALSE	FALSE	TRUE
cg10577937	chr1	26798947	26798948	HMGN2	3151	44	CGI	TRUE	FALSE	FALSE
cg10588310	chr1	3332000	3332001	ARHGEF16	27237	-39145	CGI-S-Shore	FALSE	TRUE	FALSE
cg10626816	chr1	39025249	39025250	MYCBP	26292	313799	CGI	FALSE	FALSE	TRUE
cg10700634	chr1	6566528	6566529	PLEKHG5	57449	13539	CGI	FALSE	TRUE	FALSE
cg10701282	chr1	234350003	234350004	MIR4671	100616380	-92208	CGI	TRUE	TRUE	FALSE
cg10705488	chr1	1550648	1550649	MIB2	142678	-145	CGI	TRUE	FALSE	FALSE
cg10801633	chr1	10579190	10579191	PEX14	5195	44186	Non-CGI	FALSE	TRUE	FALSE
cg10965041	chr1	28415294	28415295	EYA3	2140	-145	CGI	TRUE	FALSE	FALSE
cg10966083	chr1	220701817	220701818	MARK1	4139	248	CGI	TRUE	FALSE	FALSE
cg10983544	chr1	248020377	248020378	TRIM58	25893	-122	CGI-N-Shore	TRUE	FALSE	FALSE
cg10987926	chr1	1490906	1490907	TMEM240	339453	-15165	CGI-S-Shore	FALSE	TRUE	FALSE
cg11157172	chr1	3210417	3210418	ARHGEF16	27237	-160728	CGI	FALSE	TRUE	FALSE
cg11332484	chr1	20208967	20208968	OTUD3	23252	78	CGI	TRUE	FALSE	FALSE
cg11333835	chr1	23495430	23495431	LUZP1	7798	8869	CGI	TRUE	TRUE	FALSE
cg11522610	chr1	106623429	106623430	PRMT6	55170	-975836	CGI-N-Shore	FALSE	FALSE	TRUE
cg11528978	chr1	47134349	47134350	ATPAF1	64756	-249	CGI	TRUE	TRUE	FALSE
cg11531628	chr1	27930643	27930644	AHDC1	27245	-281	CGI	TRUE	FALSE	FALSE
cg11594415	chr1	171454668	171454669	PRRC2C	23215	1	CGI	TRUE	FALSE	FALSE
cg11653406	chr1	40367713	40367714	MYCL1	4610	-25	CGI	TRUE	FALSE	FALSE
cg11661340	chr1	222628632	222628633	HHIPL2	79802	92810	Non-CGI	FALSE	FALSE	TRUE
cg11717506	chr1	113498382	113498383	SLC16A1	6566	591	CGI	TRUE	TRUE	FALSE
cg11726631	chr1	955757	955758	AGRN	375790	253	CGI	FALSE	TRUE	FALSE
cg11732257	chr1	235492059	235492060	GGPS1	9453	305	CGI	TRUE	TRUE	FALSE
cg11785652	chr1	92949337	92949338	GFI1	2672	3094	CGI	TRUE	TRUE	FALSE
cg11806528	chr1	113051977	113051978	WNT2B	7482	41936	CGI	TRUE	TRUE	FALSE
cg11823253	chr1	213154553	213154554	VASH2	79805	30665	Non-CGI	FALSE	TRUE	FALSE
cg11836369	chr1	160254759	160254760	DCAF8	50717	180	CGI	FALSE	TRUE	FALSE
cg11857665	chr1	234745902	234745903	IRF2BP2	359948	-630	CGI	TRUE	FALSE	FALSE
cg11911250	chr1	155247191	155247192	HCN3	57657	-181	CGI	TRUE	TRUE	FALSE
cg11953245	chr1	228291591	228291592	C1orf35	79169	-568	CGI-S-Shore	TRUE	FALSE	FALSE
cg11954479	chr1	92952196	92952197	GFI1	2672	235	CGI	TRUE	TRUE	FALSE
cg11976407	chr1	33814857	33814858	MIR3605	100500853	-16763	CGI	FALSE	TRUE	FALSE
cg12073565	chr1	235530973	235530974	TBCE	6905	244	CGI	FALSE	TRUE	FALSE
cg12092561	chr1	11538840	11538841	PTCHD2	57540	-453	CGI	TRUE	FALSE	FALSE
cg12177922	chr1	154245232	154245233	HAX1	10456	192	CGI	TRUE	FALSE	FALSE
cg12178578	chr1	45792714	45792715	HPDL	84842	168	CGI	TRUE	FALSE	FALSE
cg12391964	chr1	1986275	1986276	PRKCZ	5590	4365	CGI-S-Shore	FALSE	TRUE	FALSE
cg12394377	chr1	24514218	24514219	IFNLR1	163702	-452	CGI	TRUE	FALSE	FALSE
cg12396969	chr1	27319532	27319533	TRNP1	388610	-661	CGI-N-Shore	TRUE	TRUE	FALSE
cg12407421	chr1	19011016	19011017	PAX7	5081	53515	CGI-N-Shore	FALSE	TRUE	FALSE
cg12410370	chr1	43296526	43296527	CCDC23	374969	-13466	CGI	TRUE	TRUE	FALSE
cg12419308	chr1	110052464	110052465	AMIGO1	57463	-127	CGI	TRUE	FALSE	FALSE
cg12470011	chr1	205473662	205473663	CDK18	5129	-20	CGI-N-Shore	TRUE	FALSE	FALSE
cg12483545	chr1	2198879	2198880	SKI	6497	38744	CGI-S-Shore	FALSE	TRUE	FALSE
cg12525822	chr1	91487036	91487037	ZNF644	84146	774	CGI	TRUE	TRUE	FALSE
cg12551635	chr1	27994779	27994780	IFI6	2537	3943	CGI	FALSE	TRUE	FALSE
cg12578791	chr1	94884189	94884190	ABCD3	5825	255	CGI	FALSE	TRUE	FALSE
cg12610061	chr1	40916055	40916056	ZFP69B	65243	280	CGI	TRUE	TRUE	FALSE
cg12629875	chr1	247171403	247171404	ZNF695	57116	-7	CGI	TRUE	TRUE	FALSE
cg12646754	chr1	2574751	2574752	MMEL1	79258	-10269	CGI	FALSE	TRUE	FALSE
cg12663426	chr1	155115785	155115786	DPM3	54344	-2788	CGI-S-Shelf	FALSE	FALSE	TRUE
cg12688521	chr1	5772057	5772058	MIR4417	100616489	147925	CGI-N-Shore	FALSE	FALSE	TRUE
cg12769657	chr1	201140721	201140722	TMEM9	252839	-18	CGI	TRUE	FALSE	FALSE
cg12798157	chr1	19600719	19600720	AKR7L	246181	-150	CGI	TRUE	FALSE	FALSE
cg12804283	chr1	240569726	240569727	GREM2	64388	205734	CGI	FALSE	TRUE	FALSE
cg12909559	chr1	100435310	100435311	SLC35A3	23443	-228	CGI-N-Shore	TRUE	FALSE	FALSE
cg13053783	chr1	1334803	1334804	CCNL2	81669	-84	CGI	TRUE	FALSE	FALSE
cg13059411	chr1	112533221	112533222	KCND3	3752	-1443	CGI	TRUE	FALSE	FALSE
cg13065121	chr1	204159498	204159499	KISS1	3814	6119	CGI-N-Shore	FALSE	TRUE	FALSE
cg13132577	chr1	60392140	60392141	CYP2J2	1573	281	CGI-N-Shore	FALSE	TRUE	FALSE
cg13168877	chr1	1896470	1896471	KIAA1751	85452	38804	CGI	FALSE	TRUE	FALSE
cg13175786	chr1	3159615	3159616	MIR4251	100422968	115075	CGI	FALSE	TRUE	FALSE
cg13183282	chr1	155948244	155948245	ARHGEF2	9181	11618	CGI	TRUE	TRUE	FALSE
cg13195796	chr1	39491975	39491976	NDUFS5	4725	7	CGI	TRUE	FALSE	FALSE
cg13202122	chr1	65886182	65886183	LEPR	3953	50	CGI	TRUE	FALSE	FALSE
cg13233534	chr1	162531423	162531424	UAP1	6675	126	CGI	TRUE	FALSE	FALSE
cg13235288	chr1	155293343	155293344	RUSC1-AS1	284618	593	CGI	TRUE	TRUE	FALSE
cg13371836	chr1	840274	840275	LOC100130417	100130417	14541	CGI	FALSE	FALSE	TRUE
cg13371870	chr1	245286587	245286588	KIF26B	55083	-31698	Non-CGI	FALSE	TRUE	FALSE
cg13374701	chr1	27190088	27190089	SFN	2810	454	CGI	TRUE	TRUE	FALSE
cg13400003	chr1	111683051	111683052	DRAM2	128338	-212	CGI	TRUE	TRUE	FALSE
cg13430225	chr1	53662423	53662424	CPT2	1376	321	CGI	TRUE	FALSE	FALSE
cg13440781	chr1	168148262	168148263	TIPRL	261726	90	CGI	TRUE	FALSE	FALSE
cg13444964	chr1	236687053	236687054	LGALS8-AS1	100287902	753	CGI	TRUE	TRUE	FALSE
cg13457165	chr1	40105079	40105080	HEYL	26508	267	CGI	FALSE	TRUE	FALSE
cg13562446	chr1	51702078	51702079	RNF11	26994	132	CGI	TRUE	FALSE	FALSE
cg13572638	chr1	227173653	227173654	ADCK3	56997	89063	CGI	FALSE	TRUE	FALSE
cg13575252	chr1	1477616	1477617	TMEM240	339453	-1875	CGI	TRUE	TRUE	FALSE
cg13576006	chr1	154193656	154193657	C1orf43	25912	-382	CGI	TRUE	TRUE	FALSE
cg13579901	chr1	167905492	167905493	DCAF6	55827	-303	CGI	TRUE	TRUE	FALSE
cg13689737	chr1	42383644	42383645	HIVEP3	59269	117950	CGI-N-Shore	FALSE	TRUE	FALSE
cg13841804	chr1	150207467	150207468	ANP32E	81611	1035	CGI	TRUE	TRUE	FALSE
cg13898470	chr1	6688607	6688608	THAP3	90326	3681	CGI	FALSE	TRUE	FALSE
cg13935437	chr1	19600673	19600674	AKR7L	246181	-104	CGI	TRUE	FALSE	FALSE
cg13976876	chr1	192778160	192778161	RGS2	5997	-7	CGI	TRUE	FALSE	FALSE
cg14011415	chr1	41249513	41249514	KCNQ4	9132	-169	CGI	TRUE	FALSE	FALSE
cg14155482	chr1	151171082	151171083	PIP5K1A	8394	60	CGI	TRUE	FALSE	FALSE
cg14156405	chr1	241520286	241520287	RGS7	6000	190	CGI	TRUE	FALSE	FALSE
cg14160632	chr1	244615247	244615248	ADSS	159	187	CGI	TRUE	FALSE	FALSE
cg14170756	chr1	16563782	16563783	RSG1	79363	-122	CGI	TRUE	FALSE	FALSE
cg14175690	chr1	119527638	119527639	TBX15	6913	4539	CGI	FALSE	TRUE	FALSE
cg14222140	chr1	24711941	24711942	STPG1	90529	29644	Non-CGI	FALSE	TRUE	FALSE
cg14416284	chr1	160068509	160068510	IGSF8	93185	107	CGI	TRUE	TRUE	FALSE
cg14561217	chr1	210425254	210425255	SERTAD4-AS1	574036	-17787	CGI	FALSE	FALSE	TRUE
cg14599015	chr1	205210699	205210700	TMCC2	9911	13660	CGI-N-Shore	FALSE	TRUE	FALSE
cg14609025	chr1	119550983	119550984	TBX15	6913	-18803	CGI	FALSE	FALSE	TRUE
cg14653225	chr1	228003938	228003939	PRSS38	339501	519	CGI	FALSE	TRUE	FALSE
cg14654194	chr1	38156235	38156236	C1orf109	54955	1651	CGI	TRUE	TRUE	FALSE
cg14661946	chr1	116694919	116694920	MAB21L3	126868	40542	CGI	FALSE	FALSE	TRUE
cg14793596	chr1	1290092	1290093	DVL1	1855	-5599	CGI	FALSE	TRUE	FALSE
cg14844172	chr1	182758764	182758765	NPL	80896	179	CGI	TRUE	FALSE	FALSE
cg14976971	chr1	229478633	229478634	CCSAP	126731	53	CGI	FALSE	TRUE	FALSE
cg14978994	chr1	1978115	1978116	PRKCZ	5590	-3792	CGI-S-Shore	FALSE	FALSE	TRUE
cg14985478	chr1	86174138	86174139	ZNHIT6	54680	-21	CGI	TRUE	FALSE	FALSE
cg15030799	chr1	1052094	1052095	C1orf159	54991	-357	CGI	TRUE	FALSE	FALSE
cg15057150	chr1	206680618	206680619	RASSF5	83593	-259	CGI	TRUE	FALSE	FALSE
cg15108705	chr1	233749544	233749545	KCNK1	3775	-204	CGI	TRUE	FALSE	FALSE
cg15208524	chr1	10270712	10270713	KIF1B	23095	-50	CGI	TRUE	FALSE	FALSE
cg15293611	chr1	182759062	182759063	NPL	80896	477	CGI	FALSE	TRUE	FALSE
cg15328582	chr1	168195103	168195104	SFT2D2	375035	-150	CGI	TRUE	FALSE	FALSE
cg15395193	chr1	145516314	145516315	PEX11B	8799	148	CGI	TRUE	FALSE	FALSE
cg15472574	chr1	43148457	43148458	YBX1	4904	390	CGI	FALSE	TRUE	FALSE
cg15472784	chr1	3663531	3663532	TP73-AS1	57212	404	CGI	TRUE	FALSE	FALSE
cg15487867	chr1	1475742	1475743	TMEM240	339453	-1	CGI	TRUE	FALSE	FALSE
cg15501415	chr1	57107842	57107843	PRKAA2	5563	-3146	CGI-N-Shelf	FALSE	FALSE	TRUE
cg15525053	chr1	211688778	211688779	RD3	343035	-22518	CGI	FALSE	FALSE	TRUE
cg15545624	chr1	61516555	61516556	NFIA	4774	-26389	CGI	FALSE	FALSE	TRUE
cg15545739	chr1	9100316	9100317	SLC2A7	155184	-13911	CGI	FALSE	TRUE	FALSE
cg15551144	chr1	41707379	41707380	SCMH1	22955	434	CGI	FALSE	TRUE	FALSE
cg15576900	chr1	44883697	44883698	RNF220	55182	12736	CGI	FALSE	TRUE	FALSE
cg15578091	chr1	236908064	236908065	MTR	4548	-50515	Non-CGI	FALSE	TRUE	FALSE
cg15578948	chr1	1689012	1689013	SLC35E2B	728661	-11573	CGI	FALSE	TRUE	FALSE
cg15601228	chr1	21996376	21996377	RAP1GAP	5909	-519	CGI-S-Shore	TRUE	FALSE	FALSE
cg15602298	chr1	157670825	157670826	FCRL3	115352	-49	Non-CGI	TRUE	FALSE	FALSE
cg15651650	chr1	205425005	205425006	MIR135B	442891	-7478	CGI	TRUE	FALSE	FALSE
cg15714196	chr1	45241175	45241176	RPS8	6202	-69	CGI	TRUE	FALSE	FALSE
cg15727564	chr1	94713218	94713219	ARHGAP29	9411	27404	CGI	FALSE	TRUE	FALSE
cg15803895	chr1	227923227	227923228	JMJD4	65094	-114	CGI	TRUE	TRUE	FALSE
cg15819225	chr1	3583333	3583334	TP73	7161	14203	Non-CGI	FALSE	TRUE	FALSE
cg15823064	chr1	87794194	87794195	LMO4	8543	42	CGI	TRUE	FALSE	FALSE
cg15831200	chr1	110765724	110765725	KCNC4	3749	12387	CGI	FALSE	TRUE	FALSE
cg15841063	chr1	63789500	63789501	FOXD3	27022	769	CGI	TRUE	FALSE	FALSE
cg15892785	chr1	6309343	6309344	HES3	390992	5090	CGI	FALSE	TRUE	FALSE
cg15936121	chr1	153700431	153700432	INTS3	65123	-116	CGI	TRUE	FALSE	FALSE
cg15993652	chr1	1145618	1145619	TNFRSF18	8784	-3528	CGI	FALSE	FALSE	TRUE
cg16008440	chr1	161983790	161983791	OLFML2B	25903	9852	Non-CGI	FALSE	TRUE	FALSE
cg16011679	chr1	85725395	85725396	C1orf52	148423	-39	CGI	TRUE	FALSE	FALSE
cg16031338	chr1	2430136	2430137	PLCH2	9651	22381	CGI-S-Shore	TRUE	TRUE	FALSE
cg16045498	chr1	120490955	120490956	ADAM30	11085	-51807	Non-CGI	FALSE	TRUE	FALSE
cg16049364	chr1	244080978	244080979	LOC339529	339529	273	CGI	FALSE	TRUE	FALSE
cg16136678	chr1	8021749	8021750	PARK7	11315	34	CGI	TRUE	FALSE	FALSE
cg16253132	chr1	113249942	113249943	RHOC	389	81	CGI	TRUE	FALSE	FALSE
cg16277706	chr1	90287101	90287102	LRRC8D	55144	527	CGI	TRUE	TRUE	FALSE
cg16290123	chr1	6663532	6663533	KLHL21	9903	-602	CGI	TRUE	FALSE	FALSE
cg16298481	chr1	89989717	89989718	LRRC8B	23507	-678	CGI-N-Shore	TRUE	FALSE	FALSE
cg16352085	chr1	859719	859720	SAMD11	148398	-809	CGI	TRUE	FALSE	FALSE
cg16370716	chr1	161129255	161129256	USP21	27005	0	CGI	TRUE	FALSE	FALSE
cg16410706	chr1	212873963	212873964	BATF3	55509	-635	CGI	TRUE	FALSE	FALSE
cg16417258	chr1	919731	919732	C1orf170	84808	-2257	CGI-S-Shore	FALSE	FALSE	TRUE
cg16431705	chr1	85742210	85742211	LOC646626	646626	168	CGI	TRUE	FALSE	FALSE
cg16490470	chr1	208390388	208390389	PLXNA2	5362	27275	CGI-N-Shore	TRUE	TRUE	FALSE
cg16518825	chr1	40625852	40625853	RLF	6018	-1187	CGI-N-Shore	TRUE	FALSE	FALSE
cg16546681	chr1	155244518	155244519	HCN3	57657	-2854	CGI-S-Shore	TRUE	TRUE	FALSE
cg16555184	chr1	149982714	149982715	OTUD7B	56957	-27	CGI	TRUE	FALSE	FALSE
cg16582156	chr1	110091224	110091225	GNAI3	2773	37	CGI	TRUE	FALSE	FALSE
cg16600927	chr1	200708027	200708028	CAMSAP2	23271	-657	CGI	TRUE	FALSE	FALSE
cg16674327	chr1	47799633	47799634	CMPK1	51727	163	CGI	TRUE	FALSE	FALSE
cg16717690	chr1	1208709	1208710	UBE2J2	118424	523	CGI	FALSE	TRUE	FALSE
cg16897415	chr1	161129615	161129616	USP21	27005	360	CGI	FALSE	TRUE	FALSE
cg16986315	chr1	19181291	19181292	TAS1R2	80834	4862	CGI	FALSE	TRUE	FALSE
cg16987101	chr1	226297828	226297829	H3F3AP4	440926	46149	CGI	FALSE	FALSE	TRUE
cg17013432	chr1	40506131	40506132	CAP1	10487	-122	CGI	TRUE	FALSE	FALSE
cg17031493	chr1	186343755	186343756	TPR	7175	1107	CGI	TRUE	TRUE	FALSE
cg17075937	chr1	10532696	10532697	DFFA	1676	-82	CGI	TRUE	FALSE	FALSE
cg17080709	chr1	110091589	110091590	GNAI3	2773	402	CGI	FALSE	TRUE	FALSE
cg17099671	chr1	2517236	2517237	FAM213B	127281	-661	CGI-N-Shore	TRUE	FALSE	FALSE
cg17170583	chr1	156721123	156721124	MRPL24	79590	-10199	CGI	TRUE	TRUE	FALSE
cg17172773	chr1	150980817	150980818	FAM63A	55793	35	CGI	TRUE	FALSE	FALSE
cg17175208	chr1	6241179	6241180	CHD5	26038	-984	CGI	TRUE	FALSE	FALSE
cg17211447	chr1	10490667	10490668	APITD1-CORT	100526739	507	CGI	TRUE	TRUE	FALSE
cg17239678	chr1	38273928	38273929	YRDC	79693	-62	CGI	TRUE	FALSE	FALSE
cg17252808	chr1	178994930	178994931	FAM20B	9917	-142	CGI	TRUE	FALSE	FALSE
cg17257175	chr1	155163542	155163543	MUC1	4582	-835	CGI	TRUE	FALSE	FALSE
cg17422926	chr1	2159369	2159370	SKI	6497	-763	CGI	TRUE	FALSE	FALSE
cg17427154	chr1	246887380	246887381	SCCPDH	51097	1	CGI	TRUE	FALSE	FALSE
cg17427639	chr1	20803085	20803086	CAMK2N1	55450	9641	CGI	FALSE	FALSE	TRUE
cg17429900	chr1	184724195	184724196	EDEM3	80267	-153	CGI	TRUE	FALSE	FALSE
cg17454086	chr1	155903354	155903355	KIAA0907	22889	832	CGI-N-Shore	FALSE	TRUE	FALSE
cg17477995	chr1	8085641	8085642	ERRFI1	54206	750	CGI-N-Shore	FALSE	TRUE	FALSE
cg17486066	chr1	34330045	34330046	HMGB4	127540	3968	Non-CGI	TRUE	TRUE	FALSE
cg17498841	chr1	235667974	235667975	B3GALNT2	148789	-192	CGI	TRUE	FALSE	FALSE
cg17498856	chr1	1457042	1457043	ATAD3A	55210	9518	CGI-S-Shore	FALSE	TRUE	FALSE
cg17515966	chr1	6265894	6265895	RNF207	388591	-293	CGI	TRUE	FALSE	FALSE
cg17591741	chr1	206316396	206316397	CTSE	1510	-1061	Non-CGI	TRUE	FALSE	FALSE
cg17603057	chr1	26232820	26232821	MIR3917	100500808	123	CGI	TRUE	TRUE	FALSE
cg17724171	chr1	6240267	6240268	CHD5	26038	-72	CGI	TRUE	FALSE	FALSE
cg17725100	chr1	111098247	111098248	KCNA10	3744	-36449	CGI	FALSE	FALSE	TRUE
cg17748167	chr1	31769917	31769918	ZCCHC17	51538	74	CGI	TRUE	FALSE	FALSE
cg17799654	chr1	114444754	114444755	AP4B1	10717	2985	CGI-N-Shelf	TRUE	TRUE	FALSE
cg17800649	chr1	11159423	11159424	EXOSC10	5394	513	CGI	FALSE	TRUE	FALSE
cg17804627	chr1	35325459	35325460	SMIM12	113444	-41	CGI	TRUE	FALSE	FALSE
cg17808634	chr1	4275141	4275142	LOC284661	284661	-196968	Non-CGI	FALSE	FALSE	TRUE
cg17824277	chr1	13838127	13838128	LRRC38	126755	2113	CGI-N-Shore	FALSE	TRUE	FALSE
cg17859048	chr1	151170906	151170907	PIP5K1A	8394	-113	CGI	TRUE	FALSE	FALSE
cg17874478	chr1	48937653	48937654	SPATA6	54558	221	CGI	TRUE	FALSE	FALSE
cg17882959	chr1	160231874	160231875	DCAF8	50717	23065	CGI	FALSE	TRUE	FALSE
cg17929645	chr1	245082179	245082180	EFCAB2	84288	-50990	CGI	FALSE	FALSE	TRUE
cg17969377	chr1	235530852	235530853	TBCE	6905	123	CGI	TRUE	TRUE	FALSE
cg18018245	chr1	167906535	167906536	MPC2	25874	-227	CGI	TRUE	TRUE	FALSE
cg18021393	chr1	145516084	145516085	GNRHR2	114814	-7	CGI	TRUE	FALSE	FALSE
cg18085998	chr1	33938224	33938225	ZSCAN20	7579	-6	CGI	TRUE	FALSE	FALSE
cg18149508	chr1	10532693	10532694	DFFA	1676	-79	CGI	TRUE	FALSE	FALSE
cg18163627	chr1	11071588	11071589	TARDBP	23435	-1089	CGI-N-Shore	TRUE	FALSE	FALSE
cg18174052	chr1	183604830	183604831	ARPC5	10092	153	CGI	TRUE	FALSE	FALSE
cg18194393	chr1	16767185	16767186	NECAP2	55707	17	CGI	TRUE	FALSE	FALSE
cg18194483	chr1	44064515	44064516	KDM4A	9682	-51280	CGI-S-Shore	TRUE	TRUE	FALSE
cg18219212	chr1	16162653	16162654	SPEN	23013	-11704	CGI	FALSE	TRUE	FALSE
cg18227923	chr1	52870174	52870175	ORC1	4998	-30	CGI	TRUE	FALSE	FALSE
cg18232828	chr1	10846092	10846093	CASZ1	54897	10613	Non-CGI	FALSE	TRUE	FALSE
cg18237510	chr1	153919190	153919191	DENND4B	9909	-35	CGI	TRUE	FALSE	FALSE
cg18271913	chr1	205561852	205561853	MFSD4	148808	23739	CGI	FALSE	TRUE	FALSE
cg18289048	chr1	225615672	225615673	LBR	3930	883	CGI	TRUE	TRUE	FALSE
cg18375860	chr1	237205409	237205410	RYR2	6262	-291	CGI	TRUE	FALSE	FALSE
cg18387343	chr1	27248345	27248346	NUDC	10726	120	CGI	TRUE	TRUE	FALSE
cg18534318	chr1	156829287	156829288	INSRR	3645	-574	CGI	TRUE	TRUE	FALSE
cg18539461	chr1	201709675	201709676	MIR1231	100302158	-68062	CGI	FALSE	TRUE	FALSE
cg18793088	chr1	201798611	201798612	IPO9	55705	322	CGI	FALSE	TRUE	FALSE
cg18855356	chr1	16957483	16957484	CROCCP2	84809	13693	CGI-N-Shore	TRUE	TRUE	FALSE
cg18892537	chr1	151966104	151966105	S100A10	6281	608	CGI	TRUE	TRUE	FALSE
cg18941796	chr1	17764175	17764176	RCC2	55920	2073	CGI	FALSE	TRUE	FALSE
cg18966232	chr1	3183165	3183166	MIR4251	100422968	138625	CGI	FALSE	TRUE	FALSE
cg18976046	chr1	1118391	1118392	TTLL10	254173	9104	CGI	FALSE	TRUE	FALSE
cg19234509	chr1	115124245	115124246	BCAS2	10286	18	CGI	TRUE	TRUE	FALSE
cg19282714	chr1	17445929	17445930	PADI2	11240	17	CGI	TRUE	FALSE	FALSE
cg19308497	chr1	160147442	160147443	CASQ1	844	-12841	Non-CGI	TRUE	TRUE	FALSE
cg19370322	chr1	39456833	39456834	AKIRIN1	79647	-81	CGI	TRUE	FALSE	FALSE
cg19375880	chr1	43353441	43353442	ZNF691	51058	41196	CGI	FALSE	TRUE	FALSE
cg19406040	chr1	110527169	110527170	AHCYL1	10768	-216	CGI-N-Shore	TRUE	FALSE	FALSE
cg19408915	chr1	172412924	172412925	PIGC	5279	304	CGI	TRUE	TRUE	FALSE
cg19507727	chr1	233086292	233086293	NTPCR	84284	-76	CGI	TRUE	FALSE	FALSE
cg19508561	chr1	32740758	32740759	HDAC1	3065	-16948	CGI	FALSE	TRUE	FALSE
cg19624489	chr1	50022440	50022441	AGBL4	84871	467184	CGI	FALSE	TRUE	FALSE
cg19624799	chr1	212588350	212588351	TMEM206	55248	-82	CGI	TRUE	FALSE	FALSE
cg19628481	chr1	4844111	4844112	AJAP1	55966	129005	CGI-S-Shore	FALSE	FALSE	TRUE
cg19694957	chr1	1907658	1907659	KIAA1751	85452	27616	CGI	FALSE	TRUE	FALSE
cg19720805	chr1	156470719	156470720	MEF2D	4209	-189	CGI	TRUE	FALSE	FALSE
cg19775916	chr1	117284396	117284397	CD2	914	-12688	CGI-N-Shore	FALSE	FALSE	TRUE
cg19811123	chr1	228401572	228401573	OBSCN	84033	5710	CGI	TRUE	TRUE	FALSE
cg19857564	chr1	92545888	92545889	BTBD8	284697	25	CGI	TRUE	FALSE	FALSE
cg19915020	chr1	10490985	10490986	APITD1-CORT	100526739	825	CGI	TRUE	TRUE	FALSE
cg19928739	chr1	2089555	2089556	C1orf86	199990	49615	CGI	FALSE	TRUE	FALSE
cg19937480	chr1	45987798	45987799	PRDX1	5052	762	CGI	TRUE	TRUE	FALSE
cg20014778	chr1	229761614	229761615	TAF5L	27097	178	CGI	TRUE	TRUE	FALSE
cg20153751	chr1	10595970	10595971	PEX14	5195	60966	CGI	FALSE	TRUE	FALSE
cg20156999	chr1	249154285	249154286	ZNF692	55657	-969	CGI-S-Shore	TRUE	FALSE	FALSE
cg20256117	chr1	1093335	1093336	MIR200B	406984	-9147	CGI	FALSE	FALSE	TRUE
cg20275932	chr1	23695367	23695368	C1orf213	148898	-95	CGI	TRUE	TRUE	FALSE
cg20288000	chr1	10735169	10735170	CASZ1	54897	121536	CGI-S-Shore	FALSE	TRUE	FALSE
cg20318608	chr1	179712591	179712592	FAM163A	148753	15675	CGI	FALSE	TRUE	FALSE
cg20330021	chr1	155036303	155036304	EFNA3	1944	89	CGI	TRUE	FALSE	FALSE
cg20386875	chr1	228675901	228675902	RNF187	149603	832	CGI-S-Shore	TRUE	TRUE	FALSE
cg20457732	chr1	71172486	71172487	CTH	1491	295584	CGI-S-Shore	FALSE	TRUE	FALSE
cg20685020	chr1	44440676	44440677	ATP6V0B	533	73	CGI	TRUE	FALSE	FALSE
cg20703523	chr1	16302590	16302591	ZBTB17	7709	35	CGI	TRUE	FALSE	FALSE
cg20704560	chr1	10698313	10698314	CASZ1	54897	158392	CGI-N-Shore	FALSE	TRUE	FALSE
cg20706316	chr1	8398600	8398601	SLC45A1	50651	14209	CGI-N-Shore	FALSE	TRUE	FALSE
cg20781819	chr1	173837197	173837198	ZBTB37	84614	-21	CGI	TRUE	FALSE	FALSE
cg20799547	chr1	24969494	24969495	SRRM1	10250	-98	CGI	TRUE	FALSE	FALSE
cg20802051	chr1	65613403	65613404	AK4	205	170	CGI	TRUE	TRUE	FALSE
cg20804700	chr1	85462939	85462940	MCOLN2	255231	-142	CGI	TRUE	FALSE	FALSE
cg20823455	chr1	120166605	120166606	ZNF697	90874	23783	CGI	FALSE	TRUE	FALSE
cg20846212	chr1	236444798	236444799	ERO1LB	56605	539	CGI	FALSE	TRUE	FALSE
cg20961605	chr1	156571221	156571222	GPATCH4	54865	56	CGI	TRUE	FALSE	FALSE
cg20971527	chr1	8921294	8921295	ENO1-AS1	100505975	-17598	Non-CGI	FALSE	TRUE	FALSE
cg21106418	chr1	1613911	1613912	MMP23A	8511	-17465	CGI	FALSE	TRUE	FALSE
cg21142904	chr1	158047439	158047440	LOC646268	646268	62989	Non-CGI	FALSE	TRUE	FALSE
cg21164723	chr1	214776304	214776305	CENPF	1063	-226	CGI	TRUE	FALSE	FALSE
cg21167817	chr1	3277557	3277558	ARHGEF16	27237	-93588	CGI	FALSE	TRUE	FALSE
cg21173317	chr1	1478665	1478666	TMEM240	339453	-2924	CGI	FALSE	TRUE	FALSE
cg21214613	chr1	16344536	16344537	CLCNKA	1187	-832	CGI	TRUE	TRUE	FALSE
cg21266749	chr1	226249703	226249704	H3F3A	3020	-703	CGI	TRUE	FALSE	FALSE
cg21421701	chr1	212872679	212872680	BATF3	55509	646	CGI	FALSE	TRUE	FALSE
cg21472468	chr1	146522878	146522879	LOC728989	728989	-8278	CGI-S-Shore	FALSE	FALSE	TRUE
cg21474509	chr1	36235489	36235490	CLSPN	63967	60	CGI	TRUE	FALSE	FALSE
cg21540765	chr1	200008933	200008934	NR5A2	2494	12162	CGI	FALSE	TRUE	FALSE
cg21583850	chr1	112532802	112532803	KCND3	3752	-1024	CGI	TRUE	FALSE	FALSE
cg21680979	chr1	204485559	204485560	MDM4	4194	51	CGI	TRUE	FALSE	FALSE
cg21689812	chr1	156571355	156571356	GPATCH4	54865	-75	CGI	TRUE	FALSE	FALSE
cg21864563	chr1	44584417	44584418	KLF17	128209	70386	CGI-N-Shore	TRUE	TRUE	FALSE
cg21959316	chr1	85040158	85040159	CTBS	1486	3	CGI	TRUE	FALSE	FALSE
cg21963643	chr1	181451911	181451912	CACNA1E	777	-773	CGI	TRUE	FALSE	FALSE
cg22024145	chr1	87170575	87170576	SH3GLB1	51100	321	CGI	TRUE	FALSE	FALSE
cg22063056	chr1	109505929	109505930	CLCC1	23155	180	CGI	FALSE	TRUE	FALSE
cg22221669	chr1	145438279	145438280	TXNIP	10628	-181	CGI	TRUE	FALSE	FALSE
cg22225298	chr1	179339155	179339156	AXDND1	126859	4299	CGI-S-Shelf	TRUE	TRUE	FALSE
cg22237459	chr1	206680720	206680721	RASSF5	83593	-157	CGI	TRUE	FALSE	FALSE
cg22333836	chr1	95392125	95392126	CNN3	1266	608	CGI	TRUE	TRUE	FALSE
cg22358708	chr1	185126161	185126162	SWT1	54823	-29	CGI	TRUE	FALSE	FALSE
cg22428023	chr1	36851581	36851582	STK40	83931	-95	CGI	TRUE	FALSE	FALSE
cg22438763	chr1	47900256	47900257	FOXD2-AS1	84793	55	CGI	TRUE	FALSE	FALSE
cg22443241	chr1	114447798	114447799	AP4B1	10717	-56	CGI	TRUE	FALSE	FALSE
cg22500102	chr1	207226830	207226831	YOD1	55432	-504	CGI	TRUE	TRUE	FALSE
cg22500132	chr1	155162752	155162753	MUC1	4582	-45	CGI-S-Shore	TRUE	FALSE	FALSE
cg22501998	chr1	38155367	38155368	C1orf109	54955	2519	CGI-N-Shore	FALSE	TRUE	FALSE
cg22513511	chr1	151162618	151162619	VPS72	6944	20	CGI	TRUE	FALSE	FALSE
cg22514764	chr1	243637838	243637839	MIR4677	100616343	128359	CGI	FALSE	TRUE	FALSE
cg22517653	chr1	2918612	2918613	ACTRT2	140625	-19432	CGI	FALSE	FALSE	TRUE
cg22693570	chr1	55224579	55224580	PARS2	25973	5645	Non-CGI	TRUE	TRUE	FALSE
cg22706424	chr1	31769819	31769820	ZCCHC17	51538	-21	CGI	TRUE	FALSE	FALSE
cg22802111	chr1	160068614	160068615	IGSF8	93185	2	CGI	TRUE	FALSE	FALSE
cg22817650	chr1	193191405	193191406	B3GALT2	8707	-35661	Non-CGI	FALSE	TRUE	FALSE
cg22821908	chr1	38510522	38510523	POU3F1	5453	1926	CGI	TRUE	FALSE	FALSE
cg22855438	chr1	67395917	67395918	MIER1	57708	5338	CGI	TRUE	TRUE	FALSE
cg22868433	chr1	150208670	150208671	ANP32E	81611	-165	CGI	TRUE	FALSE	FALSE
cg22876327	chr1	202927122	202927123	ADIPOR1	51094	576	CGI	FALSE	TRUE	FALSE
cg23010538	chr1	190447290	190447291	FAM5C	339479	-530	CGI-N-Shore	TRUE	FALSE	FALSE
cg23020486	chr1	236558874	236558875	EDARADD	128178	1193	CGI	TRUE	TRUE	FALSE
cg23021241	chr1	44679211	44679212	DMAP1	55929	85	CGI	TRUE	TRUE	FALSE
cg23051879	chr1	165667556	165667557	ALDH9A1	223	342	CGI	TRUE	TRUE	FALSE
cg23053573	chr1	26662567	26662568	UBXN11	91544	-17810	CGI	FALSE	TRUE	FALSE
cg23056823	chr1	180881583	180881584	KIAA1614	57710	-728	CGI	TRUE	FALSE	FALSE
cg23075983	chr1	59281540	59281541	LOC100131060	100131060	30716	CGI	FALSE	TRUE	FALSE
cg23097696	chr1	156308121	156308122	CCT3	7203	83	CGI	TRUE	TRUE	FALSE
cg23110891	chr1	94344782	94344783	DNTTIP2	30836	-19	CGI	TRUE	FALSE	FALSE
cg23114771	chr1	17294772	17294773	MFAP2	4237	13307	Non-CGI	TRUE	TRUE	FALSE
cg23132469	chr1	19181459	19181460	TAS1R2	80834	4694	CGI-S-Shore	FALSE	TRUE	FALSE
cg23162821	chr1	231664172	231664173	TSNAX-DISC1	100303453	-225	CGI	TRUE	FALSE	FALSE
cg23162904	chr1	112298170	112298171	DDX20	11218	-18	CGI	TRUE	TRUE	FALSE
cg23205692	chr1	25664452	25664453	C1orf63	57035	202	CGI	TRUE	FALSE	FALSE
cg23219859	chr1	50799316	50799317	DMRTA2	63950	89801	CGI	FALSE	FALSE	TRUE
cg23230478	chr1	6360620	6360621	GPR153	387509	-39584	CGI-N-Shore	FALSE	TRUE	FALSE
cg23234149	chr1	3615561	3615562	TP73	7161	46431	CGI	FALSE	TRUE	FALSE
cg23234434	chr1	43390705	43390706	SLC2A1-AS1	440584	-34013	CGI-S-Shore	FALSE	FALSE	TRUE
cg23258881	chr1	150123037	150123038	PLEKHO1	51177	1269	CGI	FALSE	TRUE	FALSE
cg23267042	chr1	70671309	70671310	LRRC40	55631	50	CGI	TRUE	FALSE	FALSE
cg23272189	chr1	9883969	9883970	CLSTN1	22883	579	CGI	TRUE	FALSE	FALSE
cg23274377	chr1	220263237	220263238	BPNT1	10380	-45	CGI	TRUE	TRUE	FALSE
cg23274604	chr1	224517835	224517836	NVL	4931	54	CGI	TRUE	FALSE	FALSE
cg23281832	chr1	119683332	119683333	WARS2	10352	-36	CGI	TRUE	FALSE	FALSE
cg23593528	chr1	197871600	197871601	C1orf53	388722	-80	CGI-N-Shore	TRUE	FALSE	FALSE
cg23599104	chr1	109656320	109656321	C1orf194	127003	157	CGI	TRUE	FALSE	FALSE
cg23645476	chr1	110282472	110282473	GSTM3	2947	1186	CGI	FALSE	TRUE	FALSE
cg23691733	chr1	944093	944094	ISG15	9636	-4752	CGI-S-Shore	FALSE	FALSE	TRUE
cg23815582	chr1	220101945	220101946	SLC30A10	55532	30042	CGI	TRUE	TRUE	FALSE
cg23842890	chr1	11968979	11968980	KIAA2013	90231	17504	CGI	FALSE	FALSE	TRUE
cg23844174	chr1	2064819	2064820	C1orf86	199990	74351	CGI	FALSE	TRUE	FALSE
cg23845507	chr1	91966731	91966732	CDC7	8317	326	CGI	TRUE	TRUE	FALSE
cg23886974	chr1	173793508	173793509	CENPL	91687	267	CGI	TRUE	FALSE	FALSE
cg23922040	chr1	40367804	40367805	MYCL1	4610	-116	CGI	TRUE	FALSE	FALSE
cg23926367	chr1	19574023	19574024	EMC1	23065	4021	CGI-N-Shelf	FALSE	TRUE	FALSE
cg23933399	chr1	1462973	1462974	TMEM240	339453	12765	CGI	FALSE	TRUE	FALSE
cg23959366	chr1	204654587	204654588	LRRN2	10446	8	CGI	TRUE	TRUE	FALSE
cg23987876	chr1	29562838	29562839	PTPRU	10076	-188	CGI	TRUE	FALSE	FALSE
cg23996123	chr1	59369444	59369445	LOC100131060	100131060	118620	CGI	FALSE	FALSE	TRUE
cg23996302	chr1	201140803	201140804	TMEM9	252839	-100	CGI-S-Shore	TRUE	FALSE	FALSE
cg24034429	chr1	26361657	26361658	SLC30A2	7780	10945	CGI-N-Shore	FALSE	TRUE	FALSE
cg24047689	chr1	6614587	6614588	NOL9	79707	69	CGI	TRUE	FALSE	FALSE
cg24054508	chr1	38273761	38273762	YRDC	79693	102	CGI	TRUE	FALSE	FALSE
cg24077080	chr1	37980043	37980044	MEAF6	64769	319	CGI	TRUE	TRUE	FALSE
cg24083324	chr1	214162604	214162605	PROX1	5629	1317	CGI	FALSE	TRUE	FALSE
cg24254517	chr1	212208526	212208527	DTL	51514	-391	CGI	TRUE	TRUE	FALSE
cg24310460	chr1	33283384	33283385	YARS	8565	247	CGI	TRUE	TRUE	FALSE
cg24311947	chr1	28286409	28286410	XKR8	55113	-93	CGI	TRUE	FALSE	FALSE
cg24312719	chr1	93251184	93251185	EVI5	7813	6775	CGI-S-Shore	FALSE	TRUE	FALSE
cg24357276	chr1	114472822	114472823	HIPK1	204851	825	CGI	TRUE	TRUE	FALSE
cg24367016	chr1	168195398	168195399	SFT2D2	375035	142	CGI	FALSE	TRUE	FALSE
cg24404823	chr1	247496053	247496054	ZNF496	84838	-1007	CGI	TRUE	FALSE	FALSE
cg24425531	chr1	15372951	15372952	TMEM51-AS1	200197	106007	CGI-N-Shelf	FALSE	TRUE	FALSE
cg24444188	chr1	200992385	200992386	KIF21B	23046	441	CGI	TRUE	TRUE	FALSE
cg24455365	chr1	20961229	20961230	PINK1	65018	1280	CGI-S-Shore	FALSE	TRUE	FALSE
cg24485408	chr1	44679309	44679310	DMAP1	55929	183	CGI	TRUE	TRUE	FALSE
cg24500456	chr1	19923405	19923406	C1orf151-NBL1	100532736	-64	CGI	TRUE	FALSE	FALSE
cg24506149	chr1	39339048	39339049	MYCBP	26292	0	CGI	TRUE	TRUE	FALSE
cg24514954	chr1	24104624	24104625	LOC100506963	100506963	161	CGI	TRUE	TRUE	FALSE
cg24541835	chr1	12651540	12651541	DHRS3	9249	26278	CGI-N-Shelf	FALSE	TRUE	FALSE
cg24545495	chr1	6149049	6149050	CHD5	26038	91143	CGI	FALSE	TRUE	FALSE
cg24547755	chr1	150980980	150980981	PRUNE	58497	6	CGI	TRUE	FALSE	FALSE
cg24598094	chr1	211753582	211753583	SLC30A1	7779	-1482	CGI-S-Shore	TRUE	FALSE	FALSE
cg24629122	chr1	149889330	149889331	SV2A	9900	102	Non-CGI	TRUE	FALSE	FALSE
cg24670453	chr1	156211892	156211893	BGLAP	632	-57	CGI-N-Shelf	TRUE	TRUE	FALSE
cg24682307	chr1	12227131	12227132	TNFRSF1B	7133	70	CGI	TRUE	FALSE	FALSE
cg24683561	chr1	154934703	154934704	PYGO2	90780	-444	CGI	TRUE	FALSE	FALSE
cg24693287	chr1	31885850	31885851	SERINC2	347735	3437	CGI	TRUE	TRUE	FALSE
cg24851854	chr1	59042275	59042276	TACSTD2	4070	889	CGI	TRUE	FALSE	FALSE
cg24854095	chr1	90286294	90286295	LRRC8D	55144	-277	CGI	TRUE	FALSE	FALSE
cg25005345	chr1	33815686	33815687	MIR3605	100500853	-17592	CGI	TRUE	TRUE	FALSE
cg25008393	chr1	161087351	161087352	NIT1	4817	-509	CGI-N-Shore	TRUE	TRUE	FALSE
cg25018357	chr1	26490989	26490990	ZNF593	51042	-5397	CGI	FALSE	FALSE	TRUE
cg25022560	chr1	205782239	205782240	SLC41A1	254428	-77	CGI	TRUE	FALSE	FALSE
cg25115460	chr1	3607110	3607111	TP73	7161	37980	CGI-N-Shore	TRUE	TRUE	FALSE
cg25140345	chr1	2440291	2440292	PANK4	55229	17742	CGI	FALSE	TRUE	FALSE
cg25140945	chr1	3816479	3816480	C1orf174	339448	376	CGI-N-Shore	TRUE	TRUE	FALSE
cg25192855	chr1	209979283	209979284	IRF6	3664	235	CGI	FALSE	TRUE	FALSE
cg25208724	chr1	156163844	156163845	SLC25A44	9673	113	CGI	TRUE	FALSE	FALSE
cg25272655	chr1	228644958	228644959	HIST3H2A	92815	600	CGI	TRUE	FALSE	FALSE
cg25284512	chr1	55180710	55180711	TTC4	7268	-783	CGI-N-Shore	TRUE	TRUE	FALSE
cg25310909	chr1	165738087	165738088	UCK2	7371	-58643	CGI	TRUE	TRUE	FALSE
cg25367431	chr1	2846836	2846837	ACTRT2	140625	-91208	CGI-S-Shore	FALSE	FALSE	TRUE
cg25367926	chr1	201196047	201196048	IGFN1	91156	36093	Non-CGI	FALSE	TRUE	FALSE
cg25382472	chr1	47779932	47779933	STIL	6491	-112	CGI	TRUE	FALSE	FALSE
cg25389462	chr1	241803298	241803299	OPN3	23596	401	CGI	TRUE	FALSE	FALSE
cg25465019	chr1	87794181	87794182	LMO4	8543	29	CGI	TRUE	FALSE	FALSE
cg25611840	chr1	93913821	93913822	FNBP1L	54874	132	CGI	TRUE	FALSE	FALSE
cg25613251	chr1	59249811	59249812	JUN	3725	-25	CGI	TRUE	FALSE	FALSE
cg25683325	chr1	158151058	158151059	CD1D	912	1320	CGI	FALSE	TRUE	FALSE
cg25729585	chr1	203056475	203056476	MYOG	4656	-1097	CGI-S-Shore	TRUE	FALSE	FALSE
cg25742246	chr1	214153460	214153461	PROX1	5629	-7824	CGI	FALSE	FALSE	TRUE
cg25754252	chr1	171711285	171711286	VAMP4	8674	92	CGI	TRUE	FALSE	FALSE
cg25774098	chr1	161359705	161359706	C1orf192	257177	-22040	CGI	FALSE	FALSE	TRUE
cg26000554	chr1	220921614	220921615	MARC2	54996	-60	CGI	TRUE	FALSE	FALSE
cg26017930	chr1	2232166	2232167	LOC100129534	100129534	51932	CGI	FALSE	TRUE	FALSE
cg26031954	chr1	2139327	2139328	C1orf86	199990	-154	CGI	TRUE	FALSE	FALSE
cg26145502	chr1	8939074	8939075	ENO1	2023	75	CGI	TRUE	TRUE	FALSE
cg26146390	chr1	160068471	160068472	IGSF8	93185	145	CGI	TRUE	TRUE	FALSE
cg26148135	chr1	229479087	229479088	CCSAP	126731	-398	CGI	TRUE	FALSE	FALSE
cg26151283	chr1	27481658	27481659	SLC9A1	6548	-206	CGI	TRUE	FALSE	FALSE
cg26188784	chr1	85039967	85039968	CTBS	1486	194	CGI	TRUE	FALSE	FALSE
cg26224305	chr1	934197	934198	HES4	57801	1353	CGI	FALSE	FALSE	TRUE
cg26335527	chr1	155100185	155100186	EFNA1	1942	-162	CGI	TRUE	FALSE	FALSE
cg26404511	chr1	24229575	24229576	CNR2	1269	10240	CGI	FALSE	TRUE	FALSE
cg26550851	chr1	3701203	3701204	SMIM1	388588	11850	CGI	FALSE	TRUE	FALSE
cg26602477	chr1	1476845	1476846	TMEM240	339453	-1104	CGI-S-Shore	TRUE	FALSE	FALSE
cg26784348	chr1	67520192	67520193	SLC35D1	23169	-111	CGI	TRUE	FALSE	FALSE
cg26823989	chr1	87380673	87380674	HS2ST1	9653	337	CGI	TRUE	FALSE	FALSE
cg26879777	chr1	155145220	155145221	TRIM46	80128	-199	CGI-N-Shore	TRUE	TRUE	FALSE
cg26883190	chr1	53914086	53914087	SLC25A3P1	163742	-8392	Non-CGI	FALSE	FALSE	TRUE
cg26899490	chr1	27114329	27114330	PIGV	55650	-123	CGI	TRUE	FALSE	FALSE
cg27045062	chr1	155054711	155054712	LOC100505666	100505666	-18243	CGI	FALSE	TRUE	FALSE
cg27046936	chr1	78956847	78956848	PTGFR	5737	118	CGI	TRUE	FALSE	FALSE
cg27165836	chr1	4193882	4193883	LOC728716	728716	193209	CGI-S-Shore	FALSE	FALSE	TRUE
cg27167184	chr1	171750545	171750546	METTL13	51603	-214	CGI	TRUE	FALSE	FALSE
cg27173245	chr1	2457999	2458000	PANK4	55229	34	CGI	TRUE	FALSE	FALSE
cg27312709	chr1	6202080	6202081	CHD5	26038	38112	CGI-N-Shore	FALSE	TRUE	FALSE
cg27428660	chr1	54519174	54519175	TMEM59	9528	-62	CGI	TRUE	FALSE	FALSE
cg27449836	chr1	179846920	179846921	TOR1AIP2	163590	19	CGI	TRUE	FALSE	FALSE
cg27505684	chr1	174968509	174968510	CACYBP	27101	-60	CGI	TRUE	FALSE	FALSE
cg27527108	chr1	116711075	116711076	MAB21L3	126868	56698	CGI	FALSE	FALSE	TRUE
cg27547954	chr1	76081962	76081963	SLC44A5	204962	61646	CGI	TRUE	TRUE	FALSE
cg27573606	chr1	838379	838380	LOC100130417	100130417	16436	CGI	FALSE	FALSE	TRUE
cg00001594	chr2	11484705	11484706	ROCK2	9475	4	CGI	TRUE	FALSE	FALSE
cg00041467	chr2	122494276	122494277	MKI67IP	84365	225	CGI	FALSE	TRUE	FALSE
cg00049868	chr2	11245407	11245408	FLJ33534	285150	26938	CGI	FALSE	TRUE	FALSE
cg00074365	chr2	64088479	64088480	UGP2	7360	20380	Non-CGI	FALSE	TRUE	FALSE
cg00092287	chr2	152146295	152146296	NMI	9111	133	CGI	TRUE	FALSE	FALSE
cg00151788	chr2	99757758	99757759	C2orf15	150590	-425	CGI	TRUE	TRUE	FALSE
cg00160002	chr2	237032579	237032580	GBX2	2637	44071	CGI-N-Shore	FALSE	TRUE	FALSE
cg00261781	chr2	20212517	20212518	MATN3	4148	-61	CGI	TRUE	FALSE	FALSE
cg00326131	chr2	74668477	74668478	RTKN	6242	581	CGI	TRUE	TRUE	FALSE
cg00394494	chr2	167232645	167232646	SCN9A	6335	-147	CGI	TRUE	FALSE	FALSE
cg00455450	chr2	176045970	176045971	ATP5G3	518	518	CGI	FALSE	TRUE	FALSE
cg00497554	chr2	242255158	242255159	HDLBP	3069	-42	CGI	TRUE	TRUE	FALSE
cg00551617	chr2	152152581	152152582	NMI	9111	-6150	CGI	FALSE	FALSE	TRUE
cg00584636	chr2	220253109	220253110	DNPEP	23549	11618	CGI	TRUE	TRUE	FALSE
cg00594547	chr2	26257789	26257790	RAB10	10890	1059	CGI	FALSE	TRUE	FALSE
cg00707610	chr2	197036400	197036401	STK17B	9262	4825	CGI	TRUE	TRUE	FALSE
cg00713953	chr2	220462525	220462526	STK11IP	114790	-69	CGI	TRUE	FALSE	FALSE
cg00792783	chr2	198669748	198669749	PLCL1	5334	321	CGI	TRUE	FALSE	FALSE
cg00915609	chr2	97174045	97174046	NEURL3	93082	-198	CGI	TRUE	FALSE	FALSE
cg01044692	chr2	208490024	208490025	METTL21A	151194	39	CGI	TRUE	FALSE	FALSE
cg01101903	chr2	240322401	240322402	HDAC4	9759	943	CGI	TRUE	TRUE	FALSE
cg01111397	chr2	172967676	172967677	DLX2	1746	-197	CGI	TRUE	FALSE	FALSE
cg01129751	chr2	42796040	42796041	MTA3	57504	74330	CGI	FALSE	TRUE	FALSE
cg01270424	chr2	237078509	237078510	GBX2	2637	-1856	CGI-S-Shore	TRUE	FALSE	FALSE
cg01276616	chr2	42396713	42396714	EML4	27436	222	CGI	TRUE	FALSE	FALSE
cg01310600	chr2	96987238	96987239	ITPRIPL1	150771	-3822	CGI	FALSE	FALSE	TRUE
cg01351177	chr2	88991149	88991150	RPIA	22934	-25	CGI	TRUE	FALSE	FALSE
cg01376245	chr2	97426602	97426603	CNNM4	26504	-35	CGI	TRUE	FALSE	FALSE
cg01381678	chr2	197458093	197458094	HECW2	57520	-757	CGI	TRUE	FALSE	FALSE
cg01387102	chr2	238395125	238395126	MLPH	79083	71	CGI	TRUE	FALSE	FALSE
cg01400477	chr2	170218258	170218259	LRP2	4036	862	CGI	FALSE	TRUE	FALSE
cg01417569	chr2	38152292	38152293	RMDN2	151393	-168	CGI	TRUE	FALSE	FALSE
cg01590699	chr2	238475313	238475314	PRLH	51052	95	CGI-S-Shelf	TRUE	FALSE	FALSE
cg01656856	chr2	170551263	170551264	PHOSPHO2-KLHL23	100526832	298	CGI	TRUE	TRUE	FALSE
cg01721569	chr2	66810570	66810571	MEIS1	4211	148037	CGI	FALSE	FALSE	TRUE
cg01741750	chr2	234160137	234160138	ATG16L1	55054	-78	CGI-N-Shore	TRUE	FALSE	FALSE
cg01751470	chr2	85980788	85980789	ATOH8	84913	-119	CGI	TRUE	FALSE	FALSE
cg01925962	chr2	27193339	27193340	MAPRE3	22924	-184	CGI	TRUE	FALSE	FALSE
cg02058731	chr2	232791766	232791767	NPPC	4880	-727	CGI	TRUE	FALSE	FALSE
cg02066650	chr2	111435449	111435450	BUB1	699	233	CGI	FALSE	TRUE	FALSE
cg02281514	chr2	216946545	216946546	PECR	55825	-5	CGI	TRUE	FALSE	FALSE
cg02290684	chr2	239009246	239009247	ESPNL	339768	294	CGI	TRUE	FALSE	FALSE
cg02348634	chr2	47596430	47596431	EPCAM	4072	142	CGI	TRUE	FALSE	FALSE
cg02424378	chr2	85360601	85360602	TCF7L1	83439	17	CGI	TRUE	FALSE	FALSE
cg02463494	chr2	160568812	160568813	BAZ2B	29994	132	CGI	TRUE	TRUE	FALSE
cg02469457	chr2	242254758	242254759	2002-09-01	4735	34	CGI	TRUE	TRUE	FALSE
cg02547025	chr2	30454275	30454276	LBH	81606	-120	CGI	TRUE	FALSE	FALSE
cg02586637	chr2	198318130	198318131	COQ10B	80219	-99	CGI	TRUE	FALSE	FALSE
cg02592214	chr2	128284498	128284499	IWS1	55677	-410	CGI	TRUE	FALSE	FALSE
cg02622866	chr2	176032527	176032528	MIR933	100126350	-89	CGI	TRUE	TRUE	FALSE
cg02639181	chr2	8978042	8978043	KIDINS220	57498	-286	CGI-S-Shore	TRUE	FALSE	FALSE
cg02766770	chr2	30372795	30372796	YPEL5	51646	3044	CGI-S-Shore	FALSE	TRUE	FALSE
cg02782622	chr2	69534307	69534308	GFPT1	2673	80077	CGI	FALSE	FALSE	TRUE
cg02783887	chr2	660856	660857	TMEM18	129787	16581	CGI	FALSE	FALSE	TRUE
cg02806927	chr2	152266364	152266365	RIF1	55183	-31	CGI	TRUE	FALSE	FALSE
cg02949469	chr2	219135266	219135267	PNKD	25953	150	CGI	TRUE	FALSE	FALSE
cg03037033	chr2	86668736	86668737	KDM3A	55818	464	CGI	TRUE	TRUE	FALSE
cg03065822	chr2	152266375	152266376	RIF1	55183	-20	CGI	TRUE	FALSE	FALSE
cg03128421	chr2	55647401	55647402	CCDC88A	55704	-343	CGI-S-Shore	TRUE	FALSE	FALSE
cg03249947	chr2	112896151	112896152	FBLN7	129804	188	CGI	TRUE	FALSE	FALSE
cg03327733	chr2	73114863	73114864	SPR	6697	350	CGI	TRUE	FALSE	FALSE
cg03328041	chr2	131850497	131850498	FAM168B	130074	505	CGI	FALSE	TRUE	FALSE
cg03371404	chr2	241525653	241525654	CAPN10	11132	-478	CGI	TRUE	FALSE	FALSE
cg03445574	chr2	198299961	198299962	SF3B1	23451	-189	CGI	TRUE	FALSE	FALSE
cg03454669	chr2	10192479	10192480	KLF11	8462	8796	Non-CGI	FALSE	TRUE	FALSE
cg03469482	chr2	196933575	196933576	DNAH7	56171	-38	CGI	TRUE	FALSE	FALSE
cg03554736	chr2	241719655	241719656	KIF1A	547	40068	CGI	FALSE	TRUE	FALSE
cg03599729	chr2	200820225	200820226	C2orf47	79568	184	CGI	TRUE	TRUE	FALSE
cg03716672	chr2	143465045	143465046	KYNU	8942	-170148	Non-CGI	FALSE	FALSE	TRUE
cg03717555	chr2	72372167	72372168	CYP26B1	56603	2794	CGI	TRUE	TRUE	FALSE
cg03780430	chr2	11886637	11886638	LPIN1	23175	68915	CGI	TRUE	TRUE	FALSE
cg03832522	chr2	218898668	218898669	RUFY4	285180	-987	CGI	TRUE	FALSE	FALSE
cg03976667	chr2	84686045	84686046	SUCLG1	8802	539	CGI	FALSE	TRUE	FALSE
cg03979229	chr2	26364200	26364201	GAREML	150946	-31758	CGI	FALSE	FALSE	TRUE
cg04066396	chr2	159314911	159314912	PKP4	8502	1434	CGI	TRUE	TRUE	FALSE
cg04142144	chr2	24431211	24431212	FAM228A	653140	33679	CGI-N-Shelf	FALSE	TRUE	FALSE
cg04210100	chr2	9614471	9614472	IAH1	285148	-197	CGI	TRUE	FALSE	FALSE
cg04303908	chr2	241525392	241525393	CAPN10	11132	-739	CGI-N-Shore	TRUE	FALSE	FALSE
cg04306050	chr2	176046468	176046469	ATP5G3	518	20	CGI	TRUE	FALSE	FALSE
cg04318855	chr2	225906085	225906086	DOCK10	55619	1243	CGI	FALSE	TRUE	FALSE
cg04370088	chr2	99061575	99061576	INPP4A	3631	253	CGI	FALSE	TRUE	FALSE
cg04447741	chr2	95613630	95613631	LOC442028	442028	-542	Non-CGI	TRUE	FALSE	FALSE
cg04460285	chr2	113522412	113522413	CKAP2L	150468	-157	CGI	TRUE	FALSE	FALSE
cg04576568	chr2	220377822	220377823	ASIC4	55515	-1068	CGI-N-Shore	TRUE	FALSE	FALSE
cg04609126	chr2	20646520	20646521	RHOB	388	-313	CGI	TRUE	FALSE	FALSE
cg04652957	chr2	54785375	54785376	RPL23AP32	56969	29015	CGI-S-Shore	TRUE	TRUE	FALSE
cg04706655	chr2	97136556	97136557	NEURL3	93082	37288	CGI	FALSE	FALSE	TRUE
cg04707822	chr2	1821497	1821498	PXDN	7837	-73205	CGI	FALSE	TRUE	FALSE
cg04747308	chr2	118943906	118943907	INSIG2	51141	97855	CGI	FALSE	FALSE	TRUE
cg04750100	chr2	136595281	136595282	LCT	3938	-530	Non-CGI	TRUE	FALSE	FALSE
cg04789315	chr2	140505028	140505029	YY1P2	647012	850133	Non-CGI	FALSE	FALSE	TRUE
cg04983151	chr2	202483704	202483705	ALS2CR11	151254	199	CGI	TRUE	FALSE	FALSE
cg05259891	chr2	102866879	102866880	IL18R1	8809	-61081	CGI	FALSE	FALSE	TRUE
cg05310920	chr2	150186634	150186635	LYPD6	130574	134	CGI	TRUE	FALSE	FALSE
cg05417729	chr2	3307997	3307998	TSSC1	7260	73654	CGI	FALSE	TRUE	FALSE
cg05570707	chr2	24270316	24270317	C2orf44	80304	-19	CGI	TRUE	FALSE	FALSE
cg05613116	chr2	27958722	27958723	MRPL33	9553	-35860	CGI-S-Shore	FALSE	FALSE	TRUE
cg05658887	chr2	8833616	8833617	ID2	3398	11502	CGI	FALSE	FALSE	TRUE
cg05684773	chr2	242089732	242089733	PASK	23178	-337	CGI	TRUE	TRUE	FALSE
cg05861971	chr2	101436479	101436480	NPAS2	4862	-132	CGI	TRUE	FALSE	FALSE
cg05882878	chr2	37458821	37458822	NDUFAF7	55471	46	CGI	TRUE	FALSE	FALSE
cg05930133	chr2	66661280	66661281	MEIS1	4211	-1250	CGI	TRUE	FALSE	FALSE
cg05932184	chr2	582544	582545	TMEM18	129787	94893	CGI	FALSE	FALSE	TRUE
cg05963605	chr2	10395189	10395190	HPCAL1	3241	-47849	CGI	FALSE	FALSE	TRUE
cg05977259	chr2	48133053	48133054	FBXO11	80204	-120	CGI	TRUE	FALSE	FALSE
cg05979879	chr2	64751188	64751189	AFTPH	54812	-249	CGI	TRUE	FALSE	FALSE
cg06006530	chr2	242608094	242608095	DTYMK	1841	18287	CGI	TRUE	TRUE	FALSE
cg06023570	chr2	7058545	7058546	RNF144A-AS1	386597	266	CGI-S-Shore	TRUE	TRUE	FALSE
cg06043190	chr2	42396882	42396883	EML4	27436	391	CGI	FALSE	TRUE	FALSE
cg06103677	chr2	242255270	242255271	HDLBP	3069	-154	CGI	TRUE	TRUE	FALSE
cg06161235	chr2	109065510	109065511	GCC2	9648	-65	CGI	TRUE	FALSE	FALSE
cg06165982	chr2	240499816	240499817	HDAC4	9759	-176469	Non-CGI	TRUE	FALSE	FALSE
cg06218228	chr2	238875540	238875541	UBE2F-SCLY	100533179	-45	CGI	TRUE	FALSE	FALSE
cg06227257	chr2	33824395	33824396	FAM98A	25940	-32	CGI	TRUE	FALSE	FALSE
cg06232512	chr2	240612347	240612348	LOC150935	150935	-72205	CGI-N-Shore	FALSE	FALSE	TRUE
cg06233293	chr2	47596185	47596186	EPCAM	4072	-100	CGI-N-Shore	TRUE	FALSE	FALSE
cg06395280	chr2	242295608	242295609	FARP2	9855	-54	CGI	TRUE	FALSE	FALSE
cg06492144	chr2	31806352	31806353	SRD5A2	6716	-311	CGI	TRUE	FALSE	FALSE
cg06679003	chr2	38152283	38152284	RMDN2	151393	-177	CGI	TRUE	FALSE	FALSE
cg06820907	chr2	242122206	242122207	ANO7	50636	-5716	CGI	FALSE	TRUE	FALSE
cg06847283	chr2	217277082	217277083	SMARCAL1	50485	-53	CGI	TRUE	FALSE	FALSE
cg06869899	chr2	28113326	28113327	RBKS	64080	-102	CGI	TRUE	FALSE	FALSE
cg06905692	chr2	30144376	30144377	ALK	238	99	CGI	TRUE	FALSE	FALSE
cg06950666	chr2	240101752	240101753	MGC16025	85009	15399	CGI-S-Shore	FALSE	TRUE	FALSE
cg07263979	chr2	241585888	241585889	AQP12B	653437	36433	CGI-N-Shore	FALSE	FALSE	TRUE
cg07410044	chr2	71222186	71222187	TEX261	113419	-184	CGI	TRUE	FALSE	FALSE
cg07419021	chr2	162274436	162274437	TBR1	10716	1815	CGI	TRUE	TRUE	FALSE
cg07466807	chr2	173326947	173326948	ITGA6	3655	34864	Non-CGI	FALSE	TRUE	FALSE
cg07475885	chr2	85107320	85107321	TRABD2A	129293	930	CGI	FALSE	TRUE	FALSE
cg07568517	chr2	3381687	3381688	TSSC1	7260	-33	CGI	TRUE	FALSE	FALSE
cg07592361	chr2	241496830	241496831	DUSP28	285193	-2639	CGI	FALSE	TRUE	FALSE
cg07652213	chr2	48010362	48010363	MSH6	2956	140	CGI	TRUE	FALSE	FALSE
cg07802350	chr2	176956573	176956574	HOXD13	3239	-957	CGI	TRUE	FALSE	FALSE
cg07834408	chr2	234355294	234355295	DGKD	8527	92140	CGI-N-Shore	FALSE	TRUE	FALSE
cg07871302	chr2	29470049	29470050	CLIP4	79745	149477	Non-CGI	FALSE	TRUE	FALSE
cg07921384	chr2	220299740	220299741	SPEG	10290	39	CGI	TRUE	FALSE	FALSE
cg07960067	chr2	9144629	9144630	MBOAT2	129642	-752	CGI	TRUE	FALSE	FALSE
cg08081869	chr2	24582653	24582654	ITSN2	50618	742	CGI	FALSE	TRUE	FALSE
cg08192414	chr2	231276363	231276364	SP100	6672	-4506	CGI	FALSE	FALSE	TRUE
cg08209388	chr2	242212472	242212473	2002-09-01	4735	-42249	CGI	TRUE	TRUE	FALSE
cg08217163	chr2	66809959	66809960	MEIS1	4211	147426	CGI	FALSE	FALSE	TRUE
cg08235183	chr2	3646196	3646197	COLEC11	78989	3558	CGI-N-Shore	FALSE	TRUE	FALSE
cg08305872	chr2	210867207	210867208	RPE	6120	-143	CGI	TRUE	FALSE	FALSE
cg08325821	chr2	91670297	91670298	LOC654342	654342	177676	CGI	FALSE	FALSE	TRUE
cg08343042	chr2	135476907	135476908	TMEM163	81615	48425	CGI	TRUE	TRUE	FALSE
cg08356102	chr2	240099720	240099721	MGC16025	85009	17431	CGI	TRUE	TRUE	FALSE
cg08407486	chr2	10588068	10588069	ODC1	4953	383	CGI	TRUE	TRUE	FALSE
cg08562543	chr2	27593465	27593466	SNX17	9784	101	CGI	TRUE	FALSE	FALSE
cg08714407	chr2	24307071	24307072	TP53I3	9540	1012	CGI	TRUE	TRUE	FALSE
cg08802203	chr2	233415465	233415466	EIF4E2	9470	107	CGI	TRUE	TRUE	FALSE
cg08879546	chr2	131113730	131113731	PTPN18	26469	149	CGI	TRUE	FALSE	FALSE
cg09007600	chr2	202508229	202508230	TMEM237	65062	-4	CGI	TRUE	FALSE	FALSE
cg09248944	chr2	160654499	160654500	CD302	9936	265	CGI	FALSE	TRUE	FALSE
cg09286061	chr2	68290165	68290166	C1D	10438	-5	CGI	TRUE	FALSE	FALSE
cg09344629	chr2	128471493	128471494	SFT2D3	84826	12895	CGI	FALSE	TRUE	FALSE
cg09368936	chr2	43019819	43019820	HAAO	23498	-67	CGI	TRUE	FALSE	FALSE
cg09462924	chr2	66666470	66666471	MEIS1	4211	3937	CGI	TRUE	TRUE	FALSE
cg09496791	chr2	95787596	95787597	MRPS5	64969	156	CGI	TRUE	FALSE	FALSE
cg09588792	chr2	110371798	110371799	2010-09-01	151011	-14	CGI	TRUE	FALSE	FALSE
cg09731141	chr2	202507362	202507363	TMEM237	65062	860	CGI-N-Shore	TRUE	TRUE	FALSE
cg09974661	chr2	3642634	3642635	COLEC11	78989	-1	CGI	TRUE	FALSE	FALSE
cg10038720	chr2	179397008	179397009	TTN-AS1	100506866	9453	CGI-S-Shore	FALSE	TRUE	FALSE
cg10121586	chr2	175436504	175436505	GPR155	151556	-84692	CGI	FALSE	TRUE	FALSE
cg10125865	chr2	170683981	170683982	UBR3	130507	-35	CGI	TRUE	FALSE	FALSE
cg10188592	chr2	198364785	198364786	HSPE1-MOB4	100529241	63	CGI	TRUE	TRUE	FALSE
cg10245141	chr2	187559130	187559131	FAM171B	165215	340	CGI-S-Shore	TRUE	FALSE	FALSE
cg10315993	chr2	27008359	27008360	CENPA	1058	-521	CGI	TRUE	FALSE	FALSE
cg10397934	chr2	242868376	242868377	CXXC11	285093	56489	CGI	FALSE	FALSE	TRUE
cg10416105	chr2	111435850	111435851	BUB1	699	-165	CGI	TRUE	FALSE	FALSE
cg10508058	chr2	522276	522277	TMEM18	129787	155161	CGI	FALSE	FALSE	TRUE
cg10535353	chr2	200323432	200323433	SATB2-AS1	150538	-9387	CGI	TRUE	TRUE	FALSE
cg10537847	chr2	99953749	99953750	EIF5B	9669	-83	CGI	TRUE	TRUE	FALSE
cg10576499	chr2	80101315	80101316	MIR4264	100422888	-224829	CGI-N-Shore	FALSE	TRUE	FALSE
cg10629682	chr2	27486061	27486062	SLC30A3	7781	12125	CGI	TRUE	TRUE	FALSE
cg10633147	chr2	68384753	68384754	WDR92	116143	-74	CGI	TRUE	FALSE	FALSE
cg10773587	chr2	69614142	69614143	GFPT1	2673	242	CGI	FALSE	TRUE	FALSE
cg10785443	chr2	219827728	219827729	CDK5R2	8941	3329	CGI	FALSE	FALSE	TRUE
cg10884341	chr2	198365065	198365066	HSPD1	3329	-66	CGI	TRUE	FALSE	FALSE
cg10990312	chr2	85108373	85108374	TRABD2A	129293	-120	CGI	TRUE	FALSE	FALSE
cg11027325	chr2	239148674	239148675	HES6	55502	5	CGI	TRUE	FALSE	FALSE
cg11059561	chr2	3428786	3428787	TRAPPC12	51112	45339	CGI	FALSE	TRUE	FALSE
cg11065506	chr2	224903393	224903394	SERPINE2	5270	641	CGI	TRUE	TRUE	FALSE
cg11219022	chr2	166810277	166810278	TTC21B	79809	69	CGI	TRUE	FALSE	FALSE
cg11255154	chr2	191879104	191879105	STAT1	6772	-127	CGI	TRUE	FALSE	FALSE
cg11358945	chr2	157185891	157185892	NR4A2	4929	3394	CGI	TRUE	TRUE	FALSE
cg11549132	chr2	99061257	99061258	INPP4A	3631	-62	CGI	TRUE	FALSE	FALSE
cg11549153	chr2	85132907	85132908	TMSB10	9168	143	CGI	FALSE	TRUE	FALSE
cg11702456	chr2	231280907	231280908	SP100	6672	35	Non-CGI	TRUE	FALSE	FALSE
cg11770407	chr2	179315412	179315413	PRKRA	8575	544	CGI	TRUE	TRUE	FALSE
cg11948456	chr2	179278332	179278333	MIR548N	100302152	31526	CGI-N-Shore	TRUE	TRUE	FALSE
cg12224898	chr2	96971451	96971452	SNRNP200	23020	-143	CGI	TRUE	FALSE	FALSE
cg12302982	chr2	39471028	39471029	CDKL4	344387	-14354	CGI	FALSE	FALSE	TRUE
cg12309703	chr2	218621258	218621259	DIRC3	729582	56	CGI	TRUE	FALSE	FALSE
cg12346749	chr2	10443639	10443640	HPCAL1	3241	598	CGI	TRUE	TRUE	FALSE
cg12411876	chr2	131116574	131116575	PTPN18	26469	2993	CGI-S-Shelf	FALSE	TRUE	FALSE
cg12433473	chr2	220406756	220406757	TMEM198	130612	-1627	CGI	TRUE	TRUE	FALSE
cg12477533	chr2	98703450	98703451	VWA3B	200403	-143	CGI	TRUE	FALSE	FALSE
cg12492094	chr2	178937545	178937546	PDE11A	50940	35519	CGI	TRUE	TRUE	FALSE
cg12644696	chr2	197458104	197458105	HECW2	57520	-768	CGI	TRUE	FALSE	FALSE
cg12795225	chr2	27852085	27852086	CCDC121	79635	-186	CGI	TRUE	TRUE	FALSE
cg12802413	chr2	234752291	234752292	HJURP	55355	10919	CGI	FALSE	TRUE	FALSE
cg12870876	chr2	203736356	203736357	ICA1L	130026	13	CGI	TRUE	FALSE	FALSE
cg12909337	chr2	218899613	218899614	RUFY4	285180	-42	CGI-S-Shore	TRUE	FALSE	FALSE
cg12968172	chr2	239112248	239112249	ILKAP	80895	74	CGI	TRUE	FALSE	FALSE
cg13006424	chr2	98377939	98377940	ZAP70	7535	47907	CGI	TRUE	TRUE	FALSE
cg13136716	chr2	42275153	42275154	PKDCC	91461	-6	CGI	TRUE	FALSE	FALSE
cg13223806	chr2	60784449	60784450	BCL11A	53335	-3815	CGI	FALSE	FALSE	TRUE
cg13225420	chr2	97303412	97303413	KANSL3	55683	701	CGI	TRUE	TRUE	FALSE
cg13297150	chr2	74710531	74710532	CCDC142	84865	-173	CGI	TRUE	TRUE	FALSE
cg13303737	chr2	99758037	99758038	C2orf15	150590	-146	CGI	TRUE	TRUE	FALSE
cg13320002	chr2	71222292	71222293	TEX261	113419	-290	CGI	TRUE	FALSE	FALSE
cg13407825	chr2	70314363	70314364	PCBP1-AS1	400960	-215	CGI	TRUE	FALSE	FALSE
cg13465838	chr2	103235720	103235721	SLC9A2	6549	-444	CGI	TRUE	FALSE	FALSE
cg13579957	chr2	62132778	62132779	COMMD1	150684	-23	CGI-N-Shore	TRUE	FALSE	FALSE
cg13582873	chr2	207024197	207024198	NDUFS1	4719	44	CGI	TRUE	FALSE	FALSE
cg13585492	chr2	3187884	3187885	TSSC1	7260	193767	CGI-S-Shelf	FALSE	FALSE	TRUE
cg13703087	chr2	128848975	128848976	UGGT1	56886	220	CGI	TRUE	TRUE	FALSE
cg13749494	chr2	105489649	105489650	POU3F3	5455	17679	CGI	TRUE	FALSE	FALSE
cg13788515	chr2	207139445	207139446	ZDBF2	57683	-76	CGI	TRUE	FALSE	FALSE
cg13810556	chr2	217363253	217363254	RPL37A	6168	-265	CGI-N-Shore	TRUE	FALSE	FALSE
cg13811315	chr2	190518288	190518289	ASNSD1	54529	-7835	CGI	FALSE	FALSE	TRUE
cg13854983	chr2	136875315	136875316	CXCR4	7852	408	CGI	TRUE	TRUE	FALSE
cg13890435	chr2	73460655	73460656	PRADC1	84279	-298	CGI	TRUE	FALSE	FALSE
cg13954965	chr2	133175192	133175193	GPR39	2863	1044	CGI	TRUE	FALSE	FALSE
cg14059350	chr2	219134997	219134998	AAMP	14	-103	CGI	TRUE	FALSE	FALSE
cg14062745	chr2	65357211	65357212	RAB1A	5861	222	CGI	TRUE	FALSE	FALSE
cg14102272	chr2	201729414	201729415	CLK1	1195	51	CGI	TRUE	FALSE	FALSE
cg14238622	chr2	215674105	215674106	BARD1	580	321	CGI	FALSE	TRUE	FALSE
cg14239497	chr2	23679465	23679466	KLHL29	114818	71166	Non-CGI	FALSE	TRUE	FALSE
cg14330027	chr2	69614473	69614474	GFPT1	2673	-86	CGI	TRUE	FALSE	FALSE
cg14331404	chr2	97482184	97482185	CNNM3	26505	192	CGI	TRUE	FALSE	FALSE
cg14387532	chr2	232571819	232571820	PTMA	5757	-1414	CGI	TRUE	FALSE	FALSE
cg14399369	chr2	58273683	58273684	VRK2	7444	138896	CGI	TRUE	TRUE	FALSE
cg14465080	chr2	10549521	10549522	SNORA80B	100302743	37452	Non-CGI	FALSE	TRUE	FALSE
cg14487680	chr2	3381855	3381856	TSSC1	7260	-201	CGI	TRUE	FALSE	FALSE
cg14657116	chr2	72359477	72359478	CYP26B1	56603	15484	CGI	FALSE	TRUE	FALSE
cg14796127	chr2	173600385	173600386	RAPGEF4	11069	-138	CGI	TRUE	TRUE	FALSE
cg14900246	chr2	112655153	112655154	MERTK	10461	-1036	CGI	TRUE	FALSE	FALSE
cg14957430	chr2	64995219	64995220	SERTAD2	9792	-114172	CGI	FALSE	FALSE	TRUE
cg14972967	chr2	241374723	241374724	GPC1	2817	-390	CGI	TRUE	FALSE	FALSE
cg15109933	chr2	73613564	73613565	ALMS1	7840	677	CGI	FALSE	TRUE	FALSE
cg15146906	chr2	45838581	45838582	SRBD1	55133	-147	CGI-S-Shore	TRUE	FALSE	FALSE
cg15160709	chr2	72357937	72357938	CYP26B1	56603	17024	CGI-N-Shore	FALSE	TRUE	FALSE
cg15338159	chr2	106055507	106055508	FHL2	2274	-276	Non-CGI	TRUE	FALSE	FALSE
cg15376007	chr2	240323239	240323240	HDAC4	9759	105	CGI	TRUE	FALSE	FALSE
cg15459695	chr2	236403016	236403017	AGAP1	116987	282	CGI	TRUE	FALSE	FALSE
cg15506890	chr2	3487001	3487002	ADI1	55256	36347	CGI	FALSE	TRUE	FALSE
cg15546232	chr2	99771159	99771160	TSGA10	80705	26	CGI	TRUE	TRUE	FALSE
cg15553848	chr2	39664346	39664347	MAP4K3	8491	-126	CGI	TRUE	TRUE	FALSE
cg15558969	chr2	748534	748535	TMEM18	129787	-71094	CGI-N-Shore	FALSE	FALSE	TRUE
cg15695852	chr2	43864466	43864467	PLEKHH2	130271	26	CGI	TRUE	FALSE	FALSE
cg15696821	chr2	133013489	133013490	MIR663B	100313824	1162	CGI	FALSE	TRUE	FALSE
cg15717656	chr2	74709666	74709667	TTC31	64427	-532	CGI	TRUE	FALSE	FALSE
cg15989294	chr2	99347422	99347423	MGAT4A	11320	165	CGI	FALSE	TRUE	FALSE
cg16139239	chr2	32288444	32288445	SPAST	6683	-234	CGI	TRUE	FALSE	FALSE
cg16257518	chr2	203776997	203776998	ALS2CR8	79800	18	CGI	TRUE	FALSE	FALSE
cg16421619	chr2	240305693	240305694	HDAC4	9759	17651	CGI	FALSE	TRUE	FALSE
cg16442452	chr2	7739760	7739761	LOC100506274	100506274	178367	CGI-N-Shore	FALSE	FALSE	TRUE
cg16724175	chr2	129660605	129660606	HS6ST1	9394	-584433	CGI-S-Shore	FALSE	FALSE	TRUE
cg16795290	chr2	219433115	219433116	USP37	57695	-30	CGI	TRUE	FALSE	FALSE
cg16813053	chr2	175869807	175869808	CHN1	1123	298	CGI	TRUE	TRUE	FALSE
cg16876647	chr2	43451842	43451843	ZFP36L2	678	1901	CGI	FALSE	TRUE	FALSE
cg16883282	chr2	87035278	87035279	CD8A	925	239	CGI	TRUE	TRUE	FALSE
cg16937778	chr2	219858247	219858248	CRYBA2	1412	-119	CGI	TRUE	FALSE	FALSE
cg16944964	chr2	228190352	228190353	MFF	56947	367	CGI	TRUE	TRUE	FALSE
cg17028834	chr2	162164769	162164770	PSMD14	10213	-15	CGI	TRUE	FALSE	FALSE
cg17141599	chr2	71123688	71123689	VAX2	25806	-4030	CGI	FALSE	FALSE	TRUE
cg17144508	chr2	128283727	128283728	IWS1	55677	358	CGI	FALSE	TRUE	FALSE
cg17149980	chr2	97426598	97426599	CNNM4	26504	-39	CGI	TRUE	FALSE	FALSE
cg17152850	chr2	178627834	178627835	TTC30A	92104	-144139	Non-CGI	FALSE	TRUE	FALSE
cg17169699	chr2	139537544	139537545	NXPH2	11249	265	CGI	FALSE	TRUE	FALSE
cg17187595	chr2	1878990	1878991	PXDN	7837	-130698	CGI-N-Shore	FALSE	TRUE	FALSE
cg17358307	chr2	235951453	235951454	SH3BP4	23677	90824	CGI	FALSE	TRUE	FALSE
cg17386250	chr2	241957517	241957518	SNED1	25992	19261	CGI-S-Shelf	FALSE	TRUE	FALSE
cg17460441	chr2	121199791	121199792	LOC84931	84931	24132	CGI	FALSE	FALSE	TRUE
cg17529832	chr2	105461096	105461097	LOC100506421	100506421	6836	CGI	FALSE	TRUE	FALSE
cg17731243	chr2	1932996	1932997	PXDN	7837	-184704	CGI-N-Shore	FALSE	TRUE	FALSE
cg17749468	chr2	202316740	202316741	STRADB	55437	347	CGI	TRUE	TRUE	FALSE
cg17774001	chr2	25600752	25600753	DNMT3A	1788	-35292	CGI-S-Shore	FALSE	TRUE	FALSE
cg17782715	chr2	241228795	241228796	GPC1	2817	-146318	CGI-N-Shore	FALSE	FALSE	TRUE
cg17804911	chr2	229890602	229890603	PID1	55022	245453	CGI	FALSE	TRUE	FALSE
cg17868920	chr2	158485541	158485542	ACVR1C	130399	-141	CGI	TRUE	FALSE	FALSE
cg17918270	chr2	1983484	1983485	PXDN	7837	-235192	CGI	FALSE	TRUE	FALSE
cg17926234	chr2	61404587	61404588	AHSA2	130872	33	CGI	TRUE	FALSE	FALSE
cg17963935	chr2	11484593	11484594	ROCK2	9475	116	CGI	TRUE	FALSE	FALSE
cg17981927	chr2	242757618	242757619	NEU4	129807	7457	CGI	FALSE	TRUE	FALSE
cg18077307	chr2	98377791	98377792	ZAP70	7535	47759	CGI	TRUE	TRUE	FALSE
cg18078305	chr2	65215753	65215754	SLC1A4	6509	173	CGI	TRUE	FALSE	FALSE
cg18091469	chr2	8724060	8724061	ID2	3398	-98051	CGI	FALSE	FALSE	TRUE
cg18110243	chr2	37384171	37384172	EIF2AK2	5610	17	CGI	TRUE	FALSE	FALSE
cg18120278	chr2	128848689	128848690	UGGT1	56886	-63	CGI	TRUE	FALSE	FALSE
cg18308176	chr2	242786266	242786267	PDCD1	5133	14790	CGI	FALSE	FALSE	TRUE
cg18338495	chr2	220110107	220110108	GLB1L	79411	22	CGI	TRUE	FALSE	FALSE
cg18409705	chr2	163200405	163200406	GCA	25801	-176	CGI-N-Shore	TRUE	FALSE	FALSE
cg18429434	chr2	203499731	203499732	FAM117B	150864	-168	CGI	TRUE	FALSE	FALSE
cg18447471	chr2	242766082	242766083	NEU4	129807	15921	CGI-N-Shore	FALSE	FALSE	TRUE
cg18455731	chr2	3215537	3215538	TSSC1	7260	166114	CGI-S-Shore	FALSE	TRUE	FALSE
cg18643762	chr2	119981172	119981173	STEAP3	55240	-210	CGI	TRUE	FALSE	FALSE
cg18863077	chr2	264731	264732	SH3YL1	26751	77	CGI	TRUE	TRUE	FALSE
cg18949409	chr2	197036502	197036503	STK17B	9262	4723	CGI	TRUE	TRUE	FALSE
cg19023585	chr2	236868124	236868125	GBX2	2637	208526	CGI	FALSE	TRUE	FALSE
cg19084174	chr2	26101348	26101349	ASXL2	55252	-35	CGI	TRUE	FALSE	FALSE
cg19227719	chr2	119067828	119067829	INSIG2	51141	221777	CGI	FALSE	FALSE	TRUE
cg19326622	chr2	73511683	73511684	EGR4	1961	9144	CGI	TRUE	FALSE	FALSE
cg19407717	chr2	1544120	1544121	TPO	7173	166124	CGI	FALSE	TRUE	FALSE
cg19435188	chr2	236293467	236293468	AGAP1	116987	-109264	CGI	FALSE	FALSE	TRUE
cg19447973	chr2	36825273	36825274	FEZ2	9637	57	CGI	TRUE	FALSE	FALSE
cg19475689	chr2	28789802	28789803	PLB1	151056	70863	CGI	FALSE	TRUE	FALSE
cg19565299	chr2	242707237	242707238	GAL3ST2	64090	-9001	CGI	FALSE	TRUE	FALSE
cg19566038	chr2	128615962	128615963	POLR2D	5433	-232	CGI	TRUE	FALSE	FALSE
cg19617395	chr2	232651134	232651135	COPS7B	64708	4688	CGI	TRUE	TRUE	FALSE
cg19655006	chr2	172750994	172750995	SLC25A12	8604	-180	CGI	TRUE	FALSE	FALSE
cg19671395	chr2	240259915	240259916	MIR2467	100616360	13582	CGI-S-Shore	FALSE	TRUE	FALSE
cg19726320	chr2	180886608	180886609	CWC22	57703	-14767	CGI	FALSE	FALSE	TRUE
cg19736490	chr2	220330746	220330747	SPEG	10290	31045	CGI	FALSE	TRUE	FALSE
cg19756097	chr2	99797439	99797440	MITD1	129531	51	CGI	TRUE	TRUE	FALSE
cg19849509	chr2	175204996	175204997	SP9	100131390	5174	CGI	FALSE	FALSE	TRUE
cg19867917	chr2	3642629	3642630	COLEC11	78989	-6	CGI	TRUE	FALSE	FALSE
cg19909111	chr2	232329248	232329249	NCL	4691	-42	CGI	TRUE	FALSE	FALSE
cg19924719	chr2	10920066	10920067	PDIA6	10130	58035	CGI-S-Shelf	FALSE	TRUE	FALSE
cg20005636	chr2	180886672	180886673	CWC22	57703	-14831	CGI	FALSE	FALSE	TRUE
cg20189808	chr2	242756029	242756030	NEU4	129807	5868	CGI	FALSE	TRUE	FALSE
cg20272280	chr2	95825303	95825304	ZNF514	84874	-39	CGI	TRUE	FALSE	FALSE
cg20303879	chr2	201729069	201729070	CLK1	1195	396	CGI	TRUE	TRUE	FALSE
cg20333904	chr2	240724165	240724166	LOC150935	150935	39610	CGI	FALSE	FALSE	TRUE
cg20347626	chr2	25896320	25896321	DTNB	1838	181	CGI	TRUE	FALSE	FALSE
cg20358020	chr2	109150681	109150682	LIMS1	3987	-128	CGI	TRUE	FALSE	FALSE
cg20399842	chr2	21346738	21346739	APOB	338	-79792	CGI-N-Shore	FALSE	FALSE	TRUE
cg20536041	chr2	45029004	45029005	SIX3	6496	-140031	CGI	FALSE	FALSE	TRUE
cg20595046	chr2	29093178	29093179	TRMT61B	55006	-2	CGI	TRUE	FALSE	FALSE
cg20679309	chr2	238969453	238969454	SCLY	51540	-110	CGI	TRUE	TRUE	FALSE
cg20691720	chr2	42989971	42989972	OXER1	165140	1428	CGI-N-Shore	TRUE	FALSE	FALSE
cg20716311	chr2	178257317	178257318	LOC100130691	100130691	100	CGI	TRUE	FALSE	FALSE
cg20801500	chr2	220462218	220462219	STK11IP	114790	-376	CGI	TRUE	FALSE	FALSE
cg20872630	chr2	239023538	239023539	ESPNL	339768	14586	CGI	FALSE	TRUE	FALSE
cg20949959	chr2	43453251	43453252	ZFP36L2	678	492	CGI	TRUE	TRUE	FALSE
cg20960422	chr2	196521941	196521942	SLC39A10	57181	408	CGI	TRUE	TRUE	FALSE
cg21214953	chr2	71357466	71357467	MPHOSPH10	10199	21	CGI	TRUE	FALSE	FALSE
cg21321735	chr2	241760164	241760165	KIF1A	547	-438	CGI	TRUE	FALSE	FALSE
cg21405109	chr2	48010105	48010106	MSH6	2956	-114	CGI	TRUE	FALSE	FALSE
cg21463349	chr2	119600948	119600949	EN1	2019	4809	CGI	FALSE	TRUE	FALSE
cg21497043	chr2	191745649	191745650	GLS	2744	101	CGI	TRUE	FALSE	FALSE
cg21531689	chr2	220253653	220253654	DNPEP	23549	11074	CGI-S-Shore	TRUE	TRUE	FALSE
cg21532323	chr2	157292804	157292805	GPD2	2820	838	CGI	TRUE	TRUE	FALSE
cg21570130	chr2	178128687	178128688	MIR3128	100422824	-7948	CGI	TRUE	TRUE	FALSE
cg21597209	chr2	55746709	55746710	CCDC104	112942	-29	CGI	TRUE	FALSE	FALSE
cg21620608	chr2	139259466	139259467	SPOPL	339745	115	CGI	TRUE	FALSE	FALSE
cg21624407	chr2	32853023	32853024	TTC27	55622	-62	CGI	TRUE	FALSE	FALSE
cg21656520	chr2	210867290	210867291	RPE	6120	-60	CGI	TRUE	FALSE	FALSE
cg21680645	chr2	241513716	241513717	RNPEPL1	57140	5711	CGI-S-Shore	TRUE	TRUE	FALSE
cg21711862	chr2	554363	554364	TMEM18	129787	123074	CGI-N-Shelf	FALSE	FALSE	TRUE
cg21755633	chr2	65357763	65357764	RAB1A	5861	-327	CGI	TRUE	FALSE	FALSE
cg21949518	chr2	264910	264911	ACP1	52	40	CGI	TRUE	FALSE	FALSE
cg22028161	chr2	95658954	95658955	MAL	4118	-32523	CGI	FALSE	FALSE	TRUE
cg22052672	chr2	74663416	74663417	RTKN	6242	5642	CGI	FALSE	TRUE	FALSE
cg22076123	chr2	170282921	170282922	KLHL41	10324	-53083	CGI	FALSE	FALSE	TRUE
cg22109000	chr2	69664724	69664725	NFU1	27247	34	CGI	TRUE	FALSE	FALSE
cg22197434	chr2	60781217	60781218	BCL11A	53335	-583	CGI	TRUE	FALSE	FALSE
cg22331108	chr2	232478452	232478453	C2orf57	165100	20876	CGI	FALSE	FALSE	TRUE
cg22374586	chr2	232220566	232220567	MIR4777	100616317	-6851	Non-CGI	FALSE	TRUE	FALSE
cg22386389	chr2	238707268	238707269	RBM44	375316	-118	CGI	TRUE	FALSE	FALSE
cg22399232	chr2	33824342	33824343	FAM98A	25940	18	CGI	TRUE	FALSE	FALSE
cg22411710	chr2	98280854	98280855	ACTR1B	10120	-292	CGI	TRUE	FALSE	FALSE
cg22439777	chr2	200776285	200776286	C2orf69	205327	305	CGI	TRUE	FALSE	FALSE
cg22470850	chr2	26395824	26395825	GAREML	150946	-134	CGI	TRUE	FALSE	FALSE
cg22472148	chr2	220435908	220435909	OBSL1	23363	358	CGI	TRUE	FALSE	FALSE
cg22475904	chr2	74734609	74734610	PCGF1	84759	210	CGI	TRUE	TRUE	FALSE
cg22549881	chr2	31806898	31806899	SRD5A2	6716	-857	CGI	TRUE	FALSE	FALSE
cg22593554	chr2	128990739	128990740	HS6ST1	9394	85430	CGI	FALSE	FALSE	TRUE
cg22732812	chr2	27717801	27717802	FNDC4	64838	323	CGI	TRUE	FALSE	FALSE
cg22860601	chr2	171627721	171627722	GAD1	2571	-45477	CGI	TRUE	FALSE	FALSE
cg22929802	chr2	30369763	30369764	YPEL5	51646	12	CGI	TRUE	FALSE	FALSE
cg22944632	chr2	63277684	63277685	OTX1	5013	491	CGI	TRUE	TRUE	FALSE
cg22948335	chr2	70475902	70475903	TIA1	7072	-122	CGI	TRUE	FALSE	FALSE
cg22971415	chr2	88355312	88355313	KRCC1	51315	-63	CGI	TRUE	FALSE	FALSE
cg23012552	chr2	196522377	196522378	SLC39A10	57181	844	CGI	FALSE	TRUE	FALSE
cg23041619	chr2	27435357	27435358	SLC5A6	8884	-181	CGI	TRUE	TRUE	FALSE
cg23054112	chr2	204400194	204400195	RAPH1	65059	-135	CGI	TRUE	FALSE	FALSE
cg23079012	chr2	8343710	8343711	LINC00299	339789	124837	Non-CGI	FALSE	TRUE	FALSE
cg23081331	chr2	70475998	70475999	TIA1	7072	-218	CGI	TRUE	FALSE	FALSE
cg23136645	chr2	1418073	1418074	TPO	7173	40077	Non-CGI	TRUE	TRUE	FALSE
cg23201549	chr2	43454852	43454853	LOC100129726	100129726	501	CGI	TRUE	FALSE	FALSE
cg23206888	chr2	242833114	242833115	CXXC11	285093	21227	CGI	FALSE	FALSE	TRUE
cg23212579	chr2	219256018	219256019	CTDSP1	58190	-7041	CGI	FALSE	TRUE	FALSE
cg23227555	chr2	3523215	3523216	ADI1	55256	133	CGI	TRUE	FALSE	FALSE
cg23239637	chr2	1507832	1507833	TPO	7173	129836	CGI	FALSE	TRUE	FALSE
cg23246666	chr2	236672684	236672685	AGAP1	116987	269950	CGI	FALSE	TRUE	FALSE
cg23322531	chr2	8821658	8821659	ID2	3398	-453	CGI	TRUE	FALSE	FALSE
cg23338753	chr2	1895908	1895909	PXDN	7837	-147616	CGI	FALSE	TRUE	FALSE
cg23340613	chr2	37311651	37311652	GPATCH11	253635	56	CGI	TRUE	FALSE	FALSE
cg23393521	chr2	171571097	171571098	LOC440925	440925	-19	CGI	TRUE	FALSE	FALSE
cg23468897	chr2	178937598	178937599	PDE11A	50940	35466	CGI	TRUE	TRUE	FALSE
cg23475109	chr2	97530683	97530684	SEMA4C	54910	5050	CGI-S-Shelf	TRUE	TRUE	FALSE
cg23587288	chr2	27483067	27483068	SLC30A3	7781	15119	CGI-N-Shore	TRUE	TRUE	FALSE
cg23665973	chr2	219757534	219757535	WNT10A	80326	12278	CGI	FALSE	TRUE	FALSE
cg23898827	chr2	122096183	122096184	TFCP2L1	29842	-53404	Non-CGI	FALSE	TRUE	FALSE
cg24055349	chr2	63816074	63816075	WDPCP	51057	-206	CGI	TRUE	FALSE	FALSE
cg24066980	chr2	1864151	1864152	PXDN	7837	-115859	CGI	FALSE	TRUE	FALSE
cg24171337	chr2	105946028	105946029	TGFBRAP1	9392	118	CGI	FALSE	TRUE	FALSE
cg24347594	chr2	45236743	45236744	SIX2	10736	-200	CGI	TRUE	FALSE	FALSE
cg24424615	chr2	219537140	219537141	RNF25	64320	-358	CGI-S-Shore	TRUE	TRUE	FALSE
cg24539668	chr2	47499521	47499522	C2orf61	285051	-95780	CGI	FALSE	TRUE	FALSE
cg24614854	chr2	65356625	65356626	RAB1A	5861	808	CGI-N-Shore	FALSE	TRUE	FALSE
cg24666733	chr2	242089739	242089740	PASK	23178	-344	CGI	TRUE	TRUE	FALSE
cg24703390	chr2	222438965	222438966	EPHA4	2043	-1954	CGI	TRUE	FALSE	FALSE
cg24704405	chr2	30914938	30914939	CAPN13	92291	115371	Non-CGI	FALSE	FALSE	TRUE
cg24717024	chr2	20101884	20101885	TTC32	130502	-139	CGI	TRUE	FALSE	FALSE
cg24757850	chr2	241477887	241477888	DUSP28	285193	-21582	CGI	FALSE	TRUE	FALSE
cg24797187	chr2	100175768	100175769	REV1	51455	-69287	Non-CGI	FALSE	TRUE	FALSE
cg24886176	chr2	70142158	70142159	MXD1	4084	-13	CGI	TRUE	FALSE	FALSE
cg24913324	chr2	65215472	65215473	SLC1A4	6509	-105	CGI	TRUE	FALSE	FALSE
cg24935135	chr2	62900312	62900313	EHBP1	23301	-672	Non-CGI	TRUE	FALSE	FALSE
cg24987806	chr2	209130885	209130886	PIKFYVE	200576	-104	CGI	TRUE	FALSE	FALSE
cg25098707	chr2	220042932	220042933	FAM134A	79137	-5	CGI	TRUE	FALSE	FALSE
cg25101500	chr2	42588340	42588341	COX7A2L	9167	7808	CGI	TRUE	TRUE	FALSE
cg25102919	chr2	128615792	128615793	POLR2D	5433	-62	CGI	TRUE	FALSE	FALSE
cg25137403	chr2	177022172	177022173	HOXD4	3233	6058	CGI	FALSE	FALSE	TRUE
cg25181651	chr2	1748132	1748133	PXDN	7837	157	CGI	TRUE	FALSE	FALSE
cg25237894	chr2	233734115	233734116	C2orf82	389084	-877	Non-CGI	TRUE	FALSE	FALSE
cg25240468	chr2	62115958	62115959	CCT4	10575	-166	CGI	TRUE	FALSE	FALSE
cg25250853	chr2	85822726	85822727	RNF181	51255	-109	CGI	TRUE	FALSE	FALSE
cg25253773	chr2	74942436	74942437	SEMA4F	10505	61042	CGI	FALSE	FALSE	TRUE
cg25301406	chr2	230578708	230578709	DNER	92737	576	CGI	FALSE	TRUE	FALSE
cg25332377	chr2	219906256	219906257	CCDC108	255101	-10	CGI	TRUE	FALSE	FALSE
cg25353287	chr2	42277667	42277668	PKDCC	91461	2505	CGI-S-Shore	FALSE	TRUE	FALSE
cg25377178	chr2	232651151	232651152	COPS7B	64708	4705	CGI	TRUE	TRUE	FALSE
cg25411110	chr2	178077324	178077325	HNRNPA3	220988	-96	CGI	TRUE	FALSE	FALSE
cg25417298	chr2	122406472	122406473	CLASP1	23332	578	CGI	TRUE	TRUE	FALSE
cg25423732	chr2	218837974	218837975	TNS1	7145	29742	Non-CGI	FALSE	TRUE	FALSE
cg25492097	chr2	220495954	220495955	SLC4A3	6508	3661	CGI-S-Shelf	TRUE	TRUE	FALSE
cg25730564	chr2	236100751	236100752	SH3BP4	23677	240122	Non-CGI	FALSE	FALSE	TRUE
cg25810938	chr2	241497060	241497061	DUSP28	285193	-2409	CGI	FALSE	TRUE	FALSE
cg25828259	chr2	47918397	47918398	MSH6	2956	-91822	CGI	FALSE	FALSE	TRUE
cg25840208	chr2	31457043	31457044	EHD3	30845	162	CGI	TRUE	FALSE	FALSE
cg26084700	chr2	231693479	231693480	ITM2C	81618	-36140	CGI	FALSE	FALSE	TRUE
cg26095266	chr2	10262787	10262788	RRM2	6241	91	CGI	TRUE	FALSE	FALSE
cg26117622	chr2	242042254	242042255	MTERFD2	130916	-506	CGI-S-Shore	TRUE	FALSE	FALSE
cg26154974	chr2	128848828	128848829	UGGT1	56886	73	CGI	TRUE	FALSE	FALSE
cg26161045	chr2	55277080	55277081	RTN4	57142	652	CGI	TRUE	FALSE	FALSE
cg26230390	chr2	203130314	203130315	NOP58	51602	-199	CGI-N-Shore	TRUE	FALSE	FALSE
cg26360792	chr2	43019997	43019998	HAAO	23498	-245	CGI	TRUE	FALSE	FALSE
cg26381592	chr2	190649278	190649279	ORMDL1	94101	-180	CGI	TRUE	FALSE	FALSE
cg26447968	chr2	74682200	74682201	INO80B-WBP1	100532735	49	CGI	TRUE	FALSE	FALSE
cg26528459	chr2	174146545	174146546	MLK7-AS1	339751	217	CGI-N-Shore	TRUE	FALSE	FALSE
cg26529376	chr2	96012328	96012329	KCNIP3	30818	49255	CGI	TRUE	TRUE	FALSE
cg26537478	chr2	66668012	66668013	MEIS1	4211	5479	CGI	FALSE	TRUE	FALSE
cg26580609	chr2	18766140	18766141	NT5C1B-RDH14	100526794	4704	CGI	TRUE	TRUE	FALSE
cg26608203	chr2	97173877	97173878	NEURL3	93082	-30	CGI	TRUE	FALSE	FALSE
cg26667720	chr2	219773728	219773729	WNT10A	80326	28472	CGI	FALSE	TRUE	FALSE
cg26670245	chr2	170551352	170551353	PHOSPHO2-KLHL23	100526832	387	CGI-S-Shore	TRUE	TRUE	FALSE
cg26820055	chr2	131721099	131721100	ARHGEF4	50649	48312	CGI	FALSE	TRUE	FALSE
cg26837570	chr2	74710667	74710668	CCDC142	84865	-309	CGI-S-Shore	TRUE	TRUE	FALSE
cg26876664	chr2	240302637	240302638	HDAC4	9759	20707	CGI	FALSE	TRUE	FALSE
cg26879788	chr2	238330297	238330298	COL6A3	1293	-7446	Non-CGI	FALSE	FALSE	TRUE
cg26913798	chr2	240091029	240091030	MGC16025	85009	26122	CGI	FALSE	TRUE	FALSE
cg27007625	chr2	240896183	240896184	MIR4786	100616417	-13671	CGI	FALSE	FALSE	TRUE
cg27114661	chr2	242255285	242255286	HDLBP	3069	-169	CGI	TRUE	TRUE	FALSE
cg27256565	chr2	33952488	33952489	MYADML	151325	794	CGI	TRUE	FALSE	FALSE
cg27310163	chr2	113342241	113342242	CHCHD5	84269	204	CGI	FALSE	TRUE	FALSE
cg27343456	chr2	39471182	39471183	CDKL4	344387	-14508	CGI	FALSE	FALSE	TRUE
cg27361397	chr2	97426627	97426628	CNNM4	26504	-10	CGI	TRUE	FALSE	FALSE
cg27404023	chr2	162283994	162283995	TBR1	10716	11373	CGI	FALSE	FALSE	TRUE
cg27476576	chr2	121103029	121103030	INHBB	3625	-688	CGI	TRUE	FALSE	FALSE
cg27477610	chr2	95787254	95787255	MRPS5	64969	498	CGI	FALSE	TRUE	FALSE
cg27598195	chr2	25148746	25148747	ADCY3	109	-6690	CGI	FALSE	FALSE	TRUE
cg00025647	chr3	147077127	147077128	ZIC4	84107	47467	CGI-S-Shore	FALSE	FALSE	TRUE
cg00031303	chr3	195681400	195681401	SDHAP1	255812	35748	CGI	FALSE	FALSE	TRUE
cg00097940	chr3	197476561	197476562	KIAA0226	9711	5	CGI	TRUE	TRUE	FALSE
cg00134776	chr3	139653573	139653574	CLSTN2	64084	-452	CGI	TRUE	FALSE	FALSE
cg00168009	chr3	194980766	194980767	XXYLT1	152002	11127	CGI	FALSE	TRUE	FALSE
cg00225902	chr3	66444122	66444123	LRIG1	26018	106721	Non-CGI	FALSE	TRUE	FALSE
cg00376019	chr3	52931306	52931307	TMEM110-MUSTN1	100526772	289	CGI	TRUE	TRUE	FALSE
cg00386925	chr3	71380367	71380368	MIR1284	100302112	210871	CGI-N-Shore	FALSE	TRUE	FALSE
cg00501421	chr3	58291814	58291815	RPP14	11102	-156	CGI-N-Shore	TRUE	FALSE	FALSE
cg00504134	chr3	152552530	152552531	P2RY1	5028	-204	CGI	TRUE	FALSE	FALSE
cg00627788	chr3	196296266	196296267	FBXO45	200933	540	CGI	TRUE	TRUE	FALSE
cg00757731	chr3	66024991	66024992	MAGI1	9223	-481	CGI	TRUE	FALSE	FALSE
cg00801868	chr3	155588370	155588371	GMPS	8833	44	CGI	TRUE	FALSE	FALSE
cg00836482	chr3	119528956	119528957	NR1I2	8856	29624	CGI	TRUE	TRUE	FALSE
cg01029676	chr3	122785968	122785969	PDIA5	10954	111	CGI	TRUE	FALSE	FALSE
cg01106040	chr3	126194903	126194904	ZXDC	79364	-140	CGI	TRUE	FALSE	FALSE
cg01132975	chr3	98312544	98312545	CPOX	1371	-88	CGI	TRUE	FALSE	FALSE
cg01143375	chr3	191670642	191670643	PYDC2	152138	491689	CGI	FALSE	FALSE	TRUE
cg01216369	chr3	172859022	172859023	SPATA16	83893	34	Non-CGI	TRUE	FALSE	FALSE
cg01228352	chr3	150329615	150329616	SELT	51714	8548	CGI	FALSE	TRUE	FALSE
cg01398050	chr3	19189456	19189457	KCNH8	131096	-559	CGI	TRUE	FALSE	FALSE
cg01448194	chr3	20049624	20049625	PP2D1	151649	4139	Non-CGI	FALSE	TRUE	FALSE
cg01534217	chr3	71632920	71632921	FOXP1	27086	218	CGI	TRUE	TRUE	FALSE
cg01635475	chr3	167813467	167813468	GOLIM4	27333	-49	CGI	TRUE	FALSE	FALSE
cg01829450	chr3	135914745	135914746	MSL2	55167	-56	CGI	TRUE	FALSE	FALSE
cg01895333	chr3	109035405	109035406	DPPA2	151871	-40	Non-CGI	TRUE	FALSE	FALSE
cg01901898	chr3	113465629	113465630	ATP6V1A	523	-235	CGI	TRUE	FALSE	FALSE
cg01915044	chr3	196045222	196045223	TCTEX1D2	255758	-56	CGI	TRUE	TRUE	FALSE
cg01945562	chr3	145879277	145879278	PLOD2	5352	3	CGI	TRUE	FALSE	FALSE
cg01946530	chr3	173116046	173116047	NLGN1	22871	-196	CGI	TRUE	FALSE	FALSE
cg01954930	chr3	94656939	94656940	LOC255025	255025	-166	CGI	TRUE	FALSE	FALSE
cg02109726	chr3	87040308	87040309	VGLL3	389136	-50	CGI	TRUE	FALSE	FALSE
cg02215960	chr3	50607131	50607132	HEMK1	51409	547	CGI	TRUE	TRUE	FALSE
cg02510164	chr3	183146421	183146422	MCF2L2	23101	-565	CGI	TRUE	FALSE	FALSE
cg02564102	chr3	47823614	47823615	SMARCC1	6599	-17	CGI	TRUE	FALSE	FALSE
cg02636222	chr3	48956935	48956936	ARIH2OS	646450	-116	CGI	TRUE	TRUE	FALSE
cg02641517	chr3	54169983	54169984	CACNA2D3	55799	13289	Non-CGI	FALSE	TRUE	FALSE
cg02692441	chr3	71179703	71179704	MIR1284	100302112	411535	Non-CGI	TRUE	TRUE	FALSE
cg02716516	chr3	45838074	45838075	SLC6A20	54716	-38	CGI	TRUE	FALSE	FALSE
cg02721184	chr3	9834899	9834900	TADA3	10474	-203	CGI	TRUE	TRUE	FALSE
cg02728748	chr3	135913490	135913491	MSL2	55167	1196	CGI	TRUE	TRUE	FALSE
cg02826439	chr3	120004267	120004268	GPR156	165829	-40941	CGI	FALSE	FALSE	TRUE
cg02836020	chr3	183145946	183145947	MCF2L2	23101	-90	CGI	TRUE	FALSE	FALSE
cg02904838	chr3	187871519	187871520	LPP	4026	-142	CGI	TRUE	FALSE	FALSE
cg02980693	chr3	128208970	128208971	GATA2	2624	3058	CGI	TRUE	TRUE	FALSE
cg03037622	chr3	51430415	51430416	RBM15B	29890	1715	CGI	TRUE	FALSE	FALSE
cg03060546	chr3	49711283	49711284	APEH	327	-150	CGI	TRUE	FALSE	FALSE
cg03336678	chr3	40547435	40547436	ZNF620	253639	-93	CGI	TRUE	FALSE	FALSE
cg03387092	chr3	123493248	123493249	MYLK	4638	109899	Non-CGI	FALSE	TRUE	FALSE
cg03470180	chr3	184210101	184210102	EPHB3	2049	-69484	CGI	FALSE	FALSE	TRUE
cg03477080	chr3	46448920	46448921	CCRL2	9034	198	Non-CGI	TRUE	FALSE	FALSE
cg03522824	chr3	119187686	119187687	POGLUT1	56983	-97	CGI-N-Shore	TRUE	FALSE	FALSE
cg03648908	chr3	4805550	4805551	EGOT	100126791	-12275	CGI	FALSE	TRUE	FALSE
cg03795608	chr3	127872288	127872289	EEFSEC	60678	-23	CGI	TRUE	FALSE	FALSE
cg03800765	chr3	11313984	11313985	ATG7	10533	-24	CGI	TRUE	FALSE	FALSE
cg03826463	chr3	186211670	186211671	LOC253573	253573	-219	CGI	TRUE	FALSE	FALSE
cg03851645	chr3	38071166	38071167	PLCD1	5333	-11	CGI	TRUE	FALSE	FALSE
cg04016160	chr3	194304935	194304936	TMEM44	93109	49481	CGI	FALSE	FALSE	TRUE
cg04062383	chr3	179370420	179370421	USP13	8975	-511	CGI	TRUE	FALSE	FALSE
cg04226394	chr3	63898734	63898735	ATXN7	6314	48500	CGI	FALSE	TRUE	FALSE
cg04244215	chr3	66551541	66551542	LRIG1	26018	-695	CGI	TRUE	FALSE	FALSE
cg04397547	chr3	165636576	165636577	BCHE	590	-81322	CGI	FALSE	FALSE	TRUE
cg04408595	chr3	71802608	71802609	GPR27	2850	-591	CGI	TRUE	TRUE	FALSE
cg04424605	chr3	149939210	149939211	TSC22D2	9819	-187576	CGI	FALSE	FALSE	TRUE
cg04465185	chr3	194189924	194189925	ATP13A3	79572	-955	Non-CGI	TRUE	FALSE	FALSE
cg04533487	chr3	132379626	132379627	ACAD11	84129	-650	CGI	TRUE	TRUE	FALSE
cg04798497	chr3	156273025	156273026	SSR3	6747	-51	CGI	TRUE	FALSE	FALSE
cg04837898	chr3	45731254	45731255	SACM1L	22908	499	CGI	TRUE	TRUE	FALSE
cg04843801	chr3	42642061	42642062	NKTR	4820	-84	CGI	TRUE	TRUE	FALSE
cg05048199	chr3	33319000	33319001	FBXL2	25827	65	CGI	TRUE	FALSE	FALSE
cg05106206	chr3	51429142	51429143	RBM15B	29890	442	CGI	TRUE	FALSE	FALSE
cg05404618	chr3	105587719	105587720	CBLB	868	545	CGI	TRUE	TRUE	FALSE
cg05547562	chr3	128780916	128780917	GP9	2815	1270	CGI	TRUE	TRUE	FALSE
cg05711928	chr3	132136352	132136353	DNAJC13	23317	-199	CGI	TRUE	FALSE	FALSE
cg05789005	chr3	196696511	196696512	PIGZ	80235	-806	CGI	TRUE	FALSE	FALSE
cg05888082	chr3	108308525	108308526	KIAA1524	57650	-33	CGI	TRUE	FALSE	FALSE
cg05889842	chr3	150421699	150421700	FAM194A	131831	41	CGI	TRUE	FALSE	FALSE
cg05906740	chr3	37035205	37035206	MLH1	4292	363	CGI	TRUE	TRUE	FALSE
cg05971592	chr3	64895105	64895106	MIR548A2	693126	189421	Non-CGI	FALSE	TRUE	FALSE
cg06151625	chr3	23957967	23957968	RPL15	6138	-326	CGI-N-Shore	TRUE	TRUE	FALSE
cg06208339	chr3	139258658	139258659	RBP1	5947	11	CGI	TRUE	FALSE	FALSE
cg06212498	chr3	49045151	49045152	WDR6	11180	513	CGI	FALSE	TRUE	FALSE
cg06318592	chr3	47517621	47517622	SCAP	22937	-175	CGI	TRUE	FALSE	FALSE
cg06348477	chr3	119217354	119217355	TIMMDC1	51300	-12	CGI	TRUE	FALSE	FALSE
cg06643567	chr3	54068019	54068020	CACNA2D3	55799	-88672	Non-CGI	FALSE	FALSE	TRUE
cg06667416	chr3	186501294	186501295	EIF4A2	1974	-65	CGI	TRUE	FALSE	FALSE
cg06787431	chr3	185827293	185827294	ETV5	2119	-391	CGI	TRUE	FALSE	FALSE
cg06804344	chr3	128778699	128778700	GP9	2815	-944	CGI-N-Shelf	TRUE	FALSE	FALSE
cg06911020	chr3	39851123	39851124	MYRIP	25924	-178	CGI	TRUE	FALSE	FALSE
cg07101782	chr3	37034495	37034496	EPM2AIP1	9852	298	CGI	TRUE	FALSE	FALSE
cg07130869	chr3	28283173	28283174	CMC1	152100	48	CGI	TRUE	FALSE	FALSE
cg07131136	chr3	15417170	15417171	SH3BP5	9467	-34268	Non-CGI	FALSE	FALSE	TRUE
cg07155478	chr3	197283151	197283152	BDH1	622	17041	CGI-S-Shore	TRUE	TRUE	FALSE
cg07184411	chr3	122400006	122400007	PARP14	54625	333	CGI	FALSE	TRUE	FALSE
cg07303187	chr3	126194934	126194935	ZXDC	79364	-171	CGI	TRUE	FALSE	FALSE
cg07341007	chr3	195489909	195489910	MUC20	200958	42155	CGI	FALSE	TRUE	FALSE
cg07365816	chr3	153839000	153839001	ARHGEF26-AS1	100507524	0	CGI	TRUE	FALSE	FALSE
cg07377586	chr3	122283313	122283314	DTX3L	151636	127	CGI	TRUE	FALSE	FALSE
cg07413251	chr3	27771667	27771668	EOMES	8320	-7460	CGI	FALSE	FALSE	TRUE
cg07588141	chr3	105588208	105588209	CBLB	868	56	CGI	TRUE	FALSE	FALSE
cg07618626	chr3	32726534	32726535	CNOT10	25904	-162	CGI-N-Shore	TRUE	FALSE	FALSE
cg07662771	chr3	64008007	64008008	PSMD6	9861	1649	CGI-N-Shore	TRUE	TRUE	FALSE
cg07731455	chr3	14220336	14220337	LSM3	27258	107	CGI	TRUE	FALSE	FALSE
cg07780856	chr3	183967543	183967544	ECE2	9718	97	CGI	TRUE	FALSE	FALSE
cg07805724	chr3	69062774	69062775	EOGT	285203	0	CGI	TRUE	FALSE	FALSE
cg08026502	chr3	196366437	196366438	LRRC33	375387	-217	CGI	TRUE	FALSE	FALSE
cg08060454	chr3	137487932	137487933	SOX14	8403	4797	CGI	FALSE	FALSE	TRUE
cg08066943	chr3	147136922	147136923	ZIC1	7545	9740	CGI	FALSE	FALSE	TRUE
cg08084454	chr3	176915592	176915593	TBL1XR1	79718	-543	CGI	TRUE	FALSE	FALSE
cg08093226	chr3	48754594	48754595	IP6K2	51447	324	CGI	TRUE	FALSE	FALSE
cg08143003	chr3	105086143	105086144	ALCAM	214	585	CGI	TRUE	FALSE	FALSE
cg08175029	chr3	23848512	23848513	UBE2E1	7324	1127	CGI	FALSE	TRUE	FALSE
cg08219531	chr3	72495966	72495967	RYBP	23429	-191	CGI	TRUE	FALSE	FALSE
cg08536228	chr3	63264063	63264064	SYNPR	132204	148	CGI	TRUE	FALSE	FALSE
cg08688006	chr3	39222345	39222346	XIRP1	165904	11738	CGI	FALSE	FALSE	TRUE
cg08768852	chr3	69591633	69591634	FRMD4B	23150	98	CGI	TRUE	FALSE	FALSE
cg08806444	chr3	5163989	5163990	ARL8B	55207	58	CGI	TRUE	FALSE	FALSE
cg08830818	chr3	122514143	122514144	DIRC2	84925	241	CGI	TRUE	FALSE	FALSE
cg08839267	chr3	132757973	132757974	TMEM108	66000	801	CGI-S-Shore	FALSE	TRUE	FALSE
cg08858437	chr3	142838938	142838939	CHST2	9435	319	CGI	TRUE	FALSE	FALSE
cg08929133	chr3	186330026	186330027	AHSG	197	-822	Non-CGI	TRUE	FALSE	FALSE
cg08980237	chr3	156534860	156534861	LOC730091	730091	-8	CGI	TRUE	FALSE	FALSE
cg09008417	chr3	42814854	42814855	CCDC13	152206	-108	CGI	TRUE	FALSE	FALSE
cg09331640	chr3	150264376	150264377	EIF2A	83939	-196	CGI	TRUE	TRUE	FALSE
cg09380805	chr3	169384034	169384035	MECOM	2122	-2470	CGI-N-Shore	FALSE	FALSE	TRUE
cg09386682	chr3	10207069	10207070	IRAK2	3656	505	CGI-S-Shore	FALSE	TRUE	FALSE
cg09434670	chr3	47620543	47620544	CSPG5	10675	1185	CGI	TRUE	TRUE	FALSE
cg09456388	chr3	37284959	37284960	GOLGA4	2803	276	CGI	TRUE	FALSE	FALSE
cg09459719	chr3	141594525	141594526	ATP1B3	483	-943	CGI	TRUE	FALSE	FALSE
cg09628877	chr3	195613739	195613740	TNK2	10188	25075	CGI	TRUE	TRUE	FALSE
cg09717471	chr3	175338908	175338909	MIR4789	100616395	251578	CGI	FALSE	TRUE	FALSE
cg09723533	chr3	128968410	128968411	COPG1	22820	-41	CGI	TRUE	FALSE	FALSE
cg09847443	chr3	66595364	66595365	LRIG1	26018	-44518	CGI	FALSE	FALSE	TRUE
cg10130344	chr3	197676815	197676816	RPL35A	6165	-235	CGI	TRUE	TRUE	FALSE
cg10132987	chr3	171757307	171757308	FNDC3B	64778	-109	CGI	TRUE	FALSE	FALSE
cg10455785	chr3	13521860	13521861	HDAC11	79885	635	CGI	TRUE	TRUE	FALSE
cg10523996	chr3	126423120	126423121	CHCHD6	84303	1	CGI	TRUE	FALSE	FALSE
cg10546523	chr3	50310484	50310485	SEMA3B	7869	5443	CGI	TRUE	TRUE	FALSE
cg10596006	chr3	49711089	49711090	APEH	327	-344	CGI	TRUE	FALSE	FALSE
cg10666906	chr3	37284460	37284461	GOLGA4	2803	-220	CGI	TRUE	FALSE	FALSE
cg10681256	chr3	47324572	47324573	KIF9	64147	-234	CGI	TRUE	FALSE	FALSE
cg10683958	chr3	9885602	9885603	RPUSD3	285367	98	CGI	TRUE	TRUE	FALSE
cg10741399	chr3	113251979	113251980	SIDT1	54847	760	CGI	TRUE	FALSE	FALSE
cg10901258	chr3	135913734	135913735	MSL2	55167	952	CGI	TRUE	TRUE	FALSE
cg10943458	chr3	120627085	120627086	STXBP5L	9515	34	CGI	TRUE	FALSE	FALSE
cg11094012	chr3	100428140	100428141	TFG	10342	5	CGI	TRUE	FALSE	FALSE
cg11143158	chr3	113557646	113557647	GRAMD1C	54762	10616	CGI	TRUE	TRUE	FALSE
cg11203156	chr3	125314216	125314217	OSBPL11	114885	163	CGI	TRUE	FALSE	FALSE
cg11431257	chr3	143692087	143692088	C3orf58	205428	1446	CGI	TRUE	TRUE	FALSE
cg11600697	chr3	37034814	37034815	EPM2AIP1	9852	-18	CGI	TRUE	FALSE	FALSE
cg11605617	chr3	32612461	32612462	DYNC1LI1	51143	-94	CGI	TRUE	FALSE	FALSE
cg11843799	chr3	50297388	50297389	SEMA3B	7869	-7650	CGI-N-Shore	TRUE	FALSE	FALSE
cg12105765	chr3	183947332	183947333	VWA5B2	90113	-983	CGI	TRUE	FALSE	FALSE
cg12177207	chr3	159943101	159943102	C3orf80	401097	-320	CGI	TRUE	FALSE	FALSE
cg12386194	chr3	101231763	101231764	SENP7	57337	320	CGI	FALSE	TRUE	FALSE
cg12430824	chr3	128145533	128145534	DNAJB8-AS1	285224	-36902	CGI	FALSE	FALSE	TRUE
cg12525224	chr3	5229201	5229202	EDEM1	9695	-128	CGI	TRUE	FALSE	FALSE
cg12591404	chr3	5020859	5020860	BHLHE40	8553	-236	CGI	TRUE	TRUE	FALSE
cg12691230	chr3	46064611	46064612	XCR1	2829	4366	CGI-S-Shore	TRUE	TRUE	FALSE
cg12786945	chr3	13324760	13324761	NUP210	23225	137047	CGI	FALSE	FALSE	TRUE
cg12817999	chr3	9438877	9438878	SETD5-AS1	440944	295	CGI	TRUE	TRUE	FALSE
cg12843448	chr3	193789466	193789467	HES1	3280	-64463	CGI-S-Shore	FALSE	FALSE	TRUE
cg12903374	chr3	15643321	15643322	BTD	686	180	CGI	TRUE	TRUE	FALSE
cg13147822	chr3	168864313	168864314	MECOM	2122	517248	CGI	TRUE	TRUE	FALSE
cg13234732	chr3	180547932	180547933	FXR1	8087	-82300	CGI	FALSE	TRUE	FALSE
cg13334304	chr3	23631338	23631339	UBE2E1	7324	-216044	Non-CGI	FALSE	TRUE	FALSE
cg13409248	chr3	40428643	40428644	ENTPD3	956	-28	CGI	TRUE	FALSE	FALSE
cg13422008	chr3	111697794	111697795	ABHD10	55347	-32	CGI	TRUE	FALSE	FALSE
cg13512580	chr3	127309512	127309513	TPRA1	131601	54	CGI	TRUE	FALSE	FALSE
cg13607248	chr3	183874556	183874557	DVL3	1857	1271	CGI-S-Shore	TRUE	TRUE	FALSE
cg13680844	chr3	52255405	52255406	TLR9	54106	9840	CGI	FALSE	TRUE	FALSE
cg13736369	chr3	46775569	46775570	PRSS46	100287362	2350	Non-CGI	TRUE	TRUE	FALSE
cg13803214	chr3	150804490	150804491	MED12L	116931	1038	CGI	TRUE	TRUE	FALSE
cg14216142	chr3	138313050	138313051	CEP70	80321	77	CGI	TRUE	FALSE	FALSE
cg14637144	chr3	196750506	196750507	MFI2	4241	6179	CGI	FALSE	TRUE	FALSE
cg14671526	chr3	37035200	37035201	MLH1	4292	358	CGI	TRUE	TRUE	FALSE
cg14697246	chr3	48487981	48487982	ATRIP	84126	-158	CGI	TRUE	FALSE	FALSE
cg14847243	chr3	184104362	184104363	CHRD	8646	6500	CGI	FALSE	TRUE	FALSE
cg14877820	chr3	16306698	16306699	OXNAD1	92106	30	CGI	TRUE	FALSE	FALSE
cg14981232	chr3	128997662	128997663	C3orf37	56941	-20	CGI	TRUE	FALSE	FALSE
cg15092395	chr3	33155457	33155458	CRTAP	10491	6	CGI	TRUE	FALSE	FALSE
cg15159420	chr3	195545327	195545328	MUC4	4585	-6482	CGI	FALSE	FALSE	TRUE
cg15175194	chr3	113775337	113775338	KIAA1407	57577	121	CGI	TRUE	FALSE	FALSE
cg15229124	chr3	139258912	139258913	RBP1	5947	-240	CGI	TRUE	FALSE	FALSE
cg15602053	chr3	138635064	138635065	FOXL2	668	30916	CGI	FALSE	FALSE	TRUE
cg15730967	chr3	12856795	12856796	CAND2	23066	18623	CGI	FALSE	TRUE	FALSE
cg15965542	chr3	10547373	10547374	MIR885	100126334	-111126	CGI	TRUE	TRUE	FALSE
cg16034541	chr3	195490309	195490310	MUC20	200958	42555	CGI-S-Shore	FALSE	TRUE	FALSE
cg16188349	chr3	61656617	61656618	PTPRG	5793	109373	CGI-N-Shore	FALSE	TRUE	FALSE
cg16204700	chr3	133292376	133292377	CDV3	55573	-56	CGI	TRUE	FALSE	FALSE
cg16216311	chr3	50305083	50305084	SEMA3B	7869	42	Non-CGI	TRUE	FALSE	FALSE
cg16305746	chr3	197236368	197236369	BDH1	622	63824	CGI-N-Shore	FALSE	FALSE	TRUE
cg16311339	chr3	180397336	180397337	CCDC39	339829	58324	CGI	TRUE	TRUE	FALSE
cg16374319	chr3	37876385	37876386	CTDSPL	10217	-27282	Non-CGI	FALSE	TRUE	FALSE
cg16529883	chr3	50191944	50191945	SEMA3F	6405	-902	CGI-N-Shore	TRUE	TRUE	FALSE
cg16618282	chr3	47018402	47018403	CCDC12	151903	-131	CGI	TRUE	FALSE	FALSE
cg16625000	chr3	184081092	184081093	POLR2H	5437	-100	CGI	TRUE	FALSE	FALSE
cg16661554	chr3	181420020	181420021	SOX2	6657	-9690	CGI	FALSE	TRUE	FALSE
cg16755393	chr3	48130818	48130819	MAP4	4134	-48	CGI	TRUE	FALSE	FALSE
cg16909408	chr3	134125688	134125689	MIR4788	100616281	-30979	CGI	FALSE	FALSE	TRUE
cg17171325	chr3	10052813	10052814	LOC401052	401052	-33	CGI	TRUE	TRUE	FALSE
cg17215036	chr3	48129188	48129189	MAP4	4134	1579	CGI-N-Shore	FALSE	TRUE	FALSE
cg17281763	chr3	48594394	48594395	PFKFB4	5210	4166	CGI	TRUE	TRUE	FALSE
cg17392043	chr3	188495102	188495103	TPRG1	285386	-169899	Non-CGI	FALSE	TRUE	FALSE
cg17462381	chr3	132441365	132441366	NPHP3	27031	-61	CGI	TRUE	TRUE	FALSE
cg17572056	chr3	195947062	195947063	SLC51A	200931	3678	CGI	FALSE	TRUE	FALSE
cg17621718	chr3	42306737	42306738	CCK	885	923	CGI	TRUE	TRUE	FALSE
cg17631972	chr3	134032303	134032304	AMOTL2	51421	61954	CGI	FALSE	FALSE	TRUE
cg17663253	chr3	195622522	195622523	TNK2	10188	16292	CGI	TRUE	TRUE	FALSE
cg17815252	chr3	142838682	142838683	CHST2	9435	63	CGI	TRUE	FALSE	FALSE
cg17877494	chr3	38178256	38178257	ACAA1	30	475	CGI	TRUE	TRUE	FALSE
cg18060685	chr3	50329850	50329851	IFRD2	7866	497	CGI	TRUE	TRUE	FALSE
cg18129748	chr3	49941408	49941409	MST1R	4486	-101	CGI	TRUE	FALSE	FALSE
cg18255614	chr3	130745685	130745686	NEK11	79858	-7	CGI	TRUE	FALSE	FALSE
cg18256466	chr3	123680504	123680505	CCDC14	64770	-248	CGI-S-Shore	TRUE	FALSE	FALSE
cg18301348	chr3	193855884	193855885	HES1	3280	1952	CGI	FALSE	TRUE	FALSE
cg18311854	chr3	191019557	191019558	CCDC50	152137	-27315	Non-CGI	FALSE	TRUE	FALSE
cg18340446	chr3	53916291	53916292	ACTR8	93973	-61	CGI	TRUE	FALSE	FALSE
cg18403480	chr3	38537719	38537720	EXOG	9941	-42	CGI	TRUE	FALSE	FALSE
cg18683143	chr3	184429764	184429765	MAGEF1	64110	70	CGI	TRUE	FALSE	FALSE
cg18768347	chr3	5024849	5024850	BHLHE40-AS1	100507582	-3202	CGI	FALSE	TRUE	FALSE
cg18990407	chr3	184297380	184297381	EPHB3	2049	17792	CGI	FALSE	TRUE	FALSE
cg19049316	chr3	61237063	61237064	FHIT	2272	68	CGI	TRUE	FALSE	FALSE
cg19111042	chr3	15469386	15469387	EAF1	85403	321	CGI	TRUE	FALSE	FALSE
cg19112357	chr3	13834712	13834713	WNT7A	7476	86904	CGI-N-Shore	FALSE	FALSE	TRUE
cg19260500	chr3	133969278	133969279	RYK	6259	306	CGI	FALSE	TRUE	FALSE
cg19447156	chr3	50541195	50541196	CACNA2D2	9254	-302	CGI	TRUE	FALSE	FALSE
cg19526908	chr3	49058333	49058334	DALRD3	55152	132	CGI	TRUE	TRUE	FALSE
cg19628771	chr3	9027576	9027577	RAD18	56852	-22416	CGI-S-Shore	FALSE	TRUE	FALSE
cg19823793	chr3	20227663	20227664	SGOL1	151648	59	CGI	TRUE	FALSE	FALSE
cg19831962	chr3	46719834	46719835	ALS2CL	259173	15358	Non-CGI	TRUE	TRUE	FALSE
cg19836345	chr3	49466585	49466586	NICN1	84276	170	CGI	TRUE	FALSE	FALSE
cg19862838	chr3	101396008	101396009	ZBTB11	27107	-19	CGI	TRUE	FALSE	FALSE
cg19930721	chr3	47554419	47554420	ELP6	54859	778	CGI	FALSE	TRUE	FALSE
cg19952228	chr3	122102923	122102924	FAM162A	26355	-98	CGI	TRUE	FALSE	FALSE
cg20080006	chr3	149376040	149376041	WWTR1-AS1	100128025	42	CGI	TRUE	TRUE	FALSE
cg20089095	chr3	185303988	185303989	SENP2	59343	3480	CGI	TRUE	TRUE	FALSE
cg20141549	chr3	51534298	51534299	VPRBP	9730	-279	CGI	TRUE	FALSE	FALSE
cg20168479	chr3	32443031	32443032	CMTM7	112616	9867	CGI	FALSE	TRUE	FALSE
cg20296001	chr3	180320159	180320160	TTC14	151613	240	CGI	TRUE	FALSE	FALSE
cg20367852	chr3	187457520	187457521	BCL6	604	5991	CGI	FALSE	TRUE	FALSE
cg20391883	chr3	71834706	71834707	PROK2	60675	-348	CGI	TRUE	FALSE	FALSE
cg20396559	chr3	65699637	65699638	MAGI1	9223	324870	Non-CGI	FALSE	TRUE	FALSE
cg20693607	chr3	184319566	184319567	EPHB3	2049	39978	CGI	FALSE	FALSE	TRUE
cg20786557	chr3	167452770	167452771	PDCD10	11235	-118	CGI	TRUE	FALSE	FALSE
cg20835807	chr3	197026013	197026014	DLG1	1739	128	CGI	TRUE	TRUE	FALSE
cg20885179	chr3	38035831	38035832	VILL	50853	6300	CGI	TRUE	TRUE	FALSE
cg20970111	chr3	195934604	195934605	ZDHHC19	131540	3694	CGI	FALSE	TRUE	FALSE
cg20981856	chr3	17787350	17787351	TBC1D5	9779	-3109	CGI-S-Shelf	FALSE	FALSE	TRUE
cg21104449	chr3	196485278	196485279	PAK2	5062	18549	CGI-N-Shelf	FALSE	TRUE	FALSE
cg21140054	chr3	42632404	42632405	SS18L2	51188	105	CGI	TRUE	TRUE	FALSE
cg21222826	chr3	69062762	69062763	EOGT	285203	10	CGI	TRUE	FALSE	FALSE
cg21303011	chr3	24537177	24537178	THRB	7068	-723	CGI	TRUE	FALSE	FALSE
cg21473142	chr3	27762095	27762096	EOMES	8320	2109	CGI-S-Shore	FALSE	TRUE	FALSE
cg21612339	chr3	49761620	49761621	GMPPB	29925	-235	CGI	TRUE	FALSE	FALSE
cg21655307	chr3	141030761	141030762	ZBTB38	253461	-12292	CGI	FALSE	FALSE	TRUE
cg21789849	chr3	107809536	107809537	CD47	961	397	CGI	FALSE	TRUE	FALSE
cg21792155	chr3	46940347	46940348	PTH1R	5745	21110	CGI	FALSE	TRUE	FALSE
cg21838625	chr3	10378056	10378057	SEC13	6396	-15197	CGI	TRUE	TRUE	FALSE
cg21908638	chr3	101497982	101497983	NXPE3	91775	-45	CGI	TRUE	FALSE	FALSE
cg22090419	chr3	53844172	53844173	CHDH	55349	36246	CGI	FALSE	TRUE	FALSE
cg22156255	chr3	149939241	149939242	TSC22D2	9819	-187545	CGI	FALSE	FALSE	TRUE
cg22612116	chr3	134204778	134204779	ANAPC13	25847	85	CGI	TRUE	TRUE	FALSE
cg22621867	chr3	51990301	51990302	GPR62	118442	970	CGI	TRUE	FALSE	FALSE
cg22841359	chr3	127842733	127842734	EEFSEC	60678	-29578	CGI	TRUE	TRUE	FALSE
cg22887911	chr3	44903730	44903731	TMEM42	131616	321	CGI	FALSE	TRUE	FALSE
cg22960945	chr3	9957459	9957460	IL17RC	84818	-1297	CGI	TRUE	TRUE	FALSE
cg23192683	chr3	194208907	194208908	FLJ34208	401106	1037	CGI-S-Shore	FALSE	TRUE	FALSE
cg23208152	chr3	50383134	50383135	ZMYND10	51364	20	CGI	TRUE	FALSE	FALSE
cg23363832	chr3	139258939	139258940	RBP1	5947	-267	CGI-S-Shore	TRUE	FALSE	FALSE
cg23479905	chr3	49059487	49059488	DALRD3	55152	-1019	CGI	TRUE	TRUE	FALSE
cg23492215	chr3	107941502	107941503	IFT57	55081	-84	CGI-S-Shore	TRUE	FALSE	FALSE
cg23506350	chr3	125094322	125094323	ZNF148	7707	-123	CGI	TRUE	FALSE	FALSE
cg23610018	chr3	11761460	11761461	VGLL4	9686	758	CGI	FALSE	TRUE	FALSE
cg23651146	chr3	57261829	57261830	APPL1	26060	63	CGI	TRUE	FALSE	FALSE
cg23719848	chr3	110790763	110790764	PVRL3	25945	156	CGI	TRUE	FALSE	FALSE
cg23816928	chr3	150264597	150264598	EIF2A	83939	22	CGI	TRUE	TRUE	FALSE
cg23955684	chr3	16555288	16555289	RFTN1	23180	-65	CGI	TRUE	FALSE	FALSE
cg24023588	chr3	128997632	128997633	C3orf37	56941	-50	CGI	TRUE	FALSE	FALSE
cg24050613	chr3	186648279	186648280	ST6GAL1	6480	-34	CGI	TRUE	FALSE	FALSE
cg24122247	chr3	10068142	10068143	FANCD2	2177	28	CGI	TRUE	FALSE	FALSE
cg24159247	chr3	4575483	4575484	ITPR1	3708	40450	Non-CGI	FALSE	TRUE	FALSE
cg24625136	chr3	138658554	138658555	FOXL2	668	7426	CGI	FALSE	TRUE	FALSE
cg24695608	chr3	185986721	185986722	DGKG	1608	93300	CGI	FALSE	TRUE	FALSE
cg24822001	chr3	43732329	43732330	ABHD5	51099	-44	CGI	TRUE	FALSE	FALSE
cg24923700	chr3	142315220	142315221	PLS1	5357	-7	CGI	TRUE	FALSE	FALSE
cg25092247	chr3	15140607	15140608	ZFYVE20	64145	46	CGI	TRUE	FALSE	FALSE
cg25132161	chr3	179370779	179370780	USP13	8975	-152	CGI	TRUE	FALSE	FALSE
cg25151919	chr3	44754333	44754334	ZNF502	91392	197	CGI	FALSE	TRUE	FALSE
cg25234159	chr3	184870893	184870894	C3orf70	285382	-90	CGI	TRUE	FALSE	FALSE
cg25444231	chr3	193852935	193852936	HES1	3280	-994	CGI	TRUE	FALSE	FALSE
cg25466588	chr3	23958904	23958905	RPL15	6138	608	CGI	TRUE	TRUE	FALSE
cg25574812	chr3	44770954	44770955	ZNF501	115560	-168	CGI-N-Shore	TRUE	FALSE	FALSE
cg25604819	chr3	82857026	82857027	GBE1	2632	-1046075	CGI-N-Shore	FALSE	FALSE	TRUE
cg25628243	chr3	196295415	196295416	WDR53	348793	-1	CGI	TRUE	FALSE	FALSE
cg25701418	chr3	66024556	66024557	MAGI1	9223	-46	CGI	TRUE	FALSE	FALSE
cg25750609	chr3	101280791	101280792	TRMT10C	54931	78	CGI	TRUE	FALSE	FALSE
cg25809637	chr3	93698966	93698967	ARL13B	200894	-15	CGI	TRUE	FALSE	FALSE
cg25976563	chr3	179169592	179169593	GNB4	59345	-220	CGI	TRUE	FALSE	FALSE
cg26094646	chr3	15247472	15247473	COL6A4P1	344875	-5	CGI-N-Shore	TRUE	FALSE	FALSE
cg26143045	chr3	132757610	132757611	TMEM108	66000	438	CGI	FALSE	TRUE	FALSE
cg26301689	chr3	142681704	142681705	PAQR9	344838	472	CGI	TRUE	FALSE	FALSE
cg26309929	chr3	24083947	24083948	LINC00691	152024	60789	Non-CGI	FALSE	FALSE	TRUE
cg26384201	chr3	50336345	50336346	NAT6	24142	552	CGI-N-Shore	TRUE	TRUE	FALSE
cg26389914	chr3	4805500	4805501	EGOT	100126791	-12225	CGI	FALSE	TRUE	FALSE
cg26398261	chr3	19188463	19188464	KCNH8	131096	-1552	CGI	TRUE	FALSE	FALSE
cg26403284	chr3	122512611	122512612	HSPBAP1	79663	53	CGI	TRUE	FALSE	FALSE
cg26404568	chr3	12882848	12882849	RPL32	6161	231	CGI	TRUE	TRUE	FALSE
cg26433722	chr3	58163614	58163615	DNASE1L3	1776	37237	CGI	FALSE	FALSE	TRUE
cg26464889	chr3	13692169	13692170	LINC00620	285375	-50	CGI	TRUE	FALSE	FALSE
cg26545834	chr3	185303959	185303960	SENP2	59343	3451	CGI	TRUE	TRUE	FALSE
cg26714086	chr3	196392615	196392616	LRRC33	375387	25958	Non-CGI	FALSE	FALSE	TRUE
cg26792116	chr3	168865089	168865090	MECOM	2122	516472	CGI	TRUE	TRUE	FALSE
cg26857078	chr3	129034995	129034996	H1FX-AS1	339942	-117	CGI	TRUE	FALSE	FALSE
cg27270388	chr3	183948255	183948256	VWA5B2	90113	-60	CGI	TRUE	FALSE	FALSE
cg27271513	chr3	38206730	38206731	OXSR1	9943	-294	CGI	TRUE	FALSE	FALSE
cg27297753	chr3	10052900	10052901	LOC401052	401052	-120	CGI	TRUE	TRUE	FALSE
cg27323154	chr3	150421424	150421425	FAM194A	131831	316	CGI	TRUE	TRUE	FALSE
cg27504195	chr3	113342400	113342401	MIR4446	100616476	28676	CGI-N-Shore	FALSE	TRUE	FALSE
cg27505273	chr3	137483543	137483544	SOX14	8403	408	CGI	TRUE	FALSE	FALSE
cg27532099	chr3	120461514	120461515	GTF2E1	2960	-42	CGI	TRUE	FALSE	FALSE
cg27575106	chr3	119396361	119396362	COX17	10063	-117	CGI	TRUE	FALSE	FALSE
cg27614445	chr3	179041226	179041227	ZNF639	51193	406	CGI	TRUE	TRUE	FALSE
cg00224911	chr4	74486142	74486143	RASSF6	166824	196	Non-CGI	TRUE	TRUE	FALSE
cg00322942	chr4	84377076	84377077	MRPS18C	51023	-40	CGI	TRUE	FALSE	FALSE
cg00604539	chr4	119606524	119606525	METTL14	57721	-48	CGI-N-Shore	TRUE	FALSE	FALSE
cg00646883	chr4	73935602	73935603	COX18	285521	-129	CGI	TRUE	FALSE	FALSE
cg00741675	chr4	967327	967328	DGKQ	1609	15	CGI	TRUE	FALSE	FALSE
cg00809888	chr4	76862425	76862426	NAAA	27163	-258	CGI	TRUE	FALSE	FALSE
cg00810208	chr4	997012	997013	FGFRL1	53834	-7926	CGI	FALSE	TRUE	FALSE
cg01023714	chr4	10084725	10084726	MIR3138	100423011	-4408	Non-CGI	TRUE	TRUE	FALSE
cg01122304	chr4	2845576	2845577	ADD1	118	-6	CGI	TRUE	FALSE	FALSE
cg01156816	chr4	132984152	132984153	PCDH10	57575	-1086316	CGI	FALSE	FALSE	TRUE
cg01219382	chr4	184328462	184328463	CDKN2AIP	55602	-37325	CGI	FALSE	FALSE	TRUE
cg01243968	chr4	87515433	87515434	PTPN13	5783	-33	CGI	TRUE	FALSE	FALSE
cg01250155	chr4	1661123	1661124	FAM53A	152877	24863	CGI	FALSE	TRUE	FALSE
cg01283834	chr4	141488964	141488965	UCP1	7350	993	CGI-N-Shore	FALSE	TRUE	FALSE
cg01377200	chr4	184938316	184938317	STOX2	56977	111806	CGI	FALSE	TRUE	FALSE
cg01398529	chr4	26322459	26322460	RBPJ	3516	1126	CGI	TRUE	TRUE	FALSE
cg01464969	chr4	1768943	1768944	FGFR3	2261	-26094	CGI	FALSE	FALSE	TRUE
cg01856849	chr4	169931464	169931465	CBR4	84869	2	CGI	TRUE	FALSE	FALSE
cg01942962	chr4	158143439	158143440	GRIA2	2891	2143	CGI	FALSE	TRUE	FALSE
cg02005549	chr4	106629965	106629966	GSTCD	79807	23	CGI	TRUE	FALSE	FALSE
cg02131049	chr4	77227621	77227622	STBD1	8987	441	CGI	TRUE	TRUE	FALSE
cg02187816	chr4	140005074	140005075	ELF2	1998	55575	CGI	FALSE	TRUE	FALSE
cg02464357	chr4	89444989	89444990	PIGY	84992	-33	CGI	TRUE	FALSE	FALSE
cg02528979	chr4	83812705	83812706	THAP9	79725	-9130	CGI	TRUE	TRUE	FALSE
cg02567719	chr4	83350534	83350535	HNRPDL	9987	842	CGI	TRUE	FALSE	FALSE
cg02929209	chr4	53588595	53588596	SNORA26	677810	9178	CGI	FALSE	FALSE	TRUE
cg02951274	chr4	3417431	3417432	HGFAC	3083	-26293	CGI	FALSE	TRUE	FALSE
cg02969873	chr4	1330999	1331000	UVSSA	57654	-10103	CGI	FALSE	TRUE	FALSE
cg03162143	chr4	762159	762160	LOC100129917	100129917	13475	CGI	TRUE	TRUE	FALSE
cg03191889	chr4	75858262	75858263	PARM1	25849	-21	CGI	TRUE	FALSE	FALSE
cg03372076	chr4	171964403	171964404	LOC100506122	100506122	2649	CGI	FALSE	TRUE	FALSE
cg03402994	chr4	984131	984132	SLC26A1	10861	3091	CGI	FALSE	TRUE	FALSE
cg03447013	chr4	31577307	31577308	PCDH7	5099	855276	Non-CGI	FALSE	FALSE	TRUE
cg03461399	chr4	71858891	71858892	DCK	1633	-372	CGI-N-Shore	TRUE	FALSE	FALSE
cg03482087	chr4	128886832	128886833	MFSD8	256471	305	CGI	TRUE	TRUE	FALSE
cg03522447	chr4	88929611	88929612	PKD2	5311	811	CGI	FALSE	TRUE	FALSE
cg03768017	chr4	185747375	185747376	ACSL1	2180	-159	CGI	TRUE	FALSE	FALSE
cg03855256	chr4	142142274	142142275	ZNF330	27309	224	CGI	FALSE	TRUE	FALSE
cg03905758	chr4	174451468	174451469	HAND2	9464	-89	CGI	TRUE	FALSE	FALSE
cg04066316	chr4	189433040	189433041	LOC401164	401164	111149	Non-CGI	FALSE	TRUE	FALSE
cg04178057	chr4	108910868	108910869	HADH	3033	0	CGI	TRUE	FALSE	FALSE
cg04223207	chr4	48018662	48018663	CNGA1	1259	-51	CGI	TRUE	FALSE	FALSE
cg04477404	chr4	161403211	161403212	RAPGEF2	9693	1214212	CGI	FALSE	FALSE	TRUE
cg04686953	chr4	1107512	1107513	RNF212	285498	-159	CGI	TRUE	FALSE	FALSE
cg04737207	chr4	140222858	140222859	NAA15	80155	181	CGI	TRUE	TRUE	FALSE
cg04765098	chr4	184644154	184644155	TRAPPC11	60684	63733	CGI	FALSE	FALSE	TRUE
cg04796973	chr4	25314218	25314219	ZCCHC4	29063	-176	CGI-N-Shore	TRUE	FALSE	FALSE
cg04899896	chr4	79860379	79860380	PAQR3	152559	201	CGI	TRUE	FALSE	FALSE
cg05181186	chr4	85504391	85504392	CDS1	1040	333	CGI	TRUE	FALSE	FALSE
cg05210937	chr4	185655043	185655044	MLF1IP	79682	241	CGI	FALSE	TRUE	FALSE
cg05264454	chr4	120549840	120549841	PDE5A	8654	139	CGI	TRUE	FALSE	FALSE
cg05275153	chr4	3431837	3431838	HGFAC	3083	-11887	CGI-N-Shore	FALSE	TRUE	FALSE
cg05300158	chr4	140477727	140477728	SETD7	80854	-149	CGI	TRUE	FALSE	FALSE
cg05682719	chr4	119809971	119809972	SYNPO2	171024	-23	CGI	TRUE	FALSE	FALSE
cg05719252	chr4	75023851	75023852	MTHFD2L	441024	43954	CGI	TRUE	TRUE	FALSE
cg05795596	chr4	154170783	154170784	ANXA2P1	303	59178	CGI	FALSE	TRUE	FALSE
cg05821186	chr4	1198353	1198354	LOC100130872	100130872	4395	CGI-S-Shelf	FALSE	TRUE	FALSE
cg05880302	chr4	188426278	188426279	LOC339975	339975	487	CGI-N-Shore	FALSE	TRUE	FALSE
cg05907477	chr4	182080306	182080307	LINC00290	728081	-3	Non-CGI	TRUE	FALSE	FALSE
cg06041156	chr4	110651191	110651192	PLA2G12A	81579	49	CGI	TRUE	FALSE	FALSE
cg06274396	chr4	185941625	185941626	HELT	391723	1629	CGI	FALSE	TRUE	FALSE
cg06464441	chr4	130014500	130014501	SCLT1	132320	262	CGI	TRUE	FALSE	FALSE
cg06532184	chr4	16227813	16227814	TAPT1	202018	346	CGI	TRUE	TRUE	FALSE
cg06538183	chr4	2464842	2464843	RNF4	6047	-5951	CGI	FALSE	FALSE	TRUE
cg06545139	chr4	926475	926476	TMEM175	84286	212	CGI	TRUE	TRUE	FALSE
cg06651522	chr4	7862646	7862647	AFAP1	60312	79005	Non-CGI	FALSE	TRUE	FALSE
cg06789048	chr4	3416881	3416882	HGFAC	3083	-26843	CGI	FALSE	TRUE	FALSE
cg06798642	chr4	48272082	48272083	TEC	7006	-267	CGI	TRUE	FALSE	FALSE
cg06839424	chr4	1007283	1007284	FGFRL1	53834	2342	CGI	FALSE	TRUE	FALSE
cg06848047	chr4	90757629	90757630	LOC644248	644248	76	CGI	TRUE	TRUE	FALSE
cg06965122	chr4	174089515	174089516	GALNT7	51809	-387	CGI-N-Shore	TRUE	TRUE	FALSE
cg07082158	chr4	114681880	114681881	CAMK2D	817	1201	CGI-S-Shore	FALSE	TRUE	FALSE
cg07097374	chr4	100573536	100573537	MTTP	4547	88295	CGI	TRUE	FALSE	FALSE
cg07110949	chr4	1309878	1309879	MAEA	10296	26205	CGI	FALSE	TRUE	FALSE
cg07125251	chr4	185089712	185089713	ENPP6	133121	49400	CGI	FALSE	TRUE	FALSE
cg07409418	chr4	174429649	174429650	HAND2	9464	21727	CGI	FALSE	FALSE	TRUE
cg07474108	chr4	79697329	79697330	BMP2K	55589	-201	CGI	TRUE	FALSE	FALSE
cg07595404	chr4	130014885	130014886	C4orf33	132321	55	CGI	TRUE	FALSE	FALSE
cg07701716	chr4	170533879	170533880	NEK1	4750	-100	CGI	TRUE	FALSE	FALSE
cg07725967	chr4	7663352	7663353	AFAP1-AS1	84740	-92463	CGI-N-Shelf	FALSE	TRUE	FALSE
cg07767534	chr4	84031145	84031146	PLAC8	51316	4764	CGI	TRUE	TRUE	FALSE
cg07828340	chr4	882639	882640	GAK	2580	43533	CGI	FALSE	TRUE	FALSE
cg08071405	chr4	3446405	3446406	HGFAC	3083	2678	CGI	FALSE	TRUE	FALSE
cg08136276	chr4	83351514	83351515	HNRPDL	9987	-135	CGI	TRUE	FALSE	FALSE
cg08292519	chr4	117374476	117374477	MIR1973	100302290	153594	Non-CGI	FALSE	FALSE	TRUE
cg08422863	chr4	89300650	89300651	HERC6	55008	758	CGI	FALSE	TRUE	FALSE
cg08644841	chr4	187065955	187065956	FAM149A	25854	739	CGI	TRUE	TRUE	FALSE
cg08744727	chr4	206112	206113	ZNF876P	642280	-275	CGI-N-Shore	TRUE	FALSE	FALSE
cg09020341	chr4	71704808	71704809	GRSF1	2926	817	CGI	FALSE	TRUE	FALSE
cg09038155	chr4	139937227	139937228	CCRN4L	25819	283	CGI	TRUE	FALSE	FALSE
cg09117206	chr4	109684077	109684078	AGXT2L1	64850	156	CGI	TRUE	FALSE	FALSE
cg09237562	chr4	137733853	137733854	PCDH18	54510	719793	CGI	FALSE	FALSE	TRUE
cg09278283	chr4	36376970	36376971	DTHD1	401124	93725	CGI	FALSE	FALSE	TRUE
cg09499698	chr4	68411154	68411155	CENPC1	1060	100	CGI	TRUE	FALSE	FALSE
cg09511237	chr4	140477492	140477493	SETD7	80854	83	CGI	TRUE	FALSE	FALSE
cg09534159	chr4	10458918	10458919	ZNF518B	85460	112	CGI	FALSE	TRUE	FALSE
cg09983370	chr4	42658444	42658445	ATP8A1	10396	676	CGI	FALSE	TRUE	FALSE
cg10029186	chr4	174430771	174430772	HAND2	9464	20605	CGI	FALSE	FALSE	TRUE
cg10202508	chr4	166034152	166034153	TMEM192	201931	-127	CGI	TRUE	FALSE	FALSE
cg10308775	chr4	178478768	178478769	AGA	175	-115110	Non-CGI	FALSE	TRUE	FALSE
cg10325536	chr4	3512392	3512393	LRPAP1	4043	21830	CGI-S-Shore	FALSE	TRUE	FALSE
cg10519766	chr4	4291809	4291810	LYAR	55646	85	CGI	TRUE	FALSE	FALSE
cg10737891	chr4	85504029	85504030	CDS1	1040	-26	CGI	TRUE	FALSE	FALSE
cg10752575	chr4	1215743	1215744	LOC100130872	100130872	-12992	CGI	FALSE	TRUE	FALSE
cg10756475	chr4	1757242	1757243	TACC3	10460	34024	Non-CGI	FALSE	FALSE	TRUE
cg10828676	chr4	147443721	147443722	SLC10A7	84068	-597	CGI	TRUE	FALSE	FALSE
cg10871779	chr4	113437909	113437910	NEUROG2	63973	-580	CGI	TRUE	FALSE	FALSE
cg10879955	chr4	48271942	48271943	TEC	7006	-127	CGI	TRUE	FALSE	FALSE
cg10922881	chr4	7438657	7438658	PSAPL1	768239	-1956	CGI-S-Shelf	TRUE	TRUE	FALSE
cg10937802	chr4	26177098	26177099	RBPJ	3516	-144232	Non-CGI	FALSE	FALSE	TRUE
cg11107149	chr4	960835	960836	DGKQ	1609	6507	CGI	FALSE	TRUE	FALSE
cg11186122	chr4	174255494	174255495	HMGB2	3148	99	CGI	TRUE	FALSE	FALSE
cg11258164	chr4	44450881	44450882	KCTD8	386617	-56	CGI	TRUE	FALSE	FALSE
cg11392855	chr4	2795155	2795156	SH3BP2	6452	404	CGI	FALSE	TRUE	FALSE
cg11497952	chr4	185940969	185940970	HELT	391723	973	CGI	FALSE	TRUE	FALSE
cg11532267	chr4	38869271	38869272	FAM114A1	92689	-81	CGI	TRUE	FALSE	FALSE
cg11553618	chr4	185905046	185905047	HELT	391723	-34947	CGI-N-Shore	FALSE	FALSE	TRUE
cg11856821	chr4	187540609	187540610	MTNR1A	4543	-64071	CGI	FALSE	TRUE	FALSE
cg11918740	chr4	17616649	17616650	MED28	80306	375	CGI	FALSE	TRUE	FALSE
cg12087304	chr4	122873018	122873019	TRPC3	7222	-108	CGI	TRUE	FALSE	FALSE
cg12370284	chr4	88312521	88312522	HSD17B11	51170	-65	CGI	TRUE	FALSE	FALSE
cg12524748	chr4	1713366	1713367	SLBP	7884	703	CGI	FALSE	TRUE	FALSE
cg12593336	chr4	2243942	2243943	POLN	353497	-81	CGI	TRUE	FALSE	FALSE
cg12746059	chr4	134070389	134070390	PCDH10	57575	-79	CGI	TRUE	FALSE	FALSE
cg12836011	chr4	166795260	166795261	TLL1	7092	849	CGI-S-Shore	FALSE	TRUE	FALSE
cg12959887	chr4	4543699	4543700	STX18	53407	74	CGI	TRUE	FALSE	FALSE
cg13078134	chr4	165109478	165109479	ANP32C	23520	9383	CGI	FALSE	TRUE	FALSE
cg13294780	chr4	140005756	140005757	ELF2	1998	54893	CGI	TRUE	TRUE	FALSE
cg13348155	chr4	124426923	124426924	SPRY1	10252	108966	CGI	FALSE	FALSE	TRUE
cg13356354	chr4	6675676	6675677	LOC93622	93622	-143	CGI	TRUE	FALSE	FALSE
cg13677120	chr4	52709175	52709176	DCUN1D4	23142	-99	CGI	TRUE	FALSE	FALSE
cg13773914	chr4	122872367	122872368	TRPC3	7222	540	CGI	FALSE	TRUE	FALSE
cg13775316	chr4	109093218	109093219	LEF1	51176	-3105	CGI	TRUE	TRUE	FALSE
cg13784466	chr4	187527305	187527306	MTNR1A	4543	-50767	CGI-S-Shelf	FALSE	TRUE	FALSE
cg13914083	chr4	158141526	158141527	GRIA2	2891	230	CGI	TRUE	TRUE	FALSE
cg13939352	chr4	57253710	57253711	AASDH	132949	-71	CGI	TRUE	FALSE	FALSE
cg13952745	chr4	93225466	93225467	GRID2	2895	-82	CGI	TRUE	FALSE	FALSE
cg14029686	chr4	2765767	2765768	TNIP2	79155	-7663	CGI	FALSE	FALSE	TRUE
cg14177620	chr4	56719854	56719855	EXOC1	55763	37	CGI	TRUE	FALSE	FALSE
cg14243299	chr4	76439964	76439965	THAP6	152815	309	CGI	TRUE	TRUE	FALSE
cg14271438	chr4	119757241	119757242	SEC24D	9871	2584	CGI	TRUE	TRUE	FALSE
cg14308286	chr4	22780491	22780492	GBA3	57733	85942	CGI	FALSE	TRUE	FALSE
cg14502728	chr4	78978537	78978538	FRAS1	80144	-185	CGI	TRUE	FALSE	FALSE
cg14525473	chr4	1161319	1161320	LOC100130872	100130872	41429	CGI	FALSE	TRUE	FALSE
cg14611892	chr4	113067071	113067072	C4orf32	132720	517	CGI	FALSE	TRUE	FALSE
cg14686113	chr4	54965829	54965830	GSX2	170825	-417	CGI-N-Shore	TRUE	TRUE	FALSE
cg14718741	chr4	189140097	189140098	TRIML1	339976	79498	CGI	FALSE	FALSE	TRUE
cg14746841	chr4	7604322	7604323	MIR4274	100422826	142566	CGI	FALSE	TRUE	FALSE
cg14839371	chr4	2831238	2831239	ADD1	118	-14344	CGI-N-Shore	FALSE	TRUE	FALSE
cg15436123	chr4	3390332	3390333	HGFAC	3083	-53392	CGI-N-Shore	FALSE	TRUE	FALSE
cg15463803	chr4	113436765	113436766	NEUROG2	63973	561	CGI	TRUE	TRUE	FALSE
cg15614628	chr4	74124464	74124465	ANKRD17	26057	36	CGI	TRUE	FALSE	FALSE
cg15846316	chr4	57371719	57371720	ARL9	132946	343	CGI	FALSE	TRUE	FALSE
cg15957017	chr4	71571214	71571215	RUFY3	22902	559	CGI	FALSE	TRUE	FALSE
cg16145167	chr4	38825411	38825412	TLR1	7096	-18998	CGI-N-Shore	FALSE	TRUE	FALSE
cg16152424	chr4	78978848	78978849	FRAS1	80144	123	CGI	TRUE	FALSE	FALSE
cg16170181	chr4	144258448	144258449	GAB1	2549	464	CGI	FALSE	TRUE	FALSE
cg16371080	chr4	3309069	3309070	RGS12	6002	14313	CGI	FALSE	TRUE	FALSE
cg16426339	chr4	85419530	85419531	NKX6-1	4825	-142	CGI	TRUE	FALSE	FALSE
cg16646539	chr4	88141915	88141916	KLHL8	57563	-240	CGI	TRUE	FALSE	FALSE
cg16785698	chr4	186456103	186456104	PDLIM3	27295	607	CGI	FALSE	TRUE	FALSE
cg16814143	chr4	154216637	154216638	ANXA2P1	303	13324	CGI	FALSE	TRUE	FALSE
cg16976370	chr4	46995821	46995822	GABRA4	2557	601	CGI	TRUE	FALSE	FALSE
cg17061192	chr4	185926620	185926621	HELT	391723	-13373	CGI	FALSE	FALSE	TRUE
cg17118812	chr4	185888982	185888983	HELT	391723	-51011	CGI	FALSE	FALSE	TRUE
cg17170743	chr4	719037	719038	PCGF3	10336	19463	CGI-N-Shore	FALSE	TRUE	FALSE
cg17226811	chr4	146654277	146654278	C4orf51	646603	52920	CGI	FALSE	FALSE	TRUE
cg17290159	chr4	57843785	57843786	NOA1	84273	39	CGI	TRUE	FALSE	FALSE
cg17397631	chr4	779880	779881	LOC100129917	100129917	-4243	CGI	FALSE	TRUE	FALSE
cg17397955	chr4	56915347	56915348	CEP135	9662	100309	CGI	FALSE	FALSE	TRUE
cg17483361	chr4	54243829	54243830	PDGFRA	5156	8	CGI	TRUE	FALSE	FALSE
cg17484629	chr4	111119220	111119221	ELOVL6	79071	598	CGI	FALSE	TRUE	FALSE
cg17485021	chr4	13530094	13530095	LOC285547	285547	2945	CGI	FALSE	TRUE	FALSE
cg17563034	chr4	5021268	5021269	CYTL1	54360	-70	CGI-S-Shore	TRUE	FALSE	FALSE
cg17666096	chr4	141294787	141294788	LOC100129858	100129858	-240	CGI	TRUE	TRUE	FALSE
cg17765713	chr4	128801754	128801755	PLK4	10733	-260	CGI-N-Shore	TRUE	FALSE	FALSE
cg17839008	chr4	17783042	17783043	FAM184B	27146	91	CGI	TRUE	FALSE	FALSE
cg18078087	chr4	15005463	15005464	CPEB2	132864	1164	CGI	TRUE	FALSE	FALSE
cg18089134	chr4	130014711	130014712	SCLT1	132320	51	CGI	TRUE	FALSE	FALSE
cg18145393	chr4	520203	520204	ZNF721	170960	-26760	CGI	FALSE	TRUE	FALSE
cg18330675	chr4	180980172	180980173	LINC00290	728081	1100128	CGI	FALSE	FALSE	TRUE
cg18589016	chr4	85419557	85419558	NKX6-1	4825	-169	CGI	TRUE	FALSE	FALSE
cg18608389	chr4	52917561	52917562	SPATA18	132671	-30	CGI	TRUE	FALSE	FALSE
cg18631798	chr4	8396163	8396164	TRMT44	152992	-44439	CGI	FALSE	TRUE	FALSE
cg18675616	chr4	1962842	1962843	SCARNA22	677770	-13519	Non-CGI	FALSE	TRUE	FALSE
cg18705900	chr4	170192536	170192537	SH3RF1	57630	-286	CGI	TRUE	FALSE	FALSE
cg18795809	chr4	10458531	10458532	ZNF518B	85460	499	CGI	FALSE	TRUE	FALSE
cg19034890	chr4	8373516	8373517	TRMT44	152992	-67086	CGI	FALSE	TRUE	FALSE
cg19090637	chr4	111119052	111119053	ELOVL6	79071	766	CGI	FALSE	TRUE	FALSE
cg19671926	chr4	122722719	122722720	EXOSC9	5393	246	CGI	TRUE	TRUE	FALSE
cg19931305	chr4	147443703	147443704	SLC10A7	84068	-579	CGI	TRUE	FALSE	FALSE
cg20000718	chr4	41869433	41869434	TMEM33	55161	-67702	CGI	FALSE	FALSE	TRUE
cg20277282	chr4	8230053	8230054	SH3TC1	54436	28992	CGI	TRUE	TRUE	FALSE
cg20445582	chr4	55083843	55083844	GSX2	170825	117594	CGI	FALSE	TRUE	FALSE
cg20460797	chr4	4387917	4387918	NSG1	27065	38047	CGI	TRUE	TRUE	FALSE
cg20594316	chr4	2389156	2389157	ZFYVE28	57732	31212	CGI-S-Shore	FALSE	TRUE	FALSE
cg20642710	chr4	81951951	81951952	BMP3	651	-166	CGI	TRUE	FALSE	FALSE
cg20732881	chr4	188426506	188426507	LOC339975	339975	259	CGI	TRUE	FALSE	FALSE
cg20774475	chr4	108641752	108641753	PAPSS1	9061	-332	CGI	TRUE	FALSE	FALSE
cg21042627	chr4	183193100	183193101	MIR1305	100302270	102653	Non-CGI	FALSE	TRUE	FALSE
cg21080506	chr4	467474	467475	ABCA11P	79963	522	CGI	FALSE	TRUE	FALSE
cg21225608	chr4	52709259	52709260	DCUN1D4	23142	-15	CGI	TRUE	FALSE	FALSE
cg21330094	chr4	8418132	8418133	TRMT44	152992	-22470	CGI	FALSE	TRUE	FALSE
cg21641573	chr4	1210478	1210479	LOC100130872	100130872	-7727	CGI	FALSE	TRUE	FALSE
cg21746997	chr4	95679381	95679382	BMPR1B	658	252	CGI	FALSE	TRUE	FALSE
cg21832951	chr4	87927955	87927956	AFF1	4299	71800	CGI	TRUE	TRUE	FALSE
cg21923317	chr4	3387678	3387679	HGFAC	3083	-56046	CGI	TRUE	TRUE	FALSE
cg21996239	chr4	186427765	186427766	PDLIM3	27295	28945	Non-CGI	FALSE	TRUE	FALSE
cg22031336	chr4	89079809	89079810	ABCG2	9429	72663	CGI	TRUE	TRUE	FALSE
cg22077701	chr4	144434441	144434442	SMARCA5	8467	-173	CGI	TRUE	FALSE	FALSE
cg22097342	chr4	122618153	122618154	ANXA5	308	-5	CGI	TRUE	FALSE	FALSE
cg22105146	chr4	56262445	56262446	TMEM165	55858	354	CGI	TRUE	FALSE	FALSE
cg22213235	chr4	748946	748947	LOC100129917	100129917	26688	CGI	FALSE	TRUE	FALSE
cg22216491	chr4	110624749	110624750	CASP6	839	-119	CGI	TRUE	FALSE	FALSE
cg22231101	chr4	6052554	6052555	MIR378D1	100616201	-127498	CGI	FALSE	TRUE	FALSE
cg22364126	chr4	171964547	171964548	LOC100506122	100506122	2793	CGI	FALSE	TRUE	FALSE
cg22388850	chr4	48782544	48782545	FRYL	285527	-227	CGI	TRUE	FALSE	FALSE
cg22423979	chr4	124318670	124318671	SPRY1	10252	713	CGI	FALSE	TRUE	FALSE
cg22443651	chr4	40453161	40453162	MIR4802	100616274	50973	Non-CGI	FALSE	TRUE	FALSE
cg22466171	chr4	99850251	99850252	EIF4E	1977	1533	CGI	TRUE	FALSE	FALSE
cg22599148	chr4	1334055	1334056	UVSSA	57654	-7047	CGI	FALSE	FALSE	TRUE
cg22649740	chr4	83351600	83351601	ENOPH1	58478	-124	CGI	TRUE	FALSE	FALSE
cg22798201	chr4	46995637	46995638	GABRA4	2557	785	CGI	TRUE	FALSE	FALSE
cg22833147	chr4	178230858	178230859	NEIL3	55247	-131	CGI-N-Shore	TRUE	FALSE	FALSE
cg22870307	chr4	13300487	13300488	HSP90AB2P	391634	-34548	CGI	FALSE	FALSE	TRUE
cg22930642	chr4	2936657	2936658	NOP14-AS1	317648	30	CGI	TRUE	FALSE	FALSE
cg23186787	chr4	4380004	4380005	NSG1	27065	30134	Non-CGI	FALSE	TRUE	FALSE
cg23210109	chr4	3250690	3250691	MSANTD1	345222	-75	CGI-N-Shore	TRUE	FALSE	FALSE
cg23547048	chr4	698616	698617	PCGF3	10336	-955	CGI	TRUE	FALSE	FALSE
cg23570618	chr4	153898109	153898110	FHDC1	85462	33973	CGI-S-Shore	FALSE	TRUE	FALSE
cg23573638	chr4	184908254	184908255	STOX2	56977	81744	CGI	FALSE	TRUE	FALSE
cg23653712	chr4	52904379	52904380	SGCB	6443	104	CGI	FALSE	TRUE	FALSE
cg23802935	chr4	147366958	147366959	SLC10A7	84068	76163	CGI	FALSE	TRUE	FALSE
cg23847701	chr4	140656096	140656097	MGST2	4258	69173	CGI	FALSE	TRUE	FALSE
cg23884076	chr4	76945449	76945450	CXCL10	3627	-759	Non-CGI	TRUE	TRUE	FALSE
cg23951961	chr4	42154912	42154913	BEND4	389206	-16	CGI	TRUE	FALSE	FALSE
cg23960561	chr4	40058360	40058361	N4BP2	55728	-162	CGI	TRUE	TRUE	FALSE
cg24271100	chr4	122722383	122722384	EXOSC9	5393	-87	CGI	TRUE	FALSE	FALSE
cg24389389	chr4	141075404	141075405	MAML3	55534	-170	CGI	TRUE	FALSE	FALSE
cg24551570	chr4	174255085	174255086	HMGB2	3148	508	CGI	TRUE	TRUE	FALSE
cg24557470	chr4	1341371	1341372	UVSSA	57654	266	CGI	TRUE	FALSE	FALSE
cg24588528	chr4	3027957	3027958	HTT-AS1	100750326	48282	CGI	FALSE	TRUE	FALSE
cg24611427	chr4	140099304	140099305	ELF2	1998	-38652	CGI	FALSE	FALSE	TRUE
cg24654176	chr4	111119358	111119359	ELOVL6	79071	460	CGI	FALSE	TRUE	FALSE
cg24689061	chr4	7483577	7483578	MIR4274	100422826	21821	CGI-N-Shore	FALSE	TRUE	FALSE
cg24693490	chr4	55093612	55093613	GSX2	170825	127363	CGI	TRUE	TRUE	FALSE
cg24703018	chr4	75859815	75859816	PARM1	25849	1529	CGI	FALSE	TRUE	FALSE
cg24789447	chr4	148402574	148402575	EDNRA	1909	504	CGI	FALSE	TRUE	FALSE
cg24820270	chr4	187629336	187629337	FAT1	2195	18512	CGI-S-Shore	FALSE	TRUE	FALSE
cg24917627	chr4	48271835	48271836	TEC	7006	-20	CGI	TRUE	FALSE	FALSE
cg25097308	chr4	8594549	8594550	CPZ	8532	12331	CGI	TRUE	TRUE	FALSE
cg25148771	chr4	2936127	2936128	MFSD10	10227	457	CGI	TRUE	TRUE	FALSE
cg25157709	chr4	15004626	15004627	CPEB2	132864	327	CGI	TRUE	FALSE	FALSE
cg25185173	chr4	154712580	154712581	SFRP2	6423	-2351	CGI	FALSE	FALSE	TRUE
cg25186874	chr4	141540407	141540408	UCP1	7350	-50447	CGI-N-Shelf	FALSE	FALSE	TRUE
cg25261181	chr4	3255128	3255129	MSANTD1	345222	4360	CGI	FALSE	TRUE	FALSE
cg25664381	chr4	4577473	4577474	LOC100507266	100507266	33614	CGI-S-Shore	FALSE	TRUE	FALSE
cg25698236	chr4	187455532	187455533	MTNR1A	4543	21003	CGI	FALSE	TRUE	FALSE
cg25777912	chr4	8233394	8233395	SH3TC1	54436	32333	CGI	FALSE	TRUE	FALSE
cg25894334	chr4	77172836	77172837	FAM47E-STBD1	100631383	-15	CGI	TRUE	TRUE	FALSE
cg25994476	chr4	82393082	82393083	RASGEF1B	153020	-20	CGI-S-Shore	TRUE	FALSE	FALSE
cg26084529	chr4	155664993	155664994	LRAT	9227	-157	CGI	TRUE	TRUE	FALSE
cg26131292	chr4	79861064	79861065	PAQR3	152559	-481	CGI-S-Shore	TRUE	FALSE	FALSE
cg26148714	chr4	52904575	52904576	SGCB	6443	-89	CGI	TRUE	FALSE	FALSE
cg26228943	chr4	47487307	47487308	ATP10D	57205	-101	CGI	TRUE	FALSE	FALSE
cg26455541	chr4	26321238	26321239	RBPJ	3516	-92	CGI	TRUE	FALSE	FALSE
cg26465317	chr4	8398823	8398824	TRMT44	152992	-41779	CGI	FALSE	TRUE	FALSE
cg26757305	chr4	47487301	47487302	ATP10D	57205	-107	CGI	TRUE	FALSE	FALSE
cg26796245	chr4	113970820	113970821	MIR1243	100302188	-57197	Non-CGI	TRUE	TRUE	FALSE
cg26923863	chr4	1221838	1221839	LOC100130872	100130872	-19087	CGI-S-Shore	FALSE	TRUE	FALSE
cg27037990	chr4	184427250	184427251	ING2	3622	1029	CGI	TRUE	TRUE	FALSE
cg27183456	chr4	113333163	113333164	NEUROG2	63973	104163	CGI	TRUE	TRUE	FALSE
cg27297724	chr4	48781911	48781912	FRYL	285527	403	CGI	FALSE	TRUE	FALSE
cg27474733	chr4	3076259	3076260	HTT-AS1	100750326	-17	CGI	TRUE	FALSE	FALSE
cg27492467	chr4	6472445	6472446	PPP2R2C	5522	92880	CGI	FALSE	TRUE	FALSE
cg27556913	chr4	1341059	1341060	UVSSA	57654	-43	CGI	TRUE	FALSE	FALSE
cg00315775	chr5	180258154	180258155	LINC00847	729678	1194	CGI	TRUE	FALSE	FALSE
cg00319661	chr5	2632178	2632179	IRX2	153572	119589	CGI-N-Shore	FALSE	FALSE	TRUE
cg00407623	chr5	80597718	80597719	ZCCHC9	84240	315	CGI	TRUE	TRUE	FALSE
cg00408776	chr5	1337571	1337572	CLPTM1L	81037	7429	CGI-N-Shore	FALSE	TRUE	FALSE
cg00510011	chr5	89854651	89854652	GPR98	84059	33	CGI	TRUE	FALSE	FALSE
cg00582881	chr5	148651359	148651360	AFAP1L1	134265	-40	CGI	TRUE	FALSE	FALSE
cg00616500	chr5	176900001	176900002	DBN1	1627	691	CGI	TRUE	TRUE	FALSE
cg00624617	chr5	153852554	153852555	HAND1	9421	5268	CGI	FALSE	FALSE	TRUE
cg00643311	chr5	1924173	1924174	IRX4	50805	-41292	CGI-S-Shore	FALSE	FALSE	TRUE
cg00971676	chr5	176882057	176882058	PRR7-AS1	340037	-7111	CGI	TRUE	TRUE	FALSE
cg01004278	chr5	132148978	132148979	SOWAHA	134548	-53	CGI	TRUE	FALSE	FALSE
cg01072076	chr5	1930801	1930802	IRX4	50805	-47920	CGI	FALSE	FALSE	TRUE
cg01141339	chr5	72530198	72530199	TMEM174	134288	61174	CGI	FALSE	FALSE	TRUE
cg01184139	chr5	180649358	180649359	MIR4638	100616342	273	CGI	TRUE	FALSE	FALSE
cg01227078	chr5	110074645	110074646	SLC25A46	91137	782	CGI	TRUE	TRUE	FALSE
cg01247845	chr5	68513627	68513628	MRPS36	92259	53	CGI	TRUE	FALSE	FALSE
cg01290068	chr5	162932702	162932703	MAT2B	27430	2470	CGI	TRUE	TRUE	FALSE
cg01541629	chr5	6633111	6633112	NSUN2	54888	360	CGI	TRUE	FALSE	FALSE
cg01590693	chr5	153418326	153418327	FAM114A2	10827	169	CGI	TRUE	TRUE	FALSE
cg01598250	chr5	145722855	145722856	POU4F3	5459	4267	CGI	FALSE	FALSE	TRUE
cg01678714	chr5	179780409	179780410	GFPT2	9945	-93	CGI	TRUE	FALSE	FALSE
cg01803514	chr5	130971035	130971036	RAPGEF6	51735	161719	CGI	TRUE	TRUE	FALSE
cg01941047	chr5	65440763	65440764	SREK1	140890	677	CGI	TRUE	TRUE	FALSE
cg01969115	chr5	663639	663640	TPPP	11076	29869	CGI-S-Shore	FALSE	TRUE	FALSE
cg01993799	chr5	177027141	177027142	B4GALT7	11285	21	CGI	TRUE	FALSE	FALSE
cg02041108	chr5	35946185	35946186	CAPSL	133690	-7303	CGI	FALSE	FALSE	TRUE
cg02103653	chr5	111504758	111504759	SNORA13	654322	7575	Non-CGI	FALSE	TRUE	FALSE
cg02285922	chr5	119799862	119799863	PRR16	51334	-155	CGI-N-Shore	TRUE	FALSE	FALSE
cg02337825	chr5	180480982	180480983	BTNL9	153579	13756	CGI-S-Shore	FALSE	TRUE	FALSE
cg02353814	chr5	135146660	135146661	SLC25A48	153328	-23703	Non-CGI	FALSE	FALSE	TRUE
cg02450613	chr5	37840089	37840090	GDNF	2668	-306	CGI	TRUE	FALSE	FALSE
cg02458910	chr5	79783286	79783287	FAM151B	167555	-512	CGI-N-Shore	TRUE	FALSE	FALSE
cg02520160	chr5	156589436	156589437	FAM71B	153745	3841	Non-CGI	FALSE	TRUE	FALSE
cg02528389	chr5	143550332	143550333	YIPF5	81555	-53	CGI	TRUE	FALSE	FALSE
cg02613713	chr5	149677228	149677229	ARSI	340075	5295	CGI	FALSE	TRUE	FALSE
cg02661258	chr5	14664470	14664471	FAM105B	90268	-311	CGI	TRUE	FALSE	FALSE
cg02680629	chr5	147763595	147763596	FBXO38	81545	48	CGI	TRUE	FALSE	FALSE
cg03534031	chr5	139139105	139139106	PSD2	84249	-36299	CGI	FALSE	FALSE	TRUE
cg03632623	chr5	6846259	6846260	MIR4278	100422999	-18224	Non-CGI	FALSE	FALSE	TRUE
cg03653541	chr5	59064523	59064524	PART1	25859	-719015	CGI	TRUE	TRUE	FALSE
cg03679565	chr5	1882775	1882776	IRX4	50805	103	CGI	TRUE	FALSE	FALSE
cg03958269	chr5	134094426	134094427	DDX46	9879	-33	CGI	TRUE	FALSE	FALSE
cg03975447	chr5	178741374	178741375	ADAMTS2	9509	31055	CGI	FALSE	TRUE	FALSE
cg04059965	chr5	179285867	179285868	C5orf45	51149	-26	CGI	TRUE	FALSE	FALSE
cg04110559	chr5	176873656	176873657	PRR7	80758	-138	CGI	TRUE	TRUE	FALSE
cg04130928	chr5	176449623	176449624	ZNF346	23567	-72	CGI	TRUE	FALSE	FALSE
cg04175399	chr5	80383034	80383035	RNU5E-1	26829	-118426	CGI	FALSE	TRUE	FALSE
cg04196933	chr5	178195556	178195557	ZNF354A	6940	-37852	Non-CGI	FALSE	TRUE	FALSE
cg04696181	chr5	3386790	3386791	LOC285577	285577	149416	CGI	FALSE	FALSE	TRUE
cg04727116	chr5	40679832	40679833	PTGER4	5734	-198	CGI	TRUE	FALSE	FALSE
cg05153820	chr5	149829439	149829440	RPS14	6208	-119	CGI	TRUE	FALSE	FALSE
cg05189291	chr5	157158457	157158458	THG1L	54974	133	CGI	TRUE	FALSE	FALSE
cg05252940	chr5	171881426	171881427	SH3PXD2B	285590	99	CGI	TRUE	FALSE	FALSE
cg05265988	chr5	180688748	180688749	TRIM52	84851	-628	CGI	TRUE	TRUE	FALSE
cg05458841	chr5	65221764	65221765	ERBB2IP	55914	-616	CGI	TRUE	FALSE	FALSE
cg05560435	chr5	172671526	172671527	NKX2-5	1482	-9210	CGI	FALSE	FALSE	TRUE
cg05612977	chr5	172198876	172198877	DUSP1	1843	-672	CGI	TRUE	FALSE	FALSE
cg05859395	chr5	203595	203596	LRRC14B	389257	11968	CGI-N-Shore	FALSE	FALSE	TRUE
cg05867645	chr5	176778779	176778780	LMAN2	10960	104	CGI	TRUE	FALSE	FALSE
cg05922392	chr5	180650178	180650179	TRIM41	90933	-83	CGI	TRUE	TRUE	FALSE
cg05966809	chr5	122180794	122180795	SNX24	28966	-364	CGI	TRUE	FALSE	FALSE
cg05970014	chr5	176863164	176863165	GRK6	2870	9476	CGI	FALSE	TRUE	FALSE
cg05970768	chr5	171682616	171682617	UBTD2	92181	28177	Non-CGI	FALSE	TRUE	FALSE
cg05972654	chr5	1076843	1076844	MIR4635	100616479	-13753	CGI-S-Shore	FALSE	TRUE	FALSE
cg06407470	chr5	75379270	75379271	SV2C	22987	-33	CGI	TRUE	FALSE	FALSE
cg06434480	chr5	74632940	74632941	HMGCR	3156	785	CGI	TRUE	TRUE	FALSE
cg06517759	chr5	32585741	32585742	SUB1	10923	135	CGI	FALSE	TRUE	FALSE
cg06560300	chr5	1278791	1278792	TERT	7015	16369	CGI	FALSE	TRUE	FALSE
cg06610675	chr5	60241428	60241429	NDUFAF2	91942	471	CGI	TRUE	TRUE	FALSE
cg06686995	chr5	179228489	179228490	MIR1229	100302156	-3142	CGI	TRUE	TRUE	FALSE
cg06848689	chr5	180673203	180673204	GNB2L1	10399	-2296	CGI	FALSE	FALSE	TRUE
cg06990967	chr5	2041382	2041383	IRX4	50805	-158501	CGI-S-Shelf	FALSE	FALSE	TRUE
cg06994090	chr5	76011849	76011850	F2R	2149	-17	CGI	TRUE	FALSE	FALSE
cg07180252	chr5	142150015	142150016	ARHGAP26	23092	-275	CGI	TRUE	FALSE	FALSE
cg07210335	chr5	109026907	109026908	MAN2A1	4124	1750	CGI	FALSE	TRUE	FALSE
cg07237214	chr5	42424604	42424605	GHR	2690	726	CGI	TRUE	TRUE	FALSE
cg07298437	chr5	176074358	176074359	TSPAN17	26262	-28	CGI	TRUE	FALSE	FALSE
cg07352245	chr5	179125837	179125838	CANX	821	408	CGI	TRUE	TRUE	FALSE
cg07448606	chr5	140855857	140855858	PCDHGC3	5098	287	CGI	TRUE	TRUE	FALSE
cg07458308	chr5	134827512	134827513	TIFAB	497189	-39422	CGI	FALSE	FALSE	TRUE
cg07626339	chr5	138630455	138630456	SNORA74A	26821	15985	CGI	FALSE	TRUE	FALSE
cg07671805	chr5	74907694	74907695	COL4A3BP	10087	-99887	CGI	FALSE	TRUE	FALSE
cg07741915	chr5	693476	693477	TPPP	11076	32	CGI	TRUE	FALSE	FALSE
cg07763047	chr5	160974837	160974838	GABRB2	2561	291	CGI	TRUE	TRUE	FALSE
cg07764676	chr5	178286881	178286882	ZNF354B	117608	-71	CGI	TRUE	FALSE	FALSE
cg07791464	chr5	174961246	174961247	SFXN1	94081	55731	CGI	FALSE	FALSE	TRUE
cg07816229	chr5	154317915	154317916	GEMIN5	25929	-138	CGI	TRUE	FALSE	FALSE
cg08199544	chr5	140418	140419	PLEKHG4B	153478	44	CGI-N-Shelf	TRUE	FALSE	FALSE
cg08213444	chr5	784871	784872	ZDHHC11	79844	66228	CGI	FALSE	FALSE	TRUE
cg08264699	chr5	110560505	110560506	CAMK4	814	557	CGI	FALSE	TRUE	FALSE
cg08354281	chr5	132113201	132113202	2008-09-01	23176	358	CGI	TRUE	TRUE	FALSE
cg08386084	chr5	57756505	57756506	PLK2	10769	-538	CGI	TRUE	FALSE	FALSE
cg08391321	chr5	112630695	112630696	TSSK1B	83942	140031	CGI	TRUE	TRUE	FALSE
cg08440550	chr5	131132801	131132802	RAPGEF6	51735	-44	CGI	TRUE	FALSE	FALSE
cg08447589	chr5	150603302	150603303	CCDC69	26112	350	CGI	FALSE	TRUE	FALSE
cg08490173	chr5	114880508	114880509	FEM1C	56929	81	CGI	TRUE	FALSE	FALSE
cg08535247	chr5	1643655	1643656	LOC728613	728613	-9534	CGI-S-Shore	FALSE	FALSE	TRUE
cg08540929	chr5	1193937	1193938	SLC6A19	340024	-7771	CGI	FALSE	FALSE	TRUE
cg08674342	chr5	36152125	36152126	SKP2	6502	-18	CGI	TRUE	FALSE	FALSE
cg08691323	chr5	54826683	54826684	RNF138P1	379013	3685	CGI	TRUE	TRUE	FALSE
cg08707475	chr5	43066990	43066991	LOC100132356	100132356	81	CGI	TRUE	FALSE	FALSE
cg08709073	chr5	63802184	63802185	RGS7BP	401190	-266	CGI	TRUE	FALSE	FALSE
cg08740477	chr5	108084642	108084643	FER	2241	1118	CGI	TRUE	TRUE	FALSE
cg08761396	chr5	42468836	42468837	GHR	2690	44958	CGI	FALSE	TRUE	FALSE
cg08891656	chr5	95067697	95067698	RHOBTB3	22836	14359	CGI	TRUE	TRUE	FALSE
cg09012726	chr5	141266625	141266626	PCDH1	5097	-8680	CGI-S-Shelf	FALSE	FALSE	TRUE
cg09084391	chr5	346247	346248	AHRR	57491	41954	CGI-S-Shore	FALSE	TRUE	FALSE
cg09567642	chr5	70751435	70751436	BDP1	55814	-5	CGI	TRUE	FALSE	FALSE
cg09734469	chr5	3346779	3346780	LOC285577	285577	189427	Non-CGI	FALSE	FALSE	TRUE
cg09800012	chr5	131563605	131563606	P4HA2	8974	-48	CGI	TRUE	FALSE	FALSE
cg09809285	chr5	188949	188950	LRRC14B	389257	-2675	CGI	FALSE	TRUE	FALSE
cg09848727	chr5	149829370	149829371	RPS14	6208	-50	CGI	TRUE	FALSE	FALSE
cg09867268	chr5	956521	956522	LOC100506688	100506688	40932	CGI-S-Shore	FALSE	FALSE	TRUE
cg09901035	chr5	143163	143164	PLEKHG4B	153478	2789	CGI	FALSE	TRUE	FALSE
cg10190808	chr5	149829522	149829523	RPS14	6208	-202	CGI	TRUE	FALSE	FALSE
cg10210959	chr5	112257975	112257976	REEP5	7905	54	CGI	TRUE	FALSE	FALSE
cg10544510	chr5	3761226	3761227	IRX1	79192	165057	CGI	FALSE	FALSE	TRUE
cg10595449	chr5	134184476	134184477	C5orf24	134553	3105	CGI-S-Shelf	FALSE	TRUE	FALSE
cg10672508	chr5	172199157	172199158	DUSP1	1843	-953	CGI	TRUE	FALSE	FALSE
cg10795659	chr5	72415998	72415999	TMEM171	134285	-388	CGI	TRUE	FALSE	FALSE
cg11099930	chr5	36876680	36876681	NIPBL	25836	-179	CGI	TRUE	FALSE	FALSE
cg11100802	chr5	180688063	180688064	TRIM52	84851	54	CGI	TRUE	FALSE	FALSE
cg11112892	chr5	131563589	131563590	P4HA2	8974	-32	CGI	TRUE	FALSE	FALSE
cg11257429	chr5	178016796	178016797	COL23A1	91522	758	CGI	FALSE	TRUE	FALSE
cg11258089	chr5	59189791	59189792	PART1	25859	-593747	CGI	TRUE	TRUE	FALSE
cg11260904	chr5	134872029	134872030	NEUROG1	4762	-389	CGI	TRUE	FALSE	FALSE
cg11283154	chr5	55008216	55008217	SLC38A9	153129	336	CGI	TRUE	FALSE	FALSE
cg11444704	chr5	159738916	159738917	CCNJL	79616	27681	CGI	FALSE	TRUE	FALSE
cg11613229	chr5	119800742	119800743	PRR16	51334	722	CGI-S-Shore	FALSE	TRUE	FALSE
cg11757894	chr5	172198326	172198327	DUSP1	1843	-122	CGI	TRUE	FALSE	FALSE
cg11782779	chr5	31194008	31194009	CDH6	1004	245	CGI	FALSE	TRUE	FALSE
cg11825883	chr5	78907997	78907998	PAPD4	167153	-244	CGI-N-Shore	TRUE	FALSE	FALSE
cg11892243	chr5	140044482	140044483	WDR55	54853	97	CGI	TRUE	FALSE	FALSE
cg12148675	chr5	118604807	118604808	TNFAIP8	25816	388	CGI	FALSE	TRUE	FALSE
cg12182453	chr5	2206790	2206791	IRX4	50805	-323909	CGI-S-Shore	FALSE	FALSE	TRUE
cg12318857	chr5	140071230	140071231	HARS2	23438	211	CGI	TRUE	FALSE	FALSE
cg12539796	chr5	7850203	7850204	C5orf49	134121	1059	CGI	FALSE	TRUE	FALSE
cg12587766	chr5	38556435	38556436	MIR3650	100500824	1226	CGI	TRUE	TRUE	FALSE
cg12626968	chr5	43603169	43603170	NNT	23530	377	CGI	TRUE	TRUE	FALSE
cg12636108	chr5	176036956	176036957	GPRIN1	114787	173	CGI	FALSE	TRUE	FALSE
cg12661370	chr5	149340060	149340061	SLC26A2	1836	-238	CGI	TRUE	FALSE	FALSE
cg12938520	chr5	171881833	171881834	SH3PXD2B	285590	-305	CGI	TRUE	FALSE	FALSE
cg12964860	chr5	137514295	137514296	BRD8	10902	61	CGI	TRUE	FALSE	FALSE
cg13013671	chr5	114632084	114632085	CCDC112	153733	372	CGI	TRUE	TRUE	FALSE
cg13021278	chr5	159866414	159866415	PTTG1	9232	17548	CGI	FALSE	FALSE	TRUE
cg13305415	chr5	141697464	141697465	SPRY4	81848	7154	CGI-S-Shelf	FALSE	TRUE	FALSE
cg13566430	chr5	131992455	131992456	IL13	3596	-1408	CGI-S-Shore	TRUE	FALSE	FALSE
cg13570101	chr5	172661859	172661860	NKX2-5	1482	454	CGI	TRUE	FALSE	FALSE
cg13689918	chr5	177581058	177581059	NHP2	55651	-96	CGI	TRUE	FALSE	FALSE
cg13701615	chr5	271609	271610	PDCD6	10016	-125	CGI	TRUE	FALSE	FALSE
cg13707793	chr5	139045301	139045302	CXXC5	51523	16999	CGI-N-Shelf	FALSE	TRUE	FALSE
cg13711457	chr5	5494990	5494991	KIAA0947	23379	72182	CGI	FALSE	FALSE	TRUE
cg13898548	chr5	176924827	176924828	PDLIM7	9260	-224	CGI	TRUE	FALSE	FALSE
cg13917968	chr5	151504425	151504426	GLRA1	2741	-200027	Non-CGI	FALSE	TRUE	FALSE
cg13991635	chr5	131133339	131133340	RAPGEF6	51735	-582	CGI	TRUE	FALSE	FALSE
cg13995918	chr5	1280305	1280306	TERT	7015	14855	CGI	TRUE	TRUE	FALSE
cg14068146	chr5	176940708	176940709	DDX41	51428	3257	CGI-N-Shelf	FALSE	TRUE	FALSE
cg14474582	chr5	176924578	176924579	PDLIM7	9260	22	CGI	TRUE	FALSE	FALSE
cg14574910	chr5	2155809	2155810	IRX4	50805	-272928	CGI	FALSE	FALSE	TRUE
cg14704758	chr5	146888890	146888891	DPYSL3	1809	727	CGI	FALSE	TRUE	FALSE
cg14725924	chr5	6411956	6411957	MED10	84246	-33316	CGI	FALSE	FALSE	TRUE
cg14808378	chr5	466582	466583	PP7080	25845	6496	CGI-S-Shore	TRUE	TRUE	FALSE
cg14970666	chr5	2038989	2038990	IRX4	50805	-156108	CGI-S-Shore	FALSE	FALSE	TRUE
cg15016296	chr5	126853189	126853190	PRRC1	133619	-118	CGI-N-Shore	TRUE	FALSE	FALSE
cg15028904	chr5	140700449	140700450	TAF7	6879	-97	CGI	TRUE	FALSE	FALSE
cg15084390	chr5	475085	475086	PP7080	25845	-2004	CGI	FALSE	TRUE	FALSE
cg15100112	chr5	64331517	64331518	CWC27	10283	266761	CGI	FALSE	FALSE	TRUE
cg15168727	chr5	72599228	72599229	TMEM174	134288	130204	CGI	FALSE	FALSE	TRUE
cg15407517	chr5	78280882	78280883	ARSB	411	1473	CGI	TRUE	TRUE	FALSE
cg15609272	chr5	159894868	159894869	MIR3142	100422938	-6539	CGI	TRUE	FALSE	FALSE
cg15889838	chr5	131832312	131832313	IRF1	3659	-1052	CGI	TRUE	FALSE	FALSE
cg15897774	chr5	7869176	7869177	FASTKD3	79072	-25	CGI	TRUE	FALSE	FALSE
cg16091952	chr5	178488100	178488101	ZNF354C	30832	492	CGI	FALSE	TRUE	FALSE
cg16105594	chr5	88180095	88180096	MEF2C	4208	19825	CGI	TRUE	TRUE	FALSE
cg16230626	chr5	124298608	124298609	ZNF608	57507	-214107	Non-CGI	FALSE	FALSE	TRUE
cg16234172	chr5	142149390	142149391	ARHGAP26	23092	-900	CGI	TRUE	FALSE	FALSE
cg16253537	chr5	131132836	131132837	RAPGEF6	51735	-79	CGI	TRUE	FALSE	FALSE
cg16274199	chr5	121414067	121414068	LOX	4015	-11	CGI	TRUE	FALSE	FALSE
cg16280705	chr5	110408910	110408911	TSLP	85480	3131	CGI	FALSE	TRUE	FALSE
cg16343302	chr5	10649157	10649158	ANKRD33B	651746	84721	CGI-N-Shore	FALSE	TRUE	FALSE
cg16375290	chr5	177412718	177412719	PROP1	5626	10523	CGI	FALSE	FALSE	TRUE
cg16398128	chr5	16465888	16465889	ZNF622	90441	4	CGI	TRUE	FALSE	FALSE
cg16449302	chr5	108744973	108744974	PJA2	9867	700	CGI	FALSE	TRUE	FALSE
cg16533977	chr5	101834136	101834137	SLCO6A1	133482	582	CGI-N-Shore	FALSE	TRUE	FALSE
cg16599698	chr5	77590670	77590671	AP3B1	8546	-141	CGI	TRUE	FALSE	FALSE
cg16654732	chr5	170846517	170846518	FGF18	8817	-148	CGI	TRUE	FALSE	FALSE
cg16675054	chr5	171616574	171616575	STK10	6793	-1227	CGI	TRUE	FALSE	FALSE
cg16997104	chr5	1053643	1053644	MIR4635	100616479	9444	CGI	FALSE	TRUE	FALSE
cg17290488	chr5	179281560	179281561	C5orf45	51149	4278	CGI-N-Shelf	FALSE	TRUE	FALSE
cg17304712	chr5	1318519	1318520	MIR4457	100616235	-9026	CGI	TRUE	TRUE	FALSE
cg17328171	chr5	59105974	59105975	PART1	25859	-677564	CGI	FALSE	TRUE	FALSE
cg17339617	chr5	146608294	146608295	STK32A	202374	-6283	CGI-S-Shore	FALSE	FALSE	TRUE
cg17347471	chr5	52405518	52405519	MOCS2	4338	78	CGI	TRUE	TRUE	FALSE
cg17430818	chr5	145583220	145583221	RBM27	54439	56	CGI	TRUE	FALSE	FALSE
cg17433211	chr5	2007375	2007376	IRX4	50805	-124494	CGI	FALSE	FALSE	TRUE
cg17465305	chr5	68788117	68788118	OCLN	100506658	0	CGI-N-Shore	TRUE	FALSE	FALSE
cg17477893	chr5	80597509	80597510	ZCCHC9	84240	106	CGI	TRUE	TRUE	FALSE
cg17497066	chr5	34007883	34007884	AMACR	23600	335	CGI	TRUE	FALSE	FALSE
cg17546366	chr5	145724443	145724444	POU4F3	5459	5855	CGI	FALSE	FALSE	TRUE
cg17617527	chr5	142782415	142782416	NR3C1	2908	32660	CGI	TRUE	TRUE	FALSE
cg17633020	chr5	58335180	58335181	RAB3C	115827	456240	CGI	TRUE	TRUE	FALSE
cg17654660	chr5	176784965	176784966	RGS14	10636	120	CGI	TRUE	FALSE	FALSE
cg17671005	chr5	113391774	113391775	KCNN2	3781	-306240	CGI	FALSE	FALSE	TRUE
cg17802144	chr5	172756776	172756777	STC2	8614	-269	CGI	TRUE	FALSE	FALSE
cg17844160	chr5	53606416	53606417	ARL15	54622	-12	CGI	TRUE	FALSE	FALSE
cg17940783	chr5	139165098	139165099	PSD2	84249	-10306	CGI-N-Shelf	FALSE	FALSE	TRUE
cg17977043	chr5	893049	893050	TRIP13	9319	79	CGI	TRUE	FALSE	FALSE
cg18066271	chr5	100236783	100236784	ST8SIA4	7903	2202	CGI	FALSE	TRUE	FALSE
cg18096251	chr5	2205553	2205554	IRX4	50805	-322672	CGI-N-Shore	FALSE	FALSE	TRUE
cg18121224	chr5	176559563	176559564	NSD1	64324	-515	CGI	TRUE	FALSE	FALSE
cg18174928	chr5	38557085	38557086	MIR3650	100500824	576	CGI	TRUE	TRUE	FALSE
cg18175036	chr5	65892087	65892088	MAST4	375449	-87	CGI	TRUE	FALSE	FALSE
cg18247650	chr5	71616010	71616011	MRPS27	23107	72	CGI	TRUE	FALSE	FALSE
cg18363761	chr5	180650950	180650951	TRIM41	90933	686	CGI	TRUE	TRUE	FALSE
cg18388380	chr5	63802491	63802492	RGS7BP	401190	38	CGI	TRUE	FALSE	FALSE
cg18456349	chr5	271681	271682	PDCD6	10016	-53	CGI	TRUE	FALSE	FALSE
cg18530551	chr5	172670879	172670880	NKX2-5	1482	-8563	CGI	FALSE	FALSE	TRUE
cg18615402	chr5	176011567	176011568	GPRIN1	114787	25562	CGI	FALSE	TRUE	FALSE
cg18616062	chr5	9546347	9546348	LOC100505806	100505806	34	CGI	TRUE	FALSE	FALSE
cg18640183	chr5	131563610	131563611	P4HA2	8974	-53	CGI	TRUE	FALSE	FALSE
cg18764291	chr5	122110994	122110995	SNX2	6643	243	CGI	TRUE	TRUE	FALSE
cg19091621	chr5	176296830	176296831	HK3	3101	29501	CGI	FALSE	TRUE	FALSE
cg19238398	chr5	138775248	138775249	DNAJC18	202052	-33	CGI	TRUE	FALSE	FALSE
cg19472282	chr5	74907124	74907125	COL4A3BP	10087	-99317	CGI-N-Shore	TRUE	FALSE	FALSE
cg19510792	chr5	16935695	16935696	MYO10	4651	688	CGI	FALSE	TRUE	FALSE
cg19667623	chr5	149380025	149380026	HMGXB3	22993	-142	CGI	TRUE	TRUE	FALSE
cg19671565	chr5	95194609	95194610	C5orf27	202299	6672	CGI	FALSE	TRUE	FALSE
cg19697475	chr5	45696465	45696466	HCN1	348980	-244	CGI	TRUE	FALSE	FALSE
cg19739264	chr5	1344842	1344843	CLPTM1L	81037	158	CGI	TRUE	FALSE	FALSE
cg19755108	chr5	176434079	176434080	UIMC1	51720	-283	CGI-S-Shore	TRUE	FALSE	FALSE
cg19789021	chr5	95158141	95158142	GLRX	2745	434	CGI	FALSE	TRUE	FALSE
cg19885761	chr5	175223646	175223647	CPLX2	10814	35	CGI-N-Shore	TRUE	FALSE	FALSE
cg20403557	chr5	115299088	115299089	AQPEP	206338	936	CGI	TRUE	TRUE	FALSE
cg20405584	chr5	41870875	41870876	OXCT1	5019	-83	CGI	TRUE	FALSE	FALSE
cg20415170	chr5	95298066	95298067	ELL2	22936	-290	CGI	TRUE	FALSE	FALSE
cg20960405	chr5	176047485	176047486	MIR4281	100422962	9014	CGI	FALSE	TRUE	FALSE
cg21115484	chr5	170814542	170814543	NPM1	4869	-164	CGI	TRUE	FALSE	FALSE
cg21141143	chr5	60922694	60922695	C5orf64	285668	-10940	CGI-S-Shore	FALSE	TRUE	FALSE
cg21153026	chr5	130599493	130599494	CDC42SE2	56990	-207	CGI	TRUE	FALSE	FALSE
cg21153697	chr5	87437337	87437338	TMEM161B	153396	127326	CGI	FALSE	FALSE	TRUE
cg21161187	chr5	1416793	1416794	SLC6A3	6531	28748	CGI	FALSE	TRUE	FALSE
cg21199406	chr5	76250201	76250202	CRHBP	1393	1520	CGI	FALSE	TRUE	FALSE
cg21502771	chr5	32173527	32173528	GOLPH3	64083	896	CGI	FALSE	TRUE	FALSE
cg21606957	chr5	111753754	111753755	EPB41L4A	64097	1254	CGI-N-Shore	TRUE	TRUE	FALSE
cg21617058	chr5	57878882	57878883	RAB3C	115827	-55	CGI	TRUE	FALSE	FALSE
cg21744723	chr5	34839210	34839211	TTC23L	153657	-57	CGI	TRUE	FALSE	FALSE
cg21815550	chr5	107009036	107009037	EFNA5	1946	-2439	CGI	FALSE	FALSE	TRUE
cg21817673	chr5	141736862	141736863	SPRY4	81848	-32241	CGI	FALSE	FALSE	TRUE
cg21907156	chr5	79703652	79703653	ZFYVE16	9765	-184	CGI	TRUE	FALSE	FALSE
cg21950561	chr5	61699692	61699693	DIMT1	27292	34	CGI	TRUE	FALSE	FALSE
cg22010052	chr5	115298704	115298705	AQPEP	206338	552	CGI	TRUE	FALSE	FALSE
cg22044134	chr5	177891151	177891152	COL23A1	91522	126403	CGI	FALSE	TRUE	FALSE
cg22172610	chr5	79141661	79141662	MTX3	345778	145425	Non-CGI	FALSE	FALSE	TRUE
cg22185633	chr5	177026993	177026994	B4GALT7	11285	-124	CGI	TRUE	FALSE	FALSE
cg22227058	chr5	159846119	159846120	SLU7	10569	47	CGI	TRUE	FALSE	FALSE
[truncated: 20,544 more rows]
