# Supplementary material for: H3K4me1 marks DNA regions hypomethylated during aging in human stem and differentiated cells
Source: HighWire-hosted journal article supplement (doi:10.1101/gr.169011.113), 2014-09-30
Supplement: Supplemental_Table_18.xlsx [file Supplemental_Table_18.xlsx]

## Sheet: ST18
Supplemental Table 18: List of CpG sites where the decrease in Euclidean distance (ED) (> 2-fold) with age was lower than could be accounted for solely by interindividual variability
Target ID	Chromosome	start	end	nearest.gene	nearest.gene.id	disttotss	hmm.cpgi	prom.reg	intra.reg	inter.reg
cg00003202	chr1	151319512	151319513	RFX5	5993	255	CGI	FALSE	TRUE	FALSE
cg00007898	chr1	205180627	205180628	DSTYK	25778	98	CGI	TRUE	FALSE	FALSE
cg00021933	chr1	86082316	86082317	CYR61	3491	35871	CGI-S-Shore	FALSE	FALSE	TRUE
cg00097573	chr1	202830495	202830496	LOC148709	148709	-385	CGI	TRUE	TRUE	FALSE
cg00101986	chr1	25071756	25071757	CLIC4	25932	-2	CGI	TRUE	FALSE	FALSE
cg00114029	chr1	35351407	35351408	DLGAP3	58512	19575	CGI	FALSE	TRUE	FALSE
cg00115313	chr1	193029121	193029122	UCHL5	51377	114	CGI	TRUE	TRUE	FALSE
cg00309462	chr1	1840482	1840483	CALML6	163688	-5782	CGI	FALSE	FALSE	TRUE
cg00311883	chr1	235099120	235099121	SNORA14B	677802	192130	Non-CGI	FALSE	TRUE	FALSE
cg00325919	chr1	156595847	156595848	HAPLN2	60484	6760	CGI-S-Shore	FALSE	FALSE	TRUE
cg00354179	chr1	180881480	180881481	KIAA1614	57710	-831	CGI	TRUE	FALSE	FALSE
cg00396230	chr1	23037116	23037117	EPHB2	2048	-213	CGI	TRUE	FALSE	FALSE
cg00396407	chr1	226374726	226374727	ACBD3	64746	-302	CGI	TRUE	FALSE	FALSE
cg00543329	chr1	36235839	36235840	CLSPN	63967	-287	CGI-S-Shore	TRUE	FALSE	FALSE
cg00583535	chr1	201159906	201159907	IGFN1	91156	-45	Non-CGI	TRUE	FALSE	FALSE
cg00807959	chr1	48176281	48176282	FOXD2	2306	274591	CGI	FALSE	FALSE	TRUE
cg00913953	chr1	6189040	6189041	CHD5	26038	51152	CGI	FALSE	TRUE	FALSE
cg00968203	chr1	117284465	117284466	CD2	914	-12619	CGI	FALSE	FALSE	TRUE
cg00992913	chr1	156698515	156698516	RRNAD1	51093	251	CGI	TRUE	FALSE	FALSE
cg01022171	chr1	224033107	224033108	TP53BP2	7159	565	CGI	FALSE	TRUE	FALSE
cg01558040	chr1	116184423	116184424	VANGL1	81839	-149	CGI	TRUE	FALSE	FALSE
cg01717636	chr1	46216399	46216400	IPP	3652	84	CGI	TRUE	FALSE	FALSE
cg01786314	chr1	92950123	92950124	GFI1	2672	2308	CGI	TRUE	TRUE	FALSE
cg01787565	chr1	245318209	245318210	KIF26B	55083	-76	CGI	TRUE	FALSE	FALSE
cg01916743	chr1	2238932	2238933	LOC100129534	100129534	45166	CGI	FALSE	TRUE	FALSE
cg01932091	chr1	29213675	29213676	EPB41	2035	71	CGI	TRUE	FALSE	FALSE
cg02107269	chr1	27248138	27248139	NUDC	10726	-84	CGI	TRUE	TRUE	FALSE
cg02152120	chr1	118727840	118727841	SPAG17	200162	6	CGI	TRUE	FALSE	FALSE
cg02367828	chr1	1872033	1872034	TMEM52	339456	-21292	CGI	FALSE	FALSE	TRUE
cg02482614	chr1	995013	995014	RNF223	401934	14672	CGI	TRUE	FALSE	FALSE
cg02631286	chr1	32281722	32281723	SPOCD1	90853	-141	Non-CGI	TRUE	FALSE	FALSE
cg02971920	chr1	1095607	1095608	MIR200B	406984	-6875	CGI	FALSE	FALSE	TRUE
cg02994162	chr1	159915569	159915570	IGSF9	57549	-182	CGI	TRUE	FALSE	FALSE
cg03115835	chr1	26758846	26758847	DHDDS	79947	72	CGI	TRUE	FALSE	FALSE
cg03126043	chr1	205601084	205601085	ELK4	2005	48544	CGI	TRUE	TRUE	FALSE
cg03220945	chr1	205537877	205537878	MFSD4	148808	-233	CGI	TRUE	FALSE	FALSE
cg03227570	chr1	17766306	17766307	RCC2	55920	-55	CGI	TRUE	FALSE	FALSE
cg03258346	chr1	67896128	67896129	SERBP1	26135	-4	CGI	TRUE	FALSE	FALSE
cg03303757	chr1	11120145	11120146	SRM	6723	-53	CGI	TRUE	FALSE	FALSE
cg03401580	chr1	147142653	147142654	ACP6	51205	-18	CGI	TRUE	FALSE	FALSE
cg03421440	chr1	92414520	92414521	BRDT	676	-406	CGI-N-Shore	TRUE	FALSE	FALSE
cg03437914	chr1	155179138	155179139	THBS3	7059	-168	CGI	TRUE	TRUE	FALSE
cg03546360	chr1	12675968	12675969	DHRS3	9249	1850	CGI-N-Shore	FALSE	TRUE	FALSE
cg03607891	chr1	66099615	66099616	PDE4B	5142	-158576	Non-CGI	FALSE	TRUE	FALSE
cg03614954	chr1	24439418	24439419	MYOM3	127294	-752	CGI-S-Shore	TRUE	FALSE	FALSE
cg03636215	chr1	38512601	38512602	POU3F1	5453	-150	CGI	TRUE	FALSE	FALSE
cg03716942	chr1	1821981	1821982	GNB1	2782	543	CGI	FALSE	TRUE	FALSE
cg03745244	chr1	16399725	16399726	FAM131C	348487	400	CGI	FALSE	TRUE	FALSE
cg03884587	chr1	177150934	177150935	FAM5B	57795	10300	CGI	FALSE	TRUE	FALSE
cg04080067	chr1	205601196	205601197	ELK4	2005	48432	CGI	TRUE	TRUE	FALSE
cg04083753	chr1	9258836	9258837	H6PD	9563	-36025	CGI	FALSE	FALSE	TRUE
cg04134399	chr1	246231142	246231143	SMYD3	64754	439500	Non-CGI	FALSE	TRUE	FALSE
cg04275664	chr1	89149955	89149956	PKN2	5586	32	CGI	TRUE	TRUE	FALSE
cg04570362	chr1	9871402	9871403	CLSTN1	22883	13146	Non-CGI	FALSE	TRUE	FALSE
cg04837461	chr1	212587676	212587677	TMEM206	55248	589	CGI	FALSE	TRUE	FALSE
cg04845625	chr1	202287435	202287436	UBE2T	29089	23657	CGI	FALSE	TRUE	FALSE
cg04910183	chr1	193090988	193090989	CDC73	79577	-98	CGI	TRUE	FALSE	FALSE
cg05270922	chr1	101775452	101775453	S1PR1	1901	73146	CGI	FALSE	FALSE	TRUE
cg05301102	chr1	180992117	180992118	STX6	10228	-70	CGI	TRUE	FALSE	FALSE
cg05365220	chr1	94375159	94375160	GCLM	2730	-146	CGI	TRUE	FALSE	FALSE
cg05393563	chr1	45672071	45672072	ZSWIM5	57643	177	CGI	TRUE	FALSE	FALSE
cg05710142	chr1	33223592	33223593	KIAA1522	57648	16079	CGI-S-Shelf	FALSE	TRUE	FALSE
cg05803631	chr1	7844446	7844447	PER3	8863	65	CGI	TRUE	TRUE	FALSE
cg06057576	chr1	27719045	27719046	GPR3	2827	-105	CGI	TRUE	FALSE	FALSE
cg06092654	chr1	202780290	202780291	KDM5B	10765	-2740	CGI	FALSE	FALSE	TRUE
cg06187080	chr1	232573578	232573579	SIPA1L2	57568	77663	Non-CGI	FALSE	TRUE	FALSE
cg06219821	chr1	12290367	12290368	VPS13D	55187	253	CGI	FALSE	TRUE	FALSE
cg06444984	chr1	153651297	153651298	NPR1	4881	132	CGI	TRUE	FALSE	FALSE
cg06528214	chr1	178995107	178995108	FAM20B	9917	32	CGI	TRUE	FALSE	FALSE
cg06620092	chr1	114697523	114697524	SYT6	148281	-1050	CGI	TRUE	FALSE	FALSE
cg06637812	chr1	203293433	203293434	BTG2	7832	18768	CGI-N-Shelf	FALSE	FALSE	TRUE
cg06646682	chr1	1273442	1273443	TAS1R3	83756	6715	CGI	FALSE	TRUE	FALSE
cg06753883	chr1	12079449	12079450	MIIP	60672	149	CGI	TRUE	FALSE	FALSE
cg06765909	chr1	36396899	36396900	2003-08-01	192669	579	CGI	TRUE	TRUE	FALSE
cg06842519	chr1	85666970	85666971	SYDE2	84144	-241	CGI	TRUE	FALSE	FALSE
cg06852298	chr1	247615658	247615659	OR2B11	127623	-373	CGI-S-Shore	TRUE	FALSE	FALSE
cg06872500	chr1	153508523	153508524	S100A6	6277	192	CGI	TRUE	FALSE	FALSE
cg06934615	chr1	183441736	183441737	SMG7	9887	229	CGI	TRUE	FALSE	FALSE
cg06936155	chr1	91192451	91192452	BARHL2	343472	-9656	CGI	FALSE	FALSE	TRUE
cg06942637	chr1	153633895	153633896	SNAPIN	23557	2749	CGI-S-Shelf	FALSE	TRUE	FALSE
cg06982544	chr1	150254546	150254547	C1orf51	148523	-405	CGI	TRUE	FALSE	FALSE
cg06982917	chr1	43282933	43282934	CCDC23	374969	124	CGI	TRUE	TRUE	FALSE
cg06985534	chr1	117909609	117909610	MAN1A2	10905	-474	CGI	TRUE	FALSE	FALSE
cg06985721	chr1	55464653	55464654	BSND	7809	35	CGI-S-Shore	TRUE	FALSE	FALSE
cg07015775	chr1	86174125	86174126	ZNHIT6	54680	-8	CGI	TRUE	FALSE	FALSE
cg07103618	chr1	228337366	228337367	GJC2	57165	-47	Non-CGI	TRUE	FALSE	FALSE
cg07172756	chr1	22213908	22213909	HSPG2	3339	49840	CGI	FALSE	TRUE	FALSE
cg07201754	chr1	39491318	39491319	NDUFS5	4725	-647	CGI-N-Shore	TRUE	FALSE	FALSE
cg07219542	chr1	110210770	110210771	GSTM2	2946	12071	CGI	TRUE	TRUE	FALSE
cg07221967	chr1	18969717	18969718	PAX7	5081	12216	CGI	FALSE	TRUE	FALSE
cg07243241	chr1	35545205	35545206	ZMYM1	79830	232	CGI	FALSE	TRUE	FALSE
cg07344096	chr1	7724122	7724123	VAMP3	9341	-107205	CGI	FALSE	TRUE	FALSE
cg07398561	chr1	114447571	114447572	AP4B1	10717	168	CGI	TRUE	FALSE	FALSE
cg07425541	chr1	236305663	236305664	GPR137B	7107	-167	CGI	TRUE	FALSE	FALSE
cg07479786	chr1	150967828	150967829	FAM63A	55793	13024	Non-CGI	FALSE	TRUE	FALSE
cg07502168	chr1	214725311	214725312	PTPN14	5784	-286	CGI	TRUE	FALSE	FALSE
cg07574241	chr1	26126996	26126997	SEPN1	57190	328	CGI	FALSE	TRUE	FALSE
cg07706442	chr1	84971874	84971875	GNG5	2787	386	CGI	TRUE	TRUE	FALSE
cg07788537	chr1	2799876	2799877	TTC34	100287898	-93645	CGI	FALSE	FALSE	TRUE
cg08104202	chr1	169396712	169396713	C1orf114	57821	33193	CGI	TRUE	TRUE	FALSE
cg08125719	chr1	205012449	205012450	CNTN2	6900	383	CGI	TRUE	TRUE	FALSE
cg08128087	chr1	33593457	33593458	ADC	113451	46742	CGI-S-Shore	FALSE	FALSE	TRUE
cg08277003	chr1	26827064	26827065	HMGN2	3151	28161	CGI	FALSE	FALSE	TRUE
cg08457158	chr1	41367714	41367715	CITED4	163732	-39695	Non-CGI	FALSE	FALSE	TRUE
cg08458292	chr1	57890610	57890611	C8B	732	-458921	CGI	TRUE	TRUE	FALSE
cg08468991	chr1	109506060	109506061	CLCC1	23155	49	CGI	TRUE	FALSE	FALSE
cg08623154	chr1	154192647	154192648	UBAP2L	9898	-6	CGI-N-Shore	TRUE	TRUE	FALSE
cg08638697	chr1	45454370	45454371	EIF2B3	8891	-2008	CGI-S-Shore	FALSE	FALSE	TRUE
cg08661290	chr1	6674110	6674111	PHF13	148479	353	CGI	TRUE	FALSE	FALSE
cg08844894	chr1	12226961	12226962	TNFRSF1B	7133	-97	CGI	TRUE	FALSE	FALSE
cg08857729	chr1	67217826	67217827	TCTEX1D1	200132	-312	CGI	TRUE	FALSE	FALSE
cg08894131	chr1	147231061	147231062	GJA5	2702	14421	Non-CGI	TRUE	TRUE	FALSE
cg08930741	chr1	59369549	59369550	LOC100131060	100131060	118725	CGI	FALSE	FALSE	TRUE
cg09107855	chr1	100598443	100598444	SASS6	163786	66	CGI	TRUE	FALSE	FALSE
cg09258327	chr1	236305010	236305011	GPR137B	7107	-820	CGI	TRUE	FALSE	FALSE
cg09318375	chr1	67218090	67218091	TCTEX1D1	200132	-48	CGI	TRUE	FALSE	FALSE
cg09327714	chr1	91316253	91316254	BARHL2	343472	-133458	CGI-N-Shore	FALSE	TRUE	FALSE
cg09510180	chr1	10895978	10895979	CASZ1	54897	-39270	CGI	FALSE	FALSE	TRUE
cg09583777	chr1	94703079	94703080	ARHGAP29	9411	37543	CGI	TRUE	TRUE	FALSE
cg09767598	chr1	220960017	220960018	MARC1	64757	-20	CGI-N-Shore	TRUE	FALSE	FALSE
cg09791324	chr1	154973945	154973946	ZBTB7B	51043	-1159	CGI	TRUE	FALSE	FALSE
cg09799690	chr1	247267708	247267709	ZNF669	79862	-33	CGI	TRUE	FALSE	FALSE
cg09865676	chr1	43389888	43389889	SLC2A1-AS1	440584	-34830	CGI	FALSE	FALSE	TRUE
cg09896346	chr1	23751195	23751196	TCEA3	6920	64	CGI	TRUE	FALSE	FALSE
cg10011777	chr1	2451511	2451512	PANK4	55229	6522	CGI	FALSE	TRUE	FALSE
cg10174867	chr1	225117431	225117432	DNAH14	127602	74	CGI	TRUE	FALSE	FALSE
cg10180406	chr1	186649877	186649878	PTGS2	5743	-317	CGI	TRUE	FALSE	FALSE
cg10231603	chr1	155829206	155829207	GON4L	54856	-14	CGI	TRUE	FALSE	FALSE
cg10430904	chr1	45769554	45769555	LOC400752	400752	-26	CGI	TRUE	FALSE	FALSE
cg10445911	chr1	154971922	154971923	ZBTB7B	51043	-3182	CGI	FALSE	FALSE	TRUE
cg10503906	chr1	35545014	35545015	ZMYM1	79830	41	CGI	TRUE	FALSE	FALSE
cg10577937	chr1	26798947	26798948	HMGN2	3151	44	CGI	TRUE	FALSE	FALSE
cg10626816	chr1	39025249	39025250	MYCBP	26292	313799	CGI	FALSE	FALSE	TRUE
cg10700634	chr1	6566528	6566529	PLEKHG5	57449	13539	CGI	FALSE	TRUE	FALSE
cg10705488	chr1	1550648	1550649	MIB2	142678	-145	CGI	TRUE	FALSE	FALSE
cg10801633	chr1	10579190	10579191	PEX14	5195	44186	Non-CGI	FALSE	TRUE	FALSE
cg10965041	chr1	28415294	28415295	EYA3	2140	-145	CGI	TRUE	FALSE	FALSE
cg10966083	chr1	220701817	220701818	MARK1	4139	248	CGI	TRUE	FALSE	FALSE
cg11157172	chr1	3210417	3210418	ARHGEF16	27237	-160728	CGI	FALSE	TRUE	FALSE
cg11332484	chr1	20208967	20208968	OTUD3	23252	78	CGI	TRUE	FALSE	FALSE
cg11333835	chr1	23495430	23495431	LUZP1	7798	8869	CGI	TRUE	TRUE	FALSE
cg11531628	chr1	27930643	27930644	AHDC1	27245	-281	CGI	TRUE	FALSE	FALSE
cg11717506	chr1	113498382	113498383	SLC16A1	6566	591	CGI	TRUE	TRUE	FALSE
cg11726631	chr1	955757	955758	AGRN	375790	253	CGI	FALSE	TRUE	FALSE
cg11732257	chr1	235492059	235492060	GGPS1	9453	305	CGI	TRUE	TRUE	FALSE
cg11953245	chr1	228291591	228291592	C1orf35	79169	-568	CGI-S-Shore	TRUE	FALSE	FALSE
cg11976407	chr1	33814857	33814858	MIR3605	100500853	-16763	CGI	FALSE	TRUE	FALSE
cg12092561	chr1	11538840	11538841	PTCHD2	57540	-453	CGI	TRUE	FALSE	FALSE
cg12177922	chr1	154245232	154245233	HAX1	10456	192	CGI	TRUE	FALSE	FALSE
cg12178578	chr1	45792714	45792715	HPDL	84842	168	CGI	TRUE	FALSE	FALSE
cg12391964	chr1	1986275	1986276	PRKCZ	5590	4365	CGI-S-Shore	FALSE	TRUE	FALSE
cg12396969	chr1	27319532	27319533	TRNP1	388610	-661	CGI-N-Shore	TRUE	TRUE	FALSE
cg12470011	chr1	205473662	205473663	CDK18	5129	-20	CGI-N-Shore	TRUE	FALSE	FALSE
cg12483545	chr1	2198879	2198880	SKI	6497	38744	CGI-S-Shore	FALSE	TRUE	FALSE
cg12551635	chr1	27994779	27994780	IFI6	2537	3943	CGI	FALSE	TRUE	FALSE
cg12578791	chr1	94884189	94884190	ABCD3	5825	255	CGI	FALSE	TRUE	FALSE
cg12629875	chr1	247171403	247171404	ZNF695	57116	-7	CGI	TRUE	TRUE	FALSE
cg12663426	chr1	155115785	155115786	DPM3	54344	-2788	CGI-S-Shelf	FALSE	FALSE	TRUE
cg12688521	chr1	5772057	5772058	MIR4417	100616489	147925	CGI-N-Shore	FALSE	FALSE	TRUE
cg12769657	chr1	201140721	201140722	TMEM9	252839	-18	CGI	TRUE	FALSE	FALSE
cg12798157	chr1	19600719	19600720	AKR7L	246181	-150	CGI	TRUE	FALSE	FALSE
cg13053783	chr1	1334803	1334804	CCNL2	81669	-84	CGI	TRUE	FALSE	FALSE
cg13059411	chr1	112533221	112533222	KCND3	3752	-1443	CGI	TRUE	FALSE	FALSE
cg13065121	chr1	204159498	204159499	KISS1	3814	6119	CGI-N-Shore	FALSE	TRUE	FALSE
cg13132577	chr1	60392140	60392141	CYP2J2	1573	281	CGI-N-Shore	FALSE	TRUE	FALSE
cg13168877	chr1	1896470	1896471	KIAA1751	85452	38804	CGI	FALSE	TRUE	FALSE
cg13175786	chr1	3159615	3159616	MIR4251	100422968	115075	CGI	FALSE	TRUE	FALSE
cg13183282	chr1	155948244	155948245	ARHGEF2	9181	11618	CGI	TRUE	TRUE	FALSE
cg13195796	chr1	39491975	39491976	NDUFS5	4725	7	CGI	TRUE	FALSE	FALSE
cg13202122	chr1	65886182	65886183	LEPR	3953	50	CGI	TRUE	FALSE	FALSE
cg13400003	chr1	111683051	111683052	DRAM2	128338	-212	CGI	TRUE	TRUE	FALSE
cg13430225	chr1	53662423	53662424	CPT2	1376	321	CGI	TRUE	FALSE	FALSE
cg13440781	chr1	168148262	168148263	TIPRL	261726	90	CGI	TRUE	FALSE	FALSE
cg13444964	chr1	236687053	236687054	LGALS8-AS1	100287902	753	CGI	TRUE	TRUE	FALSE
cg13562446	chr1	51702078	51702079	RNF11	26994	132	CGI	TRUE	FALSE	FALSE
cg13576006	chr1	154193656	154193657	C1orf43	25912	-382	CGI	TRUE	TRUE	FALSE
cg13976876	chr1	192778160	192778161	RGS2	5997	-7	CGI	TRUE	FALSE	FALSE
cg14155482	chr1	151171082	151171083	PIP5K1A	8394	60	CGI	TRUE	FALSE	FALSE
cg14170756	chr1	16563782	16563783	RSG1	79363	-122	CGI	TRUE	FALSE	FALSE
cg14175690	chr1	119527638	119527639	TBX15	6913	4539	CGI	FALSE	TRUE	FALSE
cg14222140	chr1	24711941	24711942	STPG1	90529	29644	Non-CGI	FALSE	TRUE	FALSE
cg14416284	chr1	160068509	160068510	IGSF8	93185	107	CGI	TRUE	TRUE	FALSE
cg14561217	chr1	210425254	210425255	SERTAD4-AS1	574036	-17787	CGI	FALSE	FALSE	TRUE
cg14599015	chr1	205210699	205210700	TMCC2	9911	13660	CGI-N-Shore	FALSE	TRUE	FALSE
cg14653225	chr1	228003938	228003939	PRSS38	339501	519	CGI	FALSE	TRUE	FALSE
cg14661946	chr1	116694919	116694920	MAB21L3	126868	40542	CGI	FALSE	FALSE	TRUE
cg14793596	chr1	1290092	1290093	DVL1	1855	-5599	CGI	FALSE	TRUE	FALSE
cg14976971	chr1	229478633	229478634	CCSAP	126731	53	CGI	FALSE	TRUE	FALSE
cg14978994	chr1	1978115	1978116	PRKCZ	5590	-3792	CGI-S-Shore	FALSE	FALSE	TRUE
cg15057150	chr1	206680618	206680619	RASSF5	83593	-259	CGI	TRUE	FALSE	FALSE
cg15472574	chr1	43148457	43148458	YBX1	4904	390	CGI	FALSE	TRUE	FALSE
cg15472784	chr1	3663531	3663532	TP73-AS1	57212	404	CGI	TRUE	FALSE	FALSE
cg15487867	chr1	1475742	1475743	TMEM240	339453	-1	CGI	TRUE	FALSE	FALSE
cg15525053	chr1	211688778	211688779	RD3	343035	-22518	CGI	FALSE	FALSE	TRUE
cg15551144	chr1	41707379	41707380	SCMH1	22955	434	CGI	FALSE	TRUE	FALSE
cg15578091	chr1	236908064	236908065	MTR	4548	-50515	Non-CGI	FALSE	TRUE	FALSE
cg15578948	chr1	1689012	1689013	SLC35E2B	728661	-11573	CGI	FALSE	TRUE	FALSE
cg15601228	chr1	21996376	21996377	RAP1GAP	5909	-519	CGI-S-Shore	TRUE	FALSE	FALSE
cg15651650	chr1	205425005	205425006	MIR135B	442891	-7478	CGI	TRUE	FALSE	FALSE
cg15727564	chr1	94713218	94713219	ARHGAP29	9411	27404	CGI	FALSE	TRUE	FALSE
cg15819225	chr1	3583333	3583334	TP73	7161	14203	Non-CGI	FALSE	TRUE	FALSE
cg15841063	chr1	63789500	63789501	FOXD3	27022	769	CGI	TRUE	FALSE	FALSE
cg15892785	chr1	6309343	6309344	HES3	390992	5090	CGI	FALSE	TRUE	FALSE
cg15936121	chr1	153700431	153700432	INTS3	65123	-116	CGI	TRUE	FALSE	FALSE
cg16136678	chr1	8021749	8021750	PARK7	11315	34	CGI	TRUE	FALSE	FALSE
cg16253132	chr1	113249942	113249943	RHOC	389	81	CGI	TRUE	FALSE	FALSE
cg16277706	chr1	90287101	90287102	LRRC8D	55144	527	CGI	TRUE	TRUE	FALSE
cg16352085	chr1	859719	859720	SAMD11	148398	-809	CGI	TRUE	FALSE	FALSE
cg16370716	chr1	161129255	161129256	USP21	27005	0	CGI	TRUE	FALSE	FALSE
cg16431705	chr1	85742210	85742211	LOC646626	646626	168	CGI	TRUE	FALSE	FALSE
cg16490470	chr1	208390388	208390389	PLXNA2	5362	27275	CGI-N-Shore	TRUE	TRUE	FALSE
cg16546681	chr1	155244518	155244519	HCN3	57657	-2854	CGI-S-Shore	TRUE	TRUE	FALSE
cg16582156	chr1	110091224	110091225	GNAI3	2773	37	CGI	TRUE	FALSE	FALSE
cg16717690	chr1	1208709	1208710	UBE2J2	118424	523	CGI	FALSE	TRUE	FALSE
cg16897415	chr1	161129615	161129616	USP21	27005	360	CGI	FALSE	TRUE	FALSE
cg16986315	chr1	19181291	19181292	TAS1R2	80834	4862	CGI	FALSE	TRUE	FALSE
cg17080709	chr1	110091589	110091590	GNAI3	2773	402	CGI	FALSE	TRUE	FALSE
cg17099671	chr1	2517236	2517237	FAM213B	127281	-661	CGI-N-Shore	TRUE	FALSE	FALSE
cg17170583	chr1	156721123	156721124	MRPL24	79590	-10199	CGI	TRUE	TRUE	FALSE
cg17175208	chr1	6241179	6241180	CHD5	26038	-984	CGI	TRUE	FALSE	FALSE
cg17239678	chr1	38273928	38273929	YRDC	79693	-62	CGI	TRUE	FALSE	FALSE
cg17252808	chr1	178994930	178994931	FAM20B	9917	-142	CGI	TRUE	FALSE	FALSE
cg17422926	chr1	2159369	2159370	SKI	6497	-763	CGI	TRUE	FALSE	FALSE
cg17427154	chr1	246887380	246887381	SCCPDH	51097	1	CGI	TRUE	FALSE	FALSE
cg17427639	chr1	20803085	20803086	CAMK2N1	55450	9641	CGI	FALSE	FALSE	TRUE
cg17429900	chr1	184724195	184724196	EDEM3	80267	-153	CGI	TRUE	FALSE	FALSE
cg17454086	chr1	155903354	155903355	KIAA0907	22889	832	CGI-N-Shore	FALSE	TRUE	FALSE
cg17477995	chr1	8085641	8085642	ERRFI1	54206	750	CGI-N-Shore	FALSE	TRUE	FALSE
cg17486066	chr1	34330045	34330046	HMGB4	127540	3968	Non-CGI	TRUE	TRUE	FALSE
cg17603057	chr1	26232820	26232821	MIR3917	100500808	123	CGI	TRUE	TRUE	FALSE
cg17725100	chr1	111098247	111098248	KCNA10	3744	-36449	CGI	FALSE	FALSE	TRUE
cg17800649	chr1	11159423	11159424	EXOSC10	5394	513	CGI	FALSE	TRUE	FALSE
cg17804627	chr1	35325459	35325460	SMIM12	113444	-41	CGI	TRUE	FALSE	FALSE
cg17808634	chr1	4275141	4275142	LOC284661	284661	-196968	Non-CGI	FALSE	FALSE	TRUE
cg17824277	chr1	13838127	13838128	LRRC38	126755	2113	CGI-N-Shore	FALSE	TRUE	FALSE
cg17874478	chr1	48937653	48937654	SPATA6	54558	221	CGI	TRUE	FALSE	FALSE
cg17882959	chr1	160231874	160231875	DCAF8	50717	23065	CGI	FALSE	TRUE	FALSE
cg18021393	chr1	145516084	145516085	GNRHR2	114814	-7	CGI	TRUE	FALSE	FALSE
cg18085998	chr1	33938224	33938225	ZSCAN20	7579	-6	CGI	TRUE	FALSE	FALSE
cg18149508	chr1	10532693	10532694	DFFA	1676	-79	CGI	TRUE	FALSE	FALSE
cg18163627	chr1	11071588	11071589	TARDBP	23435	-1089	CGI-N-Shore	TRUE	FALSE	FALSE
cg18174052	chr1	183604830	183604831	ARPC5	10092	153	CGI	TRUE	FALSE	FALSE
cg18194483	chr1	44064515	44064516	KDM4A	9682	-51280	CGI-S-Shore	TRUE	TRUE	FALSE
cg18232828	chr1	10846092	10846093	CASZ1	54897	10613	Non-CGI	FALSE	TRUE	FALSE
cg18289048	chr1	225615672	225615673	LBR	3930	883	CGI	TRUE	TRUE	FALSE
cg18387343	chr1	27248345	27248346	NUDC	10726	120	CGI	TRUE	TRUE	FALSE
cg18539461	chr1	201709675	201709676	MIR1231	100302158	-68062	CGI	FALSE	TRUE	FALSE
cg18793088	chr1	201798611	201798612	IPO9	55705	322	CGI	FALSE	TRUE	FALSE
cg18892537	chr1	151966104	151966105	S100A10	6281	608	CGI	TRUE	TRUE	FALSE
cg18966232	chr1	3183165	3183166	MIR4251	100422968	138625	CGI	FALSE	TRUE	FALSE
cg18976046	chr1	1118391	1118392	TTLL10	254173	9104	CGI	FALSE	TRUE	FALSE
cg19234509	chr1	115124245	115124246	BCAS2	10286	18	CGI	TRUE	TRUE	FALSE
cg19282714	chr1	17445929	17445930	PADI2	11240	17	CGI	TRUE	FALSE	FALSE
cg19370322	chr1	39456833	39456834	AKIRIN1	79647	-81	CGI	TRUE	FALSE	FALSE
cg19375880	chr1	43353441	43353442	ZNF691	51058	41196	CGI	FALSE	TRUE	FALSE
cg19406040	chr1	110527169	110527170	AHCYL1	10768	-216	CGI-N-Shore	TRUE	FALSE	FALSE
cg19507727	chr1	233086292	233086293	NTPCR	84284	-76	CGI	TRUE	FALSE	FALSE
cg19508561	chr1	32740758	32740759	HDAC1	3065	-16948	CGI	FALSE	TRUE	FALSE
cg19624489	chr1	50022440	50022441	AGBL4	84871	467184	CGI	FALSE	TRUE	FALSE
cg19628481	chr1	4844111	4844112	AJAP1	55966	129005	CGI-S-Shore	FALSE	FALSE	TRUE
cg19775916	chr1	117284396	117284397	CD2	914	-12688	CGI-N-Shore	FALSE	FALSE	TRUE
cg19857564	chr1	92545888	92545889	BTBD8	284697	25	CGI	TRUE	FALSE	FALSE
cg19928739	chr1	2089555	2089556	C1orf86	199990	49615	CGI	FALSE	TRUE	FALSE
cg19937480	chr1	45987798	45987799	PRDX1	5052	762	CGI	TRUE	TRUE	FALSE
cg20014778	chr1	229761614	229761615	TAF5L	27097	178	CGI	TRUE	TRUE	FALSE
cg20256117	chr1	1093335	1093336	MIR200B	406984	-9147	CGI	FALSE	FALSE	TRUE
cg20275932	chr1	23695367	23695368	C1orf213	148898	-95	CGI	TRUE	TRUE	FALSE
cg20330021	chr1	155036303	155036304	EFNA3	1944	89	CGI	TRUE	FALSE	FALSE
cg20386875	chr1	228675901	228675902	RNF187	149603	832	CGI-S-Shore	TRUE	TRUE	FALSE
cg20685020	chr1	44440676	44440677	ATP6V0B	533	73	CGI	TRUE	FALSE	FALSE
cg20799547	chr1	24969494	24969495	SRRM1	10250	-98	CGI	TRUE	FALSE	FALSE
cg20802051	chr1	65613403	65613404	AK4	205	170	CGI	TRUE	TRUE	FALSE
cg21106418	chr1	1613911	1613912	MMP23A	8511	-17465	CGI	FALSE	TRUE	FALSE
cg21142904	chr1	158047439	158047440	LOC646268	646268	62989	Non-CGI	FALSE	TRUE	FALSE
cg21164723	chr1	214776304	214776305	CENPF	1063	-226	CGI	TRUE	FALSE	FALSE
cg21167817	chr1	3277557	3277558	ARHGEF16	27237	-93588	CGI	FALSE	TRUE	FALSE
cg21173317	chr1	1478665	1478666	TMEM240	339453	-2924	CGI	FALSE	TRUE	FALSE
cg21266749	chr1	226249703	226249704	H3F3A	3020	-703	CGI	TRUE	FALSE	FALSE
cg21421701	chr1	212872679	212872680	BATF3	55509	646	CGI	FALSE	TRUE	FALSE
cg21472468	chr1	146522878	146522879	LOC728989	728989	-8278	CGI-S-Shore	FALSE	FALSE	TRUE
cg21474509	chr1	36235489	36235490	CLSPN	63967	60	CGI	TRUE	FALSE	FALSE
cg21540765	chr1	200008933	200008934	NR5A2	2494	12162	CGI	FALSE	TRUE	FALSE
cg21583850	chr1	112532802	112532803	KCND3	3752	-1024	CGI	TRUE	FALSE	FALSE
cg21680979	chr1	204485559	204485560	MDM4	4194	51	CGI	TRUE	FALSE	FALSE
cg21689812	chr1	156571355	156571356	GPATCH4	54865	-75	CGI	TRUE	FALSE	FALSE
cg21864563	chr1	44584417	44584418	KLF17	128209	70386	CGI-N-Shore	TRUE	TRUE	FALSE
cg21959316	chr1	85040158	85040159	CTBS	1486	3	CGI	TRUE	FALSE	FALSE
cg22221669	chr1	145438279	145438280	TXNIP	10628	-181	CGI	TRUE	FALSE	FALSE
cg22225298	chr1	179339155	179339156	AXDND1	126859	4299	CGI-S-Shelf	TRUE	TRUE	FALSE
cg22333836	chr1	95392125	95392126	CNN3	1266	608	CGI	TRUE	TRUE	FALSE
cg22428023	chr1	36851581	36851582	STK40	83931	-95	CGI	TRUE	FALSE	FALSE
cg22438763	chr1	47900256	47900257	FOXD2-AS1	84793	55	CGI	TRUE	FALSE	FALSE
cg22443241	chr1	114447798	114447799	AP4B1	10717	-56	CGI	TRUE	FALSE	FALSE
cg22500102	chr1	207226830	207226831	YOD1	55432	-504	CGI	TRUE	TRUE	FALSE
cg22500132	chr1	155162752	155162753	MUC1	4582	-45	CGI-S-Shore	TRUE	FALSE	FALSE
cg22501998	chr1	38155367	38155368	C1orf109	54955	2519	CGI-N-Shore	FALSE	TRUE	FALSE
cg22513511	chr1	151162618	151162619	VPS72	6944	20	CGI	TRUE	FALSE	FALSE
cg22517653	chr1	2918612	2918613	ACTRT2	140625	-19432	CGI	FALSE	FALSE	TRUE
cg22706424	chr1	31769819	31769820	ZCCHC17	51538	-21	CGI	TRUE	FALSE	FALSE
cg22802111	chr1	160068614	160068615	IGSF8	93185	2	CGI	TRUE	FALSE	FALSE
cg22855438	chr1	67395917	67395918	MIER1	57708	5338	CGI	TRUE	TRUE	FALSE
cg22876327	chr1	202927122	202927123	ADIPOR1	51094	576	CGI	FALSE	TRUE	FALSE
cg23010538	chr1	190447290	190447291	FAM5C	339479	-530	CGI-N-Shore	TRUE	FALSE	FALSE
cg23020486	chr1	236558874	236558875	EDARADD	128178	1193	CGI	TRUE	TRUE	FALSE
cg23051879	chr1	165667556	165667557	ALDH9A1	223	342	CGI	TRUE	TRUE	FALSE
cg23075983	chr1	59281540	59281541	LOC100131060	100131060	30716	CGI	FALSE	TRUE	FALSE
cg23114771	chr1	17294772	17294773	MFAP2	4237	13307	Non-CGI	TRUE	TRUE	FALSE
cg23132469	chr1	19181459	19181460	TAS1R2	80834	4694	CGI-S-Shore	FALSE	TRUE	FALSE
cg23205692	chr1	25664452	25664453	C1orf63	57035	202	CGI	TRUE	FALSE	FALSE
cg23234149	chr1	3615561	3615562	TP73	7161	46431	CGI	FALSE	TRUE	FALSE
cg23234434	chr1	43390705	43390706	SLC2A1-AS1	440584	-34013	CGI-S-Shore	FALSE	FALSE	TRUE
cg23267042	chr1	70671309	70671310	LRRC40	55631	50	CGI	TRUE	FALSE	FALSE
cg23274377	chr1	220263237	220263238	BPNT1	10380	-45	CGI	TRUE	TRUE	FALSE
cg23274604	chr1	224517835	224517836	NVL	4931	54	CGI	TRUE	FALSE	FALSE
cg23281832	chr1	119683332	119683333	WARS2	10352	-36	CGI	TRUE	FALSE	FALSE
cg23593528	chr1	197871600	197871601	C1orf53	388722	-80	CGI-N-Shore	TRUE	FALSE	FALSE
cg23599104	chr1	109656320	109656321	C1orf194	127003	157	CGI	TRUE	FALSE	FALSE
cg23815582	chr1	220101945	220101946	SLC30A10	55532	30042	CGI	TRUE	TRUE	FALSE
cg23842890	chr1	11968979	11968980	KIAA2013	90231	17504	CGI	FALSE	FALSE	TRUE
cg23844174	chr1	2064819	2064820	C1orf86	199990	74351	CGI	FALSE	TRUE	FALSE
cg23845507	chr1	91966731	91966732	CDC7	8317	326	CGI	TRUE	TRUE	FALSE
cg23886974	chr1	173793508	173793509	CENPL	91687	267	CGI	TRUE	FALSE	FALSE
cg23926367	chr1	19574023	19574024	EMC1	23065	4021	CGI-N-Shelf	FALSE	TRUE	FALSE
cg23959366	chr1	204654587	204654588	LRRN2	10446	8	CGI	TRUE	TRUE	FALSE
cg23996123	chr1	59369444	59369445	LOC100131060	100131060	118620	CGI	FALSE	FALSE	TRUE
cg23996302	chr1	201140803	201140804	TMEM9	252839	-100	CGI-S-Shore	TRUE	FALSE	FALSE
cg24034429	chr1	26361657	26361658	SLC30A2	7780	10945	CGI-N-Shore	FALSE	TRUE	FALSE
cg24077080	chr1	37980043	37980044	MEAF6	64769	319	CGI	TRUE	TRUE	FALSE
cg24254517	chr1	212208526	212208527	DTL	51514	-391	CGI	TRUE	TRUE	FALSE
cg24311947	chr1	28286409	28286410	XKR8	55113	-93	CGI	TRUE	FALSE	FALSE
cg24312719	chr1	93251184	93251185	EVI5	7813	6775	CGI-S-Shore	FALSE	TRUE	FALSE
cg24357276	chr1	114472822	114472823	HIPK1	204851	825	CGI	TRUE	TRUE	FALSE
cg24404823	chr1	247496053	247496054	ZNF496	84838	-1007	CGI	TRUE	FALSE	FALSE
cg24425531	chr1	15372951	15372952	TMEM51-AS1	200197	106007	CGI-N-Shelf	FALSE	TRUE	FALSE
cg24444188	chr1	200992385	200992386	KIF21B	23046	441	CGI	TRUE	TRUE	FALSE
cg24455365	chr1	20961229	20961230	PINK1	65018	1280	CGI-S-Shore	FALSE	TRUE	FALSE
cg24500456	chr1	19923405	19923406	C1orf151-NBL1	100532736	-64	CGI	TRUE	FALSE	FALSE
cg24506149	chr1	39339048	39339049	MYCBP	26292	0	CGI	TRUE	TRUE	FALSE
cg24547755	chr1	150980980	150980981	PRUNE	58497	6	CGI	TRUE	FALSE	FALSE
cg24629122	chr1	149889330	149889331	SV2A	9900	102	Non-CGI	TRUE	FALSE	FALSE
cg24670453	chr1	156211892	156211893	BGLAP	632	-57	CGI-N-Shelf	TRUE	TRUE	FALSE
cg24682307	chr1	12227131	12227132	TNFRSF1B	7133	70	CGI	TRUE	FALSE	FALSE
cg24693287	chr1	31885850	31885851	SERINC2	347735	3437	CGI	TRUE	TRUE	FALSE
cg24854095	chr1	90286294	90286295	LRRC8D	55144	-277	CGI	TRUE	FALSE	FALSE
cg25018357	chr1	26490989	26490990	ZNF593	51042	-5397	CGI	FALSE	FALSE	TRUE
cg25140345	chr1	2440291	2440292	PANK4	55229	17742	CGI	FALSE	TRUE	FALSE
cg25140945	chr1	3816479	3816480	C1orf174	339448	376	CGI-N-Shore	TRUE	TRUE	FALSE
cg25208724	chr1	156163844	156163845	SLC25A44	9673	113	CGI	TRUE	FALSE	FALSE
cg25272655	chr1	228644958	228644959	HIST3H2A	92815	600	CGI	TRUE	FALSE	FALSE
cg25284512	chr1	55180710	55180711	TTC4	7268	-783	CGI-N-Shore	TRUE	TRUE	FALSE
cg25367431	chr1	2846836	2846837	ACTRT2	140625	-91208	CGI-S-Shore	FALSE	FALSE	TRUE
cg25367926	chr1	201196047	201196048	IGFN1	91156	36093	Non-CGI	FALSE	TRUE	FALSE
cg25382472	chr1	47779932	47779933	STIL	6491	-112	CGI	TRUE	FALSE	FALSE
cg25389462	chr1	241803298	241803299	OPN3	23596	401	CGI	TRUE	FALSE	FALSE
cg25611840	chr1	93913821	93913822	FNBP1L	54874	132	CGI	TRUE	FALSE	FALSE
cg25683325	chr1	158151058	158151059	CD1D	912	1320	CGI	FALSE	TRUE	FALSE
cg25742246	chr1	214153460	214153461	PROX1	5629	-7824	CGI	FALSE	FALSE	TRUE
cg25774098	chr1	161359705	161359706	C1orf192	257177	-22040	CGI	FALSE	FALSE	TRUE
cg26000554	chr1	220921614	220921615	MARC2	54996	-60	CGI	TRUE	FALSE	FALSE
cg26145502	chr1	8939074	8939075	ENO1	2023	75	CGI	TRUE	TRUE	FALSE
cg26148135	chr1	229479087	229479088	CCSAP	126731	-398	CGI	TRUE	FALSE	FALSE
cg26224305	chr1	934197	934198	HES4	57801	1353	CGI	FALSE	FALSE	TRUE
cg26550851	chr1	3701203	3701204	SMIM1	388588	11850	CGI	FALSE	TRUE	FALSE
cg26879777	chr1	155145220	155145221	TRIM46	80128	-199	CGI-N-Shore	TRUE	TRUE	FALSE
cg26883190	chr1	53914086	53914087	SLC25A3P1	163742	-8392	Non-CGI	FALSE	FALSE	TRUE
cg26899490	chr1	27114329	27114330	PIGV	55650	-123	CGI	TRUE	FALSE	FALSE
cg27165836	chr1	4193882	4193883	LOC728716	728716	193209	CGI-S-Shore	FALSE	FALSE	TRUE
cg27167184	chr1	171750545	171750546	METTL13	51603	-214	CGI	TRUE	FALSE	FALSE
cg27428660	chr1	54519174	54519175	TMEM59	9528	-62	CGI	TRUE	FALSE	FALSE
cg27527108	chr1	116711075	116711076	MAB21L3	126868	56698	CGI	FALSE	FALSE	TRUE
cg27547954	chr1	76081962	76081963	SLC44A5	204962	61646	CGI	TRUE	TRUE	FALSE
cg00001594	chr2	11484705	11484706	ROCK2	9475	4	CGI	TRUE	FALSE	FALSE
cg00049868	chr2	11245407	11245408	FLJ33534	285150	26938	CGI	FALSE	TRUE	FALSE
cg00092287	chr2	152146295	152146296	NMI	9111	133	CGI	TRUE	FALSE	FALSE
cg00160002	chr2	237032579	237032580	GBX2	2637	44071	CGI-N-Shore	FALSE	TRUE	FALSE
cg00261781	chr2	20212517	20212518	MATN3	4148	-61	CGI	TRUE	FALSE	FALSE
cg00455450	chr2	176045970	176045971	ATP5G3	518	518	CGI	FALSE	TRUE	FALSE
cg00594547	chr2	26257789	26257790	RAB10	10890	1059	CGI	FALSE	TRUE	FALSE
cg00707610	chr2	197036400	197036401	STK17B	9262	4825	CGI	TRUE	TRUE	FALSE
cg00713953	chr2	220462525	220462526	STK11IP	114790	-69	CGI	TRUE	FALSE	FALSE
cg00792783	chr2	198669748	198669749	PLCL1	5334	321	CGI	TRUE	FALSE	FALSE
cg00915609	chr2	97174045	97174046	NEURL3	93082	-198	CGI	TRUE	FALSE	FALSE
cg01101903	chr2	240322401	240322402	HDAC4	9759	943	CGI	TRUE	TRUE	FALSE
cg01129751	chr2	42796040	42796041	MTA3	57504	74330	CGI	FALSE	TRUE	FALSE
cg01276616	chr2	42396713	42396714	EML4	27436	222	CGI	TRUE	FALSE	FALSE
cg01400477	chr2	170218258	170218259	LRP2	4036	862	CGI	FALSE	TRUE	FALSE
cg01656856	chr2	170551263	170551264	PHOSPHO2-KLHL23	100526832	298	CGI	TRUE	TRUE	FALSE
cg01751470	chr2	85980788	85980789	ATOH8	84913	-119	CGI	TRUE	FALSE	FALSE
cg01925962	chr2	27193339	27193340	MAPRE3	22924	-184	CGI	TRUE	FALSE	FALSE
cg02058731	chr2	232791766	232791767	NPPC	4880	-727	CGI	TRUE	FALSE	FALSE
cg02281514	chr2	216946545	216946546	PECR	55825	-5	CGI	TRUE	FALSE	FALSE
cg02290684	chr2	239009246	239009247	ESPNL	339768	294	CGI	TRUE	FALSE	FALSE
cg02348634	chr2	47596430	47596431	EPCAM	4072	142	CGI	TRUE	FALSE	FALSE
cg02592214	chr2	128284498	128284499	IWS1	55677	-410	CGI	TRUE	FALSE	FALSE
cg02622866	chr2	176032527	176032528	MIR933	100126350	-89	CGI	TRUE	TRUE	FALSE
cg03037033	chr2	86668736	86668737	KDM3A	55818	464	CGI	TRUE	TRUE	FALSE
cg03128421	chr2	55647401	55647402	CCDC88A	55704	-343	CGI-S-Shore	TRUE	FALSE	FALSE
cg03249947	chr2	112896151	112896152	FBLN7	129804	188	CGI	TRUE	FALSE	FALSE
cg03327733	chr2	73114863	73114864	SPR	6697	350	CGI	TRUE	FALSE	FALSE
cg03328041	chr2	131850497	131850498	FAM168B	130074	505	CGI	FALSE	TRUE	FALSE
cg03371404	chr2	241525653	241525654	CAPN10	11132	-478	CGI	TRUE	FALSE	FALSE
cg03445574	chr2	198299961	198299962	SF3B1	23451	-189	CGI	TRUE	FALSE	FALSE
cg03469482	chr2	196933575	196933576	DNAH7	56171	-38	CGI	TRUE	FALSE	FALSE
cg03599729	chr2	200820225	200820226	C2orf47	79568	184	CGI	TRUE	TRUE	FALSE
cg03716672	chr2	143465045	143465046	KYNU	8942	-170148	Non-CGI	FALSE	FALSE	TRUE
cg03717555	chr2	72372167	72372168	CYP26B1	56603	2794	CGI	TRUE	TRUE	FALSE
cg03780430	chr2	11886637	11886638	LPIN1	23175	68915	CGI	TRUE	TRUE	FALSE
cg04066396	chr2	159314911	159314912	PKP4	8502	1434	CGI	TRUE	TRUE	FALSE
cg04306050	chr2	176046468	176046469	ATP5G3	518	20	CGI	TRUE	FALSE	FALSE
cg04460285	chr2	113522412	113522413	CKAP2L	150468	-157	CGI	TRUE	FALSE	FALSE
cg04576568	chr2	220377822	220377823	ASIC4	55515	-1068	CGI-N-Shore	TRUE	FALSE	FALSE
cg04609126	chr2	20646520	20646521	RHOB	388	-313	CGI	TRUE	FALSE	FALSE
cg04652957	chr2	54785375	54785376	RPL23AP32	56969	29015	CGI-S-Shore	TRUE	TRUE	FALSE
cg04750100	chr2	136595281	136595282	LCT	3938	-530	Non-CGI	TRUE	FALSE	FALSE
cg05570707	chr2	24270316	24270317	C2orf44	80304	-19	CGI	TRUE	FALSE	FALSE
cg05658887	chr2	8833616	8833617	ID2	3398	11502	CGI	FALSE	FALSE	TRUE
cg05684773	chr2	242089732	242089733	PASK	23178	-337	CGI	TRUE	TRUE	FALSE
cg05861971	chr2	101436479	101436480	NPAS2	4862	-132	CGI	TRUE	FALSE	FALSE
cg05882878	chr2	37458821	37458822	NDUFAF7	55471	46	CGI	TRUE	FALSE	FALSE
cg05930133	chr2	66661280	66661281	MEIS1	4211	-1250	CGI	TRUE	FALSE	FALSE
cg05932184	chr2	582544	582545	TMEM18	129787	94893	CGI	FALSE	FALSE	TRUE
cg06023570	chr2	7058545	7058546	RNF144A-AS1	386597	266	CGI-S-Shore	TRUE	TRUE	FALSE
cg06161235	chr2	109065510	109065511	GCC2	9648	-65	CGI	TRUE	FALSE	FALSE
cg06165982	chr2	240499816	240499817	HDAC4	9759	-176469	Non-CGI	TRUE	FALSE	FALSE
cg06218228	chr2	238875540	238875541	UBE2F-SCLY	100533179	-45	CGI	TRUE	FALSE	FALSE
cg06232512	chr2	240612347	240612348	LOC150935	150935	-72205	CGI-N-Shore	FALSE	FALSE	TRUE
cg06233293	chr2	47596185	47596186	EPCAM	4072	-100	CGI-N-Shore	TRUE	FALSE	FALSE
cg06492144	chr2	31806352	31806353	SRD5A2	6716	-311	CGI	TRUE	FALSE	FALSE
cg06679003	chr2	38152283	38152284	RMDN2	151393	-177	CGI	TRUE	FALSE	FALSE
cg06820907	chr2	242122206	242122207	ANO7	50636	-5716	CGI	FALSE	TRUE	FALSE
cg06869899	chr2	28113326	28113327	RBKS	64080	-102	CGI	TRUE	FALSE	FALSE
cg06905692	chr2	30144376	30144377	ALK	238	99	CGI	TRUE	FALSE	FALSE
cg07263979	chr2	241585888	241585889	AQP12B	653437	36433	CGI-N-Shore	FALSE	FALSE	TRUE
cg07419021	chr2	162274436	162274437	TBR1	10716	1815	CGI	TRUE	TRUE	FALSE
cg07466807	chr2	173326947	173326948	ITGA6	3655	34864	Non-CGI	FALSE	TRUE	FALSE
cg07568517	chr2	3381687	3381688	TSSC1	7260	-33	CGI	TRUE	FALSE	FALSE
cg07652213	chr2	48010362	48010363	MSH6	2956	140	CGI	TRUE	FALSE	FALSE
cg07834408	chr2	234355294	234355295	DGKD	8527	92140	CGI-N-Shore	FALSE	TRUE	FALSE
cg07871302	chr2	29470049	29470050	CLIP4	79745	149477	Non-CGI	FALSE	TRUE	FALSE
cg07960067	chr2	9144629	9144630	MBOAT2	129642	-752	CGI	TRUE	FALSE	FALSE
cg08081869	chr2	24582653	24582654	ITSN2	50618	742	CGI	FALSE	TRUE	FALSE
cg08209388	chr2	242212472	242212473	2002-09-01	4735	-42249	CGI	TRUE	TRUE	FALSE
cg08217163	chr2	66809959	66809960	MEIS1	4211	147426	CGI	FALSE	FALSE	TRUE
cg08325821	chr2	91670297	91670298	LOC654342	654342	177676	CGI	FALSE	FALSE	TRUE
cg08343042	chr2	135476907	135476908	TMEM163	81615	48425	CGI	TRUE	TRUE	FALSE
cg08356102	chr2	240099720	240099721	MGC16025	85009	17431	CGI	TRUE	TRUE	FALSE
cg08802203	chr2	233415465	233415466	EIF4E2	9470	107	CGI	TRUE	TRUE	FALSE
cg08879546	chr2	131113730	131113731	PTPN18	26469	149	CGI	TRUE	FALSE	FALSE
cg09286061	chr2	68290165	68290166	C1D	10438	-5	CGI	TRUE	FALSE	FALSE
cg09462924	chr2	66666470	66666471	MEIS1	4211	3937	CGI	TRUE	TRUE	FALSE
cg09496791	chr2	95787596	95787597	MRPS5	64969	156	CGI	TRUE	FALSE	FALSE
cg10038720	chr2	179397008	179397009	TTN-AS1	100506866	9453	CGI-S-Shore	FALSE	TRUE	FALSE
cg10125865	chr2	170683981	170683982	UBR3	130507	-35	CGI	TRUE	FALSE	FALSE
cg10416105	chr2	111435850	111435851	BUB1	699	-165	CGI	TRUE	FALSE	FALSE
cg10537847	chr2	99953749	99953750	EIF5B	9669	-83	CGI	TRUE	TRUE	FALSE
cg10629682	chr2	27486061	27486062	SLC30A3	7781	12125	CGI	TRUE	TRUE	FALSE
cg10773587	chr2	69614142	69614143	GFPT1	2673	242	CGI	FALSE	TRUE	FALSE
cg10990312	chr2	85108373	85108374	TRABD2A	129293	-120	CGI	TRUE	FALSE	FALSE
cg11027325	chr2	239148674	239148675	HES6	55502	5	CGI	TRUE	FALSE	FALSE
cg11059561	chr2	3428786	3428787	TRAPPC12	51112	45339	CGI	FALSE	TRUE	FALSE
cg11065506	chr2	224903393	224903394	SERPINE2	5270	641	CGI	TRUE	TRUE	FALSE
cg11255154	chr2	191879104	191879105	STAT1	6772	-127	CGI	TRUE	FALSE	FALSE
cg11549132	chr2	99061257	99061258	INPP4A	3631	-62	CGI	TRUE	FALSE	FALSE
cg11702456	chr2	231280907	231280908	SP100	6672	35	Non-CGI	TRUE	FALSE	FALSE
cg11948456	chr2	179278332	179278333	MIR548N	100302152	31526	CGI-N-Shore	TRUE	TRUE	FALSE
cg12309703	chr2	218621258	218621259	DIRC3	729582	56	CGI	TRUE	FALSE	FALSE
cg12346749	chr2	10443639	10443640	HPCAL1	3241	598	CGI	TRUE	TRUE	FALSE
cg12411876	chr2	131116574	131116575	PTPN18	26469	2993	CGI-S-Shelf	FALSE	TRUE	FALSE
cg12433473	chr2	220406756	220406757	TMEM198	130612	-1627	CGI	TRUE	TRUE	FALSE
cg12477533	chr2	98703450	98703451	VWA3B	200403	-143	CGI	TRUE	FALSE	FALSE
cg12644696	chr2	197458104	197458105	HECW2	57520	-768	CGI	TRUE	FALSE	FALSE
cg12795225	chr2	27852085	27852086	CCDC121	79635	-186	CGI	TRUE	TRUE	FALSE
cg12802413	chr2	234752291	234752292	HJURP	55355	10919	CGI	FALSE	TRUE	FALSE
cg12909337	chr2	218899613	218899614	RUFY4	285180	-42	CGI-S-Shore	TRUE	FALSE	FALSE
cg12968172	chr2	239112248	239112249	ILKAP	80895	74	CGI	TRUE	FALSE	FALSE
cg13006424	chr2	98377939	98377940	ZAP70	7535	47907	CGI	TRUE	TRUE	FALSE
cg13136716	chr2	42275153	42275154	PKDCC	91461	-6	CGI	TRUE	FALSE	FALSE
cg13223806	chr2	60784449	60784450	BCL11A	53335	-3815	CGI	FALSE	FALSE	TRUE
cg13225420	chr2	97303412	97303413	KANSL3	55683	701	CGI	TRUE	TRUE	FALSE
cg13303737	chr2	99758037	99758038	C2orf15	150590	-146	CGI	TRUE	TRUE	FALSE
cg13465838	chr2	103235720	103235721	SLC9A2	6549	-444	CGI	TRUE	FALSE	FALSE
cg13579957	chr2	62132778	62132779	COMMD1	150684	-23	CGI-N-Shore	TRUE	FALSE	FALSE
cg13585492	chr2	3187884	3187885	TSSC1	7260	193767	CGI-S-Shelf	FALSE	FALSE	TRUE
cg13703087	chr2	128848975	128848976	UGGT1	56886	220	CGI	TRUE	TRUE	FALSE
cg13749494	chr2	105489649	105489650	POU3F3	5455	17679	CGI	TRUE	FALSE	FALSE
cg13810556	chr2	217363253	217363254	RPL37A	6168	-265	CGI-N-Shore	TRUE	FALSE	FALSE
cg13890435	chr2	73460655	73460656	PRADC1	84279	-298	CGI	TRUE	FALSE	FALSE
cg13954965	chr2	133175192	133175193	GPR39	2863	1044	CGI	TRUE	FALSE	FALSE
cg14062745	chr2	65357211	65357212	RAB1A	5861	222	CGI	TRUE	FALSE	FALSE
cg14102272	chr2	201729414	201729415	CLK1	1195	51	CGI	TRUE	FALSE	FALSE
cg14331404	chr2	97482184	97482185	CNNM3	26505	192	CGI	TRUE	FALSE	FALSE
cg14387532	chr2	232571819	232571820	PTMA	5757	-1414	CGI	TRUE	FALSE	FALSE
cg14399369	chr2	58273683	58273684	VRK2	7444	138896	CGI	TRUE	TRUE	FALSE
cg14465080	chr2	10549521	10549522	SNORA80B	100302743	37452	Non-CGI	FALSE	TRUE	FALSE
cg14487680	chr2	3381855	3381856	TSSC1	7260	-201	CGI	TRUE	FALSE	FALSE
cg14796127	chr2	173600385	173600386	RAPGEF4	11069	-138	CGI	TRUE	TRUE	FALSE
cg14957430	chr2	64995219	64995220	SERTAD2	9792	-114172	CGI	FALSE	FALSE	TRUE
cg14972967	chr2	241374723	241374724	GPC1	2817	-390	CGI	TRUE	FALSE	FALSE
cg15146906	chr2	45838581	45838582	SRBD1	55133	-147	CGI-S-Shore	TRUE	FALSE	FALSE
cg15376007	chr2	240323239	240323240	HDAC4	9759	105	CGI	TRUE	FALSE	FALSE
cg15546232	chr2	99771159	99771160	TSGA10	80705	26	CGI	TRUE	TRUE	FALSE
cg15553848	chr2	39664346	39664347	MAP4K3	8491	-126	CGI	TRUE	TRUE	FALSE
cg15558969	chr2	748534	748535	TMEM18	129787	-71094	CGI-N-Shore	FALSE	FALSE	TRUE
cg15695852	chr2	43864466	43864467	PLEKHH2	130271	26	CGI	TRUE	FALSE	FALSE
cg15717656	chr2	74709666	74709667	TTC31	64427	-532	CGI	TRUE	FALSE	FALSE
cg16139239	chr2	32288444	32288445	SPAST	6683	-234	CGI	TRUE	FALSE	FALSE
cg16257518	chr2	203776997	203776998	ALS2CR8	79800	18	CGI	TRUE	FALSE	FALSE
cg16442452	chr2	7739760	7739761	LOC100506274	100506274	178367	CGI-N-Shore	FALSE	FALSE	TRUE
cg16724175	chr2	129660605	129660606	HS6ST1	9394	-584433	CGI-S-Shore	FALSE	FALSE	TRUE
cg16795290	chr2	219433115	219433116	USP37	57695	-30	CGI	TRUE	FALSE	FALSE
cg16883282	chr2	87035278	87035279	CD8A	925	239	CGI	TRUE	TRUE	FALSE
cg16937778	chr2	219858247	219858248	CRYBA2	1412	-119	CGI	TRUE	FALSE	FALSE
cg17028834	chr2	162164769	162164770	PSMD14	10213	-15	CGI	TRUE	FALSE	FALSE
cg17141599	chr2	71123688	71123689	VAX2	25806	-4030	CGI	FALSE	FALSE	TRUE
cg17144508	chr2	128283727	128283728	IWS1	55677	358	CGI	FALSE	TRUE	FALSE
cg17149980	chr2	97426598	97426599	CNNM4	26504	-39	CGI	TRUE	FALSE	FALSE
cg17169699	chr2	139537544	139537545	NXPH2	11249	265	CGI	FALSE	TRUE	FALSE
cg17187595	chr2	1878990	1878991	PXDN	7837	-130698	CGI-N-Shore	FALSE	TRUE	FALSE
cg17358307	chr2	235951453	235951454	SH3BP4	23677	90824	CGI	FALSE	TRUE	FALSE
cg17386250	chr2	241957517	241957518	SNED1	25992	19261	CGI-S-Shelf	FALSE	TRUE	FALSE
cg17529832	chr2	105461096	105461097	LOC100506421	100506421	6836	CGI	FALSE	TRUE	FALSE
cg17749468	chr2	202316740	202316741	STRADB	55437	347	CGI	TRUE	TRUE	FALSE
cg17782715	chr2	241228795	241228796	GPC1	2817	-146318	CGI-N-Shore	FALSE	FALSE	TRUE
cg17918270	chr2	1983484	1983485	PXDN	7837	-235192	CGI	FALSE	TRUE	FALSE
cg17963935	chr2	11484593	11484594	ROCK2	9475	116	CGI	TRUE	FALSE	FALSE
cg18120278	chr2	128848689	128848690	UGGT1	56886	-63	CGI	TRUE	FALSE	FALSE
cg18429434	chr2	203499731	203499732	FAM117B	150864	-168	CGI	TRUE	FALSE	FALSE
cg18455731	chr2	3215537	3215538	TSSC1	7260	166114	CGI-S-Shore	FALSE	TRUE	FALSE
cg18863077	chr2	264731	264732	SH3YL1	26751	77	CGI	TRUE	TRUE	FALSE
cg18949409	chr2	197036502	197036503	STK17B	9262	4723	CGI	TRUE	TRUE	FALSE
cg19023585	chr2	236868124	236868125	GBX2	2637	208526	CGI	FALSE	TRUE	FALSE
cg19084174	chr2	26101348	26101349	ASXL2	55252	-35	CGI	TRUE	FALSE	FALSE
cg19326622	chr2	73511683	73511684	EGR4	1961	9144	CGI	TRUE	FALSE	FALSE
cg19447973	chr2	36825273	36825274	FEZ2	9637	57	CGI	TRUE	FALSE	FALSE
cg19566038	chr2	128615962	128615963	POLR2D	5433	-232	CGI	TRUE	FALSE	FALSE
cg19617395	chr2	232651134	232651135	COPS7B	64708	4688	CGI	TRUE	TRUE	FALSE
cg19671395	chr2	240259915	240259916	MIR2467	100616360	13582	CGI-S-Shore	FALSE	TRUE	FALSE
cg19736490	chr2	220330746	220330747	SPEG	10290	31045	CGI	FALSE	TRUE	FALSE
cg19756097	chr2	99797439	99797440	MITD1	129531	51	CGI	TRUE	TRUE	FALSE
cg19924719	chr2	10920066	10920067	PDIA6	10130	58035	CGI-S-Shelf	FALSE	TRUE	FALSE
cg20189808	chr2	242756029	242756030	NEU4	129807	5868	CGI	FALSE	TRUE	FALSE
cg20303879	chr2	201729069	201729070	CLK1	1195	396	CGI	TRUE	TRUE	FALSE
cg20536041	chr2	45029004	45029005	SIX3	6496	-140031	CGI	FALSE	FALSE	TRUE
cg20595046	chr2	29093178	29093179	TRMT61B	55006	-2	CGI	TRUE	FALSE	FALSE
cg20679309	chr2	238969453	238969454	SCLY	51540	-110	CGI	TRUE	TRUE	FALSE
cg20691720	chr2	42989971	42989972	OXER1	165140	1428	CGI-N-Shore	TRUE	FALSE	FALSE
cg20801500	chr2	220462218	220462219	STK11IP	114790	-376	CGI	TRUE	FALSE	FALSE
cg20872630	chr2	239023538	239023539	ESPNL	339768	14586	CGI	FALSE	TRUE	FALSE
cg21405109	chr2	48010105	48010106	MSH6	2956	-114	CGI	TRUE	FALSE	FALSE
cg21531689	chr2	220253653	220253654	DNPEP	23549	11074	CGI-S-Shore	TRUE	TRUE	FALSE
cg21532323	chr2	157292804	157292805	GPD2	2820	838	CGI	TRUE	TRUE	FALSE
cg21570130	chr2	178128687	178128688	MIR3128	100422824	-7948	CGI	TRUE	TRUE	FALSE
cg21624407	chr2	32853023	32853024	TTC27	55622	-62	CGI	TRUE	FALSE	FALSE
cg21656520	chr2	210867290	210867291	RPE	6120	-60	CGI	TRUE	FALSE	FALSE
cg22028161	chr2	95658954	95658955	MAL	4118	-32523	CGI	FALSE	FALSE	TRUE
cg22052672	chr2	74663416	74663417	RTKN	6242	5642	CGI	FALSE	TRUE	FALSE
cg22076123	chr2	170282921	170282922	KLHL41	10324	-53083	CGI	FALSE	FALSE	TRUE
cg22109000	chr2	69664724	69664725	NFU1	27247	34	CGI	TRUE	FALSE	FALSE
cg22197434	chr2	60781217	60781218	BCL11A	53335	-583	CGI	TRUE	FALSE	FALSE
cg22331108	chr2	232478452	232478453	C2orf57	165100	20876	CGI	FALSE	FALSE	TRUE
cg22374586	chr2	232220566	232220567	MIR4777	100616317	-6851	Non-CGI	FALSE	TRUE	FALSE
cg22411710	chr2	98280854	98280855	ACTR1B	10120	-292	CGI	TRUE	FALSE	FALSE
cg22470850	chr2	26395824	26395825	GAREML	150946	-134	CGI	TRUE	FALSE	FALSE
cg22593554	chr2	128990739	128990740	HS6ST1	9394	85430	CGI	FALSE	FALSE	TRUE
cg22732812	chr2	27717801	27717802	FNDC4	64838	323	CGI	TRUE	FALSE	FALSE
cg22944632	chr2	63277684	63277685	OTX1	5013	491	CGI	TRUE	TRUE	FALSE
cg23012552	chr2	196522377	196522378	SLC39A10	57181	844	CGI	FALSE	TRUE	FALSE
cg23041619	chr2	27435357	27435358	SLC5A6	8884	-181	CGI	TRUE	TRUE	FALSE
cg23201549	chr2	43454852	43454853	LOC100129726	100129726	501	CGI	TRUE	FALSE	FALSE
cg23227555	chr2	3523215	3523216	ADI1	55256	133	CGI	TRUE	FALSE	FALSE
cg23340613	chr2	37311651	37311652	GPATCH11	253635	56	CGI	TRUE	FALSE	FALSE
cg23393521	chr2	171571097	171571098	LOC440925	440925	-19	CGI	TRUE	FALSE	FALSE
cg23468897	chr2	178937598	178937599	PDE11A	50940	35466	CGI	TRUE	TRUE	FALSE
cg23475109	chr2	97530683	97530684	SEMA4C	54910	5050	CGI-S-Shelf	TRUE	TRUE	FALSE
cg23587288	chr2	27483067	27483068	SLC30A3	7781	15119	CGI-N-Shore	TRUE	TRUE	FALSE
cg24539668	chr2	47499521	47499522	C2orf61	285051	-95780	CGI	FALSE	TRUE	FALSE
cg24703390	chr2	222438965	222438966	EPHA4	2043	-1954	CGI	TRUE	FALSE	FALSE
cg24757850	chr2	241477887	241477888	DUSP28	285193	-21582	CGI	FALSE	TRUE	FALSE
cg24886176	chr2	70142158	70142159	MXD1	4084	-13	CGI	TRUE	FALSE	FALSE
cg24935135	chr2	62900312	62900313	EHBP1	23301	-672	Non-CGI	TRUE	FALSE	FALSE
cg24987806	chr2	209130885	209130886	PIKFYVE	200576	-104	CGI	TRUE	FALSE	FALSE
cg25098707	chr2	220042932	220042933	FAM134A	79137	-5	CGI	TRUE	FALSE	FALSE
cg25101500	chr2	42588340	42588341	COX7A2L	9167	7808	CGI	TRUE	TRUE	FALSE
cg25102919	chr2	128615792	128615793	POLR2D	5433	-62	CGI	TRUE	FALSE	FALSE
cg25240468	chr2	62115958	62115959	CCT4	10575	-166	CGI	TRUE	FALSE	FALSE
cg25250853	chr2	85822726	85822727	RNF181	51255	-109	CGI	TRUE	FALSE	FALSE
cg25301406	chr2	230578708	230578709	DNER	92737	576	CGI	FALSE	TRUE	FALSE
cg25332377	chr2	219906256	219906257	CCDC108	255101	-10	CGI	TRUE	FALSE	FALSE
cg25353287	chr2	42277667	42277668	PKDCC	91461	2505	CGI-S-Shore	FALSE	TRUE	FALSE
cg25423732	chr2	218837974	218837975	TNS1	7145	29742	Non-CGI	FALSE	TRUE	FALSE
cg25492097	chr2	220495954	220495955	SLC4A3	6508	3661	CGI-S-Shelf	TRUE	TRUE	FALSE
cg25810938	chr2	241497060	241497061	DUSP28	285193	-2409	CGI	FALSE	TRUE	FALSE
cg25828259	chr2	47918397	47918398	MSH6	2956	-91822	CGI	FALSE	FALSE	TRUE
cg25840208	chr2	31457043	31457044	EHD3	30845	162	CGI	TRUE	FALSE	FALSE
cg26084700	chr2	231693479	231693480	ITM2C	81618	-36140	CGI	FALSE	FALSE	TRUE
cg26117622	chr2	242042254	242042255	MTERFD2	130916	-506	CGI-S-Shore	TRUE	FALSE	FALSE
cg26161045	chr2	55277080	55277081	RTN4	57142	652	CGI	TRUE	FALSE	FALSE
cg26230390	chr2	203130314	203130315	NOP58	51602	-199	CGI-N-Shore	TRUE	FALSE	FALSE
cg26360792	chr2	43019997	43019998	HAAO	23498	-245	CGI	TRUE	FALSE	FALSE
cg26381592	chr2	190649278	190649279	ORMDL1	94101	-180	CGI	TRUE	FALSE	FALSE
cg26447968	chr2	74682200	74682201	INO80B-WBP1	100532735	49	CGI	TRUE	FALSE	FALSE
cg26537478	chr2	66668012	66668013	MEIS1	4211	5479	CGI	FALSE	TRUE	FALSE
cg26670245	chr2	170551352	170551353	PHOSPHO2-KLHL23	100526832	387	CGI-S-Shore	TRUE	TRUE	FALSE
cg26837570	chr2	74710667	74710668	CCDC142	84865	-309	CGI-S-Shore	TRUE	TRUE	FALSE
cg26879788	chr2	238330297	238330298	COL6A3	1293	-7446	Non-CGI	FALSE	FALSE	TRUE
cg26913798	chr2	240091029	240091030	MGC16025	85009	26122	CGI	FALSE	TRUE	FALSE
cg27256565	chr2	33952488	33952489	MYADML	151325	794	CGI	TRUE	FALSE	FALSE
cg27310163	chr2	113342241	113342242	CHCHD5	84269	204	CGI	FALSE	TRUE	FALSE
cg27361397	chr2	97426627	97426628	CNNM4	26504	-10	CGI	TRUE	FALSE	FALSE
cg27404023	chr2	162283994	162283995	TBR1	10716	11373	CGI	FALSE	FALSE	TRUE
cg27476576	chr2	121103029	121103030	INHBB	3625	-688	CGI	TRUE	FALSE	FALSE
cg00025647	chr3	147077127	147077128	ZIC4	84107	47467	CGI-S-Shore	FALSE	FALSE	TRUE
cg00031303	chr3	195681400	195681401	SDHAP1	255812	35748	CGI	FALSE	FALSE	TRUE
cg00097940	chr3	197476561	197476562	KIAA0226	9711	5	CGI	TRUE	TRUE	FALSE
cg00225902	chr3	66444122	66444123	LRIG1	26018	106721	Non-CGI	FALSE	TRUE	FALSE
cg00376019	chr3	52931306	52931307	TMEM110-MUSTN1	100526772	289	CGI	TRUE	TRUE	FALSE
cg00386925	chr3	71380367	71380368	MIR1284	100302112	210871	CGI-N-Shore	FALSE	TRUE	FALSE
cg00501421	chr3	58291814	58291815	RPP14	11102	-156	CGI-N-Shore	TRUE	FALSE	FALSE
cg00504134	chr3	152552530	152552531	P2RY1	5028	-204	CGI	TRUE	FALSE	FALSE
cg00757731	chr3	66024991	66024992	MAGI1	9223	-481	CGI	TRUE	FALSE	FALSE
cg00836482	chr3	119528956	119528957	NR1I2	8856	29624	CGI	TRUE	TRUE	FALSE
cg01106040	chr3	126194903	126194904	ZXDC	79364	-140	CGI	TRUE	FALSE	FALSE
cg01143375	chr3	191670642	191670643	PYDC2	152138	491689	CGI	FALSE	FALSE	TRUE
cg01228352	chr3	150329615	150329616	SELT	51714	8548	CGI	FALSE	TRUE	FALSE
cg01448194	chr3	20049624	20049625	PP2D1	151649	4139	Non-CGI	FALSE	TRUE	FALSE
cg01635475	chr3	167813467	167813468	GOLIM4	27333	-49	CGI	TRUE	FALSE	FALSE
cg01829450	chr3	135914745	135914746	MSL2	55167	-56	CGI	TRUE	FALSE	FALSE
cg01895333	chr3	109035405	109035406	DPPA2	151871	-40	Non-CGI	TRUE	FALSE	FALSE
cg01901898	chr3	113465629	113465630	ATP6V1A	523	-235	CGI	TRUE	FALSE	FALSE
cg01915044	chr3	196045222	196045223	TCTEX1D2	255758	-56	CGI	TRUE	TRUE	FALSE
cg01945562	chr3	145879277	145879278	PLOD2	5352	3	CGI	TRUE	FALSE	FALSE
cg01946530	chr3	173116046	173116047	NLGN1	22871	-196	CGI	TRUE	FALSE	FALSE
cg01954930	chr3	94656939	94656940	LOC255025	255025	-166	CGI	TRUE	FALSE	FALSE
cg02510164	chr3	183146421	183146422	MCF2L2	23101	-565	CGI	TRUE	FALSE	FALSE
cg02636222	chr3	48956935	48956936	ARIH2OS	646450	-116	CGI	TRUE	TRUE	FALSE
cg02692441	chr3	71179703	71179704	MIR1284	100302112	411535	Non-CGI	TRUE	TRUE	FALSE
cg02716516	chr3	45838074	45838075	SLC6A20	54716	-38	CGI	TRUE	FALSE	FALSE
cg02836020	chr3	183145946	183145947	MCF2L2	23101	-90	CGI	TRUE	FALSE	FALSE
cg02904838	chr3	187871519	187871520	LPP	4026	-142	CGI	TRUE	FALSE	FALSE
cg03037622	chr3	51430415	51430416	RBM15B	29890	1715	CGI	TRUE	FALSE	FALSE
cg03060546	chr3	49711283	49711284	APEH	327	-150	CGI	TRUE	FALSE	FALSE
cg03387092	chr3	123493248	123493249	MYLK	4638	109899	Non-CGI	FALSE	TRUE	FALSE
cg03477080	chr3	46448920	46448921	CCRL2	9034	198	Non-CGI	TRUE	FALSE	FALSE
cg03522824	chr3	119187686	119187687	POGLUT1	56983	-97	CGI-N-Shore	TRUE	FALSE	FALSE
cg03826463	chr3	186211670	186211671	LOC253573	253573	-219	CGI	TRUE	FALSE	FALSE
cg03851645	chr3	38071166	38071167	PLCD1	5333	-11	CGI	TRUE	FALSE	FALSE
cg04062383	chr3	179370420	179370421	USP13	8975	-511	CGI	TRUE	FALSE	FALSE
cg04226394	chr3	63898734	63898735	ATXN7	6314	48500	CGI	FALSE	TRUE	FALSE
cg04244215	chr3	66551541	66551542	LRIG1	26018	-695	CGI	TRUE	FALSE	FALSE
cg04408595	chr3	71802608	71802609	GPR27	2850	-591	CGI	TRUE	TRUE	FALSE
cg04424605	chr3	149939210	149939211	TSC22D2	9819	-187576	CGI	FALSE	FALSE	TRUE
cg04837898	chr3	45731254	45731255	SACM1L	22908	499	CGI	TRUE	TRUE	FALSE
cg04843801	chr3	42642061	42642062	NKTR	4820	-84	CGI	TRUE	TRUE	FALSE
cg05711928	chr3	132136352	132136353	DNAJC13	23317	-199	CGI	TRUE	FALSE	FALSE
cg05789005	chr3	196696511	196696512	PIGZ	80235	-806	CGI	TRUE	FALSE	FALSE
cg05888082	chr3	108308525	108308526	KIAA1524	57650	-33	CGI	TRUE	FALSE	FALSE
cg06212498	chr3	49045151	49045152	WDR6	11180	513	CGI	FALSE	TRUE	FALSE
cg06348477	chr3	119217354	119217355	TIMMDC1	51300	-12	CGI	TRUE	FALSE	FALSE
cg06667416	chr3	186501294	186501295	EIF4A2	1974	-65	CGI	TRUE	FALSE	FALSE
cg07101782	chr3	37034495	37034496	EPM2AIP1	9852	298	CGI	TRUE	FALSE	FALSE
cg07131136	chr3	15417170	15417171	SH3BP5	9467	-34268	Non-CGI	FALSE	FALSE	TRUE
cg07155478	chr3	197283151	197283152	BDH1	622	17041	CGI-S-Shore	TRUE	TRUE	FALSE
cg07303187	chr3	126194934	126194935	ZXDC	79364	-171	CGI	TRUE	FALSE	FALSE
cg07413251	chr3	27771667	27771668	EOMES	8320	-7460	CGI	FALSE	FALSE	TRUE
cg07588141	chr3	105588208	105588209	CBLB	868	56	CGI	TRUE	FALSE	FALSE
cg07731455	chr3	14220336	14220337	LSM3	27258	107	CGI	TRUE	FALSE	FALSE
cg07805724	chr3	69062774	69062775	EOGT	285203	0	CGI	TRUE	FALSE	FALSE
cg08093226	chr3	48754594	48754595	IP6K2	51447	324	CGI	TRUE	FALSE	FALSE
cg08175029	chr3	23848512	23848513	UBE2E1	7324	1127	CGI	FALSE	TRUE	FALSE
cg08219531	chr3	72495966	72495967	RYBP	23429	-191	CGI	TRUE	FALSE	FALSE
cg08688006	chr3	39222345	39222346	XIRP1	165904	11738	CGI	FALSE	FALSE	TRUE
cg08806444	chr3	5163989	5163990	ARL8B	55207	58	CGI	TRUE	FALSE	FALSE
cg08830818	chr3	122514143	122514144	DIRC2	84925	241	CGI	TRUE	FALSE	FALSE
cg08858437	chr3	142838938	142838939	CHST2	9435	319	CGI	TRUE	FALSE	FALSE
cg08929133	chr3	186330026	186330027	AHSG	197	-822	Non-CGI	TRUE	FALSE	FALSE
cg08980237	chr3	156534860	156534861	LOC730091	730091	-8	CGI	TRUE	FALSE	FALSE
cg09008417	chr3	42814854	42814855	CCDC13	152206	-108	CGI	TRUE	FALSE	FALSE
cg09331640	chr3	150264376	150264377	EIF2A	83939	-196	CGI	TRUE	TRUE	FALSE
cg09459719	chr3	141594525	141594526	ATP1B3	483	-943	CGI	TRUE	FALSE	FALSE
cg09717471	chr3	175338908	175338909	MIR4789	100616395	251578	CGI	FALSE	TRUE	FALSE
cg10132987	chr3	171757307	171757308	FNDC3B	64778	-109	CGI	TRUE	FALSE	FALSE
cg10523996	chr3	126423120	126423121	CHCHD6	84303	1	CGI	TRUE	FALSE	FALSE
cg10681256	chr3	47324572	47324573	KIF9	64147	-234	CGI	TRUE	FALSE	FALSE
cg10683958	chr3	9885602	9885603	RPUSD3	285367	98	CGI	TRUE	TRUE	FALSE
cg10943458	chr3	120627085	120627086	STXBP5L	9515	34	CGI	TRUE	FALSE	FALSE
cg11094012	chr3	100428140	100428141	TFG	10342	5	CGI	TRUE	FALSE	FALSE
cg11143158	chr3	113557646	113557647	GRAMD1C	54762	10616	CGI	TRUE	TRUE	FALSE
cg11605617	chr3	32612461	32612462	DYNC1LI1	51143	-94	CGI	TRUE	FALSE	FALSE
cg11843799	chr3	50297388	50297389	SEMA3B	7869	-7650	CGI-N-Shore	TRUE	FALSE	FALSE
cg12105765	chr3	183947332	183947333	VWA5B2	90113	-983	CGI	TRUE	FALSE	FALSE
cg12177207	chr3	159943101	159943102	C3orf80	401097	-320	CGI	TRUE	FALSE	FALSE
cg12430824	chr3	128145533	128145534	DNAJB8-AS1	285224	-36902	CGI	FALSE	FALSE	TRUE
cg12786945	chr3	13324760	13324761	NUP210	23225	137047	CGI	FALSE	FALSE	TRUE
cg12903374	chr3	15643321	15643322	BTD	686	180	CGI	TRUE	TRUE	FALSE
cg13334304	chr3	23631338	23631339	UBE2E1	7324	-216044	Non-CGI	FALSE	TRUE	FALSE
cg13422008	chr3	111697794	111697795	ABHD10	55347	-32	CGI	TRUE	FALSE	FALSE
cg13512580	chr3	127309512	127309513	TPRA1	131601	54	CGI	TRUE	FALSE	FALSE
cg13680844	chr3	52255405	52255406	TLR9	54106	9840	CGI	FALSE	TRUE	FALSE
cg13803214	chr3	150804490	150804491	MED12L	116931	1038	CGI	TRUE	TRUE	FALSE
cg14216142	chr3	138313050	138313051	CEP70	80321	77	CGI	TRUE	FALSE	FALSE
cg14671526	chr3	37035200	37035201	MLH1	4292	358	CGI	TRUE	TRUE	FALSE
cg14877820	chr3	16306698	16306699	OXNAD1	92106	30	CGI	TRUE	FALSE	FALSE
cg14981232	chr3	128997662	128997663	C3orf37	56941	-20	CGI	TRUE	FALSE	FALSE
cg15159420	chr3	195545327	195545328	MUC4	4585	-6482	CGI	FALSE	FALSE	TRUE
cg15175194	chr3	113775337	113775338	KIAA1407	57577	121	CGI	TRUE	FALSE	FALSE
cg15730967	chr3	12856795	12856796	CAND2	23066	18623	CGI	FALSE	TRUE	FALSE
cg15965542	chr3	10547373	10547374	MIR885	100126334	-111126	CGI	TRUE	TRUE	FALSE
cg16204700	chr3	133292376	133292377	CDV3	55573	-56	CGI	TRUE	FALSE	FALSE
cg16216311	chr3	50305083	50305084	SEMA3B	7869	42	Non-CGI	TRUE	FALSE	FALSE
cg16305746	chr3	197236368	197236369	BDH1	622	63824	CGI-N-Shore	FALSE	FALSE	TRUE
cg16374319	chr3	37876385	37876386	CTDSPL	10217	-27282	Non-CGI	FALSE	TRUE	FALSE
cg16618282	chr3	47018402	47018403	CCDC12	151903	-131	CGI	TRUE	FALSE	FALSE
cg17171325	chr3	10052813	10052814	LOC401052	401052	-33	CGI	TRUE	TRUE	FALSE
cg17215036	chr3	48129188	48129189	MAP4	4134	1579	CGI-N-Shore	FALSE	TRUE	FALSE
cg17281763	chr3	48594394	48594395	PFKFB4	5210	4166	CGI	TRUE	TRUE	FALSE
cg17572056	chr3	195947062	195947063	SLC51A	200931	3678	CGI	FALSE	TRUE	FALSE
cg17631972	chr3	134032303	134032304	AMOTL2	51421	61954	CGI	FALSE	FALSE	TRUE
cg17663253	chr3	195622522	195622523	TNK2	10188	16292	CGI	TRUE	TRUE	FALSE
cg17815252	chr3	142838682	142838683	CHST2	9435	63	CGI	TRUE	FALSE	FALSE
cg18060685	chr3	50329850	50329851	IFRD2	7866	497	CGI	TRUE	TRUE	FALSE
cg18255614	chr3	130745685	130745686	NEK11	79858	-7	CGI	TRUE	FALSE	FALSE
cg18301348	chr3	193855884	193855885	HES1	3280	1952	CGI	FALSE	TRUE	FALSE
cg18340446	chr3	53916291	53916292	ACTR8	93973	-61	CGI	TRUE	FALSE	FALSE
cg18683143	chr3	184429764	184429765	MAGEF1	64110	70	CGI	TRUE	FALSE	FALSE
cg19049316	chr3	61237063	61237064	FHIT	2272	68	CGI	TRUE	FALSE	FALSE
cg19112357	chr3	13834712	13834713	WNT7A	7476	86904	CGI-N-Shore	FALSE	FALSE	TRUE
cg19260500	chr3	133969278	133969279	RYK	6259	306	CGI	FALSE	TRUE	FALSE
cg19447156	chr3	50541195	50541196	CACNA2D2	9254	-302	CGI	TRUE	FALSE	FALSE
cg19526908	chr3	49058333	49058334	DALRD3	55152	132	CGI	TRUE	TRUE	FALSE
cg19831962	chr3	46719834	46719835	ALS2CL	259173	15358	Non-CGI	TRUE	TRUE	FALSE
cg19862838	chr3	101396008	101396009	ZBTB11	27107	-19	CGI	TRUE	FALSE	FALSE
cg19930721	chr3	47554419	47554420	ELP6	54859	778	CGI	FALSE	TRUE	FALSE
cg19952228	chr3	122102923	122102924	FAM162A	26355	-98	CGI	TRUE	FALSE	FALSE
cg20080006	chr3	149376040	149376041	WWTR1-AS1	100128025	42	CGI	TRUE	TRUE	FALSE
cg20089095	chr3	185303988	185303989	SENP2	59343	3480	CGI	TRUE	TRUE	FALSE
cg20168479	chr3	32443031	32443032	CMTM7	112616	9867	CGI	FALSE	TRUE	FALSE
cg20391883	chr3	71834706	71834707	PROK2	60675	-348	CGI	TRUE	FALSE	FALSE
cg20693607	chr3	184319566	184319567	EPHB3	2049	39978	CGI	FALSE	FALSE	TRUE
cg20786557	chr3	167452770	167452771	PDCD10	11235	-118	CGI	TRUE	FALSE	FALSE
cg20835807	chr3	197026013	197026014	DLG1	1739	128	CGI	TRUE	TRUE	FALSE
cg20885179	chr3	38035831	38035832	VILL	50853	6300	CGI	TRUE	TRUE	FALSE
cg20970111	chr3	195934604	195934605	ZDHHC19	131540	3694	CGI	FALSE	TRUE	FALSE
cg21140054	chr3	42632404	42632405	SS18L2	51188	105	CGI	TRUE	TRUE	FALSE
cg21222826	chr3	69062762	69062763	EOGT	285203	10	CGI	TRUE	FALSE	FALSE
cg21303011	chr3	24537177	24537178	THRB	7068	-723	CGI	TRUE	FALSE	FALSE
cg21612339	chr3	49761620	49761621	GMPPB	29925	-235	CGI	TRUE	FALSE	FALSE
cg21655307	chr3	141030761	141030762	ZBTB38	253461	-12292	CGI	FALSE	FALSE	TRUE
cg21789849	chr3	107809536	107809537	CD47	961	397	CGI	FALSE	TRUE	FALSE
cg21792155	chr3	46940347	46940348	PTH1R	5745	21110	CGI	FALSE	TRUE	FALSE
cg21838625	chr3	10378056	10378057	SEC13	6396	-15197	CGI	TRUE	TRUE	FALSE
cg21908638	chr3	101497982	101497983	NXPE3	91775	-45	CGI	TRUE	FALSE	FALSE
cg22156255	chr3	149939241	149939242	TSC22D2	9819	-187545	CGI	FALSE	FALSE	TRUE
cg22621867	chr3	51990301	51990302	GPR62	118442	970	CGI	TRUE	FALSE	FALSE
cg22841359	chr3	127842733	127842734	EEFSEC	60678	-29578	CGI	TRUE	TRUE	FALSE
cg23192683	chr3	194208907	194208908	FLJ34208	401106	1037	CGI-S-Shore	FALSE	TRUE	FALSE
cg23208152	chr3	50383134	50383135	ZMYND10	51364	20	CGI	TRUE	FALSE	FALSE
cg23479905	chr3	49059487	49059488	DALRD3	55152	-1019	CGI	TRUE	TRUE	FALSE
cg23492215	chr3	107941502	107941503	IFT57	55081	-84	CGI-S-Shore	TRUE	FALSE	FALSE
cg23506350	chr3	125094322	125094323	ZNF148	7707	-123	CGI	TRUE	FALSE	FALSE
cg23719848	chr3	110790763	110790764	PVRL3	25945	156	CGI	TRUE	FALSE	FALSE
cg24050613	chr3	186648279	186648280	ST6GAL1	6480	-34	CGI	TRUE	FALSE	FALSE
cg24159247	chr3	4575483	4575484	ITPR1	3708	40450	Non-CGI	FALSE	TRUE	FALSE
cg24625136	chr3	138658554	138658555	FOXL2	668	7426	CGI	FALSE	TRUE	FALSE
cg24695608	chr3	185986721	185986722	DGKG	1608	93300	CGI	FALSE	TRUE	FALSE
cg24822001	chr3	43732329	43732330	ABHD5	51099	-44	CGI	TRUE	FALSE	FALSE
cg24923700	chr3	142315220	142315221	PLS1	5357	-7	CGI	TRUE	FALSE	FALSE
cg25092247	chr3	15140607	15140608	ZFYVE20	64145	46	CGI	TRUE	FALSE	FALSE
cg25132161	chr3	179370779	179370780	USP13	8975	-152	CGI	TRUE	FALSE	FALSE
cg25151919	chr3	44754333	44754334	ZNF502	91392	197	CGI	FALSE	TRUE	FALSE
cg25234159	chr3	184870893	184870894	C3orf70	285382	-90	CGI	TRUE	FALSE	FALSE
cg25444231	chr3	193852935	193852936	HES1	3280	-994	CGI	TRUE	FALSE	FALSE
cg25466588	chr3	23958904	23958905	RPL15	6138	608	CGI	TRUE	TRUE	FALSE
cg25574812	chr3	44770954	44770955	ZNF501	115560	-168	CGI-N-Shore	TRUE	FALSE	FALSE
cg25604819	chr3	82857026	82857027	GBE1	2632	-1046075	CGI-N-Shore	FALSE	FALSE	TRUE
cg25628243	chr3	196295415	196295416	WDR53	348793	-1	CGI	TRUE	FALSE	FALSE
cg26094646	chr3	15247472	15247473	COL6A4P1	344875	-5	CGI-N-Shore	TRUE	FALSE	FALSE
cg26384201	chr3	50336345	50336346	NAT6	24142	552	CGI-N-Shore	TRUE	TRUE	FALSE
cg26389914	chr3	4805500	4805501	EGOT	100126791	-12225	CGI	FALSE	TRUE	FALSE
cg26398261	chr3	19188463	19188464	KCNH8	131096	-1552	CGI	TRUE	FALSE	FALSE
cg26403284	chr3	122512611	122512612	HSPBAP1	79663	53	CGI	TRUE	FALSE	FALSE
cg26464889	chr3	13692169	13692170	LINC00620	285375	-50	CGI	TRUE	FALSE	FALSE
cg26792116	chr3	168865089	168865090	MECOM	2122	516472	CGI	TRUE	TRUE	FALSE
cg26857078	chr3	129034995	129034996	H1FX-AS1	339942	-117	CGI	TRUE	FALSE	FALSE
cg27323154	chr3	150421424	150421425	FAM194A	131831	316	CGI	TRUE	TRUE	FALSE
cg27504195	chr3	113342400	113342401	MIR4446	100616476	28676	CGI-N-Shore	FALSE	TRUE	FALSE
cg27505273	chr3	137483543	137483544	SOX14	8403	408	CGI	TRUE	FALSE	FALSE
cg00224911	chr4	74486142	74486143	RASSF6	166824	196	Non-CGI	TRUE	TRUE	FALSE
cg00322942	chr4	84377076	84377077	MRPS18C	51023	-40	CGI	TRUE	FALSE	FALSE
cg00646883	chr4	73935602	73935603	COX18	285521	-129	CGI	TRUE	FALSE	FALSE
cg00809888	chr4	76862425	76862426	NAAA	27163	-258	CGI	TRUE	FALSE	FALSE
cg00810208	chr4	997012	997013	FGFRL1	53834	-7926	CGI	FALSE	TRUE	FALSE
cg01122304	chr4	2845576	2845577	ADD1	118	-6	CGI	TRUE	FALSE	FALSE
cg01156816	chr4	132984152	132984153	PCDH10	57575	-1086316	CGI	FALSE	FALSE	TRUE
cg01398529	chr4	26322459	26322460	RBPJ	3516	1126	CGI	TRUE	TRUE	FALSE
cg01464969	chr4	1768943	1768944	FGFR3	2261	-26094	CGI	FALSE	FALSE	TRUE
cg01856849	chr4	169931464	169931465	CBR4	84869	2	CGI	TRUE	FALSE	FALSE
cg02005549	chr4	106629965	106629966	GSTCD	79807	23	CGI	TRUE	FALSE	FALSE
cg02187816	chr4	140005074	140005075	ELF2	1998	55575	CGI	FALSE	TRUE	FALSE
cg02464357	chr4	89444989	89444990	PIGY	84992	-33	CGI	TRUE	FALSE	FALSE
cg02528979	chr4	83812705	83812706	THAP9	79725	-9130	CGI	TRUE	TRUE	FALSE
cg02929209	chr4	53588595	53588596	SNORA26	677810	9178	CGI	FALSE	FALSE	TRUE
cg03162143	chr4	762159	762160	LOC100129917	100129917	13475	CGI	TRUE	TRUE	FALSE
cg03191889	chr4	75858262	75858263	PARM1	25849	-21	CGI	TRUE	FALSE	FALSE
cg03372076	chr4	171964403	171964404	LOC100506122	100506122	2649	CGI	FALSE	TRUE	FALSE
cg03447013	chr4	31577307	31577308	PCDH7	5099	855276	Non-CGI	FALSE	FALSE	TRUE
cg03461399	chr4	71858891	71858892	DCK	1633	-372	CGI-N-Shore	TRUE	FALSE	FALSE
cg03768017	chr4	185747375	185747376	ACSL1	2180	-159	CGI	TRUE	FALSE	FALSE
cg03855256	chr4	142142274	142142275	ZNF330	27309	224	CGI	FALSE	TRUE	FALSE
cg03905758	chr4	174451468	174451469	HAND2	9464	-89	CGI	TRUE	FALSE	FALSE
cg04477404	chr4	161403211	161403212	RAPGEF2	9693	1214212	CGI	FALSE	FALSE	TRUE
cg04686953	chr4	1107512	1107513	RNF212	285498	-159	CGI	TRUE	FALSE	FALSE
cg04737207	chr4	140222858	140222859	NAA15	80155	181	CGI	TRUE	TRUE	FALSE
cg04765098	chr4	184644154	184644155	TRAPPC11	60684	63733	CGI	FALSE	FALSE	TRUE
cg04796973	chr4	25314218	25314219	ZCCHC4	29063	-176	CGI-N-Shore	TRUE	FALSE	FALSE
cg04899896	chr4	79860379	79860380	PAQR3	152559	201	CGI	TRUE	FALSE	FALSE
cg05210937	chr4	185655043	185655044	MLF1IP	79682	241	CGI	FALSE	TRUE	FALSE
cg05264454	chr4	120549840	120549841	PDE5A	8654	139	CGI	TRUE	FALSE	FALSE
cg05795596	chr4	154170783	154170784	ANXA2P1	303	59178	CGI	FALSE	TRUE	FALSE
cg06041156	chr4	110651191	110651192	PLA2G12A	81579	49	CGI	TRUE	FALSE	FALSE
cg06545139	chr4	926475	926476	TMEM175	84286	212	CGI	TRUE	TRUE	FALSE
cg06789048	chr4	3416881	3416882	HGFAC	3083	-26843	CGI	FALSE	TRUE	FALSE
cg06965122	chr4	174089515	174089516	GALNT7	51809	-387	CGI-N-Shore	TRUE	TRUE	FALSE
cg07097374	chr4	100573536	100573537	MTTP	4547	88295	CGI	TRUE	FALSE	FALSE
cg07409418	chr4	174429649	174429650	HAND2	9464	21727	CGI	FALSE	FALSE	TRUE
cg07474108	chr4	79697329	79697330	BMP2K	55589	-201	CGI	TRUE	FALSE	FALSE
cg07595404	chr4	130014885	130014886	C4orf33	132321	55	CGI	TRUE	FALSE	FALSE
cg07725967	chr4	7663352	7663353	AFAP1-AS1	84740	-92463	CGI-N-Shelf	FALSE	TRUE	FALSE
cg07767534	chr4	84031145	84031146	PLAC8	51316	4764	CGI	TRUE	TRUE	FALSE
cg07828340	chr4	882639	882640	GAK	2580	43533	CGI	FALSE	TRUE	FALSE
cg08071405	chr4	3446405	3446406	HGFAC	3083	2678	CGI	FALSE	TRUE	FALSE
cg08292519	chr4	117374476	117374477	MIR1973	100302290	153594	Non-CGI	FALSE	FALSE	TRUE
cg08644841	chr4	187065955	187065956	FAM149A	25854	739	CGI	TRUE	TRUE	FALSE
cg09020341	chr4	71704808	71704809	GRSF1	2926	817	CGI	FALSE	TRUE	FALSE
cg09278283	chr4	36376970	36376971	DTHD1	401124	93725	CGI	FALSE	FALSE	TRUE
cg09511237	chr4	140477492	140477493	SETD7	80854	83	CGI	TRUE	FALSE	FALSE
cg09983370	chr4	42658444	42658445	ATP8A1	10396	676	CGI	FALSE	TRUE	FALSE
cg10202508	chr4	166034152	166034153	TMEM192	201931	-127	CGI	TRUE	FALSE	FALSE
cg10325536	chr4	3512392	3512393	LRPAP1	4043	21830	CGI-S-Shore	FALSE	TRUE	FALSE
cg10519766	chr4	4291809	4291810	LYAR	55646	85	CGI	TRUE	FALSE	FALSE
cg10756475	chr4	1757242	1757243	TACC3	10460	34024	Non-CGI	FALSE	FALSE	TRUE
cg10828676	chr4	147443721	147443722	SLC10A7	84068	-597	CGI	TRUE	FALSE	FALSE
cg10871779	chr4	113437909	113437910	NEUROG2	63973	-580	CGI	TRUE	FALSE	FALSE
cg11186122	chr4	174255494	174255495	HMGB2	3148	99	CGI	TRUE	FALSE	FALSE
cg11497952	chr4	185940969	185940970	HELT	391723	973	CGI	FALSE	TRUE	FALSE
cg11553618	chr4	185905046	185905047	HELT	391723	-34947	CGI-N-Shore	FALSE	FALSE	TRUE
cg11856821	chr4	187540609	187540610	MTNR1A	4543	-64071	CGI	FALSE	TRUE	FALSE
cg12524748	chr4	1713366	1713367	SLBP	7884	703	CGI	FALSE	TRUE	FALSE
cg12746059	chr4	134070389	134070390	PCDH10	57575	-79	CGI	TRUE	FALSE	FALSE
cg12836011	chr4	166795260	166795261	TLL1	7092	849	CGI-S-Shore	FALSE	TRUE	FALSE
cg12959887	chr4	4543699	4543700	STX18	53407	74	CGI	TRUE	FALSE	FALSE
cg13078134	chr4	165109478	165109479	ANP32C	23520	9383	CGI	FALSE	TRUE	FALSE
cg13294780	chr4	140005756	140005757	ELF2	1998	54893	CGI	TRUE	TRUE	FALSE
cg13677120	chr4	52709175	52709176	DCUN1D4	23142	-99	CGI	TRUE	FALSE	FALSE
cg13773914	chr4	122872367	122872368	TRPC3	7222	540	CGI	FALSE	TRUE	FALSE
cg13784466	chr4	187527305	187527306	MTNR1A	4543	-50767	CGI-S-Shelf	FALSE	TRUE	FALSE
cg14029686	chr4	2765767	2765768	TNIP2	79155	-7663	CGI	FALSE	FALSE	TRUE
cg14308286	chr4	22780491	22780492	GBA3	57733	85942	CGI	FALSE	TRUE	FALSE
cg14502728	chr4	78978537	78978538	FRAS1	80144	-185	CGI	TRUE	FALSE	FALSE
cg14686113	chr4	54965829	54965830	GSX2	170825	-417	CGI-N-Shore	TRUE	TRUE	FALSE
cg14718741	chr4	189140097	189140098	TRIML1	339976	79498	CGI	FALSE	FALSE	TRUE
cg14746841	chr4	7604322	7604323	MIR4274	100422826	142566	CGI	FALSE	TRUE	FALSE
cg14839371	chr4	2831238	2831239	ADD1	118	-14344	CGI-N-Shore	FALSE	TRUE	FALSE
cg15463803	chr4	113436765	113436766	NEUROG2	63973	561	CGI	TRUE	TRUE	FALSE
cg15614628	chr4	74124464	74124465	ANKRD17	26057	36	CGI	TRUE	FALSE	FALSE
cg15846316	chr4	57371719	57371720	ARL9	132946	343	CGI	FALSE	TRUE	FALSE
cg15957017	chr4	71571214	71571215	RUFY3	22902	559	CGI	FALSE	TRUE	FALSE
cg16152424	chr4	78978848	78978849	FRAS1	80144	123	CGI	TRUE	FALSE	FALSE
cg16170181	chr4	144258448	144258449	GAB1	2549	464	CGI	FALSE	TRUE	FALSE
cg16785698	chr4	186456103	186456104	PDLIM3	27295	607	CGI	FALSE	TRUE	FALSE
cg17226811	chr4	146654277	146654278	C4orf51	646603	52920	CGI	FALSE	FALSE	TRUE
cg17290159	chr4	57843785	57843786	NOA1	84273	39	CGI	TRUE	FALSE	FALSE
cg17397955	chr4	56915347	56915348	CEP135	9662	100309	CGI	FALSE	FALSE	TRUE
cg17483361	chr4	54243829	54243830	PDGFRA	5156	8	CGI	TRUE	FALSE	FALSE
cg17485021	chr4	13530094	13530095	LOC285547	285547	2945	CGI	FALSE	TRUE	FALSE
cg17563034	chr4	5021268	5021269	CYTL1	54360	-70	CGI-S-Shore	TRUE	FALSE	FALSE
cg17666096	chr4	141294787	141294788	LOC100129858	100129858	-240	CGI	TRUE	TRUE	FALSE
cg17839008	chr4	17783042	17783043	FAM184B	27146	91	CGI	TRUE	FALSE	FALSE
cg18078087	chr4	15005463	15005464	CPEB2	132864	1164	CGI	TRUE	FALSE	FALSE
cg18089134	chr4	130014711	130014712	SCLT1	132320	51	CGI	TRUE	FALSE	FALSE
cg18330675	chr4	180980172	180980173	LINC00290	728081	1100128	CGI	FALSE	FALSE	TRUE
cg18589016	chr4	85419557	85419558	NKX6-1	4825	-169	CGI	TRUE	FALSE	FALSE
cg18608389	chr4	52917561	52917562	SPATA18	132671	-30	CGI	TRUE	FALSE	FALSE
cg18675616	chr4	1962842	1962843	SCARNA22	677770	-13519	Non-CGI	FALSE	TRUE	FALSE
cg18795809	chr4	10458531	10458532	ZNF518B	85460	499	CGI	FALSE	TRUE	FALSE
cg19034890	chr4	8373516	8373517	TRMT44	152992	-67086	CGI	FALSE	TRUE	FALSE
cg19090637	chr4	111119052	111119053	ELOVL6	79071	766	CGI	FALSE	TRUE	FALSE
cg19671926	chr4	122722719	122722720	EXOSC9	5393	246	CGI	TRUE	TRUE	FALSE
cg20000718	chr4	41869433	41869434	TMEM33	55161	-67702	CGI	FALSE	FALSE	TRUE
cg20277282	chr4	8230053	8230054	SH3TC1	54436	28992	CGI	TRUE	TRUE	FALSE
cg20460797	chr4	4387917	4387918	NSG1	27065	38047	CGI	TRUE	TRUE	FALSE
cg20774475	chr4	108641752	108641753	PAPSS1	9061	-332	CGI	TRUE	FALSE	FALSE
cg21042627	chr4	183193100	183193101	MIR1305	100302270	102653	Non-CGI	FALSE	TRUE	FALSE
cg21080506	chr4	467474	467475	ABCA11P	79963	522	CGI	FALSE	TRUE	FALSE
cg21330094	chr4	8418132	8418133	TRMT44	152992	-22470	CGI	FALSE	TRUE	FALSE
cg21996239	chr4	186427765	186427766	PDLIM3	27295	28945	Non-CGI	FALSE	TRUE	FALSE
cg22031336	chr4	89079809	89079810	ABCG2	9429	72663	CGI	TRUE	TRUE	FALSE
cg22213235	chr4	748946	748947	LOC100129917	100129917	26688	CGI	FALSE	TRUE	FALSE
cg22388850	chr4	48782544	48782545	FRYL	285527	-227	CGI	TRUE	FALSE	FALSE
cg22466171	chr4	99850251	99850252	EIF4E	1977	1533	CGI	TRUE	FALSE	FALSE
cg22649740	chr4	83351600	83351601	ENOPH1	58478	-124	CGI	TRUE	FALSE	FALSE
cg22798201	chr4	46995637	46995638	GABRA4	2557	785	CGI	TRUE	FALSE	FALSE
cg23570618	chr4	153898109	153898110	FHDC1	85462	33973	CGI-S-Shore	FALSE	TRUE	FALSE
cg23653712	chr4	52904379	52904380	SGCB	6443	104	CGI	FALSE	TRUE	FALSE
cg23884076	chr4	76945449	76945450	CXCL10	3627	-759	Non-CGI	TRUE	TRUE	FALSE
cg24557470	chr4	1341371	1341372	UVSSA	57654	266	CGI	TRUE	FALSE	FALSE
cg24588528	chr4	3027957	3027958	HTT-AS1	100750326	48282	CGI	FALSE	TRUE	FALSE
cg24611427	chr4	140099304	140099305	ELF2	1998	-38652	CGI	FALSE	FALSE	TRUE
cg24689061	chr4	7483577	7483578	MIR4274	100422826	21821	CGI-N-Shore	FALSE	TRUE	FALSE
cg24789447	chr4	148402574	148402575	EDNRA	1909	504	CGI	FALSE	TRUE	FALSE
cg24917627	chr4	48271835	48271836	TEC	7006	-20	CGI	TRUE	FALSE	FALSE
cg25097308	chr4	8594549	8594550	CPZ	8532	12331	CGI	TRUE	TRUE	FALSE
cg25148771	chr4	2936127	2936128	MFSD10	10227	457	CGI	TRUE	TRUE	FALSE
cg25157709	chr4	15004626	15004627	CPEB2	132864	327	CGI	TRUE	FALSE	FALSE
cg25185173	chr4	154712580	154712581	SFRP2	6423	-2351	CGI	FALSE	FALSE	TRUE
cg25261181	chr4	3255128	3255129	MSANTD1	345222	4360	CGI	FALSE	TRUE	FALSE
cg25664381	chr4	4577473	4577474	LOC100507266	100507266	33614	CGI-S-Shore	FALSE	TRUE	FALSE
cg25894334	chr4	77172836	77172837	FAM47E-STBD1	100631383	-15	CGI	TRUE	TRUE	FALSE
cg26148714	chr4	52904575	52904576	SGCB	6443	-89	CGI	TRUE	FALSE	FALSE
cg26228943	chr4	47487307	47487308	ATP10D	57205	-101	CGI	TRUE	FALSE	FALSE
cg26465317	chr4	8398823	8398824	TRMT44	152992	-41779	CGI	FALSE	TRUE	FALSE
cg26757305	chr4	47487301	47487302	ATP10D	57205	-107	CGI	TRUE	FALSE	FALSE
cg26796245	chr4	113970820	113970821	MIR1243	100302188	-57197	Non-CGI	TRUE	TRUE	FALSE
cg26923863	chr4	1221838	1221839	LOC100130872	100130872	-19087	CGI-S-Shore	FALSE	TRUE	FALSE
cg27037990	chr4	184427250	184427251	ING2	3622	1029	CGI	TRUE	TRUE	FALSE
cg27297724	chr4	48781911	48781912	FRYL	285527	403	CGI	FALSE	TRUE	FALSE
cg27474733	chr4	3076259	3076260	HTT-AS1	100750326	-17	CGI	TRUE	FALSE	FALSE
cg27556913	chr4	1341059	1341060	UVSSA	57654	-43	CGI	TRUE	FALSE	FALSE
cg00319661	chr5	2632178	2632179	IRX2	153572	119589	CGI-N-Shore	FALSE	FALSE	TRUE
cg00510011	chr5	89854651	89854652	GPR98	84059	33	CGI	TRUE	FALSE	FALSE
cg00616500	chr5	176900001	176900002	DBN1	1627	691	CGI	TRUE	TRUE	FALSE
cg00624617	chr5	153852554	153852555	HAND1	9421	5268	CGI	FALSE	FALSE	TRUE
cg00643311	chr5	1924173	1924174	IRX4	50805	-41292	CGI-S-Shore	FALSE	FALSE	TRUE
cg00971676	chr5	176882057	176882058	PRR7-AS1	340037	-7111	CGI	TRUE	TRUE	FALSE
cg01141339	chr5	72530198	72530199	TMEM174	134288	61174	CGI	FALSE	FALSE	TRUE
cg01227078	chr5	110074645	110074646	SLC25A46	91137	782	CGI	TRUE	TRUE	FALSE
cg01541629	chr5	6633111	6633112	NSUN2	54888	360	CGI	TRUE	FALSE	FALSE
cg01590693	chr5	153418326	153418327	FAM114A2	10827	169	CGI	TRUE	TRUE	FALSE
cg01598250	chr5	145722855	145722856	POU4F3	5459	4267	CGI	FALSE	FALSE	TRUE
cg01678714	chr5	179780409	179780410	GFPT2	9945	-93	CGI	TRUE	FALSE	FALSE
cg01969115	chr5	663639	663640	TPPP	11076	29869	CGI-S-Shore	FALSE	TRUE	FALSE
cg01993799	chr5	177027141	177027142	B4GALT7	11285	21	CGI	TRUE	FALSE	FALSE
cg02285922	chr5	119799862	119799863	PRR16	51334	-155	CGI-N-Shore	TRUE	FALSE	FALSE
cg02337825	chr5	180480982	180480983	BTNL9	153579	13756	CGI-S-Shore	FALSE	TRUE	FALSE
cg02458910	chr5	79783286	79783287	FAM151B	167555	-512	CGI-N-Shore	TRUE	FALSE	FALSE
cg02680629	chr5	147763595	147763596	FBXO38	81545	48	CGI	TRUE	FALSE	FALSE
cg03958269	chr5	134094426	134094427	DDX46	9879	-33	CGI	TRUE	FALSE	FALSE
cg03975447	chr5	178741374	178741375	ADAMTS2	9509	31055	CGI	FALSE	TRUE	FALSE
cg04110559	chr5	176873656	176873657	PRR7	80758	-138	CGI	TRUE	TRUE	FALSE
cg04130928	chr5	176449623	176449624	ZNF346	23567	-72	CGI	TRUE	FALSE	FALSE
cg04175399	chr5	80383034	80383035	RNU5E-1	26829	-118426	CGI	FALSE	TRUE	FALSE
cg04196933	chr5	178195556	178195557	ZNF354A	6940	-37852	Non-CGI	FALSE	TRUE	FALSE
cg04727116	chr5	40679832	40679833	PTGER4	5734	-198	CGI	TRUE	FALSE	FALSE
cg05153820	chr5	149829439	149829440	RPS14	6208	-119	CGI	TRUE	FALSE	FALSE
cg05189291	chr5	157158457	157158458	THG1L	54974	133	CGI	TRUE	FALSE	FALSE
cg05252940	chr5	171881426	171881427	SH3PXD2B	285590	99	CGI	TRUE	FALSE	FALSE
cg05265988	chr5	180688748	180688749	TRIM52	84851	-628	CGI	TRUE	TRUE	FALSE
cg05560435	chr5	172671526	172671527	NKX2-5	1482	-9210	CGI	FALSE	FALSE	TRUE
cg05612977	chr5	172198876	172198877	DUSP1	1843	-672	CGI	TRUE	FALSE	FALSE
cg05859395	chr5	203595	203596	LRRC14B	389257	11968	CGI-N-Shore	FALSE	FALSE	TRUE
cg05922392	chr5	180650178	180650179	TRIM41	90933	-83	CGI	TRUE	TRUE	FALSE
cg05966809	chr5	122180794	122180795	SNX24	28966	-364	CGI	TRUE	FALSE	FALSE
cg05972654	chr5	1076843	1076844	MIR4635	100616479	-13753	CGI-S-Shore	FALSE	TRUE	FALSE
cg06434480	chr5	74632940	74632941	HMGCR	3156	785	CGI	TRUE	TRUE	FALSE
cg06686995	chr5	179228489	179228490	MIR1229	100302156	-3142	CGI	TRUE	TRUE	FALSE
cg06848689	chr5	180673203	180673204	GNB2L1	10399	-2296	CGI	FALSE	FALSE	TRUE
cg06994090	chr5	76011849	76011850	F2R	2149	-17	CGI	TRUE	FALSE	FALSE
cg07210335	chr5	109026907	109026908	MAN2A1	4124	1750	CGI	FALSE	TRUE	FALSE
cg07237214	chr5	42424604	42424605	GHR	2690	726	CGI	TRUE	TRUE	FALSE
cg07352245	chr5	179125837	179125838	CANX	821	408	CGI	TRUE	TRUE	FALSE
cg07458308	chr5	134827512	134827513	TIFAB	497189	-39422	CGI	FALSE	FALSE	TRUE
cg07626339	chr5	138630455	138630456	SNORA74A	26821	15985	CGI	FALSE	TRUE	FALSE
cg07671805	chr5	74907694	74907695	COL4A3BP	10087	-99887	CGI	FALSE	TRUE	FALSE
cg07741915	chr5	693476	693477	TPPP	11076	32	CGI	TRUE	FALSE	FALSE
cg07764676	chr5	178286881	178286882	ZNF354B	117608	-71	CGI	TRUE	FALSE	FALSE
cg07791464	chr5	174961246	174961247	SFXN1	94081	55731	CGI	FALSE	FALSE	TRUE
cg08354281	chr5	132113201	132113202	2008-09-01	23176	358	CGI	TRUE	TRUE	FALSE
cg08386084	chr5	57756505	57756506	PLK2	10769	-538	CGI	TRUE	FALSE	FALSE
cg08447589	chr5	150603302	150603303	CCDC69	26112	350	CGI	FALSE	TRUE	FALSE
cg08540929	chr5	1193937	1193938	SLC6A19	340024	-7771	CGI	FALSE	FALSE	TRUE
cg08709073	chr5	63802184	63802185	RGS7BP	401190	-266	CGI	TRUE	FALSE	FALSE
cg08891656	chr5	95067697	95067698	RHOBTB3	22836	14359	CGI	TRUE	TRUE	FALSE
cg09084391	chr5	346247	346248	AHRR	57491	41954	CGI-S-Shore	FALSE	TRUE	FALSE
cg09567642	chr5	70751435	70751436	BDP1	55814	-5	CGI	TRUE	FALSE	FALSE
cg09800012	chr5	131563605	131563606	P4HA2	8974	-48	CGI	TRUE	FALSE	FALSE
cg09809285	chr5	188949	188950	LRRC14B	389257	-2675	CGI	FALSE	TRUE	FALSE
cg09867268	chr5	956521	956522	LOC100506688	100506688	40932	CGI-S-Shore	FALSE	FALSE	TRUE
cg09901035	chr5	143163	143164	PLEKHG4B	153478	2789	CGI	FALSE	TRUE	FALSE
cg10595449	chr5	134184476	134184477	C5orf24	134553	3105	CGI-S-Shelf	FALSE	TRUE	FALSE
cg10672508	chr5	172199157	172199158	DUSP1	1843	-953	CGI	TRUE	FALSE	FALSE
cg10795659	chr5	72415998	72415999	TMEM171	134285	-388	CGI	TRUE	FALSE	FALSE
cg11100802	chr5	180688063	180688064	TRIM52	84851	54	CGI	TRUE	FALSE	FALSE
cg11257429	chr5	178016796	178016797	COL23A1	91522	758	CGI	FALSE	TRUE	FALSE
cg11258089	chr5	59189791	59189792	PART1	25859	-593747	CGI	TRUE	TRUE	FALSE
cg11825883	chr5	78907997	78907998	PAPD4	167153	-244	CGI-N-Shore	TRUE	FALSE	FALSE
cg11892243	chr5	140044482	140044483	WDR55	54853	97	CGI	TRUE	FALSE	FALSE
cg12182453	chr5	2206790	2206791	IRX4	50805	-323909	CGI-S-Shore	FALSE	FALSE	TRUE
cg12318857	chr5	140071230	140071231	HARS2	23438	211	CGI	TRUE	FALSE	FALSE
cg12539796	chr5	7850203	7850204	C5orf49	134121	1059	CGI	FALSE	TRUE	FALSE
cg12587766	chr5	38556435	38556436	MIR3650	100500824	1226	CGI	TRUE	TRUE	FALSE
cg12626968	chr5	43603169	43603170	NNT	23530	377	CGI	TRUE	TRUE	FALSE
cg12636108	chr5	176036956	176036957	GPRIN1	114787	173	CGI	FALSE	TRUE	FALSE
cg12661370	chr5	149340060	149340061	SLC26A2	1836	-238	CGI	TRUE	FALSE	FALSE
cg12938520	chr5	171881833	171881834	SH3PXD2B	285590	-305	CGI	TRUE	FALSE	FALSE
cg12964860	chr5	137514295	137514296	BRD8	10902	61	CGI	TRUE	FALSE	FALSE
cg13013671	chr5	114632084	114632085	CCDC112	153733	372	CGI	TRUE	TRUE	FALSE
cg13021278	chr5	159866414	159866415	PTTG1	9232	17548	CGI	FALSE	FALSE	TRUE
cg13570101	chr5	172661859	172661860	NKX2-5	1482	454	CGI	TRUE	FALSE	FALSE
cg13689918	chr5	177581058	177581059	NHP2	55651	-96	CGI	TRUE	FALSE	FALSE
cg13701615	chr5	271609	271610	PDCD6	10016	-125	CGI	TRUE	FALSE	FALSE
cg13707793	chr5	139045301	139045302	CXXC5	51523	16999	CGI-N-Shelf	FALSE	TRUE	FALSE
cg13711457	chr5	5494990	5494991	KIAA0947	23379	72182	CGI	FALSE	FALSE	TRUE
cg14068146	chr5	176940708	176940709	DDX41	51428	3257	CGI-N-Shelf	FALSE	TRUE	FALSE
cg14574910	chr5	2155809	2155810	IRX4	50805	-272928	CGI	FALSE	FALSE	TRUE
cg14704758	chr5	146888890	146888891	DPYSL3	1809	727	CGI	FALSE	TRUE	FALSE
cg14725924	chr5	6411956	6411957	MED10	84246	-33316	CGI	FALSE	FALSE	TRUE
cg14808378	chr5	466582	466583	PP7080	25845	6496	CGI-S-Shore	TRUE	TRUE	FALSE
cg14970666	chr5	2038989	2038990	IRX4	50805	-156108	CGI-S-Shore	FALSE	FALSE	TRUE
cg15016296	chr5	126853189	126853190	PRRC1	133619	-118	CGI-N-Shore	TRUE	FALSE	FALSE
cg15028904	chr5	140700449	140700450	TAF7	6879	-97	CGI	TRUE	FALSE	FALSE
cg15084390	chr5	475085	475086	PP7080	25845	-2004	CGI	FALSE	TRUE	FALSE
cg15100112	chr5	64331517	64331518	CWC27	10283	266761	CGI	FALSE	FALSE	TRUE
cg15407517	chr5	78280882	78280883	ARSB	411	1473	CGI	TRUE	TRUE	FALSE
cg15609272	chr5	159894868	159894869	MIR3142	100422938	-6539	CGI	TRUE	FALSE	FALSE
cg15889838	chr5	131832312	131832313	IRF1	3659	-1052	CGI	TRUE	FALSE	FALSE
cg16091952	chr5	178488100	178488101	ZNF354C	30832	492	CGI	FALSE	TRUE	FALSE
cg16234172	chr5	142149390	142149391	ARHGAP26	23092	-900	CGI	TRUE	FALSE	FALSE
cg16253537	chr5	131132836	131132837	RAPGEF6	51735	-79	CGI	TRUE	FALSE	FALSE
cg16274199	chr5	121414067	121414068	LOX	4015	-11	CGI	TRUE	FALSE	FALSE
cg16280705	chr5	110408910	110408911	TSLP	85480	3131	CGI	FALSE	TRUE	FALSE
cg16343302	chr5	10649157	10649158	ANKRD33B	651746	84721	CGI-N-Shore	FALSE	TRUE	FALSE
cg16449302	chr5	108744973	108744974	PJA2	9867	700	CGI	FALSE	TRUE	FALSE
cg16533977	chr5	101834136	101834137	SLCO6A1	133482	582	CGI-N-Shore	FALSE	TRUE	FALSE
cg16654732	chr5	170846517	170846518	FGF18	8817	-148	CGI	TRUE	FALSE	FALSE
cg16675054	chr5	171616574	171616575	STK10	6793	-1227	CGI	TRUE	FALSE	FALSE
cg16997104	chr5	1053643	1053644	MIR4635	100616479	9444	CGI	FALSE	TRUE	FALSE
cg17290488	chr5	179281560	179281561	C5orf45	51149	4278	CGI-N-Shelf	FALSE	TRUE	FALSE
cg17430818	chr5	145583220	145583221	RBM27	54439	56	CGI	TRUE	FALSE	FALSE
cg17465305	chr5	68788117	68788118	OCLN	100506658	0	CGI-N-Shore	TRUE	FALSE	FALSE
cg17477893	chr5	80597509	80597510	ZCCHC9	84240	106	CGI	TRUE	TRUE	FALSE
cg17546366	chr5	145724443	145724444	POU4F3	5459	5855	CGI	FALSE	FALSE	TRUE
cg17617527	chr5	142782415	142782416	NR3C1	2908	32660	CGI	TRUE	TRUE	FALSE
cg17671005	chr5	113391774	113391775	KCNN2	3781	-306240	CGI	FALSE	FALSE	TRUE
cg17802144	chr5	172756776	172756777	STC2	8614	-269	CGI	TRUE	FALSE	FALSE
cg17844160	chr5	53606416	53606417	ARL15	54622	-12	CGI	TRUE	FALSE	FALSE
cg18066271	chr5	100236783	100236784	ST8SIA4	7903	2202	CGI	FALSE	TRUE	FALSE
cg18175036	chr5	65892087	65892088	MAST4	375449	-87	CGI	TRUE	FALSE	FALSE
cg18247650	chr5	71616010	71616011	MRPS27	23107	72	CGI	TRUE	FALSE	FALSE
cg18363761	chr5	180650950	180650951	TRIM41	90933	686	CGI	TRUE	TRUE	FALSE
cg18530551	chr5	172670879	172670880	NKX2-5	1482	-8563	CGI	FALSE	FALSE	TRUE
cg18616062	chr5	9546347	9546348	LOC100505806	100505806	34	CGI	TRUE	FALSE	FALSE
cg18764291	chr5	122110994	122110995	SNX2	6643	243	CGI	TRUE	TRUE	FALSE
cg19091621	chr5	176296830	176296831	HK3	3101	29501	CGI	FALSE	TRUE	FALSE
cg19238398	chr5	138775248	138775249	DNAJC18	202052	-33	CGI	TRUE	FALSE	FALSE
cg19667623	chr5	149380025	149380026	HMGXB3	22993	-142	CGI	TRUE	TRUE	FALSE
cg19671565	chr5	95194609	95194610	C5orf27	202299	6672	CGI	FALSE	TRUE	FALSE
cg19697475	chr5	45696465	45696466	HCN1	348980	-244	CGI	TRUE	FALSE	FALSE
cg19739264	chr5	1344842	1344843	CLPTM1L	81037	158	CGI	TRUE	FALSE	FALSE
cg19789021	chr5	95158141	95158142	GLRX	2745	434	CGI	FALSE	TRUE	FALSE
cg20415170	chr5	95298066	95298067	ELL2	22936	-290	CGI	TRUE	FALSE	FALSE
cg20960405	chr5	176047485	176047486	MIR4281	100422962	9014	CGI	FALSE	TRUE	FALSE
cg21141143	chr5	60922694	60922695	C5orf64	285668	-10940	CGI-S-Shore	FALSE	TRUE	FALSE
cg21153026	chr5	130599493	130599494	CDC42SE2	56990	-207	CGI	TRUE	FALSE	FALSE
cg21161187	chr5	1416793	1416794	SLC6A3	6531	28748	CGI	FALSE	TRUE	FALSE
cg21606957	chr5	111753754	111753755	EPB41L4A	64097	1254	CGI-N-Shore	TRUE	TRUE	FALSE
cg21617058	chr5	57878882	57878883	RAB3C	115827	-55	CGI	TRUE	FALSE	FALSE
cg21744723	chr5	34839210	34839211	TTC23L	153657	-57	CGI	TRUE	FALSE	FALSE
cg21815550	chr5	107009036	107009037	EFNA5	1946	-2439	CGI	FALSE	FALSE	TRUE
cg21817673	chr5	141736862	141736863	SPRY4	81848	-32241	CGI	FALSE	FALSE	TRUE
cg21907156	chr5	79703652	79703653	ZFYVE16	9765	-184	CGI	TRUE	FALSE	FALSE
cg22044134	chr5	177891151	177891152	COL23A1	91522	126403	CGI	FALSE	TRUE	FALSE
cg22185633	chr5	177026993	177026994	B4GALT7	11285	-124	CGI	TRUE	FALSE	FALSE
cg22227058	chr5	159846119	159846120	SLU7	10569	47	CGI	TRUE	FALSE	FALSE
cg22424536	chr5	175792478	175792479	ARL10	285598	-22	CGI	TRUE	FALSE	FALSE
cg22562498	chr5	111095202	111095203	NREP	9315	217424	CGI-S-Shore	TRUE	TRUE	FALSE
cg22743003	chr5	81147781	81147782	SSBP2	23635	-100708	CGI	FALSE	FALSE	TRUE
cg22787311	chr5	154173503	154173504	C5orf4	10826	56708	Non-CGI	FALSE	TRUE	FALSE
cg22792660	chr5	74349644	74349645	GCNT4	51301	-22919	CGI	FALSE	FALSE	TRUE
cg23007946	chr5	172386413	172386414	RPL26L1	51121	-24	CGI	TRUE	FALSE	FALSE
cg23064601	chr5	134367394	134367395	PITX1	5307	2568	CGI	TRUE	TRUE	FALSE
cg23175023	chr5	74346730	74346731	GCNT4	51301	-20005	CGI-N-Shore	FALSE	FALSE	TRUE
cg23370466	chr5	180647841	180647842	MIR4638	100616342	1790	CGI-S-Shore	FALSE	FALSE	TRUE
cg24048372	chr5	93954560	93954561	ANKRD32	84250	168	CGI	TRUE	TRUE	FALSE
cg24064760	chr5	34839352	34839353	TTC23L	153657	82	CGI	TRUE	FALSE	FALSE
cg24159723	chr5	132387639	132387640	HSPA4	3308	-21	CGI	TRUE	FALSE	FALSE
cg24662107	chr5	139135835	139135836	PSD2	84249	-39569	CGI	FALSE	FALSE	TRUE
cg24751154	chr5	3191887	3191888	LOC285577	285577	344319	CGI-S-Shelf	FALSE	FALSE	TRUE
cg24953233	chr5	892707	892708	BRD9	65980	230	CGI	TRUE	TRUE	FALSE
cg24969605	chr5	139555269	139555270	CYSTM1	84418	615	CGI	FALSE	TRUE	FALSE
cg25070803	chr5	172483131	172483132	CREBRF	153222	-222	CGI	TRUE	FALSE	FALSE
cg25084220	chr5	126366197	126366198	MARCH3	115123	241	CGI	TRUE	FALSE	FALSE
cg25087958	chr5	34915621	34915622	BRIX1	55299	-197	CGI	TRUE	TRUE	FALSE
cg25461827	chr5	133801682	133801683	CDKN2AIPNL	91368	-54083	CGI	FALSE	FALSE	TRUE
cg25585647	chr5	76011922	76011923	F2R	2149	53	CGI	TRUE	FALSE	FALSE
cg26075213	chr5	79554534	79554535	SERINC5	256987	-2635	CGI-S-Shore	FALSE	FALSE	TRUE
cg26293310	chr5	133968572	133968573	SAR1B	51128	-38	CGI	TRUE	FALSE	FALSE
cg26665246	chr5	179105570	179105571	CBY3	646019	2403	CGI	FALSE	TRUE	FALSE
cg26734912	chr5	128430241	128430242	ISOC1	51015	-199	CGI	TRUE	FALSE	FALSE
cg26807935	chr5	139028606	139028607	CXXC5	51523	304	CGI	FALSE	TRUE	FALSE
cg26827058	chr5	132947004	132947005	FSTL4	23105	1217	CGI	FALSE	TRUE	FALSE
cg27085584	chr5	61699286	61699287	DIMT1	27292	440	CGI-N-Shore	FALSE	TRUE	FALSE
cg27636925	chr5	266909	266910	PDCD6	10016	-4825	Non-CGI	FALSE	FALSE	TRUE
cg00197993	chr6	1201056	1201057	LOC285768	285768	-99488	Non-CGI	FALSE	FALSE	TRUE
cg00356818	chr6	153324278	153324279	MTRF1L	54516	-352	CGI	TRUE	FALSE	FALSE
cg00370229	chr6	29521602	29521603	UBD	10537	6098	CGI	FALSE	FALSE	TRUE
cg00674706	chr6	29521145	29521146	UBD	10537	6555	CGI	FALSE	FALSE	TRUE
cg00678938	chr6	168378903	168378904	HGC6.3	100128124	-1283	CGI	TRUE	FALSE	FALSE
cg00696540	chr6	112194776	112194777	FYN	2534	-120	CGI	TRUE	FALSE	FALSE
cg00783730	chr6	30689216	30689217	TUBB	203068	1058	CGI	TRUE	TRUE	FALSE
cg00920970	chr6	152129388	152129389	ESR1	2099	117756	CGI	TRUE	TRUE	FALSE
cg01043019	chr6	127440510	127440511	RSPO3	84870	461	CGI	TRUE	TRUE	FALSE
cg01088070	chr6	71665395	71665396	B3GAT2	135152	1391	CGI	FALSE	TRUE	FALSE
cg01097444	chr6	33378345	33378346	PHF1	5252	-426	CGI	TRUE	FALSE	FALSE
cg01171360	chr6	293285	293286	DUSP22	56940	1183	CGI	FALSE	TRUE	FALSE
cg01177470	chr6	27870695	27870696	OR2B2	81697	9477	Non-CGI	TRUE	FALSE	FALSE
cg01553661	chr6	28186797	28186798	TOB2P1	222699	-89	CGI	TRUE	FALSE	FALSE
cg01696193	chr6	56819912	56819913	BEND6	221336	138	CGI	TRUE	FALSE	FALSE
cg01878788	chr6	33176342	33176343	RING1	6015	55	CGI	TRUE	FALSE	FALSE
cg01923549	chr6	41774024	41774025	TOMM6	100188893	19845	CGI	FALSE	TRUE	FALSE
cg01945183	chr6	31696867	31696868	DDAH2	23564	1170	CGI	TRUE	TRUE	FALSE
cg01998682	chr6	151712546	151712547	ZBTB2	57621	129	CGI	FALSE	TRUE	FALSE
cg02087565	chr6	170585664	170585665	LOC154449	154449	-14006	CGI	FALSE	FALSE	TRUE
cg02197279	chr6	157955288	157955289	MIR3692	100500899	5123	Non-CGI	FALSE	TRUE	FALSE
cg02254152	chr6	30295036	30295037	HCG18	414777	-108	CGI	TRUE	TRUE	FALSE
cg02259877	chr6	33217421	33217422	HCG25	414765	107	CGI	TRUE	FALSE	FALSE
cg02260481	chr6	133135438	133135439	RPS12	6206	-268	CGI	TRUE	FALSE	FALSE
cg02362970	chr6	136871947	136871948	MAP7	9053	8	CGI	TRUE	FALSE	FALSE
cg02397073	chr6	107349626	107349627	C6orf203	51250	218	CGI	TRUE	TRUE	FALSE
cg02558474	chr6	13487018	13487019	GFOD1	54438	849	CGI	TRUE	FALSE	FALSE
cg02808397	chr6	159656576	159656577	FNDC1	84624	66146	CGI-S-Shore	FALSE	TRUE	FALSE
cg02912326	chr6	97285743	97285744	GPR63	81491	-389	CGI	TRUE	FALSE	FALSE
cg02919564	chr6	47210376	47210377	TNFRSF21	27242	67302	Non-CGI	FALSE	TRUE	FALSE
cg03010186	chr6	32122528	32122529	LOC100507547	100507547	-385	CGI	TRUE	TRUE	FALSE
cg03026689	chr6	74363884	74363885	SLC17A5	26503	-146	CGI	TRUE	FALSE	FALSE
cg03098515	chr6	31619949	31619950	APOM	55937	-270	CGI	TRUE	TRUE	FALSE
cg03098814	chr6	24911308	24911309	FAM65B	9750	131088	CGI	TRUE	TRUE	FALSE
cg03251349	chr6	30104916	30104917	TRIM40	135644	1030	Non-CGI	TRUE	TRUE	FALSE
cg03313815	chr6	24642024	24642025	KIAA0319	9856	4357	CGI-N-Shelf	FALSE	TRUE	FALSE
cg03389717	chr6	33601269	33601270	ITPR3	3710	12112	CGI	FALSE	TRUE	FALSE
cg03434432	chr6	32122393	32122394	LOC100507547	100507547	-250	CGI	TRUE	TRUE	FALSE
cg03605661	chr6	31707750	31707751	MSH5-SAPCD1	100532732	24	CGI	TRUE	FALSE	FALSE
cg03630271	chr6	32212969	32212970	NOTCH4	4855	-21124	Non-CGI	FALSE	FALSE	TRUE
cg03704379	chr6	16761815	16761816	ATXN1	6310	-93	CGI	TRUE	FALSE	FALSE
cg03778035	chr6	32821992	32821993	PSMB9	5698	53	CGI	TRUE	FALSE	FALSE
cg03808149	chr6	10747832	10747833	SYCP2L	221711	-161	CGI	TRUE	FALSE	FALSE
cg03900386	chr6	26569090	26569091	ABT1	29777	-28079	CGI	TRUE	FALSE	FALSE
cg03947199	chr6	83903007	83903008	RWDD2A	112611	-23	CGI	TRUE	TRUE	FALSE
cg04030444	chr6	170581971	170581972	LOC154449	154449	-10313	CGI	FALSE	FALSE	TRUE
cg04062567	chr6	27861237	27861238	HIST1H2BO	8348	33	CGI-S-Shore	TRUE	FALSE	FALSE
cg04074140	chr6	75915780	75915781	COL12A1	1303	-156	CGI	TRUE	FALSE	FALSE
cg04173139	chr6	31601385	31601386	SNORA38	677820	10528	CGI-S-Shore	FALSE	TRUE	FALSE
cg04281069	chr6	144508118	144508119	STX11	8676	36463	CGI	TRUE	TRUE	FALSE
cg04295117	chr6	166858159	166858160	MPC1	51660	-61672	CGI-S-Shore	FALSE	TRUE	FALSE
cg04395977	chr6	170151835	170151836	C6orf70	55780	113	CGI	TRUE	TRUE	FALSE
cg04452437	chr6	170411595	170411596	LOC154449	154449	160060	CGI	FALSE	FALSE	TRUE
cg04459013	chr6	146056793	146056794	EPM2A	7957	327	CGI	TRUE	TRUE	FALSE
cg04530460	chr6	42858550	42858551	C6orf226	441150	2	CGI	TRUE	FALSE	FALSE
cg04628692	chr6	32094915	32094916	ATF6B	1388	1100	CGI-N-Shore	FALSE	TRUE	FALSE
cg04762615	chr6	7541788	7541789	DSP	1832	-80	CGI	TRUE	FALSE	FALSE
cg04805612	chr6	139014287	139014288	FLJ46906	441172	1481	CGI	FALSE	TRUE	FALSE
cg04940962	chr6	170102116	170102117	WDR27	253769	41	CGI	TRUE	FALSE	FALSE
cg05135670	chr6	109038135	109038136	LINC00222	387111	-34720	CGI	FALSE	FALSE	TRUE
cg05246657	chr6	52930357	52930358	FBXO9	26268	560	CGI	TRUE	TRUE	FALSE
cg05259507	chr6	15691800	15691801	DTNBP1	84062	-28510	CGI	FALSE	FALSE	TRUE
cg05360422	chr6	74363449	74363450	SLC17A5	26503	286	CGI	FALSE	TRUE	FALSE
cg05371005	chr6	7389895	7389896	CAGE1	285782	45	CGI	TRUE	FALSE	FALSE
cg05439195	chr6	169613210	169613211	THBS2	7058	40925	CGI	FALSE	FALSE	TRUE
cg05447100	chr6	168188992	168188993	C6orf123	26238	8545	Non-CGI	FALSE	TRUE	FALSE
cg05545172	chr6	32811777	32811778	LOC100507463	100507463	-84	CGI	TRUE	TRUE	FALSE
cg05674737	chr6	10723046	10723047	TMEM14C	51522	-100	CGI-N-Shore	TRUE	FALSE	FALSE
cg05789359	chr6	168377723	168377724	HGC6.3	100128124	-103	CGI	TRUE	FALSE	FALSE
cg05886241	chr6	28557575	28557576	SCAND3	114821	-2462	CGI	FALSE	TRUE	FALSE
cg06015119	chr6	56911219	56911220	KIAA1586	57691	-163	CGI-N-Shore	TRUE	FALSE	FALSE
cg06025938	chr6	106959592	106959593	AIM1	202	286	CGI-S-Shore	TRUE	FALSE	FALSE
cg06171076	chr6	26156557	26156558	HIST1H1E	3008	0	CGI	TRUE	FALSE	FALSE
cg06213964	chr6	21665905	21665906	LINC00340	401237	901	CGI	TRUE	TRUE	FALSE
cg06251420	chr6	168684623	168684624	DACT2	168002	35777	CGI	FALSE	FALSE	TRUE
cg06276084	chr6	168377594	168377595	HGC6.3	100128124	23	CGI	TRUE	FALSE	FALSE
cg06361403	chr6	32938781	32938782	BRD2	6046	2343	CGI	TRUE	TRUE	FALSE
cg06432342	chr6	44134066	44134067	CAPN11	11131	7517	Non-CGI	FALSE	TRUE	FALSE
cg06526693	chr6	19805277	19805278	ID4	3400	-32338	CGI	TRUE	FALSE	FALSE
cg06589246	chr6	158589183	158589184	SERAC1	84947	127	CGI	TRUE	FALSE	FALSE
cg06680214	chr6	33422417	33422418	ZBTB9	221504	60	CGI	TRUE	FALSE	FALSE
cg07037004	chr6	159065838	159065839	DYNLT1	6993	-33	CGI	TRUE	FALSE	FALSE
cg07157396	chr6	170760710	170760711	PSMB1	5689	101705	CGI-N-Shelf	FALSE	FALSE	TRUE
cg07172036	chr6	15663356	15663357	DTNBP1	84062	-66	CGI	TRUE	FALSE	FALSE
cg07584663	chr6	31697834	31697835	DDAH2	23564	203	CGI	TRUE	FALSE	FALSE
cg07798131	chr6	41471673	41471674	FOXP4	116113	-42489	CGI	FALSE	TRUE	FALSE
cg07906941	chr6	44041048	44041049	MRPL14	64928	54141	CGI	FALSE	TRUE	FALSE
cg07914959	chr6	91006321	91006322	BACH2	60468	304	CGI	TRUE	FALSE	FALSE
cg08149789	chr6	32940799	32940800	BRD2	6046	4361	CGI	TRUE	TRUE	FALSE
cg08169901	chr6	163834872	163834873	CAHM	100526820	108	CGI	TRUE	FALSE	FALSE
cg08172044	chr6	126070462	126070463	HEY2	23493	1681	CGI	TRUE	TRUE	FALSE
cg08290850	chr6	44238228	44238229	TMEM151B	441151	-250	CGI	TRUE	FALSE	FALSE
cg08472398	chr6	26156741	26156742	HIST1H1E	3008	181	CGI	TRUE	FALSE	FALSE
cg08556822	chr6	47445311	47445312	CD2AP	23607	-212	CGI	TRUE	FALSE	FALSE
cg08590257	chr6	159796425	159796426	FNDC1	84624	205995	CGI	FALSE	FALSE	TRUE
cg08692175	chr6	166667504	166667505	PRR18	285800	54365	CGI	FALSE	FALSE	TRUE
cg08754317	chr6	693257	693258	EXOC2	55770	-147	CGI	TRUE	FALSE	FALSE
cg08920807	chr6	30654751	30654752	PPP1R18	170954	919	CGI	TRUE	TRUE	FALSE
cg08955651	chr6	75994470	75994471	TMEM30A	55754	160	CGI	TRUE	FALSE	FALSE
cg08984202	chr6	30421649	30421650	HLA-E	3133	-35532	CGI	FALSE	FALSE	TRUE
cg09048084	chr6	108881022	108881023	FOXO3	2309	-2	CGI	TRUE	FALSE	FALSE
cg09386619	chr6	125420923	125420924	TPD52L1	7164	-53954	CGI	FALSE	FALSE	TRUE
cg09507968	chr6	170373755	170373756	LINC00242	401288	-174833	CGI	FALSE	FALSE	TRUE
cg09531436	chr6	31371557	31371558	MICA	100507436	3995	CGI	FALSE	TRUE	FALSE
cg09570682	chr6	106429443	106429444	PRDM1	639	-104750	CGI	FALSE	FALSE	TRUE
cg09657982	chr6	1424677	1424678	FOXF2	2295	34607	Non-CGI	FALSE	FALSE	TRUE
cg09681335	chr6	74233510	74233511	EEF1A1	1915	-2754	CGI	FALSE	FALSE	TRUE
cg10054150	chr6	31828287	31828288	NEU1	4758	2420	CGI-N-Shore	FALSE	TRUE	FALSE
cg10089294	chr6	44191204	44191205	SLC29A1	2030	3961	CGI	TRUE	TRUE	FALSE
cg10599345	chr6	137114243	137114244	MAP3K5	4217	-586	CGI	TRUE	FALSE	FALSE
cg10624161	chr6	107349251	107349252	C6orf203	51250	-154	CGI-N-Shore	TRUE	FALSE	FALSE
cg10683054	chr6	132129037	132129038	ENPP1	5167	-117	CGI	TRUE	FALSE	FALSE
cg10717387	chr6	26057256	26057257	HIST1H1C	3006	-556	CGI-S-Shore	TRUE	FALSE	FALSE
cg10733080	chr6	157527564	157527565	TMEM242	729515	217687	CGI	FALSE	TRUE	FALSE
cg10969178	chr6	31838402	31838403	NEU1	4758	-7692	Non-CGI	FALSE	TRUE	FALSE
cg11003645	chr6	143382007	143382008	AIG1	51390	1506	CGI	TRUE	TRUE	FALSE
cg11229160	chr6	5510800	5510801	FARS2	10667	249522	Non-CGI	FALSE	TRUE	FALSE
cg11263624	chr6	35227228	35227229	ZNF76	7629	541	CGI	TRUE	TRUE	FALSE
cg11460110	chr6	30530458	30530459	GNL1	2794	-5086	Non-CGI	FALSE	TRUE	FALSE
cg11497372	chr6	27513092	27513093	ZNF184	7738	-72194	CGI	TRUE	FALSE	FALSE
cg11539275	chr6	116421888	116421889	NT5DC1	221294	-109	CGI	TRUE	FALSE	FALSE
cg11553116	chr6	2871823	2871824	MGC39372	221756	4919	CGI-S-Shore	FALSE	TRUE	FALSE
cg11661250	chr6	26021799	26021800	HIST1H4A	8359	-106	CGI-S-Shore	TRUE	FALSE	FALSE
cg11911648	chr6	30418902	30418903	HLA-E	3133	-38279	CGI	FALSE	FALSE	TRUE
cg12050713	chr6	53412803	53412804	GCLC	2729	-2875	CGI	FALSE	FALSE	TRUE
cg12216054	chr6	33424213	33424214	ZBTB9	221504	1856	CGI-S-Shore	TRUE	TRUE	FALSE
cg12832355	chr6	33290648	33290649	DAXX	1616	143	CGI	TRUE	FALSE	FALSE
cg12991830	chr6	100038960	100038961	PRDM13	59336	-15688	CGI	FALSE	FALSE	TRUE
cg13071476	chr6	31830920	31830921	NEU1	4758	-210	CGI	TRUE	FALSE	FALSE
cg13099644	chr6	32097877	32097878	FKBPL	63943	188	CGI	TRUE	FALSE	FALSE
cg13104508	chr6	157527531	157527532	TMEM242	729515	217720	CGI	FALSE	TRUE	FALSE
cg13138832	chr6	32374162	32374163	BTNL2	56244	736	Non-CGI	FALSE	TRUE	FALSE
cg13150400	chr6	135819157	135819158	LINC00271	100131814	217	CGI	TRUE	TRUE	FALSE
cg13161113	chr6	158438198	158438199	SYNJ2	8871	35309	Non-CGI	TRUE	TRUE	FALSE
cg13293729	chr6	28911902	28911903	TRIM27	5987	-20133	CGI	TRUE	FALSE	FALSE
cg13319975	chr6	146136371	146136372	FBXO30	84085	-449	CGI	TRUE	TRUE	FALSE
cg13391363	chr6	30710682	30710683	FLOT1	10211	-228	CGI	TRUE	FALSE	FALSE
cg13440645	chr6	150067466	150067467	NUP43	348995	220	CGI	FALSE	TRUE	FALSE
cg13561948	chr6	33422406	33422407	ZBTB9	221504	49	CGI	TRUE	FALSE	FALSE
cg13612515	chr6	28872335	28872336	TRIM27	5987	19431	Non-CGI	FALSE	TRUE	FALSE
cg13794009	chr6	31697530	31697531	DDAH2	23564	507	CGI	TRUE	TRUE	FALSE
cg13832604	chr6	7142024	7142025	RREB1	6239	34193	CGI	FALSE	TRUE	FALSE
cg14063914	chr6	158588963	158588964	SERAC1	84947	347	CGI	TRUE	TRUE	FALSE
cg14265813	chr6	35435985	35435986	RPL10A	4736	-191	CGI	TRUE	FALSE	FALSE
cg14368954	chr6	168122607	168122608	C6orf123	26238	74930	CGI	FALSE	FALSE	TRUE
cg14463529	chr6	31649082	31649083	LY6G5C	80741	2733	CGI	TRUE	TRUE	FALSE
cg14550653	chr6	52149695	52149696	MCM3	4172	-112	CGI	TRUE	FALSE	FALSE
cg14619640	chr6	30585541	30585542	MRPS18B	28973	54	CGI	TRUE	FALSE	FALSE
cg14739378	chr6	46655306	46655307	TDRD6	221400	-304	CGI	TRUE	FALSE	FALSE
cg14776114	chr6	126069223	126069224	HEY2	23493	442	CGI-S-Shore	TRUE	TRUE	FALSE
cg15082394	chr6	33264525	33264526	RGL2	5863	2638	CGI-N-Shore	TRUE	TRUE	FALSE
cg15100630	chr6	30524468	30524469	PRR3	80742	-16	CGI	TRUE	FALSE	FALSE
cg15344492	chr6	3253892	3253893	PSMG4	389362	-5268	CGI	FALSE	TRUE	FALSE
cg15558061	chr6	58399793	58399794	GUSBP4	375513	-112068	CGI	FALSE	FALSE	TRUE
cg15829535	chr6	33048760	33048761	HLA-DPA1	3113	-204	CGI	TRUE	TRUE	FALSE
cg16018130	chr6	84569284	84569285	CYB5R4	51167	-84	CGI-N-Shore	TRUE	FALSE	FALSE
cg16482183	chr6	26056742	26056743	HIST1H1C	3006	-42	CGI	TRUE	FALSE	FALSE
cg16498533	chr6	74230343	74230344	EEF1A1	1915	410	CGI	TRUE	TRUE	FALSE
cg16553327	chr6	15663344	15663345	DTNBP1	84062	-54	CGI	TRUE	FALSE	FALSE
cg16648952	chr6	106553157	106553158	PRDM1	639	18961	CGI	FALSE	TRUE	FALSE
cg16668548	chr6	31697545	31697546	DDAH2	23564	492	CGI	TRUE	TRUE	FALSE
cg16869487	chr6	105307853	105307854	HACE1	57531	-58	CGI	TRUE	FALSE	FALSE
cg16885296	chr6	26284938	26284939	HIST1H4H	8365	787	CGI	TRUE	TRUE	FALSE
cg17124278	chr6	31632953	31632954	CSNK2B	1460	-702	CGI	TRUE	TRUE	FALSE
cg17298279	chr6	158982078	158982079	TMEM181	57583	24609	CGI	FALSE	TRUE	FALSE
cg17303756	chr6	99279108	99279109	POU3F2	5454	-3470	CGI	FALSE	FALSE	TRUE
cg17329834	chr6	131380543	131380544	EPB41L2	2037	3917	CGI-N-Shelf	FALSE	TRUE	FALSE
cg17497965	chr6	17282606	17282607	RBM24	221662	796	CGI	TRUE	TRUE	FALSE
cg17515456	chr6	30312866	30312867	RPP21	79897	-38	CGI-N-Shore	TRUE	TRUE	FALSE
cg17583526	chr6	139695867	139695868	CITED2	10370	-81	CGI	TRUE	FALSE	FALSE
cg17625256	chr6	150436654	150436655	PPP1R14C	81706	-27532	CGI-S-Shore	FALSE	FALSE	TRUE
cg17875922	chr6	37045823	37045824	FGD2	221472	72399	Non-CGI	FALSE	FALSE	TRUE
cg18082080	chr6	150263070	150263071	ULBP2	80328	-64	CGI	TRUE	FALSE	FALSE
cg18180874	chr6	30585650	30585651	MRPS18B	28973	163	CGI	TRUE	FALSE	FALSE
cg18419045	chr6	32076147	32076148	TNXB	7148	9322	Non-CGI	FALSE	TRUE	FALSE
cg18632135	chr6	35996485	35996486	MAPK14	1432	1030	CGI	FALSE	TRUE	FALSE
cg18663325	chr6	4021670	4021671	PRPF4B	8899	100	CGI	TRUE	FALSE	FALSE
cg18736676	chr6	109053447	109053448	LINC00222	387111	-19408	Non-CGI	FALSE	FALSE	TRUE
cg18739800	chr6	27806020	27806021	HIST1H2AK	8330	95	CGI	TRUE	FALSE	FALSE
cg19051105	chr6	42928407	42928408	GNMT	27232	-91	CGI	TRUE	FALSE	FALSE
cg19110902	chr6	30698936	30698937	TUBB	203068	10778	Non-CGI	FALSE	TRUE	FALSE
cg19331040	chr6	30882208	30882209	VARS2	57176	619	CGI	TRUE	TRUE	FALSE
cg19409583	chr6	169273973	169273974	THBS2	7058	380162	CGI	FALSE	FALSE	TRUE
cg19677203	chr6	31783322	31783323	HSPA1A	3303	30	CGI	TRUE	TRUE	FALSE
cg19735538	chr6	33560953	33560954	LINC00336	401253	160	CGI	TRUE	FALSE	FALSE
cg19995471	chr6	90052148	90052149	UBE2J1	51465	10469	Non-CGI	FALSE	TRUE	FALSE
cg20235337	chr6	42981612	42981613	MEA1	4201	46	CGI	TRUE	TRUE	FALSE
cg20364735	chr6	13615554	13615555	NOL7	51406	-3	CGI	TRUE	FALSE	FALSE
cg20530204	chr6	33244709	33244710	B3GALT4	8705	-206	CGI-N-Shore	TRUE	FALSE	FALSE
cg20603557	chr6	33281576	33281577	TAPBP	6892	586	CGI	FALSE	TRUE	FALSE
cg20954960	chr6	28602854	28602855	SCAND3	114821	-47741	CGI	TRUE	FALSE	FALSE
cg20980653	chr6	33143760	33143761	COL11A2	1302	16483	Non-CGI	FALSE	TRUE	FALSE
cg21026663	chr6	26189234	26189235	HIST1H4D	8360	68	CGI	TRUE	FALSE	FALSE
cg21277995	chr6	393239	393240	IRF4	3662	1499	CGI	FALSE	TRUE	FALSE
cg21427300	chr6	74233399	74233400	EEF1A1	1915	-2643	CGI	FALSE	FALSE	TRUE
cg21485120	chr6	31707746	31707747	MSH5-SAPCD1	100532732	20	CGI	TRUE	FALSE	FALSE
cg21717959	chr6	163148762	163148763	PARK2	5071	70	CGI	TRUE	TRUE	FALSE
cg21800309	chr6	99797222	99797223	FAXC	84553	307	CGI	TRUE	FALSE	FALSE
cg21988569	chr6	30640445	30640446	DHX16	8449	383	CGI	TRUE	TRUE	FALSE
cg21988950	chr6	30131691	30131692	TRIM15	89870	707	CGI	TRUE	FALSE	FALSE
cg22085055	chr6	27661905	27661906	LOC100507173	100507173	90	CGI	TRUE	FALSE	FALSE
cg22366783	chr6	15662764	15662765	DTNBP1	84062	523	CGI	FALSE	TRUE	FALSE
cg22369037	chr6	31516024	31516025	NFKBIL1	4795	1395	Non-CGI	TRUE	TRUE	FALSE
cg22408278	chr6	30029039	30029040	ZNRD1	30834	2	CGI	TRUE	FALSE	FALSE
cg22413126	chr6	32812472	32812473	PSMB8	5696	238	CGI	TRUE	TRUE	FALSE
cg22481950	chr6	161395786	161395787	MAP3K4	4216	-17034	Non-CGI	FALSE	FALSE	TRUE
cg22847579	chr6	42185566	42185567	MRPS10	55173	65	CGI	TRUE	FALSE	FALSE
cg22992815	chr6	28641704	28641705	SCAND3	114821	-86591	CGI	TRUE	FALSE	FALSE
cg23015983	chr6	108396139	108396140	OSTM1	28962	-197	CGI	TRUE	FALSE	FALSE
cg23073451	chr6	33385236	33385237	CUTA	51596	827	CGI-N-Shore	FALSE	TRUE	FALSE
cg23191528	chr6	33393802	33393803	SYNGAP1	8831	5954	CGI-S-Shore	FALSE	TRUE	FALSE
cg23213158	chr6	168222288	168222289	MLLT4-AS1	653483	5186	CGI-N-Shelf	FALSE	FALSE	TRUE
cg23601095	chr6	26197514	26197515	HIST1H3D	8351	1948	CGI	TRUE	TRUE	FALSE
cg23709674	chr6	36410515	36410516	KCTD20	222658	-27	CGI	TRUE	FALSE	FALSE
cg23867718	chr6	148663583	148663584	SASH1	23328	-144	CGI	TRUE	FALSE	FALSE
cg23997640	chr6	169129596	169129597	SMOC2	64094	287764	Non-CGI	FALSE	FALSE	TRUE
cg24016627	chr6	30043095	30043096	RNF39	80352	531	CGI	TRUE	FALSE	FALSE
cg24075332	chr6	151712594	151712595	ZBTB2	57621	81	CGI	TRUE	FALSE	FALSE
cg24385694	chr6	4282346	4282347	ECI2	10455	-146514	CGI	FALSE	FALSE	TRUE
cg24454932	chr6	170532633	170532634	LOC154449	154449	39022	CGI	FALSE	FALSE	TRUE
cg24513883	chr6	33290607	33290608	DAXX	1616	184	CGI	TRUE	TRUE	FALSE
cg24603235	chr6	33588219	33588220	ITPR3	3710	-935	CGI-N-Shore	TRUE	FALSE	FALSE
cg24659411	chr6	38607933	38607934	BTBD9	114781	-8	CGI	TRUE	FALSE	FALSE
cg24850577	chr6	31926767	31926768	NELFE	7936	95	CGI	TRUE	FALSE	FALSE
cg25004838	chr6	32112189	32112190	PRRT1	80863	8669	CGI-N-Shelf	FALSE	FALSE	TRUE
cg25017994	chr6	29627296	29627297	MOG	4340	2537	Non-CGI	FALSE	TRUE	FALSE
cg25209552	chr6	31367442	31367443	MICA	100507436	-117	CGI-N-Shore	TRUE	FALSE	FALSE
cg25302087	chr6	21668049	21668050	LINC00340	401237	3045	CGI-S-Shore	TRUE	TRUE	FALSE
cg25312118	chr6	35227386	35227387	ZNF76	7629	699	CGI	TRUE	TRUE	FALSE
cg25351606	chr6	100917427	100917428	SIM1	6492	-4621	CGI	FALSE	FALSE	TRUE
cg25406166	chr6	91320964	91320965	MAP3K7	6885	-24056	CGI	FALSE	FALSE	TRUE
cg25511667	chr6	33048732	33048733	HLA-DPA1	3113	-176	CGI	TRUE	TRUE	FALSE
cg25559531	chr6	31937394	31937395	STK19	8859	-1556	CGI-N-Shore	TRUE	TRUE	FALSE
cg25753473	chr6	170532835	170532836	LOC154449	154449	38820	CGI	FALSE	FALSE	TRUE
cg25919202	chr6	142468350	142468351	VTA1	51534	-58	CGI	TRUE	FALSE	FALSE
cg26092988	chr6	30034794	30034795	PPP1R11	6992	-136	CGI	TRUE	FALSE	FALSE
cg26198430	chr6	166796458	166796459	MPC1	51660	26	CGI	TRUE	FALSE	FALSE
cg26349375	chr6	150464124	150464125	PPP1R14C	81706	-62	CGI	TRUE	FALSE	FALSE
cg26379705	chr6	168813334	168813335	SMOC2	64094	-28495	CGI	FALSE	FALSE	TRUE
cg26539455	chr6	31786772	31786773	HSPA1L	3305	-3270	CGI-S-Shore	TRUE	FALSE	FALSE
cg26668828	chr6	292823	292824	DUSP22	56940	721	CGI	FALSE	TRUE	FALSE
cg26738916	chr6	31126003	31126004	CCHCR1	54535	10	CGI	TRUE	FALSE	FALSE
cg26813794	chr6	30584952	30584953	PPP1R10	5514	66	CGI	TRUE	TRUE	FALSE
cg27015207	chr6	150067738	150067739	NUP43	348995	-49	CGI	TRUE	FALSE	FALSE
cg27052777	chr6	33290408	33290409	DAXX	1616	383	CGI-S-Shore	TRUE	TRUE	FALSE
cg27088830	chr6	166401018	166401019	LINC00602	441177	-19	CGI-S-Shore	TRUE	FALSE	FALSE
cg27139933	chr6	170600026	170600027	DLL1	28514	-328	CGI	TRUE	FALSE	FALSE
cg27169278	chr6	35181924	35181925	SCUBE3	222663	-264	CGI	TRUE	FALSE	FALSE
cg27260738	chr6	91297046	91297047	MAP3K7	6885	-138	CGI	TRUE	FALSE	FALSE
cg27299725	chr6	97345805	97345806	NDUFAF4	29078	-37	CGI	TRUE	FALSE	FALSE
cg27427357	chr6	26027618	26027619	HIST1H4B	8366	-137	CGI	TRUE	FALSE	FALSE
cg27567401	chr6	75915782	75915783	COL12A1	1303	-158	CGI	TRUE	FALSE	FALSE
cg27620230	chr6	88032386	88032387	SMIM8	57150	79	CGI	FALSE	TRUE	FALSE
cg00084687	chr7	92076896	92076897	GATAD1	57798	130	CGI	TRUE	FALSE	FALSE
cg00373376	chr7	2130669	2130670	MAD1L1	8379	141912	CGI-S-Shore	FALSE	TRUE	FALSE
cg00508334	chr7	23510438	23510439	IGF2BP3	10643	-442	CGI	TRUE	FALSE	FALSE
cg00523812	chr7	130081019	130081020	CEP41	95681	-164	CGI	TRUE	FALSE	FALSE
cg00702840	chr7	75703958	75703959	MDH2	4191	26564	CGI	FALSE	FALSE	TRUE
cg00722445	chr7	106685033	106685034	PRKAR2B	5577	-143	CGI	TRUE	FALSE	FALSE
cg01239704	chr7	157605569	157605570	LOC100506585	100506585	-41706	CGI	FALSE	TRUE	FALSE
cg01942926	chr7	5821227	5821228	RNF216	54476	132	CGI	TRUE	FALSE	FALSE
cg01943577	chr7	158741284	158741285	LINC00689	154822	-59759	CGI	FALSE	FALSE	TRUE
cg02027143	chr7	99036504	99036505	PTCD1	26024	-41	CGI	TRUE	TRUE	FALSE
cg02266348	chr7	6566324	6566325	GRID2IP	392862	24741	CGI	FALSE	TRUE	FALSE
cg02400740	chr7	19157938	19157939	TWIST1	7291	-642	CGI	TRUE	FALSE	FALSE
cg02425263	chr7	1265197	1265198	UNCX	340260	-7455	CGI	FALSE	FALSE	TRUE
cg02470440	chr7	157854772	157854773	LOC100506585	100506585	207494	CGI	FALSE	TRUE	FALSE
cg02487654	chr7	130081063	130081064	CEP41	95681	-208	CGI	TRUE	FALSE	FALSE
cg02656801	chr7	993932	993933	ADAP1	11033	21301	CGI	FALSE	TRUE	FALSE
cg02801839	chr7	2598701	2598702	IQCE	23288	68	CGI	TRUE	FALSE	FALSE
cg02897449	chr7	140178796	140178797	MKRN1	23608	571	CGI	FALSE	TRUE	FALSE
cg02990291	chr7	96625586	96625587	DLX6	1750	-9702	CGI-N-Shore	FALSE	TRUE	FALSE
cg03146005	chr7	635812	635813	FLJ44511	441307	75783	CGI-N-Shore	FALSE	TRUE	FALSE
cg03286969	chr7	121784102	121784103	AASS	10157	240	CGI	FALSE	TRUE	FALSE
cg03294164	chr7	35077725	35077726	DPY19L1	23333	-71	CGI	TRUE	FALSE	FALSE
cg03379270	chr7	889293	889294	GET4	51608	-2292	CGI	FALSE	TRUE	FALSE
cg03383295	chr7	1709580	1709581	ELFN1	392617	-39216	CGI	FALSE	FALSE	TRUE
cg03480698	chr7	158114659	158114660	MIR595	693180	210844	CGI	FALSE	TRUE	FALSE
cg03664772	chr7	786682	786683	PRKAR1B	5575	-19368	CGI	FALSE	TRUE	FALSE
cg04126760	chr7	132299570	132299571	PLXNA4	91584	33875	CGI-N-Shore	FALSE	TRUE	FALSE
cg04214710	chr7	157602725	157602726	LOC100506585	100506585	-44550	CGI	FALSE	TRUE	FALSE
cg04271782	chr7	104654707	104654708	MLL5	55904	69	CGI	TRUE	FALSE	FALSE
cg04348816	chr7	5461417	5461418	TNRC18	84629	3626	CGI	TRUE	TRUE	FALSE
cg04494750	chr7	100304693	100304694	POP7	10248	1016	CGI	TRUE	TRUE	FALSE
cg04510807	chr7	2054241	2054242	MIR4655	100616160	-170351	CGI	FALSE	TRUE	FALSE
cg04591132	chr7	72985577	72985578	TBL2	26608	7434	CGI-S-Shore	FALSE	TRUE	FALSE
cg04609841	chr7	4012372	4012373	FOXK1	221937	-671014	CGI-N-Shore	FALSE	TRUE	FALSE
cg04961235	chr7	4901628	4901629	PAPOLB	56903	-2	CGI	TRUE	TRUE	FALSE
cg05065989	chr7	27205200	27205201	HOXA9	3205	-50	CGI	TRUE	TRUE	FALSE
cg05250768	chr7	27209270	27209271	MIR196B	442920	-87	CGI	TRUE	TRUE	FALSE
cg05305155	chr7	158073351	158073352	MIR595	693180	252152	CGI	FALSE	TRUE	FALSE
cg05318486	chr7	5553423	5553424	FBXL18	80028	-23	CGI	TRUE	FALSE	FALSE
cg05462543	chr7	155251716	155251717	EN2	2020	891	CGI	TRUE	FALSE	FALSE
cg05529686	chr7	3849359	3849360	SDK1	221935	508278	Non-CGI	FALSE	TRUE	FALSE
cg05663341	chr7	96634660	96634661	DLX6	1750	-628	CGI	TRUE	TRUE	FALSE
cg05707386	chr7	92157135	92157136	PEX1	5189	708	CGI	TRUE	TRUE	FALSE
cg06064049	chr7	66057363	66057364	LOC493754	493754	6	CGI	TRUE	FALSE	FALSE
cg06098368	chr7	63386616	63386617	LOC100506050	100506050	103862	CGI	FALSE	FALSE	TRUE
cg06105987	chr7	151483394	151483395	PRKAG2-AS1	100505483	-90731	CGI-S-Shelf	FALSE	TRUE	FALSE
cg06123544	chr7	5632476	5632477	FSCN1	6624	39	CGI	TRUE	FALSE	FALSE
cg06159087	chr7	92157992	92157993	RBM48	84060	-93	CGI	TRUE	FALSE	FALSE
cg06161738	chr7	151722986	151722987	GALNT11	63917	207	CGI	FALSE	TRUE	FALSE
cg06219267	chr7	100183965	100183966	FBXO24	26261	8	CGI	TRUE	FALSE	FALSE
cg06223186	chr7	1544111	1544112	INTS1	26173	-92	CGI	TRUE	FALSE	FALSE
cg06307046	chr7	16685776	16685777	BZW2	28969	16	CGI	TRUE	FALSE	FALSE
cg06642093	chr7	104653910	104653911	LOC100216545	100216545	676	CGI	TRUE	FALSE	FALSE
cg07028821	chr7	140773905	140773906	TMEM178B	100507421	-125	CGI	TRUE	FALSE	FALSE
cg07123811	chr7	156761107	156761108	NOM1	64434	18689	CGI	FALSE	TRUE	FALSE
cg07135629	chr7	30951709	30951710	GHRHR	2692	-51925	CGI	TRUE	TRUE	FALSE
cg07166333	chr7	158741244	158741245	LINC00689	154822	-59799	CGI	FALSE	FALSE	TRUE
cg07190543	chr7	8261154	8261155	ICA1	3382	41029	Non-CGI	FALSE	TRUE	FALSE
cg07297397	chr7	23510112	23510113	IGF2BP3	10643	-116	CGI	TRUE	FALSE	FALSE
cg07302069	chr7	27196286	27196287	HOXA7	3204	8	CGI	TRUE	FALSE	FALSE
cg07482935	chr7	103630013	103630014	RELN	5649	-49	CGI	TRUE	FALSE	FALSE
cg07598549	chr7	96635868	96635869	DLX6	1750	577	CGI	FALSE	TRUE	FALSE
cg07687814	chr7	112580077	112580078	C7orf60	154743	-144	CGI	TRUE	FALSE	FALSE
cg07702750	chr7	28998214	28998215	LOC100506497	100506497	-21367	CGI	TRUE	FALSE	FALSE
cg07718324	chr7	133995578	133995579	SLC35B4	84912	6247	Non-CGI	FALSE	TRUE	FALSE
cg07794522	chr7	44646075	44646076	OGDH	4967	-44	CGI	TRUE	FALSE	FALSE
cg07870486	chr7	56019566	56019567	MRPS17	51373	-43	CGI	TRUE	FALSE	FALSE
cg08082879	chr7	158798629	158798630	LINC00689	154822	-2414	CGI	FALSE	FALSE	TRUE
cg08132980	chr7	2632320	2632321	IQCE	23288	33687	CGI	FALSE	TRUE	FALSE
cg08368520	chr7	4747026	4747027	FOXK1	221937	63637	CGI	FALSE	TRUE	FALSE
cg08530030	chr7	44530236	44530237	NUDCD3	23386	147	CGI	TRUE	FALSE	FALSE
cg08566247	chr7	12726792	12726793	ARL4A	10124	339	CGI	TRUE	TRUE	FALSE
cg08632164	chr7	65971372	65971373	LOC493754	493754	85997	CGI	FALSE	FALSE	TRUE
cg08650910	chr7	20817530	20817531	SP8	221833	8976	CGI	FALSE	FALSE	TRUE
cg08732352	chr7	35298391	35298392	TBX20	57057	-4679	CGI	FALSE	FALSE	TRUE
cg08766915	chr7	35734704	35734705	HERPUD2	64224	66	CGI	TRUE	FALSE	FALSE
cg08905662	chr7	102789948	102789949	NAPEPLD	222236	57	CGI	TRUE	FALSE	FALSE
cg08906366	chr7	4803811	4803812	AP5Z1	9907	-11449	CGI	FALSE	TRUE	FALSE
cg08944400	chr7	77045405	77045406	PION	54103	310	CGI	FALSE	TRUE	FALSE
cg08964780	chr7	27209463	27209464	MIR196B	442920	-280	CGI	TRUE	TRUE	FALSE
cg09087503	chr7	127672473	127672474	LRRC4	64101	-1470	CGI	TRUE	TRUE	FALSE
cg09141965	chr7	1269385	1269386	UNCX	340260	-3267	CGI	FALSE	FALSE	TRUE
cg09165414	chr7	24834789	24834790	DFNA5	1687	-37149	CGI	FALSE	FALSE	TRUE
cg09244601	chr7	131864510	131864511	PLXNA4	91584	468935	Non-CGI	FALSE	TRUE	FALSE
cg09265173	chr7	72972201	72972202	BCL7B	9275	-135	CGI	TRUE	FALSE	FALSE
cg09570031	chr7	151216994	151216995	RHEB	6009	14	CGI	TRUE	FALSE	FALSE
cg09611656	chr7	156755775	156755776	NOM1	64434	13357	CGI-S-Shore	FALSE	TRUE	FALSE
cg09759737	chr7	158037881	158037882	MIR595	693180	287622	CGI	FALSE	TRUE	FALSE
cg09872104	chr7	134855509	134855510	C7orf49	78996	67	CGI	TRUE	FALSE	FALSE
cg09928203	chr7	44924598	44924599	PURB	5814	360	CGI	TRUE	FALSE	FALSE
cg10161111	chr7	6200140	6200141	USP42	84132	55589	CGI-S-Shore	FALSE	TRUE	FALSE
cg10169177	chr7	561744	561745	FLJ44511	441307	1715	CGI	TRUE	FALSE	FALSE
cg10322824	chr7	77428712	77428713	PHTF2	57157	602	CGI	TRUE	TRUE	FALSE
cg10639750	chr7	138666259	138666260	KIAA1549	57670	-194	CGI	TRUE	FALSE	FALSE
cg10649384	chr7	87505489	87505490	DBF4	10926	-53	CGI	TRUE	FALSE	FALSE
cg10857807	chr7	2272392	2272393	MAD1L1	8379	189	CGI	FALSE	TRUE	FALSE
cg10889506	chr7	33149117	33149118	RP9	6100	-114	CGI	TRUE	FALSE	FALSE
cg11316146	chr7	104624178	104624179	LOC100216546	100216546	7432	CGI	TRUE	FALSE	FALSE
cg11609154	chr7	139026010	139026011	C7orf55	154791	112	CGI	TRUE	TRUE	FALSE
cg11765671	chr7	6197576	6197577	USP42	84132	53025	CGI	FALSE	TRUE	FALSE
cg11813617	chr7	91876047	91876048	ANKIB1	54467	498	CGI	TRUE	TRUE	FALSE
cg11828163	chr7	5531009	5531010	MIR589	693174	4537	CGI-S-Shelf	FALSE	TRUE	FALSE
cg11878069	chr7	37956425	37956426	SFRP4	6424	98	CGI	TRUE	FALSE	FALSE
cg12072333	chr7	134896347	134896348	WDR91	29062	-30	CGI	TRUE	FALSE	FALSE
cg12665951	chr7	35734808	35734809	HERPUD2	64224	-35	CGI	TRUE	FALSE	FALSE
cg12712184	chr7	155790801	155790802	SHH	6469	-185833	CGI	FALSE	FALSE	TRUE
cg12776163	chr7	35840706	35840707	2007-09-01	989	109	CGI	TRUE	FALSE	FALSE
cg13049357	chr7	44367340	44367341	CAMK2B	816	-2109	CGI-S-Shore	FALSE	FALSE	TRUE
cg13266018	chr7	5637739	5637740	FSCN1	6624	5302	CGI-S-Shelf	FALSE	TRUE	FALSE
cg13329889	chr7	5705264	5705265	FSCN1	6624	72827	Non-CGI	FALSE	TRUE	FALSE
cg13334285	chr7	27779610	27779611	TAX1BP1	8887	617	CGI-S-Shore	TRUE	TRUE	FALSE
cg13338302	chr7	86974956	86974957	CROT	54677	4	CGI	TRUE	FALSE	FALSE
cg13342360	chr7	128488920	128488921	ATP6V1F	9296	-13935	CGI-N-Shore	FALSE	TRUE	FALSE
cg13606434	chr7	5464498	5464499	TNRC18	84629	545	CGI	TRUE	TRUE	FALSE
cg13775091	chr7	158066145	158066146	MIR595	693180	259358	CGI	FALSE	TRUE	FALSE
cg14056620	chr7	44836144	44836145	PPIA	5478	-95	CGI	TRUE	FALSE	FALSE
cg14249876	chr7	44143993	44143994	AEBP1	165	32	CGI	TRUE	FALSE	FALSE
cg14258366	chr7	41982794	41982795	INHBA	3624	-240087	CGI-S-Shore	FALSE	FALSE	TRUE
cg14586887	chr7	28966691	28966692	LOC100506497	100506497	-52890	CGI	FALSE	FALSE	TRUE
cg14629509	chr7	134143991	134143992	AKR1B1	231	-102	CGI	TRUE	FALSE	FALSE
cg14743534	chr7	44079036	44079037	FLJ35390	255031	337	CGI-N-Shore	TRUE	TRUE	FALSE
cg14784944	chr7	4855785	4855786	MIR4656	100616465	-27514	CGI-N-Shore	FALSE	TRUE	FALSE
cg14785449	chr7	97501736	97501737	ASNS	440	116	CGI	TRUE	FALSE	FALSE
cg15134787	chr7	57471759	57471760	MIR3147	100422939	-970	CGI	TRUE	FALSE	FALSE
cg15304692	chr7	150065217	150065218	REPIN1	29803	-142	CGI-N-Shore	TRUE	FALSE	FALSE
cg15483084	chr7	956502	956503	ADAP1	11033	58731	CGI-S-Shore	FALSE	TRUE	FALSE
cg15509053	chr7	123558137	123558138	SPAM1	6677	-7147	Non-CGI	FALSE	FALSE	TRUE
cg15532408	chr7	151083252	151083253	WDR86-AS1	100131176	-23068	CGI-S-Shelf	FALSE	TRUE	FALSE
cg15683295	chr7	27245542	27245543	HOTTIP	100316868	5501	CGI	FALSE	TRUE	FALSE
cg15740366	chr7	128049868	128049869	IMPDH1	3614	166	CGI	TRUE	FALSE	FALSE
cg15764975	chr7	1631847	1631848	PSMG3-AS1	114796	22137	CGI	FALSE	FALSE	TRUE
cg15778346	chr7	75947261	75947262	HSPB1	3315	15385	CGI	FALSE	FALSE	TRUE
cg15788265	chr7	112758734	112758735	LOC401397	401397	-96	CGI	TRUE	FALSE	FALSE
cg15914316	chr7	2083197	2083198	MAD1L1	8379	189384	CGI-S-Shore	FALSE	TRUE	FALSE
cg15957615	chr7	43909224	43909225	MRPS24	64951	-78	CGI	TRUE	TRUE	FALSE
cg16029838	chr7	44530503	44530504	NUDCD3	23386	-117	CGI	TRUE	FALSE	FALSE
cg16056465	chr7	111202450	111202451	IMMP2L	83943	121	CGI	TRUE	TRUE	FALSE
cg16105558	chr7	119912874	119912875	KCND2	3751	-846	CGI	TRUE	FALSE	FALSE
cg16135995	chr7	73668739	73668740	RFC2	5982	0	CGI	TRUE	FALSE	FALSE
cg16168014	chr7	42928245	42928246	PSMA2	5683	43558	CGI	FALSE	FALSE	TRUE
cg16286275	chr7	36429476	36429477	ANLN	54443	43	CGI	TRUE	TRUE	FALSE
cg16292251	chr7	101882808	101882809	SH2B2	10603	-45595	CGI	FALSE	TRUE	FALSE
cg16699849	chr7	98923489	98923490	ARPC1A	10552	-5	CGI	TRUE	FALSE	FALSE
cg16782613	chr7	44058922	44058923	POLR2J4	84820	-173	CGI	TRUE	FALSE	FALSE
cg16803141	chr7	149470343	149470344	ZNF467	168544	-47	CGI	TRUE	FALSE	FALSE
cg16840616	chr7	93831	93832	FAM20C	56975	-99136	CGI	FALSE	FALSE	TRUE
cg16929793	chr7	616628	616629	FLJ44511	441307	56599	CGI	FALSE	TRUE	FALSE
cg17025484	chr7	99102690	99102691	ZKSCAN5	23660	416	CGI	TRUE	TRUE	FALSE
cg17112812	chr7	112032599	112032600	IFRD1	3475	-30598	CGI-S-Shore	FALSE	FALSE	TRUE
cg17150306	chr7	855575	855576	SUN1	23353	380	CGI	TRUE	TRUE	FALSE
cg17431401	chr7	23511004	23511005	IGF2BP3	10643	-1008	CGI	TRUE	FALSE	FALSE
cg17625535	chr7	4807525	4807526	AP5Z1	9907	-7735	CGI-S-Shore	FALSE	TRUE	FALSE
cg17667912	chr7	1947333	1947334	MIR4655	100616160	-63443	CGI	FALSE	TRUE	FALSE
cg17717259	chr7	29846259	29846260	WIPF3	644150	88	CGI	TRUE	FALSE	FALSE
cg17780595	chr7	37488872	37488873	ELMO1	9844	21	CGI	TRUE	FALSE	FALSE
cg17983724	chr7	72298804	72298805	TYW1B	441250	7	CGI	TRUE	FALSE	FALSE
cg18075761	chr7	75617028	75617029	TMEM120A	83862	6962	CGI	FALSE	TRUE	FALSE
cg18078841	chr7	77648624	77648625	PHTF2	57157	220514	CGI	FALSE	TRUE	FALSE
cg18122501	chr7	157353164	157353165	MIR153-2	406945	13948	CGI	FALSE	TRUE	FALSE
cg18125549	chr7	140714781	140714782	MRPS33	51650	0	CGI	TRUE	FALSE	FALSE
cg18185116	chr7	598729	598730	FLJ44511	441307	38700	CGI	FALSE	TRUE	FALSE
cg18334211	chr7	151328924	151328925	RHEB	6009	-111913	CGI	FALSE	TRUE	FALSE
cg18494018	chr7	148581708	148581709	EZH2	2146	-266	CGI	TRUE	FALSE	FALSE
cg18526602	chr7	6487739	6487740	KDELR2	11014	36108	CGI	TRUE	TRUE	FALSE
cg18762727	chr7	101006089	101006090	COL26A1	136227	-31	CGI	TRUE	FALSE	FALSE
cg18846423	chr7	44887838	44887839	H2AFV	94239	-112	CGI	TRUE	FALSE	FALSE
cg18884388	chr7	190334	190335	FAM20C	56975	-2633	CGI	FALSE	FALSE	TRUE
cg18935479	chr7	151217026	151217027	RHEB	6009	-15	CGI	TRUE	FALSE	FALSE
cg18989174	chr7	149470820	149470821	ZNF467	168544	-524	CGI	TRUE	FALSE	FALSE
cg19027985	chr7	157785628	157785629	LOC100506585	100506585	138350	CGI-N-Shore	FALSE	TRUE	FALSE
cg19040163	chr7	75932877	75932878	HSPB1	3315	1001	CGI	TRUE	TRUE	FALSE
cg19466590	chr7	148396053	148396054	CUL1	8454	1046	CGI	TRUE	TRUE	FALSE
cg19725553	chr7	43797898	43797899	BLVRA	644	-372	CGI	TRUE	FALSE	FALSE
cg19725725	chr7	50658418	50658419	DDC	1644	-25263	CGI-S-Shelf	FALSE	TRUE	FALSE
cg19875547	chr7	38670804	38670805	AMPH	273	361	CGI	FALSE	TRUE	FALSE
cg20218237	chr7	127292117	127292118	SND1	27044	-83	CGI	TRUE	FALSE	FALSE
cg20392203	chr7	636590	636591	FLJ44511	441307	76561	CGI	FALSE	TRUE	FALSE
cg20393609	chr7	102105195	102105196	ALKBH4	54784	124	CGI	TRUE	FALSE	FALSE
cg20492436	chr7	77325562	77325563	RSBN1L	222194	-179	CGI	TRUE	FALSE	FALSE
cg20964328	chr7	11013816	11013817	PHF14	9678	316	CGI	TRUE	FALSE	FALSE
cg21077049	chr7	96132850	96132851	C7orf76	401388	-14	Non-CGI	TRUE	FALSE	FALSE
cg21159241	chr7	39662930	39662931	RALA	5898	-220	CGI	TRUE	FALSE	FALSE
cg21447117	chr7	27224873	27224874	HOXA11	3207	-30	CGI	TRUE	FALSE	FALSE
cg21473741	chr7	138436009	138436010	TMEM213	155006	-46728	CGI	FALSE	TRUE	FALSE
cg21622555	chr7	6312471	6312472	CYTH3	9265	-228	CGI	TRUE	FALSE	FALSE
cg21773872	chr7	30722320	30722321	INMT	11185	-15279	CGI	TRUE	TRUE	FALSE
cg21926039	chr7	134331413	134331414	BPGM	669	-116	CGI	TRUE	FALSE	FALSE
cg21928307	chr7	36192369	36192370	EEPD1	80820	-465	CGI	TRUE	FALSE	FALSE
cg21998512	chr7	92077031	92077032	GATAD1	57798	265	CGI	TRUE	FALSE	FALSE
cg22121237	chr7	119915258	119915259	KCND2	3751	1535	CGI	TRUE	FALSE	FALSE
cg22285878	chr7	130419173	130419174	KLF14	136259	-284	CGI-S-Shore	TRUE	FALSE	FALSE
cg22307732	chr7	2559417	2559418	LFNG	3955	7253	CGI	TRUE	TRUE	FALSE
cg22417032	chr7	157350867	157350868	MIR153-2	406945	16245	CGI	FALSE	TRUE	FALSE
cg22441533	chr7	93520175	93520176	TFPI2	7980	-109	CGI	TRUE	TRUE	FALSE
cg22459664	chr7	139929764	139929765	LOC100134229	100134229	52702	CGI	FALSE	FALSE	TRUE
cg22521356	chr7	25219976	25219977	C7orf31	136895	-158	CGI	TRUE	FALSE	FALSE
cg22902969	chr7	56131795	56131796	SUMF2	25870	-120	CGI-N-Shore	TRUE	TRUE	FALSE
cg22944461	chr7	128431009	128431010	CCDC136	64753	-453	CGI	TRUE	FALSE	FALSE
cg22951727	chr7	127292125	127292126	SND1	27044	-75	CGI	TRUE	FALSE	FALSE
cg23115136	chr7	100281759	100281760	GIGYF1	64599	5109	CGI	FALSE	TRUE	FALSE
cg23143978	chr7	155436512	155436513	RBM33	155435	-689	CGI	TRUE	FALSE	FALSE
cg23232891	chr7	150827897	150827898	GBX1	2636	36968	CGI-N-Shore	FALSE	TRUE	FALSE
cg23296475	chr7	97736378	97736379	LMTK2	22853	180	CGI	TRUE	FALSE	FALSE
cg23345340	chr7	6435144	6435145	RAC1	5879	21017	Non-CGI	FALSE	TRUE	FALSE
cg23355967	chr7	16685943	16685944	BZW2	28969	183	CGI	TRUE	TRUE	FALSE
cg23469188	chr7	108166441	108166442	PNPLA8	50640	2162	CGI	FALSE	TRUE	FALSE
cg23544526	chr7	66368779	66368780	TMEM248	55069	-17422	CGI-S-Shore	FALSE	FALSE	TRUE
cg23590389	chr7	157102769	157102770	DNAJB6	10049	-26939	CGI-N-Shelf	FALSE	FALSE	TRUE
cg23623142	chr7	83824290	83824291	SEMA3A	10371	-72	Non-CGI	TRUE	FALSE	FALSE
cg23657377	chr7	75368420	75368421	HIP1	3092	-136	CGI	TRUE	FALSE	FALSE
cg24302095	chr7	50861049	50861050	GRB10	2887	108	CGI	TRUE	FALSE	FALSE
cg24512935	chr7	5938293	5938294	CCZ1	51622	-46	CGI	TRUE	FALSE	FALSE
cg24531255	chr7	93520012	93520013	TFPI2	7980	51	CGI	TRUE	TRUE	FALSE
cg24603113	chr7	1105321	1105322	GPR146	115330	8179	CGI	FALSE	TRUE	FALSE
cg24701257	chr7	73097740	73097741	DNAJC30	84277	39	CGI	TRUE	FALSE	FALSE
cg24746677	chr7	101847575	101847576	SH2B2	10603	-80828	CGI-S-Shore	FALSE	TRUE	FALSE
cg24957423	chr7	138554232	138554233	ATP6V0A4	50617	-71290	CGI-S-Shore	FALSE	TRUE	FALSE
cg25059070	chr7	157609801	157609802	LOC100506585	100506585	-37474	CGI-S-Shore	FALSE	TRUE	FALSE
cg25152498	chr7	152456815	152456816	ACTR3B	57180	-34	CGI	TRUE	FALSE	FALSE
cg25311335	chr7	83479479	83479480	SEMA3E	9723	-200999	Non-CGI	FALSE	FALSE	TRUE
cg25340241	chr7	104654702	104654703	MLL5	55904	64	CGI	TRUE	FALSE	FALSE
cg25360747	chr7	32529948	32529949	LSM5	23658	4920	CGI	TRUE	TRUE	FALSE
cg25392362	chr7	100271250	100271251	GNB2	2783	-111	CGI	TRUE	FALSE	FALSE
cg25500890	chr7	73082059	73082060	VPS37D	155382	-113	CGI	TRUE	FALSE	FALSE
cg25825008	chr7	2586681	2586682	BRAT1	221927	8709	CGI-S-Shore	FALSE	TRUE	FALSE
cg25887619	chr7	101558435	101558436	CUX1	1523	99250	CGI-S-Shore	FALSE	TRUE	FALSE
cg26011105	chr7	43590148	43590149	LOC100506895	100506895	-28006	Non-CGI	FALSE	TRUE	FALSE
cg26243894	chr7	128049684	128049685	IMPDH1	3614	350	CGI	FALSE	TRUE	FALSE
cg26470115	chr7	181898	181899	FAM20C	56975	-11069	CGI	FALSE	FALSE	TRUE
cg26517831	chr7	2768566	2768567	AMZ1	155185	49402	CGI-N-Shore	FALSE	TRUE	FALSE
cg26605518	chr7	92157676	92157677	PEX1	5189	167	CGI	TRUE	FALSE	FALSE
cg26773803	chr7	148958927	148958928	ZNF783	100289678	-333	CGI	TRUE	FALSE	FALSE
cg27068399	chr7	72993203	72993204	TBL2	26608	-189	CGI	TRUE	FALSE	FALSE
cg27415006	chr7	75368387	75368388	HIP1	3092	-103	CGI	TRUE	FALSE	FALSE
cg27447286	chr7	95705527	95705528	MIR591	693176	143539	CGI	FALSE	TRUE	FALSE
cg27546065	chr7	4923383	4923384	RADIL	55698	-47	CGI	TRUE	FALSE	FALSE
cg00467244	chr8	142428240	142428241	PTP4A3	11156	-3765	CGI	FALSE	TRUE	FALSE
cg00886954	chr8	145047713	145047714	PLEC	5339	3198	CGI	TRUE	TRUE	FALSE
cg00892792	chr8	142297584	142297585	SLC45A4	57210	-33358	CGI	FALSE	FALSE	TRUE
cg01039695	chr8	22014129	22014130	LGI3	203190	213	CGI	TRUE	FALSE	FALSE
cg01054658	chr8	33342664	33342665	MAK16	84549	-19	CGI	TRUE	TRUE	FALSE
cg01616178	chr8	41755140	41755141	ANK1	286	-859	CGI	TRUE	FALSE	FALSE
cg01795694	chr8	102217913	102217914	ZNF706	51123	45	CGI	TRUE	FALSE	FALSE
cg02503933	chr8	90770146	90770147	RIPK2	8767	170	CGI	TRUE	FALSE	FALSE
cg02637537	chr8	22447181	22447182	C8orf58	541565	-9931	CGI-S-Shore	TRUE	TRUE	FALSE
cg02639285	chr8	91658767	91658768	TMEM64	169200	145090	CGI	TRUE	TRUE	FALSE
cg02681480	chr8	81490484	81490485	ZBTB10	65986	92629	CGI	FALSE	FALSE	TRUE
cg02693150	chr8	96040122	96040123	MIR3150A	100422964	-45018	CGI-S-Shelf	FALSE	TRUE	FALSE
cg02918786	chr8	109255596	109255597	EIF3E	3646	5361	Non-CGI	TRUE	TRUE	FALSE
cg03083632	chr8	144766577	144766578	ZNF707	286075	-43	CGI	TRUE	FALSE	FALSE
cg03184037	chr8	30891338	30891339	PURG	29942	-106	CGI	TRUE	FALSE	FALSE
cg03193865	chr8	145510099	145510100	BOP1	23246	5019	CGI-N-Shore	FALSE	TRUE	FALSE
cg03348901	chr8	41436158	41436159	AGPAT6	137964	450	CGI-S-Shore	FALSE	TRUE	FALSE
cg03509771	chr8	48091864	48091865	LOC100287846	100287846	-9064	CGI	FALSE	FALSE	TRUE
cg03995571	chr8	130952330	130952331	FAM49B	51571	76565	CGI	TRUE	TRUE	FALSE
cg04219515	chr8	70746368	70746369	SLCO5A1	81796	929	CGI	TRUE	TRUE	FALSE
cg04263685	chr8	54755961	54755962	ATP6V1H	51606	-110	CGI	TRUE	FALSE	FALSE
cg04269065	chr8	30890980	30890981	WRN	7486	201	CGI	TRUE	FALSE	FALSE
cg04418647	chr8	50653901	50653902	SNTG1	54212	-168446	Non-CGI	FALSE	FALSE	TRUE
cg04880091	chr8	43132451	43132452	POTEA	340441	-15132	CGI	FALSE	FALSE	TRUE
cg05418877	chr8	29207624	29207625	DUSP4	1846	641	CGI	TRUE	FALSE	FALSE
cg05715005	chr8	37620159	37620160	PROSC	11212	57	CGI	TRUE	FALSE	FALSE
cg05754853	chr8	116660506	116660507	TRPS1	7227	20720	CGI-N-Shore	FALSE	TRUE	FALSE
cg05893876	chr8	120428507	120428508	NOV	4856	-43	CGI	TRUE	FALSE	FALSE
cg05965392	chr8	53478624	53478625	FAM150A	389658	-602	CGI	TRUE	FALSE	FALSE
cg06065245	chr8	27779151	27779152	MIR4287	100422828	-35517	CGI	FALSE	TRUE	FALSE
cg06424138	chr8	102701376	102701377	GRHL2	79977	196707	Non-CGI	FALSE	TRUE	FALSE
cg06708255	chr8	54570293	54570294	ATP6V1H	51606	185555	CGI	FALSE	FALSE	TRUE
cg06763467	chr8	958731	958732	ERICH1	157697	-277504	CGI-S-Shore	FALSE	TRUE	FALSE
cg06931245	chr8	28351501	28351502	FZD3	7976	-219	CGI	TRUE	FALSE	FALSE
cg07002711	chr8	63998640	63998641	TTPA	7274	-27	CGI	TRUE	FALSE	FALSE
cg07135964	chr8	94753241	94753242	RBM12B	389677	-16	CGI	TRUE	FALSE	FALSE
cg07179816	chr8	49647907	49647908	EFCAB1	79645	-36	CGI	TRUE	FALSE	FALSE
cg07229027	chr8	124408743	124408744	ATAD2	29028	19845	CGI	TRUE	TRUE	FALSE
cg07358015	chr8	28748218	28748219	HMBOX1	79618	306	CGI	TRUE	TRUE	FALSE
cg07472191	chr8	145773003	145773004	C8orf82	414919	-18544	CGI	FALSE	TRUE	FALSE
cg07548580	chr8	134465835	134465836	ST3GAL1	6482	118346	CGI	FALSE	FALSE	TRUE
cg07926952	chr8	62823833	62823834	MIR4470	100616484	196485	CGI	FALSE	FALSE	TRUE
cg07969676	chr8	10590641	10590642	C8orf74	203076	60493	CGI	FALSE	TRUE	FALSE
cg08246494	chr8	60031920	60031921	TOX	9760	-152	CGI	TRUE	FALSE	FALSE
cg08297140	chr8	124553689	124553690	FBXO32	114907	-195	CGI	TRUE	FALSE	FALSE
cg08447380	chr8	8185703	8185704	SGK223	157285	53552	CGI-S-Shelf	FALSE	TRUE	FALSE
cg08464177	chr8	143625597	143625598	ARC	23237	70234	CGI-S-Shore	FALSE	TRUE	FALSE
cg08530859	chr8	143851287	143851288	LYNX1	66004	8351	Non-CGI	TRUE	TRUE	FALSE
cg08714886	chr8	121457617	121457618	MRPL13	28998	28	CGI	TRUE	FALSE	FALSE
cg08762403	chr8	143557190	143557191	BAI1	575	11812	CGI	FALSE	TRUE	FALSE
cg08781253	chr8	144417160	144417161	TOP1MT	116447	24987	CGI	TRUE	TRUE	FALSE
cg08872321	chr8	1308229	1308230	LOC286083	286083	-57401	CGI	FALSE	FALSE	TRUE
cg09315468	chr8	38089562	38089563	DDHD2	23259	552	CGI	TRUE	TRUE	FALSE
cg10302505	chr8	128748092	128748093	MYC	4609	326	CGI	TRUE	TRUE	FALSE
cg10433678	chr8	144943023	144943024	EPPK1	83481	4409	CGI	TRUE	FALSE	FALSE
cg10640168	chr8	141360745	141360746	TRAPPC9	83696	107931	CGI	FALSE	TRUE	FALSE
cg10641504	chr8	29120525	29120526	KIF13B	23303	83	CGI	TRUE	FALSE	FALSE
cg10891996	chr8	67687474	67687475	PTTG3P	26255	-7233	CGI	TRUE	TRUE	FALSE
cg11242200	chr8	22857399	22857400	RHOBTB2	23221	12468	CGI	TRUE	TRUE	FALSE
cg11498870	chr8	88886243	88886244	DCAF4L2	138009	51	CGI	TRUE	FALSE	FALSE
cg11856918	chr8	20054956	20054957	ATP6V1B2	526	251	CGI	TRUE	FALSE	FALSE
cg12089360	chr8	1719543	1719544	CLN8	2055	7672	CGI	FALSE	TRUE	FALSE
cg12175729	chr8	140715540	140715541	KCNK9	51305	-240	CGI	TRUE	FALSE	FALSE
cg12619398	chr8	38089444	38089445	DDHD2	23259	434	CGI	TRUE	TRUE	FALSE
cg12822242	chr8	127572993	127572994	FAM84B	157638	-2281	CGI-S-Shelf	FALSE	FALSE	TRUE
cg12892311	chr8	8860454	8860455	ERI1	90459	139	CGI	TRUE	FALSE	FALSE
cg13162328	chr8	22462125	22462126	KIAA1967	57805	-18	CGI	TRUE	FALSE	FALSE
cg13273799	chr8	29206352	29206353	DUSP4	1846	1913	CGI	TRUE	TRUE	FALSE
cg13406423	chr8	110346640	110346641	ENY2	56943	87	CGI	TRUE	TRUE	FALSE
cg13949202	chr8	142070685	142070686	PTK2	5747	-59272	CGI	FALSE	FALSE	TRUE
cg14231959	chr8	1897035	1897036	KBTBD11	9920	-25007	CGI	FALSE	TRUE	FALSE
cg14320087	chr8	74005537	74005538	SBSPON	157869	-29	CGI	TRUE	FALSE	FALSE
cg14350318	chr8	8185742	8185743	SGK223	157285	53513	CGI-S-Shelf	FALSE	TRUE	FALSE
cg14487887	chr8	125384848	125384849	TMEM65	157378	90	CGI	TRUE	FALSE	FALSE
cg14597214	chr8	38585937	38585938	TACC1	6867	232	CGI	TRUE	FALSE	FALSE
cg14827056	chr8	141550539	141550540	CHRAC1	54108	29141	CGI-N-Shore	FALSE	TRUE	FALSE
cg14905331	chr8	92082498	92082499	OTUD6B	51633	73	CGI	TRUE	FALSE	FALSE
cg14940705	chr8	67687437	67687438	PTTG3P	26255	-7196	CGI	TRUE	TRUE	FALSE
cg15450295	chr8	80696411	80696412	HEY1	23462	-16312	CGI	FALSE	TRUE	FALSE
cg15466569	chr8	21777061	21777062	XPO7	23039	-117	CGI	TRUE	FALSE	FALSE
cg15537082	chr8	9762300	9762301	MIR124-1	406907	-1317	CGI	TRUE	FALSE	FALSE
cg15649474	chr8	41507852	41507853	MIR486	619554	10172	CGI	FALSE	TRUE	FALSE
cg15661450	chr8	56987227	56987228	RPS20	6224	-86	CGI	TRUE	FALSE	FALSE
cg15969314	chr8	67624648	67624649	SGK3	23678	-3	CGI	TRUE	TRUE	FALSE
cg16561172	chr8	128746032	128746033	MYC	4609	-1731	CGI-N-Shore	TRUE	TRUE	FALSE
cg17003783	chr8	33330584	33330585	FUT10	84750	78	CGI	TRUE	FALSE	FALSE
cg17142066	chr8	528131	528132	C8orf42	157695	-32799	CGI	FALSE	FALSE	TRUE
cg17465133	chr8	12809420	12809421	KIAA1456	57604	6268	CGI	FALSE	TRUE	FALSE
cg17475643	chr8	10261972	10261973	PRSS55	203074	-121082	CGI	FALSE	TRUE	FALSE
cg17575602	chr8	97657211	97657212	CPQ	10404	-286	CGI	TRUE	FALSE	FALSE
cg17696629	chr8	94713190	94713191	FAM92A1	137392	416	CGI	TRUE	TRUE	FALSE
cg17720979	chr8	1327621	1327622	LOC286083	286083	-76793	CGI	FALSE	FALSE	TRUE
cg18022570	chr8	27950479	27950480	ELP3	55140	2729	CGI	TRUE	TRUE	FALSE
cg18331249	chr8	98862165	98862166	MATN2	4147	-19144	Non-CGI	FALSE	TRUE	FALSE
cg18494124	chr8	42996512	42996513	HGSNAT	138050	919	CGI	FALSE	TRUE	FALSE
cg18554116	chr8	141312979	141312980	TRAPPC9	83696	155697	Non-CGI	FALSE	TRUE	FALSE
cg18755296	chr8	53852446	53852447	NPBWR1	2831	-20	CGI	TRUE	FALSE	FALSE
cg18929889	chr8	1208878	1208879	LOC286083	286083	41947	CGI-S-Shore	FALSE	FALSE	TRUE
cg19197523	chr8	124428674	124428675	ATAD2	29028	-83	CGI	TRUE	FALSE	FALSE
cg20181482	chr8	94929834	94929835	PDP1	54704	750	CGI	TRUE	TRUE	FALSE
cg20223392	chr8	328499	328500	FBXO25	26260	-28307	CGI-N-Shore	FALSE	FALSE	TRUE
cg20392240	chr8	104383724	104383725	CTHRC1	115908	-60	CGI	TRUE	FALSE	FALSE
cg20713898	chr8	124780851	124780852	FAM91A1	157769	-29	CGI	TRUE	FALSE	FALSE
cg20980299	chr8	143356985	143356986	LINC00051	619434	77267	Non-CGI	FALSE	TRUE	FALSE
cg21001591	chr8	145831205	145831206	C8orf82	414919	-76746	CGI	FALSE	TRUE	FALSE
cg21206266	chr8	98656243	98656244	MTDH	92140	-162	CGI	TRUE	FALSE	FALSE
cg21220063	chr8	75233891	75233892	JPH1	56704	-328	CGI	TRUE	FALSE	FALSE
cg21453287	chr8	37963019	37963020	ASH2L	9070	7	CGI	TRUE	FALSE	FALSE
cg21643403	chr8	104383798	104383799	CTHRC1	115908	11	CGI	TRUE	FALSE	FALSE
cg21944972	chr8	2020566	2020567	MYOM2	9172	27407	CGI	FALSE	TRUE	FALSE
cg21964162	chr8	7407308	7407309	FAM90A7P	441317	32865	CGI	FALSE	FALSE	TRUE
cg21966860	chr8	145538097	145538098	DGAT1	8694	12468	CGI-S-Shore	FALSE	TRUE	FALSE
cg22046830	chr8	145133508	145133509	EXOSC4	54512	-12	CGI	TRUE	FALSE	FALSE
cg22062659	chr8	70747431	70747432	SLCO5A1	81796	-131	CGI	TRUE	FALSE	FALSE
cg22145576	chr8	144897413	144897414	SCRIB	23513	134	CGI	TRUE	FALSE	FALSE
cg22202929	chr8	106437825	106437826	ZFPM2	23414	106677	Non-CGI	FALSE	TRUE	FALSE
cg22732636	chr8	13373141	13373142	DLC1	10395	-711	Non-CGI	TRUE	FALSE	FALSE
cg22843129	chr8	669177	669178	ERICH1	157697	12047	CGI-S-Shore	FALSE	TRUE	FALSE
cg22873130	chr8	6264171	6264172	MCPH1	79648	57	CGI	TRUE	FALSE	FALSE
cg23176496	chr8	67687356	67687357	PTTG3P	26255	-7115	CGI	TRUE	TRUE	FALSE
cg23286173	chr8	142436030	142436031	PTP4A3	11156	4022	CGI-N-Shore	FALSE	TRUE	FALSE
cg23311531	chr8	94712629	94712630	LINC00535	642924	30	CGI	TRUE	FALSE	FALSE
cg23558764	chr8	30635400	30635401	UBXN8	7993	33709	Non-CGI	FALSE	FALSE	TRUE
cg23569945	chr8	54935029	54935030	TCEA1	6917	-20	CGI	TRUE	FALSE	FALSE
cg24255371	chr8	65488069	65488070	BHLHE22	27319	-4724	CGI	FALSE	TRUE	FALSE
cg24421504	chr8	75262575	75262576	GDAP1	54332	-41	CGI	TRUE	FALSE	FALSE
cg24783499	chr8	144594999	144595000	ZC3H3	23144	28619	CGI-N-Shore	FALSE	TRUE	FALSE
cg24836204	chr8	144450966	144450967	RHPN1	114822	-57	CGI	TRUE	FALSE	FALSE
cg24853644	chr8	133787923	133787924	PHF20L1	51105	318	CGI	FALSE	TRUE	FALSE
cg24911891	chr8	142405051	142405052	PTP4A3	11156	-26954	CGI	FALSE	TRUE	FALSE
cg24926872	chr8	54755585	54755586	ATP6V1H	51606	263	CGI	TRUE	TRUE	FALSE
cg24948990	chr8	143820828	143820829	SLURP1	57152	2999	CGI	FALSE	FALSE	TRUE
cg25088355	chr8	144691901	144691902	PYCRL	65263	-116	CGI	TRUE	FALSE	FALSE
cg25178798	chr8	145981145	145981146	ZNF251	90987	-174	CGI	TRUE	FALSE	FALSE
cg25223771	chr8	145105503	145105504	OPLAH	26873	10079	CGI	FALSE	FALSE	TRUE
cg25340432	chr8	3974225	3974226	CSMD1	64478	878101	CGI	FALSE	TRUE	FALSE
cg25403152	chr8	60031829	60031830	TOX	9760	-61	CGI	TRUE	FALSE	FALSE
cg25832771	chr8	72756058	72756059	MSC	9242	671	CGI	TRUE	TRUE	FALSE
cg25881328	chr8	1809920	1809921	ARHGEF10	9639	37770	CGI	FALSE	TRUE	FALSE
cg26068141	chr8	71315032	71315033	NCOA2	10499	986	CGI	FALSE	TRUE	FALSE
cg26077100	chr8	10587769	10587770	C8orf74	203076	57621	CGI	TRUE	TRUE	FALSE
cg26181277	chr8	48272891	48272892	KIAA0146	23514	99401	Non-CGI	FALSE	TRUE	FALSE
cg26182263	chr8	22224973	22224974	SLC39A14	23516	210	CGI	TRUE	TRUE	FALSE
cg26394008	chr8	146173463	146173464	ZNF16	7564	2809	CGI-N-Shelf	FALSE	TRUE	FALSE
cg26606393	chr8	144776974	144776975	BREA2	286076	-2309	CGI	FALSE	TRUE	FALSE
cg26696260	chr8	144588465	144588466	ZC3H3	23144	35153	CGI-S-Shelf	FALSE	TRUE	FALSE
cg26751877	chr8	59589151	59589152	NSMAF	8439	-16746	CGI	FALSE	FALSE	TRUE
cg26826136	chr8	95274566	95274567	GEM	2669	-18	CGI	TRUE	FALSE	FALSE
cg26831001	chr8	102092959	102092960	FLJ42969	441374	28676	CGI	FALSE	FALSE	TRUE
cg26844171	chr8	42249271	42249272	VDAC3	7419	-6	CGI	TRUE	FALSE	FALSE
cg27045396	chr8	128747201	128747202	MYC	4609	-562	CGI	TRUE	FALSE	FALSE
cg27127351	chr8	670293	670294	ERICH1	157697	10931	CGI	FALSE	TRUE	FALSE
cg27317242	chr8	23145699	23145700	R3HCC1	203069	86	CGI	FALSE	TRUE	FALSE
cg27535044	chr8	82633568	82633569	ZFAND1	79752	-28	CGI	TRUE	FALSE	FALSE
cg27627799	chr8	10005423	10005424	MSRA	4482	93592	CGI	FALSE	TRUE	FALSE
cg02062191	chr9	139377943	139377944	C9orf163	158055	-2	CGI	TRUE	TRUE	FALSE
cg02411961	chr9	34523230	34523231	ENHO	375704	-192	CGI	TRUE	FALSE	FALSE
cg03040243	chr9	100819229	100819230	NANS	54187	269	CGI	FALSE	TRUE	FALSE
cg11613875	chr9	27573889	27573890	C9orf72	203228	-46	CGI	TRUE	FALSE	FALSE
cg13441683	chr9	37785020	37785021	EXOSC3	51010	45	CGI	TRUE	FALSE	FALSE
cg13460467	chr9	132331664	132331665	C9orf50	375759	51389	CGI	FALSE	FALSE	TRUE
cg13466565	chr9	36136927	36136928	GLIPR2	152007	184	CGI	FALSE	TRUE	FALSE
cg13613965	chr9	130981287	130981288	CIZ1	25792	-14624	CGI	FALSE	TRUE	FALSE
cg13637899	chr9	26958030	26958031	PLAA	9373	-10561	CGI-S-Shore	FALSE	TRUE	FALSE
cg13653144	chr9	129375812	129375813	LMX1B	4010	-908	CGI	TRUE	FALSE	FALSE
cg13701086	chr9	140041732	140041733	GRIN1	2902	8122	CGI-S-Shore	FALSE	TRUE	FALSE
cg13722999	chr9	29826639	29826640	MIR873	100126316	-937685	CGI	FALSE	FALSE	TRUE
cg13732589	chr9	135457339	135457340	BARHL1	56751	-652	CGI	TRUE	FALSE	FALSE
cg13732677	chr9	101017931	101017932	TBC1D2	55357	70	CGI	TRUE	FALSE	FALSE
cg13752460	chr9	139641402	139641403	LOC100128593	100128593	788	CGI-S-Shore	FALSE	TRUE	FALSE
cg13796319	chr9	138593815	138593816	KCNT1	57582	-214	CGI	TRUE	FALSE	FALSE
cg13886636	chr9	130679606	130679607	ST6GALNAC4	27090	-300	CGI	TRUE	FALSE	FALSE
cg13910484	chr9	80851062	80851063	CEP78	84131	70	CGI	TRUE	FALSE	FALSE
cg14045486	chr9	78505662	78505663	PCSK5	5125	101	CGI	TRUE	FALSE	FALSE
cg14059921	chr9	34628952	34628953	ARID3C	138715	-940	CGI	TRUE	FALSE	FALSE
cg14069192	chr9	99381052	99381053	CDC14B	8555	1058	CGI	FALSE	TRUE	FALSE
cg14143209	chr9	132403939	132403940	ASB6	140459	507	CGI	TRUE	TRUE	FALSE
cg14161956	chr9	96329060	96329061	PHF2	5253	-9847	CGI	FALSE	FALSE	TRUE
cg14169740	chr9	139132818	139132819	QSOX2	169714	4867	CGI-N-Shore	FALSE	TRUE	FALSE
cg14188185	chr9	140293218	140293219	EXD3	54932	24494	CGI	FALSE	TRUE	FALSE
cg14221748	chr9	134370028	134370029	SNORD62A	26786	4154	CGI	FALSE	TRUE	FALSE
cg14250054	chr9	35829428	35829429	TMEM8B	51754	205	CGI	TRUE	TRUE	FALSE
cg14256536	chr9	140293439	140293440	EXD3	54932	24273	CGI	FALSE	TRUE	FALSE
cg14311538	chr9	139348775	139348776	INPP5E	56623	-14518	CGI-N-Shore	TRUE	TRUE	FALSE
cg14364472	chr9	139394549	139394550	SEC16A	9919	-16337	CGI-S-Shore	FALSE	TRUE	FALSE
cg14387545	chr9	77566841	77566842	C9orf40	55071	959	CGI	TRUE	TRUE	FALSE
cg14429012	chr9	34458458	34458459	FAM219A	203259	108	CGI	TRUE	FALSE	FALSE
cg14463853	chr9	86244969	86244970	IDNK	414328	7004	Non-CGI	FALSE	TRUE	FALSE
cg14483667	chr9	96010087	96010088	WNK2	65268	62874	CGI-S-Shore	FALSE	TRUE	FALSE
cg14492293	chr9	139093852	139093853	LHX3	8022	3101	CGI	FALSE	TRUE	FALSE
cg14566698	chr9	128024194	128024195	GAPVD1	26130	82	CGI	TRUE	FALSE	FALSE
cg14582970	chr9	125676085	125676086	ZBTB6	10773	-475	CGI-S-Shore	TRUE	FALSE	FALSE
cg14587902	chr9	136913560	136913561	BRD3	8019	20093	CGI	FALSE	TRUE	FALSE
cg14602351	chr9	88969757	88969758	ZCCHC6	79670	-354	CGI	TRUE	FALSE	FALSE
cg14619443	chr9	6681415	6681416	KDM4C	23081	-35078	CGI	FALSE	FALSE	TRUE
cg16645539	chr9	15422589	15422590	SNAPC3	6619	-191	CGI	TRUE	FALSE	FALSE
cg21157707	chr9	139908753	139908754	C9orf139	401563	-13161	CGI	FALSE	TRUE	FALSE
cg21211038	chr9	15422769	15422770	SNAPC3	6619	-11	CGI	TRUE	FALSE	FALSE
cg00039793	chr10	120925308	120925309	SFXN4	119559	-103	CGI	TRUE	FALSE	FALSE
cg00221745	chr10	104179478	104179479	PSD	5662	211	CGI	TRUE	TRUE	FALSE
cg00393546	chr10	461919	461920	PRR26	414235	-233967	CGI	TRUE	TRUE	FALSE
cg00444019	chr10	14646244	14646245	FRMD4A	55691	-142100	CGI	TRUE	TRUE	FALSE
cg00622375	chr10	29892014	29892015	MIR938	100126327	-738	Non-CGI	TRUE	TRUE	FALSE
cg00808243	chr10	86088214	86088215	CCSER2	54462	-194	CGI	TRUE	FALSE	FALSE
cg00919118	chr10	114886498	114886499	TCF7L2	6934	176488	CGI	TRUE	TRUE	FALSE
cg01195672	chr10	134557941	134557942	NKX6-2	84504	41594	CGI	FALSE	TRUE	FALSE
cg01240734	chr10	71892593	71892594	AIFM2	84883	95	CGI	TRUE	FALSE	FALSE
cg01275523	chr10	102504226	102504227	PAX2	5076	-1240	CGI-S-Shore	TRUE	FALSE	FALSE
cg01424147	chr10	103348258	103348259	DPCD	25911	168	CGI	TRUE	TRUE	FALSE
cg02065141	chr10	135101714	135101715	ADAM8	101	-11306	CGI	FALSE	TRUE	FALSE
cg02065151	chr10	126107665	126107666	OAT	4942	-119	CGI	TRUE	FALSE	FALSE
cg02100674	chr10	83636325	83636326	NRG3	10718	1254	CGI	TRUE	TRUE	FALSE
cg02150654	chr10	122216378	122216379	PPAPDC1A	196051	-86	CGI	TRUE	FALSE	FALSE
cg02271227	chr10	133484857	133484858	FLJ46300	399827	137676	CGI-S-Shore	FALSE	FALSE	TRUE
cg02399019	chr10	126772062	126772063	MIR4296	100423041	-50622	Non-CGI	FALSE	TRUE	FALSE
cg02524277	chr10	15130899	15130900	ACBD7	414149	-123	CGI	TRUE	FALSE	FALSE
cg02595832	chr10	129535786	129535787	FOXI2	399823	247	CGI	TRUE	FALSE	FALSE
cg02605601	chr10	3724557	3724558	KLF6	1316	102914	CGI	FALSE	TRUE	FALSE
cg02613380	chr10	99330076	99330077	ANKRD2	26287	-2178	CGI	FALSE	TRUE	FALSE
cg02754225	chr10	76971001	76971002	VDAC2	7417	1088	CGI	FALSE	TRUE	FALSE
cg03410436	chr10	1779904	1779905	ADARB2	105	-233	CGI	TRUE	FALSE	FALSE
cg03454028	chr10	32217895	32217896	ARHGAP12	94134	-124	CGI	TRUE	FALSE	FALSE
cg03801898	chr10	111767685	111767686	LOC100505933	100505933	452	CGI	TRUE	TRUE	FALSE
cg03922645	chr10	15001292	15001293	MEIG1	644890	-144	CGI	TRUE	TRUE	FALSE
cg03929743	chr10	15265252	15265253	NMT2	9397	-54556	Non-CGI	FALSE	TRUE	FALSE
cg03950689	chr10	133932254	133932255	JAKMIP3	282973	13940	CGI-S-Shore	FALSE	TRUE	FALSE
cg04074793	chr10	129924374	129924375	MKI67	4288	92	CGI	TRUE	FALSE	FALSE
cg04170468	chr10	122610882	122610883	WDR11-AS1	283089	-190	CGI	TRUE	FALSE	FALSE
cg04263684	chr10	134803259	134803260	NA	255352	-47169	CGI	FALSE	FALSE	TRUE
cg04382627	chr10	134351046	134351047	INPP5A	3632	-305	CGI	TRUE	FALSE	FALSE
cg04396312	chr10	88702403	88702404	MMRN2	79812	15020	CGI	FALSE	TRUE	FALSE
cg04707787	chr10	89622160	89622161	KLLN	100144748	1032	CGI	TRUE	FALSE	FALSE
cg04951051	chr10	79601860	79601861	DLG5	9231	84486	CGI	TRUE	TRUE	FALSE
cg04992974	chr10	1334207	1334208	LINC00200	399706	128498	Non-CGI	FALSE	TRUE	FALSE
cg05004228	chr10	14996045	14996046	MEIG1	644890	-5391	CGI	TRUE	TRUE	FALSE
cg05287529	chr10	101380128	101380129	SLC25A28	81894	38864	CGI	TRUE	TRUE	FALSE
cg05342655	chr10	125770239	125770240	CPXM2	119587	-70459	CGI	FALSE	TRUE	FALSE
cg05387457	chr10	21785997	21785998	C10orf114	399726	214	CGI	TRUE	FALSE	FALSE
cg05505307	chr10	13203784	13203785	MCM10	55388	229	CGI	FALSE	TRUE	FALSE
cg05543547	chr10	119135213	119135214	PDZD8	118987	-275	CGI	TRUE	FALSE	FALSE
cg05807485	chr10	133850441	133850442	BNIP3	664	-55005	CGI	FALSE	FALSE	TRUE
cg06082745	chr10	133795139	133795140	BNIP3	664	294	CGI	FALSE	TRUE	FALSE
cg06187344	chr10	3151576	3151577	PITRM1-AS1	100507034	-32215	CGI-S-Shore	FALSE	TRUE	FALSE
cg06226675	chr10	11485771	11485772	USP6NL	9712	167906	CGI	FALSE	FALSE	TRUE
cg06291112	chr10	75757817	75757818	VCL	7414	2865	CGI	TRUE	TRUE	FALSE
cg06296597	chr10	858900	858901	LARP4B	23185	72800	CGI-N-Shore	FALSE	TRUE	FALSE
cg06443918	chr10	104210692	104210693	C10orf95	79946	606	CGI	FALSE	TRUE	FALSE
cg06874216	chr10	131477661	131477662	MIR4297	100422873	163975	CGI-N-Shore	FALSE	TRUE	FALSE
cg06879152	chr10	60937041	60937042	PHYHIPL	84457	692	CGI	TRUE	TRUE	FALSE
cg06970090	chr10	73848823	73848824	SPOCK2	9806	-32	CGI-S-Shore	TRUE	TRUE	FALSE
cg07113562	chr10	52834093	52834094	PRKG1	5592	83181	CGI	TRUE	TRUE	FALSE
cg07876051	chr10	3159145	3159146	PITRM1-AS1	100507034	-24646	CGI-S-Shore	TRUE	TRUE	FALSE
cg07947549	chr10	53459378	53459379	CSTF2T	23283	-22	CGI	TRUE	TRUE	FALSE
cg08299755	chr10	99496695	99496696	ZFYVE27	118813	-181	CGI	TRUE	FALSE	FALSE
cg08327566	chr10	98480743	98480744	PIK3AP1	118788	-463	CGI-S-Shore	TRUE	FALSE	FALSE
cg08368587	chr10	14590662	14590663	FRMD4A	55691	-86518	Non-CGI	TRUE	TRUE	FALSE
cg08455454	chr10	94352726	94352727	KIF11	3832	-97	CGI	TRUE	FALSE	FALSE
cg08878967	chr10	104159285	104159286	NFKB2	4791	5055	CGI	FALSE	TRUE	FALSE
cg08905758	chr10	27443330	27443331	YME1L1	10730	17	CGI	TRUE	FALSE	FALSE
cg08941805	chr10	115614392	115614393	NHLRC2	374354	0	CGI	TRUE	FALSE	FALSE
cg08944476	chr10	71561505	71561506	COL13A1	1305	-137	CGI	TRUE	FALSE	FALSE
cg08978597	chr10	8087295	8087296	GATA3-AS1	399717	8150	CGI	FALSE	FALSE	TRUE
cg09053680	chr10	135044114	135044115	UTF1	8433	335	CGI	TRUE	FALSE	FALSE
cg09341154	chr10	125853893	125853894	CHST15	51363	-686	CGI	TRUE	FALSE	FALSE
cg09344229	chr10	55259527	55259528	MBL2	4153	-728066	Non-CGI	FALSE	FALSE	TRUE
cg09636079	chr10	105331513	105331514	NEURL	9148	77777	Non-CGI	FALSE	TRUE	FALSE
cg09659208	chr10	323366	323367	ZMYND11	10771	142960	CGI	FALSE	TRUE	FALSE
cg09688285	chr10	111682808	111682809	XPNPEP1	7511	501	CGI-N-Shore	FALSE	TRUE	FALSE
cg09690597	chr10	126281464	126281465	LHPP	64077	131122	CGI-S-Shelf	FALSE	TRUE	FALSE
cg09906488	chr10	12391008	12391009	CAMK1D	57118	-573	CGI	TRUE	FALSE	FALSE
cg09979641	chr10	135021100	135021101	UTF1	8433	-22676	CGI	FALSE	TRUE	FALSE
cg10195215	chr10	99348244	99348245	C10orf62	414157	-1204	Non-CGI	TRUE	TRUE	FALSE
cg10197862	chr10	95653705	95653706	SLC35G1	159371	-23	CGI	TRUE	FALSE	FALSE
cg10231213	chr10	3281984	3281985	PITRM1	10531	-66950	CGI	FALSE	FALSE	TRUE
cg10309340	chr10	102747329	102747330	C10orf2	56652	35	CGI	TRUE	FALSE	FALSE
cg10436918	chr10	114206690	114206691	VTI1A	143187	-64	CGI	TRUE	TRUE	FALSE
cg10607059	chr10	114709760	114709761	TCF7L2	6934	-247	CGI	TRUE	FALSE	FALSE
cg10654496	chr10	118609261	118609262	ENO4	387712	237	CGI	FALSE	TRUE	FALSE
cg10831391	chr10	3109765	3109766	PFKP	5214	52	CGI	TRUE	FALSE	FALSE
cg10887366	chr10	49892861	49892862	WDFY4	57705	-58	Non-CGI	TRUE	FALSE	FALSE
cg10949319	chr10	105154064	105154065	MIR1307	100302174	92	CGI-N-Shore	TRUE	TRUE	FALSE
cg10987705	chr10	99399946	99399947	MORN4	118812	-6032	CGI-N-Shore	TRUE	TRUE	FALSE
cg11048311	chr10	12084973	12084974	UPF2	26019	194	CGI	TRUE	FALSE	FALSE
cg11208259	chr10	61122518	61122519	FAM13C	220965	141	CGI	TRUE	FALSE	FALSE
cg11311579	chr10	102106754	102106755	SCD	6319	-16	CGI	TRUE	FALSE	FALSE
cg11314310	chr10	1120831	1120832	IDI1	3422	-18186	CGI	TRUE	TRUE	FALSE
cg11371933	chr10	53459365	53459366	CSTF2T	23283	-9	CGI	TRUE	TRUE	FALSE
cg11591516	chr10	85954316	85954317	CDHR1	92211	-94	CGI	TRUE	FALSE	FALSE
cg11660684	chr10	126490277	126490278	FAM175B	23172	-75	CGI	TRUE	FALSE	FALSE
cg11790551	chr10	134593345	134593346	NKX6-2	84504	6190	CGI	FALSE	TRUE	FALSE
cg11996395	chr10	103912126	103912127	NOLC1	9221	192	CGI	TRUE	FALSE	FALSE
cg12331743	chr10	104153933	104153934	NFKB2	4791	-294	CGI	TRUE	FALSE	FALSE
cg12335414	chr10	134359618	134359619	INPP5A	3632	8264	CGI	FALSE	TRUE	FALSE
cg12610564	chr10	18239805	18239806	SLC39A12	221074	-961	CGI	TRUE	FALSE	FALSE
cg12743976	chr10	31892154	31892155	ZEB1-AS1	220930	-284129	CGI	FALSE	FALSE	TRUE
cg12847800	chr10	120863609	120863610	FAM45B	55855	0	CGI	TRUE	FALSE	FALSE
cg13264059	chr10	129705415	129705416	PTPRE	5791	89	CGI	TRUE	FALSE	FALSE
cg13291704	chr10	15761498	15761499	ITGA8	8516	270	CGI	FALSE	TRUE	FALSE
cg13447927	chr10	103986128	103986129	ELOVL3	83401	-13	CGI	TRUE	FALSE	FALSE
cg13473894	chr10	13771383	13771384	PRPF18	8559	142443	Non-CGI	FALSE	TRUE	FALSE
cg13509954	chr10	30638275	30638276	MTPAP	55149	25100	CGI	TRUE	TRUE	FALSE
cg13544966	chr10	640085	640086	PRR26	414235	-55801	CGI	FALSE	TRUE	FALSE
cg13851956	chr10	43572430	43572431	RET	5979	-85	CGI	TRUE	FALSE	FALSE
cg14209793	chr10	105614994	105614995	SH3PXD2A	9644	168	CGI	TRUE	FALSE	FALSE
cg14663510	chr10	124895461	124895462	HMX3	340784	-104	CGI	TRUE	FALSE	FALSE
cg15193782	chr10	23217017	23217018	ARMC3	219681	62	CGI	TRUE	FALSE	FALSE
cg15317837	chr10	1033901	1033902	GTPBP4	23560	-446	CGI	TRUE	FALSE	FALSE
cg15433798	chr10	92913556	92913557	NUDT9P1	119369	-718	CGI	TRUE	FALSE	FALSE
cg15475055	chr10	35379345	35379346	CUL2	8453	223	CGI	TRUE	TRUE	FALSE
cg15942382	chr10	98273924	98273925	TLL2	7093	-240	CGI	TRUE	FALSE	FALSE
cg16316141	chr10	25305874	25305875	THNSL1	79896	365	CGI	TRUE	TRUE	FALSE
cg16355531	chr10	126370306	126370307	FAM53B	9679	108599	CGI-N-Shore	FALSE	TRUE	FALSE
cg16374437	chr10	5726683	5726684	FAM208B	54906	-116	CGI	TRUE	FALSE	FALSE
cg16402270	chr10	133274184	133274185	TCERG1L	256536	-164199	CGI	FALSE	FALSE	TRUE
cg16633951	chr10	42971575	42971576	LINC00839	84856	635	CGI	FALSE	TRUE	FALSE
cg16752962	chr10	98135190	98135191	OPALIN	93377	-16097	CGI	FALSE	TRUE	FALSE
cg17132517	chr10	133951829	133951830	JAKMIP3	282973	33515	CGI	FALSE	TRUE	FALSE
cg17133967	chr10	60144921	60144922	TFAM	7019	-253	CGI	TRUE	FALSE	FALSE
cg17227926	chr10	115860799	115860800	ADRB1	153	56992	CGI	FALSE	FALSE	TRUE
cg17251097	chr10	81838583	81838584	TMEM254	80195	156	CGI	TRUE	TRUE	FALSE
cg17267805	chr10	44880545	44880546	CXCL12	6387	0	CGI	TRUE	FALSE	FALSE
cg17523282	chr10	71871364	71871365	AIFM2	84883	21324	CGI-N-Shore	FALSE	TRUE	FALSE
cg17567560	chr10	105036863	105036864	INA	9118	-55	CGI	TRUE	FALSE	FALSE
cg17600863	chr10	93372507	93372508	LOC100188947	100188947	-1289	Non-CGI	TRUE	FALSE	FALSE
cg17642426	chr10	124739963	124739964	PSTK	118672	406	CGI	TRUE	FALSE	FALSE
cg17799334	chr10	12171683	12171684	SEC61A2	55176	42	CGI	TRUE	FALSE	FALSE
cg17843891	chr10	11780853	11780854	ECHDC3	79746	-3501	CGI-S-Shore	FALSE	FALSE	TRUE
cg17989358	chr10	30637977	30637978	MTPAP	55149	25398	CGI	FALSE	TRUE	FALSE
cg18276125	chr10	102749041	102749042	C10orf2	56652	1747	CGI	TRUE	TRUE	FALSE
cg18279326	chr10	102475324	102475325	PAX2	5076	-30142	CGI	FALSE	FALSE	TRUE
cg18425434	chr10	118429648	118429649	C10orf82	143379	125	CGI	TRUE	FALSE	FALSE
cg18530282	chr10	115439379	115439380	CASP7	840	443	CGI	TRUE	TRUE	FALSE
cg18607580	chr10	13542696	13542697	BEND7	222389	2278	Non-CGI	FALSE	TRUE	FALSE
cg18776286	chr10	52383679	52383680	SGMS1	259230	1242	CGI	TRUE	TRUE	FALSE
cg18802021	chr10	28032548	28032549	MKX	283078	2228	CGI	FALSE	TRUE	FALSE
cg18909516	chr10	94333808	94333809	IDE	3416	42	CGI	TRUE	FALSE	FALSE
cg19045313	chr10	93804999	93805000	BTAF1	9044	121262	CGI	FALSE	FALSE	TRUE
cg19046793	chr10	1669217	1669218	ADARB2-AS1	642394	100391	CGI-S-Shore	FALSE	TRUE	FALSE
cg19090784	chr10	134773853	134773854	NA	255352	-17763	CGI-N-Shore	FALSE	FALSE	TRUE
cg19279080	chr10	114910810	114910811	TCF7L2	6934	200800	CGI	FALSE	TRUE	FALSE
cg19487745	chr10	45567697	45567698	C10orf25	220979	-71226	Non-CGI	TRUE	FALSE	FALSE
cg19681528	chr10	69644405	69644406	SIRT1	23411	-20	CGI	TRUE	FALSE	FALSE
cg19899694	chr10	135237140	135237141	SPRN	503542	979	CGI	TRUE	TRUE	FALSE
cg20345915	chr10	121296042	121296043	RGS10	6001	6178	Non-CGI	TRUE	TRUE	FALSE
cg20520804	chr10	3149673	3149674	PITRM1-AS1	100507034	-34118	CGI-S-Shore	TRUE	TRUE	FALSE
cg20679084	chr10	28966475	28966476	BAMBI	25805	50	CGI	TRUE	FALSE	FALSE
cg22851378	chr10	133747932	133747933	PPP2R2D	55844	-26	CGI-N-Shelf	TRUE	FALSE	FALSE
cg23107754	chr10	120514968	120514969	CACUL1	143384	-209	CGI	TRUE	FALSE	FALSE
cg23227945	chr10	104154202	104154203	NFKB2	4791	-25	CGI	TRUE	FALSE	FALSE
cg23361862	chr10	15256422	15256423	NMT2	9397	-45726	CGI	FALSE	TRUE	FALSE
cg23797411	chr10	106399877	106399878	SORCS3	22986	-980	CGI	TRUE	FALSE	FALSE
cg23844018	chr10	334773	334774	ZMYND11	10771	154367	CGI	FALSE	TRUE	FALSE
cg23849965	chr10	51564816	51564817	NCOA4	8031	-290	CGI-N-Shore	TRUE	TRUE	FALSE
cg23968456	chr10	73521631	73521632	C10orf54	64115	11704	Non-CGI	TRUE	TRUE	FALSE
cg24009737	chr10	126781559	126781560	MIR4296	100423041	-60119	Non-CGI	FALSE	TRUE	FALSE
cg24305584	chr10	91295045	91295046	SLC16A12	387700	266	CGI	FALSE	TRUE	FALSE
cg24663455	chr10	131214929	131214930	MGMT	4255	-50523	CGI-S-Shore	FALSE	FALSE	TRUE
cg24826355	chr10	32344604	32344605	KIF5B	3799	765	CGI	TRUE	TRUE	FALSE
cg24831879	chr10	5566908	5566909	CALML3	810	-14	CGI	TRUE	FALSE	FALSE
cg25034155	chr10	80945359	80945360	ZMIZ1	57178	116566	Non-CGI	FALSE	TRUE	FALSE
cg25156463	chr10	131813474	131813475	EBF3	253738	-51382	CGI	FALSE	FALSE	TRUE
cg25195302	chr10	111970950	111970951	MXI1	4601	3586	CGI	FALSE	TRUE	FALSE
cg25222014	chr10	124714072	124714073	C10orf88	80007	-152	CGI	TRUE	FALSE	FALSE
cg25561913	chr10	77161129	77161130	ZNF503-AS2	100131213	-155	CGI	TRUE	FALSE	FALSE
cg25866173	chr10	105615767	105615768	SH3PXD2A	9644	-602	CGI	TRUE	FALSE	FALSE
cg26090855	chr10	89622573	89622574	KLLN	100144748	619	CGI	TRUE	FALSE	FALSE
cg26528551	chr10	131445415	131445416	MGMT	4255	179960	CGI	FALSE	TRUE	FALSE
cg27081107	chr10	438661	438662	PRR26	414235	-257225	CGI	FALSE	TRUE	FALSE
cg27131510	chr10	124668884	124668885	FAM24A	118670	-1331	Non-CGI	TRUE	FALSE	FALSE
cg27196695	chr10	134571377	134571378	NKX6-2	84504	28158	CGI	FALSE	TRUE	FALSE
cg27339291	chr10	119806460	119806461	CASC2	255082	127	CGI	TRUE	FALSE	FALSE
cg27457323	chr10	62538048	62538049	CDK1	983	-39	CGI	TRUE	FALSE	FALSE
cg27653394	chr10	102758893	102758894	LZTS2	84445	2028	CGI	TRUE	TRUE	FALSE
cg00400096	chr11	41644529	41644530	LRRC4C	57689	-163205	CGI	FALSE	FALSE	TRUE
cg00861580	chr11	47788813	47788814	FNBP4	23360	178	CGI	TRUE	FALSE	FALSE
cg01173611	chr11	59436746	59436747	PATL1	219988	-234	CGI	TRUE	FALSE	FALSE
cg01260103	chr11	68609203	68609204	CPT1A	1374	194	CGI	FALSE	TRUE	FALSE
cg01470704	chr11	33060762	33060763	TCP11L1	55346	-199	CGI	TRUE	FALSE	FALSE
cg01666550	chr11	68183850	68183851	PPP6R3	55291	-44334	CGI	FALSE	TRUE	FALSE
cg01816411	chr11	57099303	57099304	SSRP1	6749	4046	CGI-N-Shelf	FALSE	TRUE	FALSE
cg01925891	chr11	64310508	64310509	SLC22A11	55867	-12588	CGI	FALSE	FALSE	TRUE
cg02274108	chr11	67188696	67188697	PPP1CA	5499	-41	CGI	TRUE	TRUE	FALSE
cg02510267	chr11	20690807	20690808	NELL1	4745	-308	CGI	TRUE	FALSE	FALSE
cg02917596	chr11	61447834	61447835	DAGLA	747	-69	CGI	TRUE	FALSE	FALSE
cg02939090	chr11	77348733	77348734	CLNS1A	1207	116	CGI	TRUE	FALSE	FALSE
cg02972788	chr11	124713125	124713126	ROBO3	64221	-22178	CGI	FALSE	FALSE	TRUE
cg03389662	chr11	67007586	67007587	ADRBK1	156	-26317	CGI	TRUE	TRUE	FALSE
cg03416422	chr11	111807767	111807768	DIXDC1	85458	7181	CGI	TRUE	TRUE	FALSE
cg03423112	chr11	66335975	66335976	CTSF	8722	70	CGI	TRUE	FALSE	FALSE
cg03595792	chr11	74109608	74109609	PGM2L1	283209	-105	CGI	TRUE	FALSE	FALSE
cg03641748	chr11	6440808	6440809	APBB1	322	-163	CGI-S-Shore	TRUE	FALSE	FALSE
cg03750407	chr11	67159770	67159771	RAD9A	5883	346	CGI	TRUE	TRUE	FALSE
cg03761846	chr11	93474852	93474853	C11orf54	28970	58	CGI	TRUE	FALSE	FALSE
cg03776857	chr11	57995971	57995972	OR10Q1	219960	417	CGI	TRUE	FALSE	FALSE
cg03917623	chr11	73472500	73472501	RAB6A	5870	-298	CGI-S-Shore	TRUE	FALSE	FALSE
cg03965764	chr11	45248109	45248110	SYT13	57586	59773	CGI	FALSE	FALSE	TRUE
cg03982544	chr11	17036042	17036043	PLEKHA7	144100	-78	CGI	TRUE	FALSE	FALSE
cg04024572	chr11	65657704	65657705	CCDC85B	11007	-169	CGI	TRUE	FALSE	FALSE
cg04237662	chr11	117049512	117049513	SIDT2	51092	-425	CGI	TRUE	FALSE	FALSE
cg04370142	chr11	62192342	62192343	SCGB1A1	7356	5834	CGI	FALSE	FALSE	TRUE
cg04433129	chr11	62432769	62432770	METTL12	751071	-8	CGI	TRUE	TRUE	FALSE
cg04557774	chr11	73472407	73472408	RAB6A	5870	-205	CGI	TRUE	FALSE	FALSE
cg04701106	chr11	118955609	118955610	HMBS	3145	21	CGI-N-Shore	TRUE	FALSE	FALSE
cg04829746	chr11	58346531	58346532	ZFP91-CNTF	386607	-54	CGI	TRUE	FALSE	FALSE
cg05233289	chr11	64120728	64120729	RPS6KA4	8986	-5895	CGI	TRUE	TRUE	FALSE
cg05342320	chr11	64851802	64851803	ZFPL1	7542	107	CGI	TRUE	FALSE	FALSE
cg05519310	chr11	66627619	66627620	LRFN4	78999	2742	CGI	FALSE	TRUE	FALSE
cg05701403	chr11	16947551	16947552	PLEKHA7	144100	88410	CGI	FALSE	TRUE	FALSE
[truncated: 9,626 more rows]
