# Supplementary material for: H3K4me1 marks DNA regions hypomethylated during aging in human stem and differentiated cells
Source: HighWire-hosted journal article supplement (doi:10.1101/gr.169011.113), 2014-09-30
Supplement: Supplemental_Table_19.xlsx [file Supplemental_Table_19.xlsx]

## Sheet: ST19
Supplemental Table 19: List of CpG sites where the decrease in Euclidean distance (ED) (> 2-fold) with age was higher than could be accounted for solely by interindividual variability
Target ID	Chromosome	start	end	nearest.gene	nearest.gene.id	disttotss	hmm.cpgi	prom.reg	intra.reg	inter.reg
cg00173405	chr1	1335424	1335425	LOC148413	148413	513	CGI	TRUE	TRUE	FALSE
cg00347563	chr1	78511600	78511601	GIPC2	54810	10	CGI	TRUE	FALSE	FALSE
cg00545681	chr1	95007593	95007594	F3	2152	-179	CGI	TRUE	FALSE	FALSE
cg00660251	chr1	89991016	89991017	LRRC8B	23507	618	CGI	FALSE	TRUE	FALSE
cg00687095	chr1	176176785	176176786	RFWD2	64326	-414	CGI	TRUE	FALSE	FALSE
cg00757789	chr1	27560710	27560711	WDTC1	23038	-295	CGI-N-Shore	TRUE	FALSE	FALSE
cg00776782	chr1	12677088	12677089	DHRS3	9249	730	CGI	TRUE	TRUE	FALSE
cg00903998	chr1	216897293	216897294	USH2A	7399	-300554	CGI-S-Shore	TRUE	TRUE	FALSE
cg00918422	chr1	11115051	11115052	SRM	6723	5038	CGI-S-Shore	FALSE	TRUE	FALSE
cg00953309	chr1	16460784	16460785	EPHA2	1969	21796	CGI	FALSE	TRUE	FALSE
cg00962913	chr1	179712281	179712282	FAM163A	148753	15365	CGI	TRUE	TRUE	FALSE
cg01058717	chr1	1487068	1487069	TMEM240	339453	-11327	CGI-N-Shore	FALSE	TRUE	FALSE
cg01420426	chr1	41832032	41832033	EDN2	1907	118310	CGI-N-Shore	FALSE	FALSE	TRUE
cg01423964	chr1	111217575	111217576	KCNA3	3738	78	CGI	TRUE	FALSE	FALSE
cg01434197	chr1	153508553	153508554	S100A6	6277	162	CGI	TRUE	FALSE	FALSE
cg01553584	chr1	224400672	224400673	DEGS1	8560	29761	Non-CGI	FALSE	FALSE	TRUE
cg01576340	chr1	9970659	9970660	CTNNBIP1	56998	-342	CGI	TRUE	FALSE	FALSE
cg01780466	chr1	145477253	145477254	LIX1L	128077	167	CGI	TRUE	FALSE	FALSE
cg01799338	chr1	36348937	36348938	2001-08-01	26523	13527	CGI	TRUE	TRUE	FALSE
cg01970427	chr1	2006896	2006897	PRKCZ	5590	24986	CGI	FALSE	TRUE	FALSE
cg01979157	chr1	2161013	2161014	SKI	6497	878	CGI	TRUE	FALSE	FALSE
cg02096887	chr1	10699831	10699832	CASZ1	54897	156874	CGI	FALSE	TRUE	FALSE
cg02151754	chr1	202679191	202679192	SYT2	127833	358	CGI	FALSE	TRUE	FALSE
cg02331143	chr1	42128043	42128044	EDN2	1907	-177698	CGI	FALSE	TRUE	FALSE
cg02392774	chr1	53164140	53164141	SELRC1	65260	-101	CGI	TRUE	FALSE	FALSE
cg02583234	chr1	22157799	22157800	LDLRAD2	401944	19040	Non-CGI	TRUE	TRUE	FALSE
cg02769781	chr1	1713676	1713677	NADK	65220	-2167	CGI	FALSE	FALSE	TRUE
cg02847589	chr1	22778394	22778395	ZBTB40	9923	49	CGI	TRUE	FALSE	FALSE
cg02901753	chr1	200117055	200117056	FAM58BP	339521	-65599	CGI	FALSE	TRUE	FALSE
cg03001875	chr1	234614834	234614835	TARBP1	6894	13	CGI	TRUE	FALSE	FALSE
cg03129717	chr1	87795122	87795123	LMO4	8543	970	CGI	FALSE	TRUE	FALSE
cg03470088	chr1	24513939	24513940	IFNLR1	163702	-173	CGI	TRUE	FALSE	FALSE
cg03861428	chr1	17380702	17380703	SDHB	6390	-36	CGI	TRUE	FALSE	FALSE
cg03901660	chr1	221050459	221050460	HLX	3142	-2282	CGI	FALSE	FALSE	TRUE
cg03902160	chr1	29586660	29586661	PTPRU	10076	23631	CGI	FALSE	TRUE	FALSE
cg03957204	chr1	154377970	154377971	IL6R	3570	300	CGI	TRUE	FALSE	FALSE
cg03970039	chr1	6550645	6550646	TNFRSF25	8718	-24389	CGI	TRUE	TRUE	FALSE
cg03971828	chr1	25071582	25071583	CLIC4	25932	-176	CGI	TRUE	FALSE	FALSE
cg03987003	chr1	145516092	145516093	GNRHR2	114814	-15	CGI	TRUE	FALSE	FALSE
cg04025728	chr1	6259688	6259689	RPL22	6146	-8	CGI	TRUE	FALSE	FALSE
cg04158115	chr1	36863305	36863306	LSM10	84967	186	CGI	FALSE	TRUE	FALSE
cg04161137	chr1	22974180	22974181	C1QC	714	4061	CGI	FALSE	TRUE	FALSE
cg04307831	chr1	246729669	246729670	CNST	163882	29	CGI	TRUE	FALSE	FALSE
cg04490108	chr1	150337032	150337033	RPRD2	23248	41	CGI	TRUE	FALSE	FALSE
cg04509266	chr1	207991597	207991598	LOC148696	148696	-125	CGI-N-Shore	TRUE	TRUE	FALSE
cg04707332	chr1	119528018	119528019	TBX15	6913	4159	CGI	FALSE	TRUE	FALSE
cg04875476	chr1	156720919	156720920	MRPL24	79590	-9995	CGI	FALSE	TRUE	FALSE
cg04933208	chr1	29586414	29586415	PTPRU	10076	23385	CGI	FALSE	TRUE	FALSE
cg04944491	chr1	245938453	245938454	KIF26B	55083	620165	CGI	FALSE	TRUE	FALSE
cg05035248	chr1	1020820	1020821	RNF223	401934	-11132	CGI-S-Shore	FALSE	TRUE	FALSE
cg05043431	chr1	229406934	229406935	RAB4A	5867	54	CGI	TRUE	FALSE	FALSE
cg05048680	chr1	1342566	1342567	MRPL20	55052	125	CGI	TRUE	FALSE	FALSE
cg05264881	chr1	15375148	15375149	TMEM51-AS1	200197	103810	CGI	FALSE	TRUE	FALSE
cg05302064	chr1	5922686	5922687	MIR4689	100616421	113	CGI-N-Shore	FALSE	FALSE	TRUE
cg05388468	chr1	193074664	193074665	GLRX2	51022	578	CGI	TRUE	TRUE	FALSE
cg05625889	chr1	25944100	25944101	MAN1C1	57134	140	CGI	TRUE	FALSE	FALSE
cg05640069	chr1	94312038	94312039	MIR760	100126348	-348	CGI	TRUE	TRUE	FALSE
cg05660803	chr1	212459290	212459291	PPP2R5A	5525	410	CGI	TRUE	FALSE	FALSE
cg05787193	chr1	84543369	84543370	PRKACB	5567	-374	CGI	TRUE	FALSE	FALSE
cg05923687	chr1	63795711	63795712	FOXD3	27022	6980	CGI	FALSE	FALSE	TRUE
cg05930370	chr1	224545104	224545105	CNIH4	29097	508	CGI	FALSE	TRUE	FALSE
cg06033579	chr1	12662841	12662842	DHRS3	9249	14977	Non-CGI	FALSE	TRUE	FALSE
cg06078874	chr1	231114777	231114778	ARV1	64801	-44	CGI	TRUE	FALSE	FALSE
cg06128920	chr1	1447374	1447375	ATAD3A	55210	-147	CGI	TRUE	FALSE	FALSE
cg06512514	chr1	32479141	32479142	KHDRBS1	10657	-348	CGI	TRUE	FALSE	FALSE
cg06515144	chr1	179545091	179545092	NPHS2	7827	-6	CGI	TRUE	FALSE	FALSE
cg06527865	chr1	234746497	234746498	IRF2BP2	359948	-1225	CGI	TRUE	FALSE	FALSE
cg06632353	chr1	11322381	11322382	MTOR	2475	225	CGI	FALSE	TRUE	FALSE
cg06639788	chr1	100503523	100503524	HIAT1	64645	-264	CGI	TRUE	FALSE	FALSE
cg06650698	chr1	3558138	3558139	WRAP73	49856	8531	CGI	FALSE	TRUE	FALSE
cg06755661	chr1	43919542	43919543	HYI	81888	116	CGI	TRUE	TRUE	FALSE
cg06796869	chr1	228471009	228471010	OBSCN	84033	75147	CGI	FALSE	TRUE	FALSE
cg06875189	chr1	111682593	111682594	DRAM2	128338	243	CGI	TRUE	TRUE	FALSE
cg06940705	chr1	14924712	14924713	KAZN	23254	-499	CGI	TRUE	FALSE	FALSE
cg07010359	chr1	20209420	20209421	OTUD3	23252	531	CGI	FALSE	TRUE	FALSE
cg07011357	chr1	92949813	92949814	GFI1	2672	2618	CGI	TRUE	TRUE	FALSE
cg07017209	chr1	220263177	220263178	BPNT1	10380	12	CGI	TRUE	TRUE	FALSE
cg07151560	chr1	111991897	111991898	WDR77	79084	-66	CGI	TRUE	TRUE	FALSE
cg07152177	chr1	231004507	231004508	C1orf198	84886	826	CGI	TRUE	TRUE	FALSE
cg07236781	chr1	25291041	25291042	RUNX3	864	569	CGI	TRUE	TRUE	FALSE
cg07346851	chr1	160370286	160370287	VANGL2	57216	54	CGI	TRUE	TRUE	FALSE
cg07367222	chr1	3053584	3053585	MIR4251	100422968	9044	CGI-S-Shore	FALSE	TRUE	FALSE
cg07550869	chr1	3302283	3302284	ARHGEF16	27237	-68862	CGI-N-Shore	FALSE	TRUE	FALSE
cg07590482	chr1	22109175	22109176	USP48	84196	511	CGI	FALSE	TRUE	FALSE
cg07790615	chr1	237205174	237205175	RYR2	6262	-526	CGI	TRUE	FALSE	FALSE
cg07962812	chr1	183441443	183441444	SMG7	9887	-61	CGI	TRUE	FALSE	FALSE
cg08128274	chr1	206832043	206832044	DYRK3	8444	23161	Non-CGI	FALSE	TRUE	FALSE
cg08138435	chr1	212874634	212874635	BATF3	55509	-1306	CGI-S-Shore	TRUE	FALSE	FALSE
cg08241939	chr1	204700816	204700817	LRRN2	10446	-46218	Non-CGI	FALSE	FALSE	TRUE
cg08261858	chr1	246887303	246887304	SCCPDH	51097	-73	CGI-N-Shore	TRUE	FALSE	FALSE
cg08275633	chr1	11751631	11751632	MAD2L2	10459	45	CGI	TRUE	FALSE	FALSE
cg08468375	chr1	173887101	173887102	SERPINC1	462	-584	Non-CGI	TRUE	FALSE	FALSE
cg08479976	chr1	90286333	90286334	LRRC8D	55144	-238	CGI	TRUE	FALSE	FALSE
cg08706837	chr1	37940090	37940091	ZC3H12A	80149	-27	CGI	TRUE	FALSE	FALSE
cg08748615	chr1	39957298	39957299	BMP8A	353500	-18	CGI	TRUE	FALSE	FALSE
cg08831354	chr1	155145252	155145253	TRIM46	80128	-167	CGI-N-Shore	TRUE	TRUE	FALSE
cg08935021	chr1	28832541	28832542	RCC1	1104	85	CGI	TRUE	FALSE	FALSE
cg09030113	chr1	162531726	162531727	UAP1	6675	429	CGI	FALSE	TRUE	FALSE
cg09135754	chr1	2863146	2863147	ACTRT2	140625	-74898	CGI-N-Shore	FALSE	FALSE	TRUE
cg09179249	chr1	10732900	10732901	CASZ1	54897	123805	CGI	FALSE	TRUE	FALSE
cg09367891	chr1	107599246	107599247	PRMT6	55170	-19	CGI	TRUE	FALSE	FALSE
cg09515767	chr1	47903385	47903386	FOXD2	2306	1695	CGI	TRUE	FALSE	FALSE
cg09754868	chr1	16175872	16175873	FLJ37453	729614	-1229	CGI	TRUE	TRUE	FALSE
cg09818520	chr1	151162600	151162601	VPS72	6944	38	CGI	TRUE	FALSE	FALSE
cg09867230	chr1	154972398	154972399	ZBTB7B	51043	-2706	CGI	FALSE	FALSE	TRUE
cg09933215	chr1	31360239	31360240	SDC3	9672	21239	Non-CGI	FALSE	TRUE	FALSE
cg09935045	chr1	57111199	57111200	PRKAA2	5563	208	CGI	FALSE	TRUE	FALSE
cg10053149	chr1	28908509	28908510	SNHG12	85028	-125	CGI	TRUE	FALSE	FALSE
cg10057528	chr1	2116747	2116748	C1orf86	199990	22423	CGI	FALSE	TRUE	FALSE
cg10059687	chr1	6526129	6526130	TNFRSF25	8718	124	CGI-N-Shore	TRUE	FALSE	FALSE
cg10130860	chr1	43124230	43124231	PPIH	10465	181	CGI	TRUE	TRUE	FALSE
cg10241147	chr1	26147310	26147311	MTFR1L	56181	912	CGI	TRUE	TRUE	FALSE
cg10241701	chr1	117113180	117113181	CD58	965	533	CGI	FALSE	TRUE	FALSE
cg10327320	chr1	26147299	26147300	MTFR1L	56181	901	CGI	TRUE	TRUE	FALSE
cg10390174	chr1	156675491	156675492	CRABP2	1382	115	CGI	TRUE	TRUE	FALSE
cg10390736	chr1	40420692	40420693	MFSD2A	84879	-90	CGI	TRUE	FALSE	FALSE
cg10519004	chr1	3314443	3314444	ARHGEF16	27237	-56702	CGI-S-Shore	FALSE	TRUE	FALSE
cg10522587	chr1	120166026	120166027	LINC00622	644242	-24111	CGI	FALSE	TRUE	FALSE
cg10574377	chr1	18908098	18908099	PAX7	5081	-49400	Non-CGI	FALSE	FALSE	TRUE
cg10588310	chr1	3332000	3332001	ARHGEF16	27237	-39145	CGI-S-Shore	FALSE	TRUE	FALSE
cg10701282	chr1	234350003	234350004	MIR4671	100616380	-92208	CGI	TRUE	TRUE	FALSE
cg10983544	chr1	248020377	248020378	TRIM58	25893	-122	CGI-N-Shore	TRUE	FALSE	FALSE
cg10987926	chr1	1490906	1490907	TMEM240	339453	-15165	CGI-S-Shore	FALSE	TRUE	FALSE
cg11522610	chr1	106623429	106623430	PRMT6	55170	-975836	CGI-N-Shore	FALSE	FALSE	TRUE
cg11528978	chr1	47134349	47134350	ATPAF1	64756	-249	CGI	TRUE	TRUE	FALSE
cg11594415	chr1	171454668	171454669	PRRC2C	23215	1	CGI	TRUE	FALSE	FALSE
cg11653406	chr1	40367713	40367714	MYCL1	4610	-25	CGI	TRUE	FALSE	FALSE
cg11661340	chr1	222628632	222628633	HHIPL2	79802	92810	Non-CGI	FALSE	FALSE	TRUE
cg11785652	chr1	92949337	92949338	GFI1	2672	3094	CGI	TRUE	TRUE	FALSE
cg11806528	chr1	113051977	113051978	WNT2B	7482	41936	CGI	TRUE	TRUE	FALSE
cg11823253	chr1	213154553	213154554	VASH2	79805	30665	Non-CGI	FALSE	TRUE	FALSE
cg11836369	chr1	160254759	160254760	DCAF8	50717	180	CGI	FALSE	TRUE	FALSE
cg11857665	chr1	234745902	234745903	IRF2BP2	359948	-630	CGI	TRUE	FALSE	FALSE
cg11911250	chr1	155247191	155247192	HCN3	57657	-181	CGI	TRUE	TRUE	FALSE
cg11954479	chr1	92952196	92952197	GFI1	2672	235	CGI	TRUE	TRUE	FALSE
cg12073565	chr1	235530973	235530974	TBCE	6905	244	CGI	FALSE	TRUE	FALSE
cg12394377	chr1	24514218	24514219	IFNLR1	163702	-452	CGI	TRUE	FALSE	FALSE
cg12407421	chr1	19011016	19011017	PAX7	5081	53515	CGI-N-Shore	FALSE	TRUE	FALSE
cg12410370	chr1	43296526	43296527	CCDC23	374969	-13466	CGI	TRUE	TRUE	FALSE
cg12419308	chr1	110052464	110052465	AMIGO1	57463	-127	CGI	TRUE	FALSE	FALSE
cg12525822	chr1	91487036	91487037	ZNF644	84146	774	CGI	TRUE	TRUE	FALSE
cg12610061	chr1	40916055	40916056	ZFP69B	65243	280	CGI	TRUE	TRUE	FALSE
cg12646754	chr1	2574751	2574752	MMEL1	79258	-10269	CGI	FALSE	TRUE	FALSE
cg12804283	chr1	240569726	240569727	GREM2	64388	205734	CGI	FALSE	TRUE	FALSE
cg12909559	chr1	100435310	100435311	SLC35A3	23443	-228	CGI-N-Shore	TRUE	FALSE	FALSE
cg13233534	chr1	162531423	162531424	UAP1	6675	126	CGI	TRUE	FALSE	FALSE
cg13235288	chr1	155293343	155293344	RUSC1-AS1	284618	593	CGI	TRUE	TRUE	FALSE
cg13371836	chr1	840274	840275	LOC100130417	100130417	14541	CGI	FALSE	FALSE	TRUE
cg13371870	chr1	245286587	245286588	KIF26B	55083	-31698	Non-CGI	FALSE	TRUE	FALSE
cg13374701	chr1	27190088	27190089	SFN	2810	454	CGI	TRUE	TRUE	FALSE
cg13457165	chr1	40105079	40105080	HEYL	26508	267	CGI	FALSE	TRUE	FALSE
cg13572638	chr1	227173653	227173654	ADCK3	56997	89063	CGI	FALSE	TRUE	FALSE
cg13575252	chr1	1477616	1477617	TMEM240	339453	-1875	CGI	TRUE	TRUE	FALSE
cg13579901	chr1	167905492	167905493	DCAF6	55827	-303	CGI	TRUE	TRUE	FALSE
cg13689737	chr1	42383644	42383645	HIVEP3	59269	117950	CGI-N-Shore	FALSE	TRUE	FALSE
cg13841804	chr1	150207467	150207468	ANP32E	81611	1035	CGI	TRUE	TRUE	FALSE
cg13898470	chr1	6688607	6688608	THAP3	90326	3681	CGI	FALSE	TRUE	FALSE
cg13935437	chr1	19600673	19600674	AKR7L	246181	-104	CGI	TRUE	FALSE	FALSE
cg14011415	chr1	41249513	41249514	KCNQ4	9132	-169	CGI	TRUE	FALSE	FALSE
cg14156405	chr1	241520286	241520287	RGS7	6000	190	CGI	TRUE	FALSE	FALSE
cg14160632	chr1	244615247	244615248	ADSS	159	187	CGI	TRUE	FALSE	FALSE
cg14609025	chr1	119550983	119550984	TBX15	6913	-18803	CGI	FALSE	FALSE	TRUE
cg14654194	chr1	38156235	38156236	C1orf109	54955	1651	CGI	TRUE	TRUE	FALSE
cg14844172	chr1	182758764	182758765	NPL	80896	179	CGI	TRUE	FALSE	FALSE
cg14985478	chr1	86174138	86174139	ZNHIT6	54680	-21	CGI	TRUE	FALSE	FALSE
cg15030799	chr1	1052094	1052095	C1orf159	54991	-357	CGI	TRUE	FALSE	FALSE
cg15108705	chr1	233749544	233749545	KCNK1	3775	-204	CGI	TRUE	FALSE	FALSE
cg15208524	chr1	10270712	10270713	KIF1B	23095	-50	CGI	TRUE	FALSE	FALSE
cg15293611	chr1	182759062	182759063	NPL	80896	477	CGI	FALSE	TRUE	FALSE
cg15328582	chr1	168195103	168195104	SFT2D2	375035	-150	CGI	TRUE	FALSE	FALSE
cg15395193	chr1	145516314	145516315	PEX11B	8799	148	CGI	TRUE	FALSE	FALSE
cg15501415	chr1	57107842	57107843	PRKAA2	5563	-3146	CGI-N-Shelf	FALSE	FALSE	TRUE
cg15545624	chr1	61516555	61516556	NFIA	4774	-26389	CGI	FALSE	FALSE	TRUE
cg15545739	chr1	9100316	9100317	SLC2A7	155184	-13911	CGI	FALSE	TRUE	FALSE
cg15576900	chr1	44883697	44883698	RNF220	55182	12736	CGI	FALSE	TRUE	FALSE
cg15602298	chr1	157670825	157670826	FCRL3	115352	-49	Non-CGI	TRUE	FALSE	FALSE
cg15714196	chr1	45241175	45241176	RPS8	6202	-69	CGI	TRUE	FALSE	FALSE
cg15803895	chr1	227923227	227923228	JMJD4	65094	-114	CGI	TRUE	TRUE	FALSE
cg15823064	chr1	87794194	87794195	LMO4	8543	42	CGI	TRUE	FALSE	FALSE
cg15831200	chr1	110765724	110765725	KCNC4	3749	12387	CGI	FALSE	TRUE	FALSE
cg15993652	chr1	1145618	1145619	TNFRSF18	8784	-3528	CGI	FALSE	FALSE	TRUE
cg16008440	chr1	161983790	161983791	OLFML2B	25903	9852	Non-CGI	FALSE	TRUE	FALSE
cg16011679	chr1	85725395	85725396	C1orf52	148423	-39	CGI	TRUE	FALSE	FALSE
cg16031338	chr1	2430136	2430137	PLCH2	9651	22381	CGI-S-Shore	TRUE	TRUE	FALSE
cg16045498	chr1	120490955	120490956	ADAM30	11085	-51807	Non-CGI	FALSE	TRUE	FALSE
cg16049364	chr1	244080978	244080979	LOC339529	339529	273	CGI	FALSE	TRUE	FALSE
cg16290123	chr1	6663532	6663533	KLHL21	9903	-602	CGI	TRUE	FALSE	FALSE
cg16298481	chr1	89989717	89989718	LRRC8B	23507	-678	CGI-N-Shore	TRUE	FALSE	FALSE
cg16410706	chr1	212873963	212873964	BATF3	55509	-635	CGI	TRUE	FALSE	FALSE
cg16417258	chr1	919731	919732	C1orf170	84808	-2257	CGI-S-Shore	FALSE	FALSE	TRUE
cg16518825	chr1	40625852	40625853	RLF	6018	-1187	CGI-N-Shore	TRUE	FALSE	FALSE
cg16555184	chr1	149982714	149982715	OTUD7B	56957	-27	CGI	TRUE	FALSE	FALSE
cg16600927	chr1	200708027	200708028	CAMSAP2	23271	-657	CGI	TRUE	FALSE	FALSE
cg16674327	chr1	47799633	47799634	CMPK1	51727	163	CGI	TRUE	FALSE	FALSE
cg16987101	chr1	226297828	226297829	H3F3AP4	440926	46149	CGI	FALSE	FALSE	TRUE
cg17013432	chr1	40506131	40506132	CAP1	10487	-122	CGI	TRUE	FALSE	FALSE
cg17031493	chr1	186343755	186343756	TPR	7175	1107	CGI	TRUE	TRUE	FALSE
cg17075937	chr1	10532696	10532697	DFFA	1676	-82	CGI	TRUE	FALSE	FALSE
cg17172773	chr1	150980817	150980818	FAM63A	55793	35	CGI	TRUE	FALSE	FALSE
cg17211447	chr1	10490667	10490668	APITD1-CORT	100526739	507	CGI	TRUE	TRUE	FALSE
cg17257175	chr1	155163542	155163543	MUC1	4582	-835	CGI	TRUE	FALSE	FALSE
cg17498841	chr1	235667974	235667975	B3GALNT2	148789	-192	CGI	TRUE	FALSE	FALSE
cg17498856	chr1	1457042	1457043	ATAD3A	55210	9518	CGI-S-Shore	FALSE	TRUE	FALSE
cg17515966	chr1	6265894	6265895	RNF207	388591	-293	CGI	TRUE	FALSE	FALSE
cg17591741	chr1	206316396	206316397	CTSE	1510	-1061	Non-CGI	TRUE	FALSE	FALSE
cg17724171	chr1	6240267	6240268	CHD5	26038	-72	CGI	TRUE	FALSE	FALSE
cg17748167	chr1	31769917	31769918	ZCCHC17	51538	74	CGI	TRUE	FALSE	FALSE
cg17799654	chr1	114444754	114444755	AP4B1	10717	2985	CGI-N-Shelf	TRUE	TRUE	FALSE
cg17859048	chr1	151170906	151170907	PIP5K1A	8394	-113	CGI	TRUE	FALSE	FALSE
cg17929645	chr1	245082179	245082180	EFCAB2	84288	-50990	CGI	FALSE	FALSE	TRUE
cg17969377	chr1	235530852	235530853	TBCE	6905	123	CGI	TRUE	TRUE	FALSE
cg18018245	chr1	167906535	167906536	MPC2	25874	-227	CGI	TRUE	TRUE	FALSE
cg18194393	chr1	16767185	16767186	NECAP2	55707	17	CGI	TRUE	FALSE	FALSE
cg18219212	chr1	16162653	16162654	SPEN	23013	-11704	CGI	FALSE	TRUE	FALSE
cg18227923	chr1	52870174	52870175	ORC1	4998	-30	CGI	TRUE	FALSE	FALSE
cg18237510	chr1	153919190	153919191	DENND4B	9909	-35	CGI	TRUE	FALSE	FALSE
cg18271913	chr1	205561852	205561853	MFSD4	148808	23739	CGI	FALSE	TRUE	FALSE
cg18375860	chr1	237205409	237205410	RYR2	6262	-291	CGI	TRUE	FALSE	FALSE
cg18534318	chr1	156829287	156829288	INSRR	3645	-574	CGI	TRUE	TRUE	FALSE
cg18855356	chr1	16957483	16957484	CROCCP2	84809	13693	CGI-N-Shore	TRUE	TRUE	FALSE
cg18941796	chr1	17764175	17764176	RCC2	55920	2073	CGI	FALSE	TRUE	FALSE
cg19308497	chr1	160147442	160147443	CASQ1	844	-12841	Non-CGI	TRUE	TRUE	FALSE
cg19408915	chr1	172412924	172412925	PIGC	5279	304	CGI	TRUE	TRUE	FALSE
cg19624799	chr1	212588350	212588351	TMEM206	55248	-82	CGI	TRUE	FALSE	FALSE
cg19694957	chr1	1907658	1907659	KIAA1751	85452	27616	CGI	FALSE	TRUE	FALSE
cg19720805	chr1	156470719	156470720	MEF2D	4209	-189	CGI	TRUE	FALSE	FALSE
cg19811123	chr1	228401572	228401573	OBSCN	84033	5710	CGI	TRUE	TRUE	FALSE
cg19915020	chr1	10490985	10490986	APITD1-CORT	100526739	825	CGI	TRUE	TRUE	FALSE
cg20153751	chr1	10595970	10595971	PEX14	5195	60966	CGI	FALSE	TRUE	FALSE
cg20156999	chr1	249154285	249154286	ZNF692	55657	-969	CGI-S-Shore	TRUE	FALSE	FALSE
cg20288000	chr1	10735169	10735170	CASZ1	54897	121536	CGI-S-Shore	FALSE	TRUE	FALSE
cg20318608	chr1	179712591	179712592	FAM163A	148753	15675	CGI	FALSE	TRUE	FALSE
cg20457732	chr1	71172486	71172487	CTH	1491	295584	CGI-S-Shore	FALSE	TRUE	FALSE
cg20703523	chr1	16302590	16302591	ZBTB17	7709	35	CGI	TRUE	FALSE	FALSE
cg20704560	chr1	10698313	10698314	CASZ1	54897	158392	CGI-N-Shore	FALSE	TRUE	FALSE
cg20706316	chr1	8398600	8398601	SLC45A1	50651	14209	CGI-N-Shore	FALSE	TRUE	FALSE
cg20781819	chr1	173837197	173837198	ZBTB37	84614	-21	CGI	TRUE	FALSE	FALSE
cg20804700	chr1	85462939	85462940	MCOLN2	255231	-142	CGI	TRUE	FALSE	FALSE
cg20823455	chr1	120166605	120166606	ZNF697	90874	23783	CGI	FALSE	TRUE	FALSE
cg20846212	chr1	236444798	236444799	ERO1LB	56605	539	CGI	FALSE	TRUE	FALSE
cg20961605	chr1	156571221	156571222	GPATCH4	54865	56	CGI	TRUE	FALSE	FALSE
cg20971527	chr1	8921294	8921295	ENO1-AS1	100505975	-17598	Non-CGI	FALSE	TRUE	FALSE
cg21214613	chr1	16344536	16344537	CLCNKA	1187	-832	CGI	TRUE	TRUE	FALSE
cg21963643	chr1	181451911	181451912	CACNA1E	777	-773	CGI	TRUE	FALSE	FALSE
cg22024145	chr1	87170575	87170576	SH3GLB1	51100	321	CGI	TRUE	FALSE	FALSE
cg22063056	chr1	109505929	109505930	CLCC1	23155	180	CGI	FALSE	TRUE	FALSE
cg22237459	chr1	206680720	206680721	RASSF5	83593	-157	CGI	TRUE	FALSE	FALSE
cg22358708	chr1	185126161	185126162	SWT1	54823	-29	CGI	TRUE	FALSE	FALSE
cg22514764	chr1	243637838	243637839	MIR4677	100616343	128359	CGI	FALSE	TRUE	FALSE
cg22693570	chr1	55224579	55224580	PARS2	25973	5645	Non-CGI	TRUE	TRUE	FALSE
cg22817650	chr1	193191405	193191406	B3GALT2	8707	-35661	Non-CGI	FALSE	TRUE	FALSE
cg22821908	chr1	38510522	38510523	POU3F1	5453	1926	CGI	TRUE	FALSE	FALSE
cg22868433	chr1	150208670	150208671	ANP32E	81611	-165	CGI	TRUE	FALSE	FALSE
cg23021241	chr1	44679211	44679212	DMAP1	55929	85	CGI	TRUE	TRUE	FALSE
cg23053573	chr1	26662567	26662568	UBXN11	91544	-17810	CGI	FALSE	TRUE	FALSE
cg23056823	chr1	180881583	180881584	KIAA1614	57710	-728	CGI	TRUE	FALSE	FALSE
cg23097696	chr1	156308121	156308122	CCT3	7203	83	CGI	TRUE	TRUE	FALSE
cg23110891	chr1	94344782	94344783	DNTTIP2	30836	-19	CGI	TRUE	FALSE	FALSE
cg23162821	chr1	231664172	231664173	TSNAX-DISC1	100303453	-225	CGI	TRUE	FALSE	FALSE
cg23162904	chr1	112298170	112298171	DDX20	11218	-18	CGI	TRUE	TRUE	FALSE
cg23219859	chr1	50799316	50799317	DMRTA2	63950	89801	CGI	FALSE	FALSE	TRUE
cg23230478	chr1	6360620	6360621	GPR153	387509	-39584	CGI-N-Shore	FALSE	TRUE	FALSE
cg23258881	chr1	150123037	150123038	PLEKHO1	51177	1269	CGI	FALSE	TRUE	FALSE
cg23272189	chr1	9883969	9883970	CLSTN1	22883	579	CGI	TRUE	FALSE	FALSE
cg23645476	chr1	110282472	110282473	GSTM3	2947	1186	CGI	FALSE	TRUE	FALSE
cg23691733	chr1	944093	944094	ISG15	9636	-4752	CGI-S-Shore	FALSE	FALSE	TRUE
cg23922040	chr1	40367804	40367805	MYCL1	4610	-116	CGI	TRUE	FALSE	FALSE
cg23933399	chr1	1462973	1462974	TMEM240	339453	12765	CGI	FALSE	TRUE	FALSE
cg23987876	chr1	29562838	29562839	PTPRU	10076	-188	CGI	TRUE	FALSE	FALSE
cg24047689	chr1	6614587	6614588	NOL9	79707	69	CGI	TRUE	FALSE	FALSE
cg24054508	chr1	38273761	38273762	YRDC	79693	102	CGI	TRUE	FALSE	FALSE
cg24083324	chr1	214162604	214162605	PROX1	5629	1317	CGI	FALSE	TRUE	FALSE
cg24310460	chr1	33283384	33283385	YARS	8565	247	CGI	TRUE	TRUE	FALSE
cg24367016	chr1	168195398	168195399	SFT2D2	375035	142	CGI	FALSE	TRUE	FALSE
cg24485408	chr1	44679309	44679310	DMAP1	55929	183	CGI	TRUE	TRUE	FALSE
cg24514954	chr1	24104624	24104625	LOC100506963	100506963	161	CGI	TRUE	TRUE	FALSE
cg24541835	chr1	12651540	12651541	DHRS3	9249	26278	CGI-N-Shelf	FALSE	TRUE	FALSE
cg24545495	chr1	6149049	6149050	CHD5	26038	91143	CGI	FALSE	TRUE	FALSE
cg24598094	chr1	211753582	211753583	SLC30A1	7779	-1482	CGI-S-Shore	TRUE	FALSE	FALSE
cg24683561	chr1	154934703	154934704	PYGO2	90780	-444	CGI	TRUE	FALSE	FALSE
cg24851854	chr1	59042275	59042276	TACSTD2	4070	889	CGI	TRUE	FALSE	FALSE
cg25005345	chr1	33815686	33815687	MIR3605	100500853	-17592	CGI	TRUE	TRUE	FALSE
cg25008393	chr1	161087351	161087352	NIT1	4817	-509	CGI-N-Shore	TRUE	TRUE	FALSE
cg25022560	chr1	205782239	205782240	SLC41A1	254428	-77	CGI	TRUE	FALSE	FALSE
cg25115460	chr1	3607110	3607111	TP73	7161	37980	CGI-N-Shore	TRUE	TRUE	FALSE
cg25192855	chr1	209979283	209979284	IRF6	3664	235	CGI	FALSE	TRUE	FALSE
cg25310909	chr1	165738087	165738088	UCK2	7371	-58643	CGI	TRUE	TRUE	FALSE
cg25465019	chr1	87794181	87794182	LMO4	8543	29	CGI	TRUE	FALSE	FALSE
cg25613251	chr1	59249811	59249812	JUN	3725	-25	CGI	TRUE	FALSE	FALSE
cg25729585	chr1	203056475	203056476	MYOG	4656	-1097	CGI-S-Shore	TRUE	FALSE	FALSE
cg25754252	chr1	171711285	171711286	VAMP4	8674	92	CGI	TRUE	FALSE	FALSE
cg26017930	chr1	2232166	2232167	LOC100129534	100129534	51932	CGI	FALSE	TRUE	FALSE
cg26031954	chr1	2139327	2139328	C1orf86	199990	-154	CGI	TRUE	FALSE	FALSE
cg26146390	chr1	160068471	160068472	IGSF8	93185	145	CGI	TRUE	TRUE	FALSE
cg26151283	chr1	27481658	27481659	SLC9A1	6548	-206	CGI	TRUE	FALSE	FALSE
cg26188784	chr1	85039967	85039968	CTBS	1486	194	CGI	TRUE	FALSE	FALSE
cg26335527	chr1	155100185	155100186	EFNA1	1942	-162	CGI	TRUE	FALSE	FALSE
cg26404511	chr1	24229575	24229576	CNR2	1269	10240	CGI	FALSE	TRUE	FALSE
cg26602477	chr1	1476845	1476846	TMEM240	339453	-1104	CGI-S-Shore	TRUE	FALSE	FALSE
cg26784348	chr1	67520192	67520193	SLC35D1	23169	-111	CGI	TRUE	FALSE	FALSE
cg26823989	chr1	87380673	87380674	HS2ST1	9653	337	CGI	TRUE	FALSE	FALSE
cg27045062	chr1	155054711	155054712	LOC100505666	100505666	-18243	CGI	FALSE	TRUE	FALSE
cg27046936	chr1	78956847	78956848	PTGFR	5737	118	CGI	TRUE	FALSE	FALSE
cg27173245	chr1	2457999	2458000	PANK4	55229	34	CGI	TRUE	FALSE	FALSE
cg27312709	chr1	6202080	6202081	CHD5	26038	38112	CGI-N-Shore	FALSE	TRUE	FALSE
cg27449836	chr1	179846920	179846921	TOR1AIP2	163590	19	CGI	TRUE	FALSE	FALSE
cg27505684	chr1	174968509	174968510	CACYBP	27101	-60	CGI	TRUE	FALSE	FALSE
cg27573606	chr1	838379	838380	LOC100130417	100130417	16436	CGI	FALSE	FALSE	TRUE
cg00041467	chr2	122494276	122494277	MKI67IP	84365	225	CGI	FALSE	TRUE	FALSE
cg00074365	chr2	64088479	64088480	UGP2	7360	20380	Non-CGI	FALSE	TRUE	FALSE
cg00151788	chr2	99757758	99757759	C2orf15	150590	-425	CGI	TRUE	TRUE	FALSE
cg00326131	chr2	74668477	74668478	RTKN	6242	581	CGI	TRUE	TRUE	FALSE
cg00394494	chr2	167232645	167232646	SCN9A	6335	-147	CGI	TRUE	FALSE	FALSE
cg00497554	chr2	242255158	242255159	HDLBP	3069	-42	CGI	TRUE	TRUE	FALSE
cg00551617	chr2	152152581	152152582	NMI	9111	-6150	CGI	FALSE	FALSE	TRUE
cg00584636	chr2	220253109	220253110	DNPEP	23549	11618	CGI	TRUE	TRUE	FALSE
cg01044692	chr2	208490024	208490025	METTL21A	151194	39	CGI	TRUE	FALSE	FALSE
cg01111397	chr2	172967676	172967677	DLX2	1746	-197	CGI	TRUE	FALSE	FALSE
cg01270424	chr2	237078509	237078510	GBX2	2637	-1856	CGI-S-Shore	TRUE	FALSE	FALSE
cg01310600	chr2	96987238	96987239	ITPRIPL1	150771	-3822	CGI	FALSE	FALSE	TRUE
cg01351177	chr2	88991149	88991150	RPIA	22934	-25	CGI	TRUE	FALSE	FALSE
cg01376245	chr2	97426602	97426603	CNNM4	26504	-35	CGI	TRUE	FALSE	FALSE
cg01381678	chr2	197458093	197458094	HECW2	57520	-757	CGI	TRUE	FALSE	FALSE
cg01387102	chr2	238395125	238395126	MLPH	79083	71	CGI	TRUE	FALSE	FALSE
cg01417569	chr2	38152292	38152293	RMDN2	151393	-168	CGI	TRUE	FALSE	FALSE
cg01590699	chr2	238475313	238475314	PRLH	51052	95	CGI-S-Shelf	TRUE	FALSE	FALSE
cg01721569	chr2	66810570	66810571	MEIS1	4211	148037	CGI	FALSE	FALSE	TRUE
cg01741750	chr2	234160137	234160138	ATG16L1	55054	-78	CGI-N-Shore	TRUE	FALSE	FALSE
cg02066650	chr2	111435449	111435450	BUB1	699	233	CGI	FALSE	TRUE	FALSE
cg02424378	chr2	85360601	85360602	TCF7L1	83439	17	CGI	TRUE	FALSE	FALSE
cg02463494	chr2	160568812	160568813	BAZ2B	29994	132	CGI	TRUE	TRUE	FALSE
cg02469457	chr2	242254758	242254759	2002-09-01	4735	34	CGI	TRUE	TRUE	FALSE
cg02547025	chr2	30454275	30454276	LBH	81606	-120	CGI	TRUE	FALSE	FALSE
cg02639181	chr2	8978042	8978043	KIDINS220	57498	-286	CGI-S-Shore	TRUE	FALSE	FALSE
cg02766770	chr2	30372795	30372796	YPEL5	51646	3044	CGI-S-Shore	FALSE	TRUE	FALSE
cg02782622	chr2	69534307	69534308	GFPT1	2673	80077	CGI	FALSE	FALSE	TRUE
cg02783887	chr2	660856	660857	TMEM18	129787	16581	CGI	FALSE	FALSE	TRUE
cg02806927	chr2	152266364	152266365	RIF1	55183	-31	CGI	TRUE	FALSE	FALSE
cg02949469	chr2	219135266	219135267	PNKD	25953	150	CGI	TRUE	FALSE	FALSE
cg03065822	chr2	152266375	152266376	RIF1	55183	-20	CGI	TRUE	FALSE	FALSE
cg03454669	chr2	10192479	10192480	KLF11	8462	8796	Non-CGI	FALSE	TRUE	FALSE
cg03554736	chr2	241719655	241719656	KIF1A	547	40068	CGI	FALSE	TRUE	FALSE
cg03832522	chr2	218898668	218898669	RUFY4	285180	-987	CGI	TRUE	FALSE	FALSE
cg03976667	chr2	84686045	84686046	SUCLG1	8802	539	CGI	FALSE	TRUE	FALSE
cg03979229	chr2	26364200	26364201	GAREML	150946	-31758	CGI	FALSE	FALSE	TRUE
cg04142144	chr2	24431211	24431212	FAM228A	653140	33679	CGI-N-Shelf	FALSE	TRUE	FALSE
cg04210100	chr2	9614471	9614472	IAH1	285148	-197	CGI	TRUE	FALSE	FALSE
cg04303908	chr2	241525392	241525393	CAPN10	11132	-739	CGI-N-Shore	TRUE	FALSE	FALSE
cg04318855	chr2	225906085	225906086	DOCK10	55619	1243	CGI	FALSE	TRUE	FALSE
cg04370088	chr2	99061575	99061576	INPP4A	3631	253	CGI	FALSE	TRUE	FALSE
cg04447741	chr2	95613630	95613631	LOC442028	442028	-542	Non-CGI	TRUE	FALSE	FALSE
cg04706655	chr2	97136556	97136557	NEURL3	93082	37288	CGI	FALSE	FALSE	TRUE
cg04707822	chr2	1821497	1821498	PXDN	7837	-73205	CGI	FALSE	TRUE	FALSE
cg04747308	chr2	118943906	118943907	INSIG2	51141	97855	CGI	FALSE	FALSE	TRUE
cg04789315	chr2	140505028	140505029	YY1P2	647012	850133	Non-CGI	FALSE	FALSE	TRUE
cg04983151	chr2	202483704	202483705	ALS2CR11	151254	199	CGI	TRUE	FALSE	FALSE
cg05259891	chr2	102866879	102866880	IL18R1	8809	-61081	CGI	FALSE	FALSE	TRUE
cg05310920	chr2	150186634	150186635	LYPD6	130574	134	CGI	TRUE	FALSE	FALSE
cg05417729	chr2	3307997	3307998	TSSC1	7260	73654	CGI	FALSE	TRUE	FALSE
cg05613116	chr2	27958722	27958723	MRPL33	9553	-35860	CGI-S-Shore	FALSE	FALSE	TRUE
cg05963605	chr2	10395189	10395190	HPCAL1	3241	-47849	CGI	FALSE	FALSE	TRUE
cg05977259	chr2	48133053	48133054	FBXO11	80204	-120	CGI	TRUE	FALSE	FALSE
cg05979879	chr2	64751188	64751189	AFTPH	54812	-249	CGI	TRUE	FALSE	FALSE
cg06006530	chr2	242608094	242608095	DTYMK	1841	18287	CGI	TRUE	TRUE	FALSE
cg06043190	chr2	42396882	42396883	EML4	27436	391	CGI	FALSE	TRUE	FALSE
cg06103677	chr2	242255270	242255271	HDLBP	3069	-154	CGI	TRUE	TRUE	FALSE
cg06227257	chr2	33824395	33824396	FAM98A	25940	-32	CGI	TRUE	FALSE	FALSE
cg06395280	chr2	242295608	242295609	FARP2	9855	-54	CGI	TRUE	FALSE	FALSE
cg06847283	chr2	217277082	217277083	SMARCAL1	50485	-53	CGI	TRUE	FALSE	FALSE
cg06950666	chr2	240101752	240101753	MGC16025	85009	15399	CGI-S-Shore	FALSE	TRUE	FALSE
cg07410044	chr2	71222186	71222187	TEX261	113419	-184	CGI	TRUE	FALSE	FALSE
cg07475885	chr2	85107320	85107321	TRABD2A	129293	930	CGI	FALSE	TRUE	FALSE
cg07592361	chr2	241496830	241496831	DUSP28	285193	-2639	CGI	FALSE	TRUE	FALSE
cg07802350	chr2	176956573	176956574	HOXD13	3239	-957	CGI	TRUE	FALSE	FALSE
cg07921384	chr2	220299740	220299741	SPEG	10290	39	CGI	TRUE	FALSE	FALSE
cg08192414	chr2	231276363	231276364	SP100	6672	-4506	CGI	FALSE	FALSE	TRUE
cg08235183	chr2	3646196	3646197	COLEC11	78989	3558	CGI-N-Shore	FALSE	TRUE	FALSE
cg08305872	chr2	210867207	210867208	RPE	6120	-143	CGI	TRUE	FALSE	FALSE
cg08407486	chr2	10588068	10588069	ODC1	4953	383	CGI	TRUE	TRUE	FALSE
cg08562543	chr2	27593465	27593466	SNX17	9784	101	CGI	TRUE	FALSE	FALSE
cg08714407	chr2	24307071	24307072	TP53I3	9540	1012	CGI	TRUE	TRUE	FALSE
cg09007600	chr2	202508229	202508230	TMEM237	65062	-4	CGI	TRUE	FALSE	FALSE
cg09248944	chr2	160654499	160654500	CD302	9936	265	CGI	FALSE	TRUE	FALSE
cg09344629	chr2	128471493	128471494	SFT2D3	84826	12895	CGI	FALSE	TRUE	FALSE
cg09368936	chr2	43019819	43019820	HAAO	23498	-67	CGI	TRUE	FALSE	FALSE
cg09588792	chr2	110371798	110371799	2010-09-01	151011	-14	CGI	TRUE	FALSE	FALSE
cg09731141	chr2	202507362	202507363	TMEM237	65062	860	CGI-N-Shore	TRUE	TRUE	FALSE
cg09974661	chr2	3642634	3642635	COLEC11	78989	-1	CGI	TRUE	FALSE	FALSE
cg10121586	chr2	175436504	175436505	GPR155	151556	-84692	CGI	FALSE	TRUE	FALSE
cg10188592	chr2	198364785	198364786	HSPE1-MOB4	100529241	63	CGI	TRUE	TRUE	FALSE
cg10245141	chr2	187559130	187559131	FAM171B	165215	340	CGI-S-Shore	TRUE	FALSE	FALSE
cg10315993	chr2	27008359	27008360	CENPA	1058	-521	CGI	TRUE	FALSE	FALSE
cg10397934	chr2	242868376	242868377	CXXC11	285093	56489	CGI	FALSE	FALSE	TRUE
cg10508058	chr2	522276	522277	TMEM18	129787	155161	CGI	FALSE	FALSE	TRUE
cg10535353	chr2	200323432	200323433	SATB2-AS1	150538	-9387	CGI	TRUE	TRUE	FALSE
cg10576499	chr2	80101315	80101316	MIR4264	100422888	-224829	CGI-N-Shore	FALSE	TRUE	FALSE
cg10633147	chr2	68384753	68384754	WDR92	116143	-74	CGI	TRUE	FALSE	FALSE
cg10785443	chr2	219827728	219827729	CDK5R2	8941	3329	CGI	FALSE	FALSE	TRUE
cg10884341	chr2	198365065	198365066	HSPD1	3329	-66	CGI	TRUE	FALSE	FALSE
cg11219022	chr2	166810277	166810278	TTC21B	79809	69	CGI	TRUE	FALSE	FALSE
cg11358945	chr2	157185891	157185892	NR4A2	4929	3394	CGI	TRUE	TRUE	FALSE
cg11549153	chr2	85132907	85132908	TMSB10	9168	143	CGI	FALSE	TRUE	FALSE
cg11770407	chr2	179315412	179315413	PRKRA	8575	544	CGI	TRUE	TRUE	FALSE
cg12224898	chr2	96971451	96971452	SNRNP200	23020	-143	CGI	TRUE	FALSE	FALSE
cg12302982	chr2	39471028	39471029	CDKL4	344387	-14354	CGI	FALSE	FALSE	TRUE
cg12492094	chr2	178937545	178937546	PDE11A	50940	35519	CGI	TRUE	TRUE	FALSE
cg12870876	chr2	203736356	203736357	ICA1L	130026	13	CGI	TRUE	FALSE	FALSE
cg13297150	chr2	74710531	74710532	CCDC142	84865	-173	CGI	TRUE	TRUE	FALSE
cg13320002	chr2	71222292	71222293	TEX261	113419	-290	CGI	TRUE	FALSE	FALSE
cg13407825	chr2	70314363	70314364	PCBP1-AS1	400960	-215	CGI	TRUE	FALSE	FALSE
cg13582873	chr2	207024197	207024198	NDUFS1	4719	44	CGI	TRUE	FALSE	FALSE
cg13788515	chr2	207139445	207139446	ZDBF2	57683	-76	CGI	TRUE	FALSE	FALSE
cg13811315	chr2	190518288	190518289	ASNSD1	54529	-7835	CGI	FALSE	FALSE	TRUE
cg13854983	chr2	136875315	136875316	CXCR4	7852	408	CGI	TRUE	TRUE	FALSE
cg14059350	chr2	219134997	219134998	AAMP	14	-103	CGI	TRUE	FALSE	FALSE
cg14238622	chr2	215674105	215674106	BARD1	580	321	CGI	FALSE	TRUE	FALSE
cg14239497	chr2	23679465	23679466	KLHL29	114818	71166	Non-CGI	FALSE	TRUE	FALSE
cg14330027	chr2	69614473	69614474	GFPT1	2673	-86	CGI	TRUE	FALSE	FALSE
cg14657116	chr2	72359477	72359478	CYP26B1	56603	15484	CGI	FALSE	TRUE	FALSE
cg14900246	chr2	112655153	112655154	MERTK	10461	-1036	CGI	TRUE	FALSE	FALSE
cg15109933	chr2	73613564	73613565	ALMS1	7840	677	CGI	FALSE	TRUE	FALSE
cg15160709	chr2	72357937	72357938	CYP26B1	56603	17024	CGI-N-Shore	FALSE	TRUE	FALSE
cg15338159	chr2	106055507	106055508	FHL2	2274	-276	Non-CGI	TRUE	FALSE	FALSE
cg15459695	chr2	236403016	236403017	AGAP1	116987	282	CGI	TRUE	FALSE	FALSE
cg15506890	chr2	3487001	3487002	ADI1	55256	36347	CGI	FALSE	TRUE	FALSE
cg15696821	chr2	133013489	133013490	MIR663B	100313824	1162	CGI	FALSE	TRUE	FALSE
cg15989294	chr2	99347422	99347423	MGAT4A	11320	165	CGI	FALSE	TRUE	FALSE
cg16421619	chr2	240305693	240305694	HDAC4	9759	17651	CGI	FALSE	TRUE	FALSE
cg16813053	chr2	175869807	175869808	CHN1	1123	298	CGI	TRUE	TRUE	FALSE
cg16876647	chr2	43451842	43451843	ZFP36L2	678	1901	CGI	FALSE	TRUE	FALSE
cg17152850	chr2	178627834	178627835	TTC30A	92104	-144139	Non-CGI	FALSE	TRUE	FALSE
cg17460441	chr2	121199791	121199792	LOC84931	84931	24132	CGI	FALSE	FALSE	TRUE
cg17731243	chr2	1932996	1932997	PXDN	7837	-184704	CGI-N-Shore	FALSE	TRUE	FALSE
cg17774001	chr2	25600752	25600753	DNMT3A	1788	-35292	CGI-S-Shore	FALSE	TRUE	FALSE
cg17804911	chr2	229890602	229890603	PID1	55022	245453	CGI	FALSE	TRUE	FALSE
cg17868920	chr2	158485541	158485542	ACVR1C	130399	-141	CGI	TRUE	FALSE	FALSE
cg17926234	chr2	61404587	61404588	AHSA2	130872	33	CGI	TRUE	FALSE	FALSE
cg17981927	chr2	242757618	242757619	NEU4	129807	7457	CGI	FALSE	TRUE	FALSE
cg18077307	chr2	98377791	98377792	ZAP70	7535	47759	CGI	TRUE	TRUE	FALSE
cg18078305	chr2	65215753	65215754	SLC1A4	6509	173	CGI	TRUE	FALSE	FALSE
cg18091469	chr2	8724060	8724061	ID2	3398	-98051	CGI	FALSE	FALSE	TRUE
cg18110243	chr2	37384171	37384172	EIF2AK2	5610	17	CGI	TRUE	FALSE	FALSE
cg18308176	chr2	242786266	242786267	PDCD1	5133	14790	CGI	FALSE	FALSE	TRUE
cg18338495	chr2	220110107	220110108	GLB1L	79411	22	CGI	TRUE	FALSE	FALSE
cg18409705	chr2	163200405	163200406	GCA	25801	-176	CGI-N-Shore	TRUE	FALSE	FALSE
cg18447471	chr2	242766082	242766083	NEU4	129807	15921	CGI-N-Shore	FALSE	FALSE	TRUE
cg18643762	chr2	119981172	119981173	STEAP3	55240	-210	CGI	TRUE	FALSE	FALSE
cg19227719	chr2	119067828	119067829	INSIG2	51141	221777	CGI	FALSE	FALSE	TRUE
cg19407717	chr2	1544120	1544121	TPO	7173	166124	CGI	FALSE	TRUE	FALSE
cg19435188	chr2	236293467	236293468	AGAP1	116987	-109264	CGI	FALSE	FALSE	TRUE
cg19475689	chr2	28789802	28789803	PLB1	151056	70863	CGI	FALSE	TRUE	FALSE
cg19565299	chr2	242707237	242707238	GAL3ST2	64090	-9001	CGI	FALSE	TRUE	FALSE
cg19655006	chr2	172750994	172750995	SLC25A12	8604	-180	CGI	TRUE	FALSE	FALSE
cg19726320	chr2	180886608	180886609	CWC22	57703	-14767	CGI	FALSE	FALSE	TRUE
cg19849509	chr2	175204996	175204997	SP9	100131390	5174	CGI	FALSE	FALSE	TRUE
cg19867917	chr2	3642629	3642630	COLEC11	78989	-6	CGI	TRUE	FALSE	FALSE
cg19909111	chr2	232329248	232329249	NCL	4691	-42	CGI	TRUE	FALSE	FALSE
cg20005636	chr2	180886672	180886673	CWC22	57703	-14831	CGI	FALSE	FALSE	TRUE
cg20272280	chr2	95825303	95825304	ZNF514	84874	-39	CGI	TRUE	FALSE	FALSE
cg20333904	chr2	240724165	240724166	LOC150935	150935	39610	CGI	FALSE	FALSE	TRUE
cg20347626	chr2	25896320	25896321	DTNB	1838	181	CGI	TRUE	FALSE	FALSE
cg20358020	chr2	109150681	109150682	LIMS1	3987	-128	CGI	TRUE	FALSE	FALSE
cg20399842	chr2	21346738	21346739	APOB	338	-79792	CGI-N-Shore	FALSE	FALSE	TRUE
cg20716311	chr2	178257317	178257318	LOC100130691	100130691	100	CGI	TRUE	FALSE	FALSE
cg20949959	chr2	43453251	43453252	ZFP36L2	678	492	CGI	TRUE	TRUE	FALSE
cg20960422	chr2	196521941	196521942	SLC39A10	57181	408	CGI	TRUE	TRUE	FALSE
cg21214953	chr2	71357466	71357467	MPHOSPH10	10199	21	CGI	TRUE	FALSE	FALSE
cg21321735	chr2	241760164	241760165	KIF1A	547	-438	CGI	TRUE	FALSE	FALSE
cg21463349	chr2	119600948	119600949	EN1	2019	4809	CGI	FALSE	TRUE	FALSE
cg21497043	chr2	191745649	191745650	GLS	2744	101	CGI	TRUE	FALSE	FALSE
cg21597209	chr2	55746709	55746710	CCDC104	112942	-29	CGI	TRUE	FALSE	FALSE
cg21620608	chr2	139259466	139259467	SPOPL	339745	115	CGI	TRUE	FALSE	FALSE
cg21680645	chr2	241513716	241513717	RNPEPL1	57140	5711	CGI-S-Shore	TRUE	TRUE	FALSE
cg21711862	chr2	554363	554364	TMEM18	129787	123074	CGI-N-Shelf	FALSE	FALSE	TRUE
cg21755633	chr2	65357763	65357764	RAB1A	5861	-327	CGI	TRUE	FALSE	FALSE
cg21949518	chr2	264910	264911	ACP1	52	40	CGI	TRUE	FALSE	FALSE
cg22386389	chr2	238707268	238707269	RBM44	375316	-118	CGI	TRUE	FALSE	FALSE
cg22399232	chr2	33824342	33824343	FAM98A	25940	18	CGI	TRUE	FALSE	FALSE
cg22439777	chr2	200776285	200776286	C2orf69	205327	305	CGI	TRUE	FALSE	FALSE
cg22472148	chr2	220435908	220435909	OBSL1	23363	358	CGI	TRUE	FALSE	FALSE
cg22475904	chr2	74734609	74734610	PCGF1	84759	210	CGI	TRUE	TRUE	FALSE
cg22549881	chr2	31806898	31806899	SRD5A2	6716	-857	CGI	TRUE	FALSE	FALSE
cg22860601	chr2	171627721	171627722	GAD1	2571	-45477	CGI	TRUE	FALSE	FALSE
cg22929802	chr2	30369763	30369764	YPEL5	51646	12	CGI	TRUE	FALSE	FALSE
cg22948335	chr2	70475902	70475903	TIA1	7072	-122	CGI	TRUE	FALSE	FALSE
cg22971415	chr2	88355312	88355313	KRCC1	51315	-63	CGI	TRUE	FALSE	FALSE
cg23054112	chr2	204400194	204400195	RAPH1	65059	-135	CGI	TRUE	FALSE	FALSE
cg23079012	chr2	8343710	8343711	LINC00299	339789	124837	Non-CGI	FALSE	TRUE	FALSE
cg23081331	chr2	70475998	70475999	TIA1	7072	-218	CGI	TRUE	FALSE	FALSE
cg23136645	chr2	1418073	1418074	TPO	7173	40077	Non-CGI	TRUE	TRUE	FALSE
cg23206888	chr2	242833114	242833115	CXXC11	285093	21227	CGI	FALSE	FALSE	TRUE
cg23212579	chr2	219256018	219256019	CTDSP1	58190	-7041	CGI	FALSE	TRUE	FALSE
cg23239637	chr2	1507832	1507833	TPO	7173	129836	CGI	FALSE	TRUE	FALSE
cg23246666	chr2	236672684	236672685	AGAP1	116987	269950	CGI	FALSE	TRUE	FALSE
cg23322531	chr2	8821658	8821659	ID2	3398	-453	CGI	TRUE	FALSE	FALSE
cg23338753	chr2	1895908	1895909	PXDN	7837	-147616	CGI	FALSE	TRUE	FALSE
cg23665973	chr2	219757534	219757535	WNT10A	80326	12278	CGI	FALSE	TRUE	FALSE
cg23898827	chr2	122096183	122096184	TFCP2L1	29842	-53404	Non-CGI	FALSE	TRUE	FALSE
cg24055349	chr2	63816074	63816075	WDPCP	51057	-206	CGI	TRUE	FALSE	FALSE
cg24066980	chr2	1864151	1864152	PXDN	7837	-115859	CGI	FALSE	TRUE	FALSE
cg24171337	chr2	105946028	105946029	TGFBRAP1	9392	118	CGI	FALSE	TRUE	FALSE
cg24347594	chr2	45236743	45236744	SIX2	10736	-200	CGI	TRUE	FALSE	FALSE
cg24424615	chr2	219537140	219537141	RNF25	64320	-358	CGI-S-Shore	TRUE	TRUE	FALSE
cg24614854	chr2	65356625	65356626	RAB1A	5861	808	CGI-N-Shore	FALSE	TRUE	FALSE
cg24666733	chr2	242089739	242089740	PASK	23178	-344	CGI	TRUE	TRUE	FALSE
cg24704405	chr2	30914938	30914939	CAPN13	92291	115371	Non-CGI	FALSE	FALSE	TRUE
cg24717024	chr2	20101884	20101885	TTC32	130502	-139	CGI	TRUE	FALSE	FALSE
cg24797187	chr2	100175768	100175769	REV1	51455	-69287	Non-CGI	FALSE	TRUE	FALSE
cg24913324	chr2	65215472	65215473	SLC1A4	6509	-105	CGI	TRUE	FALSE	FALSE
cg25137403	chr2	177022172	177022173	HOXD4	3233	6058	CGI	FALSE	FALSE	TRUE
cg25181651	chr2	1748132	1748133	PXDN	7837	157	CGI	TRUE	FALSE	FALSE
cg25237894	chr2	233734115	233734116	C2orf82	389084	-877	Non-CGI	TRUE	FALSE	FALSE
cg25253773	chr2	74942436	74942437	SEMA4F	10505	61042	CGI	FALSE	FALSE	TRUE
cg25377178	chr2	232651151	232651152	COPS7B	64708	4705	CGI	TRUE	TRUE	FALSE
cg25411110	chr2	178077324	178077325	HNRNPA3	220988	-96	CGI	TRUE	FALSE	FALSE
cg25417298	chr2	122406472	122406473	CLASP1	23332	578	CGI	TRUE	TRUE	FALSE
cg25730564	chr2	236100751	236100752	SH3BP4	23677	240122	Non-CGI	FALSE	FALSE	TRUE
cg26095266	chr2	10262787	10262788	RRM2	6241	91	CGI	TRUE	FALSE	FALSE
cg26154974	chr2	128848828	128848829	UGGT1	56886	73	CGI	TRUE	FALSE	FALSE
cg26528459	chr2	174146545	174146546	MLK7-AS1	339751	217	CGI-N-Shore	TRUE	FALSE	FALSE
cg26529376	chr2	96012328	96012329	KCNIP3	30818	49255	CGI	TRUE	TRUE	FALSE
cg26580609	chr2	18766140	18766141	NT5C1B-RDH14	100526794	4704	CGI	TRUE	TRUE	FALSE
cg26608203	chr2	97173877	97173878	NEURL3	93082	-30	CGI	TRUE	FALSE	FALSE
cg26667720	chr2	219773728	219773729	WNT10A	80326	28472	CGI	FALSE	TRUE	FALSE
cg26820055	chr2	131721099	131721100	ARHGEF4	50649	48312	CGI	FALSE	TRUE	FALSE
cg26876664	chr2	240302637	240302638	HDAC4	9759	20707	CGI	FALSE	TRUE	FALSE
cg27007625	chr2	240896183	240896184	MIR4786	100616417	-13671	CGI	FALSE	FALSE	TRUE
cg27114661	chr2	242255285	242255286	HDLBP	3069	-169	CGI	TRUE	TRUE	FALSE
cg27343456	chr2	39471182	39471183	CDKL4	344387	-14508	CGI	FALSE	FALSE	TRUE
cg27477610	chr2	95787254	95787255	MRPS5	64969	498	CGI	FALSE	TRUE	FALSE
cg27598195	chr2	25148746	25148747	ADCY3	109	-6690	CGI	FALSE	FALSE	TRUE
cg00134776	chr3	139653573	139653574	CLSTN2	64084	-452	CGI	TRUE	FALSE	FALSE
cg00168009	chr3	194980766	194980767	XXYLT1	152002	11127	CGI	FALSE	TRUE	FALSE
cg00627788	chr3	196296266	196296267	FBXO45	200933	540	CGI	TRUE	TRUE	FALSE
cg00801868	chr3	155588370	155588371	GMPS	8833	44	CGI	TRUE	FALSE	FALSE
cg01029676	chr3	122785968	122785969	PDIA5	10954	111	CGI	TRUE	FALSE	FALSE
cg01132975	chr3	98312544	98312545	CPOX	1371	-88	CGI	TRUE	FALSE	FALSE
cg01216369	chr3	172859022	172859023	SPATA16	83893	34	Non-CGI	TRUE	FALSE	FALSE
cg01398050	chr3	19189456	19189457	KCNH8	131096	-559	CGI	TRUE	FALSE	FALSE
cg01534217	chr3	71632920	71632921	FOXP1	27086	218	CGI	TRUE	TRUE	FALSE
cg02109726	chr3	87040308	87040309	VGLL3	389136	-50	CGI	TRUE	FALSE	FALSE
cg02215960	chr3	50607131	50607132	HEMK1	51409	547	CGI	TRUE	TRUE	FALSE
cg02564102	chr3	47823614	47823615	SMARCC1	6599	-17	CGI	TRUE	FALSE	FALSE
cg02641517	chr3	54169983	54169984	CACNA2D3	55799	13289	Non-CGI	FALSE	TRUE	FALSE
cg02721184	chr3	9834899	9834900	TADA3	10474	-203	CGI	TRUE	TRUE	FALSE
cg02728748	chr3	135913490	135913491	MSL2	55167	1196	CGI	TRUE	TRUE	FALSE
cg02826439	chr3	120004267	120004268	GPR156	165829	-40941	CGI	FALSE	FALSE	TRUE
cg02980693	chr3	128208970	128208971	GATA2	2624	3058	CGI	TRUE	TRUE	FALSE
cg03336678	chr3	40547435	40547436	ZNF620	253639	-93	CGI	TRUE	FALSE	FALSE
cg03470180	chr3	184210101	184210102	EPHB3	2049	-69484	CGI	FALSE	FALSE	TRUE
cg03648908	chr3	4805550	4805551	EGOT	100126791	-12275	CGI	FALSE	TRUE	FALSE
cg03795608	chr3	127872288	127872289	EEFSEC	60678	-23	CGI	TRUE	FALSE	FALSE
cg03800765	chr3	11313984	11313985	ATG7	10533	-24	CGI	TRUE	FALSE	FALSE
cg04016160	chr3	194304935	194304936	TMEM44	93109	49481	CGI	FALSE	FALSE	TRUE
cg04397547	chr3	165636576	165636577	BCHE	590	-81322	CGI	FALSE	FALSE	TRUE
cg04465185	chr3	194189924	194189925	ATP13A3	79572	-955	Non-CGI	TRUE	FALSE	FALSE
cg04533487	chr3	132379626	132379627	ACAD11	84129	-650	CGI	TRUE	TRUE	FALSE
cg04798497	chr3	156273025	156273026	SSR3	6747	-51	CGI	TRUE	FALSE	FALSE
cg05048199	chr3	33319000	33319001	FBXL2	25827	65	CGI	TRUE	FALSE	FALSE
cg05106206	chr3	51429142	51429143	RBM15B	29890	442	CGI	TRUE	FALSE	FALSE
cg05404618	chr3	105587719	105587720	CBLB	868	545	CGI	TRUE	TRUE	FALSE
cg05547562	chr3	128780916	128780917	GP9	2815	1270	CGI	TRUE	TRUE	FALSE
cg05889842	chr3	150421699	150421700	FAM194A	131831	41	CGI	TRUE	FALSE	FALSE
cg05906740	chr3	37035205	37035206	MLH1	4292	363	CGI	TRUE	TRUE	FALSE
cg05971592	chr3	64895105	64895106	MIR548A2	693126	189421	Non-CGI	FALSE	TRUE	FALSE
cg06151625	chr3	23957967	23957968	RPL15	6138	-326	CGI-N-Shore	TRUE	TRUE	FALSE
cg06208339	chr3	139258658	139258659	RBP1	5947	11	CGI	TRUE	FALSE	FALSE
cg06318592	chr3	47517621	47517622	SCAP	22937	-175	CGI	TRUE	FALSE	FALSE
cg06643567	chr3	54068019	54068020	CACNA2D3	55799	-88672	Non-CGI	FALSE	FALSE	TRUE
cg06787431	chr3	185827293	185827294	ETV5	2119	-391	CGI	TRUE	FALSE	FALSE
cg06804344	chr3	128778699	128778700	GP9	2815	-944	CGI-N-Shelf	TRUE	FALSE	FALSE
cg06911020	chr3	39851123	39851124	MYRIP	25924	-178	CGI	TRUE	FALSE	FALSE
cg07130869	chr3	28283173	28283174	CMC1	152100	48	CGI	TRUE	FALSE	FALSE
cg07184411	chr3	122400006	122400007	PARP14	54625	333	CGI	FALSE	TRUE	FALSE
cg07341007	chr3	195489909	195489910	MUC20	200958	42155	CGI	FALSE	TRUE	FALSE
cg07365816	chr3	153839000	153839001	ARHGEF26-AS1	100507524	0	CGI	TRUE	FALSE	FALSE
cg07377586	chr3	122283313	122283314	DTX3L	151636	127	CGI	TRUE	FALSE	FALSE
cg07618626	chr3	32726534	32726535	CNOT10	25904	-162	CGI-N-Shore	TRUE	FALSE	FALSE
cg07662771	chr3	64008007	64008008	PSMD6	9861	1649	CGI-N-Shore	TRUE	TRUE	FALSE
cg07780856	chr3	183967543	183967544	ECE2	9718	97	CGI	TRUE	FALSE	FALSE
cg08026502	chr3	196366437	196366438	LRRC33	375387	-217	CGI	TRUE	FALSE	FALSE
cg08060454	chr3	137487932	137487933	SOX14	8403	4797	CGI	FALSE	FALSE	TRUE
cg08066943	chr3	147136922	147136923	ZIC1	7545	9740	CGI	FALSE	FALSE	TRUE
cg08084454	chr3	176915592	176915593	TBL1XR1	79718	-543	CGI	TRUE	FALSE	FALSE
cg08143003	chr3	105086143	105086144	ALCAM	214	585	CGI	TRUE	FALSE	FALSE
cg08536228	chr3	63264063	63264064	SYNPR	132204	148	CGI	TRUE	FALSE	FALSE
cg08768852	chr3	69591633	69591634	FRMD4B	23150	98	CGI	TRUE	FALSE	FALSE
cg08839267	chr3	132757973	132757974	TMEM108	66000	801	CGI-S-Shore	FALSE	TRUE	FALSE
cg09380805	chr3	169384034	169384035	MECOM	2122	-2470	CGI-N-Shore	FALSE	FALSE	TRUE
cg09386682	chr3	10207069	10207070	IRAK2	3656	505	CGI-S-Shore	FALSE	TRUE	FALSE
cg09434670	chr3	47620543	47620544	CSPG5	10675	1185	CGI	TRUE	TRUE	FALSE
cg09456388	chr3	37284959	37284960	GOLGA4	2803	276	CGI	TRUE	FALSE	FALSE
cg09628877	chr3	195613739	195613740	TNK2	10188	25075	CGI	TRUE	TRUE	FALSE
cg09723533	chr3	128968410	128968411	COPG1	22820	-41	CGI	TRUE	FALSE	FALSE
cg09847443	chr3	66595364	66595365	LRIG1	26018	-44518	CGI	FALSE	FALSE	TRUE
cg10130344	chr3	197676815	197676816	RPL35A	6165	-235	CGI	TRUE	TRUE	FALSE
cg10455785	chr3	13521860	13521861	HDAC11	79885	635	CGI	TRUE	TRUE	FALSE
cg10546523	chr3	50310484	50310485	SEMA3B	7869	5443	CGI	TRUE	TRUE	FALSE
cg10596006	chr3	49711089	49711090	APEH	327	-344	CGI	TRUE	FALSE	FALSE
cg10666906	chr3	37284460	37284461	GOLGA4	2803	-220	CGI	TRUE	FALSE	FALSE
cg10741399	chr3	113251979	113251980	SIDT1	54847	760	CGI	TRUE	FALSE	FALSE
cg10901258	chr3	135913734	135913735	MSL2	55167	952	CGI	TRUE	TRUE	FALSE
cg11203156	chr3	125314216	125314217	OSBPL11	114885	163	CGI	TRUE	FALSE	FALSE
cg11431257	chr3	143692087	143692088	C3orf58	205428	1446	CGI	TRUE	TRUE	FALSE
cg11600697	chr3	37034814	37034815	EPM2AIP1	9852	-18	CGI	TRUE	FALSE	FALSE
cg12386194	chr3	101231763	101231764	SENP7	57337	320	CGI	FALSE	TRUE	FALSE
cg12525224	chr3	5229201	5229202	EDEM1	9695	-128	CGI	TRUE	FALSE	FALSE
cg12591404	chr3	5020859	5020860	BHLHE40	8553	-236	CGI	TRUE	TRUE	FALSE
cg12691230	chr3	46064611	46064612	XCR1	2829	4366	CGI-S-Shore	TRUE	TRUE	FALSE
cg12817999	chr3	9438877	9438878	SETD5-AS1	440944	295	CGI	TRUE	TRUE	FALSE
cg12843448	chr3	193789466	193789467	HES1	3280	-64463	CGI-S-Shore	FALSE	FALSE	TRUE
cg13147822	chr3	168864313	168864314	MECOM	2122	517248	CGI	TRUE	TRUE	FALSE
cg13234732	chr3	180547932	180547933	FXR1	8087	-82300	CGI	FALSE	TRUE	FALSE
cg13409248	chr3	40428643	40428644	ENTPD3	956	-28	CGI	TRUE	FALSE	FALSE
cg13607248	chr3	183874556	183874557	DVL3	1857	1271	CGI-S-Shore	TRUE	TRUE	FALSE
cg13736369	chr3	46775569	46775570	PRSS46	100287362	2350	Non-CGI	TRUE	TRUE	FALSE
cg14637144	chr3	196750506	196750507	MFI2	4241	6179	CGI	FALSE	TRUE	FALSE
cg14697246	chr3	48487981	48487982	ATRIP	84126	-158	CGI	TRUE	FALSE	FALSE
cg14847243	chr3	184104362	184104363	CHRD	8646	6500	CGI	FALSE	TRUE	FALSE
cg15092395	chr3	33155457	33155458	CRTAP	10491	6	CGI	TRUE	FALSE	FALSE
cg15229124	chr3	139258912	139258913	RBP1	5947	-240	CGI	TRUE	FALSE	FALSE
cg15602053	chr3	138635064	138635065	FOXL2	668	30916	CGI	FALSE	FALSE	TRUE
cg16034541	chr3	195490309	195490310	MUC20	200958	42555	CGI-S-Shore	FALSE	TRUE	FALSE
cg16188349	chr3	61656617	61656618	PTPRG	5793	109373	CGI-N-Shore	FALSE	TRUE	FALSE
cg16311339	chr3	180397336	180397337	CCDC39	339829	58324	CGI	TRUE	TRUE	FALSE
cg16529883	chr3	50191944	50191945	SEMA3F	6405	-902	CGI-N-Shore	TRUE	TRUE	FALSE
cg16625000	chr3	184081092	184081093	POLR2H	5437	-100	CGI	TRUE	FALSE	FALSE
cg16661554	chr3	181420020	181420021	SOX2	6657	-9690	CGI	FALSE	TRUE	FALSE
cg16755393	chr3	48130818	48130819	MAP4	4134	-48	CGI	TRUE	FALSE	FALSE
cg16909408	chr3	134125688	134125689	MIR4788	100616281	-30979	CGI	FALSE	FALSE	TRUE
cg17392043	chr3	188495102	188495103	TPRG1	285386	-169899	Non-CGI	FALSE	TRUE	FALSE
cg17462381	chr3	132441365	132441366	NPHP3	27031	-61	CGI	TRUE	TRUE	FALSE
cg17621718	chr3	42306737	42306738	CCK	885	923	CGI	TRUE	TRUE	FALSE
cg17877494	chr3	38178256	38178257	ACAA1	30	475	CGI	TRUE	TRUE	FALSE
cg18129748	chr3	49941408	49941409	MST1R	4486	-101	CGI	TRUE	FALSE	FALSE
cg18256466	chr3	123680504	123680505	CCDC14	64770	-248	CGI-S-Shore	TRUE	FALSE	FALSE
cg18311854	chr3	191019557	191019558	CCDC50	152137	-27315	Non-CGI	FALSE	TRUE	FALSE
cg18403480	chr3	38537719	38537720	EXOG	9941	-42	CGI	TRUE	FALSE	FALSE
cg18768347	chr3	5024849	5024850	BHLHE40-AS1	100507582	-3202	CGI	FALSE	TRUE	FALSE
cg18990407	chr3	184297380	184297381	EPHB3	2049	17792	CGI	FALSE	TRUE	FALSE
cg19111042	chr3	15469386	15469387	EAF1	85403	321	CGI	TRUE	FALSE	FALSE
cg19628771	chr3	9027576	9027577	RAD18	56852	-22416	CGI-S-Shore	FALSE	TRUE	FALSE
cg19823793	chr3	20227663	20227664	SGOL1	151648	59	CGI	TRUE	FALSE	FALSE
cg19836345	chr3	49466585	49466586	NICN1	84276	170	CGI	TRUE	FALSE	FALSE
cg20141549	chr3	51534298	51534299	VPRBP	9730	-279	CGI	TRUE	FALSE	FALSE
cg20296001	chr3	180320159	180320160	TTC14	151613	240	CGI	TRUE	FALSE	FALSE
cg20367852	chr3	187457520	187457521	BCL6	604	5991	CGI	FALSE	TRUE	FALSE
cg20396559	chr3	65699637	65699638	MAGI1	9223	324870	Non-CGI	FALSE	TRUE	FALSE
cg20981856	chr3	17787350	17787351	TBC1D5	9779	-3109	CGI-S-Shelf	FALSE	FALSE	TRUE
cg21104449	chr3	196485278	196485279	PAK2	5062	18549	CGI-N-Shelf	FALSE	TRUE	FALSE
cg21473142	chr3	27762095	27762096	EOMES	8320	2109	CGI-S-Shore	FALSE	TRUE	FALSE
cg22090419	chr3	53844172	53844173	CHDH	55349	36246	CGI	FALSE	TRUE	FALSE
cg22612116	chr3	134204778	134204779	ANAPC13	25847	85	CGI	TRUE	TRUE	FALSE
cg22887911	chr3	44903730	44903731	TMEM42	131616	321	CGI	FALSE	TRUE	FALSE
cg22960945	chr3	9957459	9957460	IL17RC	84818	-1297	CGI	TRUE	TRUE	FALSE
cg23363832	chr3	139258939	139258940	RBP1	5947	-267	CGI-S-Shore	TRUE	FALSE	FALSE
cg23610018	chr3	11761460	11761461	VGLL4	9686	758	CGI	FALSE	TRUE	FALSE
cg23651146	chr3	57261829	57261830	APPL1	26060	63	CGI	TRUE	FALSE	FALSE
cg23816928	chr3	150264597	150264598	EIF2A	83939	22	CGI	TRUE	TRUE	FALSE
cg23955684	chr3	16555288	16555289	RFTN1	23180	-65	CGI	TRUE	FALSE	FALSE
cg24023588	chr3	128997632	128997633	C3orf37	56941	-50	CGI	TRUE	FALSE	FALSE
cg24122247	chr3	10068142	10068143	FANCD2	2177	28	CGI	TRUE	FALSE	FALSE
cg25701418	chr3	66024556	66024557	MAGI1	9223	-46	CGI	TRUE	FALSE	FALSE
cg25750609	chr3	101280791	101280792	TRMT10C	54931	78	CGI	TRUE	FALSE	FALSE
cg25809637	chr3	93698966	93698967	ARL13B	200894	-15	CGI	TRUE	FALSE	FALSE
cg25976563	chr3	179169592	179169593	GNB4	59345	-220	CGI	TRUE	FALSE	FALSE
cg26143045	chr3	132757610	132757611	TMEM108	66000	438	CGI	FALSE	TRUE	FALSE
cg26301689	chr3	142681704	142681705	PAQR9	344838	472	CGI	TRUE	FALSE	FALSE
cg26309929	chr3	24083947	24083948	LINC00691	152024	60789	Non-CGI	FALSE	FALSE	TRUE
cg26404568	chr3	12882848	12882849	RPL32	6161	231	CGI	TRUE	TRUE	FALSE
cg26433722	chr3	58163614	58163615	DNASE1L3	1776	37237	CGI	FALSE	FALSE	TRUE
cg26545834	chr3	185303959	185303960	SENP2	59343	3451	CGI	TRUE	TRUE	FALSE
cg26714086	chr3	196392615	196392616	LRRC33	375387	25958	Non-CGI	FALSE	FALSE	TRUE
cg27270388	chr3	183948255	183948256	VWA5B2	90113	-60	CGI	TRUE	FALSE	FALSE
cg27271513	chr3	38206730	38206731	OXSR1	9943	-294	CGI	TRUE	FALSE	FALSE
cg27297753	chr3	10052900	10052901	LOC401052	401052	-120	CGI	TRUE	TRUE	FALSE
cg27532099	chr3	120461514	120461515	GTF2E1	2960	-42	CGI	TRUE	FALSE	FALSE
cg27575106	chr3	119396361	119396362	COX17	10063	-117	CGI	TRUE	FALSE	FALSE
cg27614445	chr3	179041226	179041227	ZNF639	51193	406	CGI	TRUE	TRUE	FALSE
cg00604539	chr4	119606524	119606525	METTL14	57721	-48	CGI-N-Shore	TRUE	FALSE	FALSE
cg01023714	chr4	10084725	10084726	MIR3138	100423011	-4408	Non-CGI	TRUE	TRUE	FALSE
cg01219382	chr4	184328462	184328463	CDKN2AIP	55602	-37325	CGI	FALSE	FALSE	TRUE
cg01243968	chr4	87515433	87515434	PTPN13	5783	-33	CGI	TRUE	FALSE	FALSE
cg01250155	chr4	1661123	1661124	FAM53A	152877	24863	CGI	FALSE	TRUE	FALSE
cg01283834	chr4	141488964	141488965	UCP1	7350	993	CGI-N-Shore	FALSE	TRUE	FALSE
cg01377200	chr4	184938316	184938317	STOX2	56977	111806	CGI	FALSE	TRUE	FALSE
cg01942962	chr4	158143439	158143440	GRIA2	2891	2143	CGI	FALSE	TRUE	FALSE
cg02131049	chr4	77227621	77227622	STBD1	8987	441	CGI	TRUE	TRUE	FALSE
cg02567719	chr4	83350534	83350535	HNRPDL	9987	842	CGI	TRUE	FALSE	FALSE
cg02951274	chr4	3417431	3417432	HGFAC	3083	-26293	CGI	FALSE	TRUE	FALSE
cg02969873	chr4	1330999	1331000	UVSSA	57654	-10103	CGI	FALSE	TRUE	FALSE
cg03402994	chr4	984131	984132	SLC26A1	10861	3091	CGI	FALSE	TRUE	FALSE
cg03482087	chr4	128886832	128886833	MFSD8	256471	305	CGI	TRUE	TRUE	FALSE
cg03522447	chr4	88929611	88929612	PKD2	5311	811	CGI	FALSE	TRUE	FALSE
cg04066316	chr4	189433040	189433041	LOC401164	401164	111149	Non-CGI	FALSE	TRUE	FALSE
cg04178057	chr4	108910868	108910869	HADH	3033	0	CGI	TRUE	FALSE	FALSE
cg04223207	chr4	48018662	48018663	CNGA1	1259	-51	CGI	TRUE	FALSE	FALSE
cg05181186	chr4	85504391	85504392	CDS1	1040	333	CGI	TRUE	FALSE	FALSE
cg05275153	chr4	3431837	3431838	HGFAC	3083	-11887	CGI-N-Shore	FALSE	TRUE	FALSE
cg05300158	chr4	140477727	140477728	SETD7	80854	-149	CGI	TRUE	FALSE	FALSE
cg05682719	chr4	119809971	119809972	SYNPO2	171024	-23	CGI	TRUE	FALSE	FALSE
cg05719252	chr4	75023851	75023852	MTHFD2L	441024	43954	CGI	TRUE	TRUE	FALSE
cg05821186	chr4	1198353	1198354	LOC100130872	100130872	4395	CGI-S-Shelf	FALSE	TRUE	FALSE
cg05880302	chr4	188426278	188426279	LOC339975	339975	487	CGI-N-Shore	FALSE	TRUE	FALSE
cg05907477	chr4	182080306	182080307	LINC00290	728081	-3	Non-CGI	TRUE	FALSE	FALSE
cg06274396	chr4	185941625	185941626	HELT	391723	1629	CGI	FALSE	TRUE	FALSE
cg06464441	chr4	130014500	130014501	SCLT1	132320	262	CGI	TRUE	FALSE	FALSE
cg06532184	chr4	16227813	16227814	TAPT1	202018	346	CGI	TRUE	TRUE	FALSE
cg06538183	chr4	2464842	2464843	RNF4	6047	-5951	CGI	FALSE	FALSE	TRUE
cg06651522	chr4	7862646	7862647	AFAP1	60312	79005	Non-CGI	FALSE	TRUE	FALSE
cg06798642	chr4	48272082	48272083	TEC	7006	-267	CGI	TRUE	FALSE	FALSE
cg06839424	chr4	1007283	1007284	FGFRL1	53834	2342	CGI	FALSE	TRUE	FALSE
cg06848047	chr4	90757629	90757630	LOC644248	644248	76	CGI	TRUE	TRUE	FALSE
cg07082158	chr4	114681880	114681881	CAMK2D	817	1201	CGI-S-Shore	FALSE	TRUE	FALSE
cg07110949	chr4	1309878	1309879	MAEA	10296	26205	CGI	FALSE	TRUE	FALSE
cg07125251	chr4	185089712	185089713	ENPP6	133121	49400	CGI	FALSE	TRUE	FALSE
cg07701716	chr4	170533879	170533880	NEK1	4750	-100	CGI	TRUE	FALSE	FALSE
cg08136276	chr4	83351514	83351515	HNRPDL	9987	-135	CGI	TRUE	FALSE	FALSE
cg08422863	chr4	89300650	89300651	HERC6	55008	758	CGI	FALSE	TRUE	FALSE
cg08744727	chr4	206112	206113	ZNF876P	642280	-275	CGI-N-Shore	TRUE	FALSE	FALSE
cg09038155	chr4	139937227	139937228	CCRN4L	25819	283	CGI	TRUE	FALSE	FALSE
cg09117206	chr4	109684077	109684078	AGXT2L1	64850	156	CGI	TRUE	FALSE	FALSE
cg09237562	chr4	137733853	137733854	PCDH18	54510	719793	CGI	FALSE	FALSE	TRUE
cg09499698	chr4	68411154	68411155	CENPC1	1060	100	CGI	TRUE	FALSE	FALSE
cg09534159	chr4	10458918	10458919	ZNF518B	85460	112	CGI	FALSE	TRUE	FALSE
cg10029186	chr4	174430771	174430772	HAND2	9464	20605	CGI	FALSE	FALSE	TRUE
cg10308775	chr4	178478768	178478769	AGA	175	-115110	Non-CGI	FALSE	TRUE	FALSE
cg10737891	chr4	85504029	85504030	CDS1	1040	-26	CGI	TRUE	FALSE	FALSE
cg10752575	chr4	1215743	1215744	LOC100130872	100130872	-12992	CGI	FALSE	TRUE	FALSE
cg10879955	chr4	48271942	48271943	TEC	7006	-127	CGI	TRUE	FALSE	FALSE
cg10922881	chr4	7438657	7438658	PSAPL1	768239	-1956	CGI-S-Shelf	TRUE	TRUE	FALSE
cg10937802	chr4	26177098	26177099	RBPJ	3516	-144232	Non-CGI	FALSE	FALSE	TRUE
cg11107149	chr4	960835	960836	DGKQ	1609	6507	CGI	FALSE	TRUE	FALSE
cg11258164	chr4	44450881	44450882	KCTD8	386617	-56	CGI	TRUE	FALSE	FALSE
cg11392855	chr4	2795155	2795156	SH3BP2	6452	404	CGI	FALSE	TRUE	FALSE
cg11532267	chr4	38869271	38869272	FAM114A1	92689	-81	CGI	TRUE	FALSE	FALSE
cg11918740	chr4	17616649	17616650	MED28	80306	375	CGI	FALSE	TRUE	FALSE
cg12087304	chr4	122873018	122873019	TRPC3	7222	-108	CGI	TRUE	FALSE	FALSE
cg12370284	chr4	88312521	88312522	HSD17B11	51170	-65	CGI	TRUE	FALSE	FALSE
cg12593336	chr4	2243942	2243943	POLN	353497	-81	CGI	TRUE	FALSE	FALSE
cg13348155	chr4	124426923	124426924	SPRY1	10252	108966	CGI	FALSE	FALSE	TRUE
cg13356354	chr4	6675676	6675677	LOC93622	93622	-143	CGI	TRUE	FALSE	FALSE
cg13775316	chr4	109093218	109093219	LEF1	51176	-3105	CGI	TRUE	TRUE	FALSE
cg13914083	chr4	158141526	158141527	GRIA2	2891	230	CGI	TRUE	TRUE	FALSE
cg13939352	chr4	57253710	57253711	AASDH	132949	-71	CGI	TRUE	FALSE	FALSE
cg13952745	chr4	93225466	93225467	GRID2	2895	-82	CGI	TRUE	FALSE	FALSE
cg14177620	chr4	56719854	56719855	EXOC1	55763	37	CGI	TRUE	FALSE	FALSE
cg14243299	chr4	76439964	76439965	THAP6	152815	309	CGI	TRUE	TRUE	FALSE
cg14271438	chr4	119757241	119757242	SEC24D	9871	2584	CGI	TRUE	TRUE	FALSE
cg14525473	chr4	1161319	1161320	LOC100130872	100130872	41429	CGI	FALSE	TRUE	FALSE
cg14611892	chr4	113067071	113067072	C4orf32	132720	517	CGI	FALSE	TRUE	FALSE
cg15436123	chr4	3390332	3390333	HGFAC	3083	-53392	CGI-N-Shore	FALSE	TRUE	FALSE
cg16145167	chr4	38825411	38825412	TLR1	7096	-18998	CGI-N-Shore	FALSE	TRUE	FALSE
cg16371080	chr4	3309069	3309070	RGS12	6002	14313	CGI	FALSE	TRUE	FALSE
cg16426339	chr4	85419530	85419531	NKX6-1	4825	-142	CGI	TRUE	FALSE	FALSE
cg16646539	chr4	88141915	88141916	KLHL8	57563	-240	CGI	TRUE	FALSE	FALSE
cg16814143	chr4	154216637	154216638	ANXA2P1	303	13324	CGI	FALSE	TRUE	FALSE
cg16976370	chr4	46995821	46995822	GABRA4	2557	601	CGI	TRUE	FALSE	FALSE
cg17061192	chr4	185926620	185926621	HELT	391723	-13373	CGI	FALSE	FALSE	TRUE
cg17118812	chr4	185888982	185888983	HELT	391723	-51011	CGI	FALSE	FALSE	TRUE
cg17170743	chr4	719037	719038	PCGF3	10336	19463	CGI-N-Shore	FALSE	TRUE	FALSE
cg17397631	chr4	779880	779881	LOC100129917	100129917	-4243	CGI	FALSE	TRUE	FALSE
cg17484629	chr4	111119220	111119221	ELOVL6	79071	598	CGI	FALSE	TRUE	FALSE
cg17765713	chr4	128801754	128801755	PLK4	10733	-260	CGI-N-Shore	TRUE	FALSE	FALSE
cg18145393	chr4	520203	520204	ZNF721	170960	-26760	CGI	FALSE	TRUE	FALSE
cg18631798	chr4	8396163	8396164	TRMT44	152992	-44439	CGI	FALSE	TRUE	FALSE
cg18705900	chr4	170192536	170192537	SH3RF1	57630	-286	CGI	TRUE	FALSE	FALSE
cg19931305	chr4	147443703	147443704	SLC10A7	84068	-579	CGI	TRUE	FALSE	FALSE
cg20445582	chr4	55083843	55083844	GSX2	170825	117594	CGI	FALSE	TRUE	FALSE
cg20594316	chr4	2389156	2389157	ZFYVE28	57732	31212	CGI-S-Shore	FALSE	TRUE	FALSE
cg20642710	chr4	81951951	81951952	BMP3	651	-166	CGI	TRUE	FALSE	FALSE
cg21225608	chr4	52709259	52709260	DCUN1D4	23142	-15	CGI	TRUE	FALSE	FALSE
cg21641573	chr4	1210478	1210479	LOC100130872	100130872	-7727	CGI	FALSE	TRUE	FALSE
cg21746997	chr4	95679381	95679382	BMPR1B	658	252	CGI	FALSE	TRUE	FALSE
cg21832951	chr4	87927955	87927956	AFF1	4299	71800	CGI	TRUE	TRUE	FALSE
cg21923317	chr4	3387678	3387679	HGFAC	3083	-56046	CGI	TRUE	TRUE	FALSE
cg22077701	chr4	144434441	144434442	SMARCA5	8467	-173	CGI	TRUE	FALSE	FALSE
cg22097342	chr4	122618153	122618154	ANXA5	308	-5	CGI	TRUE	FALSE	FALSE
cg22105146	chr4	56262445	56262446	TMEM165	55858	354	CGI	TRUE	FALSE	FALSE
cg22216491	chr4	110624749	110624750	CASP6	839	-119	CGI	TRUE	FALSE	FALSE
cg22231101	chr4	6052554	6052555	MIR378D1	100616201	-127498	CGI	FALSE	TRUE	FALSE
cg22364126	chr4	171964547	171964548	LOC100506122	100506122	2793	CGI	FALSE	TRUE	FALSE
cg22423979	chr4	124318670	124318671	SPRY1	10252	713	CGI	FALSE	TRUE	FALSE
cg22443651	chr4	40453161	40453162	MIR4802	100616274	50973	Non-CGI	FALSE	TRUE	FALSE
cg22599148	chr4	1334055	1334056	UVSSA	57654	-7047	CGI	FALSE	FALSE	TRUE
cg22833147	chr4	178230858	178230859	NEIL3	55247	-131	CGI-N-Shore	TRUE	FALSE	FALSE
cg22870307	chr4	13300487	13300488	HSP90AB2P	391634	-34548	CGI	FALSE	FALSE	TRUE
cg22930642	chr4	2936657	2936658	NOP14-AS1	317648	30	CGI	TRUE	FALSE	FALSE
cg23186787	chr4	4380004	4380005	NSG1	27065	30134	Non-CGI	FALSE	TRUE	FALSE
cg23210109	chr4	3250690	3250691	MSANTD1	345222	-75	CGI-N-Shore	TRUE	FALSE	FALSE
cg23547048	chr4	698616	698617	PCGF3	10336	-955	CGI	TRUE	FALSE	FALSE
cg23573638	chr4	184908254	184908255	STOX2	56977	81744	CGI	FALSE	TRUE	FALSE
cg23802935	chr4	147366958	147366959	SLC10A7	84068	76163	CGI	FALSE	TRUE	FALSE
cg23847701	chr4	140656096	140656097	MGST2	4258	69173	CGI	FALSE	TRUE	FALSE
cg23951961	chr4	42154912	42154913	BEND4	389206	-16	CGI	TRUE	FALSE	FALSE
cg23960561	chr4	40058360	40058361	N4BP2	55728	-162	CGI	TRUE	TRUE	FALSE
cg24271100	chr4	122722383	122722384	EXOSC9	5393	-87	CGI	TRUE	FALSE	FALSE
cg24389389	chr4	141075404	141075405	MAML3	55534	-170	CGI	TRUE	FALSE	FALSE
cg24551570	chr4	174255085	174255086	HMGB2	3148	508	CGI	TRUE	TRUE	FALSE
cg24654176	chr4	111119358	111119359	ELOVL6	79071	460	CGI	FALSE	TRUE	FALSE
cg24693490	chr4	55093612	55093613	GSX2	170825	127363	CGI	TRUE	TRUE	FALSE
cg24703018	chr4	75859815	75859816	PARM1	25849	1529	CGI	FALSE	TRUE	FALSE
cg24820270	chr4	187629336	187629337	FAT1	2195	18512	CGI-S-Shore	FALSE	TRUE	FALSE
cg25186874	chr4	141540407	141540408	UCP1	7350	-50447	CGI-N-Shelf	FALSE	FALSE	TRUE
cg25698236	chr4	187455532	187455533	MTNR1A	4543	21003	CGI	FALSE	TRUE	FALSE
cg25777912	chr4	8233394	8233395	SH3TC1	54436	32333	CGI	FALSE	TRUE	FALSE
cg25994476	chr4	82393082	82393083	RASGEF1B	153020	-20	CGI-S-Shore	TRUE	FALSE	FALSE
cg26084529	chr4	155664993	155664994	LRAT	9227	-157	CGI	TRUE	TRUE	FALSE
cg26131292	chr4	79861064	79861065	PAQR3	152559	-481	CGI-S-Shore	TRUE	FALSE	FALSE
cg26455541	chr4	26321238	26321239	RBPJ	3516	-92	CGI	TRUE	FALSE	FALSE
cg27183456	chr4	113333163	113333164	NEUROG2	63973	104163	CGI	TRUE	TRUE	FALSE
cg27492467	chr4	6472445	6472446	PPP2R2C	5522	92880	CGI	FALSE	TRUE	FALSE
cg00315775	chr5	180258154	180258155	LINC00847	729678	1194	CGI	TRUE	FALSE	FALSE
cg00407623	chr5	80597718	80597719	ZCCHC9	84240	315	CGI	TRUE	TRUE	FALSE
cg00408776	chr5	1337571	1337572	CLPTM1L	81037	7429	CGI-N-Shore	FALSE	TRUE	FALSE
cg00582881	chr5	148651359	148651360	AFAP1L1	134265	-40	CGI	TRUE	FALSE	FALSE
cg01004278	chr5	132148978	132148979	SOWAHA	134548	-53	CGI	TRUE	FALSE	FALSE
cg01072076	chr5	1930801	1930802	IRX4	50805	-47920	CGI	FALSE	FALSE	TRUE
cg01184139	chr5	180649358	180649359	MIR4638	100616342	273	CGI	TRUE	FALSE	FALSE
cg01247845	chr5	68513627	68513628	MRPS36	92259	53	CGI	TRUE	FALSE	FALSE
cg01290068	chr5	162932702	162932703	MAT2B	27430	2470	CGI	TRUE	TRUE	FALSE
cg01803514	chr5	130971035	130971036	RAPGEF6	51735	161719	CGI	TRUE	TRUE	FALSE
cg01941047	chr5	65440763	65440764	SREK1	140890	677	CGI	TRUE	TRUE	FALSE
cg02041108	chr5	35946185	35946186	CAPSL	133690	-7303	CGI	FALSE	FALSE	TRUE
cg02103653	chr5	111504758	111504759	SNORA13	654322	7575	Non-CGI	FALSE	TRUE	FALSE
cg02353814	chr5	135146660	135146661	SLC25A48	153328	-23703	Non-CGI	FALSE	FALSE	TRUE
cg02450613	chr5	37840089	37840090	GDNF	2668	-306	CGI	TRUE	FALSE	FALSE
cg02520160	chr5	156589436	156589437	FAM71B	153745	3841	Non-CGI	FALSE	TRUE	FALSE
cg02528389	chr5	143550332	143550333	YIPF5	81555	-53	CGI	TRUE	FALSE	FALSE
cg02613713	chr5	149677228	149677229	ARSI	340075	5295	CGI	FALSE	TRUE	FALSE
cg02661258	chr5	14664470	14664471	FAM105B	90268	-311	CGI	TRUE	FALSE	FALSE
cg03534031	chr5	139139105	139139106	PSD2	84249	-36299	CGI	FALSE	FALSE	TRUE
cg03632623	chr5	6846259	6846260	MIR4278	100422999	-18224	Non-CGI	FALSE	FALSE	TRUE
cg03653541	chr5	59064523	59064524	PART1	25859	-719015	CGI	TRUE	TRUE	FALSE
cg03679565	chr5	1882775	1882776	IRX4	50805	103	CGI	TRUE	FALSE	FALSE
cg04059965	chr5	179285867	179285868	C5orf45	51149	-26	CGI	TRUE	FALSE	FALSE
cg04696181	chr5	3386790	3386791	LOC285577	285577	149416	CGI	FALSE	FALSE	TRUE
cg05458841	chr5	65221764	65221765	ERBB2IP	55914	-616	CGI	TRUE	FALSE	FALSE
cg05867645	chr5	176778779	176778780	LMAN2	10960	104	CGI	TRUE	FALSE	FALSE
cg05970014	chr5	176863164	176863165	GRK6	2870	9476	CGI	FALSE	TRUE	FALSE
cg05970768	chr5	171682616	171682617	UBTD2	92181	28177	Non-CGI	FALSE	TRUE	FALSE
cg06407470	chr5	75379270	75379271	SV2C	22987	-33	CGI	TRUE	FALSE	FALSE
cg06517759	chr5	32585741	32585742	SUB1	10923	135	CGI	FALSE	TRUE	FALSE
cg06560300	chr5	1278791	1278792	TERT	7015	16369	CGI	FALSE	TRUE	FALSE
cg06610675	chr5	60241428	60241429	NDUFAF2	91942	471	CGI	TRUE	TRUE	FALSE
cg06990967	chr5	2041382	2041383	IRX4	50805	-158501	CGI-S-Shelf	FALSE	FALSE	TRUE
cg07180252	chr5	142150015	142150016	ARHGAP26	23092	-275	CGI	TRUE	FALSE	FALSE
cg07298437	chr5	176074358	176074359	TSPAN17	26262	-28	CGI	TRUE	FALSE	FALSE
cg07448606	chr5	140855857	140855858	PCDHGC3	5098	287	CGI	TRUE	TRUE	FALSE
cg07763047	chr5	160974837	160974838	GABRB2	2561	291	CGI	TRUE	TRUE	FALSE
cg07816229	chr5	154317915	154317916	GEMIN5	25929	-138	CGI	TRUE	FALSE	FALSE
cg08199544	chr5	140418	140419	PLEKHG4B	153478	44	CGI-N-Shelf	TRUE	FALSE	FALSE
cg08213444	chr5	784871	784872	ZDHHC11	79844	66228	CGI	FALSE	FALSE	TRUE
cg08264699	chr5	110560505	110560506	CAMK4	814	557	CGI	FALSE	TRUE	FALSE
cg08391321	chr5	112630695	112630696	TSSK1B	83942	140031	CGI	TRUE	TRUE	FALSE
cg08440550	chr5	131132801	131132802	RAPGEF6	51735	-44	CGI	TRUE	FALSE	FALSE
cg08490173	chr5	114880508	114880509	FEM1C	56929	81	CGI	TRUE	FALSE	FALSE
cg08535247	chr5	1643655	1643656	LOC728613	728613	-9534	CGI-S-Shore	FALSE	FALSE	TRUE
cg08674342	chr5	36152125	36152126	SKP2	6502	-18	CGI	TRUE	FALSE	FALSE
cg08691323	chr5	54826683	54826684	RNF138P1	379013	3685	CGI	TRUE	TRUE	FALSE
cg08707475	chr5	43066990	43066991	LOC100132356	100132356	81	CGI	TRUE	FALSE	FALSE
cg08740477	chr5	108084642	108084643	FER	2241	1118	CGI	TRUE	TRUE	FALSE
cg08761396	chr5	42468836	42468837	GHR	2690	44958	CGI	FALSE	TRUE	FALSE
cg09012726	chr5	141266625	141266626	PCDH1	5097	-8680	CGI-S-Shelf	FALSE	FALSE	TRUE
cg09734469	chr5	3346779	3346780	LOC285577	285577	189427	Non-CGI	FALSE	FALSE	TRUE
cg09848727	chr5	149829370	149829371	RPS14	6208	-50	CGI	TRUE	FALSE	FALSE
cg10190808	chr5	149829522	149829523	RPS14	6208	-202	CGI	TRUE	FALSE	FALSE
cg10210959	chr5	112257975	112257976	REEP5	7905	54	CGI	TRUE	FALSE	FALSE
cg10544510	chr5	3761226	3761227	IRX1	79192	165057	CGI	FALSE	FALSE	TRUE
cg11099930	chr5	36876680	36876681	NIPBL	25836	-179	CGI	TRUE	FALSE	FALSE
cg11112892	chr5	131563589	131563590	P4HA2	8974	-32	CGI	TRUE	FALSE	FALSE
cg11260904	chr5	134872029	134872030	NEUROG1	4762	-389	CGI	TRUE	FALSE	FALSE
cg11283154	chr5	55008216	55008217	SLC38A9	153129	336	CGI	TRUE	FALSE	FALSE
cg11444704	chr5	159738916	159738917	CCNJL	79616	27681	CGI	FALSE	TRUE	FALSE
cg11613229	chr5	119800742	119800743	PRR16	51334	722	CGI-S-Shore	FALSE	TRUE	FALSE
cg11757894	chr5	172198326	172198327	DUSP1	1843	-122	CGI	TRUE	FALSE	FALSE
cg11782779	chr5	31194008	31194009	CDH6	1004	245	CGI	FALSE	TRUE	FALSE
cg12148675	chr5	118604807	118604808	TNFAIP8	25816	388	CGI	FALSE	TRUE	FALSE
cg13305415	chr5	141697464	141697465	SPRY4	81848	7154	CGI-S-Shelf	FALSE	TRUE	FALSE
cg13566430	chr5	131992455	131992456	IL13	3596	-1408	CGI-S-Shore	TRUE	FALSE	FALSE
cg13898548	chr5	176924827	176924828	PDLIM7	9260	-224	CGI	TRUE	FALSE	FALSE
cg13917968	chr5	151504425	151504426	GLRA1	2741	-200027	Non-CGI	FALSE	TRUE	FALSE
cg13991635	chr5	131133339	131133340	RAPGEF6	51735	-582	CGI	TRUE	FALSE	FALSE
cg13995918	chr5	1280305	1280306	TERT	7015	14855	CGI	TRUE	TRUE	FALSE
cg14474582	chr5	176924578	176924579	PDLIM7	9260	22	CGI	TRUE	FALSE	FALSE
cg15168727	chr5	72599228	72599229	TMEM174	134288	130204	CGI	FALSE	FALSE	TRUE
cg15897774	chr5	7869176	7869177	FASTKD3	79072	-25	CGI	TRUE	FALSE	FALSE
cg16105594	chr5	88180095	88180096	MEF2C	4208	19825	CGI	TRUE	TRUE	FALSE
cg16230626	chr5	124298608	124298609	ZNF608	57507	-214107	Non-CGI	FALSE	FALSE	TRUE
cg16375290	chr5	177412718	177412719	PROP1	5626	10523	CGI	FALSE	FALSE	TRUE
cg16398128	chr5	16465888	16465889	ZNF622	90441	4	CGI	TRUE	FALSE	FALSE
cg16599698	chr5	77590670	77590671	AP3B1	8546	-141	CGI	TRUE	FALSE	FALSE
cg17304712	chr5	1318519	1318520	MIR4457	100616235	-9026	CGI	TRUE	TRUE	FALSE
cg17328171	chr5	59105974	59105975	PART1	25859	-677564	CGI	FALSE	TRUE	FALSE
cg17339617	chr5	146608294	146608295	STK32A	202374	-6283	CGI-S-Shore	FALSE	FALSE	TRUE
cg17347471	chr5	52405518	52405519	MOCS2	4338	78	CGI	TRUE	TRUE	FALSE
cg17433211	chr5	2007375	2007376	IRX4	50805	-124494	CGI	FALSE	FALSE	TRUE
cg17497066	chr5	34007883	34007884	AMACR	23600	335	CGI	TRUE	FALSE	FALSE
cg17633020	chr5	58335180	58335181	RAB3C	115827	456240	CGI	TRUE	TRUE	FALSE
cg17654660	chr5	176784965	176784966	RGS14	10636	120	CGI	TRUE	FALSE	FALSE
cg17940783	chr5	139165098	139165099	PSD2	84249	-10306	CGI-N-Shelf	FALSE	FALSE	TRUE
cg17977043	chr5	893049	893050	TRIP13	9319	79	CGI	TRUE	FALSE	FALSE
cg18096251	chr5	2205553	2205554	IRX4	50805	-322672	CGI-N-Shore	FALSE	FALSE	TRUE
cg18121224	chr5	176559563	176559564	NSD1	64324	-515	CGI	TRUE	FALSE	FALSE
cg18174928	chr5	38557085	38557086	MIR3650	100500824	576	CGI	TRUE	TRUE	FALSE
cg18388380	chr5	63802491	63802492	RGS7BP	401190	38	CGI	TRUE	FALSE	FALSE
cg18456349	chr5	271681	271682	PDCD6	10016	-53	CGI	TRUE	FALSE	FALSE
cg18615402	chr5	176011567	176011568	GPRIN1	114787	25562	CGI	FALSE	TRUE	FALSE
cg18640183	chr5	131563610	131563611	P4HA2	8974	-53	CGI	TRUE	FALSE	FALSE
cg19472282	chr5	74907124	74907125	COL4A3BP	10087	-99317	CGI-N-Shore	TRUE	FALSE	FALSE
cg19510792	chr5	16935695	16935696	MYO10	4651	688	CGI	FALSE	TRUE	FALSE
cg19755108	chr5	176434079	176434080	UIMC1	51720	-283	CGI-S-Shore	TRUE	FALSE	FALSE
cg19885761	chr5	175223646	175223647	CPLX2	10814	35	CGI-N-Shore	TRUE	FALSE	FALSE
cg20403557	chr5	115299088	115299089	AQPEP	206338	936	CGI	TRUE	TRUE	FALSE
cg20405584	chr5	41870875	41870876	OXCT1	5019	-83	CGI	TRUE	FALSE	FALSE
cg21115484	chr5	170814542	170814543	NPM1	4869	-164	CGI	TRUE	FALSE	FALSE
cg21153697	chr5	87437337	87437338	TMEM161B	153396	127326	CGI	FALSE	FALSE	TRUE
cg21199406	chr5	76250201	76250202	CRHBP	1393	1520	CGI	FALSE	TRUE	FALSE
cg21502771	chr5	32173527	32173528	GOLPH3	64083	896	CGI	FALSE	TRUE	FALSE
cg21950561	chr5	61699692	61699693	DIMT1	27292	34	CGI	TRUE	FALSE	FALSE
cg22010052	chr5	115298704	115298705	AQPEP	206338	552	CGI	TRUE	FALSE	FALSE
cg22172610	chr5	79141661	79141662	MTX3	345778	145425	Non-CGI	FALSE	FALSE	TRUE
cg22520791	chr5	178784097	178784098	ADAMTS2	9509	-11665	Non-CGI	FALSE	FALSE	TRUE
cg23006133	chr5	10563856	10563857	ANKRD33B	651746	-577	CGI	TRUE	FALSE	FALSE
cg23359276	chr5	140855504	140855505	PCDHGC3	5098	-63	CGI	TRUE	TRUE	FALSE
cg23378706	chr5	81047486	81047487	SSBP2	23635	-413	CGI	TRUE	FALSE	FALSE
cg23495748	chr5	175223636	175223637	CPLX2	10814	25	CGI-N-Shore	TRUE	FALSE	FALSE
cg23950714	chr5	176935364	176935365	DOK3	79930	2061	CGI	TRUE	TRUE	FALSE
cg24799047	chr5	180632251	180632252	TRIM7	81786	-73	CGI	TRUE	FALSE	FALSE
cg24953228	chr5	3288679	3288680	LOC285577	285577	247527	CGI	FALSE	FALSE	TRUE
cg24963147	chr5	135529341	135529342	LOC389332	389332	-489	CGI-S-Shore	TRUE	FALSE	FALSE
cg25129346	chr5	68665436	68665437	RAD17	5884	311	CGI	TRUE	TRUE	FALSE
cg25337069	chr5	137878958	137878959	ETF1	2107	-25	CGI	TRUE	FALSE	FALSE
cg25358565	chr5	93447407	93447408	FAM172A	83989	-2	CGI	TRUE	FALSE	FALSE
cg25409499	chr5	176170374	176170375	UNC5A	90249	-67184	CGI	FALSE	FALSE	TRUE
cg25443851	chr5	87991388	87991389	LINC00461	645323	-10767	CGI	FALSE	FALSE	TRUE
cg25518571	chr5	1286042	1286043	TERT	7015	9118	CGI-S-Shore	FALSE	TRUE	FALSE
cg25552435	chr5	178017300	178017301	COL23A1	91522	254	CGI	TRUE	FALSE	FALSE
cg25691754	chr5	140027351	140027352	NDUFA2	4695	17	CGI	TRUE	FALSE	FALSE
cg26072250	chr5	443457	443458	EXOC3	11336	122	CGI	TRUE	TRUE	FALSE
cg26092471	chr5	174150712	174150713	MSX2	4488	-861	CGI	TRUE	FALSE	FALSE
cg26103104	chr5	139490895	139490896	PURA	5813	-2811	CGI-S-Shore	FALSE	FALSE	TRUE
cg26208575	chr5	137673667	137673668	CDC25C	995	375	CGI	TRUE	TRUE	FALSE
cg26419426	chr5	110074663	110074664	SLC25A46	91137	800	CGI	TRUE	TRUE	FALSE
cg26453517	chr5	178283861	178283862	ZNF354B	117608	-3091	CGI-N-Shelf	FALSE	FALSE	TRUE
cg26485174	chr5	159200676	159200677	ADRA1B	147	-143062	CGI	FALSE	FALSE	TRUE
cg26584337	chr5	139128295	139128296	PSD2	84249	-47109	CGI	FALSE	FALSE	TRUE
cg26624794	chr5	172332685	172332686	LOC100268168	100268168	53684	CGI	FALSE	TRUE	FALSE
cg26654040	chr5	74536793	74536794	ANKRD31	256006	-4089	CGI-S-Shelf	FALSE	FALSE	TRUE
cg26861946	chr5	31193985	31193986	CDH6	1004	222	CGI	TRUE	FALSE	FALSE
cg26884276	chr5	139554806	139554807	CYSTM1	84418	152	CGI	TRUE	FALSE	FALSE
cg27090201	chr5	134914717	134914718	CXCL14	9547	250	CGI	TRUE	FALSE	FALSE
cg27323088	chr5	89770393	89770394	MBLAC2	153364	190	CGI	TRUE	FALSE	FALSE
cg00082491	chr6	31633028	31633029	CSNK2B	1460	-627	CGI	TRUE	TRUE	FALSE
cg00205058	chr6	168481256	168481257	FRMD1	79981	-1416	CGI	TRUE	FALSE	FALSE
cg00482994	chr6	32945234	32945235	BRD2	6046	8796	Non-CGI	FALSE	TRUE	FALSE
cg00529053	chr6	158589440	158589441	GTF2H5	404672	60	CGI	TRUE	TRUE	FALSE
cg00675838	chr6	97285024	97285025	GPR63	81491	327	CGI	FALSE	TRUE	FALSE
cg00777968	chr6	32811647	32811648	LOC100507463	100507463	-214	CGI	TRUE	TRUE	FALSE
cg00847892	chr6	138188446	138188447	TNFAIP3	7128	-133	CGI	TRUE	TRUE	FALSE
cg01015199	chr6	53409878	53409879	GCLC	2729	47	CGI	TRUE	FALSE	FALSE
cg01059669	chr6	134496004	134496005	HMGA1P7	387065	-57185	CGI	TRUE	TRUE	FALSE
cg01349687	chr6	96025457	96025458	MANEA	79694	83	CGI	TRUE	FALSE	FALSE
cg01392338	chr6	41888869	41888870	MED20	9477	6	CGI	TRUE	FALSE	FALSE
cg01742627	chr6	28911468	28911469	TRIM27	5987	-19699	CGI	TRUE	FALSE	FALSE
cg01792368	chr6	131456785	131456786	AKAP7	9465	-39	CGI	TRUE	FALSE	FALSE
cg01813649	chr6	116421855	116421856	NT5DC1	221294	-142	CGI	TRUE	FALSE	FALSE
cg01815076	chr6	8435968	8435969	LOC100506207	100506207	111	CGI	TRUE	FALSE	FALSE
cg02000145	chr6	31509402	31509403	SNORD84	692199	-446	CGI	TRUE	TRUE	FALSE
cg02004621	chr6	43027301	43027302	MRPL2	51069	-58	CGI	TRUE	TRUE	FALSE
cg02029091	chr6	166756042	166756043	SFT2D1	113402	-50	CGI	TRUE	FALSE	FALSE
cg02238556	chr6	32164160	32164161	GPSM3	63940	-859	CGI	TRUE	TRUE	FALSE
cg02433564	chr6	37673335	37673336	MDGA1	266727	-7568	CGI	FALSE	FALSE	TRUE
cg02442745	chr6	52535943	52535944	TMEM14A	28978	58	CGI	TRUE	FALSE	FALSE
cg02444156	chr6	168919936	168919937	SMOC2	64094	78104	CGI	FALSE	TRUE	FALSE
cg02504465	chr6	108582065	108582066	SNX3	8724	397	CGI	TRUE	FALSE	FALSE
cg02652768	chr6	31697688	31697689	DDAH2	23564	349	CGI	TRUE	TRUE	FALSE
cg02690609	chr6	127441060	127441061	RSPO3	84870	1011	CGI	TRUE	TRUE	FALSE
cg02692313	chr6	33048444	33048445	HLA-DPA1	3113	109	CGI	TRUE	TRUE	FALSE
cg02697107	chr6	144333219	144333220	HYMAI	57061	-3351	CGI-S-Shelf	FALSE	TRUE	FALSE
cg02741419	chr6	31670760	31670761	MIR4646	100616230	-1891	CGI	TRUE	TRUE	FALSE
cg02812408	chr6	25153566	25153567	CMAHP	8418	13225	CGI	FALSE	TRUE	FALSE
cg02837122	chr6	35490787	35490788	TULP1	7287	-10139	Non-CGI	FALSE	FALSE	TRUE
cg02958551	chr6	32975700	32975701	HLA-DOA	3111	1687	CGI-N-Shore	FALSE	TRUE	FALSE
cg03186339	chr6	108439752	108439753	OSTM1	28962	-43810	CGI	FALSE	FALSE	TRUE
cg03441461	chr6	30585666	30585667	MRPS18B	28973	179	CGI	TRUE	FALSE	FALSE
cg03542248	chr6	33266907	33266908	RGL2	5863	256	CGI	TRUE	FALSE	FALSE
cg03679544	chr6	155537972	155537973	CLDN20	49861	-47173	CGI-N-Shelf	TRUE	TRUE	FALSE
cg03686959	chr6	30520989	30520990	PRR3	80742	-3495	CGI-N-Shelf	FALSE	TRUE	FALSE
cg03758774	chr6	32936478	32936479	BRD2	6046	40	CGI	TRUE	FALSE	FALSE
cg03810326	chr6	43230937	43230938	TTBK1	84630	19714	CGI	TRUE	TRUE	FALSE
cg03922146	chr6	30656499	30656500	PPP1R18	170954	-826	CGI-S-Shore	TRUE	TRUE	FALSE
cg04057037	chr6	29600203	29600204	GABBR1	2550	757	CGI	TRUE	TRUE	FALSE
cg04112539	chr6	7107936	7107937	RREB1	6239	105	CGI	TRUE	FALSE	FALSE
cg04329454	chr6	33561099	33561100	LINC00336	401253	14	CGI	TRUE	FALSE	FALSE
cg04332235	chr6	74363879	74363880	SLC17A5	26503	-141	CGI	TRUE	FALSE	FALSE
cg05021923	chr6	18387560	18387561	RNF144B	255488	-19	CGI	TRUE	FALSE	FALSE
cg05093836	chr6	30594590	30594591	ATAT1	79969	-21	CGI-N-Shore	TRUE	FALSE	FALSE
cg05140895	chr6	41514099	41514100	FOXP4	116113	-63	CGI	TRUE	FALSE	FALSE
cg05239791	chr6	31707956	31707957	MSH5-SAPCD1	100532732	230	CGI	TRUE	TRUE	FALSE
cg05302825	chr6	170024559	170024560	WDR27	253769	77598	CGI	FALSE	TRUE	FALSE
cg05310613	chr6	139456890	139456891	HECA	51696	640	CGI	FALSE	TRUE	FALSE
cg05468429	chr6	7248862	7248863	SSR1	6745	64677	CGI-S-Shore	FALSE	TRUE	FALSE
cg05564625	chr6	116892562	116892563	RWDD1	51389	-19	CGI	TRUE	FALSE	FALSE
cg05809174	chr6	10723406	10723407	TMEM14C	51522	257	CGI	TRUE	FALSE	FALSE
cg05871997	chr6	56819623	56819624	BEND6	221336	-148	CGI	TRUE	FALSE	FALSE
cg05923072	chr6	74405909	74405910	CD109	135228	400	CGI	TRUE	FALSE	FALSE
cg06228491	chr6	1578330	1578331	FOXC1	2296	-32349	CGI-N-Shelf	FALSE	FALSE	TRUE
cg06286701	chr6	37025156	37025157	FGD2	221472	51732	Non-CGI	FALSE	FALSE	TRUE
cg06352039	chr6	33240024	33240025	RPS18	6222	171	CGI	TRUE	TRUE	FALSE
cg06444195	chr6	168502888	168502889	FRMD1	79981	-23048	CGI-S-Shore	FALSE	FALSE	TRUE
cg06493072	chr6	158142801	158142802	SNX9	51429	-101491	CGI	FALSE	FALSE	TRUE
cg06512858	chr6	21596796	21596797	SOX4	6659	2823	CGI	TRUE	FALSE	FALSE
cg06529343	chr6	153324256	153324257	MTRF1L	54516	-330	CGI	TRUE	FALSE	FALSE
cg06535942	chr6	107435516	107435517	BEND3	57673	118	CGI	TRUE	FALSE	FALSE
cg06713521	chr6	7313605	7313606	SSR1	6745	-63	CGI	TRUE	FALSE	FALSE
cg06753439	chr6	33245488	33245489	B3GALT4	8705	570	CGI	TRUE	FALSE	FALSE
cg06892152	chr6	38670967	38670968	GLO1	2739	-14	CGI	TRUE	FALSE	FALSE
cg06933031	chr6	32940391	32940392	BRD2	6046	3953	CGI	TRUE	TRUE	FALSE
cg07002622	chr6	118822466	118822467	BRD7P3	23629	-68	Non-CGI	TRUE	TRUE	FALSE
cg07198887	chr6	16217234	16217235	GMPR	2766	-21575	CGI	FALSE	FALSE	TRUE
cg07417146	chr6	33400528	33400529	SYNGAP1	8831	12680	Non-CGI	FALSE	TRUE	FALSE
cg07519536	chr6	26501950	26501951	BTN1A1	696	491	CGI	FALSE	TRUE	FALSE
cg07537819	chr6	156886127	156886128	ARID1B	57492	-212935	CGI	FALSE	FALSE	TRUE
cg08029996	chr6	153451869	153451870	RGS17	26575	518	CGI	FALSE	TRUE	FALSE
cg08049061	chr6	31649364	31649365	LY6G5C	80741	2451	CGI	TRUE	TRUE	FALSE
cg08105748	chr6	57086875	57086876	RAB23	51715	224	CGI	TRUE	TRUE	FALSE
cg08290993	chr6	30654736	30654737	PPP1R18	170954	934	CGI	TRUE	TRUE	FALSE
cg08320628	chr6	139456248	139456249	HECA	51696	0	CGI	TRUE	FALSE	FALSE
cg08351785	chr6	32815831	32815832	PSMB8	5696	-3118	CGI-S-Shelf	FALSE	TRUE	FALSE
cg08511084	chr6	10838833	10838834	MAK	4117	-44	CGI	TRUE	TRUE	FALSE
cg08699935	chr6	19805018	19805019	ID4	3400	-32597	CGI	TRUE	FALSE	FALSE
cg08719551	chr6	30876159	30876160	GTF2H4	2968	181	CGI	TRUE	FALSE	FALSE
cg08762424	chr6	31275881	31275882	HLA-C	3107	-35967	CGI	FALSE	TRUE	FALSE
cg08792185	chr6	31855422	31855423	SLC44A4	80736	-8598	CGI-N-Shore	FALSE	TRUE	FALSE
cg08864245	chr6	33395936	33395937	SYNGAP1	8831	8088	CGI	FALSE	TRUE	FALSE
cg08951901	chr6	32052293	32052294	TNXB	7148	33176	CGI-N-Shelf	FALSE	TRUE	FALSE
cg09384159	chr6	112408580	112408581	FAM229B	619208	-92	CGI	TRUE	TRUE	FALSE
cg09415832	chr6	33422185	33422186	ZBTB9	221504	-169	CGI	TRUE	FALSE	FALSE
cg09561029	chr6	3273364	3273365	PSMG4	389362	14201	CGI	FALSE	TRUE	FALSE
cg09602288	chr6	10382800	10382801	LOC100130275	100130275	-29749	CGI	FALSE	FALSE	TRUE
cg09700990	chr6	90122154	90122155	RRAGD	58528	-158	CGI	TRUE	FALSE	FALSE
cg09706029	chr6	33266089	33266090	RGL2	5863	1074	CGI-N-Shore	TRUE	TRUE	FALSE
cg09739890	chr6	31515296	31515297	NFKBIL1	4795	667	Non-CGI	TRUE	TRUE	FALSE
cg10069579	chr6	33217286	33217287	HCG25	414765	-25	CGI	TRUE	FALSE	FALSE
cg10442148	chr6	30294852	30294853	HCG18	414777	73	CGI	TRUE	TRUE	FALSE
cg10443195	chr6	114663570	114663571	HS3ST5	222537	-29	CGI	TRUE	FALSE	FALSE
cg10631694	chr6	109704005	109704006	CD164	8763	-242	CGI	TRUE	FALSE	FALSE
cg10709727	chr6	31698145	31698146	DDAH2	23564	-105	CGI	TRUE	FALSE	FALSE
cg10726394	chr6	157098467	157098468	ARID1B	57492	-595	CGI	TRUE	FALSE	FALSE
cg10816283	chr6	46871173	46871174	GPR116	221395	51500	Non-CGI	TRUE	TRUE	FALSE
cg10903903	chr6	27647843	27647844	LOC100507173	100507173	-13969	CGI	FALSE	FALSE	TRUE
cg10909502	chr6	71122960	71122961	FAM135A	57579	-145	CGI	TRUE	FALSE	FALSE
cg11084086	chr6	17281802	17281803	RBM24	221662	-5	CGI	TRUE	FALSE	FALSE
cg11154666	chr6	31599532	31599533	SNORA38	677820	8675	CGI-N-Shore	FALSE	TRUE	FALSE
cg11379888	chr6	170102082	170102083	WDR27	253769	75	CGI	TRUE	FALSE	FALSE
cg11406216	chr6	158497842	158497843	SERAC1	84947	91468	CGI	FALSE	TRUE	FALSE
cg11452354	chr6	44187052	44187053	SLC29A1	2030	-188	CGI-N-Shore	TRUE	FALSE	FALSE
cg11478200	chr6	1608667	1608668	FOXC1	2296	-2012	CGI	FALSE	FALSE	TRUE
cg11785509	chr6	160148797	160148798	WTAP	9589	667	CGI	FALSE	TRUE	FALSE
cg11824369	chr6	13574863	13574864	SIRT5	23408	101	CGI	TRUE	TRUE	FALSE
cg11897209	chr6	86302888	86302889	SNX14	57231	739	CGI-N-Shore	FALSE	TRUE	FALSE
cg11939283	chr6	3752426	3752427	PXDC1	221749	-179	CGI	TRUE	FALSE	FALSE
cg11983857	chr6	5145532	5145533	MIR3691	100500900	3022	CGI-N-Shore	FALSE	TRUE	FALSE
cg12214665	chr6	138188557	138188558	TNFAIP3	7128	-22	CGI	TRUE	TRUE	FALSE
cg12305265	chr6	162065571	162065572	AGPAT4	56895	-370463	CGI-N-Shore	FALSE	TRUE	FALSE
cg12383181	chr6	38608024	38608025	BTBD9	114781	-99	CGI	TRUE	FALSE	FALSE
cg12435584	chr6	107780425	107780426	PDSS2	57107	352	CGI	TRUE	TRUE	FALSE
cg12482260	chr6	97345915	97345916	NDUFAF4	29078	-147	CGI	TRUE	FALSE	FALSE
cg12764611	chr6	90635163	90635164	GJA10	84694	30974	CGI	FALSE	FALSE	TRUE
cg12909932	chr6	28984654	28984655	ZNF311	282890	-11560	CGI	FALSE	FALSE	TRUE
cg12938565	chr6	74020018	74020019	C6orf147	387097	68	CGI	TRUE	TRUE	FALSE
cg13177375	chr6	28864820	28864821	TRIM27	5987	26946	CGI	TRUE	FALSE	FALSE
cg13611934	chr6	30313121	30313122	RPP21	79897	214	CGI	TRUE	TRUE	FALSE
cg13651857	chr6	117002099	117002100	KPNA5	3841	-266	CGI	TRUE	FALSE	FALSE
cg13678070	chr6	38670972	38670973	GLO1	2739	-19	CGI	TRUE	FALSE	FALSE
cg13782301	chr6	32116875	32116876	PRRT1	80863	3983	CGI	FALSE	TRUE	FALSE
cg13806231	chr6	31774610	31774611	LSM2	57819	149	CGI	TRUE	FALSE	FALSE
cg13875840	chr6	33129388	33129389	COL11A2	1302	30855	CGI	FALSE	FALSE	TRUE
cg13939462	chr6	36843324	36843325	PPIL1	51645	-523	CGI-S-Shore	TRUE	TRUE	FALSE
cg14030282	chr6	31461999	31462000	MICB	4277	-657	CGI	TRUE	FALSE	FALSE
cg14128634	chr6	149068974	149068975	UST	10090	702	CGI	FALSE	TRUE	FALSE
cg14271504	chr6	12011181	12011182	HIVEP1	3096	-1541	CGI	TRUE	FALSE	FALSE
cg14366571	chr6	166722062	166722063	PRR18	285800	-190	CGI	TRUE	FALSE	FALSE
cg14518907	chr6	31860292	31860293	EHMT2	10919	5170	CGI-S-Shelf	FALSE	TRUE	FALSE
cg14531663	chr6	32116933	32116934	PRRT1	80863	3925	CGI	FALSE	TRUE	FALSE
cg14653643	chr6	80247256	80247257	LCA5	167691	-108	CGI	TRUE	FALSE	FALSE
cg14741685	chr6	74098812	74098813	DDX43	55510	-5471	CGI	FALSE	TRUE	FALSE
cg14746369	chr6	33290934	33290935	DAXX	1616	-140	CGI	TRUE	FALSE	FALSE
cg14746738	chr6	149887876	149887877	GINM1	116254	347	CGI	FALSE	TRUE	FALSE
cg14851271	chr6	32919431	32919432	HLA-DMA	3108	1466	Non-CGI	FALSE	TRUE	FALSE
cg15038512	chr6	170123185	170123186	PHF10	55274	919	CGI	FALSE	TRUE	FALSE
cg15416661	chr6	28725789	28725790	LOC401242	401242	105663	CGI	FALSE	FALSE	TRUE
cg15574924	chr6	31588206	31588207	PRRC2A	7916	-242	CGI	TRUE	FALSE	FALSE
cg15664069	chr6	2989243	2989244	DKFZP686I15217	401232	1041	CGI	FALSE	TRUE	FALSE
cg15689570	chr6	37321673	37321674	RNF8	9025	-73	CGI	TRUE	FALSE	FALSE
cg15745284	chr6	32064923	32064924	TNXB	7148	20546	CGI	FALSE	TRUE	FALSE
cg15876657	chr6	144416565	144416566	SF3B5	83443	187	CGI	TRUE	FALSE	FALSE
cg16058774	chr6	107349438	107349439	C6orf203	51250	30	CGI	TRUE	FALSE	FALSE
cg16120501	chr6	129513939	129513940	LAMA2	3908	309652	Non-CGI	FALSE	TRUE	FALSE
cg16271017	chr6	7726349	7726350	BMP6	654	-660	CGI	TRUE	FALSE	FALSE
cg16287766	chr6	34495124	34495125	SPDEF	25803	28984	CGI	FALSE	TRUE	FALSE
cg16463733	chr6	33422266	33422267	ZBTB9	221504	-88	CGI	TRUE	FALSE	FALSE
cg16562445	chr6	33379050	33379051	PHF1	5252	276	CGI	FALSE	TRUE	FALSE
cg16620382	chr6	43211213	43211214	TTBK1	84630	-7	CGI	TRUE	FALSE	FALSE
cg16643840	chr6	391664	391665	IRF4	3662	-73	CGI	TRUE	FALSE	FALSE
cg16669877	chr6	44041170	44041171	MRPL14	64928	54019	CGI	FALSE	TRUE	FALSE
cg16928323	chr6	13014053	13014054	LOC100130357	100130357	281763	CGI	FALSE	TRUE	FALSE
cg16958939	chr6	7225223	7225224	SSR1	6745	88316	Non-CGI	FALSE	TRUE	FALSE
cg17040800	chr6	134274286	134274287	TBPL1	9519	977	CGI	TRUE	TRUE	FALSE
cg17162475	chr6	74162074	74162075	MB21D1	115004	-30	CGI	TRUE	FALSE	FALSE
cg17319109	chr6	31926586	31926587	SKIV2L	6499	4	CGI	TRUE	TRUE	FALSE
cg17635724	chr6	99963449	99963450	USP45	85015	-140	CGI	TRUE	FALSE	FALSE
cg17752595	chr6	2765499	2765500	WRNIP1	56897	-165	CGI	TRUE	FALSE	FALSE
cg17760405	chr6	100915191	100915192	SIM1	6492	-2385	CGI	FALSE	FALSE	TRUE
cg17767285	chr6	84419202	84419203	SNAP91	9892	-74	CGI	TRUE	FALSE	FALSE
cg17945153	chr6	41978288	41978289	CCND3	896	38320	Non-CGI	FALSE	TRUE	FALSE
cg17947140	chr6	37787739	37787740	ZFAND3	60685	431	CGI	TRUE	FALSE	FALSE
cg17947992	chr6	2510180	2510181	C6orf195	154386	125116	CGI-N-Shore	FALSE	FALSE	TRUE
cg18176689	chr6	32164147	32164148	GPSM3	63940	-846	CGI	TRUE	TRUE	FALSE
cg18261461	chr6	138725231	138725232	HEBP2	23593	-103	CGI	TRUE	FALSE	FALSE
cg18281824	chr6	31939884	31939885	DOM3Z	1797	146	CGI	TRUE	TRUE	FALSE
cg18327128	chr6	30079139	30079140	TRIM31	11074	1726	CGI-N-Shore	FALSE	TRUE	FALSE
cg18357526	chr6	26021779	26021780	HIST1H4A	8359	-126	CGI-S-Shore	TRUE	FALSE	FALSE
cg18419694	chr6	143832440	143832441	FUCA2	2519	578	CGI	FALSE	TRUE	FALSE
cg18472945	chr6	32937376	32937377	BRD2	6046	938	CGI	TRUE	TRUE	FALSE
cg18514573	chr6	21610423	21610424	SOX4	6659	16450	CGI	FALSE	FALSE	TRUE
cg18694169	chr6	28227079	28227080	NKAPL	222698	-17	CGI	TRUE	FALSE	FALSE
cg18832902	chr6	30029443	30029444	ZNRD1-AS1	80862	-25	CGI	TRUE	TRUE	FALSE
cg18956706	chr6	43214850	43214851	TTBK1	84630	3627	CGI	FALSE	TRUE	FALSE
cg19155471	chr6	10172059	10172060	LOC100130275	100130275	-240490	CGI	FALSE	TRUE	FALSE
cg19365062	chr6	127440000	127440001	RSPO3	84870	-46	CGI	TRUE	TRUE	FALSE
cg19376189	chr6	30313316	30313317	RPP21	79897	409	CGI	FALSE	TRUE	FALSE
cg19494464	chr6	28891064	28891065	TRIM27	5987	702	CGI	TRUE	FALSE	FALSE
cg19556079	chr6	31632838	31632839	CSNK2B	1460	-817	CGI	TRUE	TRUE	FALSE
cg19820543	chr6	168120556	168120557	C6orf123	26238	76981	CGI-N-Shore	FALSE	FALSE	TRUE
cg20147862	chr6	2634573	2634574	C6orf195	154386	723	CGI	FALSE	TRUE	FALSE
cg20185360	chr6	133119641	133119642	SLC18B1	116843	104	CGI	TRUE	FALSE	FALSE
cg20300129	chr6	35058181	35058182	TCP11	6954	51004	Non-CGI	FALSE	TRUE	FALSE
cg20334627	chr6	130686697	130686698	SAMD3	154075	-126	CGI	TRUE	FALSE	FALSE
cg20738959	chr6	30539641	30539642	ABCF1	23	470	CGI-S-Shore	FALSE	TRUE	FALSE
cg21205032	chr6	31633393	31633394	CSNK2B	1460	-262	CGI	TRUE	TRUE	FALSE
cg21387735	chr6	166908379	166908380	MIR1913	100302141	14540	CGI	FALSE	TRUE	FALSE
cg21707172	chr6	155537944	155537945	CLDN20	49861	-47201	CGI-N-Shelf	TRUE	TRUE	FALSE
cg22009551	chr6	31670806	31670807	MIR4646	100616230	-1937	CGI	TRUE	TRUE	FALSE
cg22330763	chr6	44194767	44194768	SLC29A1	2030	7524	CGI-S-Shelf	FALSE	TRUE	FALSE
cg22376415	chr6	150326323	150326324	RAET1K	646024	-42	CGI	TRUE	FALSE	FALSE
cg22783602	chr6	33240120	33240121	RPS18	6222	267	CGI	TRUE	TRUE	FALSE
cg22850066	chr6	30313042	30313043	RPP21	79897	135	CGI	TRUE	TRUE	FALSE
cg22875823	chr6	33400543	33400544	SYNGAP1	8831	12695	Non-CGI	FALSE	TRUE	FALSE
cg23066587	chr6	170500942	170500943	LOC154449	154449	70713	CGI	FALSE	FALSE	TRUE
cg23082428	chr6	28849220	28849221	LOC401242	401242	-17765	CGI	TRUE	FALSE	FALSE
cg23244761	chr6	161796850	161796851	AGPAT4	56895	-101742	Non-CGI	FALSE	TRUE	FALSE
cg23278060	chr6	83777448	83777449	DOPEY1	23033	62	CGI	TRUE	FALSE	FALSE
cg23351030	chr6	31549043	31549044	LTB	4050	1157	CGI	FALSE	TRUE	FALSE
cg23363014	chr6	30227800	30227801	HLA-L	3139	460	CGI	TRUE	TRUE	FALSE
cg23388085	chr6	1595741	1595742	FOXC1	2296	-14938	CGI	FALSE	FALSE	TRUE
cg23390397	chr6	109777103	109777104	MICAL1	64780	10066	CGI	TRUE	TRUE	FALSE
cg23467008	chr6	152128537	152128538	ESR1	2099	116905	CGI	TRUE	TRUE	FALSE
cg23506204	chr6	28984583	28984584	ZNF311	282890	-11489	CGI	FALSE	FALSE	TRUE
cg23641315	chr6	31828373	31828374	NEU1	4758	2334	CGI-N-Shore	FALSE	TRUE	FALSE
cg23768510	chr6	33281821	33281822	TAPBP	6892	341	CGI	TRUE	FALSE	FALSE
cg23879496	chr6	43749477	43749478	VEGFA	7422	11530	CGI-N-Shelf	FALSE	TRUE	FALSE
cg23979795	chr6	27573467	27573468	LOC100507173	100507173	-88345	CGI	TRUE	FALSE	FALSE
cg24040346	chr6	106533925	106533926	PRDM1	639	-268	CGI-N-Shore	TRUE	FALSE	FALSE
cg24289452	chr6	170231220	170231221	LINC00242	401288	-32298	CGI-N-Shore	FALSE	FALSE	TRUE
cg24328964	chr6	33290965	33290966	DAXX	1616	-171	CGI	TRUE	FALSE	FALSE
cg24508713	chr6	31870783	31870784	ZBTB12	221527	-1013	CGI	TRUE	TRUE	FALSE
cg24595606	chr6	108492358	108492359	NR2E1	7101	5142	CGI	FALSE	TRUE	FALSE
cg24601517	chr6	5004202	5004203	RPP40	10799	67	CGI	TRUE	TRUE	FALSE
cg24636336	chr6	19805167	19805168	ID4	3400	-32448	CGI	TRUE	FALSE	FALSE
cg24645123	chr6	170764589	170764590	PSMB1	5689	97826	CGI	FALSE	FALSE	TRUE
cg24703168	chr6	28411309	28411310	ZSCAN23	222696	-29	CGI	TRUE	FALSE	FALSE
cg24767041	chr6	32811733	32811734	LOC100507463	100507463	-128	CGI	TRUE	TRUE	FALSE
cg24867279	chr6	28853021	28853022	LOC401242	401242	-21566	CGI	FALSE	FALSE	TRUE
cg24990131	chr6	6320710	6320711	F13A1	2162	212	CGI	FALSE	TRUE	FALSE
cg25028035	chr6	42016671	42016672	CCND3	896	-60	CGI	TRUE	FALSE	FALSE
cg25029615	chr6	56954784	56954785	ZNF451	26036	-42	CGI	TRUE	FALSE	FALSE
cg25043633	chr6	170061104	170061105	WDR27	253769	41053	CGI	TRUE	TRUE	FALSE
cg25091829	chr6	116601170	116601171	TSPYL1	7259	108	CGI	TRUE	TRUE	FALSE
cg25145715	chr6	31619920	31619921	APOM	55937	-299	CGI	TRUE	TRUE	FALSE
cg25343990	chr6	125684545	125684546	HDDC2	51020	-61262	CGI	FALSE	FALSE	TRUE
cg25361447	chr6	33264834	33264835	RGL2	5863	2329	CGI-N-Shore	TRUE	TRUE	FALSE
cg25543316	chr6	137540615	137540616	IFNGR1	3459	-47	CGI	TRUE	FALSE	FALSE
cg25631414	chr6	169641941	169641942	THBS2	7058	12194	CGI	FALSE	TRUE	FALSE
cg25661132	chr6	157802429	157802430	ZDHHC14	79683	-126	CGI	TRUE	FALSE	FALSE
cg25774457	chr6	29600114	29600115	GABBR1	2550	846	CGI	TRUE	TRUE	FALSE
cg25982965	chr6	44253910	44253911	TCTE1	202500	11546	CGI-N-Shore	FALSE	TRUE	FALSE
cg26030457	chr6	168760476	168760477	DACT2	168002	-40073	CGI	FALSE	FALSE	TRUE
cg26187061	chr6	24775647	24775648	GMNN	51053	487	CGI	TRUE	TRUE	FALSE
cg26245667	chr6	155317242	155317243	TIAM2	26230	163410	CGI-S-Shore	FALSE	TRUE	FALSE
cg26270195	chr6	33245553	33245554	B3GALT4	8705	635	CGI	TRUE	FALSE	FALSE
cg26279783	chr6	33143356	33143357	COL11A2	1302	16887	Non-CGI	FALSE	TRUE	FALSE
cg26298272	chr6	107780267	107780268	PDSS2	57107	510	CGI	TRUE	TRUE	FALSE
cg26332258	chr6	29720425	29720426	IFITM4P	340198	-1499	CGI	TRUE	FALSE	FALSE
cg26418137	chr6	30070059	30070060	TRIM31	11074	10806	CGI	FALSE	FALSE	TRUE
cg26423041	chr6	4794490	4794491	CDYL	9425	88096	Non-CGI	FALSE	TRUE	FALSE
cg26481402	chr6	28853050	28853051	LOC401242	401242	-21595	CGI	FALSE	FALSE	TRUE
cg26511326	chr6	43399379	43399380	ABCC10	89845	4086	CGI-S-Shelf	TRUE	TRUE	FALSE
cg26789922	chr6	30014872	30014873	ZNRD1	30834	-14162	Non-CGI	FALSE	TRUE	FALSE
cg26919618	chr6	33286790	33286791	ZBTB22	9278	-1070	CGI-S-Shore	TRUE	TRUE	FALSE
cg26973414	chr6	169290629	169290630	THBS2	7058	363506	CGI	FALSE	FALSE	TRUE
cg27324402	chr6	21587710	21587711	SOX4	6659	-6260	CGI	FALSE	FALSE	TRUE
cg27363327	chr6	43211208	43211209	TTBK1	84630	-12	CGI	TRUE	FALSE	FALSE
cg27449352	chr6	97285386	97285387	GPR63	81491	-32	CGI	TRUE	FALSE	FALSE
cg27475365	chr6	125476259	125476260	TPD52L1	7164	1379	CGI-S-Shore	FALSE	TRUE	FALSE
cg27637948	chr6	168226540	168226541	MLLT4-AS1	653483	934	CGI	TRUE	FALSE	FALSE
cg00225603	chr7	20865639	20865640	RPL23P8	222901	-1276	Non-CGI	TRUE	FALSE	FALSE
cg00357238	chr7	124570053	124570054	POT1	25913	-15	CGI	TRUE	FALSE	FALSE
cg00415263	chr7	26331488	26331489	SNX10	29887	-25	CGI	TRUE	FALSE	FALSE
cg00516639	chr7	150949183	150949184	MIR671	768213	13675	CGI	FALSE	TRUE	FALSE
cg00992090	chr7	613222	613223	FLJ44511	441307	53193	CGI	FALSE	TRUE	FALSE
cg01106412	chr7	25020404	25020405	OSBPL3	26031	-643	CGI	TRUE	FALSE	FALSE
cg01271455	chr7	157362062	157362063	MIR153-2	406945	5050	CGI-S-Shore	FALSE	TRUE	FALSE
cg01275887	chr7	4747216	4747217	FOXK1	221937	63827	CGI	FALSE	TRUE	FALSE
cg01386335	chr7	17704951	17704952	SNX13	23161	275178	Non-CGI	FALSE	FALSE	TRUE
cg01410440	chr7	157193063	157193064	DNAJB6	10049	63352	CGI	FALSE	TRUE	FALSE
cg01445942	chr7	72847976	72847977	FZD9	8326	-131	CGI	TRUE	FALSE	FALSE
cg01642827	chr7	925664	925665	GET4	51608	34076	CGI-S-Shore	FALSE	TRUE	FALSE
cg01704862	chr7	150780657	150780658	TMUB1	83590	-36	CGI	TRUE	FALSE	FALSE
cg01877778	chr7	157415538	157415539	MIR153-2	406945	-48423	CGI	FALSE	TRUE	FALSE
cg02041497	chr7	132300110	132300111	PLXNA4	91584	33335	CGI	FALSE	TRUE	FALSE
cg02278766	chr7	139102378	139102379	LOC100129148	100129148	9892	Non-CGI	FALSE	TRUE	FALSE
cg02507480	chr7	112032146	112032147	IFRD1	3475	-31051	CGI	FALSE	FALSE	TRUE
cg02562602	chr7	157694516	157694517	LOC100506585	100506585	47238	CGI	FALSE	TRUE	FALSE
cg02568153	chr7	2184201	2184202	MAD1L1	8379	88380	CGI-S-Shore	FALSE	TRUE	FALSE
cg02653270	chr7	150948861	150948862	MIR671	768213	13353	CGI	FALSE	TRUE	FALSE
cg02803508	chr7	26904455	26904456	SKAP2	8935	130401	CGI	TRUE	TRUE	FALSE
cg02805489	chr7	36406483	36406484	ANLN	54443	-22947	CGI	TRUE	TRUE	FALSE
cg02908720	chr7	127292155	127292156	SND1	27044	-45	CGI	TRUE	FALSE	FALSE
cg02965180	chr7	94285784	94285785	PEG10	23089	146	CGI	TRUE	FALSE	FALSE
cg03251302	chr7	64501077	64501078	CCT6P3	643180	2344	CGI-S-Shore	FALSE	TRUE	FALSE
cg03317820	chr7	1141533	1141534	GPER	2852	19688	CGI	FALSE	TRUE	FALSE
cg03547487	chr7	26240458	26240459	HNRNPA2B1	3181	-44	CGI	TRUE	FALSE	FALSE
cg03678035	chr7	72813946	72813947	FZD9	8326	-34161	Non-CGI	FALSE	FALSE	TRUE
cg03913792	chr7	92466078	92466079	CDK6	1021	-136	CGI	TRUE	FALSE	FALSE
cg03958363	chr7	1587692	1587693	TMEM184A	202915	8372	CGI	FALSE	TRUE	FALSE
cg04099454	chr7	87254300	87254301	RUNDC3B	154661	-3427	CGI-N-Shelf	FALSE	TRUE	FALSE
cg04141610	chr7	558976	558977	PDGFA	5154	503	CGI	TRUE	FALSE	FALSE
cg04298511	chr7	70159330	70159331	WBSCR17	64409	-438457	CGI	FALSE	TRUE	FALSE
cg04430780	chr7	157199439	157199440	DNAJB6	10049	69728	CGI-N-Shore	FALSE	TRUE	FALSE
cg04498913	chr7	1135747	1135748	GPER	2852	13902	CGI	FALSE	TRUE	FALSE
cg04553410	chr7	150864885	150864886	GBX1	2636	-17	CGI	TRUE	FALSE	FALSE
cg04992250	chr7	158049906	158049907	MIR595	693180	275597	CGI-N-Shore	FALSE	TRUE	FALSE
cg05064645	chr7	55086868	55086869	EGFR	1956	142	CGI	TRUE	FALSE	FALSE
cg05128566	chr7	95401838	95401839	DYNC1I1	1780	19	CGI	TRUE	FALSE	FALSE
cg05129523	chr7	42951622	42951623	PSMA2	5683	20181	CGI	TRUE	TRUE	FALSE
cg05252062	chr7	101712308	101712309	SH2B2	10603	-216095	CGI	FALSE	TRUE	FALSE
cg05279413	chr7	1572327	1572328	MAFK	7975	1958	CGI	TRUE	TRUE	FALSE
cg05470643	chr7	155579830	155579831	SHH	6469	25135	CGI-N-Shore	FALSE	FALSE	TRUE
cg05480046	chr7	4856146	4856147	MIR4656	100616465	-27875	CGI	FALSE	TRUE	FALSE
cg05669157	chr7	72742156	72742157	TRIM50	135892	-70	CGI	TRUE	TRUE	FALSE
cg05822926	chr7	8302235	8302236	ICA1	3382	-49	CGI	TRUE	FALSE	FALSE
cg05927438	chr7	128695356	128695357	TPI1P2	286016	78	CGI	TRUE	FALSE	FALSE
cg06023349	chr7	45197329	45197330	RAMP3	10268	-36	CGI	TRUE	FALSE	FALSE
cg06147752	chr7	75189186	75189187	PMS2P3	5387	-31732	CGI	FALSE	TRUE	FALSE
cg06206902	chr7	27191226	27191227	HOXA6	3203	-3832	CGI	TRUE	TRUE	FALSE
cg06387496	chr7	2775674	2775675	AMZ1	155185	56510	CGI	FALSE	TRUE	FALSE
cg06434455	chr7	54826947	54826948	SEC61G	23480	-7	CGI	TRUE	FALSE	FALSE
cg06471548	chr7	192006	192007	FAM20C	56975	-961	CGI	TRUE	FALSE	FALSE
cg06545648	chr7	75544361	75544362	POR	5447	-57	CGI	TRUE	FALSE	FALSE
cg06716246	chr7	100086272	100086273	NYAP1	222950	4721	CGI	TRUE	TRUE	FALSE
cg06757357	chr7	73497746	73497747	LIMK1	3984	-359	CGI	TRUE	FALSE	FALSE
cg06873343	chr7	2667608	2667609	TTYH3	80727	-3993	CGI-N-Shelf	FALSE	FALSE	TRUE
cg07027305	chr7	2059796	2059797	MIR4655	100616160	-175906	CGI	FALSE	TRUE	FALSE
cg07057177	chr7	132261393	132261394	PLXNA4	91584	72052	CGI	TRUE	TRUE	FALSE
cg07106369	chr7	158739902	158739903	LINC00689	154822	-61141	CGI	FALSE	FALSE	TRUE
cg07121182	chr7	99156011	99156012	ZNF655	79027	-32	CGI	TRUE	FALSE	FALSE
cg07194832	chr7	97978655	97978656	BAIAP2L1	55971	51770	Non-CGI	FALSE	TRUE	FALSE
cg07287682	chr7	2281772	2281773	FTSJ2	29960	59	CGI	TRUE	TRUE	FALSE
cg07348339	chr7	2609259	2609260	IQCE	23288	10626	CGI	FALSE	TRUE	FALSE
cg07491203	chr7	155089714	155089715	INSIG1	3638	227	CGI	FALSE	TRUE	FALSE
cg07510175	chr7	1030700	1030701	CYP2W1	54905	7864	CGI-S-Shore	FALSE	FALSE	TRUE
cg07671603	chr7	156433350	156433351	C7orf13	129790	-1	CGI	TRUE	FALSE	FALSE
cg07803375	chr7	811206	811207	PRKAR1B	5575	-43892	CGI-N-Shore	FALSE	TRUE	FALSE
cg08307369	chr7	128379382	128379383	CALU	813	35	CGI	TRUE	FALSE	FALSE
cg08595102	chr7	6414623	6414624	RAC1	5879	496	CGI	FALSE	TRUE	FALSE
cg08692879	chr7	73134111	73134112	STX1A	6804	-93	CGI	TRUE	FALSE	FALSE
cg08786957	chr7	116502443	116502444	CAPZA2	830	51318	CGI-N-Shore	TRUE	TRUE	FALSE
cg09085201	chr7	49708532	49708533	VWC2	375567	-104723	CGI-N-Shore	FALSE	FALSE	TRUE
cg09225287	chr7	80549171	80549172	SEMA3C	10512	2502	CGI-S-Shore	TRUE	TRUE	FALSE
cg09351230	chr7	1473949	1473950	MICALL2	79778	25158	CGI	FALSE	FALSE	TRUE
cg09575322	chr7	148963644	148963645	ZNF783	100289678	4381	CGI	FALSE	TRUE	FALSE
cg09649198	chr7	158134520	158134521	MIR595	693180	190983	CGI	FALSE	TRUE	FALSE
cg09701743	chr7	138776650	138776651	ZC3HAV1	56829	17813	Non-CGI	FALSE	TRUE	FALSE
cg09901100	chr7	134867116	134867117	C7orf49	78996	-11537	CGI	FALSE	FALSE	TRUE
cg09941367	chr7	151074006	151074007	WDR86-AS1	100131176	-32314	CGI	FALSE	TRUE	FALSE
cg10009968	chr7	3033408	3033409	CARD11	84433	50099	CGI	FALSE	TRUE	FALSE
cg10571824	chr7	1963144	1963145	MIR4655	100616160	-79254	CGI-S-Shore	FALSE	TRUE	FALSE
cg10663408	chr7	130021651	130021652	CPA1	1357	1360	CGI	FALSE	TRUE	FALSE
cg10669265	chr7	1709950	1709951	ELFN1	392617	-38846	CGI	FALSE	FALSE	TRUE
cg10883583	chr7	99006392	99006393	PDAP1	11333	-86	CGI	TRUE	FALSE	FALSE
cg10972392	chr7	75885239	75885240	HSPB1	3315	-46634	CGI-N-Shelf	FALSE	TRUE	FALSE
cg10994314	chr7	141251231	141251232	AGK	55750	152	CGI	TRUE	FALSE	FALSE
cg11109374	chr7	79082186	79082187	MAGI2-AS3	100505881	-85	CGI	TRUE	TRUE	FALSE
cg11251690	chr7	1493126	1493127	MICALL2	79778	5981	CGI-S-Shore	TRUE	TRUE	FALSE
cg11344668	chr7	75677322	75677323	STYXL1	51657	0	CGI	TRUE	FALSE	FALSE
cg11531687	chr7	158294592	158294593	MIR595	693180	30911	CGI	FALSE	TRUE	FALSE
cg11573308	chr7	2025483	2025484	MIR4655	100616160	-141593	CGI	FALSE	TRUE	FALSE
cg11582546	chr7	5229738	5229739	WIPI2	26100	-95	CGI	TRUE	FALSE	FALSE
cg11752832	chr7	134001865	134001866	SLC35B4	84912	-37	CGI	TRUE	FALSE	FALSE
cg11983939	chr7	153574	153575	FAM20C	56975	-39393	CGI-S-Shelf	FALSE	TRUE	FALSE
cg12015737	chr7	27184030	27184031	HOXA5	3202	-742	CGI-S-Shore	TRUE	TRUE	FALSE
cg12476065	chr7	134855640	134855641	C7orf49	78996	-61	CGI	TRUE	FALSE	FALSE
cg12481734	chr7	100472507	100472508	SRRT	51593	-192	CGI	TRUE	FALSE	FALSE
cg12566780	chr7	92157604	92157605	PEX1	5189	239	CGI	TRUE	TRUE	FALSE
cg12610972	chr7	94138947	94138948	CASD1	64921	-221	CGI	TRUE	FALSE	FALSE
cg12881726	chr7	30544409	30544410	GGCT	79017	46	CGI	TRUE	FALSE	FALSE
cg12921647	chr7	1336696	1336697	UNCX	340260	64041	CGI	FALSE	FALSE	TRUE
cg13116799	chr7	75957011	75957012	HSPB1	3315	25135	CGI-N-Shore	FALSE	TRUE	FALSE
cg13214121	chr7	157549678	157549679	LOC100506585	100506585	-97597	CGI	FALSE	TRUE	FALSE
cg13525062	chr7	157926529	157926530	LOC100506585	100506585	279251	CGI	FALSE	TRUE	FALSE
cg13578160	chr7	72813978	72813979	FZD9	8326	-34129	Non-CGI	FALSE	FALSE	TRUE
cg13794530	chr7	158937494	158937495	VIPR2	7434	153	CGI	TRUE	FALSE	FALSE
cg13821490	chr7	100798061	100798062	AP1S1	1174	374	CGI	FALSE	TRUE	FALSE
cg14095744	chr7	149559426	149559427	ATP6V0E2	155066	-10629	CGI-S-Shore	FALSE	TRUE	FALSE
cg14521995	chr7	157263638	157263639	MIR153-2	406945	103474	CGI-S-Shore	FALSE	FALSE	TRUE
cg14576616	chr7	91763911	91763912	CYP51A1	1595	44932	CGI	TRUE	TRUE	FALSE
cg15470736	chr7	157056012	157056013	DNAJB6	10049	-73696	CGI-S-Shelf	FALSE	TRUE	FALSE
cg15560632	chr7	100183617	100183618	LRCH4	4034	157	CGI	TRUE	FALSE	FALSE
cg15571730	chr7	99680278	99680279	ZNF3	7551	79	CGI-S-Shore	TRUE	FALSE	FALSE
cg15818120	chr7	150065690	150065691	REPIN1	29803	328	CGI	TRUE	TRUE	FALSE
cg16174274	chr7	148679906	148679907	PDIA4	9601	45874	CGI	FALSE	FALSE	TRUE
cg16329842	chr7	2148642	2148643	MAD1L1	8379	123939	CGI	FALSE	TRUE	FALSE
cg16331920	chr7	15726479	15726480	MEOX2	4223	-170	CGI	TRUE	FALSE	FALSE
cg16938614	chr7	106685021	106685022	PRKAR2B	5577	-155	CGI	TRUE	FALSE	FALSE
cg17170568	chr7	156433406	156433407	RNF32	140545	52	CGI	TRUE	FALSE	FALSE
cg17262025	chr7	12610384	12610385	SCIN	85477	180	CGI	TRUE	TRUE	FALSE
cg17291500	chr7	550508	550509	PDGFA	5154	8971	CGI-N-Shore	FALSE	TRUE	FALSE
cg17315135	chr7	29234965	29234966	CPVL	54504	-72	CGI	TRUE	TRUE	FALSE
cg17541965	chr7	148844604	148844605	ZNF398	57541	21095	CGI	TRUE	TRUE	FALSE
cg17564354	chr7	150675025	150675026	KCNH2	3757	375	CGI	TRUE	FALSE	FALSE
cg17607973	chr7	100027408	100027409	MEPCE	56257	994	CGI	TRUE	TRUE	FALSE
cg17624052	chr7	102985197	102985198	DNAJC2	27000	121	CGI	TRUE	FALSE	FALSE
cg17974780	chr7	73184617	73184618	CLDN3	1365	-16	CGI	TRUE	FALSE	FALSE
cg18092351	chr7	960115	960116	ADAP1	11033	55118	CGI	FALSE	TRUE	FALSE
cg18252515	chr7	66147081	66147082	KCTD7	154881	53212	CGI	TRUE	TRUE	FALSE
cg18339838	chr7	108210215	108210216	DNAJB9	4189	25	CGI	TRUE	FALSE	FALSE
cg18341924	chr7	16684906	16684907	ANKMY2	57037	534	CGI	TRUE	TRUE	FALSE
cg18552620	chr7	43623519	43623520	STK17A	9263	826	CGI	FALSE	TRUE	FALSE
cg18631920	chr7	107204302	107204303	DUS4L	11062	-128	CGI	TRUE	FALSE	FALSE
cg18809830	chr7	99032528	99032529	PTCD1	26024	3932	CGI-N-Shore	FALSE	TRUE	FALSE
cg19072251	chr7	148787821	148787822	ZNF786	136051	46	CGI	TRUE	FALSE	FALSE
cg19098793	chr7	1609793	1609794	PSMG3-AS1	114796	83	CGI	TRUE	FALSE	FALSE
cg19160975	chr7	72936186	72936187	BAZ1B	9031	427	CGI	TRUE	FALSE	FALSE
cg19318147	chr7	156880533	156880534	UBE3C	9690	-51120	CGI	FALSE	FALSE	TRUE
cg19410378	chr7	152551811	152551812	ACTR3B	57180	94959	CGI	FALSE	TRUE	FALSE
cg19438100	chr7	8008421	8008422	GLCCI1	113263	0	CGI	TRUE	FALSE	FALSE
cg19455421	chr7	30174596	30174597	C7orf41	222166	43	CGI	TRUE	FALSE	FALSE
cg19570435	chr7	50518048	50518049	FIGNL1	63979	38	CGI	TRUE	FALSE	FALSE
cg19666810	chr7	97822857	97822858	BHLHA15	168620	-18709	CGI	FALSE	TRUE	FALSE
cg19747852	chr7	23571693	23571694	TRA2A	29896	-36	CGI	TRUE	FALSE	FALSE
cg19871631	chr7	90225761	90225762	CDK14	5218	130022	CGI	TRUE	TRUE	FALSE
cg20325479	chr7	100271106	100271107	GNB2	2783	-255	CGI	TRUE	FALSE	FALSE
cg20329848	chr7	1234959	1234960	ZFAND2A	90637	-35103	CGI-S-Shore	FALSE	FALSE	TRUE
cg20500248	chr7	14031164	14031165	ETV1	2115	-113	CGI	TRUE	FALSE	FALSE
cg20561716	chr7	44365327	44365328	CAMK2B	816	-96	CGI	TRUE	FALSE	FALSE
cg20609096	chr7	140714661	140714662	MRPS33	51650	118	CGI	TRUE	TRUE	FALSE
cg20898078	chr7	150773226	150773227	FASTK	10922	4723	CGI-N-Shore	TRUE	TRUE	FALSE
cg21214521	chr7	569979	569980	FLJ44511	441307	9950	CGI	FALSE	FALSE	TRUE
cg21240861	chr7	157129652	157129653	DNAJB6	10049	-56	CGI	TRUE	FALSE	FALSE
cg21497990	chr7	155255122	155255123	EN2	2020	4297	CGI	FALSE	TRUE	FALSE
cg21661680	chr7	1532474	1532475	INTS1	26173	11542	CGI	FALSE	TRUE	FALSE
cg21718653	chr7	106810195	106810196	HBP1	26959	788	CGI	TRUE	TRUE	FALSE
cg22154562	chr7	100136517	100136518	AGFG2	3268	-315	CGI	TRUE	FALSE	FALSE
cg22276763	chr7	97800895	97800896	BHLHA15	168620	-40671	CGI	FALSE	TRUE	FALSE
cg22366933	chr7	101517853	101517854	CUX1	1523	58668	CGI	FALSE	TRUE	FALSE
cg22417420	chr7	75988319	75988320	YWHAG	7532	21	CGI	TRUE	FALSE	FALSE
cg22562051	chr7	931812	931813	GET4	51608	40224	CGI	FALSE	TRUE	FALSE
cg22745781	chr7	16461244	16461245	ISPD	729920	-296	CGI	TRUE	FALSE	FALSE
cg22751848	chr7	158858057	158858058	LINC00689	154822	57011	CGI-S-Shore	FALSE	TRUE	FALSE
cg22785556	chr7	1081061	1081062	GPR146	115330	-16078	CGI	FALSE	TRUE	FALSE
cg22808692	chr7	6193786	6193787	USP42	84132	49235	CGI	FALSE	TRUE	FALSE
cg22920873	chr7	139025153	139025154	LUC7L2	51631	47	CGI	TRUE	FALSE	FALSE
cg23084922	chr7	66386489	66386490	TMEM248	55069	285	CGI	FALSE	TRUE	FALSE
cg23129573	chr7	73442487	73442488	ELN	2006	59	CGI	TRUE	FALSE	FALSE
cg23194596	chr7	36193344	36193345	EEPD1	80820	507	CGI	FALSE	TRUE	FALSE
cg23250587	chr7	150929681	150929682	CHPF2	54480	105	CGI	TRUE	FALSE	FALSE
cg23305129	chr7	154706386	154706387	LOC100132707	100132707	-13839	CGI	FALSE	FALSE	TRUE
cg23678070	chr7	75831205	75831206	SRRM3	222183	-9	CGI	TRUE	FALSE	FALSE
cg23931027	chr7	2142553	2142554	MAD1L1	8379	130028	CGI	FALSE	TRUE	FALSE
cg24084481	chr7	127669504	127669505	LRRC4	64101	1496	CGI	TRUE	TRUE	FALSE
cg24140629	chr7	105752950	105752951	SYPL1	6856	105	CGI	TRUE	FALSE	FALSE
cg24232083	chr7	82307046	82307047	CACNA2D1	781	-234014	Non-CGI	FALSE	FALSE	TRUE
cg24286812	chr7	1026949	1026950	CYP2W1	54905	4113	CGI	FALSE	TRUE	FALSE
cg24310924	chr7	98592094	98592095	MIR3609	100500819	112820	CGI	FALSE	TRUE	FALSE
cg24399467	chr7	6474426	6474427	KDELR2	11014	49421	CGI-N-Shore	TRUE	TRUE	FALSE
cg24559666	chr7	158669887	158669888	WDR60	55112	20617	CGI	FALSE	TRUE	FALSE
cg24794322	chr7	157462548	157462549	MIR153-2	406945	-95433	CGI	FALSE	TRUE	FALSE
cg24883574	chr7	127225343	127225344	GCC1	79571	309	CGI	TRUE	FALSE	FALSE
cg25020666	chr7	75957850	75957851	HSPB1	3315	25974	CGI	FALSE	TRUE	FALSE
cg25052320	chr7	44365303	44365304	CAMK2B	816	-72	CGI	TRUE	FALSE	FALSE
cg25109431	chr7	130419057	130419058	KLF14	136259	-168	CGI	TRUE	FALSE	FALSE
cg25183958	chr7	107384214	107384215	CBLL1	79872	-63	CGI	TRUE	FALSE	FALSE
cg25297425	chr7	6144127	6144128	USP42	84132	-421	CGI	TRUE	FALSE	FALSE
cg25414463	chr7	152564066	152564067	ACTR3B	57180	107214	CGI	FALSE	FALSE	TRUE
cg25591844	chr7	111846886	111846887	ZNF277	11179	242	CGI	TRUE	TRUE	FALSE
cg25618672	chr7	65939712	65939713	LINC00174	285908	-74316	CGI	FALSE	FALSE	TRUE
cg25655978	chr7	73819587	73819588	GTF2IRD1	9569	-48531	CGI-S-Shore	FALSE	TRUE	FALSE
cg25876509	chr7	97501730	97501731	ASNS	440	122	CGI	TRUE	FALSE	FALSE
cg25950036	chr7	158342934	158342935	MIR595	693180	-17428	CGI	FALSE	TRUE	FALSE
cg25981124	chr7	150924273	150924274	ABCF2	10061	42	CGI	TRUE	FALSE	FALSE
cg26385438	chr7	107384100	107384101	CBLL1	79872	-177	CGI	TRUE	FALSE	FALSE
cg26521404	chr7	27204981	27204982	HOXA9	3205	166	CGI	TRUE	TRUE	FALSE
cg26892394	chr7	87563573	87563574	ADAM22	53616	6	CGI	TRUE	FALSE	FALSE
cg26967842	chr7	157369158	157369159	MIR153-2	406945	-2043	CGI-S-Shore	FALSE	TRUE	FALSE
cg27056436	chr7	5569463	5569464	ACTB	60	767	CGI	TRUE	TRUE	FALSE
cg27071405	chr7	158949843	158949844	VIPR2	7434	-12193	CGI	FALSE	FALSE	TRUE
cg27115996	chr7	102741563	102741564	ARMC10	83787	26234	Non-CGI	FALSE	TRUE	FALSE
cg27398283	chr7	785029	785030	PRKAR1B	5575	-17715	CGI	FALSE	TRUE	FALSE
cg27633530	chr7	50344294	50344295	IKZF1	10320	-82	CGI-S-Shore	TRUE	FALSE	FALSE
cg00420450	chr8	22132641	22132642	PIWIL2	55124	-167	CGI	TRUE	FALSE	FALSE
cg00741600	chr8	42753110	42753111	HOOK3	84376	1076	CGI	TRUE	TRUE	FALSE
cg00845598	chr8	142452378	142452379	PTP4A3	11156	20370	CGI	FALSE	TRUE	FALSE
cg00892353	chr8	124247948	124247949	C8orf76	84933	5688	CGI	FALSE	TRUE	FALSE
cg00945486	chr8	139890004	139890005	COL22A1	169044	36230	CGI	FALSE	TRUE	FALSE
cg01226963	chr8	1051814	1051815	LOC286083	286083	199011	CGI	FALSE	TRUE	FALSE
cg01459673	chr8	95907442	95907443	CCNE2	9134	38	CGI	TRUE	FALSE	FALSE
cg01972576	chr8	143916273	143916274	GML	2765	55	CGI	TRUE	FALSE	FALSE
cg02150714	chr8	1876715	1876716	KBTBD11	9920	-45327	CGI	FALSE	TRUE	FALSE
cg02169279	chr8	22733261	22733262	PEBP4	157310	52158	Non-CGI	FALSE	TRUE	FALSE
cg02228226	chr8	143857045	143857046	LYNX1	66004	2593	CGI-N-Shore	FALSE	TRUE	FALSE
cg02509647	chr8	94712810	94712811	FAM92A1	137392	36	CGI	TRUE	FALSE	FALSE
cg02516583	chr8	38243869	38243870	LETM2	137994	-88	CGI	TRUE	FALSE	FALSE
cg02523415	chr8	82633572	82633573	ZFAND1	79752	-32	CGI	TRUE	FALSE	FALSE
cg03356157	chr8	17013756	17013757	ZDHHC2	51201	-78	CGI	TRUE	FALSE	FALSE
cg03460049	chr8	142138643	142138644	DENND3	22898	-75	CGI	TRUE	FALSE	FALSE
cg03511735	chr8	142405227	142405228	PTP4A3	11156	-26778	CGI	FALSE	TRUE	FALSE
cg03515557	chr8	114450115	114450116	CSMD3	114788	-872	CGI	TRUE	FALSE	FALSE
cg04041976	chr8	67085823	67085824	CRH	1392	5021	CGI-N-Shelf	FALSE	TRUE	FALSE
cg04413895	chr8	105601615	105601616	LRP12	29967	-362	CGI	TRUE	FALSE	FALSE
cg05427356	chr8	146017372	146017373	RPL8	6132	431	CGI	TRUE	TRUE	FALSE
cg05446539	chr8	976072	976073	LOC286083	286083	274753	CGI	FALSE	TRUE	FALSE
cg05949331	chr8	143666563	143666564	ARC	23237	29268	CGI	FALSE	FALSE	TRUE
cg06288821	chr8	56791882	56791883	LYN	4067	-502	CGI	TRUE	FALSE	FALSE
cg06692871	chr8	101964133	101964134	YWHAZ	7534	1488	CGI	TRUE	TRUE	FALSE
cg06785302	chr8	119124051	119124052	EXT1	2131	5	CGI-S-Shore	TRUE	FALSE	FALSE
cg07556218	chr8	144623533	144623534	ZC3H3	23144	85	CGI	FALSE	TRUE	FALSE
cg07595301	chr8	22853351	22853352	RHOBTB2	23221	8420	CGI-N-Shelf	TRUE	TRUE	FALSE
cg07998290	chr8	9912305	9912306	MSRA	4482	474	CGI	FALSE	TRUE	FALSE
cg08223003	chr8	134285320	134285321	NDRG1	10397	24225	Non-CGI	FALSE	TRUE	FALSE
cg08309809	chr8	22960572	22960573	TNFRSF10C	8794	244	CGI	TRUE	TRUE	FALSE
cg08508368	chr8	86157364	86157365	CA13	377677	24518	CGI-N-Shore	TRUE	TRUE	FALSE
cg08588859	chr8	128903227	128903228	MIR1205	100302161	-69650	Non-CGI	TRUE	TRUE	FALSE
cg08798921	chr8	104311352	104311353	FZD6	8323	690	CGI	TRUE	TRUE	FALSE
cg08823244	chr8	686919	686920	ERICH1	157697	-5692	CGI	TRUE	FALSE	FALSE
cg09730672	chr8	86157838	86157839	CA13	377677	24992	CGI	TRUE	TRUE	FALSE
cg10317283	chr8	1105655	1105656	LOC286083	286083	145170	CGI	FALSE	FALSE	TRUE
cg10454879	chr8	602158	602159	ERICH1	157697	79066	CGI	FALSE	FALSE	TRUE
cg10498682	chr8	143406917	143406918	TSNARE1	203062	77624	CGI-N-Shore	FALSE	TRUE	FALSE
cg10846728	chr8	38758889	38758890	PLEKHA2	59339	135	CGI	TRUE	FALSE	FALSE
cg11474778	chr8	95487352	95487353	RAD54B	25788	-8	CGI	TRUE	FALSE	FALSE
cg11485247	chr8	22224568	22224569	SLC39A14	23516	-192	CGI	TRUE	FALSE	FALSE
cg11490865	chr8	143425585	143425586	TSNARE1	203062	58956	CGI	FALSE	TRUE	FALSE
cg11535564	chr8	1990438	1990439	MYOM2	9172	-2718	CGI	FALSE	FALSE	TRUE
cg11644755	chr8	1307423	1307424	LOC286083	286083	-56595	CGI	FALSE	FALSE	TRUE
cg11847597	chr8	22673141	22673142	PEBP4	157310	112278	Non-CGI	FALSE	TRUE	FALSE
cg11878619	chr8	75262672	75262673	GDAP1	54332	53	CGI	TRUE	FALSE	FALSE
cg11961683	chr8	121824433	121824434	SNTB1	6641	-123	CGI	TRUE	FALSE	FALSE
cg12640180	chr8	144208685	144208686	LY6H	4062	33366	CGI-N-Shore	FALSE	FALSE	TRUE
cg12686110	chr8	144635478	144635479	GSDMD	79792	-77	CGI	TRUE	FALSE	FALSE
cg12850379	chr8	54935605	54935606	TCEA1	6917	-596	CGI-S-Shore	TRUE	FALSE	FALSE
cg12877251	chr8	9760880	9760881	LINC00599	157627	-40	CGI	TRUE	FALSE	FALSE
cg12934371	chr8	1579180	1579181	DLGAP2	9228	129610	CGI	FALSE	TRUE	FALSE
cg13193676	chr8	80942319	80942320	MRPS28	28957	185	CGI	TRUE	TRUE	FALSE
cg13426096	chr8	37887990	37887991	EIF4EBP1	1978	-28	CGI	TRUE	FALSE	FALSE
cg13682019	chr8	98881265	98881266	MATN2	4147	-44	CGI	TRUE	FALSE	FALSE
cg13682477	chr8	63998667	63998668	TTPA	7274	-54	CGI	TRUE	FALSE	FALSE
cg14215310	chr8	1414188	1414189	DLGAP2	9228	-35379	CGI	FALSE	FALSE	TRUE
cg14350958	chr8	2752736	2752737	MYOM2	9172	759577	Non-CGI	FALSE	FALSE	TRUE
cg14487356	chr8	11565277	11565278	GATA4	2626	30808	CGI	TRUE	TRUE	FALSE
cg14488905	chr8	32406789	32406790	NRG1	3084	909877	CGI	FALSE	TRUE	FALSE
cg14531436	chr8	140928796	140928797	KCNK9	51305	-213496	CGI-S-Shore	FALSE	TRUE	FALSE
cg14551938	chr8	49173274	49173275	UBE2V2	7336	252278	CGI	FALSE	FALSE	TRUE
cg14563129	chr8	141290188	141290189	TRAPPC9	83696	178488	Non-CGI	FALSE	TRUE	FALSE
cg14623024	chr8	143206951	143206952	MIR4472-1	100616268	-50747	CGI	FALSE	FALSE	TRUE
cg14821842	chr8	118532860	118532861	MED30	90390	-103	CGI	TRUE	FALSE	FALSE
cg16190018	chr8	30585628	30585629	GSR	2936	-141	CGI	TRUE	FALSE	FALSE
cg16192717	chr8	101170527	101170528	SPAG1	6674	263	CGI	TRUE	TRUE	FALSE
cg16843695	chr8	9911685	9911686	MSRA	4482	-143	CGI	TRUE	FALSE	FALSE
cg17143192	chr8	8559678	8559679	CLDN23	137075	11	CGI	TRUE	FALSE	FALSE
cg17170088	chr8	145159375	145159376	MAF1	84232	69	CGI	TRUE	FALSE	FALSE
cg17190864	chr8	22926862	22926863	TNFRSF10B	8795	-161	CGI	TRUE	TRUE	FALSE
cg18108022	chr8	103666233	103666234	KLF10	7071	1748	CGI	TRUE	TRUE	FALSE
cg18309761	chr8	121824678	121824679	SNTB1	6641	-368	CGI	TRUE	FALSE	FALSE
cg18540249	chr8	1500367	1500368	DLGAP2	9228	50797	CGI-N-Shore	FALSE	TRUE	FALSE
cg18543993	chr8	88886320	88886321	DCAF4L2	138009	-23	CGI	TRUE	FALSE	FALSE
cg18581191	chr8	145770785	145770786	C8orf82	414919	-16326	CGI	FALSE	TRUE	FALSE
cg18995788	chr8	62673444	62673445	MIR4470	100616484	46096	Non-CGI	FALSE	TRUE	FALSE
cg19077071	chr8	38244615	38244616	LETM2	137994	655	CGI	TRUE	TRUE	FALSE
cg19109740	chr8	1792775	1792776	ARHGEF10	9639	20625	CGI	FALSE	TRUE	FALSE
cg19589903	chr8	146024659	146024660	ZNF517	340385	397	CGI	FALSE	TRUE	FALSE
cg19883384	chr8	25905478	25905479	EBF2	64641	-2837	CGI	FALSE	TRUE	FALSE
cg19883388	chr8	103909930	103909931	AZIN1	51582	-33532	Non-CGI	FALSE	FALSE	TRUE
cg20003034	chr8	1245143	1245144	LOC286083	286083	5682	CGI	FALSE	TRUE	FALSE
cg20083107	chr8	12523148	12523149	MIR3926-2	100500838	-61596	CGI	TRUE	FALSE	FALSE
cg20132801	chr8	48172283	48172284	KIAA0146	23514	-1204	CGI-N-Shore	TRUE	FALSE	FALSE
cg20263435	chr8	41435469	41435470	AGPAT6	137964	-236	CGI	TRUE	FALSE	FALSE
cg20480522	chr8	97274997	97274998	PTDSS1	9791	829	CGI-S-Shore	TRUE	TRUE	FALSE
cg20587332	chr8	40736768	40736769	ZMAT4	79698	18573	Non-CGI	FALSE	TRUE	FALSE
cg21210370	chr8	143609637	143609638	BAI1	575	64259	CGI	FALSE	TRUE	FALSE
cg21243608	chr8	74205946	74205947	RPL7	6129	-76	CGI	TRUE	FALSE	FALSE
cg21701395	chr8	95961492	95961493	TP53INP1	94241	121	CGI	TRUE	FALSE	FALSE
cg21712812	chr8	125385259	125385260	TMEM65	157378	-318	CGI	TRUE	FALSE	FALSE
cg21819129	chr8	1617756	1617757	CLN8	2055	-94112	CGI	FALSE	TRUE	FALSE
cg21934273	chr8	143620593	143620594	BAI1	575	75215	CGI-N-Shelf	FALSE	TRUE	FALSE
cg22020155	chr8	66557012	66557013	MTFR1	9650	123	CGI	TRUE	FALSE	FALSE
cg22028544	chr8	86132837	86132838	CA13	377677	-6	CGI	TRUE	FALSE	FALSE
cg22105512	chr8	49292950	49292951	EFCAB1	79645	354918	CGI	FALSE	FALSE	TRUE
cg22505891	chr8	22014441	22014442	LGI3	203190	-96	CGI	TRUE	FALSE	FALSE
cg22513962	chr8	67976521	67976522	CSPP1	79848	-80	CGI	TRUE	FALSE	FALSE
cg22922403	chr8	145650096	145650097	VPS28	51160	3829	CGI-S-Shore	FALSE	TRUE	FALSE
cg23900548	chr8	141312701	141312702	TRAPPC9	83696	155975	Non-CGI	FALSE	TRUE	FALSE
cg23934955	chr8	145024939	145024940	MIR661	724031	-5491	CGI	TRUE	TRUE	FALSE
cg24139520	chr8	28573832	28573833	EXTL3	2137	14678	CGI	FALSE	TRUE	FALSE
cg24294819	chr8	117887282	117887283	RAD21	5885	-176	CGI	TRUE	TRUE	FALSE
cg24511738	chr8	9762716	9762717	MIR124-1	406907	-1733	CGI	TRUE	FALSE	FALSE
cg24631970	chr8	11059029	11059030	XKR6	286046	-153	CGI	TRUE	FALSE	FALSE
cg24860560	chr8	143057294	143057295	MIR4472-1	100616268	-200404	CGI-S-Shore	FALSE	FALSE	TRUE
cg24888944	chr8	67525724	67525725	MYBL1	4603	-243	CGI	TRUE	FALSE	FALSE
cg24889466	chr8	1812138	1812139	ARHGEF10	9639	39988	CGI	FALSE	TRUE	FALSE
cg25358938	chr8	29940886	29940887	TMEM66	51669	-236	CGI-S-Shore	TRUE	TRUE	FALSE
cg25493764	chr8	1112803	1112804	LOC286083	286083	138022	CGI-S-Shore	FALSE	FALSE	TRUE
cg25600446	chr8	145728543	145728544	GPT	2875	-920	CGI-S-Shore	TRUE	FALSE	FALSE
cg25969087	chr8	101733612	101733613	PABPC1	26986	701	CGI	FALSE	TRUE	FALSE
cg25987774	chr8	92082269	92082270	OTUD6B	51633	-153	CGI-N-Shore	TRUE	FALSE	FALSE
cg26353328	chr8	42010408	42010409	AP3M2	10947	-54	CGI	TRUE	FALSE	FALSE
cg26626729	chr8	61566439	61566440	CHD7	55636	-24883	CGI	FALSE	FALSE	TRUE
cg27465717	chr8	67940776	67940777	PPP1R42	286187	8	CGI	TRUE	FALSE	FALSE
cg02827328	chr9	100881403	100881404	TRIM14	9830	83	CGI	TRUE	FALSE	FALSE
cg13410446	chr9	84304944	84304945	TLE1	7088	-1347	CGI	TRUE	TRUE	FALSE
cg13433446	chr9	128170534	128170535	GAPVD1	26130	146422	CGI	FALSE	FALSE	TRUE
cg13447502	chr9	469777	469778	KANK1	23189	-515	CGI	TRUE	FALSE	FALSE
cg13483474	chr9	139001555	139001556	C9orf69	90120	9174	CGI	FALSE	FALSE	TRUE
cg13518604	chr9	14313526	14313527	NFIB	4781	85454	CGI	TRUE	TRUE	FALSE
cg13686537	chr9	136573518	136573519	SARDH	1757	31557	CGI	FALSE	TRUE	FALSE
cg13691240	chr9	86594416	86594417	HNRNPK	3190	1151	CGI	TRUE	TRUE	FALSE
cg13705014	chr9	139250888	139250889	DNLZ	728489	7351	CGI	FALSE	TRUE	FALSE
cg13708974	chr9	131466143	131466144	PKN3	29941	1340	CGI	FALSE	TRUE	FALSE
cg13718827	chr9	131008520	131008521	MIR3154	100422893	-1210	CGI-N-Shelf	TRUE	TRUE	FALSE
cg13719746	chr9	100747559	100747560	ANP32B	10541	2069	CGI-S-Shore	FALSE	TRUE	FALSE
cg13739116	chr9	139622701	139622702	SNHG7	84973	-64	CGI	TRUE	FALSE	FALSE
cg13849454	chr9	14348844	14348845	NFIB	4781	50136	CGI	FALSE	TRUE	FALSE
cg13860981	chr9	19104008	19104009	HAUS6	54801	-1105	CGI-S-Shore	TRUE	FALSE	FALSE
cg13871695	chr9	126101872	126101873	CRB2	286204	-16574	CGI	FALSE	FALSE	TRUE
cg13944939	chr9	130679246	130679247	ST6GALNAC4	27090	57	CGI	TRUE	FALSE	FALSE
cg13982446	chr9	140512815	140512816	C9orf37	85026	491	CGI	TRUE	TRUE	FALSE
cg14099812	chr9	137807097	137807098	FCN1	2219	2707	Non-CGI	FALSE	TRUE	FALSE
cg14155825	chr9	135905981	135905982	GTF3C5	9328	-79	CGI	TRUE	FALSE	FALSE
cg14184780	chr9	95475751	95475752	IPPK	64768	-43203	CGI-N-Shore	FALSE	TRUE	FALSE
cg14224196	chr9	134183545	134183546	PPAPDC3	84814	18463	CGI	FALSE	TRUE	FALSE
cg14229247	chr9	100745139	100745140	ANP32B	10541	-348	CGI	TRUE	FALSE	FALSE
cg14233878	chr9	139546555	139546556	EGFL7	51162	-6751	CGI-N-Shore	FALSE	TRUE	FALSE
cg14360448	chr9	139512327	139512328	EGFL7	51162	-40979	CGI-N-Shelf	FALSE	FALSE	TRUE
cg14363146	chr9	6704178	6704179	KDM4C	23081	-12315	CGI	FALSE	FALSE	TRUE
cg14376679	chr9	123631254	123631255	PHF19	26147	8350	CGI	TRUE	TRUE	FALSE
cg14436106	chr9	116817641	116817642	AMBP	259	23109	CGI	FALSE	TRUE	FALSE
cg14463995	chr9	139048330	139048331	C9orf69	90120	-37598	CGI-S-Shore	FALSE	FALSE	TRUE
cg14524337	chr9	100459217	100459218	XPA	7507	472	CGI	FALSE	TRUE	FALSE
cg14541616	chr9	124855628	124855629	TTLL11	158135	255	CGI	TRUE	FALSE	FALSE
cg14563165	chr9	130214037	130214038	LRSAM1	90678	271	CGI	TRUE	TRUE	FALSE
cg14594187	chr9	124498961	124498962	DAB2IP	153090	169561	CGI	FALSE	TRUE	FALSE
cg14620208	chr9	140652685	140652686	FLJ40292	643210	-4787	CGI-N-Shore	FALSE	TRUE	FALSE
cg00353773	chr10	44880708	44880709	CXCL12	6387	-162	CGI	TRUE	FALSE	FALSE
cg00363811	chr10	103113695	103113696	BTRC	8945	-128	CGI	TRUE	FALSE	FALSE
cg00630724	chr10	103991299	103991300	ELOVL3	83401	5155	CGI	FALSE	TRUE	FALSE
cg00821051	chr10	131592591	131592592	MIR4297	100422873	49045	CGI	FALSE	FALSE	TRUE
cg00828616	chr10	81838587	81838588	TMEM254	80195	160	CGI	TRUE	TRUE	FALSE
cg00844376	chr10	99473557	99473558	MARVELD1	83742	91	CGI	TRUE	FALSE	FALSE
cg00972313	chr10	1531243	1531244	ADARB2-AS1	642394	-37580	CGI	FALSE	TRUE	FALSE
cg01109508	chr10	135187068	135187069	ECHS1	1892	-159	CGI	TRUE	FALSE	FALSE
cg01431972	chr10	77163401	77163402	ZNF503	84858	-1887	CGI	TRUE	TRUE	FALSE
cg02092590	chr10	3827595	3827596	KLF6	1316	-121	CGI	TRUE	FALSE	FALSE
cg02257750	chr10	118501507	118501508	C10orf82	143379	-71731	CGI	FALSE	TRUE	FALSE
cg02671751	chr10	88281576	88281577	WAPAL	23063	-34	CGI	TRUE	FALSE	FALSE
cg02893204	chr10	576012	576013	PRR26	414235	-119874	CGI	FALSE	TRUE	FALSE
cg02951695	chr10	134400351	134400352	INPP5A	3632	48997	CGI	FALSE	TRUE	FALSE
cg03790325	chr10	46089985	46089986	MARCH8	220972	367	CGI	TRUE	FALSE	FALSE
cg03814556	chr10	96219239	96219240	TBC1D12	23232	57052	CGI-N-Shore	FALSE	TRUE	FALSE
cg04451988	chr10	15412706	15412707	FAM171A1	221061	350	CGI	FALSE	TRUE	FALSE
cg04468795	chr10	70706266	70706267	DDX21	9188	-9624	Non-CGI	FALSE	TRUE	FALSE
cg04781820	chr10	124914221	124914222	BUB3	9184	460	CGI	FALSE	TRUE	FALSE
cg04787271	chr10	132886921	132886922	MIR378C	100422867	-125989	CGI	FALSE	FALSE	TRUE
cg04855447	chr10	46168377	46168378	ZFAND4	93550	-125	CGI	TRUE	FALSE	FALSE
cg05018361	chr10	18940650	18940651	NSUN6	221078	-99	CGI	TRUE	FALSE	FALSE
cg05228244	chr10	1102351	1102352	WDR37	22884	6	CGI	TRUE	FALSE	FALSE
cg05244136	chr10	75541665	75541666	CHCHD1	118487	-141	CGI	TRUE	FALSE	FALSE
cg05265884	chr10	26681244	26681245	APBB1IP	54518	-46020	CGI	FALSE	FALSE	TRUE
cg05420251	chr10	102133820	102133821	LINC00263	90271	486	CGI	FALSE	TRUE	FALSE
cg05954989	chr10	135191962	135191963	PAOX	196743	-777	CGI	TRUE	FALSE	FALSE
cg06124827	chr10	99393498	99393499	MORN4	118812	413	CGI	TRUE	TRUE	FALSE
cg06152496	chr10	95462325	95462326	FRA10AC1	118924	586	CGI	TRUE	TRUE	FALSE
cg06427772	chr10	134230646	134230647	PWWP2B	170394	19943	CGI	FALSE	TRUE	FALSE
cg06690686	chr10	23003779	23003780	PIP4K2A	5305	-275	CGI	TRUE	FALSE	FALSE
cg06749514	chr10	114206969	114206970	VTI1A	143187	212	CGI	TRUE	FALSE	FALSE
cg06874323	chr10	102986525	102986526	LBX1	10660	2190	CGI	FALSE	FALSE	TRUE
cg06882901	chr10	25013879	25013880	ARHGAP21	57584	-1281	CGI	TRUE	FALSE	FALSE
cg07199534	chr10	120863349	120863350	FAM45B	55855	-260	CGI-N-Shore	TRUE	FALSE	FALSE
cg07229938	chr10	124907600	124907601	HMX2	3167	-36	CGI	TRUE	FALSE	FALSE
cg07503918	chr10	54068594	54068595	PRKG1-AS1	100506939	5292	CGI	FALSE	TRUE	FALSE
cg07857251	chr10	60272754	60272755	BICC1	80114	-148	CGI	TRUE	FALSE	FALSE
cg07981845	chr10	104154074	104154075	NFKB2	4791	-153	CGI	TRUE	FALSE	FALSE
cg08194313	chr10	118032892	118032893	GFRA1	2674	232	CGI	TRUE	FALSE	FALSE
cg08199893	chr10	91461201	91461202	KIF20B	9585	-164	CGI	TRUE	FALSE	FALSE
cg08379212	chr10	97803058	97803059	CCNJ	54619	-99	CGI	TRUE	TRUE	FALSE
cg08422497	chr10	133938893	133938894	JAKMIP3	282973	20579	CGI-S-Shore	FALSE	TRUE	FALSE
cg08486583	chr10	94333347	94333348	IDE	3416	503	CGI	FALSE	TRUE	FALSE
cg08536417	chr10	23728250	23728251	OTUD1	220213	51	CGI	TRUE	FALSE	FALSE
cg08970761	chr10	7829997	7829998	KIN	22944	-6	CGI	TRUE	FALSE	FALSE
cg09576143	chr10	124220367	124220368	HTRA1	5654	-672	CGI-N-Shore	TRUE	FALSE	FALSE
cg09634707	chr10	72219713	72219714	NODAL	4838	-18247	CGI-S-Shore	FALSE	FALSE	TRUE
cg09689404	chr10	3724497	3724498	KLF6	1316	102974	CGI-N-Shore	FALSE	TRUE	FALSE
cg09759523	chr10	7621857	7621858	ITIH5	80760	87102	CGI	FALSE	TRUE	FALSE
cg09798879	chr10	101190764	101190765	GOT1	2805	-233	CGI	TRUE	FALSE	FALSE
cg10030921	chr10	99393523	99393524	MORN4	118812	388	CGI	TRUE	TRUE	FALSE
cg10614768	chr10	135018765	135018766	UTF1	8433	-25011	CGI	FALSE	TRUE	FALSE
cg10799668	chr10	131631816	131631817	MIR4297	100422873	9820	CGI	FALSE	FALSE	TRUE
cg11217004	chr10	101492579	101492580	COX15	1355	-155	CGI-S-Shore	TRUE	TRUE	FALSE
cg11342130	chr10	73610745	73610746	PSAP	5660	335	CGI	FALSE	TRUE	FALSE
cg11769939	chr10	48370695	48370696	ZNF488	118738	15605	Non-CGI	TRUE	TRUE	FALSE
cg11808746	chr10	95256359	95256360	CEP55	55165	-8	CGI	TRUE	FALSE	FALSE
cg12235073	chr10	6270423	6270424	LOC399715	399715	-49225	CGI-S-Shore	FALSE	TRUE	FALSE
cg12461364	chr10	12084985	12084986	UPF2	26019	182	CGI	TRUE	FALSE	FALSE
cg12503575	chr10	50970438	50970439	OGDHL	55753	-12	CGI	TRUE	FALSE	FALSE
cg12803321	chr10	43839193	43839194	FXYD4	53828	-27897	CGI-S-Shore	FALSE	FALSE	TRUE
cg13196826	chr10	98945664	98945665	SLIT1	6585	17	CGI	TRUE	TRUE	FALSE
cg13238876	chr10	114605001	114605002	LOC143188	143188	-5670	CGI	FALSE	FALSE	TRUE
cg13324547	chr10	28966033	28966034	BAMBI	25805	-389	CGI	TRUE	FALSE	FALSE
cg13325154	chr10	104001240	104001241	PITX3	5309	-8	CGI	TRUE	FALSE	FALSE
cg13453904	chr10	133484610	133484611	FLJ46300	399827	137923	CGI	FALSE	FALSE	TRUE
cg13574488	chr10	119306246	119306247	EMX2OS	196047	-1666	CGI	TRUE	TRUE	FALSE
cg13734710	chr10	95242014	95242015	MYOF	26509	58	CGI-N-Shore	TRUE	FALSE	FALSE
cg13992728	chr10	134817184	134817185	NA	255352	-61094	CGI-N-Shore	FALSE	FALSE	TRUE
cg14256022	chr10	134216452	134216453	PWWP2B	170394	5749	CGI	FALSE	TRUE	FALSE
cg14548882	chr10	99393502	99393503	MORN4	118812	409	CGI	TRUE	TRUE	FALSE
cg14701597	chr10	130757617	130757618	MGMT	4255	-507835	CGI	FALSE	FALSE	TRUE
cg14731413	chr10	52833444	52833445	PRKG1	5592	82532	CGI-N-Shore	TRUE	TRUE	FALSE
cg14778235	chr10	102589102	102589103	FAM178A	55719	-83222	CGI	FALSE	TRUE	FALSE
cg14929913	chr10	1147979	1147980	IDI1	3422	-45334	CGI	FALSE	TRUE	FALSE
cg14943877	chr10	112257612	112257613	DUSP5	1847	-11	CGI	TRUE	FALSE	FALSE
cg15727783	chr10	105727545	105727546	SLK	9748	74	CGI-S-Shore	TRUE	FALSE	FALSE
cg15825287	chr10	64892910	64892911	NRBF2	29982	-95	CGI-N-Shore	TRUE	FALSE	FALSE
cg15996480	chr10	133484592	133484593	FLJ46300	399827	137941	CGI	FALSE	FALSE	TRUE
cg16230134	chr10	91461363	91461364	KIF20B	9585	-2	CGI	TRUE	FALSE	FALSE
cg16444701	chr10	134790855	134790856	NA	255352	-34765	CGI	FALSE	FALSE	TRUE
cg16497424	chr10	135191798	135191799	PAOX	196743	-941	CGI	TRUE	FALSE	FALSE
cg16655837	chr10	32636197	32636198	EPC1	80314	31468	CGI	TRUE	TRUE	FALSE
cg16661579	chr10	95462206	95462207	FRA10AC1	118924	705	CGI	TRUE	TRUE	FALSE
cg17096262	chr10	29759227	29759228	PTCHD3P1	387647	60743	CGI	FALSE	TRUE	FALSE
cg17405055	chr10	13142126	13142127	OPTN	10133	43	CGI	TRUE	FALSE	FALSE
cg17621642	chr10	14920829	14920830	SUV39H2	79723	46	CGI	TRUE	FALSE	FALSE
cg17634326	chr10	820430	820431	DIP2C	22982	-84821	CGI	FALSE	FALSE	TRUE
cg17720259	chr10	131636374	131636375	MIR4297	100422873	5262	CGI-N-Shore	FALSE	TRUE	FALSE
cg17743250	chr10	94820927	94820928	CYP26C1	340665	-92	CGI	TRUE	FALSE	FALSE
cg17819963	chr10	135191943	135191944	PAOX	196743	-796	CGI	TRUE	FALSE	FALSE
cg17895310	chr10	44144311	44144312	ZNF32	7580	13	CGI	TRUE	TRUE	FALSE
cg18196295	chr10	418757	418758	ZMYND11	10771	238351	CGI-N-Shelf	FALSE	TRUE	FALSE
cg18386163	chr10	102242208	102242209	WNT8B	7479	19395	CGI	FALSE	TRUE	FALSE
cg18732587	chr10	105127670	105127671	TAF5	6877	-52	CGI	TRUE	FALSE	FALSE
cg18802414	chr10	75757814	75757815	VCL	7414	2862	CGI	TRUE	TRUE	FALSE
cg18884060	chr10	126370288	126370289	FAM53B	9679	108617	CGI-N-Shore	FALSE	TRUE	FALSE
cg18892424	chr10	131034796	131034797	MGMT	4255	-230656	CGI	FALSE	FALSE	TRUE
cg19266671	chr10	126712482	126712483	MIR4296	100423041	8955	CGI	FALSE	TRUE	FALSE
cg19736712	chr10	5932028	5932029	ANKRD16	54522	-167	CGI	TRUE	TRUE	FALSE
cg19925204	chr10	119307692	119307693	EMX2OS	196047	-3112	CGI-S-Shore	FALSE	TRUE	FALSE
cg20264529	chr10	30638039	30638040	MTPAP	55149	25336	CGI	FALSE	TRUE	FALSE
cg20627835	chr10	61469748	61469749	SLC16A9	220963	-98	CGI	TRUE	FALSE	FALSE
cg20628663	chr10	43360327	43360328	BMS1	9790	82372	CGI-N-Shore	FALSE	FALSE	TRUE
cg20634940	chr10	465975	465976	PRR26	414235	-229911	CGI	FALSE	TRUE	FALSE
cg20691436	chr10	5567478	5567479	CALML3	810	553	CGI	TRUE	FALSE	FALSE
cg22735222	chr10	101295724	101295725	NKX2-3	159296	3033	CGI	FALSE	TRUE	FALSE
cg22831607	chr10	99531797	99531798	SFRP5	6425	-40	CGI	TRUE	FALSE	FALSE
cg23274680	chr10	94828605	94828606	CYP26A1	1592	-4625	CGI	FALSE	FALSE	TRUE
cg23622322	chr10	133773519	133773520	BNIP3	664	21914	CGI-N-Shore	FALSE	FALSE	TRUE
cg24136740	chr10	415418	415419	ZMYND11	10771	235012	CGI-S-Shore	FALSE	TRUE	FALSE
cg24158157	chr10	124581726	124581727	CUZD1	50624	15883	CGI-S-Shelf	FALSE	FALSE	TRUE
cg24175823	chr10	118547670	118547671	ENO4	387712	-61351	CGI	FALSE	TRUE	FALSE
cg24812143	chr10	72312093	72312094	PRF1	5551	50436	CGI	FALSE	TRUE	FALSE
cg24872610	chr10	3158994	3158995	PITRM1-AS1	100507034	-24797	CGI-N-Shore	TRUE	TRUE	FALSE
cg25010929	chr10	87898742	87898743	MIR346	442911	125801	CGI	FALSE	TRUE	FALSE
cg25257644	chr10	23002598	23002599	PIP4K2A	5305	903	CGI-S-Shore	FALSE	TRUE	FALSE
cg25506797	chr10	133850760	133850761	BNIP3	664	-55324	CGI	FALSE	FALSE	TRUE
cg25793692	chr10	62538781	62538782	CDK1	983	691	CGI	FALSE	TRUE	FALSE
cg25914931	chr10	94352760	94352761	KIF11	3832	-63	CGI	TRUE	FALSE	FALSE
cg26011548	chr10	133835927	133835928	BNIP3	664	-40491	CGI-S-Shore	FALSE	FALSE	TRUE
cg26024341	chr10	35415980	35415981	CREM	1390	210	CGI	TRUE	FALSE	FALSE
cg26134646	chr10	73569677	73569678	C10orf54	64115	-36339	CGI	TRUE	TRUE	FALSE
cg26155979	chr10	105110866	105110867	PCGF6	84108	23	CGI	TRUE	FALSE	FALSE
cg26258226	chr10	134684054	134684055	NA	255352	72033	CGI	FALSE	TRUE	FALSE
cg26288438	chr10	99052618	99052619	ARHGAP19-SLIT1	100533184	-187	CGI-S-Shore	TRUE	FALSE	FALSE
cg26439641	chr10	15139056	15139057	RPP38	10557	-124	CGI	TRUE	TRUE	FALSE
cg26450586	chr10	72972207	72972208	UNC5B	219699	-83	CGI	TRUE	FALSE	FALSE
cg26718707	chr10	518370	518371	PRR26	414235	-177516	CGI	FALSE	TRUE	FALSE
cg26931308	chr10	22292816	22292817	DNAJC1	64215	-165	CGI	TRUE	FALSE	FALSE
cg26951440	chr10	101291272	101291273	NKX2-3	159296	-1416	CGI	TRUE	FALSE	FALSE
cg27048436	chr10	45701157	45701158	MIR3156-1	100422988	41694	Non-CGI	FALSE	FALSE	TRUE
cg27302870	chr10	43904768	43904769	HNRNPF	3185	-71	CGI	TRUE	FALSE	FALSE
cg27307257	chr10	102978358	102978359	LBX1	10660	10357	CGI	FALSE	FALSE	TRUE
cg27346088	chr10	61469843	61469844	SLC16A9	220963	-193	CGI	TRUE	FALSE	FALSE
cg27399957	chr10	100207468	100207469	HPS1	3257	-763	CGI-S-Shore	TRUE	FALSE	FALSE
cg27423920	chr10	2249628	2249629	LINC00701	399708	107638	CGI	FALSE	FALSE	TRUE
cg27505880	chr10	101491799	101491800	CUTC	51076	-157	CGI	TRUE	FALSE	FALSE
cg27636376	chr10	15139816	15139817	C10orf111	221060	-497	CGI	TRUE	TRUE	FALSE
cg00317879	chr11	68920611	68920612	TPCN2	219931	104260	CGI	FALSE	FALSE	TRUE
cg00334798	chr11	72929553	72929554	P2RY2	5029	208	CGI	TRUE	TRUE	FALSE
cg00344445	chr11	128647107	128647108	FLI1-AS1	100507392	-81188	CGI	FALSE	TRUE	FALSE
cg00378999	chr11	3246380	3246381	MRGPRG	386746	-6336	CGI	FALSE	FALSE	TRUE
cg00386581	chr11	62446121	62446122	UBXN1	51035	422	CGI	FALSE	TRUE	FALSE
cg00393798	chr11	8615694	8615695	STK33	65975	79	CGI	TRUE	FALSE	FALSE
cg00522679	chr11	130083160	130083161	ST14	6768	53477	CGI-S-Shelf	FALSE	FALSE	TRUE
cg00580047	chr11	20385630	20385631	HTATIP2	10553	398	CGI	TRUE	TRUE	FALSE
cg01102007	chr11	119077458	119077459	CBL	867	467	CGI	FALSE	TRUE	FALSE
cg01158277	chr11	111783327	111783328	HSPB2-C11orf52	100528019	-131	CGI-N-Shore	TRUE	FALSE	FALSE
cg01176141	chr11	70023032	70023033	FADD	8772	-26235	CGI	FALSE	TRUE	FALSE
cg01512787	chr11	36476319	36476320	TRAF6	7189	55542	Non-CGI	FALSE	TRUE	FALSE
cg01778153	chr11	18035136	18035137	SERGEF	26297	-498	CGI	TRUE	FALSE	FALSE
cg01804278	chr11	63894802	63894803	FLRT1	23769	23439	CGI-S-Shore	FALSE	TRUE	FALSE
cg01891497	chr11	122311384	122311385	MIR100HG	399959	-72916	CGI	FALSE	FALSE	TRUE
cg02097203	chr11	2548282	2548283	KCNQ1	3784	82060	CGI-N-Shore	FALSE	TRUE	FALSE
cg02200456	chr11	2923436	2923437	SLC22A18AS	5003	1737	CGI	TRUE	TRUE	FALSE
cg02423574	chr11	119066560	119066561	CCDC153	283152	148	Non-CGI	TRUE	FALSE	FALSE
cg02474542	chr11	72300891	72300892	MIR139	406931	25281	CGI	FALSE	TRUE	FALSE
cg02484111	chr11	130318594	130318595	ADAMTS15	170689	-273	CGI	TRUE	FALSE	FALSE
cg02504416	chr11	44331629	44331630	ALX4	60529	85	CGI	TRUE	FALSE	FALSE
cg02654360	chr11	14665070	14665071	PSMA1	5682	108	CGI	TRUE	FALSE	FALSE
cg02886208	chr11	14281011	14281012	RRAS2	22800	105039	CGI	FALSE	TRUE	FALSE
cg02955631	chr11	119293601	119293602	THY1	7070	643	CGI	FALSE	TRUE	FALSE
cg02964845	chr11	64885336	64885337	ZNHIT2	741	-165	CGI	TRUE	FALSE	FALSE
cg03029175	chr11	2966049	2966050	PHLDA2	7262	-15398	CGI	FALSE	TRUE	FALSE
cg03067462	chr11	2422131	2422132	TSSC4	10078	412	CGI	TRUE	TRUE	FALSE
cg03124680	chr11	3013791	3013792	NAP1L4	4676	-183	CGI	TRUE	FALSE	FALSE
cg03129853	chr11	93862749	93862750	PANX1	24145	654	CGI	TRUE	TRUE	FALSE
cg03267026	chr11	1470086	1470087	BRSK2	9024	58956	CGI	TRUE	TRUE	FALSE
cg03306615	chr11	2292890	2292891	ASCL2	430	-707	CGI	TRUE	FALSE	FALSE
cg03315058	chr11	62476542	62476543	BSCL2	26580	547	CGI-N-Shore	TRUE	TRUE	FALSE
cg03693064	chr11	94227380	94227381	ANKRD49	54851	226	CGI	TRUE	TRUE	FALSE
cg03970849	chr11	79148183	79148184	TENM4	26011	3510	CGI-N-Shore	FALSE	TRUE	FALSE
cg04029159	chr11	415080	415081	SIGIRR	59307	2315	CGI-N-Shore	TRUE	TRUE	FALSE
cg04203298	chr11	59521722	59521723	STX3	6809	-808	CGI	TRUE	FALSE	FALSE
cg04420309	chr11	66824445	66824446	RHOD	29984	155	CGI	TRUE	FALSE	FALSE
cg04570322	chr11	58345695	58345696	LPXN	9404	-1	CGI	TRUE	FALSE	FALSE
cg04672785	chr11	65792781	65792782	CATSPER1	117144	1205	CGI-N-Shore	TRUE	FALSE	FALSE
cg04683476	chr11	114271356	114271357	RBM7	10179	-26	CGI	TRUE	FALSE	FALSE
cg04729398	chr11	118307152	118307153	MLL	4297	-51	CGI	TRUE	FALSE	FALSE
cg04734688	chr11	17229674	17229675	PIK3C2A	5286	-143	CGI	TRUE	FALSE	FALSE
cg04755604	chr11	13011184	13011185	LOC100506305	100506305	-88	Non-CGI	TRUE	FALSE	FALSE
cg04855748	chr11	64067763	64067764	TEX40	25858	944	CGI	TRUE	TRUE	FALSE
cg05059605	chr11	129245568	129245569	BARX2	8538	-311	CGI	TRUE	FALSE	FALSE
cg05237469	chr11	133446415	133446416	OPCML	4978	-44011	CGI	FALSE	FALSE	TRUE
cg05402634	chr11	70644141	70644142	MIR3664	100500844	74330	CGI	FALSE	TRUE	FALSE
cg05462819	chr11	125933319	125933320	CDON	50937	-131	CGI	TRUE	FALSE	FALSE
cg05474707	chr11	118193591	118193592	CD3E	916	18295	Non-CGI	FALSE	FALSE	TRUE
cg05479196	chr11	64513056	64513057	RASGRP2	10235	-127	CGI	TRUE	FALSE	FALSE
cg05949352	chr11	45202135	45202136	PRDM11	56981	86570	CGI	FALSE	TRUE	FALSE
cg05973813	chr11	107992235	107992236	ACAT1	38	-21	CGI	TRUE	FALSE	FALSE
cg06042565	chr11	68564477	68564478	CPT1A	1374	44920	CGI	FALSE	TRUE	FALSE
cg06169760	chr11	291905	291906	ATHL1	80162	2766	CGI	TRUE	TRUE	FALSE
cg06239285	chr11	62104954	62104955	ASRGL1	80150	179	CGI	TRUE	FALSE	FALSE
cg06242063	chr11	67033801	67033802	ADRBK1	156	-102	CGI	TRUE	FALSE	FALSE
cg06326648	chr11	14912680	14912681	CYP2R1	120227	1069	CGI-N-Shore	FALSE	TRUE	FALSE
cg06331271	chr11	43380295	43380296	TTC17	55761	-138	CGI	TRUE	FALSE	FALSE
cg06415550	chr11	456082	456083	PTDSS2	81490	5801	CGI-S-Shelf	FALSE	TRUE	FALSE
cg06745004	chr11	62521749	62521750	ZBTB3	79842	-92	CGI	TRUE	FALSE	FALSE
cg07120479	chr11	67033799	67033800	ADRBK1	156	-104	CGI	TRUE	FALSE	FALSE
cg07264777	chr11	66495323	66495324	SPTBN2	6712	-6452	CGI	FALSE	FALSE	TRUE
cg07311694	chr11	68437927	68437928	GAL	51083	-14054	CGI	FALSE	FALSE	TRUE
cg07346676	chr11	60681596	60681597	TMEM109	79073	224	CGI	TRUE	FALSE	FALSE
cg07402729	chr11	61062902	61062903	VWCE	220001	-113	CGI	TRUE	FALSE	FALSE
cg07503829	chr11	236309	236310	PSMD13	5719	-497	CGI	TRUE	TRUE	FALSE
cg07534440	chr11	57226014	57226015	RTN4RL2	349667	-2323	CGI	FALSE	FALSE	TRUE
cg07701241	chr11	46367812	46367813	DGKZ	8525	13356	CGI-N-Shore	TRUE	TRUE	FALSE
cg08092930	chr11	70117714	70117715	PPFIA1	8500	907	CGI-S-Shore	FALSE	TRUE	FALSE
cg08098619	chr11	3818841	3818842	PGAP2	27315	-111	CGI	TRUE	FALSE	FALSE
cg08111895	chr11	31531177	31531178	IMMP1L	196294	-7	CGI	TRUE	FALSE	FALSE
cg08437403	chr11	1669832	1669833	FAM99A	387742	-16995	CGI	FALSE	TRUE	FALSE
cg08498597	chr11	67163067	67163068	RAD9A	5883	3643	CGI-S-Shelf	FALSE	TRUE	FALSE
cg08632680	chr11	44088068	44088069	ACCS	84680	592	CGI	TRUE	TRUE	FALSE
cg08683012	chr11	78387252	78387253	NARS2	79731	-101342	CGI	TRUE	TRUE	FALSE
cg08801671	chr11	66405978	66405979	RBM4	5936	-108	CGI	TRUE	TRUE	FALSE
cg09029541	chr11	66468479	66468480	SPTBN2	6712	20389	CGI	FALSE	TRUE	FALSE
cg09090048	chr11	134093731	134093732	NCAPD3	23310	693	CGI	TRUE	TRUE	FALSE
cg09264906	chr11	57424981	57424982	CLP1	10978	-233	CGI	TRUE	FALSE	FALSE
cg09455118	chr11	131243839	131243840	NTM	50863	3467	CGI-S-Shelf	FALSE	TRUE	FALSE
cg09563846	chr11	875758	875759	TSPAN4	7106	32933	CGI	FALSE	TRUE	FALSE
cg09797334	chr11	39183488	39183489	LRRC4C	57689	2297833	CGI	FALSE	FALSE	TRUE
cg10284592	chr11	57434942	57434943	ZDHHC5	25921	-530	CGI	TRUE	FALSE	FALSE
cg10324219	chr11	134201575	134201576	GLB1L2	89944	-191	CGI	TRUE	FALSE	FALSE
cg10424462	chr11	73073652	73073653	RELT	84957	-13751	CGI	FALSE	TRUE	FALSE
cg10449839	chr11	64794983	64794984	SAC3D1	29901	-13391	CGI	TRUE	TRUE	FALSE
cg10658706	chr11	93517407	93517408	MED17	9440	1	CGI	TRUE	FALSE	FALSE
cg10904972	chr11	119227328	119227329	C1QTNF5	114902	-9944	CGI	FALSE	TRUE	FALSE
cg10980495	chr11	1774722	1774723	IFITM10	402778	-2897	CGI	FALSE	TRUE	FALSE
cg11157765	chr11	69982996	69982997	ANO1	55107	58587	Non-CGI	FALSE	TRUE	FALSE
cg11839729	chr11	62359609	62359610	TUT1	64852	-499	CGI	TRUE	FALSE	FALSE
cg11855526	chr11	30607068	30607069	MPPED2	744	860	CGI	TRUE	TRUE	FALSE
cg12139190	chr11	3014171	3014172	NAP1L4	4676	-563	CGI	TRUE	FALSE	FALSE
cg12269002	chr11	77122929	77122930	PAK1	5058	62177	CGI	TRUE	TRUE	FALSE
cg12323850	chr11	94245795	94245796	LOC643037	643037	99	CGI	TRUE	FALSE	FALSE
cg12389545	chr11	72353604	72353605	MIR139	406931	-27429	CGI	TRUE	TRUE	FALSE
cg12486121	chr11	7535256	7535257	PPFIBP2	8495	254	CGI	TRUE	FALSE	FALSE
cg12499235	chr11	2293173	2293174	ASCL2	430	-990	CGI	TRUE	FALSE	FALSE
cg12527384	chr11	123525060	123525061	SCN3B	55800	253	CGI	TRUE	FALSE	FALSE
cg12637942	chr11	65190225	65190226	NEAT1	283131	-42	CGI	TRUE	FALSE	FALSE
cg12658897	chr11	60918586	60918587	VPS37C	55048	10328	Non-CGI	FALSE	TRUE	FALSE
cg12697442	chr11	101981167	101981168	YAP1	10413	-23	CGI	TRUE	FALSE	FALSE
cg12728517	chr11	6947552	6947553	ZNF215	7762	-100	CGI-N-Shore	TRUE	FALSE	FALSE
cg12750446	chr11	129841904	129841905	LINC00167	440072	-30613	CGI	FALSE	TRUE	FALSE
cg13030674	chr11	86511386	86511387	PRSS23	11098	-103	CGI	TRUE	FALSE	FALSE
cg13103303	chr11	71955113	71955114	PHOX2A	401	105	CGI	TRUE	FALSE	FALSE
cg13186010	chr11	100561626	100561627	ARHGAP42	143872	3218	CGI-S-Shelf	FALSE	TRUE	FALSE
cg13245912	chr11	63449340	63449341	RTN3	10313	417	CGI	FALSE	TRUE	FALSE
cg13493559	chr11	64019243	64019244	PLCB3	5331	247	CGI	FALSE	TRUE	FALSE
cg13645902	chr11	118661758	118661759	DDX6	1656	212	CGI	TRUE	TRUE	FALSE
cg13667095	chr11	134132696	134132697	ACAD8	27034	9261	CGI	FALSE	TRUE	FALSE
cg13909178	chr11	128558129	128558130	FLI1	2313	1698	CGI	TRUE	TRUE	FALSE
cg14016074	chr11	809449	809450	RPLP2	6181	-485	CGI	TRUE	FALSE	FALSE
cg14304817	chr11	89867911	89867912	NAALAD2	10003	92	CGI	TRUE	FALSE	FALSE
cg14417711	chr11	6478126	6478127	HPX	3263	-15871	CGI	FALSE	TRUE	FALSE
cg14645526	chr11	91959086	91959087	FAT3	120114	-126174	CGI	FALSE	FALSE	TRUE
cg14650281	chr11	62529007	62529008	POLR2G	5436	-2	CGI	TRUE	FALSE	FALSE
cg14688108	chr11	10315924	10315925	SBF2	81846	-169	CGI	TRUE	FALSE	FALSE
cg14965353	chr11	129765734	129765735	NFRKB	4798	-243	CGI	TRUE	FALSE	FALSE
cg15010079	chr11	45230868	45230869	SYT13	57586	77014	CGI	FALSE	TRUE	FALSE
cg15131371	chr11	123036897	123036898	CLMP	79827	29108	Non-CGI	FALSE	TRUE	FALSE
cg15233711	chr11	13299315	13299316	ARNTL	406	-8	CGI-S-Shore	TRUE	FALSE	FALSE
cg15241519	chr11	121440892	121440893	SORL1	6653	117979	CGI	FALSE	TRUE	FALSE
cg15298666	chr11	130078492	130078493	ST14	6768	48809	CGI	FALSE	TRUE	FALSE
cg15394860	chr11	2017084	2017085	MIR675	100033819	975	CGI	TRUE	TRUE	FALSE
cg15475971	chr11	17796490	17796491	KCNC1	3746	38994	CGI-S-Shelf	FALSE	TRUE	FALSE
cg15507391	chr11	66139221	66139222	SLC29A2	3177	422	CGI	TRUE	TRUE	FALSE
cg15668587	chr11	63581119	63581120	C11orf84	144097	195	CGI	TRUE	FALSE	FALSE
cg15699874	chr11	126152981	126152982	TIRAP	114609	0	CGI	TRUE	FALSE	FALSE
cg15812599	chr11	70849065	70849066	SHANK2	22941	86775	CGI	FALSE	TRUE	FALSE
cg15814736	chr11	63439115	63439116	ATL3	25923	327	CGI	TRUE	FALSE	FALSE
cg15918224	chr11	65101167	65101168	DPF2	5977	-56	CGI	TRUE	FALSE	FALSE
cg15955277	chr11	75428970	75428971	MOGAT2	80168	35	Non-CGI	TRUE	FALSE	FALSE
cg16046740	chr11	95522512	95522513	FAM76B	143684	440	CGI	TRUE	TRUE	FALSE
cg16075139	chr11	2406923	2406924	CD81	975	8375	CGI	FALSE	TRUE	FALSE
cg16095615	chr11	94277451	94277452	FUT4	2526	433	CGI	TRUE	TRUE	FALSE
cg16322655	chr11	31391333	31391334	DCDC1	341019	22	CGI	TRUE	FALSE	FALSE
cg16328999	chr11	1858605	1858606	TNNI2	7136	-1626	CGI	TRUE	TRUE	FALSE
cg16415340	chr11	2160964	2160965	IGF2-AS	51214	-792	CGI	TRUE	TRUE	FALSE
cg16547564	chr11	69408032	69408033	CCND1	595	-47839	CGI	FALSE	FALSE	TRUE
cg16914552	chr11	1714584	1714585	KRTAP5-6	440023	-3839	CGI	FALSE	TRUE	FALSE
cg17105689	chr11	3013942	3013943	NAP1L4	4676	-334	CGI	TRUE	FALSE	FALSE
cg17106175	chr11	62477182	62477183	BSCL2	26580	-90	CGI	TRUE	TRUE	FALSE
cg17206850	chr11	62693456	62693457	CHRM1	1128	-4443	CGI	FALSE	FALSE	TRUE
cg17229496	chr11	60682009	60682010	TMEM109	79073	637	CGI	FALSE	TRUE	FALSE
cg17324887	chr11	18720217	18720218	TMEM86A	144110	-132	CGI	TRUE	FALSE	FALSE
cg17390301	chr11	111250093	111250094	POU2AF1	5450	62	CGI	TRUE	FALSE	FALSE
cg17489964	chr11	10772644	10772645	CTR9	9646	-165	CGI	TRUE	FALSE	FALSE
cg17522727	chr11	794867	794868	SLC25A22	79751	3400	CGI-S-Shelf	FALSE	TRUE	FALSE
cg17676806	chr11	1302836	1302837	TOLLIP	54472	28054	CGI	FALSE	TRUE	FALSE
cg17703048	chr11	133852993	133852994	IGSF9B	22997	-26112	CGI-N-Shore	FALSE	FALSE	TRUE
cg17988546	chr11	60282972	60282973	MS4A13	503497	85	CGI	TRUE	FALSE	FALSE
cg18062684	chr11	63606263	63606264	MARK2	2011	-135	CGI	TRUE	FALSE	FALSE
cg18075073	chr11	210610	210611	RIC8A	60626	2079	CGI-S-Shore	FALSE	TRUE	FALSE
cg18342462	chr11	111385659	111385660	C11orf88	399949	148	CGI	TRUE	FALSE	FALSE
cg18403285	chr11	1317034	1317035	TOLLIP	54472	13856	CGI	FALSE	TRUE	FALSE
cg18412690	chr11	61100593	61100594	DAK	26007	-59	CGI	TRUE	TRUE	FALSE
cg18469778	chr11	18548623	18548624	TSG101	7251	-119	CGI	TRUE	FALSE	FALSE
cg18793109	chr11	576230	576231	PHRF1	57661	-251	CGI	TRUE	FALSE	FALSE
cg18947739	chr11	69590282	69590283	FGF4	2249	-110	CGI	TRUE	FALSE	FALSE
cg19102713	chr11	121028969	121028970	TECTA	7007	55593	CGI-S-Shore	FALSE	TRUE	FALSE
cg19130860	chr11	1959865	1959866	MRPL23	6150	-8635	CGI-S-Shore	FALSE	TRUE	FALSE
cg19284039	chr11	2292895	2292896	ASCL2	430	-712	CGI	TRUE	FALSE	FALSE
cg19341344	chr11	57335140	57335141	UBE2L6	9246	661	CGI	TRUE	TRUE	FALSE
cg19394731	chr11	57283269	57283270	SLC43A1	8501	-76	CGI	TRUE	FALSE	FALSE
cg19586845	chr11	2211939	2211940	MIR4686	100616126	17645	CGI	FALSE	FALSE	TRUE
cg19809735	chr11	43380484	43380485	TTC17	55761	48	CGI	TRUE	FALSE	FALSE
cg20042908	chr11	133852938	133852939	IGSF9B	22997	-26057	CGI-N-Shore	FALSE	FALSE	TRUE
cg20093577	chr11	65819742	65819743	SF3B2	10992	-72	CGI	TRUE	FALSE	FALSE
cg20201954	chr11	68609518	68609519	CPT1A	1374	-118	CGI	TRUE	FALSE	FALSE
cg20221020	chr11	67209257	67209258	CORO1B	57175	2033	CGI	FALSE	TRUE	FALSE
cg20257171	chr11	18548408	18548409	TSG101	7251	93	CGI	TRUE	FALSE	FALSE
cg20512419	chr11	67276145	67276146	CDK2AP2	10263	-42	CGI	TRUE	FALSE	FALSE
cg20524271	chr11	20153750	20153751	DBX1	120237	28118	CGI	FALSE	FALSE	TRUE
cg20541753	chr11	34938014	34938015	APIP	51074	-74	CGI	TRUE	FALSE	FALSE
cg20609344	chr11	101785659	101785660	KIAA1377	57562	-85	CGI	TRUE	TRUE	FALSE
cg20887061	chr11	3818910	3818911	PGAP2	27315	-42	CGI	TRUE	FALSE	FALSE
cg20979732	chr11	64546243	64546244	SF1	7536	71	CGI	TRUE	FALSE	FALSE
cg21023284	chr11	6624872	6624873	RRP8	23378	6	CGI	TRUE	FALSE	FALSE
cg21204356	chr11	3013633	3013634	NAP1L4	4676	-25	CGI	TRUE	FALSE	FALSE
cg21573582	chr11	77300763	77300764	AQP11	282679	326	CGI	TRUE	TRUE	FALSE
cg21692846	chr11	134146075	134146076	GLB1L3	112937	-198	CGI	TRUE	FALSE	FALSE
cg21949229	chr11	9529385	9529386	ZNF143	7702	46872	Non-CGI	FALSE	TRUE	FALSE
cg22387756	chr11	1495050	1495051	BRSK2	9024	83920	CGI-N-Shore	FALSE	TRUE	FALSE
cg22731637	chr11	45231545	45231546	SYT13	57586	76337	CGI-S-Shore	FALSE	TRUE	FALSE
cg22740547	chr11	13030876	13030877	RASSF10	644943	-92	CGI	TRUE	FALSE	FALSE
cg22755008	chr11	1715418	1715419	KRTAP5-6	440023	-3005	CGI	FALSE	TRUE	FALSE
cg23034356	chr11	66035437	66035438	RAB1B	81876	-617	CGI	TRUE	FALSE	FALSE
cg23220012	chr11	69355713	69355714	CCND1	595	-100158	CGI-N-Shore	FALSE	FALSE	TRUE
cg23230554	chr11	66335282	66335283	CTSF	8722	763	CGI-N-Shore	FALSE	TRUE	FALSE
cg23397571	chr11	6440463	6440464	APBB1	322	179	CGI	TRUE	TRUE	FALSE
cg23406642	chr11	68549255	68549256	MTL5	9633	-30266	CGI-N-Shore	FALSE	TRUE	FALSE
cg23582982	chr11	47416109	47416110	SPI1	6688	-15981	CGI-N-Shore	FALSE	TRUE	FALSE
cg23599460	chr11	65030075	65030076	POLA2	23649	642	CGI-S-Shore	FALSE	TRUE	FALSE
cg23951171	chr11	3003090	3003091	NAP1L4	4676	10515	Non-CGI	FALSE	TRUE	FALSE
cg23963595	chr11	95657224	95657225	MTMR2	8898	145	CGI	TRUE	FALSE	FALSE
cg24077593	chr11	47421745	47421746	SPI1	6688	-21617	CGI	FALSE	TRUE	FALSE
cg24088639	chr11	34937564	34937565	PDHX	8050	-111	CGI	TRUE	TRUE	FALSE
cg24238564	chr11	65779343	65779344	CST6	1474	-117	CGI	TRUE	FALSE	FALSE
cg24414039	chr11	76777997	76777998	CAPN5	726	4	CGI	TRUE	FALSE	FALSE
cg24418621	chr11	129993688	129993689	ST14	6768	-35992	CGI	FALSE	TRUE	FALSE
cg24435401	chr11	66187533	66187534	NPAS4	266743	-940	CGI	TRUE	FALSE	FALSE
cg24456602	chr11	85358928	85358929	TMEM126A	84233	-33	CGI	TRUE	FALSE	FALSE
cg24466610	chr11	433702	433703	ANO9	338440	8307	CGI	FALSE	TRUE	FALSE
cg24488506	chr11	65667952	65667953	FOSL1	8061	43	CGI	TRUE	FALSE	FALSE
cg24680082	chr11	93275719	93275720	C11orf75	56935	825	CGI-N-Shore	FALSE	TRUE	FALSE
cg24728180	chr11	68133235	68133236	LRP5	4041	53126	CGI	FALSE	TRUE	FALSE
cg24792813	chr11	118978076	118978077	C2CD2L	9854	-15	CGI	TRUE	FALSE	FALSE
cg25139843	chr11	26353094	26353095	ANO3	63982	142264	CGI-N-Shore	TRUE	TRUE	FALSE
cg25221653	chr11	93276592	93276593	C11orf75	56935	-45	CGI	TRUE	FALSE	FALSE
cg25435338	chr11	68193570	68193571	PPP6R3	55291	-34614	CGI-S-Shore	FALSE	TRUE	FALSE
cg25455598	chr11	3829824	3829825	NUP98	4928	-10801	CGI	TRUE	TRUE	FALSE
cg25533556	chr11	20385280	20385281	HTATIP2	10553	48	CGI	TRUE	FALSE	FALSE
cg25784936	chr11	123612228	123612229	ZNF202	7753	133	CGI	FALSE	TRUE	FALSE
cg25845326	chr11	3249789	3249790	MRGPRE	116534	3825	CGI	TRUE	TRUE	FALSE
cg25999043	chr11	6502655	6502656	TIMM10B	26515	-20	CGI	TRUE	FALSE	FALSE
cg26172195	chr11	68972651	68972652	MYEOV	26579	-88969	CGI	FALSE	FALSE	TRUE
cg26375147	chr11	60674132	60674133	PRPF19	27339	-70	CGI	TRUE	FALSE	FALSE
cg26503877	chr11	128391429	128391430	ETS1	2113	66022	CGI-N-Shore	FALSE	TRUE	FALSE
cg26583055	chr11	124670419	124670420	MSANTD2	79684	-119	CGI	TRUE	FALSE	FALSE
cg26686277	chr11	6281104	6281105	CCKBR	887	199	CGI	TRUE	FALSE	FALSE
cg26758986	chr11	74022882	74022883	P4HA3	283208	-182	CGI	TRUE	TRUE	FALSE
cg26808779	chr11	119487753	119487754	PVRL1	5818	111680	Non-CGI	FALSE	FALSE	TRUE
cg26954736	chr11	73693896	73693897	UCP2	7351	-6	CGI	TRUE	FALSE	FALSE
cg26977644	chr11	79149294	79149295	TENM4	26011	2399	CGI	FALSE	TRUE	FALSE
cg26986841	chr11	85956224	85956225	EED	8726	417	CGI	TRUE	FALSE	FALSE
cg26992415	chr11	94533087	94533088	AMOTL1	154810	31578	CGI	FALSE	TRUE	FALSE
cg27090029	chr11	72408394	72408395	PDE2A	5138	-22896	CGI	FALSE	TRUE	FALSE
cg27118761	chr11	17756479	17756480	KCNC1	3746	-1014	CGI	TRUE	FALSE	FALSE
cg27186271	chr11	842611	842612	POLR2L	5441	-81	CGI	TRUE	FALSE	FALSE
cg27205687	chr11	106888787	106888788	GUCY1A2	2977	382	CGI	TRUE	FALSE	FALSE
cg27362439	chr11	66234280	66234281	PELI3	246330	481	CGI	TRUE	TRUE	FALSE
cg27445893	chr11	67159421	67159422	RAD9A	5883	0	CGI	TRUE	FALSE	FALSE
cg27455796	chr11	45868850	45868851	CRY2	1408	180	CGI	TRUE	TRUE	FALSE
cg00239654	chr12	56660898	56660899	COQ10A	93058	255	CGI	TRUE	FALSE	FALSE
cg00845942	chr12	64062724	64062725	DPY19L2	283417	-369	CGI	TRUE	FALSE	FALSE
cg00920818	chr12	47473421	47473422	PCED1B	91523	34	CGI	TRUE	FALSE	FALSE
cg01168890	chr12	133167806	133167807	LRCOL1	100507055	19229	CGI	FALSE	FALSE	TRUE
cg01307526	chr12	122252471	122252472	SETD1B	23067	9832	CGI	FALSE	TRUE	FALSE
cg01485790	chr12	124911358	124911359	FAM101A	144347	137647	CGI	FALSE	TRUE	FALSE
cg01588444	chr12	132924320	132924321	GALNT9	50614	-18414	CGI	FALSE	FALSE	TRUE
cg01635736	chr12	132902607	132902608	GALNT9	50614	3296	CGI-S-Shore	FALSE	TRUE	FALSE
cg01639485	chr12	31226718	31226719	DDX11	1663	-59	CGI	TRUE	FALSE	FALSE
cg01688293	chr12	133428407	133428408	GOLGA3	2802	-22980	CGI-S-Shore	FALSE	TRUE	FALSE
cg01701504	chr12	132682608	132682609	NOC4L	79050	53614	CGI	FALSE	TRUE	FALSE
cg01783706	chr12	49739991	49739992	DNAJC22	79962	-1048	CGI	TRUE	FALSE	FALSE
cg01850464	chr12	32552279	32552280	FGD4	121512	-86625	CGI	FALSE	FALSE	TRUE
cg01940855	chr12	104852355	104852356	CHST11	50515	1662	CGI	FALSE	TRUE	FALSE
cg01971880	chr12	34474637	34474638	ALG10	84920	299420	CGI	FALSE	FALSE	TRUE
cg02009256	chr12	56882326	56882327	GLS2	27165	-144	CGI	TRUE	FALSE	FALSE
cg02062348	chr12	124196676	124196677	ATP6V0A2	23545	-187	CGI-N-Shore	TRUE	FALSE	FALSE
cg02668471	chr12	110011326	110011327	MMAB	326625	30	CGI	TRUE	FALSE	FALSE
cg02802309	chr12	49628458	49628459	TUBA1C	84790	6748	CGI	FALSE	TRUE	FALSE
cg02818811	chr12	75728458	75728459	GLIPR1L1	256710	-3	CGI	TRUE	TRUE	FALSE
cg03159877	chr12	118199247	118199248	KSR2	283455	206779	CGI-S-Shore	FALSE	TRUE	FALSE
cg03221366	chr12	131943548	131943549	SFSWAP	6433	-252085	CGI-S-Shore	FALSE	FALSE	TRUE
cg03223126	chr12	111471192	111471193	CUX2	23316	-634	CGI	TRUE	FALSE	FALSE
cg03313451	chr12	124383345	124383346	CCDC92	80212	73816	CGI	FALSE	TRUE	FALSE
cg03549571	chr12	49488198	49488199	DHH	50846	402	CGI	TRUE	FALSE	FALSE
cg03733196	chr12	52445075	52445076	C12orf44	60673	-18681	CGI	TRUE	TRUE	FALSE
cg03884792	chr12	49372108	49372109	WNT1	7471	-126	CGI	TRUE	FALSE	FALSE
cg04036049	chr12	57923710	57923711	MBD6	114785	7050	Non-CGI	FALSE	TRUE	FALSE
cg04792034	chr12	58263161	58263162	CTDSP2	10106	-22413	CGI-S-Shelf	FALSE	FALSE	TRUE
cg04797323	chr12	93966978	93966979	SOCS2-AS1	144481	-1433	CGI	TRUE	TRUE	FALSE
cg04956511	chr12	7056008	7056009	PTPN6	5777	267	CGI-S-Shore	FALSE	TRUE	FALSE
cg05432118	chr12	120105824	120105825	PRKAB1	5564	66	CGI	TRUE	FALSE	FALSE
cg05950157	chr12	130603995	130603996	FLJ31485	440119	42771	CGI-N-Shore	FALSE	FALSE	TRUE
cg05978833	chr12	123718415	123718416	C12orf65	91574	570	CGI-S-Shore	TRUE	TRUE	FALSE
cg06192289	chr12	102513805	102513806	NUP37	79023	62	CGI	TRUE	TRUE	FALSE
cg06656689	chr12	108956189	108956190	ISCU	23479	-103	CGI	TRUE	FALSE	FALSE
cg06879608	chr12	124787404	124787405	FAM101A	144347	13693	CGI-N-Shore	FALSE	TRUE	FALSE
cg06911121	chr12	114847164	114847165	TBX5	6910	-916	CGI	TRUE	TRUE	FALSE
cg06927297	chr12	117175889	117175890	C12orf49	79794	-45	CGI	TRUE	FALSE	FALSE
cg06959021	chr12	110348880	110348881	TCHP	84260	10800	CGI-N-Shelf	FALSE	TRUE	FALSE
cg07338958	chr12	50677279	50677280	LIMA1	51474	72	CGI	TRUE	FALSE	FALSE
cg07408211	chr12	64798935	64798936	XPOT	11260	781	CGI	FALSE	TRUE	FALSE
cg07719547	chr12	9102628	9102629	M6PR	4074	-270	CGI	TRUE	FALSE	FALSE
cg07796735	chr12	49932860	49932861	KCNH3	23416	-78	CGI	TRUE	FALSE	FALSE
cg08075204	chr12	51718112	51718113	BIN2	51411	338	CGI	TRUE	TRUE	FALSE
cg08122190	chr12	12503224	12503225	MANSC1	54682	-54	CGI	TRUE	FALSE	FALSE
cg08142063	chr12	64616026	64616027	C12orf66	144577	48	CGI	TRUE	FALSE	FALSE
cg08198711	chr12	4380827	4380828	CCND2	894	-2073	CGI	FALSE	FALSE	TRUE
cg08635685	chr12	131400931	131400932	GPR133	283383	-37519	CGI	FALSE	FALSE	TRUE
cg08965685	chr12	656757	656758	B4GALNT3	283358	87213	CGI	FALSE	TRUE	FALSE
cg08975828	chr12	112280180	112280181	MAPKAPK5	8550	-97	CGI	TRUE	FALSE	FALSE
cg09300324	chr12	132568690	132568691	EP400NL	347918	-136	CGI	TRUE	FALSE	FALSE
cg09597585	chr12	27175842	27175843	MED21	9412	358	CGI	FALSE	TRUE	FALSE
cg09832244	chr12	6729600	6729601	CHD4	1108	-13048	CGI	TRUE	TRUE	FALSE
cg10061107	chr12	50898763	50898764	DIP2B	57609	-3	CGI	TRUE	FALSE	FALSE
cg10086212	chr12	49484169	49484170	DHH	50846	4431	CGI	FALSE	TRUE	FALSE
cg10126874	chr12	107487097	107487098	CRY1	1407	499	CGI	TRUE	FALSE	FALSE
cg10333808	chr12	22487459	22487460	ST8SIA1	6489	187	CGI	TRUE	FALSE	FALSE
cg10360769	chr12	122240872	122240873	LOC338799	338799	516	CGI-S-Shore	TRUE	FALSE	FALSE
cg10500147	chr12	6881601	6881602	LAG3	3902	-67	CGI-N-Shore	TRUE	FALSE	FALSE
cg10602367	chr12	90102554	90102555	LOC338758	338758	-176	CGI	TRUE	FALSE	FALSE
[truncated: 8,885 more rows]
