# Supplementary material for: H3K4me1 marks DNA regions hypomethylated during aging in human stem and differentiated cells
Source: HighWire-hosted journal article supplement (doi:10.1101/gr.169011.113), 2014-09-30
Supplement: Supplemental_Table_20.xlsx [file Supplemental_Table_20.xlsx]

## Sheet: Summary
Supplemental Table 20: Tissue-specificity of the genes showing changes of Euclidean DNA methylation distances with age, according to “up tissue” analysis of DAVID.
group of genes	Category	Term	Genes	FDR
increase in ED (> 2-fold) higher than interindividual variability
	UP_TISSUE	Brain	GDA, AMOTL1, SART3, AMOTL2, LPHN2, LPHN3, ZNF777, PIP5KL1, ZNF776, PPAPDC3, BTBD1, RPLP0, BTBD2, BTBD3, LRRC7, TMEFF2, TMEFF1, NOXA1, BTBD7, ZNF793, SARS2, EIF2AK1, DOC2A, EGFLAM, RCC2, TAGLN, ZNF785, HSD11B1, ADSL, EIF2AK2, EIF2AK4, ORAI2, RALGPS1, DUSP10, CACNB2, FAM19A2, CACNB3, RCC1, FAM19A4, FAM19A5, ATN1, DUSP15, ZAP70, CYP46A1, TAOK2, TAOK1, ACACA, ESRRG, PPAPDC1A, ACACB, ZSCAN1, UBE2L3, Z…	1.23908e-50
	UP_TISSUE	Epithelium	GBGT1, RPLP2, MED24, REST, WTAP, ITSN1, SART3, AMOTL1, MAP3K7, HMHA1, EPC1, MAK16, INCENP, RPLP0, MED26, RPLP1, YEATS2, ZNF101, BSG, TFPT, CYP1A1, LIG1, ZNF507, ANKS3, PTBP1, LIG3, GRIN2A, BSN, MYH9, KIAA1522, JUP, EIF2AK1, RCC2, SCYL1, DHX29, ASCC2, PTRF, JUN, SIPA1L1, ABCA11P, MYBBP1A, UNC13B, EIF2AK4, DCBLD2, ZNF516, SDAD1, CHCHD3, DUSP10, GSTCD, RCC1, LOC407835, SGK223, PEA15, ATN1, C19ORF26,…	8.13351e-05
	UP_TISSUE	Fetal brain	PPP2R5B, MASP1, PPP2R5C, ITSN1, SART3, APP, GRIN2B, GRIN2D, LRRC37A3, ZNF394, TIGD7, MAP2K5, INA, DCDC2, PTPRS, C10ORF2, DCDC1, RYR3, FOXG1, MADCAM1, PPP2R5E, MAPK7, ADAMTS5, SH3GL1, PPP2R3A, ERBB4, C15ORF27, MIPOL1, CACNB2, CACNB3, TRPT1, KCNJ2, DAAM1, DTD1, PPP1R3E, SGK223, SULT4A1, PPP2R2B, NPHP1, SPPL3, CYP46A1, PCDH15, PARP3, CD200, CDC42BPB, GFAP, LEPROTL1, ELF2, GRIP1, GLRA3, AP3S1, LATS1,…	0.000773529
	UP_TISSUE	Hippocampus	FLYWCH1, SYT1, VAPB, PPP2R5A, CRHBP, NELL2, PPP2R5C, LPAR1, ADORA1, CD47, TMEM144, PGPEP1, SERPINE2, ZFP90, CHRNA4, RAPGEF4, CHRNA7, RAB26, FAM53B, FAM181A, ATRNL1, SUCLG2, KIF5A, HKDC1, ZNF48, PTPRR, HTR4, GRIN2A, LIFR, EXD1, CTNNA2, CARNS1, CRHR1, ACAP3, CGN, RYR2, FLII, TGFB1I1, ZIM2, FAM172A, RALYL, TMX1, RHPN2, PCDH20, RAB40B, SULT4A1, NPHP4, ALDH4A1, OLFM3, SGIP1, ABR, MSTO1, MLC1, OSBPL8, …	0.00409373
	UP_TISSUE	Placenta	MEF2A, OSMR, VPS54, ASCC1, VPS53, GFER, LOC400684, WTAP, AMOTL2, DHX38, PPAPDC3, RPLP1, ZNF395, DHX30, SNORA7B, CYP1A1, LRRC1, PTBP1, JUP, PPP1CA, EGFLAM, EIF2AK1, HSD11B2, EIF2AK2, MYBBP1A, CKLF, ALDH4A1, NTHL1, ZC3H14, ACER3, DHX9, TAOK1, PAIP1, ESRRG, GNGT1, RGS2, PKP3, POP7, BCKDK, ATP10B, TSG101, GTSE1, SNAP47, USP10, FOXB1, BHLHE41, ERRFI1, USP15, BRD9, ALS2CL, ZC3H7A, SLC3A2, LRRC28, MMP16…	0.0111576
	UP_TISSUE	Kidney	BTD, CRHBP, RPLP2, ITSN1, MED21, AMOTL2, EPC2, ZNF777, ZNF396, ZNF394, VNN2, PDPN, NOXA1, LRRC2, KIF5C, MECOM, EGFLAM, CD320, MED15, HSD11B2, UNC13B, SH3GL1, ATP12A, SCRIB, SLC29A3, ARIH2, UBASH3B, SLC29A4, RIBC2, ARG2, DUSP15, AHNAK2, ALDH4A1, C19ORF25, LFNG, NAT14, SPPL3, ACER3, LAPTM4A, PAIP1, ESRRG, RGS9BP, C19ORF10, RGS3, AGXT2, PARP3, RGS9, FOXI1, GFAP, SLC20A1, AP2S1, CWC15, BNIP3, INSRR, …	0.0137579
	UP_TISSUE	Cerebellum	SNCG, XRCC3, LTBP3, SYT2, ZNF57, ZNF250, MED22, SGMS1, SHF, SLC26A10, MEI1, CDH20, BDNF, C1ORF74, KCNK9, TRAK2, GRIN2B, PPP1R1B, APOE, HOMER3, PRRT1, CLK4, GIT2, GRID2, NSMAF, AUP1, OXR1, OSBP2, F10, PCID2, BARHL1, MDGA1, LRRC2, GRIN2A, EXD3, WDR90, CARNS1, DEPDC5, GRB10, MGAT3, TRAPPC9, MAPK4, RYR2, LAMC2, MAD2L2, IRAK1BP1, PNMA1, GCNT2, HLA-DRB1, GNAI2, DNAH17, PTH1R, C3ORF18, RUNDC3B, RUNDC3A,…	0.0472694
increase in ED (> 2-fold) lower than interindividual variability
	UP_TISSUE	Brain	SCN3B, AMOTL1, AMOTL2, LPHN2, LPHN3, ZNF777, PIP5KL1, PPAPDC3, BTBD2, BTBD3, TMEFF2, LRRC6, NDNL2, NOXA1, EOMES, BTBD7, SARS2, BTBD9, EIF2AK1, DOC2A, EGFLAM, RCC2, ZNF785, ADSL, SCN1A, RALGPS1, SCN1B, CACNB1, CACNB2, CACNB3, CACNB4, FAM19A4, FAM19A5, ATN1, DUSP15, DUSP16, ZAP70, TAOK1, ACACA, ESRRG, PPAPDC1A, NXF1, ACACB, ZSCAN1, UBE2L3, CDC42BPA, PARP3, PARP1, CDC42BPB, GFAP, ZNFX1, NUAK1, CILP2…	1.42938e-46
	UP_TISSUE	Epithelium	PPP2R5D, RPLP2, MED24, REST, AMOTL1, SART1, MAP3K7, CUL3, HMHA1, EPC1, INCENP, MED26, VPS4B, TFPT, CYP1A1, RREB1, LIG1, ANKS3, LIG3, GRIN2A, BSN, MED13, MYH9, NCAPD3, MARK2, TMEM131, JUP, EIF2AK1, RCC2, PTRF, JUN, SIPA1L1, MAPK3, PRKRIP1, ABCA11P, MAPK8, CRTC3, DCBLD2, ZNF516, RALGPS2, CACNB1, GSTCD, ARFGEF1, SGK223, PFN1, PEA15, PFN2, ATN1, C1ORF52, C19ORF26, SERF2, DHX57, ZC3H14, ASXL2, ZC3H13,…	4.88498e-13
	UP_TISSUE	Fetal brain	MEF2C, PPP2R5B, MASP1, PPP2R5D, PPP2R5C, APP, GRIN2B, GRIN2D, LRRC37A3, ZNF394, TIGD7, MAP2K5, INA, WNT10B, NODAL, CRTAP, DCDC2, PTPRS, FOXG1, MAPK8, MADCAM1, PPP2R5E, MAPK7, ADAMTS5, SH3GL1, PPP2R3A, ERBB4, MIPOL1, C15ORF27, CACNB2, CACNB3, TRPT1, DAAM1, DTD1, PPP1R3E, SGK223, SULT4A1, ARIH1, DUSP18, PPP2R2B, NPHP1, DMBX1, ZC3H13, BRI3BP, PARP3, CDC42BPB, RTN4, GFAP, LZTS1, LXN, GRIP1, UBE2G1, M…	8.96684e-05
decrease in ED (> 2-fold) lower than interindividual variability
	UP_TISSUE	Brain	CDIPT, SCN3B, VPS52, VPRBP, RCE1, RADIL, AMOTL1, SART3, AMOTL2, LPHN2, LPHN3, MAP3K5, ZNF776, PPAPDC3, DHX38, DHX37, RAB27B, LRRC7, RAB27A, LPHN1, CYP1A1, SCN2B, ANKS3, EOMES, BTBD7, SIPA1L3, ZNF792, ISG20L2, BTBD9, SARS2, THY1, DCAF4, EIF2AK1, AQR, RCC2, DHX29, ROR1, ZNF384, ADSL, EIF2AK2, MYBBP1A, DNAH10, SCN1A, NFKBIE, DUSP10, CACNB1, FAM19A2, CACNB4, RCC1, ASL, XAB2, ARIH1, KBTBD2, KBTBD4, DU…	3.45019e-33
	UP_TISSUE	Epithelium	RPLP2, REST, ITSN2, ITSN1, SART3, AMOTL1, WTAP, SART1, HMHA1, EPC1, MED26, RPLP1, VPS4B, CYP1A1, RREB1, LIG1, ANKS3, NCAPD3, NCAPD2, MARK2, TMEM131, JUP, KIAA1522, EIF2AK1, RCC2, SCYL1, PTRF, DHX29, JUN, MYBBP1A, DCBLD2, RALGPS2, OSTF1, DUSP10, CACNB1, GSTCD, RCC1, ARFGEF2, NCAPG2, C1ORF52, SERF2, DHX57, ASXL2, DHX8, ZC3H18, TAOK1, NDC80, ATM, VDAC1, NOLC1, MLYCD, PKP3, PKP4, POP1, POP5, PLCXD2, …	1.19774e-18
	UP_TISSUE	Placenta	CDIPT, OSMR, VPS54, VPS53, MED23, WTAP, AMOTL2, SART1, AGTR1, EPC1, DHX38, PPAPDC3, ILK, RPLP1, SERPINE1, TMEM14B, TMEM14C, HIGD1B, CYP1A1, CRTAP, LIFR, F7, LPCAT4, GLTP, NCAPD3, MARK2, JUP, NPC1, PPP1CA, EIF2AK1, NLE1, HSD11B2, PPP2R5E, MADCAM1, MAPK7, EIF2AK2, MYBBP1A, HSPBAP1, CHCHD1, PABPC4, DUSP12, SLC29A1, SLC29A2, UBASH3B, CKLF, ALDH4A1, SERF2, NTHL1, ACER3, ZC3H15, TAOK1, PAIP1, TAOK3, ES…	0.00012495
	UP_TISSUE	Lymph	XRCC3, RPL13, U2AF2, PITPNB, CHMP7, STAT5B, NAA15, HIRA, INTS1, CD52, SGMS1, WDR81, FLI1, NT5C2, DDX10, SYK, ZNF43, ESCO1, POLG, YY1, RCOR1, NUDT15, ZHX2, OLFML2A, PIM3, ALDH16A1, ERGIC1, RIC8A, ACAP3, SMARCAL1, TGFBRAP1, MRPL47, GIGYF2, ACAA1, CDV3, GSDMD, BOP1, IGF2BP3, TAGLN2, CDC37, HADHA, TK1, NAA50, C1ORF50, HLA-DOA, TCF25, UNC119, ODC1, NRBF2, SPNS3, IKZF1, OSBPL8, TRIO, TKT, NDC80, FNIP2,…	0.00135422
	UP_TISSUE	Eye	SCAF1, MED25, NAA16, ZNF253, SART3, B2M, MAP3K5, RPLP1, AUP1, CDH23, SYK, ZNF644, LIG1, SARS2, NCAPD3, THY1, ZNF234, SPAG9, SCYL1, NME1, WDR89, ZNHIT1, ADSL, ABAT, YME1L1, MYBBP1A, DBNDD1, ADSS, ZNF610, RCC1, ZNF618, SLC29A2, VWA5B2, HEXIM2, KBTBD4, LPCAT1, WDR53, ZNF70, DHX57, ACER3, KLF10, PCNT, ESRRG, PIBF1, GAS7, SNORD52, UPF3A, KCNJ4, MLYCD, HEBP2, CCDC151, HPCA, MAP4, H3F3A, H3F3B, CDC42BPB…	0.00964041
	UP_TISSUE	Melanoma	GNA13, NRTN, FASTKD2, SNRPD1, CSPG4, ACSS2, RNF213, WDR81, PNN, BATF, GALR1, LIX1L, CDCA2, RBM12, FNDC3B, PTPRK, ESCO1, CRLS1, MFI2, ZNF48, YTHDF1, IL24, HLA-B, KIAA1467, SLTM, PODXL2, RCC2, ZNF786, NFE2L2, ANAPC7, SUPT6H, ZNF430, ENPP2, PNPT1, ST8SIA1, MUM1, XAB2, PDSS2, ZNF598, MAML3, ATRIP, B4GALT7, OR2C3, GIT1, RAB8B, SMYD3, RPL23A, FOXP4, ATAD1, MPRIP, PLEKHA4, EPS15, CORO1C, CORO1B, MYO10, …	0.0157401
	UP_TISSUE	Ovary	SLC9A9, HMGN1, PITPNA, CHMP7, BTC, NAA15, FAM105B, RPLP2, RCE1, ZNF251, HS2ST1, FAM124A, GET4, CLPTM1L, TMEM147, HOOK2, ACBD3, PPP1R1B, CLK2, WWP2, CH25H, HIST1H2BI, RPL12, ITFG3, SYK, FAM181A, MATN2, F11R, BYSL, UBR2, SYNJ2BP, CD40, COLEC11, LPCAT4, BCL2L10, OGFOD1, RND2, MKS1, PNKP, EIF2AK1, NPC2, NOP2, PARP14, JUN, RPS14, HSD11B2, ANAPC7, MRPL45, EXT2, BIN2, ACAA1, IQCB1, SIVA1, CCDC96, HSPBAP…	0.0332002
decrease in ED (> 2-fold) higher than interindividual variability
	UP_TISSUE	Brain	VPRBP, SART3, AMOTL1, LPHN3, PPAPDC3, BTBD3, LRRC7, LPHN1, IKBKAP, NDNL2, SCN2B, EOMES, BTBD9, SARS2, DOC2A, EGFLAM, RCC2, ZNF785, ADSL, EIF2AK3, CACNB1, DUSP10, CACNB2, FAM19A1, RCC1, FAM19A5, DHX8, ESRRA, TAOK2, CYP46A1, ACACA, PPAPDC1A, ACACB, UBE2L3, PRPSAP1, ZSCAN2, DUSP26, CDC42BPA, PARP3, ACAD11, KIAA1377, CDC42BPB, ZNFX1, MGRN1, EVI5, TICAM1, MTERF, AIFM3, ARHGEF18, CACNG7, SDK1, ARHGEF12…	2.81629e-32
	UP_TISSUE	Epithelium	GBGT1, ITSN2, SART3, AMOTL1, SART1, MAP3K7, CUL3, MAK16, INCENP, MED26, YEATS2, PDHA2, MCRS1, TFPT, CYP1A1, BRAF, RREB1, ANKS3, PTBP1, UBE2J1, LIG3, MED13, NCAPD3, NCAPD2, MARK2, TMEM131, JUP, KIAA1522, RCC2, ASCC2, JUN, KIAA1524, ABCA11P, UNC13B, RALGPS2, SDAD1, DUSP10, CACNB1, GSTCD, RCC1, ARFGEF1, LOC407835, PFN1, SGK223, C1ORF52, SERF2, ASXL2, DHX8, ESRRA, ZC3H18, ACACA, ATR, VDAC2, ATM, VDAC…	3.95107e-19
	UP_TISSUE	Muscle	FAM110A, SCAF1, KIFC1, XRCC3, RPL19, HMGN2, RPL14, PGF, UTRN, RP9, RAB1B, AURKA, EPT1, RORA, AMOTL1, OGDH, MEGF10, ZNRF3, ACTG1, WDR74, GOT2, RAPGEF3, ITFG1, KIF5B, STC2, MATN1, UBE2J1, MYLK2, WDR83, RFC5, PPP1CA, RCC2, MTF1, COLQ, EIF2S2, ST14, RYR1, YME1L1, LRCH3, LRCH4, EEFSEC, KIF26A, DBN1, HIGD2A, ADD1, MPST, LMNB2, DHFRL1, HSPA1A, CHEK1, BOP1, CHEK2, DUSP11, RCC1, ACP1, ATP6V0B, TIPRL, SLC2…	9.72648e-07
	UP_TISSUE	Uterus	XRCC5, HGSNAT, KIFC1, MEF2A, LSM6, PGAM1, INTS1, ZNF638, INTS3, SART3, OGDH, MED20, CUL3, ACTG1, MAP3K7, MAMSTR, OGN, SH3YL1, HIST1H2BK, MAK16, MED26, INTS7, PIK3C3, LUC7L2, GNG7, MCRS1, TFPT, KIF5B, OLFML2B, C16ORF62, HMG20B, ZNF503, WDR91, BCL2L12, WDR90, ERMAP, ADAMTS6, SPAG7, TRAPPC9, ASCC2, RCC2, MED16, ZNF783, JUN, KIAA1524, MED18, WFDC1, PPP2R5E, ATPIF1, CHORDC1, ZNF614, ORAI1, SDAD1, HLA-…	2.9834e-05
	UP_TISSUE	Skin	PDP1, A2M, RPL14, VPS54, RPL15, XRCC6, PGAM1, INTS1, GFER, MPV17, VPRBP, ZNF638, RADIL, INTS3, ITSN2, AMOTL1, SART3, ANKLE2, TMEM140, B2M, CUL3, ACTG1, CUL2, SERPINE2, NAA11, SBSN, INTS7, MED27, WDR77, PHTF1, CDCA2, LUC7L2, GNG2, TMEM14C, CDCA4, ITFG1, GNG7, WNT10A, TFPT, C20ORF112, AIG1, PTBP1, EXD3, HMG20B, ZNF503, PCLO, CCDC132, C10ORF2, ERGIC3, WDR92, TRAPPC9, ASCC2, ASCC3, MED16, RPS14, TRAP…	5.91187e-05
	UP_TISSUE	Eye	SCAF1, FLYWCH1, MED25, SART3, B2M, ACTG1, TAF5L, MAP3K5, APP, HIST1H2BN, WDR76, CDH23, PCID2, SARS2, NCAPD3, THY1, SPAG9, SSTR2, NME2, WDR89, ADSL, ABAT, YME1L1, CRTC1, RCC1, PPCDC, SLC29A3, SLC29A2, VWA5B2, RPS29, LPCAT1, WDR53, NUDC, ARHGEF10L, LAPTM4B, DNMT3A, ACER3, PAIP2, ACACA, PIBF1, VDAC2, GAS7, DVL1, TMEM116, MLYCD, HPCA, CCDC151, H3F3A, MAP4, CDC42BPB, RTN4, SH3RF1, LEPROTL1, TSG101, PH…	0.00608313
	UP_TISSUE	Amygdala	FLYWCH1, MEF2A, GPR124, SYT3, CCDC149, CLK1, INTS3, OGN, DDX17, PGPEP1, RUNDC1, APP, FAM171B, SMOX, PELI3, TIGD6, ITFG3, LRRC7, KIF13B, GNG7, PLD6, EMX2, ZNF649, DCTN4, DCTN1, TMEM132D, BTBD9, GCC2, TMEM132C, THY1, C1ORF86, CRHR2, CCR6, EIF2S2, PDE4DIP, TMEM184B, SLC30A10, MYO18A, ZIM2, RALYL, LPPR2, RER1, FAM19A1, TMEM128, SGK223, WDR52, VWA5B2, LPCAT1, CRMP1, ALDH4A1, IQSEC1, SGIP1, PHYHIPL, AB…	0.00609765
