# Supplementary material for: H3K4me1 marks DNA regions hypomethylated during aging in human stem and differentiated cells
Source: HighWire-hosted journal article supplement (doi:10.1101/gr.169011.113), 2014-09-30
Supplement: Supplemental_Table_21.xlsx [file Supplemental_Table_21.xlsx]

## Sheet: ST21
Supplemental Table 21: GO (top 20) of the genes showing changes of Euclidean DNA methylation distances with age.
group of genes	GO ID	Term	FDR
increase in ED (> 2-fold) higher than interindividual variability
	GO:0007399	nervous system development	0
	GO:0048731	system development	1.33461e-26
	GO:0048856	anatomical structure development	1.40875e-25
	GO:0022008	neurogenesis	4.11917e-25
	GO:0007275	multicellular organismal development	6.54947e-25
	GO:0048699	generation of neurons	7.31564e-24
	GO:0009653	anatomical structure morphogenesis	1.23575e-23
	GO:0044767	single-organism developmental process	1.55351e-23
	GO:0030182	neuron differentiation	2.90401e-23
	GO:0032502	developmental process	1.28518e-22
	GO:0048468	cell development	1.28518e-22
	GO:0044707	single-multicellular organism process	5.84173e-22
	GO:0048513	organ development	2.43031e-20
	GO:0048869	cellular developmental process	3.19394e-20
	GO:0030154	cell differentiation	3.62487e-19
	GO:0007267	cell-cell signaling	3.62487e-19
	GO:0032501	multicellular organismal process	6.17875e-19
	GO:0048598	embryonic morphogenesis	1.65736e-18
	GO:0035637	multicellular organismal signaling	3.84456e-17
	GO:0019226	transmission of nerve impulse	4.68284e-17
increase in ED (> 2-fold) lower than interindividual variability
	GO:0007399	nervous system development	0
	GO:0022008	neurogenesis	3.50953e-25
	GO:0048699	generation of neurons	8.4031e-25
	GO:0030182	neuron differentiation	3.13057e-24
	GO:0048468	cell development	4.20155e-22
	GO:0044767	single-organism developmental process	9.3917e-19
	GO:0048856	anatomical structure development	1.4829e-18
	GO:0009653	anatomical structure morphogenesis	3.74256e-18
	GO:0048666	neuron development	8.65025e-18
	GO:0031175	neuron projection development	9.886e-18
	GO:0032502	developmental process	9.3917e-17
	GO:0048812	neuron projection morphogenesis	1.43796e-16
	GO:0030030	cell projection organization	4.11917e-16
	GO:0048731	system development	4.18254e-16
	GO:0007275	multicellular organismal development	6.00221e-16
	GO:0048869	cellular developmental process	7.24973e-16
	GO:0032990	cell part morphogenesis	9.26812e-16
	GO:0000902	cell morphogenesis	9.59524e-16
	GO:0048858	cell projection morphogenesis	1.4829e-15
	GO:0032989	cellular component morphogenesis	1.66501e-15
decrease in ED (> 2-fold) lower than interindividual variability
	GO:0009987	cellular process	1.63152e-09
	GO:0048468	cell development	1.854e-06
	GO:0016043	cellular component organization	4.12e-06
	GO:0071840	cellular component organization or bioge...	5.562e-06
	GO:0044763	single-organism cellular process	3.65856e-05
	GO:0030182	neuron differentiation	6.04267e-05
	GO:0031323	regulation of cellular metabolic process	6.04267e-05
	GO:0051056	regulation of small GTPase mediated sign...	6.04267e-05
	GO:0048699	generation of neurons	6.04267e-05
	GO:0048812	neuron projection morphogenesis	6.18e-05
	GO:0007399	nervous system development	6.18e-05
	GO:0032989	cellular component morphogenesis	6.18e-05
	GO:0022008	neurogenesis	6.18e-05
	GO:0048666	neuron development	6.18e-05
	GO:0000904	cell morphogenesis involved in different...	6.18e-05
	GO:0010604	positive regulation of macromolecule met...	6.18e-05
	GO:0009790	embryo development	6.39812e-05
	GO:0032990	cell part morphogenesis	7.416e-05
	GO:0048858	cell projection morphogenesis	7.80632e-05
	GO:0000902	cell morphogenesis	8.8992e-05
decrease in ED (> 2-fold) higher than interindividual variability
	GO:0009987	cellular process	1.6068e-08
	GO:0071840	cellular component organization or bioge...	1.6068e-08
	GO:0016043	cellular component organization	3.09e-08
	GO:0006996	organelle organization	3.09e-08
	GO:0006357	regulation of transcription from RNA pol...	1.4832e-07
	GO:0044237	cellular metabolic process	4.7792e-07
	GO:0044260	cellular macromolecule metabolic process	4.944e-07
	GO:0034641	cellular nitrogen compound metabolic pro...	6.04267e-07
	GO:0006366	transcription from RNA polymerase II pro...	6.04267e-07
	GO:0044763	single-organism cellular process	1.4832e-06
	GO:0006807	nitrogen compound metabolic process	1.88771e-06
	GO:0051173	positive regulation of nitrogen compound...	2.1012e-06
	GO:0045893	positive regulation of transcription, DN...	2.41707e-06
	GO:0048468	cell development	2.41707e-06
	GO:0006139	nucleobase-containing compound metabolic...	2.41707e-06
	GO:0046483	heterocycle metabolic process	2.41707e-06
	GO:0044767	single-organism developmental process	2.41707e-06
	GO:0051254	positive regulation of RNA metabolic pro...	2.41707e-06
	GO:0010628	positive regulation of gene expression	2.57608e-06
	GO:0045935	positive regulation of nucleobase-contai...	2.9664e-06
