# Supplementary material for: H3K4me1 marks DNA regions hypomethylated during aging in human stem and differentiated cells
Source: HighWire-hosted journal article supplement (doi:10.1101/gr.169011.113), 2014-09-30
Supplement: Supplemental_Table_22.xlsx [file Supplemental_Table_22.xlsx]

## Sheet: ST22
Supplemental Table 22: List of hypomethylated CpG sites where the Euclidean distance (ED) between MZ twins increased (> 2-fold) with age
Target ID	Chromosome	start	end	nearest.gene	nearest.gene.id	disttotss	hmm.cpgi	prom.reg	intra.reg	inter.reg
cg00031456	chr1	109234919	109234920	PRPF38B	55119	-11	CGI	TRUE	FALSE	FALSE
cg00349061	chr1	26371865	26371866	SLC30A2	7780	737	CGI-N-Shore	FALSE	TRUE	FALSE
cg00894697	chr1	20826246	20826247	MUL1	79594	8426	CGI-N-Shore	FALSE	TRUE	FALSE
cg02100343	chr1	31538517	31538518	PUM1	9698	244	CGI	TRUE	TRUE	FALSE
cg02276822	chr1	3559697	3559698	WRAP73	49856	6972	CGI	FALSE	TRUE	FALSE
cg03254465	chr1	3240227	3240228	ARHGEF16	27237	-130918	CGI	FALSE	TRUE	FALSE
cg03526503	chr1	28198483	28198484	THEMIS2	9473	-570	CGI-N-Shore	TRUE	FALSE	FALSE
cg04484947	chr1	32931323	32931324	ZBTB8A	653121	664	CGI-S-Shore	FALSE	TRUE	FALSE
cg04835163	chr1	74663899	74663900	FPGT-TNNI3K	100526835	2	CGI	TRUE	FALSE	FALSE
cg04990202	chr1	153581750	153581751	S100A16	140576	3762	Non-CGI	TRUE	TRUE	FALSE
cg05523370	chr1	150293897	150293898	PRPF3	9129	-29	CGI	TRUE	FALSE	FALSE
cg05630111	chr1	150948030	150948031	CERS2	29956	-550	CGI-S-Shore	TRUE	FALSE	FALSE
cg05650453	chr1	7432644	7432645	VAMP3	9341	-398683	Non-CGI	FALSE	TRUE	FALSE
cg05962079	chr1	2428333	2428334	PLCH2	9651	20578	CGI	TRUE	TRUE	FALSE
cg06173481	chr1	153658650	153658651	NPR1	4881	7485	CGI-N-Shelf	FALSE	TRUE	FALSE
cg06205922	chr1	1473141	1473142	TMEM240	339453	2597	CGI-S-Shore	FALSE	TRUE	FALSE
cg06909773	chr1	22151328	22151329	LDLRAD2	401944	12569	CGI-S-Shore	FALSE	TRUE	FALSE
cg07049833	chr1	222791172	222791173	MIA3	375056	-270	CGI	TRUE	FALSE	FALSE
cg07959491	chr1	204347150	204347151	LINC00628	127841	-8302	CGI	FALSE	FALSE	TRUE
cg08008854	chr1	146643751	146643752	PRKAB2	5565	376	CGI	FALSE	TRUE	FALSE
cg08856919	chr1	8484157	8484158	SLC45A1	50651	99766	CGI	TRUE	TRUE	FALSE
cg08887707	chr1	3613723	3613724	TP73	7161	44593	CGI-N-Shore	TRUE	TRUE	FALSE
cg09144608	chr1	2098929	2098930	C1orf86	199990	40241	CGI-S-Shore	TRUE	TRUE	FALSE
cg09276842	chr1	1155026	1155027	TNFRSF4	7293	-5477	CGI	TRUE	TRUE	FALSE
cg09769134	chr1	67217769	67217770	TCTEX1D1	200132	-369	CGI-N-Shore	TRUE	FALSE	FALSE
cg10210571	chr1	231664364	231664365	TSNAX-DISC1	100303453	-33	CGI	TRUE	FALSE	FALSE
cg10709494	chr1	115323130	115323131	SIKE1	80143	176	CGI	TRUE	FALSE	FALSE
cg10785099	chr1	200969816	200969817	KIF21B	23046	23010	CGI	FALSE	TRUE	FALSE
cg11378242	chr1	244999800	244999801	COX20	116228	1160	CGI-S-Shore	FALSE	TRUE	FALSE
cg12081443	chr1	4037236	4037237	LOC728716	728716	36563	CGI	FALSE	FALSE	TRUE
cg12097325	chr1	1076431	1076432	LOC254099	254099	4033	CGI	FALSE	TRUE	FALSE
cg12406825	chr1	117452407	117452408	PTGFRN	5738	-280	CGI	TRUE	FALSE	FALSE
cg12651044	chr1	150241550	150241551	APH1A	51107	57	CGI	TRUE	FALSE	FALSE
cg12663321	chr1	46972470	46972471	DMBX1	127343	-196	Non-CGI	TRUE	FALSE	FALSE
cg12666727	chr1	42128487	42128488	EDN2	1907	-178142	CGI	FALSE	TRUE	FALSE
cg13077490	chr1	10459573	10459574	PGD	5226	487	CGI	FALSE	TRUE	FALSE
cg13566436	chr1	25240865	25240866	RUNX3	864	50745	CGI-N-Shore	FALSE	TRUE	FALSE
cg13857689	chr1	26672613	26672614	AIM1L	55057	8006	Non-CGI	FALSE	TRUE	FALSE
cg14015211	chr1	223315766	223315767	TLR5	7100	856	CGI-N-Shore	FALSE	TRUE	FALSE
cg15108640	chr1	240071966	240071967	RPS7P5	645884	-98856	CGI	TRUE	TRUE	FALSE
cg15818358	chr1	42501757	42501758	HIVEP3	59269	-160	CGI	TRUE	FALSE	FALSE
cg15892864	chr1	161444516	161444517	FCGR2A	2212	-30687	CGI-S-Shore	FALSE	FALSE	TRUE
cg16411979	chr1	117603108	117603109	TTF2	8458	158	CGI	FALSE	TRUE	FALSE
cg16658130	chr1	40942841	40942842	ZFP69	339559	-459	CGI	TRUE	FALSE	FALSE
cg17786206	chr1	29142254	29142255	OPRD1	4985	3599	CGI-S-Shelf	FALSE	TRUE	FALSE
cg17973565	chr1	153606594	153606595	S100A13	6284	-25	CGI	TRUE	FALSE	FALSE
cg18146737	chr1	92946700	92946701	GFI1	2672	5731	CGI	FALSE	TRUE	FALSE
cg18172804	chr1	146714232	146714233	CHD1L	9557	-57	CGI	TRUE	FALSE	FALSE
cg18275321	chr1	70820640	70820641	HHLA3	11147	146	CGI	TRUE	FALSE	FALSE
cg20011075	chr1	4008090	4008091	LOC728716	728716	7417	Non-CGI	FALSE	TRUE	FALSE
cg20511194	chr1	45987619	45987620	PRDX1	5052	941	CGI	TRUE	TRUE	FALSE
cg20773915	chr1	6171788	6171789	CHD5	26038	68404	CGI	FALSE	TRUE	FALSE
cg20846236	chr1	32645337	32645338	TXLNA	200081	-6	CGI	TRUE	FALSE	FALSE
cg21826784	chr1	11795937	11795938	AGTRAP	57085	-203	CGI-N-Shore	TRUE	FALSE	FALSE
cg21868050	chr1	155231980	155231981	SCAMP3	10067	194	CGI	TRUE	FALSE	FALSE
cg21877201	chr1	47070058	47070059	MOB3C	148932	12503	CGI	TRUE	TRUE	FALSE
cg21930399	chr1	94883754	94883755	ABCD3	5825	-177	CGI	TRUE	FALSE	FALSE
cg22333259	chr1	19394757	19394758	IFFO2	126917	-111930	Non-CGI	FALSE	FALSE	TRUE
cg22380385	chr1	1885948	1885949	TMEM52	339456	-35207	CGI-N-Shore	FALSE	TRUE	FALSE
cg22451657	chr1	6558088	6558089	PLEKHG5	57449	21979	CGI	TRUE	TRUE	FALSE
cg22536808	chr1	45965870	45965871	MMACHC	25974	13	CGI	TRUE	FALSE	FALSE
cg22790758	chr1	15013167	15013168	KAZN	23254	87953	Non-CGI	FALSE	TRUE	FALSE
cg22871801	chr1	19245969	19245970	ALDH4A1	8659	-16675	CGI	FALSE	TRUE	FALSE
cg23244095	chr1	1476269	1476270	TMEM240	339453	-528	CGI	TRUE	FALSE	FALSE
cg23670372	chr1	10732290	10732291	CASZ1	54897	124415	CGI-N-Shore	FALSE	TRUE	FALSE
cg24003898	chr1	36348317	36348318	2001-08-01	26523	12907	CGI-N-Shore	TRUE	TRUE	FALSE
cg24400630	chr1	89728035	89728036	GBP5	115362	10507	Non-CGI	FALSE	TRUE	FALSE
cg24709511	chr1	2251570	2251571	LOC100129534	100129534	32528	CGI-S-Shore	FALSE	FALSE	TRUE
cg25346059	chr1	154599894	154599895	ADAR	103	560	CGI	FALSE	TRUE	FALSE
cg25408271	chr1	91486822	91486823	ZNF644	84146	988	CGI-N-Shore	FALSE	TRUE	FALSE
cg25975165	chr1	2444426	2444427	PANK4	55229	13607	CGI	FALSE	TRUE	FALSE
cg26606184	chr1	207495047	207495048	CD55	1604	229	CGI	TRUE	FALSE	FALSE
cg27314669	chr1	156822430	156822431	INSRR	3645	6280	CGI-S-Shelf	FALSE	TRUE	FALSE
cg27332243	chr1	154842767	154842768	KCNN3	3782	-12	CGI-S-Shelf	TRUE	FALSE	FALSE
cg00216693	chr2	131913247	131913248	PLEKHB2	55041	50826	CGI	FALSE	TRUE	FALSE
cg01077058	chr2	241083864	241083865	OTOS	150677	-3790	Non-CGI	FALSE	FALSE	TRUE
cg01724041	chr2	208393966	208393967	CREB1	1385	-648	CGI-N-Shore	TRUE	FALSE	FALSE
cg01744130	chr2	86667850	86667851	KDM3A	55818	-419	CGI-N-Shore	TRUE	FALSE	FALSE
cg03035921	chr2	122407209	122407210	LOC254128	254128	-19	CGI	TRUE	FALSE	FALSE
cg04947065	chr2	3606037	3606038	LOC100506054	100506054	60	CGI	TRUE	FALSE	FALSE
cg05845831	chr2	232476255	232476256	C2orf57	165100	18679	CGI-N-Shelf	FALSE	FALSE	TRUE
cg06642617	chr2	73461528	73461529	CCT7	10574	163	CGI	TRUE	TRUE	FALSE
cg07417218	chr2	242255421	242255422	HDLBP	3069	-305	CGI	TRUE	TRUE	FALSE
cg07867558	chr2	219524465	219524466	BCS1L	617	85	CGI	TRUE	FALSE	FALSE
cg08385249	chr2	128433373	128433374	LIMS2	55679	5985	CGI	TRUE	TRUE	FALSE
cg09580478	chr2	16689509	16689510	FAM49A	81553	157623	CGI	FALSE	FALSE	TRUE
cg09840623	chr2	42396402	42396403	EML4	27436	-86	CGI	TRUE	FALSE	FALSE
cg10239991	chr2	240046227	240046228	MIR4441	100616493	-38604	CGI	FALSE	TRUE	FALSE
cg10582499	chr2	232675501	232675502	COPS7B	64708	29055	Non-CGI	FALSE	FALSE	TRUE
cg10773869	chr2	70057052	70057053	GMCL1	64395	233	CGI	TRUE	FALSE	FALSE
cg10803714	chr2	69399575	69399576	MIR3126	100423030	68760	Non-CGI	FALSE	TRUE	FALSE
cg11125589	chr2	74153979	74153980	DGUOK	1716	25	CGI	TRUE	FALSE	FALSE
cg11380327	chr2	24715213	24715214	NCOA1	8648	-71964	CGI	FALSE	FALSE	TRUE
cg11989674	chr2	175351902	175351903	GPR155	151556	-90	CGI	TRUE	FALSE	FALSE
cg11990559	chr2	240727278	240727279	LOC150935	150935	42723	CGI-S-Shore	FALSE	FALSE	TRUE
cg12547218	chr2	240153820	240153821	MGC16025	85009	-36666	CGI-S-Shore	FALSE	TRUE	FALSE
cg14552895	chr2	64068982	64068983	UGP2	7360	883	CGI	TRUE	TRUE	FALSE
cg15423357	chr2	25149977	25149978	ADCY3	109	-7921	CGI	FALSE	FALSE	TRUE
cg15910994	chr2	97001734	97001735	NCAPH	23397	249	CGI	FALSE	TRUE	FALSE
cg16405026	chr2	145281942	145281943	ZEB2-AS1	100303491	-3475	CGI	FALSE	FALSE	TRUE
cg17156491	chr2	43259508	43259509	ZFP36L2	678	194235	Non-CGI	FALSE	FALSE	TRUE
cg18126883	chr2	112641630	112641631	ANAPC1	64682	109	CGI	TRUE	FALSE	FALSE
cg18310707	chr2	70121019	70121020	SNRNP27	11017	-54	CGI-N-Shore	TRUE	FALSE	FALSE
cg18524934	chr2	97164073	97164074	NEURL3	93082	9771	CGI-N-Shelf	FALSE	TRUE	FALSE
cg18549688	chr2	236299625	236299626	AGAP1	116987	-103106	CGI-N-Shore	FALSE	FALSE	TRUE
cg19303849	chr2	145090156	145090157	GTDC1	79712	-72	CGI	TRUE	FALSE	FALSE
cg20019365	chr2	219134978	219134979	AAMP	14	-84	CGI	TRUE	FALSE	FALSE
cg20931705	chr2	101042998	101042999	CHST10	9486	-8867	CGI	FALSE	FALSE	TRUE
cg21083314	chr2	27994244	27994245	MRPL33	9553	-338	CGI-N-Shore	TRUE	FALSE	FALSE
cg21117965	chr2	220325369	220325370	SPEG	10290	25668	Non-CGI	TRUE	TRUE	FALSE
cg21270243	chr2	216176248	216176249	ATIC	471	-429	CGI-N-Shore	TRUE	FALSE	FALSE
cg21926875	chr2	47596410	47596411	EPCAM	4072	122	CGI	TRUE	FALSE	FALSE
cg23563438	chr2	173292207	173292208	ITGA6	3655	124	CGI	TRUE	TRUE	FALSE
cg24607290	chr2	64751503	64751504	AFTPH	54812	63	CGI	TRUE	FALSE	FALSE
cg24681695	chr2	170550946	170550947	CCDC173	129881	-14	CGI	TRUE	FALSE	FALSE
cg25023043	chr2	84743684	84743685	DNAH6	1768	104	CGI	TRUE	FALSE	FALSE
cg25656144	chr2	28614171	28614172	FOSL2	2355	-1496	CGI	TRUE	TRUE	FALSE
cg01951420	chr3	121553821	121553822	IQCB1	9657	103	CGI	TRUE	FALSE	FALSE
cg02056280	chr3	178866391	178866392	PIK3CA	5290	79	CGI	TRUE	TRUE	FALSE
cg02569554	chr3	197280980	197280981	BDH1	622	19212	CGI-N-Shore	FALSE	TRUE	FALSE
cg02858214	chr3	182400605	182400606	ATP11B	23200	-110684	CGI	FALSE	FALSE	TRUE
cg03863817	chr3	96495925	96495926	EPHA6	285220	-37498	CGI	FALSE	FALSE	TRUE
cg04231166	chr3	185655124	185655125	TRA2B	6434	798	CGI	TRUE	TRUE	FALSE
cg04412755	chr3	46939978	46939979	PTH1R	5745	20741	CGI	FALSE	TRUE	FALSE
cg04468081	chr3	182983386	182983387	B3GNT5	84002	12353	Non-CGI	FALSE	TRUE	FALSE
cg04554240	chr3	138170552	138170553	ESYT3	83850	17136	CGI-N-Shore	FALSE	TRUE	FALSE
cg04808658	chr3	52470040	52470041	SEMA3G	56920	9001	Non-CGI	FALSE	TRUE	FALSE
cg07889826	chr3	50127152	50127153	RBM5	10181	810	CGI-S-Shore	FALSE	TRUE	FALSE
cg10349197	chr3	52801074	52801075	NEK4	6787	3889	CGI-N-Shelf	FALSE	TRUE	FALSE
cg10908625	chr3	152881181	152881182	RAP2B	5912	1151	CGI	TRUE	FALSE	FALSE
cg10923475	chr3	194406558	194406559	FAM43A	131583	-62	CGI	TRUE	FALSE	FALSE
cg12359592	chr3	138048777	138048778	NME9	347736	-48	CGI	TRUE	FALSE	FALSE
cg12370175	chr3	123031942	123031943	SEC22A	26984	111167	Non-CGI	FALSE	TRUE	FALSE
cg12624667	chr3	36986555	36986556	TRANK1	9881	-6	CGI	TRUE	FALSE	FALSE
cg12662555	chr3	57742520	57742521	SLMAP	7871	-652	CGI	TRUE	FALSE	FALSE
cg12739914	chr3	195552429	195552430	MUC4	4585	-13584	CGI	FALSE	FALSE	TRUE
cg13024018	chr3	133380790	133380791	TOPBP1	11073	-52	CGI	TRUE	FALSE	FALSE
cg13878677	chr3	13060915	13060916	IQSEC1	9922	53700	Non-CGI	FALSE	TRUE	FALSE
cg14781521	chr3	129063090	129063091	H1FX	8971	-27969	CGI	FALSE	FALSE	TRUE
cg14919823	chr3	14166510	14166511	TMEM43	79188	69	CGI	TRUE	FALSE	FALSE
cg15028458	chr3	58860290	58860291	C3orf67	200844	175466	Non-CGI	FALSE	TRUE	FALSE
cg15038286	chr3	128200723	128200724	GATA2	2624	11305	CGI-N-Shore	FALSE	TRUE	FALSE
cg15738605	chr3	186080208	186080209	DGKG	1608	-184	CGI	TRUE	FALSE	FALSE
cg16811230	chr3	39149235	39149236	TTC21A	199223	82	CGI	TRUE	FALSE	FALSE
cg18772127	chr3	32443496	32443497	CMTM7	112616	10332	CGI-S-Shore	FALSE	TRUE	FALSE
cg19456938	chr3	114012806	114012807	TIGIT	201633	651	Non-CGI	TRUE	FALSE	FALSE
cg19631064	chr3	197807355	197807356	ANKRD18DP	348840	185	CGI	TRUE	FALSE	FALSE
cg21664636	chr3	70432664	70432665	MITF	4286	644077	Non-CGI	FALSE	FALSE	TRUE
cg21766308	chr3	151178904	151178905	IGSF10	285313	-2406	CGI	FALSE	FALSE	TRUE
cg22304507	chr3	136537863	136537864	SLC35G2	80723	1	CGI	TRUE	FALSE	FALSE
cg22617878	chr3	10417183	10417184	MIR885	100126334	19061	Non-CGI	FALSE	TRUE	FALSE
cg23162967	chr3	105587981	105587982	CBLB	868	283	CGI	TRUE	TRUE	FALSE
cg25445931	chr3	142575504	142575505	PCOLCE2	26577	32539	Non-CGI	FALSE	TRUE	FALSE
cg25611254	chr3	124931985	124931986	SLC12A8	84561	66104	CGI	TRUE	TRUE	FALSE
cg26115449	chr3	180707572	180707573	DNAJC19	131118	-9	CGI	TRUE	FALSE	FALSE
cg27222803	chr3	193310868	193310869	OPA1	4976	-63	CGI	TRUE	FALSE	FALSE
cg00463561	chr4	110737452	110737453	GAR1	54433	785	CGI	TRUE	TRUE	FALSE
cg01425021	chr4	1995036	1995037	MIR943	100126332	-6831	CGI-S-Shore	TRUE	TRUE	FALSE
cg01552919	chr4	901847	901848	GAK	2580	24325	CGI	FALSE	TRUE	FALSE
cg03222374	chr4	3773996	3773997	ADRA2C	152	5699	CGI	FALSE	FALSE	TRUE
cg03838806	chr4	6477277	6477278	PPP2R2C	5522	88048	CGI-S-Shelf	FALSE	TRUE	FALSE
cg05144635	chr4	7218707	7218708	SORCS2	57537	24332	CGI-S-Shore	FALSE	TRUE	FALSE
cg05874882	chr4	1763078	1763079	FGFR3	2261	-31959	CGI	FALSE	FALSE	TRUE
cg07951488	chr4	41992560	41992561	SLC30A9	10463	36	CGI	TRUE	FALSE	FALSE
cg08825286	chr4	10089919	10089920	MIR3138	100423011	-9602	CGI	FALSE	TRUE	FALSE
cg10160807	chr4	3677497	3677498	LOC100133461	100133461	2083	Non-CGI	FALSE	TRUE	FALSE
cg10521403	chr4	1763211	1763212	FGFR3	2261	-31826	CGI	FALSE	FALSE	TRUE
cg12221318	chr4	8648164	8648165	CPZ	8532	65946	CGI	FALSE	FALSE	TRUE
cg12455762	chr4	40859095	40859096	NSUN7	79730	107180	CGI	TRUE	TRUE	FALSE
cg13036321	chr4	166248467	166248468	MSMO1	6307	-349	CGI-N-Shore	TRUE	FALSE	FALSE
cg13191718	chr4	39184141	39184142	WDR19	57728	116	CGI	TRUE	FALSE	FALSE
cg13644262	chr4	6449564	6449565	PPP2R2C	5522	115761	CGI-N-Shore	FALSE	TRUE	FALSE
cg14451728	chr4	57092248	57092249	KIAA1211	57482	55886	Non-CGI	FALSE	TRUE	FALSE
cg14527262	chr4	1202653	1202654	LOC100130872	100130872	95	CGI	TRUE	FALSE	FALSE
cg15874062	chr4	143767647	143767648	INPP4B	8821	-42	CGI	TRUE	FALSE	FALSE
cg16150307	chr4	157119998	157119999	CTSO	1519	-244949	CGI	FALSE	FALSE	TRUE
cg16957523	chr4	11431359	11431360	HS3ST1	9957	-821	CGI	TRUE	FALSE	FALSE
cg17362483	chr4	177420127	177420128	SPCS3	60559	179036	Non-CGI	FALSE	FALSE	TRUE
cg17717282	chr4	81307915	81307916	C4orf22	255119	51040	CGI	FALSE	TRUE	FALSE
cg18123043	chr4	1022462	1022463	FGFRL1	53834	17521	CGI-N-Shore	FALSE	FALSE	TRUE
cg18123319	chr4	73433788	73433789	ADAMTS3	9508	726	CGI-N-Shore	FALSE	TRUE	FALSE
cg18352616	chr4	3374830	3374831	HGFAC	3083	-68894	CGI	FALSE	TRUE	FALSE
cg19326382	chr4	185913864	185913865	HELT	391723	-26129	CGI	FALSE	FALSE	TRUE
cg20533530	chr4	3443694	3443695	HGFAC	3083	-30	CGI-N-Shelf	TRUE	FALSE	FALSE
cg20591353	chr4	4171354	4171355	OTOP1	133060	57265	CGI	FALSE	FALSE	TRUE
cg21942184	chr4	719614	719615	PCGF3	10336	20040	CGI	FALSE	TRUE	FALSE
cg22140614	chr4	887730	887731	GAK	2580	38442	CGI	FALSE	TRUE	FALSE
cg23377495	chr4	100963223	100963224	LOC256880	256880	91586	Non-CGI	FALSE	FALSE	TRUE
cg25670583	chr4	715865	715866	PCGF3	10336	16291	CGI	FALSE	TRUE	FALSE
cg26105156	chr4	81951953	81951954	BMP3	651	-164	CGI	TRUE	FALSE	FALSE
cg00530568	chr5	135587383	135587384	LOC389332	389332	-58531	CGI	FALSE	TRUE	FALSE
cg02304092	chr5	126409227	126409228	C5orf63	401207	-42	CGI	TRUE	FALSE	FALSE
cg02328545	chr5	180030008	180030009	SCGB3A1	92304	-11520	CGI-S-Shore	FALSE	TRUE	FALSE
cg02444433	chr5	23507469	23507470	PRDM9	56979	-253	CGI	TRUE	FALSE	FALSE
cg03727213	chr5	177740217	177740218	AGXT2L2	85007	-80413	CGI	FALSE	TRUE	FALSE
cg04058281	chr5	980580	980581	LOC100506688	100506688	16873	CGI-S-Shore	FALSE	FALSE	TRUE
cg04562394	chr5	126073718	126073719	LMNB1	4001	-38595	Non-CGI	FALSE	FALSE	TRUE
cg05173828	chr5	1382175	1382176	CLPTM1L	81037	-37172	CGI-S-Shore	TRUE	FALSE	FALSE
cg05262724	chr5	31908436	31908437	MIR4279	100422874	27827	CGI	FALSE	TRUE	FALSE
cg05625559	chr5	6775922	6775923	MIR4278	100422999	52110	CGI-S-Shore	FALSE	FALSE	TRUE
cg05922971	chr5	43121458	43121459	ZNF131	7690	472	CGI	TRUE	TRUE	FALSE
cg06010443	chr5	178594583	178594584	ZNF354C	30832	106975	CGI-S-Shore	FALSE	TRUE	FALSE
cg06651505	chr5	166802425	166802426	TENM2	57451	90581	CGI	FALSE	TRUE	FALSE
cg06742628	chr5	16886424	16886425	MYO10	4651	49959	Non-CGI	FALSE	TRUE	FALSE
cg06802812	chr5	40679165	40679166	PTGER4	5734	-865	CGI-N-Shore	TRUE	FALSE	FALSE
cg07011961	chr5	23507594	23507595	PRDM9	56979	-128	CGI	TRUE	FALSE	FALSE
cg07697189	chr5	171766855	171766856	UBTD2	92181	-56059	CGI-S-Shore	FALSE	TRUE	FALSE
cg07760269	chr5	760077	760078	TPPP	11076	-66566	CGI-S-Shore	FALSE	FALSE	TRUE
cg08371532	chr5	172982357	172982358	LOC285593	285593	-24287	CGI-N-Shore	FALSE	FALSE	TRUE
cg08888487	chr5	1124759	1124760	SLC12A7	10723	-12586	CGI	FALSE	FALSE	TRUE
cg08979191	chr5	132113734	132113735	2008-09-01	23176	-172	CGI-S-Shore	TRUE	FALSE	FALSE
cg09077340	chr5	153418539	153418540	MFAP3	4238	19	CGI	TRUE	FALSE	FALSE
cg10200291	chr5	126409007	126409008	C5orf63	401207	175	CGI-N-Shore	FALSE	TRUE	FALSE
cg10528482	chr5	525771	525772	SLC9A3	6550	-1221	CGI-S-Shore	TRUE	FALSE	FALSE
cg10552847	chr5	74632966	74632967	HMGCR	3156	811	CGI	TRUE	TRUE	FALSE
cg10812634	chr5	126409211	126409212	C5orf63	401207	-26	CGI	TRUE	FALSE	FALSE
cg11093640	chr5	176308026	176308027	HK3	3101	18305	CGI	FALSE	TRUE	FALSE
cg11143131	chr5	131608246	131608247	PDLIM4	8572	14894	CGI	FALSE	TRUE	FALSE
cg11911653	chr5	2170490	2170491	IRX4	50805	-287609	CGI	FALSE	FALSE	TRUE
cg13717023	chr5	53606639	53606640	ARL15	54622	-235	CGI	TRUE	FALSE	FALSE
cg14557064	chr5	1752840	1752841	MIR4277	100422966	-43856	CGI	FALSE	FALSE	TRUE
cg15954782	chr5	132113191	132113192	2008-09-01	23176	368	CGI	TRUE	TRUE	FALSE
cg16635016	chr5	176292569	176292570	HK3	3101	33762	CGI	FALSE	TRUE	FALSE
cg17733824	chr5	1099592	1099593	SLC12A7	10723	12578	CGI	FALSE	TRUE	FALSE
cg18710053	chr5	126409061	126409062	C5orf63	401207	121	CGI-N-Shore	FALSE	TRUE	FALSE
cg18765565	chr5	669397	669398	TPPP	11076	24111	CGI	FALSE	TRUE	FALSE
cg21638645	chr5	1800072	1800073	MRPL36	64979	-115	CGI	TRUE	FALSE	FALSE
cg22054885	chr5	23507450	23507451	PRDM9	56979	-272	CGI	TRUE	FALSE	FALSE
cg22165524	chr5	1213187	1213188	SLC6A19	340024	11476	CGI-S-Shore	FALSE	TRUE	FALSE
cg22905511	chr5	126409198	126409199	C5orf63	401207	-13	CGI	TRUE	FALSE	FALSE
cg23491790	chr5	1053774	1053775	MIR4635	100616479	9313	CGI	FALSE	TRUE	FALSE
cg24756698	chr5	1020022	1020023	NKD2	85409	10853	CGI	FALSE	TRUE	FALSE
cg24943459	chr5	1039407	1039408	MIR4635	100616479	23680	CGI	FALSE	FALSE	TRUE
cg25472530	chr5	23507617	23507618	PRDM9	56979	-105	CGI	TRUE	FALSE	FALSE
cg25592564	chr5	4866442	4866443	LOC340094	340094	-168028	CGI	FALSE	FALSE	TRUE
cg26144909	chr5	2262036	2262037	IRX4	50805	-379155	CGI	FALSE	FALSE	TRUE
cg27097438	chr5	126409153	126409154	C5orf63	401207	29	CGI	TRUE	FALSE	FALSE
cg00175859	chr6	138428631	138428632	PERP	64065	27	CGI	TRUE	FALSE	FALSE
cg00512454	chr6	36709214	36709215	CDKN1A	1026	64976	Non-CGI	FALSE	TRUE	FALSE
cg01402746	chr6	30616468	30616469	C6orf136	221545	1651	CGI-S-Shore	FALSE	TRUE	FALSE
cg01927730	chr6	168955764	168955765	SMOC2	64094	113932	CGI-S-Shore	FALSE	TRUE	FALSE
cg02145102	chr6	31276418	31276419	HLA-C	3107	-36504	CGI	FALSE	TRUE	FALSE
cg02712746	chr6	13574844	13574845	SIRT5	23408	82	CGI	TRUE	FALSE	FALSE
cg02816367	chr6	112081490	112081491	FYN	2534	113163	Non-CGI	TRUE	TRUE	FALSE
cg03265892	chr6	142468362	142468363	VTA1	51534	-46	CGI	TRUE	FALSE	FALSE
cg03329755	chr6	167189272	167189273	RPS6KA2	6196	86497	CGI	FALSE	TRUE	FALSE
cg03438552	chr6	32805548	32805549	TAP2	6891	997	CGI-N-Shore	TRUE	TRUE	FALSE
cg03475293	chr6	7051303	7051304	RREB1	6239	-56525	CGI	FALSE	FALSE	TRUE
cg03527422	chr6	99282736	99282737	POU3F2	5454	155	CGI	TRUE	FALSE	FALSE
cg04406910	chr6	31926623	31926624	SKIV2L	6499	41	CGI	TRUE	TRUE	FALSE
cg05183646	chr6	134491143	134491144	HMGA1P7	387065	-52324	CGI	FALSE	TRUE	FALSE
cg05209770	chr6	89827644	89827645	SRSF12	135295	154	CGI	TRUE	FALSE	FALSE
cg05583848	chr6	35265411	35265412	DEF6	50619	-182	CGI-N-Shore	TRUE	FALSE	FALSE
cg06642177	chr6	134496341	134496342	HMGA1P7	387065	-57522	CGI	TRUE	TRUE	FALSE
cg06824988	chr6	31852982	31852983	SLC44A4	80736	-6158	CGI-S-Shore	TRUE	TRUE	FALSE
cg07178031	chr6	27778236	27778237	HIST1H3H	8357	2258	CGI	TRUE	FALSE	FALSE
cg08383338	chr6	46703225	46703226	PLA2G7	7941	203	CGI	TRUE	TRUE	FALSE
cg09060588	chr6	88299742	88299743	RARS2	57038	-6	CGI	TRUE	FALSE	FALSE
cg09374123	chr6	150379008	150379009	ULBP3	79465	11273	CGI	FALSE	FALSE	TRUE
cg10023652	chr6	163661541	163661542	PACRG-AS1	285796	83962	CGI	FALSE	TRUE	FALSE
cg10099585	chr6	36853529	36853530	PPIL1	51645	-10728	CGI-N-Shore	TRUE	TRUE	FALSE
cg10169971	chr6	83902988	83902989	RWDD2A	112611	-42	CGI	TRUE	TRUE	FALSE
cg10978034	chr6	33129988	33129989	COL11A2	1302	30255	CGI-S-Shore	FALSE	FALSE	TRUE
cg11946459	chr6	29911558	29911559	HLA-A	3105	1310	CGI-S-Shore	TRUE	TRUE	FALSE
cg12078775	chr6	30419543	30419544	HLA-E	3133	-37638	CGI	FALSE	FALSE	TRUE
cg13934406	chr6	32120878	32120879	PRRT1	80863	-17	CGI	TRUE	TRUE	FALSE
cg14566281	chr6	168482448	168482449	FRMD1	79981	-2608	CGI-S-Shore	FALSE	FALSE	TRUE
cg14790552	chr6	30866999	30867000	MIR4640	100616237	8338	Non-CGI	FALSE	TRUE	FALSE
cg15025383	chr6	31548669	31548670	LTB	4050	1531	CGI	FALSE	TRUE	FALSE
cg15392101	chr6	12426773	12426774	EDN1	1906	136243	Non-CGI	FALSE	FALSE	TRUE
cg15552206	chr6	25710535	25710536	HIST1H2AA	221613	16253	CGI	FALSE	FALSE	TRUE
cg16332927	chr6	37461350	37461351	CCDC167	154467	6348	CGI	FALSE	TRUE	FALSE
cg16958849	chr6	33800769	33800770	MLN	4295	-28975	CGI	FALSE	FALSE	TRUE
cg17513325	chr6	166892216	166892217	MIR1913	100302141	30703	CGI	FALSE	TRUE	FALSE
cg18729896	chr6	31126345	31126346	TCF19	6941	41	CGI	TRUE	FALSE	FALSE
cg18740289	chr6	2437142	2437143	GMDS	2762	-191273	Non-CGI	FALSE	TRUE	FALSE
cg19273746	chr6	71666063	71666064	B3GAT2	135152	723	CGI	TRUE	FALSE	FALSE
cg20635821	chr6	18011761	18011762	KIF13A	63971	-23906	CGI	FALSE	FALSE	TRUE
cg21001008	chr6	31368503	31368504	MICA	100507436	941	CGI-S-Shore	TRUE	FALSE	FALSE
cg21156577	chr6	32163485	32163486	GPSM3	63940	-184	CGI	TRUE	TRUE	FALSE
cg21178851	chr6	160500620	160500621	LOC729603	729603	-13492	CGI-N-Shore	FALSE	TRUE	FALSE
cg22060817	chr6	126080723	126080724	HEY2	23493	11942	CGI	FALSE	TRUE	FALSE
cg22937695	chr6	28979355	28979356	ZNF311	282890	-6261	CGI	FALSE	FALSE	TRUE
cg23493127	chr6	144164392	144164393	LTV1	84946	-114	CGI	TRUE	FALSE	FALSE
cg23664192	chr6	34725288	34725289	SNRPC	6631	416	CGI	TRUE	FALSE	FALSE
cg24022821	chr6	28831886	28831887	LOC401242	401242	-431	CGI	TRUE	FALSE	FALSE
cg24201362	chr6	467681	467682	IRF4	3662	75941	CGI-S-Shore	FALSE	FALSE	TRUE
cg24376689	chr6	32016336	32016337	CYP21A2	1589	10242	CGI	TRUE	TRUE	FALSE
cg24444521	chr6	28104462	28104463	ZKSCAN8	7745	-5252	CGI-N-Shore	FALSE	TRUE	FALSE
cg25006721	chr6	170481752	170481753	LOC154449	154449	89903	CGI	FALSE	FALSE	TRUE
cg25637655	chr6	29911542	29911543	HLA-A	3105	1294	CGI-S-Shore	TRUE	TRUE	FALSE
cg00151571	chr7	140179449	140179450	MKRN1	23608	-79	CGI	TRUE	FALSE	FALSE
cg01008256	chr7	100463985	100463986	TRIP6	7205	-963	CGI	TRUE	TRUE	FALSE
cg01106572	chr7	150744384	150744385	ASIC3	9311	-1219	CGI-N-Shore	TRUE	TRUE	FALSE
cg01708711	chr7	75959031	75959032	HSPB1	3315	27155	CGI	FALSE	TRUE	FALSE
cg02057013	chr7	1778923	1778924	ELFN1	392617	30124	CGI	FALSE	TRUE	FALSE
cg03871124	chr7	1643681	1643682	TFAMP1	260341	-10423	CGI	FALSE	FALSE	TRUE
cg03919453	chr7	150820344	150820345	AGAP3	116988	37389	CGI	TRUE	TRUE	FALSE
cg04109092	chr7	2647852	2647853	TTYH3	80727	-23749	CGI-S-Shore	FALSE	TRUE	FALSE
cg04258219	chr7	155142415	155142416	INSIG1	3638	52928	CGI	FALSE	FALSE	TRUE
cg04320354	chr7	77428826	77428827	PHTF2	57157	716	CGI	TRUE	TRUE	FALSE
cg04501438	chr7	21466669	21466670	SP4	6671	-1018	CGI	TRUE	FALSE	FALSE
cg04892724	chr7	4275784	4275785	FOXK1	221937	-407602	CGI	FALSE	TRUE	FALSE
cg05331807	chr7	157224035	157224036	DNAJB6	10049	94324	CGI-N-Shore	FALSE	FALSE	TRUE
cg07076816	chr7	38351154	38351155	TARP	445347	6433	CGI	FALSE	TRUE	FALSE
cg07571734	chr7	151479894	151479895	PRKAG2-AS1	100505483	-94231	CGI-N-Shore	FALSE	TRUE	FALSE
cg08234689	chr7	127910927	127910928	LEP	3952	29595	CGI-N-Shore	FALSE	FALSE	TRUE
cg08235947	chr7	158039076	158039077	MIR595	693180	286427	CGI	FALSE	TRUE	FALSE
cg08702740	chr7	157981275	157981276	LOC100506585	100506585	333997	CGI	FALSE	TRUE	FALSE
cg09040942	chr7	158060003	158060004	MIR595	693180	265500	CGI	FALSE	TRUE	FALSE
cg09124496	chr7	41735851	41735852	INHBA-AS1	285954	2336	CGI-N-Shelf	FALSE	TRUE	FALSE
cg11120115	chr7	98649861	98649862	SMURF1	57154	91880	Non-CGI	FALSE	TRUE	FALSE
cg12340343	chr7	155897383	155897384	SHH	6469	-292415	CGI-N-Shore	FALSE	FALSE	TRUE
cg13330868	chr7	79084196	79084197	MAGI2	9863	-1305	CGI-S-Shore	TRUE	TRUE	FALSE
cg13465292	chr7	9766677	9766678	PER4	168741	92776	CGI	FALSE	FALSE	TRUE
cg13978175	chr7	2648222	2648223	TTYH3	80727	-23379	CGI	FALSE	TRUE	FALSE
cg14158690	chr7	151826540	151826541	GALNT11	63917	103761	CGI	FALSE	FALSE	TRUE
cg14462553	chr7	157444239	157444240	MIR153-2	406945	-77124	CGI	FALSE	TRUE	FALSE
cg15092761	chr7	27779713	27779714	TAX1BP1	8887	720	CGI	TRUE	TRUE	FALSE
cg15391375	chr7	150110226	150110227	LOC728743	728743	12435	CGI	FALSE	FALSE	TRUE
cg15784006	chr7	6692445	6692446	ZNF853	54753	36917	CGI	FALSE	FALSE	TRUE
cg16443926	chr7	1597401	1597402	TMEM184A	202915	-1334	CGI-S-Shelf	TRUE	FALSE	FALSE
cg17551891	chr7	1960795	1960796	MIR4655	100616160	-76905	CGI	FALSE	TRUE	FALSE
cg18362281	chr7	157204364	157204365	DNAJB6	10049	74653	CGI	FALSE	TRUE	FALSE
cg18524788	chr7	25890808	25890809	MIR148A	406940	98796	CGI	FALSE	FALSE	TRUE
cg18650626	chr7	1914073	1914074	MIR4655	100616160	-30183	CGI	FALSE	TRUE	FALSE
cg18790057	chr7	204337	204338	FAM20C	56975	11367	CGI	FALSE	TRUE	FALSE
cg18990050	chr7	1163642	1163643	C7orf50	84310	14249	CGI	FALSE	TRUE	FALSE
cg19381766	chr7	5597647	5597648	ACTB	60	-27414	CGI-S-Shore	FALSE	FALSE	TRUE
cg19757493	chr7	151827396	151827397	GALNT11	63917	104617	CGI-S-Shore	FALSE	FALSE	TRUE
cg20396393	chr7	23720838	23720839	FAM221A	340277	1088	CGI-S-Shore	FALSE	TRUE	FALSE
cg20413415	chr7	43351469	43351470	MIR3943	100500829	160974	CGI	FALSE	TRUE	FALSE
cg21154964	chr7	43484715	43484716	LOC100506895	100506895	77424	CGI	FALSE	TRUE	FALSE
cg24184022	chr7	55431084	55431085	LANCL2	55915	-2055	CGI	FALSE	FALSE	TRUE
cg25134328	chr7	47783668	47783669	LINC00525	84847	-17404	CGI	FALSE	FALSE	TRUE
cg25820728	chr7	1684706	1684707	TFAMP1	260341	30599	CGI-N-Shelf	FALSE	FALSE	TRUE
cg26164907	chr7	155616192	155616193	SHH	6469	-11224	CGI	FALSE	FALSE	TRUE
cg27441228	chr7	128490884	128490885	ATP6V1F	9296	-11971	CGI-S-Shore	FALSE	TRUE	FALSE
cg27450153	chr7	42007440	42007441	INHBA	3624	-264733	CGI-S-Shore	FALSE	TRUE	FALSE
cg01754525	chr8	43131353	43131354	POTEA	340441	-16230	CGI	FALSE	FALSE	TRUE
cg03513643	chr8	145536188	145536189	DGAT1	8694	14377	CGI	FALSE	TRUE	FALSE
cg04364718	chr8	82598634	82598635	IMPA1	3612	-44	CGI	TRUE	FALSE	FALSE
cg05283646	chr8	1105957	1105958	LOC286083	286083	144868	CGI	FALSE	FALSE	TRUE
cg05741837	chr8	27632005	27632006	ESCO2	157570	-51	CGI	TRUE	FALSE	FALSE
cg07129852	chr8	10192067	10192068	PRSS55	203074	-190987	CGI	FALSE	TRUE	FALSE
cg07454640	chr8	140990901	140990902	KCNK9	51305	-275601	CGI	FALSE	TRUE	FALSE
cg07744547	chr8	2046498	2046499	MYOM2	9172	53339	CGI	FALSE	TRUE	FALSE
cg08174789	chr8	2078112	2078113	MYOM2	9172	84953	CGI	FALSE	TRUE	FALSE
cg09129067	chr8	103750904	103750905	KLF10	7071	-82920	CGI-N-Shore	FALSE	FALSE	TRUE
cg09133892	chr8	61325879	61325880	RAB2A	5862	-103588	CGI	FALSE	TRUE	FALSE
cg09817024	chr8	11471395	11471396	LINC00208	83655	37350	CGI-S-Shore	FALSE	FALSE	TRUE
cg10282371	chr8	38854376	38854377	ADAM9	8754	-127	CGI	TRUE	FALSE	FALSE
cg10764196	chr8	10489270	10489271	RP1L1	94137	23345	CGI	FALSE	TRUE	FALSE
cg11699593	chr8	22102731	22102732	POLR3D	661	111	CGI	TRUE	TRUE	FALSE
cg11750431	chr8	144372051	144372052	ZNF696	79943	-1506	CGI	TRUE	FALSE	FALSE
cg13090007	chr8	142981593	142981594	MIR4472-1	100616268	-276105	CGI	FALSE	FALSE	TRUE
cg13155823	chr8	80993721	80993722	MRPS28	28957	-51214	Non-CGI	TRUE	TRUE	FALSE
cg14332120	chr8	97657097	97657098	CPQ	10404	-400	CGI	TRUE	FALSE	FALSE
cg14712794	chr8	25909299	25909300	EBF2	64641	-6658	CGI	FALSE	TRUE	FALSE
cg14733867	chr8	144884056	144884057	MIR937	100126338	11154	CGI	FALSE	TRUE	FALSE
cg16009311	chr8	119086762	119086763	EXT1	2131	37294	CGI	FALSE	TRUE	FALSE
cg17328964	chr8	145687451	145687452	CYHR1	50626	3578	CGI	FALSE	TRUE	FALSE
cg17635777	chr8	142446785	142446786	PTP4A3	11156	14777	CGI-N-Shore	FALSE	TRUE	FALSE
cg20607798	chr8	58055168	58055169	LOC100507651	100507651	-76478	CGI	FALSE	FALSE	TRUE
cg20979042	chr8	144387646	144387647	ZNF696	79943	14086	CGI	FALSE	FALSE	TRUE
cg24046017	chr8	90913265	90913266	OSGIN2	734	-829	CGI-N-Shore	TRUE	FALSE	FALSE
cg24294529	chr8	124170694	124170695	FAM83A	84985	-20591	CGI	TRUE	FALSE	FALSE
cg24379315	chr8	9413445	9413446	TNKS	8658	0	CGI	TRUE	FALSE	FALSE
cg25900150	chr8	144601851	144601852	ZC3H3	23144	21767	CGI-S-Shelf	FALSE	TRUE	FALSE
cg26795011	chr8	145027226	145027227	MIR661	724031	-7778	CGI	FALSE	TRUE	FALSE
cg26969786	chr8	50891848	50891849	SNTG1	54212	69498	CGI	FALSE	TRUE	FALSE
cg27320734	chr8	48744559	48744560	CEBPD	1052	-93832	CGI	FALSE	TRUE	FALSE
cg27509052	chr8	1012324	1012325	LOC286083	286083	238501	CGI-S-Shore	FALSE	TRUE	FALSE
cg13468318	chr9	133874121	133874122	LAMC3	10319	-10381	CGI	FALSE	FALSE	TRUE
cg13476777	chr9	139911684	139911685	C9orf139	401563	-10230	CGI	FALSE	TRUE	FALSE
cg13529314	chr9	132598258	132598259	USP20	10868	561	CGI	TRUE	TRUE	FALSE
cg13544075	chr9	139644102	139644103	LCN6	158062	-1121	CGI-S-Shelf	TRUE	TRUE	FALSE
cg13571460	chr9	124989337	124989338	LHX6	26468	1752	CGI	FALSE	TRUE	FALSE
cg13663644	chr9	990692	990693	DMRT3	58524	13727	CGI	FALSE	TRUE	FALSE
cg13784312	chr9	134609065	134609066	RAPGEF1	2889	6150	Non-CGI	FALSE	TRUE	FALSE
cg13817802	chr9	139587912	139587913	AGPAT2	10555	-6000	CGI-S-Shore	FALSE	FALSE	TRUE
cg13872774	chr9	139657079	139657080	LCN15	389812	1884	CGI-S-Shore	FALSE	TRUE	FALSE
cg13949487	chr9	98637884	98637885	ERCC6L2	375748	-14	CGI	TRUE	TRUE	FALSE
cg13951074	chr9	1045628	1045629	DMRT2	10655	-4716	CGI	FALSE	FALSE	TRUE
cg14011077	chr9	138362327	138362328	LOC100506599	100506599	1766	CGI	FALSE	TRUE	FALSE
cg14078157	chr9	128172775	128172776	GAPVD1	26130	148663	CGI-S-Shore	FALSE	FALSE	TRUE
cg14087921	chr9	138660958	138660959	KCNT1	57582	66926	CGI	FALSE	TRUE	FALSE
cg14255824	chr9	71795999	71796000	TJP2	9414	59818	Non-CGI	FALSE	TRUE	FALSE
cg14392031	chr9	107526202	107526203	NIPSNAP3B	55335	-247	CGI	TRUE	TRUE	FALSE
cg14417917	chr9	140065568	140065569	LRRC26	389816	-1076	CGI-S-Shore	TRUE	FALSE	FALSE
cg14647944	chr9	73095740	73095741	KLF9	687	-66166	Non-CGI	FALSE	FALSE	TRUE
cg00215017	chr10	134818683	134818684	NA	255352	-62593	CGI-N-Shore	FALSE	FALSE	TRUE
cg01263942	chr10	695859	695860	PRR26	414235	-27	CGI-S-Shore	TRUE	TRUE	FALSE
cg02707638	chr10	129924105	129924106	MKI67	4288	361	CGI	TRUE	TRUE	FALSE
cg02737384	chr10	45470199	45470200	C10orf10	11067	4129	CGI	FALSE	TRUE	FALSE
cg03088791	chr10	95754256	95754257	PLCE1	51196	509	CGI	FALSE	TRUE	FALSE
cg03468945	chr10	126107610	126107611	OAT	4942	-64	CGI	TRUE	FALSE	FALSE
cg03647436	chr10	134477441	134477442	NKX6-2	84504	122094	CGI	FALSE	TRUE	FALSE
cg03677069	chr10	88718317	88718318	SNCG	6623	28	CGI-N-Shore	TRUE	FALSE	FALSE
cg03788230	chr10	125816412	125816413	CHST15	51363	36792	CGI	FALSE	TRUE	FALSE
cg04251571	chr10	35416385	35416386	CREM	1390	615	CGI	TRUE	TRUE	FALSE
cg04785299	chr10	134019556	134019557	DPYSL4	10570	19141	CGI	FALSE	FALSE	TRUE
cg04892170	chr10	128076910	128076911	ADAM12	8038	215	CGI	TRUE	FALSE	FALSE
cg04936238	chr10	132999672	132999673	TCERG1L	256536	110310	CGI-N-Shore	FALSE	TRUE	FALSE
cg05098512	chr10	134861083	134861084	GPR123	84435	-23348	CGI	FALSE	FALSE	TRUE
cg05596517	chr10	131320214	131320215	MGMT	4255	54759	CGI-N-Shelf	FALSE	TRUE	FALSE
cg07370771	chr10	135050957	135050958	VENTX	27287	-449	CGI	TRUE	FALSE	FALSE
cg07877987	chr10	133871444	133871445	JAKMIP3	282973	-46867	CGI-S-Shore	FALSE	FALSE	TRUE
cg08904986	chr10	123738373	123738374	NSMCE4A	54780	-3629	CGI	FALSE	FALSE	TRUE
cg09584359	chr10	81056358	81056359	PPIF	10105	-50860	Non-CGI	FALSE	TRUE	FALSE
cg10283338	chr10	105156449	105156450	PDCD11	22984	36	CGI	TRUE	FALSE	FALSE
cg10377903	chr10	101290699	101290700	NKX2-3	159296	-1989	CGI	TRUE	TRUE	FALSE
cg10494449	chr10	134596049	134596050	NKX6-2	84504	3486	CGI-S-Shore	FALSE	TRUE	FALSE
cg10780367	chr10	82213323	82213324	TSPAN14	81619	-713	CGI-N-Shore	TRUE	FALSE	FALSE
cg10830219	chr10	1595940	1595941	ADARB2-AS1	642394	27114	CGI	FALSE	TRUE	FALSE
cg10938586	chr10	97849795	97849796	LOC728558	728558	195	CGI	TRUE	FALSE	FALSE
cg11883161	chr10	99894664	99894665	R3HCC1L	27291	282	CGI	FALSE	TRUE	FALSE
cg11961495	chr10	80873797	80873798	ZMIZ1	57178	45004	Non-CGI	FALSE	TRUE	FALSE
cg12623045	chr10	135067449	135067450	MIR202	574448	-6324	Non-CGI	FALSE	FALSE	TRUE
cg12689227	chr10	123970158	123970159	BTBD16	118663	-60661	CGI	TRUE	TRUE	FALSE
cg14288594	chr10	1460509	1460510	ADARB2-AS1	642394	-108314	CGI-N-Shelf	FALSE	TRUE	FALSE
cg15630743	chr10	134863617	134863618	GPR123	84435	-20814	CGI-S-Shelf	FALSE	FALSE	TRUE
cg15838173	chr10	75533400	75533401	FUT11	170384	1350	CGI-S-Shore	FALSE	TRUE	FALSE
cg16338816	chr10	18948217	18948218	ARL5B	221079	-94	CGI	TRUE	FALSE	FALSE
cg16750801	chr10	129706313	129706314	PTPRE	5791	987	CGI-S-Shore	FALSE	TRUE	FALSE
cg17339484	chr10	62704207	62704208	RHOBTB1	9886	56989	CGI	TRUE	TRUE	FALSE
cg18193259	chr10	98829493	98829494	LOC100505540	100505540	-33018	Non-CGI	FALSE	TRUE	FALSE
cg19489503	chr10	101298812	101298813	NKX2-3	159296	6121	CGI-S-Shore	FALSE	FALSE	TRUE
cg19552690	chr10	134893967	134893968	GPR123	84435	9533	CGI-S-Shore	FALSE	TRUE	FALSE
cg19686940	chr10	128193332	128193333	ADAM12	8038	-116204	CGI	TRUE	TRUE	FALSE
cg19701771	chr10	99401212	99401213	MORN4	118812	-7298	CGI	FALSE	TRUE	FALSE
cg19974131	chr10	86526976	86526977	CCSER2	54462	438565	CGI	FALSE	FALSE	TRUE
cg20199549	chr10	820835	820836	DIP2C	22982	-85226	CGI	FALSE	FALSE	TRUE
cg20415486	chr10	3949206	3949207	KLF6	1316	-121732	Non-CGI	FALSE	FALSE	TRUE
cg22779477	chr10	127408223	127408224	C10orf137	26098	138	CGI	TRUE	FALSE	FALSE
cg23333820	chr10	104165160	104165161	NFKB2	4791	10930	CGI-N-Shelf	FALSE	TRUE	FALSE
cg23351954	chr10	102322556	102322557	HIF1AN	55662	26914	CGI	FALSE	FALSE	TRUE
cg24487372	chr10	73137135	73137136	CDH23	64072	-19554	CGI	FALSE	FALSE	TRUE
cg25446329	chr10	21802824	21802825	SKIDA1	387640	11785	CGI-S-Shelf	TRUE	TRUE	FALSE
cg25651562	chr10	100994143	100994144	HPSE2	60495	1487	CGI	FALSE	TRUE	FALSE
cg25718735	chr10	132959070	132959071	TCERG1L	256536	150912	Non-CGI	FALSE	TRUE	FALSE
cg25830307	chr10	77871644	77871645	C10orf11	83938	329124	CGI-N-Shore	FALSE	TRUE	FALSE
cg26819718	chr10	77872170	77872171	C10orf11	83938	329650	CGI	FALSE	TRUE	FALSE
cg00355019	chr11	119994877	119994878	TRIM29	23650	13984	Non-CGI	FALSE	TRUE	FALSE
cg01926066	chr11	22647397	22647398	FANCF	2188	-9	CGI	TRUE	FALSE	FALSE
cg02248763	chr11	1580098	1580099	DUSP8	1850	13050	CGI-S-Shore	FALSE	TRUE	FALSE
cg02299195	chr11	48185069	48185070	OR4B1	119765	-53291	Non-CGI	FALSE	TRUE	FALSE
cg02341556	chr11	118781978	118781979	BCL9L	283149	-364	CGI-S-Shore	TRUE	FALSE	FALSE
cg02400092	chr11	130185384	130185385	ZBTB44	29068	-776	CGI	TRUE	TRUE	FALSE
cg02734782	chr11	118272031	118272032	ATP5L	10632	-71	CGI	TRUE	FALSE	FALSE
cg03559815	chr11	117199307	117199308	CEP164	22897	6874	CGI	FALSE	TRUE	FALSE
cg04256834	chr11	132502809	132502810	OPCML	4978	899592	Non-CGI	FALSE	TRUE	FALSE
cg05701676	chr11	73018662	73018663	ARHGEF17	9828	-999	CGI	TRUE	FALSE	FALSE
cg05955251	chr11	2447537	2447538	TRPM5	29850	-3261	Non-CGI	FALSE	FALSE	TRUE
cg05964721	chr11	71814458	71814459	LAMTOR1	55004	-24	CGI	TRUE	TRUE	FALSE
cg06581840	chr11	113644397	113644398	ZW10	9183	86	CGI	TRUE	FALSE	FALSE
cg06609250	chr11	85522094	85522095	SYTL2	54843	82	CGI	TRUE	FALSE	FALSE
cg09222269	chr11	119978055	119978056	TRIM29	23650	30806	Non-CGI	FALSE	FALSE	TRUE
cg09491948	chr11	62446595	62446596	UBXN1	51035	-49	CGI	TRUE	FALSE	FALSE
cg09884480	chr11	1967966	1967967	MRPL23	6150	-534	CGI-N-Shore	TRUE	FALSE	FALSE
cg10142520	chr11	65344604	65344605	EHBP1L1	254102	1094	CGI-S-Shore	FALSE	TRUE	FALSE
cg10354134	chr11	47372960	47372961	MYBPC3	4607	1291	CGI-N-Shelf	TRUE	TRUE	FALSE
cg10631284	chr11	65264849	65264850	MALAT1	378938	-382	CGI-N-Shore	TRUE	FALSE	FALSE
cg10870892	chr11	70265971	70265972	CTTN	2017	21358	CGI	TRUE	TRUE	FALSE
cg11338389	chr11	63742044	63742045	COX8A	1351	-33	CGI	TRUE	FALSE	FALSE
cg12625990	chr11	6633090	6633091	TAF10	6881	383	CGI	FALSE	TRUE	FALSE
cg12669354	chr11	831584	831585	CD151	977	-1366	CGI	TRUE	TRUE	FALSE
cg13247673	chr11	1983240	1983241	MRPL23	6150	14737	CGI	FALSE	FALSE	TRUE
cg14418275	chr11	66243281	66243282	DPP3	10072	-4597	CGI	FALSE	TRUE	FALSE
cg15015340	chr11	61486220	61486221	MYRF	745	-33899	Non-CGI	FALSE	TRUE	FALSE
cg15138614	chr11	1858467	1858468	TNNI2	7136	-1764	CGI-S-Shore	TRUE	TRUE	FALSE
cg15451729	chr11	364805	364806	B4GALNT4	338707	-4988	CGI-S-Shore	FALSE	FALSE	TRUE
cg15780465	chr11	617476	617477	IRF7	3665	-1476	CGI	TRUE	TRUE	FALSE
cg16246252	chr11	119535621	119535622	PVRL1	5818	63812	CGI	FALSE	TRUE	FALSE
cg16312514	chr11	70650521	70650522	MIR3664	100500844	67950	CGI-N-Shelf	FALSE	TRUE	FALSE
cg16384957	chr11	1050848	1050849	MUC6	4588	-14141	CGI	FALSE	FALSE	TRUE
cg16400434	chr11	73882363	73882364	PPME1	51400	-3	CGI	TRUE	FALSE	FALSE
cg16508199	chr11	124632390	124632391	ESAM	90952	-166	CGI	TRUE	FALSE	FALSE
cg16725583	chr11	58346524	58346525	ZFP91-CNTF	386607	-61	CGI	TRUE	FALSE	FALSE
cg17315331	chr11	118992129	118992130	HINFP	25988	-102	CGI	TRUE	FALSE	FALSE
cg17376853	chr11	405970	405971	SIGIRR	59307	11425	CGI-S-Shore	FALSE	TRUE	FALSE
cg17585343	chr11	43702103	43702104	HSD17B12	51144	-38	CGI	TRUE	FALSE	FALSE
cg17985533	chr11	2019116	2019117	H19	283120	-50	CGI-S-Shore	TRUE	FALSE	FALSE
cg18319533	chr11	1011315	1011316	MUC6	4588	25389	CGI	FALSE	TRUE	FALSE
cg18872604	chr11	64002754	64002755	VEGFB	7423	697	CGI-S-Shore	FALSE	TRUE	FALSE
cg18896032	chr11	57097718	57097719	TNKS1BP1	85456	-5304	Non-CGI	FALSE	TRUE	FALSE
cg19553869	chr11	66034926	66034927	RAB1B	81876	-1128	CGI	TRUE	TRUE	FALSE
cg19725989	chr11	67007604	67007605	ADRBK1	156	-26299	CGI	TRUE	TRUE	FALSE
cg20171011	chr11	865575	865576	TSPAN4	7106	22750	CGI-N-Shore	FALSE	TRUE	FALSE
cg20843277	chr11	70672365	70672366	MIR3664	100500844	46106	CGI	FALSE	TRUE	FALSE
cg21196659	chr11	66459000	66459001	RBM4B	83759	-13724	CGI	FALSE	TRUE	FALSE
cg21866596	chr11	93474724	93474725	TAF1D	79101	-20	CGI	TRUE	FALSE	FALSE
cg23052669	chr11	65765487	65765488	BANF1	8815	-4061	CGI-N-Shelf	FALSE	TRUE	FALSE
cg24242981	chr11	73472417	73472418	RAB6A	5870	-215	CGI	TRUE	FALSE	FALSE
cg25376032	chr11	1529608	1529609	DUSP8	1850	63540	CGI	FALSE	TRUE	FALSE
cg25801742	chr11	58736104	58736105	GLYATL1	92292	41001	CGI	FALSE	TRUE	FALSE
cg26090849	chr11	1375330	1375331	BRSK2	9024	-35797	CGI	FALSE	FALSE	TRUE
cg26608305	chr11	925416	925417	AP2A2	161	-391	CGI	TRUE	FALSE	FALSE
cg26626251	chr11	132948177	132948178	OPCML	4978	454224	CGI	FALSE	TRUE	FALSE
cg00014484	chr12	131865279	131865280	LOC116437	116437	215722	CGI	FALSE	FALSE	TRUE
cg00219792	chr12	83053315	83053316	TMTC2	160335	-27617	CGI	FALSE	FALSE	TRUE
cg00242561	chr12	56215013	56215014	ORMDL2	29095	3206	CGI-S-Shelf	FALSE	TRUE	FALSE
cg00776080	chr12	53442322	53442323	TENC1	23371	1511	CGI-S-Shore	TRUE	TRUE	FALSE
cg01169073	chr12	112280321	112280322	MAPKAPK5	8550	41	CGI	TRUE	FALSE	FALSE
cg04665124	chr12	130604404	130604405	FLJ31485	440119	42362	CGI	FALSE	FALSE	TRUE
cg04924128	chr12	7342464	7342465	PEX5	5830	704	CGI	TRUE	TRUE	FALSE
cg05712979	chr12	124788814	124788815	FAM101A	144347	15103	CGI	FALSE	TRUE	FALSE
cg05907260	chr12	131872391	131872392	LOC116437	116437	222834	CGI	FALSE	FALSE	TRUE
cg06693138	chr12	6960519	6960520	CDCA3	83461	-62	CGI	TRUE	FALSE	FALSE
cg06768361	chr12	117480333	117480334	TESC	54997	56916	CGI-S-Shelf	FALSE	TRUE	FALSE
cg07130150	chr12	96883863	96883864	CDK17	5128	-89496	CGI-S-Shore	FALSE	TRUE	FALSE
cg10788674	chr12	133214645	133214646	P2RX2	22953	19241	Non-CGI	FALSE	TRUE	FALSE
cg10940055	chr12	132910456	132910457	GALNT9	50614	-4550	CGI	FALSE	FALSE	TRUE
cg12901574	chr12	130931970	130931971	PIWIL1	9271	109536	CGI	FALSE	TRUE	FALSE
cg13033626	chr12	7342228	7342229	PEX5	5830	468	CGI	TRUE	TRUE	FALSE
cg14209005	chr12	21810852	21810853	LDHB	3945	-62	CGI	TRUE	FALSE	FALSE
cg16655778	chr12	132981736	132981737	GALNT9	50614	-75830	CGI-S-Shore	FALSE	FALSE	TRUE
cg18437685	chr12	34554116	34554117	ALG10	84920	378899	CGI	FALSE	FALSE	TRUE
cg18791991	chr12	133056941	133056942	FBRSL1	57666	-10214	CGI	FALSE	FALSE	TRUE
cg19328828	chr12	123215471	123215472	HCAR1	27198	-341	CGI-S-Shore	TRUE	FALSE	FALSE
cg21045306	chr12	57637925	57637926	NDUFA4L2	56901	-3449	CGI-S-Shore	FALSE	TRUE	FALSE
cg22222281	chr12	6308758	6308759	CD9	928	-722	CGI	TRUE	FALSE	FALSE
cg22320999	chr12	113734212	113734213	SLC24A6	80024	38711	CGI-N-Shore	FALSE	TRUE	FALSE
cg22927696	chr12	45269992	45269993	NELL2	4753	37717	CGI	TRUE	TRUE	FALSE
cg23878241	chr12	111019734	111019735	PPTC7	160760	1328	CGI-N-Shore	FALSE	TRUE	FALSE
cg24214867	chr12	568931	568932	B4GALNT3	283358	-610	CGI	TRUE	FALSE	FALSE
cg24886391	chr12	132666527	132666528	NOC4L	79050	37533	CGI	FALSE	FALSE	TRUE
cg25664021	chr12	57595357	57595358	MIR1228	100302201	7069	CGI-N-Shore	FALSE	TRUE	FALSE
cg26037974	chr12	96640840	96640841	ELK3	2004	52632	CGI	FALSE	TRUE	FALSE
cg26639146	chr12	6323224	6323225	CD9	928	13741	Non-CGI	FALSE	TRUE	FALSE
cg26973714	chr12	104609524	104609525	TXNRD1	7296	3035	CGI	TRUE	TRUE	FALSE
cg27522367	chr12	50497732	50497733	GPD1	2819	-67	Non-CGI	TRUE	FALSE	FALSE
cg01517521	chr13	27746040	27746041	USP12	219333	-6	CGI	TRUE	FALSE	FALSE
cg01870456	chr13	111267991	111267992	CARKD	55739	183	CGI	TRUE	FALSE	FALSE
cg05315334	chr13	113656212	113656213	MCF2L-AS1	100289410	-33259	CGI	TRUE	TRUE	FALSE
cg10311318	chr13	26043578	26043579	ATP8A2	51761	97368	CGI-S-Shore	FALSE	TRUE	FALSE
cg11478100	chr13	103053409	103053410	FGF14	2259	713	CGI	FALSE	TRUE	FALSE
cg12280692	chr13	113107959	113107960	SPACA7	122258	77307	CGI	FALSE	FALSE	TRUE
cg14924160	chr13	41496235	41496236	TPTE2P5	100616668	-324	CGI-S-Shore	TRUE	FALSE	FALSE
cg16792202	chr13	37574747	37574748	EXOSC8	11340	68	CGI	TRUE	FALSE	FALSE
cg17070064	chr13	112554681	112554682	SOX1	6656	-167230	CGI-S-Shore	FALSE	FALSE	TRUE
cg19919720	chr13	107687165	107687166	ARGLU1	55082	-466650	CGI	FALSE	FALSE	TRUE
cg21448145	chr13	103054752	103054753	FGF14	2259	-627	CGI-S-Shore	TRUE	FALSE	FALSE
cg21566513	chr13	24913084	24913085	C1QTNF9	338872	29367	CGI	FALSE	FALSE	TRUE
cg22753668	chr13	29013387	29013388	FLT1	2321	55876	Non-CGI	FALSE	TRUE	FALSE
cg24342013	chr13	48891544	48891545	RB1	5925	13660	CGI	FALSE	TRUE	FALSE
cg25065097	chr13	50160350	50160351	RCBTB1	55213	-630	CGI-S-Shore	TRUE	FALSE	FALSE
cg25853960	chr13	34650841	34650842	RFC3	5983	258634	Non-CGI	FALSE	FALSE	TRUE
cg26350803	chr13	113654392	113654393	MCF2L-AS1	100289410	-31439	CGI	TRUE	TRUE	FALSE
cg05038469	chr14	104686119	104686120	KIF26A	26153	81058	CGI-N-Shore	FALSE	FALSE	TRUE
cg05182418	chr14	104176381	104176382	XRCC3	7517	5440	CGI-S-Shelf	FALSE	TRUE	FALSE
cg05293490	chr14	95156546	95156547	SERPINA13P	388007	49483	CGI-S-Shore	FALSE	FALSE	TRUE
cg07960360	chr14	96128403	96128404	TCL1B	9623	-1188	Non-CGI	TRUE	TRUE	FALSE
cg08185576	chr14	96721454	96721455	BDKRB1	623	-1091	Non-CGI	TRUE	FALSE	FALSE
cg09010499	chr14	96680781	96680782	BDKRB2	624	9645	Non-CGI	FALSE	TRUE	FALSE
cg09399850	chr14	103998970	103998971	TRMT61A	115708	3460	CGI-N-Shore	TRUE	TRUE	FALSE
cg09841842	chr14	51974848	51974849	FRMD6	122786	18992	Non-CGI	FALSE	TRUE	FALSE
cg12882762	chr14	53196687	53196688	STYX	6815	-194	CGI	TRUE	FALSE	FALSE
cg13665174	chr14	69865472	69865473	SLC39A9	55334	375	CGI	TRUE	TRUE	FALSE
cg14178821	chr14	74944633	74944634	MIR4709	100616211	2272	Non-CGI	FALSE	FALSE	TRUE
cg14234694	chr14	72199621	72199622	RGS6	9628	-199194	Non-CGI	FALSE	TRUE	FALSE
cg16278496	chr14	98444476	98444477	C14orf64	388011	-14	Non-CGI	TRUE	FALSE	FALSE
cg16491185	chr14	106938509	106938510	LINC00221	338005	53	CGI	TRUE	TRUE	FALSE
cg18181923	chr14	99682269	99682270	BCL11B	64919	55551	CGI	FALSE	TRUE	FALSE
cg19571360	chr14	106307030	106307031	KIAA0125	9834	-48948	Non-CGI	FALSE	TRUE	FALSE
cg22797490	chr14	102504851	102504852	DYNC1H1	1778	73985	CGI	FALSE	TRUE	FALSE
cg22837406	chr14	76618409	76618410	GPATCH2L	55668	149	CGI	TRUE	TRUE	FALSE
cg23112821	chr14	100658902	100658903	DEGS2	123099	-32889	CGI	FALSE	FALSE	TRUE
cg23335124	chr14	74960385	74960386	ISCA2	122961	-63	CGI	TRUE	FALSE	FALSE
cg23541019	chr14	105451561	105451562	C14orf79	122616	-1053	CGI	TRUE	FALSE	FALSE
cg24740320	chr14	44418808	44418809	FSCB	84075	557689	Non-CGI	FALSE	FALSE	TRUE
cg26338030	chr14	105932930	105932931	CRIP2	1397	-6411	CGI	FALSE	TRUE	FALSE
cg00120210	chr15	85259593	85259594	SEC11A	23478	79	CGI	TRUE	FALSE	FALSE
cg00202454	chr15	42371886	42371887	PLA2G4D	283748	14864	CGI	FALSE	TRUE	FALSE
cg01343151	chr15	78235484	78235485	LOC645752	645752	-16295	CGI-N-Shore	FALSE	FALSE	TRUE
cg01361068	chr15	100889683	100889684	FLJ42289	388182	1238	CGI	TRUE	TRUE	FALSE
cg02019051	chr15	49913146	49913147	FAM227B	196951	-27	CGI	TRUE	FALSE	FALSE
cg02119938	chr15	78505051	78505052	ACSBG1	23205	21996	Non-CGI	FALSE	TRUE	FALSE
cg02852238	chr15	42174934	42174935	SPTBN5	51332	11339	CGI-S-Shore	FALSE	TRUE	FALSE
cg03479535	chr15	100889701	100889702	FLJ42289	388182	1220	CGI	TRUE	TRUE	FALSE
cg03945322	chr15	72766609	72766610	ARIH1	25820	-56	CGI	TRUE	FALSE	FALSE
cg05642379	chr15	93351914	93351915	ASB9P1	728619	13199	CGI	FALSE	FALSE	TRUE
cg07774964	chr15	65133105	65133106	PLEKHO2	80301	-975	CGI-N-Shore	TRUE	FALSE	FALSE
cg09214398	chr15	78556534	78556535	DNAJA4	55466	46	CGI	TRUE	FALSE	FALSE
cg09553651	chr15	60411555	60411556	FOXB1	27023	115133	Non-CGI	FALSE	FALSE	TRUE
cg10403934	chr15	35280593	35280594	ZNF770	54989	-95	CGI	TRUE	FALSE	FALSE
cg10604258	chr15	93588851	93588852	RGMA	56963	43590	CGI-S-Shore	FALSE	TRUE	FALSE
cg10655492	chr15	94443812	94443813	MCTP2	55784	-330987	CGI	TRUE	FALSE	FALSE
cg10835172	chr15	77224357	77224358	RCN2	5955	394	CGI	FALSE	TRUE	FALSE
cg12020433	chr15	42566343	42566344	GANC	2595	486	CGI	TRUE	TRUE	FALSE
cg12307764	chr15	40861449	40861450	RPUSD2	27079	-80	CGI-N-Shore	TRUE	FALSE	FALSE
cg16480660	chr15	99791485	99791486	TTC23	64927	-56	CGI	TRUE	FALSE	FALSE
cg17272019	chr15	102094601	102094602	PCSK6	5046	-64413	CGI-N-Shore	FALSE	FALSE	TRUE
cg21245004	chr15	98965475	98965476	FAM169B	283777	92134	CGI	FALSE	FALSE	TRUE
cg21385822	chr15	75661000	75661001	MAN2C1	4123	-58	CGI	TRUE	FALSE	FALSE
cg22452230	chr15	69754698	69754699	LOC145837	145837	-746	CGI	TRUE	FALSE	FALSE
cg22546696	chr15	41952645	41952646	MIR626	693211	-31136	CGI	TRUE	TRUE	FALSE
cg22999786	chr15	34628769	34628770	SLC12A6	9990	1494	CGI	TRUE	TRUE	FALSE
cg23687437	chr15	64125745	64125746	HERC1	8925	400	CGI	FALSE	TRUE	FALSE
cg24495257	chr15	75074433	75074434	CSK	1445	7	CGI	TRUE	FALSE	FALSE
cg25887394	chr15	40781960	40781961	CHST14	113189	18799	CGI	FALSE	FALSE	TRUE
cg26582729	chr15	26234046	26234047	LOC100128714	100128714	86538	CGI-N-Shore	FALSE	TRUE	FALSE
cg26789400	chr15	43663318	43663319	TUBGCP4	27229	4	CGI	TRUE	FALSE	FALSE
cg27406983	chr15	22923823	22923824	CYFIP1	23191	31138	CGI-S-Shore	FALSE	TRUE	FALSE
cg00044050	chr16	11439710	11439711	PRM1	5619	-64517	CGI	FALSE	TRUE	FALSE
cg00454961	chr16	929020	929021	PRR25	388199	73576	CGI	FALSE	TRUE	FALSE
cg00805320	chr16	68057225	68057226	DUS2L	54920	20	CGI	TRUE	FALSE	FALSE
cg01007768	chr16	66586407	66586408	CKLF-CMTM1	100529251	-57	CGI	TRUE	FALSE	FALSE
cg01025599	chr16	4303589	4303590	LOC100507501	100507501	199	CGI-N-Shore	FALSE	TRUE	FALSE
cg01309213	chr16	331821	331822	ARHGDIG	398	1214	CGI-S-Shore	TRUE	TRUE	FALSE
cg01336629	chr16	883622	883623	PRR25	388199	28178	CGI-S-Shore	FALSE	FALSE	TRUE
cg01347548	chr16	71496005	71496006	ZNF23	7571	27210	CGI	TRUE	TRUE	FALSE
cg02804114	chr16	88763144	88763145	RNF166	115992	9683	CGI-S-Shore	FALSE	TRUE	FALSE
cg02848750	chr16	89668406	89668407	DPEP1	1800	-11308	CGI	FALSE	FALSE	TRUE
cg03228804	chr16	86589205	86589206	FLJ30679	146512	278	CGI	TRUE	FALSE	FALSE
cg03259564	chr16	1131805	1131806	SSTR5-AS1	146336	-3073	CGI-S-Shore	FALSE	FALSE	TRUE
cg03755748	chr16	87996816	87996817	BANP	54971	12577	CGI	FALSE	TRUE	FALSE
cg03908927	chr16	87211280	87211281	C16orf95	100506581	139744	Non-CGI	FALSE	TRUE	FALSE
cg04153495	chr16	25078095	25078096	LOC554206	554206	35032	CGI	TRUE	FALSE	FALSE
cg04194840	chr16	58545502	58545503	SETD6	79918	-3879	CGI	FALSE	TRUE	FALSE
cg04390096	chr16	81111008	81111009	C16orf46	123775	-135	CGI	TRUE	FALSE	FALSE
cg05012676	chr16	88564366	88564367	ZFPM1	161882	44351	CGI	FALSE	TRUE	FALSE
cg05350293	chr16	89119002	89119003	ACSF3	197322	-41213	CGI	TRUE	FALSE	FALSE
cg05485462	chr16	3062349	3062350	CLDN9	9080	-106	CGI-N-Shore	TRUE	FALSE	FALSE
cg05638439	chr16	711235	711236	RHOT2	89941	-6846	CGI	TRUE	TRUE	FALSE
cg05756745	chr16	87701853	87701854	JPH3	57338	66411	CGI	FALSE	TRUE	FALSE
cg05845592	chr16	28634766	28634767	SULT1A1	6817	139	CGI	TRUE	TRUE	FALSE
cg05862135	chr16	3074294	3074295	HCFC1R1	54985	-6	CGI	TRUE	TRUE	FALSE
cg05966235	chr16	28915196	28915197	RABEP2	79874	21334	CGI-S-Shelf	FALSE	TRUE	FALSE
cg06074534	chr16	85020055	85020056	ZDHHC7	55625	25084	CGI	FALSE	TRUE	FALSE
cg06140118	chr16	68056778	68056779	DUS2L	54920	-424	CGI	TRUE	FALSE	FALSE
cg06236737	chr16	89950219	89950220	TCF25	22980	10224	CGI	TRUE	TRUE	FALSE
cg06411434	chr16	712254	712255	RHOT2	89941	-5827	CGI	TRUE	TRUE	FALSE
cg06630425	chr16	818451	818452	MIR662	724032	-1730	CGI	TRUE	TRUE	FALSE
cg07130392	chr16	89588927	89588928	SPG7	6687	14121	CGI	FALSE	TRUE	FALSE
cg07304536	chr16	86987635	86987636	C16orf95	100506581	363389	CGI	FALSE	FALSE	TRUE
cg07310671	chr16	85253980	85253981	LINC00311	197196	-62582	CGI-N-Shore	FALSE	FALSE	TRUE
cg07447187	chr16	81110516	81110517	C16orf46	123775	354	CGI	FALSE	TRUE	FALSE
cg08013914	chr16	89764279	89764280	SPATA2L	124044	3840	CGI-S-Shore	FALSE	TRUE	FALSE
cg08296037	chr16	1584118	1584119	TMEM204	79652	5375	CGI	TRUE	TRUE	FALSE
cg08480854	chr16	1498490	1498491	CCDC154	645811	-3999	CGI	FALSE	TRUE	FALSE
cg08608240	chr16	1080808	1080809	SSTR5	6755	-41946	CGI-S-Shore	FALSE	FALSE	TRUE
cg09048665	chr16	704976	704977	WDR90	197335	5612	CGI	TRUE	TRUE	FALSE
cg09117114	chr16	67998030	67998031	SLC12A4	6560	5063	CGI	TRUE	TRUE	FALSE
cg09201499	chr16	88838113	88838114	PIEZO1	9780	13257	CGI-S-Shore	FALSE	TRUE	FALSE
cg09556515	chr16	85470485	85470486	LOC727710	727710	-133482	CGI	FALSE	FALSE	TRUE
cg09969487	chr16	49902325	49902326	ZNF423	23090	-41406	CGI	FALSE	FALSE	TRUE
cg10118998	chr16	2236938	2236939	CASKIN1	57524	9525	CGI	FALSE	TRUE	FALSE
cg10150962	chr16	86404379	86404380	LOC732275	732275	-25093	CGI-N-Shore	FALSE	FALSE	TRUE
cg10446007	chr16	68345126	68345127	PRMT7	54496	248	CGI	TRUE	TRUE	FALSE
cg10471544	chr16	1820375	1820376	NME3	4832	1333	CGI	FALSE	TRUE	FALSE
cg16664996	chr16	88385249	88385250	ZNF469	84627	-108628	CGI	FALSE	FALSE	TRUE
cg16709904	chr16	86379417	86379418	LOC732275	732275	-131	CGI-S-Shelf	TRUE	FALSE	FALSE
cg26512406	chr16	28223152	28223153	XPO6	23214	36	CGI	TRUE	FALSE	FALSE
cg27092191	chr16	31884699	31884700	ZNF267	10308	-378	CGI	TRUE	FALSE	FALSE
cg27136719	chr16	1147829	1147830	C1QTNF8	390664	-1584	CGI-S-Shore	TRUE	FALSE	FALSE
cg27201775	chr16	85674895	85674896	GSE1	23199	29865	CGI	FALSE	TRUE	FALSE
cg27464846	chr16	88268600	88268601	ZNF469	84627	-225277	CGI	FALSE	FALSE	TRUE
cg27616039	chr16	1207075	1207076	CACNA1H	8912	3833	CGI	FALSE	TRUE	FALSE
cg00134843	chr17	76374495	76374496	PGS1	9489	-238	CGI	TRUE	FALSE	FALSE
cg00660096	chr17	81023323	81023324	B3GNTL1	146712	-13636	CGI	FALSE	FALSE	TRUE
cg00685319	chr17	6560967	6560968	MIR4520A	100616401	-2138	CGI-S-Shore	FALSE	FALSE	TRUE
cg00686451	chr17	43361331	43361332	SPATA32	124783	-21851	Non-CGI	FALSE	TRUE	FALSE
cg01281078	chr17	37886864	37886865	MIEN1	84299	-75	CGI	TRUE	FALSE	FALSE
cg02352203	chr17	78518437	78518438	RPTOR	57521	-186	CGI-N-Shore	TRUE	FALSE	FALSE
cg02517519	chr17	34093631	34093632	C17orf50	146853	5714	CGI-S-Shore	FALSE	TRUE	FALSE
cg02952816	chr17	80372912	80372913	HEXDC	284004	-3338	CGI	FALSE	TRUE	FALSE
cg04014306	chr17	79194635	79194636	AZI1	22994	2114	CGI-N-Shore	FALSE	TRUE	FALSE
cg04014328	chr17	46653615	46653616	HOXB4	3214	2126	CGI-S-Shore	TRUE	TRUE	FALSE
cg04277193	chr17	41438351	41438352	LOC100130581	100130581	27913	CGI	FALSE	FALSE	TRUE
cg04771550	chr17	8079827	8079828	TMEM107	84314	-112	CGI	TRUE	FALSE	FALSE
cg05100739	chr17	72733163	72733164	MIR3615	100500847	-11587	CGI	TRUE	TRUE	FALSE
cg05373251	chr17	79451985	79451986	ACTG1	71	27905	CGI-S-Shore	FALSE	FALSE	TRUE
cg06582663	chr17	79043264	79043265	BAIAP2	10458	34316	CGI	FALSE	TRUE	FALSE
cg06703366	chr17	62050268	62050269	SCN4A	6329	8	Non-CGI	TRUE	FALSE	FALSE
cg06720017	chr17	76967629	76967630	LGALS3BP	3959	8430	CGI-N-Shore	FALSE	TRUE	FALSE
cg06800040	chr17	42427647	42427648	GRN	2896	5155	CGI-N-Shelf	TRUE	TRUE	FALSE
cg07146073	chr17	29852668	29852669	MIR4724	100616248	-9231	CGI-N-Shelf	FALSE	TRUE	FALSE
cg07208908	chr17	79818639	79818640	P4HB	5034	-94	CGI	TRUE	FALSE	FALSE
cg07248223	chr17	38717275	38717276	CCR7	1236	4459	Non-CGI	FALSE	TRUE	FALSE
cg07428200	chr17	78046742	78046743	GAA	2548	-28611	Non-CGI	FALSE	TRUE	FALSE
cg07899956	chr17	74261249	74261250	UBALD2	283991	-35	CGI	TRUE	FALSE	FALSE
cg08154101	chr17	9130094	9130095	NTN1	9423	205234	CGI	FALSE	TRUE	FALSE
cg08378505	chr17	73127297	73127298	NT5C	30833	591	CGI	FALSE	TRUE	FALSE
cg09780231	chr17	873452	873453	NXN	64359	9544	CGI	FALSE	TRUE	FALSE
cg10165801	chr17	46651186	46651187	HOXB4	3214	4555	CGI-N-Shore	FALSE	TRUE	FALSE
cg10752190	chr17	9604414	9604415	USP43	124739	55833	Non-CGI	TRUE	TRUE	FALSE
cg10866062	chr17	72358370	72358371	BTBD17	388419	-411	CGI-S-Shelf	TRUE	FALSE	FALSE
cg10950924	chr17	47092072	47092073	IGF2BP1	10642	17297	CGI	FALSE	TRUE	FALSE
cg10959726	chr17	6917614	6917615	RNASEK-C17orf49	100529209	1877	CGI	TRUE	TRUE	FALSE
cg12810096	chr17	32484112	32484113	ASIC2	40	-286	CGI	TRUE	FALSE	FALSE
cg12848405	chr17	78156317	78156318	CARD14	79092	12483	CGI	TRUE	TRUE	FALSE
cg13067033	chr17	8079864	8079865	TMEM107	84314	-149	CGI	TRUE	FALSE	FALSE
cg13120258	chr17	767380	767381	GLOD4	51031	-81808	CGI	TRUE	TRUE	FALSE
cg13163896	chr17	75414571	75414572	MIR4316	100422851	-21434	Non-CGI	FALSE	TRUE	FALSE
cg13375589	chr17	4487125	4487126	SMTNL2	342527	-149	CGI-N-Shore	TRUE	FALSE	FALSE
cg13562841	chr17	76121872	76121873	TMC8	147138	-4985	CGI-S-Shore	TRUE	TRUE	FALSE
cg14103143	chr17	46969973	46969974	ATP5G1	516	-173	CGI	TRUE	FALSE	FALSE
cg14136893	chr17	872770	872771	NXN	64359	10226	CGI	FALSE	TRUE	FALSE
cg14170999	chr17	79380515	79380516	MIR4740	100616294	-5936	CGI	FALSE	TRUE	FALSE
cg14193007	chr17	77953016	77953017	TBC1D16	125058	56629	CGI	FALSE	TRUE	FALSE
cg14652587	chr17	75692571	75692572	LOC100507351	100507351	149547	CGI	FALSE	FALSE	TRUE
cg14952312	chr17	72350710	72350711	BTBD17	388419	7246	CGI-S-Shore	FALSE	TRUE	FALSE
cg16263848	chr17	9018806	9018807	NTN1	9423	93946	CGI-N-Shore	FALSE	TRUE	FALSE
cg17094688	chr17	17380209	17380210	MED9	55090	-89	CGI-N-Shore	TRUE	FALSE	FALSE
cg17195329	chr17	27047427	27047428	SNORD42B	26808	-139	CGI	TRUE	TRUE	FALSE
cg17427926	chr17	76227386	76227387	TMEM235	283999	-3	CGI-N-Shore	TRUE	FALSE	FALSE
cg17459387	chr17	79134666	79134667	AATK-AS1	388428	-4639	CGI	FALSE	TRUE	FALSE
cg17479501	chr17	80806191	80806192	ZNF750	79755	-8259	CGI	FALSE	TRUE	FALSE
cg17730474	chr17	37729928	37729929	NEUROD2	4761	34245	CGI	FALSE	FALSE	TRUE
cg17793286	chr17	18011879	18011880	MYO15A	51168	-139	Non-CGI	TRUE	FALSE	FALSE
cg19669385	chr17	800263	800264	NXN	64359	82733	CGI	TRUE	TRUE	FALSE
cg20197989	chr17	260058	260059	C17orf97	400566	-58	CGI	TRUE	FALSE	FALSE
cg20889395	chr17	48912556	48912557	WFIKKN2	124857	544	CGI	TRUE	TRUE	FALSE
cg21373192	chr17	48649272	48649273	CACNA1G-AS1	253962	-9802	CGI-N-Shelf	FALSE	TRUE	FALSE
cg21506159	chr17	41466287	41466288	LOC100130581	100130581	-20	CGI	TRUE	FALSE	FALSE
cg21879029	chr17	78935175	78935176	CHMP6	79643	-30464	CGI	FALSE	TRUE	FALSE
cg23668057	chr17	76164111	76164112	SYNGR2	9144	-558	CGI-N-Shore	TRUE	FALSE	FALSE
cg23702945	chr17	62131694	62131695	ICAM2	3384	-33699	Non-CGI	FALSE	TRUE	FALSE
cg23838308	chr17	57785056	57785057	VMP1	81671	192	CGI	TRUE	FALSE	FALSE
cg23887396	chr17	26699551	26699552	VTN	7448	-2177	CGI	FALSE	TRUE	FALSE
cg23900422	chr17	77679767	77679768	MIR4739	100616170	1289	CGI-N-Shore	TRUE	FALSE	FALSE
cg24079672	chr17	73739840	73739841	GALK1	2584	21438	CGI-S-Shore	FALSE	TRUE	FALSE
cg24130568	chr17	80845107	80845108	ZNF750	79755	-47175	CGI	FALSE	TRUE	FALSE
cg24768974	chr17	47337641	47337642	FLJ40194	124871	12035	CGI	FALSE	FALSE	TRUE
cg25217842	chr17	76950852	76950853	LGALS3BP	3959	25207	Non-CGI	FALSE	FALSE	TRUE
cg26656751	chr17	43910226	43910227	SPPL2C	162540	-12028	Non-CGI	FALSE	TRUE	FALSE
cg27052709	chr17	76495017	76495018	DNAH17	8632	78457	CGI-N-Shelf	FALSE	TRUE	FALSE
cg27177415	chr17	79412681	79412682	MIR3186	100422944	5531	CGI	FALSE	TRUE	FALSE
cg00647528	chr18	32957127	32957128	ZNF396	252884	172	CGI	FALSE	TRUE	FALSE
cg05995555	chr18	18512421	18512422	ROCK1	6093	179389	Non-CGI	FALSE	FALSE	TRUE
cg06905387	chr18	44259787	44259788	LOXHD1	125336	-22790	CGI-N-Shore	FALSE	TRUE	FALSE
cg15644404	chr18	77186268	77186269	NFATC1	4772	30495	CGI-S-Shore	FALSE	TRUE	FALSE
cg15656901	chr18	67873348	67873349	RTTN	25914	-385	CGI	TRUE	FALSE	FALSE
cg18092363	chr18	77202678	77202679	NFATC1	4772	46905	CGI	FALSE	TRUE	FALSE
cg20711496	chr18	55289815	55289816	NARS	4677	-637	CGI-S-Shore	TRUE	FALSE	FALSE
cg23983671	chr18	76755310	76755311	SALL3	27164	15034	CGI	FALSE	TRUE	FALSE
cg24212262	chr18	76829335	76829336	ATP9B	374868	-60	CGI	TRUE	FALSE	FALSE
cg26444623	chr18	47792921	47792922	CCDC11	220136	-55	CGI	TRUE	FALSE	FALSE
cg27181574	chr18	56884354	56884355	GRP	2922	-3044	CGI-N-Shelf	FALSE	FALSE	TRUE
cg00598747	chr19	41870030	41870031	B9D2	80776	46	CGI	TRUE	TRUE	FALSE
cg02432888	chr19	11094931	11094932	SMARCA4	6597	23332	CGI-N-Shore	TRUE	TRUE	FALSE
cg03439990	chr19	47164505	47164506	DACT3	147906	-109	CGI	TRUE	TRUE	FALSE
cg03650154	chr19	52800757	52800758	ZNF480	147657	330	CGI	FALSE	TRUE	FALSE
cg04264658	chr19	50145292	50145293	SCAF1	58506	-88	CGI	TRUE	FALSE	FALSE
cg06711307	chr19	10362455	10362456	MRPL4	51073	-183	CGI-N-Shore	TRUE	FALSE	FALSE
cg06729532	chr19	14376770	14376771	LPHN1	22859	-59772	CGI	FALSE	FALSE	TRUE
cg07532993	chr19	7553986	7553987	PEX11G	92960	298	CGI	TRUE	TRUE	FALSE
cg07664760	chr19	49472824	49472825	FTL	2512	4257	CGI	FALSE	TRUE	FALSE
cg07719100	chr19	45909713	45909714	PPP1R13L	10848	-105	CGI	TRUE	FALSE	FALSE
cg08056716	chr19	35397106	35397107	ZNF30	90075	-20699	CGI-S-Shore	TRUE	FALSE	FALSE
cg09264330	chr19	19643172	19643173	CILP2	148113	-5900	CGI	FALSE	TRUE	FALSE
cg09301200	chr19	1357017	1357018	MUM1	84939	2040	CGI-S-Shore	TRUE	TRUE	FALSE
cg09760057	chr19	1528418	1528419	PLK5	126520	4344	CGI-S-Shore	FALSE	TRUE	FALSE
cg11666446	chr19	3122657	3122658	GNA15	2769	-13532	CGI	TRUE	FALSE	FALSE
cg11856182	chr19	35264148	35264149	ZNF599	148103	-13	CGI	TRUE	FALSE	FALSE
cg11883009	chr19	13198960	13198961	LYL1	4066	15012	CGI	FALSE	TRUE	FALSE
cg11976052	chr19	51411839	51411840	KLK4	9622	2153	CGI	FALSE	TRUE	FALSE
cg12956079	chr19	10764738	10764739	ILF3-AS1	147727	-189	CGI	TRUE	FALSE	FALSE
cg14206172	chr19	39466757	39466758	FBXO17	115290	-376	CGI	TRUE	FALSE	FALSE
cg14889329	chr19	47164747	47164748	DACT3	147906	-351	CGI	TRUE	TRUE	FALSE
cg15128510	chr19	57741988	57741989	AURKC	6795	-387	CGI	TRUE	FALSE	FALSE
cg15469014	chr19	11032172	11032173	YIPF2	78992	7183	CGI	FALSE	TRUE	FALSE
cg15537455	chr19	56739749	56739750	ZSCAN5B	342933	-35327	CGI	TRUE	TRUE	FALSE
cg16875629	chr19	36389575	36389576	NFKBID	84807	1975	CGI-N-Shore	FALSE	TRUE	FALSE
cg17739046	chr19	19977659	19977660	ZNF253	56242	944	CGI-S-Shore	FALSE	TRUE	FALSE
cg17850984	chr19	4246870	4246871	CCDC94	55702	-239	CGI-N-Shore	TRUE	FALSE	FALSE
cg18075691	chr19	58566643	58566644	ZNF135	7694	-3962	CGI	FALSE	FALSE	TRUE
cg19423625	chr19	991886	991887	WDR18	57418	7557	CGI	FALSE	TRUE	FALSE
cg19912337	chr19	51529628	51529629	KLK11	11012	1660	Non-CGI	FALSE	TRUE	FALSE
cg21208157	chr19	49120043	49120044	RPL18	6141	2388	CGI-S-Shelf	FALSE	TRUE	FALSE
cg22483095	chr19	1112679	1112680	GPX4	2879	8742	CGI	FALSE	TRUE	FALSE
cg22598669	chr19	51186978	51186979	SHANK1	50944	33215	CGI	FALSE	TRUE	FALSE
cg22672282	chr19	44222974	44222975	IRGC	56269	2759	CGI	TRUE	TRUE	FALSE
cg23071186	chr19	6669849	6669850	TNFSF14	8740	748	Non-CGI	FALSE	TRUE	FALSE
cg23270359	chr19	13875381	13875382	MRI1	84245	43	CGI	TRUE	FALSE	FALSE
cg23286295	chr19	48674931	48674932	LIG1	3978	-1370	CGI	TRUE	TRUE	FALSE
cg23527409	chr19	44956065	44956066	ZNF229	7772	-3298	CGI-S-Shore	FALSE	FALSE	TRUE
cg24002183	chr19	15568574	15568575	RASAL3	64926	6806	CGI	FALSE	TRUE	FALSE
cg24039816	chr19	51220098	51220099	SHANK1	50944	95	CGI	TRUE	FALSE	FALSE
cg24310183	chr19	50145283	50145284	SCAF1	58506	-97	CGI	TRUE	FALSE	FALSE
cg26751868	chr19	4126461	4126462	MAP2K2	5605	-2334	CGI-S-Shelf	FALSE	FALSE	TRUE
cg27128734	chr19	51411940	51411941	KLK4	9622	2052	CGI	FALSE	TRUE	FALSE
cg27183173	chr19	728040	728041	PALM	5064	19086	CGI	FALSE	TRUE	FALSE
cg27277620	chr19	1529763	1529764	PLK5	126520	5689	CGI-S-Shelf	FALSE	TRUE	FALSE
cg01154966	chr20	33680989	33680990	TRPC4AP	26133	-370	CGI	TRUE	FALSE	FALSE
cg03212862	chr20	47662828	47662829	CSE1L	1434	-8	CGI	TRUE	FALSE	FALSE
cg04772948	chr20	22401407	22401408	LOC284788	284788	-125	Non-CGI	TRUE	FALSE	FALSE
cg05847960	chr20	10152774	10152775	SNAP25	6616	-46701	CGI-N-Shore	FALSE	TRUE	FALSE
cg05928023	chr20	3451622	3451623	ATRN	8455	-41	CGI	TRUE	FALSE	FALSE
cg05974269	chr20	57485819	57485820	GNAS-AS1	149775	-59860	CGI	FALSE	TRUE	FALSE
cg06147822	chr20	57466905	57466906	GNAS-AS1	149775	-40946	CGI-S-Shore	TRUE	TRUE	FALSE
cg07265716	chr20	34330304	34330305	RBM39	9584	-45	CGI	TRUE	FALSE	FALSE
cg07329296	chr20	60882647	60882648	ADRM1	11047	4619	CGI	FALSE	TRUE	FALSE
cg11523191	chr20	62187126	62187127	C20orf195	79025	2752	CGI-S-Shore	TRUE	TRUE	FALSE
cg11547334	chr20	34287314	34287315	NFS1	9054	-26	CGI	TRUE	FALSE	FALSE
cg12043732	chr20	61284223	61284224	SLCO4A1	28231	10425	CGI	FALSE	TRUE	FALSE
cg12209214	chr20	2083359	2083360	STK35	140901	830	CGI	TRUE	TRUE	FALSE
cg12372745	chr20	62187666	62187667	C20orf195	79025	3292	CGI	TRUE	TRUE	FALSE
cg12632411	chr20	17595355	17595356	DSTN	11034	44755	CGI-S-Shore	FALSE	TRUE	FALSE
cg12904078	chr20	61719188	61719189	HAR1A	768096	-13454	CGI	FALSE	FALSE	TRUE
cg21251385	chr20	52277050	52277051	ZNF217	7764	-66248	CGI-S-Shore	FALSE	FALSE	TRUE
cg23156475	chr20	18269111	18269112	ZNF133	7692	-8	CGI	TRUE	FALSE	FALSE
cg23601030	chr20	52276760	52276761	ZNF217	7764	-65958	CGI-N-Shore	FALSE	FALSE	TRUE
cg24688309	chr20	60456498	60456499	MIR1257	100302168	72218	CGI	FALSE	TRUE	FALSE
cg26310456	chr20	34129751	34129752	ERGIC3	51614	-25	CGI	TRUE	FALSE	FALSE
cg07279557	chr21	46875417	46875418	COL18A1-AS1	378832	-30431	CGI-N-Shore	TRUE	TRUE	FALSE
cg14903689	chr21	46875218	46875219	COL18A1-AS1	378832	-30232	CGI-N-Shore	TRUE	TRUE	FALSE
cg15157241	chr21	44396204	44396205	PKNOX1	5316	1560	CGI-S-Shore	FALSE	TRUE	FALSE
cg15407086	chr21	27543045	27543046	APP	351	399	CGI	TRUE	TRUE	FALSE
cg18558420	chr21	45734417	45734418	PFKL	5211	14491	CGI-S-Shore	FALSE	TRUE	FALSE
cg21459460	chr21	40758346	40758347	WRB	7485	6132	CGI-S-Shore	TRUE	TRUE	FALSE
cg27263741	chr21	43099365	43099366	LINC00111	54090	-95	CGI-N-Shelf	TRUE	FALSE	FALSE
cg01207176	chr22	39887895	39887896	SMCR7L	54471	-8208	CGI-S-Shelf	TRUE	TRUE	FALSE
cg01553653	chr22	37412173	37412174	TST	7263	3316	CGI-N-Shelf	FALSE	TRUE	FALSE
cg02473781	chr22	22007095	22007096	MIR301B	100126318	-173	CGI-S-Shore	TRUE	FALSE	FALSE
cg03070533	chr22	35653394	35653395	HMGXB4	10042	-49	CGI	TRUE	FALSE	FALSE
cg04392554	chr22	46685472	46685473	CN5H6.4	150384	7083	CGI	FALSE	TRUE	FALSE
cg04493000	chr22	48895658	48895659	FAM19A5	25817	10369	CGI-S-Shore	FALSE	TRUE	FALSE
cg05945275	chr22	17489130	17489131	GAB4	128954	-17	CGI	TRUE	FALSE	FALSE
cg07264792	chr22	38054590	38054591	PDXP	57026	-145	CGI	TRUE	TRUE	FALSE
cg19864539	chr22	25747688	25747689	LRP5L	91355	29854	CGI-S-Shore	FALSE	TRUE	FALSE
cg21029504	chr22	50028390	50028391	C22orf34	348645	22798	CGI-S-Shore	FALSE	TRUE	FALSE
cg21694044	chr22	41215540	41215541	SLC25A17	10478	-147	CGI	TRUE	FALSE	FALSE
cg22471075	chr22	49765229	49765230	C22orf34	348645	285959	CGI	FALSE	FALSE	TRUE
cg23069551	chr22	39102838	39102839	GTPBP1	9567	1030	CGI	FALSE	TRUE	FALSE
cg24489344	chr22	46457998	46457999	C22orf26	55267	-7973	CGI	FALSE	TRUE	FALSE
cg27428418	chr22	50167366	50167367	LOC90834	90834	6590	CGI-S-Shore	FALSE	TRUE	FALSE
cg00003345	chr1	10816499	10816500	CASZ1	54897	40206	Non-CGI	FALSE	TRUE	FALSE
cg00023726	chr1	2839935	2839936	ACTRT2	140625	-98109	CGI	FALSE	FALSE	TRUE
cg00058296	chr1	237947435	237947436	LOC100130331	100130331	-78038	CGI	FALSE	TRUE	FALSE
cg00072675	chr1	56942628	56942629	PPAP2B	8613	102627	CGI-N-Shore	FALSE	FALSE	TRUE
cg00095326	chr1	228940949	228940950	DUSP5P1	574029	160554	Non-CGI	FALSE	FALSE	TRUE
cg00108716	chr1	228602400	228602401	TRIM17	51127	2181	CGI-N-Shore	FALSE	TRUE	FALSE
cg00160262	chr1	158533225	158533226	OR6P1	128366	167	Non-CGI	TRUE	FALSE	FALSE
cg00246451	chr1	155949012	155949013	ARHGEF2	9181	10850	CGI-S-Shore	TRUE	TRUE	FALSE
cg00298977	chr1	153175842	153175843	LELP1	149018	-75	Non-CGI	TRUE	FALSE	FALSE
cg00310044	chr1	45826423	45826424	MUTYH	4595	-20280	Non-CGI	FALSE	TRUE	FALSE
cg00318631	chr1	247803166	247803167	OR13G1	441933	33175	CGI	FALSE	FALSE	TRUE
cg00500989	chr1	156253073	156253074	TMEM79	84283	368	CGI-S-Shore	TRUE	TRUE	FALSE
cg00526629	chr1	187378159	187378160	PLA2G4A	5321	580126	Non-CGI	FALSE	FALSE	TRUE
cg00533084	chr1	156698170	156698171	ISG20L2	81875	39	CGI	TRUE	FALSE	FALSE
cg00541479	chr1	162468226	162468227	UHMK1	127933	1261	CGI	FALSE	TRUE	FALSE
cg00575003	chr1	217261949	217261950	ESRRG	2104	49146	CGI-N-Shore	FALSE	TRUE	FALSE
cg00609097	chr1	45956974	45956975	TESK2	10420	-133	CGI	TRUE	FALSE	FALSE
cg00656728	chr1	42618506	42618507	GUCA2B	2981	-584	Non-CGI	TRUE	FALSE	FALSE
cg00668034	chr1	28098848	28098849	STX12	23673	-844	CGI-N-Shore	TRUE	FALSE	FALSE
cg00790672	chr1	3324671	3324672	ARHGEF16	27237	-46474	CGI-N-Shore	FALSE	TRUE	FALSE
cg00923259	chr1	147374938	147374939	GJA8	2703	-6	Non-CGI	TRUE	FALSE	FALSE
cg00945108	chr1	12806027	12806028	C1orf158	93190	-134	Non-CGI	TRUE	FALSE	FALSE
cg00983803	chr1	48575902	48575903	SKINTL	391037	72196	Non-CGI	FALSE	TRUE	FALSE
cg01421140	chr1	57470853	57470854	C8B	732	-39164	Non-CGI	FALSE	TRUE	FALSE
cg01520321	chr1	223254215	223254216	TLR5	7100	62407	CGI-N-Shore	FALSE	FALSE	TRUE
cg01551176	chr1	28844397	28844398	RCC1	1104	11941	CGI-N-Shore	TRUE	TRUE	FALSE
cg01713950	chr1	17766995	17766996	RCC2	55920	-744	CGI-S-Shore	TRUE	FALSE	FALSE
cg01796781	chr1	38231768	38231769	EPHA10	284656	-943	CGI	TRUE	FALSE	FALSE
cg01828530	chr1	36105569	36105570	PSMB2	5690	1874	CGI-N-Shore	FALSE	TRUE	FALSE
cg01910639	chr1	153507779	153507780	S100A6	6277	936	CGI-S-Shore	FALSE	TRUE	FALSE
cg01968657	chr1	237207256	237207257	RYR2	6262	1553	CGI-S-Shore	FALSE	TRUE	FALSE
cg01970336	chr1	51986254	51986255	EPS15	2060	-1258	CGI-S-Shore	TRUE	FALSE	FALSE
cg02011124	chr1	5770367	5770368	MIR4417	100616489	146235	CGI-N-Shore	FALSE	FALSE	TRUE
cg02030524	chr1	51813816	51813817	TTC39A	22996	-3030	CGI-S-Shelf	FALSE	FALSE	TRUE
cg02057755	chr1	48998823	48998824	SPATA6	54558	-60946	Non-CGI	FALSE	TRUE	FALSE
cg02071276	chr1	224303989	224303990	FBXO28	23219	2197	CGI-S-Shore	FALSE	TRUE	FALSE
cg02104952	chr1	201481480	201481481	CSRP1	1465	-5092	Non-CGI	FALSE	FALSE	TRUE
cg02214783	chr1	3688257	3688258	SMIM1	388588	-1093	CGI-N-Shore	TRUE	FALSE	FALSE
cg02341480	chr1	235267474	235267475	SNORA14B	677802	23776	CGI-N-Shore	FALSE	FALSE	TRUE
cg02454560	chr1	28973988	28973989	RNU11	26824	-1122	CGI-N-Shore	TRUE	FALSE	FALSE
cg02493217	chr1	42806405	42806406	FOXJ3	22887	-4856	Non-CGI	FALSE	FALSE	TRUE
cg02570888	chr1	225864873	225864874	ENAH	55740	-24027	CGI-N-Shore	FALSE	FALSE	TRUE
cg02574734	chr1	116369351	116369352	NHLH2	4808	14394	CGI-N-Shore	FALSE	FALSE	TRUE
cg02630175	chr1	5159533	5159534	AJAP1	55966	444427	Non-CGI	FALSE	FALSE	TRUE
cg02657611	chr1	45814632	45814633	MUTYH	4595	-8489	Non-CGI	FALSE	TRUE	FALSE
cg02737022	chr1	246761343	246761344	CNST	163882	31703	Non-CGI	FALSE	TRUE	FALSE
cg02854922	chr1	144930964	144930965	LOC653513	653513	109026	CGI-N-Shore	TRUE	TRUE	FALSE
cg02991727	chr1	47646024	47646025	PDZK1IP1	10158	9745	Non-CGI	FALSE	FALSE	TRUE
cg03116124	chr1	231293208	231293209	TRIM67	440730	-5464	CGI-N-Shelf	FALSE	FALSE	TRUE
cg03262773	chr1	46712613	46712614	RAD54L	8438	-752	CGI-N-Shore	TRUE	FALSE	FALSE
cg03292284	chr1	241804036	241804037	OPN3	23596	-334	CGI-S-Shore	TRUE	FALSE	FALSE
cg03312565	chr1	4577365	4577366	LOC284661	284661	105253	CGI	FALSE	FALSE	TRUE
cg03315346	chr1	19109544	19109545	TAS1R2	80834	76609	CGI-N-Shore	FALSE	FALSE	TRUE
cg03324654	chr1	38897076	38897077	LOC339442	339442	-216636	Non-CGI	FALSE	FALSE	TRUE
cg03337482	chr1	3282449	3282450	ARHGEF16	27237	-88696	CGI	FALSE	TRUE	FALSE
cg03352347	chr1	114471812	114471813	HIPK1	204851	-182	CGI	TRUE	FALSE	FALSE
cg03434029	chr1	45274048	45274049	BTBD19	149478	-104	CGI-S-Shore	TRUE	FALSE	FALSE
cg03585734	chr1	15598865	15598866	FHAD1	114827	25096	CGI	TRUE	TRUE	FALSE
cg03652564	chr1	164619765	164619766	PBX1	5087	91167	Non-CGI	FALSE	TRUE	FALSE
cg03655142	chr1	153950843	153950844	JTB	10899	-391	CGI-S-Shore	TRUE	FALSE	FALSE
cg03700669	chr1	28284100	28284101	XKR8	55113	-2402	CGI-N-Shore	FALSE	TRUE	FALSE
cg03724279	chr1	56636154	56636155	PPAP2B	8613	409101	Non-CGI	FALSE	FALSE	TRUE
cg03761216	chr1	51986130	51986131	EPS15	2060	-1134	CGI-S-Shore	TRUE	FALSE	FALSE
cg03830929	chr1	154165776	154165777	MIR190B	100126346	441	Non-CGI	TRUE	FALSE	FALSE
cg03975815	chr1	240270565	240270566	FMN2	56776	15379	Non-CGI	FALSE	TRUE	FALSE
cg04237618	chr1	115829610	115829611	NGF	4803	51245	CGI-S-Shore	TRUE	TRUE	FALSE
cg04361056	chr1	153949416	153949417	JTB	10899	1033	CGI-N-Shore	FALSE	TRUE	FALSE
cg04496899	chr1	70820341	70820342	ANKRD13C	81573	74	CGI	TRUE	FALSE	FALSE
cg04506109	chr1	12123934	12123935	TNFRSF8	943	499	CGI	FALSE	TRUE	FALSE
cg04508951	chr1	193456140	193456141	B3GALT2	8707	-300396	Non-CGI	FALSE	FALSE	TRUE
cg04548841	chr1	224545223	224545224	CNIH4	29097	627	CGI	FALSE	TRUE	FALSE
cg04563718	chr1	2565777	2565778	MMEL1	79258	-1295	CGI-S-Shelf	TRUE	FALSE	FALSE
cg04597831	chr1	45806086	45806087	MUTYH	4595	54	CGI	TRUE	TRUE	FALSE
cg04619882	chr1	109741037	109741038	SARS	6301	-15476	Non-CGI	FALSE	TRUE	FALSE
cg04621654	chr1	183774114	183774115	APOBEC4	403314	-151665	CGI-N-Shore	TRUE	TRUE	FALSE
cg04643444	chr1	31653173	31653174	NKAIN1	79570	59559	CGI-N-Shore	FALSE	TRUE	FALSE
cg04667458	chr1	24105319	24105320	PITHD1	57095	442	CGI-S-Shore	TRUE	TRUE	FALSE
cg04706087	chr1	15126781	15126782	KAZN	23254	201567	CGI-N-Shore	FALSE	TRUE	FALSE
cg04777348	chr1	92952897	92952898	GFI1	2672	-463	CGI-S-Shore	TRUE	FALSE	FALSE
cg04837847	chr1	178482132	178482133	TEX35	84066	-78	Non-CGI	TRUE	FALSE	FALSE
cg04885642	chr1	166000382	166000383	MIR3658	100500832	123223	Non-CGI	FALSE	FALSE	TRUE
cg04892651	chr1	111006966	111006967	CYMP	643160	-9410	Non-CGI	FALSE	FALSE	TRUE
cg04921646	chr1	2851502	2851503	ACTRT2	140625	-86542	CGI-S-Shore	FALSE	FALSE	TRUE
cg04924028	chr1	65535397	65535398	MIR101-1	406893	-11205	CGI-S-Shore	FALSE	FALSE	TRUE
cg04930693	chr1	8083186	8083187	ERRFI1	54206	3205	CGI-N-Shelf	FALSE	TRUE	FALSE
cg05272157	chr1	33003975	33003976	ZBTB8A	653121	73316	CGI-N-Shore	TRUE	TRUE	FALSE
cg05335876	chr1	173018989	173018990	TNFSF18	8995	1112	Non-CGI	FALSE	TRUE	FALSE
cg05346855	chr1	212460169	212460170	PPP2R5A	5525	1289	CGI-S-Shore	FALSE	TRUE	FALSE
cg05348973	chr1	110697298	110697299	SLC6A17	388662	4165	CGI-S-Shelf	FALSE	TRUE	FALSE
cg05392737	chr1	179784720	179784721	TOR1AIP2	163590	62219	CGI-S-Shore	FALSE	TRUE	FALSE
cg05397039	chr1	243419179	243419180	SDCCAG8	10806	-126	CGI	TRUE	FALSE	FALSE
cg05399330	chr1	55464530	55464531	BSND	7809	-85	CGI-S-Shore	TRUE	FALSE	FALSE
cg05415378	chr1	52344844	52344845	NRD1	4898	-234	CGI-S-Shore	TRUE	FALSE	FALSE
cg05598581	chr1	48179783	48179784	FOXD2	2306	278093	CGI-S-Shelf	FALSE	FALSE	TRUE
cg05721773	chr1	207083336	207083337	FAIM3	9214	12040	CGI-S-Shore	FALSE	TRUE	FALSE
cg05753486	chr1	13796840	13796841	LRRC38	126755	43400	Non-CGI	FALSE	FALSE	TRUE
cg05930166	chr1	222884917	222884918	BROX	148362	-987	CGI	TRUE	TRUE	FALSE
cg06116757	chr1	177131972	177131973	ASTN1	460	2050	CGI-N-Shore	FALSE	TRUE	FALSE
cg06118122	chr1	236695160	236695161	LGALS8-AS1	100287902	-7351	Non-CGI	FALSE	TRUE	FALSE
cg06157219	chr1	2063875	2063876	C1orf86	199990	75295	CGI	FALSE	TRUE	FALSE
cg06356708	chr1	17760589	17760590	RCC2	55920	5659	CGI-N-Shelf	FALSE	TRUE	FALSE
cg06372967	chr1	43351860	43351861	ZNF691	51058	39615	CGI-N-Shore	FALSE	TRUE	FALSE
cg06376214	chr1	26633439	26633440	CD52	1043	-10970	CGI-S-Shore	TRUE	TRUE	FALSE
cg06709072	chr1	111162296	111162297	KCNA2	3737	11798	CGI	FALSE	TRUE	FALSE
cg06792347	chr1	200271670	200271671	LINC00862	554279	71248	CGI	FALSE	FALSE	TRUE
cg06826039	chr1	204379650	204379651	PPP1R15B	84919	1292	CGI-N-Shore	TRUE	FALSE	FALSE
cg06828613	chr1	209859738	209859739	HSD11B1	3290	212	Non-CGI	FALSE	TRUE	FALSE
cg06853416	chr1	2778841	2778842	TTC34	100287898	-72610	CGI	FALSE	FALSE	TRUE
cg06872964	chr1	79085250	79085251	IFI44L	10964	-836	Non-CGI	TRUE	FALSE	FALSE
cg06878808	chr1	17575210	17575211	PADI3	51702	-381	Non-CGI	TRUE	FALSE	FALSE
cg06959142	chr1	91182731	91182732	BARHL2	343472	61	CGI	TRUE	FALSE	FALSE
cg06997008	chr1	159771711	159771712	FCRL6	343413	1409	Non-CGI	TRUE	TRUE	FALSE
cg07017454	chr1	92011979	92011980	CDC7	8317	45574	CGI	FALSE	FALSE	TRUE
cg07018435	chr1	246860007	246860008	SCCPDH	51097	-27369	CGI	FALSE	FALSE	TRUE
cg07154254	chr1	201979128	201979129	ELF3	1999	2054	Non-CGI	TRUE	FALSE	FALSE
cg07234388	chr1	156261841	156261842	C1orf85	112770	3606	CGI-S-Shore	FALSE	TRUE	FALSE
cg07236874	chr1	204463446	204463447	PIK3C2B	5287	404	CGI	FALSE	TRUE	FALSE
cg07244253	chr1	154298839	154298840	ATP8B2	57198	802	CGI-S-Shore	TRUE	TRUE	FALSE
cg07367302	chr1	19967428	19967429	NBL1	4681	-2293	CGI-N-Shelf	FALSE	TRUE	FALSE
cg07368443	chr1	45265337	45265338	PLK3	1263	-697	CGI-N-Shore	TRUE	FALSE	FALSE
cg07379550	chr1	227204743	227204744	ADCK3	56997	120153	Non-CGI	FALSE	TRUE	FALSE
cg07478944	chr1	196281916	196281917	MIR4735	100616363	269693	Non-CGI	FALSE	TRUE	FALSE
cg07570898	chr1	117280833	117280834	CD2	914	-16251	CGI-N-Shelf	FALSE	FALSE	TRUE
cg07589381	chr1	10764512	10764513	CASZ1	54897	92193	CGI	FALSE	TRUE	FALSE
cg07595554	chr1	17380588	17380589	SDHB	6390	75	CGI	TRUE	FALSE	FALSE
cg07639650	chr1	113051090	113051091	WNT2B	7482	41049	CGI	TRUE	TRUE	FALSE
cg07692939	chr1	79473783	79473784	ELTD1	64123	-1287	CGI-S-Shore	TRUE	FALSE	FALSE
cg07706540	chr1	247373924	247373925	MIR3916	100500849	-8561	CGI	FALSE	FALSE	TRUE
cg07780762	chr1	45193615	45193616	KIF2C	11004	-11873	CGI-S-Shelf	FALSE	FALSE	TRUE
cg07833951	chr1	234891473	234891474	LOC100506810	100506810	31683	Non-CGI	FALSE	FALSE	TRUE
cg08026631	chr1	151372335	151372336	PSMB4	5692	293	CGI	FALSE	TRUE	FALSE
cg08106961	chr1	37355452	37355453	GRIK3	2899	144390	Non-CGI	FALSE	TRUE	FALSE
cg08141553	chr1	230201582	230201583	GALNT2	2590	8045	CGI-N-Shore	TRUE	TRUE	FALSE
cg08163621	chr1	6685996	6685997	THAP3	90326	1070	CGI-S-Shore	FALSE	TRUE	FALSE
cg08246428	chr1	160160106	160160107	CASQ1	844	-177	Non-CGI	TRUE	FALSE	FALSE
cg08458711	chr1	55473553	55473554	BSND	7809	8935	Non-CGI	FALSE	TRUE	FALSE
cg08466179	chr1	47799146	47799147	CMPK1	51727	-321	CGI-N-Shore	TRUE	FALSE	FALSE
cg08530632	chr1	89037170	89037171	PKN2	5586	-112750	Non-CGI	FALSE	TRUE	FALSE
cg08535515	chr1	244816088	244816089	DESI2	51029	-262	CGI	TRUE	FALSE	FALSE
cg08655330	chr1	19132135	19132136	TAS1R2	80834	54018	Non-CGI	FALSE	FALSE	TRUE
cg08710757	chr1	22962506	22962507	C1QA	712	-610	Non-CGI	TRUE	FALSE	FALSE
cg08729059	chr1	26495874	26495875	ZNF593	51042	-512	CGI-N-Shore	TRUE	FALSE	FALSE
cg08737116	chr1	116563487	116563488	SLC22A15	55356	44367	Non-CGI	FALSE	TRUE	FALSE
cg08869722	chr1	76891398	76891399	ST6GALNAC3	256435	351008	Non-CGI	FALSE	TRUE	FALSE
cg08887114	chr1	185229087	185229088	IVNS1ABP	10625	57372	CGI-S-Shelf	FALSE	TRUE	FALSE
cg08893087	chr1	93416982	93416983	FAM69A	388650	10095	Non-CGI	FALSE	TRUE	FALSE
cg08895932	chr1	152778580	152778581	LCE1C	353133	525	Non-CGI	TRUE	TRUE	FALSE
cg08903425	chr1	181552984	181552985	CACNA1E	777	100297	Non-CGI	FALSE	TRUE	FALSE
cg08946995	chr1	229283674	229283675	RAB4A	5867	-123203	CGI	FALSE	FALSE	TRUE
cg09064148	chr1	159269203	159269204	FCER1A	2205	9696	Non-CGI	FALSE	TRUE	FALSE
cg09115440	chr1	233462575	233462576	KIAA1804	84451	-937	CGI-N-Shore	TRUE	FALSE	FALSE
cg09132577	chr1	112020858	112020859	C1orf162	128346	4253	Non-CGI	FALSE	TRUE	FALSE
cg09162518	chr1	95089526	95089527	F3	2152	-82112	Non-CGI	FALSE	FALSE	TRUE
cg09163369	chr1	210001066	210001067	DIEXF	27042	-244	CGI-N-Shore	TRUE	FALSE	FALSE
cg09232269	chr1	207846808	207846809	CR1L	1379	28349	CGI-S-Shelf	FALSE	TRUE	FALSE
cg09317508	chr1	5896560	5896561	MIR4689	100616421	26239	CGI-S-Shore	FALSE	FALSE	TRUE
cg09416903	chr1	223494435	223494436	SUSD4	55061	43107	Non-CGI	FALSE	TRUE	FALSE
cg09664054	chr1	42179097	42179098	EDN2	1907	-228752	Non-CGI	FALSE	TRUE	FALSE
cg09790470	chr1	11594612	11594613	PTCHD2	57540	55316	CGI-N-Shore	FALSE	TRUE	FALSE
cg09809672	chr1	236557682	236557683	EDARADD	128178	1	CGI-N-Shore	TRUE	FALSE	FALSE
cg09862509	chr1	181069576	181069577	IER5	51278	11937	Non-CGI	FALSE	FALSE	TRUE
cg09874992	chr1	31314608	31314609	SDC3	9672	66870	Non-CGI	FALSE	FALSE	TRUE
cg09932694	chr1	1446840	1446841	ATAD3A	55210	-681	CGI-S-Shore	TRUE	FALSE	FALSE
cg09935388	chr1	92947588	92947589	GFI1	2672	4843	CGI	FALSE	TRUE	FALSE
cg09938518	chr1	42848996	42848997	RIMKLA	284716	2527	CGI-S-Shelf	FALSE	TRUE	FALSE
cg10010734	chr1	922010	922011	C1orf170	84808	-4536	CGI-S-Shelf	FALSE	FALSE	TRUE
cg10027159	chr1	204008552	204008553	LINC00303	284573	1838	Non-CGI	FALSE	TRUE	FALSE
cg10091866	chr1	185704549	185704550	HMCN1	83872	865	CGI-S-Shore	FALSE	TRUE	FALSE
cg10096122	chr1	198859579	198859580	MIR181A1	406995	-31296	Non-CGI	FALSE	TRUE	FALSE
cg10112270	chr1	21913458	21913459	ALPL	249	77599	CGI-N-Shore	FALSE	FALSE	TRUE
cg10194573	chr1	152730426	152730427	KPRP	448834	-78	CGI-N-Shelf	TRUE	FALSE	FALSE
cg10201923	chr1	17308303	17308304	MFAP2	4237	-221	CGI-S-Shore	TRUE	FALSE	FALSE
cg10212621	chr1	120311649	120311650	HMGCS2	3158	-93	Non-CGI	TRUE	FALSE	FALSE
cg10219223	chr1	6420713	6420714	ACOT7	11332	33111	Non-CGI	TRUE	TRUE	FALSE
cg10219850	chr1	215373449	215373450	KCNK2	3776	194563	Non-CGI	FALSE	TRUE	FALSE
cg10266188	chr1	32645867	32645868	TXLNA	200081	521	CGI	TRUE	TRUE	FALSE
cg10316857	chr1	163025988	163025989	RGS4	5999	-12406	Non-CGI	FALSE	FALSE	TRUE
cg10392572	chr1	56046489	56046490	MIR4422	100616272	355174	Non-CGI	TRUE	FALSE	FALSE
cg10443237	chr1	42621342	42621343	GUCA2B	2981	2249	Non-CGI	FALSE	TRUE	FALSE
cg10700717	chr1	151430878	151430879	POGZ	23126	1061	CGI	FALSE	TRUE	FALSE
cg10702191	chr1	112297855	112297856	DDX20	11218	-333	CGI	TRUE	TRUE	FALSE
cg10704177	chr1	62209607	62209608	INADL	10207	1457	CGI-S-Shore	FALSE	TRUE	FALSE
cg10721030	chr1	165902899	165902900	MIR3658	100500832	25740	Non-CGI	FALSE	FALSE	TRUE
cg10795646	chr1	151975566	151975567	S100A10	6281	-8851	Non-CGI	FALSE	TRUE	FALSE
cg10824915	chr1	916863	916864	C1orf170	84808	608	CGI-S-Shore	FALSE	TRUE	FALSE
cg10953378	chr1	14024101	14024102	PRDM2	7799	-2632	CGI-N-Shore	FALSE	FALSE	TRUE
cg11109027	chr1	207991720	207991721	LOC148696	148696	-2	CGI	TRUE	TRUE	FALSE
cg11137145	chr1	152730027	152730028	KPRP	448834	-477	CGI-N-Shelf	TRUE	FALSE	FALSE
cg11153172	chr1	11102897	11102898	MASP2	10747	4397	Non-CGI	FALSE	TRUE	FALSE
cg11210422	chr1	3347992	3347993	ARHGEF16	27237	-23153	CGI-S-Shore	FALSE	TRUE	FALSE
cg11314684	chr1	244006288	244006289	AKT3	10000	596	Non-CGI	FALSE	TRUE	FALSE
cg11341981	chr1	203096048	203096049	ADORA1	134	-786	CGI-N-Shore	TRUE	FALSE	FALSE
cg11344626	chr1	14026360	14026361	PRDM2	7799	-373	CGI-S-Shore	TRUE	FALSE	FALSE
cg11345352	chr1	86085258	86085259	CYR61	3491	38813	CGI-S-Shelf	FALSE	FALSE	TRUE
cg11393173	chr1	116369577	116369578	NHLH2	4808	14168	CGI-N-Shore	FALSE	FALSE	TRUE
cg11395799	chr1	115213248	115213249	DENND2C	163259	-203	CGI	TRUE	FALSE	FALSE
cg11415402	chr1	10509733	10509734	CORT	1325	-41	Non-CGI	TRUE	TRUE	FALSE
cg11425788	chr1	60136100	60136101	MIR4711	100616409	62866	Non-CGI	FALSE	TRUE	FALSE
cg11469137	chr1	11994385	11994386	PLOD1	5351	-337	CGI-N-Shore	TRUE	FALSE	FALSE
cg11576217	chr1	204381098	204381099	PPP1R15B	84919	-153	CGI	TRUE	FALSE	FALSE
cg11587191	chr1	3382237	3382238	ARHGEF16	27237	11089	CGI-S-Shelf	TRUE	TRUE	FALSE
cg11651538	chr1	56320950	56320951	MIR4422	100616272	629635	Non-CGI	FALSE	FALSE	TRUE
cg11683482	chr1	44678623	44678624	DMAP1	55929	-500	CGI-N-Shore	TRUE	FALSE	FALSE
cg11687966	chr1	204122321	204122322	ETNK2	55224	-1013	CGI-S-Shore	TRUE	FALSE	FALSE
cg11737757	chr1	2885168	2885169	ACTRT2	140625	-52876	CGI	FALSE	FALSE	TRUE
cg11754778	chr1	85516568	85516569	MCOLN3	55283	-2344	CGI-S-Shelf	FALSE	FALSE	TRUE
cg11797145	chr1	29557769	29557770	MECR	51102	-314	CGI-S-Shore	TRUE	FALSE	FALSE
cg11824121	chr1	17885510	17885511	ARHGEF10L	55160	19179	Non-CGI	FALSE	TRUE	FALSE
cg11835200	chr1	152769896	152769897	LCE1D	353134	668	Non-CGI	TRUE	TRUE	FALSE
cg11836829	chr1	212605702	212605703	NENF	29937	-525	CGI-N-Shore	TRUE	FALSE	FALSE
cg12033781	chr1	154600788	154600789	ADAR	103	-331	CGI-S-Shore	TRUE	FALSE	FALSE
cg12101256	chr1	196547408	196547409	MIR4735	100616363	4201	Non-CGI	FALSE	TRUE	FALSE
cg12467223	chr1	64259396	64259397	ROR1	4919	19705	Non-CGI	FALSE	TRUE	FALSE
cg12473797	chr1	3036358	3036359	MIR4251	100422968	-8179	CGI-N-Shore	FALSE	TRUE	FALSE
cg12548638	chr1	38226812	38226813	EPHA10	284656	4010	CGI-N-Shore	FALSE	TRUE	FALSE
cg12585910	chr1	161994363	161994364	OLFML2B	25903	-718	CGI-S-Shore	TRUE	FALSE	FALSE
cg12611449	chr1	201252200	201252201	PKP1	5317	-378	CGI-N-Shore	TRUE	FALSE	FALSE
cg13100137	chr1	37937945	37937946	LOC728431	728431	2097	CGI-N-Shore	FALSE	TRUE	FALSE
cg13168746	chr1	59165508	59165509	MYSM1	114803	237	CGI	FALSE	TRUE	FALSE
cg13209077	chr1	213554497	213554498	RPS6KC1	26750	329908	Non-CGI	FALSE	FALSE	TRUE
cg13224937	chr1	40387667	40387668	MYCL1	4610	-19979	CGI-N-Shore	FALSE	FALSE	TRUE
cg13282594	chr1	156211609	156211610	BGLAP	632	-340	CGI-N-Shelf	TRUE	TRUE	FALSE
cg13356175	chr1	153413641	153413642	S100A7L2	645922	-1137	Non-CGI	TRUE	FALSE	FALSE
cg13385220	chr1	202250453	202250454	UBE2T	29089	60639	Non-CGI	FALSE	TRUE	FALSE
cg13420413	chr1	2347015	2347016	PEX10	5192	-3004	CGI-S-Shelf	FALSE	FALSE	TRUE
cg13463719	chr1	2717754	2717755	TTC34	100287898	-11523	CGI-S-Shore	FALSE	FALSE	TRUE
cg13465000	chr1	9670867	9670868	TMEM201	199953	21934	CGI	FALSE	TRUE	FALSE
cg13474719	chr1	177034184	177034185	MIR488	574441	-35602	Non-CGI	FALSE	TRUE	FALSE
cg13476072	chr1	149908313	149908314	MTMR11	10903	476	Non-CGI	TRUE	TRUE	FALSE
cg13488557	chr1	25574588	25574589	SYF2	25949	-15574	CGI-S-Shore	TRUE	TRUE	FALSE
cg13839957	chr1	6165483	6165484	CHD5	26038	74709	CGI-N-Shore	FALSE	TRUE	FALSE
cg13844853	chr1	94062769	94062770	LOC100129046	100129046	5243	Non-CGI	FALSE	TRUE	FALSE
cg13974761	chr1	152670598	152670599	LCE2A	353139	-240	Non-CGI	TRUE	FALSE	FALSE
cg14035771	chr1	98515272	98515273	MIR137	406928	-3544	CGI-S-Shore	TRUE	FALSE	FALSE
cg14038009	chr1	241133052	241133053	MIR3123	100422856	-162518	Non-CGI	FALSE	TRUE	FALSE
cg14089067	chr1	55442785	55442786	TMEM61	199964	-3678	CGI-N-Shelf	FALSE	FALSE	TRUE
cg14091978	chr1	34652610	34652611	C1orf94	84970	19985	Non-CGI	FALSE	TRUE	FALSE
cg14167389	chr1	32708250	32708251	MTMR9LP	339483	-938	CGI-S-Shore	TRUE	FALSE	FALSE
cg14200127	chr1	97604182	97604183	PTBP2	58155	417006	Non-CGI	FALSE	TRUE	FALSE
cg14261309	chr1	53164287	53164288	SELRC1	65260	-248	CGI-S-Shore	TRUE	FALSE	FALSE
cg14413177	chr1	205760781	205760782	RAB7L1	8934	-16170	Non-CGI	FALSE	TRUE	FALSE
cg14783068	chr1	178611743	178611744	MIR4424	100616328	-35139	Non-CGI	FALSE	FALSE	TRUE
cg14790876	chr1	2798280	2798281	TTC34	100287898	-92049	CGI-N-Shore	FALSE	FALSE	TRUE
cg14793826	chr1	13835266	13835267	LRRC38	126755	4974	Non-CGI	FALSE	TRUE	FALSE
cg14828411	chr1	149817540	149817541	HIST2H2AA4	723790	-3221	CGI-S-Shelf	FALSE	FALSE	TRUE
cg15073147	chr1	247636811	247636812	OR2W5	441932	-17557	Non-CGI	FALSE	FALSE	TRUE
cg15102821	chr1	1844801	1844802	CALML6	163688	-1463	CGI-S-Shelf	TRUE	FALSE	FALSE
cg15108984	chr1	205560943	205560944	MFSD4	148808	22830	CGI-N-Shore	FALSE	TRUE	FALSE
cg15140322	chr1	224808956	224808957	CNIH3	149111	4776	CGI-S-Shelf	FALSE	TRUE	FALSE
cg15393490	chr1	207996459	207996460	LOC148696	148696	4734	CGI-N-Shore	TRUE	FALSE	FALSE
cg15597522	chr1	147320855	147320856	GJA8	2703	-54089	Non-CGI	FALSE	FALSE	TRUE
cg15605124	chr1	3230250	3230251	ARHGEF16	27237	-140895	CGI	FALSE	TRUE	FALSE
cg15654964	chr1	32860685	32860686	BSDC1	55108	-622	CGI	TRUE	FALSE	FALSE
cg15896593	chr1	22975587	22975588	C1QB	713	-4093	CGI-S-Shore	FALSE	FALSE	TRUE
cg15901647	chr1	18687127	18687128	KLHDC7A	127707	-120295	Non-CGI	TRUE	TRUE	FALSE
cg15926420	chr1	160159672	160159673	CASQ1	844	-611	Non-CGI	TRUE	FALSE	FALSE
cg16014412	chr1	9687471	9687472	PIK3CD	5293	-24317	CGI	FALSE	FALSE	TRUE
cg16028336	chr1	200194941	200194942	FAM58BP	339521	12284	Non-CGI	FALSE	FALSE	TRUE
cg16040306	chr1	166353877	166353878	FAM78B	149297	-217918	Non-CGI	FALSE	FALSE	TRUE
cg16046833	chr1	99136054	99136055	SNX7	51375	8817	Non-CGI	FALSE	TRUE	FALSE
cg16242604	chr1	157104991	157104992	ETV3	2117	3390	CGI-N-Shelf	FALSE	TRUE	FALSE
cg16248160	chr1	30138182	30138183	PTPRU	10076	575153	Non-CGI	FALSE	FALSE	TRUE
cg16305333	chr1	12123936	12123937	TNFRSF8	943	501	CGI	FALSE	TRUE	FALSE
cg16317038	chr1	38495051	38495052	UTP11L	51118	16666	Non-CGI	FALSE	FALSE	TRUE
cg16394551	chr1	3230357	3230358	ARHGEF16	27237	-140788	CGI	FALSE	TRUE	FALSE
cg16505550	chr1	57045708	57045709	PPAP2B	8613	-450	CGI-S-Shore	TRUE	FALSE	FALSE
cg16573386	chr1	1334508	1334509	CCNL2	81669	208	CGI	TRUE	FALSE	FALSE
cg16672421	chr1	229480001	229480002	CCSAP	126731	-1312	CGI-S-Shore	TRUE	FALSE	FALSE
cg16698116	chr1	149981734	149981735	OTUD7B	56957	950	CGI	FALSE	TRUE	FALSE
cg16718162	chr1	23963971	23963972	RPL11	6135	-54296	Non-CGI	FALSE	TRUE	FALSE
cg16738453	chr1	57029014	57029015	PPAP2B	8613	16241	Non-CGI	FALSE	TRUE	FALSE
cg16903060	chr1	24621673	24621674	GRHL3	57822	-24137	Non-CGI	FALSE	FALSE	TRUE
cg16926445	chr1	3064439	3064440	MIR4251	100422968	19899	CGI-S-Shore	FALSE	TRUE	FALSE
cg16985652	chr1	27241897	27241898	NR0B2	8431	-1329	Non-CGI	TRUE	TRUE	FALSE
cg17025555	chr1	158724362	158724363	OR6K6	128371	-242	Non-CGI	TRUE	FALSE	FALSE
cg17032646	chr1	110692918	110692919	SLC6A17	388662	-212	CGI-N-Shore	TRUE	FALSE	FALSE
cg17093466	chr1	45276537	45276538	BTBD19	149478	2382	CGI-N-Shelf	FALSE	TRUE	FALSE
cg17095278	chr1	79471984	79471985	ELTD1	64123	509	CGI-N-Shore	FALSE	TRUE	FALSE
cg17181543	chr1	77746571	77746572	AK5	26289	-1089	CGI-N-Shore	TRUE	FALSE	FALSE
cg17223866	chr1	44794158	44794159	ERI3	79033	26779	Non-CGI	FALSE	TRUE	FALSE
cg17233819	chr1	45266782	45266783	PLK3	1263	745	CGI	FALSE	TRUE	FALSE
cg17281600	chr1	157568591	157568592	FCRL4	83417	-720	Non-CGI	TRUE	FALSE	FALSE
cg17310611	chr1	113615709	113615710	LRIG2	9860	-120	CGI	TRUE	FALSE	FALSE
cg17385448	chr1	15911702	15911703	AGMAT	79814	-96	CGI-S-Shore	TRUE	TRUE	FALSE
cg17405031	chr1	91319662	91319663	BARHL2	343472	-136867	CGI-S-Shelf	FALSE	FALSE	TRUE
cg17431888	chr1	183203863	183203864	LAMC2	3918	48688	Non-CGI	FALSE	TRUE	FALSE
cg17440248	chr1	207842303	207842304	CR1L	1379	23844	CGI-N-Shore	FALSE	TRUE	FALSE
cg17448813	chr1	219547675	219547676	LYPLAL1	127018	200482	Non-CGI	FALSE	FALSE	TRUE
cg17479898	chr1	58920156	58920157	OMA1	115209	92288	Non-CGI	FALSE	TRUE	FALSE
cg17608500	chr1	154955711	154955712	FLAD1	80308	-57	CGI	TRUE	FALSE	FALSE
cg17740908	chr1	38064123	38064124	GNL2	29889	-2536	CGI-S-Shelf	FALSE	FALSE	TRUE
cg17796511	chr1	32566833	32566834	KPNA6	23633	-6809	Non-CGI	FALSE	TRUE	FALSE
cg17818873	chr1	153943564	153943565	CREB3L4	148327	3184	CGI-S-Shelf	FALSE	TRUE	FALSE
cg17827632	chr1	161087992	161087993	PFDN2	5202	-125	CGI	TRUE	TRUE	FALSE
cg17898069	chr1	234445489	234445490	MIR4671	100616380	3275	Non-CGI	FALSE	TRUE	FALSE
cg17901858	chr1	111062586	111062587	KCNA10	3744	-788	Non-CGI	TRUE	FALSE	FALSE
cg17936783	chr1	182027546	182027547	ZNF648	127665	3299	CGI-S-Shore	TRUE	TRUE	FALSE
cg18087326	chr1	53067637	53067638	GPX7	2882	-404	CGI-N-Shore	TRUE	FALSE	FALSE
cg18114036	chr1	156260918	156260919	C1orf85	112770	4529	CGI-N-Shore	FALSE	TRUE	FALSE
cg18185008	chr1	204589407	204589408	LRRN2	10446	65188	CGI-S-Shore	TRUE	TRUE	FALSE
cg18186327	chr1	38888789	38888790	LOC339442	339442	-208349	Non-CGI	FALSE	FALSE	TRUE
cg18221016	chr1	185934251	185934252	HMCN1	83872	230567	Non-CGI	FALSE	TRUE	FALSE
cg18277005	chr1	202858691	202858692	RABIF	5877	-305	CGI-S-Shore	TRUE	FALSE	FALSE
cg18439833	chr1	917642	917643	C1orf170	84808	-168	CGI	TRUE	FALSE	FALSE
cg18755543	chr1	54953632	54953633	ACOT11	26027	-54296	CGI	FALSE	FALSE	TRUE
cg18761813	chr1	181644542	181644543	CACNA1E	777	191855	Non-CGI	FALSE	TRUE	FALSE
cg18816826	chr1	237168540	237168541	RYR2	6262	-37160	CGI-S-Shore	TRUE	FALSE	FALSE
cg19084362	chr1	156811518	156811519	INSRR	3645	17192	CGI-N-Shelf	FALSE	TRUE	FALSE
cg19250709	chr1	152783489	152783490	LCE1B	353132	-956	Non-CGI	TRUE	FALSE	FALSE
cg19275091	chr1	119860821	119860822	HAO2	51179	-50579	Non-CGI	FALSE	FALSE	TRUE
cg19308769	chr1	31289850	31289851	LAPTM5	7805	-59166	Non-CGI	FALSE	FALSE	TRUE
cg19402179	chr1	93480883	93480884	FAM69A	388650	-53803	Non-CGI	FALSE	FALSE	TRUE
cg19596804	chr1	238540640	238540641	LOC339535	339535	108675	Non-CGI	FALSE	FALSE	TRUE
cg19675684	chr1	39456578	39456579	AKIRIN1	79647	-336	CGI-N-Shore	TRUE	FALSE	FALSE
cg19713429	chr1	19810690	19810691	CAPZB	832	1374	CGI-N-Shore	TRUE	TRUE	FALSE
cg19748495	chr1	150979359	150979360	FAM63A	55793	1493	CGI-N-Shore	TRUE	TRUE	FALSE
cg19760410	chr1	154300117	154300118	ATP8B2	57198	2080	CGI-S-Shore	TRUE	TRUE	FALSE
cg19769613	chr1	182028259	182028260	ZNF648	127665	2586	CGI-S-Shore	TRUE	TRUE	FALSE
cg19859993	chr1	207013239	207013240	IL20	50604	-25913	Non-CGI	FALSE	TRUE	FALSE
cg19868751	chr1	1955124	1955125	GABRD	2563	4355	CGI-S-Shore	FALSE	TRUE	FALSE
cg19872095	chr1	37941263	37941264	ZC3H12A	80149	1143	CGI	TRUE	TRUE	FALSE
cg19902593	chr1	56038708	56038709	MIR4422	100616272	347393	Non-CGI	FALSE	FALSE	TRUE
cg20144984	chr1	38604476	38604477	MIR3659	100500801	49572	Non-CGI	FALSE	FALSE	TRUE
cg20155035	chr1	235091106	235091107	SNORA14B	677802	200144	Non-CGI	FALSE	FALSE	TRUE
cg20160299	chr1	152733395	152733396	KPRP	448834	2888	CGI	TRUE	TRUE	FALSE
cg20240601	chr1	11322805	11322806	MTOR	2475	-196	CGI	TRUE	FALSE	FALSE
cg20272028	chr1	30526430	30526431	MATN1-AS1	100129196	-665187	Non-CGI	FALSE	FALSE	TRUE
cg20283505	chr1	175490611	175490612	TNR	7143	222139	Non-CGI	FALSE	TRUE	FALSE
cg20320200	chr1	217030433	217030434	ESRRG	2104	280662	Non-CGI	FALSE	TRUE	FALSE
cg20610017	chr1	173991134	173991135	RC3H1	149041	-28923	CGI	FALSE	FALSE	TRUE
cg20687616	chr1	56883736	56883737	PPAP2B	8613	161519	Non-CGI	FALSE	FALSE	TRUE
cg20698942	chr1	51910707	51910708	EPS15	2060	74286	Non-CGI	FALSE	TRUE	FALSE
cg20796027	chr1	44451670	44451671	CCDC24	149473	-5608	Non-CGI	FALSE	TRUE	FALSE
cg20900524	chr1	40563271	40563272	PPT1	5538	-128	CGI-S-Shore	TRUE	FALSE	FALSE
cg20960181	chr1	86094825	86094826	CYR61	3491	48380	Non-CGI	FALSE	FALSE	TRUE
cg20960392	chr1	65617331	65617332	AK4	205	4098	CGI-S-Shelf	FALSE	TRUE	FALSE
cg21139713	chr1	27675587	27675588	SYTL1	84958	7103	CGI-N-Shore	FALSE	TRUE	FALSE
cg21151355	chr1	35246607	35246608	GJB3	2707	-181	CGI-N-Shore	TRUE	FALSE	FALSE
cg21218864	chr1	206730120	206730121	RASSF5	83593	49240	CGI-N-Shore	TRUE	TRUE	FALSE
cg21304285	chr1	244525971	244525972	C1orf100	200159	10033	Non-CGI	FALSE	TRUE	FALSE
cg21396646	chr1	234039761	234039762	SLC35F3	148641	-916	CGI-N-Shore	TRUE	FALSE	FALSE
cg21408294	chr1	35257475	35257476	GJA4	2701	-694	CGI-N-Shore	TRUE	FALSE	FALSE
cg21416692	chr1	33803805	33803806	MIR3605	100500853	-5711	Non-CGI	TRUE	TRUE	FALSE
cg21437481	chr1	161067985	161067986	KLHDC9	126823	-164	CGI-N-Shore	TRUE	FALSE	FALSE
cg21535580	chr1	204121899	204121900	ETNK2	55224	-591	CGI-S-Shore	TRUE	FALSE	FALSE
cg21572480	chr1	53161198	53161199	SELRC1	65260	2838	CGI-N-Shelf	FALSE	TRUE	FALSE
cg21609826	chr1	155099264	155099265	EFNA1	1942	-1083	CGI	TRUE	FALSE	FALSE
cg21856670	chr1	19041952	19041953	PAX7	5081	84451	CGI-N-Shore	FALSE	TRUE	FALSE
cg21869913	chr1	12289560	12289561	VPS13D	55187	-551	CGI-N-Shore	TRUE	FALSE	FALSE
cg21908960	chr1	179556654	179556655	TDRD5	163589	-4092	CGI-S-Shore	TRUE	FALSE	FALSE
cg21918595	chr1	44784097	44784098	ERI3	79033	36840	Non-CGI	FALSE	TRUE	FALSE
cg21995800	chr1	111984376	111984377	ATP5F1	515	-7084	Non-CGI	FALSE	TRUE	FALSE
cg22026616	chr1	45275340	45275341	BTBD19	149478	1185	CGI-S-Shelf	FALSE	TRUE	FALSE
cg22075924	chr1	78005352	78005353	ZZZ3	26009	143750	Non-CGI	FALSE	TRUE	FALSE
cg22247664	chr1	110199126	110199127	GSTM2	2946	427	CGI-S-Shore	FALSE	TRUE	FALSE
cg22360146	chr1	115301208	115301209	CSDE1	7812	-536	CGI-S-Shore	TRUE	FALSE	FALSE
cg22361543	chr1	7757378	7757379	VAMP3	9341	-73949	Non-CGI	FALSE	TRUE	FALSE
cg22493620	chr1	22925489	22925490	EPHA8	2046	35484	CGI	FALSE	TRUE	FALSE
cg22515654	chr1	10590672	10590673	PEX14	5195	55668	CGI-S-Shore	FALSE	TRUE	FALSE
cg22851557	chr1	3038068	3038069	MIR4251	100422968	-6469	CGI-S-Shore	FALSE	TRUE	FALSE
cg22962923	chr1	1839959	1839960	CALML6	163688	-6305	CGI-N-Shore	FALSE	FALSE	TRUE
cg23225103	chr1	205040765	205040766	TMEM81	388730	12821	CGI-S-Shore	FALSE	TRUE	FALSE
cg23291900	chr1	223316927	223316928	TLR5	7100	-302	CGI-S-Shore	TRUE	FALSE	FALSE
cg23355725	chr1	12079976	12079977	MIIP	60672	676	CGI-S-Shore	FALSE	TRUE	FALSE
cg23615704	chr1	151736126	151736127	MRPL9	65005	-85	CGI	TRUE	TRUE	FALSE
cg23616139	chr1	221051907	221051908	HLX	3142	-834	CGI	TRUE	FALSE	FALSE
cg23627828	chr1	153540698	153540699	S100A2	6273	-2391	CGI	FALSE	FALSE	TRUE
cg23738345	chr1	184241100	184241101	C1orf21	81563	-115048	Non-CGI	FALSE	FALSE	TRUE
cg23819286	chr1	185984412	185984413	HMCN1	83872	280728	Non-CGI	FALSE	TRUE	FALSE
cg23843953	chr1	230262390	230262391	GALNT2	2590	68853	Non-CGI	FALSE	TRUE	FALSE
cg23913963	chr1	17766917	17766918	RCC2	55920	-666	CGI-S-Shore	TRUE	FALSE	FALSE
cg23915527	chr1	161368787	161368788	C1orf192	257177	-31122	CGI-N-Shore	FALSE	FALSE	TRUE
cg23924887	chr1	154298956	154298957	ATP8B2	57198	919	CGI-S-Shore	TRUE	TRUE	FALSE
cg23968579	chr1	5975890	5975891	MIR4689	100616421	-53088	CGI-S-Shelf	FALSE	TRUE	FALSE
cg23995459	chr1	53191787	53191788	ZYG11B	79699	-342	CGI-N-Shore	TRUE	FALSE	FALSE
cg24042923	chr1	234019447	234019448	SLC35F3	148641	-21230	Non-CGI	FALSE	FALSE	TRUE
cg24087736	chr1	68301529	68301530	GNG12	55970	-2373	CGI-S-Shore	FALSE	TRUE	FALSE
cg24249973	chr1	201347550	201347551	TNNT2	7139	-744	Non-CGI	TRUE	FALSE	FALSE
cg24316949	chr1	183601017	183601018	ARPC5	10092	3966	CGI-N-Shelf	FALSE	TRUE	FALSE
cg24325883	chr1	46713301	46713302	RAD54L	8438	-64	CGI	TRUE	FALSE	FALSE
cg24338843	chr1	12806667	12806668	C1orf158	93190	503	Non-CGI	FALSE	TRUE	FALSE
cg24343913	chr1	107937181	107937182	NTNG1	22854	254551	Non-CGI	TRUE	TRUE	FALSE
cg24361896	chr1	226112363	226112364	LEFTY1	10637	-397	CGI	TRUE	FALSE	FALSE
cg24498305	chr1	154540904	154540905	CHRNB2	1141	646	CGI-S-Shore	FALSE	TRUE	FALSE
cg24533917	chr1	203200291	203200292	CHIT1	1118	41644	Non-CGI	TRUE	TRUE	FALSE
cg24535643	chr1	108029106	108029107	NTNG1	22854	346476	Non-CGI	FALSE	FALSE	TRUE
cg24554839	chr1	166124903	166124904	MIR921	100126349	-867	Non-CGI	TRUE	TRUE	FALSE
cg24593832	chr1	178545287	178545288	C1orf220	400798	33355	Non-CGI	FALSE	FALSE	TRUE
cg24594979	chr1	14286966	14286967	PRDM2	7799	260230	Non-CGI	FALSE	FALSE	TRUE
cg24639703	chr1	64986155	64986156	CACHD1	57685	49678	Non-CGI	FALSE	TRUE	FALSE
cg24844545	chr1	11908347	11908348	NPPA	4878	-506	Non-CGI	TRUE	FALSE	FALSE
cg25136124	chr1	228336717	228336718	GJC2	57165	-696	Non-CGI	TRUE	FALSE	FALSE
cg25139084	chr1	37507293	37507294	GRIK3	2899	-7448	Non-CGI	FALSE	FALSE	TRUE
cg25190094	chr1	9321735	9321736	H6PD	9563	26871	CGI-N-Shore	FALSE	TRUE	FALSE
cg25194807	chr1	6295368	6295369	ICMT	23463	674	CGI-N-Shore	FALSE	TRUE	FALSE
cg25198007	chr1	26611319	26611320	SH3BGRL3	83442	5105	CGI-S-Shelf	FALSE	TRUE	FALSE
cg25308086	chr1	2996020	2996021	PRDM16	63976	10277	CGI-S-Shore	FALSE	TRUE	FALSE
cg25371564	chr1	43993236	43993237	PTPRF	5792	-3309	CGI-N-Shelf	FALSE	FALSE	TRUE
cg25469800	chr1	226175876	226175877	SDE2	163859	11188	Non-CGI	FALSE	TRUE	FALSE
cg25625457	chr1	203733042	203733043	LAX1	54900	-1240	Non-CGI	TRUE	FALSE	FALSE
cg25722983	chr1	36840028	36840029	STK40	83931	11455	Non-CGI	FALSE	TRUE	FALSE
cg25841309	chr1	27248983	27248984	NUDC	10726	758	CGI-S-Shore	FALSE	TRUE	FALSE
cg25845463	chr1	2064046	2064047	C1orf86	199990	75124	CGI	FALSE	TRUE	FALSE
cg25977900	chr1	114842468	114842469	SYT6	148281	-145995	Non-CGI	FALSE	FALSE	TRUE
cg26032419	chr1	81578539	81578540	LPHN2	23266	-193304	Non-CGI	FALSE	FALSE	TRUE
cg26063904	chr1	101313199	101313200	EXTL2	2135	47217	Non-CGI	FALSE	FALSE	TRUE
cg26064460	chr1	23703928	23703929	ZNF436	80818	-7570	Non-CGI	FALSE	FALSE	TRUE
cg26165286	chr1	224958213	224958214	CNIH3	149111	154033	Non-CGI	FALSE	FALSE	TRUE
cg26257034	chr1	214596216	214596217	PTPN14	5784	128806	Non-CGI	FALSE	TRUE	FALSE
cg26258588	chr1	11589971	11589972	PTCHD2	57540	50675	CGI	FALSE	TRUE	FALSE
cg26313955	chr1	117112616	117112617	CD58	965	1097	CGI-N-Shore	FALSE	TRUE	FALSE
cg26337841	chr1	37329331	37329332	GRIK3	2899	170511	Non-CGI	FALSE	TRUE	FALSE
cg26537883	chr1	145568368	145568369	PIAS3	10401	-6920	Non-CGI	FALSE	TRUE	FALSE
cg26550938	chr1	3827428	3827429	LOC100133612	100133612	10459	CGI-S-Shore	FALSE	TRUE	FALSE
cg26575914	chr1	228397977	228397978	OBSCN	84033	2115	CGI-N-Shore	FALSE	TRUE	FALSE
cg26616378	chr1	87169973	87169974	SH3GLB1	51100	-278	CGI	TRUE	FALSE	FALSE
cg26785800	chr1	27855045	27855046	WASF2	10163	-38366	CGI	FALSE	FALSE	TRUE
cg26801613	chr1	87793510	87793511	LMO4	8543	-639	CGI-N-Shore	TRUE	FALSE	FALSE
cg26822551	chr1	179544476	179544477	NPHS2	7827	606	CGI-N-Shore	FALSE	TRUE	FALSE
cg26897909	chr1	206629196	206629197	IKBKE	9641	-14388	CGI-S-Shore	FALSE	TRUE	FALSE
cg27175311	chr1	182106345	182106346	ZNF648	127665	-75497	Non-CGI	FALSE	FALSE	TRUE
cg27294168	chr1	2259878	2259879	LOC100129534	100129534	24220	CGI-S-Shore	FALSE	TRUE	FALSE
cg27522078	chr1	22290005	22290006	CELA3B	23436	-13411	Non-CGI	FALSE	FALSE	TRUE
cg27537199	chr1	2885085	2885086	ACTRT2	140625	-52959	CGI	FALSE	FALSE	TRUE
cg27542512	chr1	153963550	153963551	RPS27	6232	310	CGI-S-Shore	FALSE	TRUE	FALSE
cg27563423	chr1	100111387	100111388	PALMD	54873	-42	Non-CGI	TRUE	FALSE	FALSE
cg27571590	chr1	41353616	41353617	CITED4	163732	-25597	CGI-S-Shelf	FALSE	FALSE	TRUE
cg27589582	chr1	20658612	20658613	VWA5B1	127731	41199	Non-CGI	TRUE	TRUE	FALSE
ch.1.222606050F	chr1	224539427	224539429	CNIH4	29097	-5165	CGI-S-Shore	FALSE	FALSE	TRUE
ch.1.226360333F	chr1	228293710	228293712	C1orf35	79169	-2687	CGI-S-Shelf	FALSE	FALSE	TRUE
cg00028056	chr2	220407171	220407172	TMEM198	130612	-1212	CGI-S-Shore	TRUE	TRUE	FALSE
cg00046336	chr2	118617230	118617231	DDX18	8886	44974	CGI	FALSE	FALSE	TRUE
cg00113096	chr2	134119805	134119806	NCKAP5	344148	206224	Non-CGI	FALSE	TRUE	FALSE
cg00160301	chr2	152591303	152591304	NEB	4703	-301	Non-CGI	TRUE	FALSE	FALSE
cg00214970	chr2	229047701	229047702	SPHKAP	80309	-1339	CGI-S-Shore	TRUE	FALSE	FALSE
cg00283986	chr2	20875062	20875063	GDF7	151449	8637	CGI-S-Shelf	FALSE	FALSE	TRUE
cg00285317	chr2	238406108	238406109	MLPH	79083	11054	CGI-N-Shore	FALSE	TRUE	FALSE
cg00397714	chr2	192815005	192815006	SDPR	8436	-102998	Non-CGI	FALSE	TRUE	FALSE
cg00422624	chr2	16078724	16078725	MYCN	4613	-1957	CGI-N-Shore	TRUE	FALSE	FALSE
cg00486122	chr2	237405897	237405898	IQCA1	79781	10193	CGI	FALSE	TRUE	FALSE
cg00524271	chr2	198668185	198668186	PLCL1	5334	-1239	CGI-N-Shore	TRUE	FALSE	FALSE
cg00570580	chr2	111447255	111447256	BUB1	699	-11570	Non-CGI	TRUE	FALSE	FALSE
cg00684075	chr2	85969661	85969662	ATOH8	84913	-11246	Non-CGI	FALSE	FALSE	TRUE
cg00738085	chr2	206949648	206949649	INO80D	54891	1256	CGI-N-Shore	TRUE	TRUE	FALSE
cg00770316	chr2	146509846	146509847	PABPC1P2	728773	-834777	Non-CGI	FALSE	FALSE	TRUE
cg00811334	chr2	79739254	79739255	MIR4264	100422888	137229	CGI-N-Shore	TRUE	TRUE	FALSE
cg00819055	chr2	128848548	128848549	UGGT1	56886	-204	CGI-N-Shore	TRUE	FALSE	FALSE
cg00827380	chr2	118572045	118572046	DDX18	8886	-208	CGI-N-Shore	TRUE	FALSE	FALSE
cg00864666	chr2	173850250	173850251	ZAK	51776	-90313	Non-CGI	FALSE	TRUE	FALSE
cg00887112	chr2	202644572	202644573	ALS2	57679	1321	CGI-N-Shore	FALSE	TRUE	FALSE
cg00935043	chr2	227598603	227598604	IRS1	3667	64901	Non-CGI	FALSE	TRUE	FALSE
cg01051003	chr2	23193506	23193507	KLHL29	114818	-414790	Non-CGI	FALSE	FALSE	TRUE
cg01054140	chr2	240736286	240736287	LOC150935	150935	51731	CGI-N-Shore	FALSE	FALSE	TRUE
cg01150918	chr2	130348025	130348026	LOC389033	389033	343863	CGI-S-Shelf	FALSE	FALSE	TRUE
cg01152019	chr2	177015044	177015045	MIR10B	406903	12	CGI	TRUE	FALSE	FALSE
cg01154254	chr2	71205159	71205160	ANKRD53	79998	-414	CGI	TRUE	FALSE	FALSE
cg01193335	chr2	54949722	54949723	EML6	400954	-2425	CGI-N-Shore	FALSE	FALSE	TRUE
cg01254707	chr2	102953421	102953422	IL18R1	8809	25458	Non-CGI	TRUE	TRUE	FALSE
cg01395254	chr2	2336428	2336429	MYT1L	23040	-1382	CGI-N-Shore	TRUE	FALSE	FALSE
cg01412762	chr2	29751968	29751969	ALK	238	392507	Non-CGI	FALSE	TRUE	FALSE
cg01472464	chr2	3383078	3383079	TRAPPC12	51112	-366	CGI-S-Shore	TRUE	FALSE	FALSE
cg01628737	chr2	201559140	201559141	AOX2P	344454	-1304	Non-CGI	TRUE	FALSE	FALSE
cg01735083	chr2	592681	592682	TMEM18	129787	84756	CGI	FALSE	FALSE	TRUE
cg01736212	chr2	228189534	228189535	MFF	56947	-448	CGI-N-Shore	TRUE	TRUE	FALSE
cg01749742	chr2	18944047	18944048	NT5C1B-RDH14	100526794	-173200	Non-CGI	FALSE	FALSE	TRUE
cg01777397	chr2	29337946	29337947	CLIP4	79745	17374	CGI	TRUE	TRUE	FALSE
cg01788996	chr2	109403045	109403046	CCDC138	165055	-172	CGI	TRUE	FALSE	FALSE
cg01840575	chr2	38977957	38977958	SRSF7	6432	677	CGI	TRUE	TRUE	FALSE
cg01881966	chr2	177504062	177504063	LOC375295	375295	-1759	CGI-S-Shore	TRUE	FALSE	FALSE
cg01896085	chr2	9279786	9279787	ASAP2	8853	-67106	CGI-N-Shelf	FALSE	FALSE	TRUE
cg01942023	chr2	189837928	189837929	COL3A1	1281	-1169	Non-CGI	TRUE	FALSE	FALSE
cg01965462	chr2	213400697	213400698	ERBB4	2066	2653	CGI-N-Shore	FALSE	TRUE	FALSE
cg02069738	chr2	15702002	15702003	NBAS	51594	-547	CGI-S-Shore	TRUE	FALSE	FALSE
cg02085953	chr2	97202260	97202261	ARID5A	10865	-202	CGI-N-Shore	TRUE	FALSE	FALSE
cg02104392	chr2	134578960	134578961	NCKAP5	344148	-252928	Non-CGI	FALSE	FALSE	TRUE
cg02196655	chr2	10830764	10830765	NOL10	79954	-651	CGI-S-Shore	TRUE	FALSE	FALSE
cg02206636	chr2	73612757	73612758	ALMS1	7840	-127	CGI	TRUE	FALSE	FALSE
cg02251393	chr2	159651559	159651560	DAPL1	92196	-268	Non-CGI	TRUE	FALSE	FALSE
cg02489219	chr2	197676272	197676273	C2orf66	401027	-1271	Non-CGI	TRUE	FALSE	FALSE
cg02550257	chr2	222147678	222147679	EPHA4	2043	289330	Non-CGI	FALSE	FALSE	TRUE
cg02551646	chr2	216478293	216478294	FN1	2335	-177501	CGI-N-Shore	FALSE	TRUE	FALSE
cg02560388	chr2	11969958	11969959	MIR4262	100422996	7152	Non-CGI	FALSE	FALSE	TRUE
cg02630910	chr2	3150924	3150925	TSSC1	7260	230727	CGI	FALSE	FALSE	TRUE
cg02678482	chr2	60813272	60813273	BCL11A	53335	-32638	CGI-S-Shore	FALSE	FALSE	TRUE
cg02778243	chr2	239563383	239563384	LOC151171	151171	-99242	Non-CGI	FALSE	FALSE	TRUE
cg02787615	chr2	99434688	99434689	MGAT4A	11320	-87098	CGI-N-Shelf	FALSE	TRUE	FALSE
cg02812142	chr2	135595323	135595324	ACMSD	130013	-861	Non-CGI	TRUE	FALSE	FALSE
cg02878216	chr2	202097093	202097094	CASP8	841	-1071	Non-CGI	TRUE	FALSE	FALSE
cg02916472	chr2	218151983	218151984	TNP1	7141	-427200	Non-CGI	FALSE	TRUE	FALSE
cg02971124	chr2	55844609	55844610	SMEK2	57223	502	CGI	TRUE	FALSE	FALSE
cg03002264	chr2	147788732	147788733	PABPC1P2	728773	444106	Non-CGI	FALSE	FALSE	TRUE
cg03022921	chr2	8818497	8818498	ID2	3398	-3614	CGI	FALSE	FALSE	TRUE
cg03172098	chr2	33588519	33588520	RASGRP3	25780	-72895	Non-CGI	FALSE	TRUE	FALSE
cg03186986	chr2	69869962	69869963	AAK1	22848	1013	CGI-N-Shore	FALSE	TRUE	FALSE
cg03217115	chr2	118942841	118942842	INSIG2	51141	96790	CGI	FALSE	FALSE	TRUE
cg03247301	chr2	59058823	59058824	FLJ30838	400955	310934	Non-CGI	FALSE	TRUE	FALSE
cg03270167	chr2	238768916	238768917	RAMP1	10267	728	CGI	FALSE	TRUE	FALSE
cg03271533	chr2	128936635	128936636	UGGT1	56886	87880	Non-CGI	FALSE	TRUE	FALSE
cg03325330	chr2	41394687	41394688	SLC8A1	6546	-655111	Non-CGI	FALSE	FALSE	TRUE
cg03351618	chr2	170551124	170551125	PHOSPHO2-KLHL23	100526832	159	CGI	TRUE	TRUE	FALSE
cg03539474	chr2	172751088	172751089	SLC25A12	8604	-274	CGI	TRUE	FALSE	FALSE
cg03708155	chr2	217629419	217629420	IGFBP5	3488	-69146	Non-CGI	FALSE	FALSE	TRUE
cg03716125	chr2	208541770	208541771	CCNYL1	151195	-34492	Non-CGI	FALSE	FALSE	TRUE
cg03765885	chr2	119571674	119571675	EN1	2019	34083	Non-CGI	FALSE	FALSE	TRUE
cg03834467	chr2	217424608	217424609	RPL37A	6168	61087	Non-CGI	FALSE	FALSE	TRUE
cg04165683	chr2	109066028	109066029	GCC2	9648	450	CGI	FALSE	TRUE	FALSE
cg04209751	chr2	220386322	220386323	ASIC4	55515	7429	CGI-N-Shore	FALSE	TRUE	FALSE
cg04253876	chr2	30453758	30453759	LBH	81606	-637	CGI	TRUE	FALSE	FALSE
cg04361556	chr2	85034766	85034767	TRABD2A	129293	73484	Non-CGI	FALSE	TRUE	FALSE
cg04361749	chr2	240980455	240980456	PRR21	643905	1942	CGI-N-Shore	FALSE	FALSE	TRUE
cg04365609	chr2	239930900	239930901	MIR4440	100616397	59708	CGI	FALSE	FALSE	TRUE
cg04485956	chr2	1859071	1859072	PXDN	7837	-110779	CGI	FALSE	TRUE	FALSE
cg04589523	chr2	207537139	207537140	LOC200726	200726	29996	Non-CGI	FALSE	TRUE	FALSE
cg04726824	chr2	219435282	219435283	RQCD1	9125	1603	CGI-S-Shore	FALSE	TRUE	FALSE
cg04731861	chr2	219085781	219085782	ARPC2	10109	3906	CGI-S-Shelf	FALSE	TRUE	FALSE
cg04736911	chr2	71220904	71220905	TEX261	113419	1095	CGI-N-Shore	TRUE	TRUE	FALSE
cg04942260	chr2	218154430	218154431	TNP1	7141	-429647	Non-CGI	FALSE	TRUE	FALSE
cg04952609	chr2	139664238	139664239	YY1P2	647012	9343	CGI-S-Shelf	FALSE	FALSE	TRUE
cg05043774	chr2	236065984	236065985	SH3BP4	23677	205355	Non-CGI	FALSE	FALSE	TRUE
cg05135521	chr2	161188335	161188336	ITGB6	3694	-59935	Non-CGI	FALSE	TRUE	FALSE
cg05170040	chr2	65422256	65422257	ACTR2	10097	-32571	Non-CGI	FALSE	FALSE	TRUE
cg05274924	chr2	81691688	81691689	LRRTM1	347730	-1160200	CGI-N-Shelf	FALSE	FALSE	TRUE
cg05333279	chr2	20067114	20067115	FLJ12334	400946	-1499	CGI-N-Shore	TRUE	FALSE	FALSE
cg05363871	chr2	11638870	11638871	E2F6	1876	-32572	CGI-S-Shelf	FALSE	FALSE	TRUE
cg05469695	chr2	37899953	37899954	CDC42EP3	10602	-626	CGI	TRUE	FALSE	FALSE
cg05504732	chr2	42588526	42588527	COX7A2L	9167	7622	CGI	TRUE	TRUE	FALSE
cg05662884	chr2	126595338	126595339	GYPC	2995	-818344	Non-CGI	FALSE	FALSE	TRUE
cg05853130	chr2	138019701	138019702	THSD7B	80731	496585	Non-CGI	FALSE	TRUE	FALSE
cg05878786	chr2	192701329	192701330	SDPR	8436	10675	CGI	FALSE	TRUE	FALSE
cg05903736	chr2	240197131	240197132	MIR4269	100423043	-30024	CGI	FALSE	TRUE	FALSE
cg05918312	chr2	183370084	183370085	PDE1A	5136	17421	Non-CGI	FALSE	TRUE	FALSE
cg05939956	chr2	70437536	70437537	C2orf42	54980	-19384	Non-CGI	FALSE	TRUE	FALSE
cg05944477	chr2	205189476	205189477	PARD3B	117583	-221038	Non-CGI	FALSE	FALSE	TRUE
cg05991902	chr2	9385082	9385083	ASAP2	8853	38187	Non-CGI	FALSE	TRUE	FALSE
cg06002066	chr2	173337636	173337637	ITGA6	3655	45553	Non-CGI	FALSE	TRUE	FALSE
cg06062084	chr2	211090323	211090324	ACADL	33	-107	CGI	TRUE	FALSE	FALSE
cg06223080	chr2	127868745	127868746	BIN1	274	-3841	CGI-S-Shelf	FALSE	FALSE	TRUE
cg06293611	chr2	27308434	27308435	KHK	3795	-1175	CGI-N-Shore	TRUE	TRUE	FALSE
cg06394103	chr2	116480197	116480198	LOC389023	389023	-561276	Non-CGI	FALSE	TRUE	FALSE
cg06477164	chr2	37375682	37375683	EIF2AK2	5610	8506	Non-CGI	TRUE	TRUE	FALSE
cg06541218	chr2	146798769	146798770	PABPC1P2	728773	-545854	Non-CGI	FALSE	FALSE	TRUE
cg06567855	chr2	85977911	85977912	ATOH8	84913	-2996	CGI-N-Shelf	FALSE	FALSE	TRUE
cg06573398	chr2	234686914	234686915	UGT1A1	54658	17994	Non-CGI	FALSE	TRUE	FALSE
cg06620541	chr2	155101803	155101804	GALNT13	114805	373376	Non-CGI	TRUE	TRUE	FALSE
cg06655665	chr2	38607629	38607630	ATL2	64225	-3196	CGI-S-Shelf	FALSE	FALSE	TRUE
cg06844526	chr2	192169585	192169586	MYO1B	4430	59477	Non-CGI	FALSE	TRUE	FALSE
cg07070824	chr2	239543312	239543313	LOC151171	151171	-79171	CGI-S-Shore	FALSE	FALSE	TRUE
cg07103068	chr2	66706939	66706940	MEIS1	4211	44406	Non-CGI	FALSE	TRUE	FALSE
cg07105412	chr2	241197370	241197371	OTOS	150677	-117296	CGI	FALSE	FALSE	TRUE
cg07158040	chr2	191185285	191185286	HIBCH	26275	-513	CGI-S-Shore	TRUE	FALSE	FALSE
cg07298347	chr2	153264085	153264086	FMNL2	114793	72333	Non-CGI	FALSE	TRUE	FALSE
cg07420960	chr2	129230614	129230615	HS6ST1	9394	-154442	CGI-S-Shore	FALSE	FALSE	TRUE
cg07721625	chr2	183732607	183732608	FRZB	2487	-1108	CGI-S-Shore	TRUE	FALSE	FALSE
cg07783477	chr2	217564232	217564233	IGFBP5	3488	-3959	Non-CGI	FALSE	FALSE	TRUE
cg07805383	chr2	74346210	74346211	BOLA3	388962	28827	CGI-N-Shore	FALSE	FALSE	TRUE
cg07837078	chr2	12695813	12695814	TRIB2	28951	-161183	Non-CGI	FALSE	TRUE	FALSE
cg07934818	chr2	218520767	218520768	DIRC3	729582	100547	Non-CGI	FALSE	TRUE	FALSE
cg08000644	chr2	189600758	189600759	DIRC1	116093	54071	Non-CGI	TRUE	TRUE	FALSE
cg08127108	chr2	8866448	8866449	ID2	3398	44334	Non-CGI	FALSE	TRUE	FALSE
cg08245249	chr2	40342248	40342249	SLC8A1-AS1	100128590	197473	Non-CGI	FALSE	TRUE	FALSE
cg08373610	chr2	198540621	198540622	RFTN2	130132	-36	Non-CGI	TRUE	FALSE	FALSE
cg08382332	chr2	58728740	58728741	FLJ30838	400955	-19146	Non-CGI	FALSE	FALSE	TRUE
cg08400563	chr2	201729555	201729556	CLK1	1195	-87	CGI	TRUE	FALSE	FALSE
cg08479476	chr2	70313163	70313164	PCBP1-AS1	400960	982	CGI-N-Shore	TRUE	TRUE	FALSE
cg08525207	chr2	3622752	3622753	RPS7	6201	-99	CGI	TRUE	FALSE	FALSE
cg08558886	chr2	151469837	151469838	RND3	390	-125627	Non-CGI	FALSE	FALSE	TRUE
cg08697297	chr2	99912152	99912153	LYG1	129530	9064	Non-CGI	TRUE	TRUE	FALSE
cg08826839	chr2	163100125	163100126	FAP	2191	-79	Non-CGI	TRUE	FALSE	FALSE
cg08865524	chr2	147759520	147759521	PABPC1P2	728773	414894	Non-CGI	FALSE	FALSE	TRUE
cg08900106	chr2	173099800	173099801	DLX2	1746	-132321	CGI	FALSE	FALSE	TRUE
cg08940490	chr2	237514003	237514004	CXCR7	57007	44578	CGI-S-Shore	FALSE	FALSE	TRUE
cg09044294	chr2	50234533	50234534	FSHR	2492	-852866	Non-CGI	FALSE	TRUE	FALSE
cg09065714	chr2	27531535	27531536	UCN	7349	-404	CGI-S-Shore	TRUE	FALSE	FALSE
cg09143012	chr2	161587758	161587759	RBMS1	5937	-237439	Non-CGI	FALSE	FALSE	TRUE
cg09151381	chr2	71454505	71454506	PAIP2B	400961	-271	CGI	TRUE	FALSE	FALSE
cg09321363	chr2	84743263	84743264	DNAH6	1768	-314	CGI-N-Shore	TRUE	FALSE	FALSE
cg09339841	chr2	234649204	234649205	DNAJB3	414061	3455	CGI-N-Shelf	FALSE	TRUE	FALSE
cg09360044	chr2	68557960	68557961	CNRIP1	25927	-10776	Non-CGI	FALSE	FALSE	TRUE
cg09453252	chr2	47859049	47859050	KCNK12	56660	-61578	Non-CGI	FALSE	TRUE	FALSE
cg09464466	chr2	47500335	47500336	EPCAM	4072	-95950	CGI-S-Shore	FALSE	TRUE	FALSE
cg09540957	chr2	98414154	98414155	ZAP70	7535	84122	Non-CGI	FALSE	TRUE	FALSE
cg09546889	chr2	22918193	22918194	KLHL29	114818	-690103	Non-CGI	FALSE	FALSE	TRUE
cg09552548	chr2	232538286	232538287	PTMA	5757	-34947	Non-CGI	FALSE	FALSE	TRUE
cg09682913	chr2	30455589	30455590	LBH	81606	1191	CGI	FALSE	TRUE	FALSE
cg09699787	chr2	1711759	1711760	PXDN	7837	36530	CGI	FALSE	TRUE	FALSE
cg09759719	chr2	48956876	48956877	LHCGR	3973	26002	Non-CGI	FALSE	TRUE	FALSE
cg10103373	chr2	241080193	241080194	OTOS	150677	-119	CGI-S-Shelf	TRUE	FALSE	FALSE
cg10136008	chr2	138721566	138721567	HNMT	3176	-240	Non-CGI	TRUE	FALSE	FALSE
cg10216414	chr2	101868516	101868517	CNOT11	55571	-827	CGI-N-Shore	TRUE	FALSE	FALSE
cg10508783	chr2	165478953	165478954	GRB14	2888	-592	CGI-S-Shore	TRUE	FALSE	FALSE
cg10536369	chr2	170335894	170335895	KLHL41	10324	-110	CGI-N-Shore	TRUE	FALSE	FALSE
cg10537176	chr2	133395195	133395196	LYPD1	116372	33873	Non-CGI	FALSE	TRUE	FALSE
cg10540573	chr2	218869684	218869685	TNS1	7145	-1965	Non-CGI	TRUE	FALSE	FALSE
cg10637955	chr2	201675829	201675830	BZW1	9689	-438	CGI-N-Shore	TRUE	FALSE	FALSE
cg10648547	chr2	242051808	242051809	MTERFD2	130916	-10060	CGI	FALSE	TRUE	FALSE
cg10665960	chr2	149403594	149403595	EPC2	26122	1033	CGI-S-Shore	FALSE	TRUE	FALSE
cg10725390	chr2	66743000	66743001	MEIS1	4211	80467	Non-CGI	FALSE	TRUE	FALSE
cg10818657	chr2	74967690	74967691	SEMA4F	10505	86296	Non-CGI	FALSE	FALSE	TRUE
cg10906826	chr2	240985618	240985619	OR6B3	150681	-128	CGI-S-Shore	TRUE	FALSE	FALSE
cg10926413	chr2	235940023	235940024	SH3BP4	23677	79394	CGI-S-Shelf	FALSE	TRUE	FALSE
cg10933457	chr2	123503367	123503368	TSN	7247	990245	Non-CGI	FALSE	FALSE	TRUE
cg10944063	chr2	120233706	120233707	TMEM37	140738	44259	Non-CGI	FALSE	TRUE	FALSE
cg10959651	chr2	7018020	7018021	RSAD2	91543	223	Non-CGI	TRUE	FALSE	FALSE
cg10962805	chr2	125672110	125672111	CNTNAP5	129684	889245	Non-CGI	FALSE	TRUE	FALSE
cg10972865	chr2	198380184	198380185	MOB4	25843	-109	CGI-N-Shore	TRUE	TRUE	FALSE
cg11072498	chr2	87035609	87035610	CD8A	925	-89	CGI	TRUE	TRUE	FALSE
cg11073796	chr2	180748603	180748604	ZNF385B	151126	-22370	Non-CGI	FALSE	FALSE	TRUE
cg11086378	chr2	201634398	201634399	LOC100507140	100507140	-34497	Non-CGI	FALSE	TRUE	FALSE
cg11166303	chr2	3320529	3320530	TSSC1	7260	61122	CGI-N-Shore	FALSE	TRUE	FALSE
cg11246222	chr2	175595175	175595176	CHRNA1	1134	34023	CGI	FALSE	TRUE	FALSE
cg11275750	chr2	240895995	240895996	MIR4786	100616417	-13483	CGI	FALSE	FALSE	TRUE
cg11311499	chr2	47630845	47630846	MSH2	4436	638	CGI	FALSE	TRUE	FALSE
cg11344744	chr2	97526122	97526123	ANKRD39	51239	-2365	CGI-S-Shore	FALSE	TRUE	FALSE
cg11415156	chr2	20779199	20779200	HS1BP3	64342	71663	Non-CGI	FALSE	FALSE	TRUE
cg11430766	chr2	50852209	50852210	NRXN1	9378	407463	Non-CGI	TRUE	TRUE	FALSE
cg11469908	chr2	66918305	66918306	MEIS1	4211	255772	Non-CGI	FALSE	FALSE	TRUE
cg11593908	chr2	233547150	233547151	GIGYF2	26058	-14863	Non-CGI	FALSE	TRUE	FALSE
cg11856334	chr2	81422363	81422364	LRRTM1	347730	-890875	CGI	FALSE	FALSE	TRUE
cg11989407	chr2	239091683	239091684	ILKAP	80895	20639	Non-CGI	FALSE	TRUE	FALSE
cg12042952	chr2	100723240	100723241	AFF3	3899	35795	CGI-S-Shore	TRUE	TRUE	FALSE
cg12452952	chr2	189433317	189433318	DIRC1	116093	221512	Non-CGI	TRUE	TRUE	FALSE
cg12510203	chr2	144915087	144915088	GTDC1	79712	174994	Non-CGI	FALSE	TRUE	FALSE
cg12647257	chr2	47043387	47043388	LOC388948	388948	-418	Non-CGI	TRUE	FALSE	FALSE
cg12731010	chr2	218755486	218755487	TNS1	7145	112230	Non-CGI	FALSE	TRUE	FALSE
cg12800781	chr2	107486257	107486258	ST6GAL2	84620	17304	Non-CGI	FALSE	TRUE	FALSE
cg12819676	chr2	161465613	161465614	RBMS1	5937	-115294	Non-CGI	FALSE	FALSE	TRUE
cg13066889	chr2	71695782	71695783	DYSF	8291	15028	CGI-S-Shore	FALSE	TRUE	FALSE
cg13149736	chr2	149894539	149894540	LYPD6B	130576	-440	CGI-N-Shore	TRUE	FALSE	FALSE
cg13268671	chr2	166810585	166810586	TTC21B	79809	-236	CGI	TRUE	FALSE	FALSE
cg13278052	chr2	121142564	121142565	INHBB	3625	38844	Non-CGI	FALSE	FALSE	TRUE
cg13278738	chr2	23007744	23007745	KLHL29	114818	-600552	Non-CGI	FALSE	FALSE	TRUE
cg13289463	chr2	161273519	161273520	MIR4785	100616364	-9125	Non-CGI	FALSE	TRUE	FALSE
cg13320224	chr2	204299771	204299772	RAPH1	65059	100285	Non-CGI	FALSE	TRUE	FALSE
cg13388731	chr2	220143225	220143226	DNAJB2	3300	-813	CGI-N-Shore	TRUE	FALSE	FALSE
cg13391675	chr2	80009927	80009928	MIR4264	100422888	-133441	Non-CGI	FALSE	TRUE	FALSE
cg13449463	chr2	7560825	7560826	LOC100506274	100506274	-565	Non-CGI	TRUE	FALSE	FALSE
cg13582724	chr2	3507992	3507993	ADI1	55256	15356	CGI	FALSE	TRUE	FALSE
cg13783191	chr2	43618836	43618837	LOC100129726	100129726	164485	Non-CGI	FALSE	TRUE	FALSE
cg13801475	chr2	235989403	235989404	SH3BP4	23677	128774	Non-CGI	FALSE	FALSE	TRUE
cg13808592	chr2	164206540	164206541	FIGN	55137	385971	CGI-S-Shore	FALSE	FALSE	TRUE
cg13809528	chr2	10951921	10951922	PDIA6	10130	26180	CGI-N-Shore	FALSE	TRUE	FALSE
cg13843483	chr2	129250637	129250638	HS6ST1	9394	-174465	CGI-N-Shore	FALSE	FALSE	TRUE
cg13996593	chr2	230574596	230574597	DNER	92737	4688	CGI-N-Shelf	FALSE	TRUE	FALSE
cg14075579	chr2	104973253	104973254	LOC100287010	100287010	51535	CGI	FALSE	FALSE	TRUE
cg14102437	chr2	33359688	33359689	LTBP1	4052	187318	Non-CGI	TRUE	TRUE	FALSE
cg14123882	chr2	365531	365532	FAM150B	285016	-77222	CGI	FALSE	FALSE	TRUE
cg14362178	chr2	79007750	79007751	REG3G	130120	-245074	CGI-S-Shore	FALSE	FALSE	TRUE
cg14414124	chr2	68465373	68465374	PPP3R1	5534	14276	Non-CGI	FALSE	TRUE	FALSE
cg14499385	chr2	190446494	190446495	SLC40A1	30061	1988	CGI-S-Shore	TRUE	TRUE	FALSE
cg14503063	chr2	167235833	167235834	SCN9A	6335	-3335	CGI-S-Shelf	FALSE	FALSE	TRUE
cg14506141	chr2	98962105	98962106	CNGA3	1261	-511	CGI-N-Shore	TRUE	FALSE	FALSE
cg14592092	chr2	223916502	223916503	KCNE4	23704	-358	CGI-N-Shore	TRUE	FALSE	FALSE
cg14654773	chr2	80205127	80205128	LRRTM1	347730	326358	Non-CGI	FALSE	TRUE	FALSE
cg14659978	chr2	97563966	97563967	SEMA4C	54910	-28230	Non-CGI	TRUE	TRUE	FALSE
cg14663042	chr2	169382156	169382157	MIR4774	100616356	-57295	Non-CGI	FALSE	TRUE	FALSE
cg14730097	chr2	233632281	233632282	KCNJ13	3769	8992	Non-CGI	FALSE	TRUE	FALSE
cg14731400	chr2	42300755	42300756	PKDCC	91461	25593	Non-CGI	FALSE	FALSE	TRUE
cg14774817	chr2	182183372	182183373	MIR4437	100616213	-12992	Non-CGI	FALSE	TRUE	FALSE
cg14895540	chr2	186443903	186443904	FSIP2	401024	-159450	Non-CGI	FALSE	FALSE	TRUE
cg14983936	chr2	163228004	163228005	GCA	25801	27420	Non-CGI	FALSE	TRUE	FALSE
cg14989714	chr2	3826980	3826981	ALLC	55821	121193	CGI	FALSE	FALSE	TRUE
cg15009328	chr2	44057818	44057819	ABCG5	64240	8184	CGI-N-Shore	FALSE	TRUE	FALSE
cg15058210	chr2	240196877	240196878	MIR4269	100423043	-30278	CGI	FALSE	TRUE	FALSE
cg15225844	chr2	2189201	2189202	LOC730811	730811	-133801	CGI-N-Shore	FALSE	TRUE	FALSE
cg15344192	chr2	121347210	121347211	LOC84931	84931	-123284	CGI-S-Shore	FALSE	FALSE	TRUE
cg15488457	chr2	213870487	213870488	MIR4776-2	100616472	-79426	Non-CGI	FALSE	TRUE	FALSE
cg15792957	chr2	47604206	47604207	MIR559	693144	-606	Non-CGI	TRUE	TRUE	FALSE
cg15808063	chr2	131671228	131671229	ARHGEF4	50649	-1556	CGI-N-Shelf	TRUE	TRUE	FALSE
cg15894369	chr2	720975	720976	TMEM18	129787	-43535	CGI	FALSE	FALSE	TRUE
cg15906181	chr2	69870526	69870527	AAK1	22848	449	CGI	TRUE	TRUE	FALSE
cg15977002	chr2	1418294	1418295	TPO	7173	40298	Non-CGI	FALSE	TRUE	FALSE
cg16164923	chr2	197504013	197504014	CCDC150	284992	-341	CGI-N-Shore	TRUE	FALSE	FALSE
cg16177922	chr2	158102245	158102246	GALNT5	11227	-12093	Non-CGI	FALSE	FALSE	TRUE
cg16204289	chr2	75796759	75796760	EVA1A	84141	87	Non-CGI	TRUE	FALSE	FALSE
cg16276199	chr2	28974102	28974103	PPP1CB	5500	-508	CGI-N-Shore	TRUE	FALSE	FALSE
cg16345559	chr2	213933386	213933387	IKZF2	22807	82945	Non-CGI	FALSE	TRUE	FALSE
cg16386158	chr2	102927397	102927398	IL18R1	8809	-563	Non-CGI	TRUE	FALSE	FALSE
cg16431352	chr2	110459722	110459723	SOWAHC	65124	87810	Non-CGI	FALSE	FALSE	TRUE
cg16667845	chr2	131100001	131100002	CCDC115	84317	-78	CGI	TRUE	FALSE	FALSE
cg16759813	chr2	104988400	104988401	LOC100287010	100287010	36388	Non-CGI	FALSE	FALSE	TRUE
cg16909084	chr2	1711796	1711797	PXDN	7837	36493	CGI	FALSE	TRUE	FALSE
cg16981027	chr2	39193891	39193892	LOC375196	375196	-6405	Non-CGI	FALSE	TRUE	FALSE
cg17052675	chr2	3827356	3827357	ALLC	55821	121569	CGI-S-Shore	FALSE	FALSE	TRUE
cg17081914	chr2	134326366	134326367	NCKAP5	344148	-334	Non-CGI	TRUE	FALSE	FALSE
cg17177599	chr2	128213844	128213845	MIR4783	100616187	-32649	Non-CGI	FALSE	FALSE	TRUE
cg17343107	chr2	103240272	103240273	SLC9A2	6549	4105	CGI-S-Shelf	FALSE	TRUE	FALSE
cg17411035	chr2	237148507	237148508	ASB18	401036	24479	CGI-S-Shore	FALSE	TRUE	FALSE
cg17466768	chr2	25194156	25194157	DNAJC27	51277	805	CGI	TRUE	TRUE	FALSE
cg17591195	chr2	205130274	205130275	PARD3B	117583	-280240	Non-CGI	FALSE	FALSE	TRUE
cg17835072	chr2	71189456	71189457	ANKRD53	79998	-16117	CGI-N-Shelf	FALSE	TRUE	FALSE
cg17951588	chr2	239951254	239951255	MIR4440	100616397	39354	CGI-S-Shore	FALSE	FALSE	TRUE
cg18011760	chr2	19320928	19320929	MIR4757	100616307	-227260	Non-CGI	FALSE	FALSE	TRUE
cg18105667	chr2	211480881	211480882	CPS1-IT1	29034	-1412	Non-CGI	TRUE	TRUE	FALSE
cg18121713	chr2	17738759	17738760	VSNL1	7447	16951	Non-CGI	FALSE	TRUE	FALSE
cg18144655	chr2	114007341	114007342	LOC654433	654433	14233	Non-CGI	FALSE	TRUE	FALSE
cg18188916	chr2	158103335	158103336	GALNT5	11227	-11003	Non-CGI	FALSE	FALSE	TRUE
cg18257574	chr2	43358343	43358344	ZFP36L2	678	95400	Non-CGI	FALSE	FALSE	TRUE
cg18368599	chr2	127951465	127951466	CYP27C1	339761	26187	CGI-S-Shore	FALSE	TRUE	FALSE
cg18453200	chr2	75941939	75941940	GCFC2	6936	-3827	CGI-S-Shelf	FALSE	FALSE	TRUE
cg18561976	chr2	204801508	204801509	ICOS	29851	36	Non-CGI	TRUE	FALSE	FALSE
cg18736835	chr2	174719603	174719604	SP3	6670	110825	Non-CGI	FALSE	FALSE	TRUE
cg18740188	chr2	99918767	99918768	LYG1	129530	2449	Non-CGI	TRUE	TRUE	FALSE
cg18780276	chr2	85829672	85829673	TMEM150A	129303	148	CGI	TRUE	TRUE	FALSE
cg18881174	chr2	121283801	121283802	LOC84931	84931	-59875	CGI-S-Shelf	FALSE	FALSE	TRUE
cg18885210	chr2	121516533	121516534	GLI2	2736	23333	Non-CGI	FALSE	TRUE	FALSE
cg18986925	chr2	26635591	26635592	CCDC164	92749	10806	Non-CGI	FALSE	TRUE	FALSE
cg18990365	chr2	183106125	183106126	PPP1R1C	151242	255573	Non-CGI	FALSE	TRUE	FALSE
cg19039313	chr2	136634366	136634367	MCM6	4175	-354	CGI-S-Shore	TRUE	FALSE	FALSE
cg19057227	chr2	3479762	3479763	ADI1	55256	43586	CGI	FALSE	TRUE	FALSE
cg19077806	chr2	183244218	183244219	PDE1A	5136	143287	Non-CGI	FALSE	TRUE	FALSE
cg19159695	chr2	68923942	68923943	ARHGAP25	9938	17195	Non-CGI	FALSE	TRUE	FALSE
cg19183742	chr2	3659466	3659467	COLEC11	78989	16828	CGI-S-Shore	FALSE	TRUE	FALSE
cg19310458	chr2	80361612	80361613	LRRTM1	347730	169873	Non-CGI	FALSE	TRUE	FALSE
cg19350270	chr2	162929832	162929833	DPP4	1803	1218	CGI	FALSE	TRUE	FALSE
cg19350357	chr2	152118835	152118836	RBM43	375287	-445	CGI-S-Shore	TRUE	FALSE	FALSE
cg19350870	chr2	73008384	73008385	EXOC6B	23233	44791	Non-CGI	FALSE	TRUE	FALSE
cg19371706	chr2	23652036	23652037	KLHL29	114818	43737	Non-CGI	FALSE	TRUE	FALSE
cg19475988	chr2	189298330	189298331	MIR561	693146	136110	Non-CGI	FALSE	TRUE	FALSE
cg19583265	chr2	101086756	101086757	NMS	129521	-186	Non-CGI	TRUE	FALSE	FALSE
cg19821536	chr2	240986376	240986377	OR6B3	150681	-886	CGI-S-Shore	TRUE	FALSE	FALSE
cg19914919	chr2	161992878	161992879	TANK	10010	-586	Non-CGI	TRUE	FALSE	FALSE
cg19958021	chr2	5840827	5840828	SOX11	6664	8027	CGI-S-Shelf	TRUE	FALSE	FALSE
cg19975800	chr2	234544995	234544996	UGT1A10	54575	-126	Non-CGI	TRUE	TRUE	FALSE
cg20060108	chr2	102954350	102954351	IL18R1	8809	26387	Non-CGI	FALSE	TRUE	FALSE
cg20122492	chr2	165555694	165555695	SNORA70F	100337591	-11406	Non-CGI	TRUE	TRUE	FALSE
cg20261431	chr2	194808427	194808428	PCGEM1	64002	1193855	Non-CGI	FALSE	FALSE	TRUE
cg20304857	chr2	31298462	31298463	GALNT14	79623	79604	Non-CGI	FALSE	TRUE	FALSE
cg20343375	chr2	224866411	224866412	SERPINE2	5270	37623	Non-CGI	FALSE	TRUE	FALSE
cg20369299	chr2	213698158	213698159	MIR4776-1	100616267	-92821	CGI	FALSE	FALSE	TRUE
cg20445197	chr2	72057817	72057818	CYP26B1	56603	317144	Non-CGI	FALSE	FALSE	TRUE
cg20459495	chr2	159779958	159779959	TANC1	85461	-45186	Non-CGI	FALSE	FALSE	TRUE
cg20667782	chr2	26101343	26101344	ASXL2	55252	-30	CGI	TRUE	FALSE	FALSE
cg20706049	chr2	110026630	110026631	MIR4266	100423027	-96548	Non-CGI	FALSE	TRUE	FALSE
cg20786876	chr2	1938415	1938416	PXDN	7837	-190123	CGI-N-Shelf	FALSE	TRUE	FALSE
cg21038418	chr2	206421582	206421583	NRP2	8828	-125640	Non-CGI	FALSE	TRUE	FALSE
cg21440339	chr2	201378686	201378687	KCTD18	130535	-3893	CGI-S-Shelf	FALSE	FALSE	TRUE
cg21471828	chr2	183086277	183086278	PPP1R1C	151242	235725	Non-CGI	FALSE	TRUE	FALSE
cg21494367	chr2	46612724	46612725	EPAS1	2034	88182	CGI	FALSE	TRUE	FALSE
cg21511563	chr2	232059556	232059557	ARMC9	80210	-3784	CGI-S-Shelf	FALSE	FALSE	TRUE
cg21555085	chr2	1901211	1901212	PXDN	7837	-152919	Non-CGI	FALSE	TRUE	FALSE
cg21604741	chr2	27713092	27713093	IFT172	26160	-520	CGI-S-Shore	TRUE	FALSE	FALSE
cg21785832	chr2	9533680	9533681	ITGB1BP1	9270	29961	CGI-S-Shelf	FALSE	TRUE	FALSE
cg21844291	chr2	11097873	11097874	KCNF1	3754	45809	CGI-N-Shelf	FALSE	FALSE	TRUE
cg21860045	chr2	153456688	153456689	PRPF40A	55660	117285	Non-CGI	FALSE	TRUE	FALSE
cg21878934	chr2	187464581	187464582	ITGAV	3685	9790	Non-CGI	TRUE	TRUE	FALSE
cg22177920	chr2	242051779	242051780	MTERFD2	130916	-10031	CGI	FALSE	TRUE	FALSE
cg22437586	chr2	21865792	21865793	LOC645949	645949	67730	Non-CGI	FALSE	FALSE	TRUE
cg22543688	chr2	26628105	26628106	CCDC164	92749	3320	CGI-S-Shelf	FALSE	TRUE	FALSE
cg22793897	chr2	134513565	134513566	NCKAP5	344148	-187533	Non-CGI	FALSE	FALSE	TRUE
cg22908000	chr2	237489107	237489108	CXCR7	57007	19682	CGI-N-Shore	TRUE	TRUE	FALSE
cg23214755	chr2	11607042	11607043	E2F6	1876	-744	CGI-S-Shore	TRUE	FALSE	FALSE
cg23244226	chr2	161901182	161901183	TANK	10010	-92282	Non-CGI	FALSE	FALSE	TRUE
cg23278908	chr2	97001274	97001275	NCAPH	23397	-208	CGI-N-Shore	TRUE	FALSE	FALSE
cg23291376	chr2	20336282	20336283	LAPTM4A	9741	-84492	Non-CGI	FALSE	FALSE	TRUE
cg23510527	chr2	234601443	234601444	UGT1A6	54578	1121	Non-CGI	TRUE	TRUE	FALSE
cg23725986	chr2	75938438	75938439	GCFC2	6936	-326	CGI-S-Shore	TRUE	FALSE	FALSE
cg23728060	chr2	158113471	158113472	GALNT5	11227	-867	Non-CGI	TRUE	FALSE	FALSE
cg23838231	chr2	38306612	38306613	CYP1B1	1545	-3288	CGI-S-Shore	FALSE	FALSE	TRUE
cg23856611	chr2	236409849	236409850	AGAP1	116987	7115	Non-CGI	FALSE	TRUE	FALSE
cg23978064	chr2	242051650	242051651	MTERFD2	130916	-9902	CGI-N-Shore	FALSE	TRUE	FALSE
cg24301692	chr2	85696201	85696202	SH2D6	284948	50146	Non-CGI	FALSE	FALSE	TRUE
cg24465329	chr2	172452502	172452503	CYBRD1	79901	73635	Non-CGI	FALSE	FALSE	TRUE
cg24536827	chr2	146359434	146359435	DKFZp686O1327	401014	933899	Non-CGI	FALSE	FALSE	TRUE
cg24764372	chr2	8171376	8171377	LOC339788	339788	-54398	CGI-S-Shelf	FALSE	TRUE	FALSE
cg24764432	chr2	201354474	201354475	KCTD18	130535	20316	CGI-N-Shore	FALSE	TRUE	FALSE
cg24980856	chr2	14648452	14648453	FAM84A	151354	-124356	CGI-S-Shore	FALSE	FALSE	TRUE
cg24996440	chr2	3583570	3583571	RNASEH1	246243	22368	Non-CGI	FALSE	FALSE	TRUE
cg25278175	chr2	51065673	51065674	NRXN1	9378	193999	Non-CGI	FALSE	TRUE	FALSE
cg25300234	chr2	212938740	212938741	MIR548F2	100313771	352342	Non-CGI	FALSE	TRUE	FALSE
cg25306859	chr2	219899930	219899931	CCDC108	255101	6313	Non-CGI	FALSE	TRUE	FALSE
cg25415989	chr2	135010882	135010883	MGAT5	4249	-946	Non-CGI	TRUE	FALSE	FALSE
cg25498731	chr2	138045743	138045744	THSD7B	80731	522627	Non-CGI	FALSE	TRUE	FALSE
cg25523261	chr2	38118971	38118972	RMDN2	151393	-33489	Non-CGI	FALSE	FALSE	TRUE
cg25564535	chr2	98329463	98329464	ZAP70	7535	-566	Non-CGI	TRUE	FALSE	FALSE
cg25588844	chr2	10037561	10037562	TAF1B	9014	53989	Non-CGI	FALSE	TRUE	FALSE
cg25628433	chr2	101541328	101541329	RPL31	6160	-77361	Non-CGI	FALSE	TRUE	FALSE
cg25727520	chr2	37576821	37576822	QPCT	25797	5067	Non-CGI	FALSE	TRUE	FALSE
cg26091609	chr2	204734181	204734182	CTLA4	1493	1669	Non-CGI	FALSE	TRUE	FALSE
cg26304948	chr2	36905302	36905303	VIT	5212	-18529	Non-CGI	FALSE	FALSE	TRUE
cg26337868	chr2	151345498	151345499	RND3	390	-1288	CGI-S-Shore	TRUE	FALSE	FALSE
cg26574325	chr2	101584867	101584868	RPL31	6160	-33822	Non-CGI	FALSE	TRUE	FALSE
cg26703507	chr2	113404661	113404662	SLC20A1	6574	1226	CGI-S-Shore	FALSE	TRUE	FALSE
cg26884667	chr2	26828219	26828220	CIB4	130106	35990	Non-CGI	FALSE	TRUE	FALSE
cg26993951	chr2	73459854	73459855	PRADC1	84279	500	CGI-N-Shore	TRUE	TRUE	FALSE
cg27013848	chr2	118572668	118572669	DDX18	8886	412	CGI	FALSE	TRUE	FALSE
cg27026202	chr2	235200560	235200561	ARL4C	10123	205131	Non-CGI	FALSE	FALSE	TRUE
cg27145197	chr2	197874455	197874456	PGAP1	80055	-81935	Non-CGI	FALSE	TRUE	FALSE
cg27160395	chr2	177014949	177014950	MIR10B	406903	-80	CGI	TRUE	FALSE	FALSE
cg27281191	chr2	226202912	226202913	NYAP2	57624	-62688	Non-CGI	FALSE	FALSE	TRUE
cg27297505	chr2	121324526	121324527	LOC84931	84931	-100600	Non-CGI	FALSE	FALSE	TRUE
cg27329091	chr2	213698049	213698050	MIR4776-1	100616267	-92930	CGI	FALSE	FALSE	TRUE
cg27502952	chr2	242351401	242351402	FARP2	9855	55736	Non-CGI	FALSE	TRUE	FALSE
cg27503015	chr2	162270453	162270454	TBR1	10716	-2165	CGI-N-Shore	FALSE	FALSE	TRUE
cg27504460	chr2	188169789	188169790	CALCRL	10203	143230	Non-CGI	FALSE	FALSE	TRUE
ch.2.238980020F	chr2	239315281	239315283	ASB1	51665	-20342	CGI-S-Shelf	FALSE	FALSE	TRUE
cg00037856	chr3	127633627	127633628	KBTBD12	166348	-689	CGI-N-Shore	TRUE	FALSE	FALSE
cg00063111	chr3	39448952	39448953	RPSA	3921	747	CGI-S-Shore	TRUE	TRUE	FALSE
cg00108715	chr3	52565015	52565016	NT5DC2	64943	4076	CGI-N-Shelf	FALSE	TRUE	FALSE
cg00112341	chr3	55991024	55991025	MIR3938	100500875	-104401	Non-CGI	FALSE	TRUE	FALSE
cg00169373	chr3	50605269	50605270	HEMK1	51409	-1312	CGI	TRUE	TRUE	FALSE
cg00172020	chr3	150264474	150264475	EIF2A	83939	-98	CGI	TRUE	TRUE	FALSE
cg00201568	chr3	71214907	71214908	MIR1284	100302112	376331	Non-CGI	FALSE	TRUE	FALSE
cg00213142	chr3	51672239	51672240	TEX264	51368	-32981	Non-CGI	TRUE	TRUE	FALSE
cg00223877	chr3	53290290	53290291	TKT	7086	-159	CGI-S-Shore	TRUE	FALSE	FALSE
cg00234321	chr3	126061332	126061333	KLF15	28999	14902	CGI-N-Shore	FALSE	FALSE	TRUE
cg00328740	chr3	42573054	42573055	VIPR1	7433	42262	Non-CGI	TRUE	TRUE	FALSE
cg00473167	chr3	191046872	191046873	CCDC50	152137	0	CGI-N-Shore	TRUE	TRUE	FALSE
cg00486998	chr3	169072705	169072706	MECOM	2122	308856	Non-CGI	FALSE	TRUE	FALSE
cg00499139	chr3	150826472	150826473	MED12L	116931	23020	Non-CGI	FALSE	TRUE	FALSE
cg00585207	chr3	10452954	10452955	MIR885	100126334	-16707	Non-CGI	TRUE	TRUE	FALSE
cg00661523	chr3	151985426	151985427	MBNL1	4154	-401	CGI-N-Shore	TRUE	TRUE	FALSE
cg00664343	chr3	137902226	137902227	ARMC8	25852	-3920	CGI-N-Shelf	FALSE	FALSE	TRUE
cg00751770	chr3	79071297	79071298	ROBO1	6091	745760	CGI-S-Shelf	FALSE	TRUE	FALSE
cg00803692	chr3	46411474	46411475	CCR5	1234	-157	Non-CGI	TRUE	FALSE	FALSE
cg00838250	chr3	186287958	186287959	DNAJB11	51726	5	CGI	TRUE	FALSE	FALSE
cg00846043	chr3	37760790	37760791	CTDSPL	10217	-142877	Non-CGI	FALSE	TRUE	FALSE
cg00891146	chr3	59034566	59034567	C3orf67	200844	1190	CGI-N-Shore	FALSE	TRUE	FALSE
cg00906420	chr3	78917133	78917134	ROBO1	6091	899924	Non-CGI	FALSE	TRUE	FALSE
cg00965985	chr3	122232605	122232606	KPNA1	3836	1179	CGI-N-Shore	FALSE	TRUE	FALSE
cg00969035	chr3	148991036	148991037	CP	1356	-51203	Non-CGI	FALSE	FALSE	TRUE
cg01131388	chr3	157548511	157548512	SHOX2	6474	275439	Non-CGI	FALSE	FALSE	TRUE
cg01289541	chr3	170282058	170282059	SLC7A14	57709	21803	Non-CGI	FALSE	TRUE	FALSE
cg01292810	chr3	184241840	184241841	EPHB3	2049	-37745	CGI-N-Shore	FALSE	FALSE	TRUE
cg01323371	chr3	179667823	179667824	PEX5L	51555	86692	Non-CGI	FALSE	TRUE	FALSE
cg01340005	chr3	181429460	181429461	SOX2	6657	-250	CGI-S-Shore	TRUE	TRUE	FALSE
cg01362778	chr3	106147199	106147200	CBLB	868	-558932	Non-CGI	FALSE	FALSE	TRUE
cg01409985	chr3	133524160	133524161	SRPRB	58477	21282	CGI-N-Shore	FALSE	TRUE	FALSE
cg01563973	chr3	195530532	195530533	MUC4	4585	8310	CGI	FALSE	TRUE	FALSE
cg01647728	chr3	134368122	134368123	KY	339855	2354	CGI-N-Shore	FALSE	TRUE	FALSE
cg01671681	chr3	155421735	155421736	PLCH1	23007	260	Non-CGI	FALSE	TRUE	FALSE
cg01696984	chr3	185080356	185080357	MAP3K13	9175	79626	Non-CGI	TRUE	TRUE	FALSE
cg01710607	chr3	115417878	115417879	GAP43	2596	75726	Non-CGI	FALSE	TRUE	FALSE
cg01882260	chr3	164909748	164909749	SLITRK3	22865	4719	CGI-N-Shelf	TRUE	TRUE	FALSE
cg01912838	chr3	104222354	104222355	MIR548A3	693127	-276248	CGI	FALSE	FALSE	TRUE
cg02079455	chr3	13641006	13641007	LINC00620	285375	-51213	Non-CGI	FALSE	TRUE	FALSE
cg02254461	chr3	39195904	39195905	CSRNP1	64651	147	CGI-S-Shore	TRUE	TRUE	FALSE
cg02329527	chr3	19975483	19975484	EFHB	151651	13016	Non-CGI	TRUE	TRUE	FALSE
cg02333517	chr3	19975514	19975515	EFHB	151651	12985	Non-CGI	TRUE	TRUE	FALSE
cg02487823	chr3	197440451	197440452	FYTTD1	84248	-35971	Non-CGI	FALSE	TRUE	FALSE
cg02520519	chr3	4345006	4345007	SETMAR	6419	17	CGI	TRUE	TRUE	FALSE
cg02548228	chr3	173109390	173109391	NLGN1	22871	-6852	CGI-N-Shelf	FALSE	FALSE	TRUE
cg02556155	chr3	114052269	114052270	MIR568	693153	-16852	Non-CGI	FALSE	FALSE	TRUE
cg02632952	chr3	190426524	190426525	GMNC	647309	153939	Non-CGI	FALSE	FALSE	TRUE
cg02760495	chr3	139678075	139678076	CLSTN2	64084	24047	Non-CGI	FALSE	TRUE	FALSE
cg02807482	chr3	125708958	125708959	ROPN1B	152015	20929	CGI-N-Shore	FALSE	FALSE	TRUE
cg02923669	chr3	44511713	44511714	ZNF445	353274	49511	Non-CGI	FALSE	TRUE	FALSE
cg03060555	chr3	141131189	141131190	RASA2	5922	-74735	Non-CGI	FALSE	TRUE	FALSE
cg03307380	chr3	159353155	159353156	MIR3919	100500803	352719	Non-CGI	FALSE	TRUE	FALSE
cg03343083	chr3	189718843	189718844	LEPREL1	55214	121381	Non-CGI	FALSE	TRUE	FALSE
cg03399783	chr3	69062163	69062164	EOGT	285203	609	CGI	TRUE	TRUE	FALSE
cg03456393	chr3	193310565	193310566	OPA1	4976	-366	CGI-N-Shore	TRUE	FALSE	FALSE
cg03497419	chr3	37034654	37034655	EPM2AIP1	9852	139	CGI	TRUE	FALSE	FALSE
cg03508767	chr3	141332047	141332048	RNF7	9616	-125002	Non-CGI	FALSE	FALSE	TRUE
cg03509024	chr3	10184013	10184014	VHL	7428	693	CGI-S-Shore	FALSE	TRUE	FALSE
cg03544453	chr3	124769499	124769500	HEG1	57493	5301	Non-CGI	FALSE	TRUE	FALSE
cg03548224	chr3	48615932	48615933	MIR711	100313843	476	Non-CGI	FALSE	TRUE	FALSE
cg03556243	chr3	114343779	114343780	MIR4796	100616166	118591	Non-CGI	TRUE	TRUE	FALSE
cg03779374	chr3	114343825	114343826	MIR4796	100616166	118545	Non-CGI	TRUE	TRUE	FALSE
cg03791150	chr3	42542232	42542233	VIPR1	7433	11440	CGI-N-Shore	TRUE	TRUE	FALSE
cg03792964	chr3	73836161	73836162	PDZRN3	23024	-162088	Non-CGI	FALSE	FALSE	TRUE
cg03804083	chr3	168891416	168891417	MECOM	2122	490145	Non-CGI	FALSE	TRUE	FALSE
cg03831180	chr3	69915302	69915303	MITF	4286	126715	Non-CGI	TRUE	TRUE	FALSE
cg03847535	chr3	69812973	69812974	MITF	4286	24386	Non-CGI	TRUE	TRUE	FALSE
cg03863499	chr3	191670165	191670166	PYDC2	152138	491212	CGI-N-Shore	FALSE	FALSE	TRUE
cg03984209	chr3	55920018	55920019	MIR3938	100500875	-33395	Non-CGI	FALSE	TRUE	FALSE
cg04035392	chr3	47866155	47866156	DHX30	22907	21755	CGI-N-Shore	TRUE	TRUE	FALSE
cg04264726	chr3	49710768	49710769	APEH	327	-665	CGI-N-Shore	TRUE	FALSE	FALSE
cg04383462	chr3	50230536	50230537	GNAT1	2779	1492	CGI	FALSE	TRUE	FALSE
cg04441999	chr3	115500771	115500772	GAP43	2596	158619	CGI-N-Shelf	FALSE	FALSE	TRUE
cg04458548	chr3	186356700	186356701	FETUB	26998	2941	Non-CGI	TRUE	TRUE	FALSE
cg04514392	chr3	107086058	107086059	CCDC54	84692	-10128	Non-CGI	FALSE	FALSE	TRUE
cg04535236	chr3	128200769	128200770	GATA2	2624	11259	CGI-N-Shore	FALSE	TRUE	FALSE
cg04536829	chr3	127771995	127771996	SEC61A1	29927	782	CGI-S-Shore	FALSE	TRUE	FALSE
cg04538517	chr3	133649210	133649211	C3orf36	80111	-553	CGI-S-Shelf	TRUE	FALSE	FALSE
cg04787417	chr3	77146138	77146139	ROBO2	6092	1159492	CGI-N-Shore	FALSE	TRUE	FALSE
cg04789550	chr3	38065744	38065745	PLCD1	5333	5408	CGI-N-Shore	FALSE	TRUE	FALSE
cg05092583	chr3	140286910	140286911	TRIM42	287015	-109954	Non-CGI	FALSE	TRUE	FALSE
cg05094216	chr3	151101921	151101922	P2RY12	64805	621	Non-CGI	FALSE	TRUE	FALSE
cg05094695	chr3	69157839	69157840	LMOD3	56203	13905	Non-CGI	FALSE	TRUE	FALSE
cg05255994	chr3	139029435	139029436	MRPS22	56945	-33361	Non-CGI	FALSE	FALSE	TRUE
cg05279738	chr3	141560204	141560205	ATP1B3	483	-35264	Non-CGI	FALSE	FALSE	TRUE
cg05413694	chr3	11952913	11952914	TAMM41	132001	-64560	Non-CGI	TRUE	FALSE	FALSE
cg05580560	chr3	108607138	108607139	TRAT1	50852	65506	Non-CGI	FALSE	FALSE	TRUE
cg05652141	chr3	127058958	127058959	TPRA1	131601	250608	CGI-S-Shore	FALSE	TRUE	FALSE
cg05709162	chr3	113160071	113160072	WDR52	55779	288	CGI	FALSE	TRUE	FALSE
cg05710676	chr3	18258805	18258806	SATB1	6304	221458	Non-CGI	FALSE	TRUE	FALSE
cg05997021	chr3	180707907	180707908	DNAJC19	131118	-344	CGI-S-Shore	TRUE	FALSE	FALSE
cg06046574	chr3	125239327	125239328	SNX4	8723	-268	CGI-S-Shore	TRUE	FALSE	FALSE
cg06085454	chr3	52097578	52097579	LINC00696	100128378	1548	Non-CGI	TRUE	FALSE	FALSE
cg06117233	chr3	50375613	50375614	RASSF1	11186	2752	CGI	TRUE	TRUE	FALSE
cg06133062	chr3	62111708	62111709	ID2B	84099	-1315	Non-CGI	TRUE	TRUE	FALSE
cg06180356	chr3	145879710	145879711	PLOD2	5352	-427	CGI-S-Shore	TRUE	FALSE	FALSE
cg06181286	chr3	27064121	27064122	NEK10	152110	346789	Non-CGI	FALSE	FALSE	TRUE
cg06217072	chr3	10404348	10404349	MIR885	100126334	31896	Non-CGI	FALSE	TRUE	FALSE
cg06218523	chr3	124284219	124284220	UMPS	7372	-164992	Non-CGI	FALSE	TRUE	FALSE
cg06284479	chr3	37173546	37173547	LRRFIP2	9209	44303	Non-CGI	FALSE	TRUE	FALSE
cg06290884	chr3	42581432	42581433	VIPR1	7433	50640	CGI-S-Shelf	FALSE	FALSE	TRUE
cg06337592	chr3	98000733	98000734	OR5H2	79310	-997	Non-CGI	TRUE	FALSE	FALSE
cg06577604	chr3	184279443	184279444	EPHB3	2049	-142	CGI	TRUE	FALSE	FALSE
cg06620117	chr3	23818150	23818151	UBE2E1	7324	-29232	Non-CGI	FALSE	FALSE	TRUE
cg06685282	chr3	112453648	112453649	CCDC80	151887	-93670	Non-CGI	FALSE	FALSE	TRUE
cg06730953	chr3	187477229	187477230	BCL6	604	-13715	Non-CGI	FALSE	FALSE	TRUE
cg06798483	chr3	98504973	98504974	ST3GAL6	10402	53820	Non-CGI	FALSE	TRUE	FALSE
cg07061426	chr3	141111703	141111704	ZBTB38	253461	68647	Non-CGI	FALSE	TRUE	FALSE
cg07104253	chr3	47412988	47412989	PTPN23	25930	-9501	Non-CGI	FALSE	FALSE	TRUE
cg07144720	chr3	95038960	95038961	LOC255025	255025	381852	Non-CGI	FALSE	FALSE	TRUE
cg07351036	chr3	193792973	193792974	HES1	3280	-60956	CGI-S-Shelf	FALSE	FALSE	TRUE
cg07548668	chr3	151388160	151388161	MIR548H2	100313773	40839	CGI	FALSE	TRUE	FALSE
cg07582825	chr3	152769889	152769890	RAP2B	5912	-110138	Non-CGI	FALSE	FALSE	TRUE
cg07762764	chr3	24565992	24565993	MIR4792	100616448	-3065	CGI-S-Shelf	FALSE	FALSE	TRUE
cg07864327	chr3	127690108	127690109	KBTBD12	166348	55789	Non-CGI	FALSE	TRUE	FALSE
cg07894501	chr3	120461471	120461472	GTF2E1	2960	-85	CGI	TRUE	FALSE	FALSE
cg08062023	chr3	111393015	111393016	PLCXD2	257068	-506	CGI-N-Shore	TRUE	FALSE	FALSE
cg08091771	chr3	62175349	62175350	ID2B	84099	-64956	Non-CGI	FALSE	TRUE	FALSE
cg08124030	chr3	149095283	149095284	TM4SF1	4071	283	CGI-N-Shelf	TRUE	FALSE	FALSE
cg08175352	chr3	101894206	101894207	ZPLD1	131368	76117	Non-CGI	FALSE	TRUE	FALSE
cg08376864	chr3	192958726	192958727	HRASLS	57110	-190	CGI-N-Shore	TRUE	FALSE	FALSE
cg08381504	chr3	46792357	46792358	PRSS46	100287362	-14435	CGI	FALSE	TRUE	FALSE
cg08404225	chr3	3151899	3151900	IL5RA	3568	157	Non-CGI	TRUE	FALSE	FALSE
cg08408303	chr3	37441035	37441036	C3orf35	339883	13234	Non-CGI	TRUE	TRUE	FALSE
cg08470863	chr3	77524776	77524777	ROBO2	6092	1538130	CGI-S-Shelf	FALSE	TRUE	FALSE
cg08541155	chr3	118994052	118994053	ARHGAP31	57514	-19166	Non-CGI	FALSE	FALSE	TRUE
cg08596544	chr3	155572020	155572021	SLC33A1	9197	226	CGI	TRUE	FALSE	FALSE
cg08661012	chr3	45883249	45883250	CCR9	10803	-44745	CGI	FALSE	TRUE	FALSE
cg08708711	chr3	10157086	10157087	BRK1	55845	-245	CGI-N-Shore	TRUE	FALSE	FALSE
cg08832414	chr3	183993571	183993572	CAMK2N2	94032	-14319	CGI-N-Shore	TRUE	TRUE	FALSE
cg08855623	chr3	185217019	185217020	TMEM41A	90407	-173	CGI	TRUE	FALSE	FALSE
cg08877322	chr3	156825813	156825814	LOC339894	339894	14976	Non-CGI	FALSE	TRUE	FALSE
cg08923984	chr3	174048079	174048080	NAALADL2	254827	-529030	Non-CGI	FALSE	FALSE	TRUE
cg09423651	chr3	136618442	136618443	NCK1	4690	37391	Non-CGI	FALSE	TRUE	FALSE
cg09449927	chr3	65983019	65983020	MAGI1	9223	41488	Non-CGI	FALSE	TRUE	FALSE
cg09524078	chr3	52805336	52805337	NEK4	6787	-370	CGI-S-Shore	TRUE	FALSE	FALSE
cg09571950	chr3	46792364	46792365	PRSS46	100287362	-14442	CGI	FALSE	TRUE	FALSE
cg09704049	chr3	38348016	38348017	SLC22A14	9389	24226	Non-CGI	TRUE	TRUE	FALSE
cg09860486	chr3	51836419	51836420	IQCF4	100506840	-15198	Non-CGI	FALSE	FALSE	TRUE
cg09876440	chr3	10325981	10325982	LINC00852	84657	-120	Non-CGI	TRUE	TRUE	FALSE
cg10110335	chr3	12197630	12197631	TIMP4	7079	3219	CGI-N-Shelf	FALSE	TRUE	FALSE
cg10159529	chr3	3152530	3152531	IL5RA	3568	-471	Non-CGI	TRUE	FALSE	FALSE
cg10247798	chr3	52008826	52008827	ABHD14A-ACY1	100526760	-214	CGI	TRUE	TRUE	FALSE
cg10259872	chr3	122802215	122802216	PDIA5	10954	16358	Non-CGI	FALSE	TRUE	FALSE
cg10499651	chr3	12465415	12465416	TSEN2	80746	-60514	Non-CGI	FALSE	TRUE	FALSE
cg10639411	chr3	73150125	73150126	EBLN2	55096	39314	Non-CGI	FALSE	FALSE	TRUE
cg10660854	chr3	18092051	18092052	TBC1D5	9779	-307810	Non-CGI	FALSE	TRUE	FALSE
cg10726931	chr3	64195412	64195413	PRICKLE2	166336	15717	Non-CGI	FALSE	TRUE	FALSE
cg10773224	chr3	186458131	186458132	KNG1	3827	23032	Non-CGI	FALSE	TRUE	FALSE
cg10854474	chr3	15901989	15901990	ANKRD28	23243	-935	CGI	TRUE	FALSE	FALSE
cg10954944	chr3	184377617	184377618	MAGEF1	64110	52217	Non-CGI	FALSE	FALSE	TRUE
cg11027707	chr3	49967669	49967670	MON1A	84315	-223	CGI-S-Shore	TRUE	FALSE	FALSE
cg11038507	chr3	69985375	69985376	MITF	4286	196788	Non-CGI	TRUE	TRUE	FALSE
cg11081638	chr3	58619867	58619868	FAM107A	11170	-6529	Non-CGI	FALSE	TRUE	FALSE
cg11088861	chr3	183852756	183852757	EIF2B5	8893	-52	CGI	TRUE	FALSE	FALSE
cg11209289	chr3	138101415	138101416	MRAS	22808	34924	Non-CGI	FALSE	TRUE	FALSE
cg11268077	chr3	99657029	99657030	MIR3921	100500859	26211	Non-CGI	FALSE	TRUE	FALSE
cg11275049	chr3	78556150	78556151	ROBO1	6091	1260907	Non-CGI	FALSE	FALSE	TRUE
cg11293800	chr3	48412924	48412925	FBXW12	285231	-783	Non-CGI	TRUE	FALSE	FALSE
cg11300208	chr3	178422610	178422611	KCNMB2	10242	168385	Non-CGI	FALSE	TRUE	FALSE
cg11382133	chr3	16553855	16553856	RFTN1	23180	1365	CGI-N-Shore	FALSE	TRUE	FALSE
cg11593729	chr3	150690251	150690252	CLRN1	7401	533	Non-CGI	TRUE	TRUE	FALSE
cg12120205	chr3	74104862	74104863	PDZRN3	23024	-430789	Non-CGI	FALSE	FALSE	TRUE
cg12188830	chr3	57741926	57741927	SLMAP	7871	-1246	CGI	TRUE	FALSE	FALSE
cg12309479	chr3	48647426	48647427	UQCRC1	7384	-327	CGI-S-Shore	TRUE	FALSE	FALSE
cg12349422	chr3	52485216	52485217	TNNC1	7134	2839	Non-CGI	FALSE	TRUE	FALSE
cg12623930	chr3	52008802	52008803	ABHD14A-ACY1	100526760	-238	CGI	TRUE	TRUE	FALSE
cg12679230	chr3	155463133	155463134	PLCH1	23007	-41135	CGI	FALSE	FALSE	TRUE
cg12799739	chr3	97595056	97595057	MINA	84864	96237	Non-CGI	TRUE	FALSE	FALSE
cg12870811	chr3	62361449	62361450	FEZF2	55079	-2258	CGI-S-Shore	FALSE	FALSE	TRUE
cg12899747	chr3	25391527	25391528	RARB	5915	175703	Non-CGI	FALSE	TRUE	FALSE
cg12905873	chr3	197464143	197464144	FYTTD1	84248	-12279	CGI	TRUE	TRUE	FALSE
cg13002222	chr3	103532469	103532470	MIR548A3	693127	413634	Non-CGI	FALSE	FALSE	TRUE
cg13264770	chr3	42850066	42850067	CCBP2	1238	3819	CGI-S-Shelf	TRUE	TRUE	FALSE
cg13344886	chr3	45167106	45167107	CDCP1	64866	20806	Non-CGI	FALSE	TRUE	FALSE
cg13411656	chr3	141121016	141121017	ZBTB38	253461	77960	CGI	TRUE	TRUE	FALSE
cg13414750	chr3	53782863	53782864	CHDH	55349	97555	CGI-S-Shore	FALSE	TRUE	FALSE
cg13502716	chr3	52281709	52281710	PPM1M	132160	1899	CGI-S-Shore	TRUE	TRUE	FALSE
cg13520011	chr3	65339606	65339607	MIR548A2	693126	633922	CGI-N-Shelf	FALSE	FALSE	TRUE
cg13588739	chr3	50263508	50263509	GNAI2	2771	-214	CGI-N-Shore	TRUE	FALSE	FALSE
cg13679679	chr3	28282245	28282246	CMC1	152100	-877	CGI-N-Shore	TRUE	FALSE	FALSE
cg13719901	chr3	46608139	46608140	TDGF1	6997	-7904	CGI-S-Shore	TRUE	TRUE	FALSE
cg13764116	chr3	121906957	121906958	CASR	846	4426	CGI-S-Shelf	FALSE	TRUE	FALSE
cg14018079	chr3	10806175	10806176	LINC00606	285370	-297	Non-CGI	TRUE	FALSE	FALSE
cg14511417	chr3	38317689	38317690	SLC22A14	9389	-6098	Non-CGI	FALSE	TRUE	FALSE
cg14583319	chr3	122997585	122997586	SEC22A	26984	76810	Non-CGI	FALSE	FALSE	TRUE
cg14651453	chr3	62358825	62358826	FEZF2	55079	363	CGI	TRUE	TRUE	FALSE
cg14656948	chr3	30638618	30638619	TGFBR2	7048	-9374	Non-CGI	FALSE	FALSE	TRUE
cg14671809	chr3	55558213	55558214	WNT5A	7474	-36881	Non-CGI	FALSE	TRUE	FALSE
cg14775286	chr3	137833494	137833495	DZIP1L	199221	955	CGI-N-Shore	TRUE	TRUE	FALSE
cg14786212	chr3	192947753	192947754	HRASLS	57110	-11163	Non-CGI	FALSE	FALSE	TRUE
cg14944696	chr3	115155686	115155687	GAP43	2596	-186463	Non-CGI	FALSE	FALSE	TRUE
cg15034393	chr3	152856773	152856774	RAP2B	5912	-23254	Non-CGI	FALSE	FALSE	TRUE
cg15084803	chr3	14160960	14160961	CHCHD4	131474	5409	Non-CGI	FALSE	TRUE	FALSE
cg15099418	chr3	117593637	117593638	LSAMP-AS3	285194	1165001	Non-CGI	FALSE	FALSE	TRUE
cg15146567	chr3	42948626	42948627	ZNF662	389114	1223	CGI-S-Shore	FALSE	TRUE	FALSE
cg15360181	chr3	143567492	143567493	SLC9A9	285195	-118	Non-CGI	TRUE	FALSE	FALSE
cg15433422	chr3	196670053	196670054	LOC152217	152217	558	CGI	TRUE	FALSE	FALSE
cg15490784	chr3	126061950	126061951	KLF15	28999	14284	CGI-N-Shore	FALSE	TRUE	FALSE
cg15556905	chr3	133293499	133293500	CDV3	55573	1064	CGI	FALSE	TRUE	FALSE
cg15617591	chr3	146302692	146302693	PLSCR5	389158	21309	Non-CGI	FALSE	TRUE	FALSE
cg15680707	chr3	185303904	185303905	SENP2	59343	3396	CGI	TRUE	TRUE	FALSE
cg15782604	chr3	135915004	135915005	MSL2	55167	-315	CGI	TRUE	FALSE	FALSE
cg16163419	chr3	100712326	100712327	ABI3BP	25890	6	Non-CGI	TRUE	FALSE	FALSE
cg16358924	chr3	114036595	114036596	MIR568	693153	-1178	Non-CGI	TRUE	FALSE	FALSE
cg16370778	chr3	35721072	35721073	ARPP21	10777	39990	Non-CGI	TRUE	TRUE	FALSE
cg16496753	chr3	32511271	32511272	CMTM6	54918	33130	CGI-S-Shore	FALSE	FALSE	TRUE
cg16497277	chr3	49208875	49208876	KLHDC8B	200942	-141	CGI	TRUE	FALSE	FALSE
cg16566943	chr3	195530091	195530092	MUC4	4585	8751	CGI-S-Shore	FALSE	TRUE	FALSE
cg16588007	chr3	123300842	123300843	PTPLB	201562	3080	CGI-N-Shelf	FALSE	TRUE	FALSE
cg16612072	chr3	53380856	53380857	DCP1A	55802	796	CGI	FALSE	TRUE	FALSE
cg16787091	chr3	125725593	125725594	ROPN1B	152015	37564	Non-CGI	FALSE	TRUE	FALSE
cg16798686	chr3	61318369	61318370	FHIT	2272	-81235	Non-CGI	FALSE	FALSE	TRUE
cg16810559	chr3	64090850	64090851	LOC100287879	100287879	-17810	Non-CGI	FALSE	TRUE	FALSE
cg16929739	chr3	11178593	11178594	HRH1	3269	-184	Non-CGI	TRUE	FALSE	FALSE
cg16973715	chr3	64254112	64254113	PRICKLE2	166336	-42980	CGI-S-Shore	FALSE	FALSE	TRUE
cg17070539	chr3	16647103	16647104	DAZL	1618	-96	CGI	TRUE	FALSE	FALSE
cg17215446	chr3	44666125	44666126	ZNF197	10168	-384	CGI-N-Shore	TRUE	FALSE	FALSE
cg17280398	chr3	138478195	138478196	PIK3CB	5291	-9	Non-CGI	TRUE	FALSE	FALSE
cg17372022	chr3	65453516	65453517	MAGI1	9223	570991	Non-CGI	FALSE	TRUE	FALSE
cg17466567	chr3	185826590	185826591	ETV5	2119	309	CGI	TRUE	TRUE	FALSE
cg17808195	chr3	150690585	150690586	CLRN1	7401	199	Non-CGI	TRUE	TRUE	FALSE
cg17875356	chr3	114807036	114807037	ZBTB20	26137	59089	Non-CGI	FALSE	TRUE	FALSE
cg17892917	chr3	107823424	107823425	CD47	961	-13488	Non-CGI	FALSE	FALSE	TRUE
cg18012213	chr3	66904451	66904452	KBTBD8	84541	-144274	Non-CGI	FALSE	FALSE	TRUE
cg18112917	chr3	155029465	155029466	LOC100507537	100507537	-17975	CGI-S-Shore	FALSE	FALSE	TRUE
cg18132405	chr3	189840304	189840305	LEPREL1	55214	-77	CGI-S-Shore	TRUE	FALSE	FALSE
cg18194850	chr3	67699305	67699306	SUCLG2	8801	5731	Non-CGI	FALSE	TRUE	FALSE
cg18278943	chr3	57739651	57739652	SLMAP	7871	-3521	CGI-N-Shelf	FALSE	FALSE	TRUE
cg18358061	chr3	134126698	134126699	MIR4788	100616281	-29969	CGI-S-Shore	FALSE	FALSE	TRUE
cg18473544	chr3	14409599	14409600	SLC6A6	6533	-34505	Non-CGI	FALSE	FALSE	TRUE
cg18481087	chr3	160474064	160474065	PPM1L	151742	67	CGI	TRUE	FALSE	FALSE
cg18483487	chr3	45208900	45208901	CDCP1	64866	-20985	Non-CGI	FALSE	FALSE	TRUE
cg18532215	chr3	145879568	145879569	PLOD2	5352	-285	CGI	TRUE	FALSE	FALSE
cg18543991	chr3	145871392	145871393	PLOD2	5352	7888	Non-CGI	FALSE	TRUE	FALSE
cg18558476	chr3	197145694	197145695	DLG1	1739	-119550	Non-CGI	FALSE	FALSE	TRUE
cg18592272	chr3	149945180	149945181	TSC22D2	9819	-181606	Non-CGI	FALSE	FALSE	TRUE
cg18599996	chr3	148708821	148708822	GYG1	2992	-372	CGI-N-Shore	TRUE	FALSE	FALSE
cg18690922	chr3	98429487	98429488	ST3GAL6	10402	-21663	Non-CGI	FALSE	FALSE	TRUE
cg18746336	chr3	128216122	128216123	GATA2	2624	-4091	CGI	FALSE	FALSE	TRUE
cg18789887	chr3	16216100	16216101	DPH3	285381	90394	Non-CGI	TRUE	TRUE	FALSE
cg19139832	chr3	131631841	131631842	CPNE4	131034	372411	Non-CGI	FALSE	TRUE	FALSE
cg19200592	chr3	32877042	32877043	TRIM71	131405	17531	Non-CGI	FALSE	TRUE	FALSE
cg19219364	chr3	164621774	164621775	SI	6476	174507	Non-CGI	FALSE	FALSE	TRUE
cg19234171	chr3	128226071	128226072	LOC90246	90246	-605	Non-CGI	TRUE	FALSE	FALSE
cg19235307	chr3	129160154	129160155	IFT122	55764	1185	CGI-S-Shore	TRUE	TRUE	FALSE
cg19415736	chr3	183167772	183167773	LOC100505687	100505687	2375	CGI-S-Shore	FALSE	TRUE	FALSE
cg19430473	chr3	156468708	156468709	PA2G4P4	647033	61100	Non-CGI	FALSE	TRUE	FALSE
cg19478698	chr3	195530151	195530152	MUC4	4585	8691	CGI-S-Shore	FALSE	TRUE	FALSE
cg19497451	chr3	134331952	134331953	KY	339855	38524	Non-CGI	FALSE	TRUE	FALSE
cg19606153	chr3	42733759	42733760	KLHL40	131377	6747	Non-CGI	FALSE	TRUE	FALSE
cg19850728	chr3	97688465	97688466	MINA	84864	2828	CGI-N-Shelf	TRUE	TRUE	FALSE
cg19954985	chr3	160876409	160876410	B3GALNT1	8706	-53248	CGI-N-Shelf	FALSE	FALSE	TRUE
cg19995459	chr3	30647672	30647673	TGFBR2	7048	-320	CGI-N-Shore	TRUE	FALSE	FALSE
cg20370345	chr3	197682650	197682651	IQCG	84223	4234	Non-CGI	FALSE	TRUE	FALSE
cg20524905	chr3	159706348	159706349	IL12A	3592	-273	CGI-N-Shore	TRUE	TRUE	FALSE
cg20583930	chr3	155394109	155394110	PLCH1	23007	27886	Non-CGI	TRUE	TRUE	FALSE
cg20746482	chr3	55517496	55517497	WNT5A	7474	3833	CGI	FALSE	TRUE	FALSE
cg20832020	chr3	114012912	114012913	TIGIT	201633	757	Non-CGI	TRUE	FALSE	FALSE
cg20899213	chr3	142546545	142546546	PCOLCE2	26577	61498	Non-CGI	FALSE	TRUE	FALSE
cg20905413	chr3	36375125	36375126	STAC	6769	-46970	Non-CGI	FALSE	FALSE	TRUE
cg20917491	chr3	195578259	195578260	MUC4	4585	-39414	CGI-S-Shore	FALSE	FALSE	TRUE
cg20943723	chr3	155431380	155431381	PLCH1	23007	-9382	Non-CGI	FALSE	FALSE	TRUE
cg21069176	chr3	24347656	24347657	THRB	7068	188795	Non-CGI	FALSE	TRUE	FALSE
cg21422208	chr3	53164667	53164668	RFT1	91869	-196	CGI-S-Shore	TRUE	FALSE	FALSE
cg21490561	chr3	37034825	37034826	MLH1	4292	-14	CGI	TRUE	FALSE	FALSE
cg21580421	chr3	112361234	112361235	CCDC80	151887	-1256	Non-CGI	TRUE	FALSE	FALSE
cg21588838	chr3	190152481	190152482	TMEM207	131920	15182	Non-CGI	FALSE	TRUE	FALSE
cg21589858	chr3	99566949	99566950	CMSS1	84319	30270	Non-CGI	FALSE	TRUE	FALSE
cg21667939	chr3	100105109	100105110	LNP1	348801	-14926	Non-CGI	FALSE	TRUE	FALSE
cg21759685	chr3	46400618	46400619	CCR2	729230	5382	Non-CGI	FALSE	TRUE	FALSE
cg22083047	chr3	64211464	64211465	PRICKLE2	166336	-332	Non-CGI	TRUE	FALSE	FALSE
cg22143766	chr3	55514421	55514422	WNT5A	7474	6908	CGI-N-Shore	FALSE	TRUE	FALSE
cg22221575	chr3	195965369	195965370	SLC51A	200931	21985	Non-CGI	TRUE	TRUE	FALSE
cg22253393	chr3	115194543	115194544	GAP43	2596	-147606	Non-CGI	FALSE	FALSE	TRUE
cg22379463	chr3	45260330	45260331	TMEM158	25907	7482	Non-CGI	FALSE	FALSE	TRUE
cg22508782	chr3	49028594	49028595	P4HTM	54681	1252	CGI-S-Shore	FALSE	TRUE	FALSE
cg22577252	chr3	114012316	114012317	TIGIT	201633	161	Non-CGI	TRUE	FALSE	FALSE
cg22679740	chr3	64257335	64257336	PRICKLE2	166336	-46203	CGI-S-Shelf	FALSE	FALSE	TRUE
cg22700822	chr3	137414342	137414343	SOX14	8403	-68790	Non-CGI	FALSE	FALSE	TRUE
cg22797790	chr3	115975663	115975664	LSAMP	4045	188720	Non-CGI	FALSE	TRUE	FALSE
cg22871175	chr3	68974422	68974423	FAM19A4	151647	7337	Non-CGI	FALSE	TRUE	FALSE
cg22978384	chr3	35785107	35785108	MIR128-2	406916	-859	Non-CGI	TRUE	TRUE	FALSE
cg23015361	chr3	83656006	83656007	LOC440970	440970	1262718	Non-CGI	FALSE	FALSE	TRUE
cg23036949	chr3	185277779	185277780	LIPH	200879	-7409	CGI	FALSE	FALSE	TRUE
cg23044130	chr3	38065536	38065537	PLCD1	5333	5616	CGI-N-Shore	FALSE	TRUE	FALSE
cg23141914	chr3	125900824	125900825	ALDH1L1	10840	-1338	CGI-S-Shore	TRUE	TRUE	FALSE
cg23159337	chr3	193272778	193272779	ATP13A4	84239	-81	Non-CGI	TRUE	FALSE	FALSE
cg23330451	chr3	138739922	138739923	PRR23B	389151	-153	CGI-S-Shore	TRUE	FALSE	FALSE
cg23448803	chr3	36754544	36754545	DCLK3	85443	26806	Non-CGI	FALSE	TRUE	FALSE
cg23502565	chr3	157156180	157156181	PTX3	5806	1599	CGI	FALSE	TRUE	FALSE
cg23623851	chr3	148992037	148992038	CP	1356	-52204	Non-CGI	FALSE	FALSE	TRUE
cg24365518	chr3	196366618	196366619	LRRC33	375387	-36	CGI	TRUE	FALSE	FALSE
cg24525138	chr3	161349966	161349967	OTOL1	131149	135369	Non-CGI	FALSE	FALSE	TRUE
cg24716709	chr3	48658924	48658925	TMEM89	440955	263	Non-CGI	TRUE	FALSE	FALSE
cg24980458	chr3	71632677	71632678	FOXP1	27086	461	CGI-S-Shore	FALSE	TRUE	FALSE
cg25148336	chr3	15468722	15468723	METTL6	131965	318	CGI	TRUE	TRUE	FALSE
cg25183082	chr3	49142178	49142179	QARS	5859	-6	CGI	TRUE	FALSE	FALSE
cg25364469	chr3	114074297	114074298	ZBTB20-AS1	100131117	3638	CGI-S-Shelf	FALSE	TRUE	FALSE
cg25381017	chr3	3151795	3151796	IL5RA	3568	261	Non-CGI	TRUE	FALSE	FALSE
cg25499537	chr3	151177940	151177941	IGSF10	285313	-1442	CGI-N-Shore	TRUE	FALSE	FALSE
cg25707745	chr3	34884326	34884327	ARPP21	10777	-796753	Non-CGI	FALSE	FALSE	TRUE
cg25727569	chr3	53845287	53845288	CHDH	55349	35131	CGI-S-Shore	FALSE	TRUE	FALSE
cg25839267	chr3	77091645	77091646	ROBO2	6092	1104999	CGI-S-Shelf	FALSE	TRUE	FALSE
cg25929202	chr3	131755265	131755266	CPNE4	131034	248987	CGI-S-Shore	TRUE	TRUE	FALSE
cg26023908	chr3	107601974	107601975	LINC00636	285205	-76	Non-CGI	TRUE	FALSE	FALSE
cg26074940	chr3	66293457	66293458	SLC25A26	115286	174171	Non-CGI	FALSE	TRUE	FALSE
cg26088568	chr3	40407862	40407863	ENTPD3	956	-20809	Non-CGI	FALSE	FALSE	TRUE
cg26181731	chr3	104078476	104078477	MIR548A3	693127	-132370	Non-CGI	FALSE	FALSE	TRUE
cg26614073	chr3	47517819	47517820	SCAP	22937	-373	CGI-S-Shore	TRUE	FALSE	FALSE
cg26682661	chr3	38561466	38561467	EXOG	9941	23702	Non-CGI	FALSE	TRUE	FALSE
cg26790325	chr3	171593356	171593357	TMEM212	389177	32216	Non-CGI	FALSE	FALSE	TRUE
cg27084654	chr3	141118615	141118616	ZBTB38	253461	75559	CGI-N-Shelf	FALSE	TRUE	FALSE
cg27090727	chr3	161884911	161884912	OTOL1	131149	670314	Non-CGI	FALSE	FALSE	TRUE
cg27193080	chr3	129160612	129160613	IFT122	55764	1643	CGI-S-Shore	TRUE	TRUE	FALSE
cg27220148	chr3	100437347	100437348	TFG	10342	9212	Non-CGI	FALSE	TRUE	FALSE
cg27235662	chr3	190105986	190105987	CLDN16	10686	324	Non-CGI	TRUE	FALSE	FALSE
cg27304415	chr3	77064282	77064283	ROBO2	6092	1077636	Non-CGI	FALSE	TRUE	FALSE
cg27350326	chr3	186521698	186521699	RFC4	5984	2784	CGI-N-Shelf	FALSE	TRUE	FALSE
cg27386529	chr3	47517807	47517808	SCAP	22937	-361	CGI-S-Shore	TRUE	FALSE	FALSE
cg27402634	chr3	156536860	156536861	LOC730091	730091	-2008	CGI-S-Shore	FALSE	FALSE	TRUE
cg27570309	chr3	3886273	3886274	LRRN1	57633	45151	CGI-N-Shore	TRUE	TRUE	FALSE
cg00629217	chr4	54425349	54425350	LNX1	84708	93331	Non-CGI	TRUE	TRUE	FALSE
cg00739066	chr4	183995637	183995638	WWC2-AS2	152641	24713	Non-CGI	FALSE	FALSE	TRUE
cg00865429	chr4	10592777	10592778	CLNK	116449	93607	Non-CGI	FALSE	TRUE	FALSE
cg01134794	chr4	78529898	78529899	CXCL13	10563	96990	Non-CGI	FALSE	TRUE	FALSE
cg01214061	chr4	174290520	174290521	SAP30	8819	-1571	CGI-N-Shore	TRUE	FALSE	FALSE
cg01266375	chr4	129643491	129643492	PHF17	79960	-87286	Non-CGI	FALSE	FALSE	TRUE
cg01287850	chr4	79319046	79319047	ANXA3	306	-153694	Non-CGI	FALSE	TRUE	FALSE
cg01300684	chr4	141230118	141230119	SCOC	60592	51677	Non-CGI	FALSE	TRUE	FALSE
cg01368227	chr4	120648893	120648894	PDE5A	8654	-98911	Non-CGI	FALSE	FALSE	TRUE
cg01382100	chr4	57397125	57397126	ARL9	132946	25749	CGI	FALSE	FALSE	TRUE
cg01523860	chr4	103747967	103747968	UBE2D3	7323	42063	CGI	TRUE	TRUE	FALSE
cg01574644	chr4	163084858	163084859	FSTL5	56884	326	CGI-N-Shore	TRUE	FALSE	FALSE
cg01681290	chr4	159686146	159686147	FNIP2	57600	-4034	CGI-N-Shelf	FALSE	FALSE	TRUE
cg01713505	chr4	146018691	146018692	ABCE1	6059	-463	CGI-N-Shore	TRUE	TRUE	FALSE
cg02194398	chr4	142556368	142556369	IL15	3600	-1379	CGI-N-Shore	TRUE	FALSE	FALSE
cg02255004	chr4	80748660	80748661	GDEP	118425	34	Non-CGI	TRUE	FALSE	FALSE
cg02362506	chr4	25915353	25915354	C4orf52	389203	-459	CGI-N-Shore	TRUE	FALSE	FALSE
cg02512878	chr4	79698168	79698169	BMP2K	55589	635	CGI	FALSE	TRUE	FALSE
cg02628823	chr4	141419587	141419588	ELMOD2	255520	-25723	CGI	TRUE	FALSE	FALSE
cg02636177	chr4	72200331	72200332	SLC4A4	8671	147327	Non-CGI	FALSE	TRUE	FALSE
cg02775129	chr4	119771670	119771671	SEC24D	9871	-11842	Non-CGI	FALSE	FALSE	TRUE
cg02942142	chr4	169401797	169401798	DDX60L	91351	-158	CGI-S-Shore	TRUE	FALSE	FALSE
cg03456560	chr4	4866192	4866193	MSX1	4487	4799	CGI	FALSE	FALSE	TRUE
cg03461641	chr4	26454190	26454191	CCKAR	886	37850	Non-CGI	FALSE	FALSE	TRUE
cg03543110	chr4	57710817	57710818	SPINK2	6691	-22923	Non-CGI	FALSE	FALSE	TRUE
cg03666053	chr4	2765951	2765952	TNIP2	79155	-7847	CGI-S-Shore	FALSE	FALSE	TRUE
cg03671075	chr4	78573680	78573681	CXCL13	10563	140772	Non-CGI	FALSE	FALSE	TRUE
cg03838769	chr4	168156467	168156468	SPOCK3	50859	-725	CGI-S-Shore	TRUE	FALSE	FALSE
cg03870448	chr4	41214687	41214688	APBB2	323	1946	CGI-N-Shore	FALSE	TRUE	FALSE
cg04011940	chr4	110098978	110098979	COL25A1	84570	124819	Non-CGI	FALSE	TRUE	FALSE
cg04267605	chr4	52859928	52859929	LRRC66	339977	23856	CGI-N-Shore	FALSE	TRUE	FALSE
cg04353483	chr4	26493496	26493497	CCKAR	886	-1453	Non-CGI	TRUE	FALSE	FALSE
cg04493818	chr4	3644437	3644438	LOC100133461	100133461	35143	CGI-S-Shore	FALSE	FALSE	TRUE
cg04802386	chr4	103998345	103998346	SLC9B2	133308	92	CGI-S-Shore	TRUE	FALSE	FALSE
cg04812351	chr4	73177995	73177996	ADAMTS3	9508	256519	Non-CGI	TRUE	TRUE	FALSE
cg04854282	chr4	178682852	178682853	LOC285501	285501	32940	Non-CGI	FALSE	TRUE	FALSE
cg04958165	chr4	187360860	187360861	LOC285441	285441	61350	CGI-S-Shelf	FALSE	TRUE	FALSE
cg05004818	chr4	8539015	8539016	GPR78	27201	-42947	Non-CGI	FALSE	FALSE	TRUE
cg05106770	chr4	128545193	128545194	INTU	27152	-8892	CGI-S-Shore	FALSE	FALSE	TRUE
cg05148089	chr4	61523121	61523122	LPHN3	23284	-543851	Non-CGI	FALSE	FALSE	TRUE
cg05150667	chr4	23994603	23994604	PPARGC1A	10891	-102902	Non-CGI	FALSE	FALSE	TRUE
cg05211868	chr4	184718046	184718047	STOX2	56977	-108461	CGI-S-Shore	FALSE	FALSE	TRUE
cg05318777	chr4	122791956	122791957	BBS7	55212	-303	CGI-S-Shore	TRUE	FALSE	FALSE
cg05434397	chr4	166243335	166243336	MSMO1	6307	-5481	Non-CGI	FALSE	TRUE	FALSE
cg05740254	chr4	187148563	187148564	KLKB1	3818	-107	Non-CGI	TRUE	FALSE	FALSE
cg05763228	chr4	155664954	155664955	LRAT	9227	-196	CGI	TRUE	TRUE	FALSE
cg05790084	chr4	1546631	1546632	FAM53A	152877	139355	CGI	FALSE	FALSE	TRUE
cg05825121	chr4	67950111	67950112	CENPC1	1060	461143	Non-CGI	FALSE	FALSE	TRUE
cg05919202	chr4	5914761	5914762	MIR378D1	100616201	10292	Non-CGI	FALSE	TRUE	FALSE
cg06010326	chr4	83445884	83445885	TMEM150C	441027	37624	Non-CGI	FALSE	TRUE	FALSE
cg06193169	chr4	58030481	58030482	IGFBP7	3490	-53929	CGI	FALSE	TRUE	FALSE
cg06399905	chr4	80604140	80604141	GDEP	118425	-144483	Non-CGI	FALSE	FALSE	TRUE
[truncated: 3,442 more rows]
