# Supplementary material for: H3K4me1 marks DNA regions hypomethylated during aging in human stem and differentiated cells
Source: HighWire-hosted journal article supplement (doi:10.1101/gr.169011.113), 2014-09-30
Supplement: Supplemental_Table_23.xlsx [file Supplemental_Table_23.xlsx]

## Sheet: ST23
Supplemental Table 23: List of hypermethylated CpG sites where the Euclidean distance (ED) between MZ twins increased (> 2-fold) with age
Target ID	Chromosome	start	end	nearest.gene	nearest.gene.id	disttotss	hmm.cpgi	prom.reg	intra.reg	inter.reg
cg00001583	chr1	200011786	200011787	NR5A2	2494	15015	CGI	TRUE	TRUE	FALSE
cg00173141	chr1	210466172	210466173	HHAT	55733	-35422	CGI	FALSE	FALSE	TRUE
cg00565688	chr1	3568212	3568213	TP73	7161	-915	CGI	TRUE	FALSE	FALSE
cg00764612	chr1	150255213	150255214	C1orf51	148523	259	CGI	TRUE	TRUE	FALSE
cg00929392	chr1	19283191	19283192	IFFO2	126917	-364	CGI	TRUE	FALSE	FALSE
cg00987080	chr1	32930837	32930838	ZBTB8A	653121	178	CGI	FALSE	TRUE	FALSE
cg00988148	chr1	179555635	179555636	TDRD5	163589	-5111	CGI	FALSE	FALSE	TRUE
cg01134183	chr1	46860260	46860261	FAAH	2166	320	CGI	FALSE	TRUE	FALSE
cg01728493	chr1	17866589	17866590	ARHGEF10L	55160	258	CGI	FALSE	TRUE	FALSE
cg02296931	chr1	1144658	1144659	TNFRSF18	8784	-2568	CGI	FALSE	FALSE	TRUE
cg02356786	chr1	243265016	243265017	LOC731275	731275	28	CGI	TRUE	FALSE	FALSE
cg02448276	chr1	11845238	11845239	MTHFR	4524	20920	Non-CGI	FALSE	TRUE	FALSE
cg02572448	chr1	8763403	8763404	RERE	473	114294	CGI	FALSE	TRUE	FALSE
cg02638691	chr1	209849185	209849186	G0S2	50486	514	CGI	TRUE	TRUE	FALSE
cg03075534	chr1	240161447	240161448	RPS7P5	645884	-9375	CGI	FALSE	FALSE	TRUE
cg03526459	chr1	146549940	146549941	LOC728989	728989	-35340	CGI	TRUE	FALSE	FALSE
cg04025150	chr1	34642862	34642863	C1orf94	84970	10237	CGI	TRUE	TRUE	FALSE
cg04138112	chr1	167090618	167090619	DUSP27	92235	26546	CGI-N-Shore	FALSE	TRUE	FALSE
cg04143909	chr1	234367322	234367323	MIR4671	100616380	-74889	CGI	FALSE	TRUE	FALSE
cg04166042	chr1	50896246	50896247	DMRTA2	63950	-7126	CGI-S-Shelf	FALSE	FALSE	TRUE
cg04363624	chr1	47697965	47697966	TAL1	6886	-72	CGI	TRUE	TRUE	FALSE
cg04400972	chr1	117665053	117665054	TRIM45	80263	-641	CGI	TRUE	FALSE	FALSE
cg04501188	chr1	47904171	47904172	FOXD2	2306	2481	CGI	TRUE	FALSE	FALSE
cg04510788	chr1	37498900	37498901	GRIK3	2899	942	CGI	FALSE	TRUE	FALSE
cg04552470	chr1	20669792	20669793	VWA5B1	127731	52379	CGI	FALSE	TRUE	FALSE
cg04867733	chr1	77747987	77747988	AK5	26289	324	CGI	TRUE	FALSE	FALSE
cg04886391	chr1	23345709	23345710	KDM1A	23028	-230	CGI-N-Shore	TRUE	FALSE	FALSE
cg04897742	chr1	16085148	16085149	FBLIM1	54751	1993	CGI	TRUE	TRUE	FALSE
cg05340578	chr1	234634996	234634997	TARBP1	6894	-20146	Non-CGI	FALSE	FALSE	TRUE
cg05637536	chr1	154475068	154475069	TDRD10	126668	372	CGI	TRUE	FALSE	FALSE
cg05955287	chr1	54303980	54303981	TMEM48	55706	243	CGI	TRUE	FALSE	FALSE
cg06034096	chr1	74663680	74663681	LRRIQ3	127255	189	CGI	TRUE	FALSE	FALSE
cg06346974	chr1	65775059	65775060	DNAJC6	9829	54910	CGI	TRUE	TRUE	FALSE
cg06372391	chr1	62785079	62785080	KANK4	163782	2	CGI	TRUE	FALSE	FALSE
cg06641388	chr1	12655240	12655241	DHRS3	9249	22578	CGI-N-Shore	FALSE	TRUE	FALSE
cg06645033	chr1	50890678	50890679	DMRTA2	63950	-1558	CGI	TRUE	FALSE	FALSE
cg06935598	chr1	211433485	211433486	RCOR3	55758	776	CGI	TRUE	TRUE	FALSE
cg07029873	chr1	217311014	217311015	ESRRG	2104	81	CGI	TRUE	FALSE	FALSE
cg07104388	chr1	110091050	110091051	GNAI3	2773	-134	CGI	TRUE	FALSE	FALSE
cg07105947	chr1	35586588	35586589	ZMYM1	79830	41615	CGI	FALSE	FALSE	TRUE
cg07149609	chr1	170630734	170630735	PRRX1	5396	-2577	CGI	FALSE	FALSE	TRUE
cg07382920	chr1	3567646	3567647	WRAP73	49856	-974	CGI	TRUE	FALSE	FALSE
cg07605211	chr1	223538359	223538360	SUSD4	55061	-814	CGI	TRUE	FALSE	FALSE
cg07789132	chr1	164290751	164290752	PBX1	5087	-237844	CGI	FALSE	FALSE	TRUE
cg07793638	chr1	6675684	6675685	PHF13	148479	1927	CGI	FALSE	TRUE	FALSE
cg07953201	chr1	245851802	245851803	KIF26B	55083	533514	CGI	FALSE	TRUE	FALSE
cg07970040	chr1	9789165	9789166	C1orf200	644997	-74520	CGI	FALSE	TRUE	FALSE
cg08109624	chr1	242220925	242220926	MAP1LC3C	440738	-58539	CGI	FALSE	FALSE	TRUE
cg08231710	chr1	1566687	1566688	MMP23B	8510	-871	CGI	TRUE	FALSE	FALSE
cg08272731	chr1	75602167	75602168	LHX8	431707	8047	CGI	FALSE	TRUE	FALSE
cg08273935	chr1	2518354	2518355	FAM213B	127281	454	CGI	TRUE	TRUE	FALSE
cg08274380	chr1	109419600	109419601	GPSM2	29899	-1	CGI	TRUE	TRUE	FALSE
cg08655686	chr1	38100087	38100088	RSPO1	284654	506	CGI	FALSE	TRUE	FALSE
cg08709360	chr1	1003376	1003377	RNF223	401934	6309	CGI	FALSE	FALSE	TRUE
cg08845123	chr1	62784332	62784333	KANK4	163782	749	CGI	FALSE	TRUE	FALSE
cg08867825	chr1	102312608	102312609	DNAJA1P5	94236	-24957	Non-CGI	TRUE	TRUE	FALSE
cg08926982	chr1	10270439	10270440	KIF1B	23095	-323	CGI	TRUE	FALSE	FALSE
cg09075558	chr1	228246780	228246781	ARF1	375	-23579	CGI	FALSE	TRUE	FALSE
cg09106903	chr1	217309568	217309569	ESRRG	2104	1527	CGI	FALSE	TRUE	FALSE
cg09763175	chr1	57110722	57110723	PRKAA2	5563	-266	CGI	TRUE	FALSE	FALSE
cg10096873	chr1	92546470	92546471	BTBD8	284697	607	CGI	FALSE	TRUE	FALSE
cg10626236	chr1	1631100	1631101	MMP23A	8511	-276	CGI	TRUE	TRUE	FALSE
cg10839663	chr1	113261613	113261614	FAM19A3	284467	-1574	CGI	TRUE	FALSE	FALSE
cg10992267	chr1	82268588	82268589	LPHN2	23266	496742	CGI	FALSE	TRUE	FALSE
cg11235152	chr1	67600687	67600688	C1orf141	400757	-33	CGI	TRUE	FALSE	FALSE
cg11237215	chr1	244806055	244806056	DESI2	51029	-10295	CGI-N-Shore	FALSE	FALSE	TRUE
cg11521998	chr1	1536054	1536055	C1orf233	643988	-577	CGI	TRUE	FALSE	FALSE
cg11574975	chr1	112058304	112058305	RAP1A	5906	-26749	CGI	FALSE	TRUE	FALSE
cg11589139	chr1	229567139	229567140	ACTA1	58	2702	CGI-N-Shore	FALSE	TRUE	FALSE
cg11689813	chr1	229570052	229570053	ACTA1	58	-208	CGI	TRUE	FALSE	FALSE
cg11723801	chr1	156646485	156646486	NES	10763	702	CGI	TRUE	FALSE	FALSE
cg11732134	chr1	10732912	10732913	CASZ1	54897	123793	CGI	FALSE	TRUE	FALSE
cg11817309	chr1	249152443	249152444	ZNF692	55657	870	CGI-N-Shore	TRUE	TRUE	FALSE
cg11821626	chr1	150947403	150947404	CERS2	29956	74	CGI	TRUE	FALSE	FALSE
cg11831004	chr1	52834260	52834261	CC2D1B	200014	-2382	CGI	FALSE	FALSE	TRUE
cg12140144	chr1	2984275	2984276	FLJ42875	440556	12	CGI	TRUE	FALSE	FALSE
cg12141218	chr1	209799248	209799249	MIR4260	100422894	-2392	Non-CGI	FALSE	TRUE	FALSE
cg12167830	chr1	57111108	57111109	PRKAA2	5563	117	CGI	TRUE	FALSE	FALSE
cg12222949	chr1	184005360	184005361	GLT25D2	23127	1516	CGI-N-Shore	FALSE	TRUE	FALSE
cg12417362	chr1	201617355	201617356	NAV1	89796	-93	CGI	TRUE	FALSE	FALSE
cg12634306	chr1	40098811	40098812	HEYL	26508	6535	CGI	TRUE	TRUE	FALSE
cg12730853	chr1	64935328	64935329	CACHD1	57685	-1146	CGI-N-Shore	TRUE	FALSE	FALSE
cg13064658	chr1	212003989	212003990	LPGAT1	9926	123	CGI	TRUE	FALSE	FALSE
cg13067553	chr1	147782452	147782453	PPIAL4B	653505	172965	CGI	TRUE	TRUE	FALSE
cg13112404	chr1	182921688	182921689	SHCBP1L	81626	863	CGI	FALSE	TRUE	FALSE
cg13234569	chr1	207818036	207818037	CR1L	1379	-420	CGI-N-Shore	TRUE	FALSE	FALSE
cg13391456	chr1	24127242	24127243	GALE	2582	50	CGI	TRUE	FALSE	FALSE
cg13460643	chr1	209848845	209848846	G0S2	50486	174	CGI	TRUE	FALSE	FALSE
cg13697378	chr1	68512845	68512846	DIRAS3	9077	3634	CGI	TRUE	TRUE	FALSE
cg13803688	chr1	110610452	110610453	ALX3	257	2868	CGI	FALSE	TRUE	FALSE
cg13850606	chr1	229543554	229543555	ACTA1	58	26287	CGI	FALSE	FALSE	TRUE
cg13931925	chr1	179545216	179545217	NPHS2	7827	-131	CGI	TRUE	FALSE	FALSE
cg13993673	chr1	3447740	3447741	MIR551A	693135	29612	CGI	TRUE	TRUE	FALSE
cg14034757	chr1	209759145	209759146	CAMK1G	57172	2099	CGI	FALSE	TRUE	FALSE
cg14178748	chr1	153652247	153652248	NPR1	4881	1082	CGI	TRUE	FALSE	FALSE
cg15015892	chr1	151810887	151810888	LOC100132111	100132111	-56	CGI	TRUE	TRUE	FALSE
cg15084543	chr1	79472408	79472409	ELTD1	64123	85	CGI	TRUE	FALSE	FALSE
cg15154191	chr1	3527782	3527783	MEGF6	1953	275	CGI	TRUE	FALSE	FALSE
cg15561613	chr1	245851610	245851611	KIF26B	55083	533322	CGI	FALSE	TRUE	FALSE
cg15580417	chr1	160053947	160053948	KCNJ9	3765	2586	CGI	FALSE	TRUE	FALSE
cg15628917	chr1	60539559	60539560	C1orf87	127795	-116	CGI	TRUE	FALSE	FALSE
cg16145216	chr1	42385662	42385663	HIVEP3	59269	115932	CGI-S-Shore	TRUE	TRUE	FALSE
cg16306900	chr1	182026435	182026436	ZNF648	127665	4410	CGI	TRUE	TRUE	FALSE
cg16384593	chr1	1840436	1840437	CALML6	163688	-5828	CGI	FALSE	FALSE	TRUE
cg16391955	chr1	50881185	50881186	DMRTA2	63950	7932	CGI	FALSE	FALSE	TRUE
cg16648140	chr1	2434046	2434047	PANK4	55229	23987	CGI	FALSE	TRUE	FALSE
cg16704678	chr1	32230177	32230178	BAI2	576	-528	CGI	TRUE	FALSE	FALSE
cg16909962	chr1	229406711	229406712	RAB4A	5867	-166	CGI	TRUE	FALSE	FALSE
cg17131030	chr1	115632576	115632577	TSPAN2	10100	-454	CGI	TRUE	FALSE	FALSE
cg17142722	chr1	1363280	1363281	TMEM88B	643965	1771	CGI	FALSE	FALSE	TRUE
cg17463745	chr1	16554402	16554403	RSG1	79363	9255	CGI	FALSE	FALSE	TRUE
cg17716664	chr1	165204799	165204800	LMX1A	4009	121151	CGI	FALSE	TRUE	FALSE
cg17873612	chr1	23279531	23279532	LOC729059	729059	62810	CGI-N-Shore	FALSE	FALSE	TRUE
cg17908602	chr1	117317903	117317904	CD2	914	20816	CGI	FALSE	FALSE	TRUE
cg17941572	chr1	63784454	63784455	LINC00466	199899	-1552	CGI	TRUE	FALSE	FALSE
cg17949727	chr1	38412684	38412685	INPP5B	3633	43	Non-CGI	TRUE	FALSE	FALSE
cg17974166	chr1	23280069	23280070	LOC729059	729059	62272	CGI	FALSE	FALSE	TRUE
cg18325794	chr1	32083737	32083738	HCRTR1	3061	435	CGI	TRUE	TRUE	FALSE
cg18344652	chr1	95393096	95393097	CNN3	1266	-360	CGI	TRUE	FALSE	FALSE
cg18387017	chr1	1167389	1167390	SDF4	51150	56	CGI	TRUE	FALSE	FALSE
cg18794839	chr1	215256262	215256263	KCNK2	3776	77376	CGI	TRUE	TRUE	FALSE
cg18862597	chr1	17265457	17265458	MFAP2	4237	42622	CGI-N-Shore	TRUE	TRUE	FALSE
cg18935813	chr1	111149153	111149154	KCNA2	3737	24941	CGI	TRUE	TRUE	FALSE
cg19084726	chr1	145075538	145075539	PDE4DIP	9659	646	CGI	FALSE	TRUE	FALSE
cg19367540	chr1	112531802	112531803	KCND3	3752	-24	CGI	TRUE	FALSE	FALSE
cg19414591	chr1	91190582	91190583	BARHL2	343472	-7787	CGI	FALSE	FALSE	TRUE
cg19598416	chr1	223936812	223936813	CAPN2	824	47516	CGI	FALSE	TRUE	FALSE
cg19730691	chr1	119526437	119526438	TBX15	6913	5740	CGI	FALSE	TRUE	FALSE
cg19827787	chr1	23763612	23763613	TCEA3	6920	-12350	CGI	TRUE	TRUE	FALSE
cg20168230	chr1	37499649	37499650	GRIK3	2899	193	CGI	TRUE	FALSE	FALSE
cg20271029	chr1	46859845	46859846	FAAH	2166	-92	CGI	TRUE	FALSE	FALSE
cg20298273	chr1	156897330	156897331	LRRC71	149499	6905	CGI	FALSE	TRUE	FALSE
cg20311863	chr1	91184126	91184127	BARHL2	343472	-1331	CGI	TRUE	FALSE	FALSE
cg20511268	chr1	45805845	45805846	MUTYH	4595	295	CGI	TRUE	TRUE	FALSE
cg20594982	chr1	976707	976708	AGRN	375790	21203	CGI	FALSE	TRUE	FALSE
cg20611911	chr1	3567930	3567931	TP73	7161	-1197	CGI	TRUE	FALSE	FALSE
cg20826345	chr1	2350197	2350198	PEX10	5192	-6186	CGI-S-Shore	FALSE	FALSE	TRUE
cg21113740	chr1	79472343	79472344	ELTD1	64123	150	CGI	TRUE	FALSE	FALSE
cg21140898	chr1	51442318	51442319	CDKN2C	1031	8709	CGI	FALSE	FALSE	TRUE
cg21609640	chr1	166890380	166890381	TADA1	117143	-44725	CGI	FALSE	TRUE	FALSE
cg21863110	chr1	116380417	116380418	NHLH2	4808	3328	CGI	FALSE	TRUE	FALSE
cg21908235	chr1	146551744	146551745	LOC728989	728989	-37144	CGI	FALSE	FALSE	TRUE
cg21936179	chr1	206786180	206786181	EIF2D	1939	-275	CGI-S-Shore	TRUE	FALSE	FALSE
cg22371492	chr1	170637796	170637797	PRRX1	5396	4482	CGI	FALSE	TRUE	FALSE
cg22527425	chr1	21044753	21044754	KIF17	57576	-435	CGI	TRUE	FALSE	FALSE
cg22851420	chr1	40149650	40149651	HPCAL4	51440	7437	CGI	FALSE	TRUE	FALSE
cg23002761	chr1	16085642	16085643	FBLIM1	54751	2487	CGI	FALSE	TRUE	FALSE
cg23049458	chr1	62660624	62660625	L1TD1	54596	149	CGI	FALSE	TRUE	FALSE
cg23166865	chr1	63539729	63539730	LINC00466	199899	243170	CGI	FALSE	FALSE	TRUE
cg23281527	chr1	18809531	18809532	KLHDC7A	127707	2106	CGI	TRUE	FALSE	FALSE
cg23291161	chr1	201368914	201368915	LAD1	3898	-244	CGI	TRUE	FALSE	FALSE
cg23613205	chr1	246887766	246887767	SCCPDH	51097	387	CGI	TRUE	FALSE	FALSE
cg23695504	chr1	247275344	247275345	C1orf229	388759	373	CGI	TRUE	FALSE	FALSE
cg23730181	chr1	70033739	70033740	LRRC7	57554	870	CGI	TRUE	FALSE	FALSE
cg23847109	chr1	40783060	40783061	COL9A2	1298	0	CGI	TRUE	FALSE	FALSE
cg23981150	chr1	161111090	161111091	DEDD	9191	-8611	CGI	FALSE	FALSE	TRUE
cg23987789	chr1	7842406	7842407	PER3	8863	-1972	CGI-N-Shore	TRUE	FALSE	FALSE
cg24080008	chr1	38600199	38600200	MIR3659	100500801	45295	CGI	FALSE	FALSE	TRUE
cg24306982	chr1	119549312	119549313	TBX15	6913	-17132	CGI	FALSE	FALSE	TRUE
cg24364143	chr1	33005702	33005703	ZBTB8A	653121	75043	CGI	FALSE	TRUE	FALSE
cg24393673	chr1	102312610	102312611	DNAJA1P5	94236	-24955	Non-CGI	TRUE	TRUE	FALSE
cg24444923	chr1	23280477	23280478	LOC729059	729059	61864	CGI	FALSE	FALSE	TRUE
cg24466241	chr1	53308908	53308909	ZYG11A	440590	724	CGI	FALSE	TRUE	FALSE
cg24486037	chr1	151345181	151345182	SELENBP1	8991	-16	Non-CGI	TRUE	FALSE	FALSE
cg24658517	chr1	221065322	221065323	HLX	3142	12578	CGI	FALSE	FALSE	TRUE
cg24713770	chr1	20649959	20649960	VWA5B1	127731	32546	Non-CGI	FALSE	TRUE	FALSE
cg25035631	chr1	35586358	35586359	ZMYM1	79830	41385	CGI-N-Shore	FALSE	FALSE	TRUE
cg25104186	chr1	34098967	34098968	ZSCAN20	7579	160734	CGI	FALSE	TRUE	FALSE
cg25147376	chr1	166890293	166890294	TADA1	117143	-44638	CGI	FALSE	TRUE	FALSE
cg25191850	chr1	233749633	233749634	KCNK1	3775	-115	CGI	TRUE	FALSE	FALSE
cg25201881	chr1	114695527	114695528	SYT6	148281	943	CGI	TRUE	TRUE	FALSE
cg25204440	chr1	209979598	209979599	IRF6	3664	-77	CGI	TRUE	FALSE	FALSE
cg25286333	chr1	6269448	6269449	RNF207	388591	3258	CGI	FALSE	TRUE	FALSE
cg25947945	chr1	201368946	201368947	LAD1	3898	-276	CGI	TRUE	FALSE	FALSE
cg26030770	chr1	36912487	36912488	OSCP1	127700	3597	CGI-N-Shelf	FALSE	TRUE	FALSE
cg26044038	chr1	113261488	113261489	FAM19A3	284467	-1699	CGI-N-Shore	TRUE	FALSE	FALSE
cg26164879	chr1	38599626	38599627	MIR3659	100500801	44722	CGI-N-Shore	FALSE	FALSE	TRUE
cg26220673	chr1	221064700	221064701	HLX	3142	11956	CGI	FALSE	FALSE	TRUE
cg26303165	chr1	228401758	228401759	OBSCN	84033	5896	CGI	TRUE	TRUE	FALSE
cg26422458	chr1	79472452	79472453	ELTD1	64123	41	CGI	TRUE	FALSE	FALSE
cg26816907	chr1	197890812	197890813	LHX9	56956	9176	CGI-S-Shore	FALSE	TRUE	FALSE
cg26875805	chr1	166890429	166890430	TADA1	117143	-44774	CGI	FALSE	TRUE	FALSE
cg26912890	chr1	214724875	214724876	PTPN14	5784	147	CGI	TRUE	FALSE	FALSE
cg26985289	chr1	9884622	9884623	CLSTN1	22883	-71	CGI	TRUE	FALSE	FALSE
cg27176828	chr1	209848550	209848551	G0S2	50486	-118	CGI	TRUE	FALSE	FALSE
cg27510182	chr1	58715553	58715554	OMA1	115209	296891	CGI	FALSE	TRUE	FALSE
cg27549720	chr1	19992167	19992168	HTR6	3362	386	CGI	TRUE	FALSE	FALSE
cg00097146	chr2	45171818	45171819	SIX3	6496	2780	CGI	FALSE	TRUE	FALSE
cg00209038	chr2	48982683	48982684	LHCGR	3973	195	CGI	TRUE	TRUE	FALSE
cg00593536	chr2	139538222	139538223	NXPH2	11249	-410	CGI	TRUE	FALSE	FALSE
cg00619126	chr2	105459775	105459776	LOC100506421	100506421	8157	CGI	FALSE	TRUE	FALSE
cg00765765	chr2	150176791	150176792	LYPD6	130574	-9706	CGI-N-Shore	FALSE	FALSE	TRUE
cg01020413	chr2	66810487	66810488	MEIS1	4211	147954	CGI-S-Shore	FALSE	FALSE	TRUE
cg01102158	chr2	3381484	3381485	TSSC1	7260	167	CGI	TRUE	FALSE	FALSE
cg01128642	chr2	19558808	19558809	OSR1	130497	-435	CGI	TRUE	FALSE	FALSE
cg01308931	chr2	120517826	120517827	PTPN4	5775	618	CGI	TRUE	FALSE	FALSE
cg01315092	chr2	120980375	120980376	TMEM185B	79134	607	CGI	TRUE	FALSE	FALSE
cg01405040	chr2	176964137	176964138	HOXD12	3238	-391	CGI	TRUE	FALSE	FALSE
cg01708273	chr2	176974060	176974061	HOXD11	3237	4809	CGI	FALSE	TRUE	FALSE
cg01789478	chr2	182545485	182545486	NEUROD1	4760	-92	CGI	TRUE	FALSE	FALSE
cg02093176	chr2	3660939	3660940	COLEC11	78989	18301	CGI-S-Shore	FALSE	TRUE	FALSE
cg02111748	chr2	43903650	43903651	LOC728819	728819	-188	CGI	TRUE	TRUE	FALSE
cg02694427	chr2	176964512	176964513	HOXD12	3238	-16	CGI	TRUE	FALSE	FALSE
cg02785604	chr2	131676136	131676137	ARHGEF4	50649	3349	CGI-S-Shore	FALSE	TRUE	FALSE
cg02861056	chr2	68592345	68592346	PLEK	5341	22	Non-CGI	TRUE	FALSE	FALSE
cg03170725	chr2	27498214	27498215	SLC30A3	7781	-25	CGI-N-Shore	TRUE	FALSE	FALSE
cg03181248	chr2	175199670	175199671	SP9	100131390	-149	CGI	TRUE	FALSE	FALSE
cg03263168	chr2	158732716	158732717	ACVR1	90	-341	CGI	TRUE	FALSE	FALSE
cg03326215	chr2	2328391	2328392	LOC730811	730811	5386	Non-CGI	FALSE	TRUE	FALSE
cg03438674	chr2	241372300	241372301	GPC1	2817	-2813	CGI-N-Shelf	FALSE	FALSE	TRUE
cg03450948	chr2	177053274	177053275	HOXD1	3231	-31	CGI	TRUE	TRUE	FALSE
cg03531247	chr2	50573485	50573486	NRXN1	9378	686187	CGI-N-Shore	FALSE	TRUE	FALSE
cg03538480	chr2	8785262	8785263	ID2	3398	-36849	CGI	FALSE	FALSE	TRUE
cg03964958	chr2	176964720	176964721	HOXD12	3238	189	CGI	TRUE	FALSE	FALSE
cg04194947	chr2	177012191	177012192	MIR10B	406903	-2838	CGI	FALSE	FALSE	TRUE
cg04201253	chr2	177022517	177022518	HOXD3	3232	-6286	CGI	FALSE	FALSE	TRUE
cg04202122	chr2	29116540	29116541	WDR43	23160	-991	CGI-N-Shore	TRUE	FALSE	FALSE
cg04415176	chr2	176957842	176957843	HOXD13	3239	309	CGI	TRUE	FALSE	FALSE
cg04864807	chr2	121412139	121412140	GLI2	2736	-81058	CGI	FALSE	FALSE	TRUE
cg05633391	chr2	11052558	11052559	KCNF1	3754	494	CGI	TRUE	FALSE	FALSE
cg05864326	chr2	177030150	177030151	HOXD3	3232	1344	CGI	FALSE	TRUE	FALSE
cg05885936	chr2	132088912	132088913	WTH3DI	150786	32817	CGI	FALSE	TRUE	FALSE
cg06003267	chr2	583872	583873	TMEM18	129787	93565	CGI	FALSE	FALSE	TRUE
cg06360703	chr2	169482790	169482791	MIR4774	100616356	43336	Non-CGI	FALSE	TRUE	FALSE
cg06638795	chr2	42719933	42719934	KCNG3	170850	1302	CGI	TRUE	TRUE	FALSE
cg06674731	chr2	154335014	154335015	RPRM	56475	306	CGI	TRUE	FALSE	FALSE
cg06704122	chr2	119604702	119604703	EN1	2019	1055	CGI	TRUE	FALSE	FALSE
cg06825448	chr2	240884925	240884926	MIR4786	100616417	-2413	CGI	FALSE	FALSE	TRUE
cg06906472	chr2	107502801	107502802	ST6GAL2	84620	760	CGI	TRUE	TRUE	FALSE
cg07078979	chr2	34128696	34128697	MYADML	151325	-175411	CGI	FALSE	FALSE	TRUE
cg07186154	chr2	108603244	108603245	SLC5A7	60482	248	CGI	FALSE	TRUE	FALSE
cg07212778	chr2	119916510	119916511	C1QL2	165257	-38	CGI	TRUE	FALSE	FALSE
cg07323141	chr2	239140169	239140170	LOC151174	151174	147	CGI	TRUE	FALSE	FALSE
cg07536910	chr2	176948105	176948106	EVX2	344191	583	CGI	TRUE	FALSE	FALSE
cg07537917	chr2	241836409	241836410	C2orf54	79919	-835	CGI-S-Shore	TRUE	FALSE	FALSE
cg08012278	chr2	237068350	237068351	GBX2	2637	8300	CGI	FALSE	FALSE	TRUE
cg08077337	chr2	202900063	202900064	FZD7	8324	752	CGI	TRUE	FALSE	FALSE
cg08690859	chr2	200333729	200333730	SATB2-AS1	150538	907	CGI	TRUE	TRUE	FALSE
cg08750504	chr2	172946193	172946194	DLX1	1745	-4013	CGI	FALSE	FALSE	TRUE
cg08786481	chr2	38830091	38830092	HNRPLL	92906	85	CGI	TRUE	FALSE	FALSE
cg08800878	chr2	73152809	73152810	EMX1	2016	8204	CGI	FALSE	TRUE	FALSE
cg08862564	chr2	208395069	208395070	CREB1	1385	452	CGI	FALSE	TRUE	FALSE
cg09132607	chr2	43903582	43903583	LOC728819	728819	-120	CGI	TRUE	TRUE	FALSE
cg09410607	chr2	217237040	217237041	MARCH4	57574	-289	CGI	TRUE	FALSE	FALSE
cg09438147	chr2	210636533	210636534	UNC80	285175	-182	CGI	TRUE	FALSE	FALSE
cg09484039	chr2	183731310	183731311	FRZB	2487	186	CGI	TRUE	FALSE	FALSE
cg09590377	chr2	8597389	8597390	LINC00299	339789	-128839	CGI	FALSE	FALSE	TRUE
cg10168149	chr2	200335558	200335559	SATB2	23314	429	CGI	TRUE	TRUE	FALSE
cg10429608	chr2	238864632	238864633	UBE2F-SCLY	100533179	-10953	CGI	FALSE	FALSE	TRUE
cg10557743	chr2	99552633	99552634	KIAA1211L	343990	49	CGI	TRUE	FALSE	FALSE
cg10848792	chr2	62732892	62732893	TMEM17	200728	29886	CGI	FALSE	TRUE	FALSE
cg10996058	chr2	119915729	119915730	C1QL2	165257	740	CGI	TRUE	FALSE	FALSE
cg11041835	chr2	189156425	189156426	GULP1	51454	28	CGI	TRUE	FALSE	FALSE
cg11274314	chr2	242480504	242480505	BOK	666	-17640	CGI	FALSE	FALSE	TRUE
cg11642891	chr2	3452563	3452564	TRAPPC12	51112	69116	CGI	FALSE	TRUE	FALSE
cg12191096	chr2	74692545	74692546	MOGS	7841	-7	CGI	TRUE	FALSE	FALSE
cg12529868	chr2	61698413	61698414	USP34	9736	-563	CGI	TRUE	FALSE	FALSE
cg12573849	chr2	105470711	105470712	POU3F3	5455	-1256	CGI	TRUE	FALSE	FALSE
cg12912690	chr2	239197457	239197458	PER2	8864	1284	CGI	TRUE	TRUE	FALSE
cg13008631	chr2	227663034	227663035	IRS1	3667	470	CGI	TRUE	FALSE	FALSE
cg13231954	chr2	8724414	8724415	ID2	3398	-97697	CGI	FALSE	FALSE	TRUE
cg13274077	chr2	121334614	121334615	LOC84931	84931	-110688	CGI	FALSE	FALSE	TRUE
cg13316854	chr2	177027856	177027857	HOXD3	3232	-947	CGI	TRUE	FALSE	FALSE
cg13530938	chr2	239140190	239140191	LOC151174	151174	126	CGI	TRUE	FALSE	FALSE
cg13895867	chr2	237076164	237076165	GBX2	2637	486	CGI	TRUE	FALSE	FALSE
cg14005211	chr2	171676925	171676926	GAD1	2571	3724	CGI	FALSE	TRUE	FALSE
cg14273450	chr2	26624934	26624935	CCDC164	92749	149	CGI	TRUE	FALSE	FALSE
cg14323539	chr2	928750	928751	SNTG2	54221	-17802	CGI	FALSE	FALSE	TRUE
cg14383422	chr2	201450962	201450963	AOX1	316	230	CGI	FALSE	TRUE	FALSE
cg14410016	chr2	176986659	176986660	HOXD9	3235	-752	CGI	TRUE	FALSE	FALSE
cg14411266	chr2	40679582	40679583	SLC8A1	6546	59991	CGI	TRUE	TRUE	FALSE
cg14507868	chr2	107503819	107503820	ST6GAL2	84620	-255	CGI	TRUE	FALSE	FALSE
cg14526718	chr2	176932840	176932841	EVX2	344191	15848	CGI	FALSE	FALSE	TRUE
cg14530444	chr2	239432329	239432330	LOC151171	151171	31809	CGI	FALSE	TRUE	FALSE
cg14608581	chr2	70122240	70122241	SNRNP27	11017	1164	CGI-S-Shore	FALSE	TRUE	FALSE
cg14659346	chr2	233246431	233246432	ALPP	250	3082	CGI	FALSE	TRUE	FALSE
cg14715696	chr2	176945122	176945123	EVX2	344191	3566	CGI	FALSE	TRUE	FALSE
cg14755414	chr2	9531144	9531145	ITGB1BP1	9270	32497	CGI	FALSE	TRUE	FALSE
cg14927745	chr2	241562485	241562486	GPR35	2859	17659	CGI	FALSE	TRUE	FALSE
cg15311822	chr2	9144618	9144619	MBOAT2	129642	-741	CGI	TRUE	FALSE	FALSE
cg15319457	chr2	239148132	239148133	HES6	55502	547	CGI	FALSE	TRUE	FALSE
cg15770238	chr2	11822287	11822288	LPIN1	23175	4565	CGI-N-Shore	FALSE	TRUE	FALSE
cg15981851	chr2	236773924	236773925	GBX2	2637	302726	CGI	FALSE	TRUE	FALSE
cg16227748	chr2	232186992	232186993	MIR4777	100616317	-40425	Non-CGI	FALSE	TRUE	FALSE
cg16327883	chr2	112812775	112812776	TMEM87B	84910	-23	CGI	TRUE	FALSE	FALSE
cg16440561	chr2	220312854	220312855	SPEG	10290	13153	CGI	TRUE	TRUE	FALSE
cg16640855	chr2	182543233	182543234	CERKL	375298	2146	CGI	TRUE	TRUE	FALSE
cg16832267	chr2	18060102	18060103	KCNS3	3790	987	CGI	FALSE	TRUE	FALSE
cg16838838	chr2	85641023	85641024	CAPG	822	145	CGI	FALSE	TRUE	FALSE
cg17177632	chr2	131512961	131512962	AMER3	205147	-114	CGI-N-Shore	TRUE	FALSE	FALSE
cg17178336	chr2	219925246	219925247	IHH	3549	-7	CGI	TRUE	FALSE	FALSE
cg17186168	chr2	11810403	11810404	NTSR2	23620	-73	CGI	TRUE	FALSE	FALSE
cg17246140	chr2	43020264	43020265	HAAO	23498	-512	CGI	TRUE	FALSE	FALSE
cg17332338	chr2	38763354	38763355	HNRPLL	92906	66822	CGI	FALSE	FALSE	TRUE
cg17360854	chr2	161224771	161224772	MIR4785	100616364	39620	Non-CGI	FALSE	TRUE	FALSE
cg17851725	chr2	121269372	121269373	LOC84931	84931	-45446	Non-CGI	FALSE	FALSE	TRUE
cg17939889	chr2	240174650	240174651	MIR4269	100423043	-52505	CGI	FALSE	TRUE	FALSE
cg18077971	chr2	223164867	223164868	PAX3	5077	-1151	CGI	TRUE	TRUE	FALSE
cg18182399	chr2	220283175	220283176	DES	1674	75	CGI	TRUE	FALSE	FALSE
cg18206867	chr2	62422351	62422352	B3GNT2	10678	-909	CGI	TRUE	FALSE	FALSE
cg18303215	chr2	44059003	44059004	ABCG5	64240	6999	CGI	TRUE	TRUE	FALSE
cg18406033	chr2	223159869	223159870	CCDC140	151278	-2995	CGI	FALSE	TRUE	FALSE
cg18667659	chr2	99438903	99438904	MGAT4A	11320	-91313	CGI	FALSE	TRUE	FALSE
cg18686665	chr2	629121	629122	TMEM18	129787	48316	CGI	FALSE	FALSE	TRUE
cg18867200	chr2	71116698	71116699	VAX2	25806	-11020	CGI	FALSE	FALSE	TRUE
cg19432688	chr2	1763410	1763411	PXDN	7837	-15118	CGI	FALSE	FALSE	TRUE
cg19504661	chr2	239542427	239542428	LOC151171	151171	-78286	CGI	FALSE	FALSE	TRUE
cg19560692	chr2	20646664	20646665	RHOB	388	-169	CGI	TRUE	FALSE	FALSE
cg19863227	chr2	98280523	98280524	ACTR1B	10120	36	CGI	TRUE	FALSE	FALSE
cg19863760	chr2	74667680	74667681	RTKN	6242	1378	CGI	TRUE	TRUE	FALSE
cg19910796	chr2	131449749	131449750	CYP4F30P	100132708	12125	CGI-N-Shore	TRUE	FALSE	FALSE
cg20042692	chr2	55450874	55450875	RPS27A	6233	-8163	CGI-S-Shore	FALSE	TRUE	FALSE
cg20093808	chr2	9563643	9563644	ITGB1BP1	9270	0	CGI	TRUE	FALSE	FALSE
cg20365074	chr2	189157191	189157192	GULP1	51454	794	CGI	TRUE	TRUE	FALSE
cg20389472	chr2	171568526	171568527	LOC440925	440925	2549	CGI	FALSE	FALSE	TRUE
cg20391058	chr2	2295451	2295452	LOC730811	730811	-27551	CGI	FALSE	TRUE	FALSE
cg20491914	chr2	26915349	26915350	KCNK3	3777	-230	CGI-N-Shore	TRUE	FALSE	FALSE
cg20649017	chr2	176980837	176980838	HOXD10	3236	-653	CGI	TRUE	FALSE	FALSE
cg20691617	chr2	85142974	85142975	TMSB10	9168	10210	CGI	FALSE	FALSE	TRUE
cg20804191	chr2	237076171	237076172	GBX2	2637	479	CGI	TRUE	FALSE	FALSE
cg21122225	chr2	238832508	238832509	UBE2F-SCLY	100533179	-43077	CGI	FALSE	FALSE	TRUE
cg21272465	chr2	239140296	239140297	LOC151174	151174	20	CGI	TRUE	FALSE	FALSE
cg21384492	chr2	241938321	241938322	SNED1	25992	65	CGI	TRUE	FALSE	FALSE
cg21475150	chr2	101618248	101618249	RPL31	6160	-441	CGI-N-Shore	TRUE	FALSE	FALSE
cg21488538	chr2	98964436	98964437	CNGA3	1261	1817	CGI	FALSE	TRUE	FALSE
cg21821308	chr2	9533606	9533607	ITGB1BP1	9270	30035	CGI-S-Shelf	FALSE	TRUE	FALSE
cg21847751	chr2	232379328	232379329	LINC00471	151477	-277	CGI	TRUE	FALSE	FALSE
cg21949333	chr2	230136146	230136147	PID1	55022	-88	CGI	TRUE	FALSE	FALSE
cg22070462	chr2	26395155	26395156	GAREML	150946	-803	CGI	TRUE	FALSE	FALSE
cg22190437	chr2	229045417	229045418	SPHKAP	80309	942	CGI	FALSE	TRUE	FALSE
cg22650617	chr2	71017541	71017542	FIGLA	344018	232	CGI	TRUE	FALSE	FALSE
cg22866015	chr2	133174136	133174137	GPR39	2863	-9	CGI	TRUE	FALSE	FALSE
cg23279522	chr2	66659348	66659349	MEIS1	4211	-3182	CGI	FALSE	FALSE	TRUE
cg23325963	chr2	45160093	45160094	SIX3	6496	-8942	CGI	FALSE	FALSE	TRUE
cg23348270	chr2	176969612	176969613	HOXD11	3237	361	CGI	FALSE	TRUE	FALSE
cg23420260	chr2	177053285	177053286	HOXD1	3231	-20	CGI	TRUE	TRUE	FALSE
cg23547017	chr2	177030171	177030172	HOXD3	3232	1365	CGI	FALSE	TRUE	FALSE
cg23668184	chr2	5836713	5836714	SOX11	6664	3913	CGI	TRUE	FALSE	FALSE
cg23780110	chr2	26045244	26045245	ASXL2	55252	56066	CGI	FALSE	TRUE	FALSE
cg23807890	chr2	228736357	228736358	DAW1	164781	29	CGI	TRUE	FALSE	FALSE
cg23993463	chr2	234847856	234847857	TRPM8	79054	21812	CGI	FALSE	TRUE	FALSE
cg24011073	chr2	11917787	11917788	MIR4262	100422996	59323	CGI	FALSE	TRUE	FALSE
cg24079702	chr2	106015771	106015772	FHL2	2274	39457	CGI	TRUE	TRUE	FALSE
cg24345062	chr2	200334439	200334440	SATB2	23314	1548	CGI	TRUE	TRUE	FALSE
cg24364967	chr2	55450577	55450578	RPS27A	6233	-8460	CGI	FALSE	TRUE	FALSE
cg24603464	chr2	238395852	238395853	MLPH	79083	798	CGI	TRUE	TRUE	FALSE
cg24617723	chr2	187714003	187714004	ZSWIM2	151112	-105	CGI	TRUE	FALSE	FALSE
cg24633978	chr2	176972581	176972582	HOXD11	3237	3330	CGI	TRUE	TRUE	FALSE
cg24673771	chr2	45180267	45180268	SIX3	6496	11229	CGI	FALSE	FALSE	TRUE
cg24887265	chr2	45233528	45233529	SIX2	10736	3012	CGI	FALSE	TRUE	FALSE
cg24923516	chr2	127955156	127955157	CYP27C1	339761	22496	Non-CGI	FALSE	TRUE	FALSE
cg24927800	chr2	220283214	220283215	DES	1674	114	CGI	TRUE	FALSE	FALSE
cg24941797	chr2	241526520	241526521	CAPN10	11132	386	CGI	FALSE	TRUE	FALSE
cg24980657	chr2	150177277	150177278	LYPD6	130574	-9220	CGI	FALSE	FALSE	TRUE
cg25036284	chr2	26402008	26402009	GAREML	150946	6047	CGI	TRUE	TRUE	FALSE
cg25242471	chr2	219738732	219738733	WNT10A	80326	-6521	CGI	FALSE	TRUE	FALSE
cg25942789	chr2	241696788	241696789	KIF1A	547	62935	CGI	FALSE	TRUE	FALSE
cg25953239	chr2	176982342	176982343	HOXD10	3236	849	CGI	FALSE	TRUE	FALSE
cg26012578	chr2	122125185	122125186	TFCP2L1	29842	-82406	Non-CGI	FALSE	TRUE	FALSE
cg26095658	chr2	71017887	71017888	FIGLA	344018	-111	CGI	TRUE	FALSE	FALSE
cg26149275	chr2	176950007	176950008	EVX2	344191	-1316	CGI	TRUE	FALSE	FALSE
cg26153054	chr2	132152814	132152815	LOC389043	389043	-7658	CGI	FALSE	FALSE	TRUE
cg26703456	chr2	226264821	226264822	NYAP2	57624	-779	Non-CGI	TRUE	FALSE	FALSE
cg26855801	chr2	45176983	45176984	SIX3	6496	7945	CGI	FALSE	FALSE	TRUE
cg26983710	chr2	154728202	154728203	GALNT13	114805	-222	CGI	TRUE	FALSE	FALSE
cg27604702	chr2	233793088	233793089	C2orf82	389084	58093	CGI	TRUE	TRUE	FALSE
cg00323305	chr3	24537182	24537183	THRB	7068	-728	CGI	TRUE	FALSE	FALSE
cg00375819	chr3	11033866	11033867	SLC6A1	6529	-552	CGI-N-Shore	TRUE	FALSE	FALSE
cg00656387	chr3	40428638	40428639	ENTPD3	956	-33	CGI-N-Shore	TRUE	FALSE	FALSE
cg00735667	chr3	74663796	74663797	CNTN3	5067	-93452	CGI	FALSE	FALSE	TRUE
cg00813746	chr3	50275558	50275559	GNAI2	2771	11833	CGI	FALSE	TRUE	FALSE
cg00908291	chr3	140771786	140771787	SPSB4	92369	1042	CGI	FALSE	TRUE	FALSE
cg01379240	chr3	138666144	138666145	C3orf72	401089	67	CGI	TRUE	FALSE	FALSE
cg01822130	chr3	96534005	96534006	EPHA6	285220	579	CGI	FALSE	TRUE	FALSE
cg01896761	chr3	13590444	13590445	FBLN2	2199	16619	CGI-N-Shore	TRUE	TRUE	FALSE
cg02202980	chr3	119421868	119421869	MAATS1	89876	0	CGI-S-Shore	TRUE	FALSE	FALSE
cg02221302	chr3	62304629	62304630	PTPRG-AS1	100506994	-6	CGI	TRUE	FALSE	FALSE
cg02930239	chr3	138763670	138763671	PRR23C	389152	62	CGI	TRUE	FALSE	FALSE
cg03540175	chr3	49236946	49236947	CCDC36	339834	1084	CGI	TRUE	TRUE	FALSE
cg03792947	chr3	107244719	107244720	BBX	56987	2935	CGI	FALSE	TRUE	FALSE
cg03881775	chr3	147111135	147111136	ZIC4	84107	13459	CGI	TRUE	TRUE	FALSE
cg03981074	chr3	183959062	183959063	MIR1224	100187716	-129	CGI-N-Shore	TRUE	TRUE	FALSE
cg03986829	chr3	62358234	62358235	FEZF2	55079	954	CGI	TRUE	TRUE	FALSE
cg04222358	chr3	2140256	2140257	CNTN4	152330	-292	CGI	TRUE	FALSE	FALSE
cg04457317	chr3	50567932	50567933	CACNA2D2	9254	-27039	CGI	FALSE	FALSE	TRUE
cg04467162	chr3	128764824	128764825	GP9	2815	-14819	CGI	FALSE	FALSE	TRUE
cg04527018	chr3	126261298	126261299	C3orf22	152065	16458	CGI	FALSE	TRUE	FALSE
cg04562217	chr3	79815718	79815719	ROBO1	6091	1339	CGI	FALSE	TRUE	FALSE
cg04602284	chr3	119422283	119422284	MAATS1	89876	413	CGI	FALSE	TRUE	FALSE
cg04807594	chr3	148415747	148415748	AGTR1	185	88	CGI	TRUE	FALSE	FALSE
cg05142211	chr3	181430485	181430486	SOX2	6657	772	CGI	TRUE	TRUE	FALSE
cg05467012	chr3	12595696	12595697	MKRN2	23609	-2896	CGI	FALSE	FALSE	TRUE
cg05768427	chr3	127634188	127634189	KBTBD12	166348	-128	CGI	TRUE	FALSE	FALSE
cg06150369	chr3	129118661	129118662	RPL32P3	132241	-378	CGI	TRUE	FALSE	FALSE
cg06598836	chr3	2140699	2140700	CNTN4	152330	148	CGI	FALSE	TRUE	FALSE
cg06637517	chr3	52407344	52407345	BAP1	8314	36663	CGI	FALSE	TRUE	FALSE
cg07351192	chr3	5137773	5137774	ARL8B	55207	-26155	CGI	FALSE	FALSE	TRUE
cg07638884	chr3	77088763	77088764	ROBO2	6092	1102117	CGI	TRUE	TRUE	FALSE
cg07693931	chr3	158449734	158449735	RARRES1	5918	539	CGI	FALSE	TRUE	FALSE
cg07755390	chr3	124931736	124931737	SLC12A8	84561	66353	CGI	TRUE	TRUE	FALSE
cg08154107	chr3	183994073	183994074	CAMK2N2	94032	-14821	CGI	TRUE	TRUE	FALSE
cg08421685	chr3	238611	238612	CHL1	10752	331	CGI	TRUE	FALSE	FALSE
cg08668199	chr3	127795571	127795572	SEC61A1	29927	24358	CGI	FALSE	TRUE	FALSE
cg09000779	chr3	136867925	136867926	IL20RB	53833	191217	Non-CGI	FALSE	FALSE	TRUE
cg09024340	chr3	55520476	55520477	WNT5A	7474	853	CGI	FALSE	TRUE	FALSE
cg09805010	chr3	24536077	24536078	THRB	7068	374	CGI	FALSE	TRUE	FALSE
cg10347032	chr3	183543704	183543705	MAP6D1	79929	-310	CGI	TRUE	FALSE	FALSE
cg10545536	chr3	45635693	45635694	LIMD1	8994	-628	CGI	TRUE	FALSE	FALSE
cg10748086	chr3	13009316	13009317	IQSEC1	9922	105299	CGI	TRUE	TRUE	FALSE
cg11235498	chr3	140771656	140771657	SPSB4	92369	912	CGI	FALSE	TRUE	FALSE
cg11325267	chr3	137480853	137480854	SOX14	8403	-2279	CGI	FALSE	FALSE	TRUE
cg11603443	chr3	58572520	58572521	FAM107A	11170	40815	CGI	FALSE	TRUE	FALSE
cg11830761	chr3	126007485	126007486	KLF15	28999	68749	CGI	FALSE	FALSE	TRUE
cg12065366	chr3	238618	238619	CHL1	10752	338	CGI	TRUE	FALSE	FALSE
cg12121643	chr3	185911796	185911797	ETV5	2119	-84894	CGI	FALSE	TRUE	FALSE
cg12468774	chr3	49236860	49236861	CCDC36	339834	998	CGI	TRUE	TRUE	FALSE
cg12798564	chr3	75263641	75263642	FAM86DP	692099	220623	CGI-N-Shore	FALSE	FALSE	TRUE
cg12934382	chr3	51741135	51741136	GRM2	2912	53	CGI	TRUE	FALSE	FALSE
cg13056927	chr3	42727915	42727916	KLHL40	131377	903	CGI	TRUE	FALSE	FALSE
cg13153394	chr3	45209196	45209197	CDCP1	64866	-21281	Non-CGI	FALSE	FALSE	TRUE
cg13331200	chr3	85008587	85008588	CADM2	253559	453	CGI	TRUE	FALSE	FALSE
cg14051544	chr3	170303286	170303287	SLC7A14	57709	575	CGI	FALSE	TRUE	FALSE
cg14054013	chr3	49894103	49894104	TRAIP	10293	-110	CGI	TRUE	FALSE	FALSE
cg14098532	chr3	111717874	111717875	TAGLN3	29114	287	CGI-N-Shore	TRUE	FALSE	FALSE
cg14310703	chr3	126006903	126006904	KLF15	28999	69331	CGI	FALSE	FALSE	TRUE
cg14557185	chr3	149374763	149374764	WWTR1-AS1	100128025	-1232	CGI	TRUE	TRUE	FALSE
cg14611399	chr3	87138203	87138204	VGLL3	389136	-97945	CGI	TRUE	FALSE	FALSE
cg14750948	chr3	147130477	147130478	ZIC1	7545	3295	CGI	FALSE	TRUE	FALSE
cg15037661	chr3	23986935	23986936	NR1D2	9975	183	CGI	TRUE	TRUE	FALSE
cg15105326	chr3	147108916	147108917	ZIC4	84107	15678	CGI	FALSE	TRUE	FALSE
cg15106134	chr3	181428466	181428467	SOX2	6657	-1244	CGI	TRUE	TRUE	FALSE
cg15593298	chr3	142681996	142681997	PAQR9	344838	180	CGI	TRUE	FALSE	FALSE
cg16225429	chr3	50365552	50365553	TUSC2	11334	114	CGI	TRUE	FALSE	FALSE
cg16240162	chr3	147106890	147106891	ZIC4	84107	17704	CGI-S-Shore	FALSE	TRUE	FALSE
cg16276063	chr3	181421703	181421704	SOX2	6657	-8007	CGI	FALSE	TRUE	FALSE
cg16436210	chr3	16705740	16705741	DAZL	1618	-58733	Non-CGI	FALSE	FALSE	TRUE
cg16468914	chr3	50242735	50242736	SLC38A3	10991	42	CGI	TRUE	FALSE	FALSE
cg16619395	chr3	154145868	154145869	GPR149	344758	1634	CGI	FALSE	TRUE	FALSE
cg16768018	chr3	147108843	147108844	ZIC4	84107	15751	CGI	FALSE	TRUE	FALSE
cg16771578	chr3	125899895	125899896	ALDH1L1	10840	-409	CGI	TRUE	TRUE	FALSE
cg16817826	chr3	62356323	62356324	FEZF2	55079	2865	CGI	FALSE	TRUE	FALSE
cg16927040	chr3	187388128	187388129	SST	6750	71	CGI	TRUE	FALSE	FALSE
cg17280346	chr3	147126703	147126704	ZIC1	7545	-476	CGI	TRUE	FALSE	FALSE
cg17293936	chr3	185911519	185911520	ETV5	2119	-84617	CGI	FALSE	TRUE	FALSE
cg18115215	chr3	132757090	132757091	TMEM108	66000	-79	CGI	TRUE	FALSE	FALSE
cg18172135	chr3	185912486	185912487	ETV5	2119	-85584	CGI-S-Shore	FALSE	TRUE	FALSE
cg18252903	chr3	147072643	147072644	ZIC4	84107	51951	CGI	FALSE	FALSE	TRUE
cg18337222	chr3	99595254	99595255	CMSS1	84319	58575	CGI	TRUE	TRUE	FALSE
cg19029181	chr3	147130536	147130537	ZIC1	7545	3354	CGI	FALSE	TRUE	FALSE
cg19547144	chr3	129147553	129147554	EFCAB12	90288	-58	CGI	TRUE	FALSE	FALSE
cg19815327	chr3	32023353	32023354	OSBPL10	114884	-10	CGI	TRUE	FALSE	FALSE
cg20953187	chr3	45837898	45837899	SLC6A20	54716	135	CGI	TRUE	FALSE	FALSE
cg20985755	chr3	24536474	24536475	THRB	7068	-20	CGI	TRUE	FALSE	FALSE
cg21197774	chr3	192126742	192126743	FGF12	2257	318644	CGI	TRUE	TRUE	FALSE
cg21496658	chr3	154797677	154797678	MME	4311	55763	CGI	TRUE	TRUE	FALSE
cg21741562	chr3	87138387	87138388	VGLL3	389136	-98129	CGI	TRUE	FALSE	FALSE
cg22092811	chr3	99595145	99595146	CMSS1	84319	58466	CGI	TRUE	TRUE	FALSE
cg22816651	chr3	47554949	47554950	ELP6	54859	248	CGI	FALSE	TRUE	FALSE
cg23087992	chr3	181430208	181430209	SOX2	6657	495	CGI	TRUE	TRUE	FALSE
cg23500122	chr3	172167610	172167611	GHSR	2693	-1363	CGI	TRUE	FALSE	FALSE
cg24072474	chr3	140770013	140770014	SPSB4	92369	-728	CGI	TRUE	FALSE	FALSE
cg24082730	chr3	126076366	126076367	KLF15	28999	-129	CGI	TRUE	FALSE	FALSE
cg24620761	chr3	147123199	147123200	ZIC4	84107	1395	CGI-N-Shore	TRUE	TRUE	FALSE
cg24632247	chr3	35680890	35680891	ARPP21	10777	-189	CGI	TRUE	FALSE	FALSE
cg24847685	chr3	147087653	147087654	ZIC4	84107	36941	CGI	FALSE	FALSE	TRUE
cg24940967	chr3	45837197	45837198	SLC6A20	54716	836	CGI-N-Shore	FALSE	TRUE	FALSE
cg24945701	chr3	62362783	62362784	FEZF2	55079	-3592	CGI	FALSE	FALSE	TRUE
cg24971036	chr3	125093764	125093765	ZNF148	7707	432	CGI	FALSE	TRUE	FALSE
cg25347958	chr3	166834160	166834161	ZBBX	79740	263923	Non-CGI	FALSE	FALSE	TRUE
cg25645064	chr3	147096130	147096131	ZIC4	84107	28464	CGI-N-Shelf	FALSE	FALSE	TRUE
cg27014380	chr3	133393454	133393455	TOPBP1	11073	-12716	CGI	FALSE	FALSE	TRUE
cg27237834	chr3	132165326	132165327	DNAJC13	23317	28772	Non-CGI	FALSE	TRUE	FALSE
cg27326062	chr3	109115422	109115423	FLJ25363	401082	-13413	CGI	FALSE	FALSE	TRUE
cg00316839	chr4	85414135	85414136	NKX6-1	4825	5250	CGI	FALSE	FALSE	TRUE
cg00349895	chr4	154073501	154073502	TRIM2	23321	-767	CGI	TRUE	FALSE	FALSE
cg00663077	chr4	188916709	188916710	ZFP42	132625	-214	CGI	TRUE	FALSE	FALSE
cg00699993	chr4	158141570	158141571	GRIA2	2891	274	CGI	TRUE	TRUE	FALSE
cg00740803	chr4	113143664	113143665	AP1AR	55435	-9229	CGI	FALSE	FALSE	TRUE
cg00906130	chr4	175443797	175443798	HPGD	3248	245	CGI	TRUE	FALSE	FALSE
cg01281776	chr4	20253595	20253596	SLIT2	9353	-1638	CGI	TRUE	FALSE	FALSE
cg02044219	chr4	25032562	25032563	LGI2	55203	-147	CGI	TRUE	FALSE	FALSE
cg02108033	chr4	17783294	17783295	FAM184B	27146	-158	CGI	TRUE	FALSE	FALSE
cg02348751	chr4	183064035	183064036	TENM3	55714	-1103	CGI	TRUE	TRUE	FALSE
cg02650266	chr4	147558239	147558240	POU4F2	5458	-1804	CGI	TRUE	FALSE	FALSE
cg02759110	chr4	141489859	141489860	UCP1	7350	98	CGI	TRUE	FALSE	FALSE
cg02829845	chr4	188963260	188963261	ZFP42	132625	46334	CGI	FALSE	FALSE	TRUE
cg03112087	chr4	142053720	142053721	RNF150	57484	894	CGI	TRUE	FALSE	FALSE
cg03184290	chr4	111550666	111550667	PITX2	5308	12611	CGI	FALSE	TRUE	FALSE
cg03248158	chr4	122632918	122632919	ANXA5	308	-14770	Non-CGI	FALSE	FALSE	TRUE
cg03313172	chr4	47033197	47033198	GABRB1	2560	-96	CGI-N-Shore	TRUE	FALSE	FALSE
cg04026169	chr4	85422265	85422266	NKX6-1	4825	-2877	CGI-S-Shore	FALSE	FALSE	TRUE
cg04085768	chr4	113333052	113333053	NEUROG2	63973	104274	CGI	TRUE	TRUE	FALSE
cg04190870	chr4	115519516	115519517	UGT8	7368	-93	CGI	TRUE	FALSE	FALSE
cg04643145	chr4	94753403	94753404	ATOH1	474	3324	CGI	FALSE	FALSE	TRUE
cg04643822	chr4	82965250	82965251	HNRNPD	3184	329897	CGI	FALSE	FALSE	TRUE
cg04997045	chr4	1240068	1240069	CTBP1	1487	2838	CGI	FALSE	TRUE	FALSE
cg05376754	chr4	3825845	3825846	ADRA2C	152	57548	CGI	FALSE	FALSE	TRUE
cg05961809	chr4	154710523	154710524	SFRP2	6423	-294	CGI	TRUE	FALSE	FALSE
cg06132727	chr4	174422191	174422192	HAND2	9464	29185	CGI	FALSE	FALSE	TRUE
cg06424065	chr4	6247640	6247641	WFS1	7466	-23935	CGI	FALSE	FALSE	TRUE
cg06544643	chr4	140036662	140036663	ELF2	1998	23987	CGI-S-Shore	FALSE	TRUE	FALSE
cg06821199	chr4	779230	779231	LOC100129917	100129917	-3593	CGI	FALSE	TRUE	FALSE
cg07080653	chr4	54374249	54374250	PDGFRA	5156	130428	Non-CGI	FALSE	TRUE	FALSE
cg07108441	chr4	186508724	186508725	PDLIM3	27295	-52011	CGI	FALSE	TRUE	FALSE
cg07171111	chr4	10462903	10462904	ZNF518B	85460	-3870	CGI	FALSE	FALSE	TRUE
cg07242805	chr4	2264197	2264198	MXD4	10608	-457	CGI	TRUE	FALSE	FALSE
cg07467562	chr4	135248622	135248623	PABPC4L	132430	-125718	CGI	TRUE	FALSE	FALSE
cg07536144	chr4	26030582	26030583	C4orf52	389203	114767	CGI	FALSE	FALSE	TRUE
cg07837556	chr4	118006750	118006751	TRAM1L1	133022	-13	CGI	TRUE	FALSE	FALSE
cg07976816	chr4	6883843	6883844	TBC1D14	57533	-27326	CGI-N-Shore	FALSE	TRUE	FALSE
cg08712866	chr4	157997526	157997527	GLRB	2743	248	CGI	TRUE	TRUE	FALSE
cg08718490	chr4	52943099	52943100	SPATA18	132671	25505	CGI	FALSE	TRUE	FALSE
cg08775137	chr4	41880319	41880320	TMEM33	55161	-56816	CGI	FALSE	FALSE	TRUE
cg08812889	chr4	174439925	174439926	HAND2	9464	11451	CGI	FALSE	FALSE	TRUE
cg09082903	chr4	164253207	164253208	NPY1R	4886	738	CGI	FALSE	TRUE	FALSE
cg09111223	chr4	93225086	93225087	GRID2	2895	-462	CGI	TRUE	FALSE	FALSE
cg09112514	chr4	55096230	55096231	GSX2	170825	129981	CGI	FALSE	TRUE	FALSE
cg09157302	chr4	25656830	25656831	SLC34A2	10568	-603	CGI-N-Shore	TRUE	FALSE	FALSE
cg09333785	chr4	8202491	8202492	SH3TC1	54436	1430	CGI	FALSE	TRUE	FALSE
cg09344644	chr4	2757922	2757923	TNIP2	79155	179	CGI	TRUE	FALSE	FALSE
cg09795809	chr4	183062729	183062730	TENM3	55714	-2409	CGI	FALSE	TRUE	FALSE
cg09796800	chr4	128651518	128651519	SLC25A31	83447	-35	CGI	TRUE	FALSE	FALSE
cg09986292	chr4	13525605	13525606	LOC285547	285547	7434	CGI	FALSE	FALSE	TRUE
cg10192893	chr4	41747895	41747896	PHOX2B	8929	3090	CGI	FALSE	TRUE	FALSE
cg10503298	chr4	1217221	1217222	LOC100130872	100130872	-14470	CGI-S-Shore	FALSE	TRUE	FALSE
cg10683341	chr4	39639289	39639290	SMIM14	201895	1190	CGI	TRUE	TRUE	FALSE
cg10740902	chr4	55991683	55991684	KDR	3791	77	CGI	TRUE	FALSE	FALSE
cg10755899	chr4	1772151	1772152	FGFR3	2261	-22886	CGI	FALSE	FALSE	TRUE
cg11416384	chr4	37246827	37246828	KIAA1239	57495	136	CGI	TRUE	FALSE	FALSE
cg11505338	chr4	55991850	55991851	KDR	3791	-87	CGI	TRUE	FALSE	FALSE
cg11723848	chr4	96470286	96470287	UNC5C	8633	73	CGI	TRUE	FALSE	FALSE
cg11777917	chr4	1804816	1804817	FGFR3	2261	9776	CGI	FALSE	TRUE	FALSE
cg11969330	chr4	187125413	187125414	CYP4V2	285440	12738	CGI	TRUE	TRUE	FALSE
cg13074295	chr4	3749413	3749414	ADRA2C	152	-18881	CGI	FALSE	FALSE	TRUE
cg13139972	chr4	107957430	107957431	DKK2	27123	247414	CGI	TRUE	TRUE	FALSE
cg13184723	chr4	16228062	16228063	TAPT1	202018	97	CGI	TRUE	FALSE	FALSE
cg13184823	chr4	187476599	187476600	MTNR1A	4543	-61	CGI	TRUE	FALSE	FALSE
cg13321967	chr4	53617679	53617680	ERVMER34-1	100288413	126	CGI	TRUE	FALSE	FALSE
cg14349667	chr4	81189706	81189707	FGF5	2250	1963	CGI-S-Shore	FALSE	TRUE	FALSE
cg14817655	chr4	188916724	188916725	ZFP42	132625	-199	CGI	TRUE	FALSE	FALSE
cg14832317	chr4	13526597	13526598	LOC285547	285547	6442	CGI	FALSE	FALSE	TRUE
cg14866200	chr4	42399843	42399844	SHISA3	152573	-11	CGI	TRUE	FALSE	FALSE
cg15543566	chr4	87515467	87515468	PTPN13	5783	0	CGI	TRUE	FALSE	FALSE
cg15854548	chr4	4643278	4643279	LOC100507266	100507266	99419	Non-CGI	FALSE	TRUE	FALSE
cg16026922	chr4	41259044	41259045	UCHL1	7345	145	CGI	FALSE	TRUE	FALSE
cg16792066	chr4	185570396	185570397	CASP3	836	231	CGI	TRUE	TRUE	FALSE
cg17187287	chr4	115519593	115519594	UGT8	7368	-16	CGI	TRUE	FALSE	FALSE
cg17214381	chr4	188916668	188916669	ZFP42	132625	-255	CGI	TRUE	FALSE	FALSE
cg17275700	chr4	91049007	91049008	CCSER1	401145	322	CGI	FALSE	TRUE	FALSE
cg17631454	chr4	49308567	49308568	CWH43	80157	320301	CGI-N-Shore	FALSE	FALSE	TRUE
cg18132212	chr4	40751843	40751844	NSUN7	79730	-69	CGI	TRUE	FALSE	FALSE
cg18347642	chr4	21950766	21950767	KCNIP4	80333	-391	CGI	TRUE	FALSE	FALSE
cg18515868	chr4	1304836	1304837	MAEA	10296	21163	CGI	FALSE	TRUE	FALSE
cg19170015	chr4	74734714	74734715	CXCL1	2919	-393	CGI-N-Shore	TRUE	FALSE	FALSE
cg19739468	chr4	1986914	1986915	MIR943	100126332	1288	CGI	FALSE	TRUE	FALSE
cg19759671	chr4	183063459	183063460	TENM3	55714	-1679	CGI	TRUE	TRUE	FALSE
cg19908812	chr4	164253006	164253007	NPY1R	4886	939	CGI	FALSE	TRUE	FALSE
cg19936614	chr4	187627811	187627812	FAT1	2195	20037	CGI-N-Shore	FALSE	TRUE	FALSE
cg19955849	chr4	140095286	140095287	ELF2	1998	-34634	CGI-N-Shelf	FALSE	FALSE	TRUE
cg20125971	chr4	56458333	56458334	PDCL2	132954	44	CGI	TRUE	FALSE	FALSE
cg20332645	chr4	1400869	1400870	CRIPAK	285464	15528	CGI	FALSE	FALSE	TRUE
cg20699200	chr4	6675674	6675675	LOC93622	93622	-145	CGI	TRUE	FALSE	FALSE
cg20964594	chr4	8594324	8594325	CPZ	8532	12106	CGI-N-Shore	TRUE	TRUE	FALSE
cg20978694	chr4	2061804	2061805	NAT8L	339983	564	CGI	FALSE	TRUE	FALSE
cg21013745	chr4	7512425	7512426	MIR4274	100422826	50669	CGI	FALSE	TRUE	FALSE
cg21108841	chr4	24914750	24914751	CCDC149	91050	67074	CGI	TRUE	TRUE	FALSE
cg21329599	chr4	7194519	7194520	SORCS2	57537	144	CGI	TRUE	FALSE	FALSE
cg21722242	chr4	2464050	2464051	RNF4	6047	-6743	CGI	FALSE	TRUE	FALSE
cg21782409	chr4	96470887	96470888	UNC5C	8633	-525	CGI	TRUE	FALSE	FALSE
cg23300732	chr4	5053496	5053497	STK32B	55351	-29	CGI	TRUE	FALSE	FALSE
cg23690302	chr4	190276895	190276896	HSP90AA4P	3323	-117402	CGI	FALSE	FALSE	TRUE
cg23713724	chr4	21306051	21306052	KCNIP4-IT1	359822	548758	CGI	TRUE	TRUE	FALSE
cg23806894	chr4	111535528	111535529	PITX2	5308	27749	CGI	FALSE	FALSE	TRUE
cg23893620	chr4	20884385	20884386	PACRGL	133015	186479	Non-CGI	TRUE	TRUE	FALSE
cg23939001	chr4	940644	940645	TMEM175	84286	14381	CGI-S-Shore	FALSE	TRUE	FALSE
cg24183909	chr4	118006747	118006748	TRAM1L1	133022	-10	CGI	TRUE	FALSE	FALSE
cg24269412	chr4	1340602	1340603	UVSSA	57654	-500	CGI	TRUE	FALSE	FALSE
cg24395452	chr4	52943197	52943198	SPATA18	132671	25603	CGI	FALSE	TRUE	FALSE
cg24693053	chr4	682834	682835	MFSD7	84179	137	CGI	TRUE	FALSE	FALSE
cg24721899	chr4	13543985	13543986	NKX3-2	579	2127	CGI	FALSE	TRUE	FALSE
cg24978835	chr4	76912244	76912245	SDAD1	55153	-130	CGI	TRUE	FALSE	FALSE
cg24980653	chr4	1399235	1399236	CRIPAK	285464	13894	CGI-S-Shore	FALSE	FALSE	TRUE
cg25107254	chr4	187476455	187476456	MTNR1A	4543	80	CGI	TRUE	FALSE	FALSE
cg25174438	chr4	85403915	85403916	NKX6-1	4825	15470	CGI	FALSE	FALSE	TRUE
cg25262044	chr4	107958491	107958492	DKK2	27123	246353	CGI	TRUE	TRUE	FALSE
cg25444386	chr4	55990944	55990945	KDR	3791	816	CGI	FALSE	TRUE	FALSE
cg26306909	chr4	37455485	37455486	C4orf19	55286	-65	CGI	TRUE	FALSE	FALSE
cg26675664	chr4	1408936	1408937	CRIPAK	285464	23595	CGI	FALSE	FALSE	TRUE
cg26695837	chr4	37688098	37688099	RELL1	768211	-98	CGI	TRUE	FALSE	FALSE
cg26775961	chr4	71553999	71554000	UTP3	57050	-195	CGI	TRUE	FALSE	FALSE
cg26814276	chr4	172734266	172734267	GALNTL6	442117	-307	CGI	TRUE	FALSE	FALSE
cg26831119	chr4	111550830	111550831	PITX2	5308	12447	CGI	FALSE	TRUE	FALSE
cg26860935	chr4	1407989	1407990	CRIPAK	285464	22648	CGI-S-Shore	FALSE	FALSE	TRUE
cg27475132	chr4	187645120	187645121	FAT1	2195	2728	CGI	TRUE	TRUE	FALSE
cg00332937	chr5	72740460	72740461	BTF3	689	-53788	CGI	FALSE	FALSE	TRUE
cg00574530	chr5	134872064	134872065	NEUROG1	4762	-424	CGI	TRUE	FALSE	FALSE
cg00642460	chr5	176827697	176827698	PFN3	345456	-59	CGI	TRUE	FALSE	FALSE
cg01474424	chr5	155754231	155754232	PPP1R2P3	153743	-523316	Non-CGI	TRUE	TRUE	FALSE
cg01587896	chr5	50678925	50678926	ISL1	3670	-31	CGI	TRUE	FALSE	FALSE
cg01781963	chr5	61028748	61028749	C5orf64	285668	95111	CGI	FALSE	TRUE	FALSE
cg01995468	chr5	176544135	176544136	NSD1	64324	-15943	CGI	FALSE	FALSE	TRUE
cg02004641	chr5	140306181	140306182	PCDHAC1	56135	-119	CGI	TRUE	TRUE	FALSE
cg02010196	chr5	146889275	146889276	DPYSL3	1809	342	CGI	TRUE	FALSE	FALSE
cg02037307	chr5	134363562	134363563	PITX1	5307	6400	CGI	FALSE	TRUE	FALSE
cg02074191	chr5	140779461	140779462	PCDHGB5	56101	1765	CGI	TRUE	TRUE	FALSE
cg02081006	chr5	122430434	122430435	PRDM6	93166	5592	CGI	FALSE	TRUE	FALSE
cg02162286	chr5	5887361	5887362	FLJ33360	401172	450042	CGI	FALSE	FALSE	TRUE
cg02265379	chr5	87898506	87898507	MIR9-2	407047	64249	CGI-N-Shore	FALSE	TRUE	FALSE
cg02452944	chr5	140810109	140810110	PCDHGA12	26025	-47	CGI-N-Shore	TRUE	TRUE	FALSE
cg02549492	chr5	95066568	95066569	RHOBTB3	22836	13230	CGI-N-Shore	TRUE	TRUE	FALSE
cg02707176	chr5	140798758	140798759	PCDHGB7	56099	1543	CGI	TRUE	TRUE	FALSE
cg03318614	chr5	140174612	140174613	PCDHA2	56146	167	CGI	TRUE	TRUE	FALSE
cg03323696	chr5	59189120	59189121	PART1	25859	-594418	CGI	TRUE	TRUE	FALSE
cg04223420	chr5	134363877	134363878	PITX1	5307	6085	CGI	FALSE	TRUE	FALSE
cg04248271	chr5	158524404	158524405	EBF1	1879	2382	CGI	TRUE	TRUE	FALSE
cg04306069	chr5	98175255	98175256	FLJ35946	503569	-66466	CGI-N-Shore	FALSE	FALSE	TRUE
cg04518342	chr5	131593106	131593107	PDLIM4	8572	-243	CGI	TRUE	TRUE	FALSE
cg04541368	chr5	92909429	92909430	FLJ42709	441094	7572	CGI-S-Shore	FALSE	TRUE	FALSE
cg04652536	chr5	99381840	99381841	LOC100133050	100133050	342116	CGI	TRUE	FALSE	FALSE
cg04693014	chr5	180645302	180645303	MIR4638	100616342	4329	CGI	TRUE	FALSE	FALSE
cg04992127	chr5	2751854	2751855	IRX2	153572	-84	CGI-S-Shore	TRUE	FALSE	FALSE
cg05016408	chr5	150326174	150326175	ZNF300P1	134466	-27	CGI	TRUE	FALSE	FALSE
cg05201970	chr5	45696206	45696207	HCN1	348980	12	CGI	TRUE	FALSE	FALSE
cg05656566	chr5	178593924	178593925	ZNF354C	30832	106316	CGI	FALSE	TRUE	FALSE
cg05686497	chr5	127874587	127874588	FBN2	2201	-670	CGI	TRUE	FALSE	FALSE
cg05904966	chr5	7851031	7851032	C5orf49	134121	231	CGI	TRUE	FALSE	FALSE
cg06183338	chr5	178004204	178004205	COL23A1	91522	13350	CGI	FALSE	TRUE	FALSE
cg06585708	chr5	3602413	3602414	IRX1	79192	6244	CGI	FALSE	FALSE	TRUE
cg06781712	chr5	19988288	19988289	CDH18	1016	587692	CGI-N-Shore	TRUE	TRUE	FALSE
cg06850283	chr5	44389769	44389770	FGF10	2255	-984	CGI	TRUE	FALSE	FALSE
cg06904356	chr5	1849983	1849984	IRX4	50805	32895	CGI-N-Shore	FALSE	FALSE	TRUE
cg06918474	chr5	126205081	126205082	LMNB1	4001	92765	CGI	FALSE	TRUE	FALSE
cg07039560	chr5	140683681	140683682	SLC25A2	83884	-68	CGI	TRUE	FALSE	FALSE
cg07167946	chr5	1878205	1878206	IRX4	50805	4673	CGI	FALSE	TRUE	FALSE
cg07270078	chr5	50678712	50678713	ISL1	3670	-244	CGI	TRUE	FALSE	FALSE
cg07360792	chr5	122425702	122425703	PRDM6	93166	860	CGI	TRUE	TRUE	FALSE
cg07432626	chr5	146889536	146889537	DPYSL3	1809	81	CGI	TRUE	FALSE	FALSE
cg07442479	chr5	37839769	37839770	GDNF	2668	11	CGI	TRUE	FALSE	FALSE
cg07565505	chr5	1887300	1887301	IRX4	50805	-4419	CGI	FALSE	FALSE	TRUE
cg07595776	chr5	77253990	77253991	TBCA	6902	-181804	CGI	FALSE	FALSE	TRUE
cg07747251	chr5	1868357	1868358	IRX4	50805	14521	CGI	FALSE	FALSE	TRUE
cg07752120	chr5	70746259	70746260	BDP1	55814	-5181	Non-CGI	FALSE	FALSE	TRUE
cg07834743	chr5	5139610	5139611	ADAMTS16	170690	-831	CGI	TRUE	FALSE	FALSE
cg08235864	chr5	2751822	2751823	IRX2	153572	-52	CGI-S-Shore	TRUE	FALSE	FALSE
cg08239858	chr5	2739131	2739132	IRX2	153572	12636	CGI	FALSE	FALSE	TRUE
cg08513100	chr5	133706722	133706723	CDKL3	51265	11	CGI-N-Shore	TRUE	FALSE	FALSE
cg08609839	chr5	1380611	1380612	CLPTM1L	81037	-35608	CGI	TRUE	FALSE	FALSE
cg08717980	chr5	1386005	1386006	CLPTM1L	81037	-41002	CGI	FALSE	FALSE	TRUE
cg08840551	chr5	56718349	56718350	ACTBL2	345651	60285	CGI	FALSE	FALSE	TRUE
cg08957484	chr5	132083532	132083533	CCNI2	645121	394	CGI	TRUE	FALSE	FALSE
cg09088988	chr5	146614298	146614299	STK32A	202374	-279	CGI	TRUE	FALSE	FALSE
cg09639151	chr5	140810920	140810921	PCDHGA12	26025	761	CGI	TRUE	TRUE	FALSE
cg09693432	chr5	7851280	7851281	C5orf49	134121	-15	CGI	TRUE	FALSE	FALSE
cg10453230	chr5	174148198	174148199	MSX2	4488	-3375	CGI	FALSE	FALSE	TRUE
cg10530883	chr5	3596207	3596208	IRX1	79192	38	CGI	TRUE	FALSE	FALSE
cg10666364	chr5	179125825	179125826	CANX	821	396	CGI	TRUE	TRUE	FALSE
cg11206381	chr5	158737792	158737793	IL12B	3593	19687	CGI	FALSE	FALSE	TRUE
cg11284842	chr5	92931817	92931818	NR2F1	7025	12773	CGI	FALSE	FALSE	TRUE
cg11354603	chr5	4230769	4230770	IRX1	79192	634600	CGI	FALSE	FALSE	TRUE
cg11452391	chr5	16180315	16180316	MARCH11	441061	-417	CGI	TRUE	FALSE	FALSE
cg11560600	chr5	121462562	121462563	ZNF474	133923	-2651	Non-CGI	FALSE	FALSE	TRUE
cg11606461	chr5	112629604	112629605	TSSK1B	83942	141122	CGI	FALSE	TRUE	FALSE
cg11624524	chr5	172097289	172097290	NEURL1B	54492	29012	CGI	FALSE	TRUE	FALSE
cg11711420	chr5	50679290	50679291	ISL1	3670	331	CGI	TRUE	FALSE	FALSE
cg11830096	chr5	140865433	140865434	PCDHGC4	56098	691	CGI	TRUE	TRUE	FALSE
cg11843238	chr5	131593191	131593192	PDLIM4	8572	-158	CGI	TRUE	TRUE	FALSE
cg11954680	chr5	140254793	140254794	PCDHA12	56137	-136	CGI-N-Shore	TRUE	TRUE	FALSE
cg12180613	chr5	132158560	132158561	SHROOM1	134549	8028	CGI-N-Shore	FALSE	TRUE	FALSE
cg12193929	chr5	140237485	140237486	PCDHA10	56139	1850	CGI	TRUE	TRUE	FALSE
cg12317217	chr5	140203603	140203604	PCDHA5	56143	2241	CGI-S-Shore	TRUE	TRUE	FALSE
cg12325536	chr5	87968658	87968659	MIR9-2	407047	-5900	CGI	FALSE	TRUE	FALSE
cg12487540	chr5	140734931	140734932	PCDHGA4	56111	162	CGI	TRUE	TRUE	FALSE
cg12940822	chr5	127873397	127873398	FBN2	2201	517	CGI	TRUE	FALSE	FALSE
cg12995800	chr5	151304312	151304313	GLRA1	2741	83	CGI	TRUE	FALSE	FALSE
cg13904970	chr5	123987667	123987668	ZNF608	57507	96831	CGI	FALSE	TRUE	FALSE
cg14451382	chr5	1876397	1876398	IRX4	50805	6481	CGI	FALSE	FALSE	TRUE
cg14477868	chr5	92938260	92938261	MIR2277	100313887	18232	CGI	FALSE	FALSE	TRUE
cg14502484	chr5	1446208	1446209	SLC6A3	6531	-664	CGI	TRUE	FALSE	FALSE
cg14560022	chr5	172189315	172189316	DUSP1	1843	8886	CGI-N-Shore	FALSE	FALSE	TRUE
cg14621323	chr5	176827161	176827162	PFN3	345456	474	CGI	TRUE	FALSE	FALSE
cg14732324	chr5	528621	528622	SLC9A3	6550	-4071	CGI	FALSE	FALSE	TRUE
cg15042995	chr5	156693055	156693056	CYFIP2	26999	-34	CGI	TRUE	FALSE	FALSE
cg15108727	chr5	3104873	3104874	C5orf38	153571	352610	CGI	FALSE	FALSE	TRUE
cg15409013	chr5	5139855	5139856	ADAMTS16	170690	-586	CGI	TRUE	FALSE	FALSE
cg15713707	chr5	169930905	169930906	KCNMB1	3779	-114266	CGI-N-Shore	TRUE	TRUE	FALSE
cg15829642	chr5	140744983	140744984	PCDHGA5	56110	1084	CGI	TRUE	TRUE	FALSE
cg15833158	chr5	20305818	20305819	CDH18	1016	270162	CGI	FALSE	TRUE	FALSE
cg15927720	chr5	168728149	168728150	SLIT3	6586	-15	CGI	TRUE	FALSE	FALSE
cg15949044	chr5	140864549	140864550	PCDHGC4	56098	-190	CGI	TRUE	TRUE	FALSE
cg16027343	chr5	180632948	180632949	TRIM7	81786	-770	CGI	TRUE	FALSE	FALSE
cg16099804	chr5	83680253	83680254	EDIL3	10085	356	CGI	TRUE	FALSE	FALSE
cg16257051	chr5	153862183	153862184	HAND1	9421	-4358	CGI	FALSE	FALSE	TRUE
cg16318053	chr5	50679147	50679148	ISL1	3670	188	CGI	TRUE	FALSE	FALSE
cg16420798	chr5	146614386	146614387	STK32A	202374	-191	CGI	TRUE	FALSE	FALSE
cg16443866	chr5	172756558	172756559	STC2	8614	-51	CGI	TRUE	FALSE	FALSE
cg16485558	chr5	63461566	63461567	RNF180	285671	-103	CGI	TRUE	FALSE	FALSE
cg16512661	chr5	2743620	2743621	IRX2	153572	8147	CGI	FALSE	FALSE	TRUE
cg16527418	chr5	98175367	98175368	FLJ35946	503569	-66578	CGI	FALSE	FALSE	TRUE
cg16703956	chr5	1446217	1446218	SLC6A3	6531	-673	CGI	TRUE	FALSE	FALSE
cg17030055	chr5	24645065	24645066	CDH10	1008	18	Non-CGI	TRUE	FALSE	FALSE
cg17039936	chr5	89769860	89769861	MBLAC2	153364	723	CGI	TRUE	FALSE	FALSE
cg17279652	chr5	180622276	180622277	TRIM7	81786	9899	CGI	FALSE	TRUE	FALSE
cg17329494	chr5	65018961	65018962	NLN	57486	937	CGI-S-Shore	TRUE	TRUE	FALSE
cg17368581	chr5	72512191	72512192	TMEM174	134288	43167	CGI	FALSE	FALSE	TRUE
cg17721879	chr5	158532473	158532474	EBF1	1879	-5684	CGI	FALSE	TRUE	FALSE
cg17840719	chr5	178368253	178368254	ZNF454	285676	58	CGI	TRUE	FALSE	FALSE
cg17996329	chr5	176057427	176057428	SNCB	6620	128	CGI	TRUE	FALSE	FALSE
cg18250028	chr5	71015523	71015524	CARTPT	9607	532	CGI	FALSE	TRUE	FALSE
cg18328894	chr5	175224563	175224564	CPLX2	10814	952	CGI	FALSE	TRUE	FALSE
cg18507379	chr5	140787507	140787508	PCDHGB6	56100	-261	CGI	TRUE	TRUE	FALSE
cg18631996	chr5	139526080	139526081	IGIP	492311	20558	CGI	FALSE	FALSE	TRUE
cg18839637	chr5	140723684	140723685	PCDHGA3	56112	82	CGI	TRUE	TRUE	FALSE
cg18869404	chr5	76937348	76937349	OTP	23440	-2825	CGI	FALSE	FALSE	TRUE
cg19078576	chr5	17217877	17217878	BASP1	10409	126	CGI	TRUE	FALSE	FALSE
cg19437285	chr5	148650972	148650973	AFAP1L1	134265	-427	CGI	TRUE	FALSE	FALSE
cg19503640	chr5	1503763	1503764	LPCAT1	79888	20311	CGI	FALSE	TRUE	FALSE
cg19504702	chr5	153862394	153862395	HAND1	9421	-4569	CGI	FALSE	FALSE	TRUE
cg19581963	chr5	177708528	177708529	AGXT2L2	85007	-48724	CGI	FALSE	TRUE	FALSE
cg19748485	chr5	140743927	140743928	PCDHGA5	56110	28	CGI	TRUE	TRUE	FALSE
cg19806642	chr5	178422140	178422141	GRM6	2916	-15	CGI	TRUE	FALSE	FALSE
cg19978181	chr5	76923988	76923989	OTP	23440	10532	CGI	FALSE	FALSE	TRUE
cg20563910	chr5	174152033	174152034	MSX2	4488	457	CGI	TRUE	FALSE	FALSE
cg20727434	chr5	170740547	170740548	TLX3	30012	4258	CGI	FALSE	FALSE	TRUE
cg21050001	chr5	36662804	36662805	SLC1A3	6507	56346	CGI	FALSE	TRUE	FALSE
cg21545862	chr5	174159294	174159295	MSX2	4488	7718	CGI	FALSE	FALSE	TRUE
cg21627409	chr5	140810106	140810107	PCDHGA12	26025	-50	CGI-N-Shore	TRUE	TRUE	FALSE
cg21800232	chr5	79866368	79866369	ANKRD34B	340120	-63	CGI	TRUE	FALSE	FALSE
cg22139166	chr5	124071107	124071108	ZNF608	57507	13391	Non-CGI	FALSE	TRUE	FALSE
cg22156700	chr5	72732486	72732487	BTF3	689	-61762	CGI	FALSE	FALSE	TRUE
cg22160448	chr5	170734856	170734857	TLX3	30012	-1430	CGI-N-Shore	TRUE	FALSE	FALSE
cg22985016	chr5	497397	497398	PP7080	25845	-24316	CGI-S-Shore	FALSE	TRUE	FALSE
cg22995692	chr5	141263164	141263165	PCDH1	5097	-5219	CGI	FALSE	FALSE	TRUE
cg24585418	chr5	179059426	179059427	HNRNPH1	3187	-7755	CGI	FALSE	FALSE	TRUE
cg24667575	chr5	172097064	172097065	NEURL1B	54492	28787	CGI	FALSE	TRUE	FALSE
cg24908814	chr5	132947725	132947726	FSTL4	23105	496	CGI	FALSE	TRUE	FALSE
cg25090514	chr5	2038743	2038744	IRX4	50805	-155862	CGI	FALSE	FALSE	TRUE
cg25142702	chr5	6378806	6378807	MED10	84246	-166	CGI	TRUE	FALSE	FALSE
cg25449484	chr5	92929372	92929373	NR2F1	7025	10328	CGI	FALSE	TRUE	FALSE
cg25482900	chr5	167956911	167956912	FBLL1	345630	328	CGI	TRUE	FALSE	FALSE
cg25500080	chr5	140346199	140346200	PCDHAC2	56134	451	CGI	TRUE	TRUE	FALSE
cg25645199	chr5	171533681	171533682	STK10	6793	81663	CGI	FALSE	TRUE	FALSE
cg25923609	chr5	3607092	3607093	IRX1	79192	10923	CGI-S-Shore	FALSE	FALSE	TRUE
cg26078977	chr5	59189467	59189468	PART1	25859	-594071	CGI	TRUE	TRUE	FALSE
cg26135573	chr5	179059668	179059669	HNRNPH1	3187	-7997	CGI	FALSE	FALSE	TRUE
cg26195356	chr5	2743601	2743602	IRX2	153572	8166	CGI	FALSE	FALSE	TRUE
cg26301389	chr5	139048106	139048107	CXXC5	51523	19804	CGI	FALSE	TRUE	FALSE
cg26327666	chr5	76937963	76937964	OTP	23440	-3440	CGI-S-Shore	FALSE	FALSE	TRUE
cg26353287	chr5	42954090	42954091	LOC648987	648987	64821	CGI-S-Shore	FALSE	FALSE	TRUE
cg26422488	chr5	16935950	16935951	MYO10	4651	433	CGI	TRUE	FALSE	FALSE
cg26446499	chr5	77253555	77253556	TBCA	6902	-181369	CGI	FALSE	FALSE	TRUE
cg26541920	chr5	524127	524128	SLC9A3	6550	420	CGI	FALSE	TRUE	FALSE
cg26624732	chr5	70746330	70746331	BDP1	55814	-5110	Non-CGI	FALSE	FALSE	TRUE
cg26664161	chr5	135265937	135265938	FBXL21	26223	-67	CGI	TRUE	FALSE	FALSE
cg26789779	chr5	37839943	37839944	GDNF	2668	-160	CGI	TRUE	FALSE	FALSE
cg26817546	chr5	135538704	135538705	LOC389332	389332	-9852	Non-CGI	FALSE	FALSE	TRUE
cg26886462	chr5	155108449	155108450	SGCD	6444	-26612	CGI	FALSE	FALSE	TRUE
cg27090784	chr5	147862681	147862682	FBXO38	81545	99134	CGI-S-Shore	FALSE	TRUE	FALSE
cg27638727	chr5	36066944	36066945	UGT3A2	167127	77	Non-CGI	TRUE	FALSE	FALSE
cg00090619	chr6	33160286	33160287	COL11A2	1302	-40	CGI	TRUE	FALSE	FALSE
cg00355613	chr6	32064956	32064957	TNXB	7148	20513	CGI	FALSE	TRUE	FALSE
cg00364016	chr6	10113648	10113649	LOC100130275	100130275	-298901	Non-CGI	FALSE	TRUE	FALSE
cg00472801	chr6	62995876	62995877	KHDRBS2	202559	222	CGI	TRUE	FALSE	FALSE
cg00525277	chr6	32064239	32064240	TNXB	7148	21230	CGI	FALSE	TRUE	FALSE
cg00613752	chr6	110300308	110300309	GPR6	2830	9	CGI	TRUE	TRUE	FALSE
cg01461410	chr6	85473773	85473774	TBX18	9096	124	CGI	TRUE	FALSE	FALSE
cg02106850	chr6	85474093	85474094	TBX18	9096	-193	CGI	TRUE	FALSE	FALSE
cg02196294	chr6	39197260	39197261	KCNK5	8645	-8	CGI	TRUE	FALSE	FALSE
cg02285791	chr6	27550747	27550748	ZNF184	7738	-109849	CGI	FALSE	FALSE	TRUE
cg02391713	chr6	105400985	105400986	LIN28B	389421	-3936	CGI	FALSE	FALSE	TRUE
cg02526986	chr6	117198743	117198744	RFX6	222546	366	CGI-S-Shore	FALSE	TRUE	FALSE
cg02662362	chr6	33084814	33084815	HLA-DPB2	3116	4520	CGI	FALSE	TRUE	FALSE
cg03024372	chr6	54711476	54711477	FAM83B	222584	-91	CGI	TRUE	FALSE	FALSE
cg03124091	chr6	30640593	30640594	DHX16	8449	235	CGI	TRUE	TRUE	FALSE
cg03198009	chr6	29648604	29648605	ZFP57	346171	-3672	CGI	FALSE	FALSE	TRUE
cg03325733	chr6	146864759	146864760	RAB32	10981	-67	CGI	TRUE	FALSE	FALSE
cg03521696	chr6	29795595	29795596	HLA-H	3136	-16	CGI	TRUE	TRUE	FALSE
cg04600618	chr6	43612980	43612981	RSPH9	221421	212	CGI	TRUE	FALSE	FALSE
cg04623837	chr6	29943414	29943415	HCG9	10255	521	CGI	FALSE	TRUE	FALSE
cg04947136	chr6	20032627	20032628	MBOAT1	154141	180041	CGI	FALSE	FALSE	TRUE
cg05085230	chr6	133562461	133562462	EYA4	2070	724	CGI	TRUE	TRUE	FALSE
cg05106897	chr6	34433775	34433776	PACSIN1	29993	-76	CGI	TRUE	FALSE	FALSE
cg05452406	chr6	10881891	10881892	GCM2	9247	205	CGI-N-Shore	FALSE	TRUE	FALSE
cg05482498	chr6	28866178	28866179	TRIM27	5987	25588	CGI-S-Shore	FALSE	FALSE	TRUE
cg05877222	chr6	156952186	156952187	ARID1B	57492	-146876	CGI	FALSE	FALSE	TRUE
cg05942459	chr6	101846805	101846806	GRIK2	2898	135	CGI	TRUE	TRUE	FALSE
cg05943655	chr6	43636172	43636173	MRPS18A	55168	19375	Non-CGI	FALSE	TRUE	FALSE
cg05950711	chr6	56112590	56112591	COL21A1	81578	146300	CGI-S-Shore	TRUE	TRUE	FALSE
cg06421138	chr6	111750934	111750935	TRAF3IP2-AS1	643749	-53739	Non-CGI	FALSE	TRUE	FALSE
cg06558014	chr6	100051116	100051117	PRDM13	59336	-3532	CGI	FALSE	FALSE	TRUE
cg06759058	chr6	28602864	28602865	SCAND3	114821	-47751	CGI	TRUE	FALSE	FALSE
cg06815976	chr6	32164816	32164817	GPSM3	63940	-1515	CGI-S-Shore	TRUE	TRUE	FALSE
cg06924241	chr6	43613395	43613396	RSPH9	221421	627	CGI-S-Shore	FALSE	TRUE	FALSE
cg07143470	chr6	56111812	56111813	COL21A1	81578	147078	CGI-N-Shore	FALSE	TRUE	FALSE
cg07515565	chr6	1624386	1624387	FOXC1	2296	13704	CGI	FALSE	TRUE	FALSE
cg08001895	chr6	94129582	94129583	EPHA7	2045	-281	CGI	TRUE	FALSE	FALSE
cg08194879	chr6	123317569	123317570	CLVS2	134829	-11	CGI	TRUE	FALSE	FALSE
cg08377819	chr6	28956268	28956269	ZNF311	282890	16823	CGI	TRUE	FALSE	FALSE
cg08548396	chr6	30095549	30095550	TRIM40	135644	-8334	CGI	TRUE	FALSE	FALSE
cg08550317	chr6	3850732	3850733	FAM50B	26240	1099	CGI	TRUE	TRUE	FALSE
cg08866794	chr6	42104596	42104597	C6orf132	647024	6117	Non-CGI	FALSE	TRUE	FALSE
cg08958294	chr6	146350131	146350132	GRM1	2911	1348	CGI	TRUE	TRUE	FALSE
cg08979319	chr6	100896055	100896056	SIM1	6492	16748	CGI	FALSE	TRUE	FALSE
cg09086442	chr6	168079212	168079213	C6orf123	26238	118325	CGI	FALSE	TRUE	FALSE
cg09322259	chr6	106434131	106434132	PRDM1	639	-100062	CGI	FALSE	FALSE	TRUE
cg09508938	chr6	13770042	13770043	CCDC90A	63933	44748	CGI	FALSE	FALSE	TRUE
cg09971314	chr6	28415023	28415024	ZSCAN23	222696	-3743	CGI	FALSE	FALSE	TRUE
cg10074727	chr6	10883105	10883106	GCM2	9247	-1006	CGI	TRUE	TRUE	FALSE
cg10096145	chr6	17281838	17281839	RBM24	221662	28	CGI	TRUE	FALSE	FALSE
cg10135483	chr6	87647527	87647528	HTR1E	3354	502	CGI	TRUE	FALSE	FALSE
cg10176110	chr6	168841653	168841654	SMOC2	64094	-176	CGI	TRUE	FALSE	FALSE
cg10739715	chr6	28945507	28945508	ZNF311	282890	27584	CGI	FALSE	FALSE	TRUE
cg10948359	chr6	84140683	84140684	ME1	4199	253	CGI	TRUE	FALSE	FALSE
cg10972973	chr6	28602745	28602746	SCAND3	114821	-47632	CGI	TRUE	FALSE	FALSE
cg11118422	chr6	28557883	28557884	SCAND3	114821	-2770	CGI	FALSE	TRUE	FALSE
cg11445094	chr6	28521837	28521838	GPX5	2880	28047	CGI-N-Shore	FALSE	FALSE	TRUE
cg11660826	chr6	150286508	150286509	ULBP1	80329	1364	CGI-S-Shore	FALSE	TRUE	FALSE
cg11907729	chr6	55443757	55443758	HMGCLL1	54511	253	CGI	TRUE	FALSE	FALSE
cg12123671	chr6	170605623	170605624	DLL1	28514	-5925	CGI	FALSE	FALSE	TRUE
cg12177182	chr6	168918116	168918117	SMOC2	64094	76284	CGI	FALSE	TRUE	FALSE
cg12412902	chr6	34499504	34499505	SPDEF	25803	24604	CGI	FALSE	TRUE	FALSE
cg12648520	chr6	28778195	28778196	LOC401242	401242	53257	CGI	FALSE	FALSE	TRUE
cg12744820	chr6	137814960	137814961	OLIG3	167826	569	CGI	TRUE	FALSE	FALSE
cg13307058	chr6	134497542	134497543	HMGA1P7	387065	-58723	CGI	TRUE	TRUE	FALSE
cg13371788	chr6	117586817	117586818	VGLL2	245806	95	CGI	TRUE	FALSE	FALSE
cg13447295	chr6	887704	887705	EXOC2	55770	-194594	CGI	FALSE	FALSE	TRUE
cg13524302	chr6	33084798	33084799	HLA-DPB2	3116	4504	CGI-N-Shore	FALSE	TRUE	FALSE
cg13612083	chr6	127836053	127836054	SOGA3	387104	4445	CGI	FALSE	TRUE	FALSE
cg14203970	chr6	155363859	155363860	TIAM2	26230	210027	Non-CGI	FALSE	TRUE	FALSE
cg14500486	chr6	159655392	159655393	FNDC1	84624	64962	CGI	FALSE	TRUE	FALSE
cg14537713	chr6	27258466	27258467	POM121L2	94026	21543	CGI	TRUE	FALSE	FALSE
cg14848685	chr6	138613022	138613023	PBOV1	59351	-73394	CGI-N-Shore	FALSE	TRUE	FALSE
cg14951598	chr6	41472931	41472932	FOXP4	116113	-41231	CGI	FALSE	TRUE	FALSE
cg15012484	chr6	3232246	3232247	TUBB2B	347733	-4277	CGI	FALSE	TRUE	FALSE
cg15226275	chr6	116381976	116381977	FRK	2444	-54	Non-CGI	TRUE	FALSE	FALSE
cg15255946	chr6	32729563	32729564	HLA-DQB2	3120	1765	CGI	FALSE	TRUE	FALSE
cg15543281	chr6	33245181	33245182	B3GALT4	8705	263	CGI	TRUE	FALSE	FALSE
cg15794859	chr6	134214134	134214135	TCF21	6943	3874	CGI	FALSE	TRUE	FALSE
cg16108230	chr6	117584815	117584816	VGLL2	245806	-1904	CGI-S-Shore	TRUE	FALSE	FALSE
cg16331823	chr6	30711835	30711836	IER3	8870	490	CGI	TRUE	TRUE	FALSE
cg16368146	chr6	29943425	29943426	HCG9	10255	532	CGI	FALSE	TRUE	FALSE
cg16390139	chr6	74161222	74161223	MB21D1	115004	819	CGI	FALSE	TRUE	FALSE
cg16615154	chr6	40567553	40567554	LRFN2	57497	-12426	CGI	FALSE	FALSE	TRUE
cg17754510	chr6	10391412	10391413	LOC100130275	100130275	-21137	CGI	FALSE	FALSE	TRUE
cg17983217	chr6	31698223	31698224	DDAH2	23564	-183	CGI	TRUE	FALSE	FALSE
cg18005901	chr6	33739558	33739559	LEMD2	221496	17346	CGI	FALSE	TRUE	FALSE
cg18213472	chr6	84419189	84419190	SNAP91	9892	-61	CGI	TRUE	FALSE	FALSE
cg18373855	chr6	159360209	159360210	C6orf99	100130967	50589	CGI	FALSE	FALSE	TRUE
cg18702108	chr6	43422695	43422696	DLK2	65989	1089	CGI	FALSE	TRUE	FALSE
cg18782604	chr6	100895050	100895051	SIM1	6492	17753	CGI	FALSE	TRUE	FALSE
cg18965377	chr6	91006634	91006635	BACH2	60468	-6	CGI-S-Shore	TRUE	FALSE	FALSE
cg19046933	chr6	30038922	30038923	PPP1R11	6992	3989	CGI-N-Shore	FALSE	TRUE	FALSE
cg19223299	chr6	100057160	100057161	PRDM13	59336	2509	CGI	FALSE	TRUE	FALSE
cg19384531	chr6	50692252	50692253	TFAP2D	83741	10994	CGI	FALSE	TRUE	FALSE
cg19519310	chr6	1389367	1389368	FOXF2	2295	-700	CGI	TRUE	FALSE	FALSE
cg19732154	chr6	32164558	32164559	GPSM3	63940	-1257	CGI	TRUE	TRUE	FALSE
cg20114732	chr6	166579135	166579136	T	6862	2994	CGI-N-Shore	FALSE	TRUE	FALSE
cg20372956	chr6	160148392	160148393	WTAP	9589	262	CGI	TRUE	TRUE	FALSE
cg20660989	chr6	35150136	35150137	SCUBE3	222663	-32052	CGI	FALSE	FALSE	TRUE
cg20844851	chr6	117591827	117591828	VGLL2	245806	5105	CGI	FALSE	TRUE	FALSE
cg21104965	chr6	117869453	117869454	GOPC	57120	54250	CGI	FALSE	TRUE	FALSE
cg21153898	chr6	29521788	29521789	UBD	10537	5912	CGI	FALSE	FALSE	TRUE
cg21640187	chr6	4282172	4282173	ECI2	10455	-146340	CGI	FALSE	FALSE	TRUE
cg22036966	chr6	26183576	26183577	HIST1H2BE	8344	-446	CGI	TRUE	FALSE	FALSE
cg22039242	chr6	143999236	143999237	PHACTR2	9749	69918	CGI	TRUE	TRUE	FALSE
cg22237300	chr6	52171973	52171974	MCM3	4172	-22390	CGI	FALSE	FALSE	TRUE
cg22305167	chr6	29521420	29521421	UBD	10537	6280	CGI	FALSE	FALSE	TRUE
cg22363327	chr6	89828097	89828098	SRSF12	135295	-296	CGI	TRUE	FALSE	FALSE
cg22389949	chr6	152003038	152003039	ESR1	2099	-8591	CGI	FALSE	FALSE	TRUE
cg23075555	chr6	33084789	33084790	HLA-DPB2	3116	4495	CGI-N-Shore	FALSE	TRUE	FALSE
cg23076086	chr6	112194849	112194850	FYN	2534	-193	CGI	TRUE	FALSE	FALSE
cg23079252	chr6	30095199	30095200	TRIM40	135644	-8684	CGI	TRUE	FALSE	FALSE
cg23205538	chr6	162444494	162444495	PACRG	135138	-703668	Non-CGI	FALSE	TRUE	FALSE
cg23250574	chr6	28661310	28661311	SCAND3	114821	-106197	CGI	TRUE	FALSE	FALSE
cg23279756	chr6	109159348	109159349	ARMC2	84071	-10269	Non-CGI	FALSE	FALSE	TRUE
cg23281154	chr6	72130547	72130548	LINC00472	79940	-98	CGI	TRUE	FALSE	FALSE
cg23287992	chr6	31734390	31734391	VWA7	80737	10716	CGI	FALSE	TRUE	FALSE
cg23414861	chr6	74064064	74064065	DPPA5	340168	-64	CGI	TRUE	FALSE	FALSE
cg23657299	chr6	166422626	166422627	LINC00473	90632	-21098	CGI	FALSE	FALSE	TRUE
cg23976457	chr6	85995874	85995875	NT5E	4907	-163426	CGI	FALSE	FALSE	TRUE
cg23997263	chr6	96462814	96462815	FUT9	10690	-1029	CGI-N-Shore	TRUE	FALSE	FALSE
cg24035447	chr6	48036613	48036614	PTCHD4	442213	42328	CGI	TRUE	TRUE	FALSE
cg24211504	chr6	100903575	100903576	SIM1	6492	9228	CGI	FALSE	TRUE	FALSE
cg24366557	chr6	50787650	50787651	TFAP2B	7021	1210	CGI	FALSE	TRUE	FALSE
cg24514884	chr6	134639203	134639204	SGK1	6446	-6	CGI-S-Shore	TRUE	FALSE	FALSE
cg24627332	chr6	76059450	76059451	LOC100506804	100506804	64719	CGI-N-Shore	FALSE	TRUE	FALSE
cg24724428	chr6	11044888	11044889	ELOVL2	54898	-263	CGI	TRUE	TRUE	FALSE
cg24772267	chr6	72130742	72130743	LINC00472	79940	-293	CGI	TRUE	FALSE	FALSE
cg24822696	chr6	125283245	125283246	RNF217	154214	-615	CGI	TRUE	TRUE	FALSE
cg25146017	chr6	110679400	110679401	METTL24	728464	52537	CGI	TRUE	TRUE	FALSE
cg25147604	chr6	7540971	7540972	DSP	1832	-897	CGI	TRUE	FALSE	FALSE
cg25288068	chr6	28793681	28793682	LOC401242	401242	37771	CGI	FALSE	FALSE	TRUE
cg25302957	chr6	17282284	17282285	RBM24	221662	474	CGI	TRUE	TRUE	FALSE
cg25694032	chr6	164507164	164507165	QKI	9444	671488	CGI	FALSE	FALSE	TRUE
cg26249106	chr6	117198222	117198223	RFX6	222546	-152	CGI	TRUE	FALSE	FALSE
cg26576890	chr6	41374939	41374940	NCR2	9436	71410	CGI	FALSE	FALSE	TRUE
cg26715952	chr6	62996119	62996120	KHDRBS2	202559	-18	CGI	TRUE	FALSE	FALSE
cg26747317	chr6	31829793	31829794	NEU1	4758	914	CGI-N-Shore	FALSE	TRUE	FALSE
cg26760793	chr6	32940796	32940797	BRD2	6046	4358	CGI	TRUE	TRUE	FALSE
cg26954968	chr6	100903561	100903562	SIM1	6492	9242	CGI	FALSE	TRUE	FALSE
cg26972832	chr6	24437460	24437461	MRS2	57380	34306	Non-CGI	FALSE	TRUE	FALSE
cg27037103	chr6	37666346	37666347	MDGA1	266727	-579	CGI	TRUE	FALSE	FALSE
cg27112666	chr6	100050791	100050792	PRDM13	59336	-3857	CGI	FALSE	FALSE	TRUE
cg27149530	chr6	692947	692948	EXOC2	55770	160	CGI	FALSE	TRUE	FALSE
cg27250236	chr6	48036617	48036618	PTCHD4	442213	42324	CGI	TRUE	TRUE	FALSE
cg27282900	chr6	30095258	30095259	TRIM40	135644	-8625	CGI	TRUE	FALSE	FALSE
cg27415552	chr6	26183588	26183589	HIST1H2BE	8344	-434	CGI	TRUE	FALSE	FALSE
cg00094518	chr7	130418549	130418550	KLF14	136259	337	CGI	TRUE	FALSE	FALSE
cg00106345	chr7	27138396	27138397	HOTAIRM1	100506311	2682	CGI	FALSE	TRUE	FALSE
cg00167539	chr7	150066156	150066157	REPIN1	29803	794	CGI	FALSE	TRUE	FALSE
cg00292135	chr7	156433068	156433069	C7orf13	129790	278	CGI	TRUE	TRUE	FALSE
cg00356183	chr7	751833	751834	HEATR2	54919	-14503	CGI	FALSE	TRUE	FALSE
cg01003961	chr7	20824706	20824707	SP8	221833	1800	CGI	TRUE	TRUE	FALSE
cg01104724	chr7	56297564	56297565	NUPR1L	389493	-113473	CGI	FALSE	FALSE	TRUE
cg01176516	chr7	63506148	63506149	ZNF727	442319	326	CGI	FALSE	TRUE	FALSE
cg01426853	chr7	123673549	123673550	TMEM229A	730130	-25	CGI	TRUE	TRUE	FALSE
cg01455568	chr7	155261034	155261035	EN2	2020	10209	CGI	FALSE	FALSE	TRUE
cg01582980	chr7	20825545	20825546	SP8	221833	961	CGI	TRUE	TRUE	FALSE
cg01667837	chr7	124405605	124405606	GPR37	2861	74	CGI	TRUE	FALSE	FALSE
cg01776691	chr7	44279727	44279728	YKT6	10652	39148	CGI	FALSE	TRUE	FALSE
cg01841651	chr7	105672016	105672017	SYPL1	6856	81039	Non-CGI	FALSE	TRUE	FALSE
cg01893439	chr7	148581376	148581377	EZH2	2146	63	CGI	TRUE	FALSE	FALSE
cg02557695	chr7	90895083	90895084	FZD1	8321	1299	CGI	TRUE	FALSE	FALSE
cg02589791	chr7	63955666	63955667	LOC649395	649395	61594	CGI	FALSE	FALSE	TRUE
cg02661879	chr7	128470614	128470615	FLNC	2318	130	CGI	TRUE	FALSE	FALSE
cg02695349	chr7	38269241	38269242	STARD3NL	83930	51432	Non-CGI	FALSE	TRUE	FALSE
cg02925800	chr7	102789617	102789618	NAPEPLD	222236	388	CGI	TRUE	TRUE	FALSE
cg03225210	chr7	143579951	143579952	FAM115A	9747	19325	CGI	FALSE	TRUE	FALSE
cg03366574	chr7	2764599	2764600	AMZ1	155185	45435	CGI	FALSE	FALSE	TRUE
cg03906434	chr7	27231819	27231820	HOXA11-AS	221883	6791	CGI	FALSE	FALSE	TRUE
cg03981954	chr7	121942010	121942011	FEZF1-AS1	154860	-1700	CGI	TRUE	TRUE	FALSE
cg04005938	chr7	148334417	148334418	C7orf33	202865	46759	CGI	FALSE	FALSE	TRUE
cg04652097	chr7	79083445	79083446	MAGI2	9863	-554	CGI	TRUE	TRUE	FALSE
cg04842426	chr7	136555777	136555778	CHRM2	1129	2377	CGI	FALSE	TRUE	FALSE
cg05253110	chr7	141130687	141130688	AGK	55750	-120389	Non-CGI	FALSE	TRUE	FALSE
cg05293994	chr7	122526843	122526844	CADPS2	93664	-29	CGI	TRUE	FALSE	FALSE
cg05620980	chr7	562844	562845	FLJ44511	441307	2815	CGI	TRUE	FALSE	FALSE
cg05669210	chr7	100450634	100450635	SLC12A9	56996	275	CGI-S-Shore	TRUE	TRUE	FALSE
cg05732750	chr7	6704045	6704046	ZNF12	7559	42519	CGI	FALSE	TRUE	FALSE
cg05952925	chr7	93551275	93551276	GNG11	2791	258	CGI	TRUE	FALSE	FALSE
cg05994320	chr7	113727753	113727754	FOXP2	93986	1387	CGI	FALSE	TRUE	FALSE
cg06159603	chr7	122526836	122526837	CADPS2	93664	-22	CGI	TRUE	FALSE	FALSE
cg06713098	chr7	45960367	45960368	IGFBP3	3486	502	CGI	TRUE	TRUE	FALSE
cg06715136	chr7	158046025	158046026	MIR595	693180	279478	CGI-N-Shore	FALSE	TRUE	FALSE
cg07067171	chr7	32996829	32996830	FKBP9	11328	-174	CGI	TRUE	TRUE	FALSE
cg07143083	chr7	70597921	70597922	WBSCR17	64409	131	CGI	TRUE	FALSE	FALSE
cg07435894	chr7	95063967	95063968	PON2	5445	415	CGI-N-Shore	FALSE	TRUE	FALSE
cg07464571	chr7	127881001	127881002	LEP	3952	-328	CGI	TRUE	FALSE	FALSE
cg07870999	chr7	155260895	155260896	EN2	2020	10070	CGI	FALSE	FALSE	TRUE
cg08101036	chr7	27153655	27153656	HOXA2	3199	-11260	CGI	FALSE	TRUE	FALSE
cg08135727	chr7	64254733	64254734	ZNF138	7697	-36	CGI-N-Shore	TRUE	FALSE	FALSE
cg08202754	chr7	152621979	152621980	ACTR3B	57180	165127	CGI	FALSE	FALSE	TRUE
cg08540953	chr7	100815796	100815797	VGF	7425	-6943	CGI	FALSE	TRUE	FALSE
cg08627377	chr7	112095256	112095257	C7orf53	286006	-25650	CGI-S-Shelf	FALSE	TRUE	FALSE
cg08641579	chr7	79083447	79083448	MAGI2	9863	-556	CGI	TRUE	TRUE	FALSE
cg08752303	chr7	148822673	148822674	ZNF425	155054	763	CGI	TRUE	TRUE	FALSE
cg08832624	chr7	98099917	98099918	BAIAP2L1	55971	-69489	CGI-N-Shore	FALSE	FALSE	TRUE
cg08832906	chr7	139208852	139208853	CLEC2L	154790	177	CGI	TRUE	FALSE	FALSE
cg09134205	chr7	154003215	154003216	DPP6	1804	418795	CGI	FALSE	TRUE	FALSE
cg09493505	chr7	49813111	49813112	VWC2	375567	-144	CGI	TRUE	FALSE	FALSE
cg09519327	chr7	150710730	150710731	ATG9B	285973	10854	CGI	FALSE	TRUE	FALSE
cg09533868	chr7	807608	807609	PRKAR1B	5575	-40294	CGI	TRUE	TRUE	FALSE
cg09613161	chr7	51384528	51384529	COBL	23242	-12	CGI	TRUE	FALSE	FALSE
cg09652312	chr7	155284062	155284063	EN2	2020	33237	CGI-S-Shore	FALSE	FALSE	TRUE
cg09796320	chr7	65447328	65447329	GUSB	2990	-26	CGI	TRUE	FALSE	FALSE
cg09936824	chr7	27187670	27187671	HOXA6	3203	-276	CGI	TRUE	TRUE	FALSE
cg10213875	chr7	48129814	48129815	UPP1	7378	1458	CGI	TRUE	TRUE	FALSE
cg10479082	chr7	28996639	28996640	LOC100506497	100506497	-22942	CGI	FALSE	TRUE	FALSE
cg10552126	chr7	154002064	154002065	DPP6	1804	417644	CGI	TRUE	TRUE	FALSE
cg10580293	chr7	29605897	29605898	PRR15	222171	2469	CGI	TRUE	TRUE	FALSE
cg10613546	chr7	157586866	157586867	LOC100506585	100506585	-60409	CGI	FALSE	TRUE	FALSE
cg10978753	chr7	56605828	56605829	DKFZp434L192	222029	41911	CGI	TRUE	FALSE	FALSE
cg11073773	chr7	25897512	25897513	MIR148A	406940	92092	CGI	FALSE	FALSE	TRUE
cg11581706	chr7	82072141	82072142	CACNA2D1	781	888	CGI	FALSE	TRUE	FALSE
cg11590780	chr7	128470419	128470420	FLNC	2318	-62	CGI	TRUE	FALSE	FALSE
cg11592503	chr7	145813417	145813418	CNTNAP2	26047	-34	CGI	TRUE	FALSE	FALSE
cg11698888	chr7	156813023	156813024	LOC645249	645249	9471	CGI	FALSE	FALSE	TRUE
cg11757417	chr7	98424289	98424290	TMEM130	222865	43382	CGI	FALSE	FALSE	TRUE
cg11791427	chr7	73704194	73704195	CLIP2	7461	388	CGI	FALSE	TRUE	FALSE
cg12172057	chr7	47621687	47621688	TNS3	64759	53	CGI	TRUE	FALSE	FALSE
cg12838902	chr7	5322586	5322587	SLC29A4	222962	24	CGI	TRUE	FALSE	FALSE
cg12889810	chr7	98287347	98287348	NPTX2	4885	40749	CGI	FALSE	FALSE	TRUE
cg12997720	chr7	27225058	27225059	HOXA11-AS	221883	30	CGI	TRUE	FALSE	FALSE
cg13381984	chr7	127881344	127881345	LEP	3952	12	CGI	TRUE	FALSE	FALSE
cg13566610	chr7	103630083	103630084	RELN	5649	-119	CGI	TRUE	FALSE	FALSE
cg13567541	chr7	128828303	128828304	SMO	6608	-408	CGI	TRUE	FALSE	FALSE
cg13765278	chr7	153641242	153641243	DPP6	1804	56822	Non-CGI	FALSE	TRUE	FALSE
cg13895235	chr7	752292	752293	HEATR2	54919	-14044	CGI	TRUE	TRUE	FALSE
cg14044640	chr7	27187560	27187561	HOXA6	3203	-166	CGI	TRUE	TRUE	FALSE
cg14115936	chr7	73002496	73002497	TBL2	26608	-9482	CGI	FALSE	FALSE	TRUE
cg14709460	chr7	28998078	28998079	LOC100506497	100506497	-21503	CGI	TRUE	FALSE	FALSE
cg14871932	chr7	44185323	44185324	MYL7	58498	-4406	CGI	FALSE	TRUE	FALSE
cg15205547	chr7	23514347	23514348	IGF2BP3	10643	-4351	CGI	FALSE	FALSE	TRUE
cg15506609	chr7	27206073	27206074	HOXA9	3205	-923	CGI	TRUE	TRUE	FALSE
cg15818671	chr7	152622022	152622023	ACTR3B	57180	165170	CGI	FALSE	FALSE	TRUE
cg16392213	chr7	121943990	121943991	FEZF1-AS1	154860	277	CGI	TRUE	TRUE	FALSE
cg16516785	chr7	100291438	100291439	GIGYF1	64599	-4567	CGI	FALSE	FALSE	TRUE
cg16521917	chr7	145813946	145813947	CNTNAP2	26047	492	CGI	TRUE	FALSE	FALSE
cg16544956	chr7	20825634	20825635	SP8	221833	872	CGI	TRUE	TRUE	FALSE
cg16689048	chr7	1084162	1084163	GPR146	115330	-12977	CGI	FALSE	TRUE	FALSE
cg16817992	chr7	150655133	150655134	KCNH2	3757	20267	CGI-N-Shore	FALSE	TRUE	FALSE
cg16899367	chr7	73097788	73097789	DNAJC30	84277	-6	CGI	TRUE	FALSE	FALSE
cg17322443	chr7	152133420	152133421	MLL3	58508	-329	CGI	TRUE	FALSE	FALSE
cg17403699	chr7	152622135	152622136	ACTR3B	57180	165283	CGI	FALSE	FALSE	TRUE
cg17554604	chr7	140774522	140774523	TMEM178B	100507421	489	CGI	FALSE	TRUE	FALSE
cg17960051	chr7	87257673	87257674	RUNDC3B	154661	-54	CGI	TRUE	TRUE	FALSE
cg18045859	chr7	73184526	73184527	CLDN3	1365	72	CGI	TRUE	FALSE	FALSE
cg18057109	chr7	156409738	156409739	C7orf13	129790	23608	CGI	FALSE	FALSE	TRUE
cg18247307	chr7	16461064	16461065	ISPD	729920	-116	CGI	TRUE	FALSE	FALSE
cg18274279	chr7	73153629	73153630	ABHD11	83451	-438	CGI	TRUE	FALSE	FALSE
cg18601167	chr7	752286	752287	HEATR2	54919	-14050	CGI	TRUE	TRUE	FALSE
cg18811550	chr7	27198311	27198312	HOXA7	3204	-2014	CGI	FALSE	FALSE	TRUE
cg18852765	chr7	98030641	98030642	BAIAP2L1	55971	-213	CGI	TRUE	FALSE	FALSE
cg18966597	chr7	155246474	155246475	EN2	2020	-4348	CGI	FALSE	FALSE	TRUE
cg19041648	chr7	87105216	87105217	ABCB4	5244	-196	CGI	TRUE	FALSE	FALSE
cg19325139	chr7	41982462	41982463	INHBA	3624	-239755	CGI	FALSE	FALSE	TRUE
cg19430577	chr7	87936225	87936226	STEAP4	79689	1	CGI	TRUE	FALSE	FALSE
cg19655177	chr7	155290274	155290275	CNPY1	285888	36263	CGI	FALSE	FALSE	TRUE
cg19929638	chr7	155584080	155584081	SHH	6469	20885	CGI-S-Shore	FALSE	FALSE	TRUE
cg20007465	chr7	1068125	1068126	MIR339	442907	-5462	CGI	TRUE	TRUE	FALSE
cg20164601	chr7	63642083	63642084	ZNF735	730291	-25496	CGI	FALSE	FALSE	TRUE
cg20218073	chr7	155832938	155832939	SHH	6469	-227970	CGI	FALSE	FALSE	TRUE
cg20222926	chr7	121946018	121946019	FEZF1	389549	-1452	CGI	TRUE	TRUE	FALSE
cg20229339	chr7	74867602	74867603	LOC100093631	100093631	-260	CGI	TRUE	TRUE	FALSE
cg20266316	chr7	98247587	98247588	NPTX2	4885	989	CGI	FALSE	TRUE	FALSE
cg20426994	chr7	130418324	130418325	KLF14	136259	562	CGI	TRUE	FALSE	FALSE
cg20824189	chr7	1704082	1704083	ELFN1	392617	-44714	CGI	FALSE	FALSE	TRUE
cg20897830	chr7	56297579	56297580	NUPR1L	389493	-113488	CGI	FALSE	FALSE	TRUE
cg21003581	chr7	82792239	82792240	PCLO	27445	-41	CGI	TRUE	FALSE	FALSE
cg21038156	chr7	158936739	158936740	VIPR2	7434	908	CGI	FALSE	TRUE	FALSE
cg21424664	chr7	56174299	56174300	CHCHD2	51142	-111	CGI	TRUE	TRUE	FALSE
cg21483883	chr7	37487352	37487353	ELMO1	9844	1541	CGI	FALSE	TRUE	FALSE
cg21733531	chr7	63560711	63560712	ZNF727	442319	54889	CGI	FALSE	FALSE	TRUE
cg21887193	chr7	150786082	150786083	AGAP3	116988	3127	CGI-S-Shore	FALSE	TRUE	FALSE
cg22052566	chr7	151079167	151079168	WDR86-AS1	100131176	-27153	CGI	FALSE	TRUE	FALSE
cg22086566	chr7	3989097	3989098	SDK1	221935	648016	CGI	FALSE	TRUE	FALSE
cg22190833	chr7	150929518	150929519	CHPF2	54480	-55	CGI	TRUE	FALSE	FALSE
cg22796353	chr7	156400281	156400282	C7orf13	129790	33065	CGI	FALSE	FALSE	TRUE
cg22962123	chr7	27153605	27153606	HOXA2	3199	-11210	CGI	FALSE	TRUE	FALSE
cg23181844	chr7	19812548	19812549	TMEM196	256130	666	CGI	TRUE	TRUE	FALSE
cg23316599	chr7	57271379	57271380	GUSBP10	642006	-23515	CGI	FALSE	FALSE	TRUE
cg23616761	chr7	94285329	94285330	SGCE	8910	190	CGI	TRUE	FALSE	FALSE
cg23690528	chr7	94285270	94285271	SGCE	8910	249	CGI	TRUE	TRUE	FALSE
cg23755113	chr7	65670237	65670238	TPST1	8460	-20	CGI	TRUE	FALSE	FALSE
cg23778596	chr7	149411498	149411499	KRBA1	84626	-602	CGI	TRUE	FALSE	FALSE
cg23799901	chr7	124404431	124404432	GPR37	2861	1248	CGI	TRUE	FALSE	FALSE
cg23884241	chr7	27169957	27169958	HOXA4	3201	440	CGI	TRUE	FALSE	FALSE
cg24061141	chr7	35293869	35293870	TBX20	57057	-157	CGI	TRUE	FALSE	FALSE
cg24399959	chr7	82792053	82792054	PCLO	27445	142	CGI	TRUE	FALSE	FALSE
cg24707573	chr7	101961796	101961797	MIR4285	100422858	25426	CGI	FALSE	TRUE	FALSE
cg24881205	chr7	20826188	20826189	SP8	221833	318	CGI	TRUE	TRUE	FALSE
cg24996433	chr7	150777871	150777872	FASTK	10922	78	CGI	TRUE	FALSE	FALSE
cg25201047	chr7	1282630	1282631	UNCX	340260	9975	CGI	FALSE	FALSE	TRUE
cg25337795	chr7	1015166	1015167	ADAP1	11033	67	CGI	TRUE	FALSE	FALSE
cg25726664	chr7	42277807	42277808	GLI3	2737	-1188	CGI	TRUE	FALSE	FALSE
cg26264232	chr7	27138751	27138752	HOTAIRM1	100506311	3037	CGI	FALSE	TRUE	FALSE
cg26673012	chr7	35293753	35293754	TBX20	57057	-41	CGI	TRUE	FALSE	FALSE
cg26690075	chr7	120968919	120968920	WNT16	51384	3497	CGI-N-Shore	TRUE	TRUE	FALSE
cg26986937	chr7	14029421	14029422	ETV1	2115	1627	CGI	TRUE	TRUE	FALSE
cg26990587	chr7	100253901	100253902	ACTL6B	51412	181	CGI	TRUE	TRUE	FALSE
cg27006947	chr7	63924280	63924281	LOC649395	649395	30208	CGI	FALSE	FALSE	TRUE
cg27200869	chr7	158045980	158045981	MIR595	693180	279523	CGI-N-Shore	FALSE	TRUE	FALSE
cg27341472	chr7	19812592	19812593	TMEM196	256130	622	CGI	TRUE	TRUE	FALSE
cg27392792	chr7	158380886	158380887	PTPRN2	5799	-403	CGI	TRUE	FALSE	FALSE
cg27535211	chr7	132160221	132160222	PLXNA4	91584	173224	Non-CGI	FALSE	TRUE	FALSE
cg00320027	chr8	101734560	101734561	PABPC1	26986	-244	CGI	TRUE	FALSE	FALSE
cg00425918	chr8	23563146	23563147	NKX2-6	137814	963	CGI	FALSE	TRUE	FALSE
cg01546729	chr8	106330540	106330541	ZFPM2	23414	-605	CGI	TRUE	FALSE	FALSE
cg01563148	chr8	145623258	145623259	MIR1234	100302196	2299	CGI	FALSE	TRUE	FALSE
cg01566592	chr8	104512858	104512859	RIMS2	9699	-116	CGI	TRUE	FALSE	FALSE
cg01923999	chr8	127568677	127568678	FAM84B	157638	2032	CGI-N-Shore	FALSE	TRUE	FALSE
cg02225716	chr8	120220856	120220857	MAL2	114569	245	CGI	FALSE	TRUE	FALSE
cg02246426	chr8	97162431	97162432	GDF6	392255	10587	CGI-N-Shelf	FALSE	TRUE	FALSE
cg02570977	chr8	144373277	144373278	ZNF696	79943	-280	CGI	TRUE	FALSE	FALSE
cg02995271	chr8	144816322	144816323	LOC100128338	100128338	11	CGI	TRUE	FALSE	FALSE
cg03007522	chr8	11562685	11562686	GATA4	2626	28216	CGI	FALSE	TRUE	FALSE
cg03032098	chr8	15397899	15397900	TUSC3	7991	302	CGI	TRUE	FALSE	FALSE
cg03127174	chr8	15397731	15397732	TUSC3	7991	134	CGI	TRUE	FALSE	FALSE
cg03304380	chr8	13134144	13134145	DLC1	10395	238283	CGI	TRUE	TRUE	FALSE
cg03347018	chr8	72756882	72756883	MSC	9242	-150	CGI	TRUE	TRUE	FALSE
cg03357798	chr8	69243285	69243286	C8orf34	116328	327	CGI	TRUE	TRUE	FALSE
cg04014062	chr8	79428725	79428726	PKIA	5569	388	CGI	FALSE	TRUE	FALSE
cg04050867	chr8	109095572	109095573	RSPO2	340419	339	CGI	TRUE	FALSE	FALSE
cg04118306	chr8	24772350	24772351	NEFM	4741	1075	CGI	TRUE	FALSE	FALSE
cg04134279	chr8	496327	496328	C8orf42	157695	-995	CGI	TRUE	FALSE	FALSE
cg04137003	chr8	142377434	142377435	GPR20	2843	-68	Non-CGI	TRUE	FALSE	FALSE
cg04773818	chr8	31496966	31496967	NRG1	3084	54	CGI	TRUE	TRUE	FALSE
cg04920358	chr8	49468800	49468801	EFCAB1	79645	179068	CGI	FALSE	FALSE	TRUE
cg06383163	chr8	139509073	139509074	FAM135B	51059	-7	CGI	TRUE	FALSE	FALSE
cg06822816	chr8	120220882	120220883	MAL2	114569	271	CGI	FALSE	TRUE	FALSE
cg07041999	chr8	2178272	2178273	MYOM2	9172	185113	CGI-S-Shore	FALSE	FALSE	TRUE
cg07161721	chr8	72459953	72459954	EYA1	2138	-185485	CGI	TRUE	FALSE	FALSE
cg07222863	chr8	104153592	104153593	C8orf56	157556	-21	CGI	TRUE	TRUE	FALSE
cg07357300	chr8	76319672	76319673	HNF4G	3174	-509	CGI	TRUE	FALSE	FALSE
cg08273169	chr8	144255650	144255651	LY6H	4062	-13596	CGI	FALSE	FALSE	TRUE
cg08322102	chr8	77595321	77595322	ZFHX4-AS1	100192378	187	CGI-S-Shore	TRUE	TRUE	FALSE
cg08476224	chr8	128806271	128806272	PVT1	5820	-506	CGI	TRUE	FALSE	FALSE
cg08796640	chr8	119123054	119123055	EXT1	2131	1002	CGI	TRUE	FALSE	FALSE
cg08909802	chr8	145049419	145049420	PLEC	5339	1492	CGI	TRUE	TRUE	FALSE
cg08928882	chr8	77593362	77593363	ZFHX4	79776	-151	CGI	TRUE	TRUE	FALSE
cg09232555	chr8	11619866	11619867	NEIL2	252969	-7304	CGI	TRUE	FALSE	FALSE
cg09497201	chr8	25906243	25906244	EBF2	64641	-3602	CGI	FALSE	TRUE	FALSE
cg09559047	chr8	10916868	10916869	MIR598	693183	-24055	CGI-N-Shore	FALSE	TRUE	FALSE
cg09559189	chr8	25898412	25898413	EBF2	64641	4226	CGI	FALSE	TRUE	FALSE
cg10145449	chr8	145101671	145101672	OPLAH	26873	13911	CGI-N-Shore	FALSE	TRUE	FALSE
cg10715223	chr8	101661788	101661789	SNX31	169166	103	CGI	TRUE	FALSE	FALSE
cg10951117	chr8	50653939	50653940	SNTG1	54212	-168408	Non-CGI	FALSE	FALSE	TRUE
cg11157235	chr8	142913304	142913305	MIR4472-1	100616268	-344394	Non-CGI	FALSE	FALSE	TRUE
cg11548303	chr8	23567350	23567351	NKX2-6	137814	-3238	CGI	FALSE	FALSE	TRUE
cg11904266	chr8	144652042	144652043	MROH6	642475	2884	CGI	FALSE	TRUE	FALSE
cg11982332	chr8	96037194	96037195	MIR3150A	100422964	-47946	CGI	TRUE	TRUE	FALSE
cg12166610	chr8	31498256	31498257	NRG1	3084	1344	CGI	FALSE	TRUE	FALSE
cg12263872	chr8	143745300	143745301	JRK	8629	6099	CGI	TRUE	TRUE	FALSE
cg12668482	chr8	72987762	72987763	TRPA1	8989	55	CGI	TRUE	FALSE	FALSE
cg13405783	chr8	54164296	54164297	OPRK1	4986	-101	CGI	TRUE	FALSE	FALSE
cg13434842	chr8	11567896	11567897	GATA4	2626	33427	CGI	FALSE	TRUE	FALSE
cg13438334	chr8	145550989	145550990	DGAT1	8694	-421	CGI	TRUE	FALSE	FALSE
cg14015441	chr8	105479318	105479319	DPYS	1807	-40	CGI	TRUE	FALSE	FALSE
cg14428146	chr8	23563925	23563926	NKX2-6	137814	184	CGI	TRUE	FALSE	FALSE
cg14824382	chr8	144680115	144680116	TIGD5	84948	40	CGI	TRUE	FALSE	FALSE
cg15427886	chr8	55379663	55379664	SOX17	64321	9167	CGI	FALSE	FALSE	TRUE
cg15858239	chr8	63161609	63161610	NKAIN3	286183	107	CGI	TRUE	FALSE	FALSE
cg16020747	chr8	85095394	85095395	RALYL	138046	-57	CGI	TRUE	FALSE	FALSE
cg16419235	chr8	57360613	57360614	PENK	5179	-1330	CGI	TRUE	TRUE	FALSE
cg16491617	chr8	54164391	54164392	OPRK1	4986	-196	CGI	TRUE	FALSE	FALSE
cg16736242	chr8	11660109	11660110	FDFT1	2222	7026	CGI	TRUE	TRUE	FALSE
cg16783744	chr8	105478855	105478856	DPYS	1807	420	CGI	FALSE	TRUE	FALSE
cg16803596	chr8	11561498	11561499	GATA4	2626	27029	CGI	TRUE	TRUE	FALSE
cg17066716	chr8	62627324	62627325	MIR4470	100616484	-21	CGI	TRUE	FALSE	FALSE
cg17101296	chr8	145925708	145925709	ARHGAP39	80728	-14513	CGI	FALSE	FALSE	TRUE
cg17147045	chr8	68864546	68864547	PREX2	80243	-55	CGI	TRUE	FALSE	FALSE
cg17457560	chr8	32405851	32405852	NRG1	3084	908939	CGI	TRUE	TRUE	FALSE
cg17495087	chr8	96085689	96085690	MIR3150B	100500907	-464	CGI	TRUE	TRUE	FALSE
cg17527435	chr8	1900400	1900401	KBTBD11	9920	-21642	CGI	FALSE	TRUE	FALSE
cg17570006	chr8	144510966	144510967	MAFA	389692	1634	CGI	TRUE	FALSE	FALSE
cg18041277	chr8	57030824	57030825	MOS	4342	-4282	CGI	FALSE	FALSE	TRUE
cg18153977	chr8	144952929	144952930	EPPK1	83481	-5494	CGI	FALSE	FALSE	TRUE
cg18239431	chr8	25898220	25898221	EBF2	64641	4418	CGI	FALSE	TRUE	FALSE
cg18533201	chr8	97157453	97157454	GDF6	392255	15565	CGI	FALSE	TRUE	FALSE
cg19101326	chr8	106331160	106331161	ZFPM2	23414	12	CGI	TRUE	FALSE	FALSE
cg19224713	chr8	119634283	119634284	SAMD12	401474	-48	CGI	TRUE	TRUE	FALSE
cg19677607	chr8	24772270	24772271	NEFM	4741	995	CGI	TRUE	FALSE	FALSE
cg20517154	chr8	17658561	17658562	MTUS1	57509	-134	CGI	TRUE	FALSE	FALSE
cg20518155	chr8	55366610	55366611	SOX17	64321	-3883	CGI	FALSE	FALSE	TRUE
cg20585869	chr8	24772333	24772334	NEFM	4741	1058	CGI	TRUE	FALSE	FALSE
cg20621463	chr8	38854327	38854328	ADAM9	8754	-176	CGI	TRUE	FALSE	FALSE
cg20864608	chr8	143533499	143533500	BAI1	575	-11876	CGI	FALSE	FALSE	TRUE
cg21638161	chr8	144512759	144512760	MAFA	389692	-156	CGI	TRUE	FALSE	FALSE
cg21695024	chr8	65498708	65498709	LOC401463	401463	-4262	CGI	FALSE	FALSE	TRUE
cg21768436	chr8	67341108	67341109	LOC100505676	100505676	102	CGI	TRUE	TRUE	FALSE
cg21925025	chr8	144508684	144508685	MAFA	389692	3916	CGI-N-Shore	FALSE	FALSE	TRUE
cg22052514	chr8	142401722	142401723	GPR20	2843	-24356	CGI	TRUE	FALSE	FALSE
cg22234712	chr8	96085385	96085386	MIR3150B	100500907	-160	CGI	TRUE	TRUE	FALSE
cg22295787	chr8	26723584	26723585	ADRA1A	148	-661	CGI	TRUE	TRUE	FALSE
cg22324567	chr8	25899434	25899435	EBF2	64641	3204	CGI	FALSE	TRUE	FALSE
cg22457668	chr8	1318052	1318053	LOC286083	286083	-67224	CGI-N-Shelf	FALSE	FALSE	TRUE
cg22524061	chr8	99959430	99959431	OSR2	116039	2798	CGI-S-Shore	FALSE	TRUE	FALSE
cg22600043	chr8	109095991	109095992	RSPO2	340419	-77	CGI	TRUE	FALSE	FALSE
cg22642178	chr8	83104676	83104677	SNX16	64089	-350154	CGI-N-Shore	FALSE	FALSE	TRUE
cg22981104	chr8	144255663	144255664	LY6H	4062	-13609	CGI	FALSE	FALSE	TRUE
cg23290344	chr8	24771466	24771467	NEFM	4741	191	CGI	TRUE	FALSE	FALSE
cg23294090	chr8	139509672	139509673	FAM135B	51059	-606	CGI	TRUE	FALSE	FALSE
cg23426958	chr8	1949329	1949330	KBTBD11	9920	27284	CGI	TRUE	TRUE	FALSE
cg23495279	chr8	4849827	4849828	CSMD1	64478	2499	CGI	FALSE	TRUE	FALSE
cg23973429	chr8	102504746	102504747	GRHL2	79977	77	CGI	TRUE	FALSE	FALSE
cg24023859	chr8	143809066	143809067	THEM6	51337	444	CGI	TRUE	FALSE	FALSE
cg24645214	chr8	54789978	54789979	RGS20	8601	25609	CGI	FALSE	TRUE	FALSE
cg24727311	chr8	13424269	13424270	C8orf48	157773	-81	CGI	TRUE	FALSE	FALSE
cg24848035	chr8	101118525	101118526	RGS22	26166	-180	CGI	TRUE	FALSE	FALSE
cg24928110	chr8	96085448	96085449	MIR3150B	100500907	-223	CGI	TRUE	TRUE	FALSE
cg25021970	chr8	1949342	1949343	KBTBD11	9920	27297	CGI	TRUE	TRUE	FALSE
cg25260137	chr8	65282185	65282186	LOC100130155	100130155	-3588	CGI	FALSE	FALSE	TRUE
cg25468618	chr8	144810034	144810035	MIR4664	100616318	5287	CGI	FALSE	TRUE	FALSE
cg25482853	chr8	67687455	67687456	PTTG3P	26255	-7214	CGI	TRUE	TRUE	FALSE
cg26220018	chr8	76320150	76320151	HNF4G	3174	-31	CGI	TRUE	FALSE	FALSE
cg26351229	chr8	132053780	132053781	ADCY8	114	-944	CGI	TRUE	FALSE	FALSE
cg26495757	chr8	21992877	21992878	HR	55806	-4311	CGI-S-Shore	FALSE	FALSE	TRUE
cg26902216	chr8	120220410	120220411	MAL2	114569	-198	CGI	TRUE	FALSE	FALSE
cg27100236	chr8	11561458	11561459	GATA4	2626	26989	CGI	TRUE	TRUE	FALSE
cg27126872	chr8	1948999	1949000	KBTBD11	9920	26954	CGI	TRUE	TRUE	FALSE
cg27411706	chr8	48389903	48389904	KIAA0146	23514	216413	Non-CGI	FALSE	TRUE	FALSE
cg27498387	chr8	41655789	41655790	NKX6-3	157848	-12403	CGI	TRUE	TRUE	FALSE
cg27511169	chr8	110704116	110704117	SYBU	55638	-95	CGI	TRUE	FALSE	FALSE
cg27646230	chr8	38326460	38326461	FGFR1	2260	-107	CGI	TRUE	FALSE	FALSE
cg00953282	chr9	139606849	139606850	FAM69B	138311	-173	CGI	TRUE	FALSE	FALSE
cg07687043	chr9	140484977	140484978	ZMYND19	116225	-39	CGI	TRUE	FALSE	FALSE
cg10755973	chr9	126773879	126773880	LHX2	9355	-8	CGI	TRUE	FALSE	FALSE
cg12085225	chr9	135230256	135230257	SETX	23064	114	CGI	FALSE	TRUE	FALSE
cg13408086	chr9	140221397	140221398	NRARP	441478	-24693	CGI	FALSE	TRUE	FALSE
cg13442960	chr9	23821570	23821571	ELAVL2	1993	4491	CGI	TRUE	TRUE	FALSE
cg13469590	chr9	19229767	19229768	DENND4C	55667	-60933	CGI-N-Shore	FALSE	FALSE	TRUE
cg13515842	chr9	127215440	127215441	GPR144	347088	2016	CGI	TRUE	TRUE	FALSE
cg13541429	chr9	94711818	94711819	ROR2	4920	624	CGI	TRUE	TRUE	FALSE
cg13632816	chr9	113341925	113341926	SVEP1	79987	233	CGI	TRUE	FALSE	FALSE
cg13679303	chr9	96623674	96623675	MIR4291	100422927	42034	CGI-S-Shore	FALSE	FALSE	TRUE
cg13746854	chr9	34370894	34370895	KIAA1161	57462	5998	CGI	FALSE	TRUE	FALSE
cg13811417	chr9	25677628	25677629	TUSC1	286319	1226	CGI	TRUE	FALSE	FALSE
cg13877502	chr9	707387	707388	DMRT1	1761	-134301	CGI-S-Shore	FALSE	TRUE	FALSE
cg13894301	chr9	110252451	110252452	KLF4	9314	-403	CGI	TRUE	FALSE	FALSE
cg14071579	chr9	126794830	126794831	LHX2	9355	20940	CGI	FALSE	TRUE	FALSE
cg14080967	chr9	8857491	8857492	C9orf123	90871	-1057691	CGI	TRUE	TRUE	FALSE
cg14095101	chr9	77502747	77502748	TRPM6	140803	261	CGI-S-Shore	TRUE	FALSE	FALSE
cg14123942	chr9	104500322	104500323	GRIN3A	116443	538	CGI	TRUE	FALSE	FALSE
cg14185918	chr9	110249966	110249967	KLF4	9314	2079	CGI	TRUE	TRUE	FALSE
cg14194263	chr9	136075669	136075670	OBP2B	29989	8957	CGI	FALSE	FALSE	TRUE
cg14201635	chr9	124030411	124030412	RAB14	51552	-66045	CGI	TRUE	TRUE	FALSE
cg14215338	chr9	132381976	132381977	C9orf50	375759	1077	CGI-N-Shore	FALSE	TRUE	FALSE
cg14299940	chr9	131684923	131684924	PHYHD1	254295	1748	CGI	FALSE	TRUE	FALSE
cg14347199	chr9	91150537	91150538	NXNL2	158046	520	CGI	TRUE	FALSE	FALSE
cg14430542	chr9	79637457	79637458	FOXB2	442425	2885	CGI-S-Shore	FALSE	FALSE	TRUE
cg14625731	chr9	38672608	38672609	FAM201A	158228	51522	CGI	FALSE	FALSE	TRUE
cg14633455	chr9	115819158	115819159	ZFP37	7539	-161	CGI	TRUE	FALSE	FALSE
cg21159778	chr9	117266918	117266919	DFNB31	25861	816	CGI	TRUE	FALSE	FALSE
cg21170041	chr9	74764428	74764429	GDA	9615	34916	CGI	TRUE	TRUE	FALSE
cg21215550	chr9	969544	969545	DMRT3	58524	-7418	CGI	FALSE	FALSE	TRUE
cg21250721	chr9	140056227	140056228	MIR3621	100500811	7493	CGI	FALSE	TRUE	FALSE
cg22068044	chr9	140095070	140095071	TPRN	286262	91	CGI	TRUE	FALSE	FALSE
cg00067824	chr10	23492914	23492915	PTF1A	256297	11453	CGI	FALSE	FALSE	TRUE
cg00157668	chr10	109674526	109674527	SORCS1	114815	-750059	CGI	FALSE	FALSE	TRUE
cg00158122	chr10	101290029	101290030	NKX2-3	159296	-2659	CGI	FALSE	TRUE	FALSE
cg00212988	chr10	95326311	95326312	FFAR4	338557	-109	CGI	TRUE	FALSE	FALSE
cg00487187	chr10	94451625	94451626	HHEX	3087	1943	CGI	FALSE	TRUE	FALSE
cg02072538	chr10	103326310	103326311	POLL	27343	21715	CGI	FALSE	FALSE	TRUE
cg02286717	chr10	75415704	75415705	SYNPO2L	79933	126	Non-CGI	TRUE	FALSE	FALSE
cg02306630	chr10	134600477	134600478	NKX6-2	84504	-939	CGI	TRUE	FALSE	FALSE
cg02441467	chr10	135122875	135122876	PRAP1	118471	-17	CGI	TRUE	TRUE	FALSE
cg02477603	chr10	125034296	125034297	BUB3	9184	120535	CGI	FALSE	FALSE	TRUE
cg02798576	chr10	101290168	101290169	NKX2-3	159296	-2520	CGI	FALSE	TRUE	FALSE
cg02952711	chr10	134145586	134145587	LRRC27	80313	-26	CGI	TRUE	TRUE	FALSE
cg03020810	chr10	102890984	102890985	TLX1	3195	-75	CGI	TRUE	FALSE	FALSE
cg03070297	chr10	128994603	128994604	FAM196A	642938	-180	CGI	TRUE	TRUE	FALSE
cg03476087	chr10	26506353	26506354	GAD2	2572	1116	CGI	FALSE	TRUE	FALSE
cg03846926	chr10	21807211	21807212	SKIDA1	387640	7398	CGI	TRUE	TRUE	FALSE
cg03876032	chr10	26501065	26501066	GAD2	2572	-4169	CGI	FALSE	TRUE	FALSE
cg04105282	chr10	99790170	99790171	CRTAC1	55118	413	CGI	FALSE	TRUE	FALSE
cg04339613	chr10	131757303	131757304	EBF3	253738	4786	CGI	FALSE	TRUE	FALSE
cg04564481	chr10	94820954	94820955	CYP26C1	340665	-65	CGI	TRUE	FALSE	FALSE
cg04757081	chr10	65424432	65424433	REEP3	221035	143308	CGI-N-Shore	FALSE	FALSE	TRUE
cg04760117	chr10	75900017	75900018	AP3M1	26985	10807	Non-CGI	FALSE	TRUE	FALSE
cg05583020	chr10	71336947	71336948	NEUROG3	50674	-3736	CGI	FALSE	FALSE	TRUE
cg05608777	chr10	128594144	128594145	DOCK1	1793	120	CGI	FALSE	TRUE	FALSE
cg05621401	chr10	43572065	43572066	RET	5979	-450	CGI	TRUE	FALSE	FALSE
cg05638174	chr10	122739236	122739237	WDR11-AS1	283089	-128544	CGI	FALSE	FALSE	TRUE
cg05667348	chr10	118892581	118892582	VAX1	11023	5229	CGI	FALSE	TRUE	FALSE
cg06382559	chr10	102896640	102896641	TLX1	3195	5578	CGI	FALSE	TRUE	FALSE
cg06511917	chr10	23482255	23482256	PTF1A	256297	794	CGI	FALSE	TRUE	FALSE
cg06525651	chr10	128994297	128994298	FAM196A	642938	123	CGI	TRUE	TRUE	FALSE
cg06737561	chr10	50821518	50821519	SLC18A3	6572	3170	CGI	TRUE	TRUE	FALSE
cg07028396	chr10	93805682	93805683	BTAF1	9044	121945	CGI	FALSE	FALSE	TRUE
cg07099331	chr10	102419617	102419618	PAX2	5076	-85849	CGI-S-Shore	FALSE	FALSE	TRUE
cg07560825	chr10	112836681	112836682	ADRA2A	150	-107	CGI	TRUE	FALSE	FALSE
cg07790279	chr10	125851132	125851133	CHST15	51363	2072	CGI-N-Shore	FALSE	TRUE	FALSE
cg08321048	chr10	133951963	133951964	JAKMIP3	282973	33649	CGI	FALSE	TRUE	FALSE
cg08382774	chr10	134600491	134600492	NKX6-2	84504	-953	CGI	TRUE	FALSE	FALSE
cg08441806	chr10	134599149	134599150	NKX6-2	84504	386	CGI	TRUE	FALSE	FALSE
cg08457232	chr10	1135600	1135601	IDI1	3422	-32955	CGI-N-Shore	TRUE	TRUE	FALSE
cg08504448	chr10	103880659	103880660	LDB1	8861	-448	CGI-S-Shore	TRUE	FALSE	FALSE
cg08506026	chr10	3419922	3419923	PITRM1	10531	-204888	CGI	FALSE	TRUE	FALSE
cg08696727	chr10	28034797	28034798	MKX	283078	-18	CGI	TRUE	FALSE	FALSE
cg08710410	chr10	134692509	134692510	NA	255352	63578	CGI-N-Shore	FALSE	TRUE	FALSE
cg08722774	chr10	71338423	71338424	NEUROG3	50674	-5212	CGI	FALSE	FALSE	TRUE
cg08812555	chr10	54074788	54074789	DKK1	22943	746	CGI	TRUE	TRUE	FALSE
cg09135551	chr10	63212862	63212863	TMEM26	219623	344	CGI	TRUE	FALSE	FALSE
cg09210519	chr10	105452352	105452353	LOC100505839	100505839	-54183	CGI	FALSE	TRUE	FALSE
cg09233392	chr10	50887488	50887489	C10orf53	282966	-194	CGI	TRUE	TRUE	FALSE
cg09261793	chr10	1215440	1215441	LINC00200	399706	9731	CGI-S-Shore	FALSE	FALSE	TRUE
cg09402276	chr10	50887472	50887473	C10orf53	282966	-210	CGI	TRUE	TRUE	FALSE
cg09403666	chr10	23461493	23461494	PTF1A	256297	-19965	CGI	FALSE	FALSE	TRUE
cg09465786	chr10	54074743	54074744	DKK1	22943	701	CGI	TRUE	TRUE	FALSE
cg09614415	chr10	129535509	129535510	FOXI2	399823	-27	CGI	TRUE	FALSE	FALSE
cg09684112	chr10	13701447	13701448	PRPF18	8559	72507	CGI-S-Shore	FALSE	TRUE	FALSE
cg09718371	chr10	133932351	133932352	JAKMIP3	282973	14037	CGI	FALSE	TRUE	FALSE
cg10297491	chr10	11059677	11059678	CELF2	10659	12417	CGI	TRUE	TRUE	FALSE
cg10401879	chr10	83634276	83634277	NRG3	10718	-792	CGI	TRUE	FALSE	FALSE
cg10420161	chr10	102899983	102899984	TLX1	3195	8921	CGI	FALSE	FALSE	TRUE
cg10530889	chr10	93805590	93805591	BTAF1	9044	121853	CGI	FALSE	FALSE	TRUE
cg10778841	chr10	106401319	106401320	SORCS3	22986	459	CGI	TRUE	FALSE	FALSE
cg11079048	chr10	118765220	118765221	KIAA1598	57698	120875	CGI-S-Shore	TRUE	TRUE	FALSE
cg11171221	chr10	124902844	124902845	HMX2	3167	-4792	CGI	FALSE	FALSE	TRUE
cg11174855	chr10	134598352	134598353	NKX6-2	84504	1183	CGI	FALSE	TRUE	FALSE
cg11398452	chr10	118896755	118896756	VAX1	11023	1055	CGI	FALSE	TRUE	FALSE
cg12093371	chr10	130339316	130339317	MKI67	4288	-414847	CGI	FALSE	FALSE	TRUE
cg12204732	chr10	128994605	128994606	FAM196A	642938	-182	CGI	TRUE	TRUE	FALSE
cg12451837	chr10	35119627	35119628	PARD3	56288	-15373	Non-CGI	FALSE	FALSE	TRUE
cg12523878	chr10	72238622	72238623	PALD1	27143	57	CGI	TRUE	FALSE	FALSE
cg12590721	chr10	7860546	7860547	TAF3	83860	-125	CGI	TRUE	FALSE	FALSE
cg12624829	chr10	106113175	106113176	CCDC147	159686	-345	CGI	TRUE	FALSE	FALSE
cg12626698	chr10	135381851	135381852	SYCE1	93426	1023	CGI	FALSE	TRUE	FALSE
cg12646649	chr10	102987257	102987258	LBX1	10660	1458	CGI	FALSE	TRUE	FALSE
cg12656653	chr10	13771427	13771428	PRPF18	8559	142487	Non-CGI	FALSE	TRUE	FALSE
cg12816961	chr10	134598927	134598928	NKX6-2	84504	608	CGI	FALSE	TRUE	FALSE
cg12835048	chr10	123357606	123357607	FGFR2	2263	364	CGI	TRUE	FALSE	FALSE
cg13750264	chr10	134910540	134910541	GPR123	84435	26106	CGI	FALSE	TRUE	FALSE
cg14084091	chr10	77168916	77168917	ZNF503	84858	-7402	CGI	FALSE	FALSE	TRUE
cg14440102	chr10	124668894	124668895	FAM24A	118670	-1321	Non-CGI	TRUE	FALSE	FALSE
cg14506196	chr10	101295400	101295401	NKX2-3	159296	2709	CGI	FALSE	TRUE	FALSE
cg14676407	chr10	125651370	125651371	CPXM2	119587	48407	CGI	TRUE	TRUE	FALSE
cg14789214	chr10	103589138	103589139	LOC100289509	100289509	10312	CGI	TRUE	TRUE	FALSE
cg14972210	chr10	106340238	106340239	SORCS3	22986	-60619	CGI	FALSE	FALSE	TRUE
cg15286044	chr10	99789971	99789972	CRTAC1	55118	612	CGI	FALSE	TRUE	FALSE
cg15475851	chr10	105037349	105037350	INA	9118	428	CGI	TRUE	FALSE	FALSE
cg15533453	chr10	2542242	2542243	LINC00701	399708	-184973	CGI-N-Shore	FALSE	FALSE	TRUE
cg15833704	chr10	81151215	81151216	PPIF	10105	43994	Non-CGI	FALSE	TRUE	FALSE
cg15838054	chr10	102747180	102747181	MRPL43	84545	90	CGI	TRUE	FALSE	FALSE
cg15920379	chr10	114886678	114886679	TCF7L2	6934	176668	CGI	FALSE	TRUE	FALSE
cg16043357	chr10	118897904	118897905	VAX1	11023	-91	CGI	TRUE	FALSE	FALSE
cg16063747	chr10	119294173	119294174	EMX2	2018	-7781	CGI	FALSE	TRUE	FALSE
cg16459735	chr10	134999791	134999792	KNDC1	85442	25819	CGI	FALSE	TRUE	FALSE
cg16827475	chr10	131767526	131767527	EBF3	253738	-5434	CGI	FALSE	FALSE	TRUE
cg16936421	chr10	729226	729227	DIP2C	22982	6380	CGI-N-Shore	FALSE	TRUE	FALSE
cg16949120	chr10	134599783	134599784	NKX6-2	84504	-245	CGI	TRUE	FALSE	FALSE
cg17183432	chr10	102984681	102984682	LBX1	10660	4034	CGI	FALSE	FALSE	TRUE
cg17259183	chr10	134599984	134599985	NKX6-2	84504	-446	CGI-S-Shore	TRUE	FALSE	FALSE
cg17307442	chr10	119302053	119302054	EMX2	2018	96	CGI	TRUE	TRUE	FALSE
cg17508300	chr10	100992656	100992657	HPSE2	60495	2974	CGI	FALSE	TRUE	FALSE
cg17566118	chr10	8095797	8095798	GATA3-AS1	399717	-349	CGI	TRUE	FALSE	FALSE
cg17940587	chr10	89292231	89292232	MINPP1	9562	28007	Non-CGI	FALSE	TRUE	FALSE
cg17996619	chr10	134600701	134600702	NKX6-2	84504	-1163	CGI	TRUE	FALSE	FALSE
cg18932726	chr10	128594141	128594142	DOCK1	1793	117	CGI	FALSE	TRUE	FALSE
cg19229344	chr10	101294643	101294644	NKX2-3	159296	1952	CGI	FALSE	TRUE	FALSE
cg19904058	chr10	135279010	135279011	LOC619207	619207	11577	CGI	FALSE	TRUE	FALSE
cg20087519	chr10	135379242	135379243	SYCE1	93426	3632	CGI	TRUE	TRUE	FALSE
cg20185017	chr10	18429661	18429662	CACNB2	783	54	CGI	TRUE	FALSE	FALSE
cg20589815	chr10	47656205	47656206	ANTXRL	195977	-2027	CGI	FALSE	FALSE	TRUE
cg21096915	chr10	42971209	42971210	LINC00839	84856	269	CGI	TRUE	FALSE	FALSE
cg22665692	chr10	128593943	128593944	DOCK1	1793	-78	CGI	TRUE	FALSE	FALSE
cg22775138	chr10	135008819	135008820	KNDC1	85442	34847	CGI	TRUE	TRUE	FALSE
cg23068913	chr10	23463377	23463378	PTF1A	256297	-18081	CGI	FALSE	FALSE	TRUE
cg23751407	chr10	122739127	122739128	WDR11-AS1	283089	-128435	CGI	FALSE	FALSE	TRUE
cg23803337	chr10	122739002	122739003	WDR11-AS1	283089	-128310	CGI	FALSE	FALSE	TRUE
cg23901444	chr10	49812963	49812964	ARHGAP22	58504	51345	CGI	TRUE	TRUE	FALSE
cg23944251	chr10	25464719	25464720	GPR158	57512	428	CGI	TRUE	FALSE	FALSE
cg24068468	chr10	5488535	5488536	NET1	10276	34016	CGI-N-Shore	TRUE	TRUE	FALSE
cg24252925	chr10	116854028	116854029	ATRNL1	26033	903	CGI	FALSE	TRUE	FALSE
cg24427089	chr10	72432550	72432551	ADAMTS14	140766	-7	CGI	TRUE	FALSE	FALSE
cg24457649	chr10	73472344	73472345	C10orf105	414152	25235	Non-CGI	TRUE	TRUE	FALSE
cg24488891	chr10	25464132	25464133	GPR158	57512	-156	CGI	TRUE	TRUE	FALSE
cg24566400	chr10	95361208	95361209	RBP4	5950	-214	CGI	TRUE	FALSE	FALSE
cg24898738	chr10	134938144	134938145	KNDC1	85442	-35825	CGI	FALSE	TRUE	FALSE
cg25497250	chr10	95326974	95326975	FFAR4	338557	551	CGI	TRUE	FALSE	FALSE
cg25553466	chr10	133945935	133945936	JAKMIP3	282973	27621	CGI-N-Shore	FALSE	TRUE	FALSE
cg25684999	chr10	23480803	23480804	PTF1A	256297	-655	CGI	TRUE	FALSE	FALSE
cg25835226	chr10	88149632	88149633	GRID1	2894	-23381	CGI	FALSE	FALSE	TRUE
cg25889711	chr10	102473609	102473610	PAX2	5076	-31857	CGI-S-Shore	FALSE	FALSE	TRUE
cg26365014	chr10	134622019	134622020	NKX6-2	84504	-22481	CGI-S-Shore	FALSE	TRUE	FALSE
cg26392708	chr10	6170926	6170927	PFKFB3	5209	-15915	Non-CGI	FALSE	FALSE	TRUE
cg26808747	chr10	128077376	128077377	ADAM12	8038	-248	CGI	TRUE	FALSE	FALSE
cg27003782	chr10	125651391	125651392	CPXM2	119587	48386	CGI	TRUE	TRUE	FALSE
cg27119456	chr10	42863173	42863174	LOC441666	441666	318	CGI	FALSE	TRUE	FALSE
cg27315773	chr10	134791549	134791550	NA	255352	-35459	CGI	FALSE	FALSE	TRUE
cg27533288	chr10	118896776	118896777	VAX1	11023	1034	CGI	FALSE	TRUE	FALSE
cg00232735	chr11	132934139	132934140	OPCML	4978	468262	CGI	FALSE	TRUE	FALSE
cg00322927	chr11	132707687	132707688	OPCML	4978	694714	Non-CGI	FALSE	TRUE	FALSE
cg00447817	chr11	70484490	70484491	MIR3664	100500844	233981	Non-CGI	FALSE	TRUE	FALSE
cg00496961	chr11	102638706	102638707	MMP10	4319	12651	CGI	FALSE	FALSE	TRUE
cg00566635	chr11	130298267	130298268	ADAMTS8	11095	270	CGI	TRUE	FALSE	FALSE
cg01558492	chr11	47291501	47291502	MADD	8567	573	CGI	TRUE	TRUE	FALSE
cg01583131	chr11	27744675	27744676	BDNF	627	-1069	CGI	TRUE	FALSE	FALSE
cg01642521	chr11	20618250	20618251	SLC6A5	9152	-2694	CGI	FALSE	FALSE	TRUE
cg01846046	chr11	64034019	64034020	PLCB3	5331	15023	CGI-S-Shelf	FALSE	TRUE	FALSE
cg01923218	chr11	93063888	93063889	CCDC67	159989	731	CGI	TRUE	TRUE	FALSE
cg02218884	chr11	627582	627583	SCT	6343	-408	CGI	TRUE	FALSE	FALSE
cg02344527	chr11	102702414	102702415	MMP3	4314	11926	CGI	FALSE	TRUE	FALSE
cg02346860	chr11	507341	507342	RNH1	6050	-57	CGI	TRUE	FALSE	FALSE
cg02907374	chr11	15095028	15095029	CALCB	797	-116	CGI	TRUE	FALSE	FALSE
cg02928699	chr11	88241946	88241947	CTSC	1075	-171004	CGI	FALSE	TRUE	FALSE
cg02967152	chr11	64014589	64014590	PPP1R14B	26472	-175	CGI	TRUE	FALSE	FALSE
cg03076073	chr11	64009400	64009401	FKBP2	2286	986	CGI	TRUE	TRUE	FALSE
cg03102386	chr11	128746438	128746439	KCNJ1	3758	-9169	CGI	FALSE	FALSE	TRUE
cg03200166	chr11	61335254	61335255	SYT7	9066	13088	CGI	FALSE	TRUE	FALSE
cg03442545	chr11	68228164	68228165	PPP6R3	55291	-20	CGI	TRUE	FALSE	FALSE
cg03499808	chr11	73020459	73020460	ARHGEF17	9828	795	CGI	TRUE	FALSE	FALSE
cg03919694	chr11	19735068	19735069	LOC100126784	100126784	1148	CGI	TRUE	TRUE	FALSE
cg04102296	chr11	113143682	113143683	LOC100288346	100288346	939	CGI-N-Shore	TRUE	TRUE	FALSE
cg04226536	chr11	111411071	111411072	LAYN	143903	-160	CGI	TRUE	FALSE	FALSE
cg04433151	chr11	3078265	3078266	CARS	833	414	CGI	FALSE	TRUE	FALSE
cg04499648	chr11	17740887	17740888	MYOD1	4654	-221	CGI	TRUE	FALSE	FALSE
cg04609163	chr11	125774090	125774091	DDX25	29118	-180	CGI	TRUE	FALSE	FALSE
cg05116382	chr11	66327000	66327001	CTSF	8722	9045	CGI	FALSE	TRUE	FALSE
cg05283631	chr11	537476	537477	LRRC56	115399	-44	CGI	TRUE	FALSE	FALSE
cg05454619	chr11	79148502	79148503	TENM4	26011	3191	CGI	FALSE	TRUE	FALSE
cg05475524	chr11	66326798	66326799	CTSF	8722	9247	CGI	TRUE	TRUE	FALSE
cg05774787	chr11	63997720	63997721	DNAJC4	3338	-31	CGI	TRUE	FALSE	FALSE
cg06130072	chr11	1036714	1036715	MUC6	4588	-7	CGI	TRUE	FALSE	FALSE
cg06341513	chr11	61277017	61277018	LRRC10B	390205	744	CGI	TRUE	FALSE	FALSE
cg06719900	chr11	109292894	109292895	C11orf87	399947	47	CGI	TRUE	FALSE	FALSE
cg06745695	chr11	68519060	68519061	MTL5	9633	-71	CGI	TRUE	FALSE	FALSE
cg06766960	chr11	133703094	133703095	SPATA19	219938	12296	CGI	FALSE	FALSE	TRUE
cg06978117	chr11	111155014	111155015	C11orf93	120376	-14960	CGI	FALSE	TRUE	FALSE
cg07110405	chr11	70917533	70917534	SHANK2	22941	18307	CGI	FALSE	TRUE	FALSE
cg07132517	chr11	842517	842518	POLR2L	5441	10	CGI	TRUE	FALSE	FALSE
cg07250758	chr11	61049251	61049252	VWCE	220001	13535	CGI	FALSE	TRUE	FALSE
cg07315745	chr11	129245707	129245708	BARX2	8538	-172	CGI-S-Shore	TRUE	FALSE	FALSE
cg07326438	chr11	57194562	57194563	SLC43A3	29015	489	CGI	TRUE	TRUE	FALSE
cg07415423	chr11	120387622	120387623	GRIK4	2900	5153	CGI	FALSE	TRUE	FALSE
cg07428372	chr11	67169531	67169532	TBC1D10C	374403	-1853	CGI-S-Shore	TRUE	TRUE	FALSE
cg07434271	chr11	31840698	31840699	PAX6	5080	-1188	CGI	TRUE	TRUE	FALSE
cg08134631	chr11	61355317	61355318	SYT7	9066	-6972	CGI	TRUE	FALSE	FALSE
cg08356637	chr11	8385767	8385768	LMO1	4004	-95584	CGI	FALSE	FALSE	TRUE
cg08490115	chr11	30038675	30038676	KCNA4	3739	-97	CGI	TRUE	FALSE	FALSE
cg08668551	chr11	126873181	126873182	KIRREL3	84623	172	CGI	TRUE	FALSE	FALSE
cg08728297	chr11	72853526	72853527	FCHSD2	9873	-382	CGI	TRUE	FALSE	FALSE
cg08804111	chr11	102638778	102638779	MMP10	4319	12579	CGI	FALSE	FALSE	TRUE
cg08924469	chr11	66062710	66062711	TMEM151A	256472	3336	CGI	FALSE	TRUE	FALSE
cg09251429	chr11	124735128	124735129	ROBO3	64221	-175	CGI	TRUE	FALSE	FALSE
cg09441501	chr11	798350	798351	SLC25A22	79751	-80	CGI	TRUE	FALSE	FALSE
cg09557556	chr11	17760574	17760575	KCNC1	3746	3078	CGI-S-Shelf	FALSE	TRUE	FALSE
cg09607276	chr11	637491	637492	DRD4	1815	185	CGI	TRUE	FALSE	FALSE
cg09618778	chr11	66838934	66838935	RHOD	29984	14644	CGI	FALSE	TRUE	FALSE
cg10313947	chr11	124622815	124622816	VSIG2	23584	-705	CGI-S-Shore	TRUE	TRUE	FALSE
cg10366093	chr11	57414457	57414458	YPEL4	219539	2958	CGI-N-Shore	FALSE	TRUE	FALSE
cg10387551	chr11	30038615	30038616	KCNA4	3739	-37	CGI	TRUE	FALSE	FALSE
cg11660146	chr11	120110688	120110689	POU2F3	25833	3338	CGI	TRUE	TRUE	FALSE
cg11805450	chr11	123447841	123447842	GRAMD1B	57476	51312	CGI-N-Shore	FALSE	TRUE	FALSE
cg12161228	chr11	89224506	89224507	NOX4	50507	98271	CGI	TRUE	TRUE	FALSE
cg12164612	chr11	30037833	30037834	KCNA4	3739	742	CGI	FALSE	TRUE	FALSE
cg12198813	chr11	2891077	2891078	KCNQ1DN	55539	-184	CGI	TRUE	FALSE	FALSE
cg12587386	chr11	119020099	119020100	ABCG4	64137	348	CGI	TRUE	TRUE	FALSE
cg12716639	chr11	119234198	119234199	C1QTNF5	114902	-16814	CGI	FALSE	TRUE	FALSE
cg12764221	chr11	2883698	2883699	KCNQ1DN	55539	-7563	CGI	FALSE	FALSE	TRUE
cg12821804	chr11	2890705	2890706	KCNQ1DN	55539	-556	CGI	TRUE	FALSE	FALSE
cg12832726	chr11	68096165	68096166	LRP5	4041	16056	CGI	FALSE	TRUE	FALSE
cg13228701	chr11	78614522	78614523	NARS2	79731	-328612	CGI	FALSE	TRUE	FALSE
cg13392793	chr11	69533448	69533449	FGF19	9965	-14341	CGI-S-Shelf	FALSE	FALSE	TRUE
cg13449967	chr11	64684301	64684302	ATG2A	23130	419	CGI	FALSE	TRUE	FALSE
cg13455439	chr11	69934128	69934129	ANO1	55107	9719	CGI	FALSE	TRUE	FALSE
cg13473196	chr11	46848312	46848313	CKAP5	9793	19545	CGI	FALSE	TRUE	FALSE
cg13570972	chr11	31839632	31839633	PAX6	5080	-122	CGI	TRUE	TRUE	FALSE
cg13696942	chr11	20180666	20180667	DBX1	120237	1202	CGI	FALSE	TRUE	FALSE
cg13747681	chr11	66179783	66179784	NPAS4	266743	-8690	CGI-S-Shelf	FALSE	FALSE	TRUE
cg14130459	chr11	60718568	60718569	SLC15A3	51296	687	CGI	TRUE	FALSE	FALSE
cg14243481	chr11	7272867	7272868	SYT9	143425	12857	CGI	TRUE	TRUE	FALSE
cg14538048	chr11	64546161	64546162	SF1	7536	153	CGI	TRUE	FALSE	FALSE
cg14642374	chr11	207688	207689	BET1L	51272	-265	CGI	TRUE	FALSE	FALSE
cg14689623	chr11	20691161	20691162	NELL1	4745	43	CGI	TRUE	FALSE	FALSE
cg14698297	chr11	66511920	66511921	C11orf80	79703	-285	CGI	TRUE	FALSE	FALSE
cg14699728	chr11	66188522	66188523	NPAS4	266743	46	CGI	TRUE	FALSE	FALSE
cg14797402	chr11	58673453	58673454	GLYATL1	92292	-21647	CGI	FALSE	TRUE	FALSE
cg15005677	chr11	45918197	45918198	C11orf94	143678	10634	CGI-N-Shelf	TRUE	TRUE	FALSE
cg15047774	chr11	123067275	123067276	CLMP	79827	-1267	CGI-S-Shore	TRUE	FALSE	FALSE
cg15214183	chr11	67232269	67232270	TMEM134	80194	4460	CGI	FALSE	TRUE	FALSE
cg15310492	chr11	30038677	30038678	KCNA4	3739	-99	CGI	TRUE	FALSE	FALSE
cg15617814	chr11	131780492	131780493	NTM	50863	540120	CGI	TRUE	TRUE	FALSE
cg15681626	chr11	64739253	64739254	C11orf85	283129	302	CGI	FALSE	TRUE	FALSE
cg16143578	chr11	124767801	124767802	ROBO4	54538	28	Non-CGI	TRUE	FALSE	FALSE
cg16425592	chr11	842748	842749	TSPAN4	7106	-74	CGI	TRUE	FALSE	FALSE
cg16543094	chr11	20229517	20229518	DBX1	120237	-47646	CGI	FALSE	FALSE	TRUE
cg16922279	chr11	71955439	71955440	PHOX2A	401	-218	CGI	TRUE	FALSE	FALSE
cg17071639	chr11	125365478	125365479	FEZ1	9638	726	CGI	TRUE	TRUE	FALSE
cg17176573	chr11	120110887	120110888	POU2F3	25833	3537	CGI	TRUE	TRUE	FALSE
cg17279359	chr11	17565744	17565745	USH1C	10083	217	CGI-N-Shore	FALSE	TRUE	FALSE
cg17714025	chr11	30038619	30038620	KCNA4	3739	-41	CGI	TRUE	FALSE	FALSE
cg17978903	chr11	101981422	101981423	YAP1	10413	229	CGI	TRUE	FALSE	FALSE
cg18097532	chr11	17498541	17498542	ABCC8	6833	-91	CGI	TRUE	FALSE	FALSE
cg18395917	chr11	76033367	76033368	PRKRIR	5612	58511	CGI	FALSE	FALSE	TRUE
cg18547942	chr11	111170390	111170391	C11orf93	120376	413	CGI	TRUE	TRUE	FALSE
cg18778433	chr11	12399176	12399177	PARVA	55742	149	CGI	TRUE	FALSE	FALSE
cg18854419	chr11	91957989	91957990	FAT3	120114	-127271	CGI	FALSE	FALSE	TRUE
cg18987410	chr11	124791197	124791198	HEPN1	641654	2050	CGI	FALSE	TRUE	FALSE
cg18988498	chr11	31824262	31824263	DKFZp686K1684	440034	-13850	CGI-N-Shore	FALSE	TRUE	FALSE
cg19075239	chr11	9335949	9335950	TMEM41B	440026	364	CGI	TRUE	FALSE	FALSE
cg19558933	chr11	134632242	134632243	LOC283177	283177	350041	CGI	FALSE	TRUE	FALSE
cg19695805	chr11	9385645	9385646	IPO7	10527	-20522	CGI-N-Shore	FALSE	FALSE	TRUE
cg19752094	chr11	76381800	76381801	LRRC32	2615	-8	CGI	TRUE	FALSE	FALSE
cg19947104	chr11	17757342	17757343	KCNC1	3746	-151	CGI	TRUE	FALSE	FALSE
cg20092736	chr11	67982703	67982704	SUV420H1	51111	-1634	CGI	TRUE	FALSE	FALSE
cg20289688	chr11	17742502	17742503	MYOD1	4654	1391	CGI	FALSE	TRUE	FALSE
cg20374054	chr11	124735126	124735127	ROBO3	64221	-177	CGI	TRUE	FALSE	FALSE
cg20596329	chr11	67895842	67895843	CHKA	1119	-6983	CGI	FALSE	FALSE	TRUE
cg21606329	chr11	369160	369161	B4GALNT4	338707	-633	CGI	TRUE	FALSE	FALSE
cg21806242	chr11	72532891	72532892	ATG16L2	89849	7439	CGI	FALSE	TRUE	FALSE
cg21893358	chr11	120434880	120434881	GRIK4	2900	52411	CGI	TRUE	TRUE	FALSE
cg21957174	chr11	64511624	64511625	RASGRP2	10235	1302	CGI	TRUE	TRUE	FALSE
cg21971621	chr11	65600773	65600774	SNX32	254122	-635	CGI-N-Shore	TRUE	FALSE	FALSE
cg22031964	chr11	62677251	62677252	CHRM1	1128	11759	CGI-N-Shore	TRUE	TRUE	FALSE
cg22216413	chr11	26353618	26353619	ANO3	63982	142788	CGI	TRUE	TRUE	FALSE
cg22346124	chr11	2291677	2291678	ASCL2	430	503	CGI	TRUE	FALSE	FALSE
cg22623062	chr11	44972293	44972294	TP53I11	9537	545	CGI	TRUE	TRUE	FALSE
cg22868518	chr11	507468	507469	RNH1	6050	-184	CGI	TRUE	FALSE	FALSE
cg22897141	chr11	64577338	64577339	MEN1	4221	1426	CGI	FALSE	TRUE	FALSE
cg23288099	chr11	115860986	115860987	LOC283143	283143	-229640	Non-CGI	FALSE	FALSE	TRUE
cg23598212	chr11	1769289	1769290	IFITM10	402778	2533	CGI	TRUE	TRUE	FALSE
cg23727983	chr11	125774082	125774083	DDX25	29118	-188	CGI	TRUE	FALSE	FALSE
cg23739457	chr11	117314707	117314708	CEP164	22897	122274	Non-CGI	FALSE	TRUE	FALSE
cg23881278	chr11	113346299	113346300	DRD2	1813	112	CGI	TRUE	TRUE	FALSE
cg23926688	chr11	64645578	64645579	EHD1	10938	1569	CGI	TRUE	TRUE	FALSE
cg23947039	chr11	27722037	27722038	BDNF	627	21566	CGI	TRUE	TRUE	FALSE
cg24057514	chr11	2293181	2293182	ASCL2	430	-998	CGI	TRUE	FALSE	FALSE
cg24359671	chr11	64030212	64030213	PLCB3	5331	11216	CGI	FALSE	TRUE	FALSE
cg24960947	chr11	65816463	65816464	GAL3ST3	89792	186	CGI-N-Shore	FALSE	TRUE	FALSE
cg25061131	chr11	73088293	73088294	RELT	84957	887	CGI-S-Shore	FALSE	TRUE	FALSE
cg25134909	chr11	47587211	47587212	PTPMT1	114971	228	CGI	TRUE	FALSE	FALSE
cg25739366	chr11	57004007	57004008	APLNR	187	918	CGI	TRUE	FALSE	FALSE
cg25896967	chr11	86666558	86666559	LOC100506368	100506368	-103	CGI	TRUE	FALSE	FALSE
cg26005578	chr11	13030676	13030677	RASSF10	644943	-292	CGI	TRUE	FALSE	FALSE
cg26142412	chr11	20185077	20185078	DBX1	120237	-3206	CGI	FALSE	FALSE	TRUE
cg26427818	chr11	15093613	15093614	CALCB	797	-1531	CGI	TRUE	FALSE	FALSE
cg26522297	chr11	115829838	115829839	LOC283143	283143	-198492	CGI	FALSE	FALSE	TRUE
cg26639216	chr11	1968316	1968317	MRPL23	6150	-184	CGI	TRUE	FALSE	FALSE
cg26730416	chr11	4233502	4233503	RRM1	6240	117577	CGI	FALSE	FALSE	TRUE
cg26945996	chr11	7272876	7272877	SYT9	143425	12866	CGI	TRUE	TRUE	FALSE
cg27207470	chr11	111848326	111848327	DLAT	1737	-47210	CGI	TRUE	TRUE	FALSE
cg27413462	chr11	14993866	14993867	CALCA	796	-33	CGI	TRUE	FALSE	FALSE
cg00450784	chr12	106979062	106979063	RFX4	5992	2376	CGI	FALSE	TRUE	FALSE
cg00567703	chr12	54413101	54413102	HOXC4	3221	2458	CGI	FALSE	TRUE	FALSE
cg00763151	chr12	98987211	98987212	SLC25A3	5250	-190	CGI	TRUE	FALSE	FALSE
cg00906926	chr12	113591276	113591277	CCDC42B	387885	3612	CGI	FALSE	TRUE	FALSE
cg00924143	chr12	114881676	114881677	TBX5	6910	-35428	CGI-N-Shore	FALSE	FALSE	TRUE
cg01184975	chr12	114852091	114852092	TBX5	6910	-5843	CGI	FALSE	FALSE	TRUE
cg01577751	chr12	54332222	54332223	HOXC13	3229	-352	CGI	TRUE	FALSE	FALSE
cg01759562	chr12	114917826	114917827	TBX5	6910	-71578	CGI	FALSE	FALSE	TRUE
cg02062409	chr12	98850881	98850882	SLC9A7P1	121456	40	CGI	TRUE	FALSE	FALSE
cg02276807	chr12	133022677	133022678	FBRSL1	57666	-44478	CGI	FALSE	FALSE	TRUE
cg02305765	chr12	53107910	53107911	KRT77	374454	-10662	CGI-N-Shore	FALSE	FALSE	TRUE
cg02385840	chr12	5539588	5539589	NTF3	4908	-1690	CGI-N-Shore	TRUE	FALSE	FALSE
cg02511156	chr12	72666264	72666265	TRHDE	29953	-263	CGI	TRUE	TRUE	FALSE
cg02801786	chr12	113914222	113914223	LHX5	64211	-4344	CGI	FALSE	FALSE	TRUE
cg02846648	chr12	129416689	129416690	GLT1D1	144423	78607	CGI	FALSE	TRUE	FALSE
cg02907098	chr12	6054362	6054363	ANO2	57101	1034	CGI	TRUE	TRUE	FALSE
cg03141007	chr12	122250518	122250519	SETD1B	23067	7879	CGI	FALSE	TRUE	FALSE
cg04598251	chr12	132628980	132628981	NOC4L	79050	-11	CGI	TRUE	FALSE	FALSE
cg04923020	chr12	46005007	46005008	LOC400027	400027	116695	CGI	FALSE	FALSE	TRUE
cg05181941	chr12	131171031	131171032	RIMBP2	23504	29793	CGI	FALSE	TRUE	FALSE
cg05600340	chr12	120524786	120524787	RAB35	11021	29855	CGI	FALSE	TRUE	FALSE
cg05932702	chr12	72148251	72148252	RAB21	23011	-405	CGI-N-Shore	TRUE	FALSE	FALSE
cg06003296	chr12	71003681	71003682	PTPRB	5787	27537	CGI	TRUE	TRUE	FALSE
cg06622999	chr12	72666281	72666282	TRHDE	29953	-246	CGI	TRUE	TRUE	FALSE
cg07106761	chr12	112205145	112205146	ALDH2	217	453	CGI	FALSE	TRUE	FALSE
cg07124520	chr12	59314266	59314267	LRIG3	121227	-3	CGI	TRUE	FALSE	FALSE
cg07147449	chr12	115136072	115136073	TBX3	6926	-14102	CGI	FALSE	FALSE	TRUE
cg07679219	chr12	77417738	77417739	E2F7	144455	41620	CGI	FALSE	TRUE	FALSE
cg07688604	chr12	133065928	133065929	FBRSL1	57666	-1227	CGI	TRUE	FALSE	FALSE
cg07780095	chr12	85674296	85674297	ALX1	8092	259	CGI	FALSE	TRUE	FALSE
cg08101375	chr12	104443925	104443926	GLT8D2	83468	14034	CGI	TRUE	TRUE	FALSE
cg08189171	chr12	6420023	6420024	PLEKHG6	55200	420	CGI	TRUE	TRUE	FALSE
cg08190858	chr12	54321346	54321347	HOXC13	3229	-11228	CGI	FALSE	FALSE	TRUE
cg08253651	chr12	96252105	96252106	SNRPF	6636	-602	CGI-S-Shore	TRUE	FALSE	FALSE
cg08545826	chr12	57963953	57963954	KIF5A	3798	20105	Non-CGI	FALSE	TRUE	FALSE
cg08575696	chr12	121087382	121087383	CABP1	9478	8959	CGI	TRUE	TRUE	FALSE
cg09168808	chr12	115124584	115124585	TBX3	6926	-2614	CGI	FALSE	FALSE	TRUE
cg09338032	chr12	113916609	113916610	LHX5	64211	-6731	CGI	FALSE	FALSE	TRUE
cg09418283	chr12	80084718	80084719	PAWR	5074	70	CGI	TRUE	FALSE	FALSE
cg09883286	chr12	95943114	95943115	USP44	84101	2147	CGI	TRUE	TRUE	FALSE
cg09887059	chr12	113916664	113916665	LHX5	64211	-6786	CGI	FALSE	FALSE	TRUE
cg09941406	chr12	54391325	54391326	HOXC9	3225	-2550	CGI	FALSE	FALSE	TRUE
cg10022966	chr12	34518957	34518958	ALG10	84920	343740	CGI	FALSE	FALSE	TRUE
cg10171063	chr12	29302231	29302232	FAR2	55711	0	CGI	TRUE	FALSE	FALSE
cg10588893	chr12	34464089	34464090	ALG10	84920	288872	CGI	FALSE	FALSE	TRUE
cg10638118	chr12	50135334	50135335	TMBIM6	7009	40	CGI	TRUE	FALSE	FALSE
cg10831607	chr12	115134374	115134375	TBX3	6926	-12404	CGI-N-Shore	FALSE	FALSE	TRUE
cg11224423	chr12	56136943	56136944	GDF11	10220	-119	CGI	TRUE	FALSE	FALSE
cg11258452	chr12	119594454	119594455	HSPB8	26353	-22139	CGI	FALSE	TRUE	FALSE
cg12150946	chr12	120755411	120755412	PLA2G1B	5319	10179	CGI	FALSE	FALSE	TRUE
cg12216208	chr12	6756377	6756378	ACRBP	84519	201	CGI	FALSE	TRUE	FALSE
cg13063344	chr12	132906443	132906444	GALNT9	50614	-537	CGI	TRUE	FALSE	FALSE
cg13188098	chr12	4918335	4918336	KCNA6	3742	-5	CGI	TRUE	FALSE	FALSE
cg13372458	chr12	95267153	95267154	KRT19P2	160313	38978	CGI	FALSE	FALSE	TRUE
cg13494509	chr12	123755018	123755019	CDK2AP1	8099	1667	CGI	FALSE	TRUE	FALSE
cg13560853	chr12	78710064	78710065	NAV3	89795	484994	Non-CGI	FALSE	FALSE	TRUE
cg13691247	chr12	54071090	54071091	ATP5G2	517	-577	CGI	TRUE	FALSE	FALSE
cg13718418	chr12	85672285	85672286	ALX1	8092	-1749	CGI	TRUE	FALSE	FALSE
cg14135814	chr12	119419329	119419330	SRRM4	84530	28	CGI	TRUE	FALSE	FALSE
cg14537533	chr12	52626904	52626905	KRT7	3855	-48	CGI	TRUE	FALSE	FALSE
cg14730445	chr12	101603581	101603582	SLC5A8	160728	433	CGI	TRUE	FALSE	FALSE
cg14882054	chr12	79257711	79257712	SYT1	6857	-60	CGI	TRUE	FALSE	FALSE
cg15074033	chr12	52652462	52652463	KRT86	3892	9377	CGI	TRUE	TRUE	FALSE
cg15416064	chr12	49209402	49209403	CACNB3	784	1186	CGI	TRUE	TRUE	FALSE
cg15532640	chr12	129554566	129554567	GLT1D1	144423	216484	Non-CGI	FALSE	FALSE	TRUE
cg15996644	chr12	54370352	54370353	HOXC11	3227	3441	CGI	FALSE	FALSE	TRUE
cg16264705	chr12	54071194	54071195	ATP5G2	517	-681	CGI	TRUE	FALSE	FALSE
cg16370398	chr12	54448913	54448914	FLJ12825	440101	-3123	CGI	FALSE	TRUE	FALSE
cg16945633	chr12	133170342	133170343	LRCOL1	100507055	16693	CGI-S-Shore	FALSE	FALSE	TRUE
cg16970851	chr12	22487658	22487659	ST8SIA1	6489	-9	CGI	TRUE	FALSE	FALSE
cg17222500	chr12	85306741	85306742	SLC6A15	55117	-134	CGI	TRUE	FALSE	FALSE
cg17316564	chr12	100557738	100557739	GOLGA2P5	55592	9381	Non-CGI	FALSE	TRUE	FALSE
cg17708016	chr12	54321992	54321993	HOXC13	3229	-10582	CGI	FALSE	FALSE	TRUE
cg17877704	chr12	127940483	127940484	FLJ37505	400087	-425677	CGI	FALSE	FALSE	TRUE
cg19085037	chr12	115106036	115106037	TBX3	6926	15931	CGI	FALSE	FALSE	TRUE
cg19524350	chr12	52431177	52431178	NR4A1	3164	14560	CGI	FALSE	TRUE	FALSE
cg19614504	chr12	54088760	54088761	ATP5G2	517	-18247	CGI-N-Shore	FALSE	FALSE	TRUE
cg19945931	chr12	133022760	133022761	FBRSL1	57666	-44395	CGI	FALSE	FALSE	TRUE
cg20048870	chr12	57399932	57399933	ZBTB39	9880	363	CGI	TRUE	TRUE	FALSE
cg20340866	chr12	54391631	54391632	HOXC9	3225	-2244	CGI-S-Shore	FALSE	FALSE	TRUE
cg20472745	chr12	80084972	80084973	PAWR	5074	-181	CGI	TRUE	FALSE	FALSE
cg20973476	chr12	133015982	133015983	FBRSL1	57666	-51173	CGI	FALSE	FALSE	TRUE
cg21051964	chr12	58022620	58022621	B4GALNT1	2583	4363	CGI	FALSE	TRUE	FALSE
cg21087137	chr12	75728469	75728470	GLIPR1L1	256710	5	CGI	TRUE	TRUE	FALSE
cg21361094	chr12	58021917	58021918	B4GALNT1	2583	5066	CGI	FALSE	TRUE	FALSE
cg21535462	chr12	75905660	75905661	KRR1	11103	-241	CGI	TRUE	FALSE	FALSE
cg21718267	chr12	113916473	113916474	LHX5	64211	-6595	CGI	FALSE	FALSE	TRUE
cg22125805	chr12	119212248	119212249	SRRM4	84530	-207050	CGI	FALSE	FALSE	TRUE
cg22219587	chr12	53845791	53845792	PCBP2	5094	10357	CGI	TRUE	TRUE	FALSE
cg22773899	chr12	114878163	114878164	TBX5	6910	-31915	CGI-S-Shore	FALSE	FALSE	TRUE
cg23342718	chr12	115135576	115135577	TBX3	6926	-13606	CGI	FALSE	FALSE	TRUE
cg23395715	chr12	54369514	54369515	HOXC11	3227	2603	CGI	FALSE	TRUE	FALSE
cg23667555	chr12	25403962	25403963	KRAS	3845	-98	CGI	TRUE	FALSE	FALSE
cg23877401	chr12	122017247	122017248	KDM2B	84678	1671	CGI	FALSE	TRUE	FALSE
cg23891273	chr12	102036400	102036401	MYBPC1	4604	47690	CGI	FALSE	TRUE	FALSE
cg24100636	chr12	3600087	3600088	PRMT8	56341	109571	CGI	TRUE	TRUE	FALSE
cg24234651	chr12	75728471	75728472	GLIPR1L1	256710	7	CGI	TRUE	TRUE	FALSE
cg24387367	chr12	132689907	132689908	NOC4L	79050	60913	CGI	FALSE	TRUE	FALSE
cg24570064	chr12	4140993	4140994	PARP11	57097	-158384	CGI	FALSE	FALSE	TRUE
cg24740218	chr12	114075947	114075948	LHX5	64211	-166069	CGI	FALSE	FALSE	TRUE
cg25094126	chr12	5541253	5541254	NTF3	4908	-25	CGI	TRUE	FALSE	FALSE
cg25313172	chr12	52627272	52627273	KRT7	3855	317	CGI	TRUE	FALSE	FALSE
cg25350087	chr12	133066492	133066493	FBRSL1	57666	-663	CGI	TRUE	FALSE	FALSE
cg25370039	chr12	132886849	132886850	GALNT9	50614	19054	CGI	FALSE	TRUE	FALSE
cg25382128	chr12	54346509	54346510	HOXC12	3228	-2203	CGI-S-Shore	FALSE	FALSE	TRUE
cg26469608	chr12	113913695	113913696	LHX5	64211	-3817	CGI	FALSE	FALSE	TRUE
cg26550872	chr12	69656319	69656320	MIR1279	100302182	10677	CGI	FALSE	TRUE	FALSE
cg26584545	chr12	96183197	96183198	NTN4	59277	1731	CGI-N-Shore	FALSE	TRUE	FALSE
cg26796518	chr12	6184516	6184517	VWF	7450	49318	CGI	FALSE	TRUE	FALSE
cg26922917	chr12	131622584	131622585	LOC116437	116437	-26970	CGI-N-Shore	FALSE	TRUE	FALSE
cg26926768	chr12	34528122	34528123	ALG10	84920	352905	CGI-S-Shore	FALSE	FALSE	TRUE
cg26931862	chr12	54349169	54349170	HOXC12	3228	454	CGI	TRUE	FALSE	FALSE
cg27311341	chr12	130680612	130680613	FZD10	11211	33607	CGI	FALSE	FALSE	TRUE
cg27549952	chr12	88974484	88974485	KITLG	4254	-233	CGI	TRUE	FALSE	FALSE
cg27630311	chr12	115120847	115120848	TBX3	6926	1120	CGI	TRUE	FALSE	FALSE
cg00191629	chr13	110439004	110439005	IRS2	8660	-89	CGI-S-Shore	TRUE	FALSE	FALSE
cg00247571	chr13	50707065	50707066	DLEU2	8847	-7387	CGI	FALSE	TRUE	FALSE
cg01077841	chr13	99228499	99228500	STK24	8428	895	CGI	FALSE	TRUE	FALSE
cg02247178	chr13	31506687	31506688	TEX26-AS1	100507064	56	CGI-N-Shore	TRUE	FALSE	FALSE
cg02320481	chr13	110438578	110438579	IRS2	8660	334	CGI	TRUE	FALSE	FALSE
cg02337614	chr13	112609986	112609987	SOX1	6656	-111925	CGI	FALSE	FALSE	TRUE
cg02626129	chr13	31480646	31480647	MEDAG	84935	333	CGI	TRUE	TRUE	FALSE
cg02811702	chr13	24901961	24901962	C1QTNF9	338872	18244	CGI-N-Shore	FALSE	FALSE	TRUE
cg03276408	chr13	112712475	112712476	SOX1	6656	-9436	CGI	FALSE	FALSE	TRUE
cg03371199	chr13	97646639	97646640	OXGR1	27199	-34	CGI	TRUE	FALSE	FALSE
cg03637815	chr13	95359718	95359719	SOX21	11166	4669	CGI	FALSE	FALSE	TRUE
cg03994318	chr13	109147921	109147922	MYO16	23026	-100577	CGI	FALSE	FALSE	TRUE
cg04047221	chr13	112723477	112723478	SOX1	6656	1563	CGI	TRUE	FALSE	FALSE
cg05850327	chr13	20768236	20768237	GJB2	2706	-1121	CGI	TRUE	FALSE	FALSE
cg06659727	chr13	110959428	110959429	COL4A1	1282	66	CGI	TRUE	FALSE	FALSE
cg07223990	chr13	108518179	108518180	FAM155A	728215	1279	CGI	TRUE	FALSE	FALSE
cg07416237	chr13	100548078	100548079	ZIC5	85416	76098	CGI-S-Shore	FALSE	TRUE	FALSE
cg08136772	chr13	53420933	53420934	PCDH8	5100	1840	CGI	TRUE	FALSE	FALSE
cg08379987	chr13	31507139	31507140	TEX26	122046	304	CGI-S-Shore	TRUE	TRUE	FALSE
cg09083627	chr13	88324597	88324598	SLITRK5	26050	-271	CGI	TRUE	FALSE	FALSE
cg09907509	chr13	37248244	37248245	SERTM1	400120	194	CGI	TRUE	FALSE	FALSE
cg12073754	chr13	28712514	28712515	PAN3	255967	-127	CGI	TRUE	TRUE	FALSE
cg12271981	chr13	88326752	88326753	SLITRK5	26050	1881	CGI	TRUE	TRUE	FALSE
cg12387009	chr13	20437885	20437886	ZMYM5	9205	-108	CGI	TRUE	FALSE	FALSE
cg13436155	chr13	100644217	100644218	ZIC2	7546	10190	CGI	FALSE	FALSE	TRUE
cg13614409	chr13	31506752	31506753	TEX26-AS1	100507064	-6	CGI-N-Shore	TRUE	FALSE	FALSE
cg13758543	chr13	79169714	79169715	POU4F1	5457	7979	CGI	FALSE	TRUE	FALSE
cg13941474	chr13	112788517	112788518	SOX1	6656	66603	CGI	FALSE	FALSE	TRUE
cg14413050	chr13	22615145	22615146	FGF9	2254	369929	CGI-N-Shore	TRUE	FALSE	FALSE
cg16688434	chr13	110768551	110768552	COL4A1	1282	190943	CGI	FALSE	FALSE	TRUE
cg16705627	chr13	112721950	112721951	SOX1	6656	36	CGI	TRUE	FALSE	FALSE
cg16976910	chr13	110438935	110438936	IRS2	8660	-20	CGI-S-Shore	TRUE	FALSE	FALSE
cg17435266	chr13	101241125	101241126	GGACT	87769	-78	CGI	TRUE	FALSE	FALSE
cg17541528	chr13	110959650	110959651	COL4A2	1284	18	CGI	TRUE	FALSE	FALSE
cg17601191	chr13	31264764	31264765	ALOX5AP	241	-22849	Non-CGI	FALSE	FALSE	TRUE
cg17775765	chr13	95354021	95354022	SOX21	11166	10366	CGI	FALSE	FALSE	TRUE
cg18058689	chr13	93879670	93879671	GPC6	10082	591	CGI	TRUE	FALSE	FALSE
cg18161327	chr13	100627703	100627704	ZIC5	85416	-3524	CGI	FALSE	FALSE	TRUE
cg18387839	chr13	112904312	112904313	SPACA7	122258	-126337	CGI	FALSE	FALSE	TRUE
cg19329160	chr13	79182095	79182096	POU4F1	5457	-4399	CGI	FALSE	TRUE	FALSE
cg19535358	chr13	113121733	113121734	SPACA7	122258	91081	CGI	FALSE	FALSE	TRUE
cg20194314	chr13	28503060	28503061	PDX1	3651	8891	CGI	FALSE	FALSE	TRUE
cg20806040	chr13	113497607	113497608	MCF2L	23263	-125170	CGI	FALSE	TRUE	FALSE
cg21054521	chr13	112759386	112759387	SOX1	6656	37472	CGI	FALSE	FALSE	TRUE
cg21893663	chr13	106063172	106063173	DAOA	267012	-55042	CGI	FALSE	FALSE	TRUE
cg22558303	chr13	96705786	96705787	UGGT2	55757	-49	CGI	TRUE	FALSE	FALSE
cg22757824	chr13	110960186	110960187	COL4A2	1284	554	CGI	TRUE	TRUE	FALSE
cg22809871	chr13	102572229	102572230	MIR2681	100616110	47865	CGI	FALSE	TRUE	FALSE
cg24089600	chr13	110960177	110960178	COL4A2	1284	545	CGI	TRUE	TRUE	FALSE
cg24583615	chr13	96705712	96705713	UGGT2	55757	22	CGI	TRUE	FALSE	FALSE
cg24659858	chr13	24270321	24270322	TNFRSF19	55504	125811	CGI	FALSE	FALSE	TRUE
cg24882875	chr13	96744126	96744127	HS6ST3	266722	1032	CGI	FALSE	TRUE	FALSE
cg25072733	chr13	37249481	37249482	SERTM1	400120	1431	CGI-S-Shore	FALSE	TRUE	FALSE
cg25463470	chr13	112721712	112721713	SOX1	6656	-199	CGI	TRUE	FALSE	FALSE
cg25546248	chr13	28395783	28395784	GSX1	219409	29002	CGI-S-Shore	FALSE	FALSE	TRUE
cg25772299	chr13	93879008	93879009	GPC6	10082	-68	CGI-N-Shore	TRUE	FALSE	FALSE
cg26621790	chr13	95655083	95655084	SOX21	11166	-290693	CGI	FALSE	FALSE	TRUE
cg27031448	chr13	27998168	27998169	GTF3A	2971	-511	CGI-N-Shore	TRUE	FALSE	FALSE
cg00770998	chr14	61119707	61119708	SIX1	6495	-3551	CGI	FALSE	FALSE	TRUE
cg00779065	chr14	61119218	61119219	SIX1	6495	-3062	CGI	FALSE	FALSE	TRUE
cg00872726	chr14	97499908	97499909	VRK1	7443	236223	CGI	FALSE	FALSE	TRUE
cg00970313	chr14	37125914	37125915	PAX9	5083	-857	CGI	TRUE	FALSE	FALSE
cg01168865	chr14	37641261	37641262	LOC100129794	100129794	29	CGI	TRUE	TRUE	FALSE
cg01270593	chr14	51339072	51339073	ABHD12B	145447	193	CGI	FALSE	TRUE	FALSE
cg01664864	chr14	102027677	102027678	DIO3	1735	-9	CGI	TRUE	FALSE	FALSE
cg01733204	chr14	89020645	89020646	PTPN21	11099	476	CGI-S-Shore	FALSE	TRUE	FALSE
cg01739725	chr14	38071393	38071394	FOXA1	3169	-6903	CGI	FALSE	FALSE	TRUE
cg01802258	chr14	92790097	92790098	SLC24A4	123041	1171	CGI	TRUE	TRUE	FALSE
cg01873886	chr14	54419825	54419826	BMP4	652	3727	CGI	FALSE	TRUE	FALSE
cg01935149	chr14	33403900	33403901	NPAS3	64067	-4557	CGI	FALSE	FALSE	TRUE
cg02036261	chr14	57276057	57276058	OTX2	5015	1125	CGI	FALSE	TRUE	FALSE
cg02165099	chr14	86000285	86000286	FLRT2	23768	3796	CGI	FALSE	TRUE	FALSE
cg02201215	chr14	105714846	105714847	BTBD6	90135	-31	CGI	TRUE	TRUE	FALSE
cg02224314	chr14	99641151	99641152	BCL11B	64919	96669	CGI	FALSE	TRUE	FALSE
cg04184232	chr14	29243234	29243235	C14orf23	387978	1323	CGI	FALSE	TRUE	FALSE
cg04193970	chr14	38091926	38091927	FOXA1	3169	-27436	CGI	FALSE	TRUE	FALSE
cg04224064	chr14	36992233	36992234	NKX2-1	7080	-2802	CGI	FALSE	FALSE	TRUE
cg04759648	chr14	38052740	38052741	FOXA1	3169	11747	CGI	FALSE	FALSE	TRUE
cg04937184	chr14	54423845	54423846	BMP4	652	-290	CGI-S-Shore	TRUE	FALSE	FALSE
cg05855039	chr14	85996751	85996752	FLRT2	23768	262	CGI	TRUE	FALSE	FALSE
cg06765217	chr14	38091644	38091645	FOXA1	3169	-27154	CGI	FALSE	TRUE	FALSE
cg06797880	chr14	100112250	100112251	HHIPL1	84439	769	CGI-S-Shore	FALSE	TRUE	FALSE
cg07197515	chr14	105261564	105261565	AKT1	207	514	CGI	TRUE	TRUE	FALSE
cg07509935	chr14	24780167	24780168	CIDEB	27141	407	CGI	TRUE	TRUE	FALSE
cg07929646	chr14	107221264	107221265	LINC00221	338005	282808	CGI	FALSE	TRUE	FALSE
cg08139247	chr14	38725312	38725313	CLEC14A	161198	260	CGI	TRUE	FALSE	FALSE
cg09214112	chr14	99584421	99584422	BCL11B	64919	153399	CGI	FALSE	FALSE	TRUE
cg10285466	chr14	38725710	38725711	CLEC14A	161198	-135	CGI	TRUE	FALSE	FALSE
cg10325478	chr14	88793021	88793022	KCNK10	54207	233	CGI	TRUE	FALSE	FALSE
cg10399005	chr14	70316898	70316899	SMOC1	64093	-29214	CGI	FALSE	FALSE	TRUE
cg10501704	chr14	30396444	30396445	PRKD1	5587	453	CGI	FALSE	TRUE	FALSE
cg10530851	chr14	37051417	37051418	NKX2-8	26257	367	CGI	FALSE	TRUE	FALSE
cg11086982	chr14	73736972	73736973	PAPLN	89932	32766	CGI	FALSE	TRUE	FALSE
cg11130317	chr14	103739856	103739857	EIF5	1983	-60635	CGI	FALSE	FALSE	TRUE
cg11723850	chr14	24020053	24020054	ZFHX2	85446	803	CGI	FALSE	TRUE	FALSE
cg13248574	chr14	77504561	77504562	IRF2BPL	64207	-9526	CGI	FALSE	FALSE	TRUE
cg13790268	chr14	100125548	100125549	HHIPL1	84439	14067	CGI	FALSE	TRUE	FALSE
cg14010914	chr14	64009731	64009732	PPP2R5E	5529	346	CGI	TRUE	FALSE	FALSE
cg14370314	chr14	23834891	23834892	EFS	10278	-48	CGI	TRUE	FALSE	FALSE
cg14370961	chr14	105767520	105767521	PACS2	23241	349	CGI	TRUE	TRUE	FALSE
cg14440640	chr14	61578115	61578116	PRKCH	5583	-76170	Non-CGI	FALSE	FALSE	TRUE
cg14452706	chr14	103570781	103570782	EXOC3L4	91828	4299	CGI	FALSE	TRUE	FALSE
cg14527456	chr14	74100987	74100988	DNAL1	83544	-10589	CGI	FALSE	FALSE	TRUE
cg14841828	chr14	99729088	99729089	BCL11B	64919	8732	CGI	FALSE	TRUE	FALSE
cg15827779	chr14	103524899	103524900	CDC42BPB	9578	-1156	CGI-S-Shore	TRUE	FALSE	FALSE
cg16793394	chr14	57278084	57278085	OTX2-AS1	100309464	-638	CGI	TRUE	FALSE	FALSE
cg16993582	chr14	92795230	92795231	SLC24A4	123041	6304	Non-CGI	FALSE	TRUE	FALSE
cg18070676	chr14	85997519	85997520	FLRT2	23768	1030	CGI	TRUE	TRUE	FALSE
cg18252039	chr14	38071338	38071339	FOXA1	3169	-6848	CGI	FALSE	FALSE	TRUE
cg18556834	chr14	24641070	24641071	REC8	9985	-162	CGI	TRUE	FALSE	FALSE
cg18823904	chr14	103969402	103969403	CKB	1152	19792	CGI	FALSE	TRUE	FALSE
cg19659004	chr14	103388958	103388959	AMN	81693	-33	CGI-N-Shore	TRUE	FALSE	FALSE
cg19871940	chr14	57264287	57264288	OTX2	5015	12895	CGI	FALSE	FALSE	TRUE
cg20007021	chr14	24780404	24780405	CIDEB	27141	170	CGI	TRUE	TRUE	FALSE
cg20478129	chr14	27067372	27067373	NOVA1	4857	-411	CGI	TRUE	FALSE	FALSE
cg20649047	chr14	73925161	73925162	NUMB	8650	123	CGI	FALSE	TRUE	FALSE
cg21039708	chr14	57278729	57278730	OTX2-AS1	100309464	4	CGI	TRUE	FALSE	FALSE
cg21057907	chr14	36977519	36977520	SFTA3	253970	11296	CGI	FALSE	TRUE	FALSE
cg21208270	chr14	103687728	103687729	LINC00605	100131366	-32362	CGI-S-Shore	FALSE	FALSE	TRUE
cg21542248	chr14	29243622	29243623	C14orf23	387978	1711	CGI	FALSE	TRUE	FALSE
cg21931419	chr14	74893169	74893170	SYNDIG1L	646658	-363	CGI-S-Shore	TRUE	FALSE	FALSE
cg22789982	chr14	65068635	65068636	PPP1R36	145376	52014	CGI	FALSE	FALSE	TRUE
cg22832061	chr14	34420413	34420414	EGLN3	112399	-128	CGI	TRUE	FALSE	FALSE
cg23248887	chr14	38679643	38679644	SSTR1	6751	2438	CGI	TRUE	TRUE	FALSE
cg23302649	chr14	29243690	29243691	C14orf23	387978	1779	CGI	FALSE	TRUE	FALSE
cg23571812	chr14	29234978	29234979	FOXG1	2290	-1307	CGI-N-Shore	TRUE	FALSE	FALSE
cg23703963	chr14	105953300	105953301	CRIP1	1396	42	CGI	TRUE	FALSE	FALSE
cg23920953	chr14	70038505	70038506	CCDC177	56936	-586	CGI	TRUE	FALSE	FALSE
cg23929344	chr14	36975402	36975403	SFTA3	253970	13413	CGI	FALSE	TRUE	FALSE
cg24061125	chr14	97165167	97165168	VRK1	7443	-98515	Non-CGI	FALSE	FALSE	TRUE
cg24152000	chr14	104637061	104637062	KIF26A	26153	32000	CGI	FALSE	TRUE	FALSE
cg24748769	chr14	57271015	57271016	OTX2	5015	6167	CGI-N-Shore	FALSE	TRUE	FALSE
cg25051529	chr14	37641462	37641463	LOC100129794	100129794	230	CGI	TRUE	TRUE	FALSE
cg25062778	chr14	57265268	57265269	OTX2	5015	11914	CGI	FALSE	FALSE	TRUE
cg25078444	chr14	29235193	29235194	FOXG1	2290	-1092	CGI	TRUE	FALSE	FALSE
cg25092838	chr14	57279115	57279116	OTX2-AS1	100309464	390	CGI	TRUE	TRUE	FALSE
cg26953093	chr14	105219023	105219024	SIVA1	10572	-445	CGI	TRUE	FALSE	FALSE
cg27089768	chr14	96180598	96180599	TCL1A	8115	-64	CGI	TRUE	FALSE	FALSE
cg27302539	chr14	54413548	54413549	BMP4	652	10004	CGI	FALSE	FALSE	TRUE
cg00040007	chr15	41222276	41222277	DLL4	54567	744	CGI	FALSE	TRUE	FALSE
cg00221709	chr15	96905554	96905555	MIR1469	100302258	29063	CGI-S-Shore	FALSE	FALSE	TRUE
cg00721530	chr15	89951404	89951405	LOC254559	254559	40073	CGI	FALSE	FALSE	TRUE
cg01191259	chr15	29210460	29210461	APBA2	321	79291	CGI-N-Shore	FALSE	TRUE	FALSE
cg01818121	chr15	72476917	72476918	GRAMD2	196996	13217	CGI	FALSE	TRUE	FALSE
cg01837657	chr15	90039822	90039823	RHCG	51458	-22	CGI	TRUE	FALSE	FALSE
cg01879437	chr15	78913683	78913684	CHRNA3	1136	-45	CGI-S-Shore	TRUE	FALSE	FALSE
cg01882870	chr15	89910748	89910749	MIR9-3	407051	-498	CGI	TRUE	FALSE	FALSE
cg02259324	chr15	78111196	78111197	LOC645752	645752	107990	CGI	FALSE	FALSE	TRUE
cg03256684	chr15	53045142	53045143	ONECUT1	3175	37065	Non-CGI	FALSE	FALSE	TRUE
cg03421485	chr15	41221546	41221547	DLL4	54567	14	CGI	TRUE	FALSE	FALSE
cg03442712	chr15	86292964	86292965	MIR1276	100302121	20843	Non-CGI	FALSE	FALSE	TRUE
cg03445316	chr15	40423298	40423299	BMF	90427	-22222	CGI	FALSE	FALSE	TRUE
cg04188862	chr15	88801474	88801475	NTRK3	4916	-1511	CGI	TRUE	TRUE	FALSE
cg04222582	chr15	45405103	45405104	DUOX2	50506	1254	CGI	TRUE	TRUE	FALSE
cg04875128	chr15	31775895	31775896	KLF13	51621	156811	CGI	FALSE	TRUE	FALSE
cg05044185	chr15	27112197	27112198	GABRA5	2558	330	CGI	TRUE	TRUE	FALSE
cg05239311	chr15	78913147	78913148	CHRNA3	1136	488	CGI	TRUE	FALSE	FALSE
cg05366459	chr15	64443970	64443971	SNX22	79856	53	CGI	TRUE	FALSE	FALSE
cg05922972	chr15	77362853	77362854	TSPAN3	10099	715	CGI	FALSE	TRUE	FALSE
cg06674527	chr15	65369928	65369929	KBTBD13	390594	773	CGI	TRUE	FALSE	FALSE
cg06675190	chr15	89346205	89346206	ACAN	176	-467	CGI	TRUE	FALSE	FALSE
cg06799422	chr15	41952235	41952236	MIR626	693211	-31546	CGI	TRUE	TRUE	FALSE
cg06959053	chr15	79382548	79382549	RASGRF1	5923	665	CGI	FALSE	TRUE	FALSE
cg07002382	chr15	44116782	44116783	MFAP1	4236	167	CGI	TRUE	FALSE	FALSE
cg08414676	chr15	45314943	45314944	SORD	6652	-357	CGI-N-Shore	TRUE	FALSE	FALSE
cg08445263	chr15	27216277	27216278	GABRG3	2567	-150	CGI	TRUE	FALSE	FALSE
cg09266924	chr15	29034669	29034670	LOC646278	646278	-309	CGI	TRUE	FALSE	FALSE
cg09369863	chr15	78112847	78112848	LOC645752	645752	106339	CGI	FALSE	FALSE	TRUE
cg09396068	chr15	22940794	22940795	CYFIP1	23191	48109	CGI	FALSE	TRUE	FALSE
cg09445988	chr15	89560946	89560947	ABHD2	11057	-70433	CGI	FALSE	FALSE	TRUE
cg10316525	chr15	40572137	40572138	ANKRD63	100131244	2648	CGI	FALSE	FALSE	TRUE
cg10762626	chr15	28344715	28344716	OCA2	4948	-256	CGI	TRUE	FALSE	FALSE
cg11324957	chr15	53086857	53086858	ONECUT1	3175	-4647	CGI	FALSE	FALSE	TRUE
cg11439821	chr15	48483834	48483835	CTXN2	399697	-31	CGI	TRUE	FALSE	FALSE
cg11831981	chr15	51973661	51973662	SCG3	29106	110	CGI	TRUE	FALSE	FALSE
cg12226028	chr15	76484473	76484474	TYRO3P	7302	68018	CGI	TRUE	TRUE	FALSE
cg12414681	chr15	29968195	29968196	FAM189A1	23359	-105267	CGI	FALSE	TRUE	FALSE
cg12452298	chr15	67134587	67134588	SMAD6	4091	139912	CGI	FALSE	FALSE	TRUE
cg12522610	chr15	49170643	49170644	EID1	23741	352	CGI	TRUE	TRUE	FALSE
cg12591491	chr15	68116263	68116264	SKOR1	390598	-1676	CGI	TRUE	FALSE	FALSE
cg12685846	chr15	30114814	30114815	TJP1	7082	-107	CGI	TRUE	FALSE	FALSE
cg12925764	chr15	75018266	75018267	CYP1A1	1543	-388	CGI	TRUE	FALSE	FALSE
cg13163521	chr15	41803428	41803429	LTK	4058	2655	CGI	FALSE	TRUE	FALSE
cg13423098	chr15	23807234	23807235	MIR4508	100616275	42	CGI-N-Shelf	TRUE	FALSE	FALSE
cg14096889	chr15	84322591	84322592	ADAMTSL3	57188	-245	CGI	TRUE	FALSE	FALSE
cg14509581	chr15	68522181	68522182	CALML4	91860	-23732	CGI	TRUE	TRUE	FALSE
cg14512563	chr15	96897190	96897191	MIR1469	100302258	20699	CGI	FALSE	FALSE	TRUE
cg14866032	chr15	98195808	98195809	LOC91948	91948	221849	CGI-N-Shore	FALSE	FALSE	TRUE
cg15066197	chr15	26874202	26874203	GABRA5	2558	-237662	CGI	TRUE	TRUE	FALSE
cg15070718	chr15	96876486	96876487	MIR1469	100302258	-2	CGI	TRUE	TRUE	FALSE
cg15447787	chr15	29967531	29967532	FAM189A1	23359	-104603	CGI	TRUE	FALSE	FALSE
cg15605858	chr15	29395932	29395933	NDNL2	56160	166086	CGI	FALSE	TRUE	FALSE
cg16048568	chr15	96875210	96875211	MIR1469	100302258	-1278	CGI	TRUE	TRUE	FALSE
cg16086130	chr15	101419275	101419276	ALDH1A3	220	-732	CGI	TRUE	FALSE	FALSE
cg16276982	chr15	29968032	29968033	FAM189A1	23359	-105104	CGI	FALSE	TRUE	FALSE
cg16729415	chr15	35047203	35047204	GJD2	57369	-513	CGI	TRUE	FALSE	FALSE
cg16778156	chr15	37402581	37402582	MEIS2	4212	-9080	CGI	FALSE	FALSE	TRUE
cg17286244	chr15	69222592	69222593	SPESP1	246777	-245	CGI-S-Shore	TRUE	TRUE	FALSE
cg17519696	chr15	28148266	28148267	OCA2	4948	196190	CGI	FALSE	TRUE	FALSE
cg17918544	chr15	24123363	24123364	NDN	4692	-190912	CGI	FALSE	FALSE	TRUE
cg18261205	chr15	96897151	96897152	MIR1469	100302258	20660	CGI	FALSE	FALSE	TRUE
cg18480781	chr15	60294291	60294292	FOXB1	27023	-2128	CGI	FALSE	FALSE	TRUE
cg18567924	chr15	95870450	95870451	LOC400456	400456	-120	CGI-S-Shore	TRUE	FALSE	FALSE
cg18749617	chr15	102028637	102028638	PCSK6	5046	1548	CGI	FALSE	TRUE	FALSE
cg19010490	chr15	37388127	37388128	MEIS2	4212	5371	CGI	FALSE	TRUE	FALSE
cg19377674	chr15	66590338	66590339	DIS3L	115752	4704	CGI-S-Shelf	FALSE	TRUE	FALSE
cg19461383	chr15	69325362	69325363	LINC00277	283673	-39902	CGI	FALSE	TRUE	FALSE
cg19612191	chr15	96884949	96884950	MIR1469	100302258	8458	CGI	FALSE	FALSE	TRUE
cg19687230	chr15	72490380	72490381	GRAMD2	196996	-243	CGI	TRUE	FALSE	FALSE
cg19698403	chr15	24143000	24143001	NDN	4692	-210549	Non-CGI	FALSE	FALSE	TRUE
cg20192481	chr15	51058084	51058085	SPPL2A	84888	-173	CGI	TRUE	FALSE	FALSE
cg20793089	chr15	52588057	52588058	MYO5C	55930	-61	CGI	TRUE	FALSE	FALSE
cg20985399	chr15	65689263	65689264	IGDCC3	9543	-18884	CGI	TRUE	TRUE	FALSE
cg21402921	chr15	27112305	27112306	GABRA5	2558	438	CGI	TRUE	TRUE	FALSE
cg21696781	chr15	93447854	93447855	MIR3175	100422995	224	CGI	TRUE	TRUE	FALSE
cg21801378	chr15	72612125	72612126	PARP6	56965	-48496	CGI	TRUE	TRUE	FALSE
cg22184210	chr15	57883722	57883723	MYZAP	100820829	-378	CGI-N-Shore	TRUE	FALSE	FALSE
cg22261467	chr15	24672463	24672464	PWRN1	791114	-106374	CGI	FALSE	FALSE	TRUE
cg22387369	chr15	85360691	85360692	ALPK3	57538	779	CGI	TRUE	FALSE	FALSE
cg22444584	chr15	37174661	37174662	LOC145845	145845	4071	CGI-S-Shore	FALSE	TRUE	FALSE
cg22460896	chr15	96888024	96888025	MIR1469	100302258	11533	CGI-S-Shore	FALSE	FALSE	TRUE
cg23118086	chr15	65360058	65360059	RASL12	51285	8968	CGI-N-Shore	FALSE	TRUE	FALSE
cg23934731	chr15	89904873	89904874	MIR9-3	407051	-6373	CGI	FALSE	FALSE	TRUE
cg24133547	chr15	98447577	98447578	ARRDC4	91947	-15205	CGI	FALSE	FALSE	TRUE
cg24321039	chr15	52588127	52588128	MYO5C	55930	-131	CGI	TRUE	FALSE	FALSE
cg24883642	chr15	40226588	40226589	EIF2AK4	440275	240	CGI	FALSE	TRUE	FALSE
cg25208479	chr15	89943706	89943707	LOC254559	254559	32375	CGI	FALSE	FALSE	TRUE
cg25638626	chr15	68117903	68117904	SKOR1	390598	-36	CGI	TRUE	FALSE	FALSE
cg25646046	chr15	80445330	80445331	FAH	2184	198	CGI	TRUE	TRUE	FALSE
cg25649641	chr15	76635357	76635358	ISL2	64843	6209	CGI	FALSE	FALSE	TRUE
cg25744700	chr15	79237217	79237218	CTSH	1512	201	CGI	FALSE	TRUE	FALSE
cg25840237	chr15	29967593	29967594	FAM189A1	23359	-104665	CGI	TRUE	FALSE	FALSE
cg25948154	chr15	40763247	40763248	CHST14	113189	86	CGI	TRUE	FALSE	FALSE
cg26330116	chr15	37173000	37173001	LOC145845	145845	5732	CGI	FALSE	TRUE	FALSE
cg26460092	chr15	83776420	83776421	TM6SF1	53346	95	CGI	TRUE	FALSE	FALSE
cg26891150	chr15	79575634	79575635	ANKRD34C	390616	487	CGI	FALSE	TRUE	FALSE
cg26896771	chr15	37180782	37180783	LOC145845	145845	-2047	CGI	FALSE	FALSE	TRUE
cg27073142	chr15	45314933	45314934	SORD	6652	-367	CGI-N-Shore	TRUE	FALSE	FALSE
cg00341718	chr16	1153002	1153003	C1QTNF8	390664	-6757	CGI	FALSE	FALSE	TRUE
cg00399591	chr16	18802159	18802160	RPS15A	6210	-502	CGI-S-Shore	TRUE	FALSE	FALSE
cg00469395	chr16	89315104	89315105	ZNF778	197320	30992	CGI	FALSE	FALSE	TRUE
cg00511674	chr16	78080068	78080069	CLEC3A	10143	23624	CGI	FALSE	FALSE	TRUE
cg00664609	chr16	2198075	2198076	RAB26	25837	-68	CGI-N-Shore	TRUE	FALSE	FALSE
cg00697979	chr16	84538428	84538429	KIAA1609	57707	-139	CGI	TRUE	FALSE	FALSE
cg00706697	chr16	863475	863476	PRR25	388199	8031	CGI	FALSE	TRUE	FALSE
cg00797821	chr16	49888944	49888945	ZNF423	23090	-28025	CGI	FALSE	FALSE	TRUE
cg00820311	chr16	921351	921352	PRR25	388199	65907	CGI-S-Shore	FALSE	TRUE	FALSE
cg01125333	chr16	2835331	2835332	PRSS33	260429	1375	CGI	FALSE	TRUE	FALSE
cg01290644	chr16	12662659	12662660	MIR4718	100616195	-151517	CGI-S-Shore	FALSE	TRUE	FALSE
cg01468220	chr16	779026	779027	HAGHL	84264	2067	CGI	FALSE	TRUE	FALSE
cg01560685	chr16	32322028	32322029	LOC390705	390705	-20725	CGI	TRUE	FALSE	FALSE
cg01609171	chr16	127997	127998	MPG	4350	978	CGI	TRUE	TRUE	FALSE
cg01699425	chr16	31192719	31192720	FUS	2521	1287	CGI	FALSE	TRUE	FALSE
cg01766882	chr16	85496273	85496274	GSE1	23199	-148754	CGI	FALSE	FALSE	TRUE
cg01972875	chr16	67563389	67563390	FAM65A	79567	671	CGI	TRUE	TRUE	FALSE
cg02247183	chr16	4664062	4664063	UBALD1	124402	863	CGI	TRUE	TRUE	FALSE
cg02256631	chr16	31342952	31342953	ITGAX	3687	-23555	CGI	FALSE	TRUE	FALSE
cg02390813	chr16	75563489	75563490	CHST5	23563	15902	CGI	TRUE	TRUE	FALSE
cg02548364	chr16	56703551	56703552	MT1H	4496	-173	CGI	TRUE	FALSE	FALSE
cg02851105	chr16	734504	734505	JMJD8	339123	-64	CGI	TRUE	FALSE	FALSE
cg03156396	chr16	816177	816178	MIR662	724032	-4004	CGI-S-Shore	TRUE	TRUE	FALSE
cg03176964	chr16	87090949	87090950	C16orf95	100506581	260075	CGI	FALSE	FALSE	TRUE
cg03208850	chr16	3333472	3333473	ZNF263	10127	19671	CGI	TRUE	TRUE	FALSE
cg03277550	chr16	90038083	90038084	AFG3L1P	172	-903	CGI	TRUE	FALSE	FALSE
cg03467725	chr16	1922370	1922371	MEIOB	254528	11860	CGI	TRUE	TRUE	FALSE
cg03469521	chr16	66878810	66878811	CA7	766	527	CGI	TRUE	TRUE	FALSE
cg03532331	chr16	4000474	4000475	CREBBP	1387	-70352	CGI-S-Shore	FALSE	FALSE	TRUE
cg03547722	chr16	10837705	10837706	NUBP1	4682	6	CGI	TRUE	FALSE	FALSE
cg03685886	chr16	86912525	86912526	FOXL1	2300	300409	CGI	FALSE	FALSE	TRUE
cg03845626	chr16	1032491	1032492	SOX8	30812	682	CGI	TRUE	TRUE	FALSE
cg04141813	chr16	216450	216451	HBM	3042	476	CGI	FALSE	TRUE	FALSE
cg04583842	chr16	88103117	88103118	BANP	54971	118878	CGI-S-Shore	FALSE	TRUE	FALSE
cg04640675	chr16	30572739	30572740	ZNF764	92595	-3096	CGI	FALSE	FALSE	TRUE
cg04801098	chr16	88690990	88690991	IL17C	27189	-14009	CGI	FALSE	TRUE	FALSE
cg04861014	chr16	730187	730188	STUB1	10273	71	CGI	TRUE	FALSE	FALSE
cg05031521	chr16	1030561	1030562	LMF1	64788	755	CGI	TRUE	TRUE	FALSE
cg05151621	chr16	89008406	89008407	CBFA2T3	863	35096	CGI	TRUE	TRUE	FALSE
cg05284751	chr16	34407760	34407761	UBE2MP1	606551	-2997	CGI	FALSE	FALSE	TRUE
cg05290300	chr16	80966763	80966764	CENPN	55839	-73338	CGI	FALSE	FALSE	TRUE
cg05415285	chr16	51130021	51130022	SALL1	6299	55160	CGI	FALSE	FALSE	TRUE
cg05441854	chr16	85650374	85650375	GSE1	23199	5344	CGI	FALSE	TRUE	FALSE
cg05542681	chr16	744328	744329	WDR24	84219	-3927	CGI	FALSE	TRUE	FALSE
cg05552717	chr16	66878871	66878872	CA7	766	588	CGI	TRUE	TRUE	FALSE
cg05615205	chr16	23568908	23568909	UBFD1	56061	45	CGI	TRUE	FALSE	FALSE
cg05646515	chr16	964974	964975	LMF1	64788	66342	CGI-S-Shore	FALSE	TRUE	FALSE
cg05673214	chr16	743476	743477	WDR24	84219	-3075	CGI-N-Shore	FALSE	TRUE	FALSE
cg05815255	chr16	49317169	49317170	CBLN1	869	-1426	CGI	TRUE	FALSE	FALSE
cg05948940	chr16	68481342	68481343	SMPD3	55512	1065	CGI	FALSE	TRUE	FALSE
cg06077305	chr16	2903246	2903247	PRSS22	64063	4923	CGI	FALSE	TRUE	FALSE
cg06099246	chr16	1094813	1094814	SSTR5	6755	-27941	CGI	FALSE	FALSE	TRUE
cg06320420	chr16	88872998	88872999	CDT1	81620	2811	CGI-S-Shore	FALSE	TRUE	FALSE
cg06351457	chr16	53088902	53088903	CHD9	80205	-41	CGI	TRUE	FALSE	FALSE
cg06475006	chr16	89985975	89985976	TUBB3	10381	715	CGI	TRUE	FALSE	FALSE
cg06723863	chr16	68270129	68270130	ESRP2	80004	5	CGI	TRUE	FALSE	FALSE
cg07133099	chr16	84853665	84853666	CRISPLD2	83716	77	CGI	TRUE	FALSE	FALSE
cg07245700	chr16	30041013	30041014	FAM57B	83723	1171	Non-CGI	FALSE	TRUE	FALSE
cg07249459	chr16	86600309	86600310	FOXC2	2303	-546	CGI	TRUE	FALSE	FALSE
cg07251194	chr16	67850705	67850706	TSNAXIP1	55815	9727	Non-CGI	FALSE	TRUE	FALSE
cg07681938	chr16	62070234	62070235	CDH8	1006	503	CGI	TRUE	FALSE	FALSE
cg07703401	chr16	230341	230342	HBQ1	3049	7	CGI	TRUE	FALSE	FALSE
cg07716847	chr16	67233549	67233550	ELMO3	79767	520	CGI	FALSE	TRUE	FALSE
cg07843956	chr16	692375	692376	FAM195A	84331	525	CGI	FALSE	TRUE	FALSE
cg07849944	chr16	6623738	6623739	RBFOX1	54715	554605	CGI	FALSE	TRUE	FALSE
cg07891531	chr16	3221328	3221329	OR1F1	4992	-32917	CGI	TRUE	FALSE	FALSE
cg08055663	chr16	2737356	2737357	KCTD5	54442	4860	CGI	FALSE	TRUE	FALSE
cg08076437	chr16	54315634	54315635	IRX3	79191	4742	CGI	FALSE	FALSE	TRUE
cg08324115	chr16	57450784	57450785	CCL17	6361	12104	CGI	FALSE	FALSE	TRUE
cg08424188	chr16	75285647	75285648	BCAR1	9564	16302	CGI	TRUE	TRUE	FALSE
cg08526074	chr16	51184562	51184563	SALL1	6299	619	CGI	TRUE	TRUE	FALSE
cg08555866	chr16	3345604	3345605	ZNF75A	7627	-9827	CGI	FALSE	TRUE	FALSE
cg08597761	chr16	71264545	71264546	HYDIN	54768	78	CGI	TRUE	TRUE	FALSE
cg08721338	chr16	67233983	67233984	ELMO3	79767	954	CGI	FALSE	TRUE	FALSE
cg09146900	chr16	1138415	1138416	C1QTNF8	390664	7827	CGI	FALSE	TRUE	FALSE
cg09293786	chr16	54962963	54962964	CRNDE	643911	114	CGI	TRUE	FALSE	FALSE
cg09321400	chr16	55690443	55690444	SLC6A2	6530	900	CGI	TRUE	TRUE	FALSE
cg09422450	chr16	79623618	79623619	MAF	4094	11002	CGI	FALSE	FALSE	TRUE
cg09450713	chr16	50186778	50186779	PAPD5	64282	-49	CGI	TRUE	FALSE	FALSE
cg09515097	chr16	4323120	4323121	TFAP4	7023	-118	CGI-S-Shore	TRUE	FALSE	FALSE
cg09528825	chr16	28074388	28074389	GSG1L	146395	440	CGI	FALSE	TRUE	FALSE
cg09641689	chr16	54965142	54965143	IRX5	10265	30	CGI	TRUE	FALSE	FALSE
cg09717923	chr16	1440498	1440499	UNKL	64718	24205	CGI	FALSE	TRUE	FALSE
cg09774787	chr16	55690381	55690382	SLC6A2	6530	838	CGI	TRUE	TRUE	FALSE
cg09864325	chr16	1193803	1193804	CACNA1H	8912	-9436	CGI-S-Shore	FALSE	FALSE	TRUE
cg09981013	chr16	88008551	88008552	BANP	54971	24312	CGI	FALSE	TRUE	FALSE
cg10058850	chr16	768068	768069	METRN	79006	2894	CGI-S-Shore	TRUE	FALSE	FALSE
cg10177032	chr16	4103492	4103493	ADCY9	115	62692	CGI-S-Shore	FALSE	TRUE	FALSE
cg10287301	chr16	23568541	23568542	EARS2	124454	153	CGI	TRUE	FALSE	FALSE
cg12064134	chr16	90016061	90016062	DEF8	54849	921	CGI	FALSE	TRUE	FALSE
cg12258919	chr16	2521473	2521474	NTN3	4917	-25	CGI	TRUE	FALSE	FALSE
cg16158681	chr16	56623109	56623110	MT3	4504	-156	CGI	TRUE	FALSE	FALSE
cg16356516	chr16	70286390	70286391	EXOSC6	118460	-556	CGI-S-Shore	TRUE	TRUE	FALSE
cg17198711	chr16	1143887	1143888	C1QTNF8	390664	2355	CGI	FALSE	TRUE	FALSE
cg26832183	chr16	56221534	56221535	LOC283856	283856	3470	CGI-N-Shelf	FALSE	TRUE	FALSE
cg27145034	chr16	19179928	19179929	SYT17	51760	289	CGI	TRUE	FALSE	FALSE
cg27232078	chr16	75569459	75569460	CHST5	23563	9932	CGI	TRUE	TRUE	FALSE
cg27436995	chr16	743998	743999	WDR24	84219	-3597	CGI	FALSE	TRUE	FALSE
cg00126959	chr17	48712203	48712204	ABCC3	8714	-13	CGI	TRUE	FALSE	FALSE
cg00267596	chr17	46724138	46724139	MIR196A1	406972	-14216	CGI	FALSE	FALSE	TRUE
cg00328418	chr17	260286	260287	C17orf97	400566	167	CGI	TRUE	FALSE	FALSE
cg00548708	chr17	48041547	48041548	DLX4	1748	-5013	CGI	FALSE	FALSE	TRUE
cg00620733	chr17	41723536	41723537	MEOX1	4222	15724	CGI	FALSE	TRUE	FALSE
cg01396112	chr17	26120702	26120703	LYRM9	201229	99705	CGI	FALSE	TRUE	FALSE
cg01801040	chr17	15899410	15899411	TTC19	54902	-3282	CGI-N-Shelf	FALSE	TRUE	FALSE
cg02090762	chr17	79503859	79503860	FSCN2	25794	8441	CGI	FALSE	TRUE	FALSE
cg02622647	chr17	43578911	43578912	PLEKHM1	9842	-10764	CGI	TRUE	TRUE	FALSE
cg02997574	chr17	46125811	46125812	NFE2L1	4779	124	CGI	TRUE	FALSE	FALSE
cg03292213	chr17	17109640	17109641	FLCN	201163	30860	CGI	TRUE	TRUE	FALSE
cg03297901	chr17	76117767	76117768	TMC8	147138	-9090	CGI	FALSE	TRUE	FALSE
cg03641793	chr17	19281596	19281597	B9D1	27077	-100	CGI	TRUE	TRUE	FALSE
cg03804148	chr17	1465813	1465814	PITPNA	5306	295	CGI	FALSE	TRUE	FALSE
cg03882612	chr17	74075100	74075101	ZACN	353174	-161	CGI-S-Shore	TRUE	FALSE	FALSE
cg04030486	chr17	6358599	6358600	FAM64A	54478	10863	CGI	FALSE	TRUE	FALSE
cg04296540	chr17	33787583	33787584	SLFN13	146857	-11726	CGI	FALSE	FALSE	TRUE
cg04438818	chr17	7737225	7737226	KDM6B	23135	-6008	CGI	FALSE	FALSE	TRUE
cg04532952	chr17	58227745	58227746	CA4	762	442	CGI-S-Shore	FALSE	TRUE	FALSE
cg04802236	chr17	37010032	37010033	RPL23	9349	19	CGI	TRUE	FALSE	FALSE
cg04819499	chr17	43045014	43045015	C1QL1	10882	628	CGI	TRUE	FALSE	FALSE
cg04974290	chr17	5001047	5001048	USP6	9098	-18684	CGI	FALSE	FALSE	TRUE
cg05210412	chr17	58227342	58227343	CA4	762	39	CGI	TRUE	FALSE	FALSE
cg05250241	chr17	43321328	43321329	MAP3K14-AS1	100133991	-3973	CGI-S-Shore	FALSE	TRUE	FALSE
cg05447483	chr17	74381280	74381281	SPHK1	8877	8537	CGI	TRUE	TRUE	FALSE
cg05590257	chr17	17109570	17109571	FLCN	201163	30930	CGI	TRUE	TRUE	FALSE
cg05651778	chr17	60729731	60729732	MRC2	9902	24968	CGI	FALSE	TRUE	FALSE
cg05726661	chr17	7348438	7348439	CHRNB1	1140	31	CGI	TRUE	TRUE	FALSE
cg05768702	chr17	47271133	47271134	ABI3	51225	-16454	CGI-S-Shore	FALSE	FALSE	TRUE
cg05916671	chr17	15848216	15848217	ADORA2B	136	-13	CGI	TRUE	FALSE	FALSE
cg06456071	chr17	7198067	7198068	YBX2	51087	-190	CGI	TRUE	FALSE	FALSE
cg06896906	chr17	76837240	76837241	USP36	57602	-270	CGI	TRUE	FALSE	FALSE
cg06962857	chr17	71228465	71228466	FAM104A	84923	66	CGI	TRUE	FALSE	FALSE
cg06970884	chr17	2300100	2300101	MNT	4335	4156	CGI-N-Shore	FALSE	TRUE	FALSE
cg07274618	chr17	74070698	74070699	GALR2	8811	-192	CGI	TRUE	FALSE	FALSE
cg07584066	chr17	57642749	57642750	DHX40	79665	-135	CGI-N-Shore	TRUE	FALSE	FALSE
cg07697321	chr17	72921103	72921104	OTOP2	92736	732	CGI-S-Shore	TRUE	TRUE	FALSE
cg08009275	chr17	79790191	79790192	FAM195B	348262	974	CGI-N-Shore	FALSE	TRUE	FALSE
cg08457011	chr17	2659081	2659082	MIR1253	100302208	-7604	CGI	FALSE	FALSE	TRUE
cg08787268	chr17	47072857	47072858	IGF2BP1	10642	-1915	CGI	TRUE	FALSE	FALSE
cg09039782	chr17	43662154	43662155	LOC644172	644172	17592	CGI	FALSE	FALSE	TRUE
cg09096555	chr17	72848358	72848359	GRIN2C	2905	8606	CGI	FALSE	TRUE	FALSE
cg09489844	chr17	79880647	79880648	SIRT7	51547	-4588	CGI	FALSE	TRUE	FALSE
cg09655666	chr17	34820190	34820191	TBC1D3G	654341	-12086	CGI	FALSE	FALSE	TRUE
cg09677243	chr17	31619231	31619232	AA06	100506677	241546	CGI	TRUE	TRUE	FALSE
[truncated: 3,922 more rows]
