# Supplementary material for: H3K4me1 marks DNA regions hypomethylated during aging in human stem and differentiated cells
Source: HighWire-hosted journal article supplement (doi:10.1101/gr.169011.113), 2014-09-30
Supplement: Supplemental_Table_24.xlsx [file Supplemental_Table_24.xlsx]

## Sheet: ST24
Supplemental Table 24: List of divergent CpG sites where the Euclidean distance (ED) between MZ twins increased (> 2-fold) with age
Target ID	Chromosome	start	end	nearest.gene	nearest.gene.id	disttotss	hmm.cpgi	prom.reg	intra.reg	inter.reg
cg00787537	chr1	211307839	211307840	KCNH1	3756	-381	CGI-S-Shore	TRUE	FALSE	FALSE
cg00941229	chr1	149982400	149982401	OTUD7B	56957	284	CGI	TRUE	FALSE	FALSE
cg01395650	chr1	197170599	197170600	CRB1	23418	6	CGI	TRUE	FALSE	FALSE
cg02395396	chr1	52435307	52435308	RAB3B	5865	21127	Non-CGI	FALSE	TRUE	FALSE
cg03769927	chr1	27480849	27480850	SLC9A1	6548	600	CGI-S-Shore	TRUE	FALSE	FALSE
cg04835163	chr1	74663899	74663900	FPGT-TNNI3K	100526835	2	CGI	TRUE	FALSE	FALSE
cg05802452	chr1	228194476	228194477	WNT3A	89780	-245	CGI	TRUE	FALSE	FALSE
cg06650246	chr1	206897270	206897271	MAPKAPK2	9261	38904	Non-CGI	FALSE	TRUE	FALSE
cg07793638	chr1	6675684	6675685	PHF13	148479	1927	CGI	FALSE	TRUE	FALSE
cg08876274	chr1	3028230	3028231	MIR4251	100422968	-16307	CGI	FALSE	TRUE	FALSE
cg10626236	chr1	1631100	1631101	MMP23A	8511	-276	CGI	TRUE	TRUE	FALSE
cg11176493	chr1	228248237	228248238	ARF1	375	-22122	CGI-S-Shore	FALSE	TRUE	FALSE
cg11237215	chr1	244806055	244806056	DESI2	51029	-10295	CGI-N-Shore	FALSE	FALSE	TRUE
cg11951427	chr1	35351903	35351904	DLGAP3	58512	19079	CGI-S-Shore	FALSE	TRUE	FALSE
cg12141218	chr1	209799248	209799249	MIR4260	100422894	-2392	Non-CGI	FALSE	TRUE	FALSE
cg12666727	chr1	42128487	42128488	EDN2	1907	-178142	CGI	FALSE	TRUE	FALSE
cg13898430	chr1	25292274	25292275	RUNX3	864	-661	CGI-S-Shore	TRUE	FALSE	FALSE
cg16169620	chr1	155827015	155827016	GON4L	54856	2174	CGI	TRUE	TRUE	FALSE
cg17178218	chr1	7352249	7352250	VAMP3	9341	-479078	Non-CGI	FALSE	TRUE	FALSE
cg17184491	chr1	41483645	41483646	SLFNL1-AS1	100507178	3382	CGI-S-Shore	TRUE	TRUE	FALSE
cg17420036	chr1	22182143	22182144	LDLRAD2	401944	43384	Non-CGI	FALSE	TRUE	FALSE
cg18128887	chr1	24861708	24861709	NCMAP	400746	-20857	CGI-N-Shore	FALSE	TRUE	FALSE
cg20511194	chr1	45987619	45987620	PRDX1	5052	941	CGI	TRUE	TRUE	FALSE
cg21147983	chr1	11897631	11897632	NPPA-AS1	100379251	-2743	CGI	FALSE	TRUE	FALSE
cg21826784	chr1	11795937	11795938	AGTRAP	57085	-203	CGI-N-Shore	TRUE	FALSE	FALSE
cg22372182	chr1	223566669	223566670	C1orf65	164127	-44	CGI-N-Shore	TRUE	FALSE	FALSE
cg23022344	chr1	24969466	24969467	SRRM1	10250	-126	CGI	TRUE	FALSE	FALSE
cg24550298	chr1	8386089	8386090	SLC45A1	50651	1698	CGI	FALSE	TRUE	FALSE
cg24943329	chr1	27319836	27319837	TRNP1	388610	-357	CGI	TRUE	TRUE	FALSE
cg25001930	chr1	147801789	147801790	PPIAL4B	653505	153628	CGI	FALSE	TRUE	FALSE
cg25408271	chr1	91486822	91486823	ZNF644	84146	988	CGI-N-Shore	FALSE	TRUE	FALSE
cg00872414	chr2	23913322	23913323	ATAD2B	54454	236612	CGI-N-Shore	TRUE	TRUE	FALSE
cg01077058	chr2	241083864	241083865	OTOS	150677	-3790	Non-CGI	FALSE	FALSE	TRUE
cg05361673	chr2	235962928	235962929	SH3BP4	23677	102299	CGI-S-Shore	FALSE	TRUE	FALSE
cg05903289	chr2	130345205	130345206	LOC389033	389033	346683	CGI	FALSE	FALSE	TRUE
cg07561442	chr2	24163383	24163384	UBXN2A	165324	13227	CGI	TRUE	TRUE	FALSE
cg07582400	chr2	239010679	239010680	ESPNL	339768	1727	CGI-S-Shore	FALSE	TRUE	FALSE
cg07791671	chr2	242255336	242255337	HDLBP	3069	-220	CGI	TRUE	TRUE	FALSE
cg08235500	chr2	26467844	26467845	HADHB	3032	227	CGI	TRUE	FALSE	FALSE
cg08690859	chr2	200333729	200333730	SATB2-AS1	150538	907	CGI	TRUE	TRUE	FALSE
cg09333532	chr2	61764274	61764275	XPO1	7514	1142	CGI	TRUE	TRUE	FALSE
cg09840623	chr2	42396402	42396403	EML4	27436	-86	CGI	TRUE	FALSE	FALSE
cg10042319	chr2	232394971	232394972	NMUR1	10316	209	CGI	FALSE	TRUE	FALSE
cg11788289	chr2	214148976	214148977	LOC100130451	100130451	-46	CGI-N-Shore	TRUE	FALSE	FALSE
cg11826338	chr2	98274951	98274952	ACTR1B	10120	5608	CGI	FALSE	TRUE	FALSE
cg13362112	chr2	97174246	97174247	NEURL3	93082	-399	CGI	TRUE	FALSE	FALSE
cg14274989	chr2	119606302	119606303	EN1	2019	-542	CGI	TRUE	FALSE	FALSE
cg16200531	chr2	135532566	135532567	TMEM163	81615	-7231	Non-CGI	FALSE	FALSE	TRUE
cg17245188	chr2	149632709	149632710	KIF5C	3800	-81	CGI	TRUE	FALSE	FALSE
cg18206867	chr2	62422351	62422352	B3GNT2	10678	-909	CGI	TRUE	FALSE	FALSE
cg18339598	chr2	238065252	238065253	COPS8	10920	71167	CGI	FALSE	FALSE	TRUE
cg19908362	chr2	240029909	240029910	MIR4441	100616493	-22286	CGI	FALSE	TRUE	FALSE
cg20019365	chr2	219134978	219134979	AAMP	14	-84	CGI	TRUE	FALSE	FALSE
cg20072442	chr2	80530255	80530256	LRRTM1	347730	1230	CGI	TRUE	TRUE	FALSE
cg22107710	chr2	55289198	55289199	RTN4	57142	-11463	CGI	FALSE	FALSE	TRUE
cg23136742	chr2	26950956	26950957	KCNK3	3777	35374	CGI	FALSE	TRUE	FALSE
cg23241628	chr2	55278043	55278044	RTN4	57142	-308	CGI	TRUE	FALSE	FALSE
cg24478803	chr2	26786046	26786047	C2orf70	339778	564	CGI	FALSE	TRUE	FALSE
cg24551396	chr2	242895660	242895661	CXXC11	285093	83773	CGI	FALSE	FALSE	TRUE
cg25240445	chr2	37458543	37458544	CEBPZ	10153	195	CGI	TRUE	TRUE	FALSE
cg25471520	chr2	166813804	166813805	TTC21B	79809	-3455	CGI	FALSE	FALSE	TRUE
cg25534953	chr2	97174206	97174207	NEURL3	93082	-359	CGI	TRUE	FALSE	FALSE
cg26378982	chr2	11053937	11053938	KCNF1	3754	1873	CGI	TRUE	FALSE	FALSE
cg00744083	chr3	38648200	38648201	SCN5A	6331	42962	Non-CGI	TRUE	TRUE	FALSE
cg00987743	chr3	49581113	49581114	BSN-AS2	100132677	10684	CGI-S-Shelf	FALSE	FALSE	TRUE
cg02504211	chr3	194815434	194815435	XXYLT1	152002	176459	CGI	FALSE	TRUE	FALSE
cg02806645	chr3	138725153	138725154	PRR23A	729627	-42	CGI	TRUE	FALSE	FALSE
cg04412755	chr3	46939978	46939979	PTH1R	5745	20741	CGI	FALSE	TRUE	FALSE
cg04614380	chr3	50192449	50192450	SEMA3F	6405	-397	CGI	TRUE	TRUE	FALSE
cg05983061	chr3	39544192	39544193	MOBP	4336	35121	CGI	FALSE	TRUE	FALSE
cg06508320	chr3	179660149	179660150	PEX5L	51555	94366	CGI-N-Shore	FALSE	TRUE	FALSE
cg10604373	chr3	194004692	194004693	LOC100131551	100131551	25899	Non-CGI	FALSE	FALSE	TRUE
cg11929643	chr3	48700391	48700392	CELSR3	1951	9588	CGI	TRUE	TRUE	FALSE
cg13056927	chr3	42727915	42727916	KLHL40	131377	903	CGI	TRUE	FALSE	FALSE
cg13327336	chr3	50403312	50403313	TMEM115	11070	-6372	CGI-S-Shore	FALSE	TRUE	FALSE
cg22498996	chr3	148415624	148415625	AGTR1	185	-32	CGI	TRUE	FALSE	FALSE
cg22984571	chr3	186490656	186490657	EIF4A2	1974	-10703	CGI	FALSE	FALSE	TRUE
cg23514324	chr3	12329213	12329214	PPARG	5468	-134	CGI	TRUE	FALSE	FALSE
cg25198428	chr3	72496181	72496182	RYBP	23429	-406	CGI	TRUE	FALSE	FALSE
cg25506747	chr3	157813810	157813811	SHOX2	6474	10140	CGI-S-Shore	FALSE	TRUE	FALSE
cg26162331	chr3	39322541	39322542	CX3CR1	1524	683	Non-CGI	TRUE	TRUE	FALSE
cg02930317	chr4	146100881	146100882	OTUD4	54726	-48	CGI	TRUE	FALSE	FALSE
cg12455762	chr4	40859095	40859096	NSUN7	79730	107180	CGI	TRUE	TRUE	FALSE
cg13506653	chr4	54965863	54965864	GSX2	170825	-383	CGI	TRUE	TRUE	FALSE
cg14561596	chr4	133045178	133045179	PCDH10	57575	-1025290	CGI	FALSE	FALSE	TRUE
cg16147221	chr4	10020634	10020635	SLC2A9	56606	21236	CGI	FALSE	TRUE	FALSE
cg16220124	chr4	13549839	13549840	LOC285548	285548	-390	CGI	TRUE	FALSE	FALSE
cg18168751	chr4	974821	974822	IDUA	3425	-5962	CGI	FALSE	TRUE	FALSE
cg20107996	chr4	12886669	12886670	HSP90AB2P	391634	-448366	Non-CGI	FALSE	FALSE	TRUE
cg20478578	chr4	79103030	79103031	FRAS1	80144	124305	CGI	FALSE	TRUE	FALSE
cg24013618	chr4	870925	870926	CPLX1	10815	-50979	CGI	FALSE	TRUE	FALSE
cg24023097	chr4	152330337	152330338	FAM160A1	729830	-59	CGI	TRUE	FALSE	FALSE
cg24454219	chr4	492856	492857	PIGG	54872	-131	CGI-N-Shore	TRUE	FALSE	FALSE
cg26105156	chr4	81951953	81951954	BMP3	651	-164	CGI	TRUE	FALSE	FALSE
cg26675664	chr4	1408936	1408937	CRIPAK	285464	23595	CGI	FALSE	FALSE	TRUE
cg27574071	chr4	1219498	1219499	LOC100130872	100130872	-16747	CGI	FALSE	TRUE	FALSE
cg00042478	chr5	14710790	14710791	FAM105B	90268	46006	CGI	FALSE	TRUE	FALSE
cg00558737	chr5	153418398	153418399	FAM114A2	10827	97	CGI	TRUE	TRUE	FALSE
cg02304092	chr5	126409227	126409228	C5orf63	401207	-42	CGI	TRUE	FALSE	FALSE
cg04248271	chr5	158524404	158524405	EBF1	1879	2382	CGI	TRUE	TRUE	FALSE
cg05016408	chr5	150326174	150326175	ZNF300P1	134466	-27	CGI	TRUE	FALSE	FALSE
cg05706117	chr5	38258451	38258452	EGFLAM	133584	-58	CGI	TRUE	FALSE	FALSE
cg07389500	chr5	137681244	137681245	KDM3B	51780	-7039	CGI	FALSE	TRUE	FALSE
cg07459121	chr5	1092793	1092794	SLC12A7	10723	19377	CGI-S-Shore	FALSE	TRUE	FALSE
cg10552847	chr5	74632966	74632967	HMGCR	3156	811	CGI	TRUE	TRUE	FALSE
cg10812634	chr5	126409211	126409212	C5orf63	401207	-26	CGI	TRUE	FALSE	FALSE
cg14135025	chr5	55776721	55776722	ANKRD55	79722	-247534	CGI	FALSE	FALSE	TRUE
cg16358034	chr5	53815303	53815304	SNX18	112574	1713	CGI	TRUE	FALSE	FALSE
cg16527418	chr5	98175367	98175368	FLJ35946	503569	-66578	CGI	FALSE	FALSE	TRUE
cg18710053	chr5	126409061	126409062	C5orf63	401207	121	CGI-N-Shore	FALSE	TRUE	FALSE
cg21799206	chr5	10563665	10563666	ANKRD33B	651746	-768	CGI	TRUE	FALSE	FALSE
cg22905511	chr5	126409198	126409199	C5orf63	401207	-13	CGI	TRUE	FALSE	FALSE
cg23256297	chr5	123987523	123987524	ZNF608	57507	96975	CGI	FALSE	TRUE	FALSE
cg24667575	chr5	172097064	172097065	NEURL1B	54492	28787	CGI	FALSE	TRUE	FALSE
cg27097438	chr5	126409153	126409154	C5orf63	401207	29	CGI	TRUE	FALSE	FALSE
cg00084338	chr6	170595920	170595921	DLL1	28514	3775	CGI	FALSE	TRUE	FALSE
cg00186529	chr6	170452864	170452865	LOC154449	154449	118791	CGI	FALSE	FALSE	TRUE
cg02964065	chr6	32729545	32729546	HLA-DQB2	3120	1783	CGI	FALSE	TRUE	FALSE
cg07485685	chr6	35696061	35696062	FKBP5	2289	334	CGI	FALSE	TRUE	FALSE
cg08727218	chr6	87832318	87832319	CGA	1081	-27452	CGI	FALSE	FALSE	TRUE
cg11192541	chr6	30434109	30434110	HLA-E	3133	-23072	CGI	FALSE	FALSE	TRUE
cg14441480	chr6	32729500	32729501	HLA-DQB2	3120	1828	CGI	FALSE	TRUE	FALSE
cg15977685	chr6	168743593	168743594	DACT2	168002	-23190	CGI-N-Shelf	FALSE	FALSE	TRUE
cg17754510	chr6	10391412	10391413	LOC100130275	100130275	-21137	CGI	FALSE	FALSE	TRUE
cg18729896	chr6	31126345	31126346	TCF19	6941	41	CGI	TRUE	FALSE	FALSE
cg20148850	chr6	10422227	10422228	TFAP2A	7020	-2429	CGI	FALSE	FALSE	TRUE
cg22401907	chr6	16353242	16353243	GMPR	2766	114430	CGI-N-Shore	FALSE	TRUE	FALSE
cg22827707	chr6	34100899	34100900	GRM4	2914	12968	Non-CGI	TRUE	TRUE	FALSE
cg25147604	chr6	7540971	7540972	DSP	1832	-897	CGI	TRUE	FALSE	FALSE
cg00418216	chr7	27227847	27227848	HOXA11-AS	221883	2819	CGI	TRUE	TRUE	FALSE
cg01078824	chr7	27220047	27220048	HOXA10-HOXA9	100534589	-166	CGI-S-Shore	TRUE	FALSE	FALSE
cg02126753	chr7	44143998	44143999	AEBP1	165	37	CGI	TRUE	FALSE	FALSE
cg02888048	chr7	98335163	98335164	NPTX2	4885	88565	Non-CGI	FALSE	FALSE	TRUE
cg06332777	chr7	4118685	4118686	FOXK1	221937	-564701	CGI	FALSE	TRUE	FALSE
cg07241675	chr7	99067143	99067144	ATP5J2-PTCD1	100526740	-3318	CGI	TRUE	FALSE	FALSE
cg09982773	chr7	128550860	128550861	KCP	375616	-86	CGI	TRUE	FALSE	FALSE
cg10501602	chr7	150705872	150705873	ATG9B	285973	15712	CGI	FALSE	TRUE	FALSE
cg10614809	chr7	51539190	51539191	COBL	23242	-154674	CGI	FALSE	FALSE	TRUE
cg11757417	chr7	98424289	98424290	TMEM130	222865	43382	CGI	FALSE	FALSE	TRUE
cg12009398	chr7	158854856	158854857	LINC00689	154822	53810	CGI	FALSE	TRUE	FALSE
cg12620706	chr7	155917159	155917160	SHH	6469	-312191	CGI	FALSE	FALSE	TRUE
cg13337731	chr7	73011308	73011309	TBL2	26608	-18294	Non-CGI	FALSE	TRUE	FALSE
cg16658412	chr7	1883420	1883421	MIR4655	100616160	467	CGI	TRUE	TRUE	FALSE
cg17907628	chr7	2473529	2473530	CHST12	55501	30333	CGI	FALSE	TRUE	FALSE
cg17949813	chr7	1801521	1801522	ELFN1	392617	52722	CGI-N-Shore	FALSE	FALSE	TRUE
cg18811550	chr7	27198311	27198312	HOXA7	3204	-2014	CGI	FALSE	FALSE	TRUE
cg19915007	chr7	41189312	41189313	INHBA-AS1	285954	-544200	CGI	FALSE	FALSE	TRUE
cg20706192	chr7	26241055	26241056	CBX3	11335	223	CGI	TRUE	FALSE	FALSE
cg22962123	chr7	27153605	27153606	HOXA2	3199	-11210	CGI	FALSE	TRUE	FALSE
cg03074188	chr8	37557348	37557349	ZNF703	80139	4046	CGI	FALSE	FALSE	TRUE
cg03454775	chr8	2012595	2012596	MYOM2	9172	19436	CGI	FALSE	TRUE	FALSE
cg04753829	chr8	145879308	145879309	ARHGAP39	80728	31884	Non-CGI	FALSE	TRUE	FALSE
cg05494008	chr8	145579285	145579286	TMEM249	340393	-15	CGI-S-Shore	TRUE	TRUE	FALSE
cg07041999	chr8	2178272	2178273	MYOM2	9172	185113	CGI-S-Shore	FALSE	FALSE	TRUE
cg07597069	chr8	144994356	144994357	MIR661	724031	25089	CGI	FALSE	TRUE	FALSE
cg10951117	chr8	50653939	50653940	SNTG1	54212	-168408	Non-CGI	FALSE	FALSE	TRUE
cg11904266	chr8	144652042	144652043	MROH6	642475	2884	CGI	FALSE	TRUE	FALSE
cg13531748	chr8	23261967	23261968	LOXL2	4017	-244	CGI	TRUE	TRUE	FALSE
cg13609385	chr8	41580932	41580933	NKX6-3	157848	62451	CGI-N-Shore	FALSE	TRUE	FALSE
cg16482314	chr8	77596069	77596070	ZFHX4-AS1	100192378	-558	CGI-S-Shore	TRUE	TRUE	FALSE
cg21787521	chr8	145854395	145854396	ARHGAP39	80728	56797	CGI	FALSE	TRUE	FALSE
cg27506254	chr8	56436472	56436473	SBF1P1	100133234	-68590	CGI	FALSE	TRUE	FALSE
cg13784312	chr9	134609065	134609066	RAPGEF1	2889	6150	Non-CGI	FALSE	TRUE	FALSE
cg14321365	chr9	134001527	134001528	NUP214	8021	545	CGI-S-Shore	FALSE	TRUE	FALSE
cg14328683	chr9	139909161	139909162	C9orf139	401563	-12753	CGI	FALSE	TRUE	FALSE
cg14404746	chr9	140116137	140116138	RNF208	727800	-361	CGI	TRUE	FALSE	FALSE
cg14507433	chr9	96275894	96275895	FAM120AOS	158293	-60019	CGI-N-Shelf	FALSE	TRUE	FALSE
cg21176398	chr9	140771599	140771600	CACNA1B	774	-640	CGI	TRUE	TRUE	FALSE
cg00627798	chr10	99696032	99696033	GOLGA7B	401647	86036	Non-CGI	TRUE	TRUE	FALSE
cg01460124	chr10	133954088	133954089	JAKMIP3	282973	35774	CGI	FALSE	TRUE	FALSE
cg01805540	chr10	18429749	18429750	CACNB2	783	142	CGI	TRUE	FALSE	FALSE
cg06261400	chr10	131744476	131744477	EBF3	253738	17613	CGI-N-Shelf	FALSE	TRUE	FALSE
cg06737561	chr10	50821518	50821519	SLC18A3	6572	3170	CGI	TRUE	TRUE	FALSE
cg07450214	chr10	27389879	27389880	ANKRD26	22852	-451	CGI-S-Shore	TRUE	FALSE	FALSE
cg07787666	chr10	135059289	135059290	MIR202	574448	1833	CGI-N-Shore	FALSE	FALSE	TRUE
cg10187894	chr10	38015525	38015526	MTRNR2L7	100288485	-123665	CGI	FALSE	FALSE	TRUE
cg11961495	chr10	80873797	80873798	ZMIZ1	57178	45004	Non-CGI	FALSE	TRUE	FALSE
cg12014181	chr10	729479	729480	DIP2C	22982	6127	CGI	FALSE	TRUE	FALSE
cg12033288	chr10	102381293	102381294	HIF1AN	55662	85651	Non-CGI	FALSE	FALSE	TRUE
cg12052250	chr10	103530237	103530238	FGF8	2253	9887	CGI	FALSE	TRUE	FALSE
cg12626698	chr10	135381851	135381852	SYCE1	93426	1023	CGI	FALSE	TRUE	FALSE
cg16352527	chr10	72476178	72476179	ADAMTS14	140766	43618	Non-CGI	FALSE	TRUE	FALSE
cg16936421	chr10	729226	729227	DIP2C	22982	6380	CGI-N-Shore	FALSE	TRUE	FALSE
cg18426487	chr10	35379348	35379349	CUL2	8453	220	CGI	TRUE	TRUE	FALSE
cg19906973	chr10	73562723	73562724	C10orf54	64115	-29385	CGI-N-Shelf	FALSE	TRUE	FALSE
cg19974131	chr10	86526976	86526977	CCSER2	54462	438565	CGI	FALSE	FALSE	TRUE
cg22867608	chr10	64573356	64573357	EGR2	1959	5569	CGI	FALSE	TRUE	FALSE
cg25651562	chr10	100994143	100994144	HPSE2	60495	1487	CGI	FALSE	TRUE	FALSE
cg26879815	chr10	32048936	32048937	ARHGAP12	94134	168832	CGI	FALSE	FALSE	TRUE
cg27332938	chr10	135122768	135122769	PRAP1	118471	-124	CGI	TRUE	TRUE	FALSE
cg00375146	chr11	1221812	1221813	MUC5B	727897	70231	CGI	FALSE	TRUE	FALSE
cg02341556	chr11	118781978	118781979	BCL9L	283149	-364	CGI-S-Shore	TRUE	FALSE	FALSE
cg02734782	chr11	118272031	118272032	ATP5L	10632	-71	CGI	TRUE	FALSE	FALSE
cg02760300	chr11	78780772	78780773	MIR708	100126333	332379	CGI	TRUE	TRUE	FALSE
cg02800396	chr11	64532971	64532972	PYGM	5837	-4783	CGI	TRUE	TRUE	FALSE
cg04451748	chr11	35684488	35684489	TRIM44	54765	134	CGI	TRUE	FALSE	FALSE
cg04677061	chr11	32112634	32112635	PAX6	5080	-273124	CGI	TRUE	TRUE	FALSE
cg05701676	chr11	73018662	73018663	ARHGEF17	9828	-999	CGI	TRUE	FALSE	FALSE
cg07180307	chr11	109294168	109294169	C11orf87	399947	1321	CGI	TRUE	TRUE	FALSE
cg07691484	chr11	842764	842765	TSPAN4	7106	-58	CGI	TRUE	FALSE	FALSE
cg08106165	chr11	120383654	120383655	GRIK4	2900	1185	CGI-S-Shore	FALSE	TRUE	FALSE
cg09376352	chr11	119076657	119076658	CBL	867	-331	CGI	TRUE	FALSE	FALSE
cg09519504	chr11	117314759	117314760	CEP164	22897	122326	Non-CGI	FALSE	TRUE	FALSE
cg09563228	chr11	68442135	68442136	GAL	51083	-9846	CGI	FALSE	FALSE	TRUE
cg10333023	chr11	128774411	128774412	C11orf45	219833	1687	CGI-N-Shore	FALSE	TRUE	FALSE
cg10721856	chr11	2009179	2009180	MRPL23-AS1	100133545	1969	CGI-S-Shelf	FALSE	TRUE	FALSE
cg11666921	chr11	2722062	2722063	KCNQ1OT1	10984	-833	CGI	TRUE	TRUE	FALSE
cg12086936	chr11	31832879	31832880	DKFZp686K1684	440034	-5233	CGI	TRUE	TRUE	FALSE
cg16082695	chr11	133900846	133900847	LOC100128239	100128239	-1319	Non-CGI	TRUE	FALSE	FALSE
cg16906347	chr11	75063246	75063247	ARRB1	408	-370	CGI	TRUE	FALSE	FALSE
cg17015511	chr11	110167602	110167603	RDX	5962	-164	CGI	TRUE	FALSE	FALSE
cg19428160	chr11	17761718	17761719	KCNC1	3746	4222	CGI-S-Shelf	FALSE	TRUE	FALSE
cg20070536	chr11	9335581	9335582	TMEM41B	440026	732	CGI	FALSE	TRUE	FALSE
cg01169073	chr12	112280321	112280322	MAPKAPK5	8550	41	CGI	TRUE	FALSE	FALSE
cg02403541	chr12	121454288	121454289	C12orf43	64897	10	CGI	TRUE	FALSE	FALSE
cg03048372	chr12	124929991	124929992	NCOR2	9612	122017	CGI	FALSE	TRUE	FALSE
cg06211872	chr12	115123251	115123252	TBX3	6926	-1281	CGI	TRUE	FALSE	FALSE
cg08545826	chr12	57963953	57963954	KIF5A	3798	20105	Non-CGI	FALSE	TRUE	FALSE
cg10104252	chr12	3563899	3563900	PRMT8	56341	73383	CGI-S-Shore	FALSE	TRUE	FALSE
cg11416012	chr12	4380899	4380900	CCND2	894	-2001	CGI	FALSE	FALSE	TRUE
cg12392916	chr12	6772545	6772546	ING4	51147	-236	CGI	TRUE	FALSE	FALSE
cg12812760	chr12	53645951	53645952	MFSD5	84975	580	CGI	TRUE	TRUE	FALSE
cg13929079	chr12	49246153	49246154	DDX23	9416	-195	CGI	TRUE	FALSE	FALSE
cg14976741	chr12	4872921	4872922	GALNT8	26290	43168	CGI	FALSE	TRUE	FALSE
cg17213699	chr12	6881624	6881625	LAG3	3902	-44	CGI-N-Shore	TRUE	FALSE	FALSE
cg26550872	chr12	69656319	69656320	MIR1279	100302182	10677	CGI	FALSE	TRUE	FALSE
cg26973714	chr12	104609524	104609525	TXNRD1	7296	3035	CGI	TRUE	TRUE	FALSE
cg02115394	chr13	115000168	115000169	CDC16	8881	-192	CGI	TRUE	FALSE	FALSE
cg02337614	chr13	112609986	112609987	SOX1	6656	-111925	CGI	FALSE	FALSE	TRUE
cg03954144	chr13	20751679	20751680	GJB2	2706	15433	CGI	FALSE	FALSE	TRUE
cg07005067	chr13	31782610	31782611	B3GALTL	145173	8497	Non-CGI	FALSE	TRUE	FALSE
cg08083251	chr13	23309930	23309931	BASP1P1	646201	162388	CGI	FALSE	FALSE	TRUE
cg08557188	chr13	113420371	113420372	ATP11A	23250	75727	CGI	FALSE	TRUE	FALSE
cg18387839	chr13	112904312	112904313	SPACA7	122258	-126337	CGI	FALSE	FALSE	TRUE
cg20806040	chr13	113497607	113497608	MCF2L	23263	-125170	CGI	FALSE	TRUE	FALSE
cg26080331	chr13	113613318	113613319	MCF2L	23263	-9459	CGI	FALSE	FALSE	TRUE
cg26224712	chr13	47127193	47127194	LRCH1	23143	-101	CGI	TRUE	FALSE	FALSE
cg04935666	chr14	105817407	105817408	BRF1	2972	-35492	CGI	FALSE	TRUE	FALSE
cg06797880	chr14	100112250	100112251	HHIPL1	84439	769	CGI-S-Shore	FALSE	TRUE	FALSE
cg09841842	chr14	51974848	51974849	FRMD6	122786	18992	Non-CGI	FALSE	TRUE	FALSE
cg11725265	chr14	104001089	104001090	TRMT61A	115708	5579	CGI-S-Shore	FALSE	TRUE	FALSE
cg13790268	chr14	100125548	100125549	HHIPL1	84439	14067	CGI	FALSE	TRUE	FALSE
cg18383486	chr14	104928472	104928473	C14orf180	400258	-117582	CGI	FALSE	FALSE	TRUE
cg18391978	chr14	97129577	97129578	VRK1	7443	-134105	CGI	FALSE	FALSE	TRUE
cg19741455	chr14	55494023	55494024	SOCS4	122809	178	CGI	TRUE	FALSE	FALSE
cg19813015	chr14	104896001	104896002	C14orf180	400258	-150053	CGI	FALSE	FALSE	TRUE
cg22920967	chr14	104047722	104047723	KLC1	3831	18422	CGI-N-Shore	FALSE	TRUE	FALSE
cg00221709	chr15	96905554	96905555	MIR1469	100302258	29063	CGI-S-Shore	FALSE	FALSE	TRUE
cg01250563	chr15	24142935	24142936	NDN	4692	-210484	Non-CGI	FALSE	FALSE	TRUE
cg03188200	chr15	25436244	25436245	SNORD115-9	100033446	-317	Non-CGI	TRUE	FALSE	FALSE
cg03479535	chr15	100889701	100889702	FLJ42289	388182	1220	CGI	TRUE	TRUE	FALSE
cg06602594	chr15	85259794	85259795	SEC11A	23478	-119	CGI-S-Shore	TRUE	FALSE	FALSE
cg09396068	chr15	22940794	22940795	CYFIP1	23191	48109	CGI	FALSE	TRUE	FALSE
cg10316525	chr15	40572137	40572138	ANKRD63	100131244	2648	CGI	FALSE	FALSE	TRUE
cg11683125	chr15	51385476	51385477	TNFAIP8L3	388121	11995	CGI-N-Shore	FALSE	TRUE	FALSE
cg12491688	chr15	44580831	44580832	CASC4	113201	-76	CGI	TRUE	FALSE	FALSE
cg12789522	chr15	78423758	78423759	CIB2	10518	118	CGI	TRUE	FALSE	FALSE
cg14076977	chr15	40600284	40600285	PLCB2	5330	-109	Non-CGI	TRUE	FALSE	FALSE
cg19010490	chr15	37388127	37388128	MEIS2	4212	5371	CGI	FALSE	TRUE	FALSE
cg22770592	chr15	63797403	63797404	USP3	9960	592	CGI	FALSE	TRUE	FALSE
cg24033871	chr15	96895341	96895342	MIR1469	100302258	18850	CGI	FALSE	FALSE	TRUE
cg01440497	chr16	1273484	1273485	TPSG1	25823	1768	CGI-S-Shore	FALSE	TRUE	FALSE
cg01712359	chr16	88783355	88783356	MIR4722	100616167	-609	CGI	TRUE	TRUE	FALSE
cg01904216	chr16	85454460	85454461	LOC727710	727710	-117457	CGI-N-Shore	FALSE	FALSE	TRUE
cg06880615	chr16	10051500	10051501	GRIN2A	2903	225109	Non-CGI	FALSE	TRUE	FALSE
cg08015447	chr16	6070188	6070189	RBFOX1	54715	1055	CGI	FALSE	TRUE	FALSE
cg09202227	chr16	68482715	68482716	SMPD3	55512	-305	CGI	TRUE	FALSE	FALSE
cg09367545	chr16	1233640	1233641	CACNA1H	8912	30398	CGI	FALSE	TRUE	FALSE
cg09717923	chr16	1440498	1440499	UNKL	64718	24205	CGI	FALSE	TRUE	FALSE
cg09981013	chr16	88008551	88008552	BANP	54971	24312	CGI	FALSE	TRUE	FALSE
cg10446007	chr16	68345126	68345127	PRMT7	54496	248	CGI	TRUE	TRUE	FALSE
cg10471544	chr16	1820375	1820376	NME3	4832	1333	CGI	FALSE	TRUE	FALSE
cg16357224	chr16	86530053	86530054	FENDRR	400550	12411	CGI	FALSE	TRUE	FALSE
cg26512406	chr16	28223152	28223153	XPO6	23214	36	CGI	TRUE	FALSE	FALSE
cg26832183	chr16	56221534	56221535	LOC283856	283856	3470	CGI-N-Shelf	FALSE	TRUE	FALSE
cg00675156	chr17	46871867	46871868	TTLL6	284076	22600	Non-CGI	TRUE	TRUE	FALSE
cg01621090	chr17	76450776	76450777	PGS1	9489	76040	CGI-S-Shore	FALSE	TRUE	FALSE
cg08838784	chr17	16557147	16557148	ZNF624	57547	18	CGI	TRUE	FALSE	FALSE
cg09232069	chr17	75143118	75143119	SCARNA16	677781	57728	Non-CGI	FALSE	TRUE	FALSE
cg10690919	chr17	48912545	48912546	WFIKKN2	124857	533	CGI	TRUE	TRUE	FALSE
cg12842219	chr17	41476263	41476264	ARL4D	379	-88	CGI	TRUE	FALSE	FALSE
cg14947218	chr17	41278197	41278198	NBR2	10230	596	CGI	TRUE	TRUE	FALSE
cg16263848	chr17	9018806	9018807	NTN1	9423	93946	CGI-N-Shore	FALSE	TRUE	FALSE
cg17094688	chr17	17380209	17380210	MED9	55090	-89	CGI-N-Shore	TRUE	FALSE	FALSE
cg18954504	chr17	34819740	34819741	TBC1D3G	654341	-11636	CGI-N-Shore	FALSE	FALSE	TRUE
cg18955426	chr17	58677584	58677585	PPM1D	8493	39	CGI	TRUE	FALSE	FALSE
cg19735250	chr17	43318610	43318611	MAP3K14-AS1	100133991	-6691	CGI	TRUE	TRUE	FALSE
cg20851790	chr17	78330477	78330478	ENDOV	284131	-58488	CGI-S-Shore	FALSE	TRUE	FALSE
cg21481503	chr17	54655317	54655318	NOG	9241	-15741	Non-CGI	FALSE	FALSE	TRUE
cg22300619	chr17	40699809	40699810	HSD17B1	3292	-4173	CGI	FALSE	FALSE	TRUE
cg22435810	chr17	18164253	18164254	SMCR7	125170	404	CGI	TRUE	TRUE	FALSE
cg23887396	chr17	26699551	26699552	VTN	7448	-2177	CGI	FALSE	TRUE	FALSE
cg24159547	chr17	73128072	73128073	NT5C	30833	-181	CGI	TRUE	FALSE	FALSE
cg24768974	chr17	47337641	47337642	FLJ40194	124871	12035	CGI	FALSE	FALSE	TRUE
cg25592977	chr17	50237315	50237316	CA10	56934	60	CGI	TRUE	FALSE	FALSE
cg01197864	chr18	8789568	8789569	SOGA2	23255	82158	CGI-S-Shelf	TRUE	TRUE	FALSE
cg13506219	chr18	60193840	60193841	ZCCHC2	54877	3181	CGI	FALSE	TRUE	FALSE
cg16716993	chr18	21977874	21977875	OSBPL1A	114876	-40	CGI	TRUE	FALSE	FALSE
cg27026585	chr18	14747080	14747081	ANKRD30B	374860	-1157	CGI-N-Shore	TRUE	FALSE	FALSE
cg01099031	chr19	53466188	53466189	ZNF816-ZNF321P	100529240	-23	CGI	TRUE	FALSE	FALSE
cg01268683	chr19	53141620	53141621	ZNF137P	7696	41682	CGI	TRUE	TRUE	FALSE
cg02718654	chr19	40971802	40971803	BLVRB	645	-76	CGI	TRUE	FALSE	FALSE
cg02999013	chr19	36195455	36195456	ZBTB32	27033	-8373	CGI-S-Shore	FALSE	FALSE	TRUE
cg03125498	chr19	34112111	34112112	CHST8	64377	-748	CGI-N-Shore	TRUE	FALSE	FALSE
cg06515543	chr19	5823791	5823792	NRTN	4902	-25	CGI-S-Shore	TRUE	FALSE	FALSE
cg07742499	chr19	55851016	55851017	SUV420H2	84787	-203	CGI	TRUE	FALSE	FALSE
cg09301254	chr19	42348327	42348328	LYPD4	147719	179	CGI-N-Shore	TRUE	FALSE	FALSE
cg12186702	chr19	17487908	17487909	PLVAP	83483	227	CGI	TRUE	FALSE	FALSE
cg14972743	chr19	58609960	58609961	ZSCAN18	65982	19831	CGI-S-Shore	TRUE	TRUE	FALSE
cg15768901	chr19	41120329	41120330	LTBP4	8425	21256	CGI	TRUE	TRUE	FALSE
cg15828085	chr19	30302476	30302477	CCNE1	898	-423	CGI	TRUE	FALSE	FALSE
cg20981058	chr19	37663744	37663745	ZNF585A	199704	-128	CGI	TRUE	FALSE	FALSE
cg23485436	chr19	5048645	5048646	KDM4B	23030	79520	CGI	FALSE	TRUE	FALSE
cg24779751	chr19	36545850	36545851	WDR62	284403	66	CGI	TRUE	FALSE	FALSE
cg25382352	chr19	1795638	1795639	ATP8B3	148229	16630	CGI-N-Shore	FALSE	TRUE	FALSE
cg25739316	chr19	39897275	39897276	ZFP36	7538	-210	CGI	TRUE	FALSE	FALSE
cg06147822	chr20	57466905	57466906	GNAS-AS1	149775	-40946	CGI-S-Shore	TRUE	TRUE	FALSE
cg09077167	chr20	55209271	55209272	TFAP2C	7022	4912	CGI-S-Shelf	FALSE	TRUE	FALSE
cg12211074	chr20	56102501	56102502	CTCFL	140690	-1792	CGI	TRUE	FALSE	FALSE
cg12347346	chr20	44803686	44803687	CD40	958	56779	CGI-S-Shore	FALSE	TRUE	FALSE
cg20845748	chr21	45719832	45719833	PFKL	5211	-91	CGI	TRUE	FALSE	FALSE
cg22858667	chr21	40757750	40757751	WRB	7485	5536	CGI	TRUE	TRUE	FALSE
cg23690480	chr21	46410455	46410456	LINC00163	727699	3544	CGI	FALSE	TRUE	FALSE
cg03263514	chr22	19711036	19711037	SEPT5-GP1BB	100526833	9048	CGI	TRUE	TRUE	FALSE
cg03282993	chr22	17602259	17602260	CECR6	27439	-1	CGI	TRUE	FALSE	FALSE
cg08819022	chr22	18531447	18531448	FLJ41941	100192420	19295	CGI	FALSE	FALSE	TRUE
cg00032643	chr1	3700680	3700681	SMIM1	388588	11327	CGI	FALSE	TRUE	FALSE
cg00344655	chr1	21604592	21604593	LOC100506801	100506801	-15189	Non-CGI	TRUE	TRUE	FALSE
cg00500989	chr1	156253073	156253074	TMEM79	84283	368	CGI-S-Shore	TRUE	TRUE	FALSE
cg00560632	chr1	19147074	19147075	TAS1R2	80834	39079	CGI	FALSE	FALSE	TRUE
cg00700866	chr1	38096105	38096106	RSPO1	284654	4488	CGI-N-Shelf	FALSE	TRUE	FALSE
cg00825690	chr1	64960202	64960203	CACHD1	57685	23725	Non-CGI	FALSE	TRUE	FALSE
cg00997264	chr1	219259351	219259352	LOC643723	643723	87777	Non-CGI	FALSE	TRUE	FALSE
cg01082602	chr1	7726441	7726442	VAMP3	9341	-104886	CGI-S-Shore	FALSE	TRUE	FALSE
cg01379846	chr1	38227521	38227522	EPHA10	284656	3301	CGI	FALSE	TRUE	FALSE
cg01809217	chr1	240656342	240656343	GREM2	64388	119118	CGI	TRUE	TRUE	FALSE
cg01834027	chr1	29240256	29240257	EPB41	2035	26652	CGI-N-Shore	TRUE	TRUE	FALSE
cg02211983	chr1	152086879	152086880	TCHHL1	126637	-25338	CGI-S-Shore	TRUE	TRUE	FALSE
cg02451774	chr1	147801218	147801219	PPIAL4B	653505	154199	CGI	TRUE	TRUE	FALSE
cg02493217	chr1	42806405	42806406	FOXJ3	22887	-4856	Non-CGI	FALSE	FALSE	TRUE
cg02557906	chr1	220102517	220102518	SLC30A10	55532	29470	CGI-S-Shore	TRUE	TRUE	FALSE
cg02574734	chr1	116369351	116369352	NHLH2	4808	14394	CGI-N-Shore	FALSE	FALSE	TRUE
cg02905426	chr1	28051771	28051772	FAM76A	199870	-717	CGI-N-Shore	TRUE	FALSE	FALSE
cg02991924	chr1	228193237	228193238	WNT3A	89780	-1484	CGI-N-Shore	TRUE	FALSE	FALSE
cg03199575	chr1	220701761	220701762	MARK1	4139	192	CGI	TRUE	FALSE	FALSE
cg03298073	chr1	209404846	209404847	MIR205HG	642587	-197320	CGI-N-Shore	FALSE	FALSE	TRUE
cg03543985	chr1	223854639	223854640	CAPN8	388743	-1202	Non-CGI	TRUE	FALSE	FALSE
cg03888033	chr1	156818905	156818906	INSRR	3645	9805	CGI	FALSE	TRUE	FALSE
cg03987806	chr1	15985365	15985366	RSC1A1	6248	-997	Non-CGI	TRUE	TRUE	FALSE
cg04156383	chr1	144995889	144995890	LOC653513	653513	44101	CGI-S-Shore	TRUE	TRUE	FALSE
cg04232360	chr1	2792744	2792745	TTC34	100287898	-86513	CGI	FALSE	FALSE	TRUE
cg04260955	chr1	225039676	225039677	DNAH14	127602	-77678	Non-CGI	FALSE	FALSE	TRUE
cg04432133	chr1	201506615	201506616	RPS10P7	376693	17582	CGI-N-Shore	FALSE	FALSE	TRUE
cg04667458	chr1	24105319	24105320	PITHD1	57095	442	CGI-S-Shore	TRUE	TRUE	FALSE
cg04758387	chr1	1851384	1851385	TMEM52	339456	-643	CGI-S-Shore	TRUE	FALSE	FALSE
cg05035280	chr1	1909092	1909093	KIAA1751	85452	26182	CGI-S-Shore	FALSE	TRUE	FALSE
cg05348973	chr1	110697298	110697299	SLC6A17	388662	4165	CGI-S-Shelf	FALSE	TRUE	FALSE
cg05746024	chr1	154540074	154540075	CHRNB2	1141	-181	CGI-N-Shore	TRUE	FALSE	FALSE
cg05958127	chr1	120254177	120254178	PHGDH	26227	-240	CGI-N-Shore	TRUE	FALSE	FALSE
cg06063714	chr1	1951514	1951515	GABRD	2563	745	CGI-S-Shore	FALSE	TRUE	FALSE
cg06090867	chr1	20511782	20511783	UBXN10	127733	-794	CGI-N-Shore	TRUE	FALSE	FALSE
cg06470943	chr1	40839093	40839094	SMAP2	64744	-283	CGI-N-Shore	TRUE	FALSE	FALSE
cg06556218	chr1	39269537	39269538	MYCBP	26292	69511	CGI-N-Shore	FALSE	FALSE	TRUE
cg06636289	chr1	40781617	40781618	COL9A2	1298	1441	CGI	FALSE	TRUE	FALSE
cg06980565	chr1	3378226	3378227	ARHGEF16	27237	7078	CGI	FALSE	TRUE	FALSE
cg07045460	chr1	3194247	3194248	MIR4251	100422968	149707	CGI-S-Shore	FALSE	TRUE	FALSE
cg07154254	chr1	201979128	201979129	ELF3	1999	2054	Non-CGI	TRUE	FALSE	FALSE
cg07552723	chr1	14092249	14092250	PRDM2	7799	65513	Non-CGI	FALSE	TRUE	FALSE
cg07833779	chr1	112050772	112050773	C1orf162	128346	34167	Non-CGI	FALSE	TRUE	FALSE
cg08535515	chr1	244816088	244816089	DESI2	51029	-262	CGI	TRUE	FALSE	FALSE
cg09510416	chr1	33348115	33348116	HPCA	3208	-3981	CGI-N-Shelf	FALSE	FALSE	TRUE
cg09678367	chr1	25870822	25870823	LDLRAP1	26119	745	CGI	FALSE	TRUE	FALSE
cg10379418	chr1	53936188	53936189	DMRTB1	63948	11115	CGI	FALSE	FALSE	TRUE
cg10392572	chr1	56046489	56046490	MIR4422	100616272	355174	Non-CGI	TRUE	FALSE	FALSE
cg10444683	chr1	14140248	14140249	PRDM2	7799	113512	Non-CGI	FALSE	TRUE	FALSE
cg11155265	chr1	23811445	23811446	ASAP3	55616	-387	CGI	TRUE	FALSE	FALSE
cg11394947	chr1	19074199	19074200	TAS1R2	80834	111954	Non-CGI	FALSE	TRUE	FALSE
cg11417178	chr1	20696747	20696748	LOC339505	339505	58538	CGI-S-Shelf	FALSE	TRUE	FALSE
cg12585910	chr1	161994363	161994364	OLFML2B	25903	-718	CGI-S-Shore	TRUE	FALSE	FALSE
cg13465000	chr1	9670867	9670868	TMEM201	199953	21934	CGI	FALSE	TRUE	FALSE
cg13885623	chr1	11919095	11919096	NPPB	4879	-102	CGI	TRUE	FALSE	FALSE
cg14087574	chr1	1963794	1963795	GABRD	2563	13025	CGI-S-Shore	FALSE	FALSE	TRUE
cg14164492	chr1	9439003	9439004	SPSB1	80176	86061	Non-CGI	FALSE	FALSE	TRUE
cg15102821	chr1	1844801	1844802	CALML6	163688	-1463	CGI-S-Shelf	TRUE	FALSE	FALSE
cg15261221	chr1	228651848	228651849	MIR4666A	100616308	2072	CGI	TRUE	FALSE	FALSE
cg15858059	chr1	154543819	154543820	CHRNB2	1141	3561	CGI-N-Shore	FALSE	TRUE	FALSE
cg16172549	chr1	161229214	161229215	PCP4L1	654790	696	CGI-S-Shore	FALSE	TRUE	FALSE
cg16698116	chr1	149981734	149981735	OTUD7B	56957	950	CGI	FALSE	TRUE	FALSE
cg17431888	chr1	183203863	183203864	LAMC2	3918	48688	Non-CGI	FALSE	TRUE	FALSE
cg17885794	chr1	176521193	176521194	PAPPA2	60676	88885	Non-CGI	FALSE	TRUE	FALSE
cg18167340	chr1	44679636	44679637	DMAP1	55929	510	CGI-S-Shore	FALSE	TRUE	FALSE
cg18383680	chr1	162335231	162335232	C1orf111	284680	11411	CGI-N-Shore	TRUE	TRUE	FALSE
cg18433086	chr1	179199613	179199614	ABL2	27	-793	CGI-S-Shore	TRUE	FALSE	FALSE
cg18769374	chr1	37056965	37056966	CSF3R	1441	-108049	Non-CGI	FALSE	FALSE	TRUE
cg18795169	chr1	18902165	18902166	PAX7	5081	-55333	Non-CGI	FALSE	FALSE	TRUE
cg19769301	chr1	149147625	149147626	LOC388692	388692	-131849	CGI	FALSE	FALSE	TRUE
cg19944463	chr1	160068529	160068530	IGSF8	93185	87	CGI	TRUE	TRUE	FALSE
cg20243176	chr1	113008524	113008525	WNT2B	7482	-1514	CGI-N-Shore	TRUE	FALSE	FALSE
cg20486246	chr1	27338787	27338788	FAM46B	115572	544	CGI-N-Shore	FALSE	TRUE	FALSE
cg20488341	chr1	9896309	9896310	CLSTN1	22883	-11758	Non-CGI	FALSE	FALSE	TRUE
cg20687616	chr1	56883736	56883737	PPAP2B	8613	161519	Non-CGI	FALSE	FALSE	TRUE
cg22039566	chr1	22927865	22927866	C1QA	712	-35251	CGI-S-Shore	FALSE	TRUE	FALSE
cg22359828	chr1	181514216	181514217	CACNA1E	777	61529	Non-CGI	FALSE	TRUE	FALSE
cg22608619	chr1	10703231	10703232	CASZ1	54897	153474	CGI-S-Shore	FALSE	TRUE	FALSE
cg22723818	chr1	152488368	152488369	CRCT1	54544	1389	CGI	FALSE	TRUE	FALSE
cg22822803	chr1	3566950	3566951	WRAP73	49856	-278	CGI-S-Shore	TRUE	FALSE	FALSE
cg22879626	chr1	240656586	240656587	GREM2	64388	118874	CGI	TRUE	TRUE	FALSE
cg23090529	chr1	51442133	51442134	CDKN2C	1031	8524	CGI-N-Shore	FALSE	FALSE	TRUE
cg23110514	chr1	152538888	152538889	LCE3E	353145	358	Non-CGI	TRUE	TRUE	FALSE
cg23164855	chr1	6301170	6301171	HES3	390992	-3080	CGI-N-Shore	FALSE	FALSE	TRUE
cg23688719	chr1	65935654	65935655	LEPR	3953	49522	Non-CGI	FALSE	TRUE	FALSE
cg23993425	chr1	20880591	20880592	FAM43B	163933	1658	CGI	TRUE	FALSE	FALSE
cg24327109	chr1	151020084	151020085	C1orf56	54964	-173	CGI-N-Shore	TRUE	FALSE	FALSE
cg24436462	chr1	183595745	183595746	ARPC5	10092	9238	Non-CGI	FALSE	TRUE	FALSE
cg24843535	chr1	146525992	146525993	LOC728989	728989	-11392	CGI-S-Shelf	FALSE	FALSE	TRUE
cg26161057	chr1	27881600	27881601	AHDC1	27245	48759	CGI-S-Shelf	FALSE	TRUE	FALSE
cg26530301	chr1	19000726	19000727	PAX7	5081	43225	Non-CGI	FALSE	TRUE	FALSE
cg26603179	chr1	223566646	223566647	C1orf65	164127	-67	CGI-N-Shore	TRUE	FALSE	FALSE
cg26802564	chr1	30446406	30446407	MATN1-AS1	100129196	-745211	Non-CGI	FALSE	FALSE	TRUE
cg27529871	chr1	50881885	50881886	DMRTA2	63950	7232	CGI	FALSE	FALSE	TRUE
cg00066942	chr2	149401448	149401449	EPC2	26122	-1110	CGI-N-Shore	TRUE	FALSE	FALSE
cg00189101	chr2	242088304	242088305	PPP1R7	5510	-718	CGI-N-Shore	TRUE	TRUE	FALSE
cg00521863	chr2	171783942	171783943	GORASP2	26003	-1004	CGI-N-Shore	TRUE	FALSE	FALSE
cg01104198	chr2	203735673	203735674	ICA1L	130026	696	CGI	FALSE	TRUE	FALSE
cg01196788	chr2	19561709	19561710	OSR1	130497	-3336	CGI	FALSE	FALSE	TRUE
cg01471264	chr2	119597415	119597416	EN1	2019	8342	CGI-N-Shore	FALSE	FALSE	TRUE
cg01965462	chr2	213400697	213400698	ERBB4	2066	2653	CGI-N-Shore	FALSE	TRUE	FALSE
cg02156783	chr2	240639549	240639550	LOC150935	150935	-45003	CGI-N-Shore	FALSE	FALSE	TRUE
cg02172492	chr2	19553422	19553423	OSR1	130497	4948	CGI	FALSE	TRUE	FALSE
cg02317832	chr2	237172964	237172965	ASB18	401036	22	Non-CGI	TRUE	FALSE	FALSE
cg03539474	chr2	172751088	172751089	SLC25A12	8604	-274	CGI	TRUE	FALSE	FALSE
cg03595348	chr2	95999906	95999907	KCNIP3	30818	36833	Non-CGI	FALSE	TRUE	FALSE
cg03793872	chr2	134770255	134770256	MIR3679	100500878	-114439	CGI-S-Shelf	FALSE	FALSE	TRUE
cg04166544	chr2	230580574	230580575	DNER	92737	-1287	CGI-S-Shore	TRUE	FALSE	FALSE
cg04361749	chr2	240980455	240980456	PRR21	643905	1942	CGI-N-Shore	FALSE	FALSE	TRUE
cg04573031	chr2	240098654	240098655	MGC16025	85009	18497	CGI-N-Shore	TRUE	TRUE	FALSE
cg04722593	chr2	91754847	91754848	LOC654342	654342	93126	CGI-S-Shelf	FALSE	FALSE	TRUE
cg05184394	chr2	131512773	131512774	AMER3	205147	-302	CGI-N-Shore	TRUE	FALSE	FALSE
cg06145336	chr2	177027931	177027932	HOXD3	3232	-872	CGI	TRUE	FALSE	FALSE
cg06267200	chr2	73403921	73403922	NOTO	344022	-25463	CGI-S-Shore	FALSE	FALSE	TRUE
cg06873461	chr2	115822184	115822185	LOC389023	389023	96734	Non-CGI	TRUE	TRUE	FALSE
cg06881572	chr2	170223771	170223772	LRP2	4036	-4648	CGI-S-Shelf	FALSE	FALSE	TRUE
cg07197092	chr2	79008089	79008090	REG3G	130120	-244735	CGI-S-Shore	FALSE	FALSE	TRUE
cg07460010	chr2	176985174	176985175	HOXD9	3235	-2237	CGI-S-Shore	FALSE	FALSE	TRUE
cg08031492	chr2	469214	469215	FAM150B	285016	-180905	CGI	FALSE	FALSE	TRUE
cg08640046	chr2	237088661	237088662	GBX2	2637	-12008	CGI	FALSE	FALSE	TRUE
cg08972756	chr2	71133854	71133855	VAX2	25806	6133	CGI-S-Shore	FALSE	TRUE	FALSE
cg09012544	chr2	71503562	71503563	ZNF638	27332	-159	CGI	TRUE	FALSE	FALSE
cg09759994	chr2	113238376	113238377	TTL	150465	-1365	CGI-N-Shore	TRUE	FALSE	FALSE
cg09990169	chr2	241835740	241835741	C2orf54	79919	-166	CGI-S-Shore	TRUE	FALSE	FALSE
cg10014308	chr2	73518221	73518222	EGR4	1961	2606	CGI-N-Shore	FALSE	TRUE	FALSE
cg10984625	chr2	238599858	238599859	LRRFIP1	9208	63633	CGI	TRUE	TRUE	FALSE
cg11641595	chr2	224902102	224902103	SERPINE2	5270	1932	CGI-N-Shore	FALSE	TRUE	FALSE
cg11877061	chr2	71133502	71133503	VAX2	25806	5781	CGI-S-Shore	FALSE	TRUE	FALSE
cg12035103	chr2	3467180	3467181	ADI1	55256	56168	CGI-S-Shore	FALSE	TRUE	FALSE
cg12203072	chr2	242878811	242878812	CXXC11	285093	66924	CGI	FALSE	FALSE	TRUE
cg12912981	chr2	81708953	81708954	LRRTM1	347730	-1177465	CGI	FALSE	FALSE	TRUE
cg13066289	chr2	134135267	134135268	NCKAP5	344148	190762	Non-CGI	FALSE	TRUE	FALSE
cg13254518	chr2	180457494	180457495	MIR1258	100302172	268139	Non-CGI	FALSE	TRUE	FALSE
cg13602816	chr2	131674221	131674222	ARHGEF4	50649	1434	CGI	TRUE	FALSE	FALSE
cg13808592	chr2	164206540	164206541	FIGN	55137	385971	CGI-S-Shore	FALSE	FALSE	TRUE
cg13925895	chr2	201990619	201990620	CFLAR	8837	9741	Non-CGI	FALSE	TRUE	FALSE
cg14192174	chr2	29204117	29204118	FAM179A	165186	-45	Non-CGI	TRUE	FALSE	FALSE
cg14362178	chr2	79007750	79007751	REG3G	130120	-245074	CGI-S-Shore	FALSE	FALSE	TRUE
cg14435073	chr2	236674174	236674175	AGAP1	116987	271440	CGI	FALSE	TRUE	FALSE
cg14718170	chr2	220463257	220463258	STK11IP	114790	660	CGI-S-Shore	FALSE	TRUE	FALSE
cg15240455	chr2	162480821	162480822	SLC4A10	57282	-22	Non-CGI	TRUE	FALSE	FALSE
cg16163981	chr2	11052885	11052886	KCNF1	3754	821	CGI	TRUE	FALSE	FALSE
cg16363985	chr2	3604987	3604988	RNASEH1	246243	951	CGI-N-Shore	TRUE	TRUE	FALSE
cg16752876	chr2	19553237	19553238	MIR4757	100616307	5046	CGI	FALSE	TRUE	FALSE
cg16909084	chr2	1711796	1711797	PXDN	7837	36493	CGI	FALSE	TRUE	FALSE
cg17208060	chr2	11680086	11680087	MIR4429	100616469	715	Non-CGI	TRUE	TRUE	FALSE
cg17287026	chr2	237079967	237079968	GBX2	2637	-3314	CGI	FALSE	FALSE	TRUE
cg17334840	chr2	169763832	169763833	G6PC2	57818	6081	Non-CGI	FALSE	TRUE	FALSE
cg17512187	chr2	85082845	85082846	TRABD2A	129293	25405	Non-CGI	FALSE	TRUE	FALSE
cg18449120	chr2	5832882	5832883	SOX11	6664	82	CGI	TRUE	FALSE	FALSE
cg18859776	chr2	215275054	215275055	VWC2L	402117	-1405	Non-CGI	TRUE	TRUE	FALSE
cg20607221	chr2	241078542	241078543	OTOS	150677	1529	CGI-S-Shore	FALSE	TRUE	FALSE
cg20812988	chr2	134432622	134432623	NCKAP5	344148	-106590	Non-CGI	FALSE	FALSE	TRUE
cg20841047	chr2	207506675	207506676	LOC200726	200726	-465	CGI-N-Shore	TRUE	FALSE	FALSE
cg21402265	chr2	220197046	220197047	RESP18	389075	851	CGI-S-Shore	TRUE	TRUE	FALSE
cg21595549	chr2	217045817	217045818	PKI55	150967	-35793	Non-CGI	FALSE	TRUE	FALSE
cg22996440	chr2	31361818	31361819	GALNT14	79623	16248	CGI-S-Shore	TRUE	TRUE	FALSE
cg23022574	chr2	219866218	219866219	MIR375	494324	210	CGI	FALSE	FALSE	TRUE
cg23219064	chr2	84171179	84171180	FUNDC2P2	388965	-346625	Non-CGI	FALSE	FALSE	TRUE
cg23400904	chr2	70418872	70418873	C2orf42	54980	-720	CGI-S-Shore	TRUE	FALSE	FALSE
cg23531340	chr2	18058900	18058901	KCNS3	3790	-212	CGI-N-Shore	TRUE	FALSE	FALSE
cg23899779	chr2	241190395	241190396	OTOS	150677	-110321	Non-CGI	FALSE	FALSE	TRUE
cg24107142	chr2	75060355	75060356	HK2	3099	572	CGI-N-Shore	TRUE	FALSE	FALSE
cg24469412	chr2	133430523	133430524	LYPD1	116372	-1452	CGI-S-Shore	TRUE	TRUE	FALSE
cg24986868	chr2	159312599	159312600	CCDC148	130940	664	CGI-N-Shore	TRUE	TRUE	FALSE
cg25588844	chr2	10037561	10037562	TAF1B	9014	53989	Non-CGI	FALSE	TRUE	FALSE
cg26294037	chr2	222683753	222683754	EPHA4	2043	-246742	Non-CGI	FALSE	FALSE	TRUE
cg26975848	chr2	104961016	104961017	LOC100287010	100287010	63772	Non-CGI	FALSE	FALSE	TRUE
cg27373387	chr2	10592414	10592415	ODC1	4953	-3960	CGI-S-Shelf	FALSE	FALSE	TRUE
cg27389290	chr2	196944767	196944768	DNAH7	56171	-11230	Non-CGI	FALSE	FALSE	TRUE
cg00172020	chr3	150264474	150264475	EIF2A	83939	-98	CGI	TRUE	TRUE	FALSE
cg00247334	chr3	8811543	8811544	OXTR	5021	-242	CGI-S-Shore	TRUE	FALSE	FALSE
cg00487142	chr3	109056357	109056358	DPPA4	55211	60	Non-CGI	TRUE	FALSE	FALSE
cg00901598	chr3	172164984	172164985	GHSR	2693	1260	CGI-N-Shore	FALSE	TRUE	FALSE
cg01059398	chr3	172235808	172235809	TNFSF10	8743	5487	Non-CGI	FALSE	TRUE	FALSE
cg02237172	chr3	50380958	50380959	ZMYND10	51364	2196	CGI-N-Shore	FALSE	TRUE	FALSE
cg03223076	chr3	48698558	48698559	CELSR3	1951	11421	CGI	TRUE	TRUE	FALSE
cg03282600	chr3	129744870	129744871	TRH	7200	51755	CGI	FALSE	FALSE	TRUE
cg05450804	chr3	72976561	72976562	GXYLT2	727936	39175	CGI-N-Shore	FALSE	TRUE	FALSE
cg06185146	chr3	63428305	63428306	SYNPR	132204	164390	Non-CGI	TRUE	TRUE	FALSE
cg07104253	chr3	47412988	47412989	PTPN23	25930	-9501	Non-CGI	FALSE	FALSE	TRUE
cg07291439	chr3	147125926	147125927	ZIC1	7545	-1253	CGI-S-Shore	TRUE	FALSE	FALSE
cg07864327	chr3	127690108	127690109	KBTBD12	166348	55789	Non-CGI	FALSE	TRUE	FALSE
cg08017400	chr3	141203940	141203941	RASA2	5922	-1984	CGI-N-Shore	TRUE	FALSE	FALSE
cg08089200	chr3	137485266	137485267	SOX14	8403	2131	CGI	FALSE	FALSE	TRUE
cg08360599	chr3	141087261	141087262	ZBTB38	253461	44205	Non-CGI	FALSE	TRUE	FALSE
cg09226275	chr3	176773597	176773598	TBL1XR1	79718	141449	Non-CGI	FALSE	TRUE	FALSE
cg10125901	chr3	5071083	5071084	BHLHE40-AS1	100507582	-49436	CGI-S-Shelf	FALSE	FALSE	TRUE
cg10557828	chr3	145879642	145879643	PLOD2	5352	-359	CGI	TRUE	FALSE	FALSE
cg10585661	chr3	184056618	184056619	FAM131A	131408	2900	CGI	TRUE	TRUE	FALSE
cg10685228	chr3	183750284	183750285	HTR3D	200909	951	Non-CGI	TRUE	TRUE	FALSE
cg11303738	chr3	42977889	42977890	KRBOX1	100506243	54	CGI	TRUE	FALSE	FALSE
cg11687036	chr3	147139563	147139564	ZIC1	7545	12381	CGI	FALSE	FALSE	TRUE
cg12230883	chr3	184035527	184035528	EIF4G1	1981	3243	CGI-S-Shelf	TRUE	TRUE	FALSE
cg12479512	chr3	175987813	175987814	MIR4789	100616395	900483	Non-CGI	FALSE	FALSE	TRUE
cg12899747	chr3	25391527	25391528	RARB	5915	175703	Non-CGI	FALSE	TRUE	FALSE
cg14528596	chr3	126438050	126438051	CHCHD6	84303	14931	Non-CGI	FALSE	TRUE	FALSE
cg14651453	chr3	62358825	62358826	FEZF2	55079	363	CGI	TRUE	TRUE	FALSE
cg14968361	chr3	39543547	39543548	MOBP	4336	34476	CGI-N-Shore	TRUE	TRUE	FALSE
cg15084803	chr3	14160960	14160961	CHCHD4	131474	5409	Non-CGI	FALSE	TRUE	FALSE
cg16947394	chr3	52930628	52930629	TMEM110-MUSTN1	100526772	967	CGI-N-Shore	FALSE	TRUE	FALSE
cg18082362	chr3	131854912	131854913	CPNE4	131034	149340	CGI-N-Shore	FALSE	TRUE	FALSE
cg18343556	chr3	50316384	50316385	C3orf45	132228	-132	CGI-S-Shore	TRUE	FALSE	FALSE
cg19081389	chr3	156273098	156273099	SSR3	6747	-124	CGI	TRUE	FALSE	FALSE
cg19207090	chr3	47053445	47053446	NRADDP	100129354	412	CGI-S-Shore	FALSE	TRUE	FALSE
cg22688399	chr3	61234515	61234516	FHIT	2272	2616	CGI-N-Shore	FALSE	TRUE	FALSE
cg22714811	chr3	42977896	42977897	KRBOX1	100506243	61	CGI	TRUE	FALSE	FALSE
cg22821981	chr3	122296435	122296436	PARP15	165631	-12	CGI-N-Shore	TRUE	FALSE	FALSE
cg23502565	chr3	157156180	157156181	PTX3	5806	1599	CGI	FALSE	TRUE	FALSE
cg24034357	chr3	122688639	122688640	SEMA5B	54437	58811	Non-CGI	FALSE	TRUE	FALSE
cg24650229	chr3	118864825	118864826	IGSF11	152404	71	CGI-N-Shore	TRUE	FALSE	FALSE
cg25493589	chr3	42307193	42307194	CCK	885	467	CGI	TRUE	FALSE	FALSE
cg25503888	chr3	147138293	147138294	ZIC1	7545	11111	CGI-S-Shore	FALSE	FALSE	TRUE
cg25754485	chr3	42708983	42708984	ZBTB47	92999	13806	CGI-S-Shelf	FALSE	TRUE	FALSE
cg27059819	chr3	127347685	127347686	PODXL2	50512	-352	CGI-N-Shore	TRUE	FALSE	FALSE
cg27137836	chr3	125775693	125775694	SLC41A3	54946	44696	Non-CGI	TRUE	TRUE	FALSE
cg27304415	chr3	77064282	77064283	ROBO2	6092	1077636	Non-CGI	FALSE	TRUE	FALSE
cg00667841	chr4	3308884	3308885	RGS12	6002	14128	CGI-N-Shore	FALSE	TRUE	FALSE
cg01437235	chr4	939027	939028	TMEM175	84286	12764	CGI-N-Shore	FALSE	TRUE	FALSE
cg01833057	chr4	7893062	7893063	AFAP1	60312	48589	Non-CGI	FALSE	TRUE	FALSE
cg02337355	chr4	493782	493783	ZNF721	170960	-339	CGI	TRUE	TRUE	FALSE
cg02373784	chr4	13537302	13537303	LOC285547	285547	-4260	CGI-S-Shore	FALSE	FALSE	TRUE
cg04343242	chr4	104000066	104000067	SLC9B2	133308	-1626	CGI-S-Shelf	TRUE	TRUE	FALSE
cg04574135	chr4	47915701	47915702	NFXL1	152518	977	CGI-N-Shore	TRUE	TRUE	FALSE
cg05029983	chr4	2068254	2068255	NAT8L	339983	7014	CGI-S-Shore	FALSE	TRUE	FALSE
cg05719818	chr4	8106273	8106274	ABLIM2	84448	54284	CGI-N-Shore	FALSE	TRUE	FALSE
cg05924254	chr4	1107720	1107721	RNF212	285498	-367	CGI	TRUE	FALSE	FALSE
cg06251489	chr4	26861983	26861984	STIM2	57620	-328	CGI	TRUE	FALSE	FALSE
cg06323052	chr4	56720686	56720687	EXOC1	55763	869	CGI-S-Shore	FALSE	TRUE	FALSE
cg06643298	chr4	8582101	8582102	CPZ	8532	-114	CGI-N-Shore	TRUE	FALSE	FALSE
cg07691684	chr4	16773677	16773678	LDB2	9079	126745	Non-CGI	FALSE	TRUE	FALSE
cg08528970	chr4	76640579	76640580	USO1	8615	-9248	Non-CGI	FALSE	FALSE	TRUE
cg08768920	chr4	88233933	88233934	HSD17B13	345275	10121	Non-CGI	FALSE	TRUE	FALSE
cg08979895	chr4	111540126	111540127	PITX2	5308	23151	CGI	FALSE	TRUE	FALSE
cg10363284	chr4	8007138	8007139	AFAP1	60312	-65484	CGI	FALSE	TRUE	FALSE
cg10525642	chr4	7373375	7373376	MIR4798	100616471	61197	CGI	FALSE	TRUE	FALSE
cg11154040	chr4	3795063	3795064	ADRA2C	152	26766	Non-CGI	FALSE	FALSE	TRUE
cg11197905	chr4	10459435	10459436	ZNF518B	85460	-402	CGI-S-Shore	TRUE	FALSE	FALSE
cg11427028	chr4	188391387	188391388	LOC339975	339975	35378	Non-CGI	FALSE	TRUE	FALSE
cg11930400	chr4	111533883	111533884	PITX2	5308	29394	CGI	FALSE	FALSE	TRUE
cg12235062	chr4	4386906	4386907	NSG1	27065	37036	CGI-N-Shore	TRUE	TRUE	FALSE
cg12346491	chr4	145277815	145277816	GYPA	2993	-215910	Non-CGI	FALSE	FALSE	TRUE
cg13622436	chr4	4341397	4341398	NSG1	27065	-8470	CGI	FALSE	FALSE	TRUE
cg13763289	chr4	58058692	58058693	IGFBP7	3490	-82140	CGI-N-Shore	FALSE	TRUE	FALSE
cg14264372	chr4	6248114	6248115	WFS1	7466	-23461	CGI-S-Shore	FALSE	FALSE	TRUE
cg14665413	chr4	38859728	38859729	TLR6	10333	-1289	Non-CGI	TRUE	FALSE	FALSE
cg14702007	chr4	119200372	119200373	SNORA24	677809	26	CGI-S-Shore	TRUE	TRUE	FALSE
cg14959580	chr4	1402198	1402199	CRIPAK	285464	16857	CGI	FALSE	FALSE	TRUE
cg15673547	chr4	981630	981631	IDUA	3425	844	CGI	FALSE	TRUE	FALSE
cg16196021	chr4	39366757	39366758	RFC1	5981	1242	CGI-N-Shore	FALSE	TRUE	FALSE
cg16876829	chr4	925652	925653	GAK	2580	520	CGI	TRUE	TRUE	FALSE
cg17312632	chr4	6227099	6227100	LOC285484	285484	24638	CGI-S-Shelf	FALSE	TRUE	FALSE
cg17394237	chr4	7196466	7196467	SORCS2	57537	2091	CGI-S-Shore	FALSE	TRUE	FALSE
cg19481816	chr4	26585351	26585352	TBC1D19	55296	-193	CGI-N-Shore	TRUE	FALSE	FALSE
cg19800035	chr4	187621327	187621328	FAT1	2195	26521	CGI	FALSE	TRUE	FALSE
cg19862930	chr4	173979501	173979502	GALNT7	51809	-110401	Non-CGI	FALSE	FALSE	TRUE
cg20212775	chr4	1164681	1164682	LOC100130872	100130872	38067	CGI	FALSE	TRUE	FALSE
cg22172309	chr4	170492620	170492621	NEK1	4750	41156	CGI-S-Shore	FALSE	TRUE	FALSE
cg22261866	chr4	187475891	187475892	MTNR1A	4543	644	CGI	FALSE	TRUE	FALSE
cg22265605	chr4	151503546	151503547	MAB21L2	10586	468	CGI	TRUE	TRUE	FALSE
cg24035112	chr4	159441687	159441688	RXFP1	59350	-1177	Non-CGI	TRUE	FALSE	FALSE
cg25424525	chr4	146096030	146096031	OTUD4	54726	4800	Non-CGI	TRUE	TRUE	FALSE
cg26351451	chr4	37248861	37248862	KIAA1239	57495	2170	CGI-S-Shore	FALSE	TRUE	FALSE
cg27108147	chr4	2401605	2401606	ZFYVE28	57732	18763	CGI	FALSE	TRUE	FALSE
cg27196467	chr4	21305490	21305491	KCNIP4-IT1	359822	549319	CGI-N-Shore	TRUE	TRUE	FALSE
cg27599831	chr4	3862054	3862055	ADRA2C	152	93757	CGI-N-Shore	FALSE	FALSE	TRUE
cg00069003	chr5	140164106	140164107	PCDHA1	56147	-1768	CGI-N-Shore	TRUE	FALSE	FALSE
cg00397559	chr5	82683873	82683874	VCAN	1462	-83618	Non-CGI	FALSE	FALSE	TRUE
cg00596763	chr5	135529293	135529294	LOC389332	389332	-441	CGI-S-Shore	TRUE	FALSE	FALSE
cg00937510	chr5	87565469	87565470	TMEM161B-AS1	100505894	769	CGI	TRUE	TRUE	FALSE
cg00984787	chr5	64855069	64855070	CENPK	64105	3924	CGI-N-Shelf	FALSE	TRUE	FALSE
cg01224715	chr5	140811520	140811521	PCDHGA12	26025	1361	CGI-S-Shore	TRUE	TRUE	FALSE
cg01914314	chr5	157117640	157117641	C5orf52	100190949	19078	CGI	FALSE	FALSE	TRUE
cg02015741	chr5	3394050	3394051	LOC285577	285577	142156	CGI	FALSE	FALSE	TRUE
cg02310229	chr5	32312285	32312286	MTMR12	54545	827	CGI-N-Shore	FALSE	TRUE	FALSE
cg02462812	chr5	140501535	140501536	PCDHB4	56131	-44	CGI	TRUE	FALSE	FALSE
cg02884181	chr5	158689508	158689509	UBLCP1	134510	-579	CGI-N-Shore	TRUE	FALSE	FALSE
cg03332113	chr5	34656078	34656079	RAI14	26064	-353	CGI	TRUE	FALSE	FALSE
cg03370704	chr5	148785408	148785409	MIR143HG	728264	-1030	Non-CGI	TRUE	FALSE	FALSE
cg03475756	chr5	177728612	177728613	AGXT2L2	85007	-68808	CGI-N-Shore	FALSE	TRUE	FALSE
cg04246144	chr5	140739501	140739502	PCDHGB2	56103	-200	CGI-N-Shore	TRUE	TRUE	FALSE
cg04592144	chr5	172899456	172899457	LOC285593	285593	-107188	Non-CGI	FALSE	FALSE	TRUE
cg04611466	chr5	3092821	3092822	C5orf38	153571	340558	CGI-N-Shore	FALSE	FALSE	TRUE
cg04677123	chr5	90466501	90466502	ARRDC3-AS1	100129716	-209661	Non-CGI	FALSE	FALSE	TRUE
cg05496514	chr5	87985513	87985514	LINC00461	645323	-4892	CGI	FALSE	FALSE	TRUE
cg06600429	chr5	160975956	160975957	GABRB2	2561	-825	CGI	TRUE	FALSE	FALSE
cg06626102	chr5	1346156	1346157	CLPTM1L	81037	-1153	CGI	TRUE	FALSE	FALSE
cg07274253	chr5	10330984	10330985	CMBL	134147	-22815	CGI-N-Shelf	FALSE	FALSE	TRUE
cg07814664	chr5	1938619	1938620	IRX4	50805	-55738	CGI-S-Shore	FALSE	FALSE	TRUE
cg07816439	chr5	159797845	159797846	C1QTNF2	114898	-196	CGI	TRUE	FALSE	FALSE
cg07895206	chr5	6492253	6492254	UBE2QL1	134111	43516	CGI	FALSE	TRUE	FALSE
cg08319922	chr5	178800355	178800356	ADAMTS2	9509	-27923	CGI	FALSE	FALSE	TRUE
cg08426962	chr5	94076140	94076141	ANKRD32	84250	121748	Non-CGI	FALSE	TRUE	FALSE
cg08440934	chr5	158689629	158689630	UBLCP1	134510	-458	CGI-N-Shore	TRUE	FALSE	FALSE
cg08763461	chr5	145710603	145710604	POU4F3	5459	-7982	CGI-N-Shelf	FALSE	FALSE	TRUE
cg08801806	chr5	175297573	175297574	CPLX2	10814	73962	CGI-N-Shore	TRUE	TRUE	FALSE
cg08835099	chr5	140198665	140198666	PCDHA5	56143	-2694	CGI-N-Shelf	FALSE	TRUE	FALSE
cg08967338	chr5	140535215	140535216	PCDHB17	54661	-363	CGI-N-Shore	TRUE	FALSE	FALSE
cg10043954	chr5	140603034	140603035	PCDHB14	56122	-42	CGI-N-Shore	TRUE	FALSE	FALSE
cg10860553	chr5	1399854	1399855	SLC6A3	6531	45687	Non-CGI	FALSE	TRUE	FALSE
cg11774548	chr5	180489057	180489058	BTNL9	153579	21831	CGI	FALSE	FALSE	TRUE
cg11835209	chr5	4512534	4512535	LOC340094	340094	-521936	CGI	FALSE	FALSE	TRUE
cg13295463	chr5	140255069	140255070	PCDHA12	56137	137	CGI-N-Shore	TRUE	TRUE	FALSE
cg13718539	chr5	140801354	140801355	PCDHGA11	56105	816	CGI	TRUE	TRUE	FALSE
cg14093365	chr5	1483764	1483765	SLC6A3	6531	-38220	CGI	FALSE	TRUE	FALSE
cg14970046	chr5	1880021	1880022	IRX4	50805	2857	CGI-S-Shore	FALSE	TRUE	FALSE
cg15123573	chr5	176827082	176827083	PFN3	345456	553	CGI-N-Shore	FALSE	FALSE	TRUE
cg15334572	chr5	600837	600838	CEP72	55722	-11566	CGI	FALSE	FALSE	TRUE
cg15405432	chr5	126409310	126409311	C5orf63	401207	-125	CGI	TRUE	FALSE	FALSE
cg15981305	chr5	87981894	87981895	LINC00461	645323	-1273	CGI-S-Shore	TRUE	FALSE	FALSE
cg16540590	chr5	43802496	43802497	NNT	23530	199704	Non-CGI	FALSE	FALSE	TRUE
cg16638920	chr5	87974012	87974013	LINC00461	645323	6606	CGI	TRUE	TRUE	FALSE
cg17259096	chr5	140201351	140201352	PCDHA5	56143	-8	CGI-N-Shore	TRUE	TRUE	FALSE
cg17727597	chr5	118159086	118159087	MIR1244-1	100302285	-151193	Non-CGI	FALSE	FALSE	TRUE
cg17838420	chr5	1877906	1877907	IRX4	50805	4972	CGI	FALSE	TRUE	FALSE
cg17974715	chr5	176869629	176869630	PRR7	80758	-4165	CGI-N-Shelf	FALSE	TRUE	FALSE
cg18503711	chr5	64859377	64859378	PPWD1	23398	245	CGI	TRUE	TRUE	FALSE
cg18505978	chr5	100241630	100241631	ST8SIA4	7903	-2642	CGI-S-Shore	FALSE	FALSE	TRUE
cg18909295	chr5	175223293	175223294	CPLX2	10814	-315	CGI-N-Shore	TRUE	FALSE	FALSE
cg19037350	chr5	140734648	140734649	PCDHGA4	56111	-118	CGI-N-Shore	TRUE	TRUE	FALSE
cg19038160	chr5	150329882	150329883	ZNF300P1	134466	-3735	CGI-S-Shelf	FALSE	FALSE	TRUE
cg19233472	chr5	169532752	169532753	FOXI1	2299	-163	CGI	TRUE	FALSE	FALSE
cg19607387	chr5	125570542	125570543	GRAMD3	65983	-125244	Non-CGI	FALSE	FALSE	TRUE
cg19874640	chr5	134527449	134527450	LOC340073	340073	56416	CGI-S-Shore	FALSE	TRUE	FALSE
cg20448089	chr5	71362316	71362317	MAP1B	4131	-40800	Non-CGI	FALSE	FALSE	TRUE
cg21113900	chr5	126409308	126409309	C5orf63	401207	-123	CGI	TRUE	FALSE	FALSE
cg21554217	chr5	138897467	138897468	TMEM173	340061	-35123	CGI	FALSE	FALSE	TRUE
cg22005336	chr5	63215684	63215685	HTR1A	3350	41860	Non-CGI	FALSE	FALSE	TRUE
cg22488849	chr5	3607134	3607135	IRX1	79192	10965	CGI-S-Shore	FALSE	FALSE	TRUE
cg23500537	chr5	140419819	140419820	PCDHB1	29930	-11158	CGI-N-Shore	FALSE	FALSE	TRUE
cg23941599	chr5	114880796	114880797	FEM1C	56929	-204	CGI	TRUE	FALSE	FALSE
cg24641276	chr5	170743715	170743716	TLX3	30012	7426	CGI	FALSE	FALSE	TRUE
cg24661016	chr5	1660205	1660206	LOC728613	728613	-26084	CGI-N-Shelf	FALSE	FALSE	TRUE
cg24797508	chr5	67583609	67583610	PIK3R1	5295	72024	CGI-N-Shore	TRUE	TRUE	FALSE
cg24853975	chr5	112666914	112666915	TSSK1B	83942	103812	Non-CGI	FALSE	TRUE	FALSE
cg24865210	chr5	158689727	158689728	UBLCP1	134510	-360	CGI-N-Shore	TRUE	FALSE	FALSE
cg25185454	chr5	135262082	135262083	FBXL21	26223	-3922	CGI-N-Shelf	FALSE	FALSE	TRUE
cg25226555	chr5	98714340	98714341	LOC100289230	100289230	449501	Non-CGI	FALSE	FALSE	TRUE
cg25970471	chr5	1059192	1059193	MIR4635	100616479	3895	CGI	FALSE	TRUE	FALSE
cg26006951	chr5	1295988	1295989	TERT	7015	-825	CGI	TRUE	FALSE	FALSE
cg26488999	chr5	141235690	141235691	PCDH1	5097	22252	CGI-S-Shore	FALSE	TRUE	FALSE
cg26545167	chr5	106606747	106606748	EFNA5	1946	399847	Non-CGI	FALSE	FALSE	TRUE
cg26969541	chr5	167712666	167712667	WWC1	23286	-6397	Non-CGI	FALSE	FALSE	TRUE
cg27081603	chr5	175788876	175788877	KIAA1191	57179	-66	CGI	TRUE	FALSE	FALSE
cg27152280	chr5	139423077	139423078	NRG2	9542	-192	CGI	TRUE	FALSE	FALSE
cg00043444	chr6	134384706	134384707	SLC2A12	154091	-10916	Non-CGI	FALSE	FALSE	TRUE
cg00486113	chr6	31105711	31105712	PSORS1C2	170680	1414	Non-CGI	FALSE	TRUE	FALSE
cg00551378	chr6	31711701	31711702	MSH5-SAPCD1	100532732	3975	CGI-S-Shelf	TRUE	TRUE	FALSE
cg00575744	chr6	32908642	32908643	HLA-DMB	3109	203	Non-CGI	TRUE	FALSE	FALSE
cg01359329	chr6	118240294	118240295	SLC35F1	222553	11604	CGI-N-Shore	FALSE	TRUE	FALSE
cg01614746	chr6	78360046	78360047	HTR1B	3351	-186925	CGI	FALSE	FALSE	TRUE
cg01722904	chr6	149888045	149888046	GINM1	116254	516	CGI	FALSE	TRUE	FALSE
cg01993468	chr6	170571763	170571764	LOC154449	154449	-105	CGI	TRUE	FALSE	FALSE
cg02075593	chr6	52773711	52773712	GSTA3	2940	783	Non-CGI	FALSE	TRUE	FALSE
cg02202664	chr6	155545253	155545254	CLDN20	49861	-39892	Non-CGI	FALSE	TRUE	FALSE
cg02369313	chr6	7590312	7590313	SNRNP48	154007	-118	CGI-N-Shore	TRUE	FALSE	FALSE
cg02666489	chr6	160680115	160680116	SLC22A2	6582	-151	CGI-S-Shore	TRUE	FALSE	FALSE
cg02888247	chr6	24719235	24719236	C6orf62	81688	166	CGI-N-Shore	TRUE	FALSE	FALSE
cg04206219	chr6	1602137	1602138	FOXC1	2296	-8542	CGI-S-Shore	FALSE	FALSE	TRUE
cg04636765	chr6	168766666	168766667	DACT2	168002	-46263	CGI	FALSE	FALSE	TRUE
cg04856285	chr6	167016706	167016707	MIR1913	100302141	-93784	Non-CGI	FALSE	TRUE	FALSE
cg04903623	chr6	137795451	137795452	OLIG3	167826	20078	Non-CGI	FALSE	FALSE	TRUE
cg05364473	chr6	44033980	44033981	MRPL14	64928	61209	Non-CGI	FALSE	TRUE	FALSE
cg05475010	chr6	41176577	41176578	TREML2	79865	-7651	Non-CGI	FALSE	TRUE	FALSE
cg05594872	chr6	28892418	28892419	TRIM27	5987	-649	CGI-S-Shore	TRUE	FALSE	FALSE
cg05667107	chr6	18280398	18280399	DEK	7913	-15598	CGI-S-Shelf	FALSE	FALSE	TRUE
cg05826214	chr6	151670725	151670726	ZBTB2	57621	41950	CGI	FALSE	TRUE	FALSE
cg05992235	chr6	43732881	43732882	VEGFA	7422	-5063	Non-CGI	FALSE	FALSE	TRUE
cg06003958	chr6	31023257	31023258	HCG22	285834	1272	Non-CGI	TRUE	TRUE	FALSE
cg06270776	chr6	160932670	160932671	LPAL2	80350	-513	Non-CGI	TRUE	FALSE	FALSE
cg06472688	chr6	131184706	131184707	SMLR1	100507203	36160	Non-CGI	FALSE	TRUE	FALSE
cg06981111	chr6	58180096	58180097	GUSBP4	375513	107626	CGI-N-Shore	FALSE	FALSE	TRUE
cg07237089	chr6	167280873	167280874	RPS6KA2	6196	-5101	CGI-N-Shelf	FALSE	FALSE	TRUE
cg07279933	chr6	127440413	127440414	RSPO3	84870	364	CGI-S-Shore	TRUE	TRUE	FALSE
cg07504780	chr6	32821684	32821685	TAP1	6890	62	CGI	TRUE	FALSE	FALSE
cg07857404	chr6	33378502	33378503	PHF1	5252	-269	CGI	TRUE	FALSE	FALSE
cg08306084	chr6	33248546	33248547	B3GALT4	8705	3628	CGI-S-Shelf	FALSE	TRUE	FALSE
cg08903780	chr6	100048755	100048756	PRDM13	59336	-5893	CGI-N-Shore	FALSE	FALSE	TRUE
cg08907436	chr6	152125965	152125966	ESR1	2099	114333	CGI-N-Shelf	TRUE	TRUE	FALSE
cg09106817	chr6	149637881	149637882	SUMO4	387082	-83612	CGI-N-Shore	TRUE	TRUE	FALSE
cg09120725	chr6	168971785	168971786	SMOC2	64094	129953	CGI	FALSE	TRUE	FALSE
cg09125623	chr6	168197983	168197984	C6orf123	26238	-443	CGI	TRUE	FALSE	FALSE
cg09332353	chr6	27215376	27215377	PRSS16	10279	-124	CGI-N-Shelf	TRUE	FALSE	FALSE
cg10086720	chr6	33169259	33169260	RXRB	6257	-628	CGI-S-Shore	TRUE	TRUE	FALSE
cg10134204	chr6	143834261	143834262	FUCA2	2519	-1240	CGI-S-Shore	TRUE	FALSE	FALSE
cg10308381	chr6	32062393	32062394	TNXB	7148	23076	CGI-N-Shore	FALSE	TRUE	FALSE
cg10592454	chr6	27215509	27215510	PRSS16	10279	6	CGI-N-Shelf	TRUE	FALSE	FALSE
cg11064935	chr6	34164525	34164526	HMGA1	3159	-40050	CGI-S-Shore	FALSE	FALSE	TRUE
cg11330329	chr6	30588647	30588648	MRPS18B	28973	3160	CGI-S-Shelf	FALSE	TRUE	FALSE
cg11969053	chr6	44121825	44121826	CAPN11	11131	-4721	CGI-S-Shelf	FALSE	TRUE	FALSE
cg12094903	chr6	32808689	32808690	TAP2	6891	-2141	CGI-S-Shelf	FALSE	TRUE	FALSE
cg12542670	chr6	150379047	150379048	ULBP3	79465	11234	CGI	FALSE	FALSE	TRUE
cg12681001	chr6	31543540	31543541	TNF	7124	189	Non-CGI	TRUE	FALSE	FALSE
cg14468284	chr6	170411953	170411954	LOC154449	154449	159702	CGI	FALSE	FALSE	TRUE
cg14571125	chr6	32796739	32796740	TAP2	6891	9806	Non-CGI	FALSE	TRUE	FALSE
cg14623715	chr6	136174534	136174535	PDE7B	27115	1699	Non-CGI	FALSE	TRUE	FALSE
cg15486740	chr6	24667460	24667461	ACOT13	55856	196	CGI	TRUE	FALSE	FALSE
cg15870741	chr6	127833557	127833558	SOGA3	387104	6941	CGI-N-Shelf	FALSE	TRUE	FALSE
cg16439130	chr6	149658548	149658549	SUMO4	387082	-62945	Non-CGI	FALSE	TRUE	FALSE
cg17000199	chr6	96464908	96464909	FUT9	10690	1062	CGI-S-Shore	FALSE	TRUE	FALSE
cg17879189	chr6	100054469	100054470	PRDM13	59336	-179	CGI-S-Shore	TRUE	FALSE	FALSE
cg18093751	chr6	108487183	108487184	NR2E1	7101	-30	CGI	TRUE	FALSE	FALSE
cg18189591	chr6	160388924	160388925	IGF2R	3482	-1205	CGI-N-Shore	TRUE	FALSE	FALSE
cg18458352	chr6	29711249	29711250	HLA-F-AS1	285830	5575	Non-CGI	FALSE	TRUE	FALSE
cg18714224	chr6	133564578	133564579	EYA4	2070	2841	CGI-S-Shore	FALSE	TRUE	FALSE
cg19074437	chr6	29396270	29396271	OR11A1	26531	-760	Non-CGI	TRUE	TRUE	FALSE
cg19590439	chr6	168661269	168661270	DACT2	168002	59131	CGI	FALSE	FALSE	TRUE
cg19752083	chr6	31597580	31597581	SNORA38	677820	6723	CGI-N-Shore	FALSE	TRUE	FALSE
cg19851715	chr6	26273145	26273146	HIST1H2BI	8346	-57	CGI	TRUE	FALSE	FALSE
cg20760057	chr6	130017522	130017523	TMEM244	253582	164892	Non-CGI	FALSE	TRUE	FALSE
cg20884697	chr6	96025221	96025222	MANEA	79694	-150	CGI-N-Shore	TRUE	FALSE	FALSE
cg20891443	chr6	83073237	83073238	TPBG	7162	313	CGI	TRUE	FALSE	FALSE
cg20938781	chr6	30069780	30069781	TRIM31	11074	11085	CGI	FALSE	FALSE	TRUE
cg21013323	chr6	32726567	32726568	HLA-DQB2	3120	4761	CGI-N-Shelf	FALSE	TRUE	FALSE
cg22478258	chr6	36237982	36237983	PNPLA1	285848	27036	Non-CGI	TRUE	TRUE	FALSE
cg22670819	chr6	31913759	31913760	MIR1236	100302242	10956	CGI-N-Shore	TRUE	TRUE	FALSE
cg24864413	chr6	160542732	160542733	SLC22A1	6580	-129	Non-CGI	TRUE	FALSE	FALSE
cg25067245	chr6	83448653	83448654	UBE3D	90025	326890	Non-CGI	FALSE	FALSE	TRUE
cg25189201	chr6	42698945	42698946	ATP6V0CP3	442211	3630	CGI-S-Shelf	FALSE	FALSE	TRUE
cg25917853	chr6	84568757	84568758	CYB5R4	51167	-611	CGI-N-Shore	TRUE	FALSE	FALSE
cg25997722	chr6	159158883	159158884	MIR3918	100500851	26900	Non-CGI	FALSE	TRUE	FALSE
cg26077005	chr6	27236793	27236794	PRSS16	10279	21290	CGI	FALSE	FALSE	TRUE
cg26226306	chr6	9711044	9711045	LOC100130275	100130275	-701505	Non-CGI	FALSE	TRUE	FALSE
cg26346796	chr6	32054867	32054868	TNXB	7148	30602	CGI-N-Shore	FALSE	TRUE	FALSE
cg26467536	chr6	32096686	32096687	ATF6B	1388	-668	CGI-S-Shore	TRUE	TRUE	FALSE
cg26842044	chr6	44209714	44209715	HSP90AB1	3326	-5133	CGI-S-Shelf	FALSE	FALSE	TRUE
cg26908825	chr6	1635818	1635819	FOXC1	2296	25136	CGI	FALSE	TRUE	FALSE
cg27123859	chr6	107230619	107230620	LOC100422737	100422737	4679	Non-CGI	FALSE	TRUE	FALSE
cg00185336	chr7	73153699	73153700	ABHD11	83451	-508	CGI-S-Shore	TRUE	FALSE	FALSE
cg00700487	chr7	150706128	150706129	ATG9B	285973	15456	CGI	FALSE	TRUE	FALSE
cg00772020	chr7	100808104	100808105	VGF	7425	746	CGI	TRUE	TRUE	FALSE
cg00930455	chr7	96654548	96654549	DLX5	1749	-404	CGI-S-Shore	TRUE	FALSE	FALSE
cg01412469	chr7	41732237	41732238	INHBA-AS1	285954	-1275	Non-CGI	TRUE	TRUE	FALSE
cg01807131	chr7	73856280	73856281	GTF2IRD1	9569	-11838	Non-CGI	FALSE	FALSE	TRUE
cg01921323	chr7	153881192	153881193	DPP6	1804	296772	Non-CGI	FALSE	TRUE	FALSE
cg02447471	chr7	95537015	95537016	DYNC1I1	1780	135196	Non-CGI	FALSE	TRUE	FALSE
cg02483701	chr7	27215610	27215611	HOXA10-HOXA9	100534589	4268	CGI	TRUE	TRUE	FALSE
cg03897241	chr7	1808115	1808116	ELFN1	392617	59316	CGI-N-Shore	FALSE	FALSE	TRUE
cg04711063	chr7	34118464	34118465	BMPER	168667	173940	CGI-N-Shore	FALSE	TRUE	FALSE
cg05135176	chr7	157620849	157620850	LOC100506585	100506585	-26426	CGI-S-Shore	FALSE	TRUE	FALSE
cg05145608	chr7	4757991	4757992	AP5Z1	9907	-57269	CGI	FALSE	TRUE	FALSE
cg06717068	chr7	111370856	111370857	IMMP2L	83943	-168282	CGI-S-Shore	FALSE	TRUE	FALSE
cg06754938	chr7	1049123	1049124	MIR339	442907	13537	CGI	FALSE	TRUE	FALSE
cg07210132	chr7	1021631	1021632	CYP2W1	54905	-1202	CGI-N-Shore	TRUE	FALSE	FALSE
cg07641535	chr7	55930753	55930754	2014-09-01	346288	-270	Non-CGI	TRUE	FALSE	FALSE
cg08528826	chr7	139168305	139168306	KLRG2	346689	150	CGI	TRUE	FALSE	FALSE
cg08626653	chr7	100082322	100082323	NYAP1	222950	771	CGI-S-Shore	FALSE	TRUE	FALSE
cg08702344	chr7	90031349	90031350	CLDN12	9069	18313	CGI-N-Shore	TRUE	TRUE	FALSE
cg09042009	chr7	157641737	157641738	LOC100506585	100506585	-5538	CGI-S-Shore	FALSE	TRUE	FALSE
cg09082192	chr7	770527	770528	PRKAR1B	5575	-3213	CGI-S-Shelf	FALSE	TRUE	FALSE
cg09118552	chr7	117067745	117067746	ASZ1	136991	-167	CGI	TRUE	FALSE	FALSE
cg10068437	chr7	18126994	18126995	HDAC9	9734	421	CGI	FALSE	TRUE	FALSE
cg10322560	chr7	157694745	157694746	LOC100506585	100506585	47467	CGI	FALSE	TRUE	FALSE
cg11025469	chr7	157795018	157795019	LOC100506585	100506585	147740	CGI	FALSE	TRUE	FALSE
cg11493553	chr7	156993697	156993698	UBE3C	9690	62041	Non-CGI	FALSE	TRUE	FALSE
cg11526630	chr7	4845567	4845568	MIR4656	100616465	-17296	CGI-S-Shore	TRUE	TRUE	FALSE
cg11969108	chr7	154582418	154582419	LOC100132707	100132707	-137807	CGI-N-Shelf	FALSE	TRUE	FALSE
cg12497581	chr7	2557152	2557153	LFNG	3955	4988	CGI-N-Shore	TRUE	TRUE	FALSE
cg13010326	chr7	36430238	36430239	KIAA0895	23366	-503	CGI-S-Shore	TRUE	TRUE	FALSE
cg13837997	chr7	156917109	156917110	UBE3C	9690	-14544	CGI-N-Shore	FALSE	FALSE	TRUE
cg14211598	chr7	155286861	155286862	EN2	2020	36036	CGI	FALSE	FALSE	TRUE
cg14215309	chr7	98099806	98099807	BAIAP2L1	55971	-69378	CGI-N-Shore	FALSE	FALSE	TRUE
cg14390189	chr7	801377	801378	PRKAR1B	5575	-34063	CGI-S-Shore	FALSE	TRUE	FALSE
cg14426836	chr7	139229165	139229166	CLEC2L	154790	20490	CGI-S-Shore	FALSE	TRUE	FALSE
cg14688342	chr7	55147074	55147075	EGFR	1956	60348	CGI	FALSE	TRUE	FALSE
cg14761242	chr7	158158014	158158015	MIR595	693180	167489	CGI	FALSE	TRUE	FALSE
cg14896906	chr7	107205105	107205106	COG5	10466	-145	CGI-S-Shore	TRUE	TRUE	FALSE
cg15055773	chr7	107647750	107647751	LAMB1	3912	-3945	CGI-S-Shelf	FALSE	FALSE	TRUE
cg15657785	chr7	155613360	155613361	SHH	6469	-8392	CGI	FALSE	FALSE	TRUE
cg15703365	chr7	5862996	5862997	ZNF815P	401303	204	CGI	TRUE	FALSE	FALSE
cg15970595	chr7	45299616	45299617	RAMP3	10268	102248	CGI-N-Shore	FALSE	FALSE	TRUE
cg16254309	chr7	145814152	145814153	CNTNAP2	26047	698	CGI	FALSE	TRUE	FALSE
cg16412148	chr7	56016941	56016942	MRPS17	51373	-2668	CGI-N-Shelf	FALSE	FALSE	TRUE
cg16558485	chr7	155757295	155757296	SHH	6469	-152327	Non-CGI	FALSE	FALSE	TRUE
cg19425969	chr7	157291474	157291475	MIR153-2	406945	75638	CGI	FALSE	FALSE	TRUE
cg20883137	chr7	23285097	23285098	GPNMB	10457	-1217	CGI-N-Shelf	TRUE	FALSE	FALSE
cg21748317	chr7	158073589	158073590	MIR595	693180	251914	CGI-S-Shore	FALSE	TRUE	FALSE
cg21756194	chr7	93205240	93205241	CALCR	799	-1197	CGI-S-Shore	TRUE	FALSE	FALSE
cg22530232	chr7	158110152	158110153	MIR595	693180	215351	CGI-S-Shore	FALSE	TRUE	FALSE
cg23436746	chr7	49815938	49815939	VWC2	375567	2680	CGI-S-Shore	FALSE	TRUE	FALSE
cg23492625	chr7	1407363	1407364	MICALL2	79778	91744	CGI	FALSE	FALSE	TRUE
cg23705098	chr7	1289853	1289854	UNCX	340260	17198	CGI-S-Shore	FALSE	FALSE	TRUE
cg24299177	chr7	123614340	123614341	SPAM1	6677	49053	Non-CGI	FALSE	FALSE	TRUE
cg24611709	chr7	96656358	96656359	DLX5	1749	-2214	CGI-S-Shore	FALSE	FALSE	TRUE
cg24616828	chr7	129414694	129414695	MIR96	407053	-84	CGI-N-Shelf	TRUE	FALSE	FALSE
cg24968176	chr7	98509723	98509724	MIR3609	100500819	30449	Non-CGI	FALSE	TRUE	FALSE
cg25395559	chr7	20371503	20371504	ITGB8	3696	1177	CGI	TRUE	TRUE	FALSE
cg25666995	chr7	37421924	37421925	ELMO1	9844	66969	Non-CGI	FALSE	TRUE	FALSE
cg26572927	chr7	55411738	55411739	LANCL2	55915	-21401	CGI	FALSE	FALSE	TRUE
cg26914299	chr7	122326807	122326808	RNF133	168433	12399	Non-CGI	FALSE	TRUE	FALSE
cg00319223	chr8	2012508	2012509	MYOM2	9172	19349	CGI-N-Shore	FALSE	TRUE	FALSE
cg00390735	chr8	143553436	143553437	BAI1	575	8058	CGI-S-Shelf	FALSE	TRUE	FALSE
cg00641679	chr8	94230311	94230312	C8orf87	389676	-51231	Non-CGI	FALSE	FALSE	TRUE
cg00956494	chr8	120884086	120884087	DEPTOR	64798	-1812	CGI-N-Shore	TRUE	FALSE	FALSE
cg01164202	chr8	71579983	71579984	LACTB2	51110	1462	CGI-N-Shore	TRUE	TRUE	FALSE
cg01926906	chr8	65499701	65499702	LOC401463	401463	-5255	CGI	FALSE	FALSE	TRUE
cg02624460	chr8	35091165	35091166	UNC5D	137970	-1808	CGI-N-Shore	TRUE	FALSE	FALSE
cg03140889	chr8	70555135	70555136	SULF1	23213	176275	Non-CGI	FALSE	TRUE	FALSE
cg03550384	chr8	91803357	91803358	TMEM64	169200	500	CGI-N-Shore	TRUE	TRUE	FALSE
cg04058134	chr8	99054741	99054742	SNORA72	26775	-295	CGI-N-Shelf	TRUE	TRUE	FALSE
cg04491321	chr8	142736998	142736999	MROH5	389690	-219667	CGI-N-Shore	FALSE	FALSE	TRUE
cg04679712	chr8	25898839	25898840	EBF2	64641	3799	CGI-S-Shore	FALSE	TRUE	FALSE
cg05460571	chr8	8630364	8630365	CLDN23	137075	70697	Non-CGI	FALSE	FALSE	TRUE
cg05570141	chr8	37556959	37556960	ZNF703	80139	3657	CGI-S-Shore	FALSE	FALSE	TRUE
cg05812814	chr8	145773078	145773079	C8orf82	414919	-18619	CGI	FALSE	TRUE	FALSE
cg06162872	chr8	25546737	25546738	CDCA2	157313	230223	Non-CGI	FALSE	TRUE	FALSE
cg06166767	chr8	41167848	41167849	SFRP1	6422	-857	CGI-S-Shore	TRUE	FALSE	FALSE
cg06818484	chr8	145051287	145051288	PLEC	5339	-373	CGI	TRUE	FALSE	FALSE
cg07028950	chr8	144302512	144302513	GPIHBP1	338328	7443	CGI-N-Shore	FALSE	FALSE	TRUE
cg07043604	chr8	48739256	48739257	CEBPD	1052	-88529	CGI-N-Shelf	FALSE	TRUE	FALSE
cg07307335	chr8	12602187	12602188	LONRF1	91694	10803	Non-CGI	TRUE	TRUE	FALSE
cg07531663	chr8	47751494	47751495	LINC00293	497634	-1012	Non-CGI	TRUE	FALSE	FALSE
cg11413576	chr8	59650783	59650784	NSMAF	8439	-78378	Non-CGI	FALSE	FALSE	TRUE
cg11608005	chr8	103714592	103714593	KLF10	7071	-46608	Non-CGI	FALSE	FALSE	TRUE
cg11899596	chr8	145663791	145663792	TONSL	4796	6019	CGI-S-Shore	FALSE	TRUE	FALSE
cg13092523	chr8	72757004	72757005	MSC	9242	-272	CGI	TRUE	TRUE	FALSE
cg13272412	chr8	32503511	32503512	FUT10	84750	827151	CGI-N-Shore	TRUE	TRUE	FALSE
cg13615027	chr8	100825020	100825021	COX6C	1345	81220	Non-CGI	FALSE	TRUE	FALSE
cg14943774	chr8	145774189	145774190	C8orf82	414919	-19730	CGI	FALSE	TRUE	FALSE
cg16580982	chr8	2480426	2480427	MYOM2	9172	487267	CGI-N-Shore	TRUE	FALSE	FALSE
cg17189568	chr8	53477264	53477265	FAM150A	389658	755	CGI	FALSE	TRUE	FALSE
cg17511604	chr8	123928472	123928473	DERL1	79139	126174	Non-CGI	FALSE	TRUE	FALSE
cg19151858	chr8	6940624	6940625	DEFA5	1670	-26364	Non-CGI	FALSE	FALSE	TRUE
cg21887430	chr8	27695858	27695859	PBK	55872	-285	CGI-S-Shore	TRUE	FALSE	FALSE
cg22838079	chr8	21759671	21759672	DOK2	9046	11532	Non-CGI	FALSE	TRUE	FALSE
cg23075260	chr8	145617435	145617436	MIR939	100126351	2008	CGI	FALSE	TRUE	FALSE
cg23177714	chr8	142877740	142877741	MROH5	389690	-360409	Non-CGI	FALSE	FALSE	TRUE
cg25664752	chr8	1317118	1317119	LOC286083	286083	-66290	CGI-N-Shelf	FALSE	FALSE	TRUE
cg25877069	chr8	95003236	95003237	PDP1	54704	74152	CGI-N-Shore	FALSE	FALSE	TRUE
cg26020513	chr8	11568356	11568357	GATA4	2626	33887	CGI-S-Shore	FALSE	TRUE	FALSE
cg26350286	chr8	95652691	95652692	ESRP1	54845	-671	CGI	TRUE	FALSE	FALSE
cg26730369	chr8	26724001	26724002	ADRA1A	148	-1078	CGI	TRUE	TRUE	FALSE
cg26961166	chr8	73687160	73687161	TERF1	7013	-233935	Non-CGI	FALSE	TRUE	FALSE
cg00505502	chr9	133028557	133028558	NCS1	23413	93699	CGI	FALSE	FALSE	TRUE
cg00665420	chr9	133537030	133537031	PRDM12	59335	-2949	CGI	FALSE	FALSE	TRUE
cg03191962	chr9	135753193	135753194	C9orf9	11092	-555	CGI-N-Shore	TRUE	TRUE	FALSE
cg03492094	chr9	91994786	91994787	SECISBP2	79048	61373	CGI-S-Shore	FALSE	TRUE	FALSE
cg04837071	chr9	140318649	140318650	NOXA1	10811	801	CGI	TRUE	TRUE	FALSE
cg05115664	chr9	90621637	90621638	CDK20	23552	-31941	CGI	FALSE	FALSE	TRUE
cg07753203	chr9	127539056	127539057	OLFML2A	169611	-379	CGI-N-Shore	TRUE	FALSE	FALSE
cg10228162	chr9	133589493	133589494	ABL1	25	224	CGI-S-Shore	TRUE	FALSE	FALSE
cg13642249	chr9	33321742	33321743	NFX1	4799	31323	Non-CGI	FALSE	TRUE	FALSE
cg13839781	chr9	133531230	133531231	PRDM12	59335	-8749	CGI-S-Shelf	FALSE	FALSE	TRUE
cg14031679	chr9	139466195	139466196	MIR4674	100616301	-25483	CGI-N-Shore	FALSE	FALSE	TRUE
cg14261395	chr9	135134239	135134240	SETX	23064	96131	Non-CGI	FALSE	FALSE	TRUE
cg14462321	chr9	137232372	137232373	RXRA	6256	23427	CGI-S-Shelf	FALSE	TRUE	FALSE
cg14572845	chr9	117068361	117068362	ORM1	5004	-16940	Non-CGI	TRUE	TRUE	FALSE
cg14624329	chr9	122295765	122295766	DBC1	1620	-164025	Non-CGI	FALSE	FALSE	TRUE
cg14766769	chr9	125874000	125874001	MIR600HG	81571	3754	CGI-N-Shore	TRUE	FALSE	FALSE
cg17354303	chr9	96716665	96716666	BARX1	56033	941	CGI	TRUE	TRUE	FALSE
cg20422318	chr9	134955070	134955071	MED27	9442	202	CGI	TRUE	FALSE	FALSE
cg21236655	chr9	117861043	117861044	TNC	3371	19491	Non-CGI	FALSE	TRUE	FALSE
cg00181834	chr10	23463015	23463016	PTF1A	256297	-18443	CGI	FALSE	FALSE	TRUE
cg00242839	chr10	6130578	6130579	RBM17	84991	-369	CGI	TRUE	FALSE	FALSE
cg01839993	chr10	74034644	74034645	DDIT4	54541	966	CGI	TRUE	TRUE	FALSE
cg02300379	chr10	95536738	95536739	LGI1	9211	19171	Non-CGI	FALSE	TRUE	FALSE
cg02700106	chr10	671406	671407	PRR26	414235	-24480	CGI-S-Shore	FALSE	TRUE	FALSE
cg02772663	chr10	121172898	121172899	MIR4681	100616398	35413	CGI-S-Shore	FALSE	TRUE	FALSE
cg03413393	chr10	81043015	81043016	PPIF	10105	-64203	CGI-S-Shelf	FALSE	TRUE	FALSE
cg03528287	chr10	91738461	91738462	LOC643529	643529	149210	CGI-N-Shore	FALSE	FALSE	TRUE
cg03872339	chr10	133948517	133948518	JAKMIP3	282973	30203	CGI	FALSE	TRUE	FALSE
cg04074010	chr10	130227803	130227804	MKI67	4288	-303334	CGI	FALSE	FALSE	TRUE
cg04907738	chr10	13425688	13425689	SEPHS1	22929	-35389	CGI	FALSE	FALSE	TRUE
cg05723130	chr10	124248994	124248995	HTRA1	5654	27952	CGI	FALSE	TRUE	FALSE
cg06422309	chr10	1352781	1352782	LINC00200	399706	147072	Non-CGI	FALSE	TRUE	FALSE
cg06777902	chr10	127622996	127622997	FANK1	92565	37887	Non-CGI	FALSE	TRUE	FALSE
cg06860721	chr10	51564909	51564910	NCOA4	8031	-197	CGI-N-Shore	TRUE	TRUE	FALSE
cg07330171	chr10	90034398	90034399	RNLS	55328	308682	Non-CGI	FALSE	TRUE	FALSE
cg07381930	chr10	99608915	99608916	GOLGA7B	401647	-1078	CGI-N-Shore	TRUE	FALSE	FALSE
cg09153282	chr10	54216003	54216004	DKK1	22943	141961	Non-CGI	TRUE	FALSE	FALSE
cg09562683	chr10	105210440	105210441	CALHM2	51063	2216	CGI-N-Shore	TRUE	TRUE	FALSE
cg09619146	chr10	125651034	125651035	CPXM2	119587	48743	CGI	TRUE	TRUE	FALSE
cg10605977	chr10	133961265	133961266	DPYSL4	10570	-39147	CGI-N-Shore	FALSE	TRUE	FALSE
cg10650018	chr10	92616759	92616760	HTR7	3363	910	CGI-N-Shore	FALSE	TRUE	FALSE
cg11007110	chr10	134796269	134796270	NA	255352	-40179	CGI	FALSE	FALSE	TRUE
cg11880367	chr10	80141181	80141182	LINC00856	100132987	132798	CGI	FALSE	TRUE	FALSE
cg13365591	chr10	133930663	133930664	JAKMIP3	282973	12349	CGI	FALSE	TRUE	FALSE
cg13696436	chr10	131695094	131695095	MIR4297	100422873	-53455	CGI-S-Shore	FALSE	TRUE	FALSE
cg14137286	chr10	31288997	31288998	ZNF438	220929	31867	Non-CGI	TRUE	TRUE	FALSE
cg14195249	chr10	13571710	13571711	BEND7	222389	-26733	CGI	FALSE	FALSE	TRUE
cg15995714	chr10	134222445	134222446	PWWP2B	170394	11742	CGI-S-Shore	FALSE	TRUE	FALSE
cg16330755	chr10	104613787	104613788	C10orf32-AS3MT	100528007	-178	CGI-N-Shore	TRUE	FALSE	FALSE
cg17379932	chr10	12085598	12085599	UPF2	26019	-428	CGI	TRUE	FALSE	FALSE
cg19205023	chr10	134001455	134001456	DPYSL4	10570	1040	CGI	FALSE	TRUE	FALSE
cg19346992	chr10	70939271	70939272	SUPV3L1	6832	-720	CGI-N-Shore	TRUE	FALSE	FALSE
cg19498112	chr10	2951187	2951188	PFKP	5214	-158523	CGI	FALSE	FALSE	TRUE
cg20598295	chr10	35099208	35099209	PARD3	56288	5043	CGI-N-Shelf	FALSE	TRUE	FALSE
cg23245905	chr10	99735133	99735134	CRTAC1	55118	55450	CGI	FALSE	TRUE	FALSE
cg23504719	chr10	99735010	99735011	CRTAC1	55118	55573	CGI-S-Shore	FALSE	TRUE	FALSE
cg23908771	chr10	134645960	134645961	NKX6-2	84504	-46422	CGI-N-Shore	FALSE	TRUE	FALSE
cg23967442	chr10	134570057	134570058	NKX6-2	84504	29478	CGI	FALSE	TRUE	FALSE
cg24361761	chr10	25782377	25782378	GPR158-AS1	100128811	-317171	Non-CGI	FALSE	TRUE	FALSE
cg24489074	chr10	130230054	130230055	MKI67	4288	-305585	CGI	FALSE	FALSE	TRUE
cg24590430	chr10	99097076	99097077	FRAT2	23401	-2617	CGI-S-Shelf	FALSE	FALSE	TRUE
cg24855781	chr10	68688167	68688168	LRRTM3	347731	2374	CGI-S-Shore	FALSE	TRUE	FALSE
cg25153759	chr10	135051022	135051023	VENTX	27287	-384	CGI	TRUE	FALSE	FALSE
cg25277632	chr10	14995476	14995477	MEIG1	644890	-5960	CGI	FALSE	TRUE	FALSE
cg26182964	chr10	135186011	135186012	MIR3944	100500911	-843	CGI-N-Shore	TRUE	TRUE	FALSE
cg26282761	chr10	128193219	128193220	ADAM12	8038	-116091	CGI	TRUE	TRUE	FALSE
cg27253469	chr10	134970614	134970615	KNDC1	85442	-3355	CGI	FALSE	FALSE	TRUE
cg01187997	chr11	1594830	1594831	LOC338651	338651	858	CGI-S-Shore	TRUE	TRUE	FALSE
cg01421380	chr11	62446817	62446818	UBXN1	51035	-271	CGI-S-Shore	TRUE	FALSE	FALSE
cg01596495	chr11	57317706	57317707	SMTNL1	219537	7591	Non-CGI	FALSE	TRUE	FALSE
cg01807735	chr11	115861018	115861019	LOC283143	283143	-229672	Non-CGI	FALSE	FALSE	TRUE
cg02211519	chr11	2407267	2407268	CD81	975	8719	CGI-S-Shore	FALSE	TRUE	FALSE
cg02372056	chr11	64684731	64684732	ATG2A	23130	-8	CGI	TRUE	FALSE	FALSE
cg02646528	chr11	56949288	56949289	LRRC55	219527	66	CGI-S-Shore	TRUE	FALSE	FALSE
cg02771202	chr11	119210291	119210292	RNF26	79102	5080	CGI-N-Shore	FALSE	TRUE	FALSE
cg02978150	chr11	125702592	125702593	PATE4	399968	-617	Non-CGI	TRUE	FALSE	FALSE
cg03101763	chr11	65319844	65319845	LTBP3	4054	6407	CGI-N-Shore	TRUE	TRUE	FALSE
cg03445474	chr11	34073002	34073003	CAPRIN1	4076	-226	CGI	TRUE	FALSE	FALSE
cg04448240	chr11	28831268	28831269	METTL15	196074	701469	Non-CGI	FALSE	FALSE	TRUE
cg05452742	chr11	34070756	34070757	CAPRIN1	4076	-2472	CGI-N-Shelf	FALSE	FALSE	TRUE
cg06158994	chr11	133801225	133801226	IGSF9B	22997	25653	CGI-S-Shore	FALSE	TRUE	FALSE
cg06727490	chr11	69631981	69631982	FGF3	2248	2209	CGI	FALSE	TRUE	FALSE
cg08470031	chr11	2423043	2423044	TSSC4	10078	1324	CGI-S-Shore	TRUE	TRUE	FALSE
cg09055519	chr11	1918755	1918756	TNNT3	7140	-22042	CGI	FALSE	FALSE	TRUE
cg09452027	chr11	45825483	45825484	SLC35C1	55343	-138	CGI-N-Shore	TRUE	FALSE	FALSE
cg09696301	chr11	20619598	20619599	SLC6A5	9152	-1346	CGI-S-Shore	TRUE	FALSE	FALSE
cg09847753	chr11	73588532	73588533	PAAF1	80227	498	CGI-S-Shore	TRUE	TRUE	FALSE
cg10133100	chr11	68276883	68276884	PPP6R3	55291	48696	Non-CGI	FALSE	TRUE	FALSE
cg10503232	chr11	2891495	2891496	KCNQ1DN	55539	231	CGI-S-Shore	TRUE	FALSE	FALSE
cg10596956	chr11	4566380	4566381	OR52M1	119772	-39	Non-CGI	TRUE	FALSE	FALSE
cg10790526	chr11	134250892	134250893	B3GAT1	27087	30918	CGI-N-Shore	FALSE	TRUE	FALSE
cg11029053	chr11	8008725	8008726	EIF3F	8665	279	CGI	TRUE	FALSE	FALSE
cg11435872	chr11	45827475	45827476	SLC35C1	55343	1851	CGI-S-Shore	TRUE	TRUE	FALSE
cg11740872	chr11	66475238	66475239	SPTBN2	6712	13630	CGI	FALSE	TRUE	FALSE
cg12103742	chr11	64739852	64739853	C11orf85	283129	-294	CGI-S-Shore	TRUE	FALSE	FALSE
cg12575928	chr11	22687660	22687661	GAS2	2620	-498	CGI-N-Shore	TRUE	FALSE	FALSE
cg12577455	chr11	125303250	125303251	FEZ1	9638	62954	Non-CGI	FALSE	TRUE	FALSE
cg12750151	chr11	55586264	55586265	OR5D18	219438	-840	Non-CGI	TRUE	FALSE	FALSE
cg12798775	chr11	26350473	26350474	ANO3	63982	139643	CGI-N-Shelf	FALSE	TRUE	FALSE
cg12911952	chr11	2924523	2924524	SLC22A18AS	5003	650	CGI-S-Shore	TRUE	TRUE	FALSE
cg13015284	chr11	64410392	64410393	SLC22A12	116085	52109	CGI	TRUE	TRUE	FALSE
cg13153466	chr11	123008499	123008500	CLMP	79827	57506	Non-CGI	FALSE	TRUE	FALSE
cg13671841	chr11	30037031	30037032	KCNA4	3739	1544	CGI-N-Shore	FALSE	TRUE	FALSE
cg13733266	chr11	85397216	85397217	CCDC89	220388	102	CGI-S-Shelf	TRUE	FALSE	FALSE
cg13738793	chr11	6337206	6337207	PRKCDBP	112464	4532	CGI-N-Shelf	FALSE	FALSE	TRUE
cg13875901	chr11	61879966	61879967	INCENP	3619	-11477	CGI	FALSE	FALSE	TRUE
cg14921271	chr11	43698547	43698548	HSD17B12	51144	-3594	CGI-N-Shelf	FALSE	FALSE	TRUE
cg15240320	chr11	56141839	56141840	OR8U8	504189	-1259	Non-CGI	TRUE	FALSE	FALSE
cg15717764	chr11	132641831	132641832	OPCML	4978	760570	Non-CGI	FALSE	TRUE	FALSE
cg16180353	chr11	31819219	31819220	DKFZp686K1684	440034	-18893	CGI	FALSE	TRUE	FALSE
cg16235809	chr11	126839681	126839682	MIR3167	100422918	18755	Non-CGI	FALSE	TRUE	FALSE
cg16235962	chr11	118754507	118754508	CXCR5	643	31	Non-CGI	TRUE	FALSE	FALSE
cg16668931	chr11	50220343	50220344	LOC441601	441601	37288	CGI-S-Shore	FALSE	FALSE	TRUE
cg17146110	chr11	67751163	67751164	UNC93B1	81622	20428	CGI	FALSE	FALSE	TRUE
cg17436370	chr11	120008607	120008608	TRIM29	23650	254	CGI	TRUE	FALSE	FALSE
cg18463802	chr11	31844253	31844254	PAX6	5080	-4743	CGI-N-Shore	FALSE	TRUE	FALSE
cg18536644	chr11	2423045	2423046	TSSC4	10078	1326	CGI-S-Shore	TRUE	TRUE	FALSE
cg19255465	chr11	69830509	69830510	ANO1	55107	-93897	CGI	FALSE	FALSE	TRUE
cg19312291	chr11	61296641	61296642	LRRC10B	390205	20368	Non-CGI	FALSE	TRUE	FALSE
cg21074656	chr11	134284116	134284117	LOC283177	283177	1915	CGI-S-Shore	FALSE	TRUE	FALSE
cg22858288	chr11	2930322	2930323	SLC22A18AS	5003	-5146	CGI	FALSE	TRUE	FALSE
cg23181580	chr11	22454301	22454302	SLC17A6	57084	94633	CGI	FALSE	FALSE	TRUE
cg23852646	chr11	73638552	73638553	DNAJB13	374407	-22810	Non-CGI	FALSE	TRUE	FALSE
cg24005743	chr11	32112810	32112811	PAX6	5080	-273300	CGI	TRUE	TRUE	FALSE
cg24277007	chr11	78509647	78509648	NARS2	79731	-223737	Non-CGI	FALSE	TRUE	FALSE
cg24439505	chr11	2172098	2172099	IGF2	3481	-1264	Non-CGI	TRUE	TRUE	FALSE
cg25194612	chr11	134582315	134582316	LOC283177	283177	300114	CGI	FALSE	FALSE	TRUE
cg25500727	chr11	66059129	66059130	TMEM151A	256472	-242	CGI-S-Shore	TRUE	FALSE	FALSE
cg25918833	chr11	4718962	4718963	OR51E2	81285	112	Non-CGI	TRUE	FALSE	FALSE
cg27627854	chr11	108158382	108158383	ATM	472	64822	Non-CGI	TRUE	TRUE	FALSE
cg00666903	chr12	2861589	2861590	LOC283440	283440	19244	CGI-N-Shore	FALSE	FALSE	TRUE
cg00807197	chr12	128822865	128822866	MIR3612	100500817	44227	Non-CGI	FALSE	TRUE	FALSE
cg01190692	chr12	106976711	106976712	RFX4	5992	25	CGI	TRUE	TRUE	FALSE
cg01524853	chr12	54447807	54447808	FLJ12825	440101	-4229	CGI-N-Shore	TRUE	TRUE	FALSE
cg01574823	chr12	15700393	15700394	PTPRO	5800	225201	Non-CGI	FALSE	TRUE	FALSE
cg02470959	chr12	132196036	132196037	SFSWAP	6433	400	CGI	TRUE	TRUE	FALSE
cg02531227	chr12	129460621	129460622	GLT1D1	144423	122539	CGI	FALSE	TRUE	FALSE
cg02556042	chr12	117471086	117471087	TESC	54997	66163	CGI	FALSE	FALSE	TRUE
cg02765179	chr12	74687404	74687405	LOC100507377	100507377	-992	CGI-S-Shore	TRUE	FALSE	FALSE
cg02962597	chr12	117799749	117799750	NOS1	4842	-141	CGI-S-Shore	TRUE	FALSE	FALSE
cg02968094	chr12	4829617	4829618	GALNT8	26290	-133	Non-CGI	TRUE	FALSE	FALSE
cg03001012	chr12	4829636	4829637	GALNT8	26290	-114	Non-CGI	TRUE	FALSE	FALSE
cg04028167	chr12	76107548	76107549	KRR1	11103	-202129	Non-CGI	FALSE	FALSE	TRUE
cg04254916	chr12	52914047	52914048	KRT5	3852	194	Non-CGI	TRUE	FALSE	FALSE
cg04325312	chr12	126346509	126346510	LOC400084	400084	121409	CGI-S-Shore	FALSE	FALSE	TRUE
cg04594233	chr12	132917312	132917313	GALNT9	50614	-11406	CGI	FALSE	FALSE	TRUE
cg04672622	chr12	114724257	114724258	TBX5-AS1	255480	-121741	Non-CGI	FALSE	FALSE	TRUE
cg05249199	chr12	51477551	51477552	CSRNP2	81566	-96	CGI	TRUE	FALSE	FALSE
cg05451210	chr12	98812695	98812696	SLC9A7P1	121456	38226	Non-CGI	FALSE	FALSE	TRUE
cg05824594	chr12	2734503	2734504	LOC283440	283440	146330	CGI	FALSE	TRUE	FALSE
cg06024135	chr12	27863332	27863333	MRPS35	60488	-372	CGI-N-Shore	TRUE	FALSE	FALSE
cg06207728	chr12	133055123	133055124	FBRSL1	57666	-12032	CGI-S-Shore	FALSE	FALSE	TRUE
cg06522206	chr12	117651299	117651300	FBXO21	23014	-22998	Non-CGI	FALSE	TRUE	FALSE
cg06630413	chr12	54366875	54366876	HOXC11	3227	-33	CGI	TRUE	FALSE	FALSE
cg08693745	chr12	132286231	132286232	MMP17	4326	-26708	CGI	FALSE	FALSE	TRUE
cg09126273	chr12	15475767	15475768	PTPRO	5800	575	CGI	FALSE	TRUE	FALSE
cg09261514	chr12	133302012	133302013	ANKLE2	23141	36437	CGI	FALSE	FALSE	TRUE
cg09571762	chr12	39539558	39539559	CPNE8	144402	-240137	CGI-S-Shore	FALSE	FALSE	TRUE
cg09644157	chr12	124896212	124896213	FAM101A	144347	122501	CGI	FALSE	TRUE	FALSE
cg10216820	chr12	72332539	72332540	TPH2	121278	-85	Non-CGI	TRUE	FALSE	FALSE
cg10472288	chr12	75697264	75697265	GLIPR1L1	256710	-31197	CGI-N-Shelf	FALSE	TRUE	FALSE
cg11891239	chr12	28126534	28126535	PTHLH	5744	-1617	CGI-N-Shore	TRUE	FALSE	FALSE
cg12124911	chr12	45459085	45459086	RACGAP1P	83956	107	Non-CGI	TRUE	FALSE	FALSE
cg12504696	chr12	119776178	119776179	CCDC60	160777	3660	CGI-S-Shelf	FALSE	TRUE	FALSE
cg12591791	chr12	132970228	132970229	GALNT9	50614	-64322	CGI	FALSE	FALSE	TRUE
cg13726459	chr12	54409657	54409658	HOXC4	3221	-983	CGI-S-Shore	TRUE	FALSE	FALSE
cg13880113	chr12	98178057	98178058	MIR4303	100422924	211167	Non-CGI	FALSE	FALSE	TRUE
cg14126466	chr12	114830063	114830064	TBX5-AS1	255480	-15935	CGI-N-Shelf	FALSE	TRUE	FALSE
cg14258853	chr12	29935411	29935412	TMTC1	83857	2279	CGI-N-Shore	FALSE	TRUE	FALSE
cg14375747	chr12	1675969	1675970	WNT5B	81029	-7852	Non-CGI	FALSE	TRUE	FALSE
cg14783993	chr12	87106229	87106230	MGAT4C	25834	126450	Non-CGI	FALSE	TRUE	FALSE
cg16438602	chr12	53721673	53721674	AAAS	8086	-6260	CGI-S-Shore	FALSE	TRUE	FALSE
cg16493042	chr12	76264753	76264754	PHLDA1	22822	160801	Non-CGI	FALSE	FALSE	TRUE
cg16788865	chr12	46778801	46778802	SLC38A2	54407	-12155	CGI-S-Shore	FALSE	FALSE	TRUE
cg17154975	chr12	131513361	131513362	GPR133	283383	74908	CGI	TRUE	TRUE	FALSE
cg17417591	chr12	110485937	110485938	C12orf76	400073	25500	CGI-N-Shore	FALSE	TRUE	FALSE
cg18874332	chr12	100867529	100867530	NR1H4	9971	-20	Non-CGI	TRUE	FALSE	FALSE
cg21151061	chr12	50498016	50498017	GPD1	2819	214	Non-CGI	FALSE	TRUE	FALSE
cg21252355	chr12	132677820	132677821	NOC4L	79050	48826	CGI	FALSE	FALSE	TRUE
cg21590238	chr12	121454837	121454838	C12orf43	64897	-536	CGI-S-Shore	TRUE	FALSE	FALSE
cg21793437	chr12	2734591	2734592	LOC283440	283440	146242	CGI	FALSE	TRUE	FALSE
cg21922731	chr12	57157130	57157131	HSD17B6	8630	21	Non-CGI	TRUE	FALSE	FALSE
cg22141781	chr12	95397704	95397705	NDUFA12	55967	-192	CGI-S-Shore	TRUE	FALSE	FALSE
cg24849956	chr12	103216501	103216502	LINC00485	283432	1674	CGI-N-Shore	FALSE	TRUE	FALSE
cg24890884	chr12	7002827	7002828	DSTNP2	171220	8980	CGI-S-Shelf	FALSE	FALSE	TRUE
cg25003366	chr12	105886921	105886922	C12orf75	387882	162506	Non-CGI	FALSE	FALSE	TRUE
cg25030514	chr12	3392726	3392727	PRMT8	56341	-97787	CGI-N-Shore	FALSE	TRUE	FALSE
cg26480228	chr12	48921775	48921776	OR8S1	341568	2359	CGI-N-Shore	FALSE	TRUE	FALSE
cg27288127	chr12	111128029	111128030	HVCN1	84329	-411	CGI-S-Shore	TRUE	FALSE	FALSE
cg27570738	chr12	132675017	132675018	NOC4L	79050	46023	CGI	FALSE	FALSE	TRUE
cg03313945	chr13	100622158	100622159	ZIC5	85416	2018	CGI	FALSE	TRUE	FALSE
cg03338754	chr13	113765397	113765398	F7	2155	5291	CGI	FALSE	TRUE	FALSE
cg03918221	chr13	114322874	114322875	GRK1	6011	1276	CGI	FALSE	TRUE	FALSE
cg05383490	chr13	108518955	108518956	FAM155A	728215	503	CGI	TRUE	FALSE	FALSE
cg05965387	chr13	51418053	51418054	DLEU7	220107	-167	CGI	TRUE	TRUE	FALSE
cg06826155	chr13	107180025	107180026	EFNB2	1948	7361	Non-CGI	FALSE	TRUE	FALSE
cg09156155	chr13	27102776	27102777	WASF3	10810	-29062	Non-CGI	FALSE	FALSE	TRUE
cg12504148	chr13	43597331	43597332	DNAJC15	29103	-29	CGI-N-Shore	TRUE	FALSE	FALSE
cg14238891	chr13	112064021	112064022	TEX29	121793	91005	CGI-S-Shore	FALSE	FALSE	TRUE
cg14373611	chr13	20798734	20798735	GJB6	10804	7798	CGI-S-Shore	TRUE	TRUE	FALSE
cg15894389	chr13	47470857	47470858	HTR2A	3356	310	CGI-S-Shelf	TRUE	FALSE	FALSE
cg16136079	chr13	113811690	113811691	PROZ	8858	-1276	CGI-S-Shelf	TRUE	FALSE	FALSE
cg16551520	chr13	112610015	112610016	SOX1	6656	-111896	CGI	FALSE	FALSE	TRUE
cg20731581	chr13	99405269	99405270	SLC15A1	6564	-339	CGI-S-Shore	TRUE	FALSE	FALSE
cg20916262	chr13	44545539	44545540	LINC00284	121838	-50930	CGI-S-Shore	FALSE	FALSE	TRUE
cg21878148	chr13	70681276	70681277	ATXN8OS	6315	-67	CGI-N-Shore	TRUE	TRUE	FALSE
cg22088594	chr13	37634133	37634134	SUPT20H	55578	-282	CGI-S-Shore	TRUE	FALSE	FALSE
cg23758687	chr13	112996049	112996050	SPACA7	122258	-34600	CGI-N-Shore	FALSE	FALSE	TRUE
cg24401870	chr13	70682525	70682526	KLHL1	57626	98	CGI-S-Shore	TRUE	TRUE	FALSE
cg26096845	chr13	114926584	114926585	RASA3	22821	-28488	CGI-N-Shore	FALSE	FALSE	TRUE
cg26264944	chr13	114837807	114837808	RASA3	22821	60286	CGI-S-Shore	FALSE	TRUE	FALSE
cg00499277	chr14	23877516	23877517	MYH6	4624	-29	Non-CGI	TRUE	FALSE	FALSE
cg00762185	chr14	102028737	102028738	DIO3	1735	1048	CGI	TRUE	FALSE	FALSE
cg00947478	chr14	106410628	106410629	ADAM6	8755	27728	CGI-S-Shore	FALSE	TRUE	FALSE
cg01238343	chr14	23938207	23938208	NGDN	25983	-689	CGI	TRUE	FALSE	FALSE
cg01534391	chr14	100118672	100118673	HHIPL1	84439	7191	CGI	FALSE	TRUE	FALSE
cg01702210	chr14	58064926	58064927	C14orf105	55195	-104349	Non-CGI	TRUE	TRUE	FALSE
cg01726287	chr14	93812936	93812937	COX8C	341947	-599	CGI-N-Shore	TRUE	TRUE	FALSE
cg02132667	chr14	80957817	80957818	DIO2	1734	-260419	Non-CGI	FALSE	TRUE	FALSE
cg02139485	chr14	93215447	93215448	LGMN	5641	-399	CGI-S-Shore	TRUE	FALSE	FALSE
cg02256384	chr14	95538245	95538246	MIR3173	100422981	66076	Non-CGI	FALSE	FALSE	TRUE
cg02300390	chr14	88788343	88788344	KCNK10	54207	4911	CGI	FALSE	TRUE	FALSE
cg04899753	chr14	100843331	100843332	WDR25	79446	575	CGI-S-Shore	TRUE	TRUE	FALSE
cg07540634	chr14	67878142	67878143	PLEK2	26499	684	CGI-N-Shore	FALSE	TRUE	FALSE
cg08426384	chr14	78266734	78266735	ADCK1	57143	307	CGI-S-Shore	FALSE	TRUE	FALSE
cg10782206	chr14	76445988	76445989	TGFB3	7043	2102	CGI-N-Shelf	FALSE	TRUE	FALSE
cg11636151	chr14	100141862	100141863	CYP46A1	10858	-8891	CGI	FALSE	TRUE	FALSE
cg12123733	chr14	102025815	102025816	MIR1247	100302145	942	CGI-N-Shore	TRUE	TRUE	FALSE
cg13515998	chr14	71581031	71581032	PCNX	22990	206908	Non-CGI	FALSE	TRUE	FALSE
cg14145896	chr14	84294194	84294195	FLRT2	23768	-1702292	Non-CGI	FALSE	FALSE	TRUE
cg16113347	chr14	93899367	93899368	COX8C	341947	85829	CGI-S-Shore	FALSE	TRUE	FALSE
cg18924816	chr14	103388762	103388763	AMN	81693	-229	CGI-N-Shore	TRUE	FALSE	FALSE
cg19768079	chr14	78639736	78639737	NRXN3	9369	2807	CGI-S-Shore	FALSE	TRUE	FALSE
cg19909117	chr14	96219318	96219319	TCL1A	8115	-38784	Non-CGI	FALSE	TRUE	FALSE
cg21735344	chr14	102553260	102553261	HSP90AA1	3320	52824	CGI	TRUE	TRUE	FALSE
cg22816294	chr14	22458634	22458635	OR4E2	26686	325336	Non-CGI	TRUE	TRUE	FALSE
cg23280155	chr14	72219812	72219813	RGS6	9628	-179003	CGI	FALSE	FALSE	TRUE
cg23420779	chr14	23530483	23530484	CDH24	64403	-3735	CGI-S-Shore	FALSE	TRUE	FALSE
cg25017342	chr14	73425908	73425909	DCAF4	26094	32867	Non-CGI	FALSE	TRUE	FALSE
cg26030063	chr14	42078342	42078343	LRFN5	145581	1577	CGI-S-Shore	FALSE	TRUE	FALSE
cg26183870	chr14	100142298	100142299	CYP46A1	10858	-8455	CGI-S-Shore	FALSE	TRUE	FALSE
cg00027650	chr15	57510575	57510576	LOC283663	283663	-81986	Non-CGI	TRUE	TRUE	FALSE
cg00400532	chr15	53093509	53093510	ONECUT1	3175	-11299	CGI	FALSE	FALSE	TRUE
cg01569660	chr15	65369213	65369214	KBTBD13	390594	58	CGI	TRUE	FALSE	FALSE
cg02371363	chr15	73617541	73617542	HCN4	10021	44062	CGI	FALSE	TRUE	FALSE
cg04803686	chr15	90173805	90173806	KIF7	374654	24875	CGI-S-Shore	FALSE	TRUE	FALSE
cg05533723	chr15	31441236	31441237	TRPM1	4308	12238	Non-CGI	FALSE	TRUE	FALSE
cg05804504	chr15	68123487	68123488	SKOR1	390598	5545	CGI-S-Shore	FALSE	TRUE	FALSE
cg07431522	chr15	27210290	27210291	GABRG3	2567	-6137	CGI-N-Shelf	FALSE	FALSE	TRUE
cg07775813	chr15	69223368	69223369	SPESP1	246777	528	CGI	FALSE	TRUE	FALSE
cg07819987	chr15	55700894	55700895	FLJ27352	145788	170	CGI	TRUE	TRUE	FALSE
cg07967254	chr15	82042494	82042495	MEX3B	84206	295865	CGI	FALSE	FALSE	TRUE
cg08454546	chr15	59731340	59731341	FAM81A	145773	967	CGI-S-Shore	FALSE	TRUE	FALSE
cg10394898	chr15	69755745	69755746	LOC145837	145837	298	CGI-S-Shore	FALSE	TRUE	FALSE
cg11007426	chr15	89164106	89164107	AEN	64782	-419	CGI-N-Shore	TRUE	FALSE	FALSE
cg11162637	chr15	101818008	101818009	VIMP	55829	-307	CGI	TRUE	FALSE	FALSE
cg11582017	chr15	91414499	91414500	FURIN	5045	2613	CGI	FALSE	TRUE	FALSE
cg11977693	chr15	74420307	74420308	LOC283731	283731	1310	CGI	TRUE	TRUE	FALSE
cg12067423	chr15	85141633	85141634	ZSCAN2	54993	-2614	CGI-N-Shelf	FALSE	FALSE	TRUE
cg14393148	chr15	68797183	68797184	ITGA11	22801	-72690	Non-CGI	FALSE	FALSE	TRUE
cg14403327	chr15	73659048	73659049	HCN4	10021	2555	CGI-N-Shore	FALSE	TRUE	FALSE
cg15885043	chr15	29383103	29383104	NDNL2	56160	178915	CGI-N-Shelf	FALSE	TRUE	FALSE
cg17457701	chr15	86313860	86313861	MIR1276	100302121	-50	CGI-S-Shore	TRUE	TRUE	FALSE
cg17794320	chr15	90190822	90190823	KIF7	374654	7858	CGI-N-Shore	FALSE	TRUE	FALSE
cg19695978	chr15	70877381	70877382	UACA	55075	178467	CGI-N-Shore	FALSE	FALSE	TRUE
cg20626983	chr15	58650472	58650473	LIPC	3990	-52301	Non-CGI	FALSE	FALSE	TRUE
cg21296230	chr15	33010536	33010537	GREM1	26585	330	CGI	TRUE	TRUE	FALSE
cg21432729	chr15	79103201	79103202	ADAMTS7	11173	570	CGI	FALSE	TRUE	FALSE
cg21577365	chr15	22367858	22367859	OR4M2	390538	-618	Non-CGI	TRUE	TRUE	FALSE
cg21659431	chr15	98837004	98837005	FAM169B	283777	220605	CGI	FALSE	FALSE	TRUE
cg22259765	chr15	25119502	25119503	SNRPN	6638	50707	CGI-N-Shelf	FALSE	TRUE	FALSE
cg24597512	chr15	26874788	26874789	GABRA5	2558	-237076	CGI-S-Shore	TRUE	TRUE	FALSE
cg25273520	chr15	59713427	59713428	FAM81A	145773	-16943	Non-CGI	FALSE	FALSE	TRUE
cg26657240	chr15	81475061	81475062	IL16	3603	-30	Non-CGI	TRUE	FALSE	FALSE
cg26727768	chr15	37178201	37178202	LOC145845	145845	531	CGI-S-Shore	FALSE	TRUE	FALSE
cg00022235	chr16	11764847	11764848	SNN	8303	2557	CGI-S-Shore	FALSE	TRUE	FALSE
cg00263650	chr16	2159464	2159465	MIR1225	100188847	-19178	CGI	FALSE	TRUE	FALSE
cg00592007	chr16	1226235	1226236	CACNA1H	8912	22993	CGI	FALSE	TRUE	FALSE
cg01317045	chr16	57849655	57849656	KIFC3	3801	47076	Non-CGI	FALSE	TRUE	FALSE
cg01583716	chr16	7855518	7855519	TMEM114	283953	766706	CGI-S-Shore	FALSE	FALSE	TRUE
cg02459936	chr16	1830075	1830076	SPSB3	90864	2504	CGI-S-Shore	FALSE	TRUE	FALSE
cg02526982	chr16	85309801	85309802	LINC00311	197196	-6761	CGI-S-Shelf	FALSE	FALSE	TRUE
cg02805028	chr16	27899239	27899240	GSG1L	146395	175589	Non-CGI	FALSE	TRUE	FALSE
cg03033688	chr16	22824489	22824490	HS3ST2	9956	-1369	CGI-N-Shore	TRUE	FALSE	FALSE
cg03152880	chr16	48019794	48019795	ABCC12	94160	170133	Non-CGI	FALSE	FALSE	TRUE
cg04148285	chr16	89976788	89976789	MC1R	4157	-7497	CGI	FALSE	TRUE	FALSE
cg04389164	chr16	4377470	4377471	GLIS2	84662	-4744	CGI-N-Shore	FALSE	FALSE	TRUE
cg04654489	chr16	17165002	17165003	XYLT1	64131	399734	Non-CGI	FALSE	FALSE	TRUE
cg05007098	chr16	77322779	77322780	SYCE1L	100130958	89429	Non-CGI	FALSE	TRUE	FALSE
cg05181989	chr16	69795586	69795587	WWP2	11060	-686	CGI-N-Shore	TRUE	FALSE	FALSE
cg05395523	chr16	833250	833251	MSLNL	401827	-323	CGI-S-Shore	TRUE	FALSE	FALSE
cg05765011	chr16	4103225	4103226	ADCY9	115	62959	CGI	FALSE	TRUE	FALSE
cg05802204	chr16	88093422	88093423	BANP	54971	109183	CGI-S-Shore	FALSE	TRUE	FALSE
cg06056563	chr16	1018000	1018001	LMF1	64788	13316	CGI	FALSE	TRUE	FALSE
cg06326493	chr16	1820312	1820313	NME3	4832	1396	CGI	FALSE	TRUE	FALSE
cg06334495	chr16	1020046	1020047	LMF1	64788	11270	CGI	FALSE	TRUE	FALSE
cg07051704	chr16	71658155	71658156	MARVELD3	91862	-1913	CGI-N-Shore	TRUE	FALSE	FALSE
cg07092029	chr16	83682278	83682279	MIR3182	100422853	140326	Non-CGI	FALSE	TRUE	FALSE
cg07115206	chr16	6425686	6425687	RBFOX1	54715	356553	Non-CGI	FALSE	TRUE	FALSE
cg07187521	chr16	25422897	25422898	ZKSCAN2	342357	-154041	Non-CGI	FALSE	FALSE	TRUE
cg07305563	chr16	87741911	87741912	KLHDC4	54758	57685	CGI-S-Shore	FALSE	TRUE	FALSE
cg08204867	chr16	10208426	10208427	GRIN2A	2903	68183	Non-CGI	TRUE	TRUE	FALSE
cg08825075	chr16	3934709	3934710	CREBBP	1387	-4587	CGI-S-Shelf	FALSE	FALSE	TRUE
cg09066997	chr16	75300724	75300725	BCAR1	9564	1225	CGI-S-Shore	TRUE	TRUE	FALSE
cg09145053	chr16	84693437	84693438	KLHL36	79786	11305	CGI	FALSE	TRUE	FALSE
cg09175221	chr16	51973520	51973521	C16orf97	388276	134325	Non-CGI	FALSE	FALSE	TRUE
cg09185826	chr16	34407715	34407716	UBE2MP1	606551	-2952	CGI	FALSE	FALSE	TRUE
cg09436290	chr16	89663612	89663613	DPEP1	1800	-16102	CGI-S-Shore	FALSE	TRUE	FALSE
cg09947736	chr16	55091198	55091199	IRX5	10265	126086	CGI	FALSE	FALSE	TRUE
cg10272176	chr16	2904862	2904863	PRSS22	64063	3307	CGI-S-Shore	FALSE	TRUE	FALSE
cg10287545	chr16	2547038	2547039	ATP6V0C	527	-16687	CGI	TRUE	TRUE	FALSE
cg13552869	chr16	29909924	29909925	SEZ6L2	26470	659	CGI-N-Shore	FALSE	TRUE	FALSE
cg16525974	chr16	1081668	1081669	SSTR5	6755	-41086	CGI-S-Shore	FALSE	FALSE	TRUE
cg17234150	chr16	24266905	24266906	CACNG3	10368	30	CGI-N-Shore	TRUE	FALSE	FALSE
cg17463287	chr16	71475335	71475336	ZNF23	7571	47880	CGI-N-Shore	FALSE	FALSE	TRUE
cg19311153	chr16	71659830	71659831	MARVELD3	91862	-238	CGI-N-Shore	TRUE	FALSE	FALSE
cg20220196	chr16	111753	111754	SNRNP25	79622	7923	CGI	FALSE	TRUE	FALSE
cg21048669	chr16	78056379	78056380	CLEC3A	10143	-62	Non-CGI	TRUE	FALSE	FALSE
cg21514871	chr16	3307814	3307815	MEFV	4210	-1186	CGI-S-Shelf	TRUE	FALSE	FALSE
cg22791932	chr16	88537374	88537375	ZFPM1	161882	17359	CGI	FALSE	TRUE	FALSE
cg24433189	chr16	1128689	1128690	SSTR5-AS1	146336	40	CGI-S-Shore	TRUE	TRUE	FALSE
cg26585899	chr16	71914820	71914821	ZNF821	55565	3271	CGI-N-Shelf	TRUE	TRUE	FALSE
cg26648818	chr16	52581719	52581720	TOX3	27324	-4	CGI-S-Shore	TRUE	FALSE	FALSE
cg26681017	chr16	89723193	89723194	CHMP1A	5119	934	CGI-N-Shore	TRUE	TRUE	FALSE
cg27014354	chr16	69222573	69222574	SNTB2	6645	1522	CGI-S-Shore	FALSE	TRUE	FALSE
cg27453745	chr16	86546938	86546939	FOXF1	2294	2804	CGI	FALSE	TRUE	FALSE
cg27460547	chr16	3493681	3493682	NAA60	79903	12	CGI	TRUE	FALSE	FALSE
cg27589654	chr16	27060571	27060572	C16orf82	162083	-17646	CGI-N-Shelf	FALSE	FALSE	TRUE
cg00647040	chr17	12634361	12634362	ARHGAP44	9912	-58466	Non-CGI	FALSE	TRUE	FALSE
cg00759043	chr17	73894891	73894892	TRIM65	201292	-1836	CGI-S-Shore	TRUE	TRUE	FALSE
cg00802224	chr17	77194129	77194130	ENGASE	64772	123109	CGI	FALSE	TRUE	FALSE
cg01158079	chr17	79086430	79086431	MIR657	724027	12741	CGI	FALSE	TRUE	FALSE
cg01332462	chr17	30986200	30986201	CDK5R1	8851	172094	Non-CGI	FALSE	TRUE	FALSE
cg03076037	chr17	79071361	79071362	MIR657	724027	27810	CGI-N-Shore	TRUE	TRUE	FALSE
cg03297092	chr17	77403634	77403635	RBFOX3	146713	75044	Non-CGI	FALSE	TRUE	FALSE
cg03584363	chr17	43129629	43129630	DCAKD	79877	8842	CGI	TRUE	TRUE	FALSE
cg03784170	chr17	8121849	8121850	LINC00324	284029	5510	CGI-N-Shelf	FALSE	FALSE	TRUE
cg04258457	chr17	62207789	62207790	ERN1	2081	-286	CGI	TRUE	FALSE	FALSE
cg04763450	chr17	79455576	79455577	ACTG1	71	24314	CGI	FALSE	FALSE	TRUE
cg04935521	chr17	79098772	79098773	MIR657	724027	399	CGI-S-Shore	TRUE	TRUE	FALSE
cg06490225	chr17	35298825	35298826	LHX1	3975	4052	CGI-S-Shore	FALSE	TRUE	FALSE
cg06565253	chr17	38518714	38518715	GJD3	125111	2229	CGI	TRUE	TRUE	FALSE
cg07661564	chr17	44919658	44919659	WNT9B	7484	-9308	CGI-S-Shore	FALSE	FALSE	TRUE
cg07997877	chr17	1810853	1810854	RPA1	6117	77579	CGI	FALSE	FALSE	TRUE
cg08366845	chr17	6796745	6796746	ALOX12P2	245	39849	CGI-N-Shore	TRUE	TRUE	FALSE
cg08759569	chr17	77302351	77302352	RBFOX3	146713	176327	CGI	FALSE	TRUE	FALSE
cg09529165	chr17	45808345	45808346	TBX21	30009	-2263	CGI-N-Shelf	FALSE	FALSE	TRUE
cg11076954	chr17	1508444	1508445	SLC43A2	124935	23684	CGI-N-Shore	TRUE	TRUE	FALSE
cg11190890	chr17	73870956	73870957	TRIM47	91107	3698	CGI	FALSE	TRUE	FALSE
cg11637712	chr17	36665844	36665845	ARHGAP23	57636	81123	CGI	FALSE	TRUE	FALSE
cg12169852	chr17	57231726	57231727	SKA2	348235	1072	CGI	TRUE	TRUE	FALSE
cg12586179	chr17	80349858	80349859	UTS2R	2837	17656	CGI	FALSE	TRUE	FALSE
cg12591951	chr17	48113764	48113765	LOC284080	284080	19337	Non-CGI	FALSE	FALSE	TRUE
cg13148085	chr17	65242711	65242712	HELZ	9931	-1391	CGI-S-Shore	TRUE	FALSE	FALSE
cg13639244	chr17	17717006	17717007	MIR33B	693120	237	CGI	TRUE	TRUE	FALSE
cg14330868	chr17	12631363	12631364	ARHGAP44	9912	-61464	Non-CGI	FALSE	TRUE	FALSE
cg14767407	chr17	17699286	17699287	SMCR5	140771	-16442	CGI-S-Shore	FALSE	TRUE	FALSE
cg14783471	chr17	36574754	36574755	ARHGAP23	57636	-9964	CGI-N-Shore	FALSE	FALSE	TRUE
cg16276850	chr17	38498914	38498915	GJD3	125111	22029	CGI	TRUE	TRUE	FALSE
cg16332577	chr17	37886349	37886350	MIEN1	84299	437	CGI-N-Shore	FALSE	TRUE	FALSE
cg16532606	chr17	46036419	46036420	PRR15L	79170	-1308	Non-CGI	TRUE	FALSE	FALSE
cg16614940	chr17	58602862	58602863	APPBP2	10513	716	CGI-N-Shore	FALSE	TRUE	FALSE
cg17274378	chr17	79168726	79168727	AZI1	22994	28023	CGI-S-Shore	TRUE	TRUE	FALSE
cg17872658	chr17	78856861	78856862	CHMP6	79643	-108778	CGI	FALSE	TRUE	FALSE
cg18372208	chr17	41278263	41278264	NBR2	10230	662	CGI	TRUE	TRUE	FALSE
cg18557086	chr17	2304670	2304671	MNT	4335	-411	CGI	TRUE	FALSE	FALSE
cg20024403	chr17	81039326	81039327	METRNL	284207	1758	CGI	FALSE	TRUE	FALSE
cg20326572	chr17	79655163	79655164	HGS	9146	4200	CGI-N-Shore	FALSE	TRUE	FALSE
cg20557071	chr17	2279156	2279157	MNT	4335	25100	CGI	TRUE	TRUE	FALSE
cg20939114	chr17	65471507	65471508	PITPNC1	26207	97582	CGI	FALSE	TRUE	FALSE
cg22285438	chr17	915895	915896	MIR3183	100422835	9902	CGI	TRUE	TRUE	FALSE
cg23530268	chr17	74925720	74925721	MGAT5B	146664	60921	CGI-N-Shelf	FALSE	TRUE	FALSE
cg23742111	chr17	32906064	32906065	C17orf102	400591	322	CGI	TRUE	FALSE	FALSE
cg24795046	chr17	42393317	42393318	RUNDC3A	10900	7389	CGI	FALSE	TRUE	FALSE
cg25006521	chr17	72932588	72932589	OTOP3	347741	773	CGI	FALSE	TRUE	FALSE
cg25510591	chr17	11212090	11212091	SHISA6	388336	67349	Non-CGI	FALSE	TRUE	FALSE
cg26250129	chr17	79239903	79239904	C17orf89	284184	26797	CGI	FALSE	TRUE	FALSE
cg26588812	chr17	72428976	72428977	GPRC5C	55890	1308	CGI	TRUE	TRUE	FALSE
cg27426707	chr17	48639585	48639586	CACNA1G-AS1	253962	-115	CGI	TRUE	TRUE	FALSE
cg00231483	chr18	70211959	70211960	CBLN2	147381	-235	CGI	TRUE	FALSE	FALSE
cg06165470	chr18	6885601	6885602	LINC00668	400643	44265	Non-CGI	FALSE	TRUE	FALSE
cg12380867	chr18	14999178	14999179	MIR3156-2	100422907	169012	CGI	FALSE	FALSE	TRUE
cg13217994	chr18	77496887	77496888	CTDP1	9150	57085	CGI	FALSE	TRUE	FALSE
cg13589431	chr18	77609786	77609787	KCNG2	26251	-13880	CGI	FALSE	FALSE	TRUE
cg16204205	chr18	19753432	19753433	GATA6	2627	4015	CGI-S-Shore	FALSE	TRUE	FALSE
cg20368463	chr18	77673604	77673605	PQLC1	80148	38047	CGI-S-Shore	FALSE	TRUE	FALSE
cg20726001	chr18	18821389	18821390	GREB1L	80000	-812	CGI	TRUE	FALSE	FALSE
cg22151773	chr18	33078241	33078242	INO80C	125476	-285	CGI-S-Shore	TRUE	FALSE	FALSE
cg23708717	chr18	47793175	47793176	CCDC11	220136	-309	CGI-S-Shore	TRUE	FALSE	FALSE
cg24055556	chr18	9913434	9913435	VAPA	9218	-519	CGI	TRUE	FALSE	FALSE
cg25040850	chr18	48512555	48512556	SMAD4	4089	18167	Non-CGI	FALSE	TRUE	FALSE
cg27376271	chr18	70211835	70211836	CBLN2	147381	-111	CGI-S-Shore	TRUE	FALSE	FALSE
cg00708736	chr19	9204578	9204579	OR1M1	125963	656	CGI-S-Shore	TRUE	FALSE	FALSE
cg00910067	chr19	33717545	33717546	SLC7A10	56301	-788	CGI	TRUE	FALSE	FALSE
cg01282906	chr19	37566286	37566287	ZNF420	147923	-3094	CGI-N-Shelf	FALSE	FALSE	TRUE
cg01327602	chr19	55952038	55952039	SHISA7	729956	2190	CGI	FALSE	TRUE	FALSE
cg01532010	chr19	57107283	57107284	ZNF71	58491	618	CGI-S-Shore	FALSE	TRUE	FALSE
cg01871907	chr19	2703055	2703056	GNG7	2788	-308	CGI-S-Shore	TRUE	FALSE	FALSE
cg02229261	chr19	52222431	52222432	HAS1	3036	4788	CGI-N-Shore	TRUE	TRUE	FALSE
cg02324006	chr19	1080034	1080035	HMHA1	23526	14103	CGI	FALSE	TRUE	FALSE
cg02329010	chr19	4373196	4373197	SH3GL1	6455	27367	CGI-S-Shore	FALSE	TRUE	FALSE
cg03165176	chr19	1456886	1456887	APC2	10297	6737	CGI	TRUE	TRUE	FALSE
cg03708254	chr19	51295078	51295079	ACPT	93650	1405	CGI	FALSE	TRUE	FALSE
cg04547181	chr19	6721855	6721856	C3	718	-1192	Non-CGI	TRUE	FALSE	FALSE
cg04700648	chr19	52888958	52888959	ZNF528	84436	-12161	Non-CGI	TRUE	TRUE	FALSE
cg05657800	chr19	36350479	36350480	KIRREL2	84063	2668	CGI-N-Shore	FALSE	TRUE	FALSE
cg06054552	chr19	41060564	41060565	SHKBP1	92799	-22191	CGI	FALSE	TRUE	FALSE
cg06581818	chr19	45033454	45033455	CEACAM20	125931	92	Non-CGI	FALSE	TRUE	FALSE
cg06612450	chr19	35767682	35767683	HAMP	57817	-5726	CGI-N-Shore	FALSE	TRUE	FALSE
cg06909547	chr19	1226966	1226967	C19orf26	255057	11022	CGI	FALSE	TRUE	FALSE
cg07002447	chr19	19648890	19648891	CILP2	148113	-182	CGI-S-Shore	TRUE	FALSE	FALSE
cg07555272	chr19	50712498	50712499	MYH14	79784	5612	CGI-N-Shore	FALSE	TRUE	FALSE
cg07626482	chr19	47289503	47289504	SLC1A5	6510	2337	CGI-N-Shore	TRUE	TRUE	FALSE
cg07748854	chr19	36449875	36449876	LRFN3	79414	21852	CGI-N-Shore	FALSE	FALSE	TRUE
cg07872854	chr19	6203421	6203422	ACSBG2	81616	67769	CGI-S-Shelf	FALSE	FALSE	TRUE
cg07974627	chr19	58171878	58171879	ZSCAN4	201516	-8423	CGI-N-Shelf	FALSE	FALSE	TRUE
cg08205443	chr19	56608801	56608802	ZNF787	126208	23846	CGI-N-Shore	FALSE	TRUE	FALSE
cg08342619	chr19	56914764	56914765	ZNF583	147949	-617	CGI-N-Shore	TRUE	FALSE	FALSE
cg08438837	chr19	292436	292437	PPAP2C	8612	-1000	CGI-S-Shore	TRUE	FALSE	FALSE
cg08681293	chr19	1221756	1221757	STK11	6794	15957	CGI	FALSE	TRUE	FALSE
cg09255748	chr19	40004995	40004996	SELV	348303	-756	CGI-N-Shore	TRUE	FALSE	FALSE
cg10134651	chr19	15539926	15539927	AKAP8L	26993	-10092	CGI-S-Shore	FALSE	TRUE	FALSE
cg10139436	chr19	30219558	30219559	C19orf12	83636	-13105	CGI-S-Shelf	FALSE	FALSE	TRUE
cg10372770	chr19	12377156	12377157	ZNF44	51710	28556	CGI	FALSE	TRUE	FALSE
cg11337780	chr19	11977718	11977719	ZNF439	90594	18138	Non-CGI	FALSE	TRUE	FALSE
cg11800802	chr19	34110183	34110184	CHST8	64377	-2676	CGI-N-Shore	FALSE	FALSE	TRUE
cg12272488	chr19	10151833	10151834	C3P1	388503	-197	Non-CGI	TRUE	FALSE	FALSE
cg13350173	chr19	38281183	38281184	ZNF573	126231	26755	CGI	FALSE	TRUE	FALSE
cg14016200	chr19	10399157	10399158	ICAM5	7087	-1496	CGI-S-Shore	TRUE	TRUE	FALSE
cg14018233	chr19	15871304	15871305	OR10H3	26532	19100	CGI-S-Shore	FALSE	TRUE	FALSE
cg15655714	chr19	51018365	51018366	ASPDH	554235	-417	CGI-S-Shore	TRUE	FALSE	FALSE
cg15787604	chr19	17501969	17501970	PLVAP	83483	-13831	CGI	FALSE	FALSE	TRUE
cg16511225	chr19	51920932	51920933	SIGLEC10	89790	123	CGI-S-Shelf	TRUE	FALSE	FALSE
cg17107617	chr19	42894693	42894694	CNFN	84518	-248	CGI-S-Shelf	TRUE	FALSE	FALSE
cg17385497	chr19	883879	883880	MED16	10025	9337	CGI-S-Shore	FALSE	TRUE	FALSE
cg17688689	chr19	8404965	8404966	KANK3	256949	3179	CGI-N-Shelf	FALSE	TRUE	FALSE
cg17711567	chr19	44325008	44325009	LYPD5	284348	-199	CGI	TRUE	FALSE	FALSE
cg18336281	chr19	33717487	33717488	SLC7A10	56301	-730	CGI	TRUE	FALSE	FALSE
cg18415772	chr19	1503042	1503043	ADAMTSL5	339366	10144	CGI-N-Shore	FALSE	FALSE	TRUE
cg18741372	chr19	45906156	45906157	CD3EAP	10849	-3309	CGI-S-Shore	FALSE	TRUE	FALSE
cg18955367	chr19	49002338	49002339	LMTK3	114783	14106	CGI	FALSE	TRUE	FALSE
cg19032797	chr19	7956056	7956057	LRRC8E	80131	2665	CGI-S-Shelf	FALSE	TRUE	FALSE
cg19345277	chr19	57646138	57646139	ZIM3	114026	10430	Non-CGI	FALSE	TRUE	FALSE
cg19399220	chr19	10527588	10527589	PDE4A	5141	138	CGI	TRUE	TRUE	FALSE
cg19771975	chr19	18726088	18726089	TMEM59L	25789	2405	CGI-S-Shelf	FALSE	TRUE	FALSE
cg19785918	chr19	36001995	36001996	DMKN	93099	2563	CGI-S-Shore	TRUE	TRUE	FALSE
cg19853565	chr19	2540907	2540908	GADD45B	4616	64783	CGI	FALSE	TRUE	FALSE
cg19878479	chr19	49015582	49015583	LMTK3	114783	862	CGI	FALSE	TRUE	FALSE
cg20606555	chr19	52452094	52452095	ZNF613	79898	21405	CGI-N-Shore	TRUE	FALSE	FALSE
cg21177456	chr19	519611	519612	TPGS1	91978	12113	CGI	FALSE	TRUE	FALSE
cg22472023	chr19	48389615	48389616	SULT2A1	6822	37	Non-CGI	TRUE	FALSE	FALSE
cg22519313	chr19	1572260	1572261	MEX3D	399664	-4202	CGI-S-Shelf	FALSE	FALSE	TRUE
cg23090606	chr19	43970034	43970035	LYPD3	27076	-202	CGI-S-Shore	TRUE	FALSE	FALSE
cg23158022	chr19	16605905	16605906	CALR3	125972	1096	CGI-N-Shore	TRUE	TRUE	FALSE
cg24164517	chr19	5539808	5539809	TINCR	257000	28195	CGI-S-Shelf	FALSE	FALSE	TRUE
cg24447095	chr19	58610131	58610132	ZSCAN18	65982	19660	CGI-S-Shore	TRUE	TRUE	FALSE
cg25340403	chr19	43969650	43969651	LYPD3	27076	179	CGI-S-Shore	TRUE	FALSE	FALSE
cg25361850	chr19	52391789	52391790	ZNF577	84765	2354	CGI-S-Shore	TRUE	TRUE	FALSE
cg26332114	chr19	57742260	57742261	AURKC	6795	-115	CGI	TRUE	FALSE	FALSE
cg26687173	chr19	33623091	33623092	WDR88	126248	92	CGI	TRUE	FALSE	FALSE
cg26827876	chr19	51409609	51409610	KLK4	9622	4383	CGI-N-Shelf	FALSE	TRUE	FALSE
cg27071707	chr19	1614334	1614335	UQCR11	10975	-8850	CGI-N-Shore	FALSE	TRUE	FALSE
cg27361914	chr19	51567972	51567973	KLK13	26085	393	CGI	TRUE	TRUE	FALSE
ch.19.299931F	chr19	5648180	5648182	SAFB	6294	25133	CGI-N-Shore	FALSE	TRUE	FALSE
cg01879048	chr20	61675079	61675080	LOC100144597	100144597	5715	CGI	FALSE	TRUE	FALSE
cg02547263	chr20	32450501	32450502	CHMP4B	128866	51390	CGI-N-Shore	FALSE	FALSE	TRUE
cg02849754	chr20	40627977	40627978	CHD6	84181	-380843	CGI	FALSE	FALSE	TRUE
cg03044178	chr20	61151721	61151722	MIR1-1	406904	207	CGI	FALSE	TRUE	FALSE
cg04271991	chr20	48124114	48124115	KCNB1	3745	-23623	Non-CGI	FALSE	TRUE	FALSE
cg04694744	chr20	48522966	48522967	SPATA2	9825	9112	CGI	FALSE	TRUE	FALSE
cg04721719	chr20	3992787	3992788	RNF24	11237	3427	CGI-N-Shelf	FALSE	TRUE	FALSE
cg06032090	chr20	17209845	17209846	PCSK2	5126	3092	CGI-S-Shore	FALSE	TRUE	FALSE
cg06499565	chr20	35374747	35374748	NDRG3	57446	-205	CGI	TRUE	FALSE	FALSE
cg10187713	chr20	49345687	49345688	PARD6B	84612	-2392	CGI-N-Shore	FALSE	FALSE	TRUE
cg10399899	chr20	62705081	62705082	RGS19	10287	6241	CGI-N-Shore	FALSE	TRUE	FALSE
cg10922808	chr20	54978525	54978526	CASS4	57091	-8641	CGI-N-Shore	FALSE	TRUE	FALSE
cg12411847	chr20	60512094	60512095	MIR1257	100302168	16622	CGI	FALSE	TRUE	FALSE
cg13127741	chr20	31331821	31331822	COMMD7	149951	-6	CGI-S-Shore	TRUE	FALSE	FALSE
cg14143580	chr20	29960982	29960983	DEFB118	117285	4560	Non-CGI	FALSE	TRUE	FALSE
cg16681830	chr20	62586920	62586921	UCKL1	54963	878	CGI-N-Shore	TRUE	TRUE	FALSE
cg16757724	chr20	43935528	43935529	RBPJL	11317	36	CGI	TRUE	TRUE	FALSE
cg18376773	chr20	44878374	44878375	CDH22	64405	58761	CGI-N-Shore	FALSE	TRUE	FALSE
cg20526800	chr20	33880825	33880826	FAM83C	128876	-599	CGI-S-Shore	TRUE	FALSE	FALSE
cg21227784	chr20	60511759	60511760	MIR1257	100302168	16957	CGI-S-Shore	FALSE	TRUE	FALSE
cg21396537	chr20	34653573	34653574	LINC00657	647979	-14690	CGI-S-Shore	FALSE	FALSE	TRUE
cg21509100	chr20	42965115	42965116	R3HDML	140902	-509	Non-CGI	TRUE	FALSE	FALSE
cg22876894	chr20	1783624	1783625	LOC100289473	100289473	-23231	CGI	FALSE	FALSE	TRUE
cg23506077	chr20	34824050	34824051	AAR2	25980	-348	CGI-N-Shore	TRUE	FALSE	FALSE
cg26040816	chr20	42816135	42816136	JPH2	57158	81	Non-CGI	TRUE	FALSE	FALSE
cg27337176	chr20	61151467	61151468	MIR1-1	406904	-44	CGI-S-Shore	TRUE	TRUE	FALSE
cg00106925	chr21	45881105	45881106	LRRC3	81543	5711	CGI-S-Shelf	FALSE	FALSE	TRUE
cg00204649	chr21	43227994	43227995	RIPK4	54101	-40744	CGI-N-Shore	FALSE	TRUE	FALSE
cg05969018	chr21	47056933	47056934	PCBP3	54039	-6748	CGI-N-Shore	FALSE	FALSE	TRUE
cg07658590	chr21	46963587	46963588	SLC19A1	6573	736	CGI-S-Shore	TRUE	TRUE	FALSE
cg08701609	chr21	34961305	34961306	SON	6651	45954	CGI	TRUE	TRUE	FALSE
cg09195550	chr21	45746856	45746857	C21orf2	755	12427	CGI-S-Shore	FALSE	TRUE	FALSE
cg16797790	chr21	46117306	46117307	KRTAP10-12	386685	218	Non-CGI	TRUE	TRUE	FALSE
cg27280688	chr21	43823809	43823810	UBASH3A	53347	-160	Non-CGI	TRUE	FALSE	FALSE
cg00793954	chr22	50862027	50862028	SBF1	6305	51435	CGI-N-Shore	TRUE	TRUE	FALSE
cg03619118	chr22	41252225	41252226	ST13	6767	460	CGI	TRUE	TRUE	FALSE
cg08270630	chr22	50330655	50330656	CRELD2	79174	18371	CGI-S-Shore	FALSE	FALSE	TRUE
cg09087937	chr22	29185252	29185253	XBP1	7494	11306	Non-CGI	FALSE	TRUE	FALSE
cg13304665	chr22	22862802	22862803	ZNF280B	140883	701	CGI	FALSE	TRUE	FALSE
cg14153321	chr22	38246051	38246052	EIF3L	51386	671	CGI-S-Shore	TRUE	TRUE	FALSE
cg16103159	chr22	26561575	26561576	SEZ6L	23544	-3863	CGI-N-Shelf	FALSE	FALSE	TRUE
cg16834011	chr22	19931790	19931791	TXNRD2	10587	-2430	CGI-S-Shelf	FALSE	TRUE	FALSE
cg17855101	chr22	30122327	30122328	CABP7	164633	5982	CGI-N-Shelf	FALSE	TRUE	FALSE
cg18621123	chr22	47569642	47569643	LOC339685	339685	-171677	CGI-N-Shore	FALSE	TRUE	FALSE
cg27436324	chr22	35694370	35694371	TOM1	10043	-896	CGI-N-Shore	TRUE	FALSE	FALSE
cg27468704	chr22	26875823	26875824	HPS4	89781	3995	CGI-N-Shelf	TRUE	TRUE	FALSE
