# Supplementary material for: H3K4me1 marks DNA regions hypomethylated during aging in human stem and differentiated cells
Source: HighWire-hosted journal article supplement (doi:10.1101/gr.169011.113), 2014-09-30
Supplement: Supplemental_Table_25.xlsx [file Supplemental_Table_25.xlsx]

## Sheet: ST25
Supplemental Table 25: List of convergent CpG sites where the Euclidean distance (ED) between MZ twins decreased (> 2-fold) with age
Target ID	Chromosome	start	end	nearest.gene	nearest.gene.id	disttotss	hmm.cpgi	prom.reg	intra.reg	inter.reg
cg00396230	chr1	23037116	23037117	EPHB2	2048	-213	CGI	TRUE	FALSE	FALSE
cg00543329	chr1	36235839	36235840	CLSPN	63967	-287	CGI-S-Shore	TRUE	FALSE	FALSE
cg00968203	chr1	117284465	117284466	CD2	914	-12619	CGI	FALSE	FALSE	TRUE
cg03745244	chr1	16399725	16399726	FAM131C	348487	400	CGI	FALSE	TRUE	FALSE
cg06444984	chr1	153651297	153651298	NPR1	4881	132	CGI	TRUE	FALSE	FALSE
cg06620092	chr1	114697523	114697524	SYT6	148281	-1050	CGI	TRUE	FALSE	FALSE
cg07201754	chr1	39491318	39491319	NDUFS5	4725	-647	CGI-N-Shore	TRUE	FALSE	FALSE
cg10180406	chr1	186649877	186649878	PTGS2	5743	-317	CGI	TRUE	FALSE	FALSE
cg12798157	chr1	19600719	19600720	AKR7L	246181	-150	CGI	TRUE	FALSE	FALSE
cg14653225	chr1	228003938	228003939	PRSS38	339501	519	CGI	FALSE	TRUE	FALSE
cg14793596	chr1	1290092	1290093	DVL1	1855	-5599	CGI	FALSE	TRUE	FALSE
cg14976971	chr1	229478633	229478634	CCSAP	126731	53	CGI	FALSE	TRUE	FALSE
cg15487867	chr1	1475742	1475743	TMEM240	339453	-1	CGI	TRUE	FALSE	FALSE
cg15578948	chr1	1689012	1689013	SLC35E2B	728661	-11573	CGI	FALSE	TRUE	FALSE
cg17252808	chr1	178994930	178994931	FAM20B	9917	-142	CGI	TRUE	FALSE	FALSE
cg18174052	chr1	183604830	183604831	ARPC5	10092	153	CGI	TRUE	FALSE	FALSE
cg18194483	chr1	44064515	44064516	KDM4A	9682	-51280	CGI-S-Shore	TRUE	TRUE	FALSE
cg18892537	chr1	151966104	151966105	S100A10	6281	608	CGI	TRUE	TRUE	FALSE
cg18966232	chr1	3183165	3183166	MIR4251	100422968	138625	CGI	FALSE	TRUE	FALSE
cg19937480	chr1	45987798	45987799	PRDX1	5052	762	CGI	TRUE	TRUE	FALSE
cg21164723	chr1	214776304	214776305	CENPF	1063	-226	CGI	TRUE	FALSE	FALSE
cg22221669	chr1	145438279	145438280	TXNIP	10628	-181	CGI	TRUE	FALSE	FALSE
cg22802111	chr1	160068614	160068615	IGSF8	93185	2	CGI	TRUE	FALSE	FALSE
cg23926367	chr1	19574023	19574024	EMC1	23065	4021	CGI-N-Shelf	FALSE	TRUE	FALSE
cg24254517	chr1	212208526	212208527	DTL	51514	-391	CGI	TRUE	TRUE	FALSE
cg24357276	chr1	114472822	114472823	HIPK1	204851	825	CGI	TRUE	TRUE	FALSE
cg24425531	chr1	15372951	15372952	TMEM51-AS1	200197	106007	CGI-N-Shelf	FALSE	TRUE	FALSE
cg25208724	chr1	156163844	156163845	SLC25A44	9673	113	CGI	TRUE	FALSE	FALSE
cg26879777	chr1	155145220	155145221	TRIM46	80128	-199	CGI-N-Shore	TRUE	TRUE	FALSE
cg00792783	chr2	198669748	198669749	PLCL1	5334	321	CGI	TRUE	FALSE	FALSE
cg01400477	chr2	170218258	170218259	LRP2	4036	862	CGI	FALSE	TRUE	FALSE
cg03599729	chr2	200820225	200820226	C2orf47	79568	184	CGI	TRUE	TRUE	FALSE
cg06679003	chr2	38152283	38152284	RMDN2	151393	-177	CGI	TRUE	FALSE	FALSE
cg08802203	chr2	233415465	233415466	EIF4E2	9470	107	CGI	TRUE	TRUE	FALSE
cg18455731	chr2	3215537	3215538	TSSC1	7260	166114	CGI-S-Shore	FALSE	TRUE	FALSE
cg19617395	chr2	232651134	232651135	COPS7B	64708	4688	CGI	TRUE	TRUE	FALSE
cg19924719	chr2	10920066	10920067	PDIA6	10130	58035	CGI-S-Shelf	FALSE	TRUE	FALSE
cg22076123	chr2	170282921	170282922	KLHL41	10324	-53083	CGI	FALSE	FALSE	TRUE
cg23475109	chr2	97530683	97530684	SEMA4C	54910	5050	CGI-S-Shelf	TRUE	TRUE	FALSE
cg26447968	chr2	74682200	74682201	INO80B-WBP1	100532735	49	CGI	TRUE	FALSE	FALSE
cg00031303	chr3	195681400	195681401	SDHAP1	255812	35748	CGI	FALSE	FALSE	TRUE
cg01448194	chr3	20049624	20049625	PP2D1	151649	4139	Non-CGI	FALSE	TRUE	FALSE
cg03060546	chr3	49711283	49711284	APEH	327	-150	CGI	TRUE	FALSE	FALSE
cg03826463	chr3	186211670	186211671	LOC253573	253573	-219	CGI	TRUE	FALSE	FALSE
cg05888082	chr3	108308525	108308526	KIAA1524	57650	-33	CGI	TRUE	FALSE	FALSE
cg11605617	chr3	32612461	32612462	DYNC1LI1	51143	-94	CGI	TRUE	FALSE	FALSE
cg12105765	chr3	183947332	183947333	VWA5B2	90113	-983	CGI	TRUE	FALSE	FALSE
cg18060685	chr3	50329850	50329851	IFRD2	7866	497	CGI	TRUE	TRUE	FALSE
cg20970111	chr3	195934604	195934605	ZDHHC19	131540	3694	CGI	FALSE	TRUE	FALSE
cg21612339	chr3	49761620	49761621	GMPPB	29925	-235	CGI	TRUE	FALSE	FALSE
cg23719848	chr3	110790763	110790764	PVRL3	25945	156	CGI	TRUE	FALSE	FALSE
cg24050613	chr3	186648279	186648280	ST6GAL1	6480	-34	CGI	TRUE	FALSE	FALSE
cg27505273	chr3	137483543	137483544	SOX14	8403	408	CGI	TRUE	FALSE	FALSE
cg02929209	chr4	53588595	53588596	SNORA26	677810	9178	CGI	FALSE	FALSE	TRUE
cg04737207	chr4	140222858	140222859	NAA15	80155	181	CGI	TRUE	TRUE	FALSE
cg05795596	chr4	154170783	154170784	ANXA2P1	303	59178	CGI	FALSE	TRUE	FALSE
cg06789048	chr4	3416881	3416882	HGFAC	3083	-26843	CGI	FALSE	TRUE	FALSE
cg07767534	chr4	84031145	84031146	PLAC8	51316	4764	CGI	TRUE	TRUE	FALSE
cg13078134	chr4	165109478	165109479	ANP32C	23520	9383	CGI	FALSE	TRUE	FALSE
cg14029686	chr4	2765767	2765768	TNIP2	79155	-7663	CGI	FALSE	FALSE	TRUE
cg14308286	chr4	22780491	22780492	GBA3	57733	85942	CGI	FALSE	TRUE	FALSE
cg15846316	chr4	57371719	57371720	ARL9	132946	343	CGI	FALSE	TRUE	FALSE
cg16170181	chr4	144258448	144258449	GAB1	2549	464	CGI	FALSE	TRUE	FALSE
cg17290159	chr4	57843785	57843786	NOA1	84273	39	CGI	TRUE	FALSE	FALSE
cg17666096	chr4	141294787	141294788	LOC100129858	100129858	-240	CGI	TRUE	TRUE	FALSE
cg19671926	chr4	122722719	122722720	EXOSC9	5393	246	CGI	TRUE	TRUE	FALSE
cg23653712	chr4	52904379	52904380	SGCB	6443	104	CGI	FALSE	TRUE	FALSE
cg24789447	chr4	148402574	148402575	EDNRA	1909	504	CGI	FALSE	TRUE	FALSE
cg24917627	chr4	48271835	48271836	TEC	7006	-20	CGI	TRUE	FALSE	FALSE
cg27297724	chr4	48781911	48781912	FRYL	285527	403	CGI	FALSE	TRUE	FALSE
cg01993799	chr5	177027141	177027142	B4GALT7	11285	21	CGI	TRUE	FALSE	FALSE
cg04196933	chr5	178195556	178195557	ZNF354A	6940	-37852	Non-CGI	FALSE	TRUE	FALSE
cg05859395	chr5	203595	203596	LRRC14B	389257	11968	CGI-N-Shore	FALSE	FALSE	TRUE
cg09567642	chr5	70751435	70751436	BDP1	55814	-5	CGI	TRUE	FALSE	FALSE
cg14704758	chr5	146888890	146888891	DPYSL3	1809	727	CGI	FALSE	TRUE	FALSE
cg17290488	chr5	179281560	179281561	C5orf45	51149	4278	CGI-N-Shelf	FALSE	TRUE	FALSE
cg17546366	chr5	145724443	145724444	POU4F3	5459	5855	CGI	FALSE	FALSE	TRUE
cg18066271	chr5	100236783	100236784	ST8SIA4	7903	2202	CGI	FALSE	TRUE	FALSE
cg18530551	chr5	172670879	172670880	NKX2-5	1482	-8563	CGI	FALSE	FALSE	TRUE
cg21153026	chr5	130599493	130599494	CDC42SE2	56990	-207	CGI	TRUE	FALSE	FALSE
cg25087958	chr5	34915621	34915622	BRIX1	55299	-197	CGI	TRUE	TRUE	FALSE
cg25461827	chr5	133801682	133801683	CDKN2AIPNL	91368	-54083	CGI	FALSE	FALSE	TRUE
cg26827058	chr5	132947004	132947005	FSTL4	23105	1217	CGI	FALSE	TRUE	FALSE
cg01097444	chr6	33378345	33378346	PHF1	5252	-426	CGI	TRUE	FALSE	FALSE
cg01171360	chr6	293285	293286	DUSP22	56940	1183	CGI	FALSE	TRUE	FALSE
cg01923549	chr6	41774024	41774025	TOMM6	100188893	19845	CGI	FALSE	TRUE	FALSE
cg02259877	chr6	33217421	33217422	HCG25	414765	107	CGI	TRUE	FALSE	FALSE
cg02808397	chr6	159656576	159656577	FNDC1	84624	66146	CGI-S-Shore	FALSE	TRUE	FALSE
cg04062567	chr6	27861237	27861238	HIST1H2BO	8348	33	CGI-S-Shore	TRUE	FALSE	FALSE
cg04173139	chr6	31601385	31601386	SNORA38	677820	10528	CGI-S-Shore	FALSE	TRUE	FALSE
cg09657982	chr6	1424677	1424678	FOXF2	2295	34607	Non-CGI	FALSE	FALSE	TRUE
cg10599345	chr6	137114243	137114244	MAP3K5	4217	-586	CGI	TRUE	FALSE	FALSE
cg10624161	chr6	107349251	107349252	C6orf203	51250	-154	CGI-N-Shore	TRUE	FALSE	FALSE
cg10733080	chr6	157527564	157527565	TMEM242	729515	217687	CGI	FALSE	TRUE	FALSE
cg14619640	chr6	30585541	30585542	MRPS18B	28973	54	CGI	TRUE	FALSE	FALSE
cg17875922	chr6	37045823	37045824	FGD2	221472	72399	Non-CGI	FALSE	FALSE	TRUE
cg18739800	chr6	27806020	27806021	HIST1H2AK	8330	95	CGI	TRUE	FALSE	FALSE
cg20980653	chr6	33143760	33143761	COL11A2	1302	16483	Non-CGI	FALSE	TRUE	FALSE
cg21026663	chr6	26189234	26189235	HIST1H4D	8360	68	CGI	TRUE	FALSE	FALSE
cg21427300	chr6	74233399	74233400	EEF1A1	1915	-2643	CGI	FALSE	FALSE	TRUE
cg22085055	chr6	27661905	27661906	LOC100507173	100507173	90	CGI	TRUE	FALSE	FALSE
cg26668828	chr6	292823	292824	DUSP22	56940	721	CGI	FALSE	TRUE	FALSE
cg02400740	chr7	19157938	19157939	TWIST1	7291	-642	CGI	TRUE	FALSE	FALSE
cg04214710	chr7	157602725	157602726	LOC100506585	100506585	-44550	CGI	FALSE	TRUE	FALSE
cg04961235	chr7	4901628	4901629	PAPOLB	56903	-2	CGI	TRUE	TRUE	FALSE
cg06642093	chr7	104653910	104653911	LOC100216545	100216545	676	CGI	TRUE	FALSE	FALSE
cg07123811	chr7	156761107	156761108	NOM1	64434	18689	CGI	FALSE	TRUE	FALSE
cg08368520	chr7	4747026	4747027	FOXK1	221937	63637	CGI	FALSE	TRUE	FALSE
cg08906366	chr7	4803811	4803812	AP5Z1	9907	-11449	CGI	FALSE	TRUE	FALSE
cg13775091	chr7	158066145	158066146	MIR595	693180	259358	CGI	FALSE	TRUE	FALSE
cg14743534	chr7	44079036	44079037	FLJ35390	255031	337	CGI-N-Shore	TRUE	TRUE	FALSE
cg14784944	chr7	4855785	4855786	MIR4656	100616465	-27514	CGI-N-Shore	FALSE	TRUE	FALSE
cg14785449	chr7	97501736	97501737	ASNS	440	116	CGI	TRUE	FALSE	FALSE
cg15304692	chr7	150065217	150065218	REPIN1	29803	-142	CGI-N-Shore	TRUE	FALSE	FALSE
cg15532408	chr7	151083252	151083253	WDR86-AS1	100131176	-23068	CGI-S-Shelf	FALSE	TRUE	FALSE
cg18185116	chr7	598729	598730	FLJ44511	441307	38700	CGI	FALSE	TRUE	FALSE
cg20964328	chr7	11013816	11013817	PHF14	9678	316	CGI	TRUE	FALSE	FALSE
cg21447117	chr7	27224873	27224874	HOXA11	3207	-30	CGI	TRUE	FALSE	FALSE
cg21928307	chr7	36192369	36192370	EEPD1	80820	-465	CGI	TRUE	FALSE	FALSE
cg24701257	chr7	73097740	73097741	DNAJC30	84277	39	CGI	TRUE	FALSE	FALSE
cg24957423	chr7	138554232	138554233	ATP6V0A4	50617	-71290	CGI-S-Shore	FALSE	TRUE	FALSE
cg00467244	chr8	142428240	142428241	PTP4A3	11156	-3765	CGI	FALSE	TRUE	FALSE
cg00892792	chr8	142297584	142297585	SLC45A4	57210	-33358	CGI	FALSE	FALSE	TRUE
cg01795694	chr8	102217913	102217914	ZNF706	51123	45	CGI	TRUE	FALSE	FALSE
cg03184037	chr8	30891338	30891339	PURG	29942	-106	CGI	TRUE	FALSE	FALSE
cg07002711	chr8	63998640	63998641	TTPA	7274	-27	CGI	TRUE	FALSE	FALSE
cg10891996	chr8	67687474	67687475	PTTG3P	26255	-7233	CGI	TRUE	TRUE	FALSE
cg12822242	chr8	127572993	127572994	FAM84B	157638	-2281	CGI-S-Shelf	FALSE	FALSE	TRUE
cg14231959	chr8	1897035	1897036	KBTBD11	9920	-25007	CGI	FALSE	TRUE	FALSE
cg22873130	chr8	6264171	6264172	MCPH1	79648	57	CGI	TRUE	FALSE	FALSE
cg23311531	chr8	94712629	94712630	LINC00535	642924	30	CGI	TRUE	FALSE	FALSE
cg25340432	chr8	3974225	3974226	CSMD1	64478	878101	CGI	FALSE	TRUE	FALSE
cg26844171	chr8	42249271	42249272	VDAC3	7419	-6	CGI	TRUE	FALSE	FALSE
cg14188185	chr9	140293218	140293219	EXD3	54932	24494	CGI	FALSE	TRUE	FALSE
cg14250054	chr9	35829428	35829429	TMEM8B	51754	205	CGI	TRUE	TRUE	FALSE
cg05807485	chr10	133850441	133850442	BNIP3	664	-55005	CGI	FALSE	FALSE	TRUE
cg08299755	chr10	99496695	99496696	ZFYVE27	118813	-181	CGI	TRUE	FALSE	FALSE
cg08978597	chr10	8087295	8087296	GATA3-AS1	399717	8150	CGI	FALSE	FALSE	TRUE
cg09053680	chr10	135044114	135044115	UTF1	8433	335	CGI	TRUE	FALSE	FALSE
cg10607059	chr10	114709760	114709761	TCF7L2	6934	-247	CGI	TRUE	FALSE	FALSE
cg11371933	chr10	53459365	53459366	CSTF2T	23283	-9	CGI	TRUE	TRUE	FALSE
cg11591516	chr10	85954316	85954317	CDHR1	92211	-94	CGI	TRUE	FALSE	FALSE
cg16633951	chr10	42971575	42971576	LINC00839	84856	635	CGI	FALSE	TRUE	FALSE
cg17133967	chr10	60144921	60144922	TFAM	7019	-253	CGI	TRUE	FALSE	FALSE
cg17567560	chr10	105036863	105036864	INA	9118	-55	CGI	TRUE	FALSE	FALSE
cg22851378	chr10	133747932	133747933	PPP2R2D	55844	-26	CGI-N-Shelf	TRUE	FALSE	FALSE
cg24831879	chr10	5566908	5566909	CALML3	810	-14	CGI	TRUE	FALSE	FALSE
cg25561913	chr10	77161129	77161130	ZNF503-AS2	100131213	-155	CGI	TRUE	FALSE	FALSE
cg00861580	chr11	47788813	47788814	FNBP4	23360	178	CGI	TRUE	FALSE	FALSE
cg05953285	chr11	65530530	65530531	AP5B1	91056	17290	CGI	FALSE	FALSE	TRUE
cg08378782	chr11	64512197	64512198	RASGRP2	10235	729	CGI	TRUE	TRUE	FALSE
cg15676512	chr11	62609102	62609103	WDR74	54663	177	CGI-S-Shore	TRUE	FALSE	FALSE
cg16048161	chr11	31391307	31391308	DCDC1	341019	48	CGI	TRUE	FALSE	FALSE
cg16228688	chr11	66247121	66247122	DPP3	10072	-757	CGI-N-Shore	TRUE	FALSE	FALSE
cg16351441	chr11	63057592	63057593	SLC22A25	387601	-60467	Non-CGI	TRUE	TRUE	FALSE
cg17142743	chr11	43600177	43600178	MIR129-2	406918	-2765	CGI	FALSE	FALSE	TRUE
cg22306015	chr11	66454625	66454626	RBM4B	83759	-9349	Non-CGI	FALSE	TRUE	FALSE
cg22437258	chr11	111473054	111473055	SIK2	23235	-114	CGI	TRUE	FALSE	FALSE
cg22914934	chr11	76156056	76156057	C11orf30	56946	-11	CGI	TRUE	FALSE	FALSE
cg23312964	chr11	47430184	47430185	PSMC3	5702	17838	CGI	TRUE	TRUE	FALSE
cg23478547	chr11	69259265	69259266	CCND1	595	-196606	CGI	FALSE	FALSE	TRUE
cg23660999	chr11	777775	777776	PDDC1	347862	-287	CGI	TRUE	FALSE	FALSE
cg24615831	chr11	112097290	112097291	PTS	5805	201	CGI	FALSE	TRUE	FALSE
cg25401284	chr11	61582697	61582698	MIR1908	100302263	13	CGI	TRUE	TRUE	FALSE
cg26812728	chr11	67980797	67980798	SUV420H1	51111	269	CGI	TRUE	TRUE	FALSE
cg03854198	chr12	5541311	5541312	NTF3	4908	30	CGI	TRUE	FALSE	FALSE
cg03892062	chr12	124835216	124835217	FAM101A	144347	61505	CGI-S-Shore	FALSE	TRUE	FALSE
cg05188358	chr12	132323376	132323377	MMP17	4326	10434	CGI	FALSE	TRUE	FALSE
cg06286685	chr12	107714930	107714931	BTBD11	121551	2732	CGI	FALSE	TRUE	FALSE
cg06297571	chr12	132270829	132270830	MMP17	4326	-42110	CGI	FALSE	TRUE	FALSE
cg08724310	chr12	25055304	25055305	BCAT1	586	47087	CGI	TRUE	TRUE	FALSE
cg13614229	chr12	131217218	131217219	RIMBP2	23504	-16391	CGI	FALSE	FALSE	TRUE
cg20041683	chr12	10766282	10766283	MAGOHB	55110	-73	CGI	TRUE	FALSE	FALSE
cg21273703	chr12	133464351	133464352	CHFR	55743	-146	CGI	TRUE	FALSE	FALSE
cg22968445	chr12	42538818	42538819	GXYLT1	283464	-144	CGI	TRUE	FALSE	FALSE
cg23311950	chr12	74931760	74931761	ATXN7L3B	552889	208	CGI	TRUE	FALSE	FALSE
cg24795297	chr12	46663281	46663282	SLC38A1	81539	-72	CGI	TRUE	FALSE	FALSE
cg24967142	chr12	112280161	112280162	MAPKAPK5	8550	-116	CGI	TRUE	FALSE	FALSE
cg25314152	chr12	133295495	133295496	PGAM5	192111	30859	CGI	FALSE	TRUE	FALSE
cg01885050	chr13	41240761	41240762	FOXO1	2308	-26	CGI	TRUE	FALSE	FALSE
cg03490460	chr13	114840698	114840699	RASA3	22821	57395	CGI	FALSE	TRUE	FALSE
cg06102790	chr13	45992569	45992570	SLC25A30	253512	-52	CGI	TRUE	FALSE	FALSE
cg07883124	chr13	113634042	113634043	MCF2L-AS1	100289410	-11089	CGI	TRUE	TRUE	FALSE
cg19895882	chr13	42534974	42534975	VWA8	23078	245	CGI	TRUE	TRUE	FALSE
cg24545961	chr13	96205960	96205961	DZIP1	22873	90995	CGI	FALSE	TRUE	FALSE
cg00929411	chr14	77648491	77648492	TMEM63C	57156	388	CGI	FALSE	TRUE	FALSE
cg06826120	chr14	102422152	102422153	DYNC1H1	1778	-8711	CGI	FALSE	FALSE	TRUE
cg10158614	chr14	78227190	78227191	C14orf178	283579	16	CGI	TRUE	TRUE	FALSE
cg11108269	chr14	36989404	36989405	NKX2-1	7080	24	CGI	TRUE	TRUE	FALSE
cg14376917	chr14	21131367	21131368	ANG	283	-20967	CGI-N-Shore	TRUE	FALSE	FALSE
cg18509271	chr14	77494952	77494953	IRF2BPL	64207	80	CGI	TRUE	FALSE	FALSE
cg26116969	chr14	101526807	101526808	MIR496	574454	-101	CGI-S-Shore	TRUE	FALSE	FALSE
cg26117778	chr14	106938335	106938336	LINC00221	338005	-118	CGI	TRUE	TRUE	FALSE
cg00655702	chr15	91478531	91478532	HDDC3	374659	-2756	CGI	TRUE	TRUE	FALSE
cg12229505	chr15	80351983	80351984	ZFAND6	54469	72	CGI	TRUE	FALSE	FALSE
cg17798749	chr15	90233986	90233987	PEX11A	8800	-27	CGI	TRUE	FALSE	FALSE
cg21952685	chr15	59063274	59063275	FAM63B	54629	-117	CGI	TRUE	FALSE	FALSE
cg26247618	chr15	44119245	44119246	WDR76	79968	132	CGI	TRUE	FALSE	FALSE
cg26516004	chr15	75019376	75019377	CYP1A1	1543	-1498	CGI	TRUE	FALSE	FALSE
cg00938305	chr16	30569736	30569737	ZNF764	92595	-93	CGI	TRUE	FALSE	FALSE
cg01110955	chr16	1706924	1706925	HN1L	90861	-21352	CGI-S-Shore	FALSE	TRUE	FALSE
cg01161919	chr16	30750542	30750543	PHKG2	5261	-9076	CGI	FALSE	TRUE	FALSE
cg02828564	chr16	87445371	87445372	MAP1LC3B	81631	19569	CGI	FALSE	TRUE	FALSE
cg03426194	chr16	27500918	27500919	IL21R-AS1	283888	-36203	CGI	FALSE	TRUE	FALSE
cg03919836	chr16	58426331	58426332	GINS3	64785	32	CGI	TRUE	FALSE	FALSE
cg03981906	chr16	2732514	2732515	KCTD5	54442	18	CGI	TRUE	FALSE	FALSE
cg05201865	chr16	25026718	25026719	ARHGAP17	55114	-42	CGI	TRUE	FALSE	FALSE
cg06084907	chr16	3551038	3551039	CLUAP1	23059	74	CGI	TRUE	FALSE	FALSE
cg07953400	chr16	619759	619760	NHLRC4	283948	2726	CGI	TRUE	TRUE	FALSE
cg09140090	chr16	27215225	27215226	KDM8	79831	417	CGI	TRUE	TRUE	FALSE
cg09343327	chr16	20912245	20912246	ERI2	112479	-683	CGI	TRUE	TRUE	FALSE
cg10019392	chr16	87934324	87934325	SLC7A5	8140	-31223	CGI-N-Shelf	FALSE	TRUE	FALSE
cg10190104	chr16	72042350	72042351	DHODH	1723	-291	CGI-N-Shore	TRUE	FALSE	FALSE
cg27470012	chr16	48643924	48643925	N4BP1	9683	194	CGI	TRUE	FALSE	FALSE
cg08122232	chr17	74100132	74100133	EXOC7	23265	-263	CGI	TRUE	FALSE	FALSE
cg09199933	chr17	41561366	41561367	DHX8	1659	31	CGI	TRUE	FALSE	FALSE
cg13344169	chr17	71161178	71161179	SSTR2	6752	17	CGI	TRUE	FALSE	FALSE
cg14627921	chr17	76593346	76593347	DNAH17	8632	-19869	Non-CGI	FALSE	FALSE	TRUE
cg14822696	chr17	79935258	79935259	ASPSCR1	79058	-166	CGI	TRUE	FALSE	FALSE
cg16293631	chr17	38020606	38020607	IKZF3	22806	-164	CGI	TRUE	FALSE	FALSE
cg16328582	chr17	76440722	76440723	PGS1	9489	65986	CGI	FALSE	TRUE	FALSE
cg16518742	chr17	40811438	40811439	TUBG2	27175	171	CGI	TRUE	FALSE	FALSE
cg16766889	chr17	48637951	48637952	CACNA1G	8913	-496	CGI	TRUE	TRUE	FALSE
cg18603466	chr17	33446966	33446967	RAD51L3-RFFL	100529207	1573	CGI	TRUE	TRUE	FALSE
cg22560074	chr17	66420744	66420745	MIR635	693220	-54	Non-CGI	TRUE	TRUE	FALSE
cg22839729	chr17	56065581	56065582	VEZF1	7716	32	CGI	TRUE	FALSE	FALSE
cg23649161	chr17	41132662	41132663	RUNDC1	146923	79	CGI	TRUE	FALSE	FALSE
cg23987548	chr17	73401912	73401913	GRB2	2885	-121	CGI	TRUE	FALSE	FALSE
cg26050159	chr17	42837242	42837243	ADAM11	4185	673	CGI-S-Shore	TRUE	TRUE	FALSE
cg27564939	chr17	2207243	2207244	SRR	63826	-3	CGI	TRUE	FALSE	FALSE
cg27614120	chr17	77386099	77386100	RBFOX3	146713	92579	CGI-N-Shore	FALSE	TRUE	FALSE
cg16924702	chr18	5544231	5544232	EPB41L3	23136	86409	CGI-S-Shore	TRUE	TRUE	FALSE
cg20256961	chr18	71959244	71959245	CYB5A	1528	5	CGI	TRUE	FALSE	FALSE
cg03313751	chr19	41857626	41857627	TMEM91	641649	809	CGI	FALSE	TRUE	FALSE
cg04311994	chr19	5231268	5231269	PTPRS	5802	109544	CGI	FALSE	TRUE	FALSE
cg08593051	chr19	49866963	49866964	DKKL1	27120	-22	CGI	TRUE	FALSE	FALSE
cg08854169	chr19	51869678	51869679	ETFB	2109	-5	CGI	TRUE	FALSE	FALSE
cg10181822	chr19	18335419	18335420	RAB3A	5864	-20544	CGI	TRUE	TRUE	FALSE
cg10691036	chr19	49622443	49622444	C19orf73	55150	-45	CGI	TRUE	FALSE	FALSE
cg11854791	chr19	3761509	3761510	APBA3	9546	162	CGI-N-Shore	TRUE	TRUE	FALSE
cg12659027	chr19	39881847	39881848	MED29	55588	-114	CGI	TRUE	FALSE	FALSE
cg13352717	chr19	17405195	17405196	ABHD8	79575	9085	CGI	FALSE	TRUE	FALSE
cg17140797	chr19	15529788	15529789	AKAP8L	26993	43	CGI	TRUE	FALSE	FALSE
cg18059215	chr19	33095349	33095350	PDCD5	9141	23254	CGI	FALSE	TRUE	FALSE
cg22922010	chr19	40888270	40888271	HIPK4	147746	7822	CGI-S-Shore	FALSE	TRUE	FALSE
cg22935432	chr19	52900988	52900989	ZNF528	84436	-131	CGI-N-Shore	TRUE	FALSE	FALSE
cg23245297	chr19	3275842	3275843	CELF5	60680	51140	CGI	FALSE	TRUE	FALSE
cg23520075	chr19	54371944	54371945	MYADM	91663	2332	CGI	TRUE	TRUE	FALSE
cg25267765	chr19	56905094	56905095	ZNF582-AS1	386758	48	CGI	TRUE	FALSE	FALSE
cg25411327	chr19	5210703	5210704	PTPRS	5802	130109	CGI	FALSE	TRUE	FALSE
cg25982880	chr19	4916593	4916594	UHRF1	29128	7082	CGI	FALSE	TRUE	FALSE
cg26259181	chr19	14247518	14247519	ASF1B	55723	-77	CGI	TRUE	FALSE	FALSE
cg27066638	chr19	19754454	19754455	GMIP	51291	0	CGI	TRUE	FALSE	FALSE
cg27647661	chr19	18942575	18942576	UPF1	5976	-167	CGI	TRUE	FALSE	FALSE
cg01335729	chr20	278801	278802	ZCCHC3	85364	596	CGI	TRUE	FALSE	FALSE
cg03658009	chr20	20033184	20033185	C20orf26	26074	25	CGI	TRUE	TRUE	FALSE
cg04508476	chr20	34239394	34239395	RBM12	10137	13482	Non-CGI	FALSE	TRUE	FALSE
cg06318401	chr20	3212919	3212920	SLC4A11	83959	6966	CGI-S-Shore	FALSE	TRUE	FALSE
cg09667649	chr20	36156804	36156805	BLCAP	10904	-470	CGI	TRUE	FALSE	FALSE
cg09987011	chr20	44936040	44936041	CDH22	64405	1095	CGI	FALSE	TRUE	FALSE
cg04101050	chr21	40984700	40984701	C21orf88	114041	47	CGI	TRUE	TRUE	FALSE
cg05174710	chr21	36164748	36164749	LOC100506385	100506385	46625	CGI	FALSE	TRUE	FALSE
cg03338209	chr22	37908796	37908797	CARD10	29775	6580	CGI-N-Shelf	FALSE	TRUE	FALSE
cg15348974	chr22	37678548	37678549	CYTH4	27128	52	Non-CGI	TRUE	FALSE	FALSE
cg18399321	chr22	39853590	39853591	MGAT3	4248	264	CGI	FALSE	TRUE	FALSE
cg21220614	chr22	43266108	43266109	ARFGAP3	26286	-12699	CGI	FALSE	TRUE	FALSE
cg00026457	chr1	200116736	200116737	FAM58BP	339521	-65918	CGI	FALSE	TRUE	FALSE
cg00884805	chr1	68296607	68296608	GNG12-AS1	100289178	-1362	CGI-N-Shore	TRUE	TRUE	FALSE
cg00935430	chr1	227751290	227751291	ZNF678	339500	69	CGI	TRUE	FALSE	FALSE
cg01012560	chr1	235324573	235324574	RBM34	23029	197	CGI	TRUE	TRUE	FALSE
cg01472176	chr1	226074946	226074947	TMEM63A	9725	-4525	CGI-S-Shore	FALSE	TRUE	FALSE
cg01939443	chr1	182456796	182456797	RGSL1	353299	37539	Non-CGI	TRUE	TRUE	FALSE
cg02341559	chr1	67603174	67603175	IL23R	149233	-1414	CGI-S-Shelf	TRUE	FALSE	FALSE
cg03401738	chr1	65991664	65991665	LEPR	3953	105532	CGI	FALSE	TRUE	FALSE
cg04127825	chr1	167503222	167503223	CD247	919	-15374	Non-CGI	FALSE	FALSE	TRUE
cg04226892	chr1	201637173	201637174	NAV1	89796	19722	Non-CGI	FALSE	TRUE	FALSE
cg04875097	chr1	193104571	193104572	MIR1278	100302163	-1060	Non-CGI	TRUE	TRUE	FALSE
cg06828770	chr1	149857314	149857315	HIST2H2BE	8349	916	CGI	TRUE	FALSE	FALSE
cg07146531	chr1	187343088	187343089	PLA2G4A	5321	545055	Non-CGI	FALSE	FALSE	TRUE
cg07232688	chr1	100644688	100644689	LRRC39	127495	-887	Non-CGI	TRUE	FALSE	FALSE
cg08291024	chr1	165324411	165324412	LMX1A	4009	1539	CGI	FALSE	TRUE	FALSE
cg09254855	chr1	27846843	27846844	WASF2	10163	-30164	CGI-N-Shelf	FALSE	FALSE	TRUE
cg09318521	chr1	224301995	224301996	FBXO28	23219	203	CGI	TRUE	FALSE	FALSE
cg09684066	chr1	183891565	183891566	GLT25D2	23127	115311	CGI-S-Shore	FALSE	TRUE	FALSE
cg09821112	chr1	205719462	205719463	NUCKS1	64710	-89	CGI	TRUE	FALSE	FALSE
cg10509014	chr1	89234354	89234355	PKN2	5586	84431	Non-CGI	FALSE	TRUE	FALSE
cg11192022	chr1	156571543	156571544	GPATCH4	54865	-263	CGI-S-Shore	TRUE	FALSE	FALSE
cg11734019	chr1	156258991	156258992	TMEM79	84283	6286	CGI-S-Shelf	FALSE	TRUE	FALSE
cg11840112	chr1	56099184	56099185	MIR4422	100616272	407869	Non-CGI	FALSE	TRUE	FALSE
cg12112058	chr1	224622605	224622606	WDR26	80232	-603	CGI	TRUE	FALSE	FALSE
cg12133952	chr1	44497352	44497353	SLC6A9	6536	-217	CGI-S-Shore	TRUE	FALSE	FALSE
cg12458966	chr1	223674115	223674116	C1orf65	164127	107399	Non-CGI	FALSE	FALSE	TRUE
cg12699768	chr1	175115788	175115789	KIAA0040	9674	46439	Non-CGI	FALSE	TRUE	FALSE
cg13225511	chr1	93641639	93641640	TMED5	50999	4605	CGI-N-Shelf	FALSE	TRUE	FALSE
cg14155849	chr1	156722321	156722322	MRPL24	79590	-11397	CGI-S-Shore	TRUE	TRUE	FALSE
cg14375163	chr1	1296488	1296489	MXRA8	54587	667	CGI	FALSE	TRUE	FALSE
cg14984649	chr1	85101435	85101436	C1orf180	439927	-731	Non-CGI	TRUE	FALSE	FALSE
cg15211996	chr1	2936768	2936769	ACTRT2	140625	-1276	CGI-N-Shore	TRUE	FALSE	FALSE
cg15894563	chr1	149859690	149859691	HIST2H2AB	317772	-223	CGI	TRUE	FALSE	FALSE
cg16062480	chr1	220219722	220219723	EPRS	2058	276	CGI	TRUE	TRUE	FALSE
cg17444595	chr1	54665462	54665463	CYB5RL	606495	282	CGI	TRUE	TRUE	FALSE
cg17758137	chr1	2779563	2779564	TTC34	100287898	-73332	CGI-S-Shore	FALSE	FALSE	TRUE
cg18018694	chr1	86195775	86195776	ZNHIT6	54680	-21658	Non-CGI	FALSE	TRUE	FALSE
cg18317531	chr1	225688425	225688426	LBR	3930	-71867	Non-CGI	FALSE	TRUE	FALSE
cg18945601	chr1	151320034	151320035	RFX5	5993	-264	CGI-S-Shore	TRUE	FALSE	FALSE
cg19025723	chr1	28562708	28562709	ATPIF1	93974	105	CGI	TRUE	FALSE	FALSE
cg20433447	chr1	54868559	54868560	SSBP3	23648	3531	CGI-N-Shelf	FALSE	TRUE	FALSE
cg20741333	chr1	10924583	10924584	CASZ1	54897	-67875	CGI-S-Shore	FALSE	FALSE	TRUE
cg20930040	chr1	42685845	42685846	GUCA2A	2980	-55449	Non-CGI	FALSE	TRUE	FALSE
cg21686225	chr1	23886191	23886192	ID3	3399	92	CGI	TRUE	FALSE	FALSE
cg24863624	chr1	11322899	11322900	MTOR	2475	-290	CGI	TRUE	FALSE	FALSE
cg25726684	chr1	87288288	87288289	2015-09-01	9403	91817	Non-CGI	FALSE	FALSE	TRUE
cg26229879	chr1	156571314	156571315	GPATCH4	54865	-34	CGI	TRUE	FALSE	FALSE
ch.1.1029351R	chr1	31734918	31734920	NKAIN1	79570	-22183	Non-CGI	FALSE	TRUE	FALSE
ch.1.190144434F	chr1	191877811	191877813	RGS18	64407	-249778	Non-CGI	FALSE	FALSE	TRUE
cg00297702	chr2	203735559	203735560	ICA1L	130026	810	CGI-N-Shore	FALSE	TRUE	FALSE
cg01247188	chr2	101025961	101025962	CHST10	9486	8167	Non-CGI	FALSE	TRUE	FALSE
cg01290568	chr2	113593859	113593860	IL1B	3553	495	Non-CGI	TRUE	TRUE	FALSE
cg01344813	chr2	133630172	133630173	LYPD1	116372	-201101	Non-CGI	FALSE	TRUE	FALSE
cg01953317	chr2	55642894	55642895	CCDC88A	55704	4161	CGI-N-Shelf	FALSE	TRUE	FALSE
cg02084491	chr2	56411447	56411448	MIR216B	100126319	-183516	CGI	TRUE	TRUE	FALSE
cg02103918	chr2	112936096	112936097	FBLN7	129804	40133	CGI-N-Shelf	FALSE	TRUE	FALSE
cg04227743	chr2	155711998	155711999	KCNJ3	3760	156904	Non-CGI	FALSE	TRUE	FALSE
cg04819081	chr2	24026544	24026545	ATAD2B	54454	123390	Non-CGI	FALSE	TRUE	FALSE
cg05300577	chr2	241500044	241500045	ANKMY1	51281	229	CGI	TRUE	TRUE	FALSE
cg05676510	chr2	1311570	1311571	TPO	7173	-66423	CGI	FALSE	TRUE	FALSE
cg05991009	chr2	102080674	102080675	RFX8	731220	10489	Non-CGI	FALSE	TRUE	FALSE
cg06177306	chr2	133927261	133927262	NCKAP5	344148	398768	Non-CGI	FALSE	TRUE	FALSE
cg06492372	chr2	97573176	97573177	SEMA4C	54910	-37440	CGI-N-Shelf	FALSE	TRUE	FALSE
cg08663425	chr2	127818046	127818047	BIN1	274	46855	CGI	FALSE	TRUE	FALSE
cg12748639	chr2	71035898	71035899	CLEC4F	165530	11832	Non-CGI	FALSE	TRUE	FALSE
cg14000519	chr2	54046438	54046439	MIR3682	100500850	29902	Non-CGI	FALSE	TRUE	FALSE
cg14301129	chr2	27546269	27546270	MPV17	4358	2276	CGI	TRUE	TRUE	FALSE
cg14649965	chr2	73456858	73456859	PRADC1	84279	3496	CGI-N-Shelf	FALSE	TRUE	FALSE
cg16203802	chr2	28015108	28015109	MRPL33	9553	20523	Non-CGI	FALSE	TRUE	FALSE
cg17836842	chr2	28319151	28319152	MIR4263	100422965	99916	Non-CGI	FALSE	TRUE	FALSE
cg19327341	chr2	71454317	71454318	PAIP2B	400961	-83	CGI	TRUE	FALSE	FALSE
cg20473155	chr2	10688228	10688229	ODC1	4953	-99774	CGI	FALSE	FALSE	TRUE
cg21583821	chr2	242062093	242062094	MTERFD2	130916	-20345	CGI-N-Shelf	FALSE	TRUE	FALSE
cg21843755	chr2	71558577	71558578	ZNF638	27332	54853	CGI-N-Shore	TRUE	TRUE	FALSE
cg22324487	chr2	113816832	113816833	IL36RN	26525	616	Non-CGI	FALSE	TRUE	FALSE
cg23497791	chr2	121983739	121983740	TFCP2L1	29842	59037	CGI-S-Shore	FALSE	TRUE	FALSE
cg25242561	chr2	195086870	195086871	SLC39A10	57181	-1434660	Non-CGI	FALSE	FALSE	TRUE
cg25503044	chr2	74730557	74730558	LBX2	85474	-113	CGI	TRUE	FALSE	FALSE
cg26258152	chr2	220142610	220142611	DNAJB2	3300	-1428	CGI-N-Shore	TRUE	FALSE	FALSE
cg26949612	chr2	179121368	179121369	OSBPL6	114880	62159	Non-CGI	FALSE	TRUE	FALSE
cg00038298	chr3	49235033	49235034	CCDC36	339834	-826	CGI-N-Shore	TRUE	FALSE	FALSE
cg00214395	chr3	149167242	149167243	TM4SF4	7104	-25124	CGI-S-Shelf	FALSE	FALSE	TRUE
cg02223350	chr3	100429064	100429065	TFG	10342	929	CGI-S-Shore	FALSE	TRUE	FALSE
cg03052789	chr3	50603449	50603450	HEMK1	51409	-3132	CGI-N-Shore	TRUE	TRUE	FALSE
cg05684005	chr3	151035780	151035781	GPR87	53836	-1143	Non-CGI	TRUE	TRUE	FALSE
cg07744536	chr3	25915549	25915550	LINC00692	285326	-362	Non-CGI	TRUE	FALSE	FALSE
cg10124773	chr3	39448150	39448151	RPSA	3921	-52	CGI	TRUE	FALSE	FALSE
cg11151929	chr3	120068323	120068324	LRRC58	116064	-136	CGI	TRUE	FALSE	FALSE
cg11584376	chr3	4789075	4789076	EGOT	100126791	4197	Non-CGI	FALSE	TRUE	FALSE
cg15308664	chr3	27763797	27763798	EOMES	8320	407	CGI	TRUE	TRUE	FALSE
cg21214362	chr3	183875808	183875809	DVL3	1857	2523	CGI-S-Shore	FALSE	TRUE	FALSE
cg21742058	chr3	65563196	65563197	MAGI1	9223	461311	Non-CGI	FALSE	TRUE	FALSE
cg23327829	chr3	36898394	36898395	TRANK1	9881	88152	Non-CGI	FALSE	TRUE	FALSE
cg24791846	chr3	177000330	177000331	TBL1XR1	79718	-85281	Non-CGI	FALSE	FALSE	TRUE
cg25857637	chr3	108363248	108363249	KIAA1524	57650	-54756	Non-CGI	FALSE	TRUE	FALSE
cg26275430	chr3	51813232	51813233	IQCF6	440956	-28	Non-CGI	TRUE	FALSE	FALSE
cg02001694	chr4	147099913	147099914	LSM6	11157	3077	CGI-S-Shelf	FALSE	TRUE	FALSE
cg02715115	chr4	148605624	148605625	PRMT10	90826	-343	CGI	TRUE	FALSE	FALSE
cg03315456	chr4	57525626	57525627	HOPX	84525	22244	CGI-S-Shelf	FALSE	TRUE	FALSE
cg04658846	chr4	528022	528023	ZNF721	170960	-34579	CGI	FALSE	TRUE	FALSE
cg04824913	chr4	887549	887550	GAK	2580	38623	CGI	FALSE	TRUE	FALSE
cg10954765	chr4	3412750	3412751	HGFAC	3083	-30974	CGI-N-Shore	FALSE	TRUE	FALSE
cg11688944	chr4	4670855	4670856	LOC100507266	100507266	126996	CGI	FALSE	TRUE	FALSE
cg15813460	chr4	3250921	3250922	MSANTD1	345222	153	CGI-N-Shore	TRUE	FALSE	FALSE
cg21833476	chr4	95129167	95129168	SMARCAD1	56916	407	CGI	TRUE	TRUE	FALSE
cg23151374	chr4	164415611	164415612	TMA16	55319	-60	CGI	TRUE	FALSE	FALSE
cg25987417	chr4	76823448	76823449	PPEF2	5470	231	Non-CGI	TRUE	FALSE	FALSE
cg26644779	chr4	2280924	2280925	MXD4	10608	-17184	CGI-S-Shelf	FALSE	TRUE	FALSE
cg26678245	chr4	88876673	88876674	SPP1	6696	-20127	Non-CGI	FALSE	FALSE	TRUE
cg27442931	chr4	154074124	154074125	TRIM2	23321	-144	CGI	TRUE	FALSE	FALSE
cg01057132	chr5	169190508	169190509	DOCK2	1794	126256	Non-CGI	FALSE	TRUE	FALSE
cg02267483	chr5	140810404	140810405	PCDHGA12	26025	245	CGI	TRUE	TRUE	FALSE
cg02352685	chr5	180377617	180377618	BTNL3	10917	-38226	Non-CGI	FALSE	TRUE	FALSE
cg03347590	chr5	134366162	134366163	PITX1	5307	3800	CGI-S-Shore	FALSE	TRUE	FALSE
cg04097219	chr5	142629749	142629750	NR3C1	2908	185326	Non-CGI	FALSE	FALSE	TRUE
cg05008688	chr5	121464372	121464373	ZNF474	133923	-841	Non-CGI	TRUE	FALSE	FALSE
cg05262173	chr5	76131154	76131155	S100Z	170591	-14670	Non-CGI	FALSE	FALSE	TRUE
cg06942904	chr5	131826485	131826486	IRF1	3659	4772	CGI	TRUE	TRUE	FALSE
cg07238699	chr5	71929673	71929674	ZNF366	167465	-126423	Non-CGI	FALSE	FALSE	TRUE
cg08873008	chr5	154237430	154237431	CNOT8	9337	-377	CGI	TRUE	FALSE	FALSE
cg10010574	chr5	134094201	134094202	DDX46	9879	-258	CGI-N-Shore	TRUE	FALSE	FALSE
cg12907969	chr5	89815060	89815061	LYSMD3	116068	10339	Non-CGI	FALSE	TRUE	FALSE
cg13725763	chr5	135271366	135271367	FBXL21	26223	5359	Non-CGI	TRUE	TRUE	FALSE
cg16265906	chr5	115152326	115152327	CDO1	1036	77	CGI	TRUE	FALSE	FALSE
cg16641691	chr5	177038624	177038625	B4GALT7	11285	11504	CGI-S-Shelf	FALSE	FALSE	TRUE
cg17333036	chr5	138942208	138942209	UBE2D2	7322	1456	CGI-S-Shore	FALSE	TRUE	FALSE
cg17846796	chr5	153868992	153868993	HAND1	9421	-11167	CGI-N-Shelf	FALSE	FALSE	TRUE
cg18296956	chr5	140090936	140090937	VTRNA1-1	56664	74	CGI	TRUE	FALSE	FALSE
cg25985480	chr5	1484002	1484003	SLC6A3	6531	-38458	CGI	FALSE	TRUE	FALSE
cg26122710	chr5	1835623	1835624	NDUFS6	4726	34126	CGI	FALSE	FALSE	TRUE
cg26358634	chr5	62365115	62365116	LRRC70	100130733	490552	Non-CGI	FALSE	FALSE	TRUE
cg26970113	chr5	133710892	133710893	UBE2B	7320	4021	CGI-S-Shelf	FALSE	TRUE	FALSE
ch.5.1979606R	chr5	107988832	107988834	FER	2241	-94688	Non-CGI	FALSE	FALSE	TRUE
cg01645806	chr6	170189779	170189780	LINC00574	80069	-388	CGI-N-Shore	TRUE	TRUE	FALSE
cg01704860	chr6	30550855	30550856	MIR877	100126314	-1252	Non-CGI	TRUE	TRUE	FALSE
cg01769232	chr6	110300218	110300219	GPR6	2830	-78	CGI	TRUE	TRUE	FALSE
cg02086355	chr6	35743107	35743108	CLPSL2	389383	-1283	CGI-N-Shore	TRUE	FALSE	FALSE
cg03818715	chr6	7591348	7591349	SNRNP48	154007	915	CGI-S-Shore	FALSE	TRUE	FALSE
cg04138171	chr6	30308084	30308085	RPP21	79897	-4820	Non-CGI	FALSE	TRUE	FALSE
cg05064044	chr6	292385	292386	DUSP22	56940	283	CGI	TRUE	FALSE	FALSE
cg06841863	chr6	26660164	26660165	ZNF322	79692	-183	CGI-S-Shore	TRUE	FALSE	FALSE
cg07332563	chr6	291687	291688	DUSP22	56940	-412	CGI-N-Shore	TRUE	FALSE	FALSE
cg07963121	chr6	116692748	116692749	FAM26F	441168	-89806	CGI	FALSE	TRUE	FALSE
cg08073652	chr6	43418057	43418058	DLK2	65989	5727	Non-CGI	FALSE	TRUE	FALSE
cg08714544	chr6	169631174	169631175	THBS2	7058	22961	CGI-S-Shore	FALSE	TRUE	FALSE
cg09582880	chr6	52050133	52050134	IL17A	3605	-1050	Non-CGI	TRUE	FALSE	FALSE
cg09876568	chr6	28910953	28910954	TRIM27	5987	-19184	CGI-S-Shore	TRUE	FALSE	FALSE
cg10002784	chr6	7883339	7883340	TXNDC5	81567	27706	CGI-N-Shore	FALSE	TRUE	FALSE
cg11212237	chr6	116358814	116358815	TPI1P3	728402	-1078	Non-CGI	TRUE	TRUE	FALSE
cg11235426	chr6	292522	292523	DUSP22	56940	420	CGI	TRUE	FALSE	FALSE
cg11468000	chr6	139694674	139694675	CITED2	10370	1109	CGI	TRUE	TRUE	FALSE
cg11938672	chr6	170055155	170055156	WDR27	253769	47002	CGI	FALSE	TRUE	FALSE
cg11999886	chr6	65341479	65341480	PHF3	23469	995753	Non-CGI	FALSE	TRUE	FALSE
cg12048225	chr6	32808669	32808670	TAP2	6891	-2121	CGI-S-Shelf	FALSE	TRUE	FALSE
cg12179641	chr6	32188404	32188405	NOTCH4	4855	3438	Non-CGI	FALSE	TRUE	FALSE
cg12297970	chr6	53208623	53208624	ELOVL5	60481	5352	CGI-N-Shelf	FALSE	TRUE	FALSE
cg13355449	chr6	46923414	46923415	GPR116	221395	-738	Non-CGI	TRUE	FALSE	FALSE
cg14235350	chr6	157802496	157802497	ZDHHC14	79683	-59	CGI	TRUE	FALSE	FALSE
cg14581491	chr6	32095556	32095557	ATF6B	1388	459	CGI	TRUE	TRUE	FALSE
cg14666908	chr6	31937758	31937759	STK19	8859	-1192	CGI-N-Shore	TRUE	TRUE	FALSE
cg15085024	chr6	43304175	43304176	CRIP3	401262	-27644	Non-CGI	FALSE	TRUE	FALSE
cg15383120	chr6	291909	291910	DUSP22	56940	-190	CGI-N-Shore	TRUE	FALSE	FALSE
cg15855450	chr6	26103952	26103953	HIST1H4C	8364	-222	CGI-N-Shore	TRUE	FALSE	FALSE
cg16857825	chr6	35994825	35994826	MAPK14	1432	-627	CGI-N-Shore	TRUE	FALSE	FALSE
cg18761763	chr6	168424818	168424819	KIF25	3834	25045	CGI-N-Shore	FALSE	TRUE	FALSE
cg18880646	chr6	97375699	97375700	KLHL32	114792	3202	CGI-S-Shelf	FALSE	TRUE	FALSE
cg19749916	chr6	106441456	106441457	PRDM1	639	-92737	CGI-S-Shore	FALSE	FALSE	TRUE
cg21548813	chr6	291882	291883	DUSP22	56940	-217	CGI-N-Shore	TRUE	FALSE	FALSE
cg21606287	chr6	31916705	31916706	MIR1236	100302242	8010	CGI-S-Shore	FALSE	TRUE	FALSE
cg22484599	chr6	31628369	31628370	C6orf47	57827	178	CGI	TRUE	FALSE	FALSE
cg22503047	chr6	31601411	31601412	SNORA38	677820	10554	CGI-S-Shore	FALSE	TRUE	FALSE
cg23372001	chr6	27791640	27791641	HIST1H4J	8363	-261	CGI-N-Shore	TRUE	FALSE	FALSE
cg23998211	chr6	86303771	86303772	SNX14	57231	-141	CGI	TRUE	FALSE	FALSE
cg24176040	chr6	31129358	31129359	TCF19	6941	3054	CGI-S-Shelf	FALSE	TRUE	FALSE
cg25120945	chr6	29975416	29975417	HCG9	10255	32523	CGI-S-Shore	FALSE	TRUE	FALSE
cg25637836	chr6	80816087	80816088	BCKDHB	594	-255	CGI-N-Shore	TRUE	FALSE	FALSE
cg26015971	chr6	31685491	31685492	LY6G6D	58530	2357	Non-CGI	FALSE	TRUE	FALSE
cg26645432	chr6	33048502	33048503	HLA-DPA1	3113	51	CGI	TRUE	TRUE	FALSE
ch.6.2949012F	chr6	152044517	152044519	ESR1	2099	32885	Non-CGI	FALSE	TRUE	FALSE
cg00731958	chr7	48081031	48081032	C7orf57	136288	5913	CGI-N-Shelf	TRUE	TRUE	FALSE
cg01197302	chr7	4859667	4859668	MIR4656	100616465	-31396	CGI-S-Shore	FALSE	TRUE	FALSE
cg01807619	chr7	151127947	151127948	MIR3907	100500835	2776	Non-CGI	FALSE	TRUE	FALSE
cg01966732	chr7	130580290	130580291	LOC646329	646329	17777	CGI-N-Shore	FALSE	TRUE	FALSE
cg04379469	chr7	98568573	98568574	MIR3609	100500819	89299	CGI	FALSE	TRUE	FALSE
cg06866451	chr7	84267140	84267141	SEMA3A	10371	-442922	Non-CGI	FALSE	FALSE	TRUE
cg07843733	chr7	140567399	140567400	BRAF	673	57163	Non-CGI	FALSE	TRUE	FALSE
cg08070476	chr7	16887412	16887413	AGR3	155465	34199	CGI-N-Shelf	FALSE	FALSE	TRUE
cg08104492	chr7	127408129	127408130	SND1	27044	115926	Non-CGI	FALSE	TRUE	FALSE
cg09008589	chr7	42214329	42214330	GLI3	2737	62287	CGI	FALSE	TRUE	FALSE
cg09123693	chr7	157402637	157402638	MIR153-2	406945	-35522	CGI	FALSE	TRUE	FALSE
cg10374962	chr7	1011985	1011986	ADAP1	11033	3248	CGI-N-Shore	FALSE	TRUE	FALSE
cg11026400	chr7	157427597	157427598	MIR153-2	406945	-60482	Non-CGI	FALSE	TRUE	FALSE
cg11510182	chr7	24894503	24894504	DFNA5	1687	-96863	Non-CGI	FALSE	TRUE	FALSE
cg13518529	chr7	78101371	78101372	RPL13AP17	399670	124811	Non-CGI	FALSE	TRUE	FALSE
cg14891617	chr7	158092647	158092648	MIR595	693180	232856	Non-CGI	FALSE	TRUE	FALSE
cg15432532	chr7	27706637	27706638	HIBADH	11112	-4016	CGI-S-Shelf	FALSE	FALSE	TRUE
cg16584911	chr7	128864557	128864558	AHCYL2	23382	-296	CGI	TRUE	FALSE	FALSE
cg18446472	chr7	44253807	44253808	YKT6	10652	13228	Non-CGI	FALSE	TRUE	FALSE
cg19053929	chr7	91502092	91502093	MTERF	7978	7922	Non-CGI	FALSE	TRUE	FALSE
cg19061632	chr7	140395616	140395617	NDUFB2	4708	-863	CGI-N-Shore	TRUE	TRUE	FALSE
cg19198568	chr7	28997866	28997867	LOC100506497	100506497	-21715	CGI	TRUE	FALSE	FALSE
cg19981991	chr7	31232831	31232832	ADCYAP1R1	117	140754	CGI	FALSE	FALSE	TRUE
cg21308760	chr7	141629801	141629802	OR9A4	130075	11124	CGI-S-Shelf	FALSE	TRUE	FALSE
cg21656801	chr7	96625955	96625956	DLX6	1750	-9333	CGI	FALSE	TRUE	FALSE
cg21682399	chr7	128767420	128767421	LOC407835	407835	1094	CGI	TRUE	FALSE	FALSE
cg22466550	chr7	562173	562174	FLJ44511	441307	2144	CGI-S-Shore	TRUE	FALSE	FALSE
cg23472261	chr7	142560422	142560423	EPHB6	2051	7629	CGI-N-Shore	TRUE	TRUE	FALSE
cg24435704	chr7	139763773	139763774	PARP12	64761	-251	CGI-S-Shore	TRUE	FALSE	FALSE
cg00930833	chr8	41168264	41168265	SFRP1	6422	-1273	CGI-S-Shore	TRUE	FALSE	FALSE
cg01245191	chr8	94746897	94746898	RBM12B-AS1	55472	-5440	CGI-S-Shore	TRUE	TRUE	FALSE
cg03648734	chr8	104411856	104411857	DCAF13	25879	-15084	Non-CGI	FALSE	TRUE	FALSE
cg12991609	chr8	1101551	1101552	LOC286083	286083	149274	CGI	FALSE	FALSE	TRUE
cg16309727	chr8	117963055	117963056	SLC30A8	169026	542	CGI-S-Shore	TRUE	TRUE	FALSE
cg20710138	chr8	61561414	61561415	CHD7	55636	-29908	CGI-N-Shelf	FALSE	FALSE	TRUE
cg20744156	chr8	9476731	9476732	TNKS	8658	63285	Non-CGI	FALSE	TRUE	FALSE
cg21971146	chr8	49390373	49390374	EFCAB1	79645	257495	CGI	FALSE	FALSE	TRUE
cg22006704	chr8	1201838	1201839	LOC286083	286083	48987	CGI	FALSE	FALSE	TRUE
cg25398727	chr8	10756220	10756221	PINX1	54984	-58920	CGI	FALSE	TRUE	FALSE
ch.8.2102814R	chr8	103851595	103851597	AZIN1	51582	24799	Non-CGI	FALSE	TRUE	FALSE
cg13780295	chr9	138384845	138384846	C9orf116	138162	7517	CGI-N-Shore	FALSE	FALSE	TRUE
cg14159256	chr9	81642187	81642188	TLE4	7091	-544689	Non-CGI	FALSE	FALSE	TRUE
cg14500932	chr9	126534337	126534338	DENND1A	57706	158078	Non-CGI	FALSE	TRUE	FALSE
cg20211653	chr9	107688724	107688725	ABCA1	19	1801	CGI	TRUE	TRUE	FALSE
cg21185421	chr9	71394810	71394811	FAM122A	116224	-152	CGI-N-Shore	TRUE	TRUE	FALSE
cg01282921	chr10	79635975	79635976	DLG5	9231	50371	Non-CGI	FALSE	TRUE	FALSE
cg02030034	chr10	101292403	101292404	NKX2-3	159296	-285	CGI	TRUE	FALSE	FALSE
cg02089135	chr10	105614699	105614700	SH3PXD2A	9644	463	CGI	FALSE	TRUE	FALSE
cg03922262	chr10	77868130	77868131	C10orf11	83938	325610	CGI-N-Shelf	FALSE	TRUE	FALSE
cg04089420	chr10	1378575	1378576	LINC00200	399706	172866	CGI-N-Shelf	FALSE	TRUE	FALSE
cg06876157	chr10	129197625	129197626	NPS	594857	-149986	CGI-S-Shore	FALSE	TRUE	FALSE
cg10100652	chr10	91589501	91589502	LOC643529	643529	250	Non-CGI	TRUE	FALSE	FALSE
cg14990643	chr10	85956936	85956937	CDHR1	92211	2523	CGI-S-Shore	FALSE	TRUE	FALSE
cg16178622	chr10	72271510	72271511	PALD1	27143	32945	Non-CGI	FALSE	TRUE	FALSE
cg17292729	chr10	31363730	31363731	ZNF438	220929	-42863	Non-CGI	FALSE	FALSE	TRUE
cg17744037	chr10	63834800	63834801	ARID5B	84159	173786	Non-CGI	FALSE	TRUE	FALSE
cg18841653	chr10	5046097	5046098	AKR1C2	1646	14126	Non-CGI	TRUE	TRUE	FALSE
cg19245941	chr10	110671988	110671989	XPNPEP1	7511	1011321	CGI	FALSE	FALSE	TRUE
cg19275309	chr10	35761088	35761089	GJD4	219770	-133248	CGI-N-Shore	FALSE	TRUE	FALSE
cg19658209	chr10	103052161	103052162	BTRC	8945	-61662	CGI	FALSE	FALSE	TRUE
cg20038591	chr10	119306659	119306660	EMX2OS	196047	-2079	CGI-S-Shore	FALSE	TRUE	FALSE
cg20684696	chr10	520447	520448	PRR26	414235	-175439	CGI-S-Shore	FALSE	TRUE	FALSE
cg22939703	chr10	131357171	131357172	MGMT	4255	91716	CGI-S-Shore	FALSE	TRUE	FALSE
cg23131974	chr10	1767723	1767724	ADARB2	105	11945	CGI	FALSE	TRUE	FALSE
cg26518861	chr10	122708898	122708899	WDR11-AS1	283089	-98206	CGI	FALSE	FALSE	TRUE
cg27021181	chr10	5488346	5488347	NET1	10276	33827	CGI-N-Shore	TRUE	TRUE	FALSE
ch.10.80205838R	chr10	80535832	80535834	ZMIZ1-AS1	283050	292701	Non-CGI	FALSE	FALSE	TRUE
ch.10.2686225R	chr10	126090281	126090283	OAT	4942	17261	Non-CGI	FALSE	TRUE	FALSE
cg01460619	chr11	69453653	69453654	CCND1	595	-2218	CGI-S-Shore	FALSE	FALSE	TRUE
cg02564733	chr11	130319074	130319075	ADAMTS15	170689	204	CGI	TRUE	FALSE	FALSE
cg02713832	chr11	60772559	60772560	CD6	923	33445	CGI-N-Shelf	FALSE	TRUE	FALSE
cg02794589	chr11	70049600	70049601	FADD	8772	330	CGI	TRUE	FALSE	FALSE
cg03196437	chr11	118843000	118843001	FOXR1	283150	582	CGI	FALSE	TRUE	FALSE
cg05262777	chr11	129119447	129119448	ARHGAP32	9743	-57353	Non-CGI	FALSE	FALSE	TRUE
cg05812599	chr11	72146256	72146257	CLPB	81570	-571	CGI-S-Shore	TRUE	FALSE	FALSE
cg06417460	chr11	60869760	60869761	CD5	921	-168	Non-CGI	TRUE	FALSE	FALSE
cg07484827	chr11	3693157	3693158	CHRNA10	57053	-542	Non-CGI	TRUE	FALSE	FALSE
cg08626382	chr11	62108591	62108592	ASRGL1	80150	3816	CGI-S-Shelf	FALSE	TRUE	FALSE
cg09136245	chr11	20631761	20631762	SLC6A5	9152	10814	CGI-N-Shore	FALSE	TRUE	FALSE
cg10101263	chr11	130786633	130786634	SNX19	399979	-250	CGI	TRUE	FALSE	FALSE
cg11117684	chr11	100599394	100599395	ARHGAP42	143872	40986	Non-CGI	FALSE	TRUE	FALSE
cg11671925	chr11	67806426	67806427	TCIRG1	10312	-34	CGI	TRUE	FALSE	FALSE
cg14234912	chr11	103677503	103677504	MIR4693	100616457	-43129	Non-CGI	FALSE	FALSE	TRUE
cg14481339	chr11	128737319	128737320	KCNJ1	3758	-50	Non-CGI	TRUE	FALSE	FALSE
cg14731044	chr11	19259298	19259299	E2F8	79733	3867	CGI-N-Shelf	FALSE	TRUE	FALSE
cg15159131	chr11	132107699	132107700	NTM	50863	867327	CGI-S-Shore	FALSE	TRUE	FALSE
cg15269875	chr11	2018018	2018019	MIR675	100033819	41	CGI	TRUE	FALSE	FALSE
cg17080087	chr11	117389470	117389471	CEP164	22897	197037	CGI	FALSE	TRUE	FALSE
cg18776207	chr11	72292402	72292403	MIR139	406931	33770	CGI-N-Shelf	FALSE	TRUE	FALSE
cg20585500	chr11	64703192	64703193	GPHA2	170589	166	Non-CGI	FALSE	TRUE	FALSE
cg20716688	chr11	1411018	1411019	BRSK2	9024	-109	CGI	TRUE	FALSE	FALSE
cg22330638	chr11	45732392	45732393	CHST1	8534	-45185	Non-CGI	TRUE	FALSE	FALSE
cg07091934	chr12	116639897	116639898	MIR620	693205	-53437	Non-CGI	FALSE	TRUE	FALSE
cg08183077	chr12	50990377	50990378	DIP2B	57609	91608	Non-CGI	FALSE	TRUE	FALSE
cg08332868	chr12	114404181	114404182	RBM19	9904	-4	CGI	TRUE	FALSE	FALSE
cg10971122	chr12	7261915	7261916	C1RL	51279	-45	Non-CGI	TRUE	TRUE	FALSE
cg12202370	chr12	76428445	76428446	PHLDA1	22822	-2888	CGI-S-Shore	FALSE	FALSE	TRUE
cg14296129	chr12	56367904	56367905	RAB5B	5869	206	CGI	TRUE	TRUE	FALSE
cg14909213	chr12	8694468	8694469	CLEC4E	26253	-909	Non-CGI	TRUE	FALSE	FALSE
cg17281677	chr12	6658557	6658558	IFFO1	25900	6690	CGI-S-Shore	TRUE	TRUE	FALSE
cg19133948	chr12	76856664	76856665	OSBPL8	114882	96923	Non-CGI	FALSE	TRUE	FALSE
cg19685229	chr12	116587387	116587388	MIR620	693205	-927	Non-CGI	TRUE	TRUE	FALSE
cg19968199	chr12	68056168	68056169	DYRK2	8445	13655	Non-CGI	FALSE	TRUE	FALSE
cg20377881	chr12	27930307	27930308	KLHL42	57542	-2878	CGI-N-Shelf	FALSE	FALSE	TRUE
cg20970752	chr12	7943244	7943245	NANOG	79923	1248	Non-CGI	FALSE	TRUE	FALSE
cg21544415	chr12	26288686	26288687	BHLHE41	79365	-10682	Non-CGI	FALSE	TRUE	FALSE
cg22052955	chr12	53625898	53625899	RARG	5916	140	CGI	TRUE	FALSE	FALSE
cg24615853	chr12	30978660	30978661	LOC100287314	100287314	30044	CGI-S-Shelf	FALSE	FALSE	TRUE
cg25619549	chr12	49779016	49779017	LOC100335030	100335030	-3939	Non-CGI	FALSE	TRUE	FALSE
cg27366263	chr12	96332678	96332679	CCDC38	120935	3748	CGI-N-Shelf	FALSE	TRUE	FALSE
cg02219700	chr13	95623675	95623676	SOX21	11166	-259285	CGI-S-Shelf	FALSE	FALSE	TRUE
cg04786592	chr13	52375776	52375777	DHRS12	79758	2515	CGI-N-Shelf	FALSE	TRUE	FALSE
cg04925385	chr13	52378555	52378556	DHRS12	79758	-261	CGI	TRUE	FALSE	FALSE
cg11599984	chr13	80914014	80914015	SPRY2	10253	1070	CGI-S-Shore	TRUE	TRUE	FALSE
cg12598163	chr13	111806585	111806586	ARHGEF7	8874	38960	CGI	FALSE	TRUE	FALSE
cg16217343	chr13	50363191	50363192	KPNA3	3839	3864	CGI-N-Shelf	FALSE	TRUE	FALSE
cg16557370	chr13	27295982	27295983	GPR12	2835	38938	CGI-N-Shore	FALSE	FALSE	TRUE
cg20121278	chr13	99446885	99446886	SLC15A1	6564	-41955	Non-CGI	FALSE	TRUE	FALSE
cg22162694	chr13	24323408	24323409	C1QTNF9B-AS1	542767	-139618	Non-CGI	FALSE	TRUE	FALSE
cg26015681	chr13	22329773	22329774	FGF9	2254	84557	Non-CGI	FALSE	FALSE	TRUE
cg04399872	chr14	50155771	50155772	POLE2	5427	-672	CGI-S-Shore	TRUE	TRUE	FALSE
cg04785187	chr14	99997549	99997550	CCNK	8812	49809	Non-CGI	FALSE	TRUE	FALSE
cg07110232	chr14	104164402	104164403	XRCC3	7517	17419	CGI-N-Shore	FALSE	TRUE	FALSE
cg10128164	chr14	31344535	31344536	COCH	1690	793	CGI	FALSE	TRUE	FALSE
cg12160741	chr14	105760556	105760557	PACS2	23241	-6612	Non-CGI	FALSE	TRUE	FALSE
cg14053764	chr14	55761432	55761433	FBXO34	55030	23410	CGI-N-Shelf	FALSE	TRUE	FALSE
cg14165308	chr14	37051703	37051704	NKX2-8	26257	81	CGI	TRUE	FALSE	FALSE
cg16746455	chr14	35343581	35343582	BAZ1A	11177	1270	CGI	FALSE	TRUE	FALSE
cg19600328	chr14	93651164	93651165	MOAP1	64112	83	CGI	TRUE	FALSE	FALSE
cg21125441	chr14	52533693	52533694	NID2	22795	2251	CGI-N-Shore	FALSE	TRUE	FALSE
cg21237959	chr14	90967496	90967497	LINC00642	400238	45921	Non-CGI	FALSE	FALSE	TRUE
cg23709855	chr14	21927732	21927733	RAB2B	84932	17398	CGI-S-Shelf	FALSE	TRUE	FALSE
cg25346972	chr14	70826282	70826283	COX16	51241	164	CGI	TRUE	TRUE	FALSE
cg01578341	chr15	82338527	82338528	MEX3B	84206	-165	CGI	TRUE	FALSE	FALSE
cg07146507	chr15	49328626	49328627	SECISBP2L	9728	10132	Non-CGI	FALSE	TRUE	FALSE
cg07544511	chr15	75748083	75748084	SIN3A	25942	39	CGI	TRUE	FALSE	FALSE
cg07625156	chr15	43426262	43426263	TMEM62	80021	539	CGI	TRUE	TRUE	FALSE
cg11790217	chr15	68346484	68346485	PIAS1	8554	-86	CGI	TRUE	FALSE	FALSE
cg12117975	chr15	95577957	95577958	LOC400456	400456	292370	Non-CGI	FALSE	FALSE	TRUE
cg14726357	chr15	85326723	85326724	ALPK3	57538	-33186	Non-CGI	FALSE	TRUE	FALSE
cg15566783	chr15	23034186	23034187	NIPA2	81614	239	CGI	TRUE	FALSE	FALSE
cg16926930	chr15	56657658	56657659	TEX9	374618	13	CGI	TRUE	FALSE	FALSE
cg17893775	chr15	60662488	60662489	ANXA2	302	27695	CGI-S-Shelf	FALSE	TRUE	FALSE
cg22147262	chr15	51383486	51383487	TNFAIP8L3	388121	13985	CGI-N-Shelf	FALSE	TRUE	FALSE
cg24374996	chr15	91478185	91478186	HDDC3	374659	-2410	CGI	TRUE	TRUE	FALSE
cg25948332	chr15	90886793	90886794	GABARAPL3	23766	5884	Non-CGI	FALSE	FALSE	TRUE
cg27058988	chr15	67200879	67200880	SMAD3	4088	-157314	Non-CGI	FALSE	FALSE	TRUE
cg01718071	chr16	2129354	2129355	MIR1225	100188847	10929	CGI	FALSE	TRUE	FALSE
cg02593884	chr16	2984574	2984575	FLYWCH1	84256	22593	CGI	FALSE	TRUE	FALSE
cg05226168	chr16	68118441	68118442	NFATC3	4775	-211	CGI	TRUE	FALSE	FALSE
cg05319212	chr16	66864375	66864376	NAE1	8883	502	CGI-N-Shore	FALSE	TRUE	FALSE
cg09074450	chr16	1198900	1198901	CACNA1H	8912	-4339	CGI-S-Shore	FALSE	FALSE	TRUE
cg09457490	chr16	15948619	15948620	MYH11	4629	2266	CGI-N-Shelf	FALSE	TRUE	FALSE
cg14102807	chr16	28943677	28943678	CD19	930	416	Non-CGI	FALSE	TRUE	FALSE
cg00571067	chr17	53871788	53871789	PCTP	58488	43447	Non-CGI	FALSE	FALSE	TRUE
cg01436159	chr17	79944614	79944615	ASPSCR1	79058	9187	CGI-N-Shore	FALSE	TRUE	FALSE
cg02110776	chr17	983522	983523	MIR3183	100422835	-57722	CGI-S-Shore	TRUE	TRUE	FALSE
cg03167683	chr17	47210368	47210369	B4GALNT2	124872	545	CGI	TRUE	TRUE	FALSE
cg03747002	chr17	7907439	7907440	GUCY2D	3000	1450	CGI-S-Shore	FALSE	TRUE	FALSE
cg03986989	chr17	1132754	1132755	BHLHA9	727857	-41102	CGI	FALSE	FALSE	TRUE
cg04970434	chr17	4838096	4838097	GP1BA	2811	2503	Non-CGI	TRUE	TRUE	FALSE
cg05056653	chr17	81023856	81023857	METRNL	284207	-13709	CGI	FALSE	FALSE	TRUE
cg05571310	chr17	72350354	72350355	BTBD17	388419	7602	CGI-N-Shore	FALSE	TRUE	FALSE
cg06475626	chr17	53316111	53316112	HLF	3131	-26208	CGI	FALSE	FALSE	TRUE
cg06961093	chr17	4634634	4634635	MED11	400569	-87	CGI	TRUE	FALSE	FALSE
cg07722368	chr17	26554907	26554908	PYY2	23615	1317	CGI	FALSE	TRUE	FALSE
cg08806120	chr17	56679904	56679905	C17orf47	284083	-58170	Non-CGI	FALSE	TRUE	FALSE
cg09727034	chr17	49017971	49017972	TOB1	10140	-72631	CGI-N-Shelf	FALSE	FALSE	TRUE
cg10858415	chr17	68128832	68128833	KCNJ2	3759	-35980	CGI-S-Shelf	TRUE	TRUE	FALSE
cg11856697	chr17	72276937	72276938	DNAI2	64446	6550	Non-CGI	FALSE	TRUE	FALSE
cg12731833	chr17	47022611	47022612	SNF8	11267	-456	CGI-S-Shore	TRUE	FALSE	FALSE
cg12802113	chr17	56741	56742	DOC2B	8447	-25320	CGI	FALSE	FALSE	TRUE
cg13222022	chr17	59017682	59017683	BCAS3	54828	262509	Non-CGI	FALSE	TRUE	FALSE
cg14427590	chr17	60695089	60695090	MRC2	9902	-9671	Non-CGI	FALSE	FALSE	TRUE
cg14556286	chr17	80888129	80888130	ZNF750	79755	-90197	CGI	TRUE	TRUE	FALSE
cg16315992	chr17	62498297	62498298	MIR5047	100616408	-865	CGI-N-Shelf	TRUE	TRUE	FALSE
cg17530586	chr17	7155221	7155222	CTDNEP1	23399	36	CGI	TRUE	FALSE	FALSE
cg18366149	chr17	61483413	61483414	CYB561	1534	40307	Non-CGI	FALSE	TRUE	FALSE
cg23686321	chr17	29245718	29245719	ADAP2	55803	-3034	CGI-N-Shelf	FALSE	FALSE	TRUE
cg23772500	chr17	38137489	38137490	PSMD3	5709	428	CGI-S-Shore	FALSE	TRUE	FALSE
cg24034453	chr17	17597825	17597826	RAI1	10743	13037	CGI	FALSE	TRUE	FALSE
cg25237720	chr17	11925041	11925042	MAP2K4	6416	905	CGI-S-Shore	FALSE	TRUE	FALSE
cg25646095	chr17	22195182	22195183	MTRNR2L1	100462977	172744	CGI-S-Shore	FALSE	FALSE	TRUE
cg27093376	chr17	5185073	5185074	RABEP1	9135	-483	CGI-N-Shore	TRUE	FALSE	FALSE
cg02193951	chr18	76753446	76753447	SALL3	27164	13170	CGI	TRUE	TRUE	FALSE
cg04171329	chr18	47340234	47340235	ACAA2	10449	15	CGI-S-Shore	TRUE	FALSE	FALSE
cg05945943	chr18	60986770	60986771	BCL2	596	-112	CGI	TRUE	FALSE	FALSE
cg19392955	chr18	15198706	15198707	LOC644669	644669	127210	CGI-S-Shore	FALSE	FALSE	TRUE
cg27628090	chr18	2538512	2538513	METTL4	64863	32975	Non-CGI	FALSE	TRUE	FALSE
cg00841249	chr19	58190208	58190209	ZNF776	284309	-3147	CGI-N-Shelf	FALSE	TRUE	FALSE
cg02162069	chr19	57352134	57352135	ZIM2	23619	-36	CGI	TRUE	FALSE	FALSE
cg03243311	chr19	3121379	3121380	GNA15	2769	-14810	CGI-S-Shore	TRUE	TRUE	FALSE
cg04601383	chr19	6713459	6713460	C3	718	7201	CGI-S-Shelf	FALSE	TRUE	FALSE
cg05312962	chr19	2576254	2576255	GADD45B	4616	100130	CGI	FALSE	TRUE	FALSE
cg07083818	chr19	18385672	18385673	KIAA1683	80726	-352	Non-CGI	TRUE	FALSE	FALSE
cg07812957	chr19	16466298	16466299	KLF2	10365	30646	CGI-N-Shore	FALSE	TRUE	FALSE
cg07967308	chr19	11688246	11688247	ACP5	54	1553	CGI-N-Shore	FALSE	TRUE	FALSE
cg09970481	chr19	42379744	42379745	CD79A	973	-1444	CGI-N-Shelf	TRUE	FALSE	FALSE
cg11915997	chr19	7745524	7745525	TRAPPC5	126003	-181	CGI-N-Shore	TRUE	FALSE	FALSE
cg14012826	chr19	58083387	58083388	ZNF416	55659	6854	Non-CGI	FALSE	TRUE	FALSE
cg14724750	chr19	51611672	51611673	CTU1	90353	-24	CGI	TRUE	FALSE	FALSE
cg14941212	chr19	44774786	44774787	ZNF233	353355	10752	Non-CGI	FALSE	TRUE	FALSE
cg17789193	chr19	14533491	14533492	DDX39A	10212	-3295	CGI-S-Shelf	FALSE	FALSE	TRUE
cg17858098	chr19	39318588	39318589	ECH1	1891	3907	CGI-N-Shelf	FALSE	TRUE	FALSE
cg22865050	chr19	11457020	11457021	TMEM205	374882	-38	CGI	TRUE	FALSE	FALSE
cg24703175	chr19	15311588	15311589	NOTCH3	4854	202	CGI	FALSE	TRUE	FALSE
cg25371658	chr19	19168824	19168825	SLC25A42	284439	-5977	Non-CGI	FALSE	TRUE	FALSE
cg03352168	chr20	60478214	60478215	MIR1257	100302168	50502	CGI-S-Shore	FALSE	TRUE	FALSE
cg04025889	chr20	32891089	32891090	AHCY	191	8517	CGI	TRUE	TRUE	FALSE
cg04354077	chr20	5295137	5295138	PROKR2	128674	2239	CGI-N-Shore	TRUE	TRUE	FALSE
cg08117745	chr20	20998031	20998032	PLK1S1	55857	-108591	CGI-N-Shelf	FALSE	FALSE	TRUE
cg10258966	chr20	61810795	61810796	MIR124-3	406909	942	CGI	FALSE	FALSE	TRUE
cg12322852	chr20	4764077	4764078	RASSF2	9770	40212	Non-CGI	FALSE	TRUE	FALSE
cg17071192	chr20	57413698	57413699	GNAS	2778	-1095	CGI-N-Shore	TRUE	TRUE	FALSE
cg21045560	chr20	36157760	36157761	BLCAP	10904	-1426	CGI-S-Shore	TRUE	FALSE	FALSE
cg25011176	chr20	3776985	3776986	CDC25B	994	9406	CGI	TRUE	TRUE	FALSE
cg26097364	chr20	25657028	25657029	ZNF337	26152	20439	Non-CGI	FALSE	TRUE	FALSE
ch.20.22462067R	chr20	22514067	22514069	LINC00261	140828	45210	Non-CGI	FALSE	FALSE	TRUE
cg00806296	chr21	43271156	43271157	PRDM15	63977	28433	CGI	FALSE	TRUE	FALSE
cg01150982	chr21	33664555	33664556	MRAP	56246	430	Non-CGI	FALSE	TRUE	FALSE
cg07608496	chr21	47649218	47649219	MCM3AP-AS1	114044	59	CGI	TRUE	TRUE	FALSE
cg08632701	chr21	37451849	37451850	SETD4	54093	-161	Non-CGI	TRUE	TRUE	FALSE
cg10270055	chr21	43221559	43221560	RIPK4	54101	-34309	CGI	FALSE	TRUE	FALSE
cg11354857	chr21	32128696	32128697	KRTAP21-1	337977	-999	Non-CGI	TRUE	FALSE	FALSE
cg01021169	chr22	30184971	30184972	UQCR10	29796	21612	Non-CGI	FALSE	TRUE	FALSE
cg01698954	chr22	31198623	31198624	MIR3200	100422912	71078	CGI	FALSE	TRUE	FALSE
cg02163215	chr22	45996347	45996348	ATXN10	25814	-71329	Non-CGI	TRUE	TRUE	FALSE
cg03962200	chr22	31518707	31518708	INPP5J	27124	14745	Non-CGI	TRUE	TRUE	FALSE
cg09204618	chr22	19117090	19117091	TSSK2	23617	-1229	CGI-N-Shore	TRUE	FALSE	FALSE
cg11013355	chr22	35796703	35796704	MCM5	4174	586	CGI-S-Shore	FALSE	TRUE	FALSE
cg12983550	chr22	26568302	26568303	SEZ6L	23544	2861	CGI-S-Shelf	FALSE	TRUE	FALSE
cg20271511	chr22	17566989	17566990	IL17RA	23765	1137	CGI	FALSE	TRUE	FALSE
cg21382800	chr22	29661771	29661772	RHBDD3	25807	2141	CGI-N-Shore	FALSE	TRUE	FALSE
ch.22.467397R	chr22	33096709	33096711	TIMP3	7078	-100090	Non-CGI	FALSE	TRUE	FALSE
