# Supplementary material for: H3K4me1 marks DNA regions hypomethylated during aging in human stem and differentiated cells
Source: HighWire-hosted journal article supplement (doi:10.1101/gr.169011.113), 2014-09-30
Supplement: Supplemental_Table_26.xlsx [file Supplemental_Table_26.xlsx]

## Sheet: ST26
Supplemental Table 26: Chromatin marks (histone modifications and chromatin modifiers) and cells contained in the UCSC Browser Broad Histone track used in the analyses.
Chromatin marks		Cells	Description	Tissue
H3k4me1		Osteobl	osteoblasts (NHOst)	bone
H3k4me2		GM12878	B-lymphocyte, lymphoblastoid, International HapMap Project - CEPH/Utah - European Caucasion, Epstein-Barr Virus	blood
H3k4me3		Monocytes-CD14+_RO01746	Monocytes-CD14+ are CD14-positive cells from human leukapheresis production, from donor RO 01746 (draw 1 ID is RO 01746, draw 2 ID is RO 01826), Monocytes-CD14+_RO01746 and Monocytes-CD14+_RO01826 are being used as replicates, newly promoted to tier 2: not in 2011 analysis	monocytes
H3k9ac		NH-A	astrocytes (also called Astrocy)	brain
H3k9me1		NHLF	lung fibroblasts	lung
H3k9me3		NHEK	epidermal keratinocytes	skin
H3k27me3		NHDF-Ad	adult dermal fibroblasts	skin
H3k27ac		HSMM	skeletal muscle myoblasts	muscle
H3k36me3		HMEC	mammary epithelial cells	breast
H3k79me2		HUVEC	umbilical vein endothelial cells	blood vessel
H4k20me1
Ctcf
Ezh2
H2az
Pol2b
Suz12
