# Supplementary material for: H3K4me1 marks DNA regions hypomethylated during aging in human stem and differentiated cells
Source: HighWire-hosted journal article supplement (doi:10.1101/gr.169011.113), 2014-09-30
Supplement: Supplemental_Table_27.xlsx [file Supplemental_Table_27.xlsx]

## Sheet: ST27
Supplemental Table 27. Primers used for pyrosequencing validations
Gene	Sequence (5'-3')
HAND2	F: AGGTTAGGTTAGTTTAAGGGAGATT
	B-R: TCCTACCCCAACCACTTT
	S: GGAGATTAAAGATTTTATTTTGAGT
SIX2	F: GGGTTGGATGATGAGTGGT
	B-R: ACTCCAATTCTAACAACCACAAC
	S: ATGATGAGTGGTTTGG
TBX15	B-F: TAGGGGGTTTATAGTTTGTTAAGAT
	R: ACACCAAAACACTTCCAACTATAATAAT
	S: CCTAACAAATCATCTTTTCT
PITX2	F: AGGGAGGAAGTTTGTGTATAT
	B-R: CTACACTACAACCCCTTTAAACCTA
	S: ATTGGGTTAAAGTTATTTAATAAT
HOXA11	B-F: GGAGTAGTAGTGGGTTAGATTG
	R: AAATTTCTCCAACCTCCCTTCTTT
	S: AAATAACCTTCAAAAAATAC
F: Forward, R: Reverse, S: Sequencing, B: Biotinylated
